# Supplementary material for: Conditional and unconditional components of aversively motivated freezing, flight and darting in mice
Source: eLife. 2022 May 26;11:e75663. doi: 10.7554/eLife.75663 (PMC9173745; doi:10.7554/eLife.75663)
Supplement: Figure 1—figure supplement 1—source data 1. [file elife-75663-fig1-figsupp1-data1.xlsx]

## Sheet: Sheet1
Raw velocity data, extracted via ethovision, which is fed to R source code 1 to detect and extract darts, and to produce velocity traces
Showing Data from Day 1 for an example animal in the Replication Group in Experiment 1
As shown in Figure 1-figure supplement 1
Trial 8	6.3	Rep	F	Start-0:00:00.266	BL	1.35245	7	5.79044
Trial 8	6.3	Rep	F	0:00:00.266-0:00:00.532	BL	1.70645	8	6.39279
Trial 8	6.3	Rep	F	0:00:00.532-0:00:00.798	BL	1.12903	8	4.22962
Trial 8	6.3	Rep	F	0:00:00.798-0:00:01.064	BL	1.00411	8	3.76165
Trial 8	6.3	Rep	F	0:00:01.064-0:00:01.330	BL	0.79101	8	2.96331
Trial 8	6.3	Rep	F	0:00:01.330-0:00:01.596	BL	1.03734	8	3.88614
Trial 8	6.3	Rep	F	0:00:01.596-0:00:01.862	BL	0.475733	8	1.78221
Trial 8	6.3	Rep	F	0:00:01.862-0:00:02.128	BL	0.461614	8	1.72932
Trial 8	6.3	Rep	F	0:00:02.128-0:00:02.394	BL	0.317537	8	1.18957
Trial 8	6.3	Rep	F	0:00:02.394-0:00:02.660	BL	0.280948	8	1.05249
Trial 8	6.3	Rep	F	0:00:02.660-0:00:02.926	BL	0.484188	8	1.81389
Trial 8	6.3	Rep	F	0:00:02.926-0:00:03.192	BL	0.586815	8	2.19835
Trial 8	6.3	Rep	F	0:00:03.192-0:00:03.458	BL	1.26912	8	4.75445
Trial 8	6.3	Rep	F	0:00:03.458-0:00:03.724	BL	0.752101	8	2.81756
Trial 8	6.3	Rep	F	0:00:03.724-0:00:03.990	BL	0.408604	8	1.53073
Trial 8	6.3	Rep	F	0:00:03.990-0:00:04.256	BL	0.669762	8	2.5091
Trial 8	6.3	Rep	F	0:00:04.256-0:00:04.522	BL	0.484744	8	1.81596
Trial 8	6.3	Rep	F	0:00:04.522-0:00:04.788	BL	1.12033	8	4.19702
Trial 8	6.3	Rep	F	0:00:04.788-0:00:05.054	BL	2.63266	8	9.86261
Trial 8	6.3	Rep	F	0:00:05.054-0:00:05.320	BL	2.59812	8	9.73324
Trial 8	6.3	Rep	F	0:00:05.320-0:00:05.586	BL	1.27708	8	4.78425
Trial 8	6.3	Rep	F	0:00:05.586-0:00:05.852	BL	0.422055	8	1.58112
Trial 8	6.3	Rep	F	0:00:05.852-0:00:06.118	BL	2.60756	8	9.76854
Trial 8	6.3	Rep	F	0:00:06.118-0:00:06.384	BL	3.11598	8	11.6732
Trial 8	6.3	Rep	F	0:00:06.384-0:00:06.650	BL	1.99636	8	7.47888
Trial 8	6.3	Rep	F	0:00:06.650-0:00:06.916	BL	1.3061	8	4.893
Trial 8	6.3	Rep	F	0:00:06.916-0:00:07.182	BL	0.551283	8	2.06524
Trial 8	6.3	Rep	F	0:00:07.182-0:00:07.448	BL	0.244889	8	0.917416
Trial 8	6.3	Rep	F	0:00:07.448-0:00:07.714	BL	0.350283	8	1.31224
Trial 8	6.3	Rep	F	0:00:07.714-0:00:07.980	BL	0.649284	8	2.43238
Trial 8	6.3	Rep	F	0:00:07.980-0:00:08.246	BL	0.768879	8	2.88042
Trial 8	6.3	Rep	F	0:00:08.246-0:00:08.512	BL	2.82926	8	10.5991
Trial 8	6.3	Rep	F	0:00:08.512-0:00:08.778	BL	4.3653	8	16.3535
Trial 8	6.3	Rep	F	0:00:08.778-0:00:09.044	BL	3.21569	8	12.0468
Trial 8	6.3	Rep	F	0:00:09.044-0:00:09.310	BL	1.62323	8	6.081
Trial 8	6.3	Rep	F	0:00:09.310-0:00:09.576	BL	1.79852	7	7.70022
Trial 8	6.3	Rep	F	0:00:09.576-0:00:09.842	BL	1.56083	8	5.84726
Trial 8	6.3	Rep	F	0:00:09.842-0:00:10.108	BL	2.73807	8	10.2575
Trial 8	6.3	Rep	F	0:00:10.108-0:00:10.374	BL	3.17648	8	11.8998
Trial 8	6.3	Rep	F	0:00:10.374-0:00:10.640	BL	2.12423	8	7.9579
Trial 8	6.3	Rep	F	0:00:10.640-0:00:10.906	BL	0.900297	8	3.37273
Trial 8	6.3	Rep	F	0:00:10.906-0:00:11.172	BL	0.982484	8	3.68065
Trial 8	6.3	Rep	F	0:00:11.172-0:00:11.438	BL	0.78094	8	2.92559
Trial 8	6.3	Rep	F	0:00:11.438-0:00:11.704	BL	1.29833	8	4.86389
Trial 8	6.3	Rep	F	0:00:11.704-0:00:11.970	BL	0.358643	8	1.34357
Trial 8	6.3	Rep	F	0:00:11.970-0:00:12.236	BL	0.645431	8	2.41793
Trial 8	6.3	Rep	F	0:00:12.236-0:00:12.502	BL	0.860452	8	3.22348
Trial 8	6.3	Rep	F	0:00:12.502-0:00:12.768	BL	1.13455	8	4.25032
Trial 8	6.3	Rep	F	0:00:12.768-0:00:13.034	BL	0.549037	8	2.05682
Trial 8	6.3	Rep	F	0:00:13.034-0:00:13.300	BL	0.657489	8	2.46312
Trial 8	6.3	Rep	F	0:00:13.300-0:00:13.566	BL	0.856285	8	3.20785
Trial 8	6.3	Rep	F	0:00:13.566-0:00:13.832	BL	3.14148	8	11.7688
Trial 8	6.3	Rep	F	0:00:13.832-0:00:14.098	BL	1.14899	8	4.30439
Trial 8	6.3	Rep	F	0:00:14.098-0:00:14.364	BL	4.1219	8	15.4416
Trial 8	6.3	Rep	F	0:00:14.364-0:00:14.630	BL	1.78627	8	6.69185
Trial 8	6.3	Rep	F	0:00:14.630-0:00:14.896	BL	0.994545	8	3.72583
Trial 8	6.3	Rep	F	0:00:14.896-0:00:15.162	BL	1.71977	8	6.44273
Trial 8	6.3	Rep	F	0:00:15.162-0:00:15.428	BL	1.33608	8	5.00528
Trial 8	6.3	Rep	F	0:00:15.428-0:00:15.694	BL	2.7913	8	10.457
Trial 8	6.3	Rep	F	0:00:15.694-0:00:15.960	BL	2.67065	8	10.005
Trial 8	6.3	Rep	F	0:00:15.960-0:00:16.226	BL	1.46081	8	5.47253
Trial 8	6.3	Rep	F	0:00:16.226-0:00:16.492	BL	1.27643	8	4.78183
Trial 8	6.3	Rep	F	0:00:16.492-0:00:16.758	BL	0.911648	8	3.41527
Trial 8	6.3	Rep	F	0:00:16.758-0:00:17.024	BL	1.87706	8	7.03192
Trial 8	6.3	Rep	F	0:00:17.024-0:00:17.290	BL	1.67752	8	6.28442
Trial 8	6.3	Rep	F	0:00:17.290-0:00:17.556	BL	1.98629	8	7.44111
Trial 8	6.3	Rep	F	0:00:17.556-0:00:17.822	BL	1.55996	8	5.84404
Trial 8	6.3	Rep	F	0:00:17.822-0:00:18.088	BL	2.38858	8	8.94821
Trial 8	6.3	Rep	F	0:00:18.088-0:00:18.354	BL	2.83707	8	10.6283
Trial 8	6.3	Rep	F	0:00:18.354-0:00:18.620	BL	2.1619	8	8.09905
Trial 8	6.3	Rep	F	0:00:18.620-0:00:18.886	BL	2.78408	8	10.4298
Trial 8	6.3	Rep	F	0:00:18.886-0:00:19.152	BL	2.17983	7	9.33277
Trial 8	6.3	Rep	F	0:00:19.152-0:00:19.418	BL	1.12333	8	4.20829
Trial 8	6.3	Rep	F	0:00:19.418-0:00:19.684	BL	1.88756	8	7.07125
Trial 8	6.3	Rep	F	0:00:19.684-0:00:19.950	BL	1.21696	8	4.55904
Trial 8	6.3	Rep	F	0:00:19.950-0:00:20.216	BL	0.35971	8	1.34756
Trial 8	6.3	Rep	F	0:00:20.216-0:00:20.482	BL	0.408229	8	1.52932
Trial 8	6.3	Rep	F	0:00:20.482-0:00:20.748	BL	0.429736	8	1.6099
Trial 8	6.3	Rep	F	0:00:20.748-0:00:21.014	BL	0.545989	8	2.04542
Trial 8	6.3	Rep	F	0:00:21.014-0:00:21.280	BL	0.233212	8	0.873667
Trial 8	6.3	Rep	F	0:00:21.280-0:00:21.546	BL	1.25371	8	4.69672
Trial 8	6.3	Rep	F	0:00:21.546-0:00:21.812	BL	0.35793	8	1.34089
Trial 8	6.3	Rep	F	0:00:21.812-0:00:22.078	BL	0.206526	8	0.773704
Trial 8	6.3	Rep	F	0:00:22.078-0:00:22.344	BL	0.760006	8	2.84718
Trial 8	6.3	Rep	F	0:00:22.344-0:00:22.610	BL	0.526956	8	1.97412
Trial 8	6.3	Rep	F	0:00:22.610-0:00:22.876	BL	0.705337	8	2.64236
Trial 8	6.3	Rep	F	0:00:22.876-0:00:23.142	BL	0.844771	8	3.16471
Trial 8	6.3	Rep	F	0:00:23.142-0:00:23.408	BL	1.30231	8	4.87879
Trial 8	6.3	Rep	F	0:00:23.408-0:00:23.674	BL	2.46657	8	9.24038
Trial 8	6.3	Rep	F	0:00:23.674-0:00:23.940	BL	3.38021	8	12.6631
Trial 8	6.3	Rep	F	0:00:23.940-0:00:24.206	BL	3.15276	8	11.811
Trial 8	6.3	Rep	F	0:00:24.206-0:00:24.472	BL	3.02549	8	11.3342
Trial 8	6.3	Rep	F	0:00:24.472-0:00:24.738	BL	2.76016	8	10.3403
Trial 8	6.3	Rep	F	0:00:24.738-0:00:25.004	BL	2.5096	8	9.40157
Trial 8	6.3	Rep	F	0:00:25.004-0:00:25.270	BL	1.92358	8	7.20624
Trial 8	6.3	Rep	F	0:00:25.270-0:00:25.536	BL	0.941836	8	3.52834
Trial 8	6.3	Rep	F	0:00:25.536-0:00:25.802	BL	0.437125	8	1.63758
Trial 8	6.3	Rep	F	0:00:25.802-0:00:26.068	BL	0.264201	8	0.989768
Trial 8	6.3	Rep	F	0:00:26.068-0:00:26.334	BL	0.786508	8	2.94646
Trial 8	6.3	Rep	F	0:00:26.334-0:00:26.600	BL	0.819143	8	3.06872
Trial 8	6.3	Rep	F	0:00:26.600-0:00:26.866	BL	0.889186	8	3.33112
Trial 8	6.3	Rep	F	0:00:26.866-0:00:27.132	BL	1.41724	8	5.3093
Trial 8	6.3	Rep	F	0:00:27.132-0:00:27.398	BL	1.5713	8	5.88653
Trial 8	6.3	Rep	F	0:00:27.398-0:00:27.664	BL	1.82955	8	6.85394
Trial 8	6.3	Rep	F	0:00:27.664-0:00:27.930	BL	1.69784	8	6.36054
Trial 8	6.3	Rep	F	0:00:27.930-0:00:28.196	BL	0.825957	8	3.09424
Trial 8	6.3	Rep	F	0:00:28.196-0:00:28.462	BL	1.10165	8	4.12704
Trial 8	6.3	Rep	F	0:00:28.462-0:00:28.728	BL	0.679739	7	2.91026
Trial 8	6.3	Rep	F	0:00:28.728-0:00:28.994	BL	0.990589	8	3.711
Trial 8	6.3	Rep	F	0:00:28.994-0:00:29.260	BL	1.27833	8	4.78892
Trial 8	6.3	Rep	F	0:00:29.260-0:00:29.526	BL	1.38689	8	5.19568
Trial 8	6.3	Rep	F	0:00:29.526-0:00:29.792	BL	0.643323	8	2.41004
Trial 8	6.3	Rep	F	0:00:29.792-0:00:30.058	BL	0.446301	8	1.67195
Trial 8	6.3	Rep	F	0:00:30.058-0:00:30.324	BL	0.354257	8	1.32714
Trial 8	6.3	Rep	F	0:00:30.324-0:00:30.590	BL	0.489597	8	1.83416
Trial 8	6.3	Rep	F	0:00:30.590-0:00:30.856	BL	1.5593	8	5.84152
Trial 8	6.3	Rep	F	0:00:30.856-0:00:31.122	BL	0.495212	8	1.85518
Trial 8	6.3	Rep	F	0:00:31.122-0:00:31.388	BL	0.432593	8	1.62059
Trial 8	6.3	Rep	F	0:00:31.388-0:00:31.654	BL	0.543183	8	2.0349
Trial 8	6.3	Rep	F	0:00:31.654-0:00:31.920	BL	0.632361	8	2.36898
Trial 8	6.3	Rep	F	0:00:31.920-0:00:32.186	BL	1.36538	8	5.11508
Trial 8	6.3	Rep	F	0:00:32.186-0:00:32.452	BL	3.21842	8	12.057
Trial 8	6.3	Rep	F	0:00:32.452-0:00:32.718	BL	3.71917	8	13.9329
Trial 8	6.3	Rep	F	0:00:32.718-0:00:32.984	BL	2.61285	8	9.78842
Trial 8	6.3	Rep	F	0:00:32.984-0:00:33.250	BL	3.5646	8	13.3539
Trial 8	6.3	Rep	F	0:00:33.250-0:00:33.516	BL	3.70343	8	13.874
Trial 8	6.3	Rep	F	0:00:33.516-0:00:33.782	BL	0.718358	8	2.69114
Trial 8	6.3	Rep	F	0:00:33.782-0:00:34.048	BL	0.760145	8	2.84769
Trial 8	6.3	Rep	F	0:00:34.048-0:00:34.314	BL	0.496403	8	1.85966
Trial 8	6.3	Rep	F	0:00:34.314-0:00:34.580	BL	0.53632	8	2.00918
Trial 8	6.3	Rep	F	0:00:34.580-0:00:34.846	BL	0.532414	8	1.99456
Trial 8	6.3	Rep	F	0:00:34.846-0:00:35.112	BL	0.205978	8	0.771647
Trial 8	6.3	Rep	F	0:00:35.112-0:00:35.378	BL	0.307463	8	1.15184
Trial 8	6.3	Rep	F	0:00:35.378-0:00:35.644	BL	0.191999	8	0.719281
Trial 8	6.3	Rep	F	0:00:35.644-0:00:35.910	BL	0.70366	8	2.63608
Trial 8	6.3	Rep	F	0:00:35.910-0:00:36.176	BL	0.662593	8	2.48224
Trial 8	6.3	Rep	F	0:00:36.176-0:00:36.442	BL	0.576936	8	2.16134
Trial 8	6.3	Rep	F	0:00:36.442-0:00:36.708	BL	2.07792	8	7.78439
Trial 8	6.3	Rep	F	0:00:36.708-0:00:36.974	BL	1.60938	8	6.02914
Trial 8	6.3	Rep	F	0:00:36.974-0:00:37.240	BL	1.56862	8	5.87646
Trial 8	6.3	Rep	F	0:00:37.240-0:00:37.506	BL	1.53747	8	5.75978
Trial 8	6.3	Rep	F	0:00:37.506-0:00:37.772	BL	1.41736	8	5.30977
Trial 8	6.3	Rep	F	0:00:37.772-0:00:38.038	BL	1.58251	7	6.77541
Trial 8	6.3	Rep	F	0:00:38.038-0:00:38.304	BL	1.21068	8	4.53552
Trial 8	6.3	Rep	F	0:00:38.304-0:00:38.570	BL	1.72556	8	6.46436
Trial 8	6.3	Rep	F	0:00:38.570-0:00:38.836	BL	2.82523	8	10.584
Trial 8	6.3	Rep	F	0:00:38.836-0:00:39.102	BL	0.753203	8	2.8217
Trial 8	6.3	Rep	F	0:00:39.102-0:00:39.368	BL	1.16778	8	4.37477
Trial 8	6.3	Rep	F	0:00:39.368-0:00:39.634	BL	0.691078	8	2.58895
Trial 8	6.3	Rep	F	0:00:39.634-0:00:39.900	BL	0.2961	8	1.10926
Trial 8	6.3	Rep	F	0:00:39.900-0:00:40.166	BL	0.388858	8	1.45675
Trial 8	6.3	Rep	F	0:00:40.166-0:00:40.432	BL	0.179063	8	0.670818
Trial 8	6.3	Rep	F	0:00:40.432-0:00:40.698	BL	0.379226	8	1.42067
Trial 8	6.3	Rep	F	0:00:40.698-0:00:40.964	BL	0.336654	8	1.2612
Trial 8	6.3	Rep	F	0:00:40.964-0:00:41.230	BL	0.389481	8	1.4591
Trial 8	6.3	Rep	F	0:00:41.230-0:00:41.496	BL	0.471706	8	1.76713
Trial 8	6.3	Rep	F	0:00:41.496-0:00:41.762	BL	0.671539	8	2.51575
Trial 8	6.3	Rep	F	0:00:41.762-0:00:42.028	BL	0.538401	8	2.01698
Trial 8	6.3	Rep	F	0:00:42.028-0:00:42.294	BL	0.977562	8	3.6622
Trial 8	6.3	Rep	F	0:00:42.294-0:00:42.560	BL	1.23881	8	4.64087
Trial 8	6.3	Rep	F	0:00:42.560-0:00:42.826	BL	2.31632	8	8.67753
Trial 8	6.3	Rep	F	0:00:42.826-0:00:43.092	BL	2.25378	8	8.44321
Trial 8	6.3	Rep	F	0:00:43.092-0:00:43.358	BL	3.7622	8	14.0941
Trial 8	6.3	Rep	F	0:00:43.358-0:00:43.624	BL	0.765713	8	2.86855
Trial 8	6.3	Rep	F	0:00:43.624-0:00:43.890	BL	1.40151	8	5.2504
Trial 8	6.3	Rep	F	0:00:43.890-0:00:44.156	BL	1.47803	8	5.53707
Trial 8	6.3	Rep	F	0:00:44.156-0:00:44.422	BL	2.24376	8	8.40571
Trial 8	6.3	Rep	F	0:00:44.422-0:00:44.688	BL	1.87234	8	7.01427
Trial 8	6.3	Rep	F	0:00:44.688-0:00:44.954	BL	0.77578	8	2.90628
Trial 8	6.3	Rep	F	0:00:44.954-0:00:45.220	BL	0.500189	8	1.87383
Trial 8	6.3	Rep	F	0:00:45.220-0:00:45.486	BL	0.500189	8	1.87383
Trial 8	6.3	Rep	F	0:00:45.486-0:00:45.752	BL	0.500189	8	1.87384
Trial 8	6.3	Rep	F	0:00:45.752-0:00:46.018	BL	0.500189	8	1.87383
Trial 8	6.3	Rep	F	0:00:46.018-0:00:46.284	BL	0.825063	8	3.0909
Trial 8	6.3	Rep	F	0:00:46.284-0:00:46.550	BL	3.07006	8	11.5012
Trial 8	6.3	Rep	F	0:00:46.550-0:00:46.816	BL	2.7956	8	10.473
Trial 8	6.3	Rep	F	0:00:46.816-0:00:47.082	BL	1.81846	8	6.81241
Trial 8	6.3	Rep	F	0:00:47.082-0:00:47.348	BL	2.51332	8	9.4155
Trial 8	6.3	Rep	F	0:00:47.348-0:00:47.614	BL	2.07766	7	8.89535
Trial 8	6.3	Rep	F	0:00:47.614-0:00:47.880	BL	3.82349	8	14.3238
Trial 8	6.3	Rep	F	0:00:47.880-0:00:48.146	BL	3.90966	8	14.6465
Trial 8	6.3	Rep	F	0:00:48.146-0:00:48.412	BL	0.823913	8	3.08658
Trial 8	6.3	Rep	F	0:00:48.412-0:00:48.678	BL	0.370126	8	1.38659
Trial 8	6.3	Rep	F	0:00:48.678-0:00:48.944	BL	1.18377	8	4.43471
Trial 8	6.3	Rep	F	0:00:48.944-0:00:49.210	BL	0.536371	8	2.00939
Trial 8	6.3	Rep	F	0:00:49.210-0:00:49.476	BL	0.813369	8	3.04708
Trial 8	6.3	Rep	F	0:00:49.476-0:00:49.742	BL	2.40469	8	9.00857
Trial 8	6.3	Rep	F	0:00:49.742-0:00:50.008	BL	1.86535	8	6.98807
Trial 8	6.3	Rep	F	0:00:50.008-0:00:50.274	BL	0.817274	8	3.06171
Trial 8	6.3	Rep	F	0:00:50.274-0:00:50.540	BL	0.899717	8	3.37057
Trial 8	6.3	Rep	F	0:00:50.540-0:00:50.806	BL	1.06695	8	3.99704
Trial 8	6.3	Rep	F	0:00:50.806-0:00:51.072	BL	0.997011	8	3.73505
Trial 8	6.3	Rep	F	0:00:51.072-0:00:51.338	BL	0.323169	8	1.21068
Trial 8	6.3	Rep	F	0:00:51.338-0:00:51.604	BL	0.522139	8	1.95606
Trial 8	6.3	Rep	F	0:00:51.604-0:00:51.870	BL	1.22063	8	4.57279
Trial 8	6.3	Rep	F	0:00:51.870-0:00:52.136	BL	1.25453	8	4.69978
Trial 8	6.3	Rep	F	0:00:52.136-0:00:52.402	BL	0.462931	8	1.73425
Trial 8	6.3	Rep	F	0:00:52.402-0:00:52.668	BL	1.64401	8	6.15886
Trial 8	6.3	Rep	F	0:00:52.668-0:00:52.934	BL	0.648215	8	2.42837
Trial 8	6.3	Rep	F	0:00:52.934-0:00:53.200	BL	0.206429	8	0.773338
Trial 8	6.3	Rep	F	0:00:53.200-0:00:53.466	BL	0.590915	8	2.21371
Trial 8	6.3	Rep	F	0:00:53.466-0:00:53.732	BL	0.359592	8	1.34712
Trial 8	6.3	Rep	F	0:00:53.732-0:00:53.998	BL	0.827335	8	3.0994
Trial 8	6.3	Rep	F	0:00:53.998-0:00:54.264	BL	0.3982	8	1.49175
Trial 8	6.3	Rep	F	0:00:54.264-0:00:54.530	BL	0.956429	8	3.58303
Trial 8	6.3	Rep	F	0:00:54.530-0:00:54.796	BL	0.574548	8	2.1524
Trial 8	6.3	Rep	F	0:00:54.796-0:00:55.062	BL	0.210713	8	0.78938
Trial 8	6.3	Rep	F	0:00:55.062-0:00:55.328	BL	0.244945	8	0.917628
Trial 8	6.3	Rep	F	0:00:55.328-0:00:55.594	BL	0.85409	8	3.19962
Trial 8	6.3	Rep	F	0:00:55.594-0:00:55.860	BL	0.84244	8	3.156
Trial 8	6.3	Rep	F	0:00:55.860-0:00:56.126	BL	0.440669	8	1.65085
Trial 8	6.3	Rep	F	0:00:56.126-0:00:56.392	BL	0.875673	8	3.28048
Trial 8	6.3	Rep	F	0:00:56.392-0:00:56.658	BL	0.644308	8	2.41374
Trial 8	6.3	Rep	F	0:00:56.658-0:00:56.924	BL	1.83233	8	6.86438
Trial 8	6.3	Rep	F	0:00:56.924-0:00:57.190	BL	0.825868	7	3.53589
Trial 8	6.3	Rep	F	0:00:57.190-0:00:57.456	BL	0.285182	8	1.06837
Trial 8	6.3	Rep	F	0:00:57.456-0:00:57.722	BL	1.50727	8	5.64659
Trial 8	6.3	Rep	F	0:00:57.722-0:00:57.988	BL	2.25926	8	8.46377
Trial 8	6.3	Rep	F	0:00:57.988-0:00:58.254	BL	0.409389	8	1.53367
Trial 8	6.3	Rep	F	0:00:58.254-0:00:58.520	BL	0.75574	8	2.83118
Trial 8	6.3	Rep	F	0:00:58.520-0:00:58.786	BL	2.42727	8	9.09318
Trial 8	6.3	Rep	F	0:00:58.786-0:00:59.052	BL	2.66663	8	9.98985
Trial 8	6.3	Rep	F	0:00:59.052-0:00:59.318	BL	3.3835	8	12.6754
Trial 8	6.3	Rep	F	0:00:59.318-0:00:59.584	BL	2.10231	8	7.87576
Trial 8	6.3	Rep	F	0:00:59.584-0:00:59.850	BL	0.438739	8	1.64362
Trial 8	6.3	Rep	F	0:00:59.850-0:01:00.116	BL	0.350565	8	1.31331
Trial 8	6.3	Rep	F	0:01:00.116-0:01:00.382	BL	0.899341	8	3.36915
Trial 8	6.3	Rep	F	0:01:00.382-0:01:00.648	BL	0.430997	8	1.61463
Trial 8	6.3	Rep	F	0:01:00.648-0:01:00.914	BL	0.266872	8	0.999764
Trial 8	6.3	Rep	F	0:01:00.914-0:01:01.180	BL	0.297451	8	1.11433
Trial 8	6.3	Rep	F	0:01:01.180-0:01:01.446	BL	0.872739	8	3.2695
Trial 8	6.3	Rep	F	0:01:01.446-0:01:01.712	BL	1.22808	8	4.6007
Trial 8	6.3	Rep	F	0:01:01.712-0:01:01.978	BL	1.44899	8	5.42827
Trial 8	6.3	Rep	F	0:01:01.978-0:01:02.244	BL	0.467146	8	1.75004
Trial 8	6.3	Rep	F	0:01:02.244-0:01:02.510	BL	0.185672	8	0.695571
Trial 8	6.3	Rep	F	0:01:02.510-0:01:02.776	BL	1.23399	8	4.62285
Trial 8	6.3	Rep	F	0:01:02.776-0:01:03.042	BL	1.77118	8	6.63527
Trial 8	6.3	Rep	F	0:01:03.042-0:01:03.308	BL	1.0332	8	3.87061
Trial 8	6.3	Rep	F	0:01:03.308-0:01:03.574	BL	0.845887	8	3.16889
Trial 8	6.3	Rep	F	0:01:03.574-0:01:03.840	BL	1.47662	8	5.53178
Trial 8	6.3	Rep	F	0:01:03.840-0:01:04.106	BL	1.29781	8	4.86193
Trial 8	6.3	Rep	F	0:01:04.106-0:01:04.372	BL	0.625323	8	2.34262
Trial 8	6.3	Rep	F	0:01:04.372-0:01:04.638	BL	0.310046	8	1.16151
Trial 8	6.3	Rep	F	0:01:04.638-0:01:04.904	BL	0.484343	8	1.81448
Trial 8	6.3	Rep	F	0:01:04.904-0:01:05.170	BL	1.59795	8	5.98629
Trial 8	6.3	Rep	F	0:01:05.170-0:01:05.436	BL	2.36411	8	8.85657
Trial 8	6.3	Rep	F	0:01:05.436-0:01:05.702	BL	1.97615	8	7.40316
Trial 8	6.3	Rep	F	0:01:05.702-0:01:05.968	BL	1.14072	8	4.27345
Trial 8	6.3	Rep	F	0:01:05.968-0:01:06.234	BL	0.697037	8	2.61126
Trial 8	6.3	Rep	F	0:01:06.234-0:01:06.500	BL	0.732875	8	2.74553
Trial 8	6.3	Rep	F	0:01:06.500-0:01:06.766	BL	0.414926	7	1.77648
Trial 8	6.3	Rep	F	0:01:06.766-0:01:07.032	BL	0.763786	8	2.86134
Trial 8	6.3	Rep	F	0:01:07.032-0:01:07.298	BL	1.05947	8	3.96903
Trial 8	6.3	Rep	F	0:01:07.298-0:01:07.564	BL	1.02616	8	3.84426
Trial 8	6.3	Rep	F	0:01:07.564-0:01:07.830	BL	1.67747	8	6.28421
Trial 8	6.3	Rep	F	0:01:07.830-0:01:08.096	BL	2.96231	8	11.0975
Trial 8	6.3	Rep	F	0:01:08.096-0:01:08.362	BL	1.62979	8	6.10562
Trial 8	6.3	Rep	F	0:01:08.362-0:01:08.628	BL	0.563791	8	2.1121
Trial 8	6.3	Rep	F	0:01:08.628-0:01:08.894	BL	0.922879	8	3.45734
Trial 8	6.3	Rep	F	0:01:08.894-0:01:09.160	BL	1.45418	8	5.4477
Trial 8	6.3	Rep	F	0:01:09.160-0:01:09.426	BL	3.02779	8	11.3428
Trial 8	6.3	Rep	F	0:01:09.426-0:01:09.692	BL	1.92206	8	7.20055
Trial 8	6.3	Rep	F	0:01:09.692-0:01:09.958	BL	0.484479	8	1.81498
Trial 8	6.3	Rep	F	0:01:09.958-0:01:10.224	BL	0.561685	8	2.10422
Trial 8	6.3	Rep	F	0:01:10.224-0:01:10.490	BL	0.695619	8	2.60597
Trial 8	6.3	Rep	F	0:01:10.490-0:01:10.756	BL	0.6097	8	2.28408
Trial 8	6.3	Rep	F	0:01:10.756-0:01:11.022	BL	1.59158	8	5.96246
Trial 8	6.3	Rep	F	0:01:11.022-0:01:11.288	BL	2.09632	8	7.85335
Trial 8	6.3	Rep	F	0:01:11.288-0:01:11.554	BL	1.05703	8	3.9599
Trial 8	6.3	Rep	F	0:01:11.554-0:01:11.820	BL	1.61815	8	6.06198
Trial 8	6.3	Rep	F	0:01:11.820-0:01:12.086	BL	3.1287	8	11.7209
Trial 8	6.3	Rep	F	0:01:12.086-0:01:12.352	BL	1.55786	8	5.83616
Trial 8	6.3	Rep	F	0:01:12.352-0:01:12.618	BL	1.5164	8	5.68081
Trial 8	6.3	Rep	F	0:01:12.618-0:01:12.884	BL	0.648635	8	2.42996
Trial 8	6.3	Rep	F	0:01:12.884-0:01:13.150	BL	0.364294	8	1.36474
Trial 8	6.3	Rep	F	0:01:13.150-0:01:13.416	BL	0.243734	8	0.91309
Trial 8	6.3	Rep	F	0:01:13.416-0:01:13.682	BL	0.430577	8	1.61305
Trial 8	6.3	Rep	F	0:01:13.682-0:01:13.948	BL	0.222792	8	0.834637
Trial 8	6.3	Rep	F	0:01:13.948-0:01:14.214	BL	0.172773	8	0.647251
Trial 8	6.3	Rep	F	0:01:14.214-0:01:14.480	BL	0.596044	8	2.23293
Trial 8	6.3	Rep	F	0:01:14.480-0:01:14.746	BL	2.49907	8	9.36215
Trial 8	6.3	Rep	F	0:01:14.746-0:01:15.012	BL	0.711258	8	2.66456
Trial 8	6.3	Rep	F	0:01:15.012-0:01:15.278	BL	0.992306	8	3.71743
Trial 8	6.3	Rep	F	0:01:15.278-0:01:15.544	BL	1.13298	8	4.24442
Trial 8	6.3	Rep	F	0:01:15.544-0:01:15.810	BL	3.65781	8	13.7031
Trial 8	6.3	Rep	F	0:01:15.810-0:01:16.076	BL	4.40063	7	18.841
Trial 8	6.3	Rep	F	0:01:16.076-0:01:16.342	BL	3.76016	8	14.0865
Trial 8	6.3	Rep	F	0:01:16.342-0:01:16.608	BL	1.43909	8	5.39116
Trial 8	6.3	Rep	F	0:01:16.608-0:01:16.874	BL	0.832733	8	3.11963
Trial 8	6.3	Rep	F	0:01:16.874-0:01:17.140	BL	0.193853	8	0.726226
Trial 8	6.3	Rep	F	0:01:17.140-0:01:17.406	BL	0.346119	8	1.29665
Trial 8	6.3	Rep	F	0:01:17.406-0:01:17.672	BL	0.671176	8	2.5144
Trial 8	6.3	Rep	F	0:01:17.672-0:01:17.938	BL	0.235171	8	0.88101
Trial 8	6.3	Rep	F	0:01:17.938-0:01:18.204	BL	0.36657	8	1.37326
Trial 8	6.3	Rep	F	0:01:18.204-0:01:18.470	BL	0.437372	8	1.63851
Trial 8	6.3	Rep	F	0:01:18.470-0:01:18.736	BL	1.83514	8	6.87491
Trial 8	6.3	Rep	F	0:01:18.736-0:01:19.002	BL	1.11742	8	4.18612
Trial 8	6.3	Rep	F	0:01:19.002-0:01:19.268	BL	1.10339	8	4.13358
Trial 8	6.3	Rep	F	0:01:19.268-0:01:19.534	BL	0.691038	8	2.5888
Trial 8	6.3	Rep	F	0:01:19.534-0:01:19.800	BL	1.81067	8	6.78324
Trial 8	6.3	Rep	F	0:01:19.800-0:01:20.066	BL	1.94359	8	7.28116
Trial 8	6.3	Rep	F	0:01:20.066-0:01:20.332	BL	1.38639	8	5.19376
Trial 8	6.3	Rep	F	0:01:20.332-0:01:20.598	BL	2.18434	8	8.18307
Trial 8	6.3	Rep	F	0:01:20.598-0:01:20.864	BL	2.12434	8	7.95829
Trial 8	6.3	Rep	F	0:01:20.864-0:01:21.130	BL	2.27741	8	8.53177
Trial 8	6.3	Rep	F	0:01:21.130-0:01:21.396	BL	0.356999	8	1.3374
Trial 8	6.3	Rep	F	0:01:21.396-0:01:21.662	BL	0.282723	8	1.05915
Trial 8	6.3	Rep	F	0:01:21.662-0:01:21.928	BL	0.608415	8	2.27927
Trial 8	6.3	Rep	F	0:01:21.928-0:01:22.194	BL	0.553236	8	2.07256
Trial 8	6.3	Rep	F	0:01:22.194-0:01:22.460	BL	5.16632	8	19.3545
Trial 8	6.3	Rep	F	0:01:22.460-0:01:22.726	BL	0.817308	8	3.06183
Trial 8	6.3	Rep	F	0:01:22.726-0:01:22.992	BL	0.564366	8	2.11426
Trial 8	6.3	Rep	F	0:01:22.992-0:01:23.258	BL	1.62258	8	6.07857
Trial 8	6.3	Rep	F	0:01:23.258-0:01:23.524	BL	0.584662	8	2.19028
Trial 8	6.3	Rep	F	0:01:23.524-0:01:23.790	BL	0.468561	8	1.75535
Trial 8	6.3	Rep	F	0:01:23.790-0:01:24.056	BL	1.4699	8	5.50658
Trial 8	6.3	Rep	F	0:01:24.056-0:01:24.322	BL	3.14681	8	11.7887
Trial 8	6.3	Rep	F	0:01:24.322-0:01:24.588	BL	3.03704	8	11.3775
Trial 8	6.3	Rep	F	0:01:24.588-0:01:24.854	BL	1.68766	8	6.3224
Trial 8	6.3	Rep	F	0:01:24.854-0:01:25.120	BL	0.32933	8	1.23375
Trial 8	6.3	Rep	F	0:01:25.120-0:01:25.386	BL	0.538622	8	2.01781
Trial 8	6.3	Rep	F	0:01:25.386-0:01:25.652	BL	0.264117	7	1.1308
Trial 8	6.3	Rep	F	0:01:25.652-0:01:25.918	BL	0.438506	8	1.64276
Trial 8	6.3	Rep	F	0:01:25.918-0:01:26.184	BL	1.38247	8	5.17908
Trial 8	6.3	Rep	F	0:01:26.184-0:01:26.450	BL	1.45438	8	5.44848
Trial 8	6.3	Rep	F	0:01:26.450-0:01:26.716	BL	1.4521	8	5.43993
Trial 8	6.3	Rep	F	0:01:26.716-0:01:26.982	BL	1.81503	8	6.79953
Trial 8	6.3	Rep	F	0:01:26.982-0:01:27.248	BL	1.28377	8	4.80934
Trial 8	6.3	Rep	F	0:01:27.248-0:01:27.514	BL	0.377332	8	1.41358
Trial 8	6.3	Rep	F	0:01:27.514-0:01:27.780	BL	0.831101	8	3.11352
Trial 8	6.3	Rep	F	0:01:27.780-0:01:28.046	BL	0.942402	8	3.53048
Trial 8	6.3	Rep	F	0:01:28.046-0:01:28.312	BL	1.06608	8	3.99379
Trial 8	6.3	Rep	F	0:01:28.312-0:01:28.578	BL	0.317746	8	1.19036
Trial 8	6.3	Rep	F	0:01:28.578-0:01:28.844	BL	0.658902	8	2.46841
Trial 8	6.3	Rep	F	0:01:28.844-0:01:29.110	BL	0.852812	8	3.19484
Trial 8	6.3	Rep	F	0:01:29.110-0:01:29.376	BL	2.16905	8	8.12582
Trial 8	6.3	Rep	F	0:01:29.376-0:01:29.642	BL	1.47564	8	5.52809
Trial 8	6.3	Rep	F	0:01:29.642-0:01:29.908	BL	0.469811	8	1.76003
Trial 8	6.3	Rep	F	0:01:29.908-0:01:30.174	BL	1.38515	8	5.18913
Trial 8	6.3	Rep	F	0:01:30.174-0:01:30.440	BL	1.39173	8	5.21377
Trial 8	6.3	Rep	F	0:01:30.440-0:01:30.706	BL	0.678896	8	2.54332
Trial 8	6.3	Rep	F	0:01:30.706-0:01:30.972	BL	0.350724	8	1.3139
Trial 8	6.3	Rep	F	0:01:30.972-0:01:31.238	BL	0.108558	8	0.406685
Trial 8	6.3	Rep	F	0:01:31.238-0:01:31.504	BL	1.72021	8	6.44432
Trial 8	6.3	Rep	F	0:01:31.504-0:01:31.770	BL	1.72964	8	6.47967
Trial 8	6.3	Rep	F	0:01:31.770-0:01:32.036	BL	0.568738	8	2.13064
Trial 8	6.3	Rep	F	0:01:32.036-0:01:32.302	BL	0.549293	8	2.05779
Trial 8	6.3	Rep	F	0:01:32.302-0:01:32.568	BL	0.400622	8	1.50083
Trial 8	6.3	Rep	F	0:01:32.568-0:01:32.834	BL	0.277872	8	1.04098
Trial 8	6.3	Rep	F	0:01:32.834-0:01:33.100	BL	0.0971677	8	0.364012
Trial 8	6.3	Rep	F	0:01:33.100-0:01:33.366	BL	0.296399	8	1.11039
Trial 8	6.3	Rep	F	0:01:33.366-0:01:33.632	BL	0.430024	8	1.61097
Trial 8	6.3	Rep	F	0:01:33.632-0:01:33.898	BL	0.731493	8	2.74036
Trial 8	6.3	Rep	F	0:01:33.898-0:01:34.164	BL	1.34326	8	5.03217
Trial 8	6.3	Rep	F	0:01:34.164-0:01:34.430	BL	1.57874	8	5.91435
Trial 8	6.3	Rep	F	0:01:34.430-0:01:34.696	BL	1.0546	8	3.95082
Trial 8	6.3	Rep	F	0:01:34.696-0:01:34.962	BL	1.60828	8	6.02502
Trial 8	6.3	Rep	F	0:01:34.962-0:01:35.228	BL	1.39418	7	5.96911
Trial 8	6.3	Rep	F	0:01:35.228-0:01:35.494	BL	0.640892	8	2.40095
Trial 8	6.3	Rep	F	0:01:35.494-0:01:35.760	BL	1.32009	8	4.94536
Trial 8	6.3	Rep	F	0:01:35.760-0:01:36.026	BL	0.780647	8	2.92451
Trial 8	6.3	Rep	F	0:01:36.026-0:01:36.292	BL	0.402264	8	1.50698
Trial 8	6.3	Rep	F	0:01:36.292-0:01:36.558	BL	0.425075	8	1.59243
Trial 8	6.3	Rep	F	0:01:36.558-0:01:36.824	BL	0.4617	8	1.72965
Trial 8	6.3	Rep	F	0:01:36.824-0:01:37.090	BL	1.55152	8	5.81235
Trial 8	6.3	Rep	F	0:01:37.090-0:01:37.356	BL	2.212	8	8.28671
Trial 8	6.3	Rep	F	0:01:37.356-0:01:37.622	BL	1.14459	8	4.28792
Trial 8	6.3	Rep	F	0:01:37.622-0:01:37.888	BL	0.321215	8	1.20335
Trial 8	6.3	Rep	F	0:01:37.888-0:01:38.154	BL	0.483321	8	1.81065
Trial 8	6.3	Rep	F	0:01:38.154-0:01:38.420	BL	0.828693	8	3.10448
Trial 8	6.3	Rep	F	0:01:38.420-0:01:38.686	BL	1.48232	8	5.55316
Trial 8	6.3	Rep	F	0:01:38.686-0:01:38.952	BL	1.2023	8	4.50413
Trial 8	6.3	Rep	F	0:01:38.952-0:01:39.218	BL	0.535074	8	2.00452
Trial 8	6.3	Rep	F	0:01:39.218-0:01:39.484	BL	0.357442	8	1.33907
Trial 8	6.3	Rep	F	0:01:39.484-0:01:39.750	BL	0.49588	8	1.85769
Trial 8	6.3	Rep	F	0:01:39.750-0:01:40.016	BL	0.252547	8	0.946109
Trial 8	6.3	Rep	F	0:01:40.016-0:01:40.282	BL	0.389423	8	1.45888
Trial 8	6.3	Rep	F	0:01:40.282-0:01:40.548	BL	2.77685	8	10.4027
Trial 8	6.3	Rep	F	0:01:40.548-0:01:40.814	BL	3.5133	8	13.1617
Trial 8	6.3	Rep	F	0:01:40.814-0:01:41.080	BL	2.76987	8	10.3766
Trial 8	6.3	Rep	F	0:01:41.080-0:01:41.346	BL	1.02342	8	3.834
Trial 8	6.3	Rep	F	0:01:41.346-0:01:41.612	BL	1.15625	8	4.33162
Trial 8	6.3	Rep	F	0:01:41.612-0:01:41.878	BL	0.183091	8	0.685904
Trial 8	6.3	Rep	F	0:01:41.878-0:01:42.144	BL	0.563777	8	2.11205
Trial 8	6.3	Rep	F	0:01:42.144-0:01:42.410	BL	0.427212	8	1.60044
Trial 8	6.3	Rep	F	0:01:42.410-0:01:42.676	BL	1.17774	8	4.41213
Trial 8	6.3	Rep	F	0:01:42.676-0:01:42.942	BL	0.292383	8	1.09534
Trial 8	6.3	Rep	F	0:01:42.942-0:01:43.208	BL	0.414713	8	1.55362
Trial 8	6.3	Rep	F	0:01:43.208-0:01:43.474	BL	0.152818	8	0.572494
Trial 8	6.3	Rep	F	0:01:43.474-0:01:43.740	BL	0.393703	8	1.47491
Trial 8	6.3	Rep	F	0:01:43.740-0:01:44.006	BL	0.575916	8	2.15753
Trial 8	6.3	Rep	F	0:01:44.006-0:01:44.272	BL	0.731294	8	2.73961
Trial 8	6.3	Rep	F	0:01:44.272-0:01:44.538	BL	0.385999	8	1.44605
Trial 8	6.3	Rep	F	0:01:44.538-0:01:44.804	BL	1.00172	7	4.28881
Trial 8	6.3	Rep	F	0:01:44.804-0:01:45.070	BL	0.78156	8	2.92792
Trial 8	6.3	Rep	F	0:01:45.070-0:01:45.336	BL	3.49442	8	13.0909
Trial 8	6.3	Rep	F	0:01:45.336-0:01:45.602	BL	3.43179	8	12.8564
Trial 8	6.3	Rep	F	0:01:45.602-0:01:45.868	BL	1.19871	8	4.49066
Trial 8	6.3	Rep	F	0:01:45.868-0:01:46.134	BL	0.270242	8	1.01239
Trial 8	6.3	Rep	F	0:01:46.134-0:01:46.400	BL	0.773657	8	2.89832
Trial 8	6.3	Rep	F	0:01:46.400-0:01:46.666	BL	1.01486	8	3.80193
Trial 8	6.3	Rep	F	0:01:46.666-0:01:46.932	BL	1.21011	8	4.53341
Trial 8	6.3	Rep	F	0:01:46.932-0:01:47.198	BL	0.852591	8	3.19402
Trial 8	6.3	Rep	F	0:01:47.198-0:01:47.464	BL	0.825134	8	3.09114
Trial 8	6.3	Rep	F	0:01:47.464-0:01:47.730	BL	1.55028	8	5.80775
Trial 8	6.3	Rep	F	0:01:47.730-0:01:47.996	BL	0.900445	8	3.37328
Trial 8	6.3	Rep	F	0:01:47.996-0:01:48.262	BL	1.79144	8	6.71121
Trial 8	6.3	Rep	F	0:01:48.262-0:01:48.528	BL	3.60041	8	13.488
Trial 8	6.3	Rep	F	0:01:48.528-0:01:48.794	BL	0.44912	8	1.68251
Trial 8	6.3	Rep	F	0:01:48.794-0:01:49.060	BL	0.387684	8	1.45236
Trial 8	6.3	Rep	F	0:01:49.060-0:01:49.326	BL	0.812634	8	3.04431
Trial 8	6.3	Rep	F	0:01:49.326-0:01:49.592	BL	0.598767	8	2.24313
Trial 8	6.3	Rep	F	0:01:49.592-0:01:49.858	BL	0.732512	8	2.74416
Trial 8	6.3	Rep	F	0:01:49.858-0:01:50.124	BL	0.435486	8	1.63143
Trial 8	6.3	Rep	F	0:01:50.124-0:01:50.390	BL	0.688871	8	2.58069
Trial 8	6.3	Rep	F	0:01:50.390-0:01:50.656	BL	2.07479	8	7.77269
Trial 8	6.3	Rep	F	0:01:50.656-0:01:50.922	BL	3.43754	8	12.8779
Trial 8	6.3	Rep	F	0:01:50.922-0:01:51.188	BL	2.56782	8	9.61967
Trial 8	6.3	Rep	F	0:01:51.188-0:01:51.454	BL	2.0594	8	7.71502
Trial 8	6.3	Rep	F	0:01:51.454-0:01:51.720	BL	2.88732	8	10.8167
Trial 8	6.3	Rep	F	0:01:51.720-0:01:51.986	BL	3.01708	8	11.3027
Trial 8	6.3	Rep	F	0:01:51.986-0:01:52.252	BL	1.36911	8	5.12906
Trial 8	6.3	Rep	F	0:01:52.252-0:01:52.518	BL	1.39672	8	5.23246
Trial 8	6.3	Rep	F	0:01:52.518-0:01:52.784	BL	1.54704	8	5.79561
Trial 8	6.3	Rep	F	0:01:52.784-0:01:53.050	BL	0.575314	8	2.15527
Trial 8	6.3	Rep	F	0:01:53.050-0:01:53.316	BL	0.739705	8	2.77111
Trial 8	6.3	Rep	F	0:01:53.316-0:01:53.582	BL	1.03898	8	3.8923
Trial 8	6.3	Rep	F	0:01:53.582-0:01:53.848	BL	0.450889	8	1.68914
Trial 8	6.3	Rep	F	0:01:53.848-0:01:54.114	BL	0.3452	7	1.47795
Trial 8	6.3	Rep	F	0:01:54.114-0:01:54.380	BL	0.127742	8	0.478555
Trial 8	6.3	Rep	F	0:01:54.380-0:01:54.646	BL	0.1219	8	0.456669
Trial 8	6.3	Rep	F	0:01:54.646-0:01:54.912	BL	0.512696	8	1.92068
Trial 8	6.3	Rep	F	0:01:54.912-0:01:55.178	BL	0.331355	8	1.24134
Trial 8	6.3	Rep	F	0:01:55.178-0:01:55.444	BL	0.249041	8	0.932967
Trial 8	6.3	Rep	F	0:01:55.444-0:01:55.710	BL	0.307488	8	1.15193
Trial 8	6.3	Rep	F	0:01:55.710-0:01:55.976	BL	0.315134	8	1.18057
Trial 8	6.3	Rep	F	0:01:55.976-0:01:56.242	BL	0.390452	8	1.46274
Trial 8	6.3	Rep	F	0:01:56.242-0:01:56.508	BL	1.66679	8	6.24424
Trial 8	6.3	Rep	F	0:01:56.508-0:01:56.774	BL	0.956701	8	3.58404
Trial 8	6.3	Rep	F	0:01:56.774-0:01:57.040	BL	0.233868	8	0.876132
Trial 8	6.3	Rep	F	0:01:57.040-0:01:57.306	BL	0.393485	8	1.47409
Trial 8	6.3	Rep	F	0:01:57.306-0:01:57.572	BL	0.803433	8	3.00986
Trial 8	6.3	Rep	F	0:01:57.572-0:01:57.838	BL	1.1693	8	4.3805
Trial 8	6.3	Rep	F	0:01:57.838-0:01:58.104	BL	1.17516	8	4.40244
Trial 8	6.3	Rep	F	0:01:58.104-0:01:58.370	BL	1.02087	8	3.82445
Trial 8	6.3	Rep	F	0:01:58.370-0:01:58.636	BL	0.766744	8	2.87241
Trial 8	6.3	Rep	F	0:01:58.636-0:01:58.902	BL	0.373985	8	1.40104
Trial 8	6.3	Rep	F	0:01:58.902-0:01:59.168	BL	0.16505	8	0.618317
Trial 8	6.3	Rep	F	0:01:59.168-0:01:59.434	BL	0.15729	8	0.589249
Trial 8	6.3	Rep	F	0:01:59.434-0:01:59.700	BL	0.367965	8	1.37849
Trial 8	6.3	Rep	F	0:01:59.700-0:01:59.966	BL	0.40887	8	1.53173
Trial 8	6.3	Rep	F	0:01:59.966-0:02:00.232	BL	0.212432	8	0.795822
Trial 8	6.3	Rep	F	0:02:00.232-0:02:00.498	BL	0.657948	8	2.46484
Trial 8	6.3	Rep	F	0:02:00.498-0:02:00.764	BL	1.17985	8	4.41999
Trial 8	6.3	Rep	F	0:02:00.764-0:02:01.030	BL	2.60214	8	9.74829
Trial 8	6.3	Rep	F	0:02:01.030-0:02:01.296	BL	4.07473	8	15.265
Trial 8	6.3	Rep	F	0:02:01.296-0:02:01.562	BL	2.00127	8	7.49726
Trial 8	6.3	Rep	F	0:02:01.562-0:02:01.828	BL	1.22098	8	4.57411
Trial 8	6.3	Rep	F	0:02:01.828-0:02:02.094	BL	1.09121	8	4.08794
Trial 8	6.3	Rep	F	0:02:02.094-0:02:02.360	BL	1.08417	8	4.06159
Trial 8	6.3	Rep	F	0:02:02.360-0:02:02.626	BL	0.762777	8	2.85755
Trial 8	6.3	Rep	F	0:02:02.626-0:02:02.892	BL	1.22435	8	4.58672
Trial 8	6.3	Rep	F	0:02:02.892-0:02:03.158	BL	1.93353	8	7.24351
Trial 8	6.3	Rep	F	0:02:03.158-0:02:03.424	BL	1.04949	8	3.93163
Trial 8	6.3	Rep	F	0:02:03.424-0:02:03.690	BL	0.726331	7	3.10973
Trial 8	6.3	Rep	F	0:02:03.690-0:02:03.956	BL	0.672563	8	2.5196
Trial 8	6.3	Rep	F	0:02:03.956-0:02:04.222	BL	1.39685	8	5.23297
Trial 8	6.3	Rep	F	0:02:04.222-0:02:04.488	BL	2.05252	8	7.68927
Trial 8	6.3	Rep	F	0:02:04.488-0:02:04.754	BL	1.19373	8	4.47201
Trial 8	6.3	Rep	F	0:02:04.754-0:02:05.020	BL	1.87524	8	7.02514
Trial 8	6.3	Rep	F	0:02:05.020-0:02:05.286	BL	1.08649	8	4.07029
Trial 8	6.3	Rep	F	0:02:05.286-0:02:05.552	BL	0.819209	8	3.06898
Trial 8	6.3	Rep	F	0:02:05.552-0:02:05.818	BL	0.900647	8	3.37405
Trial 8	6.3	Rep	F	0:02:05.818-0:02:06.084	BL	0.768893	8	2.88047
Trial 8	6.3	Rep	F	0:02:06.084-0:02:06.350	BL	0.341457	8	1.27918
Trial 8	6.3	Rep	F	0:02:06.350-0:02:06.616	BL	0.990795	8	3.71177
Trial 8	6.3	Rep	F	0:02:06.616-0:02:06.882	BL	0.915702	8	3.43044
Trial 8	6.3	Rep	F	0:02:06.882-0:02:07.148	BL	0.524494	8	1.96489
Trial 8	6.3	Rep	F	0:02:07.148-0:02:07.414	BL	3.47272	8	13.0097
Trial 8	6.3	Rep	F	0:02:07.414-0:02:07.680	BL	1.11038	8	4.15977
Trial 8	6.3	Rep	F	0:02:07.680-0:02:07.946	BL	1.50859	8	5.65157
Trial 8	6.3	Rep	F	0:02:07.946-0:02:08.212	BL	0.938666	8	3.51647
Trial 8	6.3	Rep	F	0:02:08.212-0:02:08.478	BL	0.23621	8	0.8849
Trial 8	6.3	Rep	F	0:02:08.478-0:02:08.744	BL	0.38214	8	1.43159
Trial 8	6.3	Rep	F	0:02:08.744-0:02:09.010	BL	0.486349	8	1.82198
Trial 8	6.3	Rep	F	0:02:09.010-0:02:09.276	BL	1.19387	8	4.47255
Trial 8	6.3	Rep	F	0:02:09.276-0:02:09.542	BL	2.67526	8	10.0222
Trial 8	6.3	Rep	F	0:02:09.542-0:02:09.808	BL	0.998591	8	3.74096
Trial 8	6.3	Rep	F	0:02:09.808-0:02:10.074	BL	1.53304	8	5.74317
Trial 8	6.3	Rep	F	0:02:10.074-0:02:10.340	BL	1.6546	8	6.19855
Trial 8	6.3	Rep	F	0:02:10.340-0:02:10.606	BL	0.373269	8	1.39836
Trial 8	6.3	Rep	F	0:02:10.606-0:02:10.872	BL	0.461342	8	1.7283
Trial 8	6.3	Rep	F	0:02:10.872-0:02:11.138	BL	0.739342	8	2.76975
Trial 8	6.3	Rep	F	0:02:11.138-0:02:11.404	BL	1.59148	8	5.96209
Trial 8	6.3	Rep	F	0:02:11.404-0:02:11.670	BL	4.41677	8	16.5463
Trial 8	6.3	Rep	F	0:02:11.670-0:02:11.936	BL	3.01652	8	11.3007
Trial 8	6.3	Rep	F	0:02:11.936-0:02:12.202	BL	1.35176	8	5.06404
Trial 8	6.3	Rep	F	0:02:12.202-0:02:12.468	BL	0.929386	8	3.48171
Trial 8	6.3	Rep	F	0:02:12.468-0:02:12.734	BL	1.14286	8	4.28142
Trial 8	6.3	Rep	F	0:02:12.734-0:02:13.000	BL	0.322043	8	1.20645
Trial 8	6.3	Rep	F	0:02:13.000-0:02:13.266	BL	0.822575	7	3.52179
Trial 8	6.3	Rep	F	0:02:13.266-0:02:13.532	BL	1.79096	8	6.7094
Trial 8	6.3	Rep	F	0:02:13.532-0:02:13.798	BL	0.943653	8	3.53515
Trial 8	6.3	Rep	F	0:02:13.798-0:02:14.064	BL	0.906751	8	3.39692
Trial 8	6.3	Rep	F	0:02:14.064-0:02:14.330	BL	1.63769	8	6.1352
Trial 8	6.3	Rep	F	0:02:14.330-0:02:14.596	BL	1.16626	8	4.36909
Trial 8	6.3	Rep	F	0:02:14.596-0:02:14.862	BL	2.01499	8	7.54868
Trial 8	6.3	Rep	F	0:02:14.862-0:02:15.128	BL	0.305968	8	1.14623
Trial 8	6.3	Rep	F	0:02:15.128-0:02:15.394	BL	0.73767	8	2.7635
Trial 8	6.3	Rep	F	0:02:15.394-0:02:15.660	BL	0.365841	8	1.37053
Trial 8	6.3	Rep	F	0:02:15.660-0:02:15.926	BL	0.976859	8	3.65956
Trial 8	6.3	Rep	F	0:02:15.926-0:02:16.192	BL	2.99361	8	11.2148
Trial 8	6.3	Rep	F	0:02:16.192-0:02:16.458	BL	1.76215	8	6.60144
Trial 8	6.3	Rep	F	0:02:16.458-0:02:16.724	BL	0.391828	8	1.46789
Trial 8	6.3	Rep	F	0:02:16.724-0:02:16.990	BL	0.494778	8	1.85356
Trial 8	6.3	Rep	F	0:02:16.990-0:02:17.256	BL	0.204358	8	0.765576
Trial 8	6.3	Rep	F	0:02:17.256-0:02:17.522	BL	0.849876	8	3.18386
Trial 8	6.3	Rep	F	0:02:17.522-0:02:17.788	BL	2.73098	8	10.2309
Trial 8	6.3	Rep	F	0:02:17.788-0:02:18.054	BL	2.26099	8	8.47027
Trial 8	6.3	Rep	F	0:02:18.054-0:02:18.320	BL	1.32513	8	4.96425
Trial 8	6.3	Rep	F	0:02:18.320-0:02:18.586	BL	1.34456	8	5.03704
Trial 8	6.3	Rep	F	0:02:18.586-0:02:18.852	BL	0.637521	8	2.38832
Trial 8	6.3	Rep	F	0:02:18.852-0:02:19.118	BL	0.200749	8	0.752056
Trial 8	6.3	Rep	F	0:02:19.118-0:02:19.384	BL	0.145763	8	0.546066
Trial 8	6.3	Rep	F	0:02:19.384-0:02:19.650	BL	0.170194	8	0.637589
Trial 8	6.3	Rep	F	0:02:19.650-0:02:19.916	BL	0.158288	8	0.592987
Trial 8	6.3	Rep	F	0:02:19.916-0:02:20.182	BL	0.100776	8	0.377531
Trial 8	6.3	Rep	F	0:02:20.182-0:02:20.448	BL	0.096415	8	0.361195
Trial 8	6.3	Rep	F	0:02:20.448-0:02:20.714	BL	0.0985558	8	0.369216
Trial 8	6.3	Rep	F	0:02:20.714-0:02:20.980	BL	0.17593	8	0.659079
Trial 8	6.3	Rep	F	0:02:20.980-0:02:21.246	BL	0.11399	8	0.427032
Trial 8	6.3	Rep	F	0:02:21.246-0:02:21.512	BL	0.11505	8	0.431007
Trial 8	6.3	Rep	F	0:02:21.512-0:02:21.778	BL	0.134771	8	0.504884
Trial 8	6.3	Rep	F	0:02:21.778-0:02:22.044	BL	0.118541	8	0.444089
Trial 8	6.3	Rep	F	0:02:22.044-0:02:22.310	BL	0.104278	8	0.390651
Trial 8	6.3	Rep	F	0:02:22.310-0:02:22.576	BL	0.101575	8	0.380525
Trial 8	6.3	Rep	F	0:02:22.576-0:02:22.842	BL	0.100181	7	0.428917
Trial 8	6.3	Rep	F	0:02:22.842-0:02:23.108	BL	0.0796174	8	0.298268
Trial 8	6.3	Rep	F	0:02:23.108-0:02:23.374	BL	0.114415	8	0.428628
Trial 8	6.3	Rep	F	0:02:23.374-0:02:23.640	BL	0.40828	8	1.52952
Trial 8	6.3	Rep	F	0:02:23.640-0:02:23.906	BL	0.191248	8	0.716462
Trial 8	6.3	Rep	F	0:02:23.906-0:02:24.172	BL	0.227848	8	0.85357
Trial 8	6.3	Rep	F	0:02:24.172-0:02:24.438	BL	0.651794	8	2.44178
Trial 8	6.3	Rep	F	0:02:24.438-0:02:24.704	BL	0.57303	8	2.14672
Trial 8	6.3	Rep	F	0:02:24.704-0:02:24.970	BL	0.168569	8	0.631502
Trial 8	6.3	Rep	F	0:02:24.970-0:02:25.236	BL	0.924777	8	3.46444
Trial 8	6.3	Rep	F	0:02:25.236-0:02:25.502	BL	1.8142	8	6.79646
Trial 8	6.3	Rep	F	0:02:25.502-0:02:25.768	BL	0.774678	8	2.90215
Trial 8	6.3	Rep	F	0:02:25.768-0:02:26.034	BL	0.897775	8	3.36328
Trial 8	6.3	Rep	F	0:02:26.034-0:02:26.300	BL	1.55029	8	5.80777
Trial 8	6.3	Rep	F	0:02:26.300-0:02:26.566	BL	1.83463	8	6.87298
Trial 8	6.3	Rep	F	0:02:26.566-0:02:26.832	BL	3.19895	8	11.984
Trial 8	6.3	Rep	F	0:02:26.832-0:02:27.098	BL	1.51211	8	5.66476
Trial 8	6.3	Rep	F	0:02:27.098-0:02:27.364	BL	0.40954	8	1.53424
Trial 8	6.3	Rep	F	0:02:27.364-0:02:27.630	BL	1.9898	8	7.4543
Trial 8	6.3	Rep	F	0:02:27.630-0:02:27.896	BL	2.64426	8	9.90603
Trial 8	6.3	Rep	F	0:02:27.896-0:02:28.162	BL	2.79694	8	10.478
Trial 8	6.3	Rep	F	0:02:28.162-0:02:28.428	BL	3.22205	8	12.0706
Trial 8	6.3	Rep	F	0:02:28.428-0:02:28.694	BL	1.53381	8	5.74601
Trial 8	6.3	Rep	F	0:02:28.694-0:02:28.960	BL	1.16573	8	4.36712
Trial 8	6.3	Rep	F	0:02:28.960-0:02:29.226	BL	1.5039	8	5.63399
Trial 8	6.3	Rep	F	0:02:29.226-0:02:29.492	BL	0.715061	8	2.6788
Trial 8	6.3	Rep	F	0:02:29.492-0:02:29.758	BL	0.48164	8	1.80436
Trial 8	6.3	Rep	F	0:02:29.758-0:02:30.024	BL	1.21832	8	4.56413
Trial 8	6.3	Rep	F	0:02:30.024-0:02:30.290	BL	0.821359	8	3.07702
Trial 8	6.3	Rep	F	0:02:30.290-0:02:30.556	BL	0.362423	8	1.35772
Trial 8	6.3	Rep	F	0:02:30.556-0:02:30.822	BL	0.835649	8	3.13054
Trial 8	6.3	Rep	F	0:02:30.822-0:02:31.088	BL	1.81395	8	6.79553
Trial 8	6.3	Rep	F	0:02:31.088-0:02:31.354	BL	1.07534	8	4.0285
Trial 8	6.3	Rep	F	0:02:31.354-0:02:31.620	BL	0.675261	8	2.5297
Trial 8	6.3	Rep	F	0:02:31.620-0:02:31.886	BL	1.22989	8	4.60747
Trial 8	6.3	Rep	F	0:02:31.886-0:02:32.152	BL	2.53954	7	10.8728
Trial 8	6.3	Rep	F	0:02:32.152-0:02:32.418	BL	3.70818	8	13.8918
Trial 8	6.3	Rep	F	0:02:32.418-0:02:32.684	BL	4.43698	8	16.622
Trial 8	6.3	Rep	F	0:02:32.684-0:02:32.950	BL	4.19341	8	15.7095
Trial 8	6.3	Rep	F	0:02:32.950-0:02:33.216	BL	3.59701	8	13.4753
Trial 8	6.3	Rep	F	0:02:33.216-0:02:33.482	BL	1.94258	8	7.27738
Trial 8	6.3	Rep	F	0:02:33.482-0:02:33.748	BL	0.422478	8	1.58271
Trial 8	6.3	Rep	F	0:02:33.748-0:02:34.014	BL	0.198382	8	0.743187
Trial 8	6.3	Rep	F	0:02:34.014-0:02:34.280	BL	0.141499	8	0.530087
Trial 8	6.3	Rep	F	0:02:34.280-0:02:34.546	BL	0.143344	8	0.537008
Trial 8	6.3	Rep	F	0:02:34.546-0:02:34.812	BL	0.183347	8	0.686863
Trial 8	6.3	Rep	F	0:02:34.812-0:02:35.078	BL	0.565667	8	2.11914
Trial 8	6.3	Rep	F	0:02:35.078-0:02:35.344	BL	0.758643	8	2.84206
Trial 8	6.3	Rep	F	0:02:35.344-0:02:35.610	BL	1.54387	8	5.78372
Trial 8	6.3	Rep	F	0:02:35.610-0:02:35.876	BL	0.595578	8	2.23119
Trial 8	6.3	Rep	F	0:02:35.876-0:02:36.142	BL	1.22617	8	4.59353
Trial 8	6.3	Rep	F	0:02:36.142-0:02:36.408	BL	0.358049	8	1.34134
Trial 8	6.3	Rep	F	0:02:36.408-0:02:36.674	BL	0.384942	8	1.44209
Trial 8	6.3	Rep	F	0:02:36.674-0:02:36.940	BL	0.438125	8	1.64132
Trial 8	6.3	Rep	F	0:02:36.940-0:02:37.206	BL	0.624002	8	2.33767
Trial 8	6.3	Rep	F	0:02:37.206-0:02:37.472	BL	0.273771	8	1.02561
Trial 8	6.3	Rep	F	0:02:37.472-0:02:37.738	BL	0.11737	8	0.4397
Trial 8	6.3	Rep	F	0:02:37.738-0:02:38.004	BL	0.225996	8	0.846637
Trial 8	6.3	Rep	F	0:02:38.004-0:02:38.270	BL	0.125487	8	0.470104
Trial 8	6.3	Rep	F	0:02:38.270-0:02:38.536	BL	0.171646	8	0.64303
Trial 8	6.3	Rep	F	0:02:38.536-0:02:38.802	BL	0.0953383	8	0.357161
Trial 8	6.3	Rep	F	0:02:38.802-0:02:39.068	BL	0.132106	8	0.494901
Trial 8	6.3	Rep	F	0:02:39.068-0:02:39.334	BL	0.52652	8	1.97247
Trial 8	6.3	Rep	F	0:02:39.334-0:02:39.600	BL	1.08635	8	4.06974
Trial 8	6.3	Rep	F	0:02:39.600-0:02:39.866	BL	0.994748	8	3.72659
Trial 8	6.3	Rep	F	0:02:39.866-0:02:40.132	BL	1.24218	8	4.65352
Trial 8	6.3	Rep	F	0:02:40.132-0:02:40.398	BL	0.805146	8	3.01628
Trial 8	6.3	Rep	F	0:02:40.398-0:02:40.664	BL	1.48042	8	5.54605
Trial 8	6.3	Rep	F	0:02:40.664-0:02:40.930	BL	1.64227	8	6.15235
Trial 8	6.3	Rep	F	0:02:40.930-0:02:41.196	BL	1.07402	8	4.02357
Trial 8	6.3	Rep	F	0:02:41.196-0:02:41.462	BL	1.70486	8	6.38684
Trial 8	6.3	Rep	F	0:02:41.462-0:02:41.728	BL	0.342618	7	1.46689
Trial 8	6.3	Rep	F	0:02:41.728-0:02:41.994	BL	0.219124	8	0.820892
Trial 8	6.3	Rep	F	0:02:41.994-0:02:42.260	BL	0.638292	8	2.3912
Trial 8	6.3	Rep	F	0:02:42.260-0:02:42.526	BL	0.737909	8	2.76439
Trial 8	6.3	Rep	F	0:02:42.526-0:02:42.792	BL	0.678473	8	2.54174
Trial 8	6.3	Rep	F	0:02:42.792-0:02:43.058	BL	1.51473	8	5.67455
Trial 8	6.3	Rep	F	0:02:43.058-0:02:43.324	BL	2.04983	8	7.67917
Trial 8	6.3	Rep	F	0:02:43.324-0:02:43.590	BL	0.940108	8	3.52187
Trial 8	6.3	Rep	F	0:02:43.590-0:02:43.856	BL	0.706391	8	2.64631
Trial 8	6.3	Rep	F	0:02:43.856-0:02:44.122	BL	0.806001	8	3.01949
Trial 8	6.3	Rep	F	0:02:44.122-0:02:44.388	BL	1.2555	8	4.70343
Trial 8	6.3	Rep	F	0:02:44.388-0:02:44.654	BL	1.51211	8	5.66477
Trial 8	6.3	Rep	F	0:02:44.654-0:02:44.920	BL	1.83968	8	6.8919
Trial 8	6.3	Rep	F	0:02:44.920-0:02:45.186	BL	1.13725	8	4.26043
Trial 8	6.3	Rep	F	0:02:45.186-0:02:45.452	BL	0.689991	8	2.58489
Trial 8	6.3	Rep	F	0:02:45.452-0:02:45.718	BL	0.404688	8	1.51606
Trial 8	6.3	Rep	F	0:02:45.718-0:02:45.984	BL	1.20657	8	4.52012
Trial 8	6.3	Rep	F	0:02:45.984-0:02:46.250	BL	2.21716	8	8.30604
Trial 8	6.3	Rep	F	0:02:46.250-0:02:46.516	BL	2.18815	8	8.19735
Trial 8	6.3	Rep	F	0:02:46.516-0:02:46.782	BL	1.95064	8	7.30761
Trial 8	6.3	Rep	F	0:02:46.782-0:02:47.048	BL	0.671032	8	2.51384
Trial 8	6.3	Rep	F	0:02:47.048-0:02:47.314	BL	0.426944	8	1.59944
Trial 8	6.3	Rep	F	0:02:47.314-0:02:47.580	BL	0.709365	8	2.65746
Trial 8	6.3	Rep	F	0:02:47.580-0:02:47.846	BL	0.659352	8	2.4701
Trial 8	6.3	Rep	F	0:02:47.846-0:02:48.112	BL	0.237156	8	0.888447
Trial 8	6.3	Rep	F	0:02:48.112-0:02:48.378	BL	0.222446	8	0.833341
Trial 8	6.3	Rep	F	0:02:48.378-0:02:48.644	BL	0.601186	8	2.2522
Trial 8	6.3	Rep	F	0:02:48.644-0:02:48.910	BL	2.36941	8	8.87639
Trial 8	6.3	Rep	F	0:02:48.910-0:02:49.176	BL	4.47436	8	16.762
Trial 8	6.3	Rep	F	0:02:49.176-0:02:49.442	BL	4.38007	8	16.4089
Trial 8	6.3	Rep	F	0:02:49.442-0:02:49.708	BL	2.67333	8	10.015
Trial 8	6.3	Rep	F	0:02:49.708-0:02:49.974	BL	1.39496	8	5.22587
Trial 8	6.3	Rep	F	0:02:49.974-0:02:50.240	BL	0.187893	8	0.703892
Trial 8	6.3	Rep	F	0:02:50.240-0:02:50.506	BL	1.2766	8	4.78243
Trial 8	6.3	Rep	F	0:02:50.506-0:02:50.772	BL	1.91743	8	7.18318
Trial 8	6.3	Rep	F	0:02:50.772-0:02:51.038	BL	0.577765	8	2.16445
Trial 8	6.3	Rep	F	0:02:51.038-0:02:51.304	BL	0.188063	7	0.805177
Trial 8	6.3	Rep	F	0:02:51.304-0:02:51.570	BL	0.314884	8	1.17965
Trial 8	6.3	Rep	F	0:02:51.570-0:02:51.836	BL	0.611062	8	2.28918
Trial 8	6.3	Rep	F	0:02:51.836-0:02:52.102	BL	0.233303	8	0.874009
Trial 8	6.3	Rep	F	0:02:52.102-0:02:52.368	BL	0.191245	8	0.716447
Trial 8	6.3	Rep	F	0:02:52.368-0:02:52.634	BL	0.470233	8	1.7616
Trial 8	6.3	Rep	F	0:02:52.634-0:02:52.900	BL	0.286892	8	1.07477
Trial 8	6.3	Rep	F	0:02:52.900-0:02:53.166	BL	0.300216	8	1.12468
Trial 8	6.3	Rep	F	0:02:53.166-0:02:53.432	BL	0.355166	8	1.33055
Trial 8	6.3	Rep	F	0:02:53.432-0:02:53.698	BL	0.396311	8	1.48468
Trial 8	6.3	Rep	F	0:02:53.698-0:02:53.964	BL	0.157992	8	0.591877
Trial 8	6.3	Rep	F	0:02:53.964-0:02:54.230	BL	0.417537	8	1.5642
Trial 8	6.3	Rep	F	0:02:54.230-0:02:54.496	BL	1.07989	8	4.04552
Trial 8	6.3	Rep	F	0:02:54.496-0:02:54.762	BL	1.12215	8	4.20388
Trial 8	6.3	Rep	F	0:02:54.762-0:02:55.028	BL	0.831594	8	3.11535
Trial 8	6.3	Rep	F	0:02:55.028-0:02:55.294	BL	1.8715	8	7.01108
Trial 8	6.3	Rep	F	0:02:55.294-0:02:55.560	BL	2.08497	8	7.81085
Trial 8	6.3	Rep	F	0:02:55.560-0:02:55.826	BL	1.38169	8	5.17614
Trial 8	6.3	Rep	F	0:02:55.826-0:02:56.092	BL	0.529963	8	1.98538
Trial 8	6.3	Rep	F	0:02:56.092-0:02:56.358	BL	0.703579	8	2.63578
Trial 8	6.3	Rep	F	0:02:56.358-0:02:56.624	BL	0.361936	8	1.3559
Trial 8	6.3	Rep	F	0:02:56.624-0:02:56.890	BL	0.320934	8	1.2023
Trial 8	6.3	Rep	F	0:02:56.890-0:02:57.156	BL	0.565349	8	2.11793
Trial 8	6.3	Rep	F	0:02:57.156-0:02:57.422	BL	3.45875	8	12.9574
Trial 8	6.3	Rep	F	0:02:57.422-0:02:57.688	BL	3.72467	8	13.9535
Trial 8	6.3	Rep	F	0:02:57.688-0:02:57.954	BL	3.41082	8	12.7778
Trial 8	6.3	Rep	F	0:02:57.954-0:02:58.220	BL	3.17187	8	11.8827
Trial 8	6.3	Rep	F	0:02:58.220-0:02:58.486	BL	1.73898	8	6.51465
Trial 8	6.3	Rep	F	0:02:58.486-0:02:58.752	BL	2.16146	8	8.09736
Trial 8	6.3	Rep	F	0:02:58.752-0:02:59.018	BL	3.01144	8	11.2816
Trial 8	6.3	Rep	F	0:02:59.018-0:02:59.284	BL	0.968154	8	3.62695
Trial 8	6.3	Rep	F	0:02:59.284-0:02:59.550	BL	3.26515	8	12.2321
Trial 8	6.3	Rep	F	0:02:59.550-0:02:59.816	BL	2.29121	8	8.58344
Trial 8	6.3	Rep	F	0:02:59.816-0:03:00.082	BL	1.72647	8	6.46777
Trial 8	6.3	Rep	F	0:03:00.082-0:03:00.348	CS1a	1.45147	8	5.43756
Trial 8	6.3	Rep	F	0:03:00.348-0:03:00.614	CS1a	0.580824	8	2.17591
Trial 8	6.3	Rep	F	0:03:00.614-0:03:00.880	CS1a	0.210487	7	0.901181
Trial 8	6.3	Rep	F	0:03:00.880-0:03:01.146	CS1a	0.37909	8	1.42017
Trial 8	6.3	Rep	F	0:03:01.146-0:03:01.412	CS1a	0.540075	8	2.02325
Trial 8	6.3	Rep	F	0:03:01.412-0:03:01.678	CS1a	2.68816	8	10.0706
Trial 8	6.3	Rep	F	0:03:01.678-0:03:01.944	CS1a	2.10159	8	7.87309
Trial 8	6.3	Rep	F	0:03:01.944-0:03:02.210	CS1a	2.60832	8	9.77145
Trial 8	6.3	Rep	F	0:03:02.210-0:03:02.476	CS1a	0.996168	8	3.7319
Trial 8	6.3	Rep	F	0:03:02.476-0:03:02.742	CS1a	0.247543	8	0.927355
Trial 8	6.3	Rep	F	0:03:02.742-0:03:03.008	CS1a	0.247543	8	0.927359
Trial 8	6.3	Rep	F	0:03:03.008-0:03:03.274	CS1a	0.247543	8	0.927355
Trial 8	6.3	Rep	F	0:03:03.274-0:03:03.540	CS1a	0.247543	8	0.927355
Trial 8	6.3	Rep	F	0:03:03.540-0:03:03.806	CS1a	0.247543	8	0.927359
Trial 8	6.3	Rep	F	0:03:03.806-0:03:04.072	CS1a	0.247543	8	0.927355
Trial 8	6.3	Rep	F	0:03:04.072-0:03:04.338	CS1a	0.247543	8	0.927359
Trial 8	6.3	Rep	F	0:03:04.338-0:03:04.604	CS1a	0.247543	8	0.927355
Trial 8	6.3	Rep	F	0:03:04.604-0:03:04.870	CS1a	0.247543	8	0.927355
Trial 8	6.3	Rep	F	0:03:04.870-0:03:05.136	CS1a	0.247543	8	0.927359
Trial 8	6.3	Rep	F	0:03:05.136-0:03:05.402	CS1a	2.95545	8	11.0719
Trial 8	6.3	Rep	F	0:03:05.402-0:03:05.668	CS1a	1.07056	8	4.01059
Trial 8	6.3	Rep	F	0:03:05.668-0:03:05.934	CS1a	1.24869	8	4.67789
Trial 8	6.3	Rep	F	0:03:05.934-0:03:06.200	CS1a	1.52032	8	5.69549
Trial 8	6.3	Rep	F	0:03:06.200-0:03:06.466	CS1a	1.36397	8	5.1098
Trial 8	6.3	Rep	F	0:03:06.466-0:03:06.732	CS1a	0.881452	8	3.30213
Trial 8	6.3	Rep	F	0:03:06.732-0:03:06.998	CS1a	0.891758	8	3.34077
Trial 8	6.3	Rep	F	0:03:06.998-0:03:07.264	CS1a	0.996597	8	3.73349
Trial 8	6.3	Rep	F	0:03:07.264-0:03:07.530	CS1a	3.90607	8	14.6332
Trial 8	6.3	Rep	F	0:03:07.530-0:03:07.796	CS1a	3.83338	8	14.3608
Trial 8	6.3	Rep	F	0:03:07.796-0:03:08.062	CS1a	2.02808	8	7.59768
Trial 8	6.3	Rep	F	0:03:08.062-0:03:08.328	CS1a	0.630611	8	2.36243
Trial 8	6.3	Rep	F	0:03:08.328-0:03:08.594	CS1a	0.506635	8	1.89797
Trial 8	6.3	Rep	F	0:03:08.594-0:03:08.860	CS1a	1.27252	8	4.76717
Trial 8	6.3	Rep	F	0:03:08.860-0:03:09.126	CS1a	1.14592	8	4.29291
Trial 8	6.3	Rep	F	0:03:09.126-0:03:09.392	CS1a	0.763295	8	2.85949
Trial 8	6.3	Rep	F	0:03:09.392-0:03:09.658	CS1a	3.59981	8	13.4858
Trial 8	6.3	Rep	F	0:03:09.658-0:03:09.924	CS1a	4.64669	8	17.4076
Trial 8	6.3	Rep	F	0:03:09.924-0:03:10.190	CS1a	3.61137	7	15.4618
Trial 8	6.3	Rep	F	0:03:10.190-0:03:10.456	CS1b	1.04135	8	3.90116
Trial 8	6.3	Rep	F	0:03:10.456-0:03:10.722	CS1b	0.257442	8	0.964439
Trial 8	6.3	Rep	F	0:03:10.722-0:03:10.988	CS1b	0.247165	8	0.925938
Trial 8	6.3	Rep	F	0:03:10.988-0:03:11.254	CS1b	0.427332	8	1.6009
Trial 8	6.3	Rep	F	0:03:11.254-0:03:11.520	CS1b	1.27347	8	4.77073
Trial 8	6.3	Rep	F	0:03:11.520-0:03:11.786	CS1b	0.402472	8	1.50776
Trial 8	6.3	Rep	F	0:03:11.786-0:03:12.052	CS1b	0.119267	8	0.446802
Trial 8	6.3	Rep	F	0:03:12.052-0:03:12.318	CS1b	0.141282	8	0.529279
Trial 8	6.3	Rep	F	0:03:12.318-0:03:12.584	CS1b	0.232503	8	0.871028
Trial 8	6.3	Rep	F	0:03:12.584-0:03:12.850	CS1b	0.624443	8	2.33931
Trial 8	6.3	Rep	F	0:03:12.850-0:03:13.116	CS1b	0.447376	8	1.67598
Trial 8	6.3	Rep	F	0:03:13.116-0:03:13.382	CS1b	0.417502	8	1.56407
Trial 8	6.3	Rep	F	0:03:13.382-0:03:13.648	CS1b	1.02556	8	3.84201
Trial 8	6.3	Rep	F	0:03:13.648-0:03:13.914	CS1b	2.48389	8	9.3053
Trial 8	6.3	Rep	F	0:03:13.914-0:03:14.180	CS1b	1.34221	8	5.02826
Trial 8	6.3	Rep	F	0:03:14.180-0:03:14.446	CS1b	0.214331	8	0.80294
Trial 8	6.3	Rep	F	0:03:14.446-0:03:14.712	CS1b	0.235694	8	0.882969
Trial 8	6.3	Rep	F	0:03:14.712-0:03:14.978	CS1b	0.452163	8	1.69391
Trial 8	6.3	Rep	F	0:03:14.978-0:03:15.244	CS1b	0.288074	8	1.0792
Trial 8	6.3	Rep	F	0:03:15.244-0:03:15.510	CS1b	0.784842	8	2.94022
Trial 8	6.3	Rep	F	0:03:15.510-0:03:15.776	CS1b	0.481151	8	1.80252
Trial 8	6.3	Rep	F	0:03:15.776-0:03:16.042	CS1b	1.25055	8	4.68487
Trial 8	6.3	Rep	F	0:03:16.042-0:03:16.308	CS1b	3.66786	8	13.7407
Trial 8	6.3	Rep	F	0:03:16.308-0:03:16.574	CS1b	2.88777	8	10.8183
Trial 8	6.3	Rep	F	0:03:16.574-0:03:16.840	CS1b	1.15004	8	4.30834
Trial 8	6.3	Rep	F	0:03:16.840-0:03:17.106	CS1b	0.334274	8	1.25228
Trial 8	6.3	Rep	F	0:03:17.106-0:03:17.372	CS1b	0.191838	8	0.718674
Trial 8	6.3	Rep	F	0:03:17.372-0:03:17.638	CS1b	0.340355	8	1.27505
Trial 8	6.3	Rep	F	0:03:17.638-0:03:17.904	CS1b	0.549948	8	2.06025
Trial 8	6.3	Rep	F	0:03:17.904-0:03:18.170	CS1b	0.657935	8	2.46479
Trial 8	6.3	Rep	F	0:03:18.170-0:03:18.436	CS1b	2.37945	8	8.91404
Trial 8	6.3	Rep	F	0:03:18.436-0:03:18.702	CS1b	3.77509	8	14.1424
Trial 8	6.3	Rep	F	0:03:18.702-0:03:18.968	CS1b	1.98761	8	7.44608
Trial 8	6.3	Rep	F	0:03:18.968-0:03:19.234	CS1b	0.230779	8	0.864561
Trial 8	6.3	Rep	F	0:03:19.234-0:03:19.500	CS1b	0.180342	8	0.675606
Trial 8	6.3	Rep	F	0:03:19.500-0:03:19.766	CS1b	0.090612	7	0.387948
Trial 8	6.3	Rep	F	0:03:19.766-0:03:20.032	CS1b	0.0803608	8	0.301054
Trial 8	6.3	Rep	F	0:03:20.032-0:03:20.298	IT1	1.1427	8	4.28082
Trial 8	6.3	Rep	F	0:03:20.298-0:03:20.564	IT1	10.1643	8	38.078
Trial 8	6.3	Rep	F	0:03:20.564-0:03:20.830	IT1	8.9752	8	33.6233
Trial 8	6.3	Rep	F	0:03:20.830-0:03:21.096	IT1	23.1889	8	86.8715
Trial 8	6.3	Rep	F	0:03:21.096-0:03:21.362	IT1	3.61114	8	13.5283
Trial 8	6.3	Rep	F	0:03:21.362-0:03:21.628	IT1	1.10498	8	4.13951
Trial 8	6.3	Rep	F	0:03:21.628-0:03:21.894	IT1	0.316365	8	1.18518
Trial 8	6.3	Rep	F	0:03:21.894-0:03:22.160	IT1	0.172685	8	0.646921
Trial 8	6.3	Rep	F	0:03:22.160-0:03:22.426	IT1	0.149136	8	0.558698
Trial 8	6.3	Rep	F	0:03:22.426-0:03:22.692	IT1	0.107048	8	0.401033
Trial 8	6.3	Rep	F	0:03:22.692-0:03:22.958	IT1	0.237327	8	0.889084
Trial 8	6.3	Rep	F	0:03:22.958-0:03:23.224	IT1	0.25184	8	0.943458
Trial 8	6.3	Rep	F	0:03:23.224-0:03:23.490	IT1	0.371318	8	1.39106
Trial 8	6.3	Rep	F	0:03:23.490-0:03:23.756	IT1	0.735277	8	2.75453
Trial 8	6.3	Rep	F	0:03:23.756-0:03:24.022	IT1	0.505715	8	1.89453
Trial 8	6.3	Rep	F	0:03:24.022-0:03:24.288	IT1	0.328423	8	1.23035
Trial 8	6.3	Rep	F	0:03:24.288-0:03:24.554	IT1	0.318015	8	1.19136
Trial 8	6.3	Rep	F	0:03:24.554-0:03:24.820	IT1	0.172061	8	0.644586
Trial 8	6.3	Rep	F	0:03:24.820-0:03:25.086	IT1	0.0523547	8	0.196133
Trial 8	6.3	Rep	F	0:03:25.086-0:03:25.352	IT1	0.0499134	8	0.186988
Trial 8	6.3	Rep	F	0:03:25.352-0:03:25.618	IT1	0.0542989	8	0.203416
Trial 8	6.3	Rep	F	0:03:25.618-0:03:25.884	IT1	0.210051	8	0.786901
Trial 8	6.3	Rep	F	0:03:25.884-0:03:26.150	IT1	0.318345	8	1.1926
Trial 8	6.3	Rep	F	0:03:26.150-0:03:26.416	IT1	0.184486	8	0.691128
Trial 8	6.3	Rep	F	0:03:26.416-0:03:26.682	IT1	0.903008	8	3.3829
Trial 8	6.3	Rep	F	0:03:26.682-0:03:26.948	IT1	0.635794	8	2.38184
Trial 8	6.3	Rep	F	0:03:26.948-0:03:27.214	IT1	0.155056	8	0.580876
Trial 8	6.3	Rep	F	0:03:27.214-0:03:27.480	IT1	0.19351	8	0.724941
Trial 8	6.3	Rep	F	0:03:27.480-0:03:27.746	IT1	0.0812534	8	0.304396
Trial 8	6.3	Rep	F	0:03:27.746-0:03:28.012	IT1	0.104461	8	0.391334
Trial 8	6.3	Rep	F	0:03:28.012-0:03:28.278	IT1	0.0676382	8	0.253389
Trial 8	6.3	Rep	F	0:03:28.278-0:03:28.544	IT1	0.141179	8	0.528889
Trial 8	6.3	Rep	F	0:03:28.544-0:03:28.810	IT1	0.258224	8	0.967376
Trial 8	6.3	Rep	F	0:03:28.810-0:03:29.076	IT1	0.469336	8	1.75825
Trial 8	6.3	Rep	F	0:03:29.076-0:03:29.342	IT1	0.323524	7	1.38515
Trial 8	6.3	Rep	F	0:03:29.342-0:03:29.608	IT1	0.474596	8	1.77797
Trial 8	6.3	Rep	F	0:03:29.608-0:03:29.874	IT1	0.767086	8	2.87369
Trial 8	6.3	Rep	F	0:03:29.874-0:03:30.140	IT1	1.37504	8	5.15128
Trial 8	6.3	Rep	F	0:03:30.140-0:03:30.406	IT1	2.50305	8	9.37701
Trial 8	6.3	Rep	F	0:03:30.406-0:03:30.672	IT1	1.0883	8	4.07702
Trial 8	6.3	Rep	F	0:03:30.672-0:03:30.938	IT1	0.881366	8	3.30183
Trial 8	6.3	Rep	F	0:03:30.938-0:03:31.204	IT1	0.329786	8	1.23546
Trial 8	6.3	Rep	F	0:03:31.204-0:03:31.470	IT1	0.719975	8	2.69721
Trial 8	6.3	Rep	F	0:03:31.470-0:03:31.736	IT1	0.266	8	0.996498
Trial 8	6.3	Rep	F	0:03:31.736-0:03:32.002	IT1	0.64855	8	2.42962
Trial 8	6.3	Rep	F	0:03:32.002-0:03:32.268	IT1	1.83483	8	6.87373
Trial 8	6.3	Rep	F	0:03:32.268-0:03:32.534	IT1	1.12979	8	4.23248
Trial 8	6.3	Rep	F	0:03:32.534-0:03:32.800	IT1	0.527554	8	1.97635
Trial 8	6.3	Rep	F	0:03:32.800-0:03:33.066	IT1	0.340826	8	1.27683
Trial 8	6.3	Rep	F	0:03:33.066-0:03:33.332	IT1	0.335948	8	1.25854
Trial 8	6.3	Rep	F	0:03:33.332-0:03:33.598	IT1	0.523572	8	1.96144
Trial 8	6.3	Rep	F	0:03:33.598-0:03:33.864	IT1	0.323549	8	1.21209
Trial 8	6.3	Rep	F	0:03:33.864-0:03:34.130	IT1	0.292205	8	1.09467
Trial 8	6.3	Rep	F	0:03:34.130-0:03:34.396	IT1	0.326363	8	1.22263
Trial 8	6.3	Rep	F	0:03:34.396-0:03:34.662	IT1	0.278512	8	1.04338
Trial 8	6.3	Rep	F	0:03:34.662-0:03:34.928	IT1	0.408544	8	1.53051
Trial 8	6.3	Rep	F	0:03:34.928-0:03:35.194	IT1	0.459392	8	1.721
Trial 8	6.3	Rep	F	0:03:35.194-0:03:35.460	IT1	0.617503	8	2.31333
Trial 8	6.3	Rep	F	0:03:35.460-0:03:35.726	IT1	0.588343	8	2.20408
Trial 8	6.3	Rep	F	0:03:35.726-0:03:35.992	IT1	0.728772	8	2.73016
Trial 8	6.3	Rep	F	0:03:35.992-0:03:36.258	IT1	1.50624	8	5.64278
Trial 8	6.3	Rep	F	0:03:36.258-0:03:36.524	IT1	1.27295	8	4.76878
Trial 8	6.3	Rep	F	0:03:36.524-0:03:36.790	IT1	0.186452	8	0.698498
Trial 8	6.3	Rep	F	0:03:36.790-0:03:37.056	IT1	0.186295	8	0.697908
Trial 8	6.3	Rep	F	0:03:37.056-0:03:37.322	IT1	0.572457	8	2.14456
Trial 8	6.3	Rep	F	0:03:37.322-0:03:37.588	IT1	0.627483	8	2.35072
Trial 8	6.3	Rep	F	0:03:37.588-0:03:37.854	IT1	0.208529	8	0.781197
Trial 8	6.3	Rep	F	0:03:37.854-0:03:38.120	IT1	0.290277	8	1.08746
Trial 8	6.3	Rep	F	0:03:38.120-0:03:38.386	IT1	0.232391	8	0.870592
Trial 8	6.3	Rep	F	0:03:38.386-0:03:38.652	IT1	0.401256	8	1.50321
Trial 8	6.3	Rep	F	0:03:38.652-0:03:38.918	IT1	0.102879	7	0.44047
Trial 8	6.3	Rep	F	0:03:38.918-0:03:39.184	IT1	0.28367	8	1.06271
Trial 8	6.3	Rep	F	0:03:39.184-0:03:39.450	IT1	0.226441	8	0.848302
Trial 8	6.3	Rep	F	0:03:39.450-0:03:39.716	IT1	0.276644	8	1.03638
Trial 8	6.3	Rep	F	0:03:39.716-0:03:39.982	IT1	0.263678	8	0.987803
Trial 8	6.3	Rep	F	0:03:39.982-0:03:40.248	IT1	0.199641	8	0.747904
Trial 8	6.3	Rep	F	0:03:40.248-0:03:40.514	IT1	0.132802	8	0.497509
Trial 8	6.3	Rep	F	0:03:40.514-0:03:40.780	IT1	0.274344	8	1.02776
Trial 8	6.3	Rep	F	0:03:40.780-0:03:41.046	IT1	0.260297	8	0.975144
Trial 8	6.3	Rep	F	0:03:41.046-0:03:41.312	IT1	0.281478	8	1.05449
Trial 8	6.3	Rep	F	0:03:41.312-0:03:41.578	IT1	0.270218	8	1.0123
Trial 8	6.3	Rep	F	0:03:41.578-0:03:41.844	IT1	0.483799	8	1.81243
Trial 8	6.3	Rep	F	0:03:41.844-0:03:42.110	IT1	0.477632	8	1.78932
Trial 8	6.3	Rep	F	0:03:42.110-0:03:42.376	IT1	0.409445	8	1.53388
Trial 8	6.3	Rep	F	0:03:42.376-0:03:42.642	IT1	0.0958733	8	0.359164
Trial 8	6.3	Rep	F	0:03:42.642-0:03:42.908	IT1	0.219238	8	0.821319
Trial 8	6.3	Rep	F	0:03:42.908-0:03:43.174	IT1	0.189069	8	0.708303
Trial 8	6.3	Rep	F	0:03:43.174-0:03:43.440	IT1	0.546444	8	2.04711
Trial 8	6.3	Rep	F	0:03:43.440-0:03:43.706	IT1	1.05009	8	3.9339
Trial 8	6.3	Rep	F	0:03:43.706-0:03:43.972	IT1	0.483546	8	1.81148
Trial 8	6.3	Rep	F	0:03:43.972-0:03:44.238	IT1	0.650495	8	2.43691
Trial 8	6.3	Rep	F	0:03:44.238-0:03:44.504	IT1	0.472209	8	1.76902
Trial 8	6.3	Rep	F	0:03:44.504-0:03:44.770	IT1	0.258382	8	0.967962
Trial 8	6.3	Rep	F	0:03:44.770-0:03:45.036	IT1	0.315976	8	1.18372
Trial 8	6.3	Rep	F	0:03:45.036-0:03:45.302	IT1	0.261185	8	0.978463
Trial 8	6.3	Rep	F	0:03:45.302-0:03:45.568	IT1	0.260065	8	0.974266
Trial 8	6.3	Rep	F	0:03:45.568-0:03:45.834	IT1	1.0044	8	3.76275
Trial 8	6.3	Rep	F	0:03:45.834-0:03:46.100	IT1	0.53553	8	2.00622
Trial 8	6.3	Rep	F	0:03:46.100-0:03:46.366	IT1	0.32184	8	1.2057
Trial 8	6.3	Rep	F	0:03:46.366-0:03:46.632	IT1	0.13147	8	0.492518
Trial 8	6.3	Rep	F	0:03:46.632-0:03:46.898	IT1	0.0786866	8	0.294779
Trial 8	6.3	Rep	F	0:03:46.898-0:03:47.164	IT1	0.101837	8	0.381507
Trial 8	6.3	Rep	F	0:03:47.164-0:03:47.430	IT1	0.0762448	8	0.285631
Trial 8	6.3	Rep	F	0:03:47.430-0:03:47.696	IT1	0.0873609	8	0.327276
Trial 8	6.3	Rep	F	0:03:47.696-0:03:47.962	IT1	0.510787	8	1.91353
Trial 8	6.3	Rep	F	0:03:47.962-0:03:48.228	IT1	0.229116	7	0.980942
Trial 8	6.3	Rep	F	0:03:48.228-0:03:48.494	IT1	0.287396	8	1.07666
Trial 8	6.3	Rep	F	0:03:48.494-0:03:48.760	IT1	0.680032	8	2.54756
Trial 8	6.3	Rep	F	0:03:48.760-0:03:49.026	IT1	0.658363	8	2.4664
Trial 8	6.3	Rep	F	0:03:49.026-0:03:49.292	IT1	0.555191	8	2.07989
Trial 8	6.3	Rep	F	0:03:49.292-0:03:49.558	IT1	0.248898	8	0.932431
Trial 8	6.3	Rep	F	0:03:49.558-0:03:49.824	IT1	0.33917	8	1.27062
Trial 8	6.3	Rep	F	0:03:49.824-0:03:50.090	IT1	0.768264	8	2.87811
Trial 8	6.3	Rep	F	0:03:50.090-0:03:50.356	IT1	0.435477	8	1.6314
Trial 8	6.3	Rep	F	0:03:50.356-0:03:50.622	IT1	0.582539	8	2.18234
Trial 8	6.3	Rep	F	0:03:50.622-0:03:50.888	IT1	0.834406	8	3.12589
Trial 8	6.3	Rep	F	0:03:50.888-0:03:51.154	IT1	0.577293	8	2.16268
Trial 8	6.3	Rep	F	0:03:51.154-0:03:51.420	IT1	0.504067	8	1.88835
Trial 8	6.3	Rep	F	0:03:51.420-0:03:51.686	IT1	0.977525	8	3.66205
Trial 8	6.3	Rep	F	0:03:51.686-0:03:51.952	IT1	1.27631	8	4.78139
Trial 8	6.3	Rep	F	0:03:51.952-0:03:52.218	IT1	0.454107	8	1.70119
Trial 8	6.3	Rep	F	0:03:52.218-0:03:52.484	IT1	0.311675	8	1.16761
Trial 8	6.3	Rep	F	0:03:52.484-0:03:52.750	IT1	0.951849	8	3.56586
Trial 8	6.3	Rep	F	0:03:52.750-0:03:53.016	IT1	0.873548	8	3.27253
Trial 8	6.3	Rep	F	0:03:53.016-0:03:53.282	IT1	0.619409	8	2.32047
Trial 8	6.3	Rep	F	0:03:53.282-0:03:53.548	IT1	0.31388	8	1.17587
Trial 8	6.3	Rep	F	0:03:53.548-0:03:53.814	IT1	0.221741	8	0.830699
Trial 8	6.3	Rep	F	0:03:53.814-0:03:54.080	IT1	0.173465	8	0.64984
Trial 8	6.3	Rep	F	0:03:54.080-0:03:54.346	IT1	0.161547	8	0.605196
Trial 8	6.3	Rep	F	0:03:54.346-0:03:54.612	IT1	0.136934	8	0.512991
Trial 8	6.3	Rep	F	0:03:54.612-0:03:54.878	IT1	0.0742408	8	0.278125
Trial 8	6.3	Rep	F	0:03:54.878-0:03:55.144	IT1	0.141499	8	0.53009
Trial 8	6.3	Rep	F	0:03:55.144-0:03:55.410	IT1	0.247915	8	0.928752
Trial 8	6.3	Rep	F	0:03:55.410-0:03:55.676	IT1	0.386029	8	1.44616
Trial 8	6.3	Rep	F	0:03:55.676-0:03:55.942	IT1	0.639254	8	2.3948
Trial 8	6.3	Rep	F	0:03:55.942-0:03:56.208	IT1	0.339368	8	1.27135
Trial 8	6.3	Rep	F	0:03:56.208-0:03:56.474	IT1	0.381009	8	1.42736
Trial 8	6.3	Rep	F	0:03:56.474-0:03:56.740	IT1	0.19443	8	0.728383
Trial 8	6.3	Rep	F	0:03:56.740-0:03:57.006	IT1	0.134524	8	0.50396
Trial 8	6.3	Rep	F	0:03:57.006-0:03:57.272	IT1	0.073363	8	0.274836
Trial 8	6.3	Rep	F	0:03:57.272-0:03:57.538	IT1	0.0616789	8	0.231064
Trial 8	6.3	Rep	F	0:03:57.538-0:03:57.804	IT1	0.0472776	7	0.202415
Trial 8	6.3	Rep	F	0:03:57.804-0:03:58.070	IT1	0.0810156	8	0.303505
Trial 8	6.3	Rep	F	0:03:58.070-0:03:58.336	IT1	0.0638825	8	0.239321
Trial 8	6.3	Rep	F	0:03:58.336-0:03:58.602	IT1	0.0467414	8	0.175105
Trial 8	6.3	Rep	F	0:03:58.602-0:03:58.868	IT1	0.0717255	8	0.268703
Trial 8	6.3	Rep	F	0:03:58.868-0:03:59.134	IT1	0.256109	8	0.959449
Trial 8	6.3	Rep	F	0:03:59.134-0:03:59.400	IT1	0.190304	8	0.712929
Trial 8	6.3	Rep	F	0:03:59.400-0:03:59.666	IT1	0.300401	8	1.12538
Trial 8	6.3	Rep	F	0:03:59.666-0:03:59.932	IT1	0.16036	8	0.600749
Trial 8	6.3	Rep	F	0:03:59.932-0:04:00.198	IT1	0.153372	8	0.574567
Trial 8	6.3	Rep	F	0:04:00.198-0:04:00.464	IT1	0.389021	8	1.45737
Trial 8	6.3	Rep	F	0:04:00.464-0:04:00.730	IT1	0.123449	8	0.462467
Trial 8	6.3	Rep	F	0:04:00.730-0:04:00.996	IT1	0.257598	8	0.965022
Trial 8	6.3	Rep	F	0:04:00.996-0:04:01.262	IT1	0.154552	8	0.578987
Trial 8	6.3	Rep	F	0:04:01.262-0:04:01.528	IT1	0.162488	8	0.60872
Trial 8	6.3	Rep	F	0:04:01.528-0:04:01.794	IT1	0.134037	8	0.502138
Trial 8	6.3	Rep	F	0:04:01.794-0:04:02.060	IT1	0.0774613	8	0.290189
Trial 8	6.3	Rep	F	0:04:02.060-0:04:02.326	IT1	0.0266771	8	0.0999386
Trial 8	6.3	Rep	F	0:04:02.326-0:04:02.592	IT1	0.0411701	8	0.154233
Trial 8	6.3	Rep	F	0:04:02.592-0:04:02.858	IT1	0.0506628	8	0.189796
Trial 8	6.3	Rep	F	0:04:02.858-0:04:03.124	IT1	0.0776594	8	0.290931
Trial 8	6.3	Rep	F	0:04:03.124-0:04:03.390	IT1	0.0776268	8	0.290809
Trial 8	6.3	Rep	F	0:04:03.390-0:04:03.656	IT1	0.207825	8	0.778567
Trial 8	6.3	Rep	F	0:04:03.656-0:04:03.922	IT1	0.201855	8	0.756196
Trial 8	6.3	Rep	F	0:04:03.922-0:04:04.188	IT1	0.191799	8	0.718527
Trial 8	6.3	Rep	F	0:04:04.188-0:04:04.454	IT1	0.107528	8	0.402826
Trial 8	6.3	Rep	F	0:04:04.454-0:04:04.720	IT1	0.151926	8	0.569153
Trial 8	6.3	Rep	F	0:04:04.720-0:04:04.986	IT1	0.124782	8	0.467464
Trial 8	6.3	Rep	F	0:04:04.986-0:04:05.252	IT1	0.131231	8	0.491625
Trial 8	6.3	Rep	F	0:04:05.252-0:04:05.518	IT1	0.04727	8	0.177085
Trial 8	6.3	Rep	F	0:04:05.518-0:04:05.784	IT1	0.0824099	8	0.308727
Trial 8	6.3	Rep	F	0:04:05.784-0:04:06.050	IT1	0.0622316	8	0.233136
Trial 8	6.3	Rep	F	0:04:06.050-0:04:06.316	IT1	0.07278	8	0.272652
Trial 8	6.3	Rep	F	0:04:06.316-0:04:06.582	IT1	0.0549108	8	0.205709
Trial 8	6.3	Rep	F	0:04:06.582-0:04:06.848	IT1	0.0870014	8	0.325928
Trial 8	6.3	Rep	F	0:04:06.848-0:04:07.114	IT1	0.199466	8	0.747251
Trial 8	6.3	Rep	F	0:04:07.114-0:04:07.380	IT1	0.0998441	7	0.427475
Trial 8	6.3	Rep	F	0:04:07.380-0:04:07.646	IT1	0.31768	8	1.19011
Trial 8	6.3	Rep	F	0:04:07.646-0:04:07.912	IT1	0.153548	8	0.575228
Trial 8	6.3	Rep	F	0:04:07.912-0:04:08.178	IT1	0.201823	8	0.756084
Trial 8	6.3	Rep	F	0:04:08.178-0:04:08.444	IT1	0.0944063	8	0.353669
Trial 8	6.3	Rep	F	0:04:08.444-0:04:08.710	IT1	0.0641484	8	0.240316
Trial 8	6.3	Rep	F	0:04:08.710-0:04:08.976	IT1	0.0471569	8	0.176662
Trial 8	6.3	Rep	F	0:04:08.976-0:04:09.242	IT1	0.0286243	8	0.107234
Trial 8	6.3	Rep	F	0:04:09.242-0:04:09.508	IT1	0.0537173	8	0.201239
Trial 8	6.3	Rep	F	0:04:09.508-0:04:09.774	IT1	0.0328623	8	0.12311
Trial 8	6.3	Rep	F	0:04:09.774-0:04:10.040	IT1	0.056226	8	0.210636
Trial 8	6.3	Rep	F	0:04:10.040-0:04:10.306	IT1	0.140496	8	0.526335
Trial 8	6.3	Rep	F	0:04:10.306-0:04:10.572	IT1	0.167333	8	0.62687
Trial 8	6.3	Rep	F	0:04:10.572-0:04:10.838	IT1	0.128926	8	0.482989
Trial 8	6.3	Rep	F	0:04:10.838-0:04:11.104	IT1	0.260062	8	0.974259
Trial 8	6.3	Rep	F	0:04:11.104-0:04:11.370	IT1	0.0785662	8	0.294328
Trial 8	6.3	Rep	F	0:04:11.370-0:04:11.636	IT1	0.0688003	8	0.257744
Trial 8	6.3	Rep	F	0:04:11.636-0:04:11.902	IT1	0.0440263	8	0.164934
Trial 8	6.3	Rep	F	0:04:11.902-0:04:12.168	IT1	0.100725	8	0.37734
Trial 8	6.3	Rep	F	0:04:12.168-0:04:12.434	IT1	0.140283	8	0.525533
Trial 8	6.3	Rep	F	0:04:12.434-0:04:12.700	IT1	0.115348	8	0.43212
Trial 8	6.3	Rep	F	0:04:12.700-0:04:12.966	IT1	0.0859784	8	0.322096
Trial 8	6.3	Rep	F	0:04:12.966-0:04:13.232	IT1	0.0711269	8	0.266458
Trial 8	6.3	Rep	F	0:04:13.232-0:04:13.498	IT1	0.0560252	8	0.209884
Trial 8	6.3	Rep	F	0:04:13.498-0:04:13.764	IT1	0.146477	8	0.54874
Trial 8	6.3	Rep	F	0:04:13.764-0:04:14.030	IT1	0.225661	8	0.845378
Trial 8	6.3	Rep	F	0:04:14.030-0:04:14.296	IT1	0.151818	8	0.56875
Trial 8	6.3	Rep	F	0:04:14.296-0:04:14.562	IT1	0.171187	8	0.641309
Trial 8	6.3	Rep	F	0:04:14.562-0:04:14.828	IT1	0.148106	8	0.55484
Trial 8	6.3	Rep	F	0:04:14.828-0:04:15.094	IT1	0.229763	8	0.860748
Trial 8	6.3	Rep	F	0:04:15.094-0:04:15.360	IT1	0.164607	8	0.616657
Trial 8	6.3	Rep	F	0:04:15.360-0:04:15.626	IT1	0.190715	8	0.714462
Trial 8	6.3	Rep	F	0:04:15.626-0:04:15.892	IT1	0.128641	8	0.481922
Trial 8	6.3	Rep	F	0:04:15.892-0:04:16.158	IT1	0.290543	8	1.08845
Trial 8	6.3	Rep	F	0:04:16.158-0:04:16.424	IT1	0.291635	8	1.09254
Trial 8	6.3	Rep	F	0:04:16.424-0:04:16.690	IT1	0.10193	7	0.436405
Trial 8	6.3	Rep	F	0:04:16.690-0:04:16.956	IT1	0.0711568	8	0.266571
Trial 8	6.3	Rep	F	0:04:16.956-0:04:17.222	IT1	0.147325	8	0.55192
Trial 8	6.3	Rep	F	0:04:17.222-0:04:17.488	IT1	0.268151	8	1.00456
Trial 8	6.3	Rep	F	0:04:17.488-0:04:17.754	IT1	0.250715	8	0.939242
Trial 8	6.3	Rep	F	0:04:17.754-0:04:18.020	IT1	0.40021	8	1.49928
Trial 8	6.3	Rep	F	0:04:18.020-0:04:18.286	IT1	0.295583	8	1.10733
Trial 8	6.3	Rep	F	0:04:18.286-0:04:18.552	IT1	0.199509	8	0.747416
Trial 8	6.3	Rep	F	0:04:18.552-0:04:18.818	IT1	0.385024	8	1.4424
Trial 8	6.3	Rep	F	0:04:18.818-0:04:19.084	IT1	0.284905	8	1.06733
Trial 8	6.3	Rep	F	0:04:19.084-0:04:19.350	IT1	0.229931	8	0.861379
Trial 8	6.3	Rep	F	0:04:19.350-0:04:19.616	IT1	0.382159	8	1.43166
Trial 8	6.3	Rep	F	0:04:19.616-0:04:19.882	IT1	0.172429	8	0.645963
Trial 8	6.3	Rep	F	0:04:19.882-0:04:20.148	IT1	0.160321	8	0.600601
Trial 8	6.3	Rep	F	0:04:20.148-0:04:20.414	IT1	0.132348	8	0.49581
Trial 8	6.3	Rep	F	0:04:20.414-0:04:20.680	IT1	0.490015	8	1.83571
Trial 8	6.3	Rep	F	0:04:20.680-0:04:20.946	IT1	1.48736	8	5.57202
Trial 8	6.3	Rep	F	0:04:20.946-0:04:21.212	IT1	1.31623	8	4.93091
Trial 8	6.3	Rep	F	0:04:21.212-0:04:21.478	IT1	2.89991	8	10.8638
Trial 8	6.3	Rep	F	0:04:21.478-0:04:21.744	IT1	1.53032	8	5.73297
Trial 8	6.3	Rep	F	0:04:21.744-0:04:22.010	IT1	0.338487	8	1.26805
Trial 8	6.3	Rep	F	0:04:22.010-0:04:22.276	IT1	0.441932	8	1.65559
Trial 8	6.3	Rep	F	0:04:22.276-0:04:22.542	IT1	0.394203	8	1.47679
Trial 8	6.3	Rep	F	0:04:22.542-0:04:22.808	IT1	0.518318	8	1.94175
Trial 8	6.3	Rep	F	0:04:22.808-0:04:23.074	IT1	0.614265	8	2.3012
Trial 8	6.3	Rep	F	0:04:23.074-0:04:23.340	IT1	0.966851	8	3.62206
Trial 8	6.3	Rep	F	0:04:23.340-0:04:23.606	IT1	1.18617	8	4.44369
Trial 8	6.3	Rep	F	0:04:23.606-0:04:23.872	IT1	1.99489	8	7.47336
Trial 8	6.3	Rep	F	0:04:23.872-0:04:24.138	IT1	2.10745	8	7.89504
Trial 8	6.3	Rep	F	0:04:24.138-0:04:24.404	IT1	1.27572	8	4.77917
Trial 8	6.3	Rep	F	0:04:24.404-0:04:24.670	IT1	0.569238	8	2.1325
Trial 8	6.3	Rep	F	0:04:24.670-0:04:24.936	IT1	1.26569	8	4.74157
Trial 8	6.3	Rep	F	0:04:24.936-0:04:25.202	IT1	1.59088	8	5.95983
Trial 8	6.3	Rep	F	0:04:25.202-0:04:25.468	IT1	0.819545	8	3.07021
Trial 8	6.3	Rep	F	0:04:25.468-0:04:25.734	IT1	0.214378	8	0.803118
Trial 8	6.3	Rep	F	0:04:25.734-0:04:26.000	IT1	0.208722	8	0.781923
Trial 8	6.3	Rep	F	0:04:26.000-0:04:26.266	IT1	0.258764	7	1.10788
Trial 8	6.3	Rep	F	0:04:26.266-0:04:26.532	IT1	0.337373	8	1.26389
Trial 8	6.3	Rep	F	0:04:26.532-0:04:26.798	IT1	0.511388	8	1.91578
Trial 8	6.3	Rep	F	0:04:26.798-0:04:27.064	IT1	0.378658	8	1.41855
Trial 8	6.3	Rep	F	0:04:27.064-0:04:27.330	IT1	0.16898	8	0.633041
Trial 8	6.3	Rep	F	0:04:27.330-0:04:27.596	IT1	0.485466	8	1.81868
Trial 8	6.3	Rep	F	0:04:27.596-0:04:27.862	IT1	0.35215	8	1.31925
Trial 8	6.3	Rep	F	0:04:27.862-0:04:28.128	IT1	0.531199	8	1.99
Trial 8	6.3	Rep	F	0:04:28.128-0:04:28.394	IT1	0.414885	8	1.55426
Trial 8	6.3	Rep	F	0:04:28.394-0:04:28.660	IT1	0.421056	8	1.57738
Trial 8	6.3	Rep	F	0:04:28.660-0:04:28.926	IT1	0.636838	8	2.38576
Trial 8	6.3	Rep	F	0:04:28.926-0:04:29.192	IT1	0.262538	8	0.983537
Trial 8	6.3	Rep	F	0:04:29.192-0:04:29.458	IT1	0.233303	8	0.874009
Trial 8	6.3	Rep	F	0:04:29.458-0:04:29.724	IT1	0.337291	8	1.26358
Trial 8	6.3	Rep	F	0:04:29.724-0:04:29.990	IT1	0.682872	8	2.55822
Trial 8	6.3	Rep	F	0:04:29.990-0:04:30.256	IT1	0.618714	8	2.31785
Trial 8	6.3	Rep	F	0:04:30.256-0:04:30.522	IT1	0.532401	8	1.99452
Trial 8	6.3	Rep	F	0:04:30.522-0:04:30.788	IT1	0.29462	8	1.10372
Trial 8	6.3	Rep	F	0:04:30.788-0:04:31.054	IT1	0.615671	8	2.30646
Trial 8	6.3	Rep	F	0:04:31.054-0:04:31.320	IT1	0.354071	8	1.32644
Trial 8	6.3	Rep	F	0:04:31.320-0:04:31.586	IT1	0.344233	8	1.28958
Trial 8	6.3	Rep	F	0:04:31.586-0:04:31.852	IT1	0.386865	8	1.4493
Trial 8	6.3	Rep	F	0:04:31.852-0:04:32.118	IT1	0.825134	8	3.09116
Trial 8	6.3	Rep	F	0:04:32.118-0:04:32.384	IT1	0.308405	8	1.15536
Trial 8	6.3	Rep	F	0:04:32.384-0:04:32.650	IT1	1.09891	8	4.11679
Trial 8	6.3	Rep	F	0:04:32.650-0:04:32.916	IT1	1.09528	8	4.10322
Trial 8	6.3	Rep	F	0:04:32.916-0:04:33.182	IT1	1.39583	8	5.22918
Trial 8	6.3	Rep	F	0:04:33.182-0:04:33.448	IT1	0.966292	8	3.61995
Trial 8	6.3	Rep	F	0:04:33.448-0:04:33.714	IT1	1.44375	8	5.40867
Trial 8	6.3	Rep	F	0:04:33.714-0:04:33.980	IT1	1.04401	8	3.91117
Trial 8	6.3	Rep	F	0:04:33.980-0:04:34.246	IT1	0.218877	8	0.819969
Trial 8	6.3	Rep	F	0:04:34.246-0:04:34.512	IT1	0.261809	8	0.980805
Trial 8	6.3	Rep	F	0:04:34.512-0:04:34.778	IT1	0.743465	8	2.7852
Trial 8	6.3	Rep	F	0:04:34.778-0:04:35.044	IT1	1.51818	8	5.68747
Trial 8	6.3	Rep	F	0:04:35.044-0:04:35.310	IT1	1.51818	8	5.68749
Trial 8	6.3	Rep	F	0:04:35.310-0:04:35.576	IT1	1.51818	8	5.68747
Trial 8	6.3	Rep	F	0:04:35.576-0:04:35.842	IT1	1.14462	7	4.90062
Trial 8	6.3	Rep	F	0:04:35.842-0:04:36.108	IT1	0.874613	8	3.27653
Trial 8	6.3	Rep	F	0:04:36.108-0:04:36.374	IT1	0.874613	8	3.27651
Trial 8	6.3	Rep	F	0:04:36.374-0:04:36.640	IT1	0.874613	8	3.27651
Trial 8	6.3	Rep	F	0:04:36.640-0:04:36.906	IT1	1.82724	8	6.84532
Trial 8	6.3	Rep	F	0:04:36.906-0:04:37.172	IT1	2.66726	8	9.99227
Trial 8	6.3	Rep	F	0:04:37.172-0:04:37.438	IT1	4.1532	8	15.5589
Trial 8	6.3	Rep	F	0:04:37.438-0:04:37.704	IT1	3.08139	8	11.5436
Trial 8	6.3	Rep	F	0:04:37.704-0:04:37.970	IT1	3.01966	8	11.3124
Trial 8	6.3	Rep	F	0:04:37.970-0:04:38.236	IT1	2.49791	8	9.35783
Trial 8	6.3	Rep	F	0:04:38.236-0:04:38.502	IT1	1.33824	8	5.01336
Trial 8	6.3	Rep	F	0:04:38.502-0:04:38.768	IT1	1.32607	8	4.96778
Trial 8	6.3	Rep	F	0:04:38.768-0:04:39.034	IT1	2.27606	8	8.52669
Trial 8	6.3	Rep	F	0:04:39.034-0:04:39.300	IT1	3.5702	8	13.3748
Trial 8	6.3	Rep	F	0:04:39.300-0:04:39.566	IT1	4.24651	8	15.9085
Trial 8	6.3	Rep	F	0:04:39.566-0:04:39.832	IT1	2.30325	8	8.62853
Trial 8	6.3	Rep	F	0:04:39.832-0:04:40.098	IT1	1.02514	8	3.84043
Trial 8	6.3	Rep	F	0:04:40.098-0:04:40.364	IT1	0.436869	8	1.63662
Trial 8	6.3	Rep	F	0:04:40.364-0:04:40.630	IT1	0.379936	8	1.42333
Trial 8	6.3	Rep	F	0:04:40.630-0:04:40.896	IT1	0.658771	8	2.46794
Trial 8	6.3	Rep	F	0:04:40.896-0:04:41.162	IT1	0.710215	8	2.66063
Trial 8	6.3	Rep	F	0:04:41.162-0:04:41.428	IT1	0.467146	8	1.75006
Trial 8	6.3	Rep	F	0:04:41.428-0:04:41.694	IT1	0.478645	8	1.79312
Trial 8	6.3	Rep	F	0:04:41.694-0:04:41.960	IT1	0.480613	8	1.8005
Trial 8	6.3	Rep	F	0:04:41.960-0:04:42.226	IT1	0.331495	8	1.24187
Trial 8	6.3	Rep	F	0:04:42.226-0:04:42.492	IT1	0.7305	8	2.73663
Trial 8	6.3	Rep	F	0:04:42.492-0:04:42.758	IT1	0.62416	8	2.33826
Trial 8	6.3	Rep	F	0:04:42.758-0:04:43.024	IT1	0.849222	8	3.18138
Trial 8	6.3	Rep	F	0:04:43.024-0:04:43.290	IT1	0.413077	8	1.54749
Trial 8	6.3	Rep	F	0:04:43.290-0:04:43.556	IT1	0.61181	8	2.29199
Trial 8	6.3	Rep	F	0:04:43.556-0:04:43.822	IT1	0.185603	8	0.695313
Trial 8	6.3	Rep	F	0:04:43.822-0:04:44.088	IT1	1.26224	8	4.72868
Trial 8	6.3	Rep	F	0:04:44.088-0:04:44.354	IT1	1.43197	8	5.36457
Trial 8	6.3	Rep	F	0:04:44.354-0:04:44.620	IT1	0.605959	8	2.27007
Trial 8	6.3	Rep	F	0:04:44.620-0:04:44.886	IT1	0.277688	8	1.04029
Trial 8	6.3	Rep	F	0:04:44.886-0:04:45.152	IT1	0.209994	8	0.786691
Trial 8	6.3	Rep	F	0:04:45.152-0:04:45.418	IT1	0.216869	7	0.92851
Trial 8	6.3	Rep	F	0:04:45.418-0:04:45.684	IT1	1.09433	8	4.09963
Trial 8	6.3	Rep	F	0:04:45.684-0:04:45.950	IT1	0.40026	8	1.49947
Trial 8	6.3	Rep	F	0:04:45.950-0:04:46.216	IT1	0.965109	8	3.61557
Trial 8	6.3	Rep	F	0:04:46.216-0:04:46.482	IT1	0.791793	8	2.96625
Trial 8	6.3	Rep	F	0:04:46.482-0:04:46.748	IT1	0.329529	8	1.2345
Trial 8	6.3	Rep	F	0:04:46.748-0:04:47.014	IT1	0.343928	8	1.28844
Trial 8	6.3	Rep	F	0:04:47.014-0:04:47.280	IT1	0.169429	8	0.634722
Trial 8	6.3	Rep	F	0:04:47.280-0:04:47.546	IT1	0.370879	8	1.38941
Trial 8	6.3	Rep	F	0:04:47.546-0:04:47.812	IT1	0.161295	8	0.604247
Trial 8	6.3	Rep	F	0:04:47.812-0:04:48.078	IT1	0.0941662	8	0.352769
Trial 8	6.3	Rep	F	0:04:48.078-0:04:48.344	IT1	0.130149	8	0.487573
Trial 8	6.3	Rep	F	0:04:48.344-0:04:48.610	IT1	0.400655	8	1.50095
Trial 8	6.3	Rep	F	0:04:48.610-0:04:48.876	IT1	0.282411	8	1.05798
Trial 8	6.3	Rep	F	0:04:48.876-0:04:49.142	IT1	0.164017	8	0.614448
Trial 8	6.3	Rep	F	0:04:49.142-0:04:49.408	IT1	0.166778	8	0.624791
Trial 8	6.3	Rep	F	0:04:49.408-0:04:49.674	IT1	0.586379	8	2.19672
Trial 8	6.3	Rep	F	0:04:49.674-0:04:49.940	IT1	0.314928	8	1.1798
Trial 8	6.3	Rep	F	0:04:49.940-0:04:50.206	IT1	0.272116	8	1.01942
Trial 8	6.3	Rep	F	0:04:50.206-0:04:50.472	IT1	0.18648	8	0.698603
Trial 8	6.3	Rep	F	0:04:50.472-0:04:50.738	IT1	0.121924	8	0.456755
Trial 8	6.3	Rep	F	0:04:50.738-0:04:51.004	IT1	0.0752981	8	0.282086
Trial 8	6.3	Rep	F	0:04:51.004-0:04:51.270	IT1	0.964111	8	3.6118
Trial 8	6.3	Rep	F	0:04:51.270-0:04:51.536	IT1	1.27581	8	4.77953
Trial 8	6.3	Rep	F	0:04:51.536-0:04:51.802	IT1	1.52924	8	5.7289
Trial 8	6.3	Rep	F	0:04:51.802-0:04:52.068	IT1	0.469568	8	1.75912
Trial 8	6.3	Rep	F	0:04:52.068-0:04:52.334	IT1	0.503106	8	1.88476
Trial 8	6.3	Rep	F	0:04:52.334-0:04:52.600	IT1	0.409006	8	1.53223
Trial 8	6.3	Rep	F	0:04:52.600-0:04:52.866	IT1	0.652458	8	2.44428
Trial 8	6.3	Rep	F	0:04:52.866-0:04:53.132	IT1	1.26889	8	4.75356
Trial 8	6.3	Rep	F	0:04:53.132-0:04:53.398	IT1	1.23227	8	4.61638
Trial 8	6.3	Rep	F	0:04:53.398-0:04:53.664	IT1	1.6551	8	6.20043
Trial 8	6.3	Rep	F	0:04:53.664-0:04:53.930	IT1	1.34538	8	5.04013
Trial 8	6.3	Rep	F	0:04:53.930-0:04:54.196	IT1	1.37133	8	5.13737
Trial 8	6.3	Rep	F	0:04:54.196-0:04:54.462	IT1	1.02381	8	3.83545
Trial 8	6.3	Rep	F	0:04:54.462-0:04:54.728	IT1	0.575519	7	2.46404
Trial 8	6.3	Rep	F	0:04:54.728-0:04:54.994	IT1	1.85837	8	6.9619
Trial 8	6.3	Rep	F	0:04:54.994-0:04:55.260	IT1	1.14814	8	4.30123
Trial 8	6.3	Rep	F	0:04:55.260-0:04:55.526	IT1	0.298229	8	1.11723
Trial 8	6.3	Rep	F	0:04:55.526-0:04:55.792	IT1	0.189342	8	0.709324
Trial 8	6.3	Rep	F	0:04:55.792-0:04:56.058	IT1	0.339345	8	1.27127
Trial 8	6.3	Rep	F	0:04:56.058-0:04:56.324	IT1	0.896601	8	3.35888
Trial 8	6.3	Rep	F	0:04:56.324-0:04:56.590	IT1	1.02586	8	3.84314
Trial 8	6.3	Rep	F	0:04:56.590-0:04:56.856	IT1	1.30845	8	4.90177
Trial 8	6.3	Rep	F	0:04:56.856-0:04:57.122	IT1	2.14895	8	8.05053
Trial 8	6.3	Rep	F	0:04:57.122-0:04:57.388	IT1	1.86657	8	6.99264
Trial 8	6.3	Rep	F	0:04:57.388-0:04:57.654	IT1	1.08543	8	4.06629
Trial 8	6.3	Rep	F	0:04:57.654-0:04:57.920	IT1	0.552274	8	2.06896
Trial 8	6.3	Rep	F	0:04:57.920-0:04:58.186	IT1	0.786273	8	2.94557
Trial 8	6.3	Rep	F	0:04:58.186-0:04:58.452	IT1	0.550655	8	2.0629
Trial 8	6.3	Rep	F	0:04:58.452-0:04:58.718	IT1	0.274538	8	1.02849
Trial 8	6.3	Rep	F	0:04:58.718-0:04:58.984	IT1	0.39452	8	1.47797
Trial 8	6.3	Rep	F	0:04:58.984-0:04:59.250	IT1	0.398868	8	1.49426
Trial 8	6.3	Rep	F	0:04:59.250-0:04:59.516	IT1	0.384734	8	1.44131
Trial 8	6.3	Rep	F	0:04:59.516-0:04:59.782	IT1	0.251267	8	0.941311
Trial 8	6.3	Rep	F	0:04:59.782-0:05:00.048	IT1	0.469754	8	1.75981
Trial 8	6.3	Rep	F	0:05:00.048-0:05:00.314	IT1	0.57329	8	2.14769
Trial 8	6.3	Rep	F	0:05:00.314-0:05:00.580	IT1	0.274655	8	1.02893
Trial 8	6.3	Rep	F	0:05:00.580-0:05:00.846	IT1	0.460918	8	1.72671
Trial 8	6.3	Rep	F	0:05:00.846-0:05:01.112	IT1	0.27668	8	1.03652
Trial 8	6.3	Rep	F	0:05:01.112-0:05:01.378	IT1	0.0968248	8	0.362728
Trial 8	6.3	Rep	F	0:05:01.378-0:05:01.644	IT1	0.349916	8	1.31087
Trial 8	6.3	Rep	F	0:05:01.644-0:05:01.910	IT1	0.232735	8	0.871888
Trial 8	6.3	Rep	F	0:05:01.910-0:05:02.176	IT1	0.404991	8	1.5172
Trial 8	6.3	Rep	F	0:05:02.176-0:05:02.442	IT1	0.543269	8	2.03523
Trial 8	6.3	Rep	F	0:05:02.442-0:05:02.708	IT1	0.675732	8	2.53146
Trial 8	6.3	Rep	F	0:05:02.708-0:05:02.974	IT1	2.05823	8	7.7106
Trial 8	6.3	Rep	F	0:05:02.974-0:05:03.240	IT1	1.57961	8	5.91765
Trial 8	6.3	Rep	F	0:05:03.240-0:05:03.506	IT1	0.53644	8	2.00963
Trial 8	6.3	Rep	F	0:05:03.506-0:05:03.772	IT1	0.210792	8	0.78968
Trial 8	6.3	Rep	F	0:05:03.772-0:05:04.038	IT1	0.148925	8	0.557908
Trial 8	6.3	Rep	F	0:05:04.038-0:05:04.304	IT1	0.151751	7	0.649712
Trial 8	6.3	Rep	F	0:05:04.304-0:05:04.570	IT1	0.37715	8	1.41291
Trial 8	6.3	Rep	F	0:05:04.570-0:05:04.836	IT1	0.546049	8	2.04564
Trial 8	6.3	Rep	F	0:05:04.836-0:05:05.102	IT1	2.12131	8	7.94693
Trial 8	6.3	Rep	F	0:05:05.102-0:05:05.368	IT1	1.0886	8	4.07818
Trial 8	6.3	Rep	F	0:05:05.368-0:05:05.634	IT1	0.260115	8	0.974452
Trial 8	6.3	Rep	F	0:05:05.634-0:05:05.900	IT1	0.208523	8	0.781182
Trial 8	6.3	Rep	F	0:05:05.900-0:05:06.166	IT1	0.149773	8	0.561085
Trial 8	6.3	Rep	F	0:05:06.166-0:05:06.432	IT1	0.259623	8	0.972608
Trial 8	6.3	Rep	F	0:05:06.432-0:05:06.698	IT1	0.442967	8	1.65947
Trial 8	6.3	Rep	F	0:05:06.698-0:05:06.964	IT1	0.389507	8	1.45918
Trial 8	6.3	Rep	F	0:05:06.964-0:05:07.230	IT1	0.646699	8	2.4227
Trial 8	6.3	Rep	F	0:05:07.230-0:05:07.496	IT1	0.237577	8	0.89002
Trial 8	6.3	Rep	F	0:05:07.496-0:05:07.762	IT1	0.301975	8	1.13127
Trial 8	6.3	Rep	F	0:05:07.762-0:05:08.028	IT1	0.921222	8	3.45113
Trial 8	6.3	Rep	F	0:05:08.028-0:05:08.294	IT1	1.08848	8	4.07772
Trial 8	6.3	Rep	F	0:05:08.294-0:05:08.560	IT1	1.22889	8	4.60373
Trial 8	6.3	Rep	F	0:05:08.560-0:05:08.826	IT1	2.0528	8	7.69031
Trial 8	6.3	Rep	F	0:05:08.826-0:05:09.092	IT1	2.60409	8	9.75558
Trial 8	6.3	Rep	F	0:05:09.092-0:05:09.358	IT1	1.72653	8	6.46802
Trial 8	6.3	Rep	F	0:05:09.358-0:05:09.624	IT1	0.600098	8	2.24811
Trial 8	6.3	Rep	F	0:05:09.624-0:05:09.890	IT1	0.434228	8	1.62673
Trial 8	6.3	Rep	F	0:05:09.890-0:05:10.156	IT1	0.283397	8	1.06167
Trial 8	6.3	Rep	F	0:05:10.156-0:05:10.422	IT1	0.467962	8	1.7531
Trial 8	6.3	Rep	F	0:05:10.422-0:05:10.688	IT1	0.997571	8	3.73716
Trial 8	6.3	Rep	F	0:05:10.688-0:05:10.954	IT1	1.42043	8	5.32129
Trial 8	6.3	Rep	F	0:05:10.954-0:05:11.220	IT1	0.567966	8	2.12775
Trial 8	6.3	Rep	F	0:05:11.220-0:05:11.486	IT1	0.431453	8	1.61633
Trial 8	6.3	Rep	F	0:05:11.486-0:05:11.752	IT1	2.00556	8	7.51331
Trial 8	6.3	Rep	F	0:05:11.752-0:05:12.018	IT1	1.28586	8	4.81718
Trial 8	6.3	Rep	F	0:05:12.018-0:05:12.284	IT1	0.844529	8	3.16381
Trial 8	6.3	Rep	F	0:05:12.284-0:05:12.550	IT1	1.82493	8	6.83666
Trial 8	6.3	Rep	F	0:05:12.550-0:05:12.816	IT1	1.0851	8	4.06505
Trial 8	6.3	Rep	F	0:05:12.816-0:05:13.082	IT1	0.580009	8	2.17286
Trial 8	6.3	Rep	F	0:05:13.082-0:05:13.348	IT1	0.42744	8	1.6013
Trial 8	6.3	Rep	F	0:05:13.348-0:05:13.614	IT1	0.481593	8	1.80417
Trial 8	6.3	Rep	F	0:05:13.614-0:05:13.880	IT1	0.27866	7	1.19306
Trial 8	6.3	Rep	F	0:05:13.880-0:05:14.146	IT1	0.396312	8	1.48469
Trial 8	6.3	Rep	F	0:05:14.146-0:05:14.412	IT1	0.266667	8	0.999005
Trial 8	6.3	Rep	F	0:05:14.412-0:05:14.678	IT1	0.539888	8	2.02255
Trial 8	6.3	Rep	F	0:05:14.678-0:05:14.944	IT1	0.631226	8	2.36474
Trial 8	6.3	Rep	F	0:05:14.944-0:05:15.210	IT1	0.526017	8	1.97059
Trial 8	6.3	Rep	F	0:05:15.210-0:05:15.476	IT1	2.08579	8	7.81391
Trial 8	6.3	Rep	F	0:05:15.476-0:05:15.742	IT1	2.11878	8	7.93753
Trial 8	6.3	Rep	F	0:05:15.742-0:05:16.008	IT1	0.492244	8	1.84407
Trial 8	6.3	Rep	F	0:05:16.008-0:05:16.274	IT1	0.929843	8	3.48344
Trial 8	6.3	Rep	F	0:05:16.274-0:05:16.540	IT1	1.46766	8	5.49825
Trial 8	6.3	Rep	F	0:05:16.540-0:05:16.806	IT1	0.680544	8	2.54949
Trial 8	6.3	Rep	F	0:05:16.806-0:05:17.072	IT1	0.452377	8	1.69472
Trial 8	6.3	Rep	F	0:05:17.072-0:05:17.338	IT1	0.75152	8	2.81538
Trial 8	6.3	Rep	F	0:05:17.338-0:05:17.604	IT1	0.221431	8	0.829541
Trial 8	6.3	Rep	F	0:05:17.604-0:05:17.870	IT1	0.178666	8	0.669324
Trial 8	6.3	Rep	F	0:05:17.870-0:05:18.136	IT1	0.130886	8	0.490331
Trial 8	6.3	Rep	F	0:05:18.136-0:05:18.402	IT1	0.199194	8	0.746228
Trial 8	6.3	Rep	F	0:05:18.402-0:05:18.668	IT1	0.231985	8	0.86907
Trial 8	6.3	Rep	F	0:05:18.668-0:05:18.934	IT1	0.220028	8	0.824281
Trial 8	6.3	Rep	F	0:05:18.934-0:05:19.200	IT1	0.0876595	8	0.328393
Trial 8	6.3	Rep	F	0:05:19.200-0:05:19.466	IT1	0.033929	8	0.127106
Trial 8	6.3	Rep	F	0:05:19.466-0:05:19.732	IT1	0.247392	8	0.92679
Trial 8	6.3	Rep	F	0:05:19.732-0:05:19.998	IT1	0.362724	8	1.35885
Trial 8	6.3	Rep	F	0:05:19.998-0:05:20.264	IT1	0.548858	8	2.05616
Trial 8	6.3	Rep	F	0:05:20.264-0:05:20.530	IT1	0.215483	8	0.80725
Trial 8	6.3	Rep	F	0:05:20.530-0:05:20.796	IT1	0.330024	8	1.23636
Trial 8	6.3	Rep	F	0:05:20.796-0:05:21.062	IT1	0.390536	8	1.46305
Trial 8	6.3	Rep	F	0:05:21.062-0:05:21.328	IT1	0.162671	8	0.609403
Trial 8	6.3	Rep	F	0:05:21.328-0:05:21.594	IT1	0.315543	8	1.1821
Trial 8	6.3	Rep	F	0:05:21.594-0:05:21.860	IT1	1.02425	8	3.8371
Trial 8	6.3	Rep	F	0:05:21.860-0:05:22.126	IT1	0.794797	8	2.9775
Trial 8	6.3	Rep	F	0:05:22.126-0:05:22.392	IT1	0.275926	8	1.03369
Trial 8	6.3	Rep	F	0:05:22.392-0:05:22.658	IT1	0.275926	8	1.03369
Trial 8	6.3	Rep	F	0:05:22.658-0:05:22.924	IT1	0.275926	8	1.03369
Trial 8	6.3	Rep	F	0:05:22.924-0:05:23.190	IT1	0.275926	8	1.03369
Trial 8	6.3	Rep	F	0:05:23.190-0:05:23.456	IT1	0.241435	7	1.03369
Trial 8	6.3	Rep	F	0:05:23.456-0:05:23.722	IT1	1.67818	8	6.28688
Trial 8	6.3	Rep	F	0:05:23.722-0:05:23.988	IT1	1.4452	8	5.41407
Trial 8	6.3	Rep	F	0:05:23.988-0:05:24.254	IT1	1.18468	8	4.43811
Trial 8	6.3	Rep	F	0:05:24.254-0:05:24.520	IT1	0.947773	8	3.55059
Trial 8	6.3	Rep	F	0:05:24.520-0:05:24.786	IT1	0.300191	8	1.12458
Trial 8	6.3	Rep	F	0:05:24.786-0:05:25.052	IT1	0.147327	8	0.551925
Trial 8	6.3	Rep	F	0:05:25.052-0:05:25.318	IT1	0.273434	8	1.02435
Trial 8	6.3	Rep	F	0:05:25.318-0:05:25.584	IT1	0.173703	8	0.650735
Trial 8	6.3	Rep	F	0:05:25.584-0:05:25.850	IT1	0.100611	8	0.376915
Trial 8	6.3	Rep	F	0:05:25.850-0:05:26.116	IT1	1.12644	8	4.21991
Trial 8	6.3	Rep	F	0:05:26.116-0:05:26.382	IT1	1.98355	8	7.43091
Trial 8	6.3	Rep	F	0:05:26.382-0:05:26.648	IT1	0.498497	8	1.86749
Trial 8	6.3	Rep	F	0:05:26.648-0:05:26.914	IT1	0.458296	8	1.7169
Trial 8	6.3	Rep	F	0:05:26.914-0:05:27.180	IT1	1.03971	8	3.89501
Trial 8	6.3	Rep	F	0:05:27.180-0:05:27.446	IT1	0.27722	8	1.03853
Trial 8	6.3	Rep	F	0:05:27.446-0:05:27.712	IT1	0.0929007	8	0.348032
Trial 8	6.3	Rep	F	0:05:27.712-0:05:27.978	IT1	0.106173	8	0.39775
Trial 8	6.3	Rep	F	0:05:27.978-0:05:28.244	IT1	0.691625	8	2.59101
Trial 8	6.3	Rep	F	0:05:28.244-0:05:28.510	IT1	0.559033	8	2.09427
Trial 8	6.3	Rep	F	0:05:28.510-0:05:28.776	IT1	0.905925	8	3.39381
Trial 8	6.3	Rep	F	0:05:28.776-0:05:29.042	IT1	2.223	8	8.32793
Trial 8	6.3	Rep	F	0:05:29.042-0:05:29.308	IT1	1.84195	8	6.90041
Trial 8	6.3	Rep	F	0:05:29.308-0:05:29.574	IT1	0.83463	8	3.12674
Trial 8	6.3	Rep	F	0:05:29.574-0:05:29.840	IT1	0.334799	8	1.25424
Trial 8	6.3	Rep	F	0:05:29.840-0:05:30.106	IT1	0.318408	8	1.19284
Trial 8	6.3	Rep	F	0:05:30.106-0:05:30.372	IT1	0.389545	8	1.45933
Trial 8	6.3	Rep	F	0:05:30.372-0:05:30.638	IT1	0.328256	8	1.22973
Trial 8	6.3	Rep	F	0:05:30.638-0:05:30.904	IT1	0.495681	8	1.85694
Trial 8	6.3	Rep	F	0:05:30.904-0:05:31.170	IT1	1.14251	8	4.28013
Trial 8	6.3	Rep	F	0:05:31.170-0:05:31.436	IT1	1.04122	8	3.90068
Trial 8	6.3	Rep	F	0:05:31.436-0:05:31.702	IT1	0.597028	8	2.23661
Trial 8	6.3	Rep	F	0:05:31.702-0:05:31.968	IT1	0.936945	8	3.51002
Trial 8	6.3	Rep	F	0:05:31.968-0:05:32.234	IT1	1.8652	8	6.98751
Trial 8	6.3	Rep	F	0:05:32.234-0:05:32.500	IT1	0.568008	8	2.12789
Trial 8	6.3	Rep	F	0:05:32.500-0:05:32.766	IT1	0.776147	7	3.32301
Trial 8	6.3	Rep	F	0:05:32.766-0:05:33.032	IT1	6.18186	8	23.1588
Trial 8	6.3	Rep	F	0:05:33.032-0:05:33.298	IT1	5.43469	8	20.3598
Trial 8	6.3	Rep	F	0:05:33.298-0:05:33.564	IT1	0.251984	8	0.943992
Trial 8	6.3	Rep	F	0:05:33.564-0:05:33.830	IT1	0.177975	8	0.666742
Trial 8	6.3	Rep	F	0:05:33.830-0:05:34.096	IT1	0.177975	8	0.666739
Trial 8	6.3	Rep	F	0:05:34.096-0:05:34.362	IT1	0.177975	8	0.666739
Trial 8	6.3	Rep	F	0:05:34.362-0:05:34.628	IT1	0.177975	8	0.666742
Trial 8	6.3	Rep	F	0:05:34.628-0:05:34.894	IT1	0.346864	8	1.29943
Trial 8	6.3	Rep	F	0:05:34.894-0:05:35.160	IT1	3.62038	8	13.5629
Trial 8	6.3	Rep	F	0:05:35.160-0:05:35.426	IT1	1.84008	8	6.89338
Trial 8	6.3	Rep	F	0:05:35.426-0:05:35.692	IT1	2.83563	8	10.623
Trial 8	6.3	Rep	F	0:05:35.692-0:05:35.958	IT1	3.76008	8	14.0862
Trial 8	6.3	Rep	F	0:05:35.958-0:05:36.224	IT1	3.27332	8	12.2627
Trial 8	6.3	Rep	F	0:05:36.224-0:05:36.490	IT1	1.62804	8	6.09905
Trial 8	6.3	Rep	F	0:05:36.490-0:05:36.756	IT1	0.329521	8	1.23446
Trial 8	6.3	Rep	F	0:05:36.756-0:05:37.022	IT1	0.202929	8	0.760221
Trial 8	6.3	Rep	F	0:05:37.022-0:05:37.288	IT1	0.228388	8	0.855597
Trial 8	6.3	Rep	F	0:05:37.288-0:05:37.554	IT1	0.513479	8	1.92362
Trial 8	6.3	Rep	F	0:05:37.554-0:05:37.820	IT1	0.365993	8	1.3711
Trial 8	6.3	Rep	F	0:05:37.820-0:05:38.086	IT1	0.314936	8	1.17982
Trial 8	6.3	Rep	F	0:05:38.086-0:05:38.352	IT1	1.79243	8	6.71489
Trial 8	6.3	Rep	F	0:05:38.352-0:05:38.618	IT1	1.8597	8	6.9669
Trial 8	6.3	Rep	F	0:05:38.618-0:05:38.884	IT1	1.58938	8	5.9542
Trial 8	6.3	Rep	F	0:05:38.884-0:05:39.150	IT1	1.11334	8	4.17087
Trial 8	6.3	Rep	F	0:05:39.150-0:05:39.416	IT1	2.23301	8	8.36539
Trial 8	6.3	Rep	F	0:05:39.416-0:05:39.682	IT1	0.71884	8	2.69296
Trial 8	6.3	Rep	F	0:05:39.682-0:05:39.948	IT1	0.388481	8	1.45535
Trial 8	6.3	Rep	F	0:05:39.948-0:05:40.214	IT1	0.597561	8	2.23861
Trial 8	6.3	Rep	F	0:05:40.214-0:05:40.480	IT1	0.779316	8	2.91952
Trial 8	6.3	Rep	F	0:05:40.480-0:05:40.746	IT1	0.909001	8	3.40534
Trial 8	6.3	Rep	F	0:05:40.746-0:05:41.012	IT1	1.13499	8	4.25196
Trial 8	6.3	Rep	F	0:05:41.012-0:05:41.278	IT1	1.17288	8	4.3939
Trial 8	6.3	Rep	F	0:05:41.278-0:05:41.544	IT1	0.565267	8	2.11762
Trial 8	6.3	Rep	F	0:05:41.544-0:05:41.810	IT1	0.68654	8	2.57196
Trial 8	6.3	Rep	F	0:05:41.810-0:05:42.076	IT1	1.56167	8	5.85041
Trial 8	6.3	Rep	F	0:05:42.076-0:05:42.342	IT1	1.29328	7	5.53708
Trial 8	6.3	Rep	F	0:05:42.342-0:05:42.608	IT1	1.18538	8	4.44071
Trial 8	6.3	Rep	F	0:05:42.608-0:05:42.874	IT1	0.34356	8	1.28705
Trial 8	6.3	Rep	F	0:05:42.874-0:05:43.140	IT1	0.279492	8	1.04704
Trial 8	6.3	Rep	F	0:05:43.140-0:05:43.406	IT1	0.204645	8	0.766655
Trial 8	6.3	Rep	F	0:05:43.406-0:05:43.672	IT1	0.6316	8	2.36613
Trial 8	6.3	Rep	F	0:05:43.672-0:05:43.938	IT1	0.31121	8	1.16588
Trial 8	6.3	Rep	F	0:05:43.938-0:05:44.204	IT1	0.202759	8	0.759589
Trial 8	6.3	Rep	F	0:05:44.204-0:05:44.470	IT1	0.0919938	8	0.344632
Trial 8	6.3	Rep	F	0:05:44.470-0:05:44.736	IT1	0.68064	8	2.54985
Trial 8	6.3	Rep	F	0:05:44.736-0:05:45.002	IT1	0.892173	8	3.34231
Trial 8	6.3	Rep	F	0:05:45.002-0:05:45.268	IT1	1.8867	8	7.06807
Trial 8	6.3	Rep	F	0:05:45.268-0:05:45.534	IT1	2.15897	8	8.08804
Trial 8	6.3	Rep	F	0:05:45.534-0:05:45.800	IT1	0.317131	8	1.18805
Trial 8	6.3	Rep	F	0:05:45.800-0:05:46.066	IT1	0.383083	8	1.43512
Trial 8	6.3	Rep	F	0:05:46.066-0:05:46.332	IT1	0.119678	8	0.44834
Trial 8	6.3	Rep	F	0:05:46.332-0:05:46.598	IT1	0.12046	8	0.451274
Trial 8	6.3	Rep	F	0:05:46.598-0:05:46.864	IT1	0.0580213	8	0.217362
Trial 8	6.3	Rep	F	0:05:46.864-0:05:47.130	IT1	0.158013	8	0.591953
Trial 8	6.3	Rep	F	0:05:47.130-0:05:47.396	IT1	0.787157	8	2.9489
Trial 8	6.3	Rep	F	0:05:47.396-0:05:47.662	IT1	3.19099	8	11.9542
Trial 8	6.3	Rep	F	0:05:47.662-0:05:47.928	IT1	2.89589	8	10.8488
Trial 8	6.3	Rep	F	0:05:47.928-0:05:48.194	IT1	1.22977	8	4.607
Trial 8	6.3	Rep	F	0:05:48.194-0:05:48.460	IT1	0.550798	8	2.06342
Trial 8	6.3	Rep	F	0:05:48.460-0:05:48.726	IT1	1.18866	8	4.45302
Trial 8	6.3	Rep	F	0:05:48.726-0:05:48.992	IT1	2.75408	8	10.3175
Trial 8	6.3	Rep	F	0:05:48.992-0:05:49.258	IT1	3.20827	8	12.019
Trial 8	6.3	Rep	F	0:05:49.258-0:05:49.524	IT1	1.92047	8	7.19454
Trial 8	6.3	Rep	F	0:05:49.524-0:05:49.790	IT1	0.872057	8	3.26695
Trial 8	6.3	Rep	F	0:05:49.790-0:05:50.056	IT1	0.809607	8	3.033
Trial 8	6.3	Rep	F	0:05:50.056-0:05:50.322	IT1	0.303321	8	1.13632
Trial 8	6.3	Rep	F	0:05:50.322-0:05:50.588	IT1	0.293913	8	1.10107
Trial 8	6.3	Rep	F	0:05:50.588-0:05:50.854	IT1	0.157474	8	0.589939
Trial 8	6.3	Rep	F	0:05:50.854-0:05:51.120	IT1	0.307533	8	1.15209
Trial 8	6.3	Rep	F	0:05:51.120-0:05:51.386	IT1	0.11214	8	0.420105
Trial 8	6.3	Rep	F	0:05:51.386-0:05:51.652	IT1	0.0860165	8	0.322238
Trial 8	6.3	Rep	F	0:05:51.652-0:05:51.918	IT1	0.0807263	7	0.345623
Trial 8	6.3	Rep	F	0:05:51.918-0:05:52.184	IT1	0.146557	8	0.549037
Trial 8	6.3	Rep	F	0:05:52.184-0:05:52.450	IT1	0.193881	8	0.726327
Trial 8	6.3	Rep	F	0:05:52.450-0:05:52.716	IT1	0.272681	8	1.02153
Trial 8	6.3	Rep	F	0:05:52.716-0:05:52.982	IT1	0.250868	8	0.939816
Trial 8	6.3	Rep	F	0:05:52.982-0:05:53.248	IT1	0.339601	8	1.27222
Trial 8	6.3	Rep	F	0:05:53.248-0:05:53.514	IT1	0.382366	8	1.43245
Trial 8	6.3	Rep	F	0:05:53.514-0:05:53.780	IT1	0.195856	8	0.733724
Trial 8	6.3	Rep	F	0:05:53.780-0:05:54.046	IT1	0.280954	8	1.05252
Trial 8	6.3	Rep	F	0:05:54.046-0:05:54.312	IT1	0.348519	8	1.30565
Trial 8	6.3	Rep	F	0:05:54.312-0:05:54.578	IT1	0.20648	8	0.773523
Trial 8	6.3	Rep	F	0:05:54.578-0:05:54.844	IT1	0.215498	8	0.807311
Trial 8	6.3	Rep	F	0:05:54.844-0:05:55.110	IT1	0.329722	8	1.23522
Trial 8	6.3	Rep	F	0:05:55.110-0:05:55.376	IT1	0.170546	8	0.638904
Trial 8	6.3	Rep	F	0:05:55.376-0:05:55.642	IT1	0.127279	8	0.47682
Trial 8	6.3	Rep	F	0:05:55.642-0:05:55.908	IT1	0.160216	8	0.600211
Trial 8	6.3	Rep	F	0:05:55.908-0:05:56.174	IT1	0.0912818	8	0.341968
Trial 8	6.3	Rep	F	0:05:56.174-0:05:56.440	IT1	0.0487387	8	0.182587
Trial 8	6.3	Rep	F	0:05:56.440-0:05:56.706	IT1	0.155122	8	0.581124
Trial 8	6.3	Rep	F	0:05:56.706-0:05:56.972	IT1	0.253898	8	0.951169
Trial 8	6.3	Rep	F	0:05:56.972-0:05:57.238	IT1	0.20333	8	0.76172
Trial 8	6.3	Rep	F	0:05:57.238-0:05:57.504	IT1	0.0764616	8	0.286443
Trial 8	6.3	Rep	F	0:05:57.504-0:05:57.770	IT1	0.119725	8	0.448519
Trial 8	6.3	Rep	F	0:05:57.770-0:05:58.036	IT1	0.160237	8	0.600285
Trial 8	6.3	Rep	F	0:05:58.036-0:05:58.302	IT1	0.125439	8	0.469926
Trial 8	6.3	Rep	F	0:05:58.302-0:05:58.568	IT1	0.112102	8	0.419959
Trial 8	6.3	Rep	F	0:05:58.568-0:05:58.834	IT1	0.0812756	8	0.30448
Trial 8	6.3	Rep	F	0:05:58.834-0:05:59.100	IT1	0.0564261	8	0.211386
Trial 8	6.3	Rep	F	0:05:59.100-0:05:59.366	IT1	0.0620535	8	0.232467
Trial 8	6.3	Rep	F	0:05:59.366-0:05:59.632	IT1	0.0655819	8	0.245686
Trial 8	6.3	Rep	F	0:05:59.632-0:05:59.898	IT1	0.286782	8	1.07435
Trial 8	6.3	Rep	F	0:05:59.898-0:06:00.164	IT1	0.115877	8	0.434102
Trial 8	6.3	Rep	F	0:06:00.164-0:06:00.430	IT1	0.150226	8	0.562783
Trial 8	6.3	Rep	F	0:06:00.430-0:06:00.696	IT1	0.25746	8	0.964508
Trial 8	6.3	Rep	F	0:06:00.696-0:06:00.962	IT1	0.145643	8	0.545615
Trial 8	6.3	Rep	F	0:06:00.962-0:06:01.228	IT1	0.110483	8	0.413897
Trial 8	6.3	Rep	F	0:06:01.228-0:06:01.494	IT1	0.0799587	7	0.342337
Trial 8	6.3	Rep	F	0:06:01.494-0:06:01.760	IT1	0.206077	8	0.772015
Trial 8	6.3	Rep	F	0:06:01.760-0:06:02.026	IT1	0.12044	8	0.451196
Trial 8	6.3	Rep	F	0:06:02.026-0:06:02.292	IT1	0.15398	8	0.576855
Trial 8	6.3	Rep	F	0:06:02.292-0:06:02.558	IT1	0.101496	8	0.380227
Trial 8	6.3	Rep	F	0:06:02.558-0:06:02.824	IT1	0.112278	8	0.420619
Trial 8	6.3	Rep	F	0:06:02.824-0:06:03.090	IT1	0.060489	8	0.226607
Trial 8	6.3	Rep	F	0:06:03.090-0:06:03.356	IT1	0.0655349	8	0.245511
Trial 8	6.3	Rep	F	0:06:03.356-0:06:03.622	IT1	0.0842927	8	0.315782
Trial 8	6.3	Rep	F	0:06:03.622-0:06:03.888	IT1	0.152412	8	0.570975
Trial 8	6.3	Rep	F	0:06:03.888-0:06:04.154	IT1	0.320806	8	1.20182
Trial 8	6.3	Rep	F	0:06:04.154-0:06:04.420	IT1	0.228897	8	0.857506
Trial 8	6.3	Rep	F	0:06:04.420-0:06:04.686	IT1	0.254013	8	0.951596
Trial 8	6.3	Rep	F	0:06:04.686-0:06:04.952	IT1	0.731431	8	2.74013
Trial 8	6.3	Rep	F	0:06:04.952-0:06:05.218	IT1	0.281912	8	1.05611
Trial 8	6.3	Rep	F	0:06:05.218-0:06:05.484	IT1	0.216827	8	0.812282
Trial 8	6.3	Rep	F	0:06:05.484-0:06:05.750	IT1	0.837717	8	3.13831
Trial 8	6.3	Rep	F	0:06:05.750-0:06:06.016	IT1	0.569801	8	2.13461
Trial 8	6.3	Rep	F	0:06:06.016-0:06:06.282	IT1	1.20546	8	4.51597
Trial 8	6.3	Rep	F	0:06:06.282-0:06:06.548	IT1	2.11891	8	7.93794
Trial 8	6.3	Rep	F	0:06:06.548-0:06:06.814	IT1	2.6671	8	9.99161
Trial 8	6.3	Rep	F	0:06:06.814-0:06:07.080	IT1	0.46484	8	1.74141
Trial 8	6.3	Rep	F	0:06:07.080-0:06:07.346	IT1	0.260178	8	0.974691
Trial 8	6.3	Rep	F	0:06:07.346-0:06:07.612	IT1	0.198003	8	0.74177
Trial 8	6.3	Rep	F	0:06:07.612-0:06:07.878	IT1	0.294737	8	1.10416
Trial 8	6.3	Rep	F	0:06:07.878-0:06:08.144	IT1	0.256636	8	0.961417
Trial 8	6.3	Rep	F	0:06:08.144-0:06:08.410	IT1	0.734306	8	2.7509
Trial 8	6.3	Rep	F	0:06:08.410-0:06:08.676	IT1	0.638022	8	2.39018
Trial 8	6.3	Rep	F	0:06:08.676-0:06:08.942	IT1	0.308141	8	1.15438
Trial 8	6.3	Rep	F	0:06:08.942-0:06:09.208	IT1	0.142752	8	0.534783
Trial 8	6.3	Rep	F	0:06:09.208-0:06:09.474	IT1	0.203661	8	0.762965
Trial 8	6.3	Rep	F	0:06:09.474-0:06:09.740	IT1	0.212785	8	0.79715
Trial 8	6.3	Rep	F	0:06:09.740-0:06:10.006	IT1	0.275638	8	1.03261
Trial 8	6.3	Rep	F	0:06:10.006-0:06:10.272	IT1	0.158268	8	0.592913
Trial 8	6.3	Rep	F	0:06:10.272-0:06:10.538	IT1	0.386309	8	1.44721
Trial 8	6.3	Rep	F	0:06:10.538-0:06:10.804	IT1	0.258509	7	1.10679
Trial 8	6.3	Rep	F	0:06:10.804-0:06:11.070	IT1	0.23491	8	0.880027
Trial 8	6.3	Rep	F	0:06:11.070-0:06:11.336	IT1	0.293219	8	1.09847
Trial 8	6.3	Rep	F	0:06:11.336-0:06:11.602	IT1	0.169355	8	0.634447
Trial 8	6.3	Rep	F	0:06:11.602-0:06:11.868	IT1	0.269014	8	1.0078
Trial 8	6.3	Rep	F	0:06:11.868-0:06:12.134	IT1	0.631419	8	2.36547
Trial 8	6.3	Rep	F	0:06:12.134-0:06:12.400	IT1	0.473507	8	1.77387
Trial 8	6.3	Rep	F	0:06:12.400-0:06:12.666	IT1	0.740412	8	2.77377
Trial 8	6.3	Rep	F	0:06:12.666-0:06:12.932	IT1	0.878844	8	3.29236
Trial 8	6.3	Rep	F	0:06:12.932-0:06:13.198	IT1	0.376974	8	1.41224
Trial 8	6.3	Rep	F	0:06:13.198-0:06:13.464	IT1	0.513818	8	1.92489
Trial 8	6.3	Rep	F	0:06:13.464-0:06:13.730	IT1	1.36258	8	5.10453
Trial 8	6.3	Rep	F	0:06:13.730-0:06:13.996	IT1	1.24832	8	4.67655
Trial 8	6.3	Rep	F	0:06:13.996-0:06:14.262	IT1	1.82132	8	6.8231
Trial 8	6.3	Rep	F	0:06:14.262-0:06:14.528	IT1	1.56955	8	5.87993
Trial 8	6.3	Rep	F	0:06:14.528-0:06:14.794	IT1	1.56955	8	5.87991
Trial 8	6.3	Rep	F	0:06:14.794-0:06:15.060	IT1	0.606879	8	2.27352
Trial 8	6.3	Rep	F	0:06:15.060-0:06:15.326	IT1	0.958529	8	3.5909
Trial 8	6.3	Rep	F	0:06:15.326-0:06:15.592	IT1	0.958529	8	3.59088
Trial 8	6.3	Rep	F	0:06:15.592-0:06:15.858	IT1	0.958529	8	3.5909
Trial 8	6.3	Rep	F	0:06:15.858-0:06:16.124	IT1	2.97014	8	11.1268
Trial 8	6.3	Rep	F	0:06:16.124-0:06:16.390	IT1	0.500272	8	1.87414
Trial 8	6.3	Rep	F	0:06:16.390-0:06:16.656	IT1	4.90169	8	18.363
Trial 8	6.3	Rep	F	0:06:16.656-0:06:16.922	IT1	0.604141	8	2.26326
Trial 8	6.3	Rep	F	0:06:16.922-0:06:17.188	IT1	0.353191	8	1.32314
Trial 8	6.3	Rep	F	0:06:17.188-0:06:17.454	IT1	0.353191	8	1.32314
Trial 8	6.3	Rep	F	0:06:17.454-0:06:17.720	IT1	0.353191	8	1.32314
Trial 8	6.3	Rep	F	0:06:17.720-0:06:17.986	IT1	0.353191	8	1.32314
Trial 8	6.3	Rep	F	0:06:17.986-0:06:18.252	IT1	0.353191	8	1.32314
Trial 8	6.3	Rep	F	0:06:18.252-0:06:18.518	IT1	0.353191	8	1.32314
Trial 8	6.3	Rep	F	0:06:18.518-0:06:18.784	IT1	0.353191	8	1.32314
Trial 8	6.3	Rep	F	0:06:18.784-0:06:19.050	IT1	0.353191	8	1.32314
Trial 8	6.3	Rep	F	0:06:19.050-0:06:19.316	IT1	0.353191	8	1.32314
Trial 8	6.3	Rep	F	0:06:19.316-0:06:19.582	IT1	0.353191	8	1.32314
Trial 8	6.3	Rep	F	0:06:19.582-0:06:19.848	IT1	0.353191	8	1.32314
Trial 8	6.3	Rep	F	0:06:19.848-0:06:20.114	IT1	0.353191	8	1.32314
Trial 8	6.3	Rep	F	0:06:20.114-0:06:20.380	IT1	1.85932	7	7.96051
Trial 8	6.3	Rep	F	0:06:20.380-0:06:20.646	IT1	0.717268	8	2.68707
Trial 8	6.3	Rep	F	0:06:20.646-0:06:20.912	IT1	1.24048	8	4.64715
Trial 8	6.3	Rep	F	0:06:20.912-0:06:21.178	IT1	1.44618	8	5.41777
Trial 8	6.3	Rep	F	0:06:21.178-0:06:21.444	IT1	1.24306	8	4.65684
Trial 8	6.3	Rep	F	0:06:21.444-0:06:21.710	IT1	0.694836	8	2.60302
Trial 8	6.3	Rep	F	0:06:21.710-0:06:21.976	IT1	1.10049	8	4.12273
Trial 8	6.3	Rep	F	0:06:21.976-0:06:22.242	IT1	0.791151	8	2.96384
Trial 8	6.3	Rep	F	0:06:22.242-0:06:22.508	IT1	1.29412	8	4.8481
Trial 8	6.3	Rep	F	0:06:22.508-0:06:22.774	IT1	0.922723	8	3.45675
Trial 8	6.3	Rep	F	0:06:22.774-0:06:23.040	IT1	0.998201	8	3.7395
Trial 8	6.3	Rep	F	0:06:23.040-0:06:23.306	IT1	0.674205	8	2.52574
Trial 8	6.3	Rep	F	0:06:23.306-0:06:23.572	IT1	0.260666	8	0.976516
Trial 8	6.3	Rep	F	0:06:23.572-0:06:23.838	IT1	0.648481	8	2.42936
Trial 8	6.3	Rep	F	0:06:23.838-0:06:24.104	IT1	0.425052	8	1.59237
Trial 8	6.3	Rep	F	0:06:24.104-0:06:24.370	IT1	0.539227	8	2.02006
Trial 8	6.3	Rep	F	0:06:24.370-0:06:24.636	IT1	0.657076	8	2.46157
Trial 8	6.3	Rep	F	0:06:24.636-0:06:24.902	IT1	0.723923	8	2.71201
Trial 8	6.3	Rep	F	0:06:24.902-0:06:25.168	IT1	0.84252	8	3.15629
Trial 8	6.3	Rep	F	0:06:25.168-0:06:25.434	IT1	0.448265	8	1.67932
Trial 8	6.3	Rep	F	0:06:25.434-0:06:25.700	IT1	0.213121	8	0.798397
Trial 8	6.3	Rep	F	0:06:25.700-0:06:25.966	IT1	0.542711	8	2.03313
Trial 8	6.3	Rep	F	0:06:25.966-0:06:26.232	IT1	0.143611	8	0.538002
Trial 8	6.3	Rep	F	0:06:26.232-0:06:26.498	IT1	0.164068	8	0.614642
Trial 8	6.3	Rep	F	0:06:26.498-0:06:26.764	IT1	0.0632558	8	0.236972
Trial 8	6.3	Rep	F	0:06:26.764-0:06:27.030	IT1	0.334226	8	1.25209
Trial 8	6.3	Rep	F	0:06:27.030-0:06:27.296	IT1	0.581024	8	2.17667
Trial 8	6.3	Rep	F	0:06:27.296-0:06:27.562	IT1	0.445458	8	1.66879
Trial 8	6.3	Rep	F	0:06:27.562-0:06:27.828	IT1	0.25365	8	0.950235
Trial 8	6.3	Rep	F	0:06:27.828-0:06:28.094	IT1	0.410955	8	1.53954
Trial 8	6.3	Rep	F	0:06:28.094-0:06:28.360	IT1	0.325392	8	1.219
Trial 8	6.3	Rep	F	0:06:28.360-0:06:28.626	IT1	0.186859	8	0.700022
Trial 8	6.3	Rep	F	0:06:28.626-0:06:28.892	IT1	0.226569	8	0.848785
Trial 8	6.3	Rep	F	0:06:28.892-0:06:29.158	IT1	0.232452	8	0.870824
Trial 8	6.3	Rep	F	0:06:29.158-0:06:29.424	IT1	0.265351	8	0.994072
Trial 8	6.3	Rep	F	0:06:29.424-0:06:29.690	IT1	0.221266	8	0.82892
Trial 8	6.3	Rep	F	0:06:29.690-0:06:29.956	IT1	0.121022	7	0.518148
Trial 8	6.3	Rep	F	0:06:29.956-0:06:30.222	IT1	0.0710826	8	0.266293
Trial 8	6.3	Rep	F	0:06:30.222-0:06:30.488	IT1	0.163452	8	0.612329
Trial 8	6.3	Rep	F	0:06:30.488-0:06:30.754	IT1	0.355873	8	1.33319
Trial 8	6.3	Rep	F	0:06:30.754-0:06:31.020	IT1	0.405188	8	1.51795
Trial 8	6.3	Rep	F	0:06:31.020-0:06:31.286	IT1	0.123508	8	0.462691
Trial 8	6.3	Rep	F	0:06:31.286-0:06:31.552	IT1	0.206087	8	0.772054
Trial 8	6.3	Rep	F	0:06:31.552-0:06:31.818	IT1	0.0957513	8	0.358706
Trial 8	6.3	Rep	F	0:06:31.818-0:06:32.084	IT1	0.235693	8	0.882965
Trial 8	6.3	Rep	F	0:06:32.084-0:06:32.350	IT1	0.196765	8	0.737136
Trial 8	6.3	Rep	F	0:06:32.350-0:06:32.616	IT1	0.206394	8	0.773203
Trial 8	6.3	Rep	F	0:06:32.616-0:06:32.882	IT1	0.40471	8	1.51614
Trial 8	6.3	Rep	F	0:06:32.882-0:06:33.148	IT1	0.0860648	8	0.32242
Trial 8	6.3	Rep	F	0:06:33.148-0:06:33.414	IT1	0.161849	8	0.606322
Trial 8	6.3	Rep	F	0:06:33.414-0:06:33.680	IT1	0.160225	8	0.600243
Trial 8	6.3	Rep	F	0:06:33.680-0:06:33.946	IT1	0.184908	8	0.692708
Trial 8	6.3	Rep	F	0:06:33.946-0:06:34.212	IT1	0.110135	8	0.412593
Trial 8	6.3	Rep	F	0:06:34.212-0:06:34.478	IT1	0.133825	8	0.50134
Trial 8	6.3	Rep	F	0:06:34.478-0:06:34.744	IT1	0.0702254	8	0.263082
Trial 8	6.3	Rep	F	0:06:34.744-0:06:35.010	IT1	0.0461586	8	0.172921
Trial 8	6.3	Rep	F	0:06:35.010-0:06:35.276	IT1	0.0721643	8	0.270344
Trial 8	6.3	Rep	F	0:06:35.276-0:06:35.542	IT1	0.128094	8	0.479877
Trial 8	6.3	Rep	F	0:06:35.542-0:06:35.808	IT1	0.25587	8	0.958551
Trial 8	6.3	Rep	F	0:06:35.808-0:06:36.074	IT1	0.101989	8	0.382075
Trial 8	6.3	Rep	F	0:06:36.074-0:06:36.340	IT1	0.156598	8	0.586658
Trial 8	6.3	Rep	F	0:06:36.340-0:06:36.606	IT1	0.20146	8	0.754719
Trial 8	6.3	Rep	F	0:06:36.606-0:06:36.872	IT1	0.0876477	8	0.328351
Trial 8	6.3	Rep	F	0:06:36.872-0:06:37.138	IT1	0.180717	8	0.67701
Trial 8	6.3	Rep	F	0:06:37.138-0:06:37.404	IT1	0.138278	8	0.518023
Trial 8	6.3	Rep	F	0:06:37.404-0:06:37.670	IT1	0.0817642	8	0.30631
Trial 8	6.3	Rep	F	0:06:37.670-0:06:37.936	IT1	0.0806326	8	0.302072
Trial 8	6.3	Rep	F	0:06:37.936-0:06:38.202	IT1	0.0928914	8	0.347997
Trial 8	6.3	Rep	F	0:06:38.202-0:06:38.468	IT1	0.147058	8	0.55092
Trial 8	6.3	Rep	F	0:06:38.468-0:06:38.734	IT1	0.0814048	8	0.304963
Trial 8	6.3	Rep	F	0:06:38.734-0:06:39.000	IT1	0.0826686	8	0.309698
Trial 8	6.3	Rep	F	0:06:39.000-0:06:39.266	IT1	0.110573	8	0.414233
Trial 8	6.3	Rep	F	0:06:39.266-0:06:39.532	IT1	0.0872789	7	0.373677
Trial 8	6.3	Rep	F	0:06:39.532-0:06:39.798	IT1	0.067891	8	0.254337
Trial 8	6.3	Rep	F	0:06:39.798-0:06:40.064	IT1	0.147201	8	0.551448
Trial 8	6.3	Rep	F	0:06:40.064-0:06:40.330	IT1	0.261477	8	0.979565
Trial 8	6.3	Rep	F	0:06:40.330-0:06:40.596	IT1	0.189772	8	0.710934
Trial 8	6.3	Rep	F	0:06:40.596-0:06:40.862	IT1	0.130375	8	0.488418
Trial 8	6.3	Rep	F	0:06:40.862-0:06:41.128	IT1	0.0882462	8	0.330594
Trial 8	6.3	Rep	F	0:06:41.128-0:06:41.394	IT1	0.147262	8	0.551683
Trial 8	6.3	Rep	F	0:06:41.394-0:06:41.660	IT1	0.120834	8	0.452674
Trial 8	6.3	Rep	F	0:06:41.660-0:06:41.926	IT1	0.0888336	8	0.332794
Trial 8	6.3	Rep	F	0:06:41.926-0:06:42.192	IT1	0.117312	8	0.439481
Trial 8	6.3	Rep	F	0:06:42.192-0:06:42.458	IT1	0.180431	8	0.675938
Trial 8	6.3	Rep	F	0:06:42.458-0:06:42.724	IT1	0.310467	8	1.16308
Trial 8	6.3	Rep	F	0:06:42.724-0:06:42.990	IT1	0.186712	8	0.699471
Trial 8	6.3	Rep	F	0:06:42.990-0:06:43.256	IT1	0.157913	8	0.591579
Trial 8	6.3	Rep	F	0:06:43.256-0:06:43.522	IT1	0.0847828	8	0.317616
Trial 8	6.3	Rep	F	0:06:43.522-0:06:43.788	IT1	0.153361	8	0.57453
Trial 8	6.3	Rep	F	0:06:43.788-0:06:44.054	IT1	0.103796	8	0.388845
Trial 8	6.3	Rep	F	0:06:44.054-0:06:44.320	IT1	0.187584	8	0.702739
Trial 8	6.3	Rep	F	0:06:44.320-0:06:44.586	IT1	0.126175	8	0.472681
Trial 8	6.3	Rep	F	0:06:44.586-0:06:44.852	IT1	0.144474	8	0.541232
Trial 8	6.3	Rep	F	0:06:44.852-0:06:45.118	IT1	0.141536	8	0.530232
Trial 8	6.3	Rep	F	0:06:45.118-0:06:45.384	IT1	0.16286	8	0.610114
Trial 8	6.3	Rep	F	0:06:45.384-0:06:45.650	IT1	0.143152	8	0.536286
Trial 8	6.3	Rep	F	0:06:45.650-0:06:45.916	IT1	0.221794	8	0.830896
Trial 8	6.3	Rep	F	0:06:45.916-0:06:46.182	IT1	0.172428	8	0.64596
Trial 8	6.3	Rep	F	0:06:46.182-0:06:46.448	IT1	0.221454	8	0.829627
Trial 8	6.3	Rep	F	0:06:46.448-0:06:46.714	IT1	0.247098	8	0.925686
Trial 8	6.3	Rep	F	0:06:46.714-0:06:46.980	IT1	0.358551	8	1.34322
Trial 8	6.3	Rep	F	0:06:46.980-0:06:47.246	IT1	0.251577	8	0.94247
Trial 8	6.3	Rep	F	0:06:47.246-0:06:47.512	IT1	0.188377	8	0.705708
Trial 8	6.3	Rep	F	0:06:47.512-0:06:47.778	IT1	0.276827	8	1.03707
Trial 8	6.3	Rep	F	0:06:47.778-0:06:48.044	IT1	0.121076	8	0.453579
Trial 8	6.3	Rep	F	0:06:48.044-0:06:48.310	IT1	0.147878	8	0.553987
Trial 8	6.3	Rep	F	0:06:48.310-0:06:48.576	IT1	0.115596	8	0.433049
Trial 8	6.3	Rep	F	0:06:48.576-0:06:48.842	IT1	0.129969	7	0.55645
Trial 8	6.3	Rep	F	0:06:48.842-0:06:49.108	IT1	0.137006	8	0.513257
Trial 8	6.3	Rep	F	0:06:49.108-0:06:49.374	IT1	0.0671852	8	0.251694
Trial 8	6.3	Rep	F	0:06:49.374-0:06:49.640	IT1	0.0730832	8	0.273789
Trial 8	6.3	Rep	F	0:06:49.640-0:06:49.906	IT1	0.217782	8	0.815867
Trial 8	6.3	Rep	F	0:06:49.906-0:06:50.172	IT1	0.0913782	8	0.342325
Trial 8	6.3	Rep	F	0:06:50.172-0:06:50.438	CS2a	0.0925205	8	0.346607
Trial 8	6.3	Rep	F	0:06:50.438-0:06:50.704	CS2a	0.162282	8	0.607953
Trial 8	6.3	Rep	F	0:06:50.704-0:06:50.970	CS2a	0.193329	8	0.72426
Trial 8	6.3	Rep	F	0:06:50.970-0:06:51.236	CS2a	0.242789	8	0.909549
Trial 8	6.3	Rep	F	0:06:51.236-0:06:51.502	CS2a	0.0725814	8	0.271908
Trial 8	6.3	Rep	F	0:06:51.502-0:06:51.768	CS2a	0.0450398	8	0.168731
Trial 8	6.3	Rep	F	0:06:51.768-0:06:52.034	CS2a	0.119003	8	0.445815
Trial 8	6.3	Rep	F	0:06:52.034-0:06:52.300	CS2a	0.0991753	8	0.371535
Trial 8	6.3	Rep	F	0:06:52.300-0:06:52.566	CS2a	0.110099	8	0.412463
Trial 8	6.3	Rep	F	0:06:52.566-0:06:52.832	CS2a	0.12202	8	0.457115
Trial 8	6.3	Rep	F	0:06:52.832-0:06:53.098	CS2a	0.143564	8	0.537829
Trial 8	6.3	Rep	F	0:06:53.098-0:06:53.364	CS2a	0.208633	8	0.781597
Trial 8	6.3	Rep	F	0:06:53.364-0:06:53.630	CS2a	0.13312	8	0.498699
Trial 8	6.3	Rep	F	0:06:53.630-0:06:53.896	CS2a	0.333735	8	1.25026
Trial 8	6.3	Rep	F	0:06:53.896-0:06:54.162	CS2a	0.197198	8	0.738748
Trial 8	6.3	Rep	F	0:06:54.162-0:06:54.428	CS2a	0.533753	8	1.99957
Trial 8	6.3	Rep	F	0:06:54.428-0:06:54.694	CS2a	0.155009	8	0.5807
Trial 8	6.3	Rep	F	0:06:54.694-0:06:54.960	CS2a	0.13836	8	0.51833
Trial 8	6.3	Rep	F	0:06:54.960-0:06:55.226	CS2a	0.178575	8	0.668989
Trial 8	6.3	Rep	F	0:06:55.226-0:06:55.492	CS2a	0.0908732	8	0.340433
Trial 8	6.3	Rep	F	0:06:55.492-0:06:55.758	CS2a	0.151941	8	0.569209
Trial 8	6.3	Rep	F	0:06:55.758-0:06:56.024	CS2a	0.183653	8	0.68801
Trial 8	6.3	Rep	F	0:06:56.024-0:06:56.290	CS2a	0.252754	8	0.946878
Trial 8	6.3	Rep	F	0:06:56.290-0:06:56.556	CS2a	0.13239	8	0.49597
Trial 8	6.3	Rep	F	0:06:56.556-0:06:56.822	CS2a	0.0921539	8	0.34523
Trial 8	6.3	Rep	F	0:06:56.822-0:06:57.088	CS2a	0.33835	8	1.26754
Trial 8	6.3	Rep	F	0:06:57.088-0:06:57.354	CS2a	0.327371	8	1.22642
Trial 8	6.3	Rep	F	0:06:57.354-0:06:57.620	CS2a	0.241662	8	0.905321
Trial 8	6.3	Rep	F	0:06:57.620-0:06:57.886	CS2a	0.111206	8	0.416608
Trial 8	6.3	Rep	F	0:06:57.886-0:06:58.152	CS2a	0.110197	8	0.412825
Trial 8	6.3	Rep	F	0:06:58.152-0:06:58.418	CS2a	0.338807	7	1.45058
Trial 8	6.3	Rep	F	0:06:58.418-0:06:58.684	CS2a	0.499991	8	1.8731
Trial 8	6.3	Rep	F	0:06:58.684-0:06:58.950	CS2a	2.13914	8	8.01373
Trial 8	6.3	Rep	F	0:06:58.950-0:06:59.216	CS2a	2.76818	8	10.3703
Trial 8	6.3	Rep	F	0:06:59.216-0:06:59.482	CS2a	2.03491	8	7.62332
Trial 8	6.3	Rep	F	0:06:59.482-0:06:59.748	CS2a	1.06984	8	4.0079
Trial 8	6.3	Rep	F	0:06:59.748-0:07:00.014	CS2a	0.229051	8	0.858085
Trial 8	6.3	Rep	F	0:07:00.014-0:07:00.280	CS2b	0.145953	8	0.546776
Trial 8	6.3	Rep	F	0:07:00.280-0:07:00.546	CS2b	4.69079	8	17.5728
Trial 8	6.3	Rep	F	0:07:00.546-0:07:00.812	CS2b	5.12377	8	19.1949
Trial 8	6.3	Rep	F	0:07:00.812-0:07:01.078	CS2b	3.49072	8	13.0771
Trial 8	6.3	Rep	F	0:07:01.078-0:07:01.344	CS2b	0.540855	8	2.02618
Trial 8	6.3	Rep	F	0:07:01.344-0:07:01.610	CS2b	0.285036	8	1.06781
Trial 8	6.3	Rep	F	0:07:01.610-0:07:01.876	CS2b	1.03233	8	3.86736
Trial 8	6.3	Rep	F	0:07:01.876-0:07:02.142	CS2b	1.14772	8	4.29965
Trial 8	6.3	Rep	F	0:07:02.142-0:07:02.408	CS2b	1.29867	8	4.86512
Trial 8	6.3	Rep	F	0:07:02.408-0:07:02.674	CS2b	0.248319	8	0.930263
Trial 8	6.3	Rep	F	0:07:02.674-0:07:02.940	CS2b	0.084539	8	0.316702
Trial 8	6.3	Rep	F	0:07:02.940-0:07:03.206	CS2b	0.0297217	8	0.111345
Trial 8	6.3	Rep	F	0:07:03.206-0:07:03.472	CS2b	0.128798	8	0.482509
Trial 8	6.3	Rep	F	0:07:03.472-0:07:03.738	CS2b	0.27583	8	1.03332
Trial 8	6.3	Rep	F	0:07:03.738-0:07:04.004	CS2b	0.644334	8	2.41384
Trial 8	6.3	Rep	F	0:07:04.004-0:07:04.270	CS2b	0.194227	8	0.727619
Trial 8	6.3	Rep	F	0:07:04.270-0:07:04.536	CS2b	0.0890444	8	0.333584
Trial 8	6.3	Rep	F	0:07:04.536-0:07:04.802	CS2b	0.0729616	8	0.273332
Trial 8	6.3	Rep	F	0:07:04.802-0:07:05.068	CS2b	0.047227	8	0.176923
Trial 8	6.3	Rep	F	0:07:05.068-0:07:05.334	CS2b	0.0848383	8	0.317828
Trial 8	6.3	Rep	F	0:07:05.334-0:07:05.600	CS2b	0.0356597	8	0.133589
Trial 8	6.3	Rep	F	0:07:05.600-0:07:05.866	CS2b	0.16818	8	0.630042
Trial 8	6.3	Rep	F	0:07:05.866-0:07:06.132	CS2b	0.742644	8	2.78214
Trial 8	6.3	Rep	F	0:07:06.132-0:07:06.398	CS2b	1.00201	8	3.75378
Trial 8	6.3	Rep	F	0:07:06.398-0:07:06.664	CS2b	0.350229	8	1.31205
Trial 8	6.3	Rep	F	0:07:06.664-0:07:06.930	CS2b	0.282116	8	1.05688
Trial 8	6.3	Rep	F	0:07:06.930-0:07:07.196	CS2b	1.56252	8	5.8536
Trial 8	6.3	Rep	F	0:07:07.196-0:07:07.462	CS2b	2.52202	8	9.44815
Trial 8	6.3	Rep	F	0:07:07.462-0:07:07.728	CS2b	1.55856	8	5.83874
Trial 8	6.3	Rep	F	0:07:07.728-0:07:07.994	CS2b	2.77247	7	11.8701
Trial 8	6.3	Rep	F	0:07:07.994-0:07:08.260	CS2b	4.81105	8	18.0234
Trial 8	6.3	Rep	F	0:07:08.260-0:07:08.526	CS2b	4.35607	8	16.3189
Trial 8	6.3	Rep	F	0:07:08.526-0:07:08.792	CS2b	2.80004	8	10.4897
Trial 8	6.3	Rep	F	0:07:08.792-0:07:09.058	CS2b	1.85541	8	6.95086
Trial 8	6.3	Rep	F	0:07:09.058-0:07:09.324	CS2b	0.963142	8	3.60817
Trial 8	6.3	Rep	F	0:07:09.324-0:07:09.590	CS2b	0.527126	8	1.97475
Trial 8	6.3	Rep	F	0:07:09.590-0:07:09.856	CS2b	0.165136	8	0.618638
Trial 8	6.3	Rep	F	0:07:09.856-0:07:10.122	CS2b	0.102958	8	0.385706
Trial 8	6.3	Rep	F	0:07:10.122-0:07:10.388	IT2	0.153313	8	0.57435
Trial 8	6.3	Rep	F	0:07:10.388-0:07:10.654	IT2	4.87494	8	18.2627
Trial 8	6.3	Rep	F	0:07:10.654-0:07:10.920	IT2	13.1566	8	49.2879
Trial 8	6.3	Rep	F	0:07:10.920-0:07:11.186	IT2	4.36788	8	16.3631
Trial 8	6.3	Rep	F	0:07:11.186-0:07:11.452	IT2	2.72803	8	10.2198
Trial 8	6.3	Rep	F	0:07:11.452-0:07:11.718	IT2	2.83583	8	10.6238
Trial 8	6.3	Rep	F	0:07:11.718-0:07:11.984	IT2	1.09118	8	4.08782
Trial 8	6.3	Rep	F	0:07:11.984-0:07:12.250	IT2	1.63561	8	6.12741
Trial 8	6.3	Rep	F	0:07:12.250-0:07:12.516	IT2	0.397471	8	1.48902
Trial 8	6.3	Rep	F	0:07:12.516-0:07:12.782	IT2	0.486029	8	1.82078
Trial 8	6.3	Rep	F	0:07:12.782-0:07:13.048	IT2	1.07471	8	4.02614
Trial 8	6.3	Rep	F	0:07:13.048-0:07:13.314	IT2	1.43409	8	5.37248
Trial 8	6.3	Rep	F	0:07:13.314-0:07:13.580	IT2	1.14642	8	4.2948
Trial 8	6.3	Rep	F	0:07:13.580-0:07:13.846	IT2	0.482598	8	1.80793
Trial 8	6.3	Rep	F	0:07:13.846-0:07:14.112	IT2	0.384282	8	1.43962
Trial 8	6.3	Rep	F	0:07:14.112-0:07:14.378	IT2	0.781746	8	2.92862
Trial 8	6.3	Rep	F	0:07:14.378-0:07:14.644	IT2	0.239699	8	0.897968
Trial 8	6.3	Rep	F	0:07:14.644-0:07:14.910	IT2	0.493491	8	1.84875
Trial 8	6.3	Rep	F	0:07:14.910-0:07:15.176	IT2	0.267934	8	1.00374
Trial 8	6.3	Rep	F	0:07:15.176-0:07:15.442	IT2	0.200666	8	0.751743
Trial 8	6.3	Rep	F	0:07:15.442-0:07:15.708	IT2	0.346674	8	1.29873
Trial 8	6.3	Rep	F	0:07:15.708-0:07:15.974	IT2	0.462464	8	1.7325
Trial 8	6.3	Rep	F	0:07:15.974-0:07:16.240	IT2	0.502409	8	1.88216
Trial 8	6.3	Rep	F	0:07:16.240-0:07:16.506	IT2	0.242241	8	0.907491
Trial 8	6.3	Rep	F	0:07:16.506-0:07:16.772	IT2	0.192331	8	0.720517
Trial 8	6.3	Rep	F	0:07:16.772-0:07:17.038	IT2	0.583717	8	2.18676
Trial 8	6.3	Rep	F	0:07:17.038-0:07:17.304	IT2	0.66739	8	2.50021
Trial 8	6.3	Rep	F	0:07:17.304-0:07:17.570	IT2	0.784428	7	3.35849
Trial 8	6.3	Rep	F	0:07:17.570-0:07:17.836	IT2	0.258413	8	0.968082
Trial 8	6.3	Rep	F	0:07:17.836-0:07:18.102	IT2	0.229921	8	0.861343
Trial 8	6.3	Rep	F	0:07:18.102-0:07:18.368	IT2	0.241236	8	0.903731
Trial 8	6.3	Rep	F	0:07:18.368-0:07:18.634	IT2	0.25638	8	0.960459
Trial 8	6.3	Rep	F	0:07:18.634-0:07:18.900	IT2	0.164702	8	0.617011
Trial 8	6.3	Rep	F	0:07:18.900-0:07:19.166	IT2	0.14687	8	0.550211
Trial 8	6.3	Rep	F	0:07:19.166-0:07:19.432	IT2	0.150096	8	0.562295
Trial 8	6.3	Rep	F	0:07:19.432-0:07:19.698	IT2	0.154178	8	0.57759
Trial 8	6.3	Rep	F	0:07:19.698-0:07:19.964	IT2	0.118249	8	0.442987
Trial 8	6.3	Rep	F	0:07:19.964-0:07:20.230	IT2	0.102878	8	0.385405
Trial 8	6.3	Rep	F	0:07:20.230-0:07:20.496	IT2	0.135271	8	0.506761
Trial 8	6.3	Rep	F	0:07:20.496-0:07:20.762	IT2	0.0504791	8	0.189106
Trial 8	6.3	Rep	F	0:07:20.762-0:07:21.028	IT2	0.114231	8	0.42794
Trial 8	6.3	Rep	F	0:07:21.028-0:07:21.294	IT2	0.208272	8	0.780241
Trial 8	6.3	Rep	F	0:07:21.294-0:07:21.560	IT2	0.377185	8	1.41303
Trial 8	6.3	Rep	F	0:07:21.560-0:07:21.826	IT2	0.160239	8	0.600294
Trial 8	6.3	Rep	F	0:07:21.826-0:07:22.092	IT2	0.146259	8	0.547921
Trial 8	6.3	Rep	F	0:07:22.092-0:07:22.358	IT2	0.126411	8	0.473566
Trial 8	6.3	Rep	F	0:07:22.358-0:07:22.624	IT2	0.0941404	8	0.352673
Trial 8	6.3	Rep	F	0:07:22.624-0:07:22.890	IT2	0.0689631	8	0.258352
Trial 8	6.3	Rep	F	0:07:22.890-0:07:23.156	IT2	0.0413061	8	0.154742
Trial 8	6.3	Rep	F	0:07:23.156-0:07:23.422	IT2	0.156356	8	0.585751
Trial 8	6.3	Rep	F	0:07:23.422-0:07:23.688	IT2	0.0725649	8	0.271846
Trial 8	6.3	Rep	F	0:07:23.688-0:07:23.954	IT2	0.146803	8	0.549958
Trial 8	6.3	Rep	F	0:07:23.954-0:07:24.220	IT2	0.0532379	8	0.199442
Trial 8	6.3	Rep	F	0:07:24.220-0:07:24.486	IT2	0.0840165	8	0.314749
Trial 8	6.3	Rep	F	0:07:24.486-0:07:24.752	IT2	0.125718	8	0.47097
Trial 8	6.3	Rep	F	0:07:24.752-0:07:25.018	IT2	0.326527	8	1.22326
Trial 8	6.3	Rep	F	0:07:25.018-0:07:25.284	IT2	0.146715	8	0.549632
Trial 8	6.3	Rep	F	0:07:25.284-0:07:25.550	IT2	0.134698	8	0.504608
Trial 8	6.3	Rep	F	0:07:25.550-0:07:25.816	IT2	0.195817	8	0.733578
Trial 8	6.3	Rep	F	0:07:25.816-0:07:26.082	IT2	0.209315	8	0.784145
Trial 8	6.3	Rep	F	0:07:26.082-0:07:26.348	IT2	0.85141	8	3.18961
Trial 8	6.3	Rep	F	0:07:26.348-0:07:26.614	IT2	2.23953	8	8.38985
Trial 8	6.3	Rep	F	0:07:26.614-0:07:26.880	IT2	2.06736	7	8.85125
Trial 8	6.3	Rep	F	0:07:26.880-0:07:27.146	IT2	1.1917	8	4.46442
Trial 8	6.3	Rep	F	0:07:27.146-0:07:27.412	IT2	0.879746	8	3.29575
Trial 8	6.3	Rep	F	0:07:27.412-0:07:27.678	IT2	0.280688	8	1.05152
Trial 8	6.3	Rep	F	0:07:27.678-0:07:27.944	IT2	0.469522	8	1.75895
Trial 8	6.3	Rep	F	0:07:27.944-0:07:28.210	IT2	1.13753	8	4.26146
Trial 8	6.3	Rep	F	0:07:28.210-0:07:28.476	IT2	1.26677	8	4.74564
Trial 8	6.3	Rep	F	0:07:28.476-0:07:28.742	IT2	1.07953	8	4.0442
Trial 8	6.3	Rep	F	0:07:28.742-0:07:29.008	IT2	0.791095	8	2.96364
Trial 8	6.3	Rep	F	0:07:29.008-0:07:29.274	IT2	1.46819	8	5.50023
Trial 8	6.3	Rep	F	0:07:29.274-0:07:29.540	IT2	1.94171	8	7.27414
Trial 8	6.3	Rep	F	0:07:29.540-0:07:29.806	IT2	1.9847	8	7.43518
Trial 8	6.3	Rep	F	0:07:29.806-0:07:30.072	IT2	1.56491	8	5.86255
Trial 8	6.3	Rep	F	0:07:30.072-0:07:30.338	IT2	0.596456	8	2.23446
Trial 8	6.3	Rep	F	0:07:30.338-0:07:30.604	IT2	0.449853	8	1.68526
Trial 8	6.3	Rep	F	0:07:30.604-0:07:30.870	IT2	0.217938	8	0.816446
Trial 8	6.3	Rep	F	0:07:30.870-0:07:31.136	IT2	0.456242	8	1.7092
Trial 8	6.3	Rep	F	0:07:31.136-0:07:31.402	IT2	0.182101	8	0.682199
Trial 8	6.3	Rep	F	0:07:31.402-0:07:31.668	IT2	0.517158	8	1.9374
Trial 8	6.3	Rep	F	0:07:31.668-0:07:31.934	IT2	0.264251	8	0.989952
Trial 8	6.3	Rep	F	0:07:31.934-0:07:32.200	IT2	0.386842	8	1.44921
Trial 8	6.3	Rep	F	0:07:32.200-0:07:32.466	IT2	0.702308	8	2.63101
Trial 8	6.3	Rep	F	0:07:32.466-0:07:32.732	IT2	0.513293	8	1.92293
Trial 8	6.3	Rep	F	0:07:32.732-0:07:32.998	IT2	0.196736	8	0.737021
Trial 8	6.3	Rep	F	0:07:32.998-0:07:33.264	IT2	0.136867	8	0.512744
Trial 8	6.3	Rep	F	0:07:33.264-0:07:33.530	IT2	0.330938	8	1.23977
Trial 8	6.3	Rep	F	0:07:33.530-0:07:33.796	IT2	0.247033	8	0.925452
Trial 8	6.3	Rep	F	0:07:33.796-0:07:34.062	IT2	0.369889	8	1.38569
Trial 8	6.3	Rep	F	0:07:34.062-0:07:34.328	IT2	0.271976	8	1.01888
Trial 8	6.3	Rep	F	0:07:34.328-0:07:34.594	IT2	0.149669	8	0.5607
Trial 8	6.3	Rep	F	0:07:34.594-0:07:34.860	IT2	0.362664	8	1.35863
Trial 8	6.3	Rep	F	0:07:34.860-0:07:35.126	IT2	0.183742	8	0.68835
Trial 8	6.3	Rep	F	0:07:35.126-0:07:35.392	IT2	0.596726	8	2.23549
Trial 8	6.3	Rep	F	0:07:35.392-0:07:35.658	IT2	0.923987	8	3.46148
Trial 8	6.3	Rep	F	0:07:35.658-0:07:35.924	IT2	0.381752	8	1.43014
Trial 8	6.3	Rep	F	0:07:35.924-0:07:36.190	IT2	0.233174	8	0.873527
Trial 8	6.3	Rep	F	0:07:36.190-0:07:36.456	IT2	0.165218	7	0.707366
Trial 8	6.3	Rep	F	0:07:36.456-0:07:36.722	IT2	0.321292	8	1.20364
Trial 8	6.3	Rep	F	0:07:36.722-0:07:36.988	IT2	0.642385	8	2.40653
Trial 8	6.3	Rep	F	0:07:36.988-0:07:37.254	IT2	0.374267	8	1.40209
Trial 8	6.3	Rep	F	0:07:37.254-0:07:37.520	IT2	1.13848	8	4.26505
Trial 8	6.3	Rep	F	0:07:37.520-0:07:37.786	IT2	0.651238	8	2.4397
Trial 8	6.3	Rep	F	0:07:37.786-0:07:38.052	IT2	0.24948	8	0.934613
Trial 8	6.3	Rep	F	0:07:38.052-0:07:38.318	IT2	0.225973	8	0.846556
Trial 8	6.3	Rep	F	0:07:38.318-0:07:38.584	IT2	0.379171	8	1.42046
Trial 8	6.3	Rep	F	0:07:38.584-0:07:38.850	IT2	0.62812	8	2.3531
Trial 8	6.3	Rep	F	0:07:38.850-0:07:39.116	IT2	0.702519	8	2.63181
Trial 8	6.3	Rep	F	0:07:39.116-0:07:39.382	IT2	0.315737	8	1.18284
Trial 8	6.3	Rep	F	0:07:39.382-0:07:39.648	IT2	0.434616	8	1.62817
Trial 8	6.3	Rep	F	0:07:39.648-0:07:39.914	IT2	0.359591	8	1.34711
Trial 8	6.3	Rep	F	0:07:39.914-0:07:40.180	IT2	0.644787	8	2.41554
Trial 8	6.3	Rep	F	0:07:40.180-0:07:40.446	IT2	0.196434	8	0.735887
Trial 8	6.3	Rep	F	0:07:40.446-0:07:40.712	IT2	0.182764	8	0.68468
Trial 8	6.3	Rep	F	0:07:40.712-0:07:40.978	IT2	0.0946479	8	0.354573
Trial 8	6.3	Rep	F	0:07:40.978-0:07:41.244	IT2	0.152519	8	0.571372
Trial 8	6.3	Rep	F	0:07:41.244-0:07:41.510	IT2	0.123006	8	0.460811
Trial 8	6.3	Rep	F	0:07:41.510-0:07:41.776	IT2	0.0801108	8	0.300114
Trial 8	6.3	Rep	F	0:07:41.776-0:07:42.042	IT2	0.117985	8	0.441998
Trial 8	6.3	Rep	F	0:07:42.042-0:07:42.308	IT2	0.0334694	8	0.125384
Trial 8	6.3	Rep	F	0:07:42.308-0:07:42.574	IT2	0.162904	8	0.610278
Trial 8	6.3	Rep	F	0:07:42.574-0:07:42.840	IT2	0.104429	8	0.391216
Trial 8	6.3	Rep	F	0:07:42.840-0:07:43.106	IT2	0.129663	8	0.485749
Trial 8	6.3	Rep	F	0:07:43.106-0:07:43.372	IT2	0.118677	8	0.444592
Trial 8	6.3	Rep	F	0:07:43.372-0:07:43.638	IT2	0.0795441	8	0.297991
Trial 8	6.3	Rep	F	0:07:43.638-0:07:43.904	IT2	0.15058	8	0.564108
Trial 8	6.3	Rep	F	0:07:43.904-0:07:44.170	IT2	0.121337	8	0.454558
Trial 8	6.3	Rep	F	0:07:44.170-0:07:44.436	IT2	0.218723	8	0.81939
Trial 8	6.3	Rep	F	0:07:44.436-0:07:44.702	IT2	0.234708	8	0.879276
Trial 8	6.3	Rep	F	0:07:44.702-0:07:44.968	IT2	0.216277	8	0.810228
Trial 8	6.3	Rep	F	0:07:44.968-0:07:45.234	IT2	0.146672	8	0.549468
Trial 8	6.3	Rep	F	0:07:45.234-0:07:45.500	IT2	0.141072	8	0.52849
Trial 8	6.3	Rep	F	0:07:45.500-0:07:45.766	IT2	0.105419	8	0.394925
Trial 8	6.3	Rep	F	0:07:45.766-0:07:46.032	IT2	0.0806063	7	0.345109
Trial 8	6.3	Rep	F	0:07:46.032-0:07:46.298	IT2	0.330144	8	1.2368
Trial 8	6.3	Rep	F	0:07:46.298-0:07:46.564	IT2	1.03182	8	3.86543
Trial 8	6.3	Rep	F	0:07:46.564-0:07:46.830	IT2	0.769486	8	2.88268
Trial 8	6.3	Rep	F	0:07:46.830-0:07:47.096	IT2	0.387078	8	1.45009
Trial 8	6.3	Rep	F	0:07:47.096-0:07:47.362	IT2	0.640077	8	2.39788
Trial 8	6.3	Rep	F	0:07:47.362-0:07:47.628	IT2	0.208964	8	0.782831
Trial 8	6.3	Rep	F	0:07:47.628-0:07:47.894	IT2	0.204221	8	0.765063
Trial 8	6.3	Rep	F	0:07:47.894-0:07:48.160	IT2	1.09906	8	4.11735
Trial 8	6.3	Rep	F	0:07:48.160-0:07:48.426	IT2	0.478835	8	1.79384
Trial 8	6.3	Rep	F	0:07:48.426-0:07:48.692	IT2	0.845342	8	3.16686
Trial 8	6.3	Rep	F	0:07:48.692-0:07:48.958	IT2	1.04648	8	3.92039
Trial 8	6.3	Rep	F	0:07:48.958-0:07:49.224	IT2	1.51129	8	5.66167
Trial 8	6.3	Rep	F	0:07:49.224-0:07:49.490	IT2	2.01964	8	7.56607
Trial 8	6.3	Rep	F	0:07:49.490-0:07:49.756	IT2	2.25265	8	8.43902
Trial 8	6.3	Rep	F	0:07:49.756-0:07:50.022	IT2	1.72049	8	6.44539
Trial 8	6.3	Rep	F	0:07:50.022-0:07:50.288	IT2	2.03725	8	7.63206
Trial 8	6.3	Rep	F	0:07:50.288-0:07:50.554	IT2	1.1228	8	4.20627
Trial 8	6.3	Rep	F	0:07:50.554-0:07:50.820	IT2	0.139976	8	0.524382
Trial 8	6.3	Rep	F	0:07:50.820-0:07:51.086	IT2	0.273332	8	1.02397
Trial 8	6.3	Rep	F	0:07:51.086-0:07:51.352	IT2	0.565721	8	2.11933
Trial 8	6.3	Rep	F	0:07:51.352-0:07:51.618	IT2	0.148176	8	0.555106
Trial 8	6.3	Rep	F	0:07:51.618-0:07:51.884	IT2	0.109535	8	0.410346
Trial 8	6.3	Rep	F	0:07:51.884-0:07:52.150	IT2	0.138855	8	0.520185
Trial 8	6.3	Rep	F	0:07:52.150-0:07:52.416	IT2	0.0561042	8	0.210181
Trial 8	6.3	Rep	F	0:07:52.416-0:07:52.682	IT2	0.155725	8	0.583386
Trial 8	6.3	Rep	F	0:07:52.682-0:07:52.948	IT2	0.127887	8	0.479096
Trial 8	6.3	Rep	F	0:07:52.948-0:07:53.214	IT2	0.0584657	8	0.219027
Trial 8	6.3	Rep	F	0:07:53.214-0:07:53.480	IT2	0.11956	8	0.447902
Trial 8	6.3	Rep	F	0:07:53.480-0:07:53.746	IT2	0.0605102	8	0.226687
Trial 8	6.3	Rep	F	0:07:53.746-0:07:54.012	IT2	0.0687312	8	0.257482
Trial 8	6.3	Rep	F	0:07:54.012-0:07:54.278	IT2	0.324777	8	1.2167
Trial 8	6.3	Rep	F	0:07:54.278-0:07:54.544	IT2	0.432356	8	1.61971
Trial 8	6.3	Rep	F	0:07:54.544-0:07:54.810	IT2	0.508502	8	1.90497
Trial 8	6.3	Rep	F	0:07:54.810-0:07:55.076	IT2	0.698649	8	2.61732
Trial 8	6.3	Rep	F	0:07:55.076-0:07:55.342	IT2	0.760834	7	3.25745
Trial 8	6.3	Rep	F	0:07:55.342-0:07:55.608	IT2	0.775401	8	2.90484
Trial 8	6.3	Rep	F	0:07:55.608-0:07:55.874	IT2	2.12943	8	7.97734
Trial 8	6.3	Rep	F	0:07:55.874-0:07:56.140	IT2	1.42764	8	5.34829
Trial 8	6.3	Rep	F	0:07:56.140-0:07:56.406	IT2	2.80721	8	10.5165
Trial 8	6.3	Rep	F	0:07:56.406-0:07:56.672	IT2	2.55182	8	9.55975
Trial 8	6.3	Rep	F	0:07:56.672-0:07:56.938	IT2	2.55008	8	9.55323
Trial 8	6.3	Rep	F	0:07:56.938-0:07:57.204	IT2	1.16199	8	4.35311
Trial 8	6.3	Rep	F	0:07:57.204-0:07:57.470	IT2	0.926754	8	3.47184
Trial 8	6.3	Rep	F	0:07:57.470-0:07:57.736	IT2	1.1226	8	4.20555
Trial 8	6.3	Rep	F	0:07:57.736-0:07:58.002	IT2	0.346112	8	1.29662
Trial 8	6.3	Rep	F	0:07:58.002-0:07:58.268	IT2	0.385868	8	1.44555
Trial 8	6.3	Rep	F	0:07:58.268-0:07:58.534	IT2	0.663023	8	2.48385
Trial 8	6.3	Rep	F	0:07:58.534-0:07:58.800	IT2	0.328116	8	1.2292
Trial 8	6.3	Rep	F	0:07:58.800-0:07:59.066	IT2	0.18473	8	0.692043
Trial 8	6.3	Rep	F	0:07:59.066-0:07:59.332	IT2	0.126226	8	0.472877
Trial 8	6.3	Rep	F	0:07:59.332-0:07:59.598	IT2	0.0738939	8	0.276824
Trial 8	6.3	Rep	F	0:07:59.598-0:07:59.864	IT2	0.027414	8	0.1027
Trial 8	6.3	Rep	F	0:07:59.864-0:08:00.130	IT2	0.183781	8	0.688486
Trial 8	6.3	Rep	F	0:08:00.130-0:08:00.396	IT2	0.116003	8	0.43458
Trial 8	6.3	Rep	F	0:08:00.396-0:08:00.662	IT2	1.18108	8	4.42462
Trial 8	6.3	Rep	F	0:08:00.662-0:08:00.928	IT2	1.12492	8	4.21424
Trial 8	6.3	Rep	F	0:08:00.928-0:08:01.194	IT2	1.17371	8	4.39704
Trial 8	6.3	Rep	F	0:08:01.194-0:08:01.460	IT2	1.97692	8	7.40603
Trial 8	6.3	Rep	F	0:08:01.460-0:08:01.726	IT2	5.07185	8	19.0005
Trial 8	6.3	Rep	F	0:08:01.726-0:08:01.992	IT2	3.89543	8	14.5932
Trial 8	6.3	Rep	F	0:08:01.992-0:08:02.258	IT2	0.632535	8	2.36964
Trial 8	6.3	Rep	F	0:08:02.258-0:08:02.524	IT2	0.187875	8	0.703828
Trial 8	6.3	Rep	F	0:08:02.524-0:08:02.790	IT2	0.158879	8	0.595199
Trial 8	6.3	Rep	F	0:08:02.790-0:08:03.056	IT2	0.178869	8	0.670088
Trial 8	6.3	Rep	F	0:08:03.056-0:08:03.322	IT2	0.125806	8	0.471301
Trial 8	6.3	Rep	F	0:08:03.322-0:08:03.588	IT2	0.154416	8	0.57848
Trial 8	6.3	Rep	F	0:08:03.588-0:08:03.854	IT2	0.0540787	8	0.202592
Trial 8	6.3	Rep	F	0:08:03.854-0:08:04.120	IT2	0.097566	8	0.365505
Trial 8	6.3	Rep	F	0:08:04.120-0:08:04.386	IT2	0.111244	8	0.416749
Trial 8	6.3	Rep	F	0:08:04.386-0:08:04.652	IT2	0.0453282	8	0.16981
Trial 8	6.3	Rep	F	0:08:04.652-0:08:04.918	IT2	0.134134	7	0.574284
Trial 8	6.3	Rep	F	0:08:04.918-0:08:05.184	IT2	0.0571995	8	0.214283
Trial 8	6.3	Rep	F	0:08:05.184-0:08:05.450	IT2	0.107815	8	0.403906
Trial 8	6.3	Rep	F	0:08:05.450-0:08:05.716	IT2	0.0988624	8	0.370365
Trial 8	6.3	Rep	F	0:08:05.716-0:08:05.982	IT2	0.118132	8	0.442553
Trial 8	6.3	Rep	F	0:08:05.982-0:08:06.248	IT2	0.1062	8	0.397852
Trial 8	6.3	Rep	F	0:08:06.248-0:08:06.514	IT2	0.103401	8	0.387364
Trial 8	6.3	Rep	F	0:08:06.514-0:08:06.780	IT2	0.204132	8	0.764731
Trial 8	6.3	Rep	F	0:08:06.780-0:08:07.046	IT2	0.0594139	8	0.222579
Trial 8	6.3	Rep	F	0:08:07.046-0:08:07.312	IT2	0.130256	8	0.487972
Trial 8	6.3	Rep	F	0:08:07.312-0:08:07.578	IT2	0.0755436	8	0.283004
Trial 8	6.3	Rep	F	0:08:07.578-0:08:07.844	IT2	0.107615	8	0.403153
Trial 8	6.3	Rep	F	0:08:07.844-0:08:08.110	IT2	0.0818802	8	0.306744
Trial 8	6.3	Rep	F	0:08:08.110-0:08:08.376	IT2	0.091555	8	0.342988
Trial 8	6.3	Rep	F	0:08:08.376-0:08:08.642	IT2	0.0748729	8	0.280493
Trial 8	6.3	Rep	F	0:08:08.642-0:08:08.908	IT2	0.105816	8	0.396414
Trial 8	6.3	Rep	F	0:08:08.908-0:08:09.174	IT2	0.0888634	8	0.332904
Trial 8	6.3	Rep	F	0:08:09.174-0:08:09.440	IT2	0.100151	8	0.375193
Trial 8	6.3	Rep	F	0:08:09.440-0:08:09.706	IT2	0.198441	8	0.743409
Trial 8	6.3	Rep	F	0:08:09.706-0:08:09.972	IT2	0.125647	8	0.470708
Trial 8	6.3	Rep	F	0:08:09.972-0:08:10.238	IT2	0.12867	8	0.482029
Trial 8	6.3	Rep	F	0:08:10.238-0:08:10.504	IT2	0.11872	8	0.444756
Trial 8	6.3	Rep	F	0:08:10.504-0:08:10.770	IT2	0.172588	8	0.646557
Trial 8	6.3	Rep	F	0:08:10.770-0:08:11.036	IT2	0.152884	8	0.57274
Trial 8	6.3	Rep	F	0:08:11.036-0:08:11.302	IT2	0.38257	8	1.43321
Trial 8	6.3	Rep	F	0:08:11.302-0:08:11.568	IT2	0.136385	8	0.510929
Trial 8	6.3	Rep	F	0:08:11.568-0:08:11.834	IT2	0.115202	8	0.431574
Trial 8	6.3	Rep	F	0:08:11.834-0:08:12.100	IT2	0.0923681	8	0.346034
Trial 8	6.3	Rep	F	0:08:12.100-0:08:12.366	IT2	0.0804705	8	0.301461
Trial 8	6.3	Rep	F	0:08:12.366-0:08:12.632	IT2	0.404257	8	1.51445
Trial 8	6.3	Rep	F	0:08:12.632-0:08:12.898	IT2	2.06477	8	7.73511
Trial 8	6.3	Rep	F	0:08:12.898-0:08:13.164	IT2	2.96063	8	11.0913
Trial 8	6.3	Rep	F	0:08:13.164-0:08:13.430	IT2	1.78121	8	6.67289
Trial 8	6.3	Rep	F	0:08:13.430-0:08:13.696	IT2	0.701873	8	2.62939
Trial 8	6.3	Rep	F	0:08:13.696-0:08:13.962	IT2	0.925361	8	3.46663
Trial 8	6.3	Rep	F	0:08:13.962-0:08:14.228	IT2	0.386748	8	1.44886
Trial 8	6.3	Rep	F	0:08:14.228-0:08:14.494	IT2	0.204041	7	0.873583
Trial 8	6.3	Rep	F	0:08:14.494-0:08:14.760	IT2	0.05034	8	0.188587
Trial 8	6.3	Rep	F	0:08:14.760-0:08:15.026	IT2	0.186415	8	0.698358
Trial 8	6.3	Rep	F	0:08:15.026-0:08:15.292	IT2	0.159893	8	0.599
Trial 8	6.3	Rep	F	0:08:15.292-0:08:15.558	IT2	0.112528	8	0.421557
Trial 8	6.3	Rep	F	0:08:15.558-0:08:15.824	IT2	0.190896	8	0.715142
Trial 8	6.3	Rep	F	0:08:15.824-0:08:16.090	IT2	0.177664	8	0.665575
Trial 8	6.3	Rep	F	0:08:16.090-0:08:16.356	IT2	0.207315	8	0.776657
Trial 8	6.3	Rep	F	0:08:16.356-0:08:16.622	IT2	0.0949761	8	0.355804
Trial 8	6.3	Rep	F	0:08:16.622-0:08:16.888	IT2	0.24264	8	0.908987
Trial 8	6.3	Rep	F	0:08:16.888-0:08:17.154	IT2	0.0631318	8	0.236507
Trial 8	6.3	Rep	F	0:08:17.154-0:08:17.420	IT2	0.119314	8	0.44698
Trial 8	6.3	Rep	F	0:08:17.420-0:08:17.686	IT2	0.0961352	8	0.360146
Trial 8	6.3	Rep	F	0:08:17.686-0:08:17.952	IT2	0.119769	8	0.448682
Trial 8	6.3	Rep	F	0:08:17.952-0:08:18.218	IT2	0.11581	8	0.433854
Trial 8	6.3	Rep	F	0:08:18.218-0:08:18.484	IT2	0.0661159	8	0.247686
Trial 8	6.3	Rep	F	0:08:18.484-0:08:18.750	IT2	0.096162	8	0.360248
Trial 8	6.3	Rep	F	0:08:18.750-0:08:19.016	IT2	0.0584421	8	0.218939
Trial 8	6.3	Rep	F	0:08:19.016-0:08:19.282	IT2	0.156829	8	0.587516
Trial 8	6.3	Rep	F	0:08:19.282-0:08:19.548	IT2	0.130409	8	0.488546
Trial 8	6.3	Rep	F	0:08:19.548-0:08:19.814	IT2	0.246258	8	0.922547
Trial 8	6.3	Rep	F	0:08:19.814-0:08:20.080	IT2	0.271985	8	1.01892
Trial 8	6.3	Rep	F	0:08:20.080-0:08:20.346	IT2	0.560823	8	2.10099
Trial 8	6.3	Rep	F	0:08:20.346-0:08:20.612	IT2	0.696836	8	2.61051
Trial 8	6.3	Rep	F	0:08:20.612-0:08:20.878	IT2	0.630354	8	2.36147
Trial 8	6.3	Rep	F	0:08:20.878-0:08:21.144	IT2	0.294657	8	1.10386
Trial 8	6.3	Rep	F	0:08:21.144-0:08:21.410	IT2	0.493965	8	1.85052
Trial 8	6.3	Rep	F	0:08:21.410-0:08:21.676	IT2	0.200463	8	0.750981
Trial 8	6.3	Rep	F	0:08:21.676-0:08:21.942	IT2	0.226623	8	0.848982
Trial 8	6.3	Rep	F	0:08:21.942-0:08:22.208	IT2	0.138776	8	0.519892
Trial 8	6.3	Rep	F	0:08:22.208-0:08:22.474	IT2	0.163937	8	0.614149
Trial 8	6.3	Rep	F	0:08:22.474-0:08:22.740	IT2	0.162018	8	0.606961
Trial 8	6.3	Rep	F	0:08:22.740-0:08:23.006	IT2	0.0858118	8	0.321471
Trial 8	6.3	Rep	F	0:08:23.006-0:08:23.272	IT2	0.0678313	8	0.254112
Trial 8	6.3	Rep	F	0:08:23.272-0:08:23.538	IT2	0.104368	8	0.390989
Trial 8	6.3	Rep	F	0:08:23.538-0:08:23.804	IT2	0.042687	8	0.159916
Trial 8	6.3	Rep	F	0:08:23.804-0:08:24.070	IT2	0.0808168	7	0.346011
Trial 8	6.3	Rep	F	0:08:24.070-0:08:24.336	IT2	0.028688	8	0.107473
Trial 8	6.3	Rep	F	0:08:24.336-0:08:24.602	IT2	0.0661253	8	0.247721
Trial 8	6.3	Rep	F	0:08:24.602-0:08:24.868	IT2	0.0474386	8	0.177716
Trial 8	6.3	Rep	F	0:08:24.868-0:08:25.134	IT2	0.0707903	8	0.265197
Trial 8	6.3	Rep	F	0:08:25.134-0:08:25.400	IT2	0.0593076	8	0.222181
Trial 8	6.3	Rep	F	0:08:25.400-0:08:25.666	IT2	0.0364515	8	0.136556
Trial 8	6.3	Rep	F	0:08:25.666-0:08:25.932	IT2	0.0560853	8	0.210109
Trial 8	6.3	Rep	F	0:08:25.932-0:08:26.198	IT2	0.0226052	8	0.0846847
Trial 8	6.3	Rep	F	0:08:26.198-0:08:26.464	IT2	0.0478513	8	0.179263
Trial 8	6.3	Rep	F	0:08:26.464-0:08:26.730	IT2	0.0897063	8	0.336061
Trial 8	6.3	Rep	F	0:08:26.730-0:08:26.996	IT2	0.135323	8	0.506955
Trial 8	6.3	Rep	F	0:08:26.996-0:08:27.262	IT2	0.188973	8	0.707943
Trial 8	6.3	Rep	F	0:08:27.262-0:08:27.528	IT2	0.13005	8	0.487199
Trial 8	6.3	Rep	F	0:08:27.528-0:08:27.794	IT2	0.1461	8	0.547329
Trial 8	6.3	Rep	F	0:08:27.794-0:08:28.060	IT2	0.0933698	8	0.349786
Trial 8	6.3	Rep	F	0:08:28.060-0:08:28.326	IT2	0.184069	8	0.689575
Trial 8	6.3	Rep	F	0:08:28.326-0:08:28.592	IT2	0.113018	8	0.423392
Trial 8	6.3	Rep	F	0:08:28.592-0:08:28.858	IT2	0.100759	8	0.377468
Trial 8	6.3	Rep	F	0:08:28.858-0:08:29.124	IT2	0.0507336	8	0.19006
Trial 8	6.3	Rep	F	0:08:29.124-0:08:29.390	IT2	0.0739877	8	0.277176
Trial 8	6.3	Rep	F	0:08:29.390-0:08:29.656	IT2	0.0795831	8	0.298139
Trial 8	6.3	Rep	F	0:08:29.656-0:08:29.922	IT2	0.0480457	8	0.179991
Trial 8	6.3	Rep	F	0:08:29.922-0:08:30.188	IT2	0.13451	8	0.503911
Trial 8	6.3	Rep	F	0:08:30.188-0:08:30.454	IT2	0.121777	8	0.456208
Trial 8	6.3	Rep	F	0:08:30.454-0:08:30.720	IT2	0.232743	8	0.871912
Trial 8	6.3	Rep	F	0:08:30.720-0:08:30.986	IT2	0.244838	8	0.917229
Trial 8	6.3	Rep	F	0:08:30.986-0:08:31.252	IT2	0.193653	8	0.725468
Trial 8	6.3	Rep	F	0:08:31.252-0:08:31.518	IT2	0.249502	8	0.934697
Trial 8	6.3	Rep	F	0:08:31.518-0:08:31.784	IT2	0.251327	8	0.941533
Trial 8	6.3	Rep	F	0:08:31.784-0:08:32.050	IT2	0.167591	8	0.627835
Trial 8	6.3	Rep	F	0:08:32.050-0:08:32.316	IT2	0.0517201	8	0.193756
Trial 8	6.3	Rep	F	0:08:32.316-0:08:32.582	IT2	0.0760092	8	0.28475
Trial 8	6.3	Rep	F	0:08:32.582-0:08:32.848	IT2	0.0753465	8	0.282265
Trial 8	6.3	Rep	F	0:08:32.848-0:08:33.114	IT2	0.0321931	8	0.120604
Trial 8	6.3	Rep	F	0:08:33.114-0:08:33.380	IT2	0.0369726	7	0.158296
Trial 8	6.3	Rep	F	0:08:33.380-0:08:33.646	IT2	0.0723185	8	0.270922
Trial 8	6.3	Rep	F	0:08:33.646-0:08:33.912	IT2	0.0591531	8	0.221603
Trial 8	6.3	Rep	F	0:08:33.912-0:08:34.178	IT2	0.0470159	8	0.176133
Trial 8	6.3	Rep	F	0:08:34.178-0:08:34.444	IT2	0.041265	8	0.15459
Trial 8	6.3	Rep	F	0:08:34.444-0:08:34.710	IT2	0.118835	8	0.445184
Trial 8	6.3	Rep	F	0:08:34.710-0:08:34.976	IT2	0.0984375	8	0.36877
Trial 8	6.3	Rep	F	0:08:34.976-0:08:35.242	IT2	0.0565863	8	0.211987
Trial 8	6.3	Rep	F	0:08:35.242-0:08:35.508	IT2	0.0701107	8	0.262653
Trial 8	6.3	Rep	F	0:08:35.508-0:08:35.774	IT2	0.0785199	8	0.294158
Trial 8	6.3	Rep	F	0:08:35.774-0:08:36.040	IT2	0.100884	8	0.377937
Trial 8	6.3	Rep	F	0:08:36.040-0:08:36.306	IT2	0.0384266	8	0.143956
Trial 8	6.3	Rep	F	0:08:36.306-0:08:36.572	IT2	0.116297	8	0.435681
Trial 8	6.3	Rep	F	0:08:36.572-0:08:36.838	IT2	0.120036	8	0.449685
Trial 8	6.3	Rep	F	0:08:36.838-0:08:37.104	IT2	0.141203	8	0.52898
Trial 8	6.3	Rep	F	0:08:37.104-0:08:37.370	IT2	0.0965568	8	0.361725
Trial 8	6.3	Rep	F	0:08:37.370-0:08:37.636	IT2	0.0599188	8	0.224471
Trial 8	6.3	Rep	F	0:08:37.636-0:08:37.902	IT2	0.0747428	8	0.280005
Trial 8	6.3	Rep	F	0:08:37.902-0:08:38.168	IT2	0.080194	8	0.300426
Trial 8	6.3	Rep	F	0:08:38.168-0:08:38.434	IT2	0.113752	8	0.426147
Trial 8	6.3	Rep	F	0:08:38.434-0:08:38.700	IT2	0.279538	8	1.04722
Trial 8	6.3	Rep	F	0:08:38.700-0:08:38.966	IT2	0.0916259	8	0.343254
Trial 8	6.3	Rep	F	0:08:38.966-0:08:39.232	IT2	0.0844034	8	0.316197
Trial 8	6.3	Rep	F	0:08:39.232-0:08:39.498	IT2	0.0831849	8	0.311631
Trial 8	6.3	Rep	F	0:08:39.498-0:08:39.764	IT2	0.0937214	8	0.351103
Trial 8	6.3	Rep	F	0:08:39.764-0:08:40.030	IT2	0.0502509	8	0.188252
Trial 8	6.3	Rep	F	0:08:40.030-0:08:40.296	IT2	0.133963	8	0.501858
Trial 8	6.3	Rep	F	0:08:40.296-0:08:40.562	IT2	0.180686	8	0.676895
Trial 8	6.3	Rep	F	0:08:40.562-0:08:40.828	IT2	0.131589	8	0.492963
Trial 8	6.3	Rep	F	0:08:40.828-0:08:41.094	IT2	0.0850422	8	0.318591
Trial 8	6.3	Rep	F	0:08:41.094-0:08:41.360	IT2	0.100093	8	0.374973
Trial 8	6.3	Rep	F	0:08:41.360-0:08:41.626	IT2	0.0684254	8	0.256338
Trial 8	6.3	Rep	F	0:08:41.626-0:08:41.892	IT2	0.108255	8	0.40555
Trial 8	6.3	Rep	F	0:08:41.892-0:08:42.158	IT2	0.19991	8	0.748915
Trial 8	6.3	Rep	F	0:08:42.158-0:08:42.424	IT2	0.109707	8	0.410992
Trial 8	6.3	Rep	F	0:08:42.424-0:08:42.690	IT2	0.14158	8	0.530396
Trial 8	6.3	Rep	F	0:08:42.690-0:08:42.956	IT2	0.137482	7	0.588617
Trial 8	6.3	Rep	F	0:08:42.956-0:08:43.222	IT2	0.168901	8	0.632745
Trial 8	6.3	Rep	F	0:08:43.222-0:08:43.488	IT2	0.0725201	8	0.27168
Trial 8	6.3	Rep	F	0:08:43.488-0:08:43.754	IT2	0.0773209	8	0.289664
Trial 8	6.3	Rep	F	0:08:43.754-0:08:44.020	IT2	0.126896	8	0.475383
Trial 8	6.3	Rep	F	0:08:44.020-0:08:44.286	IT2	0.153516	8	0.57511
Trial 8	6.3	Rep	F	0:08:44.286-0:08:44.552	IT2	0.0745708	8	0.279362
Trial 8	6.3	Rep	F	0:08:44.552-0:08:44.818	IT2	0.0529758	8	0.198461
Trial 8	6.3	Rep	F	0:08:44.818-0:08:45.084	IT2	0.113032	8	0.423443
Trial 8	6.3	Rep	F	0:08:45.084-0:08:45.350	IT2	0.0665786	8	0.249421
Trial 8	6.3	Rep	F	0:08:45.350-0:08:45.616	IT2	0.0607401	8	0.227546
Trial 8	6.3	Rep	F	0:08:45.616-0:08:45.882	IT2	0.0471333	8	0.176573
Trial 8	6.3	Rep	F	0:08:45.882-0:08:46.148	IT2	0.0834257	8	0.312531
Trial 8	6.3	Rep	F	0:08:46.148-0:08:46.414	IT2	0.0851137	8	0.318858
Trial 8	6.3	Rep	F	0:08:46.414-0:08:46.680	IT2	0.027251	8	0.102089
Trial 8	6.3	Rep	F	0:08:46.680-0:08:46.946	IT2	0.0556916	8	0.208635
Trial 8	6.3	Rep	F	0:08:46.946-0:08:47.212	IT2	0.0723823	8	0.271162
Trial 8	6.3	Rep	F	0:08:47.212-0:08:47.478	IT2	0.106399	8	0.3986
Trial 8	6.3	Rep	F	0:08:47.478-0:08:47.744	IT2	0.0731398	8	0.273999
Trial 8	6.3	Rep	F	0:08:47.744-0:08:48.010	IT2	0.111008	8	0.415864
Trial 8	6.3	Rep	F	0:08:48.010-0:08:48.276	IT2	0.0935179	8	0.35034
Trial 8	6.3	Rep	F	0:08:48.276-0:08:48.542	IT2	0.062734	8	0.235017
Trial 8	6.3	Rep	F	0:08:48.542-0:08:48.808	IT2	0.0854876	8	0.32026
Trial 8	6.3	Rep	F	0:08:48.808-0:08:49.074	IT2	0.026172	8	0.0980467
Trial 8	6.3	Rep	F	0:08:49.074-0:08:49.340	IT2	0.0526994	8	0.197425
Trial 8	6.3	Rep	F	0:08:49.340-0:08:49.606	IT2	0.0242823	8	0.0909668
Trial 8	6.3	Rep	F	0:08:49.606-0:08:49.872	IT2	0.0591453	8	0.221574
Trial 8	6.3	Rep	F	0:08:49.872-0:08:50.138	IT2	0.0371538	8	0.139187
Trial 8	6.3	Rep	F	0:08:50.138-0:08:50.404	IT2	0.0224293	8	0.0840259
Trial 8	6.3	Rep	F	0:08:50.404-0:08:50.670	IT2	0.073629	8	0.275832
Trial 8	6.3	Rep	F	0:08:50.670-0:08:50.936	IT2	0.0552479	8	0.206972
Trial 8	6.3	Rep	F	0:08:50.936-0:08:51.202	IT2	0.0340524	8	0.127568
[truncated: 1,890 more rows]
