# Supplementary material for: Conditional and unconditional components of aversively motivated freezing, flight and darting in mice
Source: eLife. 2022 May 26;11:e75663. doi: 10.7554/eLife.75663 (PMC9173745; doi:10.7554/eLife.75663)
Supplement: Figure 2—figure supplement 1—source data 1. [file elife-75663-fig2-figsupp1-data1.xlsx]

## Sheet: Sheet1
Data from Experiment 1: CS Duration Group for freezing, PAR, and darting across Day 1 and Day 2 - acquisiton and Day 3 - testing.
Grey = Data Irrelevant/Not Available
As seen in Figure 2-figure supplement 1
					Day 1						Day 2						Day 3
Experiment	Group	Measure	Sex	CS	BL	1	2	3	4	5	BL	6	7	8	9	10	BL	1	2	3	4	5	6	7	8	9	10	11	12	13	14	15	16
1	CS Duration	Freezing	F	preCS	10.44	11.33	0	77	85.33	100	85.65	100	100	99.67	100	100	89.83	46.67	62	100	100	100	100	97.33	87	55	75.33	100	10.33	0	0	10	42
1	CS Duration	Freezing	F	preCS	3.19	0	0	88	100	100	97.87	100	100	100	100	100	71.46	0	82	57.67	35.33	100	100	0	99.33	57	49.33	0	44.33	0	0	0	13
1	CS Duration	Freezing	F	preCS	3.74	0	46	99.67	99.67	100	86.44	100	100	100	100	100	92.83	100	100	100	100	100	38.67	100	100	100	100	100	100	100	0	0	0
1	CS Duration	Freezing	F	preCS	2.35	31.33	70	35.67	38.67	85.33	62.74	99.67	100	100	100	100	58.94	91.67	100	100	14.67	33.67	95	100	0	31	100	0	33	46	100	100	0
1	CS Duration	Freezing	M	preCS	0	0	0	70.67	80.33	60.67	79.78	69.33	86.67	10.33	100	96	77.22	75.33	100	64.33	100	100	94.67	83.67	77.67	24	85	15	24.33	20	73	57.67	23.33
1	CS Duration	Freezing	M	preCS	0.57	0	0	100	100	100	95.26	100	100	100	100	100	96.22	91	100	100	97.33	100	86.33	100	81.67	82.67	100	44.33	100	96.33	69.67	0	37
1	CS Duration	Freezing	M	preCS	0	0	14.67	60.33	100	100	87.74	100	86	100	100	100	90.98	100	69.67	100	100	100	100	100	100	49.67	100	100	100	100	0	0	0
1	CS Duration	Freezing	M	preCS	3.13	0	26.67	93	37.33	100	90.63	99.67	100	93.67	80.33	95	72.85	72.33	82	100	80.33	92.67	95.67	62.67	90	0	58	98	10.33	0	0	75.33	0
1	CS Duration	Freezing	F	Noise		46.33	52.67	50.67	69.67	44.33		45	60	0	56.33	18.33		28.67	44	33	85	54.33	72	72	23.67	64	90	30.67	77.33	60.67	31.67	73	93.67
1	CS Duration	Freezing	F	Noise		10.67	64.33	33	39	0		14.33	45.33	17	50.33	0		31	34	33.33	49.33	53.33	41.67	80	64.33	67.67	44.67	78.33	82.33	58	81.33	70.67	59.67
1	CS Duration	Freezing	F	Noise		66	55	85.67	0	30.67		65	0	32	82.67	20		37.67	23	47	23	24.33	65	12.33	66	82	74	80.33	81.33	87.67	13	82	85.33
1	CS Duration	Freezing	F	Noise		0	45	54.33	11	34.67		0	20.33	15.33	21.67	75.67		63	69	70	95.33	68.67	96	95.67	60	79.33	94	53.33	86	84.67	97.33	97.33	71.67
1	CS Duration	Freezing	M	Noise		0	82.33	54.67	48	12		48.33	75	10.33	82.67	86.67		58.67	87	96.67	88.67	97.33	97.33	95.67	55.67	52	69.67	80	87.33	97	80	95.67	93.33
1	CS Duration	Freezing	M	Noise		0	78	47.67	86.33	58.67		41.33	31	58.67	85	23		97.33	84	53	56.67	83.33	96	77	80.33	81.67	75.33	87.67	89	97.33	93.33	83	95.67
1	CS Duration	Freezing	M	Noise		52.67	53.33	34.67	0	53		23.33	0	0	24.67	0		37	31	67.67	56.67	91.33	85.33	98	52.67	93.33	86.67	74.67	79	83	64.67	20.67	84
1	CS Duration	Freezing	M	Noise		10.67	62.67	14.67	36.33	11		39	38.33	73	46.67	28.67		10	82	79.33	56.67	62.33	95.33	80.33	78	66	88	86.33	77.67	94	58.33	76.67	86.33
1	CS Duration	PAR	F	Noise		0.433759	0.437208	0.9012	0.963965	0.998132		0.999743	0.998516	0.997357	0.999561	0.999118		0.896112	0.737652	0.999109	0.998621	0.999112	0.993608	0.975899	0.988909	0.596584	0.605455	0.999043	0.535706	0.363157	0.685459	0.621622	0.305791
1	CS Duration	PAR	F	Noise		0.572194	0.315947	0.990181	0.999507	0.999693		0.999649	0.999232	0.998367	0.999544	0.999699		0.701387	0.968242	0.889433	0.795839	0.99858	0.998336	0.44566	0.982186	0.820348	0.915607	0.30112	0.711396	0.451293	0.328373	0.22444	0.237866
1	CS Duration	PAR	F	Noise		0.33217	0.56803	0.859873	0.999146	0.99962		0.998069	0.999742	0.99909	0.975186	0.999436		0.998673	0.999086	0.998702	0.99886	0.998178	0.60114	0.999349	0.993256	0.977273	0.972452	0.97955	0.977728	0.975	0.587275	0.240189	0.187313
1	CS Duration	PAR	F	Noise		0.672993	0.806494	0.75809	0.902357	0.988328		0.997425	0.9992	0.999563	0.997744	0.995979		0.963956	0.977324	0.9842	0.0786177	0.715134	0.296089	0.734513	0.449328	0.494416	0.82659	0.37049	0.285276	0.307627	0.824561	0.806452	0.235465
1	CS Duration	PAR	M	Noise		0.322486	0.177338	0.967307	0.984235	0.91904		0.89419	0.888755	0.825799	0.967742	0.979683		0.900388	0.958678	0.457912	0.953271	0.88	0.288066	0.272031	0.953866	0.490414	0.941495	0.12692	0.477545	0.0732394	0.55411	0.256989	0.133333
1	CS Duration	PAR	M	Noise		0.671751	0.191074	0.999115	0.999515	0.999442		0.998035	0.99926	0.996982	0.98679	0.999252		0.666667	0.998101	0.99924	0.988796	0.996863	0.610675	0.993547	0.936505	0.94086	0.993099	0.121073	0.97561	0.484615	0.195152	0.422427	0.361878
1	CS Duration	PAR	M	Noise		0.431493	0.737575	0.937028	0.97921	0.999699		0.999482	0.985666	0.999646	0.999636	0.999463		0.999229	0.963351	0.996129	0.999188	0.984802	0.960784	0.855072	0.977925	0.146818	0.963235	0.96904	0.981618	0.96997	0.327698	0.6446	0.270079
1	CS Duration	PAR	M	Noise		0.413949	0.295504	0.0166955	0.0551626	0.00116727		0.996418	0.999161	0.975871	0.966257	0.978621		0.959982	0.973713	0.998035	0.944206	0.97812	0.868955	0.57056	0.860502	0.431418	0.192704	0.734375	0.208554	0.0809133	0.357862	0.531818	0.105394
1	CS Duration	Darting	F	preCS	0.666667	0	0	0	0	0	0	0	0	0	0	0	0	0	0	0	0	0	0	0	0	0	0	0	0	0	0	0	0
1	CS Duration	Darting	F	preCS	0.333333	0	0	0	0	0	0	0	0	0	0	0	0	0	0	0	0	0	0	0	0	0	0	0	0	0	0	0	0
1	CS Duration	Darting	F	preCS	0.666667	0	0	0	0	0	0	0	0	0	0	0	0	0	0	0	0	0	0	0	0	0	0	0	0	0	0	0	0
1	CS Duration	Darting	F	preCS	0	0	0	0	0	0	0	0	0	0	0	0	0	0	0	0	0	0	0	0	0	0	0	0	0	0	0	0	0
1	CS Duration	Darting	M	preCS	0	0	0	0	0	0	0	0	0	0	0	0	0	0	0	0	0	0	0	0	0	0	0	0	0	0	0	0	0
1	CS Duration	Darting	M	preCS	0	0	0	0	0	0	0	0	0	0	0	0	0.333333	0	0	0	0	0	0	0	0	0	0	0	0	0	0	0	0
1	CS Duration	Darting	M	preCS	0	0	0	0	0	0	0	0	0	0	0	0	0	0	0	0	0	0	0	0	0	0	0	0	0	0	0	0	0
1	CS Duration	Darting	M	preCS	0	0	0	0	0	0	0	0	0	0	0	0	0	0	0	0	0	0	0	0	0	0	0	0	0	0	0	0	0
1	CS Duration	Darting	F	Noise		0	0	6	12	6		12	12	6	6	0		6	6	6	6	6	0	0	0	6	0	0	0	0	0	0	0
1	CS Duration	Darting	F	Noise		0	0	12	6	6		0	0	0	0	6		6	0	0	0	0	0	0	6	6	0	0	0	0	0	0	0
1	CS Duration	Darting	F	Noise		0	6	6	0	6		12	12	12	12	24		6	0	0	6	0	0	0	0	0	0	0	0	0	0	0	6
1	CS Duration	Darting	F	Noise		0	0	12	12	12		6	6	0	0	6		0	6	6	6	0	0	6	6	6	0	0	0	0	0	6	0
1	CS Duration	Darting	M	Noise		6	0	12	12	12		18	6	12	12	18		12	12	12	12	6	6	6	6	6	6	6	6	6	6	6	0
1	CS Duration	Darting	M	Noise		6	0	0	12	12		18	6	12	0	6		6	0	0	0	6	0	0	6	0	0	6	0	0	0	0	0
1	CS Duration	Darting	M	Noise		6	0	0	12	6		6	18	6	0	6		6	6	6	6	0	0	12	0	0	0	0	0	0	0	0	0
1	CS Duration	Darting	M	Noise		0	0	0	6	12		12	6	12	12	6		0	0	0	6	6	0	0	0	0	0	0	6	0	6	0	0
