# Supplementary material for: Conditional and unconditional components of aversively motivated freezing, flight and darting in mice
Source: eLife. 2022 May 26;11:e75663. doi: 10.7554/eLife.75663 (PMC9173745; doi:10.7554/eLife.75663)
Supplement: Figure 2—source data 1. [file elife-75663-fig2-data1.xlsx]

## Sheet: Sheet1
Combined data from Experiment 1: Replication Group and Stimulus Change Group for freezing, PAR, and darting across Day 1 and Day 2 - acquisiton and Day 3 - testing.
Grey = Data Irrelevant/Not Available
As seen in Figure 2
					Day 1						Day 2						Day 3
Experiment	Group	Measure	Sex	CS	BL	1	2	3	4	5	BL	6	7	8	9	10	BL	1	2	3	4	5	6	7	8	9	10	11	12	13	14	15	16
1	Replication	Freezing	F	Tone	0	0	46.67	47.67	45	93	66.11	14.33	98.33	100	91.33	100	69.56	97	100	100	100	94.67	100	82.33	97.33	93.67	41.67	88.67	66.33	82.67	94	93	85
1	Replication	Freezing	F	Tone	1	0	64.33	57.33	100	100	37.52	74	100	100	100	100	77.24	81	52.67	100	100	100	100	100	100	100	100	100	98	83	94.33	100	97.67
1	Replication	Freezing	F	Tone	1.3	0	14.33	83.33	91.33	36	44.87	14.67	29.33	54.67	14	27	76.7	31	100	100	73.33	74.33	74.33	56.67	97	98.33	99	96.67	100	98	74.67	57.33	100
1	Replication	Freezing	M	Tone	0	0	89.33	21.33	100	83	40.28	68.33	96	45.67	62.67	95.67	42.07	38	87.67	96	100	100	100	100	74.67	98.33	100	100	97	88.33	100	57.33	97
1	Replication	Freezing	M	Tone	0	0	68.33	38.67	98.67	86.67	77.22	100	97.33	100	97.33	100	55.98	69	74.67	100	100	44.33	78.67	81.67	82.67	75.33	80	98	100	72.33	100	77.33	90.33
1	Replication	Freezing	M	Tone	0	0	0	54.67	80.67	38.33	55.43	0	97.33	67.67	95.33	85	77	100	95.33	95	33.67	100	81	87	92.33	95	94.33	86.33	95.67	96.67	95.33	92.67	90.33
1	Replication	Freezing	M	Tone	0	0	82.67	98.67	100	89	55.26	97.67	98.33	100	84.67	100	31.41	26.33	15.67	49	67.67	78.33	60.67	60.33	66.33	99.67	93.33	64.67	52.33	52.33	69.67	70.67	100
1	Replication	Freezing	F	Noise		10.67	21	51.67	35.67	52		13.67	38.67	91.33	91.67	50.33		19	88.33	96.33	96.33	65.33	71	67.67	0	86.33	72.67	82.67	91	58.33	54	90.67	86
1	Replication	Freezing	F	Noise		0	84	69.67	79.33	86.67		11	29	14.67	21.33	13.67		25.67	41.33	31.33	54.33	37.67	95.67	73	92.33	70.67	73.67	67	93	76.67	83	92.67	95.33
1	Replication	Freezing	F	Noise		10.33	28	49.67	47.67	70		12.33	0	53.33	0	15		15.33	55.33	17.33	18.33	39.33	49	65	35.67	43.33	67	56.33	42.67	66.67	61.67	55.33	57.67
1	Replication	Freezing	M	Noise		54.33	73.67	50.33	57.67	77.67		62.67	63.33	87.67	79.33	61.67		0	0	62.67	0	75	51.33	17.33	18.33	0	65.67	0	0	0	26.67	79.33	14
1	Replication	Freezing	M	Noise		10.67	79.33	17	0	23		39.33	55	42.67	11.33	97		0	0	0	0	16	26	68	18.33	64.33	11	13.67	62.33	83.67	12	50.33	69.33
1	Replication	Freezing	M	Noise		0	42.67	64	18.67	68		15.67	0	45	66.67	12.67		61.33	43.67	26	21	32.67	81.33	54	58.33	77	58	43	59.67	67.67	64.67	88.67	81.33
1	Replication	Freezing	M	Noise		0	53.33	47.67	30	30.33		0	0	27.33	11	32		0	32	53	44.33	24.67	30.33	0	54	20.33	20	70.67	77.33	68.67	58.67	65	32
1	Stimulus Change	Freezing	F	Tone	0.67	0	17.67	79.17	86.83	97.67	79.41	99.83	96.17	100	100	100	48.89	74	100	100	55	100	24.67	97.67	94.33	94.67	100	99.33	88	81.67	96	60	100
1	Stimulus Change	Freezing	F	Tone	0	0	25.5	35.33	85	79	56.33	34.83	42.83	100	47.17	99.83	81.28	73	82.33	96.33	49.67	82	100	95.67	95.67	91.33	96.33	97	86.33	97.67	97	100	86
1	Stimulus Change	Freezing	F	Tone	0.57	0	7.5	52.83	58.17	98.83	66.3	32.17	72.5	82.17	56.5	77.83	51.43	15.33	28.67	52.33	92.33	100	100	100	100	67.33	86	100	100	60.67	75.67	100	98.33
1	Stimulus Change	Freezing	M	Tone	0	0	34	61.33	98.33	63	38.96	89.83	100	100	100	74.67	42.07	38	87.67	96	100	100	100	100	74.67	98.33	100	100	97	88.33	100	57.33	97
1	Stimulus Change	Freezing	M	Tone	1.24	0	50.33	95.67	45.67	79.33	65.5	82.33	67.17	66.83	63	100	55.98	69	74.67	100	100	44.33	78.67	81.67	82.67	75.33	80	98	100	72.33	100	77.33	90.33
1	Stimulus Change	Freezing	M	Tone	0.59	0	35.17	78.17	71.83	95.17	81.22	91.83	88.5	64.33	100	49.5	77	100	95.33	95	33.67	100	81	87	92.33	95	94.33	86.33	95.67	96.67	95.33	92.67	90.33
1	Stimulus Change	Freezing	M	Tone	0	0	5.83	52.5	47.5	75.17	47.74	68	46.5	57	72	49.67	31.41	26.33	15.67	49	67.67	78.33	60.67	60.33	66.33	99.67	93.33	64.67	52.33	52.33	69.67	70.67	100
1	Stimulus Change	Freezing	F	Noise														19	88.33	96.33	96.33	65.33	71	67.67	0	86.33	72.67	82.67	91	58.33	54	90.67	86
1	Stimulus Change	Freezing	F	Noise														25.67	41.33	31.33	54.33	37.67	95.67	73	92.33	70.67	73.67	67	93	76.67	83	92.67	95.33
1	Stimulus Change	Freezing	F	Noise														15.33	55.33	17.33	18.33	39.33	49	65	35.67	43.33	67	56.33	42.67	66.67	61.67	55.33	57.67
1	Stimulus Change	Freezing	M	Noise														0	0	62.67	0	75	51.33	17.33	18.33	0	65.67	0	0	0	26.67	79.33	14
1	Stimulus Change	Freezing	M	Noise														0	0	0	0	16	26	68	18.33	64.33	11	13.67	62.33	83.67	12	50.33	69.33
1	Stimulus Change	Freezing	M	Noise														61.33	43.67	26	21	32.67	81.33	54	58.33	77	58	43	59.67	67.67	64.67	88.67	81.33
1	Stimulus Change	Freezing	M	Noise														0	32	53	44.33	24.67	30.33	0	54	20.33	20	70.67	77.33	68.67	58.67	65	32
1	Replication	PAR	F	Tone		0.49	0.52	0.91	0.72	0.54		0.91	0.49	0	0.94	0.99		0.15	0	0.01	0.5	0.61	0.1	0.71	0.38	0.6	0.58	0.34	0.74	0.5	0.56	0.46	0.48
1	Replication	PAR	F	Tone		0.42	0.59	0.84	0.92	0.92		0.51	0.97	0.99	0.5	0.5		0.59	0.56	0.5	0.92	0.01	0.01	0.11	0.01	0.5	0.92	0.08	0.09	0.57	0.34	0.02	0.36
1	Replication	PAR	F	Tone		0.56	0.72	0.51	0.27	1		0.87	0.65	0.95	0.95	1		0.88	0	0.5	0.53	0.79	1	0.85	0.59	0.37	0.43	0.22	0	0.17	0.66	0.45	0
1	Replication	PAR	M	Tone		0.55	0.28	1	0	0.6		0.92	0.61	0.85	0.9	0.46		0.83	0.01	0.37	0.33	0.64	0.18	0.19	0.2	0.44	0.02	0.76	0.01	0.26	0.21	0.02	0
1	Replication	PAR	M	Tone		0.41	0.31	0.98	0.6	0.6		0.92	0.73	0.16	0.43	0		0.43	0	0	0.35	0.04	0.41	0.59	0.1	0.37	0.41	0.01	0.25	0.55	0.69	0.13	0.38
1	Replication	PAR	M	Tone		0.4	0.44	0.54	0.52	0.96		0.91	0.38	0.78	0.54	0.53		0.08	0.91	0.87	0.46	0.18	0.57	0.01	0.13	0.02	0.75	0.5	0.19	0.12	0.17	0.71	0.39
1	Replication	PAR	M	Tone		0.3	0.37	0.43	0.09	0.64		0.32	0.12	0.5	1	0		0.16	0.07	0.5	0	0.49	0.28	0.71	0	0.5	0.48	0.11	0.29	0.08	0.48	0.47	0
1	Replication	PAR	F	Noise		0.43	0.66	0.93	0.73	0.76		0.92	0.88	0.85	0.95	1		0.82	0.78	0.19	1	0.7	0.58	0.5	0.96	0.62	0.72	0.55	0.44	0.91	0.89	0.55	0.25
1	Replication	PAR	F	Noise		0.48	0.28	0.81	1	1		0.66	1	1	1	1		0.81	0.6	1	1	0.93	0.51	0.57	0.76	1	1	0.99	0.3	0.5	0.27	0.21	0.38
1	Replication	PAR	F	Noise		0.46	0.88	0.98	0.91	1		0.87	0.95	0.92	0.97	1		0.93	0.92	1	0.72	0.9	1	0.82	0.97	0.9	0.8	0.8	0.98	0.77	0.82	0.81	0.96
1	Replication	PAR	M	Noise		0.49	0.28	1	0.9	0.69		0.93	0.93	0.53	0.89	0.9		0.9	0.67	0.53	0.74	0.73	0.58	0.19	0.41	0.52	0.47	0.82	0.94	0.64	0.12	0.48	0.67
1	Replication	PAR	M	Noise		0.33	0.65	0.98	0.98	0.98		1	0.94	0.93	0.92	0.39		0.88	0.16	0.49	0.47	0.14	0.19	0.64	0.86	0.54	0.48	0.28	0.34	0.79	0.38	0.44	0.23
1	Replication	PAR	M	Noise		0.35	0.51	0.31	0.98	0.68		0.94	0.95	0.87	0.82	0.88		1	0.89	0.97	0.94	0.25	0.81	0.51	0.85	0.58	0.64	0.63	0.87	0.59	0.56	0.79	0.62
1	Replication	PAR	M	Noise		0.48	0.75	0.71	0.97	0.96		0.76	0.83	1	1	0.99		0.93	0.74	1	0.91	0.75	0.87	0.71	0.92	1	0.86	0.42	0.71	0.73	0.7	0.76	0.83
1	Stimulus Change	PAR	F	Tone		0.59	0.41	0.43	1	1		0.41	0.97	0.92	0.92	0.01		0.48434	0.5	0.642857	0.997141	0.5	0.972298	0.0161126	0.817391	0.232632	0.5	0.143508	0.966443	0.543986	0.045302	0.492642	0.5
1	Stimulus Change	PAR	F	Tone		0.47	0.82	0.79	0.98	1		0.92	1	0.93	1	0.99		0.855422	0.696023	0.645714	0.998265	0.982079	0.5	0.30597	0.0793374	0.280455	0.0259505	0.337662	0.0439452	0.0420918	0.0530726	0.5	0.451051
1	Stimulus Change	PAR	F	Tone		0.5	0.54	0.95	0.98	0.35		0.7	0.93	1	1	0.95		0.900755	0.994705	0.991662	0.106336	0.5	0.0636943	0.00804682	0.5	0.750583	0.171541	0.00731529	0.0621118	0.449423	0.398847	0.0152905	0.198582
1	Stimulus Change	PAR	M	Tone		0.56	0.51	0.81	0.47	0.7		0.3	0	0	0.01	0.69		0.959069	0.148211	0.305118	0.037594	0.0658683	0.0572289	0.5	0.217255	0.0327409	0.0161812	0.0298507	0.043394	0.206506	0.00439174	0.570854	0.258258
1	Stimulus Change	PAR	M	Tone		0.34	0.53	0.41	1	1		0.42	1	0.97	1	0.31		0.757548	0.249784	0.131579	0.208333	0.939063	0.991412	0.749497	0.345675	0.733201	0.955576	0.517413	0.102041	0.69957	0.0239808	0.329594	0.105228
1	Stimulus Change	PAR	M	Tone		0.63	0.52	0.42	0.88	0.98		0.3	1	0.86	0.23	1		0.5	0.951965	0.939024	0.998816	0.0606061	0.256032	0.129767	0.582038	0.0364963	0.946809	0.117899	0.206605	0.153428	0.0828441	0.0789054	0.0902015
1	Stimulus Change	PAR	M	Tone		0.57	0.5	0.86	0.97	0.45		0.94	0.7	0.88	0.88	0.96		0.880675	0.987083	0.564823	0.424591	0.856774	0.998424	0.565983	0.998573	0.180473	0.0638117	0.660297	0.747518	0.832871	0.37979	0.563101	0.263158
1	Stimulus Change	PAR	F	Noise														0.720316	0.997253	0.998903	0.997836	0.992893	0.97771	0.604943	0.987552	0.902813	0.999065	0.97222	0.998549	0.922832	0.515407	0.314228	0.998967
1	Stimulus Change	PAR	F	Noise														0.995246	0.986832	0.993068	0.998138	0.998953	0.998064	0.68757	0.43378	0.528723	0.651667	0.976519	0.508035	0.626089	0.314598	0.986945	0.763335
1	Stimulus Change	PAR	F	Noise														0.522206	0.995832	0.998222	0.82321	0.999409	0.988114	0.279873	0.998729	0.48525	0.164255	0.338694	0.974613	0.120486	0.425152	0.187894	0.699867
1	Stimulus Change	PAR	M	Noise														0.980328	0.966916	0.966058	0.992047	0.736486	0.643101	0.999011	0.879825	0.921583	0.486486	0.984602	0.857308	0.858797	0.80604	0.543306	0.973695
1	Stimulus Change	PAR	M	Noise														0.916482	0.868422	0.996531	0.998174	0.953516	0.992973	0.598603	0.62012	0.778131	0.970103	0.991273	0.985133	0.253886	0.950577	0.885025	0.818937
1	Stimulus Change	PAR	M	Noise														0.993307	0.993605	0.99662	0.998499	0.919772	0.17227	0.269993	0.759682	0.236994	0.984496	0.249089	0.458595	0.538553	0.389492	0.134764	0.0879045
1	Stimulus Change	PAR	M	Noise														0.9223	0.987148	0.51437	0.490037	0.898285	0.998728	0.567141	0.998443	0.970894	0.432413	0.71643	0.605861	0.39418	0.282989	0.543372	0.996852
1	Replication	Darting	F	Tone	2.33333	6	0	6	0	0	0	6	0	0	0	0	0	0	0	0	0	0	0	0	0	0	0	0	6	0	0	0	0
1	Replication	Darting	F	Tone	1	0	0	0	0	0	0	6	0	0	0	0	0.333333	0	6	0	0	0	0	0	0	0	0	0	0	0	0	0	0
1	Replication	Darting	F	Tone	0	0	0	0	0	12	0.333333	6	0	6	6	6	0.333333	0	0	0	0	6	6	6	0	0	0	0	0	0	0	0	0
1	Replication	Darting	M	Tone	0.333333	0	0	12	0	6	0	6	0	12	6	0	0.333333	0	0	0	0	0	0	0	0	0	0	0	0	0	0	0	0
1	Replication	Darting	M	Tone	0.666667	0	0	6	0	0	0	0	0	0	0	0	0	0	0	0	0	0	0	0	0	0	0	0	0	0	0	0	0
1	Replication	Darting	M	Tone	0	0	0	0	0	6	0	0	0	6	0	0	0	0	0	0	0	0	0	0	0	0	6	6	0	0	0	0	0
1	Replication	Darting	M	Tone	0.333333	0	0	0	0	0	0	0	0	0	0	0	0	0	0	0	0	0	0	0	0	0	0	0	0	0	0	0	0
1	Replication	Darting	F	Noise		0	6	6	6	0		12	6	0	0	12		6	0	0	0	0	0	0	18	0	6	0	0	6	0	0	0
1	Replication	Darting	F	Noise		0	0	0	0	0		6	12	12	12	6		0	6	6	6	0	0	0	0	0	0	0	0	0	0	0	0
1	Replication	Darting	F	Noise		0	0	6	12	6		0	6	12	12	12		0	0	0	0	0	0	6	6	6	0	12	12	6	6	0	6
1	Replication	Darting	M	Noise		0	0	0	6	6		6	6	0	6	12		12	6	0	6	0	0	0	0	0	0	0	6	0	0	0	0
1	Replication	Darting	M	Noise		0	0	12	12	6		12	6	0	6	0		0	0	0	0	0	0	0	6	0	0	0	0	6	0	0	0
1	Replication	Darting	M	Noise		0	0	0	6	0		6	6	6	0	0		12	0	6	12	0	6	0	0	0	0	6	6	0	6	6	0
1	Replication	Darting	M	Noise		0	0	0	6	6		0	0	6	6	6		0	0	6	0	0	0	0	0	0	0	0	0	0	0	0	0
1	Stimulus Change	Darting	F	Tone	1	0	0	0	0	0	0	0	0	0	0	3	0	0	0	0	12	0	0	0	0	0	0	0	0	0	0	0	0
1	Stimulus Change	Darting	F	Tone	0	0	0	3	3	0	0	6	3	6	6	9	0	6	12	12	0	6	6	6	6	0	0	6	12	6	6	6	0
1	Stimulus Change	Darting	F	Tone	0.666667	0	0	0	0	0	0	0	3	3	0	0	0	0	0	0	0	0	0	0	0	0	0	0	0	0	0	0	0
1	Stimulus Change	Darting	M	Tone	0.333333	0	0	0	0	6	0	0	0	0	0	0	0	0	0	0	0	0	0	0	0	0	0	0	0	0	0	6	0
1	Stimulus Change	Darting	M	Tone	0	0	0	0	0	0	0	0	0	0	0	0	0	0	0	0	0	0	0	0	0	0	0	0	0	0	0	0	0
1	Stimulus Change	Darting	M	Tone	0.333333	3	0	3	3	3	0	9	0	0	0	0	0	0	0	0	0	0	0	0	0	0	0	0	0	0	0	0	0
1	Stimulus Change	Darting	M	Tone	0	3	6	0	3	0	0	0	0	0	0	3	0	18	6	0	0	0	0	0	0	6	0	0	0	6	6	0	0
1	Stimulus Change	Darting	F	Noise														0	0	0	6	0	0	0	0	0	0	0	0	0	0	0	0
1	Stimulus Change	Darting	F	Noise														12	12	6	6	6	6	6	6	6	6	6	6	0	6	6	6
1	Stimulus Change	Darting	F	Noise														0	0	0	0	0	0	0	0	0	0	0	0	0	0	0	0
1	Stimulus Change	Darting	M	Noise														6	6	6	6	0	0	6	12	0	0	12	6	6	6	6	6
1	Stimulus Change	Darting	M	Noise														0	0	0	0	0	0	0	0	0	0	0	0	0	0	0	0
1	Stimulus Change	Darting	M	Noise														0	6	0	6	0	0	0	0	0	6	6	6	0	0	0	0
1	Stimulus Change	Darting	M	Noise														6	12	12	12	12	6	0	6	0	0	0	6	0	6	0	0
