# Supplementary material for: Conditional and unconditional components of aversively motivated freezing, flight and darting in mice
Source: eLife. 2022 May 26;11:e75663. doi: 10.7554/eLife.75663 (PMC9173745; doi:10.7554/eLife.75663)
Supplement: Figure 2—source data 2. [file elife-75663-fig2-data2.xlsx]

## Sheet: Day 1
Raw velocity data, extracted via ethovision, which is fed to R source code 1 to detect and extract darts, and to produce velocity traces
Showing Data from Acquisition Day 1 for all animals in Experiment 1
Used to calculate Darts/minute as seen in Figure 2
Trial	Animal	Group	Sex	TimeStamp	StimPeriod	Distance_cm	Samples	Velocity
Trial 1	1.3	Rep	M	Start-0:00:00.266	BL	1.3962	7	5.97776
Trial 1	1.3	Rep	M	0:00:00.266-0:00:00.532	BL	0.76216	8	2.85525
Trial 1	1.3	Rep	M	0:00:00.532-0:00:00.798	BL	0.860219	8	3.22259
Trial 1	1.3	Rep	M	0:00:00.798-0:00:01.064	BL	0.60389	8	2.26232
Trial 1	1.3	Rep	M	0:00:01.064-0:00:01.330	BL	0.524529	8	1.96501
Trial 1	1.3	Rep	M	0:00:01.330-0:00:01.596	BL	0.324595	8	1.21602
Trial 1	1.3	Rep	M	0:00:01.596-0:00:01.862	BL	1.42104	8	5.32358
Trial 1	1.3	Rep	M	0:00:01.862-0:00:02.128	BL	2.00326	8	7.50472
Trial 1	1.3	Rep	M	0:00:02.128-0:00:02.394	BL	1.36046	8	5.09663
Trial 1	1.3	Rep	M	0:00:02.394-0:00:02.660	BL	2.77639	8	10.401
Trial 1	1.3	Rep	M	0:00:02.660-0:00:02.926	BL	1.59974	8	5.99303
Trial 1	1.3	Rep	M	0:00:02.926-0:00:03.192	BL	0.545526	8	2.04367
Trial 1	1.3	Rep	M	0:00:03.192-0:00:03.458	BL	1.29828	8	4.86372
Trial 1	1.3	Rep	M	0:00:03.458-0:00:03.724	BL	1.40871	8	5.27741
Trial 1	1.3	Rep	M	0:00:03.724-0:00:03.990	BL	1.89831	8	7.11153
Trial 1	1.3	Rep	M	0:00:03.990-0:00:04.256	BL	1.0781	8	4.03885
Trial 1	1.3	Rep	M	0:00:04.256-0:00:04.522	BL	0.796976	8	2.98566
Trial 1	1.3	Rep	M	0:00:04.522-0:00:04.788	BL	1.27488	8	4.77602
Trial 1	1.3	Rep	M	0:00:04.788-0:00:05.054	BL	2.99282	8	11.2119
Trial 1	1.3	Rep	M	0:00:05.054-0:00:05.320	BL	4.45945	8	16.7062
Trial 1	1.3	Rep	M	0:00:05.320-0:00:05.586	BL	3.99949	8	14.9831
Trial 1	1.3	Rep	M	0:00:05.586-0:00:05.852	BL	4.47156	8	16.7516
Trial 1	1.3	Rep	M	0:00:05.852-0:00:06.118	BL	3.3269	8	12.4634
Trial 1	1.3	Rep	M	0:00:06.118-0:00:06.384	BL	1.30414	8	4.88565
Trial 1	1.3	Rep	M	0:00:06.384-0:00:06.650	BL	1.06815	8	4.00154
Trial 1	1.3	Rep	M	0:00:06.650-0:00:06.916	BL	2.4298	8	9.10266
Trial 1	1.3	Rep	M	0:00:06.916-0:00:07.182	BL	0.854418	8	3.20084
Trial 1	1.3	Rep	M	0:00:07.182-0:00:07.448	BL	0.867997	8	3.25173
Trial 1	1.3	Rep	M	0:00:07.448-0:00:07.714	BL	0.529059	8	1.98199
Trial 1	1.3	Rep	M	0:00:07.714-0:00:07.980	BL	0.357421	8	1.33899
Trial 1	1.3	Rep	M	0:00:07.980-0:00:08.246	BL	0.561824	8	2.10474
Trial 1	1.3	Rep	M	0:00:08.246-0:00:08.512	BL	0.405284	8	1.5183
Trial 1	1.3	Rep	M	0:00:08.512-0:00:08.778	BL	0.35715	8	1.33797
Trial 1	1.3	Rep	M	0:00:08.778-0:00:09.044	BL	0.236295	8	0.885226
Trial 1	1.3	Rep	M	0:00:09.044-0:00:09.310	BL	1.62699	8	6.09512
Trial 1	1.3	Rep	M	0:00:09.310-0:00:09.576	BL	1.13172	7	4.84536
Trial 1	1.3	Rep	M	0:00:09.576-0:00:09.842	BL	3.58127	8	13.4164
Trial 1	1.3	Rep	M	0:00:09.842-0:00:10.108	BL	3.416	8	12.7972
Trial 1	1.3	Rep	M	0:00:10.108-0:00:10.374	BL	1.35795	8	5.0872
Trial 1	1.3	Rep	M	0:00:10.374-0:00:10.640	BL	0.60466	8	2.26521
Trial 1	1.3	Rep	M	0:00:10.640-0:00:10.906	BL	0.52581	8	1.96981
Trial 1	1.3	Rep	M	0:00:10.906-0:00:11.172	BL	2.1805	8	8.16873
Trial 1	1.3	Rep	M	0:00:11.172-0:00:11.438	BL	3.55187	8	13.3062
Trial 1	1.3	Rep	M	0:00:11.438-0:00:11.704	BL	3.42414	8	12.8277
Trial 1	1.3	Rep	M	0:00:11.704-0:00:11.970	BL	1.32283	8	4.95566
Trial 1	1.3	Rep	M	0:00:11.970-0:00:12.236	BL	1.42412	8	5.33511
Trial 1	1.3	Rep	M	0:00:12.236-0:00:12.502	BL	0.816108	8	3.05735
Trial 1	1.3	Rep	M	0:00:12.502-0:00:12.768	BL	1.8284	8	6.84965
Trial 1	1.3	Rep	M	0:00:12.768-0:00:13.034	BL	1.30397	8	4.88498
Trial 1	1.3	Rep	M	0:00:13.034-0:00:13.300	BL	2.18368	8	8.18059
Trial 1	1.3	Rep	M	0:00:13.300-0:00:13.566	BL	1.9501	8	7.30553
Trial 1	1.3	Rep	M	0:00:13.566-0:00:13.832	BL	3.49344	8	13.0873
Trial 1	1.3	Rep	M	0:00:13.832-0:00:14.098	BL	3.47716	8	13.0263
Trial 1	1.3	Rep	M	0:00:14.098-0:00:14.364	BL	2.07185	8	7.76165
Trial 1	1.3	Rep	M	0:00:14.364-0:00:14.630	BL	2.23422	8	8.36995
Trial 1	1.3	Rep	M	0:00:14.630-0:00:14.896	BL	2.69411	8	10.0928
Trial 1	1.3	Rep	M	0:00:14.896-0:00:15.162	BL	1.97833	8	7.41132
Trial 1	1.3	Rep	M	0:00:15.162-0:00:15.428	BL	2.13626	8	8.00298
Trial 1	1.3	Rep	M	0:00:15.428-0:00:15.694	BL	0.781156	8	2.92639
Trial 1	1.3	Rep	M	0:00:15.694-0:00:15.960	BL	1.10986	8	4.15784
Trial 1	1.3	Rep	M	0:00:15.960-0:00:16.226	BL	0.560813	8	2.10094
Trial 1	1.3	Rep	M	0:00:16.226-0:00:16.492	BL	0.447135	8	1.67509
Trial 1	1.3	Rep	M	0:00:16.492-0:00:16.758	BL	1.05415	8	3.94911
Trial 1	1.3	Rep	M	0:00:16.758-0:00:17.024	BL	1.16935	8	4.38068
Trial 1	1.3	Rep	M	0:00:17.024-0:00:17.290	BL	4.31922	8	16.1809
Trial 1	1.3	Rep	M	0:00:17.290-0:00:17.556	BL	3.90698	8	14.6365
Trial 1	1.3	Rep	M	0:00:17.556-0:00:17.822	BL	3.45232	8	12.9333
Trial 1	1.3	Rep	M	0:00:17.822-0:00:18.088	BL	3.65982	8	13.7106
Trial 1	1.3	Rep	M	0:00:18.088-0:00:18.354	BL	2.33306	8	8.74023
Trial 1	1.3	Rep	M	0:00:18.354-0:00:18.620	BL	1.31204	8	4.91525
Trial 1	1.3	Rep	M	0:00:18.620-0:00:18.886	BL	1.71992	8	6.44327
Trial 1	1.3	Rep	M	0:00:18.886-0:00:19.152	BL	0.897441	7	3.84233
Trial 1	1.3	Rep	M	0:00:19.152-0:00:19.418	BL	2.19006	8	8.20454
Trial 1	1.3	Rep	M	0:00:19.418-0:00:19.684	BL	1.051	8	3.93731
Trial 1	1.3	Rep	M	0:00:19.684-0:00:19.950	BL	2.42266	8	9.07593
Trial 1	1.3	Rep	M	0:00:19.950-0:00:20.216	BL	2.44708	8	9.16734
Trial 1	1.3	Rep	M	0:00:20.216-0:00:20.482	BL	1.4342	8	5.37286
Trial 1	1.3	Rep	M	0:00:20.482-0:00:20.748	BL	0.642473	8	2.40688
Trial 1	1.3	Rep	M	0:00:20.748-0:00:21.014	BL	0.887795	8	3.3259
Trial 1	1.3	Rep	M	0:00:21.014-0:00:21.280	BL	1.94674	8	7.29301
Trial 1	1.3	Rep	M	0:00:21.280-0:00:21.546	BL	1.23104	8	4.61177
Trial 1	1.3	Rep	M	0:00:21.546-0:00:21.812	BL	1.62564	8	6.09005
Trial 1	1.3	Rep	M	0:00:21.812-0:00:22.078	BL	1.34752	8	5.04815
Trial 1	1.3	Rep	M	0:00:22.078-0:00:22.344	BL	0.756928	8	2.83563
Trial 1	1.3	Rep	M	0:00:22.344-0:00:22.610	BL	2.06329	8	7.72962
Trial 1	1.3	Rep	M	0:00:22.610-0:00:22.876	BL	1.45256	8	5.44165
Trial 1	1.3	Rep	M	0:00:22.876-0:00:23.142	BL	3.52619	8	13.21
Trial 1	1.3	Rep	M	0:00:23.142-0:00:23.408	BL	2.27111	8	8.50814
Trial 1	1.3	Rep	M	0:00:23.408-0:00:23.674	BL	2.06666	8	7.7422
Trial 1	1.3	Rep	M	0:00:23.674-0:00:23.940	BL	2.65144	8	9.93298
Trial 1	1.3	Rep	M	0:00:23.940-0:00:24.206	BL	2.91851	8	10.9334
Trial 1	1.3	Rep	M	0:00:24.206-0:00:24.472	BL	1.00163	8	3.75236
Trial 1	1.3	Rep	M	0:00:24.472-0:00:24.738	BL	0.684675	8	2.56498
Trial 1	1.3	Rep	M	0:00:24.738-0:00:25.004	BL	1.3112	8	4.91206
Trial 1	1.3	Rep	M	0:00:25.004-0:00:25.270	BL	0.788996	8	2.95579
Trial 1	1.3	Rep	M	0:00:25.270-0:00:25.536	BL	2.62738	8	9.84283
Trial 1	1.3	Rep	M	0:00:25.536-0:00:25.802	BL	1.28482	8	4.81324
Trial 1	1.3	Rep	M	0:00:25.802-0:00:26.068	BL	0.526116	8	1.97097
Trial 1	1.3	Rep	M	0:00:26.068-0:00:26.334	BL	1.21037	8	4.53439
Trial 1	1.3	Rep	M	0:00:26.334-0:00:26.600	BL	0.724287	8	2.71337
Trial 1	1.3	Rep	M	0:00:26.600-0:00:26.866	BL	1.26161	8	4.7263
Trial 1	1.3	Rep	M	0:00:26.866-0:00:27.132	BL	1.69589	8	6.35321
Trial 1	1.3	Rep	M	0:00:27.132-0:00:27.398	BL	0.279879	8	1.0485
Trial 1	1.3	Rep	M	0:00:27.398-0:00:27.664	BL	3.12342	8	11.7011
Trial 1	1.3	Rep	M	0:00:27.664-0:00:27.930	BL	2.91843	8	10.9332
Trial 1	1.3	Rep	M	0:00:27.930-0:00:28.196	BL	2.71158	8	10.1582
Trial 1	1.3	Rep	M	0:00:28.196-0:00:28.462	BL	0.915522	8	3.42976
Trial 1	1.3	Rep	M	0:00:28.462-0:00:28.728	BL	0.692697	7	2.96572
Trial 1	1.3	Rep	M	0:00:28.728-0:00:28.994	BL	0.786807	8	2.94759
Trial 1	1.3	Rep	M	0:00:28.994-0:00:29.260	BL	0.5911	8	2.21441
Trial 1	1.3	Rep	M	0:00:29.260-0:00:29.526	BL	0.499539	8	1.8714
Trial 1	1.3	Rep	M	0:00:29.526-0:00:29.792	BL	0.511686	8	1.9169
Trial 1	1.3	Rep	M	0:00:29.792-0:00:30.058	BL	0.670229	8	2.51084
Trial 1	1.3	Rep	M	0:00:30.058-0:00:30.324	BL	1.07272	8	4.01869
Trial 1	1.3	Rep	M	0:00:30.324-0:00:30.590	BL	0.889589	8	3.33262
Trial 1	1.3	Rep	M	0:00:30.590-0:00:30.856	BL	0.961634	8	3.60253
Trial 1	1.3	Rep	M	0:00:30.856-0:00:31.122	BL	0.698562	8	2.61698
Trial 1	1.3	Rep	M	0:00:31.122-0:00:31.388	BL	1.09675	8	4.10868
Trial 1	1.3	Rep	M	0:00:31.388-0:00:31.654	BL	2.09601	8	7.85219
Trial 1	1.3	Rep	M	0:00:31.654-0:00:31.920	BL	2.51026	8	9.40405
Trial 1	1.3	Rep	M	0:00:31.920-0:00:32.186	BL	3.44295	8	12.8982
Trial 1	1.3	Rep	M	0:00:32.186-0:00:32.452	BL	0.71559	8	2.68077
Trial 1	1.3	Rep	M	0:00:32.452-0:00:32.718	BL	0.264351	8	0.990328
Trial 1	1.3	Rep	M	0:00:32.718-0:00:32.984	BL	0.219452	8	0.822127
Trial 1	1.3	Rep	M	0:00:32.984-0:00:33.250	BL	0.439576	8	1.64676
Trial 1	1.3	Rep	M	0:00:33.250-0:00:33.516	BL	1.07083	8	4.0116
Trial 1	1.3	Rep	M	0:00:33.516-0:00:33.782	BL	0.683004	8	2.5587
Trial 1	1.3	Rep	M	0:00:33.782-0:00:34.048	BL	0.225301	8	0.844032
Trial 1	1.3	Rep	M	0:00:34.048-0:00:34.314	BL	0.611203	8	2.28972
Trial 1	1.3	Rep	M	0:00:34.314-0:00:34.580	BL	2.14707	8	8.04346
Trial 1	1.3	Rep	M	0:00:34.580-0:00:34.846	BL	0.744964	8	2.79084
Trial 1	1.3	Rep	M	0:00:34.846-0:00:35.112	BL	0.925155	8	3.46586
Trial 1	1.3	Rep	M	0:00:35.112-0:00:35.378	BL	0.842051	8	3.15452
Trial 1	1.3	Rep	M	0:00:35.378-0:00:35.644	BL	0.95218	8	3.56712
Trial 1	1.3	Rep	M	0:00:35.644-0:00:35.910	BL	1.37723	8	5.15945
Trial 1	1.3	Rep	M	0:00:35.910-0:00:36.176	BL	3.27517	8	12.2696
Trial 1	1.3	Rep	M	0:00:36.176-0:00:36.442	BL	1.28619	8	4.81835
Trial 1	1.3	Rep	M	0:00:36.442-0:00:36.708	BL	0.226362	8	0.84801
Trial 1	1.3	Rep	M	0:00:36.708-0:00:36.974	BL	0.320886	8	1.20212
Trial 1	1.3	Rep	M	0:00:36.974-0:00:37.240	BL	0.827097	8	3.09852
Trial 1	1.3	Rep	M	0:00:37.240-0:00:37.506	BL	0.829273	8	3.10669
Trial 1	1.3	Rep	M	0:00:37.506-0:00:37.772	BL	1.53904	8	5.76564
Trial 1	1.3	Rep	M	0:00:37.772-0:00:38.038	BL	0.776251	7	3.32345
Trial 1	1.3	Rep	M	0:00:38.038-0:00:38.304	BL	1.62975	8	6.10546
Trial 1	1.3	Rep	M	0:00:38.304-0:00:38.570	BL	3.65722	8	13.7008
Trial 1	1.3	Rep	M	0:00:38.570-0:00:38.836	BL	1.2248	8	4.58839
Trial 1	1.3	Rep	M	0:00:38.836-0:00:39.102	BL	0.638941	8	2.39365
Trial 1	1.3	Rep	M	0:00:39.102-0:00:39.368	BL	1.98028	8	7.4186
Trial 1	1.3	Rep	M	0:00:39.368-0:00:39.634	BL	5.23575	8	19.6145
Trial 1	1.3	Rep	M	0:00:39.634-0:00:39.900	BL	4.61929	8	17.305
Trial 1	1.3	Rep	M	0:00:39.900-0:00:40.166	BL	2.89401	8	10.8417
Trial 1	1.3	Rep	M	0:00:40.166-0:00:40.432	BL	3.00917	8	11.2731
Trial 1	1.3	Rep	M	0:00:40.432-0:00:40.698	BL	2.92078	8	10.942
Trial 1	1.3	Rep	M	0:00:40.698-0:00:40.964	BL	2.32765	8	8.71995
Trial 1	1.3	Rep	M	0:00:40.964-0:00:41.230	BL	2.00656	8	7.51709
Trial 1	1.3	Rep	M	0:00:41.230-0:00:41.496	BL	2.64147	8	9.89557
Trial 1	1.3	Rep	M	0:00:41.496-0:00:41.762	BL	1.04799	8	3.92606
Trial 1	1.3	Rep	M	0:00:41.762-0:00:42.028	BL	1.66758	8	6.24714
Trial 1	1.3	Rep	M	0:00:42.028-0:00:42.294	BL	3.05044	8	11.4277
Trial 1	1.3	Rep	M	0:00:42.294-0:00:42.560	BL	1.33248	8	4.99178
Trial 1	1.3	Rep	M	0:00:42.560-0:00:42.826	BL	0.791048	8	2.96347
Trial 1	1.3	Rep	M	0:00:42.826-0:00:43.092	BL	1.82204	8	6.82583
Trial 1	1.3	Rep	M	0:00:43.092-0:00:43.358	BL	2.37354	8	8.89185
Trial 1	1.3	Rep	M	0:00:43.358-0:00:43.624	BL	1.37118	8	5.13678
Trial 1	1.3	Rep	M	0:00:43.624-0:00:43.890	BL	0.646329	8	2.4213
Trial 1	1.3	Rep	M	0:00:43.890-0:00:44.156	BL	0.779052	8	2.91851
Trial 1	1.3	Rep	M	0:00:44.156-0:00:44.422	BL	0.466144	8	1.7463
Trial 1	1.3	Rep	M	0:00:44.422-0:00:44.688	BL	2.68946	8	10.0754
Trial 1	1.3	Rep	M	0:00:44.688-0:00:44.954	BL	2.65404	8	9.94271
Trial 1	1.3	Rep	M	0:00:44.954-0:00:45.220	BL	3.59005	8	13.4492
Trial 1	1.3	Rep	M	0:00:45.220-0:00:45.486	BL	5.34011	8	20.0054
Trial 1	1.3	Rep	M	0:00:45.486-0:00:45.752	BL	3.77005	8	14.1236
Trial 1	1.3	Rep	M	0:00:45.752-0:00:46.018	BL	0.401056	8	1.50245
Trial 1	1.3	Rep	M	0:00:46.018-0:00:46.284	BL	1.13732	8	4.26069
Trial 1	1.3	Rep	M	0:00:46.284-0:00:46.550	BL	1.1889	8	4.45389
Trial 1	1.3	Rep	M	0:00:46.550-0:00:46.816	BL	1.31336	8	4.92019
Trial 1	1.3	Rep	M	0:00:46.816-0:00:47.082	BL	0.963685	8	3.61019
Trial 1	1.3	Rep	M	0:00:47.082-0:00:47.348	BL	0.853026	8	3.19564
Trial 1	1.3	Rep	M	0:00:47.348-0:00:47.614	BL	1.68973	7	7.23446
Trial 1	1.3	Rep	M	0:00:47.614-0:00:47.880	BL	1.4276	8	5.34818
Trial 1	1.3	Rep	M	0:00:47.880-0:00:48.146	BL	1.13107	8	4.23728
Trial 1	1.3	Rep	M	0:00:48.146-0:00:48.412	BL	1.91896	8	7.18889
Trial 1	1.3	Rep	M	0:00:48.412-0:00:48.678	BL	1.23515	8	4.62722
Trial 1	1.3	Rep	M	0:00:48.678-0:00:48.944	BL	0.761558	8	2.85298
Trial 1	1.3	Rep	M	0:00:48.944-0:00:49.210	BL	1.8278	8	6.84744
Trial 1	1.3	Rep	M	0:00:49.210-0:00:49.476	BL	1.83049	8	6.8575
Trial 1	1.3	Rep	M	0:00:49.476-0:00:49.742	BL	1.41616	8	5.30528
Trial 1	1.3	Rep	M	0:00:49.742-0:00:50.008	BL	1.85986	8	6.96751
Trial 1	1.3	Rep	M	0:00:50.008-0:00:50.274	BL	0.806277	8	3.02051
Trial 1	1.3	Rep	M	0:00:50.274-0:00:50.540	BL	0.576689	8	2.16043
Trial 1	1.3	Rep	M	0:00:50.540-0:00:50.806	BL	1.12558	8	4.21669
Trial 1	1.3	Rep	M	0:00:50.806-0:00:51.072	BL	0.971696	8	3.64022
Trial 1	1.3	Rep	M	0:00:51.072-0:00:51.338	BL	0.904935	8	3.39012
Trial 1	1.3	Rep	M	0:00:51.338-0:00:51.604	BL	1.14312	8	4.28239
Trial 1	1.3	Rep	M	0:00:51.604-0:00:51.870	BL	1.39225	8	5.21573
Trial 1	1.3	Rep	M	0:00:51.870-0:00:52.136	BL	0.412312	8	1.54462
Trial 1	1.3	Rep	M	0:00:52.136-0:00:52.402	BL	0.397691	8	1.48985
Trial 1	1.3	Rep	M	0:00:52.402-0:00:52.668	BL	0.178043	8	0.666994
Trial 1	1.3	Rep	M	0:00:52.668-0:00:52.934	BL	0.206701	8	0.774354
Trial 1	1.3	Rep	M	0:00:52.934-0:00:53.200	BL	0.237392	8	0.889333
Trial 1	1.3	Rep	M	0:00:53.200-0:00:53.466	BL	0.238943	8	0.895136
Trial 1	1.3	Rep	M	0:00:53.466-0:00:53.732	BL	0.322722	8	1.209
Trial 1	1.3	Rep	M	0:00:53.732-0:00:53.998	BL	0.423402	8	1.58617
Trial 1	1.3	Rep	M	0:00:53.998-0:00:54.264	BL	0.70281	8	2.63291
Trial 1	1.3	Rep	M	0:00:54.264-0:00:54.530	BL	0.735609	8	2.75578
Trial 1	1.3	Rep	M	0:00:54.530-0:00:54.796	BL	0.322536	8	1.20831
Trial 1	1.3	Rep	M	0:00:54.796-0:00:55.062	BL	1.08835	8	4.07719
Trial 1	1.3	Rep	M	0:00:55.062-0:00:55.328	BL	1.72164	8	6.4497
Trial 1	1.3	Rep	M	0:00:55.328-0:00:55.594	BL	3.80874	8	14.2685
Trial 1	1.3	Rep	M	0:00:55.594-0:00:55.860	BL	4.20258	8	15.744
Trial 1	1.3	Rep	M	0:00:55.860-0:00:56.126	BL	3.64535	8	13.6564
Trial 1	1.3	Rep	M	0:00:56.126-0:00:56.392	BL	1.77967	8	6.66705
Trial 1	1.3	Rep	M	0:00:56.392-0:00:56.658	BL	3.40625	8	12.7607
Trial 1	1.3	Rep	M	0:00:56.658-0:00:56.924	BL	1.94742	8	7.29549
Trial 1	1.3	Rep	M	0:00:56.924-0:00:57.190	BL	3.79633	7	16.2537
Trial 1	1.3	Rep	M	0:00:57.190-0:00:57.456	BL	1.80478	8	6.76117
Trial 1	1.3	Rep	M	0:00:57.456-0:00:57.722	BL	1.39787	8	5.23675
Trial 1	1.3	Rep	M	0:00:57.722-0:00:57.988	BL	0.832249	8	3.11783
Trial 1	1.3	Rep	M	0:00:57.988-0:00:58.254	BL	0.992457	8	3.71798
Trial 1	1.3	Rep	M	0:00:58.254-0:00:58.520	BL	0.560507	8	2.09979
Trial 1	1.3	Rep	M	0:00:58.520-0:00:58.786	BL	0.748019	8	2.80227
Trial 1	1.3	Rep	M	0:00:58.786-0:00:59.052	BL	0.302879	8	1.13466
Trial 1	1.3	Rep	M	0:00:59.052-0:00:59.318	BL	0.402406	8	1.50753
Trial 1	1.3	Rep	M	0:00:59.318-0:00:59.584	BL	0.413992	8	1.55092
Trial 1	1.3	Rep	M	0:00:59.584-0:00:59.850	BL	0.242001	8	0.906594
Trial 1	1.3	Rep	M	0:00:59.850-0:01:00.116	BL	0.484748	8	1.81599
Trial 1	1.3	Rep	M	0:01:00.116-0:01:00.382	BL	0.445267	8	1.66808
Trial 1	1.3	Rep	M	0:01:00.382-0:01:00.648	BL	0.221914	8	0.831342
Trial 1	1.3	Rep	M	0:01:00.648-0:01:00.914	BL	0.106262	8	0.398082
Trial 1	1.3	Rep	M	0:01:00.914-0:01:01.180	BL	0.184354	8	0.690636
Trial 1	1.3	Rep	M	0:01:01.180-0:01:01.446	BL	0.143071	8	0.535979
Trial 1	1.3	Rep	M	0:01:01.446-0:01:01.712	BL	0.510187	8	1.91129
Trial 1	1.3	Rep	M	0:01:01.712-0:01:01.978	BL	1.08681	8	4.07146
Trial 1	1.3	Rep	M	0:01:01.978-0:01:02.244	BL	1.64844	8	6.17543
Trial 1	1.3	Rep	M	0:01:02.244-0:01:02.510	BL	2.08748	8	7.82019
Trial 1	1.3	Rep	M	0:01:02.510-0:01:02.776	BL	1.86344	8	6.98094
Trial 1	1.3	Rep	M	0:01:02.776-0:01:03.042	BL	2.17653	8	8.15382
Trial 1	1.3	Rep	M	0:01:03.042-0:01:03.308	BL	1.69608	8	6.35397
Trial 1	1.3	Rep	M	0:01:03.308-0:01:03.574	BL	2.59355	8	9.71608
Trial 1	1.3	Rep	M	0:01:03.574-0:01:03.840	BL	2.84122	8	10.6439
Trial 1	1.3	Rep	M	0:01:03.840-0:01:04.106	BL	3.20803	8	12.0181
Trial 1	1.3	Rep	M	0:01:04.106-0:01:04.372	BL	3.57598	8	13.3965
Trial 1	1.3	Rep	M	0:01:04.372-0:01:04.638	BL	1.72469	8	6.46113
Trial 1	1.3	Rep	M	0:01:04.638-0:01:04.904	BL	0.345751	8	1.29527
Trial 1	1.3	Rep	M	0:01:04.904-0:01:05.170	BL	1.1101	8	4.15869
Trial 1	1.3	Rep	M	0:01:05.170-0:01:05.436	BL	2.18478	8	8.18473
Trial 1	1.3	Rep	M	0:01:05.436-0:01:05.702	BL	1.57625	8	5.905
Trial 1	1.3	Rep	M	0:01:05.702-0:01:05.968	BL	0.507322	8	1.90056
Trial 1	1.3	Rep	M	0:01:05.968-0:01:06.234	BL	0.685333	8	2.56742
Trial 1	1.3	Rep	M	0:01:06.234-0:01:06.500	BL	0.664172	8	2.48815
Trial 1	1.3	Rep	M	0:01:06.500-0:01:06.766	BL	0.849638	7	3.63764
Trial 1	1.3	Rep	M	0:01:06.766-0:01:07.032	BL	0.856717	8	3.20949
Trial 1	1.3	Rep	M	0:01:07.032-0:01:07.298	BL	1.54918	8	5.80359
Trial 1	1.3	Rep	M	0:01:07.298-0:01:07.564	BL	1.39343	8	5.22008
Trial 1	1.3	Rep	M	0:01:07.564-0:01:07.830	BL	0.743403	8	2.78497
Trial 1	1.3	Rep	M	0:01:07.830-0:01:08.096	BL	1.07488	8	4.02675
Trial 1	1.3	Rep	M	0:01:08.096-0:01:08.362	BL	1.05531	8	3.95347
Trial 1	1.3	Rep	M	0:01:08.362-0:01:08.628	BL	0.871773	8	3.26587
Trial 1	1.3	Rep	M	0:01:08.628-0:01:08.894	BL	1.89314	8	7.09219
Trial 1	1.3	Rep	M	0:01:08.894-0:01:09.160	BL	3.55606	8	13.3218
Trial 1	1.3	Rep	M	0:01:09.160-0:01:09.426	BL	4.57062	8	17.1227
Trial 1	1.3	Rep	M	0:01:09.426-0:01:09.692	BL	4.77425	8	17.8856
Trial 1	1.3	Rep	M	0:01:09.692-0:01:09.958	BL	3.69294	8	13.8347
Trial 1	1.3	Rep	M	0:01:09.958-0:01:10.224	BL	4.07988	8	15.2843
Trial 1	1.3	Rep	M	0:01:10.224-0:01:10.490	BL	3.4489	8	12.9204
Trial 1	1.3	Rep	M	0:01:10.490-0:01:10.756	BL	2.42535	8	9.08597
Trial 1	1.3	Rep	M	0:01:10.756-0:01:11.022	BL	1.06833	8	4.00225
Trial 1	1.3	Rep	M	0:01:11.022-0:01:11.288	BL	0.241265	8	0.903834
Trial 1	1.3	Rep	M	0:01:11.288-0:01:11.554	BL	0.509945	8	1.91039
Trial 1	1.3	Rep	M	0:01:11.554-0:01:11.820	BL	0.879406	8	3.29447
Trial 1	1.3	Rep	M	0:01:11.820-0:01:12.086	BL	0.713113	8	2.67149
Trial 1	1.3	Rep	M	0:01:12.086-0:01:12.352	BL	1.93957	8	7.26611
Trial 1	1.3	Rep	M	0:01:12.352-0:01:12.618	BL	1.72543	8	6.46388
Trial 1	1.3	Rep	M	0:01:12.618-0:01:12.884	BL	2.31935	8	8.68887
Trial 1	1.3	Rep	M	0:01:12.884-0:01:13.150	BL	0.841062	8	3.15082
Trial 1	1.3	Rep	M	0:01:13.150-0:01:13.416	BL	0.439291	8	1.64569
Trial 1	1.3	Rep	M	0:01:13.416-0:01:13.682	BL	3.01867	8	11.3087
Trial 1	1.3	Rep	M	0:01:13.682-0:01:13.948	BL	2.00461	8	7.50976
Trial 1	1.3	Rep	M	0:01:13.948-0:01:14.214	BL	1.42547	8	5.34019
Trial 1	1.3	Rep	M	0:01:14.214-0:01:14.480	BL	2.24248	8	8.40089
Trial 1	1.3	Rep	M	0:01:14.480-0:01:14.746	BL	2.84589	8	10.6614
Trial 1	1.3	Rep	M	0:01:14.746-0:01:15.012	BL	3.36612	8	12.6103
Trial 1	1.3	Rep	M	0:01:15.012-0:01:15.278	BL	2.46875	8	9.24855
Trial 1	1.3	Rep	M	0:01:15.278-0:01:15.544	BL	2.28921	8	8.57598
Trial 1	1.3	Rep	M	0:01:15.544-0:01:15.810	BL	2.10936	8	7.90217
Trial 1	1.3	Rep	M	0:01:15.810-0:01:16.076	BL	0.874634	7	3.74468
Trial 1	1.3	Rep	M	0:01:16.076-0:01:16.342	BL	0.635384	8	2.38031
Trial 1	1.3	Rep	M	0:01:16.342-0:01:16.608	BL	0.312559	8	1.17092
Trial 1	1.3	Rep	M	0:01:16.608-0:01:16.874	BL	0.332241	8	1.24466
Trial 1	1.3	Rep	M	0:01:16.874-0:01:17.140	BL	0.170733	8	0.639611
Trial 1	1.3	Rep	M	0:01:17.140-0:01:17.406	BL	0.327805	8	1.22803
Trial 1	1.3	Rep	M	0:01:17.406-0:01:17.672	BL	0.484049	8	1.81337
Trial 1	1.3	Rep	M	0:01:17.672-0:01:17.938	BL	0.272871	8	1.02224
Trial 1	1.3	Rep	M	0:01:17.938-0:01:18.204	BL	1.11399	8	4.17326
Trial 1	1.3	Rep	M	0:01:18.204-0:01:18.470	BL	0.897176	8	3.36106
Trial 1	1.3	Rep	M	0:01:18.470-0:01:18.736	BL	1.06399	8	3.98596
Trial 1	1.3	Rep	M	0:01:18.736-0:01:19.002	BL	1.23837	8	4.63927
Trial 1	1.3	Rep	M	0:01:19.002-0:01:19.268	BL	1.81909	8	6.81475
Trial 1	1.3	Rep	M	0:01:19.268-0:01:19.534	BL	0.962597	8	3.60613
Trial 1	1.3	Rep	M	0:01:19.534-0:01:19.800	BL	0.43855	8	1.64292
Trial 1	1.3	Rep	M	0:01:19.800-0:01:20.066	BL	0.932072	8	3.49177
Trial 1	1.3	Rep	M	0:01:20.066-0:01:20.332	BL	1.10598	8	4.14327
Trial 1	1.3	Rep	M	0:01:20.332-0:01:20.598	BL	1.65916	8	6.21564
Trial 1	1.3	Rep	M	0:01:20.598-0:01:20.864	BL	4.07181	8	15.254
Trial 1	1.3	Rep	M	0:01:20.864-0:01:21.130	BL	4.24498	8	15.9028
Trial 1	1.3	Rep	M	0:01:21.130-0:01:21.396	BL	2.6522	8	9.93579
Trial 1	1.3	Rep	M	0:01:21.396-0:01:21.662	BL	1.17147	8	4.38863
Trial 1	1.3	Rep	M	0:01:21.662-0:01:21.928	BL	1.51885	8	5.69
Trial 1	1.3	Rep	M	0:01:21.928-0:01:22.194	BL	1.51082	8	5.65989
Trial 1	1.3	Rep	M	0:01:22.194-0:01:22.460	BL	2.31307	8	8.66536
Trial 1	1.3	Rep	M	0:01:22.460-0:01:22.726	BL	2.74233	8	10.2734
Trial 1	1.3	Rep	M	0:01:22.726-0:01:22.992	BL	1.06493	8	3.9895
Trial 1	1.3	Rep	M	0:01:22.992-0:01:23.258	BL	1.4212	8	5.32417
Trial 1	1.3	Rep	M	0:01:23.258-0:01:23.524	BL	1.82996	8	6.85549
Trial 1	1.3	Rep	M	0:01:23.524-0:01:23.790	BL	0.8278	8	3.10115
Trial 1	1.3	Rep	M	0:01:23.790-0:01:24.056	BL	0.183172	8	0.686203
Trial 1	1.3	Rep	M	0:01:24.056-0:01:24.322	BL	0.501694	8	1.87948
Trial 1	1.3	Rep	M	0:01:24.322-0:01:24.588	BL	0.935807	8	3.50576
Trial 1	1.3	Rep	M	0:01:24.588-0:01:24.854	BL	1.48457	8	5.5616
Trial 1	1.3	Rep	M	0:01:24.854-0:01:25.120	BL	2.72063	8	10.1922
Trial 1	1.3	Rep	M	0:01:25.120-0:01:25.386	BL	1.35706	8	5.08386
Trial 1	1.3	Rep	M	0:01:25.386-0:01:25.652	BL	2.37847	7	10.1832
Trial 1	1.3	Rep	M	0:01:25.652-0:01:25.918	BL	2.87987	8	10.7887
Trial 1	1.3	Rep	M	0:01:25.918-0:01:26.184	BL	3.84839	8	14.417
Trial 1	1.3	Rep	M	0:01:26.184-0:01:26.450	BL	3.67119	8	13.7532
Trial 1	1.3	Rep	M	0:01:26.450-0:01:26.716	BL	2.76194	8	10.3469
Trial 1	1.3	Rep	M	0:01:26.716-0:01:26.982	BL	1.78175	8	6.67488
Trial 1	1.3	Rep	M	0:01:26.982-0:01:27.248	BL	1.75369	8	6.5698
Trial 1	1.3	Rep	M	0:01:27.248-0:01:27.514	BL	2.56882	8	9.62342
Trial 1	1.3	Rep	M	0:01:27.514-0:01:27.780	BL	0.968295	8	3.62748
Trial 1	1.3	Rep	M	0:01:27.780-0:01:28.046	BL	1.67769	8	6.2851
Trial 1	1.3	Rep	M	0:01:28.046-0:01:28.312	BL	0.88107	8	3.30071
Trial 1	1.3	Rep	M	0:01:28.312-0:01:28.578	BL	0.367211	8	1.37567
Trial 1	1.3	Rep	M	0:01:28.578-0:01:28.844	BL	1.40617	8	5.26785
Trial 1	1.3	Rep	M	0:01:28.844-0:01:29.110	BL	3.5971	8	13.4756
Trial 1	1.3	Rep	M	0:01:29.110-0:01:29.376	BL	2.49414	8	9.3437
Trial 1	1.3	Rep	M	0:01:29.376-0:01:29.642	BL	0.550451	8	2.06212
Trial 1	1.3	Rep	M	0:01:29.642-0:01:29.908	BL	0.995178	8	3.72819
Trial 1	1.3	Rep	M	0:01:29.908-0:01:30.174	BL	1.83651	8	6.88001
Trial 1	1.3	Rep	M	0:01:30.174-0:01:30.440	BL	2.17995	8	8.16662
Trial 1	1.3	Rep	M	0:01:30.440-0:01:30.706	BL	0.196467	8	0.736017
Trial 1	1.3	Rep	M	0:01:30.706-0:01:30.972	BL	1.09974	8	4.1199
Trial 1	1.3	Rep	M	0:01:30.972-0:01:31.238	BL	0.679007	8	2.54374
Trial 1	1.3	Rep	M	0:01:31.238-0:01:31.504	BL	0.318723	8	1.19401
Trial 1	1.3	Rep	M	0:01:31.504-0:01:31.770	BL	0.481698	8	1.80456
Trial 1	1.3	Rep	M	0:01:31.770-0:01:32.036	BL	0.428259	8	1.60437
Trial 1	1.3	Rep	M	0:01:32.036-0:01:32.302	BL	0.78546	8	2.94253
Trial 1	1.3	Rep	M	0:01:32.302-0:01:32.568	BL	1.6106	8	6.03372
Trial 1	1.3	Rep	M	0:01:32.568-0:01:32.834	BL	3.36261	8	12.5972
Trial 1	1.3	Rep	M	0:01:32.834-0:01:33.100	BL	1.924	8	7.20778
Trial 1	1.3	Rep	M	0:01:33.100-0:01:33.366	BL	0.395583	8	1.48196
Trial 1	1.3	Rep	M	0:01:33.366-0:01:33.632	BL	0.767223	8	2.8742
Trial 1	1.3	Rep	M	0:01:33.632-0:01:33.898	BL	0.306012	8	1.1464
Trial 1	1.3	Rep	M	0:01:33.898-0:01:34.164	BL	0.32995	8	1.23607
Trial 1	1.3	Rep	M	0:01:34.164-0:01:34.430	BL	1.14688	8	4.29649
Trial 1	1.3	Rep	M	0:01:34.430-0:01:34.696	BL	2.90865	8	10.8966
Trial 1	1.3	Rep	M	0:01:34.696-0:01:34.962	BL	2.35115	8	8.808
Trial 1	1.3	Rep	M	0:01:34.962-0:01:35.228	BL	1.42647	7	6.10734
Trial 1	1.3	Rep	M	0:01:35.228-0:01:35.494	BL	1.12339	8	4.20851
Trial 1	1.3	Rep	M	0:01:35.494-0:01:35.760	BL	1.58115	8	5.92337
Trial 1	1.3	Rep	M	0:01:35.760-0:01:36.026	BL	1.35731	8	5.08482
Trial 1	1.3	Rep	M	0:01:36.026-0:01:36.292	BL	0.347718	8	1.30263
Trial 1	1.3	Rep	M	0:01:36.292-0:01:36.558	BL	2.07668	8	7.77976
Trial 1	1.3	Rep	M	0:01:36.558-0:01:36.824	BL	3.26134	8	12.2178
Trial 1	1.3	Rep	M	0:01:36.824-0:01:37.090	BL	4.15299	8	15.5581
Trial 1	1.3	Rep	M	0:01:37.090-0:01:37.356	BL	3.74388	8	14.0255
Trial 1	1.3	Rep	M	0:01:37.356-0:01:37.622	BL	2.36767	8	8.86985
Trial 1	1.3	Rep	M	0:01:37.622-0:01:37.888	BL	2.21839	8	8.31063
Trial 1	1.3	Rep	M	0:01:37.888-0:01:38.154	BL	1.33108	8	4.98658
Trial 1	1.3	Rep	M	0:01:38.154-0:01:38.420	BL	1.0591	8	3.96765
Trial 1	1.3	Rep	M	0:01:38.420-0:01:38.686	BL	1.2285	8	4.6023
Trial 1	1.3	Rep	M	0:01:38.686-0:01:38.952	BL	2.15061	8	8.05668
Trial 1	1.3	Rep	M	0:01:38.952-0:01:39.218	BL	1.37022	8	5.13319
Trial 1	1.3	Rep	M	0:01:39.218-0:01:39.484	BL	1.35214	8	5.06545
Trial 1	1.3	Rep	M	0:01:39.484-0:01:39.750	BL	1.35599	8	5.07986
Trial 1	1.3	Rep	M	0:01:39.750-0:01:40.016	BL	0.866744	8	3.24707
Trial 1	1.3	Rep	M	0:01:40.016-0:01:40.282	BL	2.77432	8	10.3933
Trial 1	1.3	Rep	M	0:01:40.282-0:01:40.548	BL	2.44639	8	9.16479
Trial 1	1.3	Rep	M	0:01:40.548-0:01:40.814	BL	0.919458	8	3.44453
Trial 1	1.3	Rep	M	0:01:40.814-0:01:41.080	BL	1.52111	8	5.69844
Trial 1	1.3	Rep	M	0:01:41.080-0:01:41.346	BL	3.18186	8	11.9201
Trial 1	1.3	Rep	M	0:01:41.346-0:01:41.612	BL	1.8345	8	6.87249
Trial 1	1.3	Rep	M	0:01:41.612-0:01:41.878	BL	0.652898	8	2.44592
Trial 1	1.3	Rep	M	0:01:41.878-0:01:42.144	BL	0.537391	8	2.0132
Trial 1	1.3	Rep	M	0:01:42.144-0:01:42.410	BL	0.813551	8	3.04774
Trial 1	1.3	Rep	M	0:01:42.410-0:01:42.676	BL	0.423734	8	1.58741
Trial 1	1.3	Rep	M	0:01:42.676-0:01:42.942	BL	0.575079	8	2.15439
Trial 1	1.3	Rep	M	0:01:42.942-0:01:43.208	BL	1.69828	8	6.36218
Trial 1	1.3	Rep	M	0:01:43.208-0:01:43.474	BL	3.05777	8	11.4552
Trial 1	1.3	Rep	M	0:01:43.474-0:01:43.740	BL	1.79346	8	6.71873
Trial 1	1.3	Rep	M	0:01:43.740-0:01:44.006	BL	0.716105	8	2.68272
Trial 1	1.3	Rep	M	0:01:44.006-0:01:44.272	BL	0.336992	8	1.26246
Trial 1	1.3	Rep	M	0:01:44.272-0:01:44.538	BL	2.30377	8	8.63048
Trial 1	1.3	Rep	M	0:01:44.538-0:01:44.804	BL	2.57564	7	11.0275
Trial 1	1.3	Rep	M	0:01:44.804-0:01:45.070	BL	0.995689	8	3.7301
Trial 1	1.3	Rep	M	0:01:45.070-0:01:45.336	BL	1.14556	8	4.29155
Trial 1	1.3	Rep	M	0:01:45.336-0:01:45.602	BL	2.3154	8	8.67406
Trial 1	1.3	Rep	M	0:01:45.602-0:01:45.868	BL	1.15853	8	4.34013
Trial 1	1.3	Rep	M	0:01:45.868-0:01:46.134	BL	2.65287	8	9.93828
Trial 1	1.3	Rep	M	0:01:46.134-0:01:46.400	BL	2.42955	8	9.10172
Trial 1	1.3	Rep	M	0:01:46.400-0:01:46.666	BL	2.38735	8	8.94359
Trial 1	1.3	Rep	M	0:01:46.666-0:01:46.932	BL	1.914	8	7.17034
Trial 1	1.3	Rep	M	0:01:46.932-0:01:47.198	BL	2.3199	8	8.69092
Trial 1	1.3	Rep	M	0:01:47.198-0:01:47.464	BL	2.33438	8	8.74515
Trial 1	1.3	Rep	M	0:01:47.464-0:01:47.730	BL	2.33633	8	8.75247
Trial 1	1.3	Rep	M	0:01:47.730-0:01:47.996	BL	3.28653	8	12.3121
Trial 1	1.3	Rep	M	0:01:47.996-0:01:48.262	BL	4.17224	8	15.6303
Trial 1	1.3	Rep	M	0:01:48.262-0:01:48.528	BL	1.19898	8	4.49168
Trial 1	1.3	Rep	M	0:01:48.528-0:01:48.794	BL	0.684316	8	2.56361
Trial 1	1.3	Rep	M	0:01:48.794-0:01:49.060	BL	1.70286	8	6.37934
Trial 1	1.3	Rep	M	0:01:49.060-0:01:49.326	BL	1.0742	8	4.0242
Trial 1	1.3	Rep	M	0:01:49.326-0:01:49.592	BL	1.02769	8	3.85
Trial 1	1.3	Rep	M	0:01:49.592-0:01:49.858	BL	0.664013	8	2.48756
Trial 1	1.3	Rep	M	0:01:49.858-0:01:50.124	BL	1.46898	8	5.50312
Trial 1	1.3	Rep	M	0:01:50.124-0:01:50.390	BL	1.52297	8	5.70544
Trial 1	1.3	Rep	M	0:01:50.390-0:01:50.656	BL	0.487493	8	1.82627
Trial 1	1.3	Rep	M	0:01:50.656-0:01:50.922	BL	1.22592	8	4.5926
Trial 1	1.3	Rep	M	0:01:50.922-0:01:51.188	BL	2.46244	8	9.2249
Trial 1	1.3	Rep	M	0:01:51.188-0:01:51.454	BL	1.67279	8	6.26671
Trial 1	1.3	Rep	M	0:01:51.454-0:01:51.720	BL	0.32167	8	1.20506
Trial 1	1.3	Rep	M	0:01:51.720-0:01:51.986	BL	2.33463	8	8.7461
Trial 1	1.3	Rep	M	0:01:51.986-0:01:52.252	BL	2.31476	8	8.67169
Trial 1	1.3	Rep	M	0:01:52.252-0:01:52.518	BL	0.647716	8	2.4265
Trial 1	1.3	Rep	M	0:01:52.518-0:01:52.784	BL	5.19761	8	19.4715
Trial 1	1.3	Rep	M	0:01:52.784-0:01:53.050	BL	7.58988	8	28.4336
Trial 1	1.3	Rep	M	0:01:53.050-0:01:53.316	BL	5.58844	8	20.9357
Trial 1	1.3	Rep	M	0:01:53.316-0:01:53.582	BL	3.71298	8	13.9098
Trial 1	1.3	Rep	M	0:01:53.582-0:01:53.848	BL	1.50269	8	5.62944
Trial 1	1.3	Rep	M	0:01:53.848-0:01:54.114	BL	1.10428	7	4.72789
Trial 1	1.3	Rep	M	0:01:54.114-0:01:54.380	BL	2.07189	8	7.76185
Trial 1	1.3	Rep	M	0:01:54.380-0:01:54.646	BL	0.794242	8	2.97542
Trial 1	1.3	Rep	M	0:01:54.646-0:01:54.912	BL	0.340526	8	1.27569
Trial 1	1.3	Rep	M	0:01:54.912-0:01:55.178	BL	1.36778	8	5.12406
Trial 1	1.3	Rep	M	0:01:55.178-0:01:55.444	BL	1.62759	8	6.09736
Trial 1	1.3	Rep	M	0:01:55.444-0:01:55.710	BL	1.93826	8	7.2612
Trial 1	1.3	Rep	M	0:01:55.710-0:01:55.976	BL	0.578885	8	2.16865
Trial 1	1.3	Rep	M	0:01:55.976-0:01:56.242	BL	0.295602	8	1.1074
Trial 1	1.3	Rep	M	0:01:56.242-0:01:56.508	BL	1.81344	8	6.7936
Trial 1	1.3	Rep	M	0:01:56.508-0:01:56.774	BL	1.01621	8	3.80698
Trial 1	1.3	Rep	M	0:01:56.774-0:01:57.040	BL	1.72223	8	6.45193
Trial 1	1.3	Rep	M	0:01:57.040-0:01:57.306	BL	1.58634	8	5.9428
Trial 1	1.3	Rep	M	0:01:57.306-0:01:57.572	BL	0.758875	8	2.84292
Trial 1	1.3	Rep	M	0:01:57.572-0:01:57.838	BL	1.80219	8	6.75146
Trial 1	1.3	Rep	M	0:01:57.838-0:01:58.104	BL	1.8996	8	7.11636
Trial 1	1.3	Rep	M	0:01:58.104-0:01:58.370	BL	1.62859	8	6.1011
Trial 1	1.3	Rep	M	0:01:58.370-0:01:58.636	BL	0.884577	8	3.31385
Trial 1	1.3	Rep	M	0:01:58.636-0:01:58.902	BL	1.38419	8	5.18551
Trial 1	1.3	Rep	M	0:01:58.902-0:01:59.168	BL	4.1382	8	15.5028
Trial 1	1.3	Rep	M	0:01:59.168-0:01:59.434	BL	3.26856	8	12.2448
Trial 1	1.3	Rep	M	0:01:59.434-0:01:59.700	BL	1.64473	8	6.16156
Trial 1	1.3	Rep	M	0:01:59.700-0:01:59.966	BL	2.48203	8	9.29829
Trial 1	1.3	Rep	M	0:01:59.966-0:02:00.232	BL	1.70146	8	6.37408
Trial 1	1.3	Rep	M	0:02:00.232-0:02:00.498	BL	1.41148	8	5.28775
Trial 1	1.3	Rep	M	0:02:00.498-0:02:00.764	BL	2.91804	8	10.9317
Trial 1	1.3	Rep	M	0:02:00.764-0:02:01.030	BL	2.33712	8	8.75547
Trial 1	1.3	Rep	M	0:02:01.030-0:02:01.296	BL	1.75107	8	6.55995
Trial 1	1.3	Rep	M	0:02:01.296-0:02:01.562	BL	1.03904	8	3.8925
Trial 1	1.3	Rep	M	0:02:01.562-0:02:01.828	BL	0.637167	8	2.387
Trial 1	1.3	Rep	M	0:02:01.828-0:02:02.094	BL	0.398027	8	1.4911
Trial 1	1.3	Rep	M	0:02:02.094-0:02:02.360	BL	0.293164	8	1.09826
Trial 1	1.3	Rep	M	0:02:02.360-0:02:02.626	BL	1.23898	8	4.64152
Trial 1	1.3	Rep	M	0:02:02.626-0:02:02.892	BL	1.67924	8	6.29084
Trial 1	1.3	Rep	M	0:02:02.892-0:02:03.158	BL	0.402338	8	1.50727
Trial 1	1.3	Rep	M	0:02:03.158-0:02:03.424	BL	0.086863	8	0.32541
Trial 1	1.3	Rep	M	0:02:03.424-0:02:03.690	BL	1.65463	7	7.08418
Trial 1	1.3	Rep	M	0:02:03.690-0:02:03.956	BL	2.43924	8	9.13801
Trial 1	1.3	Rep	M	0:02:03.956-0:02:04.222	BL	0.97587	8	3.65585
Trial 1	1.3	Rep	M	0:02:04.222-0:02:04.488	BL	1.47859	8	5.53916
Trial 1	1.3	Rep	M	0:02:04.488-0:02:04.754	BL	0.423613	8	1.58696
Trial 1	1.3	Rep	M	0:02:04.754-0:02:05.020	BL	0.728955	8	2.73085
Trial 1	1.3	Rep	M	0:02:05.020-0:02:05.286	BL	0.81085	8	3.03766
Trial 1	1.3	Rep	M	0:02:05.286-0:02:05.552	BL	0.551091	8	2.06453
Trial 1	1.3	Rep	M	0:02:05.552-0:02:05.818	BL	0.26979	8	1.0107
Trial 1	1.3	Rep	M	0:02:05.818-0:02:06.084	BL	1.73268	8	6.49109
Trial 1	1.3	Rep	M	0:02:06.084-0:02:06.350	BL	0.902502	8	3.38099
Trial 1	1.3	Rep	M	0:02:06.350-0:02:06.616	BL	2.16621	8	8.11519
Trial 1	1.3	Rep	M	0:02:06.616-0:02:06.882	BL	2.79218	8	10.4602
Trial 1	1.3	Rep	M	0:02:06.882-0:02:07.148	BL	0.409401	8	1.53371
Trial 1	1.3	Rep	M	0:02:07.148-0:02:07.414	BL	0.72391	8	2.71196
Trial 1	1.3	Rep	M	0:02:07.414-0:02:07.680	BL	0.346851	8	1.29939
Trial 1	1.3	Rep	M	0:02:07.680-0:02:07.946	BL	0.240644	8	0.901515
Trial 1	1.3	Rep	M	0:02:07.946-0:02:08.212	BL	0.292568	8	1.09603
Trial 1	1.3	Rep	M	0:02:08.212-0:02:08.478	BL	0.170119	8	0.637307
Trial 1	1.3	Rep	M	0:02:08.478-0:02:08.744	BL	0.132776	8	0.497414
Trial 1	1.3	Rep	M	0:02:08.744-0:02:09.010	BL	0.0890091	8	0.333449
Trial 1	1.3	Rep	M	0:02:09.010-0:02:09.276	BL	0.0975988	8	0.365629
Trial 1	1.3	Rep	M	0:02:09.276-0:02:09.542	BL	0.357913	8	1.34083
Trial 1	1.3	Rep	M	0:02:09.542-0:02:09.808	BL	0.825339	8	3.09191
Trial 1	1.3	Rep	M	0:02:09.808-0:02:10.074	BL	1.66025	8	6.21973
Trial 1	1.3	Rep	M	0:02:10.074-0:02:10.340	BL	0.802038	8	3.00463
Trial 1	1.3	Rep	M	0:02:10.340-0:02:10.606	BL	0.22891	8	0.857552
Trial 1	1.3	Rep	M	0:02:10.606-0:02:10.872	BL	0.231326	8	0.866601
Trial 1	1.3	Rep	M	0:02:10.872-0:02:11.138	BL	0.240604	8	0.901367
Trial 1	1.3	Rep	M	0:02:11.138-0:02:11.404	BL	0.179715	8	0.673256
Trial 1	1.3	Rep	M	0:02:11.404-0:02:11.670	BL	0.152089	8	0.569763
Trial 1	1.3	Rep	M	0:02:11.670-0:02:11.936	BL	0.136089	8	0.509824
Trial 1	1.3	Rep	M	0:02:11.936-0:02:12.202	BL	0.256696	8	0.961642
Trial 1	1.3	Rep	M	0:02:12.202-0:02:12.468	BL	0.460438	8	1.72493
Trial 1	1.3	Rep	M	0:02:12.468-0:02:12.734	BL	0.199167	8	0.746131
Trial 1	1.3	Rep	M	0:02:12.734-0:02:13.000	BL	0.190502	8	0.713667
Trial 1	1.3	Rep	M	0:02:13.000-0:02:13.266	BL	0.394105	7	1.68732
Trial 1	1.3	Rep	M	0:02:13.266-0:02:13.532	BL	0.431824	8	1.61772
Trial 1	1.3	Rep	M	0:02:13.532-0:02:13.798	BL	1.13155	8	4.23907
Trial 1	1.3	Rep	M	0:02:13.798-0:02:14.064	BL	0.968087	8	3.6267
Trial 1	1.3	Rep	M	0:02:14.064-0:02:14.330	BL	0.609345	8	2.28276
Trial 1	1.3	Rep	M	0:02:14.330-0:02:14.596	BL	2.32479	8	8.70922
Trial 1	1.3	Rep	M	0:02:14.596-0:02:14.862	BL	0.915722	8	3.43054
Trial 1	1.3	Rep	M	0:02:14.862-0:02:15.128	BL	1.61572	8	6.05286
Trial 1	1.3	Rep	M	0:02:15.128-0:02:15.394	BL	2.55458	8	9.57008
Trial 1	1.3	Rep	M	0:02:15.394-0:02:15.660	BL	1.15989	8	4.34522
Trial 1	1.3	Rep	M	0:02:15.660-0:02:15.926	BL	0.304691	8	1.14144
Trial 1	1.3	Rep	M	0:02:15.926-0:02:16.192	BL	0.702481	8	2.63167
Trial 1	1.3	Rep	M	0:02:16.192-0:02:16.458	BL	0.63106	8	2.3641
Trial 1	1.3	Rep	M	0:02:16.458-0:02:16.724	BL	1.13607	8	4.256
Trial 1	1.3	Rep	M	0:02:16.724-0:02:16.990	BL	1.98717	8	7.44443
Trial 1	1.3	Rep	M	0:02:16.990-0:02:17.256	BL	4.27512	8	16.0156
Trial 1	1.3	Rep	M	0:02:17.256-0:02:17.522	BL	1.37299	8	5.14359
Trial 1	1.3	Rep	M	0:02:17.522-0:02:17.788	BL	1.16505	8	4.36456
Trial 1	1.3	Rep	M	0:02:17.788-0:02:18.054	BL	0.601571	8	2.25365
Trial 1	1.3	Rep	M	0:02:18.054-0:02:18.320	BL	0.599323	8	2.24521
Trial 1	1.3	Rep	M	0:02:18.320-0:02:18.586	BL	1.6299	8	6.10599
Trial 1	1.3	Rep	M	0:02:18.586-0:02:18.852	BL	2.58472	8	9.68302
Trial 1	1.3	Rep	M	0:02:18.852-0:02:19.118	BL	1.69971	8	6.36754
Trial 1	1.3	Rep	M	0:02:19.118-0:02:19.384	BL	0.278541	8	1.04349
Trial 1	1.3	Rep	M	0:02:19.384-0:02:19.650	BL	0.578508	8	2.16723
Trial 1	1.3	Rep	M	0:02:19.650-0:02:19.916	BL	0.475924	8	1.78293
Trial 1	1.3	Rep	M	0:02:19.916-0:02:20.182	BL	1.61741	8	6.05922
Trial 1	1.3	Rep	M	0:02:20.182-0:02:20.448	BL	1.61339	8	6.04417
Trial 1	1.3	Rep	M	0:02:20.448-0:02:20.714	BL	1.20539	8	4.51569
Trial 1	1.3	Rep	M	0:02:20.714-0:02:20.980	BL	0.585624	8	2.19389
Trial 1	1.3	Rep	M	0:02:20.980-0:02:21.246	BL	1.63687	8	6.13212
Trial 1	1.3	Rep	M	0:02:21.246-0:02:21.512	BL	1.36553	8	5.11562
Trial 1	1.3	Rep	M	0:02:21.512-0:02:21.778	BL	0.898396	8	3.36561
Trial 1	1.3	Rep	M	0:02:21.778-0:02:22.044	BL	0.764978	8	2.86581
Trial 1	1.3	Rep	M	0:02:22.044-0:02:22.310	BL	1.78549	8	6.68887
Trial 1	1.3	Rep	M	0:02:22.310-0:02:22.576	BL	2.13993	8	8.01669
Trial 1	1.3	Rep	M	0:02:22.576-0:02:22.842	BL	0.925536	7	3.96263
Trial 1	1.3	Rep	M	0:02:22.842-0:02:23.108	BL	0.456294	8	1.70941
Trial 1	1.3	Rep	M	0:02:23.108-0:02:23.374	BL	1.36529	8	5.1147
Trial 1	1.3	Rep	M	0:02:23.374-0:02:23.640	BL	4.07268	8	15.2573
Trial 1	1.3	Rep	M	0:02:23.640-0:02:23.906	BL	5.22667	8	19.5804
Trial 1	1.3	Rep	M	0:02:23.906-0:02:24.172	BL	4.16966	8	15.6205
Trial 1	1.3	Rep	M	0:02:24.172-0:02:24.438	BL	2.8562	8	10.7
Trial 1	1.3	Rep	M	0:02:24.438-0:02:24.704	BL	3.13708	8	11.7523
Trial 1	1.3	Rep	M	0:02:24.704-0:02:24.970	BL	1.24573	8	4.66683
Trial 1	1.3	Rep	M	0:02:24.970-0:02:25.236	BL	1.34672	8	5.04517
Trial 1	1.3	Rep	M	0:02:25.236-0:02:25.502	BL	4.73679	8	17.7452
Trial 1	1.3	Rep	M	0:02:25.502-0:02:25.768	BL	3.23402	8	12.1155
Trial 1	1.3	Rep	M	0:02:25.768-0:02:26.034	BL	2.28695	8	8.56748
Trial 1	1.3	Rep	M	0:02:26.034-0:02:26.300	BL	3.48847	8	13.0687
Trial 1	1.3	Rep	M	0:02:26.300-0:02:26.566	BL	4.54782	8	17.0373
Trial 1	1.3	Rep	M	0:02:26.566-0:02:26.832	BL	4.09458	8	15.3393
Trial 1	1.3	Rep	M	0:02:26.832-0:02:27.098	BL	1.234	8	4.62288
Trial 1	1.3	Rep	M	0:02:27.098-0:02:27.364	BL	1.22272	8	4.58062
Trial 1	1.3	Rep	M	0:02:27.364-0:02:27.630	BL	1.65122	8	6.18592
Trial 1	1.3	Rep	M	0:02:27.630-0:02:27.896	BL	2.43329	8	9.11572
Trial 1	1.3	Rep	M	0:02:27.896-0:02:28.162	BL	1.27057	8	4.75986
Trial 1	1.3	Rep	M	0:02:28.162-0:02:28.428	BL	1.00026	8	3.74724
Trial 1	1.3	Rep	M	0:02:28.428-0:02:28.694	BL	1.18465	8	4.43796
Trial 1	1.3	Rep	M	0:02:28.694-0:02:28.960	BL	0.800433	8	2.99864
Trial 1	1.3	Rep	M	0:02:28.960-0:02:29.226	BL	1.36982	8	5.13168
Trial 1	1.3	Rep	M	0:02:29.226-0:02:29.492	BL	1.69771	8	6.36005
Trial 1	1.3	Rep	M	0:02:29.492-0:02:29.758	BL	0.886824	8	3.32227
Trial 1	1.3	Rep	M	0:02:29.758-0:02:30.024	BL	1.06508	8	3.99004
Trial 1	1.3	Rep	M	0:02:30.024-0:02:30.290	BL	0.599712	8	2.24668
Trial 1	1.3	Rep	M	0:02:30.290-0:02:30.556	BL	1.09024	8	4.08432
Trial 1	1.3	Rep	M	0:02:30.556-0:02:30.822	BL	0.759879	8	2.84669
Trial 1	1.3	Rep	M	0:02:30.822-0:02:31.088	BL	0.329885	8	1.23583
Trial 1	1.3	Rep	M	0:02:31.088-0:02:31.354	BL	1.25716	8	4.70962
Trial 1	1.3	Rep	M	0:02:31.354-0:02:31.620	BL	0.717184	8	2.68675
Trial 1	1.3	Rep	M	0:02:31.620-0:02:31.886	BL	0.290578	8	1.08858
Trial 1	1.3	Rep	M	0:02:31.886-0:02:32.152	BL	0.167969	7	0.719153
Trial 1	1.3	Rep	M	0:02:32.152-0:02:32.418	BL	0.220866	8	0.827417
Trial 1	1.3	Rep	M	0:02:32.418-0:02:32.684	BL	0.208533	8	0.781211
Trial 1	1.3	Rep	M	0:02:32.684-0:02:32.950	BL	0.130254	8	0.487964
Trial 1	1.3	Rep	M	0:02:32.950-0:02:33.216	BL	0.286501	8	1.0733
Trial 1	1.3	Rep	M	0:02:33.216-0:02:33.482	BL	0.131932	8	0.494248
Trial 1	1.3	Rep	M	0:02:33.482-0:02:33.748	BL	0.178887	8	0.670154
Trial 1	1.3	Rep	M	0:02:33.748-0:02:34.014	BL	0.0999983	8	0.374619
Trial 1	1.3	Rep	M	0:02:34.014-0:02:34.280	BL	0.0771511	8	0.289026
Trial 1	1.3	Rep	M	0:02:34.280-0:02:34.546	BL	0.148061	8	0.554673
Trial 1	1.3	Rep	M	0:02:34.546-0:02:34.812	BL	0.182247	8	0.682742
Trial 1	1.3	Rep	M	0:02:34.812-0:02:35.078	BL	0.138019	8	0.517058
Trial 1	1.3	Rep	M	0:02:35.078-0:02:35.344	BL	0.0798975	8	0.299316
Trial 1	1.3	Rep	M	0:02:35.344-0:02:35.610	BL	0.125509	8	0.470188
Trial 1	1.3	Rep	M	0:02:35.610-0:02:35.876	BL	0.105802	8	0.396362
Trial 1	1.3	Rep	M	0:02:35.876-0:02:36.142	BL	0.0974346	8	0.365013
Trial 1	1.3	Rep	M	0:02:36.142-0:02:36.408	BL	0.100864	8	0.377863
Trial 1	1.3	Rep	M	0:02:36.408-0:02:36.674	BL	0.106884	8	0.40041
Trial 1	1.3	Rep	M	0:02:36.674-0:02:36.940	BL	0.109899	8	0.411708
Trial 1	1.3	Rep	M	0:02:36.940-0:02:37.206	BL	0.154042	8	0.577084
Trial 1	1.3	Rep	M	0:02:37.206-0:02:37.472	BL	0.143103	8	0.536097
Trial 1	1.3	Rep	M	0:02:37.472-0:02:37.738	BL	0.160703	8	0.602032
Trial 1	1.3	Rep	M	0:02:37.738-0:02:38.004	BL	0.181543	8	0.680107
Trial 1	1.3	Rep	M	0:02:38.004-0:02:38.270	BL	0.282873	8	1.05971
Trial 1	1.3	Rep	M	0:02:38.270-0:02:38.536	BL	0.51045	8	1.91228
Trial 1	1.3	Rep	M	0:02:38.536-0:02:38.802	BL	0.246411	8	0.923115
Trial 1	1.3	Rep	M	0:02:38.802-0:02:39.068	BL	0.388303	8	1.45468
Trial 1	1.3	Rep	M	0:02:39.068-0:02:39.334	BL	0.749718	8	2.80862
Trial 1	1.3	Rep	M	0:02:39.334-0:02:39.600	BL	0.463799	8	1.73749
Trial 1	1.3	Rep	M	0:02:39.600-0:02:39.866	BL	0.471308	8	1.76564
Trial 1	1.3	Rep	M	0:02:39.866-0:02:40.132	BL	0.328134	8	1.22927
Trial 1	1.3	Rep	M	0:02:40.132-0:02:40.398	BL	0.355565	8	1.33204
Trial 1	1.3	Rep	M	0:02:40.398-0:02:40.664	BL	0.429851	8	1.61032
Trial 1	1.3	Rep	M	0:02:40.664-0:02:40.930	BL	0.247019	8	0.925396
Trial 1	1.3	Rep	M	0:02:40.930-0:02:41.196	BL	0.177149	8	0.663645
Trial 1	1.3	Rep	M	0:02:41.196-0:02:41.462	BL	0.114423	8	0.428657
Trial 1	1.3	Rep	M	0:02:41.462-0:02:41.728	BL	0.202324	7	0.866234
Trial 1	1.3	Rep	M	0:02:41.728-0:02:41.994	BL	0.352482	8	1.32049
Trial 1	1.3	Rep	M	0:02:41.994-0:02:42.260	BL	0.5972	8	2.23726
Trial 1	1.3	Rep	M	0:02:42.260-0:02:42.526	BL	0.642009	8	2.40513
Trial 1	1.3	Rep	M	0:02:42.526-0:02:42.792	BL	0.580783	8	2.17576
Trial 1	1.3	Rep	M	0:02:42.792-0:02:43.058	BL	1.13321	8	4.24527
Trial 1	1.3	Rep	M	0:02:43.058-0:02:43.324	BL	1.90533	8	7.13785
Trial 1	1.3	Rep	M	0:02:43.324-0:02:43.590	BL	4.04999	8	15.1723
Trial 1	1.3	Rep	M	0:02:43.590-0:02:43.856	BL	1.98111	8	7.42175
Trial 1	1.3	Rep	M	0:02:43.856-0:02:44.122	BL	0.409201	8	1.53298
Trial 1	1.3	Rep	M	0:02:44.122-0:02:44.388	BL	0.440059	8	1.64856
Trial 1	1.3	Rep	M	0:02:44.388-0:02:44.654	BL	1.31231	8	4.91626
Trial 1	1.3	Rep	M	0:02:44.654-0:02:44.920	BL	0.73145	8	2.74019
Trial 1	1.3	Rep	M	0:02:44.920-0:02:45.186	BL	2.17393	8	8.14409
Trial 1	1.3	Rep	M	0:02:45.186-0:02:45.452	BL	0.861015	8	3.22559
Trial 1	1.3	Rep	M	0:02:45.452-0:02:45.718	BL	1.94601	8	7.29021
Trial 1	1.3	Rep	M	0:02:45.718-0:02:45.984	BL	2.1223	8	7.9507
Trial 1	1.3	Rep	M	0:02:45.984-0:02:46.250	BL	0.524009	8	1.96306
Trial 1	1.3	Rep	M	0:02:46.250-0:02:46.516	BL	2.80648	8	10.5137
Trial 1	1.3	Rep	M	0:02:46.516-0:02:46.782	BL	2.51462	8	9.42044
Trial 1	1.3	Rep	M	0:02:46.782-0:02:47.048	BL	1.05234	8	3.94233
Trial 1	1.3	Rep	M	0:02:47.048-0:02:47.314	BL	1.83025	8	6.85662
Trial 1	1.3	Rep	M	0:02:47.314-0:02:47.580	BL	1.00687	8	3.77196
Trial 1	1.3	Rep	M	0:02:47.580-0:02:47.846	BL	0.73773	8	2.76371
Trial 1	1.3	Rep	M	0:02:47.846-0:02:48.112	BL	1.56145	8	5.84957
Trial 1	1.3	Rep	M	0:02:48.112-0:02:48.378	BL	1.31012	8	4.90801
Trial 1	1.3	Rep	M	0:02:48.378-0:02:48.644	BL	0.262579	8	0.98369
Trial 1	1.3	Rep	M	0:02:48.644-0:02:48.910	BL	0.307212	8	1.15089
Trial 1	1.3	Rep	M	0:02:48.910-0:02:49.176	BL	0.276285	8	1.03503
Trial 1	1.3	Rep	M	0:02:49.176-0:02:49.442	BL	0.88791	8	3.32634
Trial 1	1.3	Rep	M	0:02:49.442-0:02:49.708	BL	0.297907	8	1.11603
Trial 1	1.3	Rep	M	0:02:49.708-0:02:49.974	BL	0.82273	8	3.08216
Trial 1	1.3	Rep	M	0:02:49.974-0:02:50.240	BL	0.392952	8	1.47209
Trial 1	1.3	Rep	M	0:02:50.240-0:02:50.506	BL	0.451816	8	1.69261
Trial 1	1.3	Rep	M	0:02:50.506-0:02:50.772	BL	1.19013	8	4.45852
Trial 1	1.3	Rep	M	0:02:50.772-0:02:51.038	BL	2.44003	8	9.14097
Trial 1	1.3	Rep	M	0:02:51.038-0:02:51.304	BL	1.04842	7	4.48873
Trial 1	1.3	Rep	M	0:02:51.304-0:02:51.570	BL	0.568751	8	2.13069
Trial 1	1.3	Rep	M	0:02:51.570-0:02:51.836	BL	1.57598	8	5.90401
Trial 1	1.3	Rep	M	0:02:51.836-0:02:52.102	BL	0.719741	8	2.69634
Trial 1	1.3	Rep	M	0:02:52.102-0:02:52.368	BL	1.50841	8	5.65088
Trial 1	1.3	Rep	M	0:02:52.368-0:02:52.634	BL	1.30006	8	4.87034
Trial 1	1.3	Rep	M	0:02:52.634-0:02:52.900	BL	2.11337	8	7.91718
Trial 1	1.3	Rep	M	0:02:52.900-0:02:53.166	BL	0.671911	8	2.51714
Trial 1	1.3	Rep	M	0:02:53.166-0:02:53.432	BL	1.49286	8	5.59264
Trial 1	1.3	Rep	M	0:02:53.432-0:02:53.698	BL	1.74462	8	6.53576
Trial 1	1.3	Rep	M	0:02:53.698-0:02:53.964	BL	0.367257	8	1.37583
Trial 1	1.3	Rep	M	0:02:53.964-0:02:54.230	BL	0.334272	8	1.25227
Trial 1	1.3	Rep	M	0:02:54.230-0:02:54.496	BL	0.125214	8	0.469082
Trial 1	1.3	Rep	M	0:02:54.496-0:02:54.762	BL	0.154361	8	0.578273
Trial 1	1.3	Rep	M	0:02:54.762-0:02:55.028	BL	0.666457	8	2.49671
Trial 1	1.3	Rep	M	0:02:55.028-0:02:55.294	BL	1.21833	8	4.56415
Trial 1	1.3	Rep	M	0:02:55.294-0:02:55.560	BL	0.500194	8	1.87385
Trial 1	1.3	Rep	M	0:02:55.560-0:02:55.826	BL	0.165175	8	0.61879
Trial 1	1.3	Rep	M	0:02:55.826-0:02:56.092	BL	0.495931	8	1.85787
Trial 1	1.3	Rep	M	0:02:56.092-0:02:56.358	BL	0.803735	8	3.01099
Trial 1	1.3	Rep	M	0:02:56.358-0:02:56.624	BL	0.844458	8	3.16354
Trial 1	1.3	Rep	M	0:02:56.624-0:02:56.890	BL	0.984485	8	3.68814
Trial 1	1.3	Rep	M	0:02:56.890-0:02:57.156	BL	0.610917	8	2.28865
Trial 1	1.3	Rep	M	0:02:57.156-0:02:57.422	BL	0.444209	8	1.66412
Trial 1	1.3	Rep	M	0:02:57.422-0:02:57.688	BL	0.442503	8	1.65772
Trial 1	1.3	Rep	M	0:02:57.688-0:02:57.954	BL	1.78025	8	6.66925
Trial 1	1.3	Rep	M	0:02:57.954-0:02:58.220	BL	1.23362	8	4.62145
Trial 1	1.3	Rep	M	0:02:58.220-0:02:58.486	BL	0.913171	8	3.42096
Trial 1	1.3	Rep	M	0:02:58.486-0:02:58.752	BL	1.13928	8	4.26803
Trial 1	1.3	Rep	M	0:02:58.752-0:02:59.018	BL	0.335027	8	1.25509
Trial 1	1.3	Rep	M	0:02:59.018-0:02:59.284	BL	0.183335	8	0.68682
Trial 1	1.3	Rep	M	0:02:59.284-0:02:59.550	BL	0.179935	8	0.674085
Trial 1	1.3	Rep	M	0:02:59.550-0:02:59.816	BL	0.236273	8	0.885135
Trial 1	1.3	Rep	M	0:02:59.816-0:03:00.082	BL	0.229631	8	0.860256
Trial 1	1.3	Rep	M	0:03:00.082-0:03:00.348	CS1a	0.345451	8	1.29414
Trial 1	1.3	Rep	M	0:03:00.348-0:03:00.614	CS1a	0.355091	8	1.33026
Trial 1	1.3	Rep	M	0:03:00.614-0:03:00.880	CS1a	0.814545	7	3.48741
Trial 1	1.3	Rep	M	0:03:00.880-0:03:01.146	CS1a	1.59898	8	5.99018
Trial 1	1.3	Rep	M	0:03:01.146-0:03:01.412	CS1a	0.513536	8	1.92383
Trial 1	1.3	Rep	M	0:03:01.412-0:03:01.678	CS1a	0.60892	8	2.28117
Trial 1	1.3	Rep	M	0:03:01.678-0:03:01.944	CS1a	0.537534	8	2.01373
Trial 1	1.3	Rep	M	0:03:01.944-0:03:02.210	CS1a	1.12249	8	4.20514
Trial 1	1.3	Rep	M	0:03:02.210-0:03:02.476	CS1a	1.19281	8	4.46859
Trial 1	1.3	Rep	M	0:03:02.476-0:03:02.742	CS1a	0.753624	8	2.82326
Trial 1	1.3	Rep	M	0:03:02.742-0:03:03.008	CS1a	0.628951	8	2.35621
Trial 1	1.3	Rep	M	0:03:03.008-0:03:03.274	CS1a	1.51143	8	5.66219
Trial 1	1.3	Rep	M	0:03:03.274-0:03:03.540	CS1a	0.789463	8	2.95751
Trial 1	1.3	Rep	M	0:03:03.540-0:03:03.806	CS1a	0.299323	8	1.12135
Trial 1	1.3	Rep	M	0:03:03.806-0:03:04.072	CS1a	0.658173	8	2.46569
Trial 1	1.3	Rep	M	0:03:04.072-0:03:04.338	CS1a	1.23849	8	4.63971
Trial 1	1.3	Rep	M	0:03:04.338-0:03:04.604	CS1a	0.493489	8	1.84873
Trial 1	1.3	Rep	M	0:03:04.604-0:03:04.870	CS1a	0.610278	8	2.28625
Trial 1	1.3	Rep	M	0:03:04.870-0:03:05.136	CS1a	0.784251	8	2.938
Trial 1	1.3	Rep	M	0:03:05.136-0:03:05.402	CS1a	2.0009	8	7.49585
Trial 1	1.3	Rep	M	0:03:05.402-0:03:05.668	CS1a	2.95174	8	11.058
Trial 1	1.3	Rep	M	0:03:05.668-0:03:05.934	CS1a	4.31287	8	16.1571
Trial 1	1.3	Rep	M	0:03:05.934-0:03:06.200	CS1a	4.74005	8	17.7574
Trial 1	1.3	Rep	M	0:03:06.200-0:03:06.466	CS1a	1.65722	8	6.2084
Trial 1	1.3	Rep	M	0:03:06.466-0:03:06.732	CS1a	0.860559	8	3.22389
Trial 1	1.3	Rep	M	0:03:06.732-0:03:06.998	CS1a	0.596322	8	2.23398
Trial 1	1.3	Rep	M	0:03:06.998-0:03:07.264	CS1a	0.26281	8	0.984549
Trial 1	1.3	Rep	M	0:03:07.264-0:03:07.530	CS1a	0.161521	8	0.605095
Trial 1	1.3	Rep	M	0:03:07.530-0:03:07.796	CS1a	0.916922	8	3.43502
Trial 1	1.3	Rep	M	0:03:07.796-0:03:08.062	CS1a	0.461774	8	1.72992
Trial 1	1.3	Rep	M	0:03:08.062-0:03:08.328	CS1a	0.418493	8	1.56778
Trial 1	1.3	Rep	M	0:03:08.328-0:03:08.594	CS1a	2.60042	8	9.74184
Trial 1	1.3	Rep	M	0:03:08.594-0:03:08.860	CS1a	1.36707	8	5.12141
Trial 1	1.3	Rep	M	0:03:08.860-0:03:09.126	CS1a	1.88513	8	7.06216
Trial 1	1.3	Rep	M	0:03:09.126-0:03:09.392	CS1a	0.979094	8	3.66793
Trial 1	1.3	Rep	M	0:03:09.392-0:03:09.658	CS1a	0.781925	8	2.92929
Trial 1	1.3	Rep	M	0:03:09.658-0:03:09.924	CS1a	0.81687	8	3.0602
Trial 1	1.3	Rep	M	0:03:09.924-0:03:10.190	CS1a	0.4866	7	2.08333
Trial 1	1.3	Rep	M	0:03:10.190-0:03:10.456	CS1b	1.52244	8	5.70346
Trial 1	1.3	Rep	M	0:03:10.456-0:03:10.722	CS1b	3.77763	8	14.1519
Trial 1	1.3	Rep	M	0:03:10.722-0:03:10.988	CS1b	2.10347	8	7.8801
Trial 1	1.3	Rep	M	0:03:10.988-0:03:11.254	CS1b	0.243786	8	0.913287
Trial 1	1.3	Rep	M	0:03:11.254-0:03:11.520	CS1b	0.146226	8	0.547802
Trial 1	1.3	Rep	M	0:03:11.520-0:03:11.786	CS1b	0.133123	8	0.498714
Trial 1	1.3	Rep	M	0:03:11.786-0:03:12.052	CS1b	0.0687564	8	0.257578
Trial 1	1.3	Rep	M	0:03:12.052-0:03:12.318	CS1b	0.218877	8	0.819963
Trial 1	1.3	Rep	M	0:03:12.318-0:03:12.584	CS1b	2.0244	8	7.58394
Trial 1	1.3	Rep	M	0:03:12.584-0:03:12.850	CS1b	5.36798	8	20.1098
Trial 1	1.3	Rep	M	0:03:12.850-0:03:13.116	CS1b	3.39107	8	12.7038
Trial 1	1.3	Rep	M	0:03:13.116-0:03:13.382	CS1b	1.23705	8	4.63427
Trial 1	1.3	Rep	M	0:03:13.382-0:03:13.648	CS1b	0.288789	8	1.08188
Trial 1	1.3	Rep	M	0:03:13.648-0:03:13.914	CS1b	0.420868	8	1.57669
Trial 1	1.3	Rep	M	0:03:13.914-0:03:14.180	CS1b	0.498229	8	1.86649
Trial 1	1.3	Rep	M	0:03:14.180-0:03:14.446	CS1b	0.181073	8	0.678344
Trial 1	1.3	Rep	M	0:03:14.446-0:03:14.712	CS1b	0.224001	8	0.839159
Trial 1	1.3	Rep	M	0:03:14.712-0:03:14.978	CS1b	0.0323159	8	0.121063
Trial 1	1.3	Rep	M	0:03:14.978-0:03:15.244	CS1b	0.166751	8	0.624691
Trial 1	1.3	Rep	M	0:03:15.244-0:03:15.510	CS1b	0.118396	8	0.443543
Trial 1	1.3	Rep	M	0:03:15.510-0:03:15.776	CS1b	0.164567	8	0.616514
Trial 1	1.3	Rep	M	0:03:15.776-0:03:16.042	CS1b	0.243338	8	0.911604
Trial 1	1.3	Rep	M	0:03:16.042-0:03:16.308	CS1b	0.119063	8	0.446039
Trial 1	1.3	Rep	M	0:03:16.308-0:03:16.574	CS1b	0.0946352	8	0.354529
Trial 1	1.3	Rep	M	0:03:16.574-0:03:16.840	CS1b	0.113037	8	0.423465
Trial 1	1.3	Rep	M	0:03:16.840-0:03:17.106	CS1b	0.17933	8	0.671818
Trial 1	1.3	Rep	M	0:03:17.106-0:03:17.372	CS1b	0.0890272	8	0.333518
Trial 1	1.3	Rep	M	0:03:17.372-0:03:17.638	CS1b	0.106702	8	0.39973
Trial 1	1.3	Rep	M	0:03:17.638-0:03:17.904	CS1b	0.305531	8	1.1446
Trial 1	1.3	Rep	M	0:03:17.904-0:03:18.170	CS1b	1.79269	8	6.71584
Trial 1	1.3	Rep	M	0:03:18.170-0:03:18.436	CS1b	2.34084	8	8.7694
Trial 1	1.3	Rep	M	0:03:18.436-0:03:18.702	CS1b	0.548125	8	2.05343
Trial 1	1.3	Rep	M	0:03:18.702-0:03:18.968	CS1b	0.44715	8	1.67513
Trial 1	1.3	Rep	M	0:03:18.968-0:03:19.234	CS1b	0.190704	8	0.714429
Trial 1	1.3	Rep	M	0:03:19.234-0:03:19.500	CS1b	0.13209	8	0.494841
Trial 1	1.3	Rep	M	0:03:19.500-0:03:19.766	CS1b	0.168566	7	0.721704
Trial 1	1.3	Rep	M	0:03:19.766-0:03:20.032	CS1b	0.175182	8	0.656276
Trial 1	1.3	Rep	M	0:03:20.032-0:03:20.298	IT1	0.826442	8	3.09607
Trial 1	1.3	Rep	M	0:03:20.298-0:03:20.564	IT1	2.14181	8	8.02373
Trial 1	1.3	Rep	M	0:03:20.564-0:03:20.830	IT1	8.24737	8	30.8968
Trial 1	1.3	Rep	M	0:03:20.830-0:03:21.096	IT1	20.2222	8	75.7574
Trial 1	1.3	Rep	M	0:03:21.096-0:03:21.362	IT1	2.86472	8	10.732
Trial 1	1.3	Rep	M	0:03:21.362-0:03:21.628	IT1	2.45754	8	9.20655
Trial 1	1.3	Rep	M	0:03:21.628-0:03:21.894	IT1	1.15752	8	4.33637
Trial 1	1.3	Rep	M	0:03:21.894-0:03:22.160	IT1	0.612263	8	2.2937
Trial 1	1.3	Rep	M	0:03:22.160-0:03:22.426	IT1	0.182181	8	0.682495
Trial 1	1.3	Rep	M	0:03:22.426-0:03:22.692	IT1	0.0990861	8	0.371201
Trial 1	1.3	Rep	M	0:03:22.692-0:03:22.958	IT1	0.158373	8	0.593303
Trial 1	1.3	Rep	M	0:03:22.958-0:03:23.224	IT1	0.308511	8	1.15577
Trial 1	1.3	Rep	M	0:03:23.224-0:03:23.490	IT1	0.12477	8	0.467421
Trial 1	1.3	Rep	M	0:03:23.490-0:03:23.756	IT1	0.343175	8	1.28562
Trial 1	1.3	Rep	M	0:03:23.756-0:03:24.022	IT1	0.212992	8	0.79792
Trial 1	1.3	Rep	M	0:03:24.022-0:03:24.288	IT1	0.463397	8	1.736
Trial 1	1.3	Rep	M	0:03:24.288-0:03:24.554	IT1	0.408251	8	1.52941
Trial 1	1.3	Rep	M	0:03:24.554-0:03:24.820	IT1	0.930403	8	3.48553
Trial 1	1.3	Rep	M	0:03:24.820-0:03:25.086	IT1	0.615934	8	2.30745
Trial 1	1.3	Rep	M	0:03:25.086-0:03:25.352	IT1	0.255828	8	0.958395
Trial 1	1.3	Rep	M	0:03:25.352-0:03:25.618	IT1	0.109102	8	0.408719
Trial 1	1.3	Rep	M	0:03:25.618-0:03:25.884	IT1	0.0587075	8	0.219934
Trial 1	1.3	Rep	M	0:03:25.884-0:03:26.150	IT1	0.974695	8	3.65146
Trial 1	1.3	Rep	M	0:03:26.150-0:03:26.416	IT1	0.329686	8	1.23508
Trial 1	1.3	Rep	M	0:03:26.416-0:03:26.682	IT1	0.599677	8	2.24655
Trial 1	1.3	Rep	M	0:03:26.682-0:03:26.948	IT1	0.505474	8	1.89363
Trial 1	1.3	Rep	M	0:03:26.948-0:03:27.214	IT1	0.221094	8	0.828273
Trial 1	1.3	Rep	M	0:03:27.214-0:03:27.480	IT1	0.405089	8	1.51757
Trial 1	1.3	Rep	M	0:03:27.480-0:03:27.746	IT1	0.421518	8	1.57911
Trial 1	1.3	Rep	M	0:03:27.746-0:03:28.012	IT1	0.368075	8	1.3789
Trial 1	1.3	Rep	M	0:03:28.012-0:03:28.278	IT1	0.24987	8	0.93607
Trial 1	1.3	Rep	M	0:03:28.278-0:03:28.544	IT1	0.345385	8	1.29389
Trial 1	1.3	Rep	M	0:03:28.544-0:03:28.810	IT1	0.237002	8	0.887869
Trial 1	1.3	Rep	M	0:03:28.810-0:03:29.076	IT1	0.209514	8	0.784891
Trial 1	1.3	Rep	M	0:03:29.076-0:03:29.342	IT1	0.263029	7	1.12614
Trial 1	1.3	Rep	M	0:03:29.342-0:03:29.608	IT1	0.125632	8	0.470649
Trial 1	1.3	Rep	M	0:03:29.608-0:03:29.874	IT1	0.198601	8	0.744005
Trial 1	1.3	Rep	M	0:03:29.874-0:03:30.140	IT1	0.899674	8	3.37042
Trial 1	1.3	Rep	M	0:03:30.140-0:03:30.406	IT1	4.07355	8	15.2605
Trial 1	1.3	Rep	M	0:03:30.406-0:03:30.672	IT1	3.8928	8	14.5834
Trial 1	1.3	Rep	M	0:03:30.672-0:03:30.938	IT1	3.73597	8	13.9959
Trial 1	1.3	Rep	M	0:03:30.938-0:03:31.204	IT1	3.45243	8	12.9337
Trial 1	1.3	Rep	M	0:03:31.204-0:03:31.470	IT1	3.09884	8	11.609
Trial 1	1.3	Rep	M	0:03:31.470-0:03:31.736	IT1	2.10873	8	7.8998
Trial 1	1.3	Rep	M	0:03:31.736-0:03:32.002	IT1	1.66258	8	6.22844
Trial 1	1.3	Rep	M	0:03:32.002-0:03:32.268	IT1	0.904225	8	3.38746
Trial 1	1.3	Rep	M	0:03:32.268-0:03:32.534	IT1	0.283461	8	1.06192
Trial 1	1.3	Rep	M	0:03:32.534-0:03:32.800	IT1	0.549365	8	2.05807
Trial 1	1.3	Rep	M	0:03:32.800-0:03:33.066	IT1	0.431066	8	1.61488
Trial 1	1.3	Rep	M	0:03:33.066-0:03:33.332	IT1	0.553825	8	2.07476
Trial 1	1.3	Rep	M	0:03:33.332-0:03:33.598	IT1	0.553876	8	2.07497
Trial 1	1.3	Rep	M	0:03:33.598-0:03:33.864	IT1	0.519203	8	1.94507
Trial 1	1.3	Rep	M	0:03:33.864-0:03:34.130	IT1	0.496927	8	1.86161
Trial 1	1.3	Rep	M	0:03:34.130-0:03:34.396	IT1	0.579962	8	2.17268
Trial 1	1.3	Rep	M	0:03:34.396-0:03:34.662	IT1	1.01297	8	3.79483
Trial 1	1.3	Rep	M	0:03:34.662-0:03:34.928	IT1	0.645879	8	2.41963
Trial 1	1.3	Rep	M	0:03:34.928-0:03:35.194	IT1	0.269973	8	1.01138
Trial 1	1.3	Rep	M	0:03:35.194-0:03:35.460	IT1	0.931166	8	3.48839
Trial 1	1.3	Rep	M	0:03:35.460-0:03:35.726	IT1	0.454011	8	1.70083
Trial 1	1.3	Rep	M	0:03:35.726-0:03:35.992	IT1	0.457937	8	1.71554
Trial 1	1.3	Rep	M	0:03:35.992-0:03:36.258	IT1	0.872135	8	3.26722
Trial 1	1.3	Rep	M	0:03:36.258-0:03:36.524	IT1	0.892448	8	3.34332
Trial 1	1.3	Rep	M	0:03:36.524-0:03:36.790	IT1	0.870894	8	3.2626
Trial 1	1.3	Rep	M	0:03:36.790-0:03:37.056	IT1	0.879315	8	3.29413
Trial 1	1.3	Rep	M	0:03:37.056-0:03:37.322	IT1	1.38876	8	5.20265
Trial 1	1.3	Rep	M	0:03:37.322-0:03:37.588	IT1	0.517286	8	1.93788
Trial 1	1.3	Rep	M	0:03:37.588-0:03:37.854	IT1	0.701134	8	2.62661
Trial 1	1.3	Rep	M	0:03:37.854-0:03:38.120	IT1	0.781334	8	2.92707
Trial 1	1.3	Rep	M	0:03:38.120-0:03:38.386	IT1	0.55248	8	2.06973
Trial 1	1.3	Rep	M	0:03:38.386-0:03:38.652	IT1	0.349581	8	1.30962
Trial 1	1.3	Rep	M	0:03:38.652-0:03:38.918	IT1	0.174855	7	0.748632
Trial 1	1.3	Rep	M	0:03:38.918-0:03:39.184	IT1	0.319909	8	1.19845
Trial 1	1.3	Rep	M	0:03:39.184-0:03:39.450	IT1	0.575533	8	2.15609
Trial 1	1.3	Rep	M	0:03:39.450-0:03:39.716	IT1	0.353156	8	1.32302
Trial 1	1.3	Rep	M	0:03:39.716-0:03:39.982	IT1	0.442601	8	1.6581
Trial 1	1.3	Rep	M	0:03:39.982-0:03:40.248	IT1	0.438985	8	1.64454
Trial 1	1.3	Rep	M	0:03:40.248-0:03:40.514	IT1	0.543374	8	2.03561
Trial 1	1.3	Rep	M	0:03:40.514-0:03:40.780	IT1	0.355448	8	1.33159
Trial 1	1.3	Rep	M	0:03:40.780-0:03:41.046	IT1	0.508354	8	1.90441
Trial 1	1.3	Rep	M	0:03:41.046-0:03:41.312	IT1	1.05951	8	3.96917
Trial 1	1.3	Rep	M	0:03:41.312-0:03:41.578	IT1	0.685471	8	2.56794
Trial 1	1.3	Rep	M	0:03:41.578-0:03:41.844	IT1	0.302532	8	1.13337
Trial 1	1.3	Rep	M	0:03:41.844-0:03:42.110	IT1	0.268692	8	1.00658
Trial 1	1.3	Rep	M	0:03:42.110-0:03:42.376	IT1	0.307355	8	1.15142
Trial 1	1.3	Rep	M	0:03:42.376-0:03:42.642	IT1	0.748673	8	2.80471
Trial 1	1.3	Rep	M	0:03:42.642-0:03:42.908	IT1	0.787354	8	2.94962
Trial 1	1.3	Rep	M	0:03:42.908-0:03:43.174	IT1	0.66374	8	2.48653
Trial 1	1.3	Rep	M	0:03:43.174-0:03:43.440	IT1	0.50157	8	1.879
Trial 1	1.3	Rep	M	0:03:43.440-0:03:43.706	IT1	0.668591	8	2.50472
Trial 1	1.3	Rep	M	0:03:43.706-0:03:43.972	IT1	0.569948	8	2.13517
Trial 1	1.3	Rep	M	0:03:43.972-0:03:44.238	IT1	1.56598	8	5.86655
Trial 1	1.3	Rep	M	0:03:44.238-0:03:44.504	IT1	1.60541	8	6.0143
Trial 1	1.3	Rep	M	0:03:44.504-0:03:44.770	IT1	0.944309	8	3.53761
Trial 1	1.3	Rep	M	0:03:44.770-0:03:45.036	IT1	0.655797	8	2.45678
Trial 1	1.3	Rep	M	0:03:45.036-0:03:45.302	IT1	0.220791	8	0.827133
Trial 1	1.3	Rep	M	0:03:45.302-0:03:45.568	IT1	0.37123	8	1.39071
Trial 1	1.3	Rep	M	0:03:45.568-0:03:45.834	IT1	0.809763	8	3.03358
Trial 1	1.3	Rep	M	0:03:45.834-0:03:46.100	IT1	1.13379	8	4.24747
Trial 1	1.3	Rep	M	0:03:46.100-0:03:46.366	IT1	0.743757	8	2.7863
Trial 1	1.3	Rep	M	0:03:46.366-0:03:46.632	IT1	0.197915	8	0.741439
Trial 1	1.3	Rep	M	0:03:46.632-0:03:46.898	IT1	0.404642	8	1.51588
Trial 1	1.3	Rep	M	0:03:46.898-0:03:47.164	IT1	0.25929	8	0.971366
Trial 1	1.3	Rep	M	0:03:47.164-0:03:47.430	IT1	1.27764	8	4.78635
Trial 1	1.3	Rep	M	0:03:47.430-0:03:47.696	IT1	0.736894	8	2.76059
Trial 1	1.3	Rep	M	0:03:47.696-0:03:47.962	IT1	2.33738	8	8.7564
Trial 1	1.3	Rep	M	0:03:47.962-0:03:48.228	IT1	1.85188	7	7.92868
Trial 1	1.3	Rep	M	0:03:48.228-0:03:48.494	IT1	2.37019	8	8.87934
Trial 1	1.3	Rep	M	0:03:48.494-0:03:48.760	IT1	1.95132	8	7.31013
Trial 1	1.3	Rep	M	0:03:48.760-0:03:49.026	IT1	1.29788	8	4.8622
Trial 1	1.3	Rep	M	0:03:49.026-0:03:49.292	IT1	1.23059	8	4.61013
Trial 1	1.3	Rep	M	0:03:49.292-0:03:49.558	IT1	2.46128	8	9.22053
Trial 1	1.3	Rep	M	0:03:49.558-0:03:49.824	IT1	1.91483	8	7.17344
Trial 1	1.3	Rep	M	0:03:49.824-0:03:50.090	IT1	1.43879	8	5.39005
Trial 1	1.3	Rep	M	0:03:50.090-0:03:50.356	IT1	0.952069	8	3.56668
Trial 1	1.3	Rep	M	0:03:50.356-0:03:50.622	IT1	0.447908	8	1.67798
Trial 1	1.3	Rep	M	0:03:50.622-0:03:50.888	IT1	0.297444	8	1.11429
Trial 1	1.3	Rep	M	0:03:50.888-0:03:51.154	IT1	0.248348	8	0.930378
Trial 1	1.3	Rep	M	0:03:51.154-0:03:51.420	IT1	0.356518	8	1.3356
Trial 1	1.3	Rep	M	0:03:51.420-0:03:51.686	IT1	0.87215	8	3.26729
Trial 1	1.3	Rep	M	0:03:51.686-0:03:51.952	IT1	2.33058	8	8.73097
Trial 1	1.3	Rep	M	0:03:51.952-0:03:52.218	IT1	1.29581	8	4.85443
Trial 1	1.3	Rep	M	0:03:52.218-0:03:52.484	IT1	2.58168	8	9.67161
Trial 1	1.3	Rep	M	0:03:52.484-0:03:52.750	IT1	1.05818	8	3.96417
Trial 1	1.3	Rep	M	0:03:52.750-0:03:53.016	IT1	3.37837	8	12.6562
Trial 1	1.3	Rep	M	0:03:53.016-0:03:53.282	IT1	0.753419	8	2.82251
Trial 1	1.3	Rep	M	0:03:53.282-0:03:53.548	IT1	1.16903	8	4.37947
Trial 1	1.3	Rep	M	0:03:53.548-0:03:53.814	IT1	3.21235	8	12.0343
Trial 1	1.3	Rep	M	0:03:53.814-0:03:54.080	IT1	2.39302	8	8.96482
Trial 1	1.3	Rep	M	0:03:54.080-0:03:54.346	IT1	0.886705	8	3.32181
Trial 1	1.3	Rep	M	0:03:54.346-0:03:54.612	IT1	0.321029	8	1.20267
Trial 1	1.3	Rep	M	0:03:54.612-0:03:54.878	IT1	0.256003	8	0.95905
Trial 1	1.3	Rep	M	0:03:54.878-0:03:55.144	IT1	0.378396	8	1.41757
Trial 1	1.3	Rep	M	0:03:55.144-0:03:55.410	IT1	0.316905	8	1.1872
Trial 1	1.3	Rep	M	0:03:55.410-0:03:55.676	IT1	0.634116	8	2.37555
Trial 1	1.3	Rep	M	0:03:55.676-0:03:55.942	IT1	0.954493	8	3.57579
Trial 1	1.3	Rep	M	0:03:55.942-0:03:56.208	IT1	0.775073	8	2.90361
Trial 1	1.3	Rep	M	0:03:56.208-0:03:56.474	IT1	0.534185	8	2.00119
Trial 1	1.3	Rep	M	0:03:56.474-0:03:56.740	IT1	0.940611	8	3.52375
Trial 1	1.3	Rep	M	0:03:56.740-0:03:57.006	IT1	2.84814	8	10.6698
Trial 1	1.3	Rep	M	0:03:57.006-0:03:57.272	IT1	3.64639	8	13.6603
Trial 1	1.3	Rep	M	0:03:57.272-0:03:57.538	IT1	3.67423	8	13.7646
Trial 1	1.3	Rep	M	0:03:57.538-0:03:57.804	IT1	2.39718	7	10.2633
Trial 1	1.3	Rep	M	0:03:57.804-0:03:58.070	IT1	3.27927	8	12.285
Trial 1	1.3	Rep	M	0:03:58.070-0:03:58.336	IT1	1.59211	8	5.96444
Trial 1	1.3	Rep	M	0:03:58.336-0:03:58.602	IT1	0.920188	8	3.44725
Trial 1	1.3	Rep	M	0:03:58.602-0:03:58.868	IT1	0.919765	8	3.44566
Trial 1	1.3	Rep	M	0:03:58.868-0:03:59.134	IT1	2.36625	8	8.86454
Trial 1	1.3	Rep	M	0:03:59.134-0:03:59.400	IT1	2.66059	8	9.96726
Trial 1	1.3	Rep	M	0:03:59.400-0:03:59.666	IT1	0.927764	8	3.47562
Trial 1	1.3	Rep	M	0:03:59.666-0:03:59.932	IT1	1.70744	8	6.39647
Trial 1	1.3	Rep	M	0:03:59.932-0:04:00.198	IT1	1.42114	8	5.32397
Trial 1	1.3	Rep	M	0:04:00.198-0:04:00.464	IT1	0.869826	8	3.25859
Trial 1	1.3	Rep	M	0:04:00.464-0:04:00.730	IT1	0.630787	8	2.3631
Trial 1	1.3	Rep	M	0:04:00.730-0:04:00.996	IT1	0.733921	8	2.74945
Trial 1	1.3	Rep	M	0:04:00.996-0:04:01.262	IT1	0.990443	8	3.71044
Trial 1	1.3	Rep	M	0:04:01.262-0:04:01.528	IT1	1.31783	8	4.93695
Trial 1	1.3	Rep	M	0:04:01.528-0:04:01.794	IT1	1.1434	8	4.28346
Trial 1	1.3	Rep	M	0:04:01.794-0:04:02.060	IT1	0.340073	8	1.274
Trial 1	1.3	Rep	M	0:04:02.060-0:04:02.326	IT1	3.29601	8	12.3477
Trial 1	1.3	Rep	M	0:04:02.326-0:04:02.592	IT1	5.08596	8	19.0533
Trial 1	1.3	Rep	M	0:04:02.592-0:04:02.858	IT1	2.336	8	8.75126
Trial 1	1.3	Rep	M	0:04:02.858-0:04:03.124	IT1	1.88019	8	7.04365
Trial 1	1.3	Rep	M	0:04:03.124-0:04:03.390	IT1	1.70331	8	6.38107
Trial 1	1.3	Rep	M	0:04:03.390-0:04:03.656	IT1	2.88083	8	10.7923
Trial 1	1.3	Rep	M	0:04:03.656-0:04:03.922	IT1	1.04216	8	3.90419
Trial 1	1.3	Rep	M	0:04:03.922-0:04:04.188	IT1	1.16652	8	4.3701
Trial 1	1.3	Rep	M	0:04:04.188-0:04:04.454	IT1	1.1868	8	4.44603
Trial 1	1.3	Rep	M	0:04:04.454-0:04:04.720	IT1	0.933176	8	3.49593
Trial 1	1.3	Rep	M	0:04:04.720-0:04:04.986	IT1	2.52957	8	9.4764
Trial 1	1.3	Rep	M	0:04:04.986-0:04:05.252	IT1	2.56157	8	9.59626
Trial 1	1.3	Rep	M	0:04:05.252-0:04:05.518	IT1	0.41551	8	1.5566
Trial 1	1.3	Rep	M	0:04:05.518-0:04:05.784	IT1	0.45382	8	1.70012
Trial 1	1.3	Rep	M	0:04:05.784-0:04:06.050	IT1	0.890664	8	3.33664
Trial 1	1.3	Rep	M	0:04:06.050-0:04:06.316	IT1	0.905714	8	3.39303
Trial 1	1.3	Rep	M	0:04:06.316-0:04:06.582	IT1	2.64689	8	9.91594
Trial 1	1.3	Rep	M	0:04:06.582-0:04:06.848	IT1	0.90032	8	3.37285
Trial 1	1.3	Rep	M	0:04:06.848-0:04:07.114	IT1	1.65687	8	6.20707
Trial 1	1.3	Rep	M	0:04:07.114-0:04:07.380	IT1	0.428951	7	1.83653
Trial 1	1.3	Rep	M	0:04:07.380-0:04:07.646	IT1	0.273591	8	1.02494
Trial 1	1.3	Rep	M	0:04:07.646-0:04:07.912	IT1	0.36942	8	1.38394
Trial 1	1.3	Rep	M	0:04:07.912-0:04:08.178	IT1	1.69323	8	6.3433
Trial 1	1.3	Rep	M	0:04:08.178-0:04:08.444	IT1	5.07233	8	19.0022
Trial 1	1.3	Rep	M	0:04:08.444-0:04:08.710	IT1	6.88106	8	25.7781
Trial 1	1.3	Rep	M	0:04:08.710-0:04:08.976	IT1	4.87922	8	18.2788
Trial 1	1.3	Rep	M	0:04:08.976-0:04:09.242	IT1	1.60639	8	6.01792
Trial 1	1.3	Rep	M	0:04:09.242-0:04:09.508	IT1	0.460616	8	1.72558
Trial 1	1.3	Rep	M	0:04:09.508-0:04:09.774	IT1	0.284534	8	1.06593
Trial 1	1.3	Rep	M	0:04:09.774-0:04:10.040	IT1	1.12763	8	4.22438
Trial 1	1.3	Rep	M	0:04:10.040-0:04:10.306	IT1	3.10144	8	11.6188
Trial 1	1.3	Rep	M	0:04:10.306-0:04:10.572	IT1	1.56947	8	5.87963
Trial 1	1.3	Rep	M	0:04:10.572-0:04:10.838	IT1	0.943469	8	3.53447
Trial 1	1.3	Rep	M	0:04:10.838-0:04:11.104	IT1	0.318149	8	1.19187
Trial 1	1.3	Rep	M	0:04:11.104-0:04:11.370	IT1	0.431166	8	1.61525
Trial 1	1.3	Rep	M	0:04:11.370-0:04:11.636	IT1	0.366564	8	1.37325
Trial 1	1.3	Rep	M	0:04:11.636-0:04:11.902	IT1	0.771332	8	2.88961
Trial 1	1.3	Rep	M	0:04:11.902-0:04:12.168	IT1	0.592655	8	2.22024
Trial 1	1.3	Rep	M	0:04:12.168-0:04:12.434	IT1	0.292823	8	1.09699
Trial 1	1.3	Rep	M	0:04:12.434-0:04:12.700	IT1	0.173912	8	0.651515
Trial 1	1.3	Rep	M	0:04:12.700-0:04:12.966	IT1	0.246259	8	0.922548
Trial 1	1.3	Rep	M	0:04:12.966-0:04:13.232	IT1	0.205982	8	0.771658
Trial 1	1.3	Rep	M	0:04:13.232-0:04:13.498	IT1	0.446689	8	1.67341
Trial 1	1.3	Rep	M	0:04:13.498-0:04:13.764	IT1	0.285896	8	1.07104
Trial 1	1.3	Rep	M	0:04:13.764-0:04:14.030	IT1	0.28602	8	1.07151
Trial 1	1.3	Rep	M	0:04:14.030-0:04:14.296	IT1	0.723919	8	2.712
Trial 1	1.3	Rep	M	0:04:14.296-0:04:14.562	IT1	0.400467	8	1.50024
Trial 1	1.3	Rep	M	0:04:14.562-0:04:14.828	IT1	0.556972	8	2.08656
Trial 1	1.3	Rep	M	0:04:14.828-0:04:15.094	IT1	0.743269	8	2.78447
Trial 1	1.3	Rep	M	0:04:15.094-0:04:15.360	IT1	0.693206	8	2.59692
Trial 1	1.3	Rep	M	0:04:15.360-0:04:15.626	IT1	0.76275	8	2.85746
Trial 1	1.3	Rep	M	0:04:15.626-0:04:15.892	IT1	0.524408	8	1.96455
Trial 1	1.3	Rep	M	0:04:15.892-0:04:16.158	IT1	0.315294	8	1.18117
Trial 1	1.3	Rep	M	0:04:16.158-0:04:16.424	IT1	0.398614	8	1.49331
Trial 1	1.3	Rep	M	0:04:16.424-0:04:16.690	IT1	0.895747	7	3.83507
Trial 1	1.3	Rep	M	0:04:16.690-0:04:16.956	IT1	1.2662	8	4.7435
Trial 1	1.3	Rep	M	0:04:16.956-0:04:17.222	IT1	1.19733	8	4.48551
Trial 1	1.3	Rep	M	0:04:17.222-0:04:17.488	IT1	0.61849	8	2.31701
Trial 1	1.3	Rep	M	0:04:17.488-0:04:17.754	IT1	0.521235	8	1.95268
Trial 1	1.3	Rep	M	0:04:17.754-0:04:18.020	IT1	0.911267	8	3.41384
Trial 1	1.3	Rep	M	0:04:18.020-0:04:18.286	IT1	1.65065	8	6.18374
Trial 1	1.3	Rep	M	0:04:18.286-0:04:18.552	IT1	1.20971	8	4.53188
Trial 1	1.3	Rep	M	0:04:18.552-0:04:18.818	IT1	0.489266	8	1.83291
Trial 1	1.3	Rep	M	0:04:18.818-0:04:19.084	IT1	1.48186	8	5.55143
Trial 1	1.3	Rep	M	0:04:19.084-0:04:19.350	IT1	2.11489	8	7.92291
Trial 1	1.3	Rep	M	0:04:19.350-0:04:19.616	IT1	3.58798	8	13.4414
Trial 1	1.3	Rep	M	0:04:19.616-0:04:19.882	IT1	2.98082	8	11.1669
Trial 1	1.3	Rep	M	0:04:19.882-0:04:20.148	IT1	2.55081	8	9.55596
Trial 1	1.3	Rep	M	0:04:20.148-0:04:20.414	IT1	2.14784	8	8.04638
Trial 1	1.3	Rep	M	0:04:20.414-0:04:20.680	IT1	2.20534	8	8.26171
Trial 1	1.3	Rep	M	0:04:20.680-0:04:20.946	IT1	3.88025	8	14.5364
Trial 1	1.3	Rep	M	0:04:20.946-0:04:21.212	IT1	1.2955	8	4.85328
Trial 1	1.3	Rep	M	0:04:21.212-0:04:21.478	IT1	1.53061	8	5.73408
Trial 1	1.3	Rep	M	0:04:21.478-0:04:21.744	IT1	3.62227	8	13.5699
Trial 1	1.3	Rep	M	0:04:21.744-0:04:22.010	IT1	0.823006	8	3.08317
Trial 1	1.3	Rep	M	0:04:22.010-0:04:22.276	IT1	1.67002	8	6.25631
Trial 1	1.3	Rep	M	0:04:22.276-0:04:22.542	IT1	1.98146	8	7.42305
Trial 1	1.3	Rep	M	0:04:22.542-0:04:22.808	IT1	2.28132	8	8.54639
Trial 1	1.3	Rep	M	0:04:22.808-0:04:23.074	IT1	2.29556	8	8.5998
Trial 1	1.3	Rep	M	0:04:23.074-0:04:23.340	IT1	2.66758	8	9.99341
Trial 1	1.3	Rep	M	0:04:23.340-0:04:23.606	IT1	3.92351	8	14.6984
Trial 1	1.3	Rep	M	0:04:23.606-0:04:23.872	IT1	3.2966	8	12.3499
Trial 1	1.3	Rep	M	0:04:23.872-0:04:24.138	IT1	2.97481	8	11.1444
Trial 1	1.3	Rep	M	0:04:24.138-0:04:24.404	IT1	3.233	8	12.1117
Trial 1	1.3	Rep	M	0:04:24.404-0:04:24.670	IT1	3.38625	8	12.6857
Trial 1	1.3	Rep	M	0:04:24.670-0:04:24.936	IT1	2.64107	8	9.89408
Trial 1	1.3	Rep	M	0:04:24.936-0:04:25.202	IT1	3.51792	8	13.179
Trial 1	1.3	Rep	M	0:04:25.202-0:04:25.468	IT1	0.881687	8	3.30302
Trial 1	1.3	Rep	M	0:04:25.468-0:04:25.734	IT1	0.170448	8	0.638541
Trial 1	1.3	Rep	M	0:04:25.734-0:04:26.000	IT1	0.316077	8	1.1841
Trial 1	1.3	Rep	M	0:04:26.000-0:04:26.266	IT1	0.211102	7	0.903822
Trial 1	1.3	Rep	M	0:04:26.266-0:04:26.532	IT1	0.268203	8	1.00475
Trial 1	1.3	Rep	M	0:04:26.532-0:04:26.798	IT1	0.586851	8	2.1985
Trial 1	1.3	Rep	M	0:04:26.798-0:04:27.064	IT1	0.286175	8	1.07209
Trial 1	1.3	Rep	M	0:04:27.064-0:04:27.330	IT1	0.310264	8	1.16233
Trial 1	1.3	Rep	M	0:04:27.330-0:04:27.596	IT1	0.191701	8	0.718159
Trial 1	1.3	Rep	M	0:04:27.596-0:04:27.862	IT1	0.970786	8	3.63682
Trial 1	1.3	Rep	M	0:04:27.862-0:04:28.128	IT1	3.01492	8	11.2946
Trial 1	1.3	Rep	M	0:04:28.128-0:04:28.394	IT1	2.14275	8	8.02727
Trial 1	1.3	Rep	M	0:04:28.394-0:04:28.660	IT1	0.73745	8	2.76269
Trial 1	1.3	Rep	M	0:04:28.660-0:04:28.926	IT1	0.443618	8	1.6619
Trial 1	1.3	Rep	M	0:04:28.926-0:04:29.192	IT1	1.28097	8	4.79887
Trial 1	1.3	Rep	M	0:04:29.192-0:04:29.458	IT1	2.50063	8	9.36796
Trial 1	1.3	Rep	M	0:04:29.458-0:04:29.724	IT1	0.966077	8	3.61916
Trial 1	1.3	Rep	M	0:04:29.724-0:04:29.990	IT1	1.28042	8	4.79677
Trial 1	1.3	Rep	M	0:04:29.990-0:04:30.256	IT1	2.80921	8	10.524
Trial 1	1.3	Rep	M	0:04:30.256-0:04:30.522	IT1	4.82883	8	18.09
Trial 1	1.3	Rep	M	0:04:30.522-0:04:30.788	IT1	3.7361	8	13.9963
Trial 1	1.3	Rep	M	0:04:30.788-0:04:31.054	IT1	0.988041	8	3.70145
Trial 1	1.3	Rep	M	0:04:31.054-0:04:31.320	IT1	1.11726	8	4.18556
Trial 1	1.3	Rep	M	0:04:31.320-0:04:31.586	IT1	1.50828	8	5.65039
Trial 1	1.3	Rep	M	0:04:31.586-0:04:31.852	IT1	2.24218	8	8.39979
Trial 1	1.3	Rep	M	0:04:31.852-0:04:32.118	IT1	1.78012	8	6.66876
Trial 1	1.3	Rep	M	0:04:32.118-0:04:32.384	IT1	2.13054	8	7.98153
Trial 1	1.3	Rep	M	0:04:32.384-0:04:32.650	IT1	1.04714	8	3.92285
Trial 1	1.3	Rep	M	0:04:32.650-0:04:32.916	IT1	1.04508	8	3.91512
Trial 1	1.3	Rep	M	0:04:32.916-0:04:33.182	IT1	0.580284	8	2.1739
Trial 1	1.3	Rep	M	0:04:33.182-0:04:33.448	IT1	0.291114	8	1.09059
Trial 1	1.3	Rep	M	0:04:33.448-0:04:33.714	IT1	0.163147	8	0.611189
Trial 1	1.3	Rep	M	0:04:33.714-0:04:33.980	IT1	0.474196	8	1.77646
Trial 1	1.3	Rep	M	0:04:33.980-0:04:34.246	IT1	0.669599	8	2.50848
Trial 1	1.3	Rep	M	0:04:34.246-0:04:34.512	IT1	1.11562	8	4.1794
Trial 1	1.3	Rep	M	0:04:34.512-0:04:34.778	IT1	0.608098	8	2.27808
Trial 1	1.3	Rep	M	0:04:34.778-0:04:35.044	IT1	0.187761	8	0.703399
Trial 1	1.3	Rep	M	0:04:35.044-0:04:35.310	IT1	0.200415	8	0.750814
Trial 1	1.3	Rep	M	0:04:35.310-0:04:35.576	IT1	0.070682	8	0.264792
Trial 1	1.3	Rep	M	0:04:35.576-0:04:35.842	IT1	0.0801902	7	0.343326
Trial 1	1.3	Rep	M	0:04:35.842-0:04:36.108	IT1	0.365298	8	1.36851
Trial 1	1.3	Rep	M	0:04:36.108-0:04:36.374	IT1	0.82861	8	3.10417
Trial 1	1.3	Rep	M	0:04:36.374-0:04:36.640	IT1	0.378527	8	1.41805
Trial 1	1.3	Rep	M	0:04:36.640-0:04:36.906	IT1	0.814429	8	3.05106
Trial 1	1.3	Rep	M	0:04:36.906-0:04:37.172	IT1	0.314567	8	1.17844
Trial 1	1.3	Rep	M	0:04:37.172-0:04:37.438	IT1	0.881955	8	3.30403
Trial 1	1.3	Rep	M	0:04:37.438-0:04:37.704	IT1	1.76297	8	6.60453
Trial 1	1.3	Rep	M	0:04:37.704-0:04:37.970	IT1	1.01106	8	3.78766
Trial 1	1.3	Rep	M	0:04:37.970-0:04:38.236	IT1	1.61206	8	6.03922
Trial 1	1.3	Rep	M	0:04:38.236-0:04:38.502	IT1	3.12572	8	11.7097
Trial 1	1.3	Rep	M	0:04:38.502-0:04:38.768	IT1	4.27054	8	15.9985
Trial 1	1.3	Rep	M	0:04:38.768-0:04:39.034	IT1	4.78071	8	17.9097
Trial 1	1.3	Rep	M	0:04:39.034-0:04:39.300	IT1	2.53105	8	9.48193
Trial 1	1.3	Rep	M	0:04:39.300-0:04:39.566	IT1	0.953087	8	3.57051
Trial 1	1.3	Rep	M	0:04:39.566-0:04:39.832	IT1	0.911278	8	3.41387
Trial 1	1.3	Rep	M	0:04:39.832-0:04:40.098	IT1	0.510569	8	1.91273
Trial 1	1.3	Rep	M	0:04:40.098-0:04:40.364	IT1	1.22267	8	4.58042
Trial 1	1.3	Rep	M	0:04:40.364-0:04:40.630	IT1	1.14867	8	4.30321
Trial 1	1.3	Rep	M	0:04:40.630-0:04:40.896	IT1	0.527502	8	1.97616
Trial 1	1.3	Rep	M	0:04:40.896-0:04:41.162	IT1	0.178276	8	0.667863
Trial 1	1.3	Rep	M	0:04:41.162-0:04:41.428	IT1	0.566265	8	2.12138
Trial 1	1.3	Rep	M	0:04:41.428-0:04:41.694	IT1	2.18248	8	8.17613
Trial 1	1.3	Rep	M	0:04:41.694-0:04:41.960	IT1	1.59065	8	5.95896
Trial 1	1.3	Rep	M	0:04:41.960-0:04:42.226	IT1	1.79125	8	6.71047
Trial 1	1.3	Rep	M	0:04:42.226-0:04:42.492	IT1	1.8248	8	6.83616
Trial 1	1.3	Rep	M	0:04:42.492-0:04:42.758	IT1	0.820176	8	3.07258
Trial 1	1.3	Rep	M	0:04:42.758-0:04:43.024	IT1	0.503754	8	1.88719
Trial 1	1.3	Rep	M	0:04:43.024-0:04:43.290	IT1	0.407535	8	1.52673
Trial 1	1.3	Rep	M	0:04:43.290-0:04:43.556	IT1	0.29855	8	1.11844
Trial 1	1.3	Rep	M	0:04:43.556-0:04:43.822	IT1	0.199964	8	0.749114
Trial 1	1.3	Rep	M	0:04:43.822-0:04:44.088	IT1	0.125716	8	0.470969
Trial 1	1.3	Rep	M	0:04:44.088-0:04:44.354	IT1	0.145639	8	0.5456
Trial 1	1.3	Rep	M	0:04:44.354-0:04:44.620	IT1	0.137121	8	0.513691
Trial 1	1.3	Rep	M	0:04:44.620-0:04:44.886	IT1	0.467115	8	1.74994
Trial 1	1.3	Rep	M	0:04:44.886-0:04:45.152	IT1	0.694325	8	2.60111
Trial 1	1.3	Rep	M	0:04:45.152-0:04:45.418	IT1	0.363882	7	1.55793
Trial 1	1.3	Rep	M	0:04:45.418-0:04:45.684	IT1	0.40794	8	1.52825
Trial 1	1.3	Rep	M	0:04:45.684-0:04:45.950	IT1	0.168599	8	0.631611
Trial 1	1.3	Rep	M	0:04:45.950-0:04:46.216	IT1	0.260703	8	0.976664
Trial 1	1.3	Rep	M	0:04:46.216-0:04:46.482	IT1	1.24728	8	4.6726
Trial 1	1.3	Rep	M	0:04:46.482-0:04:46.748	IT1	0.287398	8	1.07667
Trial 1	1.3	Rep	M	0:04:46.748-0:04:47.014	IT1	0.439065	8	1.64485
Trial 1	1.3	Rep	M	0:04:47.014-0:04:47.280	IT1	0.636545	8	2.38465
Trial 1	1.3	Rep	M	0:04:47.280-0:04:47.546	IT1	0.269683	8	1.0103
Trial 1	1.3	Rep	M	0:04:47.546-0:04:47.812	IT1	0.194667	8	0.72927
Trial 1	1.3	Rep	M	0:04:47.812-0:04:48.078	IT1	0.296242	8	1.10979
Trial 1	1.3	Rep	M	0:04:48.078-0:04:48.344	IT1	0.997017	8	3.73508
Trial 1	1.3	Rep	M	0:04:48.344-0:04:48.610	IT1	2.06653	8	7.74172
Trial 1	1.3	Rep	M	0:04:48.610-0:04:48.876	IT1	2.66263	8	9.97492
Trial 1	1.3	Rep	M	0:04:48.876-0:04:49.142	IT1	2.52108	8	9.44459
Trial 1	1.3	Rep	M	0:04:49.142-0:04:49.408	IT1	1.08521	8	4.06548
Trial 1	1.3	Rep	M	0:04:49.408-0:04:49.674	IT1	0.699131	8	2.61912
Trial 1	1.3	Rep	M	0:04:49.674-0:04:49.940	IT1	0.439138	8	1.64513
Trial 1	1.3	Rep	M	0:04:49.940-0:04:50.206	IT1	0.283135	8	1.0607
Trial 1	1.3	Rep	M	0:04:50.206-0:04:50.472	IT1	0.0962505	8	0.360579
Trial 1	1.3	Rep	M	0:04:50.472-0:04:50.738	IT1	0.976686	8	3.6589
Trial 1	1.3	Rep	M	0:04:50.738-0:04:51.004	IT1	1.09654	8	4.10793
Trial 1	1.3	Rep	M	0:04:51.004-0:04:51.270	IT1	0.452889	8	1.69663
Trial 1	1.3	Rep	M	0:04:51.270-0:04:51.536	IT1	0.453638	8	1.69945
Trial 1	1.3	Rep	M	0:04:51.536-0:04:51.802	IT1	0.666102	8	2.49538
Trial 1	1.3	Rep	M	0:04:51.802-0:04:52.068	IT1	0.647181	8	2.4245
Trial 1	1.3	Rep	M	0:04:52.068-0:04:52.334	IT1	0.29252	8	1.09586
Trial 1	1.3	Rep	M	0:04:52.334-0:04:52.600	IT1	0.0897296	8	0.336149
Trial 1	1.3	Rep	M	0:04:52.600-0:04:52.866	IT1	0.279826	8	1.0483
Trial 1	1.3	Rep	M	0:04:52.866-0:04:53.132	IT1	1.00225	8	3.75469
Trial 1	1.3	Rep	M	0:04:53.132-0:04:53.398	IT1	1.51945	8	5.69223
Trial 1	1.3	Rep	M	0:04:53.398-0:04:53.664	IT1	2.40745	8	9.01891
Trial 1	1.3	Rep	M	0:04:53.664-0:04:53.930	IT1	3.21784	8	12.0548
Trial 1	1.3	Rep	M	0:04:53.930-0:04:54.196	IT1	1.21403	8	4.54806
Trial 1	1.3	Rep	M	0:04:54.196-0:04:54.462	IT1	1.69991	8	6.36828
Trial 1	1.3	Rep	M	0:04:54.462-0:04:54.728	IT1	1.19668	7	5.12353
Trial 1	1.3	Rep	M	0:04:54.728-0:04:54.994	IT1	0.772883	8	2.89541
Trial 1	1.3	Rep	M	0:04:54.994-0:04:55.260	IT1	1.59284	8	5.96714
Trial 1	1.3	Rep	M	0:04:55.260-0:04:55.526	IT1	0.903382	8	3.38427
Trial 1	1.3	Rep	M	0:04:55.526-0:04:55.792	IT1	0.78943	8	2.95739
Trial 1	1.3	Rep	M	0:04:55.792-0:04:56.058	IT1	1.50659	8	5.64405
Trial 1	1.3	Rep	M	0:04:56.058-0:04:56.324	IT1	0.682833	8	2.55807
Trial 1	1.3	Rep	M	0:04:56.324-0:04:56.590	IT1	1.07964	8	4.04464
Trial 1	1.3	Rep	M	0:04:56.590-0:04:56.856	IT1	1.56403	8	5.85921
Trial 1	1.3	Rep	M	0:04:56.856-0:04:57.122	IT1	2.68882	8	10.073
Trial 1	1.3	Rep	M	0:04:57.122-0:04:57.388	IT1	1.77261	8	6.64064
Trial 1	1.3	Rep	M	0:04:57.388-0:04:57.654	IT1	1.90134	8	7.12289
Trial 1	1.3	Rep	M	0:04:57.654-0:04:57.920	IT1	0.654292	8	2.45116
Trial 1	1.3	Rep	M	0:04:57.920-0:04:58.186	IT1	0.547622	8	2.05153
Trial 1	1.3	Rep	M	0:04:58.186-0:04:58.452	IT1	0.39672	8	1.48622
Trial 1	1.3	Rep	M	0:04:58.452-0:04:58.718	IT1	3.23345	8	12.1133
Trial 1	1.3	Rep	M	0:04:58.718-0:04:58.984	IT1	1.23638	8	4.6318
Trial 1	1.3	Rep	M	0:04:58.984-0:04:59.250	IT1	0.932872	8	3.49479
Trial 1	1.3	Rep	M	0:04:59.250-0:04:59.516	IT1	0.623858	8	2.33712
Trial 1	1.3	Rep	M	0:04:59.516-0:04:59.782	IT1	0.568685	8	2.13044
Trial 1	1.3	Rep	M	0:04:59.782-0:05:00.048	IT1	1.65196	8	6.18867
Trial 1	1.3	Rep	M	0:05:00.048-0:05:00.314	IT1	1.79955	8	6.74155
Trial 1	1.3	Rep	M	0:05:00.314-0:05:00.580	IT1	0.541934	8	2.03023
Trial 1	1.3	Rep	M	0:05:00.580-0:05:00.846	IT1	0.363491	8	1.36173
Trial 1	1.3	Rep	M	0:05:00.846-0:05:01.112	IT1	1.28827	8	4.82619
Trial 1	1.3	Rep	M	0:05:01.112-0:05:01.378	IT1	1.12059	8	4.198
Trial 1	1.3	Rep	M	0:05:01.378-0:05:01.644	IT1	0.37844	8	1.41773
Trial 1	1.3	Rep	M	0:05:01.644-0:05:01.910	IT1	0.552019	8	2.068
Trial 1	1.3	Rep	M	0:05:01.910-0:05:02.176	IT1	0.444018	8	1.66341
Trial 1	1.3	Rep	M	0:05:02.176-0:05:02.442	IT1	0.297645	8	1.11506
Trial 1	1.3	Rep	M	0:05:02.442-0:05:02.708	IT1	0.15636	8	0.585763
Trial 1	1.3	Rep	M	0:05:02.708-0:05:02.974	IT1	0.148631	8	0.556808
Trial 1	1.3	Rep	M	0:05:02.974-0:05:03.240	IT1	0.0754741	8	0.282746
Trial 1	1.3	Rep	M	0:05:03.240-0:05:03.506	IT1	0.125395	8	0.469759
Trial 1	1.3	Rep	M	0:05:03.506-0:05:03.772	IT1	0.125782	8	0.471214
Trial 1	1.3	Rep	M	0:05:03.772-0:05:04.038	IT1	0.129762	8	0.486117
Trial 1	1.3	Rep	M	0:05:04.038-0:05:04.304	IT1	0.207915	7	0.890169
Trial 1	1.3	Rep	M	0:05:04.304-0:05:04.570	IT1	0.23986	8	0.898573
Trial 1	1.3	Rep	M	0:05:04.570-0:05:04.836	IT1	0.300164	8	1.1245
Trial 1	1.3	Rep	M	0:05:04.836-0:05:05.102	IT1	0.322687	8	1.20887
Trial 1	1.3	Rep	M	0:05:05.102-0:05:05.368	IT1	0.361987	8	1.3561
Trial 1	1.3	Rep	M	0:05:05.368-0:05:05.634	IT1	0.239629	8	0.89771
Trial 1	1.3	Rep	M	0:05:05.634-0:05:05.900	IT1	0.274524	8	1.02843
Trial 1	1.3	Rep	M	0:05:05.900-0:05:06.166	IT1	0.259966	8	0.973896
Trial 1	1.3	Rep	M	0:05:06.166-0:05:06.432	IT1	0.459218	8	1.72034
Trial 1	1.3	Rep	M	0:05:06.432-0:05:06.698	IT1	0.329245	8	1.23344
Trial 1	1.3	Rep	M	0:05:06.698-0:05:06.964	IT1	0.483865	8	1.81267
Trial 1	1.3	Rep	M	0:05:06.964-0:05:07.230	IT1	0.261386	8	0.97922
Trial 1	1.3	Rep	M	0:05:07.230-0:05:07.496	IT1	0.142711	8	0.53463
Trial 1	1.3	Rep	M	0:05:07.496-0:05:07.762	IT1	0.236778	8	0.88703
Trial 1	1.3	Rep	M	0:05:07.762-0:05:08.028	IT1	0.340838	8	1.27687
Trial 1	1.3	Rep	M	0:05:08.028-0:05:08.294	IT1	0.253177	8	0.948465
Trial 1	1.3	Rep	M	0:05:08.294-0:05:08.560	IT1	0.233377	8	0.874289
Trial 1	1.3	Rep	M	0:05:08.560-0:05:08.826	IT1	0.20084	8	0.752393
Trial 1	1.3	Rep	M	0:05:08.826-0:05:09.092	IT1	0.0693604	8	0.259841
Trial 1	1.3	Rep	M	0:05:09.092-0:05:09.358	IT1	0.0963678	8	0.361019
Trial 1	1.3	Rep	M	0:05:09.358-0:05:09.624	IT1	0.27117	8	1.01587
Trial 1	1.3	Rep	M	0:05:09.624-0:05:09.890	IT1	0.290039	8	1.08656
Trial 1	1.3	Rep	M	0:05:09.890-0:05:10.156	IT1	0.799139	8	2.99377
Trial 1	1.3	Rep	M	0:05:10.156-0:05:10.422	IT1	0.885199	8	3.31618
Trial 1	1.3	Rep	M	0:05:10.422-0:05:10.688	IT1	0.379147	8	1.42039
Trial 1	1.3	Rep	M	0:05:10.688-0:05:10.954	IT1	0.285023	8	1.06777
Trial 1	1.3	Rep	M	0:05:10.954-0:05:11.220	IT1	0.549892	8	2.06004
Trial 1	1.3	Rep	M	0:05:11.220-0:05:11.486	IT1	0.345828	8	1.29555
Trial 1	1.3	Rep	M	0:05:11.486-0:05:11.752	IT1	0.432845	8	1.62154
Trial 1	1.3	Rep	M	0:05:11.752-0:05:12.018	IT1	0.52814	8	1.97855
Trial 1	1.3	Rep	M	0:05:12.018-0:05:12.284	IT1	2.86533	8	10.7342
Trial 1	1.3	Rep	M	0:05:12.284-0:05:12.550	IT1	5.778	8	21.6458
Trial 1	1.3	Rep	M	0:05:12.550-0:05:12.816	IT1	3.36765	8	12.616
Trial 1	1.3	Rep	M	0:05:12.816-0:05:13.082	IT1	0.819089	8	3.0685
Trial 1	1.3	Rep	M	0:05:13.082-0:05:13.348	IT1	3.23836	8	12.1317
Trial 1	1.3	Rep	M	0:05:13.348-0:05:13.614	IT1	3.15471	8	11.8183
Trial 1	1.3	Rep	M	0:05:13.614-0:05:13.880	IT1	2.2199	7	9.50434
Trial 1	1.3	Rep	M	0:05:13.880-0:05:14.146	IT1	0.842079	8	3.15465
Trial 1	1.3	Rep	M	0:05:14.146-0:05:14.412	IT1	0.214885	8	0.805011
Trial 1	1.3	Rep	M	0:05:14.412-0:05:14.678	IT1	0.321937	8	1.20605
Trial 1	1.3	Rep	M	0:05:14.678-0:05:14.944	IT1	0.219315	8	0.82161
Trial 1	1.3	Rep	M	0:05:14.944-0:05:15.210	IT1	1.14176	8	4.27732
Trial 1	1.3	Rep	M	0:05:15.210-0:05:15.476	IT1	0.449711	8	1.68474
Trial 1	1.3	Rep	M	0:05:15.476-0:05:15.742	IT1	0.701971	8	2.62975
Trial 1	1.3	Rep	M	0:05:15.742-0:05:16.008	IT1	0.503814	8	1.88741
Trial 1	1.3	Rep	M	0:05:16.008-0:05:16.274	IT1	0.213616	8	0.800265
Trial 1	1.3	Rep	M	0:05:16.274-0:05:16.540	IT1	0.727047	8	2.7237
Trial 1	1.3	Rep	M	0:05:16.540-0:05:16.806	IT1	0.751556	8	2.81552
Trial 1	1.3	Rep	M	0:05:16.806-0:05:17.072	IT1	0.369645	8	1.38478
Trial 1	1.3	Rep	M	0:05:17.072-0:05:17.338	IT1	1.08722	8	4.07298
Trial 1	1.3	Rep	M	0:05:17.338-0:05:17.604	IT1	1.11144	8	4.16372
Trial 1	1.3	Rep	M	0:05:17.604-0:05:17.870	IT1	1.37195	8	5.13967
Trial 1	1.3	Rep	M	0:05:17.870-0:05:18.136	IT1	0.563439	8	2.11079
Trial 1	1.3	Rep	M	0:05:18.136-0:05:18.402	IT1	0.523672	8	1.9618
Trial 1	1.3	Rep	M	0:05:18.402-0:05:18.668	IT1	0.529048	8	1.98194
Trial 1	1.3	Rep	M	0:05:18.668-0:05:18.934	IT1	0.577308	8	2.16275
Trial 1	1.3	Rep	M	0:05:18.934-0:05:19.200	IT1	0.554184	8	2.0761
Trial 1	1.3	Rep	M	0:05:19.200-0:05:19.466	IT1	2.40216	8	8.99912
Trial 1	1.3	Rep	M	0:05:19.466-0:05:19.732	IT1	2.12819	8	7.9727
Trial 1	1.3	Rep	M	0:05:19.732-0:05:19.998	IT1	0.255823	8	0.958372
Trial 1	1.3	Rep	M	0:05:19.998-0:05:20.264	IT1	0.180109	8	0.674736
Trial 1	1.3	Rep	M	0:05:20.264-0:05:20.530	IT1	0.236918	8	0.887554
Trial 1	1.3	Rep	M	0:05:20.530-0:05:20.796	IT1	0.17443	8	0.653459
Trial 1	1.3	Rep	M	0:05:20.796-0:05:21.062	IT1	0.254006	8	0.95157
Trial 1	1.3	Rep	M	0:05:21.062-0:05:21.328	IT1	0.826694	8	3.09699
Trial 1	1.3	Rep	M	0:05:21.328-0:05:21.594	IT1	1.30677	8	4.8955
Trial 1	1.3	Rep	M	0:05:21.594-0:05:21.860	IT1	0.948367	8	3.5528
Trial 1	1.3	Rep	M	0:05:21.860-0:05:22.126	IT1	0.628456	8	2.35437
Trial 1	1.3	Rep	M	0:05:22.126-0:05:22.392	IT1	1.21683	8	4.55856
Trial 1	1.3	Rep	M	0:05:22.392-0:05:22.658	IT1	0.671457	8	2.51542
Trial 1	1.3	Rep	M	0:05:22.658-0:05:22.924	IT1	0.799156	8	2.99385
Trial 1	1.3	Rep	M	0:05:22.924-0:05:23.190	IT1	1.08318	8	4.05785
Trial 1	1.3	Rep	M	0:05:23.190-0:05:23.456	IT1	1.72946	7	7.40456
Trial 1	1.3	Rep	M	0:05:23.456-0:05:23.722	IT1	1.16301	8	4.35695
Trial 1	1.3	Rep	M	0:05:23.722-0:05:23.988	IT1	1.09757	8	4.11175
Trial 1	1.3	Rep	M	0:05:23.988-0:05:24.254	IT1	0.650275	8	2.4361
Trial 1	1.3	Rep	M	0:05:24.254-0:05:24.520	IT1	3.57456	8	13.3911
Trial 1	1.3	Rep	M	0:05:24.520-0:05:24.786	IT1	2.68403	8	10.055
Trial 1	1.3	Rep	M	0:05:24.786-0:05:25.052	IT1	3.55641	8	13.3232
Trial 1	1.3	Rep	M	0:05:25.052-0:05:25.318	IT1	2.66646	8	9.98922
Trial 1	1.3	Rep	M	0:05:25.318-0:05:25.584	IT1	1.10676	8	4.14621
Trial 1	1.3	Rep	M	0:05:25.584-0:05:25.850	IT1	0.645647	8	2.41875
Trial 1	1.3	Rep	M	0:05:25.850-0:05:26.116	IT1	0.194925	8	0.730236
Trial 1	1.3	Rep	M	0:05:26.116-0:05:26.382	IT1	0.0636637	8	0.2385
Trial 1	1.3	Rep	M	0:05:26.382-0:05:26.648	IT1	0.0575681	8	0.215663
Trial 1	1.3	Rep	M	0:05:26.648-0:05:26.914	IT1	0.297498	8	1.11451
Trial 1	1.3	Rep	M	0:05:26.914-0:05:27.180	IT1	0.404156	8	1.51407
Trial 1	1.3	Rep	M	0:05:27.180-0:05:27.446	IT1	1.1106	8	4.16059
Trial 1	1.3	Rep	M	0:05:27.446-0:05:27.712	IT1	1.31127	8	4.91236
Trial 1	1.3	Rep	M	0:05:27.712-0:05:27.978	IT1	0.692208	8	2.59318
Trial 1	1.3	Rep	M	0:05:27.978-0:05:28.244	IT1	0.435685	8	1.63219
Trial 1	1.3	Rep	M	0:05:28.244-0:05:28.510	IT1	0.394127	8	1.4765
Trial 1	1.3	Rep	M	0:05:28.510-0:05:28.776	IT1	2.37355	8	8.89191
Trial 1	1.3	Rep	M	0:05:28.776-0:05:29.042	IT1	3.05545	8	11.4465
Trial 1	1.3	Rep	M	0:05:29.042-0:05:29.308	IT1	0.842087	8	3.15466
Trial 1	1.3	Rep	M	0:05:29.308-0:05:29.574	IT1	0.313084	8	1.17289
Trial 1	1.3	Rep	M	0:05:29.574-0:05:29.840	IT1	0.378804	8	1.41909
Trial 1	1.3	Rep	M	0:05:29.840-0:05:30.106	IT1	0.732106	8	2.74265
Trial 1	1.3	Rep	M	0:05:30.106-0:05:30.372	IT1	0.698436	8	2.61653
Trial 1	1.3	Rep	M	0:05:30.372-0:05:30.638	IT1	0.286346	8	1.07272
Trial 1	1.3	Rep	M	0:05:30.638-0:05:30.904	IT1	0.208159	8	0.779815
Trial 1	1.3	Rep	M	0:05:30.904-0:05:31.170	IT1	0.0527001	8	0.197427
Trial 1	1.3	Rep	M	0:05:31.170-0:05:31.436	IT1	0.0267697	8	0.100286
Trial 1	1.3	Rep	M	0:05:31.436-0:05:31.702	IT1	0.113158	8	0.423918
Trial 1	1.3	Rep	M	0:05:31.702-0:05:31.968	IT1	0.340503	8	1.2756
Trial 1	1.3	Rep	M	0:05:31.968-0:05:32.234	IT1	1.02943	8	3.8565
Trial 1	1.3	Rep	M	0:05:32.234-0:05:32.500	IT1	1.4786	8	5.53924
Trial 1	1.3	Rep	M	0:05:32.500-0:05:32.766	IT1	1.68833	7	7.22845
Trial 1	1.3	Rep	M	0:05:32.766-0:05:33.032	IT1	2.13505	8	7.99845
Trial 1	1.3	Rep	M	0:05:33.032-0:05:33.298	IT1	1.68363	8	6.3073
Trial 1	1.3	Rep	M	0:05:33.298-0:05:33.564	IT1	2.2935	8	8.592
Trial 1	1.3	Rep	M	0:05:33.564-0:05:33.830	IT1	2.92065	8	10.9415
Trial 1	1.3	Rep	M	0:05:33.830-0:05:34.096	IT1	3.25059	8	12.1775
Trial 1	1.3	Rep	M	0:05:34.096-0:05:34.362	IT1	2.40212	8	8.99892
Trial 1	1.3	Rep	M	0:05:34.362-0:05:34.628	IT1	1.1395	8	4.26885
Trial 1	1.3	Rep	M	0:05:34.628-0:05:34.894	IT1	1.54486	8	5.78741
Trial 1	1.3	Rep	M	0:05:34.894-0:05:35.160	IT1	1.25145	8	4.68824
Trial 1	1.3	Rep	M	0:05:35.160-0:05:35.426	IT1	0.643998	8	2.41258
Trial 1	1.3	Rep	M	0:05:35.426-0:05:35.692	IT1	0.446856	8	1.67403
Trial 1	1.3	Rep	M	0:05:35.692-0:05:35.958	IT1	1.1767	8	4.40821
Trial 1	1.3	Rep	M	0:05:35.958-0:05:36.224	IT1	2.62631	8	9.83879
Trial 1	1.3	Rep	M	0:05:36.224-0:05:36.490	IT1	2.81109	8	10.5311
Trial 1	1.3	Rep	M	0:05:36.490-0:05:36.756	IT1	3.64485	8	13.6545
Trial 1	1.3	Rep	M	0:05:36.756-0:05:37.022	IT1	3.60766	8	13.5152
Trial 1	1.3	Rep	M	0:05:37.022-0:05:37.288	IT1	2.25151	8	8.43473
Trial 1	1.3	Rep	M	0:05:37.288-0:05:37.554	IT1	2.79033	8	10.4532
Trial 1	1.3	Rep	M	0:05:37.554-0:05:37.820	IT1	3.27968	8	12.2866
Trial 1	1.3	Rep	M	0:05:37.820-0:05:38.086	IT1	2.57657	8	9.65247
Trial 1	1.3	Rep	M	0:05:38.086-0:05:38.352	IT1	1.56704	8	5.87053
Trial 1	1.3	Rep	M	0:05:38.352-0:05:38.618	IT1	0.374238	8	1.40199
Trial 1	1.3	Rep	M	0:05:38.618-0:05:38.884	IT1	1.57467	8	5.89909
Trial 1	1.3	Rep	M	0:05:38.884-0:05:39.150	IT1	1.67161	8	6.2623
Trial 1	1.3	Rep	M	0:05:39.150-0:05:39.416	IT1	0.882149	8	3.30474
Trial 1	1.3	Rep	M	0:05:39.416-0:05:39.682	IT1	0.254824	8	0.954629
Trial 1	1.3	Rep	M	0:05:39.682-0:05:39.948	IT1	0.368479	8	1.38041
Trial 1	1.3	Rep	M	0:05:39.948-0:05:40.214	IT1	1.49909	8	5.61596
Trial 1	1.3	Rep	M	0:05:40.214-0:05:40.480	IT1	1.66885	8	6.25193
Trial 1	1.3	Rep	M	0:05:40.480-0:05:40.746	IT1	0.523977	8	1.96294
Trial 1	1.3	Rep	M	0:05:40.746-0:05:41.012	IT1	0.301916	8	1.13105
Trial 1	1.3	Rep	M	0:05:41.012-0:05:41.278	IT1	0.292746	8	1.0967
Trial 1	1.3	Rep	M	0:05:41.278-0:05:41.544	IT1	0.212636	8	0.796586
Trial 1	1.3	Rep	M	0:05:41.544-0:05:41.810	IT1	0.0977861	8	0.366332
Trial 1	1.3	Rep	M	0:05:41.810-0:05:42.076	IT1	0.0892398	8	0.334314
Trial 1	1.3	Rep	M	0:05:42.076-0:05:42.342	IT1	0.264297	7	1.13157
Trial 1	1.3	Rep	M	0:05:42.342-0:05:42.608	IT1	2.57056	8	9.62997
Trial 1	1.3	Rep	M	0:05:42.608-0:05:42.874	IT1	1.64039	8	6.14528
Trial 1	1.3	Rep	M	0:05:42.874-0:05:43.140	IT1	0.848296	8	3.17793
Trial 1	1.3	Rep	M	0:05:43.140-0:05:43.406	IT1	1.73144	8	6.48645
Trial 1	1.3	Rep	M	0:05:43.406-0:05:43.672	IT1	1.0376	8	3.88712
Trial 1	1.3	Rep	M	0:05:43.672-0:05:43.938	IT1	0.341862	8	1.2807
Trial 1	1.3	Rep	M	0:05:43.938-0:05:44.204	IT1	0.482221	8	1.80652
Trial 1	1.3	Rep	M	0:05:44.204-0:05:44.470	IT1	0.167925	8	0.629089
Trial 1	1.3	Rep	M	0:05:44.470-0:05:44.736	IT1	0.0484136	8	0.18137
Trial 1	1.3	Rep	M	0:05:44.736-0:05:45.002	IT1	0.102761	8	0.384969
Trial 1	1.3	Rep	M	0:05:45.002-0:05:45.268	IT1	0.0366771	8	0.137402
Trial 1	1.3	Rep	M	0:05:45.268-0:05:45.534	IT1	0.276263	8	1.03495
Trial 1	1.3	Rep	M	0:05:45.534-0:05:45.800	IT1	0.549681	8	2.05924
Trial 1	1.3	Rep	M	0:05:45.800-0:05:46.066	IT1	0.590528	8	2.21228
Trial 1	1.3	Rep	M	0:05:46.066-0:05:46.332	IT1	0.962315	8	3.60507
Trial 1	1.3	Rep	M	0:05:46.332-0:05:46.598	IT1	0.314019	8	1.17639
Trial 1	1.3	Rep	M	0:05:46.598-0:05:46.864	IT1	0.0827463	8	0.309987
Trial 1	1.3	Rep	M	0:05:46.864-0:05:47.130	IT1	0.0490454	8	0.183736
Trial 1	1.3	Rep	M	0:05:47.130-0:05:47.396	IT1	0.29395	8	1.10121
Trial 1	1.3	Rep	M	0:05:47.396-0:05:47.662	IT1	0.340727	8	1.27645
Trial 1	1.3	Rep	M	0:05:47.662-0:05:47.928	IT1	0.218365	8	0.818049
Trial 1	1.3	Rep	M	0:05:47.928-0:05:48.194	IT1	0.0914376	8	0.342548
Trial 1	1.3	Rep	M	0:05:48.194-0:05:48.460	IT1	0.18152	8	0.68002
Trial 1	1.3	Rep	M	0:05:48.460-0:05:48.726	IT1	0.336666	8	1.26124
Trial 1	1.3	Rep	M	0:05:48.726-0:05:48.992	IT1	0.648753	8	2.43039
Trial 1	1.3	Rep	M	0:05:48.992-0:05:49.258	IT1	0.523147	8	1.95985
Trial 1	1.3	Rep	M	0:05:49.258-0:05:49.524	IT1	0.399497	8	1.49661
Trial 1	1.3	Rep	M	0:05:49.524-0:05:49.790	IT1	0.247601	8	0.927571
Trial 1	1.3	Rep	M	0:05:49.790-0:05:50.056	IT1	0.135065	8	0.505985
Trial 1	1.3	Rep	M	0:05:50.056-0:05:50.322	IT1	0.334552	8	1.25332
Trial 1	1.3	Rep	M	0:05:50.322-0:05:50.588	IT1	0.311683	8	1.16764
Trial 1	1.3	Rep	M	0:05:50.588-0:05:50.854	IT1	0.408	8	1.52846
Trial 1	1.3	Rep	M	0:05:50.854-0:05:51.120	IT1	0.276155	8	1.03454
Trial 1	1.3	Rep	M	0:05:51.120-0:05:51.386	IT1	0.176778	8	0.66226
Trial 1	1.3	Rep	M	0:05:51.386-0:05:51.652	IT1	0.108134	8	0.405098
Trial 1	1.3	Rep	M	0:05:51.652-0:05:51.918	IT1	0.553292	7	2.36888
Trial 1	1.3	Rep	M	0:05:51.918-0:05:52.184	IT1	0.372197	8	1.39434
Trial 1	1.3	Rep	M	0:05:52.184-0:05:52.450	IT1	0.0841393	8	0.315206
Trial 1	1.3	Rep	M	0:05:52.450-0:05:52.716	IT1	0.159565	8	0.597768
Trial 1	1.3	Rep	M	0:05:52.716-0:05:52.982	IT1	0.0562316	8	0.210658
Trial 1	1.3	Rep	M	0:05:52.982-0:05:53.248	IT1	0.116249	8	0.435496
Trial 1	1.3	Rep	M	0:05:53.248-0:05:53.514	IT1	0.479374	8	1.79586
Trial 1	1.3	Rep	M	0:05:53.514-0:05:53.780	IT1	0.608508	8	2.27962
Trial 1	1.3	Rep	M	0:05:53.780-0:05:54.046	IT1	1.33085	8	4.98568
Trial 1	1.3	Rep	M	0:05:54.046-0:05:54.312	IT1	0.698649	8	2.61731
Trial 1	1.3	Rep	M	0:05:54.312-0:05:54.578	IT1	0.701497	8	2.62798
Trial 1	1.3	Rep	M	0:05:54.578-0:05:54.844	IT1	0.281875	8	1.05598
Trial 1	1.3	Rep	M	0:05:54.844-0:05:55.110	IT1	0.312917	8	1.17226
Trial 1	1.3	Rep	M	0:05:55.110-0:05:55.376	IT1	0.415355	8	1.55602
Trial 1	1.3	Rep	M	0:05:55.376-0:05:55.642	IT1	0.322911	8	1.20971
Trial 1	1.3	Rep	M	0:05:55.642-0:05:55.908	IT1	0.101966	8	0.381989
Trial 1	1.3	Rep	M	0:05:55.908-0:05:56.174	IT1	0.138664	8	0.519475
Trial 1	1.3	Rep	M	0:05:56.174-0:05:56.440	IT1	0.187547	8	0.702599
Trial 1	1.3	Rep	M	0:05:56.440-0:05:56.706	IT1	0.296241	8	1.10979
Trial 1	1.3	Rep	M	0:05:56.706-0:05:56.972	IT1	0.212486	8	0.796027
Trial 1	1.3	Rep	M	0:05:56.972-0:05:57.238	IT1	0.445896	8	1.67043
Trial 1	1.3	Rep	M	0:05:57.238-0:05:57.504	IT1	0.44241	8	1.65738
Trial 1	1.3	Rep	M	0:05:57.504-0:05:57.770	IT1	0.451687	8	1.69213
Trial 1	1.3	Rep	M	0:05:57.770-0:05:58.036	IT1	0.335454	8	1.2567
Trial 1	1.3	Rep	M	0:05:58.036-0:05:58.302	IT1	0.260103	8	0.974418
Trial 1	1.3	Rep	M	0:05:58.302-0:05:58.568	IT1	0.441799	8	1.65508
Trial 1	1.3	Rep	M	0:05:58.568-0:05:58.834	IT1	0.292287	8	1.09498
Trial 1	1.3	Rep	M	0:05:58.834-0:05:59.100	IT1	0.267869	8	1.00351
Trial 1	1.3	Rep	M	0:05:59.100-0:05:59.366	IT1	0.224493	8	0.841003
Trial 1	1.3	Rep	M	0:05:59.366-0:05:59.632	IT1	0.251047	8	0.940485
Trial 1	1.3	Rep	M	0:05:59.632-0:05:59.898	IT1	0.248167	8	0.929692
Trial 1	1.3	Rep	M	0:05:59.898-0:06:00.164	IT1	0.302942	8	1.1349
Trial 1	1.3	Rep	M	0:06:00.164-0:06:00.430	IT1	0.310838	8	1.16448
Trial 1	1.3	Rep	M	0:06:00.430-0:06:00.696	IT1	0.124658	8	0.466999
Trial 1	1.3	Rep	M	0:06:00.696-0:06:00.962	IT1	0.106725	8	0.399821
Trial 1	1.3	Rep	M	0:06:00.962-0:06:01.228	IT1	0.244533	8	0.916081
Trial 1	1.3	Rep	M	0:06:01.228-0:06:01.494	IT1	0.20141	7	0.862319
Trial 1	1.3	Rep	M	0:06:01.494-0:06:01.760	IT1	0.212156	8	0.794787
Trial 1	1.3	Rep	M	0:06:01.760-0:06:02.026	IT1	0.26776	8	1.00309
Trial 1	1.3	Rep	M	0:06:02.026-0:06:02.292	IT1	2.16107	8	8.09596
Trial 1	1.3	Rep	M	0:06:02.292-0:06:02.558	IT1	3.1068	8	11.6388
Trial 1	1.3	Rep	M	0:06:02.558-0:06:02.824	IT1	4.20763	8	15.7628
Trial 1	1.3	Rep	M	0:06:02.824-0:06:03.090	IT1	3.62929	8	13.5962
Trial 1	1.3	Rep	M	0:06:03.090-0:06:03.356	IT1	1.42296	8	5.33078
Trial 1	1.3	Rep	M	0:06:03.356-0:06:03.622	IT1	0.498765	8	1.8685
Trial 1	1.3	Rep	M	0:06:03.622-0:06:03.888	IT1	0.809325	8	3.03191
Trial 1	1.3	Rep	M	0:06:03.888-0:06:04.154	IT1	1.21852	8	4.56489
Trial 1	1.3	Rep	M	0:06:04.154-0:06:04.420	IT1	0.704704	8	2.64001
Trial 1	1.3	Rep	M	0:06:04.420-0:06:04.686	IT1	0.305703	8	1.14524
Trial 1	1.3	Rep	M	0:06:04.686-0:06:04.952	IT1	1.10277	8	4.13127
Trial 1	1.3	Rep	M	0:06:04.952-0:06:05.218	IT1	0.844054	8	3.16204
Trial 1	1.3	Rep	M	0:06:05.218-0:06:05.484	IT1	1.18776	8	4.44966
Trial 1	1.3	Rep	M	0:06:05.484-0:06:05.750	IT1	1.63742	8	6.13417
Trial 1	1.3	Rep	M	0:06:05.750-0:06:06.016	IT1	0.466537	8	1.74776
Trial 1	1.3	Rep	M	0:06:06.016-0:06:06.282	IT1	0.594208	8	2.22605
Trial 1	1.3	Rep	M	0:06:06.282-0:06:06.548	IT1	1.05149	8	3.93913
Trial 1	1.3	Rep	M	0:06:06.548-0:06:06.814	IT1	0.79866	8	2.99199
Trial 1	1.3	Rep	M	0:06:06.814-0:06:07.080	IT1	0.483628	8	1.8118
Trial 1	1.3	Rep	M	0:06:07.080-0:06:07.346	IT1	0.295258	8	1.10611
Trial 1	1.3	Rep	M	0:06:07.346-0:06:07.612	IT1	0.308856	8	1.15705
Trial 1	1.3	Rep	M	0:06:07.612-0:06:07.878	IT1	0.449436	8	1.6837
Trial 1	1.3	Rep	M	0:06:07.878-0:06:08.144	IT1	2.33752	8	8.75694
Trial 1	1.3	Rep	M	0:06:08.144-0:06:08.410	IT1	3.35991	8	12.5871
Trial 1	1.3	Rep	M	0:06:08.410-0:06:08.676	IT1	3.20381	8	12.0023
Trial 1	1.3	Rep	M	0:06:08.676-0:06:08.942	IT1	3.08675	8	11.5638
Trial 1	1.3	Rep	M	0:06:08.942-0:06:09.208	IT1	2.71808	8	10.1826
Trial 1	1.3	Rep	M	0:06:09.208-0:06:09.474	IT1	1.99206	8	7.46276
Trial 1	1.3	Rep	M	0:06:09.474-0:06:09.740	IT1	0.913258	8	3.4213
Trial 1	1.3	Rep	M	0:06:09.740-0:06:10.006	IT1	0.335294	8	1.25609
Trial 1	1.3	Rep	M	0:06:10.006-0:06:10.272	IT1	0.366075	8	1.37142
Trial 1	1.3	Rep	M	0:06:10.272-0:06:10.538	IT1	1.48915	8	5.57873
Trial 1	1.3	Rep	M	0:06:10.538-0:06:10.804	IT1	1.18699	7	5.08203
Trial 1	1.3	Rep	M	0:06:10.804-0:06:11.070	IT1	1.18206	8	4.42829
Trial 1	1.3	Rep	M	0:06:11.070-0:06:11.336	IT1	1.21433	8	4.54921
Trial 1	1.3	Rep	M	0:06:11.336-0:06:11.602	IT1	0.845205	8	3.16634
Trial 1	1.3	Rep	M	0:06:11.602-0:06:11.868	IT1	0.371108	8	1.39027
Trial 1	1.3	Rep	M	0:06:11.868-0:06:12.134	IT1	1.12871	8	4.22843
Trial 1	1.3	Rep	M	0:06:12.134-0:06:12.400	IT1	2.88402	8	10.8042
Trial 1	1.3	Rep	M	0:06:12.400-0:06:12.666	IT1	4.35888	8	16.3295
Trial 1	1.3	Rep	M	0:06:12.666-0:06:12.932	IT1	3.47301	8	13.0107
Trial 1	1.3	Rep	M	0:06:12.932-0:06:13.198	IT1	0.817826	8	3.0638
Trial 1	1.3	Rep	M	0:06:13.198-0:06:13.464	IT1	0.687421	8	2.57524
Trial 1	1.3	Rep	M	0:06:13.464-0:06:13.730	IT1	0.754245	8	2.82557
Trial 1	1.3	Rep	M	0:06:13.730-0:06:13.996	IT1	2.27528	8	8.52378
Trial 1	1.3	Rep	M	0:06:13.996-0:06:14.262	IT1	0.945134	8	3.5407
Trial 1	1.3	Rep	M	0:06:14.262-0:06:14.528	IT1	0.222686	8	0.834241
Trial 1	1.3	Rep	M	0:06:14.528-0:06:14.794	IT1	0.231579	8	0.867554
Trial 1	1.3	Rep	M	0:06:14.794-0:06:15.060	IT1	0.63385	8	2.37457
Trial 1	1.3	Rep	M	0:06:15.060-0:06:15.326	IT1	0.928184	8	3.47722
Trial 1	1.3	Rep	M	0:06:15.326-0:06:15.592	IT1	1.34231	8	5.02862
Trial 1	1.3	Rep	M	0:06:15.592-0:06:15.858	IT1	0.70154	8	2.62815
Trial 1	1.3	Rep	M	0:06:15.858-0:06:16.124	IT1	0.456717	8	1.71098
Trial 1	1.3	Rep	M	0:06:16.124-0:06:16.390	IT1	0.221902	8	0.8313
Trial 1	1.3	Rep	M	0:06:16.390-0:06:16.656	IT1	0.212195	8	0.794933
Trial 1	1.3	Rep	M	0:06:16.656-0:06:16.922	IT1	0.869177	8	3.25615
Trial 1	1.3	Rep	M	0:06:16.922-0:06:17.188	IT1	0.732942	8	2.7458
Trial 1	1.3	Rep	M	0:06:17.188-0:06:17.454	IT1	3.16277	8	11.8485
Trial 1	1.3	Rep	M	0:06:17.454-0:06:17.720	IT1	4.01184	8	15.0293
Trial 1	1.3	Rep	M	0:06:17.720-0:06:17.986	IT1	4.21341	8	15.7845
Trial 1	1.3	Rep	M	0:06:17.986-0:06:18.252	IT1	4.03535	8	15.1174
Trial 1	1.3	Rep	M	0:06:18.252-0:06:18.518	IT1	1.69392	8	6.34585
Trial 1	1.3	Rep	M	0:06:18.518-0:06:18.784	IT1	1.46425	8	5.48544
Trial 1	1.3	Rep	M	0:06:18.784-0:06:19.050	IT1	1.00138	8	3.75144
Trial 1	1.3	Rep	M	0:06:19.050-0:06:19.316	IT1	1.34703	8	5.04634
Trial 1	1.3	Rep	M	0:06:19.316-0:06:19.582	IT1	0.560776	8	2.1008
Trial 1	1.3	Rep	M	0:06:19.582-0:06:19.848	IT1	0.905824	8	3.39345
Trial 1	1.3	Rep	M	0:06:19.848-0:06:20.114	IT1	0.272278	8	1.02002
Trial 1	1.3	Rep	M	0:06:20.114-0:06:20.380	IT1	0.239806	7	1.02672
Trial 1	1.3	Rep	M	0:06:20.380-0:06:20.646	IT1	0.397098	8	1.48764
Trial 1	1.3	Rep	M	0:06:20.646-0:06:20.912	IT1	0.281004	8	1.05271
Trial 1	1.3	Rep	M	0:06:20.912-0:06:21.178	IT1	0.340666	8	1.27622
Trial 1	1.3	Rep	M	0:06:21.178-0:06:21.444	IT1	2.24497	8	8.41024
Trial 1	1.3	Rep	M	0:06:21.444-0:06:21.710	IT1	4.38417	8	16.4242
Trial 1	1.3	Rep	M	0:06:21.710-0:06:21.976	IT1	3.91384	8	14.6622
Trial 1	1.3	Rep	M	0:06:21.976-0:06:22.242	IT1	4.15245	8	15.5561
Trial 1	1.3	Rep	M	0:06:22.242-0:06:22.508	IT1	5.01136	8	18.7738
Trial 1	1.3	Rep	M	0:06:22.508-0:06:22.774	IT1	1.92788	8	7.22232
Trial 1	1.3	Rep	M	0:06:22.774-0:06:23.040	IT1	0.362348	8	1.35744
Trial 1	1.3	Rep	M	0:06:23.040-0:06:23.306	IT1	0.732399	8	2.74375
Trial 1	1.3	Rep	M	0:06:23.306-0:06:23.572	IT1	0.687048	8	2.57386
Trial 1	1.3	Rep	M	0:06:23.572-0:06:23.838	IT1	0.910223	8	3.40992
Trial 1	1.3	Rep	M	0:06:23.838-0:06:24.104	IT1	0.784696	8	2.93967
Trial 1	1.3	Rep	M	0:06:24.104-0:06:24.370	IT1	0.976907	8	3.65973
Trial 1	1.3	Rep	M	0:06:24.370-0:06:24.636	IT1	0.521343	8	1.95309
Trial 1	1.3	Rep	M	0:06:24.636-0:06:24.902	IT1	1.12509	8	4.21488
Trial 1	1.3	Rep	M	0:06:24.902-0:06:25.168	IT1	0.821861	8	3.07889
Trial 1	1.3	Rep	M	0:06:25.168-0:06:25.434	IT1	0.621966	8	2.33005
Trial 1	1.3	Rep	M	0:06:25.434-0:06:25.700	IT1	0.473896	8	1.77534
Trial 1	1.3	Rep	M	0:06:25.700-0:06:25.966	IT1	0.746526	8	2.79667
Trial 1	1.3	Rep	M	0:06:25.966-0:06:26.232	IT1	0.806143	8	3.02001
Trial 1	1.3	Rep	M	0:06:26.232-0:06:26.498	IT1	0.663842	8	2.48691
Trial 1	1.3	Rep	M	0:06:26.498-0:06:26.764	IT1	0.564468	8	2.11464
Trial 1	1.3	Rep	M	0:06:26.764-0:06:27.030	IT1	0.593575	8	2.22368
Trial 1	1.3	Rep	M	0:06:27.030-0:06:27.296	IT1	0.763515	8	2.86033
Trial 1	1.3	Rep	M	0:06:27.296-0:06:27.562	IT1	0.78719	8	2.949
Trial 1	1.3	Rep	M	0:06:27.562-0:06:27.828	IT1	0.551457	8	2.06589
Trial 1	1.3	Rep	M	0:06:27.828-0:06:28.094	IT1	0.445305	8	1.66822
Trial 1	1.3	Rep	M	0:06:28.094-0:06:28.360	IT1	0.828428	8	3.10348
Trial 1	1.3	Rep	M	0:06:28.360-0:06:28.626	IT1	1.92006	8	7.19305
Trial 1	1.3	Rep	M	0:06:28.626-0:06:28.892	IT1	0.354679	8	1.32871
Trial 1	1.3	Rep	M	0:06:28.892-0:06:29.158	IT1	0.114208	8	0.427852
Trial 1	1.3	Rep	M	0:06:29.158-0:06:29.424	IT1	1.22172	8	4.57689
Trial 1	1.3	Rep	M	0:06:29.424-0:06:29.690	IT1	4.26045	8	15.9607
Trial 1	1.3	Rep	M	0:06:29.690-0:06:29.956	IT1	3.73176	7	15.9773
Trial 1	1.3	Rep	M	0:06:29.956-0:06:30.222	IT1	1.03403	8	3.87374
Trial 1	1.3	Rep	M	0:06:30.222-0:06:30.488	IT1	0.881226	8	3.30129
Trial 1	1.3	Rep	M	0:06:30.488-0:06:30.754	IT1	0.641375	8	2.40274
Trial 1	1.3	Rep	M	0:06:30.754-0:06:31.020	IT1	0.880114	8	3.29713
Trial 1	1.3	Rep	M	0:06:31.020-0:06:31.286	IT1	0.944689	8	3.53904
Trial 1	1.3	Rep	M	0:06:31.286-0:06:31.552	IT1	0.476104	8	1.78361
Trial 1	1.3	Rep	M	0:06:31.552-0:06:31.818	IT1	0.282765	8	1.05931
Trial 1	1.3	Rep	M	0:06:31.818-0:06:32.084	IT1	1.42721	8	5.34665
Trial 1	1.3	Rep	M	0:06:32.084-0:06:32.350	IT1	3.94887	8	14.7935
Trial 1	1.3	Rep	M	0:06:32.350-0:06:32.616	IT1	3.48879	8	13.0699
Trial 1	1.3	Rep	M	0:06:32.616-0:06:32.882	IT1	3.40454	8	12.7543
Trial 1	1.3	Rep	M	0:06:32.882-0:06:33.148	IT1	2.92741	8	10.9668
Trial 1	1.3	Rep	M	0:06:33.148-0:06:33.414	IT1	0.72789	8	2.72685
Trial 1	1.3	Rep	M	0:06:33.414-0:06:33.680	IT1	0.26735	8	1.00156
Trial 1	1.3	Rep	M	0:06:33.680-0:06:33.946	IT1	0.518121	8	1.94101
Trial 1	1.3	Rep	M	0:06:33.946-0:06:34.212	IT1	0.553751	8	2.07449
Trial 1	1.3	Rep	M	0:06:34.212-0:06:34.478	IT1	0.446321	8	1.67204
Trial 1	1.3	Rep	M	0:06:34.478-0:06:34.744	IT1	1.5404	8	5.77073
Trial 1	1.3	Rep	M	0:06:34.744-0:06:35.010	IT1	0.922133	8	3.45456
Trial 1	1.3	Rep	M	0:06:35.010-0:06:35.276	IT1	0.415536	8	1.5567
Trial 1	1.3	Rep	M	0:06:35.276-0:06:35.542	IT1	0.921508	8	3.45221
Trial 1	1.3	Rep	M	0:06:35.542-0:06:35.808	IT1	2.21486	8	8.29742
Trial 1	1.3	Rep	M	0:06:35.808-0:06:36.074	IT1	1.99068	8	7.45757
Trial 1	1.3	Rep	M	0:06:36.074-0:06:36.340	IT1	0.299316	8	1.12131
Trial 1	1.3	Rep	M	0:06:36.340-0:06:36.606	IT1	0.221468	8	0.829677
Trial 1	1.3	Rep	M	0:06:36.606-0:06:36.872	IT1	0.335945	8	1.25854
Trial 1	1.3	Rep	M	0:06:36.872-0:06:37.138	IT1	0.332601	8	1.246
Trial 1	1.3	Rep	M	0:06:37.138-0:06:37.404	IT1	1.94938	8	7.30283
Trial 1	1.3	Rep	M	0:06:37.404-0:06:37.670	IT1	2.16497	8	8.11053
Trial 1	1.3	Rep	M	0:06:37.670-0:06:37.936	IT1	3.66654	8	13.7358
Trial 1	1.3	Rep	M	0:06:37.936-0:06:38.202	IT1	2.07254	8	7.76426
Trial 1	1.3	Rep	M	0:06:38.202-0:06:38.468	IT1	1.89891	8	7.1138
Trial 1	1.3	Rep	M	0:06:38.468-0:06:38.734	IT1	1.76022	8	6.59423
Trial 1	1.3	Rep	M	0:06:38.734-0:06:39.000	IT1	0.529915	8	1.98521
Trial 1	1.3	Rep	M	0:06:39.000-0:06:39.266	IT1	0.487183	8	1.8251
Trial 1	1.3	Rep	M	0:06:39.266-0:06:39.532	IT1	0.226904	7	0.971469
Trial 1	1.3	Rep	M	0:06:39.532-0:06:39.798	IT1	0.266804	8	0.99952
Trial 1	1.3	Rep	M	0:06:39.798-0:06:40.064	IT1	0.533927	8	2.00022
Trial 1	1.3	Rep	M	0:06:40.064-0:06:40.330	IT1	0.491295	8	1.84051
Trial 1	1.3	Rep	M	0:06:40.330-0:06:40.596	IT1	0.108018	8	0.404663
Trial 1	1.3	Rep	M	0:06:40.596-0:06:40.862	IT1	0.910269	8	3.41009
Trial 1	1.3	Rep	M	0:06:40.862-0:06:41.128	IT1	2.17646	8	8.1536
Trial 1	1.3	Rep	M	0:06:41.128-0:06:41.394	IT1	2.35195	8	8.811
Trial 1	1.3	Rep	M	0:06:41.394-0:06:41.660	IT1	1.18732	8	4.448
Trial 1	1.3	Rep	M	0:06:41.660-0:06:41.926	IT1	0.268958	8	1.00758
Trial 1	1.3	Rep	M	0:06:41.926-0:06:42.192	IT1	0.145081	8	0.543509
Trial 1	1.3	Rep	M	0:06:42.192-0:06:42.458	IT1	0.282937	8	1.05996
Trial 1	1.3	Rep	M	0:06:42.458-0:06:42.724	IT1	1.12425	8	4.21172
Trial 1	1.3	Rep	M	0:06:42.724-0:06:42.990	IT1	1.72041	8	6.44509
Trial 1	1.3	Rep	M	0:06:42.990-0:06:43.256	IT1	1.05794	8	3.96328
Trial 1	1.3	Rep	M	0:06:43.256-0:06:43.522	IT1	1.11536	8	4.17843
Trial 1	1.3	Rep	M	0:06:43.522-0:06:43.788	IT1	0.658074	8	2.46532
Trial 1	1.3	Rep	M	0:06:43.788-0:06:44.054	IT1	1.02676	8	3.8465
Trial 1	1.3	Rep	M	0:06:44.054-0:06:44.320	IT1	0.509997	8	1.91058
Trial 1	1.3	Rep	M	0:06:44.320-0:06:44.586	IT1	1.43791	8	5.38676
Trial 1	1.3	Rep	M	0:06:44.586-0:06:44.852	IT1	1.31894	8	4.9411
Trial 1	1.3	Rep	M	0:06:44.852-0:06:45.118	IT1	1.22508	8	4.58946
Trial 1	1.3	Rep	M	0:06:45.118-0:06:45.384	IT1	1.93692	8	7.25616
Trial 1	1.3	Rep	M	0:06:45.384-0:06:45.650	IT1	2.19543	8	8.22466
Trial 1	1.3	Rep	M	0:06:45.650-0:06:45.916	IT1	1.65577	8	6.20289
Trial 1	1.3	Rep	M	0:06:45.916-0:06:46.182	IT1	0.798299	8	2.99062
Trial 1	1.3	Rep	M	0:06:46.182-0:06:46.448	IT1	0.39443	8	1.47763
Trial 1	1.3	Rep	M	0:06:46.448-0:06:46.714	IT1	0.773224	8	2.89668
Trial 1	1.3	Rep	M	0:06:46.714-0:06:46.980	IT1	0.622988	8	2.33389
Trial 1	1.3	Rep	M	0:06:46.980-0:06:47.246	IT1	0.879636	8	3.29531
Trial 1	1.3	Rep	M	0:06:47.246-0:06:47.512	IT1	0.359544	8	1.34694
Trial 1	1.3	Rep	M	0:06:47.512-0:06:47.778	IT1	0.866202	8	3.245
Trial 1	1.3	Rep	M	0:06:47.778-0:06:48.044	IT1	0.295384	8	1.10658
Trial 1	1.3	Rep	M	0:06:48.044-0:06:48.310	IT1	0.623204	8	2.3347
Trial 1	1.3	Rep	M	0:06:48.310-0:06:48.576	IT1	0.918451	8	3.44074
Trial 1	1.3	Rep	M	0:06:48.576-0:06:48.842	IT1	1.09058	7	4.66923
Trial 1	1.3	Rep	M	0:06:48.842-0:06:49.108	IT1	0.686397	8	2.57141
Trial 1	1.3	Rep	M	0:06:49.108-0:06:49.374	IT1	0.562777	8	2.10831
Trial 1	1.3	Rep	M	0:06:49.374-0:06:49.640	IT1	0.471489	8	1.76632
Trial 1	1.3	Rep	M	0:06:49.640-0:06:49.906	IT1	1.07422	8	4.02431
Trial 1	1.3	Rep	M	0:06:49.906-0:06:50.172	IT1	0.343691	8	1.28755
Trial 1	1.3	Rep	M	0:06:50.172-0:06:50.438	CS2a	0.254169	8	0.952179
Trial 1	1.3	Rep	M	0:06:50.438-0:06:50.704	CS2a	0.0787959	8	0.295189
Trial 1	1.3	Rep	M	0:06:50.704-0:06:50.970	CS2a	0.102802	8	0.385122
Trial 1	1.3	Rep	M	0:06:50.970-0:06:51.236	CS2a	0.0649606	8	0.24336
Trial 1	1.3	Rep	M	0:06:51.236-0:06:51.502	CS2a	0.0453618	8	0.169937
Trial 1	1.3	Rep	M	0:06:51.502-0:06:51.768	CS2a	0.144955	8	0.543037
Trial 1	1.3	Rep	M	0:06:51.768-0:06:52.034	CS2a	0.170211	8	0.637654
Trial 1	1.3	Rep	M	0:06:52.034-0:06:52.300	CS2a	0.0525071	8	0.196704
Trial 1	1.3	Rep	M	0:06:52.300-0:06:52.566	CS2a	0.0505078	8	0.189214
Trial 1	1.3	Rep	M	0:06:52.566-0:06:52.832	CS2a	0.051368	8	0.192438
Trial 1	1.3	Rep	M	0:06:52.832-0:06:53.098	CS2a	0.20893	8	0.7827
Trial 1	1.3	Rep	M	0:06:53.098-0:06:53.364	CS2a	0.417029	8	1.5623
Trial 1	1.3	Rep	M	0:06:53.364-0:06:53.630	CS2a	0.223511	8	0.837325
Trial 1	1.3	Rep	M	0:06:53.630-0:06:53.896	CS2a	0.0604875	8	0.226602
Trial 1	1.3	Rep	M	0:06:53.896-0:06:54.162	CS2a	0.070697	8	0.264848
Trial 1	1.3	Rep	M	0:06:54.162-0:06:54.428	CS2a	0.0480131	8	0.179868
Trial 1	1.3	Rep	M	0:06:54.428-0:06:54.694	CS2a	0.0671286	8	0.251481
Trial 1	1.3	Rep	M	0:06:54.694-0:06:54.960	CS2a	0.0659369	8	0.247016
Trial 1	1.3	Rep	M	0:06:54.960-0:06:55.226	CS2a	0.0663525	8	0.248573
Trial 1	1.3	Rep	M	0:06:55.226-0:06:55.492	CS2a	0.0334106	8	0.125164
Trial 1	1.3	Rep	M	0:06:55.492-0:06:55.758	CS2a	0.0683704	8	0.256132
Trial 1	1.3	Rep	M	0:06:55.758-0:06:56.024	CS2a	0.0428567	8	0.160553
Trial 1	1.3	Rep	M	0:06:56.024-0:06:56.290	CS2a	0.10718	8	0.401521
Trial 1	1.3	Rep	M	0:06:56.290-0:06:56.556	CS2a	0.058336	8	0.218543
Trial 1	1.3	Rep	M	0:06:56.556-0:06:56.822	CS2a	0.0557519	8	0.20886
Trial 1	1.3	Rep	M	0:06:56.822-0:06:57.088	CS2a	0.0588804	8	0.220582
Trial 1	1.3	Rep	M	0:06:57.088-0:06:57.354	CS2a	0.0687342	8	0.257497
Trial 1	1.3	Rep	M	0:06:57.354-0:06:57.620	CS2a	0.0673131	8	0.25217
Trial 1	1.3	Rep	M	0:06:57.620-0:06:57.886	CS2a	0.0355292	8	0.133102
Trial 1	1.3	Rep	M	0:06:57.886-0:06:58.152	CS2a	0.0514857	8	0.192877
Trial 1	1.3	Rep	M	0:06:58.152-0:06:58.418	CS2a	0.0425963	7	0.182372
Trial 1	1.3	Rep	M	0:06:58.418-0:06:58.684	CS2a	0.0724937	8	0.271579
Trial 1	1.3	Rep	M	0:06:58.684-0:06:58.950	CS2a	0.0562755	8	0.210821
Trial 1	1.3	Rep	M	0:06:58.950-0:06:59.216	CS2a	0.0630058	8	0.236035
Trial 1	1.3	Rep	M	0:06:59.216-0:06:59.482	CS2a	0.0324508	8	0.12157
Trial 1	1.3	Rep	M	0:06:59.482-0:06:59.748	CS2a	0.0250846	8	0.0939728
Trial 1	1.3	Rep	M	0:06:59.748-0:07:00.014	CS2a	0.0807262	8	0.302419
Trial 1	1.3	Rep	M	0:07:00.014-0:07:00.280	CS2b	0.0450239	8	0.16867
Trial 1	1.3	Rep	M	0:07:00.280-0:07:00.546	CS2b	0.289681	8	1.08521
Trial 1	1.3	Rep	M	0:07:00.546-0:07:00.812	CS2b	0.232742	8	0.871916
Trial 1	1.3	Rep	M	0:07:00.812-0:07:01.078	CS2b	0.217473	8	0.814705
Trial 1	1.3	Rep	M	0:07:01.078-0:07:01.344	CS2b	0.04336	8	0.162438
Trial 1	1.3	Rep	M	0:07:01.344-0:07:01.610	CS2b	0.0949633	8	0.355755
Trial 1	1.3	Rep	M	0:07:01.610-0:07:01.876	CS2b	0.148045	8	0.554611
Trial 1	1.3	Rep	M	0:07:01.876-0:07:02.142	CS2b	0.0962573	8	0.360607
Trial 1	1.3	Rep	M	0:07:02.142-0:07:02.408	CS2b	0.111181	8	0.416513
Trial 1	1.3	Rep	M	0:07:02.408-0:07:02.674	CS2b	0.0476182	8	0.178391
Trial 1	1.3	Rep	M	0:07:02.674-0:07:02.940	CS2b	0.286097	8	1.07179
Trial 1	1.3	Rep	M	0:07:02.940-0:07:03.206	CS2b	0.115984	8	0.434504
Trial 1	1.3	Rep	M	0:07:03.206-0:07:03.472	CS2b	0.251641	8	0.942706
Trial 1	1.3	Rep	M	0:07:03.472-0:07:03.738	CS2b	0.18691	8	0.70021
Trial 1	1.3	Rep	M	0:07:03.738-0:07:04.004	CS2b	0.073856	8	0.276682
Trial 1	1.3	Rep	M	0:07:04.004-0:07:04.270	CS2b	0.0907961	8	0.340144
Trial 1	1.3	Rep	M	0:07:04.270-0:07:04.536	CS2b	0.0199836	8	0.0748636
Trial 1	1.3	Rep	M	0:07:04.536-0:07:04.802	CS2b	0.0733388	8	0.274745
Trial 1	1.3	Rep	M	0:07:04.802-0:07:05.068	CS2b	0.036535	8	0.136869
Trial 1	1.3	Rep	M	0:07:05.068-0:07:05.334	CS2b	0.123044	8	0.460957
Trial 1	1.3	Rep	M	0:07:05.334-0:07:05.600	CS2b	0.0814419	8	0.3051
Trial 1	1.3	Rep	M	0:07:05.600-0:07:05.866	CS2b	0.161246	8	0.604069
Trial 1	1.3	Rep	M	0:07:05.866-0:07:06.132	CS2b	0.113497	8	0.42519
Trial 1	1.3	Rep	M	0:07:06.132-0:07:06.398	CS2b	0.11796	8	0.441904
Trial 1	1.3	Rep	M	0:07:06.398-0:07:06.664	CS2b	0.108786	8	0.407538
Trial 1	1.3	Rep	M	0:07:06.664-0:07:06.930	CS2b	0.0254896	8	0.0954905
Trial 1	1.3	Rep	M	0:07:06.930-0:07:07.196	CS2b	0.109761	8	0.41119
Trial 1	1.3	Rep	M	0:07:07.196-0:07:07.462	CS2b	0.0453369	8	0.169844
Trial 1	1.3	Rep	M	0:07:07.462-0:07:07.728	CS2b	0.285053	8	1.06788
Trial 1	1.3	Rep	M	0:07:07.728-0:07:07.994	CS2b	0.152727	7	0.653892
Trial 1	1.3	Rep	M	0:07:07.994-0:07:08.260	CS2b	0.121157	8	0.453887
Trial 1	1.3	Rep	M	0:07:08.260-0:07:08.526	CS2b	0.0591812	8	0.221707
Trial 1	1.3	Rep	M	0:07:08.526-0:07:08.792	CS2b	0.28387	8	1.06345
Trial 1	1.3	Rep	M	0:07:08.792-0:07:09.058	CS2b	0.246768	8	0.924455
Trial 1	1.3	Rep	M	0:07:09.058-0:07:09.324	CS2b	0.0994426	8	0.372537
Trial 1	1.3	Rep	M	0:07:09.324-0:07:09.590	CS2b	0.252611	8	0.946349
Trial 1	1.3	Rep	M	0:07:09.590-0:07:09.856	CS2b	0.0993999	8	0.372376
Trial 1	1.3	Rep	M	0:07:09.856-0:07:10.122	CS2b	0.0879118	8	0.329338
Trial 1	1.3	Rep	M	0:07:10.122-0:07:10.388	IT2	6.40256	8	23.9855
Trial 1	1.3	Rep	M	0:07:10.388-0:07:10.654	IT2	13.8542	8	51.901
Trial 1	1.3	Rep	M	0:07:10.654-0:07:10.920	IT2	9.81848	8	36.7825
Trial 1	1.3	Rep	M	0:07:10.920-0:07:11.186	IT2	2.75911	8	10.3363
Trial 1	1.3	Rep	M	0:07:11.186-0:07:11.452	IT2	2.75813	8	10.3326
Trial 1	1.3	Rep	M	0:07:11.452-0:07:11.718	IT2	1.11624	8	4.18171
Trial 1	1.3	Rep	M	0:07:11.718-0:07:11.984	IT2	1.30711	8	4.89675
Trial 1	1.3	Rep	M	0:07:11.984-0:07:12.250	IT2	3.41591	8	12.7969
Trial 1	1.3	Rep	M	0:07:12.250-0:07:12.516	IT2	4.3883	8	16.4396
Trial 1	1.3	Rep	M	0:07:12.516-0:07:12.782	IT2	4.50548	8	16.8786
Trial 1	1.3	Rep	M	0:07:12.782-0:07:13.048	IT2	2.432	8	9.11091
Trial 1	1.3	Rep	M	0:07:13.048-0:07:13.314	IT2	0.899884	8	3.37118
Trial 1	1.3	Rep	M	0:07:13.314-0:07:13.580	IT2	0.790033	8	2.95968
Trial 1	1.3	Rep	M	0:07:13.580-0:07:13.846	IT2	2.86958	8	10.7501
Trial 1	1.3	Rep	M	0:07:13.846-0:07:14.112	IT2	2.529	8	9.47424
Trial 1	1.3	Rep	M	0:07:14.112-0:07:14.378	IT2	3.56074	8	13.3395
Trial 1	1.3	Rep	M	0:07:14.378-0:07:14.644	IT2	2.48331	8	9.30305
Trial 1	1.3	Rep	M	0:07:14.644-0:07:14.910	IT2	0.545815	8	2.04477
Trial 1	1.3	Rep	M	0:07:14.910-0:07:15.176	IT2	0.508152	8	1.90367
Trial 1	1.3	Rep	M	0:07:15.176-0:07:15.442	IT2	0.421474	8	1.57895
Trial 1	1.3	Rep	M	0:07:15.442-0:07:15.708	IT2	0.392736	8	1.47129
Trial 1	1.3	Rep	M	0:07:15.708-0:07:15.974	IT2	0.371374	8	1.39126
Trial 1	1.3	Rep	M	0:07:15.974-0:07:16.240	IT2	0.191903	8	0.718916
Trial 1	1.3	Rep	M	0:07:16.240-0:07:16.506	IT2	0.330125	8	1.23673
Trial 1	1.3	Rep	M	0:07:16.506-0:07:16.772	IT2	0.793611	8	2.97306
Trial 1	1.3	Rep	M	0:07:16.772-0:07:17.038	IT2	0.541156	8	2.0273
Trial 1	1.3	Rep	M	0:07:17.038-0:07:17.304	IT2	0.489369	8	1.83329
Trial 1	1.3	Rep	M	0:07:17.304-0:07:17.570	IT2	0.826397	7	3.53815
Trial 1	1.3	Rep	M	0:07:17.570-0:07:17.836	IT2	0.806038	8	3.01963
Trial 1	1.3	Rep	M	0:07:17.836-0:07:18.102	IT2	0.899233	8	3.36875
Trial 1	1.3	Rep	M	0:07:18.102-0:07:18.368	IT2	0.729237	8	2.7319
Trial 1	1.3	Rep	M	0:07:18.368-0:07:18.634	IT2	0.172081	8	0.644659
Trial 1	1.3	Rep	M	0:07:18.634-0:07:18.900	IT2	0.210365	8	0.788079
Trial 1	1.3	Rep	M	0:07:18.900-0:07:19.166	IT2	0.322638	8	1.20869
Trial 1	1.3	Rep	M	0:07:19.166-0:07:19.432	IT2	0.176634	8	0.661713
Trial 1	1.3	Rep	M	0:07:19.432-0:07:19.698	IT2	0.187661	8	0.703026
Trial 1	1.3	Rep	M	0:07:19.698-0:07:19.964	IT2	0.475811	8	1.78251
Trial 1	1.3	Rep	M	0:07:19.964-0:07:20.230	IT2	0.38027	8	1.42459
Trial 1	1.3	Rep	M	0:07:20.230-0:07:20.496	IT2	0.232282	8	0.87019
Trial 1	1.3	Rep	M	0:07:20.496-0:07:20.762	IT2	0.139648	8	0.523155
Trial 1	1.3	Rep	M	0:07:20.762-0:07:21.028	IT2	0.185158	8	0.693654
Trial 1	1.3	Rep	M	0:07:21.028-0:07:21.294	IT2	0.209032	8	0.783084
Trial 1	1.3	Rep	M	0:07:21.294-0:07:21.560	IT2	0.316314	8	1.18499
Trial 1	1.3	Rep	M	0:07:21.560-0:07:21.826	IT2	0.314285	8	1.17739
Trial 1	1.3	Rep	M	0:07:21.826-0:07:22.092	IT2	0.448744	8	1.68111
Trial 1	1.3	Rep	M	0:07:22.092-0:07:22.358	IT2	0.947788	8	3.55066
Trial 1	1.3	Rep	M	0:07:22.358-0:07:22.624	IT2	1.3719	8	5.13945
Trial 1	1.3	Rep	M	0:07:22.624-0:07:22.890	IT2	0.649631	8	2.43368
Trial 1	1.3	Rep	M	0:07:22.890-0:07:23.156	IT2	0.143131	8	0.536208
Trial 1	1.3	Rep	M	0:07:23.156-0:07:23.422	IT2	0.200163	8	0.749861
Trial 1	1.3	Rep	M	0:07:23.422-0:07:23.688	IT2	0.241458	8	0.904565
Trial 1	1.3	Rep	M	0:07:23.688-0:07:23.954	IT2	0.128057	8	0.479733
Trial 1	1.3	Rep	M	0:07:23.954-0:07:24.220	IT2	0.24657	8	0.923717
Trial 1	1.3	Rep	M	0:07:24.220-0:07:24.486	IT2	0.214742	8	0.804479
Trial 1	1.3	Rep	M	0:07:24.486-0:07:24.752	IT2	0.513908	8	1.92522
Trial 1	1.3	Rep	M	0:07:24.752-0:07:25.018	IT2	0.784675	8	2.93959
Trial 1	1.3	Rep	M	0:07:25.018-0:07:25.284	IT2	0.35508	8	1.33022
Trial 1	1.3	Rep	M	0:07:25.284-0:07:25.550	IT2	0.151606	8	0.56795
Trial 1	1.3	Rep	M	0:07:25.550-0:07:25.816	IT2	0.960692	8	3.59901
Trial 1	1.3	Rep	M	0:07:25.816-0:07:26.082	IT2	2.13144	8	7.98492
Trial 1	1.3	Rep	M	0:07:26.082-0:07:26.348	IT2	2.96209	8	11.0968
Trial 1	1.3	Rep	M	0:07:26.348-0:07:26.614	IT2	2.94546	8	11.0344
Trial 1	1.3	Rep	M	0:07:26.614-0:07:26.880	IT2	2.68359	7	11.4896
Trial 1	1.3	Rep	M	0:07:26.880-0:07:27.146	IT2	2.63094	8	9.85617
Trial 1	1.3	Rep	M	0:07:27.146-0:07:27.412	IT2	2.69083	8	10.0806
Trial 1	1.3	Rep	M	0:07:27.412-0:07:27.678	IT2	3.10579	8	11.635
Trial 1	1.3	Rep	M	0:07:27.678-0:07:27.944	IT2	1.69166	8	6.3374
Trial 1	1.3	Rep	M	0:07:27.944-0:07:28.210	IT2	1.0266	8	3.8459
Trial 1	1.3	Rep	M	0:07:28.210-0:07:28.476	IT2	0.56958	8	2.13379
Trial 1	1.3	Rep	M	0:07:28.476-0:07:28.742	IT2	1.13992	8	4.27044
Trial 1	1.3	Rep	M	0:07:28.742-0:07:29.008	IT2	0.596436	8	2.23439
Trial 1	1.3	Rep	M	0:07:29.008-0:07:29.274	IT2	1.06015	8	3.97159
Trial 1	1.3	Rep	M	0:07:29.274-0:07:29.540	IT2	1.10031	8	4.12204
Trial 1	1.3	Rep	M	0:07:29.540-0:07:29.806	IT2	0.87461	8	3.2765
Trial 1	1.3	Rep	M	0:07:29.806-0:07:30.072	IT2	0.290996	8	1.09015
Trial 1	1.3	Rep	M	0:07:30.072-0:07:30.338	IT2	0.665434	8	2.49288
Trial 1	1.3	Rep	M	0:07:30.338-0:07:30.604	IT2	4.34595	8	16.281
Trial 1	1.3	Rep	M	0:07:30.604-0:07:30.870	IT2	0.576585	8	2.16003
Trial 1	1.3	Rep	M	0:07:30.870-0:07:31.136	IT2	1.84716	8	6.91988
Trial 1	1.3	Rep	M	0:07:31.136-0:07:31.402	IT2	1.74459	8	6.53564
Trial 1	1.3	Rep	M	0:07:31.402-0:07:31.668	IT2	1.78408	8	6.68359
Trial 1	1.3	Rep	M	0:07:31.668-0:07:31.934	IT2	1.02289	8	3.83203
Trial 1	1.3	Rep	M	0:07:31.934-0:07:32.200	IT2	0.546574	8	2.04761
Trial 1	1.3	Rep	M	0:07:32.200-0:07:32.466	IT2	0.182694	8	0.684418
Trial 1	1.3	Rep	M	0:07:32.466-0:07:32.732	IT2	0.231093	8	0.865732
Trial 1	1.3	Rep	M	0:07:32.732-0:07:32.998	IT2	0.706311	8	2.64602
Trial 1	1.3	Rep	M	0:07:32.998-0:07:33.264	IT2	0.765858	8	2.86911
Trial 1	1.3	Rep	M	0:07:33.264-0:07:33.530	IT2	1.22956	8	4.60625
Trial 1	1.3	Rep	M	0:07:33.530-0:07:33.796	IT2	0.522436	8	1.95717
Trial 1	1.3	Rep	M	0:07:33.796-0:07:34.062	IT2	1.48789	8	5.57402
Trial 1	1.3	Rep	M	0:07:34.062-0:07:34.328	IT2	0.751895	8	2.81678
Trial 1	1.3	Rep	M	0:07:34.328-0:07:34.594	IT2	0.15567	8	0.583182
Trial 1	1.3	Rep	M	0:07:34.594-0:07:34.860	IT2	1.89101	8	7.08419
Trial 1	1.3	Rep	M	0:07:34.860-0:07:35.126	IT2	1.77517	8	6.65024
Trial 1	1.3	Rep	M	0:07:35.126-0:07:35.392	IT2	0.545927	8	2.04519
Trial 1	1.3	Rep	M	0:07:35.392-0:07:35.658	IT2	0.892358	8	3.34299
Trial 1	1.3	Rep	M	0:07:35.658-0:07:35.924	IT2	2.48176	8	9.29733
Trial 1	1.3	Rep	M	0:07:35.924-0:07:36.190	IT2	4.4134	8	16.5337
Trial 1	1.3	Rep	M	0:07:36.190-0:07:36.456	IT2	4.99147	7	21.3706
Trial 1	1.3	Rep	M	0:07:36.456-0:07:36.722	IT2	3.0016	8	11.2448
Trial 1	1.3	Rep	M	0:07:36.722-0:07:36.988	IT2	0.713611	8	2.67336
Trial 1	1.3	Rep	M	0:07:36.988-0:07:37.254	IT2	1.07867	8	4.04097
Trial 1	1.3	Rep	M	0:07:37.254-0:07:37.520	IT2	3.82355	8	14.324
Trial 1	1.3	Rep	M	0:07:37.520-0:07:37.786	IT2	3.82235	8	14.3195
Trial 1	1.3	Rep	M	0:07:37.786-0:07:38.052	IT2	1.58391	8	5.93374
Trial 1	1.3	Rep	M	0:07:38.052-0:07:38.318	IT2	1.90319	8	7.12983
Trial 1	1.3	Rep	M	0:07:38.318-0:07:38.584	IT2	0.511258	8	1.9153
Trial 1	1.3	Rep	M	0:07:38.584-0:07:38.850	IT2	0.207235	8	0.776357
Trial 1	1.3	Rep	M	0:07:38.850-0:07:39.116	IT2	1.01067	8	3.78623
Trial 1	1.3	Rep	M	0:07:39.116-0:07:39.382	IT2	2.99039	8	11.2028
Trial 1	1.3	Rep	M	0:07:39.382-0:07:39.648	IT2	0.966988	8	3.62257
Trial 1	1.3	Rep	M	0:07:39.648-0:07:39.914	IT2	0.42521	8	1.59294
Trial 1	1.3	Rep	M	0:07:39.914-0:07:40.180	IT2	0.0970807	8	0.363688
Trial 1	1.3	Rep	M	0:07:40.180-0:07:40.446	IT2	0.0824532	8	0.308891
Trial 1	1.3	Rep	M	0:07:40.446-0:07:40.712	IT2	0.0672306	8	0.251862
Trial 1	1.3	Rep	M	0:07:40.712-0:07:40.978	IT2	0.13085	8	0.490195
Trial 1	1.3	Rep	M	0:07:40.978-0:07:41.244	IT2	0.261598	8	0.980011
Trial 1	1.3	Rep	M	0:07:41.244-0:07:41.510	IT2	0.193239	8	0.723923
Trial 1	1.3	Rep	M	0:07:41.510-0:07:41.776	IT2	0.443982	8	1.66326
Trial 1	1.3	Rep	M	0:07:41.776-0:07:42.042	IT2	0.642482	8	2.4069
Trial 1	1.3	Rep	M	0:07:42.042-0:07:42.308	IT2	0.101296	8	0.379477
Trial 1	1.3	Rep	M	0:07:42.308-0:07:42.574	IT2	0.104028	8	0.389716
Trial 1	1.3	Rep	M	0:07:42.574-0:07:42.840	IT2	0.0434247	8	0.162681
Trial 1	1.3	Rep	M	0:07:42.840-0:07:43.106	IT2	0.549479	8	2.05848
Trial 1	1.3	Rep	M	0:07:43.106-0:07:43.372	IT2	1.87626	8	7.02896
Trial 1	1.3	Rep	M	0:07:43.372-0:07:43.638	IT2	2.27973	8	8.54043
Trial 1	1.3	Rep	M	0:07:43.638-0:07:43.904	IT2	3.38131	8	12.6672
Trial 1	1.3	Rep	M	0:07:43.904-0:07:44.170	IT2	3.94804	8	14.7904
Trial 1	1.3	Rep	M	0:07:44.170-0:07:44.436	IT2	3.26762	8	12.2413
Trial 1	1.3	Rep	M	0:07:44.436-0:07:44.702	IT2	0.829898	8	3.10901
Trial 1	1.3	Rep	M	0:07:44.702-0:07:44.968	IT2	1.06033	8	3.97225
Trial 1	1.3	Rep	M	0:07:44.968-0:07:45.234	IT2	2.02209	8	7.57525
Trial 1	1.3	Rep	M	0:07:45.234-0:07:45.500	IT2	0.832525	8	3.11885
Trial 1	1.3	Rep	M	0:07:45.500-0:07:45.766	IT2	0.27573	8	1.03295
Trial 1	1.3	Rep	M	0:07:45.766-0:07:46.032	IT2	0.156977	7	0.672086
Trial 1	1.3	Rep	M	0:07:46.032-0:07:46.298	IT2	0.345	8	1.29245
Trial 1	1.3	Rep	M	0:07:46.298-0:07:46.564	IT2	0.41222	8	1.54427
Trial 1	1.3	Rep	M	0:07:46.564-0:07:46.830	IT2	0.284312	8	1.0651
Trial 1	1.3	Rep	M	0:07:46.830-0:07:47.096	IT2	0.556549	8	2.08498
Trial 1	1.3	Rep	M	0:07:47.096-0:07:47.362	IT2	0.581769	8	2.17945
Trial 1	1.3	Rep	M	0:07:47.362-0:07:47.628	IT2	0.11752	8	0.440263
Trial 1	1.3	Rep	M	0:07:47.628-0:07:47.894	IT2	0.241682	8	0.905402
Trial 1	1.3	Rep	M	0:07:47.894-0:07:48.160	IT2	0.141772	8	0.53111
Trial 1	1.3	Rep	M	0:07:48.160-0:07:48.426	IT2	0.121753	8	0.456122
Trial 1	1.3	Rep	M	0:07:48.426-0:07:48.692	IT2	0.161189	8	0.603848
Trial 1	1.3	Rep	M	0:07:48.692-0:07:48.958	IT2	0.0791944	8	0.296682
Trial 1	1.3	Rep	M	0:07:48.958-0:07:49.224	IT2	0.157478	8	0.589953
Trial 1	1.3	Rep	M	0:07:49.224-0:07:49.490	IT2	0.084352	8	0.316002
Trial 1	1.3	Rep	M	0:07:49.490-0:07:49.756	IT2	0.116366	8	0.435939
Trial 1	1.3	Rep	M	0:07:49.756-0:07:50.022	IT2	0.100709	8	0.377281
Trial 1	1.3	Rep	M	0:07:50.022-0:07:50.288	IT2	0.187728	8	0.703281
Trial 1	1.3	Rep	M	0:07:50.288-0:07:50.554	IT2	0.467535	8	1.7515
Trial 1	1.3	Rep	M	0:07:50.554-0:07:50.820	IT2	1.14874	8	4.30347
Trial 1	1.3	Rep	M	0:07:50.820-0:07:51.086	IT2	0.515035	8	1.92946
Trial 1	1.3	Rep	M	0:07:51.086-0:07:51.352	IT2	0.611968	8	2.29258
Trial 1	1.3	Rep	M	0:07:51.352-0:07:51.618	IT2	0.461328	8	1.72825
Trial 1	1.3	Rep	M	0:07:51.618-0:07:51.884	IT2	1.82697	8	6.84431
Trial 1	1.3	Rep	M	0:07:51.884-0:07:52.150	IT2	0.761673	8	2.85341
Trial 1	1.3	Rep	M	0:07:52.150-0:07:52.416	IT2	0.261304	8	0.978912
Trial 1	1.3	Rep	M	0:07:52.416-0:07:52.682	IT2	0.114412	8	0.428614
Trial 1	1.3	Rep	M	0:07:52.682-0:07:52.948	IT2	0.112982	8	0.42326
Trial 1	1.3	Rep	M	0:07:52.948-0:07:53.214	IT2	0.230252	8	0.862581
Trial 1	1.3	Rep	M	0:07:53.214-0:07:53.480	IT2	0.214238	8	0.802593
Trial 1	1.3	Rep	M	0:07:53.480-0:07:53.746	IT2	0.168271	8	0.630388
Trial 1	1.3	Rep	M	0:07:53.746-0:07:54.012	IT2	0.107926	8	0.404315
Trial 1	1.3	Rep	M	0:07:54.012-0:07:54.278	IT2	0.068113	8	0.255168
Trial 1	1.3	Rep	M	0:07:54.278-0:07:54.544	IT2	0.134662	8	0.504478
Trial 1	1.3	Rep	M	0:07:54.544-0:07:54.810	IT2	0.215171	8	0.806081
Trial 1	1.3	Rep	M	0:07:54.810-0:07:55.076	IT2	0.509282	8	1.90791
Trial 1	1.3	Rep	M	0:07:55.076-0:07:55.342	IT2	0.509253	7	2.18033
Trial 1	1.3	Rep	M	0:07:55.342-0:07:55.608	IT2	0.542918	8	2.0339
Trial 1	1.3	Rep	M	0:07:55.608-0:07:55.874	IT2	0.705256	8	2.64207
Trial 1	1.3	Rep	M	0:07:55.874-0:07:56.140	IT2	1.40523	8	5.26435
Trial 1	1.3	Rep	M	0:07:56.140-0:07:56.406	IT2	1.25483	8	4.70093
Trial 1	1.3	Rep	M	0:07:56.406-0:07:56.672	IT2	0.34648	8	1.298
Trial 1	1.3	Rep	M	0:07:56.672-0:07:56.938	IT2	0.373575	8	1.3995
Trial 1	1.3	Rep	M	0:07:56.938-0:07:57.204	IT2	0.430842	8	1.61405
Trial 1	1.3	Rep	M	0:07:57.204-0:07:57.470	IT2	0.347818	8	1.30301
Trial 1	1.3	Rep	M	0:07:57.470-0:07:57.736	IT2	0.351481	8	1.31674
Trial 1	1.3	Rep	M	0:07:57.736-0:07:58.002	IT2	0.313792	8	1.17554
Trial 1	1.3	Rep	M	0:07:58.002-0:07:58.268	IT2	0.195085	8	0.730832
Trial 1	1.3	Rep	M	0:07:58.268-0:07:58.534	IT2	0.130075	8	0.487295
Trial 1	1.3	Rep	M	0:07:58.534-0:07:58.800	IT2	0.195854	8	0.733719
Trial 1	1.3	Rep	M	0:07:58.800-0:07:59.066	IT2	0.364208	8	1.36441
Trial 1	1.3	Rep	M	0:07:59.066-0:07:59.332	IT2	0.328963	8	1.23238
Trial 1	1.3	Rep	M	0:07:59.332-0:07:59.598	IT2	0.295208	8	1.10592
Trial 1	1.3	Rep	M	0:07:59.598-0:07:59.864	IT2	0.276935	8	1.03747
Trial 1	1.3	Rep	M	0:07:59.864-0:08:00.130	IT2	0.30391	8	1.13853
Trial 1	1.3	Rep	M	0:08:00.130-0:08:00.396	IT2	0.131735	8	0.493514
Trial 1	1.3	Rep	M	0:08:00.396-0:08:00.662	IT2	0.22001	8	0.824209
Trial 1	1.3	Rep	M	0:08:00.662-0:08:00.928	IT2	0.162641	8	0.609298
Trial 1	1.3	Rep	M	0:08:00.928-0:08:01.194	IT2	0.234193	8	0.877341
Trial 1	1.3	Rep	M	0:08:01.194-0:08:01.460	IT2	0.319657	8	1.19751
Trial 1	1.3	Rep	M	0:08:01.460-0:08:01.726	IT2	0.212804	8	0.797215
Trial 1	1.3	Rep	M	0:08:01.726-0:08:01.992	IT2	0.247052	8	0.925518
Trial 1	1.3	Rep	M	0:08:01.992-0:08:02.258	IT2	0.144782	8	0.542392
Trial 1	1.3	Rep	M	0:08:02.258-0:08:02.524	IT2	0.191841	8	0.718683
Trial 1	1.3	Rep	M	0:08:02.524-0:08:02.790	IT2	0.125094	8	0.468635
Trial 1	1.3	Rep	M	0:08:02.790-0:08:03.056	IT2	0.319796	8	1.19803
Trial 1	1.3	Rep	M	0:08:03.056-0:08:03.322	IT2	0.353894	8	1.32577
Trial 1	1.3	Rep	M	0:08:03.322-0:08:03.588	IT2	0.15708	8	0.588458
Trial 1	1.3	Rep	M	0:08:03.588-0:08:03.854	IT2	0.186734	8	0.699557
Trial 1	1.3	Rep	M	0:08:03.854-0:08:04.120	IT2	0.195555	8	0.732593
Trial 1	1.3	Rep	M	0:08:04.120-0:08:04.386	IT2	0.14562	8	0.545532
Trial 1	1.3	Rep	M	0:08:04.386-0:08:04.652	IT2	0.0624523	8	0.233963
Trial 1	1.3	Rep	M	0:08:04.652-0:08:04.918	IT2	0.231199	7	0.989856
Trial 1	1.3	Rep	M	0:08:04.918-0:08:05.184	IT2	0.0684616	8	0.256474
Trial 1	1.3	Rep	M	0:08:05.184-0:08:05.450	IT2	0.189537	8	0.710056
Trial 1	1.3	Rep	M	0:08:05.450-0:08:05.716	IT2	0.101902	8	0.381749
Trial 1	1.3	Rep	M	0:08:05.716-0:08:05.982	IT2	0.156811	8	0.587453
Trial 1	1.3	Rep	M	0:08:05.982-0:08:06.248	IT2	0.121346	8	0.454596
Trial 1	1.3	Rep	M	0:08:06.248-0:08:06.514	IT2	0.0891434	8	0.333953
Trial 1	1.3	Rep	M	0:08:06.514-0:08:06.780	IT2	0.117359	8	0.439659
Trial 1	1.3	Rep	M	0:08:06.780-0:08:07.046	IT2	0.135959	8	0.509338
Trial 1	1.3	Rep	M	0:08:07.046-0:08:07.312	IT2	0.23069	8	0.864226
Trial 1	1.3	Rep	M	0:08:07.312-0:08:07.578	IT2	0.321505	8	1.20443
Trial 1	1.3	Rep	M	0:08:07.578-0:08:07.844	IT2	0.380855	8	1.42678
Trial 1	1.3	Rep	M	0:08:07.844-0:08:08.110	IT2	0.220561	8	0.826277
Trial 1	1.3	Rep	M	0:08:08.110-0:08:08.376	IT2	0.183128	8	0.686042
Trial 1	1.3	Rep	M	0:08:08.376-0:08:08.642	IT2	0.283802	8	1.0632
Trial 1	1.3	Rep	M	0:08:08.642-0:08:08.908	IT2	0.356684	8	1.33622
Trial 1	1.3	Rep	M	0:08:08.908-0:08:09.174	IT2	0.121236	8	0.454182
Trial 1	1.3	Rep	M	0:08:09.174-0:08:09.440	IT2	0.143593	8	0.53794
Trial 1	1.3	Rep	M	0:08:09.440-0:08:09.706	IT2	0.23489	8	0.879954
Trial 1	1.3	Rep	M	0:08:09.706-0:08:09.972	IT2	0.272347	8	1.02029
Trial 1	1.3	Rep	M	0:08:09.972-0:08:10.238	IT2	0.131395	8	0.492237
Trial 1	1.3	Rep	M	0:08:10.238-0:08:10.504	IT2	0.19533	8	0.731752
Trial 1	1.3	Rep	M	0:08:10.504-0:08:10.770	IT2	0.164179	8	0.615056
Trial 1	1.3	Rep	M	0:08:10.770-0:08:11.036	IT2	0.135327	8	0.506969
Trial 1	1.3	Rep	M	0:08:11.036-0:08:11.302	IT2	0.084735	8	0.31744
Trial 1	1.3	Rep	M	0:08:11.302-0:08:11.568	IT2	0.115782	8	0.433747
Trial 1	1.3	Rep	M	0:08:11.568-0:08:11.834	IT2	0.0936318	8	0.350769
Trial 1	1.3	Rep	M	0:08:11.834-0:08:12.100	IT2	0.077996	8	0.292192
Trial 1	1.3	Rep	M	0:08:12.100-0:08:12.366	IT2	0.0303036	8	0.113525
Trial 1	1.3	Rep	M	0:08:12.366-0:08:12.632	IT2	0.159027	8	0.595755
Trial 1	1.3	Rep	M	0:08:12.632-0:08:12.898	IT2	0.0710742	8	0.266262
Trial 1	1.3	Rep	M	0:08:12.898-0:08:13.164	IT2	0.101066	8	0.378616
Trial 1	1.3	Rep	M	0:08:13.164-0:08:13.430	IT2	0.0588515	8	0.220473
Trial 1	1.3	Rep	M	0:08:13.430-0:08:13.696	IT2	0.0674967	8	0.252859
Trial 1	1.3	Rep	M	0:08:13.696-0:08:13.962	IT2	0.107743	8	0.403635
Trial 1	1.3	Rep	M	0:08:13.962-0:08:14.228	IT2	0.345967	8	1.29608
Trial 1	1.3	Rep	M	0:08:14.228-0:08:14.494	IT2	0.344031	7	1.47296
Trial 1	1.3	Rep	M	0:08:14.494-0:08:14.760	IT2	0.337696	8	1.2651
Trial 1	1.3	Rep	M	0:08:14.760-0:08:15.026	IT2	0.270003	8	1.0115
Trial 1	1.3	Rep	M	0:08:15.026-0:08:15.292	IT2	0.110229	8	0.412944
Trial 1	1.3	Rep	M	0:08:15.292-0:08:15.558	IT2	0.0878004	8	0.328924
Trial 1	1.3	Rep	M	0:08:15.558-0:08:15.824	IT2	0.138242	8	0.517887
Trial 1	1.3	Rep	M	0:08:15.824-0:08:16.090	IT2	0.0439548	8	0.164667
Trial 1	1.3	Rep	M	0:08:16.090-0:08:16.356	IT2	0.146002	8	0.546957
Trial 1	1.3	Rep	M	0:08:16.356-0:08:16.622	IT2	0.16257	8	0.609028
Trial 1	1.3	Rep	M	0:08:16.622-0:08:16.888	IT2	0.434621	8	1.6282
Trial 1	1.3	Rep	M	0:08:16.888-0:08:17.154	IT2	0.325634	8	1.2199
Trial 1	1.3	Rep	M	0:08:17.154-0:08:17.420	IT2	0.311874	8	1.16835
Trial 1	1.3	Rep	M	0:08:17.420-0:08:17.686	IT2	0.269311	8	1.0089
Trial 1	1.3	Rep	M	0:08:17.686-0:08:17.952	IT2	0.219632	8	0.822797
Trial 1	1.3	Rep	M	0:08:17.952-0:08:18.218	IT2	0.352481	8	1.32049
Trial 1	1.3	Rep	M	0:08:18.218-0:08:18.484	IT2	0.115138	8	0.431337
Trial 1	1.3	Rep	M	0:08:18.484-0:08:18.750	IT2	0.168728	8	0.6321
Trial 1	1.3	Rep	M	0:08:18.750-0:08:19.016	IT2	0.0728851	8	0.273046
Trial 1	1.3	Rep	M	0:08:19.016-0:08:19.282	IT2	0.0758205	8	0.284043
Trial 1	1.3	Rep	M	0:08:19.282-0:08:19.548	IT2	0.205939	8	0.771494
Trial 1	1.3	Rep	M	0:08:19.548-0:08:19.814	IT2	0.108223	8	0.405427
Trial 1	1.3	Rep	M	0:08:19.814-0:08:20.080	IT2	0.0842373	8	0.315574
Trial 1	1.3	Rep	M	0:08:20.080-0:08:20.346	IT2	0.132879	8	0.497797
Trial 1	1.3	Rep	M	0:08:20.346-0:08:20.612	IT2	0.210138	8	0.787232
Trial 1	1.3	Rep	M	0:08:20.612-0:08:20.878	IT2	0.0627804	8	0.235192
Trial 1	1.3	Rep	M	0:08:20.878-0:08:21.144	IT2	0.324732	8	1.21653
Trial 1	1.3	Rep	M	0:08:21.144-0:08:21.410	IT2	0.225347	8	0.844214
Trial 1	1.3	Rep	M	0:08:21.410-0:08:21.676	IT2	0.202888	8	0.760066
Trial 1	1.3	Rep	M	0:08:21.676-0:08:21.942	IT2	0.0612016	8	0.229276
Trial 1	1.3	Rep	M	0:08:21.942-0:08:22.208	IT2	0.178354	8	0.668157
Trial 1	1.3	Rep	M	0:08:22.208-0:08:22.474	IT2	0.330923	8	1.23972
Trial 1	1.3	Rep	M	0:08:22.474-0:08:22.740	IT2	0.467973	8	1.75315
Trial 1	1.3	Rep	M	0:08:22.740-0:08:23.006	IT2	0.178701	8	0.669457
Trial 1	1.3	Rep	M	0:08:23.006-0:08:23.272	IT2	0.138039	8	0.51713
Trial 1	1.3	Rep	M	0:08:23.272-0:08:23.538	IT2	0.270601	8	1.01374
Trial 1	1.3	Rep	M	0:08:23.538-0:08:23.804	IT2	0.225245	8	0.843824
Trial 1	1.3	Rep	M	0:08:23.804-0:08:24.070	IT2	0.251947	7	1.07869
Trial 1	1.3	Rep	M	0:08:24.070-0:08:24.336	IT2	0.174398	8	0.653342
Trial 1	1.3	Rep	M	0:08:24.336-0:08:24.602	IT2	0.290522	8	1.08837
Trial 1	1.3	Rep	M	0:08:24.602-0:08:24.868	IT2	0.328425	8	1.23036
Trial 1	1.3	Rep	M	0:08:24.868-0:08:25.134	IT2	0.305233	8	1.14348
Trial 1	1.3	Rep	M	0:08:25.134-0:08:25.400	IT2	0.294639	8	1.10379
Trial 1	1.3	Rep	M	0:08:25.400-0:08:25.666	IT2	0.210284	8	0.78778
Trial 1	1.3	Rep	M	0:08:25.666-0:08:25.932	IT2	0.503595	8	1.88658
Trial 1	1.3	Rep	M	0:08:25.932-0:08:26.198	IT2	0.601027	8	2.25159
Trial 1	1.3	Rep	M	0:08:26.198-0:08:26.464	IT2	0.539911	8	2.02264
Trial 1	1.3	Rep	M	0:08:26.464-0:08:26.730	IT2	0.278935	8	1.04496
Trial 1	1.3	Rep	M	0:08:26.730-0:08:26.996	IT2	0.130021	8	0.487092
Trial 1	1.3	Rep	M	0:08:26.996-0:08:27.262	IT2	0.135213	8	0.506543
Trial 1	1.3	Rep	M	0:08:27.262-0:08:27.528	IT2	0.100167	8	0.37525
Trial 1	1.3	Rep	M	0:08:27.528-0:08:27.794	IT2	0.0930234	8	0.34849
Trial 1	1.3	Rep	M	0:08:27.794-0:08:28.060	IT2	0.0617965	8	0.231506
Trial 1	1.3	Rep	M	0:08:28.060-0:08:28.326	IT2	0.11843	8	0.443668
Trial 1	1.3	Rep	M	0:08:28.326-0:08:28.592	IT2	0.126519	8	0.473971
Trial 1	1.3	Rep	M	0:08:28.592-0:08:28.858	IT2	0.164598	8	0.616626
Trial 1	1.3	Rep	M	0:08:28.858-0:08:29.124	IT2	0.168445	8	0.631038
Trial 1	1.3	Rep	M	0:08:29.124-0:08:29.390	IT2	0.150612	8	0.564231
Trial 1	1.3	Rep	M	0:08:29.390-0:08:29.656	IT2	0.0714744	8	0.267762
Trial 1	1.3	Rep	M	0:08:29.656-0:08:29.922	IT2	0.124158	8	0.465125
Trial 1	1.3	Rep	M	0:08:29.922-0:08:30.188	IT2	0.178925	8	0.6703
Trial 1	1.3	Rep	M	0:08:30.188-0:08:30.454	IT2	0.129784	8	0.486201
Trial 1	1.3	Rep	M	0:08:30.454-0:08:30.720	IT2	0.18681	8	0.699833
Trial 1	1.3	Rep	M	0:08:30.720-0:08:30.986	IT2	0.27903	8	1.04532
Trial 1	1.3	Rep	M	0:08:30.986-0:08:31.252	IT2	0.257254	8	0.963736
Trial 1	1.3	Rep	M	0:08:31.252-0:08:31.518	IT2	0.0785536	8	0.29428
Trial 1	1.3	Rep	M	0:08:31.518-0:08:31.784	IT2	0.153169	8	0.573809
Trial 1	1.3	Rep	M	0:08:31.784-0:08:32.050	IT2	0.123556	8	0.462869
Trial 1	1.3	Rep	M	0:08:32.050-0:08:32.316	IT2	0.269169	8	1.00838
Trial 1	1.3	Rep	M	0:08:32.316-0:08:32.582	IT2	0.252893	8	0.947399
Trial 1	1.3	Rep	M	0:08:32.582-0:08:32.848	IT2	0.177436	8	0.664719
Trial 1	1.3	Rep	M	0:08:32.848-0:08:33.114	IT2	0.305277	8	1.14365
Trial 1	1.3	Rep	M	0:08:33.114-0:08:33.380	IT2	0.195708	7	0.837911
Trial 1	1.3	Rep	M	0:08:33.380-0:08:33.646	IT2	0.231564	8	0.867494
Trial 1	1.3	Rep	M	0:08:33.646-0:08:33.912	IT2	0.213171	8	0.798588
Trial 1	1.3	Rep	M	0:08:33.912-0:08:34.178	IT2	0.260643	8	0.976433
Trial 1	1.3	Rep	M	0:08:34.178-0:08:34.444	IT2	0.176814	8	0.662396
Trial 1	1.3	Rep	M	0:08:34.444-0:08:34.710	IT2	0.0592007	8	0.22178
Trial 1	1.3	Rep	M	0:08:34.710-0:08:34.976	IT2	0.167682	8	0.628175
Trial 1	1.3	Rep	M	0:08:34.976-0:08:35.242	IT2	0.0179002	8	0.0670585
Trial 1	1.3	Rep	M	0:08:35.242-0:08:35.508	IT2	0.226385	8	0.848103
Trial 1	1.3	Rep	M	0:08:35.508-0:08:35.774	IT2	0.151324	8	0.566905
Trial 1	1.3	Rep	M	0:08:35.774-0:08:36.040	IT2	0.108349	8	0.405901
Trial 1	1.3	Rep	M	0:08:36.040-0:08:36.306	IT2	0.25845	8	0.968214
Trial 1	1.3	Rep	M	0:08:36.306-0:08:36.572	IT2	0.181364	8	0.679437
Trial 1	1.3	Rep	M	0:08:36.572-0:08:36.838	IT2	0.151465	8	0.567425
Trial 1	1.3	Rep	M	0:08:36.838-0:08:37.104	IT2	0.217795	8	0.815915
Trial 1	1.3	Rep	M	0:08:37.104-0:08:37.370	IT2	0.126457	8	0.473736
Trial 1	1.3	Rep	M	0:08:37.370-0:08:37.636	IT2	0.0642848	8	0.240826
Trial 1	1.3	Rep	M	0:08:37.636-0:08:37.902	IT2	0.0693779	8	0.259908
Trial 1	1.3	Rep	M	0:08:37.902-0:08:38.168	IT2	0.0499651	8	0.187181
Trial 1	1.3	Rep	M	0:08:38.168-0:08:38.434	IT2	0.0529127	8	0.198226
Trial 1	1.3	Rep	M	0:08:38.434-0:08:38.700	IT2	0.0333891	8	0.125084
Trial 1	1.3	Rep	M	0:08:38.700-0:08:38.966	IT2	0.105696	8	0.39596
Trial 1	1.3	Rep	M	0:08:38.966-0:08:39.232	IT2	0.500247	8	1.87406
Trial 1	1.3	Rep	M	0:08:39.232-0:08:39.498	IT2	0.21024	8	0.787605
Trial 1	1.3	Rep	M	0:08:39.498-0:08:39.764	IT2	0.283901	8	1.06357
Trial 1	1.3	Rep	M	0:08:39.764-0:08:40.030	IT2	0.406484	8	1.52279
Trial 1	1.3	Rep	M	0:08:40.030-0:08:40.296	IT2	0.484513	8	1.8151
Trial 1	1.3	Rep	M	0:08:40.296-0:08:40.562	IT2	0.487923	8	1.82788
Trial 1	1.3	Rep	M	0:08:40.562-0:08:40.828	IT2	0.421211	8	1.57796
Trial 1	1.3	Rep	M	0:08:40.828-0:08:41.094	IT2	1.42311	8	5.33134
Trial 1	1.3	Rep	M	0:08:41.094-0:08:41.360	IT2	1.81092	8	6.78417
Trial 1	1.3	Rep	M	0:08:41.360-0:08:41.626	IT2	0.342148	8	1.28177
Trial 1	1.3	Rep	M	0:08:41.626-0:08:41.892	IT2	0.36958	8	1.38454
Trial 1	1.3	Rep	M	0:08:41.892-0:08:42.158	IT2	1.21046	8	4.53466
Trial 1	1.3	Rep	M	0:08:42.158-0:08:42.424	IT2	0.566301	8	2.12151
Trial 1	1.3	Rep	M	0:08:42.424-0:08:42.690	IT2	1.50503	8	5.63821
Trial 1	1.3	Rep	M	0:08:42.690-0:08:42.956	IT2	1.27206	7	5.44624
Trial 1	1.3	Rep	M	0:08:42.956-0:08:43.222	IT2	0.568043	8	2.12803
Trial 1	1.3	Rep	M	0:08:43.222-0:08:43.488	IT2	0.449045	8	1.68224
Trial 1	1.3	Rep	M	0:08:43.488-0:08:43.754	IT2	0.27081	8	1.01452
Trial 1	1.3	Rep	M	0:08:43.754-0:08:44.020	IT2	0.523862	8	1.96252
Trial 1	1.3	Rep	M	0:08:44.020-0:08:44.286	IT2	0.21883	8	0.819791
Trial 1	1.3	Rep	M	0:08:44.286-0:08:44.552	IT2	1.32883	8	4.97814
Trial 1	1.3	Rep	M	0:08:44.552-0:08:44.818	IT2	0.715414	8	2.68012
Trial 1	1.3	Rep	M	0:08:44.818-0:08:45.084	IT2	0.762105	8	2.85504
Trial 1	1.3	Rep	M	0:08:45.084-0:08:45.350	IT2	1.40036	8	5.2461
Trial 1	1.3	Rep	M	0:08:45.350-0:08:45.616	IT2	1.29934	8	4.86766
Trial 1	1.3	Rep	M	0:08:45.616-0:08:45.882	IT2	0.863494	8	3.23487
Trial 1	1.3	Rep	M	0:08:45.882-0:08:46.148	IT2	0.606985	8	2.27392
Trial 1	1.3	Rep	M	0:08:46.148-0:08:46.414	IT2	0.30453	8	1.14084
Trial 1	1.3	Rep	M	0:08:46.414-0:08:46.680	IT2	0.328969	8	1.23241
Trial 1	1.3	Rep	M	0:08:46.680-0:08:46.946	IT2	0.437544	8	1.63915
Trial 1	1.3	Rep	M	0:08:46.946-0:08:47.212	IT2	0.22075	8	0.826983
Trial 1	1.3	Rep	M	0:08:47.212-0:08:47.478	IT2	0.257101	8	0.963168
Trial 1	1.3	Rep	M	0:08:47.478-0:08:47.744	IT2	0.207219	8	0.776292
Trial 1	1.3	Rep	M	0:08:47.744-0:08:48.010	IT2	0.129975	8	0.486922
Trial 1	1.3	Rep	M	0:08:48.010-0:08:48.276	IT2	0.0622429	8	0.233177
Trial 1	1.3	Rep	M	0:08:48.276-0:08:48.542	IT2	0.220802	8	0.827178
Trial 1	1.3	Rep	M	0:08:48.542-0:08:48.808	IT2	0.313692	8	1.17517
Trial 1	1.3	Rep	M	0:08:48.808-0:08:49.074	IT2	0.139844	8	0.523892
Trial 1	1.3	Rep	M	0:08:49.074-0:08:49.340	IT2	0.0435008	8	0.162966
Trial 1	1.3	Rep	M	0:08:49.340-0:08:49.606	IT2	0.343218	8	1.28578
Trial 1	1.3	Rep	M	0:08:49.606-0:08:49.872	IT2	0.290391	8	1.08788
Trial 1	1.3	Rep	M	0:08:49.872-0:08:50.138	IT2	0.147683	8	0.553257
Trial 1	1.3	Rep	M	0:08:50.138-0:08:50.404	IT2	0.232295	8	0.870236
Trial 1	1.3	Rep	M	0:08:50.404-0:08:50.670	IT2	0.36054	8	1.35068
Trial 1	1.3	Rep	M	0:08:50.670-0:08:50.936	IT2	0.301125	8	1.12808
[truncated: 83,518 more rows]

## Sheet: Day 2
Raw velocity data, extracted via ethovision, which is fed to R source code 1 to detect and extract darts, and to produce velocity traces
Showing Data from Acquisition Day 2 for all animals in Experiment 1
Used to calculate Darts/minute as seen in Figure 2
Trial	Animal	Group	Sex	TimeStamp	StimPeriod	Distance_cm	Samples	Velocity
Trial 1	1.3	Rep	M	Start-0:00:00.266	BL	0.16801	7	0.719326
Trial 1	1.3	Rep	M	0:00:00.266-0:00:00.532	BL	0.0828211	8	0.310268
Trial 1	1.3	Rep	M	0:00:00.532-0:00:00.798	BL	0.0763762	8	0.286123
Trial 1	1.3	Rep	M	0:00:00.798-0:00:01.064	BL	0.0567534	8	0.212612
Trial 1	1.3	Rep	M	0:00:01.064-0:00:01.330	BL	0.0417793	8	0.156515
Trial 1	1.3	Rep	M	0:00:01.330-0:00:01.596	BL	0.0822148	8	0.307999
Trial 1	1.3	Rep	M	0:00:01.596-0:00:01.862	BL	0.0574902	8	0.215373
Trial 1	1.3	Rep	M	0:00:01.862-0:00:02.128	BL	0.0572371	8	0.214424
Trial 1	1.3	Rep	M	0:00:02.128-0:00:02.394	BL	0.0764504	8	0.286403
Trial 1	1.3	Rep	M	0:00:02.394-0:00:02.660	BL	0.056666	8	0.212284
Trial 1	1.3	Rep	M	0:00:02.660-0:00:02.926	BL	0.0703989	8	0.263732
Trial 1	1.3	Rep	M	0:00:02.926-0:00:03.192	BL	0.089566	8	0.335534
Trial 1	1.3	Rep	M	0:00:03.192-0:00:03.458	BL	0.0928991	8	0.348024
Trial 1	1.3	Rep	M	0:00:03.458-0:00:03.724	BL	0.0887096	8	0.33233
Trial 1	1.3	Rep	M	0:00:03.724-0:00:03.990	BL	0.0914954	8	0.342765
Trial 1	1.3	Rep	M	0:00:03.990-0:00:04.256	BL	0.0750405	8	0.28112
Trial 1	1.3	Rep	M	0:00:04.256-0:00:04.522	BL	0.0518068	8	0.194081
Trial 1	1.3	Rep	M	0:00:04.522-0:00:04.788	BL	0.0802491	8	0.300632
Trial 1	1.3	Rep	M	0:00:04.788-0:00:05.054	BL	0.0558482	8	0.209222
Trial 1	1.3	Rep	M	0:00:05.054-0:00:05.320	BL	0.0628066	8	0.235289
Trial 1	1.3	Rep	M	0:00:05.320-0:00:05.586	BL	0.0645177	8	0.2417
Trial 1	1.3	Rep	M	0:00:05.586-0:00:05.852	BL	0.0758775	8	0.284257
Trial 1	1.3	Rep	M	0:00:05.852-0:00:06.118	BL	0.0756896	8	0.28355
Trial 1	1.3	Rep	M	0:00:06.118-0:00:06.384	BL	0.0425034	8	0.159228
Trial 1	1.3	Rep	M	0:00:06.384-0:00:06.650	BL	0.0623819	8	0.233698
Trial 1	1.3	Rep	M	0:00:06.650-0:00:06.916	BL	0.0451454	8	0.169126
Trial 1	1.3	Rep	M	0:00:06.916-0:00:07.182	BL	0.0523521	8	0.196123
Trial 1	1.3	Rep	M	0:00:07.182-0:00:07.448	BL	0.0522412	8	0.195709
Trial 1	1.3	Rep	M	0:00:07.448-0:00:07.714	BL	0.0525867	8	0.197005
Trial 1	1.3	Rep	M	0:00:07.714-0:00:07.980	BL	0.0605606	8	0.226876
Trial 1	1.3	Rep	M	0:00:07.980-0:00:08.246	BL	0.0838889	8	0.314268
Trial 1	1.3	Rep	M	0:00:08.246-0:00:08.512	BL	0.0737699	8	0.27636
Trial 1	1.3	Rep	M	0:00:08.512-0:00:08.778	BL	0.093148	8	0.348954
Trial 1	1.3	Rep	M	0:00:08.778-0:00:09.044	BL	0.0592851	8	0.222097
Trial 1	1.3	Rep	M	0:00:09.044-0:00:09.310	BL	0.0921105	8	0.345068
Trial 1	1.3	Rep	M	0:00:09.310-0:00:09.576	BL	0.115296	7	0.493631
Trial 1	1.3	Rep	M	0:00:09.576-0:00:09.842	BL	0.2353	8	0.88149
Trial 1	1.3	Rep	M	0:00:09.842-0:00:10.108	BL	0.208581	8	0.781395
Trial 1	1.3	Rep	M	0:00:10.108-0:00:10.374	BL	0.105138	8	0.393873
Trial 1	1.3	Rep	M	0:00:10.374-0:00:10.640	BL	0.0637001	8	0.238636
Trial 1	1.3	Rep	M	0:00:10.640-0:00:10.906	BL	0.119205	8	0.446576
Trial 1	1.3	Rep	M	0:00:10.906-0:00:11.172	BL	0.0597399	8	0.2238
Trial 1	1.3	Rep	M	0:00:11.172-0:00:11.438	BL	0.0949006	8	0.355521
Trial 1	1.3	Rep	M	0:00:11.438-0:00:11.704	BL	0.147182	8	0.551378
Trial 1	1.3	Rep	M	0:00:11.704-0:00:11.970	BL	0.155143	8	0.581206
Trial 1	1.3	Rep	M	0:00:11.970-0:00:12.236	BL	0.0997866	8	0.373824
Trial 1	1.3	Rep	M	0:00:12.236-0:00:12.502	BL	0.0950434	8	0.356056
Trial 1	1.3	Rep	M	0:00:12.502-0:00:12.768	BL	0.0708671	8	0.265485
Trial 1	1.3	Rep	M	0:00:12.768-0:00:13.034	BL	0.120635	8	0.45193
Trial 1	1.3	Rep	M	0:00:13.034-0:00:13.300	BL	0.133018	8	0.498319
Trial 1	1.3	Rep	M	0:00:13.300-0:00:13.566	BL	0.0598918	8	0.224368
Trial 1	1.3	Rep	M	0:00:13.566-0:00:13.832	BL	0.112207	8	0.420358
Trial 1	1.3	Rep	M	0:00:13.832-0:00:14.098	BL	0.0520568	8	0.195017
Trial 1	1.3	Rep	M	0:00:14.098-0:00:14.364	BL	0.0628306	8	0.235381
Trial 1	1.3	Rep	M	0:00:14.364-0:00:14.630	BL	0.0941585	8	0.352742
Trial 1	1.3	Rep	M	0:00:14.630-0:00:14.896	BL	0.038828	8	0.145459
Trial 1	1.3	Rep	M	0:00:14.896-0:00:15.162	BL	0.034064	8	0.127613
Trial 1	1.3	Rep	M	0:00:15.162-0:00:15.428	BL	0.082385	8	0.308635
Trial 1	1.3	Rep	M	0:00:15.428-0:00:15.694	BL	0.0390205	8	0.14618
Trial 1	1.3	Rep	M	0:00:15.694-0:00:15.960	BL	0.052262	8	0.195787
Trial 1	1.3	Rep	M	0:00:15.960-0:00:16.226	BL	0.0707896	8	0.265197
Trial 1	1.3	Rep	M	0:00:16.226-0:00:16.492	BL	0.187525	8	0.702517
Trial 1	1.3	Rep	M	0:00:16.492-0:00:16.758	BL	0.200664	8	0.751734
Trial 1	1.3	Rep	M	0:00:16.758-0:00:17.024	BL	0.254899	8	0.954917
Trial 1	1.3	Rep	M	0:00:17.024-0:00:17.290	BL	0.14071	8	0.527135
Trial 1	1.3	Rep	M	0:00:17.290-0:00:17.556	BL	0.196837	8	0.7374
Trial 1	1.3	Rep	M	0:00:17.556-0:00:17.822	BL	0.106107	8	0.397505
Trial 1	1.3	Rep	M	0:00:17.822-0:00:18.088	BL	0.135695	8	0.508349
Trial 1	1.3	Rep	M	0:00:18.088-0:00:18.354	BL	0.135884	8	0.509057
Trial 1	1.3	Rep	M	0:00:18.354-0:00:18.620	BL	0.0580331	8	0.217406
Trial 1	1.3	Rep	M	0:00:18.620-0:00:18.886	BL	0.0710942	8	0.266336
Trial 1	1.3	Rep	M	0:00:18.886-0:00:19.152	BL	0.0356896	7	0.152802
Trial 1	1.3	Rep	M	0:00:19.152-0:00:19.418	BL	0.175447	8	0.657268
Trial 1	1.3	Rep	M	0:00:19.418-0:00:19.684	BL	0.185161	8	0.693659
Trial 1	1.3	Rep	M	0:00:19.684-0:00:19.950	BL	0.124734	8	0.467288
Trial 1	1.3	Rep	M	0:00:19.950-0:00:20.216	BL	0.0514072	8	0.192583
Trial 1	1.3	Rep	M	0:00:20.216-0:00:20.482	BL	0.089551	8	0.33548
Trial 1	1.3	Rep	M	0:00:20.482-0:00:20.748	BL	0.0929706	8	0.348291
Trial 1	1.3	Rep	M	0:00:20.748-0:00:21.014	BL	0.169856	8	0.636321
Trial 1	1.3	Rep	M	0:00:21.014-0:00:21.280	BL	0.21737	8	0.814325
Trial 1	1.3	Rep	M	0:00:21.280-0:00:21.546	BL	0.100936	8	0.378132
Trial 1	1.3	Rep	M	0:00:21.546-0:00:21.812	BL	0.123624	8	0.463128
Trial 1	1.3	Rep	M	0:00:21.812-0:00:22.078	BL	0.0965888	8	0.361846
Trial 1	1.3	Rep	M	0:00:22.078-0:00:22.344	BL	0.0694092	8	0.260024
Trial 1	1.3	Rep	M	0:00:22.344-0:00:22.610	BL	0.0831631	8	0.311551
Trial 1	1.3	Rep	M	0:00:22.610-0:00:22.876	BL	0.123345	8	0.462083
Trial 1	1.3	Rep	M	0:00:22.876-0:00:23.142	BL	0.102941	8	0.385643
Trial 1	1.3	Rep	M	0:00:23.142-0:00:23.408	BL	0.0385412	8	0.144385
Trial 1	1.3	Rep	M	0:00:23.408-0:00:23.674	BL	0.0359782	8	0.134783
Trial 1	1.3	Rep	M	0:00:23.674-0:00:23.940	BL	0.036829	8	0.137971
Trial 1	1.3	Rep	M	0:00:23.940-0:00:24.206	BL	0.0751089	8	0.281377
Trial 1	1.3	Rep	M	0:00:24.206-0:00:24.472	BL	0.166011	8	0.621918
Trial 1	1.3	Rep	M	0:00:24.472-0:00:24.738	BL	0.131488	8	0.492586
Trial 1	1.3	Rep	M	0:00:24.738-0:00:25.004	BL	0.09487	8	0.355409
Trial 1	1.3	Rep	M	0:00:25.004-0:00:25.270	BL	0.0992461	8	0.371801
Trial 1	1.3	Rep	M	0:00:25.270-0:00:25.536	BL	0.087041	8	0.326077
Trial 1	1.3	Rep	M	0:00:25.536-0:00:25.802	BL	0.0541731	8	0.202947
Trial 1	1.3	Rep	M	0:00:25.802-0:00:26.068	BL	0.118075	8	0.442341
Trial 1	1.3	Rep	M	0:00:26.068-0:00:26.334	BL	0.192548	8	0.72133
Trial 1	1.3	Rep	M	0:00:26.334-0:00:26.600	BL	0.130439	8	0.488661
Trial 1	1.3	Rep	M	0:00:26.600-0:00:26.866	BL	0.0302083	8	0.113167
Trial 1	1.3	Rep	M	0:00:26.866-0:00:27.132	BL	0.134077	8	0.502285
Trial 1	1.3	Rep	M	0:00:27.132-0:00:27.398	BL	0.12114	8	0.453822
Trial 1	1.3	Rep	M	0:00:27.398-0:00:27.664	BL	0.159314	8	0.596828
Trial 1	1.3	Rep	M	0:00:27.664-0:00:27.930	BL	0.166822	8	0.624953
Trial 1	1.3	Rep	M	0:00:27.930-0:00:28.196	BL	0.115304	8	0.431955
Trial 1	1.3	Rep	M	0:00:28.196-0:00:28.462	BL	0.118361	8	0.443409
Trial 1	1.3	Rep	M	0:00:28.462-0:00:28.728	BL	0.0724074	7	0.310007
Trial 1	1.3	Rep	M	0:00:28.728-0:00:28.994	BL	0.14848	8	0.556246
Trial 1	1.3	Rep	M	0:00:28.994-0:00:29.260	BL	0.0768308	8	0.287828
Trial 1	1.3	Rep	M	0:00:29.260-0:00:29.526	BL	0.0587717	8	0.220174
Trial 1	1.3	Rep	M	0:00:29.526-0:00:29.792	BL	0.040328	8	0.151079
Trial 1	1.3	Rep	M	0:00:29.792-0:00:30.058	BL	0.140471	8	0.526238
Trial 1	1.3	Rep	M	0:00:30.058-0:00:30.324	BL	0.0756002	8	0.283218
Trial 1	1.3	Rep	M	0:00:30.324-0:00:30.590	BL	0.0964675	8	0.361392
Trial 1	1.3	Rep	M	0:00:30.590-0:00:30.856	BL	0.179115	8	0.67101
Trial 1	1.3	Rep	M	0:00:30.856-0:00:31.122	BL	0.129641	8	0.485663
Trial 1	1.3	Rep	M	0:00:31.122-0:00:31.388	BL	0.115072	8	0.431087
Trial 1	1.3	Rep	M	0:00:31.388-0:00:31.654	BL	0.0511679	8	0.191688
Trial 1	1.3	Rep	M	0:00:31.654-0:00:31.920	BL	0.0998442	8	0.374042
Trial 1	1.3	Rep	M	0:00:31.920-0:00:32.186	BL	0.146816	8	0.550011
Trial 1	1.3	Rep	M	0:00:32.186-0:00:32.452	BL	0.0744242	8	0.278812
Trial 1	1.3	Rep	M	0:00:32.452-0:00:32.718	BL	0.0266088	8	0.0996831
Trial 1	1.3	Rep	M	0:00:32.718-0:00:32.984	BL	0.0104203	8	0.0390371
Trial 1	1.3	Rep	M	0:00:32.984-0:00:33.250	BL	0.0556402	8	0.208443
Trial 1	1.3	Rep	M	0:00:33.250-0:00:33.516	BL	0.0222801	8	0.0834664
Trial 1	1.3	Rep	M	0:00:33.516-0:00:33.782	BL	0.0567568	8	0.212624
Trial 1	1.3	Rep	M	0:00:33.782-0:00:34.048	BL	0.0815581	8	0.305537
Trial 1	1.3	Rep	M	0:00:34.048-0:00:34.314	BL	0.0837284	8	0.313669
Trial 1	1.3	Rep	M	0:00:34.314-0:00:34.580	BL	0.146565	8	0.549069
Trial 1	1.3	Rep	M	0:00:34.580-0:00:34.846	BL	0.114852	8	0.430265
Trial 1	1.3	Rep	M	0:00:34.846-0:00:35.112	BL	0.127164	8	0.476387
Trial 1	1.3	Rep	M	0:00:35.112-0:00:35.378	BL	0.0962995	8	0.360761
Trial 1	1.3	Rep	M	0:00:35.378-0:00:35.644	BL	0.1585	8	0.593786
Trial 1	1.3	Rep	M	0:00:35.644-0:00:35.910	BL	0.119548	8	0.447857
Trial 1	1.3	Rep	M	0:00:35.910-0:00:36.176	BL	0.118184	8	0.442744
Trial 1	1.3	Rep	M	0:00:36.176-0:00:36.442	BL	0.0489049	8	0.18321
Trial 1	1.3	Rep	M	0:00:36.442-0:00:36.708	BL	0.10369	8	0.38845
Trial 1	1.3	Rep	M	0:00:36.708-0:00:36.974	BL	0.0319294	8	0.119616
Trial 1	1.3	Rep	M	0:00:36.974-0:00:37.240	BL	0.0718045	8	0.268997
Trial 1	1.3	Rep	M	0:00:37.240-0:00:37.506	BL	0.0941052	8	0.352542
Trial 1	1.3	Rep	M	0:00:37.506-0:00:37.772	BL	0.0722894	8	0.270812
Trial 1	1.3	Rep	M	0:00:37.772-0:00:38.038	BL	0.181564	7	0.777356
Trial 1	1.3	Rep	M	0:00:38.038-0:00:38.304	BL	0.0914409	8	0.342563
Trial 1	1.3	Rep	M	0:00:38.304-0:00:38.570	BL	0.132376	8	0.495913
Trial 1	1.3	Rep	M	0:00:38.570-0:00:38.836	BL	0.0801249	8	0.300169
Trial 1	1.3	Rep	M	0:00:38.836-0:00:39.102	BL	0.151497	8	0.567547
Trial 1	1.3	Rep	M	0:00:39.102-0:00:39.368	BL	0.139106	8	0.521127
Trial 1	1.3	Rep	M	0:00:39.368-0:00:39.634	BL	0.137596	8	0.515471
Trial 1	1.3	Rep	M	0:00:39.634-0:00:39.900	BL	0.278137	8	1.04197
Trial 1	1.3	Rep	M	0:00:39.900-0:00:40.166	BL	0.237976	8	0.891515
Trial 1	1.3	Rep	M	0:00:40.166-0:00:40.432	BL	0.202766	8	0.759615
Trial 1	1.3	Rep	M	0:00:40.432-0:00:40.698	BL	0.1085	8	0.406465
Trial 1	1.3	Rep	M	0:00:40.698-0:00:40.964	BL	0.150982	8	0.565618
Trial 1	1.3	Rep	M	0:00:40.964-0:00:41.230	BL	0.37901	8	1.41986
Trial 1	1.3	Rep	M	0:00:41.230-0:00:41.496	BL	0.249347	8	0.934119
Trial 1	1.3	Rep	M	0:00:41.496-0:00:41.762	BL	0.115363	8	0.43218
Trial 1	1.3	Rep	M	0:00:41.762-0:00:42.028	BL	0.1945	8	0.728646
Trial 1	1.3	Rep	M	0:00:42.028-0:00:42.294	BL	0.268157	8	1.00459
Trial 1	1.3	Rep	M	0:00:42.294-0:00:42.560	BL	0.240834	8	0.902222
Trial 1	1.3	Rep	M	0:00:42.560-0:00:42.826	BL	1.54621	8	5.79245
Trial 1	1.3	Rep	M	0:00:42.826-0:00:43.092	BL	0.27332	8	1.02393
Trial 1	1.3	Rep	M	0:00:43.092-0:00:43.358	BL	0.194156	8	0.727354
Trial 1	1.3	Rep	M	0:00:43.358-0:00:43.624	BL	0.333577	8	1.24966
Trial 1	1.3	Rep	M	0:00:43.624-0:00:43.890	BL	2.21753	8	8.30742
Trial 1	1.3	Rep	M	0:00:43.890-0:00:44.156	BL	0.893286	8	3.34645
Trial 1	1.3	Rep	M	0:00:44.156-0:00:44.422	BL	0.264761	8	0.991862
Trial 1	1.3	Rep	M	0:00:44.422-0:00:44.688	BL	1.3622	8	5.10311
Trial 1	1.3	Rep	M	0:00:44.688-0:00:44.954	BL	0.194049	8	0.726956
Trial 1	1.3	Rep	M	0:00:44.954-0:00:45.220	BL	0.245325	8	0.919049
Trial 1	1.3	Rep	M	0:00:45.220-0:00:45.486	BL	0.091105	8	0.341301
Trial 1	1.3	Rep	M	0:00:45.486-0:00:45.752	BL	0.351552	8	1.317
Trial 1	1.3	Rep	M	0:00:45.752-0:00:46.018	BL	0.38795	8	1.45335
Trial 1	1.3	Rep	M	0:00:46.018-0:00:46.284	BL	0.973531	8	3.64709
Trial 1	1.3	Rep	M	0:00:46.284-0:00:46.550	BL	1.18923	8	4.45515
Trial 1	1.3	Rep	M	0:00:46.550-0:00:46.816	BL	0.594286	8	2.22634
Trial 1	1.3	Rep	M	0:00:46.816-0:00:47.082	BL	0.544479	8	2.03976
Trial 1	1.3	Rep	M	0:00:47.082-0:00:47.348	BL	0.291177	8	1.09083
Trial 1	1.3	Rep	M	0:00:47.348-0:00:47.614	BL	1.18861	7	5.08896
Trial 1	1.3	Rep	M	0:00:47.614-0:00:47.880	BL	1.4288	8	5.35266
Trial 1	1.3	Rep	M	0:00:47.880-0:00:48.146	BL	2.20441	8	8.25823
Trial 1	1.3	Rep	M	0:00:48.146-0:00:48.412	BL	3.67304	8	13.7601
Trial 1	1.3	Rep	M	0:00:48.412-0:00:48.678	BL	3.4029	8	12.7482
Trial 1	1.3	Rep	M	0:00:48.678-0:00:48.944	BL	1.82291	8	6.82908
Trial 1	1.3	Rep	M	0:00:48.944-0:00:49.210	BL	1.88524	8	7.0626
Trial 1	1.3	Rep	M	0:00:49.210-0:00:49.476	BL	0.87123	8	3.26383
Trial 1	1.3	Rep	M	0:00:49.476-0:00:49.742	BL	0.230073	8	0.861911
Trial 1	1.3	Rep	M	0:00:49.742-0:00:50.008	BL	0.331292	8	1.2411
Trial 1	1.3	Rep	M	0:00:50.008-0:00:50.274	BL	0.992091	8	3.71662
Trial 1	1.3	Rep	M	0:00:50.274-0:00:50.540	BL	0.680616	8	2.54976
Trial 1	1.3	Rep	M	0:00:50.540-0:00:50.806	BL	0.547806	8	2.05221
Trial 1	1.3	Rep	M	0:00:50.806-0:00:51.072	BL	0.775919	8	2.90679
Trial 1	1.3	Rep	M	0:00:51.072-0:00:51.338	BL	1.10771	8	4.1498
Trial 1	1.3	Rep	M	0:00:51.338-0:00:51.604	BL	0.550207	8	2.06121
Trial 1	1.3	Rep	M	0:00:51.604-0:00:51.870	BL	0.562588	8	2.1076
Trial 1	1.3	Rep	M	0:00:51.870-0:00:52.136	BL	0.309305	8	1.15873
Trial 1	1.3	Rep	M	0:00:52.136-0:00:52.402	BL	0.566453	8	2.12208
Trial 1	1.3	Rep	M	0:00:52.402-0:00:52.668	BL	0.980266	8	3.67232
Trial 1	1.3	Rep	M	0:00:52.668-0:00:52.934	BL	0.498408	8	1.86716
Trial 1	1.3	Rep	M	0:00:52.934-0:00:53.200	BL	0.352003	8	1.31869
Trial 1	1.3	Rep	M	0:00:53.200-0:00:53.466	BL	0.649188	8	2.43202
Trial 1	1.3	Rep	M	0:00:53.466-0:00:53.732	BL	0.904643	8	3.389
Trial 1	1.3	Rep	M	0:00:53.732-0:00:53.998	BL	0.40545	8	1.51892
Trial 1	1.3	Rep	M	0:00:53.998-0:00:54.264	BL	0.345099	8	1.29282
Trial 1	1.3	Rep	M	0:00:54.264-0:00:54.530	BL	0.233775	8	0.875781
Trial 1	1.3	Rep	M	0:00:54.530-0:00:54.796	BL	0.19557	8	0.732652
Trial 1	1.3	Rep	M	0:00:54.796-0:00:55.062	BL	0.509754	8	1.90966
Trial 1	1.3	Rep	M	0:00:55.062-0:00:55.328	BL	0.743915	8	2.78689
Trial 1	1.3	Rep	M	0:00:55.328-0:00:55.594	BL	0.792377	8	2.96843
Trial 1	1.3	Rep	M	0:00:55.594-0:00:55.860	BL	1.11054	8	4.16036
Trial 1	1.3	Rep	M	0:00:55.860-0:00:56.126	BL	0.924628	8	3.46389
Trial 1	1.3	Rep	M	0:00:56.126-0:00:56.392	BL	1.16197	8	4.353
Trial 1	1.3	Rep	M	0:00:56.392-0:00:56.658	BL	1.02639	8	3.84515
Trial 1	1.3	Rep	M	0:00:56.658-0:00:56.924	BL	0.620152	8	2.32324
Trial 1	1.3	Rep	M	0:00:56.924-0:00:57.190	BL	0.693899	7	2.97088
Trial 1	1.3	Rep	M	0:00:57.190-0:00:57.456	BL	0.669573	8	2.50839
Trial 1	1.3	Rep	M	0:00:57.456-0:00:57.722	BL	0.79272	8	2.96972
Trial 1	1.3	Rep	M	0:00:57.722-0:00:57.988	BL	2.10239	8	7.87609
Trial 1	1.3	Rep	M	0:00:57.988-0:00:58.254	BL	3.52653	8	13.2112
Trial 1	1.3	Rep	M	0:00:58.254-0:00:58.520	BL	2.9651	8	11.108
Trial 1	1.3	Rep	M	0:00:58.520-0:00:58.786	BL	2.66062	8	9.96738
Trial 1	1.3	Rep	M	0:00:58.786-0:00:59.052	BL	3.09649	8	11.6002
Trial 1	1.3	Rep	M	0:00:59.052-0:00:59.318	BL	3.23979	8	12.1371
Trial 1	1.3	Rep	M	0:00:59.318-0:00:59.584	BL	2.4195	8	9.06405
Trial 1	1.3	Rep	M	0:00:59.584-0:00:59.850	BL	2.17125	8	8.13402
Trial 1	1.3	Rep	M	0:00:59.850-0:01:00.116	BL	0.404981	8	1.51716
Trial 1	1.3	Rep	M	0:01:00.116-0:01:00.382	BL	0.195644	8	0.73293
Trial 1	1.3	Rep	M	0:01:00.382-0:01:00.648	BL	0.133014	8	0.498307
Trial 1	1.3	Rep	M	0:01:00.648-0:01:00.914	BL	0.302194	8	1.13209
Trial 1	1.3	Rep	M	0:01:00.914-0:01:01.180	BL	0.237044	8	0.888025
Trial 1	1.3	Rep	M	0:01:01.180-0:01:01.446	BL	0.454259	8	1.70177
Trial 1	1.3	Rep	M	0:01:01.446-0:01:01.712	BL	0.723175	8	2.70918
Trial 1	1.3	Rep	M	0:01:01.712-0:01:01.978	BL	0.55166	8	2.06666
Trial 1	1.3	Rep	M	0:01:01.978-0:01:02.244	BL	0.658597	8	2.46726
Trial 1	1.3	Rep	M	0:01:02.244-0:01:02.510	BL	1.00402	8	3.76131
Trial 1	1.3	Rep	M	0:01:02.510-0:01:02.776	BL	0.685601	8	2.56843
Trial 1	1.3	Rep	M	0:01:02.776-0:01:03.042	BL	0.20757	8	0.777608
Trial 1	1.3	Rep	M	0:01:03.042-0:01:03.308	BL	0.343393	8	1.28643
Trial 1	1.3	Rep	M	0:01:03.308-0:01:03.574	BL	0.206534	8	0.773722
Trial 1	1.3	Rep	M	0:01:03.574-0:01:03.840	BL	0.343796	8	1.28794
Trial 1	1.3	Rep	M	0:01:03.840-0:01:04.106	BL	0.430451	8	1.61259
Trial 1	1.3	Rep	M	0:01:04.106-0:01:04.372	BL	0.263973	8	0.98891
Trial 1	1.3	Rep	M	0:01:04.372-0:01:04.638	BL	0.413333	8	1.54846
Trial 1	1.3	Rep	M	0:01:04.638-0:01:04.904	BL	0.268953	8	1.00756
Trial 1	1.3	Rep	M	0:01:04.904-0:01:05.170	BL	0.618922	8	2.31864
Trial 1	1.3	Rep	M	0:01:05.170-0:01:05.436	BL	0.151821	8	0.568761
Trial 1	1.3	Rep	M	0:01:05.436-0:01:05.702	BL	0.160734	8	0.602149
Trial 1	1.3	Rep	M	0:01:05.702-0:01:05.968	BL	0.40581	8	1.52027
Trial 1	1.3	Rep	M	0:01:05.968-0:01:06.234	BL	0.495859	8	1.85761
Trial 1	1.3	Rep	M	0:01:06.234-0:01:06.500	BL	0.365031	8	1.3675
Trial 1	1.3	Rep	M	0:01:06.500-0:01:06.766	BL	0.374113	7	1.60173
Trial 1	1.3	Rep	M	0:01:06.766-0:01:07.032	BL	0.340403	8	1.27524
Trial 1	1.3	Rep	M	0:01:07.032-0:01:07.298	BL	0.174641	8	0.654245
Trial 1	1.3	Rep	M	0:01:07.298-0:01:07.564	BL	0.137337	8	0.514498
Trial 1	1.3	Rep	M	0:01:07.564-0:01:07.830	BL	0.109543	8	0.410378
Trial 1	1.3	Rep	M	0:01:07.830-0:01:08.096	BL	0.270818	8	1.01456
Trial 1	1.3	Rep	M	0:01:08.096-0:01:08.362	BL	0.228926	8	0.85762
Trial 1	1.3	Rep	M	0:01:08.362-0:01:08.628	BL	0.313013	8	1.17262
Trial 1	1.3	Rep	M	0:01:08.628-0:01:08.894	BL	0.534966	8	2.00411
Trial 1	1.3	Rep	M	0:01:08.894-0:01:09.160	BL	0.979294	8	3.66867
Trial 1	1.3	Rep	M	0:01:09.160-0:01:09.426	BL	0.71642	8	2.68387
Trial 1	1.3	Rep	M	0:01:09.426-0:01:09.692	BL	0.515156	8	1.92991
Trial 1	1.3	Rep	M	0:01:09.692-0:01:09.958	BL	0.185148	8	0.693607
Trial 1	1.3	Rep	M	0:01:09.958-0:01:10.224	BL	0.110289	8	0.413171
Trial 1	1.3	Rep	M	0:01:10.224-0:01:10.490	BL	0.205651	8	0.770414
Trial 1	1.3	Rep	M	0:01:10.490-0:01:10.756	BL	0.27715	8	1.03827
Trial 1	1.3	Rep	M	0:01:10.756-0:01:11.022	BL	0.209384	8	0.78441
Trial 1	1.3	Rep	M	0:01:11.022-0:01:11.288	BL	0.0719	8	0.269354
Trial 1	1.3	Rep	M	0:01:11.288-0:01:11.554	BL	0.13881	8	0.52002
Trial 1	1.3	Rep	M	0:01:11.554-0:01:11.820	BL	0.214581	8	0.803874
Trial 1	1.3	Rep	M	0:01:11.820-0:01:12.086	BL	0.225343	8	0.844187
Trial 1	1.3	Rep	M	0:01:12.086-0:01:12.352	BL	0.205458	8	0.769693
Trial 1	1.3	Rep	M	0:01:12.352-0:01:12.618	BL	0.197789	8	0.740966
Trial 1	1.3	Rep	M	0:01:12.618-0:01:12.884	BL	0.162183	8	0.607577
Trial 1	1.3	Rep	M	0:01:12.884-0:01:13.150	BL	0.263367	8	0.986634
Trial 1	1.3	Rep	M	0:01:13.150-0:01:13.416	BL	0.427793	8	1.60262
Trial 1	1.3	Rep	M	0:01:13.416-0:01:13.682	BL	0.322044	8	1.20646
Trial 1	1.3	Rep	M	0:01:13.682-0:01:13.948	BL	0.556039	8	2.08305
Trial 1	1.3	Rep	M	0:01:13.948-0:01:14.214	BL	0.729099	8	2.73138
Trial 1	1.3	Rep	M	0:01:14.214-0:01:14.480	BL	0.275933	8	1.03371
Trial 1	1.3	Rep	M	0:01:14.480-0:01:14.746	BL	0.566371	8	2.12176
Trial 1	1.3	Rep	M	0:01:14.746-0:01:15.012	BL	0.29782	8	1.11571
Trial 1	1.3	Rep	M	0:01:15.012-0:01:15.278	BL	0.44548	8	1.66888
Trial 1	1.3	Rep	M	0:01:15.278-0:01:15.544	BL	0.248026	8	0.929177
Trial 1	1.3	Rep	M	0:01:15.544-0:01:15.810	BL	0.145806	8	0.546223
Trial 1	1.3	Rep	M	0:01:15.810-0:01:16.076	BL	0.0628782	7	0.269208
Trial 1	1.3	Rep	M	0:01:16.076-0:01:16.342	BL	0.107405	8	0.402365
Trial 1	1.3	Rep	M	0:01:16.342-0:01:16.608	BL	0.132262	8	0.495485
Trial 1	1.3	Rep	M	0:01:16.608-0:01:16.874	BL	0.117738	8	0.441074
Trial 1	1.3	Rep	M	0:01:16.874-0:01:17.140	BL	0.857782	8	3.21349
Trial 1	1.3	Rep	M	0:01:17.140-0:01:17.406	BL	0.387641	8	1.4522
Trial 1	1.3	Rep	M	0:01:17.406-0:01:17.672	BL	0.27158	8	1.01741
Trial 1	1.3	Rep	M	0:01:17.672-0:01:17.938	BL	0.198148	8	0.742312
Trial 1	1.3	Rep	M	0:01:17.938-0:01:18.204	BL	0.192696	8	0.721889
Trial 1	1.3	Rep	M	0:01:18.204-0:01:18.470	BL	0.128066	8	0.479766
Trial 1	1.3	Rep	M	0:01:18.470-0:01:18.736	BL	0.212204	8	0.794962
Trial 1	1.3	Rep	M	0:01:18.736-0:01:19.002	BL	0.208227	8	0.780069
Trial 1	1.3	Rep	M	0:01:19.002-0:01:19.268	BL	0.275031	8	1.03034
Trial 1	1.3	Rep	M	0:01:19.268-0:01:19.534	BL	0.196646	8	0.736682
Trial 1	1.3	Rep	M	0:01:19.534-0:01:19.800	BL	0.234994	8	0.880351
Trial 1	1.3	Rep	M	0:01:19.800-0:01:20.066	BL	0.289327	8	1.08389
Trial 1	1.3	Rep	M	0:01:20.066-0:01:20.332	BL	0.305458	8	1.14432
Trial 1	1.3	Rep	M	0:01:20.332-0:01:20.598	BL	0.875889	8	3.2813
Trial 1	1.3	Rep	M	0:01:20.598-0:01:20.864	BL	0.342343	8	1.2825
Trial 1	1.3	Rep	M	0:01:20.864-0:01:21.130	BL	0.321742	8	1.20532
Trial 1	1.3	Rep	M	0:01:21.130-0:01:21.396	BL	0.141035	8	0.528351
Trial 1	1.3	Rep	M	0:01:21.396-0:01:21.662	BL	0.0850216	8	0.318514
Trial 1	1.3	Rep	M	0:01:21.662-0:01:21.928	BL	0.273378	8	1.02414
Trial 1	1.3	Rep	M	0:01:21.928-0:01:22.194	BL	0.223964	8	0.83902
Trial 1	1.3	Rep	M	0:01:22.194-0:01:22.460	BL	0.540793	8	2.02595
Trial 1	1.3	Rep	M	0:01:22.460-0:01:22.726	BL	1.2558	8	4.70455
Trial 1	1.3	Rep	M	0:01:22.726-0:01:22.992	BL	0.410657	8	1.53843
Trial 1	1.3	Rep	M	0:01:22.992-0:01:23.258	BL	0.153858	8	0.576393
Trial 1	1.3	Rep	M	0:01:23.258-0:01:23.524	BL	0.151008	8	0.565713
Trial 1	1.3	Rep	M	0:01:23.524-0:01:23.790	BL	0.0810713	8	0.303715
Trial 1	1.3	Rep	M	0:01:23.790-0:01:24.056	BL	0.0928617	8	0.347881
Trial 1	1.3	Rep	M	0:01:24.056-0:01:24.322	BL	0.0922532	8	0.345603
Trial 1	1.3	Rep	M	0:01:24.322-0:01:24.588	BL	0.0867336	8	0.324925
Trial 1	1.3	Rep	M	0:01:24.588-0:01:24.854	BL	0.259464	8	0.972012
Trial 1	1.3	Rep	M	0:01:24.854-0:01:25.120	BL	0.318881	8	1.19461
Trial 1	1.3	Rep	M	0:01:25.120-0:01:25.386	BL	0.28281	8	1.05947
Trial 1	1.3	Rep	M	0:01:25.386-0:01:25.652	BL	0.212513	7	0.909858
Trial 1	1.3	Rep	M	0:01:25.652-0:01:25.918	BL	0.260735	8	0.976779
Trial 1	1.3	Rep	M	0:01:25.918-0:01:26.184	BL	0.1193	8	0.44693
Trial 1	1.3	Rep	M	0:01:26.184-0:01:26.450	BL	0.110164	8	0.412705
Trial 1	1.3	Rep	M	0:01:26.450-0:01:26.716	BL	0.188716	8	0.706975
Trial 1	1.3	Rep	M	0:01:26.716-0:01:26.982	BL	0.202164	8	0.757357
Trial 1	1.3	Rep	M	0:01:26.982-0:01:27.248	BL	0.347912	8	1.30337
Trial 1	1.3	Rep	M	0:01:27.248-0:01:27.514	BL	0.149151	8	0.558759
Trial 1	1.3	Rep	M	0:01:27.514-0:01:27.780	BL	0.265216	8	0.993562
Trial 1	1.3	Rep	M	0:01:27.780-0:01:28.046	BL	0.29929	8	1.12121
Trial 1	1.3	Rep	M	0:01:28.046-0:01:28.312	BL	0.377367	8	1.4137
Trial 1	1.3	Rep	M	0:01:28.312-0:01:28.578	BL	0.293884	8	1.10096
Trial 1	1.3	Rep	M	0:01:28.578-0:01:28.844	BL	0.107067	8	0.401099
Trial 1	1.3	Rep	M	0:01:28.844-0:01:29.110	BL	0.242714	8	0.909272
Trial 1	1.3	Rep	M	0:01:29.110-0:01:29.376	BL	0.144286	8	0.540535
Trial 1	1.3	Rep	M	0:01:29.376-0:01:29.642	BL	0.148574	8	0.556595
Trial 1	1.3	Rep	M	0:01:29.642-0:01:29.908	BL	0.144794	8	0.542435
Trial 1	1.3	Rep	M	0:01:29.908-0:01:30.174	BL	0.159569	8	0.597781
Trial 1	1.3	Rep	M	0:01:30.174-0:01:30.440	BL	0.103024	8	0.385953
Trial 1	1.3	Rep	M	0:01:30.440-0:01:30.706	BL	0.234381	8	0.878051
Trial 1	1.3	Rep	M	0:01:30.706-0:01:30.972	BL	0.150494	8	0.563785
Trial 1	1.3	Rep	M	0:01:30.972-0:01:31.238	BL	0.169908	8	0.636521
Trial 1	1.3	Rep	M	0:01:31.238-0:01:31.504	BL	0.0987977	8	0.370119
Trial 1	1.3	Rep	M	0:01:31.504-0:01:31.770	BL	0.0915538	8	0.342984
Trial 1	1.3	Rep	M	0:01:31.770-0:01:32.036	BL	0.0640373	8	0.239899
Trial 1	1.3	Rep	M	0:01:32.036-0:01:32.302	BL	0.0732683	8	0.274482
Trial 1	1.3	Rep	M	0:01:32.302-0:01:32.568	BL	0.146053	8	0.547152
Trial 1	1.3	Rep	M	0:01:32.568-0:01:32.834	BL	0.0858915	8	0.32177
Trial 1	1.3	Rep	M	0:01:32.834-0:01:33.100	BL	0.0934129	8	0.349946
Trial 1	1.3	Rep	M	0:01:33.100-0:01:33.366	BL	0.23329	8	0.87396
Trial 1	1.3	Rep	M	0:01:33.366-0:01:33.632	BL	0.242343	8	0.907877
Trial 1	1.3	Rep	M	0:01:33.632-0:01:33.898	BL	0.192718	8	0.721975
Trial 1	1.3	Rep	M	0:01:33.898-0:01:34.164	BL	0.139281	8	0.521782
Trial 1	1.3	Rep	M	0:01:34.164-0:01:34.430	BL	0.185887	8	0.696379
Trial 1	1.3	Rep	M	0:01:34.430-0:01:34.696	BL	0.136347	8	0.510791
Trial 1	1.3	Rep	M	0:01:34.696-0:01:34.962	BL	0.133349	8	0.499557
Trial 1	1.3	Rep	M	0:01:34.962-0:01:35.228	BL	0.165969	7	0.710581
Trial 1	1.3	Rep	M	0:01:35.228-0:01:35.494	BL	0.0686807	8	0.257295
Trial 1	1.3	Rep	M	0:01:35.494-0:01:35.760	BL	0.0998736	8	0.374151
Trial 1	1.3	Rep	M	0:01:35.760-0:01:36.026	BL	0.0514591	8	0.192778
Trial 1	1.3	Rep	M	0:01:36.026-0:01:36.292	BL	0.328748	8	1.23157
Trial 1	1.3	Rep	M	0:01:36.292-0:01:36.558	BL	0.233465	8	0.874616
Trial 1	1.3	Rep	M	0:01:36.558-0:01:36.824	BL	0.365664	8	1.36987
Trial 1	1.3	Rep	M	0:01:36.824-0:01:37.090	BL	0.171492	8	0.642451
Trial 1	1.3	Rep	M	0:01:37.090-0:01:37.356	BL	0.215175	8	0.806099
Trial 1	1.3	Rep	M	0:01:37.356-0:01:37.622	BL	0.277263	8	1.03869
Trial 1	1.3	Rep	M	0:01:37.622-0:01:37.888	BL	0.147209	8	0.551483
Trial 1	1.3	Rep	M	0:01:37.888-0:01:38.154	BL	0.300311	8	1.12504
Trial 1	1.3	Rep	M	0:01:38.154-0:01:38.420	BL	0.0973395	8	0.364658
Trial 1	1.3	Rep	M	0:01:38.420-0:01:38.686	BL	0.211493	8	0.792312
Trial 1	1.3	Rep	M	0:01:38.686-0:01:38.952	BL	0.122299	8	0.458161
Trial 1	1.3	Rep	M	0:01:38.952-0:01:39.218	BL	0.136359	8	0.510834
Trial 1	1.3	Rep	M	0:01:39.218-0:01:39.484	BL	0.0857882	8	0.321385
Trial 1	1.3	Rep	M	0:01:39.484-0:01:39.750	BL	0.181917	8	0.681503
Trial 1	1.3	Rep	M	0:01:39.750-0:01:40.016	BL	0.108851	8	0.407783
Trial 1	1.3	Rep	M	0:01:40.016-0:01:40.282	BL	0.0797001	8	0.298575
Trial 1	1.3	Rep	M	0:01:40.282-0:01:40.548	BL	0.182478	8	0.683603
Trial 1	1.3	Rep	M	0:01:40.548-0:01:40.814	BL	0.0315207	8	0.118085
Trial 1	1.3	Rep	M	0:01:40.814-0:01:41.080	BL	0.23204	8	0.869285
Trial 1	1.3	Rep	M	0:01:41.080-0:01:41.346	BL	0.0889247	8	0.333136
Trial 1	1.3	Rep	M	0:01:41.346-0:01:41.612	BL	0.169865	8	0.636353
Trial 1	1.3	Rep	M	0:01:41.612-0:01:41.878	BL	0.14225	8	0.532904
Trial 1	1.3	Rep	M	0:01:41.878-0:01:42.144	BL	0.128341	8	0.480796
Trial 1	1.3	Rep	M	0:01:42.144-0:01:42.410	BL	0.0508033	8	0.190321
Trial 1	1.3	Rep	M	0:01:42.410-0:01:42.676	BL	0.0282344	8	0.105775
Trial 1	1.3	Rep	M	0:01:42.676-0:01:42.942	BL	0.150893	8	0.565281
Trial 1	1.3	Rep	M	0:01:42.942-0:01:43.208	BL	0.066089	8	0.247585
Trial 1	1.3	Rep	M	0:01:43.208-0:01:43.474	BL	0.313816	8	1.17563
Trial 1	1.3	Rep	M	0:01:43.474-0:01:43.740	BL	0.0650438	8	0.24367
Trial 1	1.3	Rep	M	0:01:43.740-0:01:44.006	BL	0.146441	8	0.548609
Trial 1	1.3	Rep	M	0:01:44.006-0:01:44.272	BL	0.194419	8	0.728341
Trial 1	1.3	Rep	M	0:01:44.272-0:01:44.538	BL	0.18676	8	0.699644
Trial 1	1.3	Rep	M	0:01:44.538-0:01:44.804	BL	0.34531	7	1.47842
Trial 1	1.3	Rep	M	0:01:44.804-0:01:45.070	BL	0.185674	8	0.695582
Trial 1	1.3	Rep	M	0:01:45.070-0:01:45.336	BL	0.220789	8	0.827126
Trial 1	1.3	Rep	M	0:01:45.336-0:01:45.602	BL	0.19511	8	0.730926
Trial 1	1.3	Rep	M	0:01:45.602-0:01:45.868	BL	0.222857	8	0.834878
Trial 1	1.3	Rep	M	0:01:45.868-0:01:46.134	BL	0.192849	8	0.722461
Trial 1	1.3	Rep	M	0:01:46.134-0:01:46.400	BL	0.239016	8	0.895417
Trial 1	1.3	Rep	M	0:01:46.400-0:01:46.666	BL	0.318033	8	1.19143
Trial 1	1.3	Rep	M	0:01:46.666-0:01:46.932	BL	0.226165	8	0.847276
Trial 1	1.3	Rep	M	0:01:46.932-0:01:47.198	BL	0.219926	8	0.823897
Trial 1	1.3	Rep	M	0:01:47.198-0:01:47.464	BL	0.162054	8	0.607092
Trial 1	1.3	Rep	M	0:01:47.464-0:01:47.730	BL	0.18164	8	0.680471
Trial 1	1.3	Rep	M	0:01:47.730-0:01:47.996	BL	0.174086	8	0.652169
Trial 1	1.3	Rep	M	0:01:47.996-0:01:48.262	BL	0.150292	8	0.563031
Trial 1	1.3	Rep	M	0:01:48.262-0:01:48.528	BL	0.145324	8	0.544419
Trial 1	1.3	Rep	M	0:01:48.528-0:01:48.794	BL	0.163673	8	0.613156
Trial 1	1.3	Rep	M	0:01:48.794-0:01:49.060	BL	0.0920359	8	0.344791
Trial 1	1.3	Rep	M	0:01:49.060-0:01:49.326	BL	0.0544534	8	0.203995
Trial 1	1.3	Rep	M	0:01:49.326-0:01:49.592	BL	0.0600462	8	0.22495
Trial 1	1.3	Rep	M	0:01:49.592-0:01:49.858	BL	0.133045	8	0.498419
Trial 1	1.3	Rep	M	0:01:49.858-0:01:50.124	BL	0.186258	8	0.697769
Trial 1	1.3	Rep	M	0:01:50.124-0:01:50.390	BL	0.0824022	8	0.308701
Trial 1	1.3	Rep	M	0:01:50.390-0:01:50.656	BL	0.153374	8	0.574581
Trial 1	1.3	Rep	M	0:01:50.656-0:01:50.922	BL	0.049443	8	0.185225
Trial 1	1.3	Rep	M	0:01:50.922-0:01:51.188	BL	0.175426	8	0.657187
Trial 1	1.3	Rep	M	0:01:51.188-0:01:51.454	BL	0.0957574	8	0.358729
Trial 1	1.3	Rep	M	0:01:51.454-0:01:51.720	BL	0.326029	8	1.22138
Trial 1	1.3	Rep	M	0:01:51.720-0:01:51.986	BL	0.341745	8	1.28026
Trial 1	1.3	Rep	M	0:01:51.986-0:01:52.252	BL	0.154561	8	0.579021
Trial 1	1.3	Rep	M	0:01:52.252-0:01:52.518	BL	0.203567	8	0.76261
Trial 1	1.3	Rep	M	0:01:52.518-0:01:52.784	BL	0.190725	8	0.714505
Trial 1	1.3	Rep	M	0:01:52.784-0:01:53.050	BL	0.148787	8	0.557395
Trial 1	1.3	Rep	M	0:01:53.050-0:01:53.316	BL	0.121305	8	0.454438
Trial 1	1.3	Rep	M	0:01:53.316-0:01:53.582	BL	0.197556	8	0.740093
Trial 1	1.3	Rep	M	0:01:53.582-0:01:53.848	BL	0.0639026	8	0.239394
Trial 1	1.3	Rep	M	0:01:53.848-0:01:54.114	BL	0.0611151	7	0.26166
Trial 1	1.3	Rep	M	0:01:54.114-0:01:54.380	BL	0.411558	8	1.5418
Trial 1	1.3	Rep	M	0:01:54.380-0:01:54.646	BL	0.288442	8	1.08058
Trial 1	1.3	Rep	M	0:01:54.646-0:01:54.912	BL	0.196882	8	0.737569
Trial 1	1.3	Rep	M	0:01:54.912-0:01:55.178	BL	0.0570196	8	0.213609
Trial 1	1.3	Rep	M	0:01:55.178-0:01:55.444	BL	0.170519	8	0.638803
Trial 1	1.3	Rep	M	0:01:55.444-0:01:55.710	BL	0.0846773	8	0.317223
Trial 1	1.3	Rep	M	0:01:55.710-0:01:55.976	BL	0.12809	8	0.479861
Trial 1	1.3	Rep	M	0:01:55.976-0:01:56.242	BL	0.107589	8	0.403053
Trial 1	1.3	Rep	M	0:01:56.242-0:01:56.508	BL	0.0796351	8	0.298333
Trial 1	1.3	Rep	M	0:01:56.508-0:01:56.774	BL	0.243707	8	0.912988
Trial 1	1.3	Rep	M	0:01:56.774-0:01:57.040	BL	0.0515539	8	0.193134
Trial 1	1.3	Rep	M	0:01:57.040-0:01:57.306	BL	0.171668	8	0.643107
Trial 1	1.3	Rep	M	0:01:57.306-0:01:57.572	BL	0.195615	8	0.732818
Trial 1	1.3	Rep	M	0:01:57.572-0:01:57.838	BL	0.217473	8	0.81471
Trial 1	1.3	Rep	M	0:01:57.838-0:01:58.104	BL	0.15446	8	0.578645
Trial 1	1.3	Rep	M	0:01:58.104-0:01:58.370	BL	0.131709	8	0.493417
Trial 1	1.3	Rep	M	0:01:58.370-0:01:58.636	BL	0.131108	8	0.491163
Trial 1	1.3	Rep	M	0:01:58.636-0:01:58.902	BL	0.191868	8	0.718786
Trial 1	1.3	Rep	M	0:01:58.902-0:01:59.168	BL	0.213715	8	0.800633
Trial 1	1.3	Rep	M	0:01:59.168-0:01:59.434	BL	0.269551	8	1.0098
Trial 1	1.3	Rep	M	0:01:59.434-0:01:59.700	BL	0.312544	8	1.17087
Trial 1	1.3	Rep	M	0:01:59.700-0:01:59.966	BL	0.0702612	8	0.263215
Trial 1	1.3	Rep	M	0:01:59.966-0:02:00.232	BL	0.308997	8	1.15757
Trial 1	1.3	Rep	M	0:02:00.232-0:02:00.498	BL	0.302299	8	1.13249
Trial 1	1.3	Rep	M	0:02:00.498-0:02:00.764	BL	0.466798	8	1.74873
Trial 1	1.3	Rep	M	0:02:00.764-0:02:01.030	BL	0.650053	8	2.43527
Trial 1	1.3	Rep	M	0:02:01.030-0:02:01.296	BL	0.816419	8	3.05849
Trial 1	1.3	Rep	M	0:02:01.296-0:02:01.562	BL	0.340705	8	1.27636
Trial 1	1.3	Rep	M	0:02:01.562-0:02:01.828	BL	0.496762	8	1.86099
Trial 1	1.3	Rep	M	0:02:01.828-0:02:02.094	BL	0.741385	8	2.77741
Trial 1	1.3	Rep	M	0:02:02.094-0:02:02.360	BL	0.298697	8	1.11899
Trial 1	1.3	Rep	M	0:02:02.360-0:02:02.626	BL	0.734896	8	2.75311
Trial 1	1.3	Rep	M	0:02:02.626-0:02:02.892	BL	0.452665	8	1.69579
Trial 1	1.3	Rep	M	0:02:02.892-0:02:03.158	BL	0.209962	8	0.786574
Trial 1	1.3	Rep	M	0:02:03.158-0:02:03.424	BL	0.445251	8	1.66801
Trial 1	1.3	Rep	M	0:02:03.424-0:02:03.690	BL	0.581995	7	2.49176
Trial 1	1.3	Rep	M	0:02:03.690-0:02:03.956	BL	0.403355	8	1.51107
Trial 1	1.3	Rep	M	0:02:03.956-0:02:04.222	BL	0.478205	8	1.79147
Trial 1	1.3	Rep	M	0:02:04.222-0:02:04.488	BL	2.10394	8	7.88186
Trial 1	1.3	Rep	M	0:02:04.488-0:02:04.754	BL	0.648217	8	2.42839
Trial 1	1.3	Rep	M	0:02:04.754-0:02:05.020	BL	1.68186	8	6.30071
Trial 1	1.3	Rep	M	0:02:05.020-0:02:05.286	BL	0.633674	8	2.37391
Trial 1	1.3	Rep	M	0:02:05.286-0:02:05.552	BL	0.448167	8	1.67895
Trial 1	1.3	Rep	M	0:02:05.552-0:02:05.818	BL	0.40138	8	1.50368
Trial 1	1.3	Rep	M	0:02:05.818-0:02:06.084	BL	1.54043	8	5.77083
Trial 1	1.3	Rep	M	0:02:06.084-0:02:06.350	BL	1.41318	8	5.29411
Trial 1	1.3	Rep	M	0:02:06.350-0:02:06.616	BL	1.64038	8	6.14527
Trial 1	1.3	Rep	M	0:02:06.616-0:02:06.882	BL	2.17347	8	8.14233
Trial 1	1.3	Rep	M	0:02:06.882-0:02:07.148	BL	1.84675	8	6.91839
Trial 1	1.3	Rep	M	0:02:07.148-0:02:07.414	BL	0.854721	8	3.20201
Trial 1	1.3	Rep	M	0:02:07.414-0:02:07.680	BL	2.07121	8	7.75925
Trial 1	1.3	Rep	M	0:02:07.680-0:02:07.946	BL	3.51378	8	13.1635
Trial 1	1.3	Rep	M	0:02:07.946-0:02:08.212	BL	4.7975	8	17.9726
Trial 1	1.3	Rep	M	0:02:08.212-0:02:08.478	BL	4.64781	8	17.4118
Trial 1	1.3	Rep	M	0:02:08.478-0:02:08.744	BL	2.47598	8	9.27565
Trial 1	1.3	Rep	M	0:02:08.744-0:02:09.010	BL	0.850963	8	3.18792
Trial 1	1.3	Rep	M	0:02:09.010-0:02:09.276	BL	0.416817	8	1.5615
Trial 1	1.3	Rep	M	0:02:09.276-0:02:09.542	BL	0.434589	8	1.62808
Trial 1	1.3	Rep	M	0:02:09.542-0:02:09.808	BL	0.376478	8	1.41038
Trial 1	1.3	Rep	M	0:02:09.808-0:02:10.074	BL	0.0915841	8	0.343099
Trial 1	1.3	Rep	M	0:02:10.074-0:02:10.340	BL	0.0900196	8	0.337234
Trial 1	1.3	Rep	M	0:02:10.340-0:02:10.606	BL	0.0754659	8	0.282713
Trial 1	1.3	Rep	M	0:02:10.606-0:02:10.872	BL	0.185413	8	0.694603
Trial 1	1.3	Rep	M	0:02:10.872-0:02:11.138	BL	0.280123	8	1.04941
Trial 1	1.3	Rep	M	0:02:11.138-0:02:11.404	BL	0.244526	8	0.916051
Trial 1	1.3	Rep	M	0:02:11.404-0:02:11.670	BL	0.613217	8	2.29727
Trial 1	1.3	Rep	M	0:02:11.670-0:02:11.936	BL	0.199757	8	0.74834
Trial 1	1.3	Rep	M	0:02:11.936-0:02:12.202	BL	0.325108	8	1.21793
Trial 1	1.3	Rep	M	0:02:12.202-0:02:12.468	BL	0.152875	8	0.572705
Trial 1	1.3	Rep	M	0:02:12.468-0:02:12.734	BL	0.257015	8	0.962841
Trial 1	1.3	Rep	M	0:02:12.734-0:02:13.000	BL	0.172929	8	0.647833
Trial 1	1.3	Rep	M	0:02:13.000-0:02:13.266	BL	0.100025	7	0.428251
Trial 1	1.3	Rep	M	0:02:13.266-0:02:13.532	BL	0.186715	8	0.699482
Trial 1	1.3	Rep	M	0:02:13.532-0:02:13.798	BL	0.100343	8	0.375908
Trial 1	1.3	Rep	M	0:02:13.798-0:02:14.064	BL	0.211257	8	0.791424
Trial 1	1.3	Rep	M	0:02:14.064-0:02:14.330	BL	0.100176	8	0.375285
Trial 1	1.3	Rep	M	0:02:14.330-0:02:14.596	BL	0.121311	8	0.454459
Trial 1	1.3	Rep	M	0:02:14.596-0:02:14.862	BL	0.199486	8	0.747327
Trial 1	1.3	Rep	M	0:02:14.862-0:02:15.128	BL	0.186706	8	0.699447
Trial 1	1.3	Rep	M	0:02:15.128-0:02:15.394	BL	0.159856	8	0.598861
Trial 1	1.3	Rep	M	0:02:15.394-0:02:15.660	BL	0.173111	8	0.64852
Trial 1	1.3	Rep	M	0:02:15.660-0:02:15.926	BL	0.27991	8	1.04861
Trial 1	1.3	Rep	M	0:02:15.926-0:02:16.192	BL	0.143554	8	0.537789
Trial 1	1.3	Rep	M	0:02:16.192-0:02:16.458	BL	0.122468	8	0.458793
Trial 1	1.3	Rep	M	0:02:16.458-0:02:16.724	BL	0.0728733	8	0.273002
Trial 1	1.3	Rep	M	0:02:16.724-0:02:16.990	BL	0.0706806	8	0.264789
Trial 1	1.3	Rep	M	0:02:16.990-0:02:17.256	BL	0.0858473	8	0.321604
Trial 1	1.3	Rep	M	0:02:17.256-0:02:17.522	BL	0.0277503	8	0.10396
Trial 1	1.3	Rep	M	0:02:17.522-0:02:17.788	BL	0.162614	8	0.609193
Trial 1	1.3	Rep	M	0:02:17.788-0:02:18.054	BL	0.048931	8	0.183308
Trial 1	1.3	Rep	M	0:02:18.054-0:02:18.320	BL	0.0605459	8	0.226821
Trial 1	1.3	Rep	M	0:02:18.320-0:02:18.586	BL	0.134805	8	0.505011
Trial 1	1.3	Rep	M	0:02:18.586-0:02:18.852	BL	0.0769353	8	0.288218
Trial 1	1.3	Rep	M	0:02:18.852-0:02:19.118	BL	0.167043	8	0.625783
Trial 1	1.3	Rep	M	0:02:19.118-0:02:19.384	BL	0.451318	8	1.69075
Trial 1	1.3	Rep	M	0:02:19.384-0:02:19.650	BL	0.279535	8	1.0472
Trial 1	1.3	Rep	M	0:02:19.650-0:02:19.916	BL	0.417601	8	1.56443
Trial 1	1.3	Rep	M	0:02:19.916-0:02:20.182	BL	0.366172	8	1.37178
Trial 1	1.3	Rep	M	0:02:20.182-0:02:20.448	BL	0.164857	8	0.617593
Trial 1	1.3	Rep	M	0:02:20.448-0:02:20.714	BL	0.0588662	8	0.220528
Trial 1	1.3	Rep	M	0:02:20.714-0:02:20.980	BL	0.114549	8	0.429131
Trial 1	1.3	Rep	M	0:02:20.980-0:02:21.246	BL	0.123086	8	0.461111
Trial 1	1.3	Rep	M	0:02:21.246-0:02:21.512	BL	0.117355	8	0.439642
Trial 1	1.3	Rep	M	0:02:21.512-0:02:21.778	BL	0.123817	8	0.463849
Trial 1	1.3	Rep	M	0:02:21.778-0:02:22.044	BL	0.0798215	8	0.299031
Trial 1	1.3	Rep	M	0:02:22.044-0:02:22.310	BL	0.107238	8	0.401741
Trial 1	1.3	Rep	M	0:02:22.310-0:02:22.576	BL	0.119824	8	0.448889
Trial 1	1.3	Rep	M	0:02:22.576-0:02:22.842	BL	0.0784945	7	0.336068
Trial 1	1.3	Rep	M	0:02:22.842-0:02:23.108	BL	0.0832734	8	0.311966
Trial 1	1.3	Rep	M	0:02:23.108-0:02:23.374	BL	0.061839	8	0.231663
Trial 1	1.3	Rep	M	0:02:23.374-0:02:23.640	BL	0.0947301	8	0.354884
Trial 1	1.3	Rep	M	0:02:23.640-0:02:23.906	BL	0.147019	8	0.550772
Trial 1	1.3	Rep	M	0:02:23.906-0:02:24.172	BL	0.181388	8	0.679521
Trial 1	1.3	Rep	M	0:02:24.172-0:02:24.438	BL	0.180806	8	0.677346
Trial 1	1.3	Rep	M	0:02:24.438-0:02:24.704	BL	0.165995	8	0.621857
Trial 1	1.3	Rep	M	0:02:24.704-0:02:24.970	BL	0.16721	8	0.626409
Trial 1	1.3	Rep	M	0:02:24.970-0:02:25.236	BL	0.0407352	8	0.152604
Trial 1	1.3	Rep	M	0:02:25.236-0:02:25.502	BL	0.114925	8	0.430537
Trial 1	1.3	Rep	M	0:02:25.502-0:02:25.768	BL	0.0503861	8	0.188761
Trial 1	1.3	Rep	M	0:02:25.768-0:02:26.034	BL	0.0694951	8	0.260346
Trial 1	1.3	Rep	M	0:02:26.034-0:02:26.300	BL	0.102838	8	0.385258
Trial 1	1.3	Rep	M	0:02:26.300-0:02:26.566	BL	0.129154	8	0.48384
Trial 1	1.3	Rep	M	0:02:26.566-0:02:26.832	BL	0.0684371	8	0.256381
Trial 1	1.3	Rep	M	0:02:26.832-0:02:27.098	BL	0.0808234	8	0.302786
Trial 1	1.3	Rep	M	0:02:27.098-0:02:27.364	BL	0.0845248	8	0.316649
Trial 1	1.3	Rep	M	0:02:27.364-0:02:27.630	BL	0.116364	8	0.43593
Trial 1	1.3	Rep	M	0:02:27.630-0:02:27.896	BL	0.0885643	8	0.331784
Trial 1	1.3	Rep	M	0:02:27.896-0:02:28.162	BL	0.0935705	8	0.350539
Trial 1	1.3	Rep	M	0:02:28.162-0:02:28.428	BL	0.0648218	8	0.242839
Trial 1	1.3	Rep	M	0:02:28.428-0:02:28.694	BL	0.0412373	8	0.154486
Trial 1	1.3	Rep	M	0:02:28.694-0:02:28.960	BL	0.0996552	8	0.373339
Trial 1	1.3	Rep	M	0:02:28.960-0:02:29.226	BL	0.0741975	8	0.277962
Trial 1	1.3	Rep	M	0:02:29.226-0:02:29.492	BL	0.0456712	8	0.171095
Trial 1	1.3	Rep	M	0:02:29.492-0:02:29.758	BL	0.110229	8	0.412945
Trial 1	1.3	Rep	M	0:02:29.758-0:02:30.024	BL	0.0900985	8	0.33753
Trial 1	1.3	Rep	M	0:02:30.024-0:02:30.290	BL	0.10845	8	0.406282
Trial 1	1.3	Rep	M	0:02:30.290-0:02:30.556	BL	0.0631133	8	0.236438
Trial 1	1.3	Rep	M	0:02:30.556-0:02:30.822	BL	0.101244	8	0.379285
Trial 1	1.3	Rep	M	0:02:30.822-0:02:31.088	BL	0.0734608	8	0.275202
Trial 1	1.3	Rep	M	0:02:31.088-0:02:31.354	BL	0.0923701	8	0.346041
Trial 1	1.3	Rep	M	0:02:31.354-0:02:31.620	BL	0.108125	8	0.405065
Trial 1	1.3	Rep	M	0:02:31.620-0:02:31.886	BL	0.0605886	8	0.22698
Trial 1	1.3	Rep	M	0:02:31.886-0:02:32.152	BL	0.126046	7	0.539659
Trial 1	1.3	Rep	M	0:02:32.152-0:02:32.418	BL	0.101373	8	0.37977
Trial 1	1.3	Rep	M	0:02:32.418-0:02:32.684	BL	0.072011	8	0.269771
Trial 1	1.3	Rep	M	0:02:32.684-0:02:32.950	BL	0.102652	8	0.384562
Trial 1	1.3	Rep	M	0:02:32.950-0:02:33.216	BL	0.13374	8	0.501022
Trial 1	1.3	Rep	M	0:02:33.216-0:02:33.482	BL	0.11035	8	0.413397
Trial 1	1.3	Rep	M	0:02:33.482-0:02:33.748	BL	0.0772608	8	0.289439
Trial 1	1.3	Rep	M	0:02:33.748-0:02:34.014	BL	0.109307	8	0.40949
Trial 1	1.3	Rep	M	0:02:34.014-0:02:34.280	BL	0.100255	8	0.375581
Trial 1	1.3	Rep	M	0:02:34.280-0:02:34.546	BL	0.105632	8	0.395724
Trial 1	1.3	Rep	M	0:02:34.546-0:02:34.812	BL	0.0540397	8	0.202446
Trial 1	1.3	Rep	M	0:02:34.812-0:02:35.078	BL	0.0904382	8	0.338806
Trial 1	1.3	Rep	M	0:02:35.078-0:02:35.344	BL	0.114154	8	0.427646
Trial 1	1.3	Rep	M	0:02:35.344-0:02:35.610	BL	0.0806548	8	0.302153
Trial 1	1.3	Rep	M	0:02:35.610-0:02:35.876	BL	0.0809963	8	0.303433
Trial 1	1.3	Rep	M	0:02:35.876-0:02:36.142	BL	0.087436	8	0.327556
Trial 1	1.3	Rep	M	0:02:36.142-0:02:36.408	BL	0.116818	8	0.437628
Trial 1	1.3	Rep	M	0:02:36.408-0:02:36.674	BL	0.0657091	8	0.246163
Trial 1	1.3	Rep	M	0:02:36.674-0:02:36.940	BL	0.106432	8	0.39872
Trial 1	1.3	Rep	M	0:02:36.940-0:02:37.206	BL	0.0878142	8	0.328976
Trial 1	1.3	Rep	M	0:02:37.206-0:02:37.472	BL	0.183832	8	0.688681
Trial 1	1.3	Rep	M	0:02:37.472-0:02:37.738	BL	0.122764	8	0.459907
Trial 1	1.3	Rep	M	0:02:37.738-0:02:38.004	BL	0.392888	8	1.47186
Trial 1	1.3	Rep	M	0:02:38.004-0:02:38.270	BL	0.353667	8	1.32492
Trial 1	1.3	Rep	M	0:02:38.270-0:02:38.536	BL	1.48924	8	5.57905
Trial 1	1.3	Rep	M	0:02:38.536-0:02:38.802	BL	0.748781	8	2.80512
Trial 1	1.3	Rep	M	0:02:38.802-0:02:39.068	BL	2.04937	8	7.67745
Trial 1	1.3	Rep	M	0:02:39.068-0:02:39.334	BL	2.00118	8	7.49688
Trial 1	1.3	Rep	M	0:02:39.334-0:02:39.600	BL	1.25017	8	4.68343
Trial 1	1.3	Rep	M	0:02:39.600-0:02:39.866	BL	2.32947	8	8.72683
Trial 1	1.3	Rep	M	0:02:39.866-0:02:40.132	BL	2.01827	8	7.56093
Trial 1	1.3	Rep	M	0:02:40.132-0:02:40.398	BL	4.17538	8	15.642
Trial 1	1.3	Rep	M	0:02:40.398-0:02:40.664	BL	5.00982	8	18.768
Trial 1	1.3	Rep	M	0:02:40.664-0:02:40.930	BL	5.13056	8	19.2203
Trial 1	1.3	Rep	M	0:02:40.930-0:02:41.196	BL	5.10852	8	19.1378
Trial 1	1.3	Rep	M	0:02:41.196-0:02:41.462	BL	2.58663	8	9.69013
Trial 1	1.3	Rep	M	0:02:41.462-0:02:41.728	BL	0.385511	7	1.65052
Trial 1	1.3	Rep	M	0:02:41.728-0:02:41.994	BL	1.26615	8	4.74331
Trial 1	1.3	Rep	M	0:02:41.994-0:02:42.260	BL	0.670456	8	2.51169
Trial 1	1.3	Rep	M	0:02:42.260-0:02:42.526	BL	0.403388	8	1.51118
Trial 1	1.3	Rep	M	0:02:42.526-0:02:42.792	BL	0.321936	8	1.20605
Trial 1	1.3	Rep	M	0:02:42.792-0:02:43.058	BL	0.480497	8	1.80005
Trial 1	1.3	Rep	M	0:02:43.058-0:02:43.324	BL	0.453678	8	1.69958
Trial 1	1.3	Rep	M	0:02:43.324-0:02:43.590	BL	0.334434	8	1.25287
Trial 1	1.3	Rep	M	0:02:43.590-0:02:43.856	BL	0.771842	8	2.8915
Trial 1	1.3	Rep	M	0:02:43.856-0:02:44.122	BL	0.794278	8	2.97558
Trial 1	1.3	Rep	M	0:02:44.122-0:02:44.388	BL	1.84914	8	6.92732
Trial 1	1.3	Rep	M	0:02:44.388-0:02:44.654	BL	0.427859	8	1.60287
Trial 1	1.3	Rep	M	0:02:44.654-0:02:44.920	BL	0.372879	8	1.39689
Trial 1	1.3	Rep	M	0:02:44.920-0:02:45.186	BL	0.337497	8	1.26434
Trial 1	1.3	Rep	M	0:02:45.186-0:02:45.452	BL	0.805012	8	3.01579
Trial 1	1.3	Rep	M	0:02:45.452-0:02:45.718	BL	0.661998	8	2.48
Trial 1	1.3	Rep	M	0:02:45.718-0:02:45.984	BL	0.625782	8	2.34437
Trial 1	1.3	Rep	M	0:02:45.984-0:02:46.250	BL	0.740884	8	2.77553
Trial 1	1.3	Rep	M	0:02:46.250-0:02:46.516	BL	0.550285	8	2.06151
Trial 1	1.3	Rep	M	0:02:46.516-0:02:46.782	BL	0.393092	8	1.47262
Trial 1	1.3	Rep	M	0:02:46.782-0:02:47.048	BL	0.522891	8	1.95889
Trial 1	1.3	Rep	M	0:02:47.048-0:02:47.314	BL	0.576499	8	2.15972
Trial 1	1.3	Rep	M	0:02:47.314-0:02:47.580	BL	0.569718	8	2.1343
Trial 1	1.3	Rep	M	0:02:47.580-0:02:47.846	BL	0.380745	8	1.42637
Trial 1	1.3	Rep	M	0:02:47.846-0:02:48.112	BL	0.607628	8	2.27633
Trial 1	1.3	Rep	M	0:02:48.112-0:02:48.378	BL	0.690662	8	2.58739
Trial 1	1.3	Rep	M	0:02:48.378-0:02:48.644	BL	0.723732	8	2.71129
Trial 1	1.3	Rep	M	0:02:48.644-0:02:48.910	BL	1.06851	8	4.00287
Trial 1	1.3	Rep	M	0:02:48.910-0:02:49.176	BL	0.740431	8	2.77384
Trial 1	1.3	Rep	M	0:02:49.176-0:02:49.442	BL	0.282019	8	1.05652
Trial 1	1.3	Rep	M	0:02:49.442-0:02:49.708	BL	0.117702	8	0.440941
Trial 1	1.3	Rep	M	0:02:49.708-0:02:49.974	BL	0.308156	8	1.15444
Trial 1	1.3	Rep	M	0:02:49.974-0:02:50.240	BL	0.339639	8	1.27237
Trial 1	1.3	Rep	M	0:02:50.240-0:02:50.506	BL	0.218843	8	0.819836
Trial 1	1.3	Rep	M	0:02:50.506-0:02:50.772	BL	0.367264	8	1.37587
Trial 1	1.3	Rep	M	0:02:50.772-0:02:51.038	BL	0.157401	8	0.589659
Trial 1	1.3	Rep	M	0:02:51.038-0:02:51.304	BL	0.415675	7	1.77969
Trial 1	1.3	Rep	M	0:02:51.304-0:02:51.570	BL	0.36395	8	1.36345
Trial 1	1.3	Rep	M	0:02:51.570-0:02:51.836	BL	0.290636	8	1.08879
Trial 1	1.3	Rep	M	0:02:51.836-0:02:52.102	BL	0.426683	8	1.59847
Trial 1	1.3	Rep	M	0:02:52.102-0:02:52.368	BL	0.127267	8	0.476774
Trial 1	1.3	Rep	M	0:02:52.368-0:02:52.634	BL	0.413206	8	1.54797
Trial 1	1.3	Rep	M	0:02:52.634-0:02:52.900	BL	0.300638	8	1.12627
Trial 1	1.3	Rep	M	0:02:52.900-0:02:53.166	BL	0.180192	8	0.675043
Trial 1	1.3	Rep	M	0:02:53.166-0:02:53.432	BL	0.164296	8	0.615493
Trial 1	1.3	Rep	M	0:02:53.432-0:02:53.698	BL	0.290885	8	1.08973
Trial 1	1.3	Rep	M	0:02:53.698-0:02:53.964	BL	0.303564	8	1.13723
Trial 1	1.3	Rep	M	0:02:53.964-0:02:54.230	BL	1.48294	8	5.55544
Trial 1	1.3	Rep	M	0:02:54.230-0:02:54.496	BL	1.02517	8	3.84052
Trial 1	1.3	Rep	M	0:02:54.496-0:02:54.762	BL	0.413452	8	1.54889
Trial 1	1.3	Rep	M	0:02:54.762-0:02:55.028	BL	0.487518	8	1.82636
Trial 1	1.3	Rep	M	0:02:55.028-0:02:55.294	BL	0.0626127	8	0.234562
Trial 1	1.3	Rep	M	0:02:55.294-0:02:55.560	BL	0.0728681	8	0.272982
Trial 1	1.3	Rep	M	0:02:55.560-0:02:55.826	BL	0.0561996	8	0.210536
Trial 1	1.3	Rep	M	0:02:55.826-0:02:56.092	BL	0.576394	8	2.15933
Trial 1	1.3	Rep	M	0:02:56.092-0:02:56.358	BL	0.584245	8	2.18873
Trial 1	1.3	Rep	M	0:02:56.358-0:02:56.624	BL	0.282233	8	1.05732
Trial 1	1.3	Rep	M	0:02:56.624-0:02:56.890	BL	0.107159	8	0.401449
Trial 1	1.3	Rep	M	0:02:56.890-0:02:57.156	BL	0.259771	8	0.973169
Trial 1	1.3	Rep	M	0:02:57.156-0:02:57.422	BL	0.382173	8	1.43172
Trial 1	1.3	Rep	M	0:02:57.422-0:02:57.688	BL	0.317672	8	1.19008
Trial 1	1.3	Rep	M	0:02:57.688-0:02:57.954	BL	0.0567684	8	0.212667
Trial 1	1.3	Rep	M	0:02:57.954-0:02:58.220	BL	0.0864247	8	0.323767
Trial 1	1.3	Rep	M	0:02:58.220-0:02:58.486	BL	0.092778	8	0.34757
Trial 1	1.3	Rep	M	0:02:58.486-0:02:58.752	BL	0.138779	8	0.519903
Trial 1	1.3	Rep	M	0:02:58.752-0:02:59.018	BL	0.0947033	8	0.354783
Trial 1	1.3	Rep	M	0:02:59.018-0:02:59.284	BL	0.0437966	8	0.164073
Trial 1	1.3	Rep	M	0:02:59.284-0:02:59.550	BL	0.0281828	8	0.10558
Trial 1	1.3	Rep	M	0:02:59.550-0:02:59.816	BL	0.0877447	8	0.328712
Trial 1	1.3	Rep	M	0:02:59.816-0:03:00.082	BL	0.0742779	8	0.278265
Trial 1	1.3	Rep	M	0:03:00.082-0:03:00.348	CS1a	0.0613019	8	0.229652
Trial 1	1.3	Rep	M	0:03:00.348-0:03:00.614	CS1a	0.0514729	8	0.192831
Trial 1	1.3	Rep	M	0:03:00.614-0:03:00.880	CS1a	0.077021	7	0.329759
Trial 1	1.3	Rep	M	0:03:00.880-0:03:01.146	CS1a	0.196238	8	0.735157
Trial 1	1.3	Rep	M	0:03:01.146-0:03:01.412	CS1a	2.45277	8	9.18863
Trial 1	1.3	Rep	M	0:03:01.412-0:03:01.678	CS1a	10.3412	8	38.7409
Trial 1	1.3	Rep	M	0:03:01.678-0:03:01.944	CS1a	6.92362	8	25.9376
Trial 1	1.3	Rep	M	0:03:01.944-0:03:02.210	CS1a	4.2395	8	15.8822
Trial 1	1.3	Rep	M	0:03:02.210-0:03:02.476	CS1a	0.984442	8	3.68799
Trial 1	1.3	Rep	M	0:03:02.476-0:03:02.742	CS1a	0.81912	8	3.06862
Trial 1	1.3	Rep	M	0:03:02.742-0:03:03.008	CS1a	0.795097	8	2.97864
Trial 1	1.3	Rep	M	0:03:03.008-0:03:03.274	CS1a	0.288248	8	1.07984
Trial 1	1.3	Rep	M	0:03:03.274-0:03:03.540	CS1a	0.175165	8	0.656212
Trial 1	1.3	Rep	M	0:03:03.540-0:03:03.806	CS1a	0.199875	8	0.748784
Trial 1	1.3	Rep	M	0:03:03.806-0:03:04.072	CS1a	0.316934	8	1.18731
Trial 1	1.3	Rep	M	0:03:04.072-0:03:04.338	CS1a	0.306373	8	1.14776
Trial 1	1.3	Rep	M	0:03:04.338-0:03:04.604	CS1a	0.123193	8	0.461509
Trial 1	1.3	Rep	M	0:03:04.604-0:03:04.870	CS1a	0.0621045	8	0.232658
Trial 1	1.3	Rep	M	0:03:04.870-0:03:05.136	CS1a	0.0913894	8	0.342368
Trial 1	1.3	Rep	M	0:03:05.136-0:03:05.402	CS1a	0.0501629	8	0.187922
Trial 1	1.3	Rep	M	0:03:05.402-0:03:05.668	CS1a	0.182804	8	0.684832
Trial 1	1.3	Rep	M	0:03:05.668-0:03:05.934	CS1a	0.156518	8	0.58635
Trial 1	1.3	Rep	M	0:03:05.934-0:03:06.200	CS1a	0.0932857	8	0.349471
Trial 1	1.3	Rep	M	0:03:06.200-0:03:06.466	CS1a	0.0777052	8	0.291105
Trial 1	1.3	Rep	M	0:03:06.466-0:03:06.732	CS1a	0.121817	8	0.456358
Trial 1	1.3	Rep	M	0:03:06.732-0:03:06.998	CS1a	0.0711777	8	0.26665
Trial 1	1.3	Rep	M	0:03:06.998-0:03:07.264	CS1a	0.0944811	8	0.353948
Trial 1	1.3	Rep	M	0:03:07.264-0:03:07.530	CS1a	0.115978	8	0.434482
Trial 1	1.3	Rep	M	0:03:07.530-0:03:07.796	CS1a	0.0448197	8	0.167907
Trial 1	1.3	Rep	M	0:03:07.796-0:03:08.062	CS1a	0.12421	8	0.46532
Trial 1	1.3	Rep	M	0:03:08.062-0:03:08.328	CS1a	0.119174	8	0.44646
Trial 1	1.3	Rep	M	0:03:08.328-0:03:08.594	CS1a	0.08102	8	0.303521
Trial 1	1.3	Rep	M	0:03:08.594-0:03:08.860	CS1a	0.104891	8	0.392946
Trial 1	1.3	Rep	M	0:03:08.860-0:03:09.126	CS1a	0.0775185	8	0.290403
Trial 1	1.3	Rep	M	0:03:09.126-0:03:09.392	CS1a	0.140645	8	0.526889
Trial 1	1.3	Rep	M	0:03:09.392-0:03:09.658	CS1a	0.109877	8	0.411625
Trial 1	1.3	Rep	M	0:03:09.658-0:03:09.924	CS1a	0.182843	8	0.684977
Trial 1	1.3	Rep	M	0:03:09.924-0:03:10.190	CS1a	0.0588475	7	0.251951
Trial 1	1.3	Rep	M	0:03:10.190-0:03:10.456	CS1b	6.90473	8	25.8669
Trial 1	1.3	Rep	M	0:03:10.456-0:03:10.722	CS1b	9.82508	8	36.8072
Trial 1	1.3	Rep	M	0:03:10.722-0:03:10.988	CS1b	4.21128	8	15.7765
Trial 1	1.3	Rep	M	0:03:10.988-0:03:11.254	CS1b	1.52672	8	5.7195
Trial 1	1.3	Rep	M	0:03:11.254-0:03:11.520	CS1b	0.666954	8	2.49857
Trial 1	1.3	Rep	M	0:03:11.520-0:03:11.786	CS1b	0.226522	8	0.848613
Trial 1	1.3	Rep	M	0:03:11.786-0:03:12.052	CS1b	0.350908	8	1.31458
Trial 1	1.3	Rep	M	0:03:12.052-0:03:12.318	CS1b	0.357288	8	1.33849
Trial 1	1.3	Rep	M	0:03:12.318-0:03:12.584	CS1b	0.201333	8	0.754249
Trial 1	1.3	Rep	M	0:03:12.584-0:03:12.850	CS1b	0.282431	8	1.05805
Trial 1	1.3	Rep	M	0:03:12.850-0:03:13.116	CS1b	0.639875	8	2.39713
Trial 1	1.3	Rep	M	0:03:13.116-0:03:13.382	CS1b	0.392279	8	1.46957
Trial 1	1.3	Rep	M	0:03:13.382-0:03:13.648	CS1b	0.151191	8	0.566398
Trial 1	1.3	Rep	M	0:03:13.648-0:03:13.914	CS1b	0.100234	8	0.375504
Trial 1	1.3	Rep	M	0:03:13.914-0:03:14.180	CS1b	0.143697	8	0.538327
Trial 1	1.3	Rep	M	0:03:14.180-0:03:14.446	CS1b	0.175809	8	0.658625
Trial 1	1.3	Rep	M	0:03:14.446-0:03:14.712	CS1b	0.153762	8	0.576032
Trial 1	1.3	Rep	M	0:03:14.712-0:03:14.978	CS1b	0.159799	8	0.598649
Trial 1	1.3	Rep	M	0:03:14.978-0:03:15.244	CS1b	0.118972	8	0.445701
Trial 1	1.3	Rep	M	0:03:15.244-0:03:15.510	CS1b	0.115801	8	0.433817
Trial 1	1.3	Rep	M	0:03:15.510-0:03:15.776	CS1b	0.637178	8	2.38703
Trial 1	1.3	Rep	M	0:03:15.776-0:03:16.042	CS1b	0.253226	8	0.948652
Trial 1	1.3	Rep	M	0:03:16.042-0:03:16.308	CS1b	0.251651	8	0.942747
Trial 1	1.3	Rep	M	0:03:16.308-0:03:16.574	CS1b	0.132208	8	0.495288
Trial 1	1.3	Rep	M	0:03:16.574-0:03:16.840	CS1b	0.120604	8	0.451815
Trial 1	1.3	Rep	M	0:03:16.840-0:03:17.106	CS1b	0.0936492	8	0.350836
Trial 1	1.3	Rep	M	0:03:17.106-0:03:17.372	CS1b	0.122209	8	0.457824
Trial 1	1.3	Rep	M	0:03:17.372-0:03:17.638	CS1b	0.07044	8	0.263886
Trial 1	1.3	Rep	M	0:03:17.638-0:03:17.904	CS1b	0.233661	8	0.875358
Trial 1	1.3	Rep	M	0:03:17.904-0:03:18.170	CS1b	0.105207	8	0.394131
Trial 1	1.3	Rep	M	0:03:18.170-0:03:18.436	CS1b	0.107149	8	0.401409
Trial 1	1.3	Rep	M	0:03:18.436-0:03:18.702	CS1b	0.0791803	8	0.296629
Trial 1	1.3	Rep	M	0:03:18.702-0:03:18.968	CS1b	0.0990082	8	0.370908
Trial 1	1.3	Rep	M	0:03:18.968-0:03:19.234	CS1b	0.104948	8	0.393161
Trial 1	1.3	Rep	M	0:03:19.234-0:03:19.500	CS1b	0.114272	8	0.428087
Trial 1	1.3	Rep	M	0:03:19.500-0:03:19.766	CS1b	0.108901	7	0.466252
Trial 1	1.3	Rep	M	0:03:19.766-0:03:20.032	CS1b	0.0913346	8	0.342164
Trial 1	1.3	Rep	M	0:03:20.032-0:03:20.298	IT1	9.17856	8	34.385
Trial 1	1.3	Rep	M	0:03:20.298-0:03:20.564	IT1	25.0872	8	93.9836
Trial 1	1.3	Rep	M	0:03:20.564-0:03:20.830	IT1	1.40123	8	5.24938
Trial 1	1.3	Rep	M	0:03:20.830-0:03:21.096	IT1	4.69445	8	17.5865
Trial 1	1.3	Rep	M	0:03:21.096-0:03:21.362	IT1	2.00705	8	7.51895
Trial 1	1.3	Rep	M	0:03:21.362-0:03:21.628	IT1	4.40244	8	16.4926
Trial 1	1.3	Rep	M	0:03:21.628-0:03:21.894	IT1	1.58672	8	5.94425
Trial 1	1.3	Rep	M	0:03:21.894-0:03:22.160	IT1	0.182592	8	0.684034
Trial 1	1.3	Rep	M	0:03:22.160-0:03:22.426	IT1	0.155347	8	0.581968
Trial 1	1.3	Rep	M	0:03:22.426-0:03:22.692	IT1	0.245033	8	0.917958
Trial 1	1.3	Rep	M	0:03:22.692-0:03:22.958	IT1	0.21775	8	0.815743
Trial 1	1.3	Rep	M	0:03:22.958-0:03:23.224	IT1	0.427312	8	1.60081
Trial 1	1.3	Rep	M	0:03:23.224-0:03:23.490	IT1	0.818081	8	3.06474
Trial 1	1.3	Rep	M	0:03:23.490-0:03:23.756	IT1	0.448795	8	1.6813
Trial 1	1.3	Rep	M	0:03:23.756-0:03:24.022	IT1	0.572206	8	2.14362
Trial 1	1.3	Rep	M	0:03:24.022-0:03:24.288	IT1	0.638271	8	2.39111
Trial 1	1.3	Rep	M	0:03:24.288-0:03:24.554	IT1	0.354918	8	1.32961
Trial 1	1.3	Rep	M	0:03:24.554-0:03:24.820	IT1	1.03474	8	3.87639
Trial 1	1.3	Rep	M	0:03:24.820-0:03:25.086	IT1	2.15596	8	8.07674
Trial 1	1.3	Rep	M	0:03:25.086-0:03:25.352	IT1	0.273933	8	1.02622
Trial 1	1.3	Rep	M	0:03:25.352-0:03:25.618	IT1	0.171111	8	0.641024
Trial 1	1.3	Rep	M	0:03:25.618-0:03:25.884	IT1	0.307601	8	1.15234
Trial 1	1.3	Rep	M	0:03:25.884-0:03:26.150	IT1	0.418604	8	1.5682
Trial 1	1.3	Rep	M	0:03:26.150-0:03:26.416	IT1	0.296425	8	1.11047
Trial 1	1.3	Rep	M	0:03:26.416-0:03:26.682	IT1	0.543292	8	2.03531
Trial 1	1.3	Rep	M	0:03:26.682-0:03:26.948	IT1	0.509965	8	1.91047
Trial 1	1.3	Rep	M	0:03:26.948-0:03:27.214	IT1	0.660719	8	2.47521
Trial 1	1.3	Rep	M	0:03:27.214-0:03:27.480	IT1	0.443189	8	1.6603
Trial 1	1.3	Rep	M	0:03:27.480-0:03:27.746	IT1	0.431863	8	1.61787
Trial 1	1.3	Rep	M	0:03:27.746-0:03:28.012	IT1	1.78513	8	6.68753
Trial 1	1.3	Rep	M	0:03:28.012-0:03:28.278	IT1	0.890307	8	3.3353
Trial 1	1.3	Rep	M	0:03:28.278-0:03:28.544	IT1	0.465051	8	1.74219
Trial 1	1.3	Rep	M	0:03:28.544-0:03:28.810	IT1	1.73546	8	6.5015
Trial 1	1.3	Rep	M	0:03:28.810-0:03:29.076	IT1	1.75361	8	6.56943
Trial 1	1.3	Rep	M	0:03:29.076-0:03:29.342	IT1	0.927597	7	3.97143
Trial 1	1.3	Rep	M	0:03:29.342-0:03:29.608	IT1	0.792972	8	2.97069
Trial 1	1.3	Rep	M	0:03:29.608-0:03:29.874	IT1	0.282359	8	1.05779
Trial 1	1.3	Rep	M	0:03:29.874-0:03:30.140	IT1	0.365757	8	1.37022
Trial 1	1.3	Rep	M	0:03:30.140-0:03:30.406	IT1	0.213273	8	0.798973
Trial 1	1.3	Rep	M	0:03:30.406-0:03:30.672	IT1	0.64035	8	2.3989
Trial 1	1.3	Rep	M	0:03:30.672-0:03:30.938	IT1	1.30047	8	4.87191
Trial 1	1.3	Rep	M	0:03:30.938-0:03:31.204	IT1	0.94064	8	3.52387
Trial 1	1.3	Rep	M	0:03:31.204-0:03:31.470	IT1	1.81555	8	6.8015
Trial 1	1.3	Rep	M	0:03:31.470-0:03:31.736	IT1	3.6716	8	13.7547
Trial 1	1.3	Rep	M	0:03:31.736-0:03:32.002	IT1	1.27547	8	4.77823
Trial 1	1.3	Rep	M	0:03:32.002-0:03:32.268	IT1	0.589754	8	2.20937
Trial 1	1.3	Rep	M	0:03:32.268-0:03:32.534	IT1	0.16418	8	0.615056
Trial 1	1.3	Rep	M	0:03:32.534-0:03:32.800	IT1	0.268442	8	1.00565
Trial 1	1.3	Rep	M	0:03:32.800-0:03:33.066	IT1	0.257365	8	0.96415
Trial 1	1.3	Rep	M	0:03:33.066-0:03:33.332	IT1	0.215687	8	0.808016
Trial 1	1.3	Rep	M	0:03:33.332-0:03:33.598	IT1	0.532407	8	1.99453
Trial 1	1.3	Rep	M	0:03:33.598-0:03:33.864	IT1	0.944754	8	3.53928
Trial 1	1.3	Rep	M	0:03:33.864-0:03:34.130	IT1	0.955461	8	3.57941
Trial 1	1.3	Rep	M	0:03:34.130-0:03:34.396	IT1	0.822755	8	3.08224
Trial 1	1.3	Rep	M	0:03:34.396-0:03:34.662	IT1	1.39448	8	5.22408
Trial 1	1.3	Rep	M	0:03:34.662-0:03:34.928	IT1	2.26202	8	8.4741
Trial 1	1.3	Rep	M	0:03:34.928-0:03:35.194	IT1	1.35167	8	5.06369
Trial 1	1.3	Rep	M	0:03:35.194-0:03:35.460	IT1	0.180666	8	0.676823
Trial 1	1.3	Rep	M	0:03:35.460-0:03:35.726	IT1	1.5052	8	5.63885
Trial 1	1.3	Rep	M	0:03:35.726-0:03:35.992	IT1	2.92004	8	10.9392
Trial 1	1.3	Rep	M	0:03:35.992-0:03:36.258	IT1	2.99883	8	11.2344
Trial 1	1.3	Rep	M	0:03:36.258-0:03:36.524	IT1	1.36978	8	5.1315
Trial 1	1.3	Rep	M	0:03:36.524-0:03:36.790	IT1	0.335824	8	1.25809
Trial 1	1.3	Rep	M	0:03:36.790-0:03:37.056	IT1	0.641228	8	2.40219
Trial 1	1.3	Rep	M	0:03:37.056-0:03:37.322	IT1	0.538146	8	2.01602
Trial 1	1.3	Rep	M	0:03:37.322-0:03:37.588	IT1	0.991038	8	3.71266
Trial 1	1.3	Rep	M	0:03:37.588-0:03:37.854	IT1	0.604924	8	2.26619
Trial 1	1.3	Rep	M	0:03:37.854-0:03:38.120	IT1	0.372345	8	1.39489
Trial 1	1.3	Rep	M	0:03:38.120-0:03:38.386	IT1	0.806876	8	3.02277
Trial 1	1.3	Rep	M	0:03:38.386-0:03:38.652	IT1	0.775303	8	2.90448
Trial 1	1.3	Rep	M	0:03:38.652-0:03:38.918	IT1	0.713472	7	3.05467
Trial 1	1.3	Rep	M	0:03:38.918-0:03:39.184	IT1	1.05833	8	3.96478
Trial 1	1.3	Rep	M	0:03:39.184-0:03:39.450	IT1	1.55619	8	5.82987
Trial 1	1.3	Rep	M	0:03:39.450-0:03:39.716	IT1	0.952919	8	3.56987
Trial 1	1.3	Rep	M	0:03:39.716-0:03:39.982	IT1	0.621792	8	2.32938
Trial 1	1.3	Rep	M	0:03:39.982-0:03:40.248	IT1	0.920809	8	3.44956
Trial 1	1.3	Rep	M	0:03:40.248-0:03:40.514	IT1	1.79183	8	6.71263
Trial 1	1.3	Rep	M	0:03:40.514-0:03:40.780	IT1	1.01885	8	3.81689
Trial 1	1.3	Rep	M	0:03:40.780-0:03:41.046	IT1	0.732141	8	2.74279
Trial 1	1.3	Rep	M	0:03:41.046-0:03:41.312	IT1	2.32306	8	8.70274
Trial 1	1.3	Rep	M	0:03:41.312-0:03:41.578	IT1	3.37586	8	12.6468
Trial 1	1.3	Rep	M	0:03:41.578-0:03:41.844	IT1	3.81563	8	14.2943
Trial 1	1.3	Rep	M	0:03:41.844-0:03:42.110	IT1	2.27926	8	8.53867
Trial 1	1.3	Rep	M	0:03:42.110-0:03:42.376	IT1	0.357493	8	1.33927
Trial 1	1.3	Rep	M	0:03:42.376-0:03:42.642	IT1	0.968481	8	3.62817
Trial 1	1.3	Rep	M	0:03:42.642-0:03:42.908	IT1	1.83615	8	6.87865
Trial 1	1.3	Rep	M	0:03:42.908-0:03:43.174	IT1	2.55593	8	9.57521
Trial 1	1.3	Rep	M	0:03:43.174-0:03:43.440	IT1	1.83123	8	6.86024
Trial 1	1.3	Rep	M	0:03:43.440-0:03:43.706	IT1	0.9316	8	3.49002
Trial 1	1.3	Rep	M	0:03:43.706-0:03:43.972	IT1	2.56263	8	9.60024
Trial 1	1.3	Rep	M	0:03:43.972-0:03:44.238	IT1	2.0067	8	7.5176
Trial 1	1.3	Rep	M	0:03:44.238-0:03:44.504	IT1	0.42027	8	1.57444
Trial 1	1.3	Rep	M	0:03:44.504-0:03:44.770	IT1	0.415653	8	1.55714
Trial 1	1.3	Rep	M	0:03:44.770-0:03:45.036	IT1	1.67973	8	6.29274
Trial 1	1.3	Rep	M	0:03:45.036-0:03:45.302	IT1	3.66417	8	13.7269
Trial 1	1.3	Rep	M	0:03:45.302-0:03:45.568	IT1	1.19363	8	4.47163
Trial 1	1.3	Rep	M	0:03:45.568-0:03:45.834	IT1	0.983479	8	3.68438
Trial 1	1.3	Rep	M	0:03:45.834-0:03:46.100	IT1	1.1502	8	4.30892
Trial 1	1.3	Rep	M	0:03:46.100-0:03:46.366	IT1	0.411335	8	1.54096
Trial 1	1.3	Rep	M	0:03:46.366-0:03:46.632	IT1	3.11802	8	11.6808
Trial 1	1.3	Rep	M	0:03:46.632-0:03:46.898	IT1	3.73693	8	13.9994
Trial 1	1.3	Rep	M	0:03:46.898-0:03:47.164	IT1	3.48892	8	13.0704
Trial 1	1.3	Rep	M	0:03:47.164-0:03:47.430	IT1	3.41278	8	12.7851
Trial 1	1.3	Rep	M	0:03:47.430-0:03:47.696	IT1	1.89237	8	7.0893
Trial 1	1.3	Rep	M	0:03:47.696-0:03:47.962	IT1	0.629752	8	2.3592
Trial 1	1.3	Rep	M	0:03:47.962-0:03:48.228	IT1	0.668209	7	2.86088
Trial 1	1.3	Rep	M	0:03:48.228-0:03:48.494	IT1	1.46571	8	5.49092
Trial 1	1.3	Rep	M	0:03:48.494-0:03:48.760	IT1	2.71531	8	10.1722
Trial 1	1.3	Rep	M	0:03:48.760-0:03:49.026	IT1	3.39992	8	12.7369
Trial 1	1.3	Rep	M	0:03:49.026-0:03:49.292	IT1	2.60394	8	9.75505
Trial 1	1.3	Rep	M	0:03:49.292-0:03:49.558	IT1	0.442417	8	1.6574
Trial 1	1.3	Rep	M	0:03:49.558-0:03:49.824	IT1	0.189316	8	0.70923
Trial 1	1.3	Rep	M	0:03:49.824-0:03:50.090	IT1	0.206692	8	0.774318
Trial 1	1.3	Rep	M	0:03:50.090-0:03:50.356	IT1	0.845538	8	3.16758
Trial 1	1.3	Rep	M	0:03:50.356-0:03:50.622	IT1	3.20015	8	11.9886
Trial 1	1.3	Rep	M	0:03:50.622-0:03:50.888	IT1	1.24031	8	4.64649
Trial 1	1.3	Rep	M	0:03:50.888-0:03:51.154	IT1	0.235484	8	0.882185
Trial 1	1.3	Rep	M	0:03:51.154-0:03:51.420	IT1	0.191367	8	0.716906
Trial 1	1.3	Rep	M	0:03:51.420-0:03:51.686	IT1	0.291993	8	1.09388
Trial 1	1.3	Rep	M	0:03:51.686-0:03:51.952	IT1	0.22153	8	0.829911
Trial 1	1.3	Rep	M	0:03:51.952-0:03:52.218	IT1	0.178463	8	0.668567
Trial 1	1.3	Rep	M	0:03:52.218-0:03:52.484	IT1	0.204352	8	0.765551
Trial 1	1.3	Rep	M	0:03:52.484-0:03:52.750	IT1	0.335972	8	1.25864
Trial 1	1.3	Rep	M	0:03:52.750-0:03:53.016	IT1	0.640848	8	2.40077
Trial 1	1.3	Rep	M	0:03:53.016-0:03:53.282	IT1	0.598776	8	2.24316
Trial 1	1.3	Rep	M	0:03:53.282-0:03:53.548	IT1	0.632716	8	2.37031
Trial 1	1.3	Rep	M	0:03:53.548-0:03:53.814	IT1	0.159723	8	0.598365
Trial 1	1.3	Rep	M	0:03:53.814-0:03:54.080	IT1	0.127282	8	0.476828
Trial 1	1.3	Rep	M	0:03:54.080-0:03:54.346	IT1	0.31753	8	1.18955
Trial 1	1.3	Rep	M	0:03:54.346-0:03:54.612	IT1	0.160458	8	0.601118
Trial 1	1.3	Rep	M	0:03:54.612-0:03:54.878	IT1	0.255498	8	0.957156
Trial 1	1.3	Rep	M	0:03:54.878-0:03:55.144	IT1	0.0834437	8	0.312602
Trial 1	1.3	Rep	M	0:03:55.144-0:03:55.410	IT1	0.0871914	8	0.326639
Trial 1	1.3	Rep	M	0:03:55.410-0:03:55.676	IT1	0.0794012	8	0.297456
Trial 1	1.3	Rep	M	0:03:55.676-0:03:55.942	IT1	0.0859724	8	0.322075
Trial 1	1.3	Rep	M	0:03:55.942-0:03:56.208	IT1	0.194229	8	0.727632
Trial 1	1.3	Rep	M	0:03:56.208-0:03:56.474	IT1	0.126676	8	0.474562
Trial 1	1.3	Rep	M	0:03:56.474-0:03:56.740	IT1	0.113327	8	0.424552
Trial 1	1.3	Rep	M	0:03:56.740-0:03:57.006	IT1	0.186099	8	0.697172
Trial 1	1.3	Rep	M	0:03:57.006-0:03:57.272	IT1	0.176297	8	0.660454
Trial 1	1.3	Rep	M	0:03:57.272-0:03:57.538	IT1	0.146328	8	0.548179
Trial 1	1.3	Rep	M	0:03:57.538-0:03:57.804	IT1	0.215996	7	0.924781
Trial 1	1.3	Rep	M	0:03:57.804-0:03:58.070	IT1	0.274555	8	1.02855
Trial 1	1.3	Rep	M	0:03:58.070-0:03:58.336	IT1	0.111469	8	0.417591
Trial 1	1.3	Rep	M	0:03:58.336-0:03:58.602	IT1	0.13786	8	0.516461
Trial 1	1.3	Rep	M	0:03:58.602-0:03:58.868	IT1	0.100865	8	0.377867
Trial 1	1.3	Rep	M	0:03:58.868-0:03:59.134	IT1	0.0958418	8	0.359049
Trial 1	1.3	Rep	M	0:03:59.134-0:03:59.400	IT1	0.0439847	8	0.164778
Trial 1	1.3	Rep	M	0:03:59.400-0:03:59.666	IT1	0.0789894	8	0.295912
Trial 1	1.3	Rep	M	0:03:59.666-0:03:59.932	IT1	0.0964741	8	0.361414
Trial 1	1.3	Rep	M	0:03:59.932-0:04:00.198	IT1	0.116043	8	0.434725
Trial 1	1.3	Rep	M	0:04:00.198-0:04:00.464	IT1	0.229419	8	0.859455
Trial 1	1.3	Rep	M	0:04:00.464-0:04:00.730	IT1	0.199756	8	0.748335
Trial 1	1.3	Rep	M	0:04:00.730-0:04:00.996	IT1	0.434999	8	1.62962
Trial 1	1.3	Rep	M	0:04:00.996-0:04:01.262	IT1	0.826917	8	3.09783
Trial 1	1.3	Rep	M	0:04:01.262-0:04:01.528	IT1	1.36237	8	5.10378
Trial 1	1.3	Rep	M	0:04:01.528-0:04:01.794	IT1	0.759568	8	2.84551
Trial 1	1.3	Rep	M	0:04:01.794-0:04:02.060	IT1	2.32787	8	8.7208
Trial 1	1.3	Rep	M	0:04:02.060-0:04:02.326	IT1	0.946882	8	3.54724
Trial 1	1.3	Rep	M	0:04:02.326-0:04:02.592	IT1	0.0859955	8	0.32216
Trial 1	1.3	Rep	M	0:04:02.592-0:04:02.858	IT1	0.258536	8	0.96854
Trial 1	1.3	Rep	M	0:04:02.858-0:04:03.124	IT1	0.0832452	8	0.311858
Trial 1	1.3	Rep	M	0:04:03.124-0:04:03.390	IT1	0.102762	8	0.384974
Trial 1	1.3	Rep	M	0:04:03.390-0:04:03.656	IT1	0.0407543	8	0.152676
Trial 1	1.3	Rep	M	0:04:03.656-0:04:03.922	IT1	0.0350405	8	0.13127
Trial 1	1.3	Rep	M	0:04:03.922-0:04:04.188	IT1	0.047497	8	0.177936
Trial 1	1.3	Rep	M	0:04:04.188-0:04:04.454	IT1	0.0202232	8	0.0757608
Trial 1	1.3	Rep	M	0:04:04.454-0:04:04.720	IT1	0.10163	8	0.380731
Trial 1	1.3	Rep	M	0:04:04.720-0:04:04.986	IT1	0.0770262	8	0.28856
Trial 1	1.3	Rep	M	0:04:04.986-0:04:05.252	IT1	0.110869	8	0.415349
Trial 1	1.3	Rep	M	0:04:05.252-0:04:05.518	IT1	0.0526307	8	0.197169
Trial 1	1.3	Rep	M	0:04:05.518-0:04:05.784	IT1	0.0866466	8	0.324598
Trial 1	1.3	Rep	M	0:04:05.784-0:04:06.050	IT1	0.0407237	8	0.152562
Trial 1	1.3	Rep	M	0:04:06.050-0:04:06.316	IT1	0.149769	8	0.561072
Trial 1	1.3	Rep	M	0:04:06.316-0:04:06.582	IT1	0.243357	8	0.911676
Trial 1	1.3	Rep	M	0:04:06.582-0:04:06.848	IT1	0.199319	8	0.7467
Trial 1	1.3	Rep	M	0:04:06.848-0:04:07.114	IT1	0.111003	8	0.415843
Trial 1	1.3	Rep	M	0:04:07.114-0:04:07.380	IT1	0.0452204	7	0.193607
Trial 1	1.3	Rep	M	0:04:07.380-0:04:07.646	IT1	0.0803513	8	0.301018
Trial 1	1.3	Rep	M	0:04:07.646-0:04:07.912	IT1	0.149973	8	0.561834
Trial 1	1.3	Rep	M	0:04:07.912-0:04:08.178	IT1	0.124361	8	0.465887
Trial 1	1.3	Rep	M	0:04:08.178-0:04:08.444	IT1	0.157012	8	0.588205
Trial 1	1.3	Rep	M	0:04:08.444-0:04:08.710	IT1	0.133265	8	0.499241
Trial 1	1.3	Rep	M	0:04:08.710-0:04:08.976	IT1	0.141159	8	0.528823
Trial 1	1.3	Rep	M	0:04:08.976-0:04:09.242	IT1	0.038912	8	0.145773
Trial 1	1.3	Rep	M	0:04:09.242-0:04:09.508	IT1	0.0931572	8	0.348993
Trial 1	1.3	Rep	M	0:04:09.508-0:04:09.774	IT1	0.0300585	8	0.112606
Trial 1	1.3	Rep	M	0:04:09.774-0:04:10.040	IT1	0.147346	8	0.551993
Trial 1	1.3	Rep	M	0:04:10.040-0:04:10.306	IT1	0.188102	8	0.704676
Trial 1	1.3	Rep	M	0:04:10.306-0:04:10.572	IT1	0.149172	8	0.558835
Trial 1	1.3	Rep	M	0:04:10.572-0:04:10.838	IT1	0.141062	8	0.528456
Trial 1	1.3	Rep	M	0:04:10.838-0:04:11.104	IT1	0.109806	8	0.41136
Trial 1	1.3	Rep	M	0:04:11.104-0:04:11.370	IT1	0.11516	8	0.431418
Trial 1	1.3	Rep	M	0:04:11.370-0:04:11.636	IT1	0.0524703	8	0.196567
Trial 1	1.3	Rep	M	0:04:11.636-0:04:11.902	IT1	0.0943785	8	0.353565
Trial 1	1.3	Rep	M	0:04:11.902-0:04:12.168	IT1	0.0909822	8	0.340845
Trial 1	1.3	Rep	M	0:04:12.168-0:04:12.434	IT1	0.0560935	8	0.210139
Trial 1	1.3	Rep	M	0:04:12.434-0:04:12.700	IT1	0.0225108	8	0.0843306
Trial 1	1.3	Rep	M	0:04:12.700-0:04:12.966	IT1	0.062972	8	0.235909
Trial 1	1.3	Rep	M	0:04:12.966-0:04:13.232	IT1	0.153305	8	0.574316
Trial 1	1.3	Rep	M	0:04:13.232-0:04:13.498	IT1	0.136006	8	0.509511
Trial 1	1.3	Rep	M	0:04:13.498-0:04:13.764	IT1	0.128038	8	0.47966
Trial 1	1.3	Rep	M	0:04:13.764-0:04:14.030	IT1	0.0939772	8	0.352063
Trial 1	1.3	Rep	M	0:04:14.030-0:04:14.296	IT1	0.12163	8	0.455659
Trial 1	1.3	Rep	M	0:04:14.296-0:04:14.562	IT1	0.0591572	8	0.221616
Trial 1	1.3	Rep	M	0:04:14.562-0:04:14.828	IT1	0.0933975	8	0.34989
Trial 1	1.3	Rep	M	0:04:14.828-0:04:15.094	IT1	0.0436768	8	0.163624
Trial 1	1.3	Rep	M	0:04:15.094-0:04:15.360	IT1	0.111362	8	0.417188
Trial 1	1.3	Rep	M	0:04:15.360-0:04:15.626	IT1	0.0669892	8	0.250959
Trial 1	1.3	Rep	M	0:04:15.626-0:04:15.892	IT1	0.117733	8	0.441057
Trial 1	1.3	Rep	M	0:04:15.892-0:04:16.158	IT1	0.0705634	8	0.264349
Trial 1	1.3	Rep	M	0:04:16.158-0:04:16.424	IT1	0.0884581	8	0.331388
Trial 1	1.3	Rep	M	0:04:16.424-0:04:16.690	IT1	0.0515575	7	0.220738
Trial 1	1.3	Rep	M	0:04:16.690-0:04:16.956	IT1	0.0361079	8	0.135269
Trial 1	1.3	Rep	M	0:04:16.956-0:04:17.222	IT1	0.0985623	8	0.369243
Trial 1	1.3	Rep	M	0:04:17.222-0:04:17.488	IT1	0.124977	8	0.468196
Trial 1	1.3	Rep	M	0:04:17.488-0:04:17.754	IT1	0.123537	8	0.462799
Trial 1	1.3	Rep	M	0:04:17.754-0:04:18.020	IT1	0.213507	8	0.799849
Trial 1	1.3	Rep	M	0:04:18.020-0:04:18.286	IT1	0.189846	8	0.71121
Trial 1	1.3	Rep	M	0:04:18.286-0:04:18.552	IT1	0.133902	8	0.501631
Trial 1	1.3	Rep	M	0:04:18.552-0:04:18.818	IT1	0.0708502	8	0.265422
Trial 1	1.3	Rep	M	0:04:18.818-0:04:19.084	IT1	0.16166	8	0.605618
Trial 1	1.3	Rep	M	0:04:19.084-0:04:19.350	IT1	0.0873589	8	0.327268
Trial 1	1.3	Rep	M	0:04:19.350-0:04:19.616	IT1	0.141896	8	0.531577
Trial 1	1.3	Rep	M	0:04:19.616-0:04:19.882	IT1	0.0830956	8	0.311299
Trial 1	1.3	Rep	M	0:04:19.882-0:04:20.148	IT1	0.263608	8	0.987539
Trial 1	1.3	Rep	M	0:04:20.148-0:04:20.414	IT1	0.115902	8	0.434199
Trial 1	1.3	Rep	M	0:04:20.414-0:04:20.680	IT1	0.0869034	8	0.32556
Trial 1	1.3	Rep	M	0:04:20.680-0:04:20.946	IT1	0.0835251	8	0.312906
Trial 1	1.3	Rep	M	0:04:20.946-0:04:21.212	IT1	0.0598739	8	0.224303
Trial 1	1.3	Rep	M	0:04:21.212-0:04:21.478	IT1	0.0876436	8	0.328333
Trial 1	1.3	Rep	M	0:04:21.478-0:04:21.744	IT1	0.0696466	8	0.260915
Trial 1	1.3	Rep	M	0:04:21.744-0:04:22.010	IT1	0.0875883	8	0.328127
Trial 1	1.3	Rep	M	0:04:22.010-0:04:22.276	IT1	0.0537437	8	0.201336
Trial 1	1.3	Rep	M	0:04:22.276-0:04:22.542	IT1	0.092394	8	0.346129
Trial 1	1.3	Rep	M	0:04:22.542-0:04:22.808	IT1	0.0499257	8	0.187035
Trial 1	1.3	Rep	M	0:04:22.808-0:04:23.074	IT1	0.043692	8	0.163682
Trial 1	1.3	Rep	M	0:04:23.074-0:04:23.340	IT1	0.119028	8	0.445908
Trial 1	1.3	Rep	M	0:04:23.340-0:04:23.606	IT1	0.0909031	8	0.340545
Trial 1	1.3	Rep	M	0:04:23.606-0:04:23.872	IT1	0.0872816	8	0.326979
Trial 1	1.3	Rep	M	0:04:23.872-0:04:24.138	IT1	0.111755	8	0.418662
Trial 1	1.3	Rep	M	0:04:24.138-0:04:24.404	IT1	0.104883	8	0.392915
Trial 1	1.3	Rep	M	0:04:24.404-0:04:24.670	IT1	0.0516096	8	0.193342
Trial 1	1.3	Rep	M	0:04:24.670-0:04:24.936	IT1	0.118964	8	0.445666
Trial 1	1.3	Rep	M	0:04:24.936-0:04:25.202	IT1	0.486985	8	1.82437
Trial 1	1.3	Rep	M	0:04:25.202-0:04:25.468	IT1	0.909487	8	3.40716
Trial 1	1.3	Rep	M	0:04:25.468-0:04:25.734	IT1	0.685129	8	2.56667
Trial 1	1.3	Rep	M	0:04:25.734-0:04:26.000	IT1	0.276422	8	1.03555
Trial 1	1.3	Rep	M	0:04:26.000-0:04:26.266	IT1	0.439919	7	1.88348
Trial 1	1.3	Rep	M	0:04:26.266-0:04:26.532	IT1	0.587264	8	2.20004
Trial 1	1.3	Rep	M	0:04:26.532-0:04:26.798	IT1	0.21305	8	0.798136
Trial 1	1.3	Rep	M	0:04:26.798-0:04:27.064	IT1	0.181122	8	0.678526
Trial 1	1.3	Rep	M	0:04:27.064-0:04:27.330	IT1	0.153542	8	0.575205
Trial 1	1.3	Rep	M	0:04:27.330-0:04:27.596	IT1	0.10477	8	0.392493
Trial 1	1.3	Rep	M	0:04:27.596-0:04:27.862	IT1	0.0398137	8	0.149153
Trial 1	1.3	Rep	M	0:04:27.862-0:04:28.128	IT1	0.0696218	8	0.260819
Trial 1	1.3	Rep	M	0:04:28.128-0:04:28.394	IT1	0.1186	8	0.444303
Trial 1	1.3	Rep	M	0:04:28.394-0:04:28.660	IT1	0.137193	8	0.513961
Trial 1	1.3	Rep	M	0:04:28.660-0:04:28.926	IT1	0.101937	8	0.381884
Trial 1	1.3	Rep	M	0:04:28.926-0:04:29.192	IT1	0.115972	8	0.434463
Trial 1	1.3	Rep	M	0:04:29.192-0:04:29.458	IT1	0.080278	8	0.300742
Trial 1	1.3	Rep	M	0:04:29.458-0:04:29.724	IT1	0.103871	8	0.389127
Trial 1	1.3	Rep	M	0:04:29.724-0:04:29.990	IT1	0.0769196	8	0.28816
Trial 1	1.3	Rep	M	0:04:29.990-0:04:30.256	IT1	0.11303	8	0.423436
Trial 1	1.3	Rep	M	0:04:30.256-0:04:30.522	IT1	0.209502	8	0.78485
Trial 1	1.3	Rep	M	0:04:30.522-0:04:30.788	IT1	0.118145	8	0.442602
Trial 1	1.3	Rep	M	0:04:30.788-0:04:31.054	IT1	0.0694645	8	0.26023
Trial 1	1.3	Rep	M	0:04:31.054-0:04:31.320	IT1	0.0416959	8	0.156204
Trial 1	1.3	Rep	M	0:04:31.320-0:04:31.586	IT1	0.097617	8	0.365697
Trial 1	1.3	Rep	M	0:04:31.586-0:04:31.852	IT1	0.0743176	8	0.278412
Trial 1	1.3	Rep	M	0:04:31.852-0:04:32.118	IT1	0.0789472	8	0.295758
Trial 1	1.3	Rep	M	0:04:32.118-0:04:32.384	IT1	0.0975998	8	0.365633
Trial 1	1.3	Rep	M	0:04:32.384-0:04:32.650	IT1	0.0284176	8	0.10646
Trial 1	1.3	Rep	M	0:04:32.650-0:04:32.916	IT1	0.067444	8	0.252661
Trial 1	1.3	Rep	M	0:04:32.916-0:04:33.182	IT1	0.0602731	8	0.225798
Trial 1	1.3	Rep	M	0:04:33.182-0:04:33.448	IT1	0.0910366	8	0.341045
Trial 1	1.3	Rep	M	0:04:33.448-0:04:33.714	IT1	0.0338008	8	0.126626
Trial 1	1.3	Rep	M	0:04:33.714-0:04:33.980	IT1	0.0889132	8	0.333091
Trial 1	1.3	Rep	M	0:04:33.980-0:04:34.246	IT1	0.0745064	8	0.27912
Trial 1	1.3	Rep	M	0:04:34.246-0:04:34.512	IT1	0.0906353	8	0.339545
Trial 1	1.3	Rep	M	0:04:34.512-0:04:34.778	IT1	0.0869895	8	0.325882
Trial 1	1.3	Rep	M	0:04:34.778-0:04:35.044	IT1	0.0432006	8	0.16184
Trial 1	1.3	Rep	M	0:04:35.044-0:04:35.310	IT1	0.0921719	8	0.345303
Trial 1	1.3	Rep	M	0:04:35.310-0:04:35.576	IT1	0.0664781	8	0.249042
Trial 1	1.3	Rep	M	0:04:35.576-0:04:35.842	IT1	0.0837213	7	0.358447
Trial 1	1.3	Rep	M	0:04:35.842-0:04:36.108	IT1	0.031603	8	0.118393
Trial 1	1.3	Rep	M	0:04:36.108-0:04:36.374	IT1	0.0337453	8	0.126419
Trial 1	1.3	Rep	M	0:04:36.374-0:04:36.640	IT1	0.0294707	8	0.110405
Trial 1	1.3	Rep	M	0:04:36.640-0:04:36.906	IT1	0.0879645	8	0.329537
Trial 1	1.3	Rep	M	0:04:36.906-0:04:37.172	IT1	0.0732833	8	0.274536
Trial 1	1.3	Rep	M	0:04:37.172-0:04:37.438	IT1	0.0592448	8	0.221947
Trial 1	1.3	Rep	M	0:04:37.438-0:04:37.704	IT1	0.116013	8	0.434613
Trial 1	1.3	Rep	M	0:04:37.704-0:04:37.970	IT1	0.123821	8	0.463863
Trial 1	1.3	Rep	M	0:04:37.970-0:04:38.236	IT1	0.0891195	8	0.333866
Trial 1	1.3	Rep	M	0:04:38.236-0:04:38.502	IT1	0.0443391	8	0.166105
Trial 1	1.3	Rep	M	0:04:38.502-0:04:38.768	IT1	0.0682717	8	0.255763
Trial 1	1.3	Rep	M	0:04:38.768-0:04:39.034	IT1	0.0693375	8	0.259755
Trial 1	1.3	Rep	M	0:04:39.034-0:04:39.300	IT1	0.0667958	8	0.250232
Trial 1	1.3	Rep	M	0:04:39.300-0:04:39.566	IT1	0.0831495	8	0.311499
Trial 1	1.3	Rep	M	0:04:39.566-0:04:39.832	IT1	0.0551083	8	0.206449
Trial 1	1.3	Rep	M	0:04:39.832-0:04:40.098	IT1	0.357159	8	1.33801
Trial 1	1.3	Rep	M	0:04:40.098-0:04:40.364	IT1	0.248653	8	0.931516
Trial 1	1.3	Rep	M	0:04:40.364-0:04:40.630	IT1	0.109876	8	0.411622
Trial 1	1.3	Rep	M	0:04:40.630-0:04:40.896	IT1	0.213833	8	0.801076
Trial 1	1.3	Rep	M	0:04:40.896-0:04:41.162	IT1	0.255318	8	0.956483
Trial 1	1.3	Rep	M	0:04:41.162-0:04:41.428	IT1	0.117472	8	0.44008
Trial 1	1.3	Rep	M	0:04:41.428-0:04:41.694	IT1	0.0899564	8	0.336997
Trial 1	1.3	Rep	M	0:04:41.694-0:04:41.960	IT1	0.0809011	8	0.303075
Trial 1	1.3	Rep	M	0:04:41.960-0:04:42.226	IT1	0.13762	8	0.515559
Trial 1	1.3	Rep	M	0:04:42.226-0:04:42.492	IT1	0.135749	8	0.508549
Trial 1	1.3	Rep	M	0:04:42.492-0:04:42.758	IT1	0.156556	8	0.586499
Trial 1	1.3	Rep	M	0:04:42.758-0:04:43.024	IT1	0.111673	8	0.418354
Trial 1	1.3	Rep	M	0:04:43.024-0:04:43.290	IT1	0.0983685	8	0.368515
Trial 1	1.3	Rep	M	0:04:43.290-0:04:43.556	IT1	0.0857278	8	0.321158
Trial 1	1.3	Rep	M	0:04:43.556-0:04:43.822	IT1	0.0615382	8	0.230537
Trial 1	1.3	Rep	M	0:04:43.822-0:04:44.088	IT1	0.124755	8	0.467366
Trial 1	1.3	Rep	M	0:04:44.088-0:04:44.354	IT1	0.207347	8	0.776775
Trial 1	1.3	Rep	M	0:04:44.354-0:04:44.620	IT1	0.147863	8	0.553932
Trial 1	1.3	Rep	M	0:04:44.620-0:04:44.886	IT1	0.139977	8	0.524391
Trial 1	1.3	Rep	M	0:04:44.886-0:04:45.152	IT1	0.0642984	8	0.240877
Trial 1	1.3	Rep	M	0:04:45.152-0:04:45.418	IT1	0.101065	7	0.432703
Trial 1	1.3	Rep	M	0:04:45.418-0:04:45.684	IT1	0.08865	8	0.332107
Trial 1	1.3	Rep	M	0:04:45.684-0:04:45.950	IT1	0.0764011	8	0.286216
Trial 1	1.3	Rep	M	0:04:45.950-0:04:46.216	IT1	0.103049	8	0.386046
Trial 1	1.3	Rep	M	0:04:46.216-0:04:46.482	IT1	0.058673	8	0.219804
Trial 1	1.3	Rep	M	0:04:46.482-0:04:46.748	IT1	0.0992356	8	0.371762
Trial 1	1.3	Rep	M	0:04:46.748-0:04:47.014	IT1	0.0404089	8	0.151383
Trial 1	1.3	Rep	M	0:04:47.014-0:04:47.280	IT1	0.0914447	8	0.342575
Trial 1	1.3	Rep	M	0:04:47.280-0:04:47.546	IT1	0.0891359	8	0.333927
Trial 1	1.3	Rep	M	0:04:47.546-0:04:47.812	IT1	0.142561	8	0.53407
Trial 1	1.3	Rep	M	0:04:47.812-0:04:48.078	IT1	0.109803	8	0.411347
Trial 1	1.3	Rep	M	0:04:48.078-0:04:48.344	IT1	0.0741645	8	0.277838
Trial 1	1.3	Rep	M	0:04:48.344-0:04:48.610	IT1	0.127819	8	0.47884
Trial 1	1.3	Rep	M	0:04:48.610-0:04:48.876	IT1	0.200685	8	0.751817
Trial 1	1.3	Rep	M	0:04:48.876-0:04:49.142	IT1	0.255865	8	0.958531
Trial 1	1.3	Rep	M	0:04:49.142-0:04:49.408	IT1	0.15273	8	0.572164
Trial 1	1.3	Rep	M	0:04:49.408-0:04:49.674	IT1	0.161178	8	0.603814
Trial 1	1.3	Rep	M	0:04:49.674-0:04:49.940	IT1	0.165767	8	0.621005
Trial 1	1.3	Rep	M	0:04:49.940-0:04:50.206	IT1	0.143272	8	0.536736
Trial 1	1.3	Rep	M	0:04:50.206-0:04:50.472	IT1	0.115502	8	0.432701
Trial 1	1.3	Rep	M	0:04:50.472-0:04:50.738	IT1	0.143335	8	0.536968
Trial 1	1.3	Rep	M	0:04:50.738-0:04:51.004	IT1	0.0608522	8	0.227969
Trial 1	1.3	Rep	M	0:04:51.004-0:04:51.270	IT1	0.035891	8	0.134457
Trial 1	1.3	Rep	M	0:04:51.270-0:04:51.536	IT1	0.121878	8	0.456586
Trial 1	1.3	Rep	M	0:04:51.536-0:04:51.802	IT1	0.164194	8	0.615113
Trial 1	1.3	Rep	M	0:04:51.802-0:04:52.068	IT1	0.124383	8	0.465968
Trial 1	1.3	Rep	M	0:04:52.068-0:04:52.334	IT1	0.153085	8	0.573494
Trial 1	1.3	Rep	M	0:04:52.334-0:04:52.600	IT1	0.185204	8	0.693817
Trial 1	1.3	Rep	M	0:04:52.600-0:04:52.866	IT1	0.0996413	8	0.373282
Trial 1	1.3	Rep	M	0:04:52.866-0:04:53.132	IT1	0.0766156	8	0.287023
Trial 1	1.3	Rep	M	0:04:53.132-0:04:53.398	IT1	0.155948	8	0.584223
Trial 1	1.3	Rep	M	0:04:53.398-0:04:53.664	IT1	0.0671	8	0.251372
Trial 1	1.3	Rep	M	0:04:53.664-0:04:53.930	IT1	0.0854166	8	0.319992
Trial 1	1.3	Rep	M	0:04:53.930-0:04:54.196	IT1	0.0494818	8	0.185373
Trial 1	1.3	Rep	M	0:04:54.196-0:04:54.462	IT1	0.203774	8	0.763385
Trial 1	1.3	Rep	M	0:04:54.462-0:04:54.728	IT1	0.173734	7	0.743828
Trial 1	1.3	Rep	M	0:04:54.728-0:04:54.994	IT1	0.157444	8	0.589823
Trial 1	1.3	Rep	M	0:04:54.994-0:04:55.260	IT1	0.134977	8	0.505657
Trial 1	1.3	Rep	M	0:04:55.260-0:04:55.526	IT1	0.116482	8	0.436372
Trial 1	1.3	Rep	M	0:04:55.526-0:04:55.792	IT1	0.183682	8	0.68812
Trial 1	1.3	Rep	M	0:04:55.792-0:04:56.058	IT1	0.257844	8	0.965944
Trial 1	1.3	Rep	M	0:04:56.058-0:04:56.324	IT1	0.201043	8	0.753158
Trial 1	1.3	Rep	M	0:04:56.324-0:04:56.590	IT1	0.171482	8	0.642414
Trial 1	1.3	Rep	M	0:04:56.590-0:04:56.856	IT1	0.163879	8	0.61393
Trial 1	1.3	Rep	M	0:04:56.856-0:04:57.122	IT1	0.171165	8	0.641226
Trial 1	1.3	Rep	M	0:04:57.122-0:04:57.388	IT1	0.118822	8	0.445134
Trial 1	1.3	Rep	M	0:04:57.388-0:04:57.654	IT1	0.102602	8	0.384371
Trial 1	1.3	Rep	M	0:04:57.654-0:04:57.920	IT1	0.18829	8	0.705384
Trial 1	1.3	Rep	M	0:04:57.920-0:04:58.186	IT1	0.244991	8	0.917796
Trial 1	1.3	Rep	M	0:04:58.186-0:04:58.452	IT1	0.182681	8	0.684375
Trial 1	1.3	Rep	M	0:04:58.452-0:04:58.718	IT1	0.0986374	8	0.36952
Trial 1	1.3	Rep	M	0:04:58.718-0:04:58.984	IT1	0.106182	8	0.397786
Trial 1	1.3	Rep	M	0:04:58.984-0:04:59.250	IT1	0.0939404	8	0.351923
Trial 1	1.3	Rep	M	0:04:59.250-0:04:59.516	IT1	0.0699931	8	0.262211
Trial 1	1.3	Rep	M	0:04:59.516-0:04:59.782	IT1	0.0666542	8	0.249704
Trial 1	1.3	Rep	M	0:04:59.782-0:05:00.048	IT1	0.0896251	8	0.335759
Trial 1	1.3	Rep	M	0:05:00.048-0:05:00.314	IT1	0.0918515	8	0.3441
Trial 1	1.3	Rep	M	0:05:00.314-0:05:00.580	IT1	0.0845123	8	0.316606
Trial 1	1.3	Rep	M	0:05:00.580-0:05:00.846	IT1	0.0719213	8	0.269434
Trial 1	1.3	Rep	M	0:05:00.846-0:05:01.112	IT1	0.115123	8	0.431282
Trial 1	1.3	Rep	M	0:05:01.112-0:05:01.378	IT1	0.0737124	8	0.276145
Trial 1	1.3	Rep	M	0:05:01.378-0:05:01.644	IT1	0.134858	8	0.505212
Trial 1	1.3	Rep	M	0:05:01.644-0:05:01.910	IT1	0.0908148	8	0.340215
Trial 1	1.3	Rep	M	0:05:01.910-0:05:02.176	IT1	0.105238	8	0.39425
Trial 1	1.3	Rep	M	0:05:02.176-0:05:02.442	IT1	0.0956072	8	0.358169
Trial 1	1.3	Rep	M	0:05:02.442-0:05:02.708	IT1	0.14315	8	0.536275
Trial 1	1.3	Rep	M	0:05:02.708-0:05:02.974	IT1	0.205977	8	0.77164
Trial 1	1.3	Rep	M	0:05:02.974-0:05:03.240	IT1	0.127927	8	0.479246
Trial 1	1.3	Rep	M	0:05:03.240-0:05:03.506	IT1	0.136846	8	0.512657
Trial 1	1.3	Rep	M	0:05:03.506-0:05:03.772	IT1	0.140937	8	0.527987
Trial 1	1.3	Rep	M	0:05:03.772-0:05:04.038	IT1	0.140946	8	0.52802
Trial 1	1.3	Rep	M	0:05:04.038-0:05:04.304	IT1	0.0767326	7	0.328524
Trial 1	1.3	Rep	M	0:05:04.304-0:05:04.570	IT1	0.124492	8	0.466375
Trial 1	1.3	Rep	M	0:05:04.570-0:05:04.836	IT1	0.0852044	8	0.319196
Trial 1	1.3	Rep	M	0:05:04.836-0:05:05.102	IT1	0.0905595	8	0.339256
Trial 1	1.3	Rep	M	0:05:05.102-0:05:05.368	IT1	0.0990341	8	0.371009
Trial 1	1.3	Rep	M	0:05:05.368-0:05:05.634	IT1	0.0493216	8	0.18477
Trial 1	1.3	Rep	M	0:05:05.634-0:05:05.900	IT1	0.109484	8	0.410155
Trial 1	1.3	Rep	M	0:05:05.900-0:05:06.166	IT1	0.091919	8	0.34435
Trial 1	1.3	Rep	M	0:05:06.166-0:05:06.432	IT1	0.120438	8	0.451189
Trial 1	1.3	Rep	M	0:05:06.432-0:05:06.698	IT1	0.106695	8	0.399706
Trial 1	1.3	Rep	M	0:05:06.698-0:05:06.964	IT1	0.096437	8	0.361275
Trial 1	1.3	Rep	M	0:05:06.964-0:05:07.230	IT1	0.089067	8	0.333667
Trial 1	1.3	Rep	M	0:05:07.230-0:05:07.496	IT1	0.133124	8	0.498715
Trial 1	1.3	Rep	M	0:05:07.496-0:05:07.762	IT1	0.148377	8	0.555855
Trial 1	1.3	Rep	M	0:05:07.762-0:05:08.028	IT1	0.0285771	8	0.107057
Trial 1	1.3	Rep	M	0:05:08.028-0:05:08.294	IT1	0.160775	8	0.602304
Trial 1	1.3	Rep	M	0:05:08.294-0:05:08.560	IT1	0.0548074	8	0.205322
Trial 1	1.3	Rep	M	0:05:08.560-0:05:08.826	IT1	0.248942	8	0.932597
Trial 1	1.3	Rep	M	0:05:08.826-0:05:09.092	IT1	0.167479	8	0.627414
Trial 1	1.3	Rep	M	0:05:09.092-0:05:09.358	IT1	0.199109	8	0.745914
Trial 1	1.3	Rep	M	0:05:09.358-0:05:09.624	IT1	0.252274	8	0.945081
Trial 1	1.3	Rep	M	0:05:09.624-0:05:09.890	IT1	0.195028	8	0.730623
Trial 1	1.3	Rep	M	0:05:09.890-0:05:10.156	IT1	0.203281	8	0.761536
Trial 1	1.3	Rep	M	0:05:10.156-0:05:10.422	IT1	0.131131	8	0.491247
Trial 1	1.3	Rep	M	0:05:10.422-0:05:10.688	IT1	0.170729	8	0.639595
Trial 1	1.3	Rep	M	0:05:10.688-0:05:10.954	IT1	0.134551	8	0.504061
Trial 1	1.3	Rep	M	0:05:10.954-0:05:11.220	IT1	0.162109	8	0.607303
Trial 1	1.3	Rep	M	0:05:11.220-0:05:11.486	IT1	0.14088	8	0.52777
Trial 1	1.3	Rep	M	0:05:11.486-0:05:11.752	IT1	0.104733	8	0.392355
Trial 1	1.3	Rep	M	0:05:11.752-0:05:12.018	IT1	0.0791252	8	0.296426
Trial 1	1.3	Rep	M	0:05:12.018-0:05:12.284	IT1	0.0560678	8	0.210043
Trial 1	1.3	Rep	M	0:05:12.284-0:05:12.550	IT1	0.123479	8	0.462585
Trial 1	1.3	Rep	M	0:05:12.550-0:05:12.816	IT1	0.124495	8	0.46639
Trial 1	1.3	Rep	M	0:05:12.816-0:05:13.082	IT1	0.247602	8	0.927575
Trial 1	1.3	Rep	M	0:05:13.082-0:05:13.348	IT1	0.285108	8	1.06809
Trial 1	1.3	Rep	M	0:05:13.348-0:05:13.614	IT1	0.183926	8	0.689029
Trial 1	1.3	Rep	M	0:05:13.614-0:05:13.880	IT1	0.141791	7	0.607064
Trial 1	1.3	Rep	M	0:05:13.880-0:05:14.146	IT1	0.262097	8	0.981884
Trial 1	1.3	Rep	M	0:05:14.146-0:05:14.412	IT1	0.187892	8	0.703887
Trial 1	1.3	Rep	M	0:05:14.412-0:05:14.678	IT1	0.116463	8	0.4363
Trial 1	1.3	Rep	M	0:05:14.678-0:05:14.944	IT1	0.11798	8	0.441984
Trial 1	1.3	Rep	M	0:05:14.944-0:05:15.210	IT1	0.0837226	8	0.313644
Trial 1	1.3	Rep	M	0:05:15.210-0:05:15.476	IT1	0.108864	8	0.407833
Trial 1	1.3	Rep	M	0:05:15.476-0:05:15.742	IT1	0.0793441	8	0.297242
Trial 1	1.3	Rep	M	0:05:15.742-0:05:16.008	IT1	0.10547	8	0.395116
Trial 1	1.3	Rep	M	0:05:16.008-0:05:16.274	IT1	0.0887296	8	0.332405
Trial 1	1.3	Rep	M	0:05:16.274-0:05:16.540	IT1	0.137205	8	0.514004
Trial 1	1.3	Rep	M	0:05:16.540-0:05:16.806	IT1	0.137644	8	0.515648
Trial 1	1.3	Rep	M	0:05:16.806-0:05:17.072	IT1	0.0679543	8	0.254573
Trial 1	1.3	Rep	M	0:05:17.072-0:05:17.338	IT1	0.14713	8	0.551184
Trial 1	1.3	Rep	M	0:05:17.338-0:05:17.604	IT1	0.122841	8	0.460196
Trial 1	1.3	Rep	M	0:05:17.604-0:05:17.870	IT1	0.105437	8	0.394992
Trial 1	1.3	Rep	M	0:05:17.870-0:05:18.136	IT1	0.0521559	8	0.195389
Trial 1	1.3	Rep	M	0:05:18.136-0:05:18.402	IT1	0.163442	8	0.612293
Trial 1	1.3	Rep	M	0:05:18.402-0:05:18.668	IT1	0.0867034	8	0.324813
Trial 1	1.3	Rep	M	0:05:18.668-0:05:18.934	IT1	0.0745774	8	0.279385
Trial 1	1.3	Rep	M	0:05:18.934-0:05:19.200	IT1	0.0917994	8	0.343903
Trial 1	1.3	Rep	M	0:05:19.200-0:05:19.466	IT1	0.0218809	8	0.081972
Trial 1	1.3	Rep	M	0:05:19.466-0:05:19.732	IT1	0.164637	8	0.616768
Trial 1	1.3	Rep	M	0:05:19.732-0:05:19.998	IT1	0.0714507	8	0.267672
Trial 1	1.3	Rep	M	0:05:19.998-0:05:20.264	IT1	0.220579	8	0.826347
Trial 1	1.3	Rep	M	0:05:20.264-0:05:20.530	IT1	0.0542336	8	0.203172
Trial 1	1.3	Rep	M	0:05:20.530-0:05:20.796	IT1	0.337519	8	1.26443
Trial 1	1.3	Rep	M	0:05:20.796-0:05:21.062	IT1	0.17732	8	0.664285
Trial 1	1.3	Rep	M	0:05:21.062-0:05:21.328	IT1	0.159924	8	0.599118
Trial 1	1.3	Rep	M	0:05:21.328-0:05:21.594	IT1	0.146709	8	0.549615
Trial 1	1.3	Rep	M	0:05:21.594-0:05:21.860	IT1	0.119532	8	0.447795
Trial 1	1.3	Rep	M	0:05:21.860-0:05:22.126	IT1	0.126197	8	0.472762
Trial 1	1.3	Rep	M	0:05:22.126-0:05:22.392	IT1	0.0948403	8	0.355293
Trial 1	1.3	Rep	M	0:05:22.392-0:05:22.658	IT1	0.0727962	8	0.272713
Trial 1	1.3	Rep	M	0:05:22.658-0:05:22.924	IT1	0.0779296	8	0.291945
Trial 1	1.3	Rep	M	0:05:22.924-0:05:23.190	IT1	0.144592	8	0.541678
Trial 1	1.3	Rep	M	0:05:23.190-0:05:23.456	IT1	0.17747	7	0.759825
Trial 1	1.3	Rep	M	0:05:23.456-0:05:23.722	IT1	0.203582	8	0.76267
Trial 1	1.3	Rep	M	0:05:23.722-0:05:23.988	IT1	0.267098	8	1.00061
Trial 1	1.3	Rep	M	0:05:23.988-0:05:24.254	IT1	0.325961	8	1.22113
Trial 1	1.3	Rep	M	0:05:24.254-0:05:24.520	IT1	0.805605	8	3.01799
Trial 1	1.3	Rep	M	0:05:24.520-0:05:24.786	IT1	0.621549	8	2.32848
Trial 1	1.3	Rep	M	0:05:24.786-0:05:25.052	IT1	0.441284	8	1.65317
Trial 1	1.3	Rep	M	0:05:25.052-0:05:25.318	IT1	0.597036	8	2.23664
Trial 1	1.3	Rep	M	0:05:25.318-0:05:25.584	IT1	0.428272	8	1.60441
Trial 1	1.3	Rep	M	0:05:25.584-0:05:25.850	IT1	0.832226	8	3.11772
Trial 1	1.3	Rep	M	0:05:25.850-0:05:26.116	IT1	0.480373	8	1.79959
Trial 1	1.3	Rep	M	0:05:26.116-0:05:26.382	IT1	1.00202	8	3.75383
Trial 1	1.3	Rep	M	0:05:26.382-0:05:26.648	IT1	0.668055	8	2.5027
Trial 1	1.3	Rep	M	0:05:26.648-0:05:26.914	IT1	0.181657	8	0.680533
Trial 1	1.3	Rep	M	0:05:26.914-0:05:27.180	IT1	0.0702508	8	0.263176
Trial 1	1.3	Rep	M	0:05:27.180-0:05:27.446	IT1	0.0640137	8	0.239811
Trial 1	1.3	Rep	M	0:05:27.446-0:05:27.712	IT1	0.0828863	8	0.310512
Trial 1	1.3	Rep	M	0:05:27.712-0:05:27.978	IT1	0.136725	8	0.512205
Trial 1	1.3	Rep	M	0:05:27.978-0:05:28.244	IT1	0.286732	8	1.07417
Trial 1	1.3	Rep	M	0:05:28.244-0:05:28.510	IT1	0.0688731	8	0.258015
Trial 1	1.3	Rep	M	0:05:28.510-0:05:28.776	IT1	0.0658229	8	0.246589
Trial 1	1.3	Rep	M	0:05:28.776-0:05:29.042	IT1	0.0349734	8	0.13102
Trial 1	1.3	Rep	M	0:05:29.042-0:05:29.308	IT1	0.0398781	8	0.149394
Trial 1	1.3	Rep	M	0:05:29.308-0:05:29.574	IT1	0.0390863	8	0.146427
Trial 1	1.3	Rep	M	0:05:29.574-0:05:29.840	IT1	0.0634479	8	0.237691
Trial 1	1.3	Rep	M	0:05:29.840-0:05:30.106	IT1	0.0620439	8	0.232431
Trial 1	1.3	Rep	M	0:05:30.106-0:05:30.372	IT1	0.0625605	8	0.234367
Trial 1	1.3	Rep	M	0:05:30.372-0:05:30.638	IT1	0.130738	8	0.489777
Trial 1	1.3	Rep	M	0:05:30.638-0:05:30.904	IT1	0.261743	8	0.980555
Trial 1	1.3	Rep	M	0:05:30.904-0:05:31.170	IT1	0.161655	8	0.605595
Trial 1	1.3	Rep	M	0:05:31.170-0:05:31.436	IT1	0.0587004	8	0.219906
Trial 1	1.3	Rep	M	0:05:31.436-0:05:31.702	IT1	0.149386	8	0.559639
Trial 1	1.3	Rep	M	0:05:31.702-0:05:31.968	IT1	0.17401	8	0.651889
Trial 1	1.3	Rep	M	0:05:31.968-0:05:32.234	IT1	0.251206	8	0.941083
Trial 1	1.3	Rep	M	0:05:32.234-0:05:32.500	IT1	0.0825172	8	0.30913
Trial 1	1.3	Rep	M	0:05:32.500-0:05:32.766	IT1	0.103268	7	0.442134
Trial 1	1.3	Rep	M	0:05:32.766-0:05:33.032	IT1	0.276664	8	1.03645
Trial 1	1.3	Rep	M	0:05:33.032-0:05:33.298	IT1	0.16356	8	0.61274
Trial 1	1.3	Rep	M	0:05:33.298-0:05:33.564	IT1	0.0892042	8	0.334181
Trial 1	1.3	Rep	M	0:05:33.564-0:05:33.830	IT1	0.0934928	8	0.350247
Trial 1	1.3	Rep	M	0:05:33.830-0:05:34.096	IT1	0.106766	8	0.399975
Trial 1	1.3	Rep	M	0:05:34.096-0:05:34.362	IT1	0.265828	8	0.995851
Trial 1	1.3	Rep	M	0:05:34.362-0:05:34.628	IT1	0.502215	8	1.88143
Trial 1	1.3	Rep	M	0:05:34.628-0:05:34.894	IT1	0.280457	8	1.05066
Trial 1	1.3	Rep	M	0:05:34.894-0:05:35.160	IT1	0.179944	8	0.674123
Trial 1	1.3	Rep	M	0:05:35.160-0:05:35.426	IT1	0.479611	8	1.79675
Trial 1	1.3	Rep	M	0:05:35.426-0:05:35.692	IT1	0.323155	8	1.21062
Trial 1	1.3	Rep	M	0:05:35.692-0:05:35.958	IT1	0.689368	8	2.58255
Trial 1	1.3	Rep	M	0:05:35.958-0:05:36.224	IT1	1.1325	8	4.24263
Trial 1	1.3	Rep	M	0:05:36.224-0:05:36.490	IT1	0.819324	8	3.0694
Trial 1	1.3	Rep	M	0:05:36.490-0:05:36.756	IT1	1.0634	8	3.98376
Trial 1	1.3	Rep	M	0:05:36.756-0:05:37.022	IT1	0.472632	8	1.77059
Trial 1	1.3	Rep	M	0:05:37.022-0:05:37.288	IT1	0.433658	8	1.62459
Trial 1	1.3	Rep	M	0:05:37.288-0:05:37.554	IT1	0.650445	8	2.43673
Trial 1	1.3	Rep	M	0:05:37.554-0:05:37.820	IT1	0.506063	8	1.89585
Trial 1	1.3	Rep	M	0:05:37.820-0:05:38.086	IT1	0.359826	8	1.348
Trial 1	1.3	Rep	M	0:05:38.086-0:05:38.352	IT1	0.523709	8	1.96194
Trial 1	1.3	Rep	M	0:05:38.352-0:05:38.618	IT1	0.202642	8	0.759152
Trial 1	1.3	Rep	M	0:05:38.618-0:05:38.884	IT1	0.0879969	8	0.329658
Trial 1	1.3	Rep	M	0:05:38.884-0:05:39.150	IT1	0.21402	8	0.801774
Trial 1	1.3	Rep	M	0:05:39.150-0:05:39.416	IT1	0.313146	8	1.17312
Trial 1	1.3	Rep	M	0:05:39.416-0:05:39.682	IT1	0.241569	8	0.904977
Trial 1	1.3	Rep	M	0:05:39.682-0:05:39.948	IT1	0.247183	8	0.926007
Trial 1	1.3	Rep	M	0:05:39.948-0:05:40.214	IT1	0.181277	8	0.679107
Trial 1	1.3	Rep	M	0:05:40.214-0:05:40.480	IT1	0.174566	8	0.653967
Trial 1	1.3	Rep	M	0:05:40.480-0:05:40.746	IT1	0.0880097	8	0.329705
Trial 1	1.3	Rep	M	0:05:40.746-0:05:41.012	IT1	0.0432424	8	0.161996
Trial 1	1.3	Rep	M	0:05:41.012-0:05:41.278	IT1	0.225019	8	0.842979
Trial 1	1.3	Rep	M	0:05:41.278-0:05:41.544	IT1	0.265486	8	0.994578
Trial 1	1.3	Rep	M	0:05:41.544-0:05:41.810	IT1	0.202815	8	0.759797
Trial 1	1.3	Rep	M	0:05:41.810-0:05:42.076	IT1	0.0859098	8	0.321839
Trial 1	1.3	Rep	M	0:05:42.076-0:05:42.342	IT1	0.0928618	7	0.397582
Trial 1	1.3	Rep	M	0:05:42.342-0:05:42.608	IT1	0.0857046	8	0.321073
Trial 1	1.3	Rep	M	0:05:42.608-0:05:42.874	IT1	0.0459286	8	0.172061
Trial 1	1.3	Rep	M	0:05:42.874-0:05:43.140	IT1	0.119969	8	0.449434
Trial 1	1.3	Rep	M	0:05:43.140-0:05:43.406	IT1	0.154264	8	0.577914
Trial 1	1.3	Rep	M	0:05:43.406-0:05:43.672	IT1	0.141634	8	0.530594
Trial 1	1.3	Rep	M	0:05:43.672-0:05:43.938	IT1	0.0959585	8	0.359485
Trial 1	1.3	Rep	M	0:05:43.938-0:05:44.204	IT1	0.093614	8	0.350702
Trial 1	1.3	Rep	M	0:05:44.204-0:05:44.470	IT1	0.0612434	8	0.229432
Trial 1	1.3	Rep	M	0:05:44.470-0:05:44.736	IT1	0.0313436	8	0.117421
Trial 1	1.3	Rep	M	0:05:44.736-0:05:45.002	IT1	0.0802701	8	0.300713
Trial 1	1.3	Rep	M	0:05:45.002-0:05:45.268	IT1	0.161043	8	0.603308
Trial 1	1.3	Rep	M	0:05:45.268-0:05:45.534	IT1	0.187755	8	0.703374
Trial 1	1.3	Rep	M	0:05:45.534-0:05:45.800	IT1	0.33479	8	1.2542
Trial 1	1.3	Rep	M	0:05:45.800-0:05:46.066	IT1	0.227399	8	0.851894
Trial 1	1.3	Rep	M	0:05:46.066-0:05:46.332	IT1	0.176324	8	0.660554
Trial 1	1.3	Rep	M	0:05:46.332-0:05:46.598	IT1	0.323401	8	1.21154
Trial 1	1.3	Rep	M	0:05:46.598-0:05:46.864	IT1	0.235289	8	0.881447
Trial 1	1.3	Rep	M	0:05:46.864-0:05:47.130	IT1	0.382022	8	1.43114
Trial 1	1.3	Rep	M	0:05:47.130-0:05:47.396	IT1	0.190107	8	0.712192
Trial 1	1.3	Rep	M	0:05:47.396-0:05:47.662	IT1	0.152484	8	0.571241
Trial 1	1.3	Rep	M	0:05:47.662-0:05:47.928	IT1	0.095027	8	0.355996
Trial 1	1.3	Rep	M	0:05:47.928-0:05:48.194	IT1	0.252889	8	0.947382
Trial 1	1.3	Rep	M	0:05:48.194-0:05:48.460	IT1	0.209239	8	0.783858
Trial 1	1.3	Rep	M	0:05:48.460-0:05:48.726	IT1	0.158099	8	0.592276
Trial 1	1.3	Rep	M	0:05:48.726-0:05:48.992	IT1	0.224178	8	0.839824
Trial 1	1.3	Rep	M	0:05:48.992-0:05:49.258	IT1	0.122545	8	0.459083
Trial 1	1.3	Rep	M	0:05:49.258-0:05:49.524	IT1	0.215735	8	0.808195
Trial 1	1.3	Rep	M	0:05:49.524-0:05:49.790	IT1	0.105403	8	0.394868
Trial 1	1.3	Rep	M	0:05:49.790-0:05:50.056	IT1	0.0286593	8	0.107365
Trial 1	1.3	Rep	M	0:05:50.056-0:05:50.322	CS2a	0.233961	8	0.876483
Trial 1	1.3	Rep	M	0:05:50.322-0:05:50.588	CS2a	0.122247	8	0.45797
Trial 1	1.3	Rep	M	0:05:50.588-0:05:50.854	CS2a	0.201585	8	0.755185
Trial 1	1.3	Rep	M	0:05:50.854-0:05:51.120	CS2a	0.112096	8	0.41994
Trial 1	1.3	Rep	M	0:05:51.120-0:05:51.386	CS2a	0.0957466	8	0.35869
Trial 1	1.3	Rep	M	0:05:51.386-0:05:51.652	CS2a	0.0983021	8	0.368263
Trial 1	1.3	Rep	M	0:05:51.652-0:05:51.918	CS2a	0.117605	7	0.503516
Trial 1	1.3	Rep	M	0:05:51.918-0:05:52.184	CS2a	0.43296	8	1.62198
Trial 1	1.3	Rep	M	0:05:52.184-0:05:52.450	CS2a	0.133387	8	0.499699
Trial 1	1.3	Rep	M	0:05:52.450-0:05:52.716	CS2a	0.0752945	8	0.282072
Trial 1	1.3	Rep	M	0:05:52.716-0:05:52.982	CS2a	0.052911	8	0.19822
Trial 1	1.3	Rep	M	0:05:52.982-0:05:53.248	CS2a	0.218002	8	0.816697
Trial 1	1.3	Rep	M	0:05:53.248-0:05:53.514	CS2a	0.142813	8	0.535016
Trial 1	1.3	Rep	M	0:05:53.514-0:05:53.780	CS2a	0.364882	8	1.36693
Trial 1	1.3	Rep	M	0:05:53.780-0:05:54.046	CS2a	0.166945	8	0.625416
Trial 1	1.3	Rep	M	0:05:54.046-0:05:54.312	CS2a	0.355422	8	1.3315
Trial 1	1.3	Rep	M	0:05:54.312-0:05:54.578	CS2a	0.083922	8	0.314393
Trial 1	1.3	Rep	M	0:05:54.578-0:05:54.844	CS2a	0.0635225	8	0.237973
Trial 1	1.3	Rep	M	0:05:54.844-0:05:55.110	CS2a	0.0717883	8	0.268936
Trial 1	1.3	Rep	M	0:05:55.110-0:05:55.376	CS2a	0.0567913	8	0.212755
Trial 1	1.3	Rep	M	0:05:55.376-0:05:55.642	CS2a	0.0811573	8	0.304035
Trial 1	1.3	Rep	M	0:05:55.642-0:05:55.908	CS2a	0.0441003	8	0.16521
Trial 1	1.3	Rep	M	0:05:55.908-0:05:56.174	CS2a	0.034854	8	0.130572
Trial 1	1.3	Rep	M	0:05:56.174-0:05:56.440	CS2a	0.0928211	8	0.347731
Trial 1	1.3	Rep	M	0:05:56.440-0:05:56.706	CS2a	0.0527857	8	0.197749
Trial 1	1.3	Rep	M	0:05:56.706-0:05:56.972	CS2a	0.0881558	8	0.330254
Trial 1	1.3	Rep	M	0:05:56.972-0:05:57.238	CS2a	0.0426312	8	0.159707
Trial 1	1.3	Rep	M	0:05:57.238-0:05:57.504	CS2a	0.0698398	8	0.261638
Trial 1	1.3	Rep	M	0:05:57.504-0:05:57.770	CS2a	0.0439563	8	0.164671
Trial 1	1.3	Rep	M	0:05:57.770-0:05:58.036	CS2a	0.077048	8	0.28864
Trial 1	1.3	Rep	M	0:05:58.036-0:05:58.302	CS2a	0.0498666	8	0.186813
Trial 1	1.3	Rep	M	0:05:58.302-0:05:58.568	CS2a	0.0756996	8	0.283588
Trial 1	1.3	Rep	M	0:05:58.568-0:05:58.834	CS2a	0.0693749	8	0.259895
Trial 1	1.3	Rep	M	0:05:58.834-0:05:59.100	CS2a	0.0477934	8	0.179046
Trial 1	1.3	Rep	M	0:05:59.100-0:05:59.366	CS2a	0.0833253	8	0.312158
Trial 1	1.3	Rep	M	0:05:59.366-0:05:59.632	CS2a	0.0233765	8	0.0875747
Trial 1	1.3	Rep	M	0:05:59.632-0:05:59.898	CS2a	0.0535541	8	0.200627
Trial 1	1.3	Rep	M	0:05:59.898-0:06:00.164	CS2a	0.0688079	8	0.257773
Trial 1	1.3	Rep	M	0:06:00.164-0:06:00.430	CS2b	0.651854	8	2.44201
Trial 1	1.3	Rep	M	0:06:00.430-0:06:00.696	CS2b	0.444547	8	1.66539
Trial 1	1.3	Rep	M	0:06:00.696-0:06:00.962	CS2b	0.146082	8	0.547257
Trial 1	1.3	Rep	M	0:06:00.962-0:06:01.228	CS2b	0.146436	8	0.548584
Trial 1	1.3	Rep	M	0:06:01.228-0:06:01.494	CS2b	0.224875	7	0.962784
Trial 1	1.3	Rep	M	0:06:01.494-0:06:01.760	CS2b	0.170781	8	0.639791
Trial 1	1.3	Rep	M	0:06:01.760-0:06:02.026	CS2b	0.156408	8	0.585942
Trial 1	1.3	Rep	M	0:06:02.026-0:06:02.292	CS2b	0.185523	8	0.695021
Trial 1	1.3	Rep	M	0:06:02.292-0:06:02.558	CS2b	0.116773	8	0.437462
Trial 1	1.3	Rep	M	0:06:02.558-0:06:02.824	CS2b	0.157517	8	0.590096
Trial 1	1.3	Rep	M	0:06:02.824-0:06:03.090	CS2b	0.655627	8	2.45616
Trial 1	1.3	Rep	M	0:06:03.090-0:06:03.356	CS2b	9.5597	8	35.813
Trial 1	1.3	Rep	M	0:06:03.356-0:06:03.622	CS2b	8.95245	8	33.5382
Trial 1	1.3	Rep	M	0:06:03.622-0:06:03.888	CS2b	3.65787	8	13.7032
Trial 1	1.3	Rep	M	0:06:03.888-0:06:04.154	CS2b	1.33463	8	4.99982
Trial 1	1.3	Rep	M	0:06:04.154-0:06:04.420	CS2b	0.948495	8	3.55333
Trial 1	1.3	Rep	M	0:06:04.420-0:06:04.686	CS2b	0.336013	8	1.25879
Trial 1	1.3	Rep	M	0:06:04.686-0:06:04.952	CS2b	0.390091	8	1.46138
Trial 1	1.3	Rep	M	0:06:04.952-0:06:05.218	CS2b	0.348986	8	1.3074
Trial 1	1.3	Rep	M	0:06:05.218-0:06:05.484	CS2b	0.217534	8	0.814935
Trial 1	1.3	Rep	M	0:06:05.484-0:06:05.750	CS2b	0.120372	8	0.450947
Trial 1	1.3	Rep	M	0:06:05.750-0:06:06.016	CS2b	0.530057	8	1.98571
Trial 1	1.3	Rep	M	0:06:06.016-0:06:06.282	CS2b	1.64875	8	6.17666
Trial 1	1.3	Rep	M	0:06:06.282-0:06:06.548	CS2b	1.95653	8	7.32964
Trial 1	1.3	Rep	M	0:06:06.548-0:06:06.814	CS2b	0.541367	8	2.02809
Trial 1	1.3	Rep	M	0:06:06.814-0:06:07.080	CS2b	0.206938	8	0.775239
Trial 1	1.3	Rep	M	0:06:07.080-0:06:07.346	CS2b	0.112375	8	0.420983
Trial 1	1.3	Rep	M	0:06:07.346-0:06:07.612	CS2b	0.0881253	8	0.330141
Trial 1	1.3	Rep	M	0:06:07.612-0:06:07.878	CS2b	0.151703	8	0.568317
Trial 1	1.3	Rep	M	0:06:07.878-0:06:08.144	CS2b	0.120138	8	0.450066
Trial 1	1.3	Rep	M	0:06:08.144-0:06:08.410	CS2b	0.0930602	8	0.348628
Trial 1	1.3	Rep	M	0:06:08.410-0:06:08.676	CS2b	0.0988848	8	0.370446
Trial 1	1.3	Rep	M	0:06:08.676-0:06:08.942	CS2b	0.105314	8	0.394534
Trial 1	1.3	Rep	M	0:06:08.942-0:06:09.208	CS2b	0.089354	8	0.334743
Trial 1	1.3	Rep	M	0:06:09.208-0:06:09.474	CS2b	0.0821007	8	0.30757
Trial 1	1.3	Rep	M	0:06:09.474-0:06:09.740	CS2b	0.0541129	8	0.202721
Trial 1	1.3	Rep	M	0:06:09.740-0:06:10.006	CS2b	0.0937122	8	0.351069
Trial 1	1.3	Rep	M	0:06:10.006-0:06:10.272	IT2	0.544671	8	2.04048
Trial 1	1.3	Rep	M	0:06:10.272-0:06:10.538	IT2	6.47863	8	24.2705
Trial 1	1.3	Rep	M	0:06:10.538-0:06:10.804	IT2	7.51855	7	32.1901
Trial 1	1.3	Rep	M	0:06:10.804-0:06:11.070	IT2	2.49379	8	9.34237
Trial 1	1.3	Rep	M	0:06:11.070-0:06:11.336	IT2	2.73861	8	10.2595
Trial 1	1.3	Rep	M	0:06:11.336-0:06:11.602	IT2	1.38973	8	5.20627
Trial 1	1.3	Rep	M	0:06:11.602-0:06:11.868	IT2	0.549421	8	2.05828
Trial 1	1.3	Rep	M	0:06:11.868-0:06:12.134	IT2	0.823774	8	3.08605
Trial 1	1.3	Rep	M	0:06:12.134-0:06:12.400	IT2	1.79853	8	6.73774
Trial 1	1.3	Rep	M	0:06:12.400-0:06:12.666	IT2	0.597099	8	2.2369
Trial 1	1.3	Rep	M	0:06:12.666-0:06:12.932	IT2	1.46645	8	5.49363
Trial 1	1.3	Rep	M	0:06:12.932-0:06:13.198	IT2	0.472654	8	1.77069
Trial 1	1.3	Rep	M	0:06:13.198-0:06:13.464	IT2	0.676665	8	2.53495
Trial 1	1.3	Rep	M	0:06:13.464-0:06:13.730	IT2	0.226823	8	0.849733
Trial 1	1.3	Rep	M	0:06:13.730-0:06:13.996	IT2	0.194884	8	0.730087
Trial 1	1.3	Rep	M	0:06:13.996-0:06:14.262	IT2	0.553387	8	2.07313
Trial 1	1.3	Rep	M	0:06:14.262-0:06:14.528	IT2	0.61806	8	2.31541
Trial 1	1.3	Rep	M	0:06:14.528-0:06:14.794	IT2	0.793723	8	2.97347
Trial 1	1.3	Rep	M	0:06:14.794-0:06:15.060	IT2	1.09525	8	4.10309
Trial 1	1.3	Rep	M	0:06:15.060-0:06:15.326	IT2	0.84872	8	3.17952
Trial 1	1.3	Rep	M	0:06:15.326-0:06:15.592	IT2	0.427259	8	1.60062
Trial 1	1.3	Rep	M	0:06:15.592-0:06:15.858	IT2	0.773077	8	2.89614
Trial 1	1.3	Rep	M	0:06:15.858-0:06:16.124	IT2	1.45716	8	5.4589
Trial 1	1.3	Rep	M	0:06:16.124-0:06:16.390	IT2	1.43293	8	5.36811
Trial 1	1.3	Rep	M	0:06:16.390-0:06:16.656	IT2	0.595646	8	2.23145
Trial 1	1.3	Rep	M	0:06:16.656-0:06:16.922	IT2	0.670967	8	2.51361
Trial 1	1.3	Rep	M	0:06:16.922-0:06:17.188	IT2	0.533062	8	1.99699
Trial 1	1.3	Rep	M	0:06:17.188-0:06:17.454	IT2	0.390311	8	1.4622
Trial 1	1.3	Rep	M	0:06:17.454-0:06:17.720	IT2	0.823162	8	3.08377
Trial 1	1.3	Rep	M	0:06:17.720-0:06:17.986	IT2	0.951916	8	3.56612
Trial 1	1.3	Rep	M	0:06:17.986-0:06:18.252	IT2	0.607013	8	2.27402
Trial 1	1.3	Rep	M	0:06:18.252-0:06:18.518	IT2	0.820198	8	3.07267
Trial 1	1.3	Rep	M	0:06:18.518-0:06:18.784	IT2	1.03582	8	3.88045
Trial 1	1.3	Rep	M	0:06:18.784-0:06:19.050	IT2	0.910456	8	3.4108
Trial 1	1.3	Rep	M	0:06:19.050-0:06:19.316	IT2	0.169244	8	0.634033
Trial 1	1.3	Rep	M	0:06:19.316-0:06:19.582	IT2	1.13975	8	4.26979
Trial 1	1.3	Rep	M	0:06:19.582-0:06:19.848	IT2	0.98423	8	3.68717
Trial 1	1.3	Rep	M	0:06:19.848-0:06:20.114	IT2	0.649115	8	2.43175
Trial 1	1.3	Rep	M	0:06:20.114-0:06:20.380	IT2	0.719358	7	3.07988
Trial 1	1.3	Rep	M	0:06:20.380-0:06:20.646	IT2	0.458768	8	1.71866
Trial 1	1.3	Rep	M	0:06:20.646-0:06:20.912	IT2	0.305229	8	1.14346
Trial 1	1.3	Rep	M	0:06:20.912-0:06:21.178	IT2	0.342446	8	1.28288
Trial 1	1.3	Rep	M	0:06:21.178-0:06:21.444	IT2	0.616196	8	2.30843
Trial 1	1.3	Rep	M	0:06:21.444-0:06:21.710	IT2	0.689956	8	2.58475
Trial 1	1.3	Rep	M	0:06:21.710-0:06:21.976	IT2	0.626885	8	2.34847
Trial 1	1.3	Rep	M	0:06:21.976-0:06:22.242	IT2	1.06612	8	3.99399
Trial 1	1.3	Rep	M	0:06:22.242-0:06:22.508	IT2	0.407772	8	1.52761
Trial 1	1.3	Rep	M	0:06:22.508-0:06:22.774	IT2	0.698262	8	2.61586
Trial 1	1.3	Rep	M	0:06:22.774-0:06:23.040	IT2	0.764224	8	2.86297
Trial 1	1.3	Rep	M	0:06:23.040-0:06:23.306	IT2	0.169002	8	0.633124
Trial 1	1.3	Rep	M	0:06:23.306-0:06:23.572	IT2	0.118528	8	0.444035
Trial 1	1.3	Rep	M	0:06:23.572-0:06:23.838	IT2	1.32987	8	4.982
Trial 1	1.3	Rep	M	0:06:23.838-0:06:24.104	IT2	1.27352	8	4.77095
Trial 1	1.3	Rep	M	0:06:24.104-0:06:24.370	IT2	1.57378	8	5.8958
Trial 1	1.3	Rep	M	0:06:24.370-0:06:24.636	IT2	1.07627	8	4.032
Trial 1	1.3	Rep	M	0:06:24.636-0:06:24.902	IT2	2.14142	8	8.0223
Trial 1	1.3	Rep	M	0:06:24.902-0:06:25.168	IT2	1.99295	8	7.46608
Trial 1	1.3	Rep	M	0:06:25.168-0:06:25.434	IT2	0.615362	8	2.30531
Trial 1	1.3	Rep	M	0:06:25.434-0:06:25.700	IT2	0.890582	8	3.33634
Trial 1	1.3	Rep	M	0:06:25.700-0:06:25.966	IT2	0.519439	8	1.94595
Trial 1	1.3	Rep	M	0:06:25.966-0:06:26.232	IT2	0.446827	8	1.67393
Trial 1	1.3	Rep	M	0:06:26.232-0:06:26.498	IT2	0.758533	8	2.84165
Trial 1	1.3	Rep	M	0:06:26.498-0:06:26.764	IT2	1.71991	8	6.44322
Trial 1	1.3	Rep	M	0:06:26.764-0:06:27.030	IT2	0.948811	8	3.55447
Trial 1	1.3	Rep	M	0:06:27.030-0:06:27.296	IT2	0.435782	8	1.63255
Trial 1	1.3	Rep	M	0:06:27.296-0:06:27.562	IT2	0.756874	8	2.83544
Trial 1	1.3	Rep	M	0:06:27.562-0:06:27.828	IT2	0.856057	8	3.207
Trial 1	1.3	Rep	M	0:06:27.828-0:06:28.094	IT2	0.593455	8	2.22324
Trial 1	1.3	Rep	M	0:06:28.094-0:06:28.360	IT2	0.715175	8	2.67921
Trial 1	1.3	Rep	M	0:06:28.360-0:06:28.626	IT2	0.382812	8	1.43411
Trial 1	1.3	Rep	M	0:06:28.626-0:06:28.892	IT2	0.440033	8	1.64847
Trial 1	1.3	Rep	M	0:06:28.892-0:06:29.158	IT2	0.434852	8	1.62906
Trial 1	1.3	Rep	M	0:06:29.158-0:06:29.424	IT2	1.38987	8	5.2068
Trial 1	1.3	Rep	M	0:06:29.424-0:06:29.690	IT2	2.51443	8	9.41968
Trial 1	1.3	Rep	M	0:06:29.690-0:06:29.956	IT2	2.01268	7	8.61713
Trial 1	1.3	Rep	M	0:06:29.956-0:06:30.222	IT2	1.43882	8	5.39019
Trial 1	1.3	Rep	M	0:06:30.222-0:06:30.488	IT2	2.37938	8	8.91372
Trial 1	1.3	Rep	M	0:06:30.488-0:06:30.754	IT2	0.962553	8	3.60596
Trial 1	1.3	Rep	M	0:06:30.754-0:06:31.020	IT2	0.817638	8	3.06308
Trial 1	1.3	Rep	M	0:06:31.020-0:06:31.286	IT2	0.453603	8	1.69931
Trial 1	1.3	Rep	M	0:06:31.286-0:06:31.552	IT2	0.671263	8	2.51473
Trial 1	1.3	Rep	M	0:06:31.552-0:06:31.818	IT2	0.816826	8	3.06003
Trial 1	1.3	Rep	M	0:06:31.818-0:06:32.084	IT2	2.27203	8	8.51158
Trial 1	1.3	Rep	M	0:06:32.084-0:06:32.350	IT2	3.90481	8	14.6284
Trial 1	1.3	Rep	M	0:06:32.350-0:06:32.616	IT2	2.75449	8	10.319
Trial 1	1.3	Rep	M	0:06:32.616-0:06:32.882	IT2	3.34131	8	12.5174
Trial 1	1.3	Rep	M	0:06:32.882-0:06:33.148	IT2	1.9042	8	7.13361
Trial 1	1.3	Rep	M	0:06:33.148-0:06:33.414	IT2	3.11568	8	11.6721
Trial 1	1.3	Rep	M	0:06:33.414-0:06:33.680	IT2	2.52199	8	9.44801
Trial 1	1.3	Rep	M	0:06:33.680-0:06:33.946	IT2	0.63302	8	2.37145
Trial 1	1.3	Rep	M	0:06:33.946-0:06:34.212	IT2	0.285319	8	1.06888
Trial 1	1.3	Rep	M	0:06:34.212-0:06:34.478	IT2	0.281787	8	1.05565
Trial 1	1.3	Rep	M	0:06:34.478-0:06:34.744	IT2	0.609065	8	2.2817
Trial 1	1.3	Rep	M	0:06:34.744-0:06:35.010	IT2	1.10719	8	4.14785
Trial 1	1.3	Rep	M	0:06:35.010-0:06:35.276	IT2	0.335121	8	1.25545
Trial 1	1.3	Rep	M	0:06:35.276-0:06:35.542	IT2	0.195548	8	0.732573
Trial 1	1.3	Rep	M	0:06:35.542-0:06:35.808	IT2	0.209198	8	0.783707
Trial 1	1.3	Rep	M	0:06:35.808-0:06:36.074	IT2	0.0889917	8	0.333386
Trial 1	1.3	Rep	M	0:06:36.074-0:06:36.340	IT2	0.159547	8	0.597708
Trial 1	1.3	Rep	M	0:06:36.340-0:06:36.606	IT2	0.76683	8	2.87274
Trial 1	1.3	Rep	M	0:06:36.606-0:06:36.872	IT2	0.453293	8	1.69816
Trial 1	1.3	Rep	M	0:06:36.872-0:06:37.138	IT2	1.2325	8	4.61724
Trial 1	1.3	Rep	M	0:06:37.138-0:06:37.404	IT2	0.571629	8	2.14146
Trial 1	1.3	Rep	M	0:06:37.404-0:06:37.670	IT2	0.37096	8	1.38971
Trial 1	1.3	Rep	M	0:06:37.670-0:06:37.936	IT2	0.47317	8	1.77261
Trial 1	1.3	Rep	M	0:06:37.936-0:06:38.202	IT2	0.278458	8	1.04318
Trial 1	1.3	Rep	M	0:06:38.202-0:06:38.468	IT2	0.730183	8	2.73545
Trial 1	1.3	Rep	M	0:06:38.468-0:06:38.734	IT2	0.689765	8	2.58403
Trial 1	1.3	Rep	M	0:06:38.734-0:06:39.000	IT2	0.298401	8	1.11789
Trial 1	1.3	Rep	M	0:06:39.000-0:06:39.266	IT2	0.130104	8	0.487402
Trial 1	1.3	Rep	M	0:06:39.266-0:06:39.532	IT2	0.30148	7	1.29076
Trial 1	1.3	Rep	M	0:06:39.532-0:06:39.798	IT2	0.0887474	8	0.332471
Trial 1	1.3	Rep	M	0:06:39.798-0:06:40.064	IT2	0.169857	8	0.636326
Trial 1	1.3	Rep	M	0:06:40.064-0:06:40.330	IT2	0.192934	8	0.722781
Trial 1	1.3	Rep	M	0:06:40.330-0:06:40.596	IT2	0.382466	8	1.43282
Trial 1	1.3	Rep	M	0:06:40.596-0:06:40.862	IT2	0.30681	8	1.14938
Trial 1	1.3	Rep	M	0:06:40.862-0:06:41.128	IT2	0.102856	8	0.385326
Trial 1	1.3	Rep	M	0:06:41.128-0:06:41.394	IT2	0.527189	8	1.97498
Trial 1	1.3	Rep	M	0:06:41.394-0:06:41.660	IT2	0.278745	8	1.04425
Trial 1	1.3	Rep	M	0:06:41.660-0:06:41.926	IT2	0.426597	8	1.59814
Trial 1	1.3	Rep	M	0:06:41.926-0:06:42.192	IT2	0.361926	8	1.35586
Trial 1	1.3	Rep	M	0:06:42.192-0:06:42.458	IT2	0.422811	8	1.58395
Trial 1	1.3	Rep	M	0:06:42.458-0:06:42.724	IT2	0.204684	8	0.766796
Trial 1	1.3	Rep	M	0:06:42.724-0:06:42.990	IT2	0.166864	8	0.625111
Trial 1	1.3	Rep	M	0:06:42.990-0:06:43.256	IT2	0.260768	8	0.976901
Trial 1	1.3	Rep	M	0:06:43.256-0:06:43.522	IT2	0.0451584	8	0.169174
Trial 1	1.3	Rep	M	0:06:43.522-0:06:43.788	IT2	0.297879	8	1.11592
Trial 1	1.3	Rep	M	0:06:43.788-0:06:44.054	IT2	0.43425	8	1.6268
Trial 1	1.3	Rep	M	0:06:44.054-0:06:44.320	IT2	0.739739	8	2.77127
Trial 1	1.3	Rep	M	0:06:44.320-0:06:44.586	IT2	1.36528	8	5.11468
Trial 1	1.3	Rep	M	0:06:44.586-0:06:44.852	IT2	0.524307	8	1.96418
Trial 1	1.3	Rep	M	0:06:44.852-0:06:45.118	IT2	0.162759	8	0.609735
Trial 1	1.3	Rep	M	0:06:45.118-0:06:45.384	IT2	1.11664	8	4.1832
Trial 1	1.3	Rep	M	0:06:45.384-0:06:45.650	IT2	3.05162	8	11.4321
Trial 1	1.3	Rep	M	0:06:45.650-0:06:45.916	IT2	4.0429	8	15.1457
Trial 1	1.3	Rep	M	0:06:45.916-0:06:46.182	IT2	3.56511	8	13.3558
Trial 1	1.3	Rep	M	0:06:46.182-0:06:46.448	IT2	3.17587	8	11.8976
Trial 1	1.3	Rep	M	0:06:46.448-0:06:46.714	IT2	3.16088	8	11.8414
Trial 1	1.3	Rep	M	0:06:46.714-0:06:46.980	IT2	1.3711	8	5.13648
Trial 1	1.3	Rep	M	0:06:46.980-0:06:47.246	IT2	0.340731	8	1.27646
Trial 1	1.3	Rep	M	0:06:47.246-0:06:47.512	IT2	0.41967	8	1.5722
Trial 1	1.3	Rep	M	0:06:47.512-0:06:47.778	IT2	0.200595	8	0.751482
Trial 1	1.3	Rep	M	0:06:47.778-0:06:48.044	IT2	0.308626	8	1.15618
Trial 1	1.3	Rep	M	0:06:48.044-0:06:48.310	IT2	0.256905	8	0.962432
Trial 1	1.3	Rep	M	0:06:48.310-0:06:48.576	IT2	0.834857	8	3.12758
Trial 1	1.3	Rep	M	0:06:48.576-0:06:48.842	IT2	0.34289	7	1.46805
Trial 1	1.3	Rep	M	0:06:48.842-0:06:49.108	IT2	0.315922	8	1.18352
Trial 1	1.3	Rep	M	0:06:49.108-0:06:49.374	IT2	0.238703	8	0.894245
Trial 1	1.3	Rep	M	0:06:49.374-0:06:49.640	IT2	0.207244	8	0.776385
Trial 1	1.3	Rep	M	0:06:49.640-0:06:49.906	IT2	0.29187	8	1.09342
Trial 1	1.3	Rep	M	0:06:49.906-0:06:50.172	IT2	0.181892	8	0.681417
Trial 1	1.3	Rep	M	0:06:50.172-0:06:50.438	IT2	0.697349	8	2.61246
Trial 1	1.3	Rep	M	0:06:50.438-0:06:50.704	IT2	0.527647	8	1.9767
Trial 1	1.3	Rep	M	0:06:50.704-0:06:50.970	IT2	0.360937	8	1.35216
Trial 1	1.3	Rep	M	0:06:50.970-0:06:51.236	IT2	0.343154	8	1.28554
Trial 1	1.3	Rep	M	0:06:51.236-0:06:51.502	IT2	0.408949	8	1.53202
Trial 1	1.3	Rep	M	0:06:51.502-0:06:51.768	IT2	0.125238	8	0.469171
Trial 1	1.3	Rep	M	0:06:51.768-0:06:52.034	IT2	0.157472	8	0.58993
Trial 1	1.3	Rep	M	0:06:52.034-0:06:52.300	IT2	0.214355	8	0.803026
Trial 1	1.3	Rep	M	0:06:52.300-0:06:52.566	IT2	0.359646	8	1.34734
Trial 1	1.3	Rep	M	0:06:52.566-0:06:52.832	IT2	0.409582	8	1.53439
Trial 1	1.3	Rep	M	0:06:52.832-0:06:53.098	IT2	0.0953755	8	0.357301
Trial 1	1.3	Rep	M	0:06:53.098-0:06:53.364	IT2	0.149781	8	0.561121
Trial 1	1.3	Rep	M	0:06:53.364-0:06:53.630	IT2	0.0407499	8	0.152659
Trial 1	1.3	Rep	M	0:06:53.630-0:06:53.896	IT2	0.304165	8	1.13948
Trial 1	1.3	Rep	M	0:06:53.896-0:06:54.162	IT2	0.199938	8	0.749017
Trial 1	1.3	Rep	M	0:06:54.162-0:06:54.428	IT2	0.219959	8	0.824019
Trial 1	1.3	Rep	M	0:06:54.428-0:06:54.694	IT2	0.286945	8	1.07497
Trial 1	1.3	Rep	M	0:06:54.694-0:06:54.960	IT2	0.251779	8	0.943224
Trial 1	1.3	Rep	M	0:06:54.960-0:06:55.226	IT2	0.613659	8	2.29891
Trial 1	1.3	Rep	M	0:06:55.226-0:06:55.492	IT2	0.412628	8	1.54581
Trial 1	1.3	Rep	M	0:06:55.492-0:06:55.758	IT2	0.522658	8	1.95801
Trial 1	1.3	Rep	M	0:06:55.758-0:06:56.024	IT2	0.426039	8	1.59605
Trial 1	1.3	Rep	M	0:06:56.024-0:06:56.290	IT2	0.40119	8	1.50295
Trial 1	1.3	Rep	M	0:06:56.290-0:06:56.556	IT2	0.324405	8	1.21531
Trial 1	1.3	Rep	M	0:06:56.556-0:06:56.822	IT2	0.165061	8	0.618356
Trial 1	1.3	Rep	M	0:06:56.822-0:06:57.088	IT2	0.438705	8	1.64349
Trial 1	1.3	Rep	M	0:06:57.088-0:06:57.354	IT2	0.504017	8	1.88817
Trial 1	1.3	Rep	M	0:06:57.354-0:06:57.620	IT2	0.147681	8	0.553248
Trial 1	1.3	Rep	M	0:06:57.620-0:06:57.886	IT2	0.0357431	8	0.133902
Trial 1	1.3	Rep	M	0:06:57.886-0:06:58.152	IT2	0.171437	8	0.642243
Trial 1	1.3	Rep	M	0:06:58.152-0:06:58.418	IT2	0.135308	7	0.579311
Trial 1	1.3	Rep	M	0:06:58.418-0:06:58.684	IT2	0.251268	8	0.941314
Trial 1	1.3	Rep	M	0:06:58.684-0:06:58.950	IT2	0.128458	8	0.481235
Trial 1	1.3	Rep	M	0:06:58.950-0:06:59.216	IT2	0.0699558	8	0.262071
Trial 1	1.3	Rep	M	0:06:59.216-0:06:59.482	IT2	0.13315	8	0.498813
Trial 1	1.3	Rep	M	0:06:59.482-0:06:59.748	IT2	0.130666	8	0.489507
Trial 1	1.3	Rep	M	0:06:59.748-0:07:00.014	IT2	0.252969	8	0.947684
Trial 1	1.3	Rep	M	0:07:00.014-0:07:00.280	IT2	0.191368	8	0.716913
Trial 1	1.3	Rep	M	0:07:00.280-0:07:00.546	IT2	0.225849	8	0.846087
Trial 1	1.3	Rep	M	0:07:00.546-0:07:00.812	IT2	0.14993	8	0.561679
Trial 1	1.3	Rep	M	0:07:00.812-0:07:01.078	IT2	0.117275	8	0.439339
Trial 1	1.3	Rep	M	0:07:01.078-0:07:01.344	IT2	0.165348	8	0.619437
Trial 1	1.3	Rep	M	0:07:01.344-0:07:01.610	IT2	0.141349	8	0.529527
Trial 1	1.3	Rep	M	0:07:01.610-0:07:01.876	IT2	0.138249	8	0.517915
Trial 1	1.3	Rep	M	0:07:01.876-0:07:02.142	IT2	0.155886	8	0.58399
Trial 1	1.3	Rep	M	0:07:02.142-0:07:02.408	IT2	0.149237	8	0.55908
Trial 1	1.3	Rep	M	0:07:02.408-0:07:02.674	IT2	0.313398	8	1.17407
Trial 1	1.3	Rep	M	0:07:02.674-0:07:02.940	IT2	0.33115	8	1.24056
Trial 1	1.3	Rep	M	0:07:02.940-0:07:03.206	IT2	0.0949727	8	0.35579
Trial 1	1.3	Rep	M	0:07:03.206-0:07:03.472	IT2	0.0619678	8	0.232146
Trial 1	1.3	Rep	M	0:07:03.472-0:07:03.738	IT2	0.102348	8	0.38342
Trial 1	1.3	Rep	M	0:07:03.738-0:07:04.004	IT2	0.199968	8	0.749132
Trial 1	1.3	Rep	M	0:07:04.004-0:07:04.270	IT2	0.274396	8	1.02795
Trial 1	1.3	Rep	M	0:07:04.270-0:07:04.536	IT2	0.381011	8	1.42736
Trial 1	1.3	Rep	M	0:07:04.536-0:07:04.802	IT2	0.87295	8	3.27029
Trial 1	1.3	Rep	M	0:07:04.802-0:07:05.068	IT2	0.34616	8	1.2968
Trial 1	1.3	Rep	M	0:07:05.068-0:07:05.334	IT2	0.339685	8	1.27255
Trial 1	1.3	Rep	M	0:07:05.334-0:07:05.600	IT2	0.378779	8	1.419
Trial 1	1.3	Rep	M	0:07:05.600-0:07:05.866	IT2	0.490045	8	1.83582
Trial 1	1.3	Rep	M	0:07:05.866-0:07:06.132	IT2	0.365527	8	1.36937
Trial 1	1.3	Rep	M	0:07:06.132-0:07:06.398	IT2	0.381215	8	1.42813
Trial 1	1.3	Rep	M	0:07:06.398-0:07:06.664	IT2	0.191831	8	0.71865
Trial 1	1.3	Rep	M	0:07:06.664-0:07:06.930	IT2	0.108788	8	0.407545
Trial 1	1.3	Rep	M	0:07:06.930-0:07:07.196	IT2	0.097938	8	0.3669
Trial 1	1.3	Rep	M	0:07:07.196-0:07:07.462	IT2	0.0467168	8	0.175013
Trial 1	1.3	Rep	M	0:07:07.462-0:07:07.728	IT2	0.115346	8	0.432112
Trial 1	1.3	Rep	M	0:07:07.728-0:07:07.994	IT2	0.119356	7	0.511014
Trial 1	1.3	Rep	M	0:07:07.994-0:07:08.260	IT2	0.147463	8	0.552434
Trial 1	1.3	Rep	M	0:07:08.260-0:07:08.526	IT2	0.0918863	8	0.344231
Trial 1	1.3	Rep	M	0:07:08.526-0:07:08.792	IT2	0.0598769	8	0.224313
Trial 1	1.3	Rep	M	0:07:08.792-0:07:09.058	IT2	0.149992	8	0.561909
Trial 1	1.3	Rep	M	0:07:09.058-0:07:09.324	IT2	0.205247	8	0.768905
Trial 1	1.3	Rep	M	0:07:09.324-0:07:09.590	IT2	0.175901	8	0.658968
Trial 1	1.3	Rep	M	0:07:09.590-0:07:09.856	IT2	0.0910021	8	0.340915
Trial 1	1.3	Rep	M	0:07:09.856-0:07:10.122	IT2	0.0938102	8	0.351434
Trial 1	1.3	Rep	M	0:07:10.122-0:07:10.388	IT2	0.0633337	8	0.237264
Trial 1	1.3	Rep	M	0:07:10.388-0:07:10.654	IT2	0.119222	8	0.446632
Trial 1	1.3	Rep	M	0:07:10.654-0:07:10.920	IT2	0.0934467	8	0.350077
Trial 1	1.3	Rep	M	0:07:10.920-0:07:11.186	IT2	0.0607235	8	0.227486
Trial 1	1.3	Rep	M	0:07:11.186-0:07:11.452	IT2	0.105695	8	0.395956
Trial 1	1.3	Rep	M	0:07:11.452-0:07:11.718	IT2	0.0547794	8	0.205217
Trial 1	1.3	Rep	M	0:07:11.718-0:07:11.984	IT2	0.0812186	8	0.304263
Trial 1	1.3	Rep	M	0:07:11.984-0:07:12.250	IT2	0.0871512	8	0.326489
Trial 1	1.3	Rep	M	0:07:12.250-0:07:12.516	IT2	0.0659816	8	0.247182
Trial 1	1.3	Rep	M	0:07:12.516-0:07:12.782	IT2	0.104605	8	0.391876
Trial 1	1.3	Rep	M	0:07:12.782-0:07:13.048	IT2	0.0642426	8	0.240669
Trial 1	1.3	Rep	M	0:07:13.048-0:07:13.314	IT2	0.0917349	8	0.343662
Trial 1	1.3	Rep	M	0:07:13.314-0:07:13.580	IT2	0.114869	8	0.43033
Trial 1	1.3	Rep	M	0:07:13.580-0:07:13.846	IT2	0.100906	8	0.37802
Trial 1	1.3	Rep	M	0:07:13.846-0:07:14.112	IT2	0.0900747	8	0.337442
Trial 1	1.3	Rep	M	0:07:14.112-0:07:14.378	IT2	0.17119	8	0.641325
Trial 1	1.3	Rep	M	0:07:14.378-0:07:14.644	IT2	0.110441	8	0.413739
Trial 1	1.3	Rep	M	0:07:14.644-0:07:14.910	IT2	0.0676967	8	0.253608
Trial 1	1.3	Rep	M	0:07:14.910-0:07:15.176	IT2	0.0448743	8	0.16811
Trial 1	1.3	Rep	M	0:07:15.176-0:07:15.442	IT2	0.106461	8	0.398826
Trial 1	1.3	Rep	M	0:07:15.442-0:07:15.708	IT2	0.347996	8	1.30368
Trial 1	1.3	Rep	M	0:07:15.708-0:07:15.974	IT2	0.202014	8	0.756795
Trial 1	1.3	Rep	M	0:07:15.974-0:07:16.240	IT2	0.160794	8	0.602374
Trial 1	1.3	Rep	M	0:07:16.240-0:07:16.506	IT2	0.182161	8	0.682422
Trial 1	1.3	Rep	M	0:07:16.506-0:07:16.772	IT2	0.672497	8	2.51933
Trial 1	1.3	Rep	M	0:07:16.772-0:07:17.038	IT2	0.412929	8	1.54694
Trial 1	1.3	Rep	M	0:07:17.038-0:07:17.304	IT2	0.268093	8	1.00434
Trial 1	1.3	Rep	M	0:07:17.304-0:07:17.570	IT2	0.326312	7	1.39707
Trial 1	1.3	Rep	M	0:07:17.570-0:07:17.836	IT2	0.611996	8	2.29269
Trial 1	1.3	Rep	M	0:07:17.836-0:07:18.102	IT2	1.00496	8	3.76479
Trial 1	1.3	Rep	M	0:07:18.102-0:07:18.368	IT2	0.246729	8	0.924306
Trial 1	1.3	Rep	M	0:07:18.368-0:07:18.634	IT2	0.154489	8	0.578751
Trial 1	1.3	Rep	M	0:07:18.634-0:07:18.900	IT2	0.157275	8	0.589192
Trial 1	1.3	Rep	M	0:07:18.900-0:07:19.166	IT2	0.112153	8	0.420153
Trial 1	1.3	Rep	M	0:07:19.166-0:07:19.432	IT2	0.0743149	8	0.278401
Trial 1	1.3	Rep	M	0:07:19.432-0:07:19.698	IT2	0.136728	8	0.512216
Trial 1	1.3	Rep	M	0:07:19.698-0:07:19.964	IT2	0.156299	8	0.585535
Trial 1	1.3	Rep	M	0:07:19.964-0:07:20.230	IT2	0.0937104	8	0.351062
Trial 1	1.3	Rep	M	0:07:20.230-0:07:20.496	IT2	0.107205	8	0.401621
Trial 1	1.3	Rep	M	0:07:20.496-0:07:20.762	IT2	0.0829236	8	0.310654
Trial 1	1.3	Rep	M	0:07:20.762-0:07:21.028	IT2	0.0795999	8	0.2982
Trial 1	1.3	Rep	M	0:07:21.028-0:07:21.294	IT2	0.0571993	8	0.214282
Trial 1	1.3	Rep	M	0:07:21.294-0:07:21.560	IT2	0.118727	8	0.444778
Trial 1	1.3	Rep	M	0:07:21.560-0:07:21.826	IT2	0.0963518	8	0.360957
Trial 1	1.3	Rep	M	0:07:21.826-0:07:22.092	IT2	0.178371	8	0.66822
Trial 1	1.3	Rep	M	0:07:22.092-0:07:22.358	IT2	0.152172	8	0.570075
Trial 1	1.3	Rep	M	0:07:22.358-0:07:22.624	IT2	0.167749	8	0.628429
Trial 1	1.3	Rep	M	0:07:22.624-0:07:22.890	IT2	0.158853	8	0.595103
Trial 1	1.3	Rep	M	0:07:22.890-0:07:23.156	IT2	0.165313	8	0.619306
Trial 1	1.3	Rep	M	0:07:23.156-0:07:23.422	IT2	0.299062	8	1.12036
Trial 1	1.3	Rep	M	0:07:23.422-0:07:23.688	IT2	0.144798	8	0.542451
Trial 1	1.3	Rep	M	0:07:23.688-0:07:23.954	IT2	0.0696415	8	0.260893
Trial 1	1.3	Rep	M	0:07:23.954-0:07:24.220	IT2	0.153904	8	0.576557
Trial 1	1.3	Rep	M	0:07:24.220-0:07:24.486	IT2	0.186688	8	0.699381
Trial 1	1.3	Rep	M	0:07:24.486-0:07:24.752	IT2	0.167605	8	0.627889
Trial 1	1.3	Rep	M	0:07:24.752-0:07:25.018	IT2	0.116525	8	0.436534
Trial 1	1.3	Rep	M	0:07:25.018-0:07:25.284	IT2	0.161794	8	0.606121
Trial 1	1.3	Rep	M	0:07:25.284-0:07:25.550	IT2	0.111354	8	0.41716
Trial 1	1.3	Rep	M	0:07:25.550-0:07:25.816	IT2	0.135572	8	0.507886
Trial 1	1.3	Rep	M	0:07:25.816-0:07:26.082	IT2	0.143757	8	0.538547
Trial 1	1.3	Rep	M	0:07:26.082-0:07:26.348	IT2	0.475848	8	1.78265
Trial 1	1.3	Rep	M	0:07:26.348-0:07:26.614	IT2	0.477007	8	1.78698
Trial 1	1.3	Rep	M	0:07:26.614-0:07:26.880	IT2	0.340086	7	1.45605
Trial 1	1.3	Rep	M	0:07:26.880-0:07:27.146	IT2	0.271925	8	1.0187
Trial 1	1.3	Rep	M	0:07:27.146-0:07:27.412	IT2	0.26551	8	0.994669
Trial 1	1.3	Rep	M	0:07:27.412-0:07:27.678	IT2	0.153101	8	0.573551
Trial 1	1.3	Rep	M	0:07:27.678-0:07:27.944	IT2	0.106327	8	0.398326
Trial 1	1.3	Rep	M	0:07:27.944-0:07:28.210	IT2	0.0970233	8	0.363472
Trial 1	1.3	Rep	M	0:07:28.210-0:07:28.476	IT2	0.0515313	8	0.193049
Trial 1	1.3	Rep	M	0:07:28.476-0:07:28.742	IT2	0.377389	8	1.41379
Trial 1	1.3	Rep	M	0:07:28.742-0:07:29.008	IT2	0.515185	8	1.93002
Trial 1	1.3	Rep	M	0:07:29.008-0:07:29.274	IT2	0.336926	8	1.26222
Trial 1	1.3	Rep	M	0:07:29.274-0:07:29.540	IT2	0.629696	8	2.35899
Trial 1	1.3	Rep	M	0:07:29.540-0:07:29.806	IT2	0.186005	8	0.696819
Trial 1	1.3	Rep	M	0:07:29.806-0:07:30.072	IT2	0.13244	8	0.496154
Trial 1	1.3	Rep	M	0:07:30.072-0:07:30.338	IT2	0.0677447	8	0.253789
Trial 1	1.3	Rep	M	0:07:30.338-0:07:30.604	IT2	0.130422	8	0.488592
Trial 1	1.3	Rep	M	0:07:30.604-0:07:30.870	IT2	0.0544512	8	0.203987
Trial 1	1.3	Rep	M	0:07:30.870-0:07:31.136	IT2	0.0853616	8	0.319784
Trial 1	1.3	Rep	M	0:07:31.136-0:07:31.402	IT2	0.0538253	8	0.201645
Trial 1	1.3	Rep	M	0:07:31.402-0:07:31.668	IT2	0.0828058	8	0.310209
Trial 1	1.3	Rep	M	0:07:31.668-0:07:31.934	IT2	0.0938885	8	0.351732
Trial 1	1.3	Rep	M	0:07:31.934-0:07:32.200	IT2	0.0198846	8	0.0744927
Trial 1	1.3	Rep	M	0:07:32.200-0:07:32.466	IT2	0.0587258	8	0.220001
Trial 1	1.3	Rep	M	0:07:32.466-0:07:32.732	IT2	0.0238194	8	0.089234
Trial 1	1.3	Rep	M	0:07:32.732-0:07:32.998	IT2	0.0480084	8	0.179852
Trial 1	1.3	Rep	M	0:07:32.998-0:07:33.264	IT2	0.0245335	8	0.0919086
Trial 1	1.3	Rep	M	0:07:33.264-0:07:33.530	IT2	0.0860517	8	0.322369
Trial 1	1.3	Rep	M	0:07:33.530-0:07:33.796	IT2	0.085997	8	0.322166
Trial 1	1.3	Rep	M	0:07:33.796-0:07:34.062	IT2	0.0599965	8	0.224763
Trial 1	1.3	Rep	M	0:07:34.062-0:07:34.328	IT2	0.0719364	8	0.26949
Trial 1	1.3	Rep	M	0:07:34.328-0:07:34.594	IT2	0.031051	8	0.116324
Trial 1	1.3	Rep	M	0:07:34.594-0:07:34.860	IT2	0.16741	8	0.627159
Trial 1	1.3	Rep	M	0:07:34.860-0:07:35.126	IT2	0.0640905	8	0.240099
Trial 1	1.3	Rep	M	0:07:35.126-0:07:35.392	IT2	0.400402	8	1.50001
Trial 1	1.3	Rep	M	0:07:35.392-0:07:35.658	IT2	0.682309	8	2.55609
Trial 1	1.3	Rep	M	0:07:35.658-0:07:35.924	IT2	0.294506	8	1.10329
Trial 1	1.3	Rep	M	0:07:35.924-0:07:36.190	IT2	0.0911533	8	0.341484
Trial 1	1.3	Rep	M	0:07:36.190-0:07:36.456	IT2	0.256813	7	1.09953
Trial 1	1.3	Rep	M	0:07:36.456-0:07:36.722	IT2	0.162546	8	0.608936
Trial 1	1.3	Rep	M	0:07:36.722-0:07:36.988	IT2	0.0815622	8	0.305551
Trial 1	1.3	Rep	M	0:07:36.988-0:07:37.254	IT2	0.0690173	8	0.258555
Trial 1	1.3	Rep	M	0:07:37.254-0:07:37.520	IT2	0.239527	8	0.897325
Trial 1	1.3	Rep	M	0:07:37.520-0:07:37.786	IT2	0.375582	8	1.40702
Trial 1	1.3	Rep	M	0:07:37.786-0:07:38.052	IT2	0.183881	8	0.688864
Trial 1	1.3	Rep	M	0:07:38.052-0:07:38.318	IT2	0.537423	8	2.01332
Trial 1	1.3	Rep	M	0:07:38.318-0:07:38.584	IT2	1.88033	8	7.04418
Trial 1	1.3	Rep	M	0:07:38.584-0:07:38.850	IT2	0.841354	8	3.15194
Trial 1	1.3	Rep	M	0:07:38.850-0:07:39.116	IT2	0.296774	8	1.11178
Trial 1	1.3	Rep	M	0:07:39.116-0:07:39.382	IT2	0.965002	8	3.61514
Trial 1	1.3	Rep	M	0:07:39.382-0:07:39.648	IT2	0.62944	8	2.35803
Trial 1	1.3	Rep	M	0:07:39.648-0:07:39.914	IT2	0.247762	8	0.928177
Trial 1	1.3	Rep	M	0:07:39.914-0:07:40.180	IT2	0.509504	8	1.90874
Trial 1	1.3	Rep	M	0:07:40.180-0:07:40.446	IT2	0.974113	8	3.64927
Trial 1	1.3	Rep	M	0:07:40.446-0:07:40.712	IT2	0.728978	8	2.73095
Trial 1	1.3	Rep	M	0:07:40.712-0:07:40.978	IT2	1.03276	8	3.86896
Trial 1	1.3	Rep	M	0:07:40.978-0:07:41.244	IT2	0.388638	8	1.45593
Trial 1	1.3	Rep	M	0:07:41.244-0:07:41.510	IT2	0.278739	8	1.04423
Trial 1	1.3	Rep	M	0:07:41.510-0:07:41.776	IT2	0.2372	8	0.888606
Trial 1	1.3	Rep	M	0:07:41.776-0:07:42.042	IT2	0.37103	8	1.38997
Trial 1	1.3	Rep	M	0:07:42.042-0:07:42.308	IT2	0.354872	8	1.32944
Trial 1	1.3	Rep	M	0:07:42.308-0:07:42.574	IT2	0.528053	8	1.97821
Trial 1	1.3	Rep	M	0:07:42.574-0:07:42.840	IT2	0.484105	8	1.81358
Trial 1	1.3	Rep	M	0:07:42.840-0:07:43.106	IT2	0.662404	8	2.48153
Trial 1	1.3	Rep	M	0:07:43.106-0:07:43.372	IT2	1.69054	8	6.33322
Trial 1	1.3	Rep	M	0:07:43.372-0:07:43.638	IT2	3.1805	8	11.9149
Trial 1	1.3	Rep	M	0:07:43.638-0:07:43.904	IT2	1.01198	8	3.79111
Trial 1	1.3	Rep	M	0:07:43.904-0:07:44.170	IT2	0.385068	8	1.44256
Trial 1	1.3	Rep	M	0:07:44.170-0:07:44.436	IT2	0.71974	8	2.69633
Trial 1	1.3	Rep	M	0:07:44.436-0:07:44.702	IT2	0.303352	8	1.13644
Trial 1	1.3	Rep	M	0:07:44.702-0:07:44.968	IT2	0.228732	8	0.856889
Trial 1	1.3	Rep	M	0:07:44.968-0:07:45.234	IT2	0.226625	8	0.848992
Trial 1	1.3	Rep	M	0:07:45.234-0:07:45.500	IT2	0.182954	8	0.68539
Trial 1	1.3	Rep	M	0:07:45.500-0:07:45.766	IT2	0.116335	8	0.435819
Trial 1	1.3	Rep	M	0:07:45.766-0:07:46.032	IT2	0.143028	7	0.61236
Trial 1	1.3	Rep	M	0:07:46.032-0:07:46.298	IT2	0.0574801	8	0.215336
Trial 1	1.3	Rep	M	0:07:46.298-0:07:46.564	IT2	0.0540725	8	0.20257
Trial 1	1.3	Rep	M	0:07:46.564-0:07:46.830	IT2	0.0681803	8	0.255419
Trial 1	1.3	Rep	M	0:07:46.830-0:07:47.096	IT2	0.0386373	8	0.144745
Trial 1	1.3	Rep	M	0:07:47.096-0:07:47.362	IT2	0.0648058	8	0.24278
Trial 1	1.3	Rep	M	0:07:47.362-0:07:47.628	IT2	0.0456068	8	0.170854
Trial 1	1.3	Rep	M	0:07:47.628-0:07:47.894	IT2	0.0280791	8	0.105191
Trial 1	1.3	Rep	M	0:07:47.894-0:07:48.160	IT2	0.0368815	8	0.138167
Trial 1	1.3	Rep	M	0:07:48.160-0:07:48.426	IT2	0.0365751	8	0.13702
Trial 1	1.3	Rep	M	0:07:48.426-0:07:48.692	IT2	0.058642	8	0.219686
Trial 1	1.3	Rep	M	0:07:48.692-0:07:48.958	IT2	0.0366129	8	0.137162
Trial 1	1.3	Rep	M	0:07:48.958-0:07:49.224	IT2	0.180375	8	0.675728
Trial 1	1.3	Rep	M	0:07:49.224-0:07:49.490	IT2	0.111425	8	0.417427
Trial 1	1.3	Rep	M	0:07:49.490-0:07:49.756	IT2	0.140563	8	0.526587
Trial 1	1.3	Rep	M	0:07:49.756-0:07:50.022	IT2	0.0657235	8	0.246217
Trial 1	1.3	Rep	M	0:07:50.022-0:07:50.288	IT2	0.0450701	8	0.168845
Trial 1	1.3	Rep	M	0:07:50.288-0:07:50.554	IT2	0.0973074	8	0.364537
Trial 1	1.3	Rep	M	0:07:50.554-0:07:50.820	IT2	0.0399681	8	0.149731
Trial 1	1.3	Rep	M	0:07:50.820-0:07:51.086	IT2	0.136453	8	0.511185
Trial 1	1.3	Rep	M	0:07:51.086-0:07:51.352	IT2	0.0653964	8	0.24499
Trial 1	1.3	Rep	M	0:07:51.352-0:07:51.618	IT2	0.0884242	8	0.331257
Trial 1	1.3	Rep	M	0:07:51.618-0:07:51.884	IT2	0.019086	8	0.0715006
Trial 1	1.3	Rep	M	0:07:51.884-0:07:52.150	IT2	0.0629115	8	0.235682
Trial 1	1.3	Rep	M	0:07:52.150-0:07:52.416	IT2	0.0320215	8	0.119961
Trial 1	1.3	Rep	M	0:07:52.416-0:07:52.682	IT2	0.0441375	8	0.16535
Trial 1	1.3	Rep	M	0:07:52.682-0:07:52.948	IT2	0.0622347	8	0.233147
Trial 1	1.3	Rep	M	0:07:52.948-0:07:53.214	IT2	0.0709229	8	0.265694
Trial 1	1.3	Rep	M	0:07:53.214-0:07:53.480	IT2	0.0855505	8	0.320493
Trial 1	1.3	Rep	M	0:07:53.480-0:07:53.746	IT2	0.0380831	8	0.14267
Trial 1	1.3	Rep	M	0:07:53.746-0:07:54.012	IT2	0.0935336	8	0.3504
Trial 1	1.3	Rep	M	0:07:54.012-0:07:54.278	IT2	0.0527993	8	0.1978
Trial 1	1.3	Rep	M	0:07:54.278-0:07:54.544	IT2	0.0556974	8	0.208656
Trial 1	1.3	Rep	M	0:07:54.544-0:07:54.810	IT2	0.0246088	8	0.0921903
Trial 1	1.3	Rep	M	0:07:54.810-0:07:55.076	IT2	0.0529153	8	0.198233
Trial 1	1.3	Rep	M	0:07:55.076-0:07:55.342	IT2	0.0770973	7	0.330086
Trial 1	1.3	Rep	M	0:07:55.342-0:07:55.608	IT2	0.0625262	8	0.234238
Trial 1	1.3	Rep	M	0:07:55.608-0:07:55.874	IT2	0.0820577	8	0.307409
Trial 1	1.3	Rep	M	0:07:55.874-0:07:56.140	IT2	0.0476986	8	0.17869
Trial 1	1.3	Rep	M	0:07:56.140-0:07:56.406	IT2	0.112351	8	0.420898
Trial 1	1.3	Rep	M	0:07:56.406-0:07:56.672	IT2	0.0460591	8	0.172548
Trial 1	1.3	Rep	M	0:07:56.672-0:07:56.938	IT2	0.0903541	8	0.338487
Trial 1	1.3	Rep	M	0:07:56.938-0:07:57.204	IT2	0.0473012	8	0.177202
Trial 1	1.3	Rep	M	0:07:57.204-0:07:57.470	IT2	0.0484953	8	0.181675
Trial 1	1.3	Rep	M	0:07:57.470-0:07:57.736	IT2	0.0676249	8	0.25334
Trial 1	1.3	Rep	M	0:07:57.736-0:07:58.002	IT2	0.0411704	8	0.154234
Trial 1	1.3	Rep	M	0:07:58.002-0:07:58.268	IT2	0.0598865	8	0.224349
Trial 1	1.3	Rep	M	0:07:58.268-0:07:58.534	IT2	0.030785	8	0.115328
Trial 1	1.3	Rep	M	0:07:58.534-0:07:58.800	IT2	0.122226	8	0.457889
Trial 1	1.3	Rep	M	0:07:58.800-0:07:59.066	IT2	0.0429236	8	0.160803
Trial 1	1.3	Rep	M	0:07:59.066-0:07:59.332	IT2	0.0314147	8	0.117687
Trial 1	1.3	Rep	M	0:07:59.332-0:07:59.598	IT2	0.079652	8	0.298396
Trial 1	1.3	Rep	M	0:07:59.598-0:07:59.864	IT2	0.0256814	8	0.0962096
Trial 1	1.3	Rep	M	0:07:59.864-0:08:00.130	IT2	0.114113	8	0.427494
Trial 1	1.3	Rep	M	0:08:00.130-0:08:00.396	IT2	0.0728395	8	0.272875
Trial 1	1.3	Rep	M	0:08:00.396-0:08:00.662	IT2	0.0860336	8	0.322302
Trial 1	1.3	Rep	M	0:08:00.662-0:08:00.928	IT2	0.107573	8	0.402993
Trial 1	1.3	Rep	M	0:08:00.928-0:08:01.194	IT2	0.241583	8	0.905034
Trial 1	1.3	Rep	M	0:08:01.194-0:08:01.460	IT2	0.219432	8	0.822044
Trial 1	1.3	Rep	M	0:08:01.460-0:08:01.726	IT2	0.61078	8	2.28815
Trial 1	1.3	Rep	M	0:08:01.726-0:08:01.992	IT2	0.730602	8	2.73702
Trial 1	1.3	Rep	M	0:08:01.992-0:08:02.258	IT2	0.447498	8	1.67644
Trial 1	1.3	Rep	M	0:08:02.258-0:08:02.524	IT2	0.214959	8	0.805294
Trial 1	1.3	Rep	M	0:08:02.524-0:08:02.790	IT2	0.564528	8	2.11486
Trial 1	1.3	Rep	M	0:08:02.790-0:08:03.056	IT2	1.07875	8	4.04127
Trial 1	1.3	Rep	M	0:08:03.056-0:08:03.322	IT2	1.16194	8	4.35293
Trial 1	1.3	Rep	M	0:08:03.322-0:08:03.588	IT2	0.45746	8	1.71375
Trial 1	1.3	Rep	M	0:08:03.588-0:08:03.854	IT2	0.535935	8	2.00775
Trial 1	1.3	Rep	M	0:08:03.854-0:08:04.120	IT2	0.591312	8	2.2152
Trial 1	1.3	Rep	M	0:08:04.120-0:08:04.386	IT2	0.216175	8	0.809848
Trial 1	1.3	Rep	M	0:08:04.386-0:08:04.652	IT2	0.156959	8	0.588006
Trial 1	1.3	Rep	M	0:08:04.652-0:08:04.918	IT2	0.0936155	7	0.400806
Trial 1	1.3	Rep	M	0:08:04.918-0:08:05.184	IT2	0.0525733	8	0.196953
Trial 1	1.3	Rep	M	0:08:05.184-0:08:05.450	IT2	0.0937303	8	0.35114
Trial 1	1.3	Rep	M	0:08:05.450-0:08:05.716	IT2	0.0534291	8	0.200158
Trial 1	1.3	Rep	M	0:08:05.716-0:08:05.982	IT2	0.286426	8	1.07302
Trial 1	1.3	Rep	M	0:08:05.982-0:08:06.248	IT2	0.128007	8	0.479544
Trial 1	1.3	Rep	M	0:08:06.248-0:08:06.514	IT2	0.11334	8	0.424601
Trial 1	1.3	Rep	M	0:08:06.514-0:08:06.780	IT2	0.176725	8	0.662061
Trial 1	1.3	Rep	M	0:08:06.780-0:08:07.046	IT2	0.176784	8	0.662273
Trial 1	1.3	Rep	M	0:08:07.046-0:08:07.312	IT2	0.127661	8	0.47825
Trial 1	1.3	Rep	M	0:08:07.312-0:08:07.578	IT2	0.124526	8	0.466504
Trial 1	1.3	Rep	M	0:08:07.578-0:08:07.844	IT2	0.154442	8	0.57858
Trial 1	1.3	Rep	M	0:08:07.844-0:08:08.110	IT2	0.153285	8	0.574247
Trial 1	1.3	Rep	M	0:08:08.110-0:08:08.376	IT2	0.166369	8	0.623262
Trial 1	1.3	Rep	M	0:08:08.376-0:08:08.642	IT2	0.152509	8	0.571336
Trial 1	1.3	Rep	M	0:08:08.642-0:08:08.908	IT2	0.22241	8	0.833203
Trial 1	1.3	Rep	M	0:08:08.908-0:08:09.174	IT2	0.262742	8	0.984299
Trial 1	1.3	Rep	M	0:08:09.174-0:08:09.440	IT2	0.157598	8	0.590399
Trial 1	1.3	Rep	M	0:08:09.440-0:08:09.706	IT2	0.1031	8	0.386238
Trial 1	1.3	Rep	M	0:08:09.706-0:08:09.972	IT2	0.035716	8	0.133802
Trial 1	1.3	Rep	M	0:08:09.972-0:08:10.238	IT2	0.194243	8	0.727678
Trial 1	1.3	Rep	M	0:08:10.238-0:08:10.504	IT2	0.251963	8	0.94392
Trial 1	1.3	Rep	M	0:08:10.504-0:08:10.770	IT2	0.105727	8	0.396082
Trial 1	1.3	Rep	M	0:08:10.770-0:08:11.036	IT2	0.220342	8	0.825456
Trial 1	1.3	Rep	M	0:08:11.036-0:08:11.302	IT2	0.108706	8	0.407245
Trial 1	1.3	Rep	M	0:08:11.302-0:08:11.568	IT2	0.119851	8	0.44899
Trial 1	1.3	Rep	M	0:08:11.568-0:08:11.834	IT2	0.0461085	8	0.172734
Trial 1	1.3	Rep	M	0:08:11.834-0:08:12.100	IT2	0.0685823	8	0.256925
Trial 1	1.3	Rep	M	0:08:12.100-0:08:12.366	IT2	0.0449424	8	0.168365
Trial 1	1.3	Rep	M	0:08:12.366-0:08:12.632	IT2	0.0512369	8	0.191947
Trial 1	1.3	Rep	M	0:08:12.632-0:08:12.898	IT2	0.0692605	8	0.259468
Trial 1	1.3	Rep	M	0:08:12.898-0:08:13.164	IT2	0.0700546	8	0.26244
Trial 1	1.3	Rep	M	0:08:13.164-0:08:13.430	IT2	0.0859799	8	0.322104
Trial 1	1.3	Rep	M	0:08:13.430-0:08:13.696	IT2	0.0637929	8	0.238983
Trial 1	1.3	Rep	M	0:08:13.696-0:08:13.962	IT2	0.198828	8	0.74486
Trial 1	1.3	Rep	M	0:08:13.962-0:08:14.228	IT2	0.18194	8	0.681594
Trial 1	1.3	Rep	M	0:08:14.228-0:08:14.494	IT2	0.139445	7	0.597028
Trial 1	1.3	Rep	M	0:08:14.494-0:08:14.760	IT2	0.0720673	8	0.269982
Trial 1	1.3	Rep	M	0:08:14.760-0:08:15.026	IT2	0.0725588	8	0.271824
Trial 1	1.3	Rep	M	0:08:15.026-0:08:15.292	IT2	0.043315	8	0.162268
Trial 1	1.3	Rep	M	0:08:15.292-0:08:15.558	IT2	0.0528585	8	0.198022
Trial 1	1.3	Rep	M	0:08:15.558-0:08:15.824	IT2	0.0613908	8	0.229984
Trial 1	1.3	Rep	M	0:08:15.824-0:08:16.090	IT2	0.0368829	8	0.138173
Trial 1	1.3	Rep	M	0:08:16.090-0:08:16.356	IT2	0.105182	8	0.394039
Trial 1	1.3	Rep	M	0:08:16.356-0:08:16.622	IT2	0.0384994	8	0.144228
Trial 1	1.3	Rep	M	0:08:16.622-0:08:16.888	IT2	0.0758449	8	0.284135
Trial 1	1.3	Rep	M	0:08:16.888-0:08:17.154	IT2	0.0600424	8	0.224933
Trial 1	1.3	Rep	M	0:08:17.154-0:08:17.420	IT2	0.0826268	8	0.309542
Trial 1	1.3	Rep	M	0:08:17.420-0:08:17.686	IT2	0.0465714	8	0.174468
Trial 1	1.3	Rep	M	0:08:17.686-0:08:17.952	IT2	0.0602485	8	0.225706
Trial 1	1.3	Rep	M	0:08:17.952-0:08:18.218	IT2	0.0808227	8	0.302784
Trial 1	1.3	Rep	M	0:08:18.218-0:08:18.484	IT2	0.062099	8	0.232637
Trial 1	1.3	Rep	M	0:08:18.484-0:08:18.750	IT2	0.0883146	8	0.330847
Trial 1	1.3	Rep	M	0:08:18.750-0:08:19.016	IT2	0.0702866	8	0.263311
Trial 1	1.3	Rep	M	0:08:19.016-0:08:19.282	IT2	0.100465	8	0.376366
Trial 1	1.3	Rep	M	0:08:19.282-0:08:19.548	IT2	0.0946618	8	0.354625
Trial 1	1.3	Rep	M	0:08:19.548-0:08:19.814	IT2	0.177934	8	0.666586
Trial 1	1.3	Rep	M	0:08:19.814-0:08:20.080	IT2	0.352392	8	1.32015
Trial 1	1.3	Rep	M	0:08:20.080-0:08:20.346	IT2	0.209813	8	0.786006
Trial 1	1.3	Rep	M	0:08:20.346-0:08:20.612	IT2	0.0252644	8	0.0946464
Trial 1	1.3	Rep	M	0:08:20.612-0:08:20.878	IT2	0.30626	8	1.14732
Trial 1	1.3	Rep	M	0:08:20.878-0:08:21.144	IT2	0.147774	8	0.553598
Trial 1	1.3	Rep	M	0:08:21.144-0:08:21.410	IT2	0.0639858	8	0.239707
Trial 1	1.3	Rep	M	0:08:21.410-0:08:21.676	IT2	0.174519	8	0.65379
Trial 1	1.3	Rep	M	0:08:21.676-0:08:21.942	IT2	0.0471127	8	0.176497
Trial 1	1.3	Rep	M	0:08:21.942-0:08:22.208	IT2	0.0866898	8	0.324763
Trial 1	1.3	Rep	M	0:08:22.208-0:08:22.474	IT2	0.0437569	8	0.163924
Trial 1	1.3	Rep	M	0:08:22.474-0:08:22.740	IT2	0.0675609	8	0.2531
Trial 1	1.3	Rep	M	0:08:22.740-0:08:23.006	IT2	0.117499	8	0.440179
Trial 1	1.3	Rep	M	0:08:23.006-0:08:23.272	IT2	0.0647984	8	0.242751
Trial 1	1.3	Rep	M	0:08:23.272-0:08:23.538	IT2	0.177938	8	0.666604
Trial 1	1.3	Rep	M	0:08:23.538-0:08:23.804	IT2	0.20322	8	0.76131
Trial 1	1.3	Rep	M	0:08:23.804-0:08:24.070	IT2	0.112884	7	0.483306
Trial 1	1.3	Rep	M	0:08:24.070-0:08:24.336	IT2	0.154176	8	0.577587
Trial 1	1.3	Rep	M	0:08:24.336-0:08:24.602	IT2	0.186181	8	0.697479
Trial 1	1.3	Rep	M	0:08:24.602-0:08:24.868	IT2	0.255143	8	0.95583
Trial 1	1.3	Rep	M	0:08:24.868-0:08:25.134	IT2	0.106825	8	0.400194
Trial 1	1.3	Rep	M	0:08:25.134-0:08:25.400	IT2	0.111717	8	0.41852
Trial 1	1.3	Rep	M	0:08:25.400-0:08:25.666	IT2	0.0282161	8	0.105705
Trial 1	1.3	Rep	M	0:08:25.666-0:08:25.932	IT2	0.0682024	8	0.255504
Trial 1	1.3	Rep	M	0:08:25.932-0:08:26.198	IT2	0.0835149	8	0.312868
Trial 1	1.3	Rep	M	0:08:26.198-0:08:26.464	IT2	0.0690011	8	0.258495
Trial 1	1.3	Rep	M	0:08:26.464-0:08:26.730	IT2	0.146457	8	0.548667
Trial 1	1.3	Rep	M	0:08:26.730-0:08:26.996	IT2	0.110657	8	0.414548
Trial 1	1.3	Rep	M	0:08:26.996-0:08:27.262	IT2	0.0656638	8	0.245993
Trial 1	1.3	Rep	M	0:08:27.262-0:08:27.528	IT2	0.153027	8	0.573273
Trial 1	1.3	Rep	M	0:08:27.528-0:08:27.794	IT2	0.16085	8	0.602585
Trial 1	1.3	Rep	M	0:08:27.794-0:08:28.060	IT2	0.129479	8	0.485058
Trial 1	1.3	Rep	M	0:08:28.060-0:08:28.326	IT2	0.153498	8	0.575041
Trial 1	1.3	Rep	M	0:08:28.326-0:08:28.592	IT2	0.0843614	8	0.316038
Trial 1	1.3	Rep	M	0:08:28.592-0:08:28.858	IT2	0.0711759	8	0.266642
Trial 1	1.3	Rep	M	0:08:28.858-0:08:29.124	IT2	0.0629787	8	0.235935
Trial 1	1.3	Rep	M	0:08:29.124-0:08:29.390	IT2	0.0432685	8	0.162095
Trial 1	1.3	Rep	M	0:08:29.390-0:08:29.656	IT2	0.0331301	8	0.124114
Trial 1	1.3	Rep	M	0:08:29.656-0:08:29.922	IT2	0.0857427	8	0.321211
Trial 1	1.3	Rep	M	0:08:29.922-0:08:30.188	IT2	0.085536	8	0.320439
Trial 1	1.3	Rep	M	0:08:30.188-0:08:30.454	IT2	0.0695061	8	0.260388
Trial 1	1.3	Rep	M	0:08:30.454-0:08:30.720	IT2	0.126405	8	0.473543
Trial 1	1.3	Rep	M	0:08:30.720-0:08:30.986	IT2	0.0324354	8	0.121511
Trial 1	1.3	Rep	M	0:08:30.986-0:08:31.252	IT2	0.0457269	8	0.171303
Trial 1	1.3	Rep	M	0:08:31.252-0:08:31.518	IT2	0.0410634	8	0.153833
Trial 1	1.3	Rep	M	0:08:31.518-0:08:31.784	IT2	0.074011	8	0.277264
Trial 1	1.3	Rep	M	0:08:31.784-0:08:32.050	IT2	0.0741125	8	0.277643
Trial 1	1.3	Rep	M	0:08:32.050-0:08:32.316	IT2	0.189155	8	0.708628
Trial 1	1.3	Rep	M	0:08:32.316-0:08:32.582	IT2	0.321978	8	1.20621
Trial 1	1.3	Rep	M	0:08:32.582-0:08:32.848	IT2	0.164783	8	0.617318
Trial 1	1.3	Rep	M	0:08:32.848-0:08:33.114	IT2	0.260548	8	0.976088
Trial 1	1.3	Rep	M	0:08:33.114-0:08:33.380	IT2	0.166691	7	0.713683
Trial 1	1.3	Rep	M	0:08:33.380-0:08:33.646	IT2	0.122248	8	0.457969
Trial 1	1.3	Rep	M	0:08:33.646-0:08:33.912	IT2	0.0750072	8	0.280997
Trial 1	1.3	Rep	M	0:08:33.912-0:08:34.178	IT2	0.0751961	8	0.281701
Trial 1	1.3	Rep	M	0:08:34.178-0:08:34.444	IT2	0.0521584	8	0.195399
Trial 1	1.3	Rep	M	0:08:34.444-0:08:34.710	IT2	0.0494962	8	0.185424
Trial 1	1.3	Rep	M	0:08:34.710-0:08:34.976	IT2	0.0516281	8	0.193412
Trial 1	1.3	Rep	M	0:08:34.976-0:08:35.242	IT2	0.0865692	8	0.324311
Trial 1	1.3	Rep	M	0:08:35.242-0:08:35.508	IT2	0.140635	8	0.526858
Trial 1	1.3	Rep	M	0:08:35.508-0:08:35.774	IT2	0.0665816	8	0.249433
Trial 1	1.3	Rep	M	0:08:35.774-0:08:36.040	IT2	0.116333	8	0.435817
Trial 1	1.3	Rep	M	0:08:36.040-0:08:36.306	IT2	0.0406051	8	0.152118
Trial 1	1.3	Rep	M	0:08:36.306-0:08:36.572	IT2	0.0417442	8	0.156384
Trial 1	1.3	Rep	M	0:08:36.572-0:08:36.838	IT2	0.125559	8	0.470375
Trial 1	1.3	Rep	M	0:08:36.838-0:08:37.104	IT2	0.0615876	8	0.230723
Trial 1	1.3	Rep	M	0:08:37.104-0:08:37.370	IT2	0.174544	8	0.653881
Trial 1	1.3	Rep	M	0:08:37.370-0:08:37.636	IT2	0.524484	8	1.96484
Trial 1	1.3	Rep	M	0:08:37.636-0:08:37.902	IT2	0.32477	8	1.21667
Trial 1	1.3	Rep	M	0:08:37.902-0:08:38.168	IT2	0.155088	8	0.580995
Trial 1	1.3	Rep	M	0:08:38.168-0:08:38.434	IT2	0.159734	8	0.598406
Trial 1	1.3	Rep	M	0:08:38.434-0:08:38.700	IT2	0.179589	8	0.672783
Trial 1	1.3	Rep	M	0:08:38.700-0:08:38.966	IT2	0.162343	8	0.608175
Trial 1	1.3	Rep	M	0:08:38.966-0:08:39.232	IT2	0.152471	8	0.571192
Trial 1	1.3	Rep	M	0:08:39.232-0:08:39.498	IT2	0.0843453	8	0.315976
Trial 1	1.3	Rep	M	0:08:39.498-0:08:39.764	IT2	0.159977	8	0.599315
Trial 1	1.3	Rep	M	0:08:39.764-0:08:40.030	IT2	0.0318611	8	0.11936
Trial 1	1.3	Rep	M	0:08:40.030-0:08:40.296	IT2	0.0879508	8	0.329485
Trial 1	1.3	Rep	M	0:08:40.296-0:08:40.562	IT2	0.0461177	8	0.172768
Trial 1	1.3	Rep	M	0:08:40.562-0:08:40.828	IT2	0.0721386	8	0.270249
Trial 1	1.3	Rep	M	0:08:40.828-0:08:41.094	IT2	0.146373	8	0.548351
Trial 1	1.3	Rep	M	0:08:41.094-0:08:41.360	IT2	0.338956	8	1.26981
Trial 1	1.3	Rep	M	0:08:41.360-0:08:41.626	IT2	0.199952	8	0.749069
Trial 1	1.3	Rep	M	0:08:41.626-0:08:41.892	IT2	0.137527	8	0.515212
Trial 1	1.3	Rep	M	0:08:41.892-0:08:42.158	IT2	0.0524526	8	0.196501
Trial 1	1.3	Rep	M	0:08:42.158-0:08:42.424	IT2	0.0783474	8	0.293509
Trial 1	1.3	Rep	M	0:08:42.424-0:08:42.690	IT2	0.0780147	8	0.292263
Trial 1	1.3	Rep	M	0:08:42.690-0:08:42.956	IT2	0.0242632	7	0.103881
Trial 1	1.3	Rep	M	0:08:42.956-0:08:43.222	IT2	0.0500169	8	0.187376
Trial 1	1.3	Rep	M	0:08:43.222-0:08:43.488	IT2	0.0574054	8	0.215057
Trial 1	1.3	Rep	M	0:08:43.488-0:08:43.754	IT2	0.0212191	8	0.0794918
Trial 1	1.3	Rep	M	0:08:43.754-0:08:44.020	IT2	0.0832308	8	0.311804
Trial 1	1.3	Rep	M	0:08:44.020-0:08:44.286	IT2	0.111639	8	0.418225
Trial 1	1.3	Rep	M	0:08:44.286-0:08:44.552	IT2	0.109082	8	0.408646
Trial 1	1.3	Rep	M	0:08:44.552-0:08:44.818	IT2	0.148809	8	0.557478
Trial 1	1.3	Rep	M	0:08:44.818-0:08:45.084	IT2	0.157084	8	0.588475
Trial 1	1.3	Rep	M	0:08:45.084-0:08:45.350	IT2	0.117076	8	0.438599
Trial 1	1.3	Rep	M	0:08:45.350-0:08:45.616	IT2	0.286946	8	1.07497
Trial 1	1.3	Rep	M	0:08:45.616-0:08:45.882	IT2	0.320267	8	1.1998
Trial 1	1.3	Rep	M	0:08:45.882-0:08:46.148	IT2	0.223145	8	0.835961
Trial 1	1.3	Rep	M	0:08:46.148-0:08:46.414	IT2	0.123567	8	0.462908
Trial 1	1.3	Rep	M	0:08:46.414-0:08:46.680	IT2	0.168469	8	0.631126
Trial 1	1.3	Rep	M	0:08:46.680-0:08:46.946	IT2	0.14302	8	0.535786
Trial 1	1.3	Rep	M	0:08:46.946-0:08:47.212	IT2	0.136497	8	0.511353
Trial 1	1.3	Rep	M	0:08:47.212-0:08:47.478	IT2	0.120612	8	0.451846
Trial 1	1.3	Rep	M	0:08:47.478-0:08:47.744	IT2	0.0783238	8	0.293419
Trial 1	1.3	Rep	M	0:08:47.744-0:08:48.010	IT2	0.0785456	8	0.294252
Trial 1	1.3	Rep	M	0:08:48.010-0:08:48.276	IT2	0.159142	8	0.596184
Trial 1	1.3	Rep	M	0:08:48.276-0:08:48.542	IT2	0.13021	8	0.487797
Trial 1	1.3	Rep	M	0:08:48.542-0:08:48.808	IT2	0.225055	8	0.843118
Trial 1	1.3	Rep	M	0:08:48.808-0:08:49.074	IT2	0.0773963	8	0.289944
Trial 1	1.3	Rep	M	0:08:49.074-0:08:49.340	IT2	0.313988	8	1.17628
Trial 1	1.3	Rep	M	0:08:49.340-0:08:49.606	IT2	0.111582	8	0.418012
Trial 1	1.3	Rep	M	0:08:49.606-0:08:49.872	IT2	0.160367	8	0.600773
Trial 1	1.3	Rep	M	0:08:49.872-0:08:50.138	IT2	0.154475	8	0.578706
Trial 1	1.3	Rep	M	0:08:50.138-0:08:50.404	IT2	0.340979	8	1.27739
Trial 1	1.3	Rep	M	0:08:50.404-0:08:50.670	IT2	0.0441185	8	0.165279
Trial 1	1.3	Rep	M	0:08:50.670-0:08:50.936	IT2	0.125435	8	0.46991
[truncated: 83,518 more rows]

## Sheet: Day 3
Raw velocity data, extracted via ethovision, which is fed to R source code 1 to detect and extract darts, and to produce velocity traces
Showing Data from Test Day 3 for all animals in Experiment 1
Used to calculate Darts/minute as seen in Figure 2
Used to produce velocity traces as seen in Figure 3
Trial	Animal	Group	Sex	TimeStamp	StimPeriod	Distance_cm	Samples	Velocity
Trial 1	1.3	Rep	M	Start-0:00:00.266	BL	19.9518	7	85.4215
Trial 1	1.3	Rep	M	0:00:00.266-0:00:00.532	BL	44.0498	8	165.023
Trial 1	1.3	Rep	M	0:00:00.532-0:00:00.798	BL	1.67223	8	6.26458
Trial 1	1.3	Rep	M	0:00:00.798-0:00:01.064	BL	0.65888	8	2.46834
Trial 1	1.3	Rep	M	0:00:01.064-0:00:01.330	BL	0.748719	8	2.80488
Trial 1	1.3	Rep	M	0:00:01.330-0:00:01.596	BL	0.402521	8	1.50794
Trial 1	1.3	Rep	M	0:00:01.596-0:00:01.862	BL	0.60014	8	2.24828
Trial 1	1.3	Rep	M	0:00:01.862-0:00:02.128	BL	0.476138	8	1.78372
Trial 1	1.3	Rep	M	0:00:02.128-0:00:02.394	BL	1.59935	8	5.99157
Trial 1	1.3	Rep	M	0:00:02.394-0:00:02.660	BL	1.55875	8	5.83948
Trial 1	1.3	Rep	M	0:00:02.660-0:00:02.926	BL	0.796842	8	2.98517
Trial 1	1.3	Rep	M	0:00:02.926-0:00:03.192	BL	1.70484	8	6.38674
Trial 1	1.3	Rep	M	0:00:03.192-0:00:03.458	BL	1.2546	8	4.70002
Trial 1	1.3	Rep	M	0:00:03.458-0:00:03.724	BL	0.959916	8	3.59608
Trial 1	1.3	Rep	M	0:00:03.724-0:00:03.990	BL	1.34141	8	5.02524
Trial 1	1.3	Rep	M	0:00:03.990-0:00:04.256	BL	0.94323	8	3.53357
Trial 1	1.3	Rep	M	0:00:04.256-0:00:04.522	BL	1.1684	8	4.3771
Trial 1	1.3	Rep	M	0:00:04.522-0:00:04.788	BL	0.613921	8	2.29989
Trial 1	1.3	Rep	M	0:00:04.788-0:00:05.054	BL	1.48459	8	5.56168
Trial 1	1.3	Rep	M	0:00:05.054-0:00:05.320	BL	0.188293	8	0.705397
Trial 1	1.3	Rep	M	0:00:05.320-0:00:05.586	BL	1.00468	8	3.76383
Trial 1	1.3	Rep	M	0:00:05.586-0:00:05.852	BL	3.01793	8	11.306
Trial 1	1.3	Rep	M	0:00:05.852-0:00:06.118	BL	1.14233	8	4.27943
Trial 1	1.3	Rep	M	0:00:06.118-0:00:06.384	BL	0.707004	8	2.64862
Trial 1	1.3	Rep	M	0:00:06.384-0:00:06.650	BL	1.4304	8	5.35863
Trial 1	1.3	Rep	M	0:00:06.650-0:00:06.916	BL	1.97896	8	7.4137
Trial 1	1.3	Rep	M	0:00:06.916-0:00:07.182	BL	2.17365	8	8.14302
Trial 1	1.3	Rep	M	0:00:07.182-0:00:07.448	BL	0.703786	8	2.63655
Trial 1	1.3	Rep	M	0:00:07.448-0:00:07.714	BL	0.626976	8	2.34882
Trial 1	1.3	Rep	M	0:00:07.714-0:00:07.980	BL	2.19687	8	8.23001
Trial 1	1.3	Rep	M	0:00:07.980-0:00:08.246	BL	3.15424	8	11.8166
Trial 1	1.3	Rep	M	0:00:08.246-0:00:08.512	BL	3.78782	8	14.1901
Trial 1	1.3	Rep	M	0:00:08.512-0:00:08.778	BL	2.64475	8	9.90788
Trial 1	1.3	Rep	M	0:00:08.778-0:00:09.044	BL	1.76495	8	6.61195
Trial 1	1.3	Rep	M	0:00:09.044-0:00:09.310	BL	0.593259	8	2.22249
Trial 1	1.3	Rep	M	0:00:09.310-0:00:09.576	BL	0.66647	7	2.85344
Trial 1	1.3	Rep	M	0:00:09.576-0:00:09.842	BL	1.18832	8	4.45176
Trial 1	1.3	Rep	M	0:00:09.842-0:00:10.108	BL	0.471615	8	1.76679
Trial 1	1.3	Rep	M	0:00:10.108-0:00:10.374	BL	0.634378	8	2.37654
Trial 1	1.3	Rep	M	0:00:10.374-0:00:10.640	BL	0.240779	8	0.902021
Trial 1	1.3	Rep	M	0:00:10.640-0:00:10.906	BL	0.33144	8	1.24166
Trial 1	1.3	Rep	M	0:00:10.906-0:00:11.172	BL	0.166384	8	0.623318
Trial 1	1.3	Rep	M	0:00:11.172-0:00:11.438	BL	0.136714	8	0.512164
Trial 1	1.3	Rep	M	0:00:11.438-0:00:11.704	BL	0.16884	8	0.632515
Trial 1	1.3	Rep	M	0:00:11.704-0:00:11.970	BL	0.175128	8	0.656077
Trial 1	1.3	Rep	M	0:00:11.970-0:00:12.236	BL	0.123573	8	0.462933
Trial 1	1.3	Rep	M	0:00:12.236-0:00:12.502	BL	0.102206	8	0.382891
Trial 1	1.3	Rep	M	0:00:12.502-0:00:12.768	BL	0.107293	8	0.401945
Trial 1	1.3	Rep	M	0:00:12.768-0:00:13.034	BL	0.168331	8	0.630608
Trial 1	1.3	Rep	M	0:00:13.034-0:00:13.300	BL	0.218625	8	0.819025
Trial 1	1.3	Rep	M	0:00:13.300-0:00:13.566	BL	0.104695	8	0.392212
Trial 1	1.3	Rep	M	0:00:13.566-0:00:13.832	BL	0.179242	8	0.671484
Trial 1	1.3	Rep	M	0:00:13.832-0:00:14.098	BL	0.178887	8	0.670155
Trial 1	1.3	Rep	M	0:00:14.098-0:00:14.364	BL	0.110773	8	0.414982
Trial 1	1.3	Rep	M	0:00:14.364-0:00:14.630	BL	0.258123	8	0.966991
Trial 1	1.3	Rep	M	0:00:14.630-0:00:14.896	BL	0.164813	8	0.617432
Trial 1	1.3	Rep	M	0:00:14.896-0:00:15.162	BL	0.199665	8	0.747999
Trial 1	1.3	Rep	M	0:00:15.162-0:00:15.428	BL	0.116433	8	0.436186
Trial 1	1.3	Rep	M	0:00:15.428-0:00:15.694	BL	0.158964	8	0.595517
Trial 1	1.3	Rep	M	0:00:15.694-0:00:15.960	BL	0.0909969	8	0.340898
Trial 1	1.3	Rep	M	0:00:15.960-0:00:16.226	BL	0.061472	8	0.230289
Trial 1	1.3	Rep	M	0:00:16.226-0:00:16.492	BL	0.085229	8	0.319288
Trial 1	1.3	Rep	M	0:00:16.492-0:00:16.758	BL	0.0738071	8	0.276499
Trial 1	1.3	Rep	M	0:00:16.758-0:00:17.024	BL	0.168549	8	0.631432
Trial 1	1.3	Rep	M	0:00:17.024-0:00:17.290	BL	0.107312	8	0.402019
Trial 1	1.3	Rep	M	0:00:17.290-0:00:17.556	BL	0.0829483	8	0.310747
Trial 1	1.3	Rep	M	0:00:17.556-0:00:17.822	BL	0.0797878	8	0.298906
Trial 1	1.3	Rep	M	0:00:17.822-0:00:18.088	BL	0.121699	8	0.455914
Trial 1	1.3	Rep	M	0:00:18.088-0:00:18.354	BL	0.217426	8	0.814531
Trial 1	1.3	Rep	M	0:00:18.354-0:00:18.620	BL	0.0966455	8	0.362057
Trial 1	1.3	Rep	M	0:00:18.620-0:00:18.886	BL	0.10338	8	0.387288
Trial 1	1.3	Rep	M	0:00:18.886-0:00:19.152	BL	0.102125	7	0.43724
Trial 1	1.3	Rep	M	0:00:19.152-0:00:19.418	BL	0.194674	8	0.729298
Trial 1	1.3	Rep	M	0:00:19.418-0:00:19.684	BL	0.0721524	8	0.2703
Trial 1	1.3	Rep	M	0:00:19.684-0:00:19.950	BL	0.143008	8	0.535743
Trial 1	1.3	Rep	M	0:00:19.950-0:00:20.216	BL	0.223256	8	0.83637
Trial 1	1.3	Rep	M	0:00:20.216-0:00:20.482	BL	0.0726567	8	0.272188
Trial 1	1.3	Rep	M	0:00:20.482-0:00:20.748	BL	0.105073	8	0.39363
Trial 1	1.3	Rep	M	0:00:20.748-0:00:21.014	BL	0.177324	8	0.664296
Trial 1	1.3	Rep	M	0:00:21.014-0:00:21.280	BL	0.164949	8	0.617944
Trial 1	1.3	Rep	M	0:00:21.280-0:00:21.546	BL	0.120683	8	0.452108
Trial 1	1.3	Rep	M	0:00:21.546-0:00:21.812	BL	0.181785	8	0.681009
Trial 1	1.3	Rep	M	0:00:21.812-0:00:22.078	BL	0.0791064	8	0.296353
Trial 1	1.3	Rep	M	0:00:22.078-0:00:22.344	BL	0.0730351	8	0.273608
Trial 1	1.3	Rep	M	0:00:22.344-0:00:22.610	BL	0.0847045	8	0.317323
Trial 1	1.3	Rep	M	0:00:22.610-0:00:22.876	BL	0.0967685	8	0.36252
Trial 1	1.3	Rep	M	0:00:22.876-0:00:23.142	BL	0.150525	8	0.563903
Trial 1	1.3	Rep	M	0:00:23.142-0:00:23.408	BL	0.177272	8	0.664106
Trial 1	1.3	Rep	M	0:00:23.408-0:00:23.674	BL	0.117697	8	0.440919
Trial 1	1.3	Rep	M	0:00:23.674-0:00:23.940	BL	0.158692	8	0.594501
Trial 1	1.3	Rep	M	0:00:23.940-0:00:24.206	BL	0.202381	8	0.75817
Trial 1	1.3	Rep	M	0:00:24.206-0:00:24.472	BL	0.102745	8	0.384909
Trial 1	1.3	Rep	M	0:00:24.472-0:00:24.738	BL	0.0947871	8	0.355097
Trial 1	1.3	Rep	M	0:00:24.738-0:00:25.004	BL	0.0585494	8	0.219341
Trial 1	1.3	Rep	M	0:00:25.004-0:00:25.270	BL	0.255075	8	0.955577
Trial 1	1.3	Rep	M	0:00:25.270-0:00:25.536	BL	0.129179	8	0.483934
Trial 1	1.3	Rep	M	0:00:25.536-0:00:25.802	BL	0.102176	8	0.38278
Trial 1	1.3	Rep	M	0:00:25.802-0:00:26.068	BL	0.18032	8	0.675525
Trial 1	1.3	Rep	M	0:00:26.068-0:00:26.334	BL	0.128692	8	0.482109
Trial 1	1.3	Rep	M	0:00:26.334-0:00:26.600	BL	0.145648	8	0.545633
Trial 1	1.3	Rep	M	0:00:26.600-0:00:26.866	BL	0.104402	8	0.391118
Trial 1	1.3	Rep	M	0:00:26.866-0:00:27.132	BL	0.149933	8	0.561688
Trial 1	1.3	Rep	M	0:00:27.132-0:00:27.398	BL	0.199814	8	0.74856
Trial 1	1.3	Rep	M	0:00:27.398-0:00:27.664	BL	0.229199	8	0.858637
Trial 1	1.3	Rep	M	0:00:27.664-0:00:27.930	BL	0.247668	8	0.927829
Trial 1	1.3	Rep	M	0:00:27.930-0:00:28.196	BL	0.152676	8	0.571963
Trial 1	1.3	Rep	M	0:00:28.196-0:00:28.462	BL	0.512309	8	1.91923
Trial 1	1.3	Rep	M	0:00:28.462-0:00:28.728	BL	0.250274	7	1.07153
Trial 1	1.3	Rep	M	0:00:28.728-0:00:28.994	BL	0.15792	8	0.591609
Trial 1	1.3	Rep	M	0:00:28.994-0:00:29.260	BL	0.131511	8	0.492669
Trial 1	1.3	Rep	M	0:00:29.260-0:00:29.526	BL	0.149657	8	0.56065
Trial 1	1.3	Rep	M	0:00:29.526-0:00:29.792	BL	0.120607	8	0.451827
Trial 1	1.3	Rep	M	0:00:29.792-0:00:30.058	BL	0.160006	8	0.599423
Trial 1	1.3	Rep	M	0:00:30.058-0:00:30.324	BL	0.164807	8	0.617413
Trial 1	1.3	Rep	M	0:00:30.324-0:00:30.590	BL	0.140473	8	0.526246
Trial 1	1.3	Rep	M	0:00:30.590-0:00:30.856	BL	0.185239	8	0.693948
Trial 1	1.3	Rep	M	0:00:30.856-0:00:31.122	BL	0.15028	8	0.562986
Trial 1	1.3	Rep	M	0:00:31.122-0:00:31.388	BL	0.117977	8	0.441969
Trial 1	1.3	Rep	M	0:00:31.388-0:00:31.654	BL	0.16542	8	0.619707
Trial 1	1.3	Rep	M	0:00:31.654-0:00:31.920	BL	0.273804	8	1.02574
Trial 1	1.3	Rep	M	0:00:31.920-0:00:32.186	BL	0.191354	8	0.716864
Trial 1	1.3	Rep	M	0:00:32.186-0:00:32.452	BL	0.195953	8	0.734087
Trial 1	1.3	Rep	M	0:00:32.452-0:00:32.718	BL	0.151996	8	0.569416
Trial 1	1.3	Rep	M	0:00:32.718-0:00:32.984	BL	0.0648478	8	0.242936
Trial 1	1.3	Rep	M	0:00:32.984-0:00:33.250	BL	0.152098	8	0.569794
Trial 1	1.3	Rep	M	0:00:33.250-0:00:33.516	BL	0.117084	8	0.438626
Trial 1	1.3	Rep	M	0:00:33.516-0:00:33.782	BL	0.160355	8	0.600729
Trial 1	1.3	Rep	M	0:00:33.782-0:00:34.048	BL	0.102655	8	0.384571
Trial 1	1.3	Rep	M	0:00:34.048-0:00:34.314	BL	0.127476	8	0.477559
Trial 1	1.3	Rep	M	0:00:34.314-0:00:34.580	BL	0.141808	8	0.531247
Trial 1	1.3	Rep	M	0:00:34.580-0:00:34.846	BL	0.164872	8	0.617654
Trial 1	1.3	Rep	M	0:00:34.846-0:00:35.112	BL	0.147248	8	0.551626
Trial 1	1.3	Rep	M	0:00:35.112-0:00:35.378	BL	0.216409	8	0.81072
Trial 1	1.3	Rep	M	0:00:35.378-0:00:35.644	BL	0.13107	8	0.491021
Trial 1	1.3	Rep	M	0:00:35.644-0:00:35.910	BL	0.0975577	8	0.365474
Trial 1	1.3	Rep	M	0:00:35.910-0:00:36.176	BL	0.104599	8	0.391856
Trial 1	1.3	Rep	M	0:00:36.176-0:00:36.442	BL	0.148981	8	0.558123
Trial 1	1.3	Rep	M	0:00:36.442-0:00:36.708	BL	0.147434	8	0.552324
Trial 1	1.3	Rep	M	0:00:36.708-0:00:36.974	BL	0.13271	8	0.497166
Trial 1	1.3	Rep	M	0:00:36.974-0:00:37.240	BL	0.0743823	8	0.278654
Trial 1	1.3	Rep	M	0:00:37.240-0:00:37.506	BL	0.182237	8	0.682704
Trial 1	1.3	Rep	M	0:00:37.506-0:00:37.772	BL	0.137818	8	0.5163
Trial 1	1.3	Rep	M	0:00:37.772-0:00:38.038	BL	0.130182	7	0.557369
Trial 1	1.3	Rep	M	0:00:38.038-0:00:38.304	BL	0.118925	8	0.445521
Trial 1	1.3	Rep	M	0:00:38.304-0:00:38.570	BL	0.19728	8	0.73906
Trial 1	1.3	Rep	M	0:00:38.570-0:00:38.836	BL	0.230616	8	0.86394
Trial 1	1.3	Rep	M	0:00:38.836-0:00:39.102	BL	0.179985	8	0.674271
Trial 1	1.3	Rep	M	0:00:39.102-0:00:39.368	BL	0.138394	8	0.518458
Trial 1	1.3	Rep	M	0:00:39.368-0:00:39.634	BL	0.12172	8	0.455992
Trial 1	1.3	Rep	M	0:00:39.634-0:00:39.900	BL	0.11745	8	0.439994
Trial 1	1.3	Rep	M	0:00:39.900-0:00:40.166	BL	0.167384	8	0.627061
Trial 1	1.3	Rep	M	0:00:40.166-0:00:40.432	BL	0.226544	8	0.848692
Trial 1	1.3	Rep	M	0:00:40.432-0:00:40.698	BL	0.151987	8	0.569382
Trial 1	1.3	Rep	M	0:00:40.698-0:00:40.964	BL	0.149357	8	0.559529
Trial 1	1.3	Rep	M	0:00:40.964-0:00:41.230	BL	0.0641064	8	0.240158
Trial 1	1.3	Rep	M	0:00:41.230-0:00:41.496	BL	0.205497	8	0.769843
Trial 1	1.3	Rep	M	0:00:41.496-0:00:41.762	BL	0.17685	8	0.662526
Trial 1	1.3	Rep	M	0:00:41.762-0:00:42.028	BL	0.134601	8	0.504251
Trial 1	1.3	Rep	M	0:00:42.028-0:00:42.294	BL	0.113981	8	0.426999
Trial 1	1.3	Rep	M	0:00:42.294-0:00:42.560	BL	0.0996539	8	0.373329
Trial 1	1.3	Rep	M	0:00:42.560-0:00:42.826	BL	0.165188	8	0.618832
Trial 1	1.3	Rep	M	0:00:42.826-0:00:43.092	BL	0.120139	8	0.450071
Trial 1	1.3	Rep	M	0:00:43.092-0:00:43.358	BL	0.211587	8	0.792654
Trial 1	1.3	Rep	M	0:00:43.358-0:00:43.624	BL	0.0693173	8	0.25968
Trial 1	1.3	Rep	M	0:00:43.624-0:00:43.890	BL	0.118472	8	0.443825
Trial 1	1.3	Rep	M	0:00:43.890-0:00:44.156	BL	0.0737093	8	0.276133
Trial 1	1.3	Rep	M	0:00:44.156-0:00:44.422	BL	0.120487	8	0.451376
Trial 1	1.3	Rep	M	0:00:44.422-0:00:44.688	BL	0.112569	8	0.421709
Trial 1	1.3	Rep	M	0:00:44.688-0:00:44.954	BL	0.121567	8	0.455418
Trial 1	1.3	Rep	M	0:00:44.954-0:00:45.220	BL	0.152767	8	0.572301
Trial 1	1.3	Rep	M	0:00:45.220-0:00:45.486	BL	0.148729	8	0.557174
Trial 1	1.3	Rep	M	0:00:45.486-0:00:45.752	BL	0.153181	8	0.573855
Trial 1	1.3	Rep	M	0:00:45.752-0:00:46.018	BL	0.0771854	8	0.289156
Trial 1	1.3	Rep	M	0:00:46.018-0:00:46.284	BL	0.064057	8	0.239974
Trial 1	1.3	Rep	M	0:00:46.284-0:00:46.550	BL	0.0853527	8	0.319751
Trial 1	1.3	Rep	M	0:00:46.550-0:00:46.816	BL	0.0551398	8	0.206567
Trial 1	1.3	Rep	M	0:00:46.816-0:00:47.082	BL	0.132507	8	0.496403
Trial 1	1.3	Rep	M	0:00:47.082-0:00:47.348	BL	0.11011	8	0.412497
Trial 1	1.3	Rep	M	0:00:47.348-0:00:47.614	BL	0.0831959	7	0.356196
Trial 1	1.3	Rep	M	0:00:47.614-0:00:47.880	BL	0.0692008	8	0.259243
Trial 1	1.3	Rep	M	0:00:47.880-0:00:48.146	BL	0.0501859	8	0.188009
Trial 1	1.3	Rep	M	0:00:48.146-0:00:48.412	BL	0.0796445	8	0.298369
Trial 1	1.3	Rep	M	0:00:48.412-0:00:48.678	BL	0.0869573	8	0.325764
Trial 1	1.3	Rep	M	0:00:48.678-0:00:48.944	BL	0.16691	8	0.625286
Trial 1	1.3	Rep	M	0:00:48.944-0:00:49.210	BL	0.189876	8	0.711321
Trial 1	1.3	Rep	M	0:00:49.210-0:00:49.476	BL	0.116646	8	0.436985
Trial 1	1.3	Rep	M	0:00:49.476-0:00:49.742	BL	0.121427	8	0.454895
Trial 1	1.3	Rep	M	0:00:49.742-0:00:50.008	BL	0.134743	8	0.504779
Trial 1	1.3	Rep	M	0:00:50.008-0:00:50.274	BL	0.144899	8	0.54283
Trial 1	1.3	Rep	M	0:00:50.274-0:00:50.540	BL	0.258918	8	0.969969
Trial 1	1.3	Rep	M	0:00:50.540-0:00:50.806	BL	0.201348	8	0.7543
Trial 1	1.3	Rep	M	0:00:50.806-0:00:51.072	BL	0.300505	8	1.12577
Trial 1	1.3	Rep	M	0:00:51.072-0:00:51.338	BL	0.260837	8	0.977164
Trial 1	1.3	Rep	M	0:00:51.338-0:00:51.604	BL	0.107418	8	0.402412
Trial 1	1.3	Rep	M	0:00:51.604-0:00:51.870	BL	0.193615	8	0.725329
Trial 1	1.3	Rep	M	0:00:51.870-0:00:52.136	BL	0.0882578	8	0.330636
Trial 1	1.3	Rep	M	0:00:52.136-0:00:52.402	BL	0.119045	8	0.445972
Trial 1	1.3	Rep	M	0:00:52.402-0:00:52.668	BL	0.0646209	8	0.242087
Trial 1	1.3	Rep	M	0:00:52.668-0:00:52.934	BL	0.106344	8	0.398392
Trial 1	1.3	Rep	M	0:00:52.934-0:00:53.200	BL	0.115481	8	0.43262
Trial 1	1.3	Rep	M	0:00:53.200-0:00:53.466	BL	0.153948	8	0.576725
Trial 1	1.3	Rep	M	0:00:53.466-0:00:53.732	BL	0.17224	8	0.645258
Trial 1	1.3	Rep	M	0:00:53.732-0:00:53.998	BL	0.250869	8	0.93982
Trial 1	1.3	Rep	M	0:00:53.998-0:00:54.264	BL	0.330787	8	1.23921
Trial 1	1.3	Rep	M	0:00:54.264-0:00:54.530	BL	0.577134	8	2.16209
Trial 1	1.3	Rep	M	0:00:54.530-0:00:54.796	BL	0.603696	8	2.26159
Trial 1	1.3	Rep	M	0:00:54.796-0:00:55.062	BL	0.693357	8	2.59749
Trial 1	1.3	Rep	M	0:00:55.062-0:00:55.328	BL	0.269934	8	1.01125
Trial 1	1.3	Rep	M	0:00:55.328-0:00:55.594	BL	0.492219	8	1.84397
Trial 1	1.3	Rep	M	0:00:55.594-0:00:55.860	BL	0.498426	8	1.86723
Trial 1	1.3	Rep	M	0:00:55.860-0:00:56.126	BL	0.634318	8	2.37631
Trial 1	1.3	Rep	M	0:00:56.126-0:00:56.392	BL	0.504779	8	1.89103
Trial 1	1.3	Rep	M	0:00:56.392-0:00:56.658	BL	0.31628	8	1.18487
Trial 1	1.3	Rep	M	0:00:56.658-0:00:56.924	BL	0.221023	8	0.828004
Trial 1	1.3	Rep	M	0:00:56.924-0:00:57.190	BL	0.241907	7	1.03571
Trial 1	1.3	Rep	M	0:00:57.190-0:00:57.456	BL	0.596209	8	2.23356
Trial 1	1.3	Rep	M	0:00:57.456-0:00:57.722	BL	0.924682	8	3.46409
Trial 1	1.3	Rep	M	0:00:57.722-0:00:57.988	BL	0.409499	8	1.53409
Trial 1	1.3	Rep	M	0:00:57.988-0:00:58.254	BL	0.252921	8	0.947502
Trial 1	1.3	Rep	M	0:00:58.254-0:00:58.520	BL	0.217102	8	0.813317
Trial 1	1.3	Rep	M	0:00:58.520-0:00:58.786	BL	0.28458	8	1.06611
Trial 1	1.3	Rep	M	0:00:58.786-0:00:59.052	BL	0.345692	8	1.29505
Trial 1	1.3	Rep	M	0:00:59.052-0:00:59.318	BL	0.235825	8	0.883458
Trial 1	1.3	Rep	M	0:00:59.318-0:00:59.584	BL	0.505816	8	1.89491
Trial 1	1.3	Rep	M	0:00:59.584-0:00:59.850	BL	1.84523	8	6.91268
Trial 1	1.3	Rep	M	0:00:59.850-0:01:00.116	BL	2.55689	8	9.57879
Trial 1	1.3	Rep	M	0:01:00.116-0:01:00.382	BL	1.98628	8	7.44111
Trial 1	1.3	Rep	M	0:01:00.382-0:01:00.648	BL	0.522279	8	1.95659
Trial 1	1.3	Rep	M	0:01:00.648-0:01:00.914	BL	0.57021	8	2.13615
Trial 1	1.3	Rep	M	0:01:00.914-0:01:01.180	BL	2.26752	8	8.49467
Trial 1	1.3	Rep	M	0:01:01.180-0:01:01.446	BL	3.49181	8	13.0812
Trial 1	1.3	Rep	M	0:01:01.446-0:01:01.712	BL	2.84113	8	10.6436
Trial 1	1.3	Rep	M	0:01:01.712-0:01:01.978	BL	2.17701	8	8.15565
Trial 1	1.3	Rep	M	0:01:01.978-0:01:02.244	BL	1.91405	8	7.17049
Trial 1	1.3	Rep	M	0:01:02.244-0:01:02.510	BL	0.548867	8	2.05619
Trial 1	1.3	Rep	M	0:01:02.510-0:01:02.776	BL	0.497792	8	1.86486
Trial 1	1.3	Rep	M	0:01:02.776-0:01:03.042	BL	0.929584	8	3.48245
Trial 1	1.3	Rep	M	0:01:03.042-0:01:03.308	BL	0.731099	8	2.73889
Trial 1	1.3	Rep	M	0:01:03.308-0:01:03.574	BL	0.312406	8	1.17035
Trial 1	1.3	Rep	M	0:01:03.574-0:01:03.840	BL	0.696133	8	2.60789
Trial 1	1.3	Rep	M	0:01:03.840-0:01:04.106	BL	0.465852	8	1.74519
Trial 1	1.3	Rep	M	0:01:04.106-0:01:04.372	BL	0.167218	8	0.626441
Trial 1	1.3	Rep	M	0:01:04.372-0:01:04.638	BL	0.201799	8	0.755996
Trial 1	1.3	Rep	M	0:01:04.638-0:01:04.904	BL	0.365247	8	1.3683
Trial 1	1.3	Rep	M	0:01:04.904-0:01:05.170	BL	0.35409	8	1.32651
Trial 1	1.3	Rep	M	0:01:05.170-0:01:05.436	BL	0.501987	8	1.88057
Trial 1	1.3	Rep	M	0:01:05.436-0:01:05.702	BL	0.191646	8	0.717953
Trial 1	1.3	Rep	M	0:01:05.702-0:01:05.968	BL	0.279855	8	1.04841
Trial 1	1.3	Rep	M	0:01:05.968-0:01:06.234	BL	0.207702	8	0.778101
Trial 1	1.3	Rep	M	0:01:06.234-0:01:06.500	BL	0.129036	8	0.4834
Trial 1	1.3	Rep	M	0:01:06.500-0:01:06.766	BL	0.15137	7	0.648076
Trial 1	1.3	Rep	M	0:01:06.766-0:01:07.032	BL	0.20641	8	0.773265
Trial 1	1.3	Rep	M	0:01:07.032-0:01:07.298	BL	0.0794202	8	0.297526
Trial 1	1.3	Rep	M	0:01:07.298-0:01:07.564	BL	0.209722	8	0.785668
Trial 1	1.3	Rep	M	0:01:07.564-0:01:07.830	BL	0.168406	8	0.630888
Trial 1	1.3	Rep	M	0:01:07.830-0:01:08.096	BL	0.251598	8	0.942549
Trial 1	1.3	Rep	M	0:01:08.096-0:01:08.362	BL	0.287467	8	1.07692
Trial 1	1.3	Rep	M	0:01:08.362-0:01:08.628	BL	0.419375	8	1.57108
Trial 1	1.3	Rep	M	0:01:08.628-0:01:08.894	BL	0.24337	8	0.911723
Trial 1	1.3	Rep	M	0:01:08.894-0:01:09.160	BL	0.278024	8	1.04155
Trial 1	1.3	Rep	M	0:01:09.160-0:01:09.426	BL	0.192182	8	0.719964
Trial 1	1.3	Rep	M	0:01:09.426-0:01:09.692	BL	0.335455	8	1.2567
Trial 1	1.3	Rep	M	0:01:09.692-0:01:09.958	BL	0.382485	8	1.43289
Trial 1	1.3	Rep	M	0:01:09.958-0:01:10.224	BL	0.593875	8	2.22481
Trial 1	1.3	Rep	M	0:01:10.224-0:01:10.490	BL	0.660982	8	2.4762
Trial 1	1.3	Rep	M	0:01:10.490-0:01:10.756	BL	0.39259	8	1.47074
Trial 1	1.3	Rep	M	0:01:10.756-0:01:11.022	BL	0.153019	8	0.573248
Trial 1	1.3	Rep	M	0:01:11.022-0:01:11.288	BL	0.248057	8	0.92928
Trial 1	1.3	Rep	M	0:01:11.288-0:01:11.554	BL	0.606256	8	2.2712
Trial 1	1.3	Rep	M	0:01:11.554-0:01:11.820	BL	0.418238	8	1.56682
Trial 1	1.3	Rep	M	0:01:11.820-0:01:12.086	BL	0.236979	8	0.887783
Trial 1	1.3	Rep	M	0:01:12.086-0:01:12.352	BL	0.110809	8	0.415119
Trial 1	1.3	Rep	M	0:01:12.352-0:01:12.618	BL	0.173885	8	0.651415
Trial 1	1.3	Rep	M	0:01:12.618-0:01:12.884	BL	0.252333	8	0.945304
Trial 1	1.3	Rep	M	0:01:12.884-0:01:13.150	BL	0.194266	8	0.727768
Trial 1	1.3	Rep	M	0:01:13.150-0:01:13.416	BL	0.133815	8	0.501302
Trial 1	1.3	Rep	M	0:01:13.416-0:01:13.682	BL	0.352755	8	1.32151
Trial 1	1.3	Rep	M	0:01:13.682-0:01:13.948	BL	1.16633	8	4.36935
Trial 1	1.3	Rep	M	0:01:13.948-0:01:14.214	BL	1.1115	8	4.16397
Trial 1	1.3	Rep	M	0:01:14.214-0:01:14.480	BL	1.33007	8	4.98277
Trial 1	1.3	Rep	M	0:01:14.480-0:01:14.746	BL	1.40801	8	5.27476
Trial 1	1.3	Rep	M	0:01:14.746-0:01:15.012	BL	0.353301	8	1.32356
Trial 1	1.3	Rep	M	0:01:15.012-0:01:15.278	BL	0.194345	8	0.728062
Trial 1	1.3	Rep	M	0:01:15.278-0:01:15.544	BL	0.228832	8	0.857267
Trial 1	1.3	Rep	M	0:01:15.544-0:01:15.810	BL	0.241466	8	0.904592
Trial 1	1.3	Rep	M	0:01:15.810-0:01:16.076	BL	0.769627	7	3.2951
Trial 1	1.3	Rep	M	0:01:16.076-0:01:16.342	BL	2.85715	8	10.7036
Trial 1	1.3	Rep	M	0:01:16.342-0:01:16.608	BL	2.98898	8	11.1974
Trial 1	1.3	Rep	M	0:01:16.608-0:01:16.874	BL	2.63756	8	9.88097
Trial 1	1.3	Rep	M	0:01:16.874-0:01:17.140	BL	1.6262	8	6.09218
Trial 1	1.3	Rep	M	0:01:17.140-0:01:17.406	BL	1.19147	8	4.46352
Trial 1	1.3	Rep	M	0:01:17.406-0:01:17.672	BL	1.89967	8	7.11664
Trial 1	1.3	Rep	M	0:01:17.672-0:01:17.938	BL	0.616641	8	2.31008
Trial 1	1.3	Rep	M	0:01:17.938-0:01:18.204	BL	0.57586	8	2.15731
Trial 1	1.3	Rep	M	0:01:18.204-0:01:18.470	BL	0.886192	8	3.3199
Trial 1	1.3	Rep	M	0:01:18.470-0:01:18.736	BL	0.351934	8	1.31843
Trial 1	1.3	Rep	M	0:01:18.736-0:01:19.002	BL	0.290254	8	1.08736
Trial 1	1.3	Rep	M	0:01:19.002-0:01:19.268	BL	0.106529	8	0.399082
Trial 1	1.3	Rep	M	0:01:19.268-0:01:19.534	BL	0.226718	8	0.84934
Trial 1	1.3	Rep	M	0:01:19.534-0:01:19.800	BL	0.566515	8	2.12231
Trial 1	1.3	Rep	M	0:01:19.800-0:01:20.066	BL	0.483382	8	1.81087
Trial 1	1.3	Rep	M	0:01:20.066-0:01:20.332	BL	0.426114	8	1.59634
Trial 1	1.3	Rep	M	0:01:20.332-0:01:20.598	BL	0.278415	8	1.04301
Trial 1	1.3	Rep	M	0:01:20.598-0:01:20.864	BL	0.14865	8	0.55688
Trial 1	1.3	Rep	M	0:01:20.864-0:01:21.130	BL	0.248812	8	0.932111
Trial 1	1.3	Rep	M	0:01:21.130-0:01:21.396	BL	0.216117	8	0.809625
Trial 1	1.3	Rep	M	0:01:21.396-0:01:21.662	BL	0.198593	8	0.743978
Trial 1	1.3	Rep	M	0:01:21.662-0:01:21.928	BL	0.197395	8	0.739492
Trial 1	1.3	Rep	M	0:01:21.928-0:01:22.194	BL	0.17163	8	0.642972
Trial 1	1.3	Rep	M	0:01:22.194-0:01:22.460	BL	0.120039	8	0.449694
Trial 1	1.3	Rep	M	0:01:22.460-0:01:22.726	BL	0.167433	8	0.627249
Trial 1	1.3	Rep	M	0:01:22.726-0:01:22.992	BL	0.239299	8	0.896474
Trial 1	1.3	Rep	M	0:01:22.992-0:01:23.258	BL	0.138291	8	0.518073
Trial 1	1.3	Rep	M	0:01:23.258-0:01:23.524	BL	0.179486	8	0.672397
Trial 1	1.3	Rep	M	0:01:23.524-0:01:23.790	BL	0.285318	8	1.06888
Trial 1	1.3	Rep	M	0:01:23.790-0:01:24.056	BL	0.151798	8	0.568674
Trial 1	1.3	Rep	M	0:01:24.056-0:01:24.322	BL	0.15528	8	0.581718
Trial 1	1.3	Rep	M	0:01:24.322-0:01:24.588	BL	0.133119	8	0.498697
Trial 1	1.3	Rep	M	0:01:24.588-0:01:24.854	BL	0.200903	8	0.752627
Trial 1	1.3	Rep	M	0:01:24.854-0:01:25.120	BL	0.152085	8	0.569748
Trial 1	1.3	Rep	M	0:01:25.120-0:01:25.386	BL	0.0930665	8	0.348648
Trial 1	1.3	Rep	M	0:01:25.386-0:01:25.652	BL	0.0829419	7	0.355108
Trial 1	1.3	Rep	M	0:01:25.652-0:01:25.918	BL	0.197737	8	0.740773
Trial 1	1.3	Rep	M	0:01:25.918-0:01:26.184	BL	0.169822	8	0.636194
Trial 1	1.3	Rep	M	0:01:26.184-0:01:26.450	BL	0.152301	8	0.570558
Trial 1	1.3	Rep	M	0:01:26.450-0:01:26.716	BL	0.153453	8	0.574877
Trial 1	1.3	Rep	M	0:01:26.716-0:01:26.982	BL	0.124882	8	0.467841
Trial 1	1.3	Rep	M	0:01:26.982-0:01:27.248	BL	0.128931	8	0.483009
Trial 1	1.3	Rep	M	0:01:27.248-0:01:27.514	BL	0.104145	8	0.39015
Trial 1	1.3	Rep	M	0:01:27.514-0:01:27.780	BL	0.0687709	8	0.257631
Trial 1	1.3	Rep	M	0:01:27.780-0:01:28.046	BL	0.116472	8	0.436336
Trial 1	1.3	Rep	M	0:01:28.046-0:01:28.312	BL	0.303693	8	1.13771
Trial 1	1.3	Rep	M	0:01:28.312-0:01:28.578	BL	0.195995	8	0.734247
Trial 1	1.3	Rep	M	0:01:28.578-0:01:28.844	BL	0.131973	8	0.494405
Trial 1	1.3	Rep	M	0:01:28.844-0:01:29.110	BL	0.262939	8	0.985032
Trial 1	1.3	Rep	M	0:01:29.110-0:01:29.376	BL	0.215352	8	0.806762
Trial 1	1.3	Rep	M	0:01:29.376-0:01:29.642	BL	0.11172	8	0.418531
Trial 1	1.3	Rep	M	0:01:29.642-0:01:29.908	BL	0.0658258	8	0.2466
Trial 1	1.3	Rep	M	0:01:29.908-0:01:30.174	BL	0.138023	8	0.51707
Trial 1	1.3	Rep	M	0:01:30.174-0:01:30.440	BL	0.0653191	8	0.244702
Trial 1	1.3	Rep	M	0:01:30.440-0:01:30.706	BL	0.0570828	8	0.213846
Trial 1	1.3	Rep	M	0:01:30.706-0:01:30.972	BL	0.0811917	8	0.304163
Trial 1	1.3	Rep	M	0:01:30.972-0:01:31.238	BL	0.128777	8	0.482431
Trial 1	1.3	Rep	M	0:01:31.238-0:01:31.504	BL	0.231371	8	0.866772
Trial 1	1.3	Rep	M	0:01:31.504-0:01:31.770	BL	0.0960323	8	0.35976
Trial 1	1.3	Rep	M	0:01:31.770-0:01:32.036	BL	0.158582	8	0.594091
Trial 1	1.3	Rep	M	0:01:32.036-0:01:32.302	BL	0.1026	8	0.384364
Trial 1	1.3	Rep	M	0:01:32.302-0:01:32.568	BL	0.0968329	8	0.36276
Trial 1	1.3	Rep	M	0:01:32.568-0:01:32.834	BL	0.100578	8	0.37679
Trial 1	1.3	Rep	M	0:01:32.834-0:01:33.100	BL	0.11218	8	0.420253
Trial 1	1.3	Rep	M	0:01:33.100-0:01:33.366	BL	0.174539	8	0.653868
Trial 1	1.3	Rep	M	0:01:33.366-0:01:33.632	BL	0.186468	8	0.698552
Trial 1	1.3	Rep	M	0:01:33.632-0:01:33.898	BL	0.261098	8	0.97814
Trial 1	1.3	Rep	M	0:01:33.898-0:01:34.164	BL	0.101002	8	0.378375
Trial 1	1.3	Rep	M	0:01:34.164-0:01:34.430	BL	0.233282	8	0.873928
Trial 1	1.3	Rep	M	0:01:34.430-0:01:34.696	BL	0.0721728	8	0.270379
Trial 1	1.3	Rep	M	0:01:34.696-0:01:34.962	BL	0.176716	8	0.662026
Trial 1	1.3	Rep	M	0:01:34.962-0:01:35.228	BL	0.185505	7	0.794224
Trial 1	1.3	Rep	M	0:01:35.228-0:01:35.494	BL	0.120813	8	0.452596
Trial 1	1.3	Rep	M	0:01:35.494-0:01:35.760	BL	0.23073	8	0.864371
Trial 1	1.3	Rep	M	0:01:35.760-0:01:36.026	BL	0.166106	8	0.622275
Trial 1	1.3	Rep	M	0:01:36.026-0:01:36.292	BL	0.30016	8	1.12447
Trial 1	1.3	Rep	M	0:01:36.292-0:01:36.558	BL	0.176854	8	0.662542
Trial 1	1.3	Rep	M	0:01:36.558-0:01:36.824	BL	0.179767	8	0.673454
Trial 1	1.3	Rep	M	0:01:36.824-0:01:37.090	BL	0.187093	8	0.700899
Trial 1	1.3	Rep	M	0:01:37.090-0:01:37.356	BL	0.100671	8	0.377138
Trial 1	1.3	Rep	M	0:01:37.356-0:01:37.622	BL	0.122382	8	0.458472
Trial 1	1.3	Rep	M	0:01:37.622-0:01:37.888	BL	0.145522	8	0.545159
Trial 1	1.3	Rep	M	0:01:37.888-0:01:38.154	BL	0.12812	8	0.479972
Trial 1	1.3	Rep	M	0:01:38.154-0:01:38.420	BL	0.040666	8	0.152345
Trial 1	1.3	Rep	M	0:01:38.420-0:01:38.686	BL	0.137005	8	0.513256
Trial 1	1.3	Rep	M	0:01:38.686-0:01:38.952	BL	0.0749245	8	0.280685
Trial 1	1.3	Rep	M	0:01:38.952-0:01:39.218	BL	0.135945	8	0.509286
Trial 1	1.3	Rep	M	0:01:39.218-0:01:39.484	BL	0.068484	8	0.256559
Trial 1	1.3	Rep	M	0:01:39.484-0:01:39.750	BL	0.159438	8	0.597292
Trial 1	1.3	Rep	M	0:01:39.750-0:01:40.016	BL	0.154471	8	0.578688
Trial 1	1.3	Rep	M	0:01:40.016-0:01:40.282	BL	0.153583	8	0.57536
Trial 1	1.3	Rep	M	0:01:40.282-0:01:40.548	BL	0.288743	8	1.08171
Trial 1	1.3	Rep	M	0:01:40.548-0:01:40.814	BL	0.153609	8	0.57546
Trial 1	1.3	Rep	M	0:01:40.814-0:01:41.080	BL	0.164521	8	0.616337
Trial 1	1.3	Rep	M	0:01:41.080-0:01:41.346	BL	0.156414	8	0.585969
Trial 1	1.3	Rep	M	0:01:41.346-0:01:41.612	BL	0.177772	8	0.66598
Trial 1	1.3	Rep	M	0:01:41.612-0:01:41.878	BL	0.0976291	8	0.365743
Trial 1	1.3	Rep	M	0:01:41.878-0:01:42.144	BL	0.197127	8	0.738488
Trial 1	1.3	Rep	M	0:01:42.144-0:01:42.410	BL	0.120706	8	0.452193
Trial 1	1.3	Rep	M	0:01:42.410-0:01:42.676	BL	0.119905	8	0.449194
Trial 1	1.3	Rep	M	0:01:42.676-0:01:42.942	BL	0.2001	8	0.749623
Trial 1	1.3	Rep	M	0:01:42.942-0:01:43.208	BL	0.177137	8	0.6636
Trial 1	1.3	Rep	M	0:01:43.208-0:01:43.474	BL	0.252674	8	0.946577
Trial 1	1.3	Rep	M	0:01:43.474-0:01:43.740	BL	0.236038	8	0.884255
Trial 1	1.3	Rep	M	0:01:43.740-0:01:44.006	BL	0.151607	8	0.567962
Trial 1	1.3	Rep	M	0:01:44.006-0:01:44.272	BL	0.139926	8	0.524197
Trial 1	1.3	Rep	M	0:01:44.272-0:01:44.538	BL	0.0675207	8	0.252948
Trial 1	1.3	Rep	M	0:01:44.538-0:01:44.804	BL	0.125333	7	0.536605
Trial 1	1.3	Rep	M	0:01:44.804-0:01:45.070	BL	0.0701795	8	0.262912
Trial 1	1.3	Rep	M	0:01:45.070-0:01:45.336	BL	0.233795	8	0.875848
Trial 1	1.3	Rep	M	0:01:45.336-0:01:45.602	BL	0.199553	8	0.747579
Trial 1	1.3	Rep	M	0:01:45.602-0:01:45.868	BL	0.205263	8	0.768965
Trial 1	1.3	Rep	M	0:01:45.868-0:01:46.134	BL	0.125785	8	0.471221
Trial 1	1.3	Rep	M	0:01:46.134-0:01:46.400	BL	0.186708	8	0.699454
Trial 1	1.3	Rep	M	0:01:46.400-0:01:46.666	BL	0.125128	8	0.468757
Trial 1	1.3	Rep	M	0:01:46.666-0:01:46.932	BL	0.1851	8	0.693433
Trial 1	1.3	Rep	M	0:01:46.932-0:01:47.198	BL	0.121634	8	0.455672
Trial 1	1.3	Rep	M	0:01:47.198-0:01:47.464	BL	0.0911713	8	0.34155
Trial 1	1.3	Rep	M	0:01:47.464-0:01:47.730	BL	0.136212	8	0.510282
Trial 1	1.3	Rep	M	0:01:47.730-0:01:47.996	BL	0.10001	8	0.374664
Trial 1	1.3	Rep	M	0:01:47.996-0:01:48.262	BL	0.211769	8	0.793342
Trial 1	1.3	Rep	M	0:01:48.262-0:01:48.528	BL	0.147004	8	0.550716
Trial 1	1.3	Rep	M	0:01:48.528-0:01:48.794	BL	0.188979	8	0.707962
Trial 1	1.3	Rep	M	0:01:48.794-0:01:49.060	BL	0.186682	8	0.699358
Trial 1	1.3	Rep	M	0:01:49.060-0:01:49.326	BL	0.141212	8	0.52902
Trial 1	1.3	Rep	M	0:01:49.326-0:01:49.592	BL	0.106003	8	0.397115
Trial 1	1.3	Rep	M	0:01:49.592-0:01:49.858	BL	0.0488625	8	0.183051
Trial 1	1.3	Rep	M	0:01:49.858-0:01:50.124	BL	0.150669	8	0.564444
Trial 1	1.3	Rep	M	0:01:50.124-0:01:50.390	BL	0.0933422	8	0.349686
Trial 1	1.3	Rep	M	0:01:50.390-0:01:50.656	BL	0.0890416	8	0.333571
Trial 1	1.3	Rep	M	0:01:50.656-0:01:50.922	BL	0.108805	8	0.407611
Trial 1	1.3	Rep	M	0:01:50.922-0:01:51.188	BL	0.142413	8	0.533512
Trial 1	1.3	Rep	M	0:01:51.188-0:01:51.454	BL	0.0965154	8	0.361571
Trial 1	1.3	Rep	M	0:01:51.454-0:01:51.720	BL	0.107805	8	0.403864
Trial 1	1.3	Rep	M	0:01:51.720-0:01:51.986	BL	0.114201	8	0.427826
Trial 1	1.3	Rep	M	0:01:51.986-0:01:52.252	BL	0.127166	8	0.476399
Trial 1	1.3	Rep	M	0:01:52.252-0:01:52.518	BL	0.130993	8	0.490733
Trial 1	1.3	Rep	M	0:01:52.518-0:01:52.784	BL	0.116324	8	0.435782
Trial 1	1.3	Rep	M	0:01:52.784-0:01:53.050	BL	0.164218	8	0.615206
Trial 1	1.3	Rep	M	0:01:53.050-0:01:53.316	BL	0.121534	8	0.455295
Trial 1	1.3	Rep	M	0:01:53.316-0:01:53.582	BL	0.159649	8	0.598085
Trial 1	1.3	Rep	M	0:01:53.582-0:01:53.848	BL	0.078884	8	0.295519
Trial 1	1.3	Rep	M	0:01:53.848-0:01:54.114	BL	0.107649	7	0.460888
Trial 1	1.3	Rep	M	0:01:54.114-0:01:54.380	BL	0.112522	8	0.421534
Trial 1	1.3	Rep	M	0:01:54.380-0:01:54.646	BL	0.0795115	8	0.29787
Trial 1	1.3	Rep	M	0:01:54.646-0:01:54.912	BL	0.234962	8	0.880223
Trial 1	1.3	Rep	M	0:01:54.912-0:01:55.178	BL	0.128832	8	0.482638
Trial 1	1.3	Rep	M	0:01:55.178-0:01:55.444	BL	0.245683	8	0.920385
Trial 1	1.3	Rep	M	0:01:55.444-0:01:55.710	BL	0.306281	8	1.14741
Trial 1	1.3	Rep	M	0:01:55.710-0:01:55.976	BL	0.221547	8	0.829971
Trial 1	1.3	Rep	M	0:01:55.976-0:01:56.242	BL	0.163663	8	0.61312
Trial 1	1.3	Rep	M	0:01:56.242-0:01:56.508	BL	0.0946234	8	0.354482
Trial 1	1.3	Rep	M	0:01:56.508-0:01:56.774	BL	0.14825	8	0.555385
Trial 1	1.3	Rep	M	0:01:56.774-0:01:57.040	BL	0.0510291	8	0.191169
Trial 1	1.3	Rep	M	0:01:57.040-0:01:57.306	BL	0.192654	8	0.721727
Trial 1	1.3	Rep	M	0:01:57.306-0:01:57.572	BL	0.0862514	8	0.32312
Trial 1	1.3	Rep	M	0:01:57.572-0:01:57.838	BL	0.124967	8	0.468159
Trial 1	1.3	Rep	M	0:01:57.838-0:01:58.104	BL	0.184923	8	0.692766
Trial 1	1.3	Rep	M	0:01:58.104-0:01:58.370	BL	0.140377	8	0.525889
Trial 1	1.3	Rep	M	0:01:58.370-0:01:58.636	BL	0.11892	8	0.445503
Trial 1	1.3	Rep	M	0:01:58.636-0:01:58.902	BL	0.144697	8	0.54207
Trial 1	1.3	Rep	M	0:01:58.902-0:01:59.168	BL	0.121151	8	0.453867
Trial 1	1.3	Rep	M	0:01:59.168-0:01:59.434	BL	0.0653617	8	0.24486
Trial 1	1.3	Rep	M	0:01:59.434-0:01:59.700	BL	0.111981	8	0.419505
Trial 1	1.3	Rep	M	0:01:59.700-0:01:59.966	BL	0.136007	8	0.509515
Trial 1	1.3	Rep	M	0:01:59.966-0:02:00.232	BL	0.139381	8	0.522154
Trial 1	1.3	Rep	M	0:02:00.232-0:02:00.498	BL	0.119078	8	0.446095
Trial 1	1.3	Rep	M	0:02:00.498-0:02:00.764	BL	0.204495	8	0.766088
Trial 1	1.3	Rep	M	0:02:00.764-0:02:01.030	BL	0.269621	8	1.01007
Trial 1	1.3	Rep	M	0:02:01.030-0:02:01.296	BL	0.350243	8	1.31209
Trial 1	1.3	Rep	M	0:02:01.296-0:02:01.562	BL	0.418288	8	1.56702
Trial 1	1.3	Rep	M	0:02:01.562-0:02:01.828	BL	0.286685	8	1.074
Trial 1	1.3	Rep	M	0:02:01.828-0:02:02.094	BL	0.201718	8	0.755683
Trial 1	1.3	Rep	M	0:02:02.094-0:02:02.360	BL	0.286164	8	1.07204
Trial 1	1.3	Rep	M	0:02:02.360-0:02:02.626	BL	0.246843	8	0.924734
Trial 1	1.3	Rep	M	0:02:02.626-0:02:02.892	BL	0.121176	8	0.453957
Trial 1	1.3	Rep	M	0:02:02.892-0:02:03.158	BL	0.13241	8	0.496041
Trial 1	1.3	Rep	M	0:02:03.158-0:02:03.424	BL	0.223507	8	0.837317
Trial 1	1.3	Rep	M	0:02:03.424-0:02:03.690	BL	0.339361	7	1.45295
Trial 1	1.3	Rep	M	0:02:03.690-0:02:03.956	BL	0.260625	8	0.976369
Trial 1	1.3	Rep	M	0:02:03.956-0:02:04.222	BL	0.306681	8	1.1489
Trial 1	1.3	Rep	M	0:02:04.222-0:02:04.488	BL	0.23299	8	0.872838
Trial 1	1.3	Rep	M	0:02:04.488-0:02:04.754	BL	0.361356	8	1.35372
Trial 1	1.3	Rep	M	0:02:04.754-0:02:05.020	BL	0.265064	8	0.992989
Trial 1	1.3	Rep	M	0:02:05.020-0:02:05.286	BL	0.262251	8	0.982466
Trial 1	1.3	Rep	M	0:02:05.286-0:02:05.552	BL	0.297616	8	1.11494
Trial 1	1.3	Rep	M	0:02:05.552-0:02:05.818	BL	0.313224	8	1.17341
Trial 1	1.3	Rep	M	0:02:05.818-0:02:06.084	BL	0.23242	8	0.870702
Trial 1	1.3	Rep	M	0:02:06.084-0:02:06.350	BL	0.410358	8	1.5373
Trial 1	1.3	Rep	M	0:02:06.350-0:02:06.616	BL	0.201248	8	0.753931
Trial 1	1.3	Rep	M	0:02:06.616-0:02:06.882	BL	0.264749	8	0.991819
Trial 1	1.3	Rep	M	0:02:06.882-0:02:07.148	BL	0.225723	8	0.845612
Trial 1	1.3	Rep	M	0:02:07.148-0:02:07.414	BL	0.288144	8	1.07946
Trial 1	1.3	Rep	M	0:02:07.414-0:02:07.680	BL	0.330067	8	1.23651
Trial 1	1.3	Rep	M	0:02:07.680-0:02:07.946	BL	0.285474	8	1.06946
Trial 1	1.3	Rep	M	0:02:07.946-0:02:08.212	BL	0.273001	8	1.02273
Trial 1	1.3	Rep	M	0:02:08.212-0:02:08.478	BL	0.323795	8	1.21301
Trial 1	1.3	Rep	M	0:02:08.478-0:02:08.744	BL	0.458458	8	1.71751
Trial 1	1.3	Rep	M	0:02:08.744-0:02:09.010	BL	0.220707	8	0.826823
Trial 1	1.3	Rep	M	0:02:09.010-0:02:09.276	BL	0.782438	8	2.93122
Trial 1	1.3	Rep	M	0:02:09.276-0:02:09.542	BL	1.23765	8	4.63653
Trial 1	1.3	Rep	M	0:02:09.542-0:02:09.808	BL	0.613944	8	2.29997
Trial 1	1.3	Rep	M	0:02:09.808-0:02:10.074	BL	3.97503	8	14.8915
Trial 1	1.3	Rep	M	0:02:10.074-0:02:10.340	BL	4.44817	8	16.6639
Trial 1	1.3	Rep	M	0:02:10.340-0:02:10.606	BL	2.82489	8	10.5828
Trial 1	1.3	Rep	M	0:02:10.606-0:02:10.872	BL	0.960273	8	3.59742
Trial 1	1.3	Rep	M	0:02:10.872-0:02:11.138	BL	2.31392	8	8.66848
Trial 1	1.3	Rep	M	0:02:11.138-0:02:11.404	BL	3.02328	8	11.326
Trial 1	1.3	Rep	M	0:02:11.404-0:02:11.670	BL	1.82534	8	6.83816
Trial 1	1.3	Rep	M	0:02:11.670-0:02:11.936	BL	0.66305	8	2.48396
Trial 1	1.3	Rep	M	0:02:11.936-0:02:12.202	BL	0.586712	8	2.19797
Trial 1	1.3	Rep	M	0:02:12.202-0:02:12.468	BL	1.63608	8	6.12911
Trial 1	1.3	Rep	M	0:02:12.468-0:02:12.734	BL	0.822548	8	3.08148
Trial 1	1.3	Rep	M	0:02:12.734-0:02:13.000	BL	1.92465	8	7.21021
Trial 1	1.3	Rep	M	0:02:13.000-0:02:13.266	BL	1.55355	7	6.65143
Trial 1	1.3	Rep	M	0:02:13.266-0:02:13.532	BL	0.250181	8	0.937242
Trial 1	1.3	Rep	M	0:02:13.532-0:02:13.798	BL	0.232865	8	0.872374
Trial 1	1.3	Rep	M	0:02:13.798-0:02:14.064	BL	0.264904	8	0.992401
Trial 1	1.3	Rep	M	0:02:14.064-0:02:14.330	BL	0.223215	8	0.836218
Trial 1	1.3	Rep	M	0:02:14.330-0:02:14.596	BL	0.168376	8	0.63078
Trial 1	1.3	Rep	M	0:02:14.596-0:02:14.862	BL	0.210483	8	0.788524
Trial 1	1.3	Rep	M	0:02:14.862-0:02:15.128	BL	0.241272	8	0.903864
Trial 1	1.3	Rep	M	0:02:15.128-0:02:15.394	BL	0.273919	8	1.02617
Trial 1	1.3	Rep	M	0:02:15.394-0:02:15.660	BL	0.299883	8	1.12344
Trial 1	1.3	Rep	M	0:02:15.660-0:02:15.926	BL	0.395084	8	1.48008
Trial 1	1.3	Rep	M	0:02:15.926-0:02:16.192	BL	0.452128	8	1.69379
Trial 1	1.3	Rep	M	0:02:16.192-0:02:16.458	BL	0.759481	8	2.8452
Trial 1	1.3	Rep	M	0:02:16.458-0:02:16.724	BL	0.388471	8	1.45532
Trial 1	1.3	Rep	M	0:02:16.724-0:02:16.990	BL	0.27372	8	1.02542
Trial 1	1.3	Rep	M	0:02:16.990-0:02:17.256	BL	0.472969	8	1.77185
Trial 1	1.3	Rep	M	0:02:17.256-0:02:17.522	BL	0.705664	8	2.64359
Trial 1	1.3	Rep	M	0:02:17.522-0:02:17.788	BL	0.324809	8	1.21681
Trial 1	1.3	Rep	M	0:02:17.788-0:02:18.054	BL	0.115551	8	0.43288
Trial 1	1.3	Rep	M	0:02:18.054-0:02:18.320	BL	0.315669	8	1.18257
Trial 1	1.3	Rep	M	0:02:18.320-0:02:18.586	BL	0.390129	8	1.46152
Trial 1	1.3	Rep	M	0:02:18.586-0:02:18.852	BL	1.4621	8	5.47743
Trial 1	1.3	Rep	M	0:02:18.852-0:02:19.118	BL	1.61955	8	6.06721
Trial 1	1.3	Rep	M	0:02:19.118-0:02:19.384	BL	0.702911	8	2.63328
Trial 1	1.3	Rep	M	0:02:19.384-0:02:19.650	BL	0.831669	8	3.11566
Trial 1	1.3	Rep	M	0:02:19.650-0:02:19.916	BL	0.384371	8	1.43995
Trial 1	1.3	Rep	M	0:02:19.916-0:02:20.182	BL	0.30203	8	1.13148
Trial 1	1.3	Rep	M	0:02:20.182-0:02:20.448	BL	0.226877	8	0.84994
Trial 1	1.3	Rep	M	0:02:20.448-0:02:20.714	BL	0.282502	8	1.05833
Trial 1	1.3	Rep	M	0:02:20.714-0:02:20.980	BL	1.85905	8	6.96446
Trial 1	1.3	Rep	M	0:02:20.980-0:02:21.246	BL	2.77915	8	10.4114
Trial 1	1.3	Rep	M	0:02:21.246-0:02:21.512	BL	2.30098	8	8.62008
Trial 1	1.3	Rep	M	0:02:21.512-0:02:21.778	BL	2.54316	8	9.52732
Trial 1	1.3	Rep	M	0:02:21.778-0:02:22.044	BL	2.46223	8	9.22414
Trial 1	1.3	Rep	M	0:02:22.044-0:02:22.310	BL	1.71551	8	6.42669
Trial 1	1.3	Rep	M	0:02:22.310-0:02:22.576	BL	0.322791	8	1.20925
Trial 1	1.3	Rep	M	0:02:22.576-0:02:22.842	BL	0.249492	7	1.06818
Trial 1	1.3	Rep	M	0:02:22.842-0:02:23.108	BL	0.284703	8	1.06657
Trial 1	1.3	Rep	M	0:02:23.108-0:02:23.374	BL	0.449887	8	1.68538
Trial 1	1.3	Rep	M	0:02:23.374-0:02:23.640	BL	0.168656	8	0.631827
Trial 1	1.3	Rep	M	0:02:23.640-0:02:23.906	BL	0.427283	8	1.60071
Trial 1	1.3	Rep	M	0:02:23.906-0:02:24.172	BL	0.435105	8	1.63001
Trial 1	1.3	Rep	M	0:02:24.172-0:02:24.438	BL	0.384171	8	1.4392
Trial 1	1.3	Rep	M	0:02:24.438-0:02:24.704	BL	0.376112	8	1.40901
Trial 1	1.3	Rep	M	0:02:24.704-0:02:24.970	BL	0.1733	8	0.649229
Trial 1	1.3	Rep	M	0:02:24.970-0:02:25.236	BL	0.13976	8	0.523576
Trial 1	1.3	Rep	M	0:02:25.236-0:02:25.502	BL	0.440657	8	1.65081
Trial 1	1.3	Rep	M	0:02:25.502-0:02:25.768	BL	0.484698	8	1.8158
Trial 1	1.3	Rep	M	0:02:25.768-0:02:26.034	BL	1.72918	8	6.47794
Trial 1	1.3	Rep	M	0:02:26.034-0:02:26.300	BL	2.65571	8	9.94898
Trial 1	1.3	Rep	M	0:02:26.300-0:02:26.566	BL	3.8424	8	14.3946
Trial 1	1.3	Rep	M	0:02:26.566-0:02:26.832	BL	3.97273	8	14.8828
Trial 1	1.3	Rep	M	0:02:26.832-0:02:27.098	BL	2.19104	8	8.20822
Trial 1	1.3	Rep	M	0:02:27.098-0:02:27.364	BL	0.322709	8	1.20895
Trial 1	1.3	Rep	M	0:02:27.364-0:02:27.630	BL	0.363275	8	1.36092
Trial 1	1.3	Rep	M	0:02:27.630-0:02:27.896	BL	0.564632	8	2.11524
Trial 1	1.3	Rep	M	0:02:27.896-0:02:28.162	BL	0.316197	8	1.18456
Trial 1	1.3	Rep	M	0:02:28.162-0:02:28.428	BL	0.614052	8	2.30039
Trial 1	1.3	Rep	M	0:02:28.428-0:02:28.694	BL	0.972095	8	3.64171
Trial 1	1.3	Rep	M	0:02:28.694-0:02:28.960	BL	0.200308	8	0.750407
Trial 1	1.3	Rep	M	0:02:28.960-0:02:29.226	BL	0.211573	8	0.792602
Trial 1	1.3	Rep	M	0:02:29.226-0:02:29.492	BL	0.130126	8	0.487486
Trial 1	1.3	Rep	M	0:02:29.492-0:02:29.758	BL	0.230416	8	0.863197
Trial 1	1.3	Rep	M	0:02:29.758-0:02:30.024	BL	0.228183	8	0.854829
Trial 1	1.3	Rep	M	0:02:30.024-0:02:30.290	BL	0.174016	8	0.651906
Trial 1	1.3	Rep	M	0:02:30.290-0:02:30.556	BL	0.228634	8	0.85652
Trial 1	1.3	Rep	M	0:02:30.556-0:02:30.822	BL	0.267254	8	1.0012
Trial 1	1.3	Rep	M	0:02:30.822-0:02:31.088	BL	0.0954974	8	0.357758
Trial 1	1.3	Rep	M	0:02:31.088-0:02:31.354	BL	0.11502	8	0.430892
Trial 1	1.3	Rep	M	0:02:31.354-0:02:31.620	BL	0.183683	8	0.688124
Trial 1	1.3	Rep	M	0:02:31.620-0:02:31.886	BL	0.170676	8	0.639392
Trial 1	1.3	Rep	M	0:02:31.886-0:02:32.152	BL	0.201219	7	0.861509
Trial 1	1.3	Rep	M	0:02:32.152-0:02:32.418	BL	0.167624	8	0.627966
Trial 1	1.3	Rep	M	0:02:32.418-0:02:32.684	BL	0.26002	8	0.974096
Trial 1	1.3	Rep	M	0:02:32.684-0:02:32.950	BL	0.13702	8	0.513308
Trial 1	1.3	Rep	M	0:02:32.950-0:02:33.216	BL	0.246526	8	0.923545
Trial 1	1.3	Rep	M	0:02:33.216-0:02:33.482	BL	0.341982	8	1.28114
Trial 1	1.3	Rep	M	0:02:33.482-0:02:33.748	BL	0.202903	8	0.760127
Trial 1	1.3	Rep	M	0:02:33.748-0:02:34.014	BL	0.320934	8	1.20229
Trial 1	1.3	Rep	M	0:02:34.014-0:02:34.280	BL	0.19533	8	0.731751
Trial 1	1.3	Rep	M	0:02:34.280-0:02:34.546	BL	0.25951	8	0.972189
Trial 1	1.3	Rep	M	0:02:34.546-0:02:34.812	BL	0.198344	8	0.743044
Trial 1	1.3	Rep	M	0:02:34.812-0:02:35.078	BL	0.149619	8	0.560513
Trial 1	1.3	Rep	M	0:02:35.078-0:02:35.344	BL	0.208268	8	0.780222
Trial 1	1.3	Rep	M	0:02:35.344-0:02:35.610	BL	0.161414	8	0.604694
Trial 1	1.3	Rep	M	0:02:35.610-0:02:35.876	BL	0.216934	8	0.812689
Trial 1	1.3	Rep	M	0:02:35.876-0:02:36.142	BL	0.201028	8	0.753101
Trial 1	1.3	Rep	M	0:02:36.142-0:02:36.408	BL	0.294666	8	1.1039
Trial 1	1.3	Rep	M	0:02:36.408-0:02:36.674	BL	0.277153	8	1.03828
Trial 1	1.3	Rep	M	0:02:36.674-0:02:36.940	BL	0.209405	8	0.784477
Trial 1	1.3	Rep	M	0:02:36.940-0:02:37.206	BL	0.133602	8	0.500505
Trial 1	1.3	Rep	M	0:02:37.206-0:02:37.472	BL	0.16241	8	0.608426
Trial 1	1.3	Rep	M	0:02:37.472-0:02:37.738	BL	0.0833516	8	0.312259
Trial 1	1.3	Rep	M	0:02:37.738-0:02:38.004	BL	0.097114	8	0.363814
Trial 1	1.3	Rep	M	0:02:38.004-0:02:38.270	BL	0.0958517	8	0.359084
Trial 1	1.3	Rep	M	0:02:38.270-0:02:38.536	BL	0.0454257	8	0.170178
Trial 1	1.3	Rep	M	0:02:38.536-0:02:38.802	BL	0.0656061	8	0.245776
Trial 1	1.3	Rep	M	0:02:38.802-0:02:39.068	BL	0.0580923	8	0.217629
Trial 1	1.3	Rep	M	0:02:39.068-0:02:39.334	BL	0.122972	8	0.460684
Trial 1	1.3	Rep	M	0:02:39.334-0:02:39.600	BL	0.092616	8	0.346963
Trial 1	1.3	Rep	M	0:02:39.600-0:02:39.866	BL	0.0948738	8	0.355421
Trial 1	1.3	Rep	M	0:02:39.866-0:02:40.132	BL	0.0542791	8	0.203343
Trial 1	1.3	Rep	M	0:02:40.132-0:02:40.398	BL	0.0880902	8	0.330009
Trial 1	1.3	Rep	M	0:02:40.398-0:02:40.664	BL	0.176503	8	0.661224
Trial 1	1.3	Rep	M	0:02:40.664-0:02:40.930	BL	0.337244	8	1.2634
Trial 1	1.3	Rep	M	0:02:40.930-0:02:41.196	BL	0.356376	8	1.33508
Trial 1	1.3	Rep	M	0:02:41.196-0:02:41.462	BL	0.329583	8	1.23471
Trial 1	1.3	Rep	M	0:02:41.462-0:02:41.728	BL	0.172681	7	0.739323
Trial 1	1.3	Rep	M	0:02:41.728-0:02:41.994	BL	0.060131	8	0.225266
Trial 1	1.3	Rep	M	0:02:41.994-0:02:42.260	BL	0.0953176	8	0.357084
Trial 1	1.3	Rep	M	0:02:42.260-0:02:42.526	BL	0.119424	8	0.447389
Trial 1	1.3	Rep	M	0:02:42.526-0:02:42.792	BL	0.171307	8	0.641753
Trial 1	1.3	Rep	M	0:02:42.792-0:02:43.058	BL	0.207737	8	0.778234
Trial 1	1.3	Rep	M	0:02:43.058-0:02:43.324	BL	0.282995	8	1.06017
Trial 1	1.3	Rep	M	0:02:43.324-0:02:43.590	BL	0.148906	8	0.557837
Trial 1	1.3	Rep	M	0:02:43.590-0:02:43.856	BL	0.142121	8	0.53242
Trial 1	1.3	Rep	M	0:02:43.856-0:02:44.122	BL	0.136743	8	0.512276
Trial 1	1.3	Rep	M	0:02:44.122-0:02:44.388	BL	0.205459	8	0.769695
Trial 1	1.3	Rep	M	0:02:44.388-0:02:44.654	BL	0.128773	8	0.482418
Trial 1	1.3	Rep	M	0:02:44.654-0:02:44.920	BL	0.0457502	8	0.171392
Trial 1	1.3	Rep	M	0:02:44.920-0:02:45.186	BL	0.0883638	8	0.331032
Trial 1	1.3	Rep	M	0:02:45.186-0:02:45.452	BL	0.193621	8	0.725354
Trial 1	1.3	Rep	M	0:02:45.452-0:02:45.718	BL	0.0651039	8	0.243896
Trial 1	1.3	Rep	M	0:02:45.718-0:02:45.984	BL	0.130694	8	0.489613
Trial 1	1.3	Rep	M	0:02:45.984-0:02:46.250	BL	0.107587	8	0.403047
Trial 1	1.3	Rep	M	0:02:46.250-0:02:46.516	BL	0.122247	8	0.457967
Trial 1	1.3	Rep	M	0:02:46.516-0:02:46.782	BL	0.0719197	8	0.269429
Trial 1	1.3	Rep	M	0:02:46.782-0:02:47.048	BL	0.0990149	8	0.370936
Trial 1	1.3	Rep	M	0:02:47.048-0:02:47.314	BL	0.15988	8	0.598947
Trial 1	1.3	Rep	M	0:02:47.314-0:02:47.580	BL	0.154736	8	0.579675
Trial 1	1.3	Rep	M	0:02:47.580-0:02:47.846	BL	0.298941	8	1.1199
Trial 1	1.3	Rep	M	0:02:47.846-0:02:48.112	BL	0.265153	8	0.993327
Trial 1	1.3	Rep	M	0:02:48.112-0:02:48.378	BL	0.140343	8	0.525758
Trial 1	1.3	Rep	M	0:02:48.378-0:02:48.644	BL	0.0448663	8	0.16808
Trial 1	1.3	Rep	M	0:02:48.644-0:02:48.910	BL	0.0865516	8	0.324242
Trial 1	1.3	Rep	M	0:02:48.910-0:02:49.176	BL	0.125125	8	0.468747
Trial 1	1.3	Rep	M	0:02:49.176-0:02:49.442	BL	0.17598	8	0.659268
Trial 1	1.3	Rep	M	0:02:49.442-0:02:49.708	BL	0.286143	8	1.07196
Trial 1	1.3	Rep	M	0:02:49.708-0:02:49.974	BL	0.381564	8	1.42945
Trial 1	1.3	Rep	M	0:02:49.974-0:02:50.240	BL	0.266725	8	0.999215
Trial 1	1.3	Rep	M	0:02:50.240-0:02:50.506	BL	0.109894	8	0.411688
Trial 1	1.3	Rep	M	0:02:50.506-0:02:50.772	BL	0.158485	8	0.593724
Trial 1	1.3	Rep	M	0:02:50.772-0:02:51.038	BL	0.179657	8	0.673039
Trial 1	1.3	Rep	M	0:02:51.038-0:02:51.304	BL	0.149339	7	0.639382
Trial 1	1.3	Rep	M	0:02:51.304-0:02:51.570	BL	0.130642	8	0.489416
Trial 1	1.3	Rep	M	0:02:51.570-0:02:51.836	BL	0.100923	8	0.378081
Trial 1	1.3	Rep	M	0:02:51.836-0:02:52.102	BL	0.0894543	8	0.335118
Trial 1	1.3	Rep	M	0:02:52.102-0:02:52.368	BL	0.148209	8	0.555227
Trial 1	1.3	Rep	M	0:02:52.368-0:02:52.634	BL	0.113334	8	0.424576
Trial 1	1.3	Rep	M	0:02:52.634-0:02:52.900	BL	0.0949026	8	0.35553
Trial 1	1.3	Rep	M	0:02:52.900-0:02:53.166	BL	0.14923	8	0.559053
Trial 1	1.3	Rep	M	0:02:53.166-0:02:53.432	BL	0.0467267	8	0.17505
Trial 1	1.3	Rep	M	0:02:53.432-0:02:53.698	BL	0.285644	8	1.07009
Trial 1	1.3	Rep	M	0:02:53.698-0:02:53.964	BL	0.193251	8	0.723961
Trial 1	1.3	Rep	M	0:02:53.964-0:02:54.230	BL	0.111175	8	0.416494
Trial 1	1.3	Rep	M	0:02:54.230-0:02:54.496	BL	0.0958079	8	0.358919
Trial 1	1.3	Rep	M	0:02:54.496-0:02:54.762	BL	0.0874025	8	0.327432
Trial 1	1.3	Rep	M	0:02:54.762-0:02:55.028	BL	0.140855	8	0.527677
Trial 1	1.3	Rep	M	0:02:55.028-0:02:55.294	BL	0.0835761	8	0.313096
Trial 1	1.3	Rep	M	0:02:55.294-0:02:55.560	BL	0.111551	8	0.4179
Trial 1	1.3	Rep	M	0:02:55.560-0:02:55.826	BL	0.0742039	8	0.277986
Trial 1	1.3	Rep	M	0:02:55.826-0:02:56.092	BL	0.108296	8	0.405704
Trial 1	1.3	Rep	M	0:02:56.092-0:02:56.358	BL	0.0700636	8	0.262475
Trial 1	1.3	Rep	M	0:02:56.358-0:02:56.624	BL	0.106581	8	0.399279
Trial 1	1.3	Rep	M	0:02:56.624-0:02:56.890	BL	0.0987027	8	0.369768
Trial 1	1.3	Rep	M	0:02:56.890-0:02:57.156	BL	0.0757091	8	0.283626
Trial 1	1.3	Rep	M	0:02:57.156-0:02:57.422	BL	0.0654869	8	0.245331
Trial 1	1.3	Rep	M	0:02:57.422-0:02:57.688	BL	0.0740489	8	0.277404
Trial 1	1.3	Rep	M	0:02:57.688-0:02:57.954	BL	0.16591	8	0.621535
Trial 1	1.3	Rep	M	0:02:57.954-0:02:58.220	BL	0.0422384	8	0.158236
Trial 1	1.3	Rep	M	0:02:58.220-0:02:58.486	BL	0.0610853	8	0.22884
Trial 1	1.3	Rep	M	0:02:58.486-0:02:58.752	BL	0.0610946	8	0.228877
Trial 1	1.3	Rep	M	0:02:58.752-0:02:59.018	BL	0.111722	8	0.418538
Trial 1	1.3	Rep	M	0:02:59.018-0:02:59.284	BL	0.134751	8	0.50481
Trial 1	1.3	Rep	M	0:02:59.284-0:02:59.550	BL	0.0487513	8	0.182635
Trial 1	1.3	Rep	M	0:02:59.550-0:02:59.816	BL	0.097239	8	0.364283
Trial 1	1.3	Rep	M	0:02:59.816-0:03:00.082	BL	0.118424	8	0.443648
Trial 1	1.3	Rep	M	0:03:00.082-0:03:00.348	CS1a	0.278847	8	1.04463
Trial 1	1.3	Rep	M	0:03:00.348-0:03:00.614	CS1a	0.112898	8	0.422942
Trial 1	1.3	Rep	M	0:03:00.614-0:03:00.880	CS1a	0.252545	7	1.08125
Trial 1	1.3	Rep	M	0:03:00.880-0:03:01.146	CS1a	0.04013	8	0.150337
Trial 1	1.3	Rep	M	0:03:01.146-0:03:01.412	CS1a	0.0609172	8	0.228211
Trial 1	1.3	Rep	M	0:03:01.412-0:03:01.678	CS1a	0.126336	8	0.47329
Trial 1	1.3	Rep	M	0:03:01.678-0:03:01.944	CS1a	0.0332205	8	0.124453
Trial 1	1.3	Rep	M	0:03:01.944-0:03:02.210	CS1a	0.335415	8	1.25655
Trial 1	1.3	Rep	M	0:03:02.210-0:03:02.476	CS1a	0.179997	8	0.674316
Trial 1	1.3	Rep	M	0:03:02.476-0:03:02.742	CS1a	0.121523	8	0.455252
Trial 1	1.3	Rep	M	0:03:02.742-0:03:03.008	CS1a	0.0377498	8	0.14142
Trial 1	1.3	Rep	M	0:03:03.008-0:03:03.274	CS1a	0.155863	8	0.583902
Trial 1	1.3	Rep	M	0:03:03.274-0:03:03.540	CS1a	0.0428111	8	0.16038
Trial 1	1.3	Rep	M	0:03:03.540-0:03:03.806	CS1a	0.0630932	8	0.236362
Trial 1	1.3	Rep	M	0:03:03.806-0:03:04.072	CS1a	0.0947759	8	0.355053
Trial 1	1.3	Rep	M	0:03:04.072-0:03:04.338	CS1a	0.0695442	8	0.260532
Trial 1	1.3	Rep	M	0:03:04.338-0:03:04.604	CS1a	0.0859386	8	0.321946
Trial 1	1.3	Rep	M	0:03:04.604-0:03:04.870	CS1a	0.0439409	8	0.164612
Trial 1	1.3	Rep	M	0:03:04.870-0:03:05.136	CS1a	0.188076	8	0.704583
Trial 1	1.3	Rep	M	0:03:05.136-0:03:05.402	CS1a	0.0718738	8	0.269259
Trial 1	1.3	Rep	M	0:03:05.402-0:03:05.668	CS1a	0.201182	8	0.753681
Trial 1	1.3	Rep	M	0:03:05.668-0:03:05.934	CS1a	0.0665744	8	0.249403
Trial 1	1.3	Rep	M	0:03:05.934-0:03:06.200	CS1a	0.081491	8	0.305284
Trial 1	1.3	Rep	M	0:03:06.200-0:03:06.466	CS1a	0.0994123	8	0.372425
Trial 1	1.3	Rep	M	0:03:06.466-0:03:06.732	CS1a	0.0806307	8	0.302062
Trial 1	1.3	Rep	M	0:03:06.732-0:03:06.998	CS1a	0.139628	8	0.523078
Trial 1	1.3	Rep	M	0:03:06.998-0:03:07.264	CS1a	0.0761021	8	0.285096
Trial 1	1.3	Rep	M	0:03:07.264-0:03:07.530	CS1a	0.138699	8	0.519599
Trial 1	1.3	Rep	M	0:03:07.530-0:03:07.796	CS1a	0.147459	8	0.552423
Trial 1	1.3	Rep	M	0:03:07.796-0:03:08.062	CS1a	0.28521	8	1.06846
Trial 1	1.3	Rep	M	0:03:08.062-0:03:08.328	CS1a	0.400995	8	1.50223
Trial 1	1.3	Rep	M	0:03:08.328-0:03:08.594	CS1a	0.326031	8	1.22139
Trial 1	1.3	Rep	M	0:03:08.594-0:03:08.860	CS1a	0.727311	8	2.72469
Trial 1	1.3	Rep	M	0:03:08.860-0:03:09.126	CS1a	1.38282	8	5.1804
Trial 1	1.3	Rep	M	0:03:09.126-0:03:09.392	CS1a	2.45912	8	9.21247
Trial 1	1.3	Rep	M	0:03:09.392-0:03:09.658	CS1a	4.54391	8	17.0227
Trial 1	1.3	Rep	M	0:03:09.658-0:03:09.924	CS1a	4.53408	8	16.9858
Trial 1	1.3	Rep	M	0:03:09.924-0:03:10.190	CS1a	2.94572	7	12.6119
Trial 1	1.3	Rep	M	0:03:10.190-0:03:10.456	CS1b	2.30477	8	8.63426
Trial 1	1.3	Rep	M	0:03:10.456-0:03:10.722	CS1b	4.4116	8	16.5269
Trial 1	1.3	Rep	M	0:03:10.722-0:03:10.988	CS1b	2.28182	8	8.54826
Trial 1	1.3	Rep	M	0:03:10.988-0:03:11.254	CS1b	0.578683	8	2.16789
Trial 1	1.3	Rep	M	0:03:11.254-0:03:11.520	CS1b	0.270031	8	1.0116
Trial 1	1.3	Rep	M	0:03:11.520-0:03:11.786	CS1b	0.291629	8	1.09251
Trial 1	1.3	Rep	M	0:03:11.786-0:03:12.052	CS1b	0.0945797	8	0.354318
Trial 1	1.3	Rep	M	0:03:12.052-0:03:12.318	CS1b	0.164954	8	0.617955
Trial 1	1.3	Rep	M	0:03:12.318-0:03:12.584	CS1b	0.160351	8	0.600719
Trial 1	1.3	Rep	M	0:03:12.584-0:03:12.850	CS1b	0.100931	8	0.378112
Trial 1	1.3	Rep	M	0:03:12.850-0:03:13.116	CS1b	3.45079	8	12.9276
Trial 1	1.3	Rep	M	0:03:13.116-0:03:13.382	CS1b	7.04455	8	26.3906
Trial 1	1.3	Rep	M	0:03:13.382-0:03:13.648	CS1b	6.53874	8	24.4957
Trial 1	1.3	Rep	M	0:03:13.648-0:03:13.914	CS1b	3.46123	8	12.9667
Trial 1	1.3	Rep	M	0:03:13.914-0:03:14.180	CS1b	1.7656	8	6.61437
Trial 1	1.3	Rep	M	0:03:14.180-0:03:14.446	CS1b	0.295989	8	1.10885
Trial 1	1.3	Rep	M	0:03:14.446-0:03:14.712	CS1b	0.187902	8	0.703927
Trial 1	1.3	Rep	M	0:03:14.712-0:03:14.978	CS1b	0.106568	8	0.39923
Trial 1	1.3	Rep	M	0:03:14.978-0:03:15.244	CS1b	0.114387	8	0.428522
Trial 1	1.3	Rep	M	0:03:15.244-0:03:15.510	CS1b	0.148963	8	0.55805
Trial 1	1.3	Rep	M	0:03:15.510-0:03:15.776	CS1b	0.156918	8	0.587858
Trial 1	1.3	Rep	M	0:03:15.776-0:03:16.042	CS1b	0.115882	8	0.434125
Trial 1	1.3	Rep	M	0:03:16.042-0:03:16.308	CS1b	0.103925	8	0.389328
Trial 1	1.3	Rep	M	0:03:16.308-0:03:16.574	CS1b	0.153722	8	0.575882
Trial 1	1.3	Rep	M	0:03:16.574-0:03:16.840	CS1b	0.0928337	8	0.347777
Trial 1	1.3	Rep	M	0:03:16.840-0:03:17.106	CS1b	0.0820867	8	0.30752
Trial 1	1.3	Rep	M	0:03:17.106-0:03:17.372	CS1b	0.0885711	8	0.331808
Trial 1	1.3	Rep	M	0:03:17.372-0:03:17.638	CS1b	0.0894623	8	0.335147
Trial 1	1.3	Rep	M	0:03:17.638-0:03:17.904	CS1b	0.312376	8	1.17025
Trial 1	1.3	Rep	M	0:03:17.904-0:03:18.170	CS1b	2.60694	8	9.76624
Trial 1	1.3	Rep	M	0:03:18.170-0:03:18.436	CS1b	7.81368	8	29.2721
Trial 1	1.3	Rep	M	0:03:18.436-0:03:18.702	CS1b	6.21479	8	23.2821
Trial 1	1.3	Rep	M	0:03:18.702-0:03:18.968	CS1b	4.21683	8	15.7973
Trial 1	1.3	Rep	M	0:03:18.968-0:03:19.234	CS1b	1.92194	8	7.2001
Trial 1	1.3	Rep	M	0:03:19.234-0:03:19.500	CS1b	0.284302	8	1.06507
Trial 1	1.3	Rep	M	0:03:19.500-0:03:19.766	CS1b	0.107445	7	0.460017
Trial 1	1.3	Rep	M	0:03:19.766-0:03:20.032	CS1b	0.16732	8	0.626826
Trial 1	1.3	Rep	M	0:03:20.032-0:03:20.298	IT1	0.172579	8	0.646525
Trial 1	1.3	Rep	M	0:03:20.298-0:03:20.564	IT1	0.241543	8	0.904881
Trial 1	1.3	Rep	M	0:03:20.564-0:03:20.830	IT1	0.119193	8	0.446528
Trial 1	1.3	Rep	M	0:03:20.830-0:03:21.096	IT1	0.0530205	8	0.198628
Trial 1	1.3	Rep	M	0:03:21.096-0:03:21.362	IT1	0.128866	8	0.482763
Trial 1	1.3	Rep	M	0:03:21.362-0:03:21.628	IT1	0.10943	8	0.409953
Trial 1	1.3	Rep	M	0:03:21.628-0:03:21.894	IT1	0.189038	8	0.708183
Trial 1	1.3	Rep	M	0:03:21.894-0:03:22.160	IT1	0.132519	8	0.496451
Trial 1	1.3	Rep	M	0:03:22.160-0:03:22.426	IT1	0.157824	8	0.591247
Trial 1	1.3	Rep	M	0:03:22.426-0:03:22.692	IT1	0.186028	8	0.696908
Trial 1	1.3	Rep	M	0:03:22.692-0:03:22.958	IT1	0.0777446	8	0.291249
Trial 1	1.3	Rep	M	0:03:22.958-0:03:23.224	IT1	0.164497	8	0.616249
Trial 1	1.3	Rep	M	0:03:23.224-0:03:23.490	IT1	0.0943091	8	0.353305
Trial 1	1.3	Rep	M	0:03:23.490-0:03:23.756	IT1	0.15932	8	0.596853
Trial 1	1.3	Rep	M	0:03:23.756-0:03:24.022	IT1	0.074055	8	0.277429
Trial 1	1.3	Rep	M	0:03:24.022-0:03:24.288	IT1	0.0596186	8	0.223345
Trial 1	1.3	Rep	M	0:03:24.288-0:03:24.554	IT1	0.0632328	8	0.236885
Trial 1	1.3	Rep	M	0:03:24.554-0:03:24.820	IT1	0.125746	8	0.471074
Trial 1	1.3	Rep	M	0:03:24.820-0:03:25.086	IT1	0.0812997	8	0.304568
Trial 1	1.3	Rep	M	0:03:25.086-0:03:25.352	IT1	0.106108	8	0.39751
Trial 1	1.3	Rep	M	0:03:25.352-0:03:25.618	IT1	0.120176	8	0.450209
Trial 1	1.3	Rep	M	0:03:25.618-0:03:25.884	IT1	0.107206	8	0.401621
Trial 1	1.3	Rep	M	0:03:25.884-0:03:26.150	IT1	0.159603	8	0.597913
Trial 1	1.3	Rep	M	0:03:26.150-0:03:26.416	IT1	0.0866218	8	0.324506
Trial 1	1.3	Rep	M	0:03:26.416-0:03:26.682	IT1	0.205388	8	0.769435
Trial 1	1.3	Rep	M	0:03:26.682-0:03:26.948	IT1	0.0863567	8	0.323513
Trial 1	1.3	Rep	M	0:03:26.948-0:03:27.214	IT1	0.0805133	8	0.301623
Trial 1	1.3	Rep	M	0:03:27.214-0:03:27.480	IT1	0.124907	8	0.467933
Trial 1	1.3	Rep	M	0:03:27.480-0:03:27.746	IT1	0.1178	8	0.44131
Trial 1	1.3	Rep	M	0:03:27.746-0:03:28.012	IT1	0.0897286	8	0.336148
Trial 1	1.3	Rep	M	0:03:28.012-0:03:28.278	IT1	0.165099	8	0.618501
Trial 1	1.3	Rep	M	0:03:28.278-0:03:28.544	IT1	0.171755	8	0.643436
Trial 1	1.3	Rep	M	0:03:28.544-0:03:28.810	IT1	0.115658	8	0.433286
Trial 1	1.3	Rep	M	0:03:28.810-0:03:29.076	IT1	0.0893095	8	0.334576
Trial 1	1.3	Rep	M	0:03:29.076-0:03:29.342	IT1	0.0729472	7	0.312317
Trial 1	1.3	Rep	M	0:03:29.342-0:03:29.608	IT1	0.0701599	8	0.262836
Trial 1	1.3	Rep	M	0:03:29.608-0:03:29.874	IT1	0.16653	8	0.62386
Trial 1	1.3	Rep	M	0:03:29.874-0:03:30.140	IT1	0.110432	8	0.413708
Trial 1	1.3	Rep	M	0:03:30.140-0:03:30.406	IT1	0.245531	8	0.91982
Trial 1	1.3	Rep	M	0:03:30.406-0:03:30.672	IT1	0.139928	8	0.524204
Trial 1	1.3	Rep	M	0:03:30.672-0:03:30.938	IT1	0.220039	8	0.824322
Trial 1	1.3	Rep	M	0:03:30.938-0:03:31.204	IT1	0.0904585	8	0.338879
Trial 1	1.3	Rep	M	0:03:31.204-0:03:31.470	IT1	0.0674742	8	0.252776
Trial 1	1.3	Rep	M	0:03:31.470-0:03:31.736	IT1	0.0691797	8	0.259163
Trial 1	1.3	Rep	M	0:03:31.736-0:03:32.002	IT1	0.0950077	8	0.35592
Trial 1	1.3	Rep	M	0:03:32.002-0:03:32.268	IT1	0.154584	8	0.579114
Trial 1	1.3	Rep	M	0:03:32.268-0:03:32.534	IT1	0.0742363	8	0.278107
Trial 1	1.3	Rep	M	0:03:32.534-0:03:32.800	IT1	0.145889	8	0.546536
Trial 1	1.3	Rep	M	0:03:32.800-0:03:33.066	IT1	0.130805	8	0.490026
Trial 1	1.3	Rep	M	0:03:33.066-0:03:33.332	IT1	0.141968	8	0.531848
Trial 1	1.3	Rep	M	0:03:33.332-0:03:33.598	IT1	0.0605901	8	0.226985
Trial 1	1.3	Rep	M	0:03:33.598-0:03:33.864	IT1	0.0846588	8	0.317152
Trial 1	1.3	Rep	M	0:03:33.864-0:03:34.130	IT1	0.0988779	8	0.370422
Trial 1	1.3	Rep	M	0:03:34.130-0:03:34.396	IT1	0.0571837	8	0.214225
Trial 1	1.3	Rep	M	0:03:34.396-0:03:34.662	IT1	0.159711	8	0.598318
Trial 1	1.3	Rep	M	0:03:34.662-0:03:34.928	IT1	0.0514182	8	0.192626
Trial 1	1.3	Rep	M	0:03:34.928-0:03:35.194	IT1	0.184	8	0.689314
Trial 1	1.3	Rep	M	0:03:35.194-0:03:35.460	IT1	0.0655498	8	0.245566
Trial 1	1.3	Rep	M	0:03:35.460-0:03:35.726	IT1	0.141797	8	0.531206
Trial 1	1.3	Rep	M	0:03:35.726-0:03:35.992	IT1	0.170837	8	0.639998
Trial 1	1.3	Rep	M	0:03:35.992-0:03:36.258	IT1	0.14962	8	0.560512
Trial 1	1.3	Rep	M	0:03:36.258-0:03:36.524	IT1	0.120992	8	0.453266
Trial 1	1.3	Rep	M	0:03:36.524-0:03:36.790	IT1	0.037959	8	0.142204
Trial 1	1.3	Rep	M	0:03:36.790-0:03:37.056	IT1	0.187045	8	0.700712
Trial 1	1.3	Rep	M	0:03:37.056-0:03:37.322	IT1	0.04881	8	0.182854
Trial 1	1.3	Rep	M	0:03:37.322-0:03:37.588	IT1	0.36823	8	1.37948
Trial 1	1.3	Rep	M	0:03:37.588-0:03:37.854	IT1	0.42854	8	1.60541
Trial 1	1.3	Rep	M	0:03:37.854-0:03:38.120	IT1	0.366285	8	1.37221
Trial 1	1.3	Rep	M	0:03:38.120-0:03:38.386	IT1	0.402854	8	1.5092
Trial 1	1.3	Rep	M	0:03:38.386-0:03:38.652	IT1	0.777006	8	2.91086
Trial 1	1.3	Rep	M	0:03:38.652-0:03:38.918	IT1	0.3674	7	1.57299
Trial 1	1.3	Rep	M	0:03:38.918-0:03:39.184	IT1	0.420081	8	1.57374
Trial 1	1.3	Rep	M	0:03:39.184-0:03:39.450	IT1	0.334277	8	1.25228
Trial 1	1.3	Rep	M	0:03:39.450-0:03:39.716	IT1	0.168677	8	0.631908
Trial 1	1.3	Rep	M	0:03:39.716-0:03:39.982	IT1	0.170631	8	0.639223
Trial 1	1.3	Rep	M	0:03:39.982-0:03:40.248	IT1	0.171803	8	0.643614
Trial 1	1.3	Rep	M	0:03:40.248-0:03:40.514	IT1	0.369319	8	1.38356
Trial 1	1.3	Rep	M	0:03:40.514-0:03:40.780	IT1	0.313362	8	1.17393
Trial 1	1.3	Rep	M	0:03:40.780-0:03:41.046	IT1	0.423976	8	1.58832
Trial 1	1.3	Rep	M	0:03:41.046-0:03:41.312	IT1	0.226387	8	0.848102
Trial 1	1.3	Rep	M	0:03:41.312-0:03:41.578	IT1	0.123002	8	0.460794
Trial 1	1.3	Rep	M	0:03:41.578-0:03:41.844	IT1	0.153248	8	0.574107
Trial 1	1.3	Rep	M	0:03:41.844-0:03:42.110	IT1	0.10139	8	0.379832
Trial 1	1.3	Rep	M	0:03:42.110-0:03:42.376	IT1	0.123254	8	0.46174
Trial 1	1.3	Rep	M	0:03:42.376-0:03:42.642	IT1	0.250727	8	0.939293
Trial 1	1.3	Rep	M	0:03:42.642-0:03:42.908	IT1	0.115676	8	0.433349
Trial 1	1.3	Rep	M	0:03:42.908-0:03:43.174	IT1	0.0867186	8	0.324871
Trial 1	1.3	Rep	M	0:03:43.174-0:03:43.440	IT1	0.104436	8	0.391243
Trial 1	1.3	Rep	M	0:03:43.440-0:03:43.706	IT1	0.068007	8	0.254771
Trial 1	1.3	Rep	M	0:03:43.706-0:03:43.972	IT1	0.27839	8	1.04291
Trial 1	1.3	Rep	M	0:03:43.972-0:03:44.238	IT1	0.346373	8	1.2976
Trial 1	1.3	Rep	M	0:03:44.238-0:03:44.504	IT1	0.321222	8	1.20338
Trial 1	1.3	Rep	M	0:03:44.504-0:03:44.770	IT1	0.270131	8	1.01197
Trial 1	1.3	Rep	M	0:03:44.770-0:03:45.036	IT1	0.121615	8	0.4556
Trial 1	1.3	Rep	M	0:03:45.036-0:03:45.302	IT1	0.217359	8	0.814279
Trial 1	1.3	Rep	M	0:03:45.302-0:03:45.568	IT1	0.198244	8	0.74267
Trial 1	1.3	Rep	M	0:03:45.568-0:03:45.834	IT1	0.138458	8	0.518699
Trial 1	1.3	Rep	M	0:03:45.834-0:03:46.100	IT1	0.0795849	8	0.298145
Trial 1	1.3	Rep	M	0:03:46.100-0:03:46.366	IT1	0.0863307	8	0.323418
Trial 1	1.3	Rep	M	0:03:46.366-0:03:46.632	IT1	0.149743	8	0.560974
Trial 1	1.3	Rep	M	0:03:46.632-0:03:46.898	IT1	0.156625	8	0.586757
Trial 1	1.3	Rep	M	0:03:46.898-0:03:47.164	IT1	0.127615	8	0.478075
Trial 1	1.3	Rep	M	0:03:47.164-0:03:47.430	IT1	0.129292	8	0.484357
Trial 1	1.3	Rep	M	0:03:47.430-0:03:47.696	IT1	0.112696	8	0.422189
Trial 1	1.3	Rep	M	0:03:47.696-0:03:47.962	IT1	0.103067	8	0.386113
Trial 1	1.3	Rep	M	0:03:47.962-0:03:48.228	IT1	0.14577	7	0.624103
Trial 1	1.3	Rep	M	0:03:48.228-0:03:48.494	IT1	0.0671117	8	0.251417
Trial 1	1.3	Rep	M	0:03:48.494-0:03:48.760	IT1	0.0479699	8	0.179707
Trial 1	1.3	Rep	M	0:03:48.760-0:03:49.026	IT1	0.0390393	8	0.14625
Trial 1	1.3	Rep	M	0:03:49.026-0:03:49.292	IT1	0.0337082	8	0.126279
Trial 1	1.3	Rep	M	0:03:49.292-0:03:49.558	IT1	0.111664	8	0.418322
Trial 1	1.3	Rep	M	0:03:49.558-0:03:49.824	IT1	0.086612	8	0.324472
Trial 1	1.3	Rep	M	0:03:49.824-0:03:50.090	IT1	0.214663	8	0.80418
Trial 1	1.3	Rep	M	0:03:50.090-0:03:50.356	IT1	0.0708256	8	0.26533
Trial 1	1.3	Rep	M	0:03:50.356-0:03:50.622	IT1	0.125747	8	0.471081
Trial 1	1.3	Rep	M	0:03:50.622-0:03:50.888	IT1	0.584355	8	2.18914
Trial 1	1.3	Rep	M	0:03:50.888-0:03:51.154	IT1	0.276918	8	1.03741
Trial 1	1.3	Rep	M	0:03:51.154-0:03:51.420	IT1	0.170622	8	0.639188
Trial 1	1.3	Rep	M	0:03:51.420-0:03:51.686	IT1	0.057863	8	0.216768
Trial 1	1.3	Rep	M	0:03:51.686-0:03:51.952	IT1	0.14621	8	0.54774
Trial 1	1.3	Rep	M	0:03:51.952-0:03:52.218	IT1	0.159437	8	0.597289
Trial 1	1.3	Rep	M	0:03:52.218-0:03:52.484	IT1	0.110703	8	0.414722
Trial 1	1.3	Rep	M	0:03:52.484-0:03:52.750	IT1	0.0716113	8	0.268273
Trial 1	1.3	Rep	M	0:03:52.750-0:03:53.016	IT1	0.595731	8	2.23175
Trial 1	1.3	Rep	M	0:03:53.016-0:03:53.282	IT1	0.211573	8	0.79261
Trial 1	1.3	Rep	M	0:03:53.282-0:03:53.548	IT1	0.141195	8	0.528951
Trial 1	1.3	Rep	M	0:03:53.548-0:03:53.814	IT1	0.107838	8	0.403988
Trial 1	1.3	Rep	M	0:03:53.814-0:03:54.080	IT1	0.0802649	8	0.300692
Trial 1	1.3	Rep	M	0:03:54.080-0:03:54.346	IT1	0.0768768	8	0.288
Trial 1	1.3	Rep	M	0:03:54.346-0:03:54.612	IT1	0.15452	8	0.578871
Trial 1	1.3	Rep	M	0:03:54.612-0:03:54.878	IT1	0.0868565	8	0.325385
Trial 1	1.3	Rep	M	0:03:54.878-0:03:55.144	IT1	0.083498	8	0.312805
Trial 1	1.3	Rep	M	0:03:55.144-0:03:55.410	IT1	0.0781631	8	0.292818
Trial 1	1.3	Rep	M	0:03:55.410-0:03:55.676	IT1	0.0890432	8	0.333578
Trial 1	1.3	Rep	M	0:03:55.676-0:03:55.942	IT1	0.0377208	8	0.141312
Trial 1	1.3	Rep	M	0:03:55.942-0:03:56.208	IT1	0.16857	8	0.631506
Trial 1	1.3	Rep	M	0:03:56.208-0:03:56.474	IT1	0.15791	8	0.59157
Trial 1	1.3	Rep	M	0:03:56.474-0:03:56.740	IT1	0.139959	8	0.524318
Trial 1	1.3	Rep	M	0:03:56.740-0:03:57.006	IT1	0.058915	8	0.220709
Trial 1	1.3	Rep	M	0:03:57.006-0:03:57.272	IT1	0.122623	8	0.459381
Trial 1	1.3	Rep	M	0:03:57.272-0:03:57.538	IT1	0.147632	8	0.553066
Trial 1	1.3	Rep	M	0:03:57.538-0:03:57.804	IT1	0.0414172	7	0.177324
Trial 1	1.3	Rep	M	0:03:57.804-0:03:58.070	IT1	0.0758091	8	0.283999
Trial 1	1.3	Rep	M	0:03:58.070-0:03:58.336	IT1	0.0591413	8	0.221557
Trial 1	1.3	Rep	M	0:03:58.336-0:03:58.602	IT1	0.0605065	8	0.226671
Trial 1	1.3	Rep	M	0:03:58.602-0:03:58.868	IT1	0.147139	8	0.551223
Trial 1	1.3	Rep	M	0:03:58.868-0:03:59.134	IT1	0.145829	8	0.546313
Trial 1	1.3	Rep	M	0:03:59.134-0:03:59.400	IT1	0.0746643	8	0.279712
Trial 1	1.3	Rep	M	0:03:59.400-0:03:59.666	IT1	0.0454231	8	0.170166
Trial 1	1.3	Rep	M	0:03:59.666-0:03:59.932	IT1	0.071762	8	0.26884
Trial 1	1.3	Rep	M	0:03:59.932-0:04:00.198	IT1	0.0558	8	0.209042
Trial 1	1.3	Rep	M	0:04:00.198-0:04:00.464	IT1	0.15657	8	0.586552
Trial 1	1.3	Rep	M	0:04:00.464-0:04:00.730	IT1	0.0833147	8	0.31212
Trial 1	1.3	Rep	M	0:04:00.730-0:04:00.996	IT1	0.0793356	8	0.297209
Trial 1	1.3	Rep	M	0:04:00.996-0:04:01.262	IT1	0.0561159	8	0.210224
Trial 1	1.3	Rep	M	0:04:01.262-0:04:01.528	IT1	0.125553	8	0.470356
Trial 1	1.3	Rep	M	0:04:01.528-0:04:01.794	IT1	0.14681	8	0.549986
Trial 1	1.3	Rep	M	0:04:01.794-0:04:02.060	IT1	0.0584772	8	0.219072
Trial 1	1.3	Rep	M	0:04:02.060-0:04:02.326	IT1	0.0919164	8	0.344341
Trial 1	1.3	Rep	M	0:04:02.326-0:04:02.592	IT1	0.0618431	8	0.231679
Trial 1	1.3	Rep	M	0:04:02.592-0:04:02.858	IT1	0.0780614	8	0.29244
Trial 1	1.3	Rep	M	0:04:02.858-0:04:03.124	IT1	0.081537	8	0.305458
Trial 1	1.3	Rep	M	0:04:03.124-0:04:03.390	IT1	0.208373	8	0.780619
Trial 1	1.3	Rep	M	0:04:03.390-0:04:03.656	IT1	0.118905	8	0.445448
Trial 1	1.3	Rep	M	0:04:03.656-0:04:03.922	IT1	0.0981409	8	0.36766
Trial 1	1.3	Rep	M	0:04:03.922-0:04:04.188	IT1	0.0483642	8	0.181185
Trial 1	1.3	Rep	M	0:04:04.188-0:04:04.454	IT1	0.108457	8	0.406304
Trial 1	1.3	Rep	M	0:04:04.454-0:04:04.720	IT1	0.0544464	8	0.203969
Trial 1	1.3	Rep	M	0:04:04.720-0:04:04.986	IT1	0.126393	8	0.473499
Trial 1	1.3	Rep	M	0:04:04.986-0:04:05.252	IT1	0.145963	8	0.546811
Trial 1	1.3	Rep	M	0:04:05.252-0:04:05.518	IT1	0.137377	8	0.514652
Trial 1	1.3	Rep	M	0:04:05.518-0:04:05.784	IT1	0.0790601	8	0.296178
Trial 1	1.3	Rep	M	0:04:05.784-0:04:06.050	IT1	0.0385403	8	0.144382
Trial 1	1.3	Rep	M	0:04:06.050-0:04:06.316	IT1	0.0716978	8	0.268597
Trial 1	1.3	Rep	M	0:04:06.316-0:04:06.582	IT1	0.155413	8	0.582213
Trial 1	1.3	Rep	M	0:04:06.582-0:04:06.848	IT1	0.78593	8	2.94427
Trial 1	1.3	Rep	M	0:04:06.848-0:04:07.114	IT1	0.373316	8	1.39853
Trial 1	1.3	Rep	M	0:04:07.114-0:04:07.380	IT1	0.256415	7	1.09782
Trial 1	1.3	Rep	M	0:04:07.380-0:04:07.646	IT1	0.324597	8	1.21603
Trial 1	1.3	Rep	M	0:04:07.646-0:04:07.912	IT1	0.301759	8	1.13046
Trial 1	1.3	Rep	M	0:04:07.912-0:04:08.178	IT1	0.326644	8	1.22369
Trial 1	1.3	Rep	M	0:04:08.178-0:04:08.444	IT1	0.485407	8	1.81846
Trial 1	1.3	Rep	M	0:04:08.444-0:04:08.710	IT1	1.23807	8	4.63813
Trial 1	1.3	Rep	M	0:04:08.710-0:04:08.976	IT1	2.6694	8	10.0002
Trial 1	1.3	Rep	M	0:04:08.976-0:04:09.242	IT1	0.265921	8	0.996204
Trial 1	1.3	Rep	M	0:04:09.242-0:04:09.508	IT1	0.415273	8	1.55572
Trial 1	1.3	Rep	M	0:04:09.508-0:04:09.774	IT1	0.965995	8	3.61886
Trial 1	1.3	Rep	M	0:04:09.774-0:04:10.040	IT1	0.30839	8	1.15531
Trial 1	1.3	Rep	M	0:04:10.040-0:04:10.306	IT1	0.33154	8	1.24203
Trial 1	1.3	Rep	M	0:04:10.306-0:04:10.572	IT1	0.493758	8	1.84973
Trial 1	1.3	Rep	M	0:04:10.572-0:04:10.838	IT1	2.28572	8	8.56289
Trial 1	1.3	Rep	M	0:04:10.838-0:04:11.104	IT1	1.39275	8	5.21758
Trial 1	1.3	Rep	M	0:04:11.104-0:04:11.370	IT1	0.35624	8	1.33456
Trial 1	1.3	Rep	M	0:04:11.370-0:04:11.636	IT1	0.568165	8	2.12849
Trial 1	1.3	Rep	M	0:04:11.636-0:04:11.902	IT1	0.807101	8	3.02359
Trial 1	1.3	Rep	M	0:04:11.902-0:04:12.168	IT1	0.730372	8	2.73614
Trial 1	1.3	Rep	M	0:04:12.168-0:04:12.434	IT1	1.82348	8	6.8312
Trial 1	1.3	Rep	M	0:04:12.434-0:04:12.700	IT1	1.86872	8	7.00067
Trial 1	1.3	Rep	M	0:04:12.700-0:04:12.966	IT1	3.27864	8	12.2826
Trial 1	1.3	Rep	M	0:04:12.966-0:04:13.232	IT1	3.85629	8	14.4466
Trial 1	1.3	Rep	M	0:04:13.232-0:04:13.498	IT1	4.38635	8	16.4324
Trial 1	1.3	Rep	M	0:04:13.498-0:04:13.764	IT1	4.93194	8	18.4762
Trial 1	1.3	Rep	M	0:04:13.764-0:04:14.030	IT1	2.33464	8	8.74615
Trial 1	1.3	Rep	M	0:04:14.030-0:04:14.296	IT1	0.543881	8	2.03752
Trial 1	1.3	Rep	M	0:04:14.296-0:04:14.562	IT1	1.13186	8	4.24024
Trial 1	1.3	Rep	M	0:04:14.562-0:04:14.828	IT1	0.808402	8	3.02848
Trial 1	1.3	Rep	M	0:04:14.828-0:04:15.094	IT1	0.548656	8	2.0554
Trial 1	1.3	Rep	M	0:04:15.094-0:04:15.360	IT1	0.598505	8	2.24215
Trial 1	1.3	Rep	M	0:04:15.360-0:04:15.626	IT1	1.32964	8	4.98117
Trial 1	1.3	Rep	M	0:04:15.626-0:04:15.892	IT1	2.03299	8	7.61608
Trial 1	1.3	Rep	M	0:04:15.892-0:04:16.158	IT1	2.1001	8	7.8675
Trial 1	1.3	Rep	M	0:04:16.158-0:04:16.424	IT1	1.07336	8	4.02105
Trial 1	1.3	Rep	M	0:04:16.424-0:04:16.690	IT1	1.03783	7	4.44341
Trial 1	1.3	Rep	M	0:04:16.690-0:04:16.956	IT1	0.613105	8	2.29684
Trial 1	1.3	Rep	M	0:04:16.956-0:04:17.222	IT1	0.771536	8	2.89039
Trial 1	1.3	Rep	M	0:04:17.222-0:04:17.488	IT1	0.817324	8	3.06188
Trial 1	1.3	Rep	M	0:04:17.488-0:04:17.754	IT1	0.493664	8	1.84939
Trial 1	1.3	Rep	M	0:04:17.754-0:04:18.020	IT1	0.278061	8	1.04168
Trial 1	1.3	Rep	M	0:04:18.020-0:04:18.286	IT1	0.875359	8	3.2793
Trial 1	1.3	Rep	M	0:04:18.286-0:04:18.552	IT1	0.396907	8	1.48691
Trial 1	1.3	Rep	M	0:04:18.552-0:04:18.818	IT1	0.40438	8	1.51491
Trial 1	1.3	Rep	M	0:04:18.818-0:04:19.084	IT1	0.482695	8	1.8083
Trial 1	1.3	Rep	M	0:04:19.084-0:04:19.350	IT1	0.271982	8	1.01891
Trial 1	1.3	Rep	M	0:04:19.350-0:04:19.616	IT1	0.259215	8	0.97108
Trial 1	1.3	Rep	M	0:04:19.616-0:04:19.882	IT1	0.177452	8	0.664781
Trial 1	1.3	Rep	M	0:04:19.882-0:04:20.148	IT1	0.279948	8	1.04875
Trial 1	1.3	Rep	M	0:04:20.148-0:04:20.414	IT1	0.119441	8	0.447455
Trial 1	1.3	Rep	M	0:04:20.414-0:04:20.680	IT1	0.0690955	8	0.25885
Trial 1	1.3	Rep	M	0:04:20.680-0:04:20.946	IT1	0.128589	8	0.481728
Trial 1	1.3	Rep	M	0:04:20.946-0:04:21.212	IT1	0.105753	8	0.39618
Trial 1	1.3	Rep	M	0:04:21.212-0:04:21.478	IT1	0.173023	8	0.648185
Trial 1	1.3	Rep	M	0:04:21.478-0:04:21.744	IT1	0.18184	8	0.681221
Trial 1	1.3	Rep	M	0:04:21.744-0:04:22.010	IT1	0.309517	8	1.15953
Trial 1	1.3	Rep	M	0:04:22.010-0:04:22.276	IT1	1.04227	8	3.9046
Trial 1	1.3	Rep	M	0:04:22.276-0:04:22.542	IT1	0.929857	8	3.48348
Trial 1	1.3	Rep	M	0:04:22.542-0:04:22.808	IT1	0.63146	8	2.3656
Trial 1	1.3	Rep	M	0:04:22.808-0:04:23.074	IT1	0.29338	8	1.09908
Trial 1	1.3	Rep	M	0:04:23.074-0:04:23.340	IT1	0.429093	8	1.60749
Trial 1	1.3	Rep	M	0:04:23.340-0:04:23.606	IT1	0.385185	8	1.443
Trial 1	1.3	Rep	M	0:04:23.606-0:04:23.872	IT1	0.987157	8	3.69815
Trial 1	1.3	Rep	M	0:04:23.872-0:04:24.138	IT1	2.51968	8	9.43933
Trial 1	1.3	Rep	M	0:04:24.138-0:04:24.404	IT1	2.89222	8	10.835
Trial 1	1.3	Rep	M	0:04:24.404-0:04:24.670	IT1	4.13823	8	15.5028
Trial 1	1.3	Rep	M	0:04:24.670-0:04:24.936	IT1	4.53465	8	16.9879
Trial 1	1.3	Rep	M	0:04:24.936-0:04:25.202	IT1	2.97008	8	11.1267
Trial 1	1.3	Rep	M	0:04:25.202-0:04:25.468	IT1	1.18028	8	4.42162
Trial 1	1.3	Rep	M	0:04:25.468-0:04:25.734	IT1	0.600179	8	2.24842
Trial 1	1.3	Rep	M	0:04:25.734-0:04:26.000	IT1	0.21191	8	0.793864
Trial 1	1.3	Rep	M	0:04:26.000-0:04:26.266	IT1	0.22828	7	0.97737
Trial 1	1.3	Rep	M	0:04:26.266-0:04:26.532	IT1	0.90534	8	3.39165
Trial 1	1.3	Rep	M	0:04:26.532-0:04:26.798	IT1	1.32651	8	4.96944
Trial 1	1.3	Rep	M	0:04:26.798-0:04:27.064	IT1	0.936112	8	3.50691
Trial 1	1.3	Rep	M	0:04:27.064-0:04:27.330	IT1	0.568385	8	2.12932
Trial 1	1.3	Rep	M	0:04:27.330-0:04:27.596	IT1	0.292456	8	1.09561
Trial 1	1.3	Rep	M	0:04:27.596-0:04:27.862	IT1	0.160085	8	0.599721
Trial 1	1.3	Rep	M	0:04:27.862-0:04:28.128	IT1	0.202775	8	0.759643
Trial 1	1.3	Rep	M	0:04:28.128-0:04:28.394	IT1	0.0826083	8	0.309471
Trial 1	1.3	Rep	M	0:04:28.394-0:04:28.660	IT1	0.147581	8	0.552878
Trial 1	1.3	Rep	M	0:04:28.660-0:04:28.926	IT1	0.0315809	8	0.118309
Trial 1	1.3	Rep	M	0:04:28.926-0:04:29.192	IT1	0.16018	8	0.600078
Trial 1	1.3	Rep	M	0:04:29.192-0:04:29.458	IT1	0.13142	8	0.492333
Trial 1	1.3	Rep	M	0:04:29.458-0:04:29.724	IT1	0.188651	8	0.706732
Trial 1	1.3	Rep	M	0:04:29.724-0:04:29.990	IT1	0.189372	8	0.709436
Trial 1	1.3	Rep	M	0:04:29.990-0:04:30.256	IT1	0.107152	8	0.401416
Trial 1	1.3	Rep	M	0:04:30.256-0:04:30.522	CS2a	0.0425969	8	0.159578
Trial 1	1.3	Rep	M	0:04:30.522-0:04:30.788	CS2a	0.110709	8	0.414743
Trial 1	1.3	Rep	M	0:04:30.788-0:04:31.054	CS2a	0.157639	8	0.590555
Trial 1	1.3	Rep	M	0:04:31.054-0:04:31.320	CS2a	0.0989072	8	0.370532
Trial 1	1.3	Rep	M	0:04:31.320-0:04:31.586	CS2a	0.10908	8	0.408638
Trial 1	1.3	Rep	M	0:04:31.586-0:04:31.852	CS2a	0.0675936	8	0.253224
Trial 1	1.3	Rep	M	0:04:31.852-0:04:32.118	CS2a	0.0895546	8	0.335494
Trial 1	1.3	Rep	M	0:04:32.118-0:04:32.384	CS2a	0.0717762	8	0.268892
Trial 1	1.3	Rep	M	0:04:32.384-0:04:32.650	CS2a	0.0542844	8	0.203363
Trial 1	1.3	Rep	M	0:04:32.650-0:04:32.916	CS2a	0.0939282	8	0.351877
Trial 1	1.3	Rep	M	0:04:32.916-0:04:33.182	CS2a	0.0512544	8	0.192011
Trial 1	1.3	Rep	M	0:04:33.182-0:04:33.448	CS2a	0.137935	8	0.516741
Trial 1	1.3	Rep	M	0:04:33.448-0:04:33.714	CS2a	0.101031	8	0.378486
Trial 1	1.3	Rep	M	0:04:33.714-0:04:33.980	CS2a	0.120805	8	0.452567
Trial 1	1.3	Rep	M	0:04:33.980-0:04:34.246	CS2a	0.040876	8	0.153131
Trial 1	1.3	Rep	M	0:04:34.246-0:04:34.512	CS2a	0.0428285	8	0.160448
Trial 1	1.3	Rep	M	0:04:34.512-0:04:34.778	CS2a	0.108699	8	0.40721
Trial 1	1.3	Rep	M	0:04:34.778-0:04:35.044	CS2a	0.0975038	8	0.365272
Trial 1	1.3	Rep	M	0:04:35.044-0:04:35.310	CS2a	0.0774225	8	0.290046
Trial 1	1.3	Rep	M	0:04:35.310-0:04:35.576	CS2a	0.0520654	8	0.195049
Trial 1	1.3	Rep	M	0:04:35.576-0:04:35.842	CS2a	0.170496	7	0.729968
Trial 1	1.3	Rep	M	0:04:35.842-0:04:36.108	CS2a	0.0242287	8	0.090767
Trial 1	1.3	Rep	M	0:04:36.108-0:04:36.374	CS2a	0.0423541	8	0.15867
Trial 1	1.3	Rep	M	0:04:36.374-0:04:36.640	CS2a	0.100542	8	0.376659
Trial 1	1.3	Rep	M	0:04:36.640-0:04:36.906	CS2a	0.131631	8	0.493123
Trial 1	1.3	Rep	M	0:04:36.906-0:04:37.172	CS2a	0.114333	8	0.42832
Trial 1	1.3	Rep	M	0:04:37.172-0:04:37.438	CS2a	0.100072	8	0.374897
Trial 1	1.3	Rep	M	0:04:37.438-0:04:37.704	CS2a	0.114725	8	0.429787
Trial 1	1.3	Rep	M	0:04:37.704-0:04:37.970	CS2a	0.0546123	8	0.20459
Trial 1	1.3	Rep	M	0:04:37.970-0:04:38.236	CS2a	0.136132	8	0.509982
Trial 1	1.3	Rep	M	0:04:38.236-0:04:38.502	CS2a	0.0905887	8	0.339367
Trial 1	1.3	Rep	M	0:04:38.502-0:04:38.768	CS2a	0.0940384	8	0.352292
Trial 1	1.3	Rep	M	0:04:38.768-0:04:39.034	CS2a	0.0863332	8	0.323425
Trial 1	1.3	Rep	M	0:04:39.034-0:04:39.300	CS2a	0.0972698	8	0.364396
Trial 1	1.3	Rep	M	0:04:39.300-0:04:39.566	CS2a	0.0536026	8	0.20081
Trial 1	1.3	Rep	M	0:04:39.566-0:04:39.832	CS2a	0.06741	8	0.252534
Trial 1	1.3	Rep	M	0:04:39.832-0:04:40.098	CS2a	0.0832476	8	0.311867
Trial 1	1.3	Rep	M	0:04:40.098-0:04:40.364	CS2b	0.143544	8	0.537753
Trial 1	1.3	Rep	M	0:04:40.364-0:04:40.630	CS2b	0.403302	8	1.51087
Trial 1	1.3	Rep	M	0:04:40.630-0:04:40.896	CS2b	0.431467	8	1.61638
Trial 1	1.3	Rep	M	0:04:40.896-0:04:41.162	CS2b	0.126715	8	0.474703
Trial 1	1.3	Rep	M	0:04:41.162-0:04:41.428	CS2b	0.0459229	8	0.172039
Trial 1	1.3	Rep	M	0:04:41.428-0:04:41.694	CS2b	0.0506943	8	0.189912
Trial 1	1.3	Rep	M	0:04:41.694-0:04:41.960	CS2b	0.0463446	8	0.173619
Trial 1	1.3	Rep	M	0:04:41.960-0:04:42.226	CS2b	0.0466789	8	0.174872
Trial 1	1.3	Rep	M	0:04:42.226-0:04:42.492	CS2b	0.0937043	8	0.351038
Trial 1	1.3	Rep	M	0:04:42.492-0:04:42.758	CS2b	0.0733431	8	0.274761
Trial 1	1.3	Rep	M	0:04:42.758-0:04:43.024	CS2b	0.132836	8	0.497639
Trial 1	1.3	Rep	M	0:04:43.024-0:04:43.290	CS2b	0.113553	8	0.425397
Trial 1	1.3	Rep	M	0:04:43.290-0:04:43.556	CS2b	0.181093	8	0.678417
Trial 1	1.3	Rep	M	0:04:43.556-0:04:43.822	CS2b	0.0824313	8	0.308808
Trial 1	1.3	Rep	M	0:04:43.822-0:04:44.088	CS2b	0.0578736	8	0.21681
Trial 1	1.3	Rep	M	0:04:44.088-0:04:44.354	CS2b	0.11627	8	0.435576
Trial 1	1.3	Rep	M	0:04:44.354-0:04:44.620	CS2b	0.0624259	8	0.233862
Trial 1	1.3	Rep	M	0:04:44.620-0:04:44.886	CS2b	0.127827	8	0.478874
Trial 1	1.3	Rep	M	0:04:44.886-0:04:45.152	CS2b	0.0644437	8	0.241421
Trial 1	1.3	Rep	M	0:04:45.152-0:04:45.418	CS2b	0.0575302	7	0.246313
Trial 1	1.3	Rep	M	0:04:45.418-0:04:45.684	CS2b	0.151093	8	0.566032
Trial 1	1.3	Rep	M	0:04:45.684-0:04:45.950	CS2b	1.33991	8	5.0196
Trial 1	1.3	Rep	M	0:04:45.950-0:04:46.216	CS2b	8.59617	8	32.2035
Trial 1	1.3	Rep	M	0:04:46.216-0:04:46.482	CS2b	7.65647	8	28.683
Trial 1	1.3	Rep	M	0:04:46.482-0:04:46.748	CS2b	4.92942	8	18.4668
Trial 1	1.3	Rep	M	0:04:46.748-0:04:47.014	CS2b	1.81948	8	6.81625
Trial 1	1.3	Rep	M	0:04:47.014-0:04:47.280	CS2b	0.432565	8	1.62049
Trial 1	1.3	Rep	M	0:04:47.280-0:04:47.546	CS2b	0.280687	8	1.05153
Trial 1	1.3	Rep	M	0:04:47.546-0:04:47.812	CS2b	0.228729	8	0.85688
Trial 1	1.3	Rep	M	0:04:47.812-0:04:48.078	CS2b	0.326375	8	1.22268
Trial 1	1.3	Rep	M	0:04:48.078-0:04:48.344	CS2b	0.14574	8	0.545978
Trial 1	1.3	Rep	M	0:04:48.344-0:04:48.610	CS2b	0.0935426	8	0.350434
Trial 1	1.3	Rep	M	0:04:48.610-0:04:48.876	CS2b	0.0817263	8	0.306167
Trial 1	1.3	Rep	M	0:04:48.876-0:04:49.142	CS2b	0.151233	8	0.566552
Trial 1	1.3	Rep	M	0:04:49.142-0:04:49.408	CS2b	0.110495	8	0.413941
Trial 1	1.3	Rep	M	0:04:49.408-0:04:49.674	CS2b	0.431177	8	1.6153
Trial 1	1.3	Rep	M	0:04:49.674-0:04:49.940	CS2b	2.09007	8	7.82991
Trial 1	1.3	Rep	M	0:04:49.940-0:04:50.206	CS2b	0.934098	8	3.49937
Trial 1	1.3	Rep	M	0:04:50.206-0:04:50.472	ITI2	0.22621	8	0.847436
Trial 1	1.3	Rep	M	0:04:50.472-0:04:50.738	ITI2	0.205291	8	0.769068
Trial 1	1.3	Rep	M	0:04:50.738-0:04:51.004	ITI2	0.122634	8	0.459418
Trial 1	1.3	Rep	M	0:04:51.004-0:04:51.270	ITI2	0.0425465	8	0.15939
Trial 1	1.3	Rep	M	0:04:51.270-0:04:51.536	ITI2	0.118249	8	0.44299
Trial 1	1.3	Rep	M	0:04:51.536-0:04:51.802	ITI2	0.0831592	8	0.311534
Trial 1	1.3	Rep	M	0:04:51.802-0:04:52.068	ITI2	0.111394	8	0.417312
Trial 1	1.3	Rep	M	0:04:52.068-0:04:52.334	ITI2	0.066797	8	0.25024
Trial 1	1.3	Rep	M	0:04:52.334-0:04:52.600	ITI2	0.151891	8	0.569024
Trial 1	1.3	Rep	M	0:04:52.600-0:04:52.866	ITI2	0.0588594	8	0.220502
Trial 1	1.3	Rep	M	0:04:52.866-0:04:53.132	ITI2	0.116526	8	0.43654
Trial 1	1.3	Rep	M	0:04:53.132-0:04:53.398	ITI2	0.0662743	8	0.248279
Trial 1	1.3	Rep	M	0:04:53.398-0:04:53.664	ITI2	0.14699	8	0.55066
Trial 1	1.3	Rep	M	0:04:53.664-0:04:53.930	ITI2	0.205424	8	0.769568
Trial 1	1.3	Rep	M	0:04:53.930-0:04:54.196	ITI2	0.0504494	8	0.188996
Trial 1	1.3	Rep	M	0:04:54.196-0:04:54.462	ITI2	0.0842496	8	0.315619
Trial 1	1.3	Rep	M	0:04:54.462-0:04:54.728	ITI2	0.101042	7	0.432603
Trial 1	1.3	Rep	M	0:04:54.728-0:04:54.994	ITI2	0.119087	8	0.446126
Trial 1	1.3	Rep	M	0:04:54.994-0:04:55.260	ITI2	0.0903507	8	0.338478
Trial 1	1.3	Rep	M	0:04:55.260-0:04:55.526	ITI2	0.0645825	8	0.241941
Trial 1	1.3	Rep	M	0:04:55.526-0:04:55.792	ITI2	0.0841597	8	0.315283
Trial 1	1.3	Rep	M	0:04:55.792-0:04:56.058	ITI2	0.0622341	8	0.233145
Trial 1	1.3	Rep	M	0:04:56.058-0:04:56.324	ITI2	0.265335	8	0.994015
Trial 1	1.3	Rep	M	0:04:56.324-0:04:56.590	ITI2	0.0633774	8	0.23743
Trial 1	1.3	Rep	M	0:04:56.590-0:04:56.856	ITI2	0.125474	8	0.470055
Trial 1	1.3	Rep	M	0:04:56.856-0:04:57.122	ITI2	0.107682	8	0.403403
Trial 1	1.3	Rep	M	0:04:57.122-0:04:57.388	ITI2	0.176505	8	0.661231
Trial 1	1.3	Rep	M	0:04:57.388-0:04:57.654	ITI2	0.0521933	8	0.195529
Trial 1	1.3	Rep	M	0:04:57.654-0:04:57.920	ITI2	0.0422919	8	0.158436
Trial 1	1.3	Rep	M	0:04:57.920-0:04:58.186	ITI2	0.103757	8	0.388698
Trial 1	1.3	Rep	M	0:04:58.186-0:04:58.452	ITI2	0.0756513	8	0.283408
Trial 1	1.3	Rep	M	0:04:58.452-0:04:58.718	ITI2	0.159578	8	0.597819
Trial 1	1.3	Rep	M	0:04:58.718-0:04:58.984	ITI2	0.0680625	8	0.254977
Trial 1	1.3	Rep	M	0:04:58.984-0:04:59.250	ITI2	0.196748	8	0.73707
Trial 1	1.3	Rep	M	0:04:59.250-0:04:59.516	ITI2	0.0664605	8	0.248977
Trial 1	1.3	Rep	M	0:04:59.516-0:04:59.782	ITI2	0.114766	8	0.429944
Trial 1	1.3	Rep	M	0:04:59.782-0:05:00.048	ITI2	0.133484	8	0.500069
Trial 1	1.3	Rep	M	0:05:00.048-0:05:00.314	ITI2	0.0884488	8	0.33135
Trial 1	1.3	Rep	M	0:05:00.314-0:05:00.580	ITI2	0.137479	8	0.515029
Trial 1	1.3	Rep	M	0:05:00.580-0:05:00.846	ITI2	0.12978	8	0.486189
Trial 1	1.3	Rep	M	0:05:00.846-0:05:01.112	ITI2	0.104363	8	0.39097
Trial 1	1.3	Rep	M	0:05:01.112-0:05:01.378	ITI2	0.0655973	8	0.245743
Trial 1	1.3	Rep	M	0:05:01.378-0:05:01.644	ITI2	0.0941148	8	0.352578
Trial 1	1.3	Rep	M	0:05:01.644-0:05:01.910	ITI2	0.115242	8	0.431727
Trial 1	1.3	Rep	M	0:05:01.910-0:05:02.176	ITI2	0.191182	8	0.716218
Trial 1	1.3	Rep	M	0:05:02.176-0:05:02.442	ITI2	0.191562	8	0.717642
Trial 1	1.3	Rep	M	0:05:02.442-0:05:02.708	ITI2	0.0903155	8	0.338345
Trial 1	1.3	Rep	M	0:05:02.708-0:05:02.974	ITI2	0.0882423	8	0.330578
Trial 1	1.3	Rep	M	0:05:02.974-0:05:03.240	ITI2	0.0939055	8	0.351792
Trial 1	1.3	Rep	M	0:05:03.240-0:05:03.506	ITI2	0.34451	8	1.29062
Trial 1	1.3	Rep	M	0:05:03.506-0:05:03.772	ITI2	0.177194	8	0.663813
Trial 1	1.3	Rep	M	0:05:03.772-0:05:04.038	ITI2	0.243459	8	0.912051
Trial 1	1.3	Rep	M	0:05:04.038-0:05:04.304	ITI2	0.319331	7	1.36719
Trial 1	1.3	Rep	M	0:05:04.304-0:05:04.570	ITI2	0.347644	8	1.30237
Trial 1	1.3	Rep	M	0:05:04.570-0:05:04.836	ITI2	0.317059	8	1.18778
Trial 1	1.3	Rep	M	0:05:04.836-0:05:05.102	ITI2	0.187225	8	0.701393
Trial 1	1.3	Rep	M	0:05:05.102-0:05:05.368	ITI2	0.276725	8	1.03668
Trial 1	1.3	Rep	M	0:05:05.368-0:05:05.634	ITI2	0.101715	8	0.381049
Trial 1	1.3	Rep	M	0:05:05.634-0:05:05.900	ITI2	0.232416	8	0.870691
Trial 1	1.3	Rep	M	0:05:05.900-0:05:06.166	ITI2	0.0728856	8	0.273049
Trial 1	1.3	Rep	M	0:05:06.166-0:05:06.432	ITI2	0.197133	8	0.738506
Trial 1	1.3	Rep	M	0:05:06.432-0:05:06.698	ITI2	0.0717358	8	0.268741
Trial 1	1.3	Rep	M	0:05:06.698-0:05:06.964	ITI2	0.275199	8	1.03096
Trial 1	1.3	Rep	M	0:05:06.964-0:05:07.230	ITI2	0.531767	8	1.99213
Trial 1	1.3	Rep	M	0:05:07.230-0:05:07.496	ITI2	0.796174	8	2.98267
Trial 1	1.3	Rep	M	0:05:07.496-0:05:07.762	ITI2	0.325748	8	1.22033
Trial 1	1.3	Rep	M	0:05:07.762-0:05:08.028	ITI2	0.246416	8	0.923136
Trial 1	1.3	Rep	M	0:05:08.028-0:05:08.294	ITI2	0.261441	8	0.979416
Trial 1	1.3	Rep	M	0:05:08.294-0:05:08.560	ITI2	0.208551	8	0.781282
Trial 1	1.3	Rep	M	0:05:08.560-0:05:08.826	ITI2	0.414245	8	1.55186
Trial 1	1.3	Rep	M	0:05:08.826-0:05:09.092	ITI2	0.186489	8	0.698633
Trial 1	1.3	Rep	M	0:05:09.092-0:05:09.358	ITI2	0.391636	8	1.46717
Trial 1	1.3	Rep	M	0:05:09.358-0:05:09.624	ITI2	0.331712	8	1.24268
Trial 1	1.3	Rep	M	0:05:09.624-0:05:09.890	ITI2	0.227292	8	0.851492
Trial 1	1.3	Rep	M	0:05:09.890-0:05:10.156	ITI2	0.074169	8	0.277854
Trial 1	1.3	Rep	M	0:05:10.156-0:05:10.422	ITI2	0.0954809	8	0.357694
Trial 1	1.3	Rep	M	0:05:10.422-0:05:10.688	ITI2	0.145243	8	0.544117
Trial 1	1.3	Rep	M	0:05:10.688-0:05:10.954	ITI2	0.0880233	8	0.329757
Trial 1	1.3	Rep	M	0:05:10.954-0:05:11.220	ITI2	0.242021	8	0.906673
Trial 1	1.3	Rep	M	0:05:11.220-0:05:11.486	ITI2	0.199065	8	0.745746
Trial 1	1.3	Rep	M	0:05:11.486-0:05:11.752	ITI2	0.357675	8	1.33994
Trial 1	1.3	Rep	M	0:05:11.752-0:05:12.018	ITI2	0.248051	8	0.929262
Trial 1	1.3	Rep	M	0:05:12.018-0:05:12.284	ITI2	0.354567	8	1.3283
Trial 1	1.3	Rep	M	0:05:12.284-0:05:12.550	ITI2	0.252651	8	0.946492
Trial 1	1.3	Rep	M	0:05:12.550-0:05:12.816	ITI2	0.150831	8	0.56505
Trial 1	1.3	Rep	M	0:05:12.816-0:05:13.082	ITI2	0.258386	8	0.967979
Trial 1	1.3	Rep	M	0:05:13.082-0:05:13.348	ITI2	0.0489124	8	0.183238
Trial 1	1.3	Rep	M	0:05:13.348-0:05:13.614	ITI2	0.133545	8	0.50029
Trial 1	1.3	Rep	M	0:05:13.614-0:05:13.880	ITI2	0.0874074	7	0.374229
Trial 1	1.3	Rep	M	0:05:13.880-0:05:14.146	ITI2	0.12535	8	0.469592
Trial 1	1.3	Rep	M	0:05:14.146-0:05:14.412	ITI2	0.105525	8	0.395321
Trial 1	1.3	Rep	M	0:05:14.412-0:05:14.678	ITI2	0.104994	8	0.393333
Trial 1	1.3	Rep	M	0:05:14.678-0:05:14.944	ITI2	0.191062	8	0.715767
Trial 1	1.3	Rep	M	0:05:14.944-0:05:15.210	ITI2	0.137155	8	0.513814
Trial 1	1.3	Rep	M	0:05:15.210-0:05:15.476	ITI2	0.0973928	8	0.364857
Trial 1	1.3	Rep	M	0:05:15.476-0:05:15.742	ITI2	0.0912806	8	0.341958
Trial 1	1.3	Rep	M	0:05:15.742-0:05:16.008	ITI2	0.172814	8	0.647402
Trial 1	1.3	Rep	M	0:05:16.008-0:05:16.274	ITI2	0.0975905	8	0.365599
Trial 1	1.3	Rep	M	0:05:16.274-0:05:16.540	ITI2	0.133107	8	0.498652
Trial 1	1.3	Rep	M	0:05:16.540-0:05:16.806	ITI2	0.102775	8	0.385018
Trial 1	1.3	Rep	M	0:05:16.806-0:05:17.072	ITI2	0.10996	8	0.411937
Trial 1	1.3	Rep	M	0:05:17.072-0:05:17.338	ITI2	0.148142	8	0.554976
Trial 1	1.3	Rep	M	0:05:17.338-0:05:17.604	ITI2	0.337908	8	1.26589
Trial 1	1.3	Rep	M	0:05:17.604-0:05:17.870	ITI2	0.284568	8	1.06606
Trial 1	1.3	Rep	M	0:05:17.870-0:05:18.136	ITI2	0.178623	8	0.669168
Trial 1	1.3	Rep	M	0:05:18.136-0:05:18.402	ITI2	0.195688	8	0.733095
Trial 1	1.3	Rep	M	0:05:18.402-0:05:18.668	ITI2	0.122061	8	0.457269
Trial 1	1.3	Rep	M	0:05:18.668-0:05:18.934	ITI2	0.0969013	8	0.363018
Trial 1	1.3	Rep	M	0:05:18.934-0:05:19.200	ITI2	0.0748602	8	0.280444
Trial 1	1.3	Rep	M	0:05:19.200-0:05:19.466	ITI2	0.0666112	8	0.249544
Trial 1	1.3	Rep	M	0:05:19.466-0:05:19.732	ITI2	0.0395285	8	0.148083
Trial 1	1.3	Rep	M	0:05:19.732-0:05:19.998	ITI2	0.0489476	8	0.183369
Trial 1	1.3	Rep	M	0:05:19.998-0:05:20.264	ITI2	0.160371	8	0.600788
Trial 1	1.3	Rep	M	0:05:20.264-0:05:20.530	ITI2	0.0578317	8	0.216652
Trial 1	1.3	Rep	M	0:05:20.530-0:05:20.796	ITI2	0.0834545	8	0.312643
Trial 1	1.3	Rep	M	0:05:20.796-0:05:21.062	ITI2	0.049394	8	0.185041
Trial 1	1.3	Rep	M	0:05:21.062-0:05:21.328	ITI2	0.0875677	8	0.328049
Trial 1	1.3	Rep	M	0:05:21.328-0:05:21.594	ITI2	0.0842533	8	0.315634
Trial 1	1.3	Rep	M	0:05:21.594-0:05:21.860	ITI2	0.0665831	8	0.249437
Trial 1	1.3	Rep	M	0:05:21.860-0:05:22.126	ITI2	0.0663379	8	0.248518
Trial 1	1.3	Rep	M	0:05:22.126-0:05:22.392	ITI2	0.10397	8	0.389497
Trial 1	1.3	Rep	M	0:05:22.392-0:05:22.658	ITI2	0.0904054	8	0.338681
Trial 1	1.3	Rep	M	0:05:22.658-0:05:22.924	ITI2	0.113918	8	0.426768
Trial 1	1.3	Rep	M	0:05:22.924-0:05:23.190	ITI2	0.0874118	8	0.327466
Trial 1	1.3	Rep	M	0:05:23.190-0:05:23.456	ITI2	0.0361302	7	0.154689
Trial 1	1.3	Rep	M	0:05:23.456-0:05:23.722	ITI2	0.0872566	8	0.326888
Trial 1	1.3	Rep	M	0:05:23.722-0:05:23.988	ITI2	0.244984	8	0.917771
Trial 1	1.3	Rep	M	0:05:23.988-0:05:24.254	ITI2	0.19229	8	0.720369
Trial 1	1.3	Rep	M	0:05:24.254-0:05:24.520	ITI2	0.189949	8	0.711594
Trial 1	1.3	Rep	M	0:05:24.520-0:05:24.786	ITI2	0.0679839	8	0.254683
Trial 1	1.3	Rep	M	0:05:24.786-0:05:25.052	ITI2	0.148076	8	0.554732
Trial 1	1.3	Rep	M	0:05:25.052-0:05:25.318	ITI2	0.209023	8	0.783053
Trial 1	1.3	Rep	M	0:05:25.318-0:05:25.584	ITI2	0.166089	8	0.62221
Trial 1	1.3	Rep	M	0:05:25.584-0:05:25.850	ITI2	0.120266	8	0.450545
Trial 1	1.3	Rep	M	0:05:25.850-0:05:26.116	ITI2	0.0652267	8	0.244356
Trial 1	1.3	Rep	M	0:05:26.116-0:05:26.382	ITI2	0.141516	8	0.530153
Trial 1	1.3	Rep	M	0:05:26.382-0:05:26.648	ITI2	0.150876	8	0.565217
Trial 1	1.3	Rep	M	0:05:26.648-0:05:26.914	ITI2	0.169027	8	0.633221
Trial 1	1.3	Rep	M	0:05:26.914-0:05:27.180	ITI2	0.193337	8	0.724285
Trial 1	1.3	Rep	M	0:05:27.180-0:05:27.446	ITI2	0.0961145	8	0.36007
Trial 1	1.3	Rep	M	0:05:27.446-0:05:27.712	ITI2	0.0943296	8	0.353381
Trial 1	1.3	Rep	M	0:05:27.712-0:05:27.978	ITI2	0.109816	8	0.411396
Trial 1	1.3	Rep	M	0:05:27.978-0:05:28.244	ITI2	0.140405	8	0.525993
Trial 1	1.3	Rep	M	0:05:28.244-0:05:28.510	ITI2	0.13261	8	0.496787
Trial 1	1.3	Rep	M	0:05:28.510-0:05:28.776	ITI2	0.126784	8	0.474963
Trial 1	1.3	Rep	M	0:05:28.776-0:05:29.042	ITI2	0.0732941	8	0.274577
Trial 1	1.3	Rep	M	0:05:29.042-0:05:29.308	ITI2	0.197701	8	0.74064
Trial 1	1.3	Rep	M	0:05:29.308-0:05:29.574	ITI2	0.0632126	8	0.236811
Trial 1	1.3	Rep	M	0:05:29.574-0:05:29.840	ITI2	0.157506	8	0.590059
Trial 1	1.3	Rep	M	0:05:29.840-0:05:30.106	ITI2	0.119207	8	0.446581
Trial 1	1.3	Rep	M	0:05:30.106-0:05:30.372	ITI2	0.0814603	8	0.305171
Trial 1	1.3	Rep	M	0:05:30.372-0:05:30.638	ITI2	0.0822891	8	0.308276
Trial 1	1.3	Rep	M	0:05:30.638-0:05:30.904	ITI2	0.13223	8	0.495366
Trial 1	1.3	Rep	M	0:05:30.904-0:05:31.170	ITI2	0.108662	8	0.407072
Trial 1	1.3	Rep	M	0:05:31.170-0:05:31.436	ITI2	0.049725	8	0.186282
Trial 1	1.3	Rep	M	0:05:31.436-0:05:31.702	ITI2	0.179205	8	0.671345
Trial 1	1.3	Rep	M	0:05:31.702-0:05:31.968	ITI2	0.118919	8	0.4455
Trial 1	1.3	Rep	M	0:05:31.968-0:05:32.234	ITI2	0.11601	8	0.434603
Trial 1	1.3	Rep	M	0:05:32.234-0:05:32.500	ITI2	0.0534435	8	0.200213
Trial 1	1.3	Rep	M	0:05:32.500-0:05:32.766	ITI2	0.0330442	7	0.141475
Trial 1	1.3	Rep	M	0:05:32.766-0:05:33.032	ITI2	0.0428199	8	0.160415
Trial 1	1.3	Rep	M	0:05:33.032-0:05:33.298	ITI2	0.0664466	8	0.248925
Trial 1	1.3	Rep	M	0:05:33.298-0:05:33.564	ITI2	0.14013	8	0.524963
Trial 1	1.3	Rep	M	0:05:33.564-0:05:33.830	ITI2	0.0498271	8	0.186666
Trial 1	1.3	Rep	M	0:05:33.830-0:05:34.096	ITI2	0.115632	8	0.433183
Trial 1	1.3	Rep	M	0:05:34.096-0:05:34.362	ITI2	0.0858639	8	0.321669
Trial 1	1.3	Rep	M	0:05:34.362-0:05:34.628	ITI2	0.120641	8	0.451949
Trial 1	1.3	Rep	M	0:05:34.628-0:05:34.894	ITI2	0.144841	8	0.542611
Trial 1	1.3	Rep	M	0:05:34.894-0:05:35.160	ITI2	0.123663	8	0.463275
Trial 1	1.3	Rep	M	0:05:35.160-0:05:35.426	ITI2	0.210885	8	0.790027
Trial 1	1.3	Rep	M	0:05:35.426-0:05:35.692	ITI2	0.141566	8	0.530345
Trial 1	1.3	Rep	M	0:05:35.692-0:05:35.958	ITI2	0.130397	8	0.488501
Trial 1	1.3	Rep	M	0:05:35.958-0:05:36.224	ITI2	0.111697	8	0.418443
Trial 1	1.3	Rep	M	0:05:36.224-0:05:36.490	ITI2	0.16869	8	0.631952
Trial 1	1.3	Rep	M	0:05:36.490-0:05:36.756	ITI2	0.0772966	8	0.289572
Trial 1	1.3	Rep	M	0:05:36.756-0:05:37.022	ITI2	0.15981	8	0.598687
Trial 1	1.3	Rep	M	0:05:37.022-0:05:37.288	ITI2	0.132613	8	0.496802
Trial 1	1.3	Rep	M	0:05:37.288-0:05:37.554	ITI2	0.143573	8	0.537857
Trial 1	1.3	Rep	M	0:05:37.554-0:05:37.820	ITI2	0.104907	8	0.39301
Trial 1	1.3	Rep	M	0:05:37.820-0:05:38.086	ITI2	0.0637948	8	0.238991
Trial 1	1.3	Rep	M	0:05:38.086-0:05:38.352	ITI2	0.313091	8	1.17292
Trial 1	1.3	Rep	M	0:05:38.352-0:05:38.618	ITI2	0.238913	8	0.895036
Trial 1	1.3	Rep	M	0:05:38.618-0:05:38.884	ITI2	0.113477	8	0.42511
Trial 1	1.3	Rep	M	0:05:38.884-0:05:39.150	ITI2	0.0634767	8	0.2378
Trial 1	1.3	Rep	M	0:05:39.150-0:05:39.416	ITI2	0.083774	8	0.313838
Trial 1	1.3	Rep	M	0:05:39.416-0:05:39.682	ITI2	0.132522	8	0.496459
Trial 1	1.3	Rep	M	0:05:39.682-0:05:39.948	ITI2	0.228502	8	0.856029
Trial 1	1.3	Rep	M	0:05:39.948-0:05:40.214	ITI2	0.185947	8	0.696605
Trial 1	1.3	Rep	M	0:05:40.214-0:05:40.480	ITI2	0.296237	8	1.10978
Trial 1	1.3	Rep	M	0:05:40.480-0:05:40.746	ITI2	0.358398	8	1.34264
Trial 1	1.3	Rep	M	0:05:40.746-0:05:41.012	ITI2	0.186476	8	0.698585
Trial 1	1.3	Rep	M	0:05:41.012-0:05:41.278	ITI2	0.288497	8	1.08079
Trial 1	1.3	Rep	M	0:05:41.278-0:05:41.544	ITI2	0.143572	8	0.537857
Trial 1	1.3	Rep	M	0:05:41.544-0:05:41.810	ITI2	0.35496	8	1.32977
Trial 1	1.3	Rep	M	0:05:41.810-0:05:42.076	ITI2	0.703045	8	2.63378
Trial 1	1.3	Rep	M	0:05:42.076-0:05:42.342	ITI2	0.446918	7	1.91344
Trial 1	1.3	Rep	M	0:05:42.342-0:05:42.608	ITI2	0.486269	8	1.82169
Trial 1	1.3	Rep	M	0:05:42.608-0:05:42.874	ITI2	0.373353	8	1.39867
Trial 1	1.3	Rep	M	0:05:42.874-0:05:43.140	ITI2	0.407939	8	1.52824
Trial 1	1.3	Rep	M	0:05:43.140-0:05:43.406	ITI2	0.199028	8	0.745612
Trial 1	1.3	Rep	M	0:05:43.406-0:05:43.672	ITI2	0.368859	8	1.38184
Trial 1	1.3	Rep	M	0:05:43.672-0:05:43.938	ITI2	0.391882	8	1.46809
Trial 1	1.3	Rep	M	0:05:43.938-0:05:44.204	ITI2	0.84011	8	3.14726
Trial 1	1.3	Rep	M	0:05:44.204-0:05:44.470	ITI2	1.10684	8	4.1465
Trial 1	1.3	Rep	M	0:05:44.470-0:05:44.736	ITI2	2.26913	8	8.50071
Trial 1	1.3	Rep	M	0:05:44.736-0:05:45.002	ITI2	1.85775	8	6.95961
Trial 1	1.3	Rep	M	0:05:45.002-0:05:45.268	ITI2	5.21273	8	19.5282
Trial 1	1.3	Rep	M	0:05:45.268-0:05:45.534	ITI2	5.16964	8	19.3666
Trial 1	1.3	Rep	M	0:05:45.534-0:05:45.800	ITI2	0.320871	8	1.20206
Trial 1	1.3	Rep	M	0:05:45.800-0:05:46.066	ITI2	0.156923	8	0.587872
Trial 1	1.3	Rep	M	0:05:46.066-0:05:46.332	ITI2	0.156923	8	0.58787
Trial 1	1.3	Rep	M	0:05:46.332-0:05:46.598	ITI2	0.156923	8	0.587872
Trial 1	1.3	Rep	M	0:05:46.598-0:05:46.864	ITI2	0.419291	8	1.57078
Trial 1	1.3	Rep	M	0:05:46.864-0:05:47.130	ITI2	1.46607	8	5.49227
Trial 1	1.3	Rep	M	0:05:47.130-0:05:47.396	ITI2	1.5721	8	5.88951
Trial 1	1.3	Rep	M	0:05:47.396-0:05:47.662	ITI2	0.809027	8	3.03081
Trial 1	1.3	Rep	M	0:05:47.662-0:05:47.928	ITI2	1.50369	8	5.63319
Trial 1	1.3	Rep	M	0:05:47.928-0:05:48.194	ITI2	1.9861	8	7.4404
Trial 1	1.3	Rep	M	0:05:48.194-0:05:48.460	ITI2	1.1467	8	4.29581
Trial 1	1.3	Rep	M	0:05:48.460-0:05:48.726	ITI2	2.32874	8	8.72407
Trial 1	1.3	Rep	M	0:05:48.726-0:05:48.992	ITI2	2.59603	8	9.72535
Trial 1	1.3	Rep	M	0:05:48.992-0:05:49.258	ITI2	0.681763	8	2.55407
Trial 1	1.3	Rep	M	0:05:49.258-0:05:49.524	ITI2	3.51637	8	13.1732
Trial 1	1.3	Rep	M	0:05:49.524-0:05:49.790	ITI2	4.39901	8	16.4798
Trial 1	1.3	Rep	M	0:05:49.790-0:05:50.056	ITI2	2.52245	8	9.44975
Trial 1	1.3	Rep	M	0:05:50.056-0:05:50.322	ITI2	0.387866	8	1.45303
Trial 1	1.3	Rep	M	0:05:50.322-0:05:50.588	ITI2	1.35252	8	5.06692
Trial 1	1.3	Rep	M	0:05:50.588-0:05:50.854	ITI2	2.28728	8	8.56869
Trial 1	1.3	Rep	M	0:05:50.854-0:05:51.120	ITI2	0.945892	8	3.54354
Trial 1	1.3	Rep	M	0:05:51.120-0:05:51.386	ITI2	0.988065	8	3.70154
Trial 1	1.3	Rep	M	0:05:51.386-0:05:51.652	ITI2	0.967637	8	3.625
Trial 1	1.3	Rep	M	0:05:51.652-0:05:51.918	ITI2	0.46088	7	1.97322
Trial 1	1.3	Rep	M	0:05:51.918-0:05:52.184	ITI2	0.384461	8	1.44028
Trial 1	1.3	Rep	M	0:05:52.184-0:05:52.450	ITI2	0.253062	8	0.948037
Trial 1	1.3	Rep	M	0:05:52.450-0:05:52.716	ITI2	0.430066	8	1.61113
Trial 1	1.3	Rep	M	0:05:52.716-0:05:52.982	ITI2	0.3083	8	1.15497
Trial 1	1.3	Rep	M	0:05:52.982-0:05:53.248	ITI2	0.396372	8	1.48491
Trial 1	1.3	Rep	M	0:05:53.248-0:05:53.514	ITI2	1.155	8	4.32691
Trial 1	1.3	Rep	M	0:05:53.514-0:05:53.780	ITI2	3.47653	8	13.0239
Trial 1	1.3	Rep	M	0:05:53.780-0:05:54.046	ITI2	3.95337	8	14.8103
Trial 1	1.3	Rep	M	0:05:54.046-0:05:54.312	ITI2	4.91972	8	18.4306
Trial 1	1.3	Rep	M	0:05:54.312-0:05:54.578	ITI2	5.12049	8	19.1826
Trial 1	1.3	Rep	M	0:05:54.578-0:05:54.844	ITI2	2.78679	8	10.44
Trial 1	1.3	Rep	M	0:05:54.844-0:05:55.110	ITI2	0.291157	8	1.09075
Trial 1	1.3	Rep	M	0:05:55.110-0:05:55.376	ITI2	0.337149	8	1.26304
Trial 1	1.3	Rep	M	0:05:55.376-0:05:55.642	ITI2	0.207633	8	0.777849
Trial 1	1.3	Rep	M	0:05:55.642-0:05:55.908	ITI2	0.284624	8	1.06627
Trial 1	1.3	Rep	M	0:05:55.908-0:05:56.174	ITI2	0.540339	8	2.02425
Trial 1	1.3	Rep	M	0:05:56.174-0:05:56.440	ITI2	0.452881	8	1.6966
Trial 1	1.3	Rep	M	0:05:56.440-0:05:56.706	ITI2	0.211073	8	0.79073
Trial 1	1.3	Rep	M	0:05:56.706-0:05:56.972	ITI2	0.245457	8	0.919542
Trial 1	1.3	Rep	M	0:05:56.972-0:05:57.238	ITI2	0.135105	8	0.506142
Trial 1	1.3	Rep	M	0:05:57.238-0:05:57.504	ITI2	1.2104	8	4.53445
Trial 1	1.3	Rep	M	0:05:57.504-0:05:57.770	ITI2	0.505685	8	1.89441
Trial 1	1.3	Rep	M	0:05:57.770-0:05:58.036	ITI2	0.217533	8	0.814931
Trial 1	1.3	Rep	M	0:05:58.036-0:05:58.302	ITI2	0.106291	8	0.398195
Trial 1	1.3	Rep	M	0:05:58.302-0:05:58.568	ITI2	0.167628	8	0.627975
Trial 1	1.3	Rep	M	0:05:58.568-0:05:58.834	ITI2	0.139359	8	0.522078
Trial 1	1.3	Rep	M	0:05:58.834-0:05:59.100	ITI2	0.0960623	8	0.359872
Trial 1	1.3	Rep	M	0:05:59.100-0:05:59.366	ITI2	0.219097	8	0.820787
Trial 1	1.3	Rep	M	0:05:59.366-0:05:59.632	ITI2	0.790442	8	2.96118
Trial 1	1.3	Rep	M	0:05:59.632-0:05:59.898	ITI2	0.448822	8	1.6814
Trial 1	1.3	Rep	M	0:05:59.898-0:06:00.164	ITI2	0.387414	8	1.45136
Trial 1	1.3	Rep	M	0:06:00.164-0:06:00.430	ITI2	0.457898	8	1.71539
Trial 1	1.3	Rep	M	0:06:00.430-0:06:00.696	ITI2	0.282783	8	1.05937
Trial 1	1.3	Rep	M	0:06:00.696-0:06:00.962	ITI2	0.141372	8	0.529614
Trial 1	1.3	Rep	M	0:06:00.962-0:06:01.228	ITI2	0.291944	8	1.09369
Trial 1	1.3	Rep	M	0:06:01.228-0:06:01.494	ITI2	0.196717	7	0.842222
Trial 1	1.3	Rep	M	0:06:01.494-0:06:01.760	ITI2	0.607067	8	2.27421
Trial 1	1.3	Rep	M	0:06:01.760-0:06:02.026	ITI2	0.132387	8	0.495953
Trial 1	1.3	Rep	M	0:06:02.026-0:06:02.292	ITI2	0.601753	8	2.25431
Trial 1	1.3	Rep	M	0:06:02.292-0:06:02.558	ITI2	0.513672	8	1.92433
Trial 1	1.3	Rep	M	0:06:02.558-0:06:02.824	ITI2	0.216292	8	0.810283
Trial 1	1.3	Rep	M	0:06:02.824-0:06:03.090	ITI2	0.207065	8	0.775717
Trial 1	1.3	Rep	M	0:06:03.090-0:06:03.356	ITI2	0.115584	8	0.433008
Trial 1	1.3	Rep	M	0:06:03.356-0:06:03.622	ITI2	0.156388	8	0.585869
Trial 1	1.3	Rep	M	0:06:03.622-0:06:03.888	ITI2	0.0699415	8	0.262017
Trial 1	1.3	Rep	M	0:06:03.888-0:06:04.154	ITI2	0.177756	8	0.665915
Trial 1	1.3	Rep	M	0:06:04.154-0:06:04.420	ITI2	0.150465	8	0.563679
Trial 1	1.3	Rep	M	0:06:04.420-0:06:04.686	ITI2	0.259648	8	0.972705
Trial 1	1.3	Rep	M	0:06:04.686-0:06:04.952	ITI2	0.513258	8	1.9228
Trial 1	1.3	Rep	M	0:06:04.952-0:06:05.218	ITI2	0.266915	8	0.999933
Trial 1	1.3	Rep	M	0:06:05.218-0:06:05.484	ITI2	0.214351	8	0.803016
Trial 1	1.3	Rep	M	0:06:05.484-0:06:05.750	ITI2	0.285061	8	1.06791
Trial 1	1.3	Rep	M	0:06:05.750-0:06:06.016	ITI2	0.324267	8	1.21478
Trial 1	1.3	Rep	M	0:06:06.016-0:06:06.282	ITI2	0.149009	8	0.558225
Trial 1	1.3	Rep	M	0:06:06.282-0:06:06.548	ITI2	0.210503	8	0.788595
Trial 1	1.3	Rep	M	0:06:06.548-0:06:06.814	ITI2	0.486077	8	1.82096
Trial 1	1.3	Rep	M	0:06:06.814-0:06:07.080	ITI2	0.572445	8	2.14452
Trial 1	1.3	Rep	M	0:06:07.080-0:06:07.346	ITI2	0.140115	8	0.524905
Trial 1	1.3	Rep	M	0:06:07.346-0:06:07.612	ITI2	0.175794	8	0.658576
Trial 1	1.3	Rep	M	0:06:07.612-0:06:07.878	ITI2	0.419518	8	1.57161
Trial 1	1.3	Rep	M	0:06:07.878-0:06:08.144	ITI2	0.250867	8	0.939807
Trial 1	1.3	Rep	M	0:06:08.144-0:06:08.410	ITI2	0.349023	8	1.30754
Trial 1	1.3	Rep	M	0:06:08.410-0:06:08.676	ITI2	0.318016	8	1.19136
Trial 1	1.3	Rep	M	0:06:08.676-0:06:08.942	ITI2	0.615641	8	2.30634
Trial 1	1.3	Rep	M	0:06:08.942-0:06:09.208	ITI2	0.344565	8	1.29082
Trial 1	1.3	Rep	M	0:06:09.208-0:06:09.474	ITI2	0.335171	8	1.25563
Trial 1	1.3	Rep	M	0:06:09.474-0:06:09.740	ITI2	0.312064	8	1.16907
Trial 1	1.3	Rep	M	0:06:09.740-0:06:10.006	ITI2	0.40082	8	1.50157
Trial 1	1.3	Rep	M	0:06:10.006-0:06:10.272	ITI2	0.355586	8	1.33212
Trial 1	1.3	Rep	M	0:06:10.272-0:06:10.538	ITI2	0.101883	8	0.381679
Trial 1	1.3	Rep	M	0:06:10.538-0:06:10.804	ITI2	0.141591	7	0.606213
Trial 1	1.3	Rep	M	0:06:10.804-0:06:11.070	ITI2	0.118549	8	0.444117
Trial 1	1.3	Rep	M	0:06:11.070-0:06:11.336	ITI2	0.23493	8	0.880105
Trial 1	1.3	Rep	M	0:06:11.336-0:06:11.602	ITI2	0.192818	8	0.722345
Trial 1	1.3	Rep	M	0:06:11.602-0:06:11.868	ITI2	0.16858	8	0.631545
Trial 1	1.3	Rep	M	0:06:11.868-0:06:12.134	ITI2	0.23094	8	0.865156
Trial 1	1.3	Rep	M	0:06:12.134-0:06:12.400	ITI2	0.133988	8	0.501951
Trial 1	1.3	Rep	M	0:06:12.400-0:06:12.666	ITI2	0.145113	8	0.543629
Trial 1	1.3	Rep	M	0:06:12.666-0:06:12.932	ITI2	0.0954939	8	0.357743
Trial 1	1.3	Rep	M	0:06:12.932-0:06:13.198	ITI2	0.135913	8	0.509166
Trial 1	1.3	Rep	M	0:06:13.198-0:06:13.464	ITI2	0.097932	8	0.366878
Trial 1	1.3	Rep	M	0:06:13.464-0:06:13.730	ITI2	0.0940671	8	0.352397
Trial 1	1.3	Rep	M	0:06:13.730-0:06:13.996	ITI2	0.100387	8	0.376074
Trial 1	1.3	Rep	M	0:06:13.996-0:06:14.262	ITI2	0.159942	8	0.59918
Trial 1	1.3	Rep	M	0:06:14.262-0:06:14.528	ITI2	0.101229	8	0.379232
Trial 1	1.3	Rep	M	0:06:14.528-0:06:14.794	ITI2	0.0920023	8	0.344664
Trial 1	1.3	Rep	M	0:06:14.794-0:06:15.060	ITI2	0.101076	8	0.378653
Trial 1	1.3	Rep	M	0:06:15.060-0:06:15.326	ITI2	0.134	8	0.501998
Trial 1	1.3	Rep	M	0:06:15.326-0:06:15.592	ITI2	0.236268	8	0.885115
Trial 1	1.3	Rep	M	0:06:15.592-0:06:15.858	ITI2	0.102598	8	0.38436
Trial 1	1.3	Rep	M	0:06:15.858-0:06:16.124	ITI2	0.144917	8	0.542894
Trial 1	1.3	Rep	M	0:06:16.124-0:06:16.390	ITI2	0.0800445	8	0.299868
Trial 1	1.3	Rep	M	0:06:16.390-0:06:16.656	ITI2	0.152646	8	0.571851
Trial 1	1.3	Rep	M	0:06:16.656-0:06:16.922	ITI2	0.0798068	8	0.298975
Trial 1	1.3	Rep	M	0:06:16.922-0:06:17.188	ITI2	0.10879	8	0.407556
Trial 1	1.3	Rep	M	0:06:17.188-0:06:17.454	ITI2	0.0963598	8	0.360987
Trial 1	1.3	Rep	M	0:06:17.454-0:06:17.720	ITI2	0.163977	8	0.614296
Trial 1	1.3	Rep	M	0:06:17.720-0:06:17.986	ITI2	0.120588	8	0.451754
Trial 1	1.3	Rep	M	0:06:17.986-0:06:18.252	ITI2	0.188217	8	0.705106
Trial 1	1.3	Rep	M	0:06:18.252-0:06:18.518	ITI2	0.262636	8	0.983899
Trial 1	1.3	Rep	M	0:06:18.518-0:06:18.784	ITI2	0.109478	8	0.410132
Trial 1	1.3	Rep	M	0:06:18.784-0:06:19.050	ITI2	0.130271	8	0.488025
Trial 1	1.3	Rep	M	0:06:19.050-0:06:19.316	ITI2	0.0660966	8	0.247616
Trial 1	1.3	Rep	M	0:06:19.316-0:06:19.582	ITI2	0.107364	8	0.402211
Trial 1	1.3	Rep	M	0:06:19.582-0:06:19.848	ITI2	0.16733	8	0.626861
Trial 1	1.3	Rep	M	0:06:19.848-0:06:20.114	ITI2	0.218463	8	0.818411
Trial 1	1.3	Rep	M	0:06:20.114-0:06:20.380	ITI2	0.0914221	7	0.391416
Trial 1	1.3	Rep	M	0:06:20.380-0:06:20.646	ITI2	0.0939652	8	0.352018
Trial 1	1.3	Rep	M	0:06:20.646-0:06:20.912	ITI2	0.186105	8	0.697194
Trial 1	1.3	Rep	M	0:06:20.912-0:06:21.178	ITI2	0.124954	8	0.468108
Trial 1	1.3	Rep	M	0:06:21.178-0:06:21.444	ITI2	0.134781	8	0.504924
Trial 1	1.3	Rep	M	0:06:21.444-0:06:21.710	ITI2	0.111848	8	0.419011
Trial 1	1.3	Rep	M	0:06:21.710-0:06:21.976	ITI2	0.119866	8	0.449053
Trial 1	1.3	Rep	M	0:06:21.976-0:06:22.242	ITI2	0.123439	8	0.462432
Trial 1	1.3	Rep	M	0:06:22.242-0:06:22.508	ITI2	0.149545	8	0.560232
Trial 1	1.3	Rep	M	0:06:22.508-0:06:22.774	ITI2	0.218878	8	0.819972
Trial 1	1.3	Rep	M	0:06:22.774-0:06:23.040	ITI2	0.34703	8	1.30006
Trial 1	1.3	Rep	M	0:06:23.040-0:06:23.306	ITI2	0.188924	8	0.707761
Trial 1	1.3	Rep	M	0:06:23.306-0:06:23.572	ITI2	0.162667	8	0.609388
Trial 1	1.3	Rep	M	0:06:23.572-0:06:23.838	ITI2	0.229698	8	0.860504
Trial 1	1.3	Rep	M	0:06:23.838-0:06:24.104	ITI2	0.181657	8	0.680536
Trial 1	1.3	Rep	M	0:06:24.104-0:06:24.370	ITI2	0.192034	8	0.719406
Trial 1	1.3	Rep	M	0:06:24.370-0:06:24.636	ITI2	0.297196	8	1.11337
Trial 1	1.3	Rep	M	0:06:24.636-0:06:24.902	ITI2	0.232037	8	0.869265
Trial 1	1.3	Rep	M	0:06:24.902-0:06:25.168	ITI2	0.139438	8	0.522366
Trial 1	1.3	Rep	M	0:06:25.168-0:06:25.434	ITI2	0.109943	8	0.411874
Trial 1	1.3	Rep	M	0:06:25.434-0:06:25.700	ITI2	0.262843	8	0.98467
Trial 1	1.3	Rep	M	0:06:25.700-0:06:25.966	ITI2	0.255482	8	0.957103
Trial 1	1.3	Rep	M	0:06:25.966-0:06:26.232	ITI2	0.203212	8	0.761288
Trial 1	1.3	Rep	M	0:06:26.232-0:06:26.498	ITI2	0.0739765	8	0.277133
Trial 1	1.3	Rep	M	0:06:26.498-0:06:26.764	ITI2	0.117306	8	0.439458
Trial 1	1.3	Rep	M	0:06:26.764-0:06:27.030	ITI2	0.219758	8	0.823269
Trial 1	1.3	Rep	M	0:06:27.030-0:06:27.296	ITI2	0.130283	8	0.488074
Trial 1	1.3	Rep	M	0:06:27.296-0:06:27.562	ITI2	0.114924	8	0.430533
Trial 1	1.3	Rep	M	0:06:27.562-0:06:27.828	ITI2	0.183566	8	0.687683
Trial 1	1.3	Rep	M	0:06:27.828-0:06:28.094	ITI2	0.187023	8	0.700635
Trial 1	1.3	Rep	M	0:06:28.094-0:06:28.360	ITI2	0.14706	8	0.550923
Trial 1	1.3	Rep	M	0:06:28.360-0:06:28.626	ITI2	0.158319	8	0.593105
Trial 1	1.3	Rep	M	0:06:28.626-0:06:28.892	ITI2	0.154238	8	0.577812
Trial 1	1.3	Rep	M	0:06:28.892-0:06:29.158	ITI2	0.182195	8	0.682547
Trial 1	1.3	Rep	M	0:06:29.158-0:06:29.424	ITI2	0.171556	8	0.642695
Trial 1	1.3	Rep	M	0:06:29.424-0:06:29.690	ITI2	0.163165	8	0.611256
Trial 1	1.3	Rep	M	0:06:29.690-0:06:29.956	ITI2	0.204541	7	0.875727
Trial 1	1.3	Rep	M	0:06:29.956-0:06:30.222	ITI2	0.0893795	8	0.334838
Trial 1	1.3	Rep	M	0:06:30.222-0:06:30.488	CS3a	0.143394	8	0.537191
Trial 1	1.3	Rep	M	0:06:30.488-0:06:30.754	CS3a	0.0884221	8	0.33125
Trial 1	1.3	Rep	M	0:06:30.754-0:06:31.020	CS3a	0.0670411	8	0.251152
Trial 1	1.3	Rep	M	0:06:31.020-0:06:31.286	CS3a	0.0285267	8	0.106868
Trial 1	1.3	Rep	M	0:06:31.286-0:06:31.552	CS3a	0.0655403	8	0.24553
Trial 1	1.3	Rep	M	0:06:31.552-0:06:31.818	CS3a	0.118153	8	0.442627
Trial 1	1.3	Rep	M	0:06:31.818-0:06:32.084	CS3a	0.150943	8	0.565466
Trial 1	1.3	Rep	M	0:06:32.084-0:06:32.350	CS3a	0.151311	8	0.566849
Trial 1	1.3	Rep	M	0:06:32.350-0:06:32.616	CS3a	0.0286924	8	0.107489
Trial 1	1.3	Rep	M	0:06:32.616-0:06:32.882	CS3a	0.1143	8	0.428194
Trial 1	1.3	Rep	M	0:06:32.882-0:06:33.148	CS3a	0.0764665	8	0.286461
Trial 1	1.3	Rep	M	0:06:33.148-0:06:33.414	CS3a	0.0480956	8	0.180177
Trial 1	1.3	Rep	M	0:06:33.414-0:06:33.680	CS3a	0.0940402	8	0.352298
Trial 1	1.3	Rep	M	0:06:33.680-0:06:33.946	CS3a	0.0669867	8	0.25095
Trial 1	1.3	Rep	M	0:06:33.946-0:06:34.212	CS3a	0.175486	8	0.65741
Trial 1	1.3	Rep	M	0:06:34.212-0:06:34.478	CS3a	0.044718	8	0.167525
Trial 1	1.3	Rep	M	0:06:34.478-0:06:34.744	CS3a	0.168272	8	0.63039
Trial 1	1.3	Rep	M	0:06:34.744-0:06:35.010	CS3a	0.10397	8	0.389502
Trial 1	1.3	Rep	M	0:06:35.010-0:06:35.276	CS3a	0.251189	8	0.941016
Trial 1	1.3	Rep	M	0:06:35.276-0:06:35.542	CS3a	0.344901	8	1.29209
Trial 1	1.3	Rep	M	0:06:35.542-0:06:35.808	CS3a	0.248881	8	0.932371
Trial 1	1.3	Rep	M	0:06:35.808-0:06:36.074	CS3a	0.18646	8	0.698529
Trial 1	1.3	Rep	M	0:06:36.074-0:06:36.340	CS3a	0.0959497	8	0.359451
Trial 1	1.3	Rep	M	0:06:36.340-0:06:36.606	CS3a	0.198944	8	0.745291
Trial 1	1.3	Rep	M	0:06:36.606-0:06:36.872	CS3a	0.0657455	8	0.2463
Trial 1	1.3	Rep	M	0:06:36.872-0:06:37.138	CS3a	0.0785625	8	0.294313
Trial 1	1.3	Rep	M	0:06:37.138-0:06:37.404	CS3a	0.0766429	8	0.287122
Trial 1	1.3	Rep	M	0:06:37.404-0:06:37.670	CS3a	0.139838	8	0.523871
Trial 1	1.3	Rep	M	0:06:37.670-0:06:37.936	CS3a	0.0503399	8	0.188585
Trial 1	1.3	Rep	M	0:06:37.936-0:06:38.202	CS3a	0.0906144	8	0.339464
Trial 1	1.3	Rep	M	0:06:38.202-0:06:38.468	CS3a	0.112089	8	0.419911
Trial 1	1.3	Rep	M	0:06:38.468-0:06:38.734	CS3a	0.0456348	8	0.170958
Trial 1	1.3	Rep	M	0:06:38.734-0:06:39.000	CS3a	0.0942128	8	0.352946
Trial 1	1.3	Rep	M	0:06:39.000-0:06:39.266	CS3a	0.0730524	8	0.273671
Trial 1	1.3	Rep	M	0:06:39.266-0:06:39.532	CS3a	0.1352	7	0.578846
Trial 1	1.3	Rep	M	0:06:39.532-0:06:39.798	CS3a	0.0313383	8	0.117402
Trial 1	1.3	Rep	M	0:06:39.798-0:06:40.064	CS3a	0.109202	8	0.409097
Trial 1	1.3	Rep	M	0:06:40.064-0:06:40.330	CS3b	0.174171	8	0.652491
Trial 1	1.3	Rep	M	0:06:40.330-0:06:40.596	CS3b	0.238381	8	0.893032
Trial 1	1.3	Rep	M	0:06:40.596-0:06:40.862	CS3b	0.226472	8	0.848414
Trial 1	1.3	Rep	M	0:06:40.862-0:06:41.128	CS3b	0.177064	8	0.663326
Trial 1	1.3	Rep	M	0:06:41.128-0:06:41.394	CS3b	0.140598	8	0.526716
Trial 1	1.3	Rep	M	0:06:41.394-0:06:41.660	CS3b	0.15451	8	0.578833
Trial 1	1.3	Rep	M	0:06:41.660-0:06:41.926	CS3b	0.127822	8	0.478851
Trial 1	1.3	Rep	M	0:06:41.926-0:06:42.192	CS3b	0.0876655	8	0.328416
Trial 1	1.3	Rep	M	0:06:42.192-0:06:42.458	CS3b	0.156801	8	0.587419
Trial 1	1.3	Rep	M	0:06:42.458-0:06:42.724	CS3b	0.0585057	8	0.219177
Trial 1	1.3	Rep	M	0:06:42.724-0:06:42.990	CS3b	0.0526993	8	0.197426
Trial 1	1.3	Rep	M	0:06:42.990-0:06:43.256	CS3b	0.112683	8	0.422139
Trial 1	1.3	Rep	M	0:06:43.256-0:06:43.522	CS3b	0.0887673	8	0.332545
Trial 1	1.3	Rep	M	0:06:43.522-0:06:43.788	CS3b	0.130974	8	0.49066
Trial 1	1.3	Rep	M	0:06:43.788-0:06:44.054	CS3b	0.0720791	8	0.270026
Trial 1	1.3	Rep	M	0:06:44.054-0:06:44.320	CS3b	0.210811	8	0.789755
Trial 1	1.3	Rep	M	0:06:44.320-0:06:44.586	CS3b	0.14097	8	0.528108
Trial 1	1.3	Rep	M	0:06:44.586-0:06:44.852	CS3b	0.12334	8	0.462063
Trial 1	1.3	Rep	M	0:06:44.852-0:06:45.118	CS3b	0.0506657	8	0.189807
Trial 1	1.3	Rep	M	0:06:45.118-0:06:45.384	CS3b	0.0779823	8	0.292142
Trial 1	1.3	Rep	M	0:06:45.384-0:06:45.650	CS3b	0.0926916	8	0.347246
Trial 1	1.3	Rep	M	0:06:45.650-0:06:45.916	CS3b	0.06454	8	0.241782
Trial 1	1.3	Rep	M	0:06:45.916-0:06:46.182	CS3b	0.133081	8	0.498553
Trial 1	1.3	Rep	M	0:06:46.182-0:06:46.448	CS3b	0.112708	8	0.422232
Trial 1	1.3	Rep	M	0:06:46.448-0:06:46.714	CS3b	0.345679	8	1.295
Trial 1	1.3	Rep	M	0:06:46.714-0:06:46.980	CS3b	0.285503	8	1.06956
Trial 1	1.3	Rep	M	0:06:46.980-0:06:47.246	CS3b	0.21748	8	0.814734
Trial 1	1.3	Rep	M	0:06:47.246-0:06:47.512	CS3b	0.103557	8	0.387948
Trial 1	1.3	Rep	M	0:06:47.512-0:06:47.778	CS3b	0.0752057	8	0.28174
Trial 1	1.3	Rep	M	0:06:47.778-0:06:48.044	CS3b	0.198649	8	0.744186
Trial 1	1.3	Rep	M	0:06:48.044-0:06:48.310	CS3b	0.1077	8	0.403477
Trial 1	1.3	Rep	M	0:06:48.310-0:06:48.576	CS3b	0.198731	8	0.744493
Trial 1	1.3	Rep	M	0:06:48.576-0:06:48.842	CS3b	0.0552319	7	0.236471
Trial 1	1.3	Rep	M	0:06:48.842-0:06:49.108	CS3b	0.167345	8	0.62691
Trial 1	1.3	Rep	M	0:06:49.108-0:06:49.374	CS3b	0.120559	8	0.451646
Trial 1	1.3	Rep	M	0:06:49.374-0:06:49.640	CS3b	0.132618	8	0.496819
Trial 1	1.3	Rep	M	0:06:49.640-0:06:49.906	CS3b	0.0381557	8	0.142941
Trial 1	1.3	Rep	M	0:06:49.906-0:06:50.172	CS3b	0.0821657	8	0.307813
Trial 1	1.3	Rep	M	0:06:50.172-0:06:50.438	IT3	0.198696	8	0.744369
Trial 1	1.3	Rep	M	0:06:50.438-0:06:50.704	IT3	0.179114	8	0.671007
Trial 1	1.3	Rep	M	0:06:50.704-0:06:50.970	IT3	0.116988	8	0.438264
Trial 1	1.3	Rep	M	0:06:50.970-0:06:51.236	IT3	0.139649	8	0.523158
Trial 1	1.3	Rep	M	0:06:51.236-0:06:51.502	IT3	0.186367	8	0.698177
Trial 1	1.3	Rep	M	0:06:51.502-0:06:51.768	IT3	0.0693192	8	0.259686
Trial 1	1.3	Rep	M	0:06:51.768-0:06:52.034	IT3	0.0825257	8	0.309164
Trial 1	1.3	Rep	M	0:06:52.034-0:06:52.300	IT3	0.0559582	8	0.209634
Trial 1	1.3	Rep	M	0:06:52.300-0:06:52.566	IT3	0.044182	8	0.165518
Trial 1	1.3	Rep	M	0:06:52.566-0:06:52.832	IT3	0.111047	8	0.416011
Trial 1	1.3	Rep	M	0:06:52.832-0:06:53.098	IT3	0.108989	8	0.408299
Trial 1	1.3	Rep	M	0:06:53.098-0:06:53.364	IT3	0.203755	8	0.763319
Trial 1	1.3	Rep	M	0:06:53.364-0:06:53.630	IT3	0.0822362	8	0.308076
Trial 1	1.3	Rep	M	0:06:53.630-0:06:53.896	IT3	0.147459	8	0.552414
Trial 1	1.3	Rep	M	0:06:53.896-0:06:54.162	IT3	0.0613083	8	0.229675
Trial 1	1.3	Rep	M	0:06:54.162-0:06:54.428	IT3	0.141184	8	0.528908
Trial 1	1.3	Rep	M	0:06:54.428-0:06:54.694	IT3	0.130184	8	0.4877
Trial 1	1.3	Rep	M	0:06:54.694-0:06:54.960	IT3	0.0601672	8	0.2254
Trial 1	1.3	Rep	M	0:06:54.960-0:06:55.226	IT3	0.136996	8	0.513219
Trial 1	1.3	Rep	M	0:06:55.226-0:06:55.492	IT3	0.0416585	8	0.156062
Trial 1	1.3	Rep	M	0:06:55.492-0:06:55.758	IT3	0.109224	8	0.409179
Trial 1	1.3	Rep	M	0:06:55.758-0:06:56.024	IT3	0.109245	8	0.409257
Trial 1	1.3	Rep	M	0:06:56.024-0:06:56.290	IT3	0.255004	8	0.955311
Trial 1	1.3	Rep	M	0:06:56.290-0:06:56.556	IT3	0.0235886	8	0.0883685
Trial 1	1.3	Rep	M	0:06:56.556-0:06:56.822	IT3	0.114122	8	0.427528
Trial 1	1.3	Rep	M	0:06:56.822-0:06:57.088	IT3	0.187839	8	0.703688
Trial 1	1.3	Rep	M	0:06:57.088-0:06:57.354	IT3	0.0730862	8	0.273798
Trial 1	1.3	Rep	M	0:06:57.354-0:06:57.620	IT3	0.128459	8	0.481237
Trial 1	1.3	Rep	M	0:06:57.620-0:06:57.886	IT3	0.0576853	8	0.216104
Trial 1	1.3	Rep	M	0:06:57.886-0:06:58.152	IT3	0.155448	8	0.582351
Trial 1	1.3	Rep	M	0:06:58.152-0:06:58.418	IT3	0.193727	7	0.829424
Trial 1	1.3	Rep	M	0:06:58.418-0:06:58.684	IT3	0.405448	8	1.51892
Trial 1	1.3	Rep	M	0:06:58.684-0:06:58.950	IT3	0.342909	8	1.28462
Trial 1	1.3	Rep	M	0:06:58.950-0:06:59.216	IT3	0.125485	8	0.470098
Trial 1	1.3	Rep	M	0:06:59.216-0:06:59.482	IT3	0.236952	8	0.88768
Trial 1	1.3	Rep	M	0:06:59.482-0:06:59.748	IT3	0.118312	8	0.443228
Trial 1	1.3	Rep	M	0:06:59.748-0:07:00.014	IT3	0.105515	8	0.395283
Trial 1	1.3	Rep	M	0:07:00.014-0:07:00.280	IT3	0.222657	8	0.834132
Trial 1	1.3	Rep	M	0:07:00.280-0:07:00.546	IT3	0.270698	8	1.0141
Trial 1	1.3	Rep	M	0:07:00.546-0:07:00.812	IT3	0.222799	8	0.834662
Trial 1	1.3	Rep	M	0:07:00.812-0:07:01.078	IT3	0.207159	8	0.776065
Trial 1	1.3	Rep	M	0:07:01.078-0:07:01.344	IT3	0.241284	8	0.903913
Trial 1	1.3	Rep	M	0:07:01.344-0:07:01.610	IT3	0.165473	8	0.619904
Trial 1	1.3	Rep	M	0:07:01.610-0:07:01.876	IT3	0.133438	8	0.499892
Trial 1	1.3	Rep	M	0:07:01.876-0:07:02.142	IT3	0.0508237	8	0.190398
Trial 1	1.3	Rep	M	0:07:02.142-0:07:02.408	IT3	0.187044	8	0.700717
Trial 1	1.3	Rep	M	0:07:02.408-0:07:02.674	IT3	0.0233684	8	0.0875437
Trial 1	1.3	Rep	M	0:07:02.674-0:07:02.940	IT3	0.193785	8	0.725967
Trial 1	1.3	Rep	M	0:07:02.940-0:07:03.206	IT3	0.0549761	8	0.205954
Trial 1	1.3	Rep	M	0:07:03.206-0:07:03.472	IT3	0.126643	8	0.474436
Trial 1	1.3	Rep	M	0:07:03.472-0:07:03.738	IT3	0.123422	8	0.462368
Trial 1	1.3	Rep	M	0:07:03.738-0:07:04.004	IT3	0.0549019	8	0.205677
Trial 1	1.3	Rep	M	0:07:04.004-0:07:04.270	IT3	0.198118	8	0.742197
Trial 1	1.3	Rep	M	0:07:04.270-0:07:04.536	IT3	0.0701143	8	0.262665
Trial 1	1.3	Rep	M	0:07:04.536-0:07:04.802	IT3	0.157739	8	0.590927
Trial 1	1.3	Rep	M	0:07:04.802-0:07:05.068	IT3	0.112731	8	0.422318
Trial 1	1.3	Rep	M	0:07:05.068-0:07:05.334	IT3	0.556511	8	2.08484
Trial 1	1.3	Rep	M	0:07:05.334-0:07:05.600	IT3	0.30714	8	1.15062
Trial 1	1.3	Rep	M	0:07:05.600-0:07:05.866	IT3	0.271762	8	1.01809
Trial 1	1.3	Rep	M	0:07:05.866-0:07:06.132	IT3	0.248522	8	0.931027
Trial 1	1.3	Rep	M	0:07:06.132-0:07:06.398	IT3	0.222061	8	0.831897
Trial 1	1.3	Rep	M	0:07:06.398-0:07:06.664	IT3	0.149832	8	0.561309
Trial 1	1.3	Rep	M	0:07:06.664-0:07:06.930	IT3	0.235428	8	0.881973
Trial 1	1.3	Rep	M	0:07:06.930-0:07:07.196	IT3	0.160693	8	0.601996
Trial 1	1.3	Rep	M	0:07:07.196-0:07:07.462	IT3	0.100154	8	0.375203
Trial 1	1.3	Rep	M	0:07:07.462-0:07:07.728	IT3	0.118717	8	0.444742
Trial 1	1.3	Rep	M	0:07:07.728-0:07:07.994	IT3	0.204241	7	0.874445
Trial 1	1.3	Rep	M	0:07:07.994-0:07:08.260	IT3	0.306669	8	1.14886
Trial 1	1.3	Rep	M	0:07:08.260-0:07:08.526	IT3	0.3836	8	1.43706
Trial 1	1.3	Rep	M	0:07:08.526-0:07:08.792	IT3	0.293748	8	1.10045
Trial 1	1.3	Rep	M	0:07:08.792-0:07:09.058	IT3	0.426946	8	1.59945
Trial 1	1.3	Rep	M	0:07:09.058-0:07:09.324	IT3	0.315926	8	1.18354
Trial 1	1.3	Rep	M	0:07:09.324-0:07:09.590	IT3	0.365967	8	1.37101
Trial 1	1.3	Rep	M	0:07:09.590-0:07:09.856	IT3	0.19474	8	0.729547
Trial 1	1.3	Rep	M	0:07:09.856-0:07:10.122	IT3	0.210057	8	0.786924
Trial 1	1.3	Rep	M	0:07:10.122-0:07:10.388	IT3	0.138235	8	0.517862
Trial 1	1.3	Rep	M	0:07:10.388-0:07:10.654	IT3	0.114522	8	0.429027
Trial 1	1.3	Rep	M	0:07:10.654-0:07:10.920	IT3	0.221157	8	0.82851
Trial 1	1.3	Rep	M	0:07:10.920-0:07:11.186	IT3	0.0965165	8	0.361574
Trial 1	1.3	Rep	M	0:07:11.186-0:07:11.452	IT3	0.142747	8	0.534768
Trial 1	1.3	Rep	M	0:07:11.452-0:07:11.718	IT3	0.0580293	8	0.217394
Trial 1	1.3	Rep	M	0:07:11.718-0:07:11.984	IT3	0.117771	8	0.441201
Trial 1	1.3	Rep	M	0:07:11.984-0:07:12.250	IT3	0.143497	8	0.537579
Trial 1	1.3	Rep	M	0:07:12.250-0:07:12.516	IT3	0.119613	8	0.448099
Trial 1	1.3	Rep	M	0:07:12.516-0:07:12.782	IT3	0.0773126	8	0.28963
Trial 1	1.3	Rep	M	0:07:12.782-0:07:13.048	IT3	0.217144	8	0.813482
Trial 1	1.3	Rep	M	0:07:13.048-0:07:13.314	IT3	0.103599	8	0.388105
Trial 1	1.3	Rep	M	0:07:13.314-0:07:13.580	IT3	0.112044	8	0.419745
Trial 1	1.3	Rep	M	0:07:13.580-0:07:13.846	IT3	0.330994	8	1.23998
Trial 1	1.3	Rep	M	0:07:13.846-0:07:14.112	IT3	0.342443	8	1.28288
Trial 1	1.3	Rep	M	0:07:14.112-0:07:14.378	IT3	0.479575	8	1.7966
Trial 1	1.3	Rep	M	0:07:14.378-0:07:14.644	IT3	0.171757	8	0.643442
Trial 1	1.3	Rep	M	0:07:14.644-0:07:14.910	IT3	0.0564879	8	0.211619
Trial 1	1.3	Rep	M	0:07:14.910-0:07:15.176	IT3	0.04464	8	0.167234
Trial 1	1.3	Rep	M	0:07:15.176-0:07:15.442	IT3	0.0265294	8	0.0993859
Trial 1	1.3	Rep	M	0:07:15.442-0:07:15.708	IT3	0.0575271	8	0.215511
Trial 1	1.3	Rep	M	0:07:15.708-0:07:15.974	IT3	0.0536105	8	0.20084
Trial 1	1.3	Rep	M	0:07:15.974-0:07:16.240	IT3	0.384519	8	1.4405
Trial 1	1.3	Rep	M	0:07:16.240-0:07:16.506	IT3	0.679485	8	2.54551
Trial 1	1.3	Rep	M	0:07:16.506-0:07:16.772	IT3	0.241825	8	0.905935
Trial 1	1.3	Rep	M	0:07:16.772-0:07:17.038	IT3	0.159143	8	0.596191
Trial 1	1.3	Rep	M	0:07:17.038-0:07:17.304	IT3	0.20041	8	0.75078
Trial 1	1.3	Rep	M	0:07:17.304-0:07:17.570	IT3	0.185969	7	0.796214
Trial 1	1.3	Rep	M	0:07:17.570-0:07:17.836	IT3	0.15875	8	0.59472
Trial 1	1.3	Rep	M	0:07:17.836-0:07:18.102	IT3	0.188345	8	0.705593
Trial 1	1.3	Rep	M	0:07:18.102-0:07:18.368	IT3	0.161922	8	0.606598
Trial 1	1.3	Rep	M	0:07:18.368-0:07:18.634	IT3	0.26036	8	0.975374
Trial 1	1.3	Rep	M	0:07:18.634-0:07:18.900	IT3	0.0834449	8	0.312605
Trial 1	1.3	Rep	M	0:07:18.900-0:07:19.166	IT3	0.434259	8	1.62685
Trial 1	1.3	Rep	M	0:07:19.166-0:07:19.432	IT3	0.439192	8	1.64532
Trial 1	1.3	Rep	M	0:07:19.432-0:07:19.698	IT3	0.301444	8	1.12929
Trial 1	1.3	Rep	M	0:07:19.698-0:07:19.964	IT3	0.157863	8	0.591391
Trial 1	1.3	Rep	M	0:07:19.964-0:07:20.230	IT3	0.0902431	8	0.338073
Trial 1	1.3	Rep	M	0:07:20.230-0:07:20.496	IT3	0.258191	8	0.967258
Trial 1	1.3	Rep	M	0:07:20.496-0:07:20.762	IT3	0.216493	8	0.811042
Trial 1	1.3	Rep	M	0:07:20.762-0:07:21.028	IT3	0.252061	8	0.94428
Trial 1	1.3	Rep	M	0:07:21.028-0:07:21.294	IT3	0.0376721	8	0.141129
Trial 1	1.3	Rep	M	0:07:21.294-0:07:21.560	IT3	0.218299	8	0.817801
Trial 1	1.3	Rep	M	0:07:21.560-0:07:21.826	IT3	0.237868	8	0.891118
Trial 1	1.3	Rep	M	0:07:21.826-0:07:22.092	IT3	0.196414	8	0.735813
Trial 1	1.3	Rep	M	0:07:22.092-0:07:22.358	IT3	0.0941947	8	0.352877
Trial 1	1.3	Rep	M	0:07:22.358-0:07:22.624	IT3	0.0787325	8	0.294952
Trial 1	1.3	Rep	M	0:07:22.624-0:07:22.890	IT3	0.278392	8	1.04292
Trial 1	1.3	Rep	M	0:07:22.890-0:07:23.156	IT3	0.0693464	8	0.259789
Trial 1	1.3	Rep	M	0:07:23.156-0:07:23.422	IT3	0.0751952	8	0.281699
Trial 1	1.3	Rep	M	0:07:23.422-0:07:23.688	IT3	0.050933	8	0.190809
Trial 1	1.3	Rep	M	0:07:23.688-0:07:23.954	IT3	0.13557	8	0.50788
Trial 1	1.3	Rep	M	0:07:23.954-0:07:24.220	IT3	0.256712	8	0.961712
Trial 1	1.3	Rep	M	0:07:24.220-0:07:24.486	IT3	0.124657	8	0.466999
Trial 1	1.3	Rep	M	0:07:24.486-0:07:24.752	IT3	0.0658306	8	0.246617
Trial 1	1.3	Rep	M	0:07:24.752-0:07:25.018	IT3	0.0478446	8	0.179238
Trial 1	1.3	Rep	M	0:07:25.018-0:07:25.284	IT3	0.122079	8	0.45734
Trial 1	1.3	Rep	M	0:07:25.284-0:07:25.550	IT3	0.0833323	8	0.312184
Trial 1	1.3	Rep	M	0:07:25.550-0:07:25.816	IT3	0.304973	8	1.14252
Trial 1	1.3	Rep	M	0:07:25.816-0:07:26.082	IT3	0.599117	8	2.24444
Trial 1	1.3	Rep	M	0:07:26.082-0:07:26.348	IT3	0.679617	8	2.54603
Trial 1	1.3	Rep	M	0:07:26.348-0:07:26.614	IT3	0.108322	8	0.4058
Trial 1	1.3	Rep	M	0:07:26.614-0:07:26.880	IT3	0.815036	7	3.48953
Trial 1	1.3	Rep	M	0:07:26.880-0:07:27.146	IT3	0.628536	8	2.35465
Trial 1	1.3	Rep	M	0:07:27.146-0:07:27.412	IT3	0.75434	8	2.82595
Trial 1	1.3	Rep	M	0:07:27.412-0:07:27.678	IT3	0.771176	8	2.889
Trial 1	1.3	Rep	M	0:07:27.678-0:07:27.944	IT3	0.420594	8	1.57566
Trial 1	1.3	Rep	M	0:07:27.944-0:07:28.210	IT3	0.459071	8	1.7198
Trial 1	1.3	Rep	M	0:07:28.210-0:07:28.476	IT3	1.28862	8	4.82746
Trial 1	1.3	Rep	M	0:07:28.476-0:07:28.742	IT3	1.05983	8	3.97042
Trial 1	1.3	Rep	M	0:07:28.742-0:07:29.008	IT3	0.701142	8	2.62667
Trial 1	1.3	Rep	M	0:07:29.008-0:07:29.274	IT3	0.217119	8	0.813384
Trial 1	1.3	Rep	M	0:07:29.274-0:07:29.540	IT3	0.390673	8	1.46356
Trial 1	1.3	Rep	M	0:07:29.540-0:07:29.806	IT3	0.562799	8	2.10839
Trial 1	1.3	Rep	M	0:07:29.806-0:07:30.072	IT3	0.884343	8	3.31296
Trial 1	1.3	Rep	M	0:07:30.072-0:07:30.338	IT3	1.04626	8	3.91954
Trial 1	1.3	Rep	M	0:07:30.338-0:07:30.604	IT3	1.44343	8	5.40744
Trial 1	1.3	Rep	M	0:07:30.604-0:07:30.870	IT3	0.917982	8	3.43898
Trial 1	1.3	Rep	M	0:07:30.870-0:07:31.136	IT3	0.314128	8	1.1768
Trial 1	1.3	Rep	M	0:07:31.136-0:07:31.402	IT3	0.279385	8	1.04665
Trial 1	1.3	Rep	M	0:07:31.402-0:07:31.668	IT3	0.126202	8	0.472782
Trial 1	1.3	Rep	M	0:07:31.668-0:07:31.934	IT3	0.120667	8	0.452052
Trial 1	1.3	Rep	M	0:07:31.934-0:07:32.200	IT3	0.0961473	8	0.360192
Trial 1	1.3	Rep	M	0:07:32.200-0:07:32.466	IT3	0.247797	8	0.928311
Trial 1	1.3	Rep	M	0:07:32.466-0:07:32.732	IT3	0.15869	8	0.594493
Trial 1	1.3	Rep	M	0:07:32.732-0:07:32.998	IT3	0.208331	8	0.780457
Trial 1	1.3	Rep	M	0:07:32.998-0:07:33.264	IT3	0.104367	8	0.390986
Trial 1	1.3	Rep	M	0:07:33.264-0:07:33.530	IT3	0.176745	8	0.662127
Trial 1	1.3	Rep	M	0:07:33.530-0:07:33.796	IT3	0.117045	8	0.438479
Trial 1	1.3	Rep	M	0:07:33.796-0:07:34.062	IT3	0.282084	8	1.05676
Trial 1	1.3	Rep	M	0:07:34.062-0:07:34.328	IT3	0.173819	8	0.651168
Trial 1	1.3	Rep	M	0:07:34.328-0:07:34.594	IT3	0.494975	8	1.85432
Trial 1	1.3	Rep	M	0:07:34.594-0:07:34.860	IT3	0.366415	8	1.37268
Trial 1	1.3	Rep	M	0:07:34.860-0:07:35.126	IT3	0.0820105	8	0.307232
Trial 1	1.3	Rep	M	0:07:35.126-0:07:35.392	IT3	0.169434	8	0.634745
Trial 1	1.3	Rep	M	0:07:35.392-0:07:35.658	IT3	0.19447	8	0.728532
Trial 1	1.3	Rep	M	0:07:35.658-0:07:35.924	IT3	0.287602	8	1.07744
Trial 1	1.3	Rep	M	0:07:35.924-0:07:36.190	IT3	0.481888	8	1.80527
Trial 1	1.3	Rep	M	0:07:36.190-0:07:36.456	IT3	0.305697	7	1.30882
Trial 1	1.3	Rep	M	0:07:36.456-0:07:36.722	IT3	0.291031	8	1.09028
Trial 1	1.3	Rep	M	0:07:36.722-0:07:36.988	IT3	0.367847	8	1.37805
Trial 1	1.3	Rep	M	0:07:36.988-0:07:37.254	IT3	0.0754044	8	0.282484
Trial 1	1.3	Rep	M	0:07:37.254-0:07:37.520	IT3	0.201636	8	0.755379
Trial 1	1.3	Rep	M	0:07:37.520-0:07:37.786	IT3	0.172068	8	0.644607
Trial 1	1.3	Rep	M	0:07:37.786-0:07:38.052	IT3	0.371931	8	1.39335
Trial 1	1.3	Rep	M	0:07:38.052-0:07:38.318	IT3	0.451698	8	1.69216
Trial 1	1.3	Rep	M	0:07:38.318-0:07:38.584	IT3	0.374366	8	1.40247
Trial 1	1.3	Rep	M	0:07:38.584-0:07:38.850	IT3	0.236209	8	0.884903
Trial 1	1.3	Rep	M	0:07:38.850-0:07:39.116	IT3	0.224622	8	0.841488
Trial 1	1.3	Rep	M	0:07:39.116-0:07:39.382	IT3	0.0477753	8	0.17898
Trial 1	1.3	Rep	M	0:07:39.382-0:07:39.648	IT3	0.112599	8	0.42182
Trial 1	1.3	Rep	M	0:07:39.648-0:07:39.914	IT3	0.20224	8	0.757637
Trial 1	1.3	Rep	M	0:07:39.914-0:07:40.180	IT3	0.308742	8	1.15663
Trial 1	1.3	Rep	M	0:07:40.180-0:07:40.446	IT3	0.186279	8	0.697847
Trial 1	1.3	Rep	M	0:07:40.446-0:07:40.712	IT3	0.197425	8	0.739605
Trial 1	1.3	Rep	M	0:07:40.712-0:07:40.978	IT3	0.172948	8	0.647908
Trial 1	1.3	Rep	M	0:07:40.978-0:07:41.244	IT3	0.149054	8	0.558391
Trial 1	1.3	Rep	M	0:07:41.244-0:07:41.510	IT3	0.238246	8	0.892532
Trial 1	1.3	Rep	M	0:07:41.510-0:07:41.776	IT3	0.115573	8	0.432964
Trial 1	1.3	Rep	M	0:07:41.776-0:07:42.042	IT3	0.140369	8	0.525859
Trial 1	1.3	Rep	M	0:07:42.042-0:07:42.308	IT3	0.137988	8	0.516936
Trial 1	1.3	Rep	M	0:07:42.308-0:07:42.574	IT3	0.124402	8	0.466037
Trial 1	1.3	Rep	M	0:07:42.574-0:07:42.840	IT3	0.0586829	8	0.219843
Trial 1	1.3	Rep	M	0:07:42.840-0:07:43.106	IT3	0.0525888	8	0.197009
Trial 1	1.3	Rep	M	0:07:43.106-0:07:43.372	IT3	0.074994	8	0.280947
Trial 1	1.3	Rep	M	0:07:43.372-0:07:43.638	IT3	0.0785786	8	0.294375
Trial 1	1.3	Rep	M	0:07:43.638-0:07:43.904	IT3	0.19957	8	0.747637
Trial 1	1.3	Rep	M	0:07:43.904-0:07:44.170	IT3	0.104757	8	0.392445
Trial 1	1.3	Rep	M	0:07:44.170-0:07:44.436	IT3	0.188231	8	0.705161
Trial 1	1.3	Rep	M	0:07:44.436-0:07:44.702	IT3	0.0399258	8	0.149573
Trial 1	1.3	Rep	M	0:07:44.702-0:07:44.968	IT3	0.0956781	8	0.358433
Trial 1	1.3	Rep	M	0:07:44.968-0:07:45.234	IT3	0.062186	8	0.232964
Trial 1	1.3	Rep	M	0:07:45.234-0:07:45.500	IT3	0.0791208	8	0.296407
Trial 1	1.3	Rep	M	0:07:45.500-0:07:45.766	IT3	0.0724204	8	0.271304
Trial 1	1.3	Rep	M	0:07:45.766-0:07:46.032	IT3	0.0480591	7	0.205761
Trial 1	1.3	Rep	M	0:07:46.032-0:07:46.298	IT3	0.0620689	8	0.232525
Trial 1	1.3	Rep	M	0:07:46.298-0:07:46.564	IT3	0.0977024	8	0.366016
Trial 1	1.3	Rep	M	0:07:46.564-0:07:46.830	IT3	0.185826	8	0.69615
Trial 1	1.3	Rep	M	0:07:46.830-0:07:47.096	IT3	0.0991969	8	0.37162
Trial 1	1.3	Rep	M	0:07:47.096-0:07:47.362	IT3	0.154042	8	0.577082
Trial 1	1.3	Rep	M	0:07:47.362-0:07:47.628	IT3	0.0938702	8	0.351663
Trial 1	1.3	Rep	M	0:07:47.628-0:07:47.894	IT3	0.104565	8	0.391726
Trial 1	1.3	Rep	M	0:07:47.894-0:07:48.160	IT3	0.0885754	8	0.331826
Trial 1	1.3	Rep	M	0:07:48.160-0:07:48.426	IT3	0.0833116	8	0.312104
Trial 1	1.3	Rep	M	0:07:48.426-0:07:48.692	IT3	0.084548	8	0.316736
Trial 1	1.3	Rep	M	0:07:48.692-0:07:48.958	IT3	0.0216306	8	0.0810336
Trial 1	1.3	Rep	M	0:07:48.958-0:07:49.224	IT3	0.0631422	8	0.236547
Trial 1	1.3	Rep	M	0:07:49.224-0:07:49.490	IT3	0.121987	8	0.456994
Trial 1	1.3	Rep	M	0:07:49.490-0:07:49.756	IT3	0.214519	8	0.803641
Trial 1	1.3	Rep	M	0:07:49.756-0:07:50.022	IT3	0.0782675	8	0.29321
Trial 1	1.3	Rep	M	0:07:50.022-0:07:50.288	IT3	0.1266	8	0.474277
Trial 1	1.3	Rep	M	0:07:50.288-0:07:50.554	IT3	0.139032	8	0.520845
Trial 1	1.3	Rep	M	0:07:50.554-0:07:50.820	IT3	0.108284	8	0.405656
Trial 1	1.3	Rep	M	0:07:50.820-0:07:51.086	IT3	0.122084	8	0.457357
Trial 1	1.3	Rep	M	0:07:51.086-0:07:51.352	IT3	0.0964536	8	0.361339
Trial 1	1.3	Rep	M	0:07:51.352-0:07:51.618	IT3	0.121517	8	0.455237
Trial 1	1.3	Rep	M	0:07:51.618-0:07:51.884	IT3	0.13948	8	0.522527
Trial 1	1.3	Rep	M	0:07:51.884-0:07:52.150	IT3	0.168846	8	0.632536
Trial 1	1.3	Rep	M	0:07:52.150-0:07:52.416	IT3	0.116423	8	0.436149
Trial 1	1.3	Rep	M	0:07:52.416-0:07:52.682	IT3	0.261353	8	0.979093
Trial 1	1.3	Rep	M	0:07:52.682-0:07:52.948	IT3	0.214966	8	0.80532
Trial 1	1.3	Rep	M	0:07:52.948-0:07:53.214	IT3	0.416116	8	1.55887
Trial 1	1.3	Rep	M	0:07:53.214-0:07:53.480	IT3	0.148074	8	0.554719
Trial 1	1.3	Rep	M	0:07:53.480-0:07:53.746	IT3	0.082093	8	0.307541
Trial 1	1.3	Rep	M	0:07:53.746-0:07:54.012	IT3	0.0907512	8	0.339976
Trial 1	1.3	Rep	M	0:07:54.012-0:07:54.278	IT3	0.0731021	8	0.273859
Trial 1	1.3	Rep	M	0:07:54.278-0:07:54.544	IT3	0.0520545	8	0.195009
Trial 1	1.3	Rep	M	0:07:54.544-0:07:54.810	IT3	0.0501426	8	0.187846
Trial 1	1.3	Rep	M	0:07:54.810-0:07:55.076	IT3	0.0466098	8	0.174612
Trial 1	1.3	Rep	M	0:07:55.076-0:07:55.342	IT3	0.0999356	7	0.427867
Trial 1	1.3	Rep	M	0:07:55.342-0:07:55.608	IT3	0.0590976	8	0.221395
Trial 1	1.3	Rep	M	0:07:55.608-0:07:55.874	IT3	0.114043	8	0.427239
Trial 1	1.3	Rep	M	0:07:55.874-0:07:56.140	IT3	0.0682732	8	0.255768
Trial 1	1.3	Rep	M	0:07:56.140-0:07:56.406	IT3	0.0556003	8	0.208293
Trial 1	1.3	Rep	M	0:07:56.406-0:07:56.672	IT3	0.0802381	8	0.30059
Trial 1	1.3	Rep	M	0:07:56.672-0:07:56.938	IT3	0.141043	8	0.528383
Trial 1	1.3	Rep	M	0:07:56.938-0:07:57.204	IT3	0.305379	8	1.14403
Trial 1	1.3	Rep	M	0:07:57.204-0:07:57.470	IT3	0.117885	8	0.441625
Trial 1	1.3	Rep	M	0:07:57.470-0:07:57.736	IT3	0.0627534	8	0.23509
Trial 1	1.3	Rep	M	0:07:57.736-0:07:58.002	IT3	0.0829535	8	0.310764
Trial 1	1.3	Rep	M	0:07:58.002-0:07:58.268	IT3	0.0882646	8	0.330659
Trial 1	1.3	Rep	M	0:07:58.268-0:07:58.534	IT3	0.16554	8	0.620155
Trial 1	1.3	Rep	M	0:07:58.534-0:07:58.800	IT3	0.121675	8	0.455823
Trial 1	1.3	Rep	M	0:07:58.800-0:07:59.066	IT3	0.0483876	8	0.181272
Trial 1	1.3	Rep	M	0:07:59.066-0:07:59.332	IT3	0.0506215	8	0.189641
Trial 1	1.3	Rep	M	0:07:59.332-0:07:59.598	IT3	0.0303317	8	0.11363
Trial 1	1.3	Rep	M	0:07:59.598-0:07:59.864	IT3	0.020025	8	0.0750193
Trial 1	1.3	Rep	M	0:07:59.864-0:08:00.130	IT3	0.118715	8	0.444734
Trial 1	1.3	Rep	M	0:08:00.130-0:08:00.396	IT3	0.0893121	8	0.334586
Trial 1	1.3	Rep	M	0:08:00.396-0:08:00.662	IT3	0.112862	8	0.42281
Trial 1	1.3	Rep	M	0:08:00.662-0:08:00.928	IT3	0.0299696	8	0.112274
Trial 1	1.3	Rep	M	0:08:00.928-0:08:01.194	IT3	0.096917	8	0.363073
Trial 1	1.3	Rep	M	0:08:01.194-0:08:01.460	IT3	0.0735624	8	0.275582
Trial 1	1.3	Rep	M	0:08:01.460-0:08:01.726	IT3	0.0943031	8	0.353283
Trial 1	1.3	Rep	M	0:08:01.726-0:08:01.992	IT3	0.157139	8	0.588681
Trial 1	1.3	Rep	M	0:08:01.992-0:08:02.258	IT3	0.272159	8	1.01957
Trial 1	1.3	Rep	M	0:08:02.258-0:08:02.524	IT3	0.117697	8	0.440922
Trial 1	1.3	Rep	M	0:08:02.524-0:08:02.790	IT3	0.157984	8	0.591846
Trial 1	1.3	Rep	M	0:08:02.790-0:08:03.056	IT3	0.113045	8	0.423494
Trial 1	1.3	Rep	M	0:08:03.056-0:08:03.322	IT3	0.0569865	8	0.213485
Trial 1	1.3	Rep	M	0:08:03.322-0:08:03.588	IT3	0.0750568	8	0.28118
Trial 1	1.3	Rep	M	0:08:03.588-0:08:03.854	IT3	0.0631845	8	0.236704
Trial 1	1.3	Rep	M	0:08:03.854-0:08:04.120	IT3	0.0728817	8	0.273032
Trial 1	1.3	Rep	M	0:08:04.120-0:08:04.386	IT3	0.0743915	8	0.278689
Trial 1	1.3	Rep	M	0:08:04.386-0:08:04.652	IT3	0.0392647	8	0.147095
Trial 1	1.3	Rep	M	0:08:04.652-0:08:04.918	IT3	0.151608	7	0.649094
Trial 1	1.3	Rep	M	0:08:04.918-0:08:05.184	IT3	0.0898271	8	0.336515
Trial 1	1.3	Rep	M	0:08:05.184-0:08:05.450	IT3	0.0818325	8	0.306568
Trial 1	1.3	Rep	M	0:08:05.450-0:08:05.716	IT3	0.14494	8	0.542981
Trial 1	1.3	Rep	M	0:08:05.716-0:08:05.982	IT3	0.119489	8	0.447633
Trial 1	1.3	Rep	M	0:08:05.982-0:08:06.248	IT3	0.02869	8	0.107479
Trial 1	1.3	Rep	M	0:08:06.248-0:08:06.514	IT3	0.0460089	8	0.17236
Trial 1	1.3	Rep	M	0:08:06.514-0:08:06.780	IT3	0.0767732	8	0.287611
Trial 1	1.3	Rep	M	0:08:06.780-0:08:07.046	IT3	0.109878	8	0.411626
Trial 1	1.3	Rep	M	0:08:07.046-0:08:07.312	IT3	0.230515	8	0.863567
Trial 1	1.3	Rep	M	0:08:07.312-0:08:07.578	IT3	0.276975	8	1.03761
Trial 1	1.3	Rep	M	0:08:07.578-0:08:07.844	IT3	0.192883	8	0.722588
Trial 1	1.3	Rep	M	0:08:07.844-0:08:08.110	IT3	0.109366	8	0.409711
Trial 1	1.3	Rep	M	0:08:08.110-0:08:08.376	IT3	0.0687441	8	0.257533
Trial 1	1.3	Rep	M	0:08:08.376-0:08:08.642	IT3	0.0336615	8	0.126105
Trial 1	1.3	Rep	M	0:08:08.642-0:08:08.908	IT3	0.0643052	8	0.240901
Trial 1	1.3	Rep	M	0:08:08.908-0:08:09.174	IT3	0.0738065	8	0.276497
Trial 1	1.3	Rep	M	0:08:09.174-0:08:09.440	IT3	0.0331393	8	0.124148
Trial 1	1.3	Rep	M	0:08:09.440-0:08:09.706	IT3	0.0589131	8	0.220704
Trial 1	1.3	Rep	M	0:08:09.706-0:08:09.972	IT3	0.0371934	8	0.139336
Trial 1	1.3	Rep	M	0:08:09.972-0:08:10.238	IT3	0.0921265	8	0.345128
Trial 1	1.3	Rep	M	0:08:10.238-0:08:10.504	IT3	0.0344926	8	0.129218
Trial 1	1.3	Rep	M	0:08:10.504-0:08:10.770	IT3	0.0769653	8	0.288331
Trial 1	1.3	Rep	M	0:08:10.770-0:08:11.036	IT3	0.0747838	8	0.280158
Trial 1	1.3	Rep	M	0:08:11.036-0:08:11.302	IT3	0.104566	8	0.39173
Trial 1	1.3	Rep	M	0:08:11.302-0:08:11.568	IT3	0.121171	8	0.453931
Trial 1	1.3	Rep	M	0:08:11.568-0:08:11.834	IT3	0.114284	8	0.428137
Trial 1	1.3	Rep	M	0:08:11.834-0:08:12.100	IT3	0.177398	8	0.66458
Trial 1	1.3	Rep	M	0:08:12.100-0:08:12.366	IT3	0.0440366	8	0.164972
Trial 1	1.3	Rep	M	0:08:12.366-0:08:12.632	IT3	0.140391	8	0.525939
Trial 1	1.3	Rep	M	0:08:12.632-0:08:12.898	IT3	0.162898	8	0.610256
Trial 1	1.3	Rep	M	0:08:12.898-0:08:13.164	IT3	0.0980349	8	0.367262
Trial 1	1.3	Rep	M	0:08:13.164-0:08:13.430	IT3	0.0480823	8	0.180128
Trial 1	1.3	Rep	M	0:08:13.430-0:08:13.696	IT3	0.071895	8	0.269338
Trial 1	1.3	Rep	M	0:08:13.696-0:08:13.962	IT3	0.063588	8	0.238217
Trial 1	1.3	Rep	M	0:08:13.962-0:08:14.228	IT3	0.172882	8	0.647657
Trial 1	1.3	Rep	M	0:08:14.228-0:08:14.494	IT3	0.237301	7	1.01598
Trial 1	1.3	Rep	M	0:08:14.494-0:08:14.760	IT3	0.21219	8	0.79492
Trial 1	1.3	Rep	M	0:08:14.760-0:08:15.026	IT3	0.501417	8	1.87843
Trial 1	1.3	Rep	M	0:08:15.026-0:08:15.292	IT3	0.42696	8	1.5995
Trial 1	1.3	Rep	M	0:08:15.292-0:08:15.558	IT3	0.684005	8	2.56245
Trial 1	1.3	Rep	M	0:08:15.558-0:08:15.824	IT3	0.65753	8	2.46327
Trial 1	1.3	Rep	M	0:08:15.824-0:08:16.090	IT3	0.489873	8	1.8352
Trial 1	1.3	Rep	M	0:08:16.090-0:08:16.356	IT3	0.297601	8	1.11488
Trial 1	1.3	Rep	M	0:08:16.356-0:08:16.622	IT3	0.397293	8	1.48835
Trial 1	1.3	Rep	M	0:08:16.622-0:08:16.888	IT3	0.774377	8	2.90101
Trial 1	1.3	Rep	M	0:08:16.888-0:08:17.154	IT3	0.676262	8	2.53344
Trial 1	1.3	Rep	M	0:08:17.154-0:08:17.420	IT3	0.73631	8	2.75841
Trial 1	1.3	Rep	M	0:08:17.420-0:08:17.686	IT3	1.97501	8	7.39888
Trial 1	1.3	Rep	M	0:08:17.686-0:08:17.952	IT3	1.18067	8	4.42306
Trial 1	1.3	Rep	M	0:08:17.952-0:08:18.218	IT3	0.525653	8	1.96923
Trial 1	1.3	Rep	M	0:08:18.218-0:08:18.484	IT3	0.254312	8	0.952711
Trial 1	1.3	Rep	M	0:08:18.484-0:08:18.750	IT3	1.44694	8	5.42062
Trial 1	1.3	Rep	M	0:08:18.750-0:08:19.016	IT3	0.571758	8	2.14194
Trial 1	1.3	Rep	M	0:08:19.016-0:08:19.282	IT3	0.499979	8	1.87304
Trial 1	1.3	Rep	M	0:08:19.282-0:08:19.548	IT3	0.948153	8	3.55202
Trial 1	1.3	Rep	M	0:08:19.548-0:08:19.814	IT3	1.14399	8	4.28565
Trial 1	1.3	Rep	M	0:08:19.814-0:08:20.080	IT3	2.71961	8	10.1884
Trial 1	1.3	Rep	M	0:08:20.080-0:08:20.346	IT3	2.91853	8	10.9335
Trial 1	1.3	Rep	M	0:08:20.346-0:08:20.612	IT3	1.70225	8	6.37704
Trial 1	1.3	Rep	M	0:08:20.612-0:08:20.878	IT3	1.28882	8	4.82825
Trial 1	1.3	Rep	M	0:08:20.878-0:08:21.144	IT3	1.93326	8	7.24247
Trial 1	1.3	Rep	M	0:08:21.144-0:08:21.410	IT3	1.10194	8	4.12812
Trial 1	1.3	Rep	M	0:08:21.410-0:08:21.676	IT3	0.371693	8	1.39245
Trial 1	1.3	Rep	M	0:08:21.676-0:08:21.942	IT3	1.15097	8	4.3118
Trial 1	1.3	Rep	M	0:08:21.942-0:08:22.208	IT3	1.08874	8	4.07872
Trial 1	1.3	Rep	M	0:08:22.208-0:08:22.474	IT3	0.235888	8	0.883693
Trial 1	1.3	Rep	M	0:08:22.474-0:08:22.740	IT3	0.119862	8	0.449032
Trial 1	1.3	Rep	M	0:08:22.740-0:08:23.006	IT3	0.295211	8	1.10593
Trial 1	1.3	Rep	M	0:08:23.006-0:08:23.272	IT3	0.318442	8	1.19296
Trial 1	1.3	Rep	M	0:08:23.272-0:08:23.538	IT3	0.922645	8	3.45645
Trial 1	1.3	Rep	M	0:08:23.538-0:08:23.804	IT3	0.75623	8	2.83302
Trial 1	1.3	Rep	M	0:08:23.804-0:08:24.070	IT3	0.486881	7	2.08454
Trial 1	1.3	Rep	M	0:08:24.070-0:08:24.336	IT3	0.678594	8	2.54218
Trial 1	1.3	Rep	M	0:08:24.336-0:08:24.602	IT3	1.15269	8	4.31825
Trial 1	1.3	Rep	M	0:08:24.602-0:08:24.868	IT3	1.95048	8	7.30698
Trial 1	1.3	Rep	M	0:08:24.868-0:08:25.134	IT3	1.38397	8	5.1847
Trial 1	1.3	Rep	M	0:08:25.134-0:08:25.400	CS4a	0.493592	8	1.84911
Trial 1	1.3	Rep	M	0:08:25.400-0:08:25.666	CS4a	0.306276	8	1.14739
Trial 1	1.3	Rep	M	0:08:25.666-0:08:25.932	CS4a	0.192999	8	0.723019
Trial 1	1.3	Rep	M	0:08:25.932-0:08:26.198	CS4a	0.139348	8	0.522029
Trial 1	1.3	Rep	M	0:08:26.198-0:08:26.464	CS4a	0.0865024	8	0.32406
Trial 1	1.3	Rep	M	0:08:26.464-0:08:26.730	CS4a	0.137464	8	0.514973
Trial 1	1.3	Rep	M	0:08:26.730-0:08:26.996	CS4a	0.163547	8	0.612691
Trial 1	1.3	Rep	M	0:08:26.996-0:08:27.262	CS4a	0.151023	8	0.56577
Trial 1	1.3	Rep	M	0:08:27.262-0:08:27.528	CS4a	0.114556	8	0.429153
Trial 1	1.3	Rep	M	0:08:27.528-0:08:27.794	CS4a	0.165262	8	0.619114
Trial 1	1.3	Rep	M	0:08:27.794-0:08:28.060	CS4a	0.0888564	8	0.332878
Trial 1	1.3	Rep	M	0:08:28.060-0:08:28.326	CS4a	0.199502	8	0.747381
Trial 1	1.3	Rep	M	0:08:28.326-0:08:28.592	CS4a	0.0602435	8	0.225687
Trial 1	1.3	Rep	M	0:08:28.592-0:08:28.858	CS4a	0.134119	8	0.502442
Trial 1	1.3	Rep	M	0:08:28.858-0:08:29.124	CS4a	0.128733	8	0.482266
Trial 1	1.3	Rep	M	0:08:29.124-0:08:29.390	CS4a	0.156785	8	0.587358
Trial 1	1.3	Rep	M	0:08:29.390-0:08:29.656	CS4a	0.059564	8	0.223143
Trial 1	1.3	Rep	M	0:08:29.656-0:08:29.922	CS4a	0.122488	8	0.458868
Trial 1	1.3	Rep	M	0:08:29.922-0:08:30.188	CS4a	0.0847812	8	0.317614
Trial 1	1.3	Rep	M	0:08:30.188-0:08:30.454	CS4a	0.070111	8	0.262652
Trial 1	1.3	Rep	M	0:08:30.454-0:08:30.720	CS4a	0.167791	8	0.628586
Trial 1	1.3	Rep	M	0:08:30.720-0:08:30.986	CS4a	0.0741493	8	0.277782
Trial 1	1.3	Rep	M	0:08:30.986-0:08:31.252	CS4a	0.18525	8	0.69399
Trial 1	1.3	Rep	M	0:08:31.252-0:08:31.518	CS4a	0.0807629	8	0.302558
Trial 1	1.3	Rep	M	0:08:31.518-0:08:31.784	CS4a	0.116561	8	0.436666
Trial 1	1.3	Rep	M	0:08:31.784-0:08:32.050	CS4a	0.0950001	8	0.355892
Trial 1	1.3	Rep	M	0:08:32.050-0:08:32.316	CS4a	0.117078	8	0.438606
Trial 1	1.3	Rep	M	0:08:32.316-0:08:32.582	CS4a	0.0997272	8	0.373602
Trial 1	1.3	Rep	M	0:08:32.582-0:08:32.848	CS4a	0.140632	8	0.52684
Trial 1	1.3	Rep	M	0:08:32.848-0:08:33.114	CS4a	0.16452	8	0.616334
Trial 1	1.3	Rep	M	0:08:33.114-0:08:33.380	CS4a	0.0967732	7	0.414327
Trial 1	1.3	Rep	M	0:08:33.380-0:08:33.646	CS4a	0.123677	8	0.463325
Trial 1	1.3	Rep	M	0:08:33.646-0:08:33.912	CS4a	0.092801	8	0.347656
Trial 1	1.3	Rep	M	0:08:33.912-0:08:34.178	CS4a	0.0820935	8	0.307541
Trial 1	1.3	Rep	M	0:08:34.178-0:08:34.444	CS4a	0.0627385	8	0.235036
Trial 1	1.3	Rep	M	0:08:34.444-0:08:34.710	CS4a	0.0427537	8	0.160167
Trial 1	1.3	Rep	M	0:08:34.710-0:08:34.976	CS4a	0.133552	8	0.500321
Trial 1	1.3	Rep	M	0:08:34.976-0:08:35.242	CS4a	0.126214	8	0.472835
Trial 1	1.3	Rep	M	0:08:35.242-0:08:35.508	CS4b	7.28349	8	27.2858
Trial 1	1.3	Rep	M	0:08:35.508-0:08:35.774	CS4b	8.57078	8	32.1084
Trial 1	1.3	Rep	M	0:08:35.774-0:08:36.040	CS4b	4.34766	8	16.2874
Trial 1	1.3	Rep	M	0:08:36.040-0:08:36.306	CS4b	0.678975	8	2.5436
Trial 1	1.3	Rep	M	0:08:36.306-0:08:36.572	CS4b	0.399548	8	1.49681
Trial 1	1.3	Rep	M	0:08:36.572-0:08:36.838	CS4b	0.217558	8	0.815025
Trial 1	1.3	Rep	M	0:08:36.838-0:08:37.104	CS4b	0.110508	8	0.413994
Trial 1	1.3	Rep	M	0:08:37.104-0:08:37.370	CS4b	0.133134	8	0.498752
Trial 1	1.3	Rep	M	0:08:37.370-0:08:37.636	CS4b	0.0832085	8	0.311718
Trial 1	1.3	Rep	M	0:08:37.636-0:08:37.902	CS4b	0.136887	8	0.512811
Trial 1	1.3	Rep	M	0:08:37.902-0:08:38.168	CS4b	0.0667431	8	0.250035
Trial 1	1.3	Rep	M	0:08:38.168-0:08:38.434	CS4b	0.109378	8	0.409759
Trial 1	1.3	Rep	M	0:08:38.434-0:08:38.700	CS4b	0.0625902	8	0.234477
Trial 1	1.3	Rep	M	0:08:38.700-0:08:38.966	CS4b	0.115708	8	0.43347
Trial 1	1.3	Rep	M	0:08:38.966-0:08:39.232	CS4b	0.0944034	8	0.353662
Trial 1	1.3	Rep	M	0:08:39.232-0:08:39.498	CS4b	0.115807	8	0.433841
Trial 1	1.3	Rep	M	0:08:39.498-0:08:39.764	CS4b	0.191402	8	0.717036
Trial 1	1.3	Rep	M	0:08:39.764-0:08:40.030	CS4b	0.108977	8	0.408257
Trial 1	1.3	Rep	M	0:08:40.030-0:08:40.296	CS4b	0.148807	8	0.557468
Trial 1	1.3	Rep	M	0:08:40.296-0:08:40.562	CS4b	0.102722	8	0.384823
Trial 1	1.3	Rep	M	0:08:40.562-0:08:40.828	CS4b	0.180361	8	0.675676
Trial 1	1.3	Rep	M	0:08:40.828-0:08:41.094	CS4b	0.0993906	8	0.372343
Trial 1	1.3	Rep	M	0:08:41.094-0:08:41.360	CS4b	0.0821059	8	0.30759
Trial 1	1.3	Rep	M	0:08:41.360-0:08:41.626	CS4b	0.111307	8	0.416983
Trial 1	1.3	Rep	M	0:08:41.626-0:08:41.892	CS4b	0.15157	8	0.567823
Trial 1	1.3	Rep	M	0:08:41.892-0:08:42.158	CS4b	0.170459	8	0.638583
Trial 1	1.3	Rep	M	0:08:42.158-0:08:42.424	CS4b	0.133121	8	0.498705
Trial 1	1.3	Rep	M	0:08:42.424-0:08:42.690	CS4b	0.158652	8	0.594348
Trial 1	1.3	Rep	M	0:08:42.690-0:08:42.956	CS4b	0.068193	7	0.291964
Trial 1	1.3	Rep	M	0:08:42.956-0:08:43.222	CS4b	0.169824	8	0.6362
Trial 1	1.3	Rep	M	0:08:43.222-0:08:43.488	CS4b	0.204403	8	0.76575
Trial 1	1.3	Rep	M	0:08:43.488-0:08:43.754	CS4b	0.123373	8	0.462186
Trial 1	1.3	Rep	M	0:08:43.754-0:08:44.020	CS4b	0.098993	8	0.370855
Trial 1	1.3	Rep	M	0:08:44.020-0:08:44.286	CS4b	0.077401	8	0.289963
Trial 1	1.3	Rep	M	0:08:44.286-0:08:44.552	CS4b	0.161714	8	0.605819
Trial 1	1.3	Rep	M	0:08:44.552-0:08:44.818	CS4b	0.163142	8	0.61117
Trial 1	1.3	Rep	M	0:08:44.818-0:08:45.084	CS4b	0.193033	8	0.723145
Trial 1	1.3	Rep	M	0:08:45.084-0:08:45.350	IT4	0.0740198	8	0.277298
Trial 1	1.3	Rep	M	0:08:45.350-0:08:45.616	IT4	0.181096	8	0.678435
Trial 1	1.3	Rep	M	0:08:45.616-0:08:45.882	IT4	0.0828891	8	0.310523
Trial 1	1.3	Rep	M	0:08:45.882-0:08:46.148	IT4	0.0909129	8	0.340583
Trial 1	1.3	Rep	M	0:08:46.148-0:08:46.414	IT4	0.134064	8	0.502236
Trial 1	1.3	Rep	M	0:08:46.414-0:08:46.680	IT4	0.0849138	8	0.318112
Trial 1	1.3	Rep	M	0:08:46.680-0:08:46.946	IT4	0.20725	8	0.776409
Trial 1	1.3	Rep	M	0:08:46.946-0:08:47.212	IT4	0.125045	8	0.468452
Trial 1	1.3	Rep	M	0:08:47.212-0:08:47.478	IT4	0.159903	8	0.599041
Trial 1	1.3	Rep	M	0:08:47.478-0:08:47.744	IT4	0.0470007	8	0.176077
Trial 1	1.3	Rep	M	0:08:47.744-0:08:48.010	IT4	0.113435	8	0.424957
Trial 1	1.3	Rep	M	0:08:48.010-0:08:48.276	IT4	0.158532	8	0.5939
Trial 1	1.3	Rep	M	0:08:48.276-0:08:48.542	IT4	0.0571107	8	0.21395
Trial 1	1.3	Rep	M	0:08:48.542-0:08:48.808	IT4	0.0622955	8	0.233374
Trial 1	1.3	Rep	M	0:08:48.808-0:08:49.074	IT4	0.0951741	8	0.356545
Trial 1	1.3	Rep	M	0:08:49.074-0:08:49.340	IT4	0.138144	8	0.517521
Trial 1	1.3	Rep	M	0:08:49.340-0:08:49.606	IT4	0.145169	8	0.543842
Trial 1	1.3	Rep	M	0:08:49.606-0:08:49.872	IT4	0.149854	8	0.56139
Trial 1	1.3	Rep	M	0:08:49.872-0:08:50.138	IT4	0.0971355	8	0.363897
Trial 1	1.3	Rep	M	0:08:50.138-0:08:50.404	IT4	0.15278	8	0.572349
Trial 1	1.3	Rep	M	0:08:50.404-0:08:50.670	IT4	0.0535762	8	0.200709
[truncated: 153,413 more rows]
