# Supplementary material for: Conditional and unconditional components of aversively motivated freezing, flight and darting in mice
Source: eLife. 2022 May 26;11:e75663. doi: 10.7554/eLife.75663 (PMC9173745; doi:10.7554/eLife.75663)
Supplement: Figure 3—source data 1. [file elife-75663-fig3-data1.xlsx]

## Sheet: Sheet1
Raw velocity data, extracted via ethovision, which is fed to R source code 1 to detect and extract darts, and to produce velocity traces
Showing Data from Test Day 3 for all animals in Experiment 1
Used to calculate Darts/minute as seen in Figure 2
Used to produce velocity traces as seen in Figure 3
Trial	Animal	Group	Sex	TimeStamp	StimPeriod	Distance_cm	Samples	Velocity
Trial 1	1.3	Rep	M	Start-0:00:00.266	BL	19.9518	7	85.4215
Trial 1	1.3	Rep	M	0:00:00.266-0:00:00.532	BL	44.0498	8	165.023
Trial 1	1.3	Rep	M	0:00:00.532-0:00:00.798	BL	1.67223	8	6.26458
Trial 1	1.3	Rep	M	0:00:00.798-0:00:01.064	BL	0.65888	8	2.46834
Trial 1	1.3	Rep	M	0:00:01.064-0:00:01.330	BL	0.748719	8	2.80488
Trial 1	1.3	Rep	M	0:00:01.330-0:00:01.596	BL	0.402521	8	1.50794
Trial 1	1.3	Rep	M	0:00:01.596-0:00:01.862	BL	0.60014	8	2.24828
Trial 1	1.3	Rep	M	0:00:01.862-0:00:02.128	BL	0.476138	8	1.78372
Trial 1	1.3	Rep	M	0:00:02.128-0:00:02.394	BL	1.59935	8	5.99157
Trial 1	1.3	Rep	M	0:00:02.394-0:00:02.660	BL	1.55875	8	5.83948
Trial 1	1.3	Rep	M	0:00:02.660-0:00:02.926	BL	0.796842	8	2.98517
Trial 1	1.3	Rep	M	0:00:02.926-0:00:03.192	BL	1.70484	8	6.38674
Trial 1	1.3	Rep	M	0:00:03.192-0:00:03.458	BL	1.2546	8	4.70002
Trial 1	1.3	Rep	M	0:00:03.458-0:00:03.724	BL	0.959916	8	3.59608
Trial 1	1.3	Rep	M	0:00:03.724-0:00:03.990	BL	1.34141	8	5.02524
Trial 1	1.3	Rep	M	0:00:03.990-0:00:04.256	BL	0.94323	8	3.53357
Trial 1	1.3	Rep	M	0:00:04.256-0:00:04.522	BL	1.1684	8	4.3771
Trial 1	1.3	Rep	M	0:00:04.522-0:00:04.788	BL	0.613921	8	2.29989
Trial 1	1.3	Rep	M	0:00:04.788-0:00:05.054	BL	1.48459	8	5.56168
Trial 1	1.3	Rep	M	0:00:05.054-0:00:05.320	BL	0.188293	8	0.705397
Trial 1	1.3	Rep	M	0:00:05.320-0:00:05.586	BL	1.00468	8	3.76383
Trial 1	1.3	Rep	M	0:00:05.586-0:00:05.852	BL	3.01793	8	11.306
Trial 1	1.3	Rep	M	0:00:05.852-0:00:06.118	BL	1.14233	8	4.27943
Trial 1	1.3	Rep	M	0:00:06.118-0:00:06.384	BL	0.707004	8	2.64862
Trial 1	1.3	Rep	M	0:00:06.384-0:00:06.650	BL	1.4304	8	5.35863
Trial 1	1.3	Rep	M	0:00:06.650-0:00:06.916	BL	1.97896	8	7.4137
Trial 1	1.3	Rep	M	0:00:06.916-0:00:07.182	BL	2.17365	8	8.14302
Trial 1	1.3	Rep	M	0:00:07.182-0:00:07.448	BL	0.703786	8	2.63655
Trial 1	1.3	Rep	M	0:00:07.448-0:00:07.714	BL	0.626976	8	2.34882
Trial 1	1.3	Rep	M	0:00:07.714-0:00:07.980	BL	2.19687	8	8.23001
Trial 1	1.3	Rep	M	0:00:07.980-0:00:08.246	BL	3.15424	8	11.8166
Trial 1	1.3	Rep	M	0:00:08.246-0:00:08.512	BL	3.78782	8	14.1901
Trial 1	1.3	Rep	M	0:00:08.512-0:00:08.778	BL	2.64475	8	9.90788
Trial 1	1.3	Rep	M	0:00:08.778-0:00:09.044	BL	1.76495	8	6.61195
Trial 1	1.3	Rep	M	0:00:09.044-0:00:09.310	BL	0.593259	8	2.22249
Trial 1	1.3	Rep	M	0:00:09.310-0:00:09.576	BL	0.66647	7	2.85344
Trial 1	1.3	Rep	M	0:00:09.576-0:00:09.842	BL	1.18832	8	4.45176
Trial 1	1.3	Rep	M	0:00:09.842-0:00:10.108	BL	0.471615	8	1.76679
Trial 1	1.3	Rep	M	0:00:10.108-0:00:10.374	BL	0.634378	8	2.37654
Trial 1	1.3	Rep	M	0:00:10.374-0:00:10.640	BL	0.240779	8	0.902021
Trial 1	1.3	Rep	M	0:00:10.640-0:00:10.906	BL	0.33144	8	1.24166
Trial 1	1.3	Rep	M	0:00:10.906-0:00:11.172	BL	0.166384	8	0.623318
Trial 1	1.3	Rep	M	0:00:11.172-0:00:11.438	BL	0.136714	8	0.512164
Trial 1	1.3	Rep	M	0:00:11.438-0:00:11.704	BL	0.16884	8	0.632515
Trial 1	1.3	Rep	M	0:00:11.704-0:00:11.970	BL	0.175128	8	0.656077
Trial 1	1.3	Rep	M	0:00:11.970-0:00:12.236	BL	0.123573	8	0.462933
Trial 1	1.3	Rep	M	0:00:12.236-0:00:12.502	BL	0.102206	8	0.382891
Trial 1	1.3	Rep	M	0:00:12.502-0:00:12.768	BL	0.107293	8	0.401945
Trial 1	1.3	Rep	M	0:00:12.768-0:00:13.034	BL	0.168331	8	0.630608
Trial 1	1.3	Rep	M	0:00:13.034-0:00:13.300	BL	0.218625	8	0.819025
Trial 1	1.3	Rep	M	0:00:13.300-0:00:13.566	BL	0.104695	8	0.392212
Trial 1	1.3	Rep	M	0:00:13.566-0:00:13.832	BL	0.179242	8	0.671484
Trial 1	1.3	Rep	M	0:00:13.832-0:00:14.098	BL	0.178887	8	0.670155
Trial 1	1.3	Rep	M	0:00:14.098-0:00:14.364	BL	0.110773	8	0.414982
Trial 1	1.3	Rep	M	0:00:14.364-0:00:14.630	BL	0.258123	8	0.966991
Trial 1	1.3	Rep	M	0:00:14.630-0:00:14.896	BL	0.164813	8	0.617432
Trial 1	1.3	Rep	M	0:00:14.896-0:00:15.162	BL	0.199665	8	0.747999
Trial 1	1.3	Rep	M	0:00:15.162-0:00:15.428	BL	0.116433	8	0.436186
Trial 1	1.3	Rep	M	0:00:15.428-0:00:15.694	BL	0.158964	8	0.595517
Trial 1	1.3	Rep	M	0:00:15.694-0:00:15.960	BL	0.0909969	8	0.340898
Trial 1	1.3	Rep	M	0:00:15.960-0:00:16.226	BL	0.061472	8	0.230289
Trial 1	1.3	Rep	M	0:00:16.226-0:00:16.492	BL	0.085229	8	0.319288
Trial 1	1.3	Rep	M	0:00:16.492-0:00:16.758	BL	0.0738071	8	0.276499
Trial 1	1.3	Rep	M	0:00:16.758-0:00:17.024	BL	0.168549	8	0.631432
Trial 1	1.3	Rep	M	0:00:17.024-0:00:17.290	BL	0.107312	8	0.402019
Trial 1	1.3	Rep	M	0:00:17.290-0:00:17.556	BL	0.0829483	8	0.310747
Trial 1	1.3	Rep	M	0:00:17.556-0:00:17.822	BL	0.0797878	8	0.298906
Trial 1	1.3	Rep	M	0:00:17.822-0:00:18.088	BL	0.121699	8	0.455914
Trial 1	1.3	Rep	M	0:00:18.088-0:00:18.354	BL	0.217426	8	0.814531
Trial 1	1.3	Rep	M	0:00:18.354-0:00:18.620	BL	0.0966455	8	0.362057
Trial 1	1.3	Rep	M	0:00:18.620-0:00:18.886	BL	0.10338	8	0.387288
Trial 1	1.3	Rep	M	0:00:18.886-0:00:19.152	BL	0.102125	7	0.43724
Trial 1	1.3	Rep	M	0:00:19.152-0:00:19.418	BL	0.194674	8	0.729298
Trial 1	1.3	Rep	M	0:00:19.418-0:00:19.684	BL	0.0721524	8	0.2703
Trial 1	1.3	Rep	M	0:00:19.684-0:00:19.950	BL	0.143008	8	0.535743
Trial 1	1.3	Rep	M	0:00:19.950-0:00:20.216	BL	0.223256	8	0.83637
Trial 1	1.3	Rep	M	0:00:20.216-0:00:20.482	BL	0.0726567	8	0.272188
Trial 1	1.3	Rep	M	0:00:20.482-0:00:20.748	BL	0.105073	8	0.39363
Trial 1	1.3	Rep	M	0:00:20.748-0:00:21.014	BL	0.177324	8	0.664296
Trial 1	1.3	Rep	M	0:00:21.014-0:00:21.280	BL	0.164949	8	0.617944
Trial 1	1.3	Rep	M	0:00:21.280-0:00:21.546	BL	0.120683	8	0.452108
Trial 1	1.3	Rep	M	0:00:21.546-0:00:21.812	BL	0.181785	8	0.681009
Trial 1	1.3	Rep	M	0:00:21.812-0:00:22.078	BL	0.0791064	8	0.296353
Trial 1	1.3	Rep	M	0:00:22.078-0:00:22.344	BL	0.0730351	8	0.273608
Trial 1	1.3	Rep	M	0:00:22.344-0:00:22.610	BL	0.0847045	8	0.317323
Trial 1	1.3	Rep	M	0:00:22.610-0:00:22.876	BL	0.0967685	8	0.36252
Trial 1	1.3	Rep	M	0:00:22.876-0:00:23.142	BL	0.150525	8	0.563903
Trial 1	1.3	Rep	M	0:00:23.142-0:00:23.408	BL	0.177272	8	0.664106
Trial 1	1.3	Rep	M	0:00:23.408-0:00:23.674	BL	0.117697	8	0.440919
Trial 1	1.3	Rep	M	0:00:23.674-0:00:23.940	BL	0.158692	8	0.594501
Trial 1	1.3	Rep	M	0:00:23.940-0:00:24.206	BL	0.202381	8	0.75817
Trial 1	1.3	Rep	M	0:00:24.206-0:00:24.472	BL	0.102745	8	0.384909
Trial 1	1.3	Rep	M	0:00:24.472-0:00:24.738	BL	0.0947871	8	0.355097
Trial 1	1.3	Rep	M	0:00:24.738-0:00:25.004	BL	0.0585494	8	0.219341
Trial 1	1.3	Rep	M	0:00:25.004-0:00:25.270	BL	0.255075	8	0.955577
Trial 1	1.3	Rep	M	0:00:25.270-0:00:25.536	BL	0.129179	8	0.483934
Trial 1	1.3	Rep	M	0:00:25.536-0:00:25.802	BL	0.102176	8	0.38278
Trial 1	1.3	Rep	M	0:00:25.802-0:00:26.068	BL	0.18032	8	0.675525
Trial 1	1.3	Rep	M	0:00:26.068-0:00:26.334	BL	0.128692	8	0.482109
Trial 1	1.3	Rep	M	0:00:26.334-0:00:26.600	BL	0.145648	8	0.545633
Trial 1	1.3	Rep	M	0:00:26.600-0:00:26.866	BL	0.104402	8	0.391118
Trial 1	1.3	Rep	M	0:00:26.866-0:00:27.132	BL	0.149933	8	0.561688
Trial 1	1.3	Rep	M	0:00:27.132-0:00:27.398	BL	0.199814	8	0.74856
Trial 1	1.3	Rep	M	0:00:27.398-0:00:27.664	BL	0.229199	8	0.858637
Trial 1	1.3	Rep	M	0:00:27.664-0:00:27.930	BL	0.247668	8	0.927829
Trial 1	1.3	Rep	M	0:00:27.930-0:00:28.196	BL	0.152676	8	0.571963
Trial 1	1.3	Rep	M	0:00:28.196-0:00:28.462	BL	0.512309	8	1.91923
Trial 1	1.3	Rep	M	0:00:28.462-0:00:28.728	BL	0.250274	7	1.07153
Trial 1	1.3	Rep	M	0:00:28.728-0:00:28.994	BL	0.15792	8	0.591609
Trial 1	1.3	Rep	M	0:00:28.994-0:00:29.260	BL	0.131511	8	0.492669
Trial 1	1.3	Rep	M	0:00:29.260-0:00:29.526	BL	0.149657	8	0.56065
Trial 1	1.3	Rep	M	0:00:29.526-0:00:29.792	BL	0.120607	8	0.451827
Trial 1	1.3	Rep	M	0:00:29.792-0:00:30.058	BL	0.160006	8	0.599423
Trial 1	1.3	Rep	M	0:00:30.058-0:00:30.324	BL	0.164807	8	0.617413
Trial 1	1.3	Rep	M	0:00:30.324-0:00:30.590	BL	0.140473	8	0.526246
Trial 1	1.3	Rep	M	0:00:30.590-0:00:30.856	BL	0.185239	8	0.693948
Trial 1	1.3	Rep	M	0:00:30.856-0:00:31.122	BL	0.15028	8	0.562986
Trial 1	1.3	Rep	M	0:00:31.122-0:00:31.388	BL	0.117977	8	0.441969
Trial 1	1.3	Rep	M	0:00:31.388-0:00:31.654	BL	0.16542	8	0.619707
Trial 1	1.3	Rep	M	0:00:31.654-0:00:31.920	BL	0.273804	8	1.02574
Trial 1	1.3	Rep	M	0:00:31.920-0:00:32.186	BL	0.191354	8	0.716864
Trial 1	1.3	Rep	M	0:00:32.186-0:00:32.452	BL	0.195953	8	0.734087
Trial 1	1.3	Rep	M	0:00:32.452-0:00:32.718	BL	0.151996	8	0.569416
Trial 1	1.3	Rep	M	0:00:32.718-0:00:32.984	BL	0.0648478	8	0.242936
Trial 1	1.3	Rep	M	0:00:32.984-0:00:33.250	BL	0.152098	8	0.569794
Trial 1	1.3	Rep	M	0:00:33.250-0:00:33.516	BL	0.117084	8	0.438626
Trial 1	1.3	Rep	M	0:00:33.516-0:00:33.782	BL	0.160355	8	0.600729
Trial 1	1.3	Rep	M	0:00:33.782-0:00:34.048	BL	0.102655	8	0.384571
Trial 1	1.3	Rep	M	0:00:34.048-0:00:34.314	BL	0.127476	8	0.477559
Trial 1	1.3	Rep	M	0:00:34.314-0:00:34.580	BL	0.141808	8	0.531247
Trial 1	1.3	Rep	M	0:00:34.580-0:00:34.846	BL	0.164872	8	0.617654
Trial 1	1.3	Rep	M	0:00:34.846-0:00:35.112	BL	0.147248	8	0.551626
Trial 1	1.3	Rep	M	0:00:35.112-0:00:35.378	BL	0.216409	8	0.81072
Trial 1	1.3	Rep	M	0:00:35.378-0:00:35.644	BL	0.13107	8	0.491021
Trial 1	1.3	Rep	M	0:00:35.644-0:00:35.910	BL	0.0975577	8	0.365474
Trial 1	1.3	Rep	M	0:00:35.910-0:00:36.176	BL	0.104599	8	0.391856
Trial 1	1.3	Rep	M	0:00:36.176-0:00:36.442	BL	0.148981	8	0.558123
Trial 1	1.3	Rep	M	0:00:36.442-0:00:36.708	BL	0.147434	8	0.552324
Trial 1	1.3	Rep	M	0:00:36.708-0:00:36.974	BL	0.13271	8	0.497166
Trial 1	1.3	Rep	M	0:00:36.974-0:00:37.240	BL	0.0743823	8	0.278654
Trial 1	1.3	Rep	M	0:00:37.240-0:00:37.506	BL	0.182237	8	0.682704
Trial 1	1.3	Rep	M	0:00:37.506-0:00:37.772	BL	0.137818	8	0.5163
Trial 1	1.3	Rep	M	0:00:37.772-0:00:38.038	BL	0.130182	7	0.557369
Trial 1	1.3	Rep	M	0:00:38.038-0:00:38.304	BL	0.118925	8	0.445521
Trial 1	1.3	Rep	M	0:00:38.304-0:00:38.570	BL	0.19728	8	0.73906
Trial 1	1.3	Rep	M	0:00:38.570-0:00:38.836	BL	0.230616	8	0.86394
Trial 1	1.3	Rep	M	0:00:38.836-0:00:39.102	BL	0.179985	8	0.674271
Trial 1	1.3	Rep	M	0:00:39.102-0:00:39.368	BL	0.138394	8	0.518458
Trial 1	1.3	Rep	M	0:00:39.368-0:00:39.634	BL	0.12172	8	0.455992
Trial 1	1.3	Rep	M	0:00:39.634-0:00:39.900	BL	0.11745	8	0.439994
Trial 1	1.3	Rep	M	0:00:39.900-0:00:40.166	BL	0.167384	8	0.627061
Trial 1	1.3	Rep	M	0:00:40.166-0:00:40.432	BL	0.226544	8	0.848692
Trial 1	1.3	Rep	M	0:00:40.432-0:00:40.698	BL	0.151987	8	0.569382
Trial 1	1.3	Rep	M	0:00:40.698-0:00:40.964	BL	0.149357	8	0.559529
Trial 1	1.3	Rep	M	0:00:40.964-0:00:41.230	BL	0.0641064	8	0.240158
Trial 1	1.3	Rep	M	0:00:41.230-0:00:41.496	BL	0.205497	8	0.769843
Trial 1	1.3	Rep	M	0:00:41.496-0:00:41.762	BL	0.17685	8	0.662526
Trial 1	1.3	Rep	M	0:00:41.762-0:00:42.028	BL	0.134601	8	0.504251
Trial 1	1.3	Rep	M	0:00:42.028-0:00:42.294	BL	0.113981	8	0.426999
Trial 1	1.3	Rep	M	0:00:42.294-0:00:42.560	BL	0.0996539	8	0.373329
Trial 1	1.3	Rep	M	0:00:42.560-0:00:42.826	BL	0.165188	8	0.618832
Trial 1	1.3	Rep	M	0:00:42.826-0:00:43.092	BL	0.120139	8	0.450071
Trial 1	1.3	Rep	M	0:00:43.092-0:00:43.358	BL	0.211587	8	0.792654
Trial 1	1.3	Rep	M	0:00:43.358-0:00:43.624	BL	0.0693173	8	0.25968
Trial 1	1.3	Rep	M	0:00:43.624-0:00:43.890	BL	0.118472	8	0.443825
Trial 1	1.3	Rep	M	0:00:43.890-0:00:44.156	BL	0.0737093	8	0.276133
Trial 1	1.3	Rep	M	0:00:44.156-0:00:44.422	BL	0.120487	8	0.451376
Trial 1	1.3	Rep	M	0:00:44.422-0:00:44.688	BL	0.112569	8	0.421709
Trial 1	1.3	Rep	M	0:00:44.688-0:00:44.954	BL	0.121567	8	0.455418
Trial 1	1.3	Rep	M	0:00:44.954-0:00:45.220	BL	0.152767	8	0.572301
Trial 1	1.3	Rep	M	0:00:45.220-0:00:45.486	BL	0.148729	8	0.557174
Trial 1	1.3	Rep	M	0:00:45.486-0:00:45.752	BL	0.153181	8	0.573855
Trial 1	1.3	Rep	M	0:00:45.752-0:00:46.018	BL	0.0771854	8	0.289156
Trial 1	1.3	Rep	M	0:00:46.018-0:00:46.284	BL	0.064057	8	0.239974
Trial 1	1.3	Rep	M	0:00:46.284-0:00:46.550	BL	0.0853527	8	0.319751
Trial 1	1.3	Rep	M	0:00:46.550-0:00:46.816	BL	0.0551398	8	0.206567
Trial 1	1.3	Rep	M	0:00:46.816-0:00:47.082	BL	0.132507	8	0.496403
Trial 1	1.3	Rep	M	0:00:47.082-0:00:47.348	BL	0.11011	8	0.412497
Trial 1	1.3	Rep	M	0:00:47.348-0:00:47.614	BL	0.0831959	7	0.356196
Trial 1	1.3	Rep	M	0:00:47.614-0:00:47.880	BL	0.0692008	8	0.259243
Trial 1	1.3	Rep	M	0:00:47.880-0:00:48.146	BL	0.0501859	8	0.188009
Trial 1	1.3	Rep	M	0:00:48.146-0:00:48.412	BL	0.0796445	8	0.298369
Trial 1	1.3	Rep	M	0:00:48.412-0:00:48.678	BL	0.0869573	8	0.325764
Trial 1	1.3	Rep	M	0:00:48.678-0:00:48.944	BL	0.16691	8	0.625286
Trial 1	1.3	Rep	M	0:00:48.944-0:00:49.210	BL	0.189876	8	0.711321
Trial 1	1.3	Rep	M	0:00:49.210-0:00:49.476	BL	0.116646	8	0.436985
Trial 1	1.3	Rep	M	0:00:49.476-0:00:49.742	BL	0.121427	8	0.454895
Trial 1	1.3	Rep	M	0:00:49.742-0:00:50.008	BL	0.134743	8	0.504779
Trial 1	1.3	Rep	M	0:00:50.008-0:00:50.274	BL	0.144899	8	0.54283
Trial 1	1.3	Rep	M	0:00:50.274-0:00:50.540	BL	0.258918	8	0.969969
Trial 1	1.3	Rep	M	0:00:50.540-0:00:50.806	BL	0.201348	8	0.7543
Trial 1	1.3	Rep	M	0:00:50.806-0:00:51.072	BL	0.300505	8	1.12577
Trial 1	1.3	Rep	M	0:00:51.072-0:00:51.338	BL	0.260837	8	0.977164
Trial 1	1.3	Rep	M	0:00:51.338-0:00:51.604	BL	0.107418	8	0.402412
Trial 1	1.3	Rep	M	0:00:51.604-0:00:51.870	BL	0.193615	8	0.725329
Trial 1	1.3	Rep	M	0:00:51.870-0:00:52.136	BL	0.0882578	8	0.330636
Trial 1	1.3	Rep	M	0:00:52.136-0:00:52.402	BL	0.119045	8	0.445972
Trial 1	1.3	Rep	M	0:00:52.402-0:00:52.668	BL	0.0646209	8	0.242087
Trial 1	1.3	Rep	M	0:00:52.668-0:00:52.934	BL	0.106344	8	0.398392
Trial 1	1.3	Rep	M	0:00:52.934-0:00:53.200	BL	0.115481	8	0.43262
Trial 1	1.3	Rep	M	0:00:53.200-0:00:53.466	BL	0.153948	8	0.576725
Trial 1	1.3	Rep	M	0:00:53.466-0:00:53.732	BL	0.17224	8	0.645258
Trial 1	1.3	Rep	M	0:00:53.732-0:00:53.998	BL	0.250869	8	0.93982
Trial 1	1.3	Rep	M	0:00:53.998-0:00:54.264	BL	0.330787	8	1.23921
Trial 1	1.3	Rep	M	0:00:54.264-0:00:54.530	BL	0.577134	8	2.16209
Trial 1	1.3	Rep	M	0:00:54.530-0:00:54.796	BL	0.603696	8	2.26159
Trial 1	1.3	Rep	M	0:00:54.796-0:00:55.062	BL	0.693357	8	2.59749
Trial 1	1.3	Rep	M	0:00:55.062-0:00:55.328	BL	0.269934	8	1.01125
Trial 1	1.3	Rep	M	0:00:55.328-0:00:55.594	BL	0.492219	8	1.84397
Trial 1	1.3	Rep	M	0:00:55.594-0:00:55.860	BL	0.498426	8	1.86723
Trial 1	1.3	Rep	M	0:00:55.860-0:00:56.126	BL	0.634318	8	2.37631
Trial 1	1.3	Rep	M	0:00:56.126-0:00:56.392	BL	0.504779	8	1.89103
Trial 1	1.3	Rep	M	0:00:56.392-0:00:56.658	BL	0.31628	8	1.18487
Trial 1	1.3	Rep	M	0:00:56.658-0:00:56.924	BL	0.221023	8	0.828004
Trial 1	1.3	Rep	M	0:00:56.924-0:00:57.190	BL	0.241907	7	1.03571
Trial 1	1.3	Rep	M	0:00:57.190-0:00:57.456	BL	0.596209	8	2.23356
Trial 1	1.3	Rep	M	0:00:57.456-0:00:57.722	BL	0.924682	8	3.46409
Trial 1	1.3	Rep	M	0:00:57.722-0:00:57.988	BL	0.409499	8	1.53409
Trial 1	1.3	Rep	M	0:00:57.988-0:00:58.254	BL	0.252921	8	0.947502
Trial 1	1.3	Rep	M	0:00:58.254-0:00:58.520	BL	0.217102	8	0.813317
Trial 1	1.3	Rep	M	0:00:58.520-0:00:58.786	BL	0.28458	8	1.06611
Trial 1	1.3	Rep	M	0:00:58.786-0:00:59.052	BL	0.345692	8	1.29505
Trial 1	1.3	Rep	M	0:00:59.052-0:00:59.318	BL	0.235825	8	0.883458
Trial 1	1.3	Rep	M	0:00:59.318-0:00:59.584	BL	0.505816	8	1.89491
Trial 1	1.3	Rep	M	0:00:59.584-0:00:59.850	BL	1.84523	8	6.91268
Trial 1	1.3	Rep	M	0:00:59.850-0:01:00.116	BL	2.55689	8	9.57879
Trial 1	1.3	Rep	M	0:01:00.116-0:01:00.382	BL	1.98628	8	7.44111
Trial 1	1.3	Rep	M	0:01:00.382-0:01:00.648	BL	0.522279	8	1.95659
Trial 1	1.3	Rep	M	0:01:00.648-0:01:00.914	BL	0.57021	8	2.13615
Trial 1	1.3	Rep	M	0:01:00.914-0:01:01.180	BL	2.26752	8	8.49467
Trial 1	1.3	Rep	M	0:01:01.180-0:01:01.446	BL	3.49181	8	13.0812
Trial 1	1.3	Rep	M	0:01:01.446-0:01:01.712	BL	2.84113	8	10.6436
Trial 1	1.3	Rep	M	0:01:01.712-0:01:01.978	BL	2.17701	8	8.15565
Trial 1	1.3	Rep	M	0:01:01.978-0:01:02.244	BL	1.91405	8	7.17049
Trial 1	1.3	Rep	M	0:01:02.244-0:01:02.510	BL	0.548867	8	2.05619
Trial 1	1.3	Rep	M	0:01:02.510-0:01:02.776	BL	0.497792	8	1.86486
Trial 1	1.3	Rep	M	0:01:02.776-0:01:03.042	BL	0.929584	8	3.48245
Trial 1	1.3	Rep	M	0:01:03.042-0:01:03.308	BL	0.731099	8	2.73889
Trial 1	1.3	Rep	M	0:01:03.308-0:01:03.574	BL	0.312406	8	1.17035
Trial 1	1.3	Rep	M	0:01:03.574-0:01:03.840	BL	0.696133	8	2.60789
Trial 1	1.3	Rep	M	0:01:03.840-0:01:04.106	BL	0.465852	8	1.74519
Trial 1	1.3	Rep	M	0:01:04.106-0:01:04.372	BL	0.167218	8	0.626441
Trial 1	1.3	Rep	M	0:01:04.372-0:01:04.638	BL	0.201799	8	0.755996
Trial 1	1.3	Rep	M	0:01:04.638-0:01:04.904	BL	0.365247	8	1.3683
Trial 1	1.3	Rep	M	0:01:04.904-0:01:05.170	BL	0.35409	8	1.32651
Trial 1	1.3	Rep	M	0:01:05.170-0:01:05.436	BL	0.501987	8	1.88057
Trial 1	1.3	Rep	M	0:01:05.436-0:01:05.702	BL	0.191646	8	0.717953
Trial 1	1.3	Rep	M	0:01:05.702-0:01:05.968	BL	0.279855	8	1.04841
Trial 1	1.3	Rep	M	0:01:05.968-0:01:06.234	BL	0.207702	8	0.778101
Trial 1	1.3	Rep	M	0:01:06.234-0:01:06.500	BL	0.129036	8	0.4834
Trial 1	1.3	Rep	M	0:01:06.500-0:01:06.766	BL	0.15137	7	0.648076
Trial 1	1.3	Rep	M	0:01:06.766-0:01:07.032	BL	0.20641	8	0.773265
Trial 1	1.3	Rep	M	0:01:07.032-0:01:07.298	BL	0.0794202	8	0.297526
Trial 1	1.3	Rep	M	0:01:07.298-0:01:07.564	BL	0.209722	8	0.785668
Trial 1	1.3	Rep	M	0:01:07.564-0:01:07.830	BL	0.168406	8	0.630888
Trial 1	1.3	Rep	M	0:01:07.830-0:01:08.096	BL	0.251598	8	0.942549
Trial 1	1.3	Rep	M	0:01:08.096-0:01:08.362	BL	0.287467	8	1.07692
Trial 1	1.3	Rep	M	0:01:08.362-0:01:08.628	BL	0.419375	8	1.57108
Trial 1	1.3	Rep	M	0:01:08.628-0:01:08.894	BL	0.24337	8	0.911723
Trial 1	1.3	Rep	M	0:01:08.894-0:01:09.160	BL	0.278024	8	1.04155
Trial 1	1.3	Rep	M	0:01:09.160-0:01:09.426	BL	0.192182	8	0.719964
Trial 1	1.3	Rep	M	0:01:09.426-0:01:09.692	BL	0.335455	8	1.2567
Trial 1	1.3	Rep	M	0:01:09.692-0:01:09.958	BL	0.382485	8	1.43289
Trial 1	1.3	Rep	M	0:01:09.958-0:01:10.224	BL	0.593875	8	2.22481
Trial 1	1.3	Rep	M	0:01:10.224-0:01:10.490	BL	0.660982	8	2.4762
Trial 1	1.3	Rep	M	0:01:10.490-0:01:10.756	BL	0.39259	8	1.47074
Trial 1	1.3	Rep	M	0:01:10.756-0:01:11.022	BL	0.153019	8	0.573248
Trial 1	1.3	Rep	M	0:01:11.022-0:01:11.288	BL	0.248057	8	0.92928
Trial 1	1.3	Rep	M	0:01:11.288-0:01:11.554	BL	0.606256	8	2.2712
Trial 1	1.3	Rep	M	0:01:11.554-0:01:11.820	BL	0.418238	8	1.56682
Trial 1	1.3	Rep	M	0:01:11.820-0:01:12.086	BL	0.236979	8	0.887783
Trial 1	1.3	Rep	M	0:01:12.086-0:01:12.352	BL	0.110809	8	0.415119
Trial 1	1.3	Rep	M	0:01:12.352-0:01:12.618	BL	0.173885	8	0.651415
Trial 1	1.3	Rep	M	0:01:12.618-0:01:12.884	BL	0.252333	8	0.945304
Trial 1	1.3	Rep	M	0:01:12.884-0:01:13.150	BL	0.194266	8	0.727768
Trial 1	1.3	Rep	M	0:01:13.150-0:01:13.416	BL	0.133815	8	0.501302
Trial 1	1.3	Rep	M	0:01:13.416-0:01:13.682	BL	0.352755	8	1.32151
Trial 1	1.3	Rep	M	0:01:13.682-0:01:13.948	BL	1.16633	8	4.36935
Trial 1	1.3	Rep	M	0:01:13.948-0:01:14.214	BL	1.1115	8	4.16397
Trial 1	1.3	Rep	M	0:01:14.214-0:01:14.480	BL	1.33007	8	4.98277
Trial 1	1.3	Rep	M	0:01:14.480-0:01:14.746	BL	1.40801	8	5.27476
Trial 1	1.3	Rep	M	0:01:14.746-0:01:15.012	BL	0.353301	8	1.32356
Trial 1	1.3	Rep	M	0:01:15.012-0:01:15.278	BL	0.194345	8	0.728062
Trial 1	1.3	Rep	M	0:01:15.278-0:01:15.544	BL	0.228832	8	0.857267
Trial 1	1.3	Rep	M	0:01:15.544-0:01:15.810	BL	0.241466	8	0.904592
Trial 1	1.3	Rep	M	0:01:15.810-0:01:16.076	BL	0.769627	7	3.2951
Trial 1	1.3	Rep	M	0:01:16.076-0:01:16.342	BL	2.85715	8	10.7036
Trial 1	1.3	Rep	M	0:01:16.342-0:01:16.608	BL	2.98898	8	11.1974
Trial 1	1.3	Rep	M	0:01:16.608-0:01:16.874	BL	2.63756	8	9.88097
Trial 1	1.3	Rep	M	0:01:16.874-0:01:17.140	BL	1.6262	8	6.09218
Trial 1	1.3	Rep	M	0:01:17.140-0:01:17.406	BL	1.19147	8	4.46352
Trial 1	1.3	Rep	M	0:01:17.406-0:01:17.672	BL	1.89967	8	7.11664
Trial 1	1.3	Rep	M	0:01:17.672-0:01:17.938	BL	0.616641	8	2.31008
Trial 1	1.3	Rep	M	0:01:17.938-0:01:18.204	BL	0.57586	8	2.15731
Trial 1	1.3	Rep	M	0:01:18.204-0:01:18.470	BL	0.886192	8	3.3199
Trial 1	1.3	Rep	M	0:01:18.470-0:01:18.736	BL	0.351934	8	1.31843
Trial 1	1.3	Rep	M	0:01:18.736-0:01:19.002	BL	0.290254	8	1.08736
Trial 1	1.3	Rep	M	0:01:19.002-0:01:19.268	BL	0.106529	8	0.399082
Trial 1	1.3	Rep	M	0:01:19.268-0:01:19.534	BL	0.226718	8	0.84934
Trial 1	1.3	Rep	M	0:01:19.534-0:01:19.800	BL	0.566515	8	2.12231
Trial 1	1.3	Rep	M	0:01:19.800-0:01:20.066	BL	0.483382	8	1.81087
Trial 1	1.3	Rep	M	0:01:20.066-0:01:20.332	BL	0.426114	8	1.59634
Trial 1	1.3	Rep	M	0:01:20.332-0:01:20.598	BL	0.278415	8	1.04301
Trial 1	1.3	Rep	M	0:01:20.598-0:01:20.864	BL	0.14865	8	0.55688
Trial 1	1.3	Rep	M	0:01:20.864-0:01:21.130	BL	0.248812	8	0.932111
Trial 1	1.3	Rep	M	0:01:21.130-0:01:21.396	BL	0.216117	8	0.809625
Trial 1	1.3	Rep	M	0:01:21.396-0:01:21.662	BL	0.198593	8	0.743978
Trial 1	1.3	Rep	M	0:01:21.662-0:01:21.928	BL	0.197395	8	0.739492
Trial 1	1.3	Rep	M	0:01:21.928-0:01:22.194	BL	0.17163	8	0.642972
Trial 1	1.3	Rep	M	0:01:22.194-0:01:22.460	BL	0.120039	8	0.449694
Trial 1	1.3	Rep	M	0:01:22.460-0:01:22.726	BL	0.167433	8	0.627249
Trial 1	1.3	Rep	M	0:01:22.726-0:01:22.992	BL	0.239299	8	0.896474
Trial 1	1.3	Rep	M	0:01:22.992-0:01:23.258	BL	0.138291	8	0.518073
Trial 1	1.3	Rep	M	0:01:23.258-0:01:23.524	BL	0.179486	8	0.672397
Trial 1	1.3	Rep	M	0:01:23.524-0:01:23.790	BL	0.285318	8	1.06888
Trial 1	1.3	Rep	M	0:01:23.790-0:01:24.056	BL	0.151798	8	0.568674
Trial 1	1.3	Rep	M	0:01:24.056-0:01:24.322	BL	0.15528	8	0.581718
Trial 1	1.3	Rep	M	0:01:24.322-0:01:24.588	BL	0.133119	8	0.498697
Trial 1	1.3	Rep	M	0:01:24.588-0:01:24.854	BL	0.200903	8	0.752627
Trial 1	1.3	Rep	M	0:01:24.854-0:01:25.120	BL	0.152085	8	0.569748
Trial 1	1.3	Rep	M	0:01:25.120-0:01:25.386	BL	0.0930665	8	0.348648
Trial 1	1.3	Rep	M	0:01:25.386-0:01:25.652	BL	0.0829419	7	0.355108
Trial 1	1.3	Rep	M	0:01:25.652-0:01:25.918	BL	0.197737	8	0.740773
Trial 1	1.3	Rep	M	0:01:25.918-0:01:26.184	BL	0.169822	8	0.636194
Trial 1	1.3	Rep	M	0:01:26.184-0:01:26.450	BL	0.152301	8	0.570558
Trial 1	1.3	Rep	M	0:01:26.450-0:01:26.716	BL	0.153453	8	0.574877
Trial 1	1.3	Rep	M	0:01:26.716-0:01:26.982	BL	0.124882	8	0.467841
Trial 1	1.3	Rep	M	0:01:26.982-0:01:27.248	BL	0.128931	8	0.483009
Trial 1	1.3	Rep	M	0:01:27.248-0:01:27.514	BL	0.104145	8	0.39015
Trial 1	1.3	Rep	M	0:01:27.514-0:01:27.780	BL	0.0687709	8	0.257631
Trial 1	1.3	Rep	M	0:01:27.780-0:01:28.046	BL	0.116472	8	0.436336
Trial 1	1.3	Rep	M	0:01:28.046-0:01:28.312	BL	0.303693	8	1.13771
Trial 1	1.3	Rep	M	0:01:28.312-0:01:28.578	BL	0.195995	8	0.734247
Trial 1	1.3	Rep	M	0:01:28.578-0:01:28.844	BL	0.131973	8	0.494405
Trial 1	1.3	Rep	M	0:01:28.844-0:01:29.110	BL	0.262939	8	0.985032
Trial 1	1.3	Rep	M	0:01:29.110-0:01:29.376	BL	0.215352	8	0.806762
Trial 1	1.3	Rep	M	0:01:29.376-0:01:29.642	BL	0.11172	8	0.418531
Trial 1	1.3	Rep	M	0:01:29.642-0:01:29.908	BL	0.0658258	8	0.2466
Trial 1	1.3	Rep	M	0:01:29.908-0:01:30.174	BL	0.138023	8	0.51707
Trial 1	1.3	Rep	M	0:01:30.174-0:01:30.440	BL	0.0653191	8	0.244702
Trial 1	1.3	Rep	M	0:01:30.440-0:01:30.706	BL	0.0570828	8	0.213846
Trial 1	1.3	Rep	M	0:01:30.706-0:01:30.972	BL	0.0811917	8	0.304163
Trial 1	1.3	Rep	M	0:01:30.972-0:01:31.238	BL	0.128777	8	0.482431
Trial 1	1.3	Rep	M	0:01:31.238-0:01:31.504	BL	0.231371	8	0.866772
Trial 1	1.3	Rep	M	0:01:31.504-0:01:31.770	BL	0.0960323	8	0.35976
Trial 1	1.3	Rep	M	0:01:31.770-0:01:32.036	BL	0.158582	8	0.594091
Trial 1	1.3	Rep	M	0:01:32.036-0:01:32.302	BL	0.1026	8	0.384364
Trial 1	1.3	Rep	M	0:01:32.302-0:01:32.568	BL	0.0968329	8	0.36276
Trial 1	1.3	Rep	M	0:01:32.568-0:01:32.834	BL	0.100578	8	0.37679
Trial 1	1.3	Rep	M	0:01:32.834-0:01:33.100	BL	0.11218	8	0.420253
Trial 1	1.3	Rep	M	0:01:33.100-0:01:33.366	BL	0.174539	8	0.653868
Trial 1	1.3	Rep	M	0:01:33.366-0:01:33.632	BL	0.186468	8	0.698552
Trial 1	1.3	Rep	M	0:01:33.632-0:01:33.898	BL	0.261098	8	0.97814
Trial 1	1.3	Rep	M	0:01:33.898-0:01:34.164	BL	0.101002	8	0.378375
Trial 1	1.3	Rep	M	0:01:34.164-0:01:34.430	BL	0.233282	8	0.873928
Trial 1	1.3	Rep	M	0:01:34.430-0:01:34.696	BL	0.0721728	8	0.270379
Trial 1	1.3	Rep	M	0:01:34.696-0:01:34.962	BL	0.176716	8	0.662026
Trial 1	1.3	Rep	M	0:01:34.962-0:01:35.228	BL	0.185505	7	0.794224
Trial 1	1.3	Rep	M	0:01:35.228-0:01:35.494	BL	0.120813	8	0.452596
Trial 1	1.3	Rep	M	0:01:35.494-0:01:35.760	BL	0.23073	8	0.864371
Trial 1	1.3	Rep	M	0:01:35.760-0:01:36.026	BL	0.166106	8	0.622275
Trial 1	1.3	Rep	M	0:01:36.026-0:01:36.292	BL	0.30016	8	1.12447
Trial 1	1.3	Rep	M	0:01:36.292-0:01:36.558	BL	0.176854	8	0.662542
Trial 1	1.3	Rep	M	0:01:36.558-0:01:36.824	BL	0.179767	8	0.673454
Trial 1	1.3	Rep	M	0:01:36.824-0:01:37.090	BL	0.187093	8	0.700899
Trial 1	1.3	Rep	M	0:01:37.090-0:01:37.356	BL	0.100671	8	0.377138
Trial 1	1.3	Rep	M	0:01:37.356-0:01:37.622	BL	0.122382	8	0.458472
Trial 1	1.3	Rep	M	0:01:37.622-0:01:37.888	BL	0.145522	8	0.545159
Trial 1	1.3	Rep	M	0:01:37.888-0:01:38.154	BL	0.12812	8	0.479972
Trial 1	1.3	Rep	M	0:01:38.154-0:01:38.420	BL	0.040666	8	0.152345
Trial 1	1.3	Rep	M	0:01:38.420-0:01:38.686	BL	0.137005	8	0.513256
Trial 1	1.3	Rep	M	0:01:38.686-0:01:38.952	BL	0.0749245	8	0.280685
Trial 1	1.3	Rep	M	0:01:38.952-0:01:39.218	BL	0.135945	8	0.509286
Trial 1	1.3	Rep	M	0:01:39.218-0:01:39.484	BL	0.068484	8	0.256559
Trial 1	1.3	Rep	M	0:01:39.484-0:01:39.750	BL	0.159438	8	0.597292
Trial 1	1.3	Rep	M	0:01:39.750-0:01:40.016	BL	0.154471	8	0.578688
Trial 1	1.3	Rep	M	0:01:40.016-0:01:40.282	BL	0.153583	8	0.57536
Trial 1	1.3	Rep	M	0:01:40.282-0:01:40.548	BL	0.288743	8	1.08171
Trial 1	1.3	Rep	M	0:01:40.548-0:01:40.814	BL	0.153609	8	0.57546
Trial 1	1.3	Rep	M	0:01:40.814-0:01:41.080	BL	0.164521	8	0.616337
Trial 1	1.3	Rep	M	0:01:41.080-0:01:41.346	BL	0.156414	8	0.585969
Trial 1	1.3	Rep	M	0:01:41.346-0:01:41.612	BL	0.177772	8	0.66598
Trial 1	1.3	Rep	M	0:01:41.612-0:01:41.878	BL	0.0976291	8	0.365743
Trial 1	1.3	Rep	M	0:01:41.878-0:01:42.144	BL	0.197127	8	0.738488
Trial 1	1.3	Rep	M	0:01:42.144-0:01:42.410	BL	0.120706	8	0.452193
Trial 1	1.3	Rep	M	0:01:42.410-0:01:42.676	BL	0.119905	8	0.449194
Trial 1	1.3	Rep	M	0:01:42.676-0:01:42.942	BL	0.2001	8	0.749623
Trial 1	1.3	Rep	M	0:01:42.942-0:01:43.208	BL	0.177137	8	0.6636
Trial 1	1.3	Rep	M	0:01:43.208-0:01:43.474	BL	0.252674	8	0.946577
Trial 1	1.3	Rep	M	0:01:43.474-0:01:43.740	BL	0.236038	8	0.884255
Trial 1	1.3	Rep	M	0:01:43.740-0:01:44.006	BL	0.151607	8	0.567962
Trial 1	1.3	Rep	M	0:01:44.006-0:01:44.272	BL	0.139926	8	0.524197
Trial 1	1.3	Rep	M	0:01:44.272-0:01:44.538	BL	0.0675207	8	0.252948
Trial 1	1.3	Rep	M	0:01:44.538-0:01:44.804	BL	0.125333	7	0.536605
Trial 1	1.3	Rep	M	0:01:44.804-0:01:45.070	BL	0.0701795	8	0.262912
Trial 1	1.3	Rep	M	0:01:45.070-0:01:45.336	BL	0.233795	8	0.875848
Trial 1	1.3	Rep	M	0:01:45.336-0:01:45.602	BL	0.199553	8	0.747579
Trial 1	1.3	Rep	M	0:01:45.602-0:01:45.868	BL	0.205263	8	0.768965
Trial 1	1.3	Rep	M	0:01:45.868-0:01:46.134	BL	0.125785	8	0.471221
Trial 1	1.3	Rep	M	0:01:46.134-0:01:46.400	BL	0.186708	8	0.699454
Trial 1	1.3	Rep	M	0:01:46.400-0:01:46.666	BL	0.125128	8	0.468757
Trial 1	1.3	Rep	M	0:01:46.666-0:01:46.932	BL	0.1851	8	0.693433
Trial 1	1.3	Rep	M	0:01:46.932-0:01:47.198	BL	0.121634	8	0.455672
Trial 1	1.3	Rep	M	0:01:47.198-0:01:47.464	BL	0.0911713	8	0.34155
Trial 1	1.3	Rep	M	0:01:47.464-0:01:47.730	BL	0.136212	8	0.510282
Trial 1	1.3	Rep	M	0:01:47.730-0:01:47.996	BL	0.10001	8	0.374664
Trial 1	1.3	Rep	M	0:01:47.996-0:01:48.262	BL	0.211769	8	0.793342
Trial 1	1.3	Rep	M	0:01:48.262-0:01:48.528	BL	0.147004	8	0.550716
Trial 1	1.3	Rep	M	0:01:48.528-0:01:48.794	BL	0.188979	8	0.707962
Trial 1	1.3	Rep	M	0:01:48.794-0:01:49.060	BL	0.186682	8	0.699358
Trial 1	1.3	Rep	M	0:01:49.060-0:01:49.326	BL	0.141212	8	0.52902
Trial 1	1.3	Rep	M	0:01:49.326-0:01:49.592	BL	0.106003	8	0.397115
Trial 1	1.3	Rep	M	0:01:49.592-0:01:49.858	BL	0.0488625	8	0.183051
Trial 1	1.3	Rep	M	0:01:49.858-0:01:50.124	BL	0.150669	8	0.564444
Trial 1	1.3	Rep	M	0:01:50.124-0:01:50.390	BL	0.0933422	8	0.349686
Trial 1	1.3	Rep	M	0:01:50.390-0:01:50.656	BL	0.0890416	8	0.333571
Trial 1	1.3	Rep	M	0:01:50.656-0:01:50.922	BL	0.108805	8	0.407611
Trial 1	1.3	Rep	M	0:01:50.922-0:01:51.188	BL	0.142413	8	0.533512
Trial 1	1.3	Rep	M	0:01:51.188-0:01:51.454	BL	0.0965154	8	0.361571
Trial 1	1.3	Rep	M	0:01:51.454-0:01:51.720	BL	0.107805	8	0.403864
Trial 1	1.3	Rep	M	0:01:51.720-0:01:51.986	BL	0.114201	8	0.427826
Trial 1	1.3	Rep	M	0:01:51.986-0:01:52.252	BL	0.127166	8	0.476399
Trial 1	1.3	Rep	M	0:01:52.252-0:01:52.518	BL	0.130993	8	0.490733
Trial 1	1.3	Rep	M	0:01:52.518-0:01:52.784	BL	0.116324	8	0.435782
Trial 1	1.3	Rep	M	0:01:52.784-0:01:53.050	BL	0.164218	8	0.615206
Trial 1	1.3	Rep	M	0:01:53.050-0:01:53.316	BL	0.121534	8	0.455295
Trial 1	1.3	Rep	M	0:01:53.316-0:01:53.582	BL	0.159649	8	0.598085
Trial 1	1.3	Rep	M	0:01:53.582-0:01:53.848	BL	0.078884	8	0.295519
Trial 1	1.3	Rep	M	0:01:53.848-0:01:54.114	BL	0.107649	7	0.460888
Trial 1	1.3	Rep	M	0:01:54.114-0:01:54.380	BL	0.112522	8	0.421534
Trial 1	1.3	Rep	M	0:01:54.380-0:01:54.646	BL	0.0795115	8	0.29787
Trial 1	1.3	Rep	M	0:01:54.646-0:01:54.912	BL	0.234962	8	0.880223
Trial 1	1.3	Rep	M	0:01:54.912-0:01:55.178	BL	0.128832	8	0.482638
Trial 1	1.3	Rep	M	0:01:55.178-0:01:55.444	BL	0.245683	8	0.920385
Trial 1	1.3	Rep	M	0:01:55.444-0:01:55.710	BL	0.306281	8	1.14741
Trial 1	1.3	Rep	M	0:01:55.710-0:01:55.976	BL	0.221547	8	0.829971
Trial 1	1.3	Rep	M	0:01:55.976-0:01:56.242	BL	0.163663	8	0.61312
Trial 1	1.3	Rep	M	0:01:56.242-0:01:56.508	BL	0.0946234	8	0.354482
Trial 1	1.3	Rep	M	0:01:56.508-0:01:56.774	BL	0.14825	8	0.555385
Trial 1	1.3	Rep	M	0:01:56.774-0:01:57.040	BL	0.0510291	8	0.191169
Trial 1	1.3	Rep	M	0:01:57.040-0:01:57.306	BL	0.192654	8	0.721727
Trial 1	1.3	Rep	M	0:01:57.306-0:01:57.572	BL	0.0862514	8	0.32312
Trial 1	1.3	Rep	M	0:01:57.572-0:01:57.838	BL	0.124967	8	0.468159
Trial 1	1.3	Rep	M	0:01:57.838-0:01:58.104	BL	0.184923	8	0.692766
Trial 1	1.3	Rep	M	0:01:58.104-0:01:58.370	BL	0.140377	8	0.525889
Trial 1	1.3	Rep	M	0:01:58.370-0:01:58.636	BL	0.11892	8	0.445503
Trial 1	1.3	Rep	M	0:01:58.636-0:01:58.902	BL	0.144697	8	0.54207
Trial 1	1.3	Rep	M	0:01:58.902-0:01:59.168	BL	0.121151	8	0.453867
Trial 1	1.3	Rep	M	0:01:59.168-0:01:59.434	BL	0.0653617	8	0.24486
Trial 1	1.3	Rep	M	0:01:59.434-0:01:59.700	BL	0.111981	8	0.419505
Trial 1	1.3	Rep	M	0:01:59.700-0:01:59.966	BL	0.136007	8	0.509515
Trial 1	1.3	Rep	M	0:01:59.966-0:02:00.232	BL	0.139381	8	0.522154
Trial 1	1.3	Rep	M	0:02:00.232-0:02:00.498	BL	0.119078	8	0.446095
Trial 1	1.3	Rep	M	0:02:00.498-0:02:00.764	BL	0.204495	8	0.766088
Trial 1	1.3	Rep	M	0:02:00.764-0:02:01.030	BL	0.269621	8	1.01007
Trial 1	1.3	Rep	M	0:02:01.030-0:02:01.296	BL	0.350243	8	1.31209
Trial 1	1.3	Rep	M	0:02:01.296-0:02:01.562	BL	0.418288	8	1.56702
Trial 1	1.3	Rep	M	0:02:01.562-0:02:01.828	BL	0.286685	8	1.074
Trial 1	1.3	Rep	M	0:02:01.828-0:02:02.094	BL	0.201718	8	0.755683
Trial 1	1.3	Rep	M	0:02:02.094-0:02:02.360	BL	0.286164	8	1.07204
Trial 1	1.3	Rep	M	0:02:02.360-0:02:02.626	BL	0.246843	8	0.924734
Trial 1	1.3	Rep	M	0:02:02.626-0:02:02.892	BL	0.121176	8	0.453957
Trial 1	1.3	Rep	M	0:02:02.892-0:02:03.158	BL	0.13241	8	0.496041
Trial 1	1.3	Rep	M	0:02:03.158-0:02:03.424	BL	0.223507	8	0.837317
Trial 1	1.3	Rep	M	0:02:03.424-0:02:03.690	BL	0.339361	7	1.45295
Trial 1	1.3	Rep	M	0:02:03.690-0:02:03.956	BL	0.260625	8	0.976369
Trial 1	1.3	Rep	M	0:02:03.956-0:02:04.222	BL	0.306681	8	1.1489
Trial 1	1.3	Rep	M	0:02:04.222-0:02:04.488	BL	0.23299	8	0.872838
Trial 1	1.3	Rep	M	0:02:04.488-0:02:04.754	BL	0.361356	8	1.35372
Trial 1	1.3	Rep	M	0:02:04.754-0:02:05.020	BL	0.265064	8	0.992989
Trial 1	1.3	Rep	M	0:02:05.020-0:02:05.286	BL	0.262251	8	0.982466
Trial 1	1.3	Rep	M	0:02:05.286-0:02:05.552	BL	0.297616	8	1.11494
Trial 1	1.3	Rep	M	0:02:05.552-0:02:05.818	BL	0.313224	8	1.17341
Trial 1	1.3	Rep	M	0:02:05.818-0:02:06.084	BL	0.23242	8	0.870702
Trial 1	1.3	Rep	M	0:02:06.084-0:02:06.350	BL	0.410358	8	1.5373
Trial 1	1.3	Rep	M	0:02:06.350-0:02:06.616	BL	0.201248	8	0.753931
Trial 1	1.3	Rep	M	0:02:06.616-0:02:06.882	BL	0.264749	8	0.991819
Trial 1	1.3	Rep	M	0:02:06.882-0:02:07.148	BL	0.225723	8	0.845612
Trial 1	1.3	Rep	M	0:02:07.148-0:02:07.414	BL	0.288144	8	1.07946
Trial 1	1.3	Rep	M	0:02:07.414-0:02:07.680	BL	0.330067	8	1.23651
Trial 1	1.3	Rep	M	0:02:07.680-0:02:07.946	BL	0.285474	8	1.06946
Trial 1	1.3	Rep	M	0:02:07.946-0:02:08.212	BL	0.273001	8	1.02273
Trial 1	1.3	Rep	M	0:02:08.212-0:02:08.478	BL	0.323795	8	1.21301
Trial 1	1.3	Rep	M	0:02:08.478-0:02:08.744	BL	0.458458	8	1.71751
Trial 1	1.3	Rep	M	0:02:08.744-0:02:09.010	BL	0.220707	8	0.826823
Trial 1	1.3	Rep	M	0:02:09.010-0:02:09.276	BL	0.782438	8	2.93122
Trial 1	1.3	Rep	M	0:02:09.276-0:02:09.542	BL	1.23765	8	4.63653
Trial 1	1.3	Rep	M	0:02:09.542-0:02:09.808	BL	0.613944	8	2.29997
Trial 1	1.3	Rep	M	0:02:09.808-0:02:10.074	BL	3.97503	8	14.8915
Trial 1	1.3	Rep	M	0:02:10.074-0:02:10.340	BL	4.44817	8	16.6639
Trial 1	1.3	Rep	M	0:02:10.340-0:02:10.606	BL	2.82489	8	10.5828
Trial 1	1.3	Rep	M	0:02:10.606-0:02:10.872	BL	0.960273	8	3.59742
Trial 1	1.3	Rep	M	0:02:10.872-0:02:11.138	BL	2.31392	8	8.66848
Trial 1	1.3	Rep	M	0:02:11.138-0:02:11.404	BL	3.02328	8	11.326
Trial 1	1.3	Rep	M	0:02:11.404-0:02:11.670	BL	1.82534	8	6.83816
Trial 1	1.3	Rep	M	0:02:11.670-0:02:11.936	BL	0.66305	8	2.48396
Trial 1	1.3	Rep	M	0:02:11.936-0:02:12.202	BL	0.586712	8	2.19797
Trial 1	1.3	Rep	M	0:02:12.202-0:02:12.468	BL	1.63608	8	6.12911
Trial 1	1.3	Rep	M	0:02:12.468-0:02:12.734	BL	0.822548	8	3.08148
Trial 1	1.3	Rep	M	0:02:12.734-0:02:13.000	BL	1.92465	8	7.21021
Trial 1	1.3	Rep	M	0:02:13.000-0:02:13.266	BL	1.55355	7	6.65143
Trial 1	1.3	Rep	M	0:02:13.266-0:02:13.532	BL	0.250181	8	0.937242
Trial 1	1.3	Rep	M	0:02:13.532-0:02:13.798	BL	0.232865	8	0.872374
Trial 1	1.3	Rep	M	0:02:13.798-0:02:14.064	BL	0.264904	8	0.992401
Trial 1	1.3	Rep	M	0:02:14.064-0:02:14.330	BL	0.223215	8	0.836218
Trial 1	1.3	Rep	M	0:02:14.330-0:02:14.596	BL	0.168376	8	0.63078
Trial 1	1.3	Rep	M	0:02:14.596-0:02:14.862	BL	0.210483	8	0.788524
Trial 1	1.3	Rep	M	0:02:14.862-0:02:15.128	BL	0.241272	8	0.903864
Trial 1	1.3	Rep	M	0:02:15.128-0:02:15.394	BL	0.273919	8	1.02617
Trial 1	1.3	Rep	M	0:02:15.394-0:02:15.660	BL	0.299883	8	1.12344
Trial 1	1.3	Rep	M	0:02:15.660-0:02:15.926	BL	0.395084	8	1.48008
Trial 1	1.3	Rep	M	0:02:15.926-0:02:16.192	BL	0.452128	8	1.69379
Trial 1	1.3	Rep	M	0:02:16.192-0:02:16.458	BL	0.759481	8	2.8452
Trial 1	1.3	Rep	M	0:02:16.458-0:02:16.724	BL	0.388471	8	1.45532
Trial 1	1.3	Rep	M	0:02:16.724-0:02:16.990	BL	0.27372	8	1.02542
Trial 1	1.3	Rep	M	0:02:16.990-0:02:17.256	BL	0.472969	8	1.77185
Trial 1	1.3	Rep	M	0:02:17.256-0:02:17.522	BL	0.705664	8	2.64359
Trial 1	1.3	Rep	M	0:02:17.522-0:02:17.788	BL	0.324809	8	1.21681
Trial 1	1.3	Rep	M	0:02:17.788-0:02:18.054	BL	0.115551	8	0.43288
Trial 1	1.3	Rep	M	0:02:18.054-0:02:18.320	BL	0.315669	8	1.18257
Trial 1	1.3	Rep	M	0:02:18.320-0:02:18.586	BL	0.390129	8	1.46152
Trial 1	1.3	Rep	M	0:02:18.586-0:02:18.852	BL	1.4621	8	5.47743
Trial 1	1.3	Rep	M	0:02:18.852-0:02:19.118	BL	1.61955	8	6.06721
Trial 1	1.3	Rep	M	0:02:19.118-0:02:19.384	BL	0.702911	8	2.63328
Trial 1	1.3	Rep	M	0:02:19.384-0:02:19.650	BL	0.831669	8	3.11566
Trial 1	1.3	Rep	M	0:02:19.650-0:02:19.916	BL	0.384371	8	1.43995
Trial 1	1.3	Rep	M	0:02:19.916-0:02:20.182	BL	0.30203	8	1.13148
Trial 1	1.3	Rep	M	0:02:20.182-0:02:20.448	BL	0.226877	8	0.84994
Trial 1	1.3	Rep	M	0:02:20.448-0:02:20.714	BL	0.282502	8	1.05833
Trial 1	1.3	Rep	M	0:02:20.714-0:02:20.980	BL	1.85905	8	6.96446
Trial 1	1.3	Rep	M	0:02:20.980-0:02:21.246	BL	2.77915	8	10.4114
Trial 1	1.3	Rep	M	0:02:21.246-0:02:21.512	BL	2.30098	8	8.62008
Trial 1	1.3	Rep	M	0:02:21.512-0:02:21.778	BL	2.54316	8	9.52732
Trial 1	1.3	Rep	M	0:02:21.778-0:02:22.044	BL	2.46223	8	9.22414
Trial 1	1.3	Rep	M	0:02:22.044-0:02:22.310	BL	1.71551	8	6.42669
Trial 1	1.3	Rep	M	0:02:22.310-0:02:22.576	BL	0.322791	8	1.20925
Trial 1	1.3	Rep	M	0:02:22.576-0:02:22.842	BL	0.249492	7	1.06818
Trial 1	1.3	Rep	M	0:02:22.842-0:02:23.108	BL	0.284703	8	1.06657
Trial 1	1.3	Rep	M	0:02:23.108-0:02:23.374	BL	0.449887	8	1.68538
Trial 1	1.3	Rep	M	0:02:23.374-0:02:23.640	BL	0.168656	8	0.631827
Trial 1	1.3	Rep	M	0:02:23.640-0:02:23.906	BL	0.427283	8	1.60071
Trial 1	1.3	Rep	M	0:02:23.906-0:02:24.172	BL	0.435105	8	1.63001
Trial 1	1.3	Rep	M	0:02:24.172-0:02:24.438	BL	0.384171	8	1.4392
Trial 1	1.3	Rep	M	0:02:24.438-0:02:24.704	BL	0.376112	8	1.40901
Trial 1	1.3	Rep	M	0:02:24.704-0:02:24.970	BL	0.1733	8	0.649229
Trial 1	1.3	Rep	M	0:02:24.970-0:02:25.236	BL	0.13976	8	0.523576
Trial 1	1.3	Rep	M	0:02:25.236-0:02:25.502	BL	0.440657	8	1.65081
Trial 1	1.3	Rep	M	0:02:25.502-0:02:25.768	BL	0.484698	8	1.8158
Trial 1	1.3	Rep	M	0:02:25.768-0:02:26.034	BL	1.72918	8	6.47794
Trial 1	1.3	Rep	M	0:02:26.034-0:02:26.300	BL	2.65571	8	9.94898
Trial 1	1.3	Rep	M	0:02:26.300-0:02:26.566	BL	3.8424	8	14.3946
Trial 1	1.3	Rep	M	0:02:26.566-0:02:26.832	BL	3.97273	8	14.8828
Trial 1	1.3	Rep	M	0:02:26.832-0:02:27.098	BL	2.19104	8	8.20822
Trial 1	1.3	Rep	M	0:02:27.098-0:02:27.364	BL	0.322709	8	1.20895
Trial 1	1.3	Rep	M	0:02:27.364-0:02:27.630	BL	0.363275	8	1.36092
Trial 1	1.3	Rep	M	0:02:27.630-0:02:27.896	BL	0.564632	8	2.11524
Trial 1	1.3	Rep	M	0:02:27.896-0:02:28.162	BL	0.316197	8	1.18456
Trial 1	1.3	Rep	M	0:02:28.162-0:02:28.428	BL	0.614052	8	2.30039
Trial 1	1.3	Rep	M	0:02:28.428-0:02:28.694	BL	0.972095	8	3.64171
Trial 1	1.3	Rep	M	0:02:28.694-0:02:28.960	BL	0.200308	8	0.750407
Trial 1	1.3	Rep	M	0:02:28.960-0:02:29.226	BL	0.211573	8	0.792602
Trial 1	1.3	Rep	M	0:02:29.226-0:02:29.492	BL	0.130126	8	0.487486
Trial 1	1.3	Rep	M	0:02:29.492-0:02:29.758	BL	0.230416	8	0.863197
Trial 1	1.3	Rep	M	0:02:29.758-0:02:30.024	BL	0.228183	8	0.854829
Trial 1	1.3	Rep	M	0:02:30.024-0:02:30.290	BL	0.174016	8	0.651906
Trial 1	1.3	Rep	M	0:02:30.290-0:02:30.556	BL	0.228634	8	0.85652
Trial 1	1.3	Rep	M	0:02:30.556-0:02:30.822	BL	0.267254	8	1.0012
Trial 1	1.3	Rep	M	0:02:30.822-0:02:31.088	BL	0.0954974	8	0.357758
Trial 1	1.3	Rep	M	0:02:31.088-0:02:31.354	BL	0.11502	8	0.430892
Trial 1	1.3	Rep	M	0:02:31.354-0:02:31.620	BL	0.183683	8	0.688124
Trial 1	1.3	Rep	M	0:02:31.620-0:02:31.886	BL	0.170676	8	0.639392
Trial 1	1.3	Rep	M	0:02:31.886-0:02:32.152	BL	0.201219	7	0.861509
Trial 1	1.3	Rep	M	0:02:32.152-0:02:32.418	BL	0.167624	8	0.627966
Trial 1	1.3	Rep	M	0:02:32.418-0:02:32.684	BL	0.26002	8	0.974096
Trial 1	1.3	Rep	M	0:02:32.684-0:02:32.950	BL	0.13702	8	0.513308
Trial 1	1.3	Rep	M	0:02:32.950-0:02:33.216	BL	0.246526	8	0.923545
Trial 1	1.3	Rep	M	0:02:33.216-0:02:33.482	BL	0.341982	8	1.28114
Trial 1	1.3	Rep	M	0:02:33.482-0:02:33.748	BL	0.202903	8	0.760127
Trial 1	1.3	Rep	M	0:02:33.748-0:02:34.014	BL	0.320934	8	1.20229
Trial 1	1.3	Rep	M	0:02:34.014-0:02:34.280	BL	0.19533	8	0.731751
Trial 1	1.3	Rep	M	0:02:34.280-0:02:34.546	BL	0.25951	8	0.972189
Trial 1	1.3	Rep	M	0:02:34.546-0:02:34.812	BL	0.198344	8	0.743044
Trial 1	1.3	Rep	M	0:02:34.812-0:02:35.078	BL	0.149619	8	0.560513
Trial 1	1.3	Rep	M	0:02:35.078-0:02:35.344	BL	0.208268	8	0.780222
Trial 1	1.3	Rep	M	0:02:35.344-0:02:35.610	BL	0.161414	8	0.604694
Trial 1	1.3	Rep	M	0:02:35.610-0:02:35.876	BL	0.216934	8	0.812689
Trial 1	1.3	Rep	M	0:02:35.876-0:02:36.142	BL	0.201028	8	0.753101
Trial 1	1.3	Rep	M	0:02:36.142-0:02:36.408	BL	0.294666	8	1.1039
Trial 1	1.3	Rep	M	0:02:36.408-0:02:36.674	BL	0.277153	8	1.03828
Trial 1	1.3	Rep	M	0:02:36.674-0:02:36.940	BL	0.209405	8	0.784477
Trial 1	1.3	Rep	M	0:02:36.940-0:02:37.206	BL	0.133602	8	0.500505
Trial 1	1.3	Rep	M	0:02:37.206-0:02:37.472	BL	0.16241	8	0.608426
Trial 1	1.3	Rep	M	0:02:37.472-0:02:37.738	BL	0.0833516	8	0.312259
Trial 1	1.3	Rep	M	0:02:37.738-0:02:38.004	BL	0.097114	8	0.363814
Trial 1	1.3	Rep	M	0:02:38.004-0:02:38.270	BL	0.0958517	8	0.359084
Trial 1	1.3	Rep	M	0:02:38.270-0:02:38.536	BL	0.0454257	8	0.170178
Trial 1	1.3	Rep	M	0:02:38.536-0:02:38.802	BL	0.0656061	8	0.245776
Trial 1	1.3	Rep	M	0:02:38.802-0:02:39.068	BL	0.0580923	8	0.217629
Trial 1	1.3	Rep	M	0:02:39.068-0:02:39.334	BL	0.122972	8	0.460684
Trial 1	1.3	Rep	M	0:02:39.334-0:02:39.600	BL	0.092616	8	0.346963
Trial 1	1.3	Rep	M	0:02:39.600-0:02:39.866	BL	0.0948738	8	0.355421
Trial 1	1.3	Rep	M	0:02:39.866-0:02:40.132	BL	0.0542791	8	0.203343
Trial 1	1.3	Rep	M	0:02:40.132-0:02:40.398	BL	0.0880902	8	0.330009
Trial 1	1.3	Rep	M	0:02:40.398-0:02:40.664	BL	0.176503	8	0.661224
Trial 1	1.3	Rep	M	0:02:40.664-0:02:40.930	BL	0.337244	8	1.2634
Trial 1	1.3	Rep	M	0:02:40.930-0:02:41.196	BL	0.356376	8	1.33508
Trial 1	1.3	Rep	M	0:02:41.196-0:02:41.462	BL	0.329583	8	1.23471
Trial 1	1.3	Rep	M	0:02:41.462-0:02:41.728	BL	0.172681	7	0.739323
Trial 1	1.3	Rep	M	0:02:41.728-0:02:41.994	BL	0.060131	8	0.225266
Trial 1	1.3	Rep	M	0:02:41.994-0:02:42.260	BL	0.0953176	8	0.357084
Trial 1	1.3	Rep	M	0:02:42.260-0:02:42.526	BL	0.119424	8	0.447389
Trial 1	1.3	Rep	M	0:02:42.526-0:02:42.792	BL	0.171307	8	0.641753
Trial 1	1.3	Rep	M	0:02:42.792-0:02:43.058	BL	0.207737	8	0.778234
Trial 1	1.3	Rep	M	0:02:43.058-0:02:43.324	BL	0.282995	8	1.06017
Trial 1	1.3	Rep	M	0:02:43.324-0:02:43.590	BL	0.148906	8	0.557837
Trial 1	1.3	Rep	M	0:02:43.590-0:02:43.856	BL	0.142121	8	0.53242
Trial 1	1.3	Rep	M	0:02:43.856-0:02:44.122	BL	0.136743	8	0.512276
Trial 1	1.3	Rep	M	0:02:44.122-0:02:44.388	BL	0.205459	8	0.769695
Trial 1	1.3	Rep	M	0:02:44.388-0:02:44.654	BL	0.128773	8	0.482418
Trial 1	1.3	Rep	M	0:02:44.654-0:02:44.920	BL	0.0457502	8	0.171392
Trial 1	1.3	Rep	M	0:02:44.920-0:02:45.186	BL	0.0883638	8	0.331032
Trial 1	1.3	Rep	M	0:02:45.186-0:02:45.452	BL	0.193621	8	0.725354
Trial 1	1.3	Rep	M	0:02:45.452-0:02:45.718	BL	0.0651039	8	0.243896
Trial 1	1.3	Rep	M	0:02:45.718-0:02:45.984	BL	0.130694	8	0.489613
Trial 1	1.3	Rep	M	0:02:45.984-0:02:46.250	BL	0.107587	8	0.403047
Trial 1	1.3	Rep	M	0:02:46.250-0:02:46.516	BL	0.122247	8	0.457967
Trial 1	1.3	Rep	M	0:02:46.516-0:02:46.782	BL	0.0719197	8	0.269429
Trial 1	1.3	Rep	M	0:02:46.782-0:02:47.048	BL	0.0990149	8	0.370936
Trial 1	1.3	Rep	M	0:02:47.048-0:02:47.314	BL	0.15988	8	0.598947
Trial 1	1.3	Rep	M	0:02:47.314-0:02:47.580	BL	0.154736	8	0.579675
Trial 1	1.3	Rep	M	0:02:47.580-0:02:47.846	BL	0.298941	8	1.1199
Trial 1	1.3	Rep	M	0:02:47.846-0:02:48.112	BL	0.265153	8	0.993327
Trial 1	1.3	Rep	M	0:02:48.112-0:02:48.378	BL	0.140343	8	0.525758
Trial 1	1.3	Rep	M	0:02:48.378-0:02:48.644	BL	0.0448663	8	0.16808
Trial 1	1.3	Rep	M	0:02:48.644-0:02:48.910	BL	0.0865516	8	0.324242
Trial 1	1.3	Rep	M	0:02:48.910-0:02:49.176	BL	0.125125	8	0.468747
Trial 1	1.3	Rep	M	0:02:49.176-0:02:49.442	BL	0.17598	8	0.659268
Trial 1	1.3	Rep	M	0:02:49.442-0:02:49.708	BL	0.286143	8	1.07196
Trial 1	1.3	Rep	M	0:02:49.708-0:02:49.974	BL	0.381564	8	1.42945
Trial 1	1.3	Rep	M	0:02:49.974-0:02:50.240	BL	0.266725	8	0.999215
Trial 1	1.3	Rep	M	0:02:50.240-0:02:50.506	BL	0.109894	8	0.411688
Trial 1	1.3	Rep	M	0:02:50.506-0:02:50.772	BL	0.158485	8	0.593724
Trial 1	1.3	Rep	M	0:02:50.772-0:02:51.038	BL	0.179657	8	0.673039
Trial 1	1.3	Rep	M	0:02:51.038-0:02:51.304	BL	0.149339	7	0.639382
Trial 1	1.3	Rep	M	0:02:51.304-0:02:51.570	BL	0.130642	8	0.489416
Trial 1	1.3	Rep	M	0:02:51.570-0:02:51.836	BL	0.100923	8	0.378081
Trial 1	1.3	Rep	M	0:02:51.836-0:02:52.102	BL	0.0894543	8	0.335118
Trial 1	1.3	Rep	M	0:02:52.102-0:02:52.368	BL	0.148209	8	0.555227
Trial 1	1.3	Rep	M	0:02:52.368-0:02:52.634	BL	0.113334	8	0.424576
Trial 1	1.3	Rep	M	0:02:52.634-0:02:52.900	BL	0.0949026	8	0.35553
Trial 1	1.3	Rep	M	0:02:52.900-0:02:53.166	BL	0.14923	8	0.559053
Trial 1	1.3	Rep	M	0:02:53.166-0:02:53.432	BL	0.0467267	8	0.17505
Trial 1	1.3	Rep	M	0:02:53.432-0:02:53.698	BL	0.285644	8	1.07009
Trial 1	1.3	Rep	M	0:02:53.698-0:02:53.964	BL	0.193251	8	0.723961
Trial 1	1.3	Rep	M	0:02:53.964-0:02:54.230	BL	0.111175	8	0.416494
Trial 1	1.3	Rep	M	0:02:54.230-0:02:54.496	BL	0.0958079	8	0.358919
Trial 1	1.3	Rep	M	0:02:54.496-0:02:54.762	BL	0.0874025	8	0.327432
Trial 1	1.3	Rep	M	0:02:54.762-0:02:55.028	BL	0.140855	8	0.527677
Trial 1	1.3	Rep	M	0:02:55.028-0:02:55.294	BL	0.0835761	8	0.313096
Trial 1	1.3	Rep	M	0:02:55.294-0:02:55.560	BL	0.111551	8	0.4179
Trial 1	1.3	Rep	M	0:02:55.560-0:02:55.826	BL	0.0742039	8	0.277986
Trial 1	1.3	Rep	M	0:02:55.826-0:02:56.092	BL	0.108296	8	0.405704
Trial 1	1.3	Rep	M	0:02:56.092-0:02:56.358	BL	0.0700636	8	0.262475
Trial 1	1.3	Rep	M	0:02:56.358-0:02:56.624	BL	0.106581	8	0.399279
Trial 1	1.3	Rep	M	0:02:56.624-0:02:56.890	BL	0.0987027	8	0.369768
Trial 1	1.3	Rep	M	0:02:56.890-0:02:57.156	BL	0.0757091	8	0.283626
Trial 1	1.3	Rep	M	0:02:57.156-0:02:57.422	BL	0.0654869	8	0.245331
Trial 1	1.3	Rep	M	0:02:57.422-0:02:57.688	BL	0.0740489	8	0.277404
Trial 1	1.3	Rep	M	0:02:57.688-0:02:57.954	BL	0.16591	8	0.621535
Trial 1	1.3	Rep	M	0:02:57.954-0:02:58.220	BL	0.0422384	8	0.158236
Trial 1	1.3	Rep	M	0:02:58.220-0:02:58.486	BL	0.0610853	8	0.22884
Trial 1	1.3	Rep	M	0:02:58.486-0:02:58.752	BL	0.0610946	8	0.228877
Trial 1	1.3	Rep	M	0:02:58.752-0:02:59.018	BL	0.111722	8	0.418538
Trial 1	1.3	Rep	M	0:02:59.018-0:02:59.284	BL	0.134751	8	0.50481
Trial 1	1.3	Rep	M	0:02:59.284-0:02:59.550	BL	0.0487513	8	0.182635
Trial 1	1.3	Rep	M	0:02:59.550-0:02:59.816	BL	0.097239	8	0.364283
Trial 1	1.3	Rep	M	0:02:59.816-0:03:00.082	BL	0.118424	8	0.443648
Trial 1	1.3	Rep	M	0:03:00.082-0:03:00.348	CS1a	0.278847	8	1.04463
Trial 1	1.3	Rep	M	0:03:00.348-0:03:00.614	CS1a	0.112898	8	0.422942
Trial 1	1.3	Rep	M	0:03:00.614-0:03:00.880	CS1a	0.252545	7	1.08125
Trial 1	1.3	Rep	M	0:03:00.880-0:03:01.146	CS1a	0.04013	8	0.150337
Trial 1	1.3	Rep	M	0:03:01.146-0:03:01.412	CS1a	0.0609172	8	0.228211
Trial 1	1.3	Rep	M	0:03:01.412-0:03:01.678	CS1a	0.126336	8	0.47329
Trial 1	1.3	Rep	M	0:03:01.678-0:03:01.944	CS1a	0.0332205	8	0.124453
Trial 1	1.3	Rep	M	0:03:01.944-0:03:02.210	CS1a	0.335415	8	1.25655
Trial 1	1.3	Rep	M	0:03:02.210-0:03:02.476	CS1a	0.179997	8	0.674316
Trial 1	1.3	Rep	M	0:03:02.476-0:03:02.742	CS1a	0.121523	8	0.455252
Trial 1	1.3	Rep	M	0:03:02.742-0:03:03.008	CS1a	0.0377498	8	0.14142
Trial 1	1.3	Rep	M	0:03:03.008-0:03:03.274	CS1a	0.155863	8	0.583902
Trial 1	1.3	Rep	M	0:03:03.274-0:03:03.540	CS1a	0.0428111	8	0.16038
Trial 1	1.3	Rep	M	0:03:03.540-0:03:03.806	CS1a	0.0630932	8	0.236362
Trial 1	1.3	Rep	M	0:03:03.806-0:03:04.072	CS1a	0.0947759	8	0.355053
Trial 1	1.3	Rep	M	0:03:04.072-0:03:04.338	CS1a	0.0695442	8	0.260532
Trial 1	1.3	Rep	M	0:03:04.338-0:03:04.604	CS1a	0.0859386	8	0.321946
Trial 1	1.3	Rep	M	0:03:04.604-0:03:04.870	CS1a	0.0439409	8	0.164612
Trial 1	1.3	Rep	M	0:03:04.870-0:03:05.136	CS1a	0.188076	8	0.704583
Trial 1	1.3	Rep	M	0:03:05.136-0:03:05.402	CS1a	0.0718738	8	0.269259
Trial 1	1.3	Rep	M	0:03:05.402-0:03:05.668	CS1a	0.201182	8	0.753681
Trial 1	1.3	Rep	M	0:03:05.668-0:03:05.934	CS1a	0.0665744	8	0.249403
Trial 1	1.3	Rep	M	0:03:05.934-0:03:06.200	CS1a	0.081491	8	0.305284
Trial 1	1.3	Rep	M	0:03:06.200-0:03:06.466	CS1a	0.0994123	8	0.372425
Trial 1	1.3	Rep	M	0:03:06.466-0:03:06.732	CS1a	0.0806307	8	0.302062
Trial 1	1.3	Rep	M	0:03:06.732-0:03:06.998	CS1a	0.139628	8	0.523078
Trial 1	1.3	Rep	M	0:03:06.998-0:03:07.264	CS1a	0.0761021	8	0.285096
Trial 1	1.3	Rep	M	0:03:07.264-0:03:07.530	CS1a	0.138699	8	0.519599
Trial 1	1.3	Rep	M	0:03:07.530-0:03:07.796	CS1a	0.147459	8	0.552423
Trial 1	1.3	Rep	M	0:03:07.796-0:03:08.062	CS1a	0.28521	8	1.06846
Trial 1	1.3	Rep	M	0:03:08.062-0:03:08.328	CS1a	0.400995	8	1.50223
Trial 1	1.3	Rep	M	0:03:08.328-0:03:08.594	CS1a	0.326031	8	1.22139
Trial 1	1.3	Rep	M	0:03:08.594-0:03:08.860	CS1a	0.727311	8	2.72469
Trial 1	1.3	Rep	M	0:03:08.860-0:03:09.126	CS1a	1.38282	8	5.1804
Trial 1	1.3	Rep	M	0:03:09.126-0:03:09.392	CS1a	2.45912	8	9.21247
Trial 1	1.3	Rep	M	0:03:09.392-0:03:09.658	CS1a	4.54391	8	17.0227
Trial 1	1.3	Rep	M	0:03:09.658-0:03:09.924	CS1a	4.53408	8	16.9858
Trial 1	1.3	Rep	M	0:03:09.924-0:03:10.190	CS1a	2.94572	7	12.6119
Trial 1	1.3	Rep	M	0:03:10.190-0:03:10.456	CS1b	2.30477	8	8.63426
Trial 1	1.3	Rep	M	0:03:10.456-0:03:10.722	CS1b	4.4116	8	16.5269
Trial 1	1.3	Rep	M	0:03:10.722-0:03:10.988	CS1b	2.28182	8	8.54826
Trial 1	1.3	Rep	M	0:03:10.988-0:03:11.254	CS1b	0.578683	8	2.16789
Trial 1	1.3	Rep	M	0:03:11.254-0:03:11.520	CS1b	0.270031	8	1.0116
Trial 1	1.3	Rep	M	0:03:11.520-0:03:11.786	CS1b	0.291629	8	1.09251
Trial 1	1.3	Rep	M	0:03:11.786-0:03:12.052	CS1b	0.0945797	8	0.354318
Trial 1	1.3	Rep	M	0:03:12.052-0:03:12.318	CS1b	0.164954	8	0.617955
Trial 1	1.3	Rep	M	0:03:12.318-0:03:12.584	CS1b	0.160351	8	0.600719
Trial 1	1.3	Rep	M	0:03:12.584-0:03:12.850	CS1b	0.100931	8	0.378112
Trial 1	1.3	Rep	M	0:03:12.850-0:03:13.116	CS1b	3.45079	8	12.9276
Trial 1	1.3	Rep	M	0:03:13.116-0:03:13.382	CS1b	7.04455	8	26.3906
Trial 1	1.3	Rep	M	0:03:13.382-0:03:13.648	CS1b	6.53874	8	24.4957
Trial 1	1.3	Rep	M	0:03:13.648-0:03:13.914	CS1b	3.46123	8	12.9667
Trial 1	1.3	Rep	M	0:03:13.914-0:03:14.180	CS1b	1.7656	8	6.61437
Trial 1	1.3	Rep	M	0:03:14.180-0:03:14.446	CS1b	0.295989	8	1.10885
Trial 1	1.3	Rep	M	0:03:14.446-0:03:14.712	CS1b	0.187902	8	0.703927
Trial 1	1.3	Rep	M	0:03:14.712-0:03:14.978	CS1b	0.106568	8	0.39923
Trial 1	1.3	Rep	M	0:03:14.978-0:03:15.244	CS1b	0.114387	8	0.428522
Trial 1	1.3	Rep	M	0:03:15.244-0:03:15.510	CS1b	0.148963	8	0.55805
Trial 1	1.3	Rep	M	0:03:15.510-0:03:15.776	CS1b	0.156918	8	0.587858
Trial 1	1.3	Rep	M	0:03:15.776-0:03:16.042	CS1b	0.115882	8	0.434125
Trial 1	1.3	Rep	M	0:03:16.042-0:03:16.308	CS1b	0.103925	8	0.389328
Trial 1	1.3	Rep	M	0:03:16.308-0:03:16.574	CS1b	0.153722	8	0.575882
Trial 1	1.3	Rep	M	0:03:16.574-0:03:16.840	CS1b	0.0928337	8	0.347777
Trial 1	1.3	Rep	M	0:03:16.840-0:03:17.106	CS1b	0.0820867	8	0.30752
Trial 1	1.3	Rep	M	0:03:17.106-0:03:17.372	CS1b	0.0885711	8	0.331808
Trial 1	1.3	Rep	M	0:03:17.372-0:03:17.638	CS1b	0.0894623	8	0.335147
Trial 1	1.3	Rep	M	0:03:17.638-0:03:17.904	CS1b	0.312376	8	1.17025
Trial 1	1.3	Rep	M	0:03:17.904-0:03:18.170	CS1b	2.60694	8	9.76624
Trial 1	1.3	Rep	M	0:03:18.170-0:03:18.436	CS1b	7.81368	8	29.2721
Trial 1	1.3	Rep	M	0:03:18.436-0:03:18.702	CS1b	6.21479	8	23.2821
Trial 1	1.3	Rep	M	0:03:18.702-0:03:18.968	CS1b	4.21683	8	15.7973
Trial 1	1.3	Rep	M	0:03:18.968-0:03:19.234	CS1b	1.92194	8	7.2001
Trial 1	1.3	Rep	M	0:03:19.234-0:03:19.500	CS1b	0.284302	8	1.06507
Trial 1	1.3	Rep	M	0:03:19.500-0:03:19.766	CS1b	0.107445	7	0.460017
Trial 1	1.3	Rep	M	0:03:19.766-0:03:20.032	CS1b	0.16732	8	0.626826
Trial 1	1.3	Rep	M	0:03:20.032-0:03:20.298	IT1	0.172579	8	0.646525
Trial 1	1.3	Rep	M	0:03:20.298-0:03:20.564	IT1	0.241543	8	0.904881
Trial 1	1.3	Rep	M	0:03:20.564-0:03:20.830	IT1	0.119193	8	0.446528
Trial 1	1.3	Rep	M	0:03:20.830-0:03:21.096	IT1	0.0530205	8	0.198628
Trial 1	1.3	Rep	M	0:03:21.096-0:03:21.362	IT1	0.128866	8	0.482763
Trial 1	1.3	Rep	M	0:03:21.362-0:03:21.628	IT1	0.10943	8	0.409953
Trial 1	1.3	Rep	M	0:03:21.628-0:03:21.894	IT1	0.189038	8	0.708183
Trial 1	1.3	Rep	M	0:03:21.894-0:03:22.160	IT1	0.132519	8	0.496451
Trial 1	1.3	Rep	M	0:03:22.160-0:03:22.426	IT1	0.157824	8	0.591247
Trial 1	1.3	Rep	M	0:03:22.426-0:03:22.692	IT1	0.186028	8	0.696908
Trial 1	1.3	Rep	M	0:03:22.692-0:03:22.958	IT1	0.0777446	8	0.291249
Trial 1	1.3	Rep	M	0:03:22.958-0:03:23.224	IT1	0.164497	8	0.616249
Trial 1	1.3	Rep	M	0:03:23.224-0:03:23.490	IT1	0.0943091	8	0.353305
Trial 1	1.3	Rep	M	0:03:23.490-0:03:23.756	IT1	0.15932	8	0.596853
Trial 1	1.3	Rep	M	0:03:23.756-0:03:24.022	IT1	0.074055	8	0.277429
Trial 1	1.3	Rep	M	0:03:24.022-0:03:24.288	IT1	0.0596186	8	0.223345
Trial 1	1.3	Rep	M	0:03:24.288-0:03:24.554	IT1	0.0632328	8	0.236885
Trial 1	1.3	Rep	M	0:03:24.554-0:03:24.820	IT1	0.125746	8	0.471074
Trial 1	1.3	Rep	M	0:03:24.820-0:03:25.086	IT1	0.0812997	8	0.304568
Trial 1	1.3	Rep	M	0:03:25.086-0:03:25.352	IT1	0.106108	8	0.39751
Trial 1	1.3	Rep	M	0:03:25.352-0:03:25.618	IT1	0.120176	8	0.450209
Trial 1	1.3	Rep	M	0:03:25.618-0:03:25.884	IT1	0.107206	8	0.401621
Trial 1	1.3	Rep	M	0:03:25.884-0:03:26.150	IT1	0.159603	8	0.597913
Trial 1	1.3	Rep	M	0:03:26.150-0:03:26.416	IT1	0.0866218	8	0.324506
Trial 1	1.3	Rep	M	0:03:26.416-0:03:26.682	IT1	0.205388	8	0.769435
Trial 1	1.3	Rep	M	0:03:26.682-0:03:26.948	IT1	0.0863567	8	0.323513
Trial 1	1.3	Rep	M	0:03:26.948-0:03:27.214	IT1	0.0805133	8	0.301623
Trial 1	1.3	Rep	M	0:03:27.214-0:03:27.480	IT1	0.124907	8	0.467933
Trial 1	1.3	Rep	M	0:03:27.480-0:03:27.746	IT1	0.1178	8	0.44131
Trial 1	1.3	Rep	M	0:03:27.746-0:03:28.012	IT1	0.0897286	8	0.336148
Trial 1	1.3	Rep	M	0:03:28.012-0:03:28.278	IT1	0.165099	8	0.618501
Trial 1	1.3	Rep	M	0:03:28.278-0:03:28.544	IT1	0.171755	8	0.643436
Trial 1	1.3	Rep	M	0:03:28.544-0:03:28.810	IT1	0.115658	8	0.433286
Trial 1	1.3	Rep	M	0:03:28.810-0:03:29.076	IT1	0.0893095	8	0.334576
Trial 1	1.3	Rep	M	0:03:29.076-0:03:29.342	IT1	0.0729472	7	0.312317
Trial 1	1.3	Rep	M	0:03:29.342-0:03:29.608	IT1	0.0701599	8	0.262836
Trial 1	1.3	Rep	M	0:03:29.608-0:03:29.874	IT1	0.16653	8	0.62386
Trial 1	1.3	Rep	M	0:03:29.874-0:03:30.140	IT1	0.110432	8	0.413708
Trial 1	1.3	Rep	M	0:03:30.140-0:03:30.406	IT1	0.245531	8	0.91982
Trial 1	1.3	Rep	M	0:03:30.406-0:03:30.672	IT1	0.139928	8	0.524204
Trial 1	1.3	Rep	M	0:03:30.672-0:03:30.938	IT1	0.220039	8	0.824322
Trial 1	1.3	Rep	M	0:03:30.938-0:03:31.204	IT1	0.0904585	8	0.338879
Trial 1	1.3	Rep	M	0:03:31.204-0:03:31.470	IT1	0.0674742	8	0.252776
Trial 1	1.3	Rep	M	0:03:31.470-0:03:31.736	IT1	0.0691797	8	0.259163
Trial 1	1.3	Rep	M	0:03:31.736-0:03:32.002	IT1	0.0950077	8	0.35592
Trial 1	1.3	Rep	M	0:03:32.002-0:03:32.268	IT1	0.154584	8	0.579114
Trial 1	1.3	Rep	M	0:03:32.268-0:03:32.534	IT1	0.0742363	8	0.278107
Trial 1	1.3	Rep	M	0:03:32.534-0:03:32.800	IT1	0.145889	8	0.546536
Trial 1	1.3	Rep	M	0:03:32.800-0:03:33.066	IT1	0.130805	8	0.490026
Trial 1	1.3	Rep	M	0:03:33.066-0:03:33.332	IT1	0.141968	8	0.531848
Trial 1	1.3	Rep	M	0:03:33.332-0:03:33.598	IT1	0.0605901	8	0.226985
Trial 1	1.3	Rep	M	0:03:33.598-0:03:33.864	IT1	0.0846588	8	0.317152
Trial 1	1.3	Rep	M	0:03:33.864-0:03:34.130	IT1	0.0988779	8	0.370422
Trial 1	1.3	Rep	M	0:03:34.130-0:03:34.396	IT1	0.0571837	8	0.214225
Trial 1	1.3	Rep	M	0:03:34.396-0:03:34.662	IT1	0.159711	8	0.598318
Trial 1	1.3	Rep	M	0:03:34.662-0:03:34.928	IT1	0.0514182	8	0.192626
Trial 1	1.3	Rep	M	0:03:34.928-0:03:35.194	IT1	0.184	8	0.689314
Trial 1	1.3	Rep	M	0:03:35.194-0:03:35.460	IT1	0.0655498	8	0.245566
Trial 1	1.3	Rep	M	0:03:35.460-0:03:35.726	IT1	0.141797	8	0.531206
Trial 1	1.3	Rep	M	0:03:35.726-0:03:35.992	IT1	0.170837	8	0.639998
Trial 1	1.3	Rep	M	0:03:35.992-0:03:36.258	IT1	0.14962	8	0.560512
Trial 1	1.3	Rep	M	0:03:36.258-0:03:36.524	IT1	0.120992	8	0.453266
Trial 1	1.3	Rep	M	0:03:36.524-0:03:36.790	IT1	0.037959	8	0.142204
Trial 1	1.3	Rep	M	0:03:36.790-0:03:37.056	IT1	0.187045	8	0.700712
Trial 1	1.3	Rep	M	0:03:37.056-0:03:37.322	IT1	0.04881	8	0.182854
Trial 1	1.3	Rep	M	0:03:37.322-0:03:37.588	IT1	0.36823	8	1.37948
Trial 1	1.3	Rep	M	0:03:37.588-0:03:37.854	IT1	0.42854	8	1.60541
Trial 1	1.3	Rep	M	0:03:37.854-0:03:38.120	IT1	0.366285	8	1.37221
Trial 1	1.3	Rep	M	0:03:38.120-0:03:38.386	IT1	0.402854	8	1.5092
Trial 1	1.3	Rep	M	0:03:38.386-0:03:38.652	IT1	0.777006	8	2.91086
Trial 1	1.3	Rep	M	0:03:38.652-0:03:38.918	IT1	0.3674	7	1.57299
Trial 1	1.3	Rep	M	0:03:38.918-0:03:39.184	IT1	0.420081	8	1.57374
Trial 1	1.3	Rep	M	0:03:39.184-0:03:39.450	IT1	0.334277	8	1.25228
Trial 1	1.3	Rep	M	0:03:39.450-0:03:39.716	IT1	0.168677	8	0.631908
Trial 1	1.3	Rep	M	0:03:39.716-0:03:39.982	IT1	0.170631	8	0.639223
Trial 1	1.3	Rep	M	0:03:39.982-0:03:40.248	IT1	0.171803	8	0.643614
Trial 1	1.3	Rep	M	0:03:40.248-0:03:40.514	IT1	0.369319	8	1.38356
Trial 1	1.3	Rep	M	0:03:40.514-0:03:40.780	IT1	0.313362	8	1.17393
Trial 1	1.3	Rep	M	0:03:40.780-0:03:41.046	IT1	0.423976	8	1.58832
Trial 1	1.3	Rep	M	0:03:41.046-0:03:41.312	IT1	0.226387	8	0.848102
Trial 1	1.3	Rep	M	0:03:41.312-0:03:41.578	IT1	0.123002	8	0.460794
Trial 1	1.3	Rep	M	0:03:41.578-0:03:41.844	IT1	0.153248	8	0.574107
Trial 1	1.3	Rep	M	0:03:41.844-0:03:42.110	IT1	0.10139	8	0.379832
Trial 1	1.3	Rep	M	0:03:42.110-0:03:42.376	IT1	0.123254	8	0.46174
Trial 1	1.3	Rep	M	0:03:42.376-0:03:42.642	IT1	0.250727	8	0.939293
Trial 1	1.3	Rep	M	0:03:42.642-0:03:42.908	IT1	0.115676	8	0.433349
Trial 1	1.3	Rep	M	0:03:42.908-0:03:43.174	IT1	0.0867186	8	0.324871
Trial 1	1.3	Rep	M	0:03:43.174-0:03:43.440	IT1	0.104436	8	0.391243
Trial 1	1.3	Rep	M	0:03:43.440-0:03:43.706	IT1	0.068007	8	0.254771
Trial 1	1.3	Rep	M	0:03:43.706-0:03:43.972	IT1	0.27839	8	1.04291
Trial 1	1.3	Rep	M	0:03:43.972-0:03:44.238	IT1	0.346373	8	1.2976
Trial 1	1.3	Rep	M	0:03:44.238-0:03:44.504	IT1	0.321222	8	1.20338
Trial 1	1.3	Rep	M	0:03:44.504-0:03:44.770	IT1	0.270131	8	1.01197
Trial 1	1.3	Rep	M	0:03:44.770-0:03:45.036	IT1	0.121615	8	0.4556
Trial 1	1.3	Rep	M	0:03:45.036-0:03:45.302	IT1	0.217359	8	0.814279
Trial 1	1.3	Rep	M	0:03:45.302-0:03:45.568	IT1	0.198244	8	0.74267
Trial 1	1.3	Rep	M	0:03:45.568-0:03:45.834	IT1	0.138458	8	0.518699
Trial 1	1.3	Rep	M	0:03:45.834-0:03:46.100	IT1	0.0795849	8	0.298145
Trial 1	1.3	Rep	M	0:03:46.100-0:03:46.366	IT1	0.0863307	8	0.323418
Trial 1	1.3	Rep	M	0:03:46.366-0:03:46.632	IT1	0.149743	8	0.560974
Trial 1	1.3	Rep	M	0:03:46.632-0:03:46.898	IT1	0.156625	8	0.586757
Trial 1	1.3	Rep	M	0:03:46.898-0:03:47.164	IT1	0.127615	8	0.478075
Trial 1	1.3	Rep	M	0:03:47.164-0:03:47.430	IT1	0.129292	8	0.484357
Trial 1	1.3	Rep	M	0:03:47.430-0:03:47.696	IT1	0.112696	8	0.422189
Trial 1	1.3	Rep	M	0:03:47.696-0:03:47.962	IT1	0.103067	8	0.386113
Trial 1	1.3	Rep	M	0:03:47.962-0:03:48.228	IT1	0.14577	7	0.624103
Trial 1	1.3	Rep	M	0:03:48.228-0:03:48.494	IT1	0.0671117	8	0.251417
Trial 1	1.3	Rep	M	0:03:48.494-0:03:48.760	IT1	0.0479699	8	0.179707
Trial 1	1.3	Rep	M	0:03:48.760-0:03:49.026	IT1	0.0390393	8	0.14625
Trial 1	1.3	Rep	M	0:03:49.026-0:03:49.292	IT1	0.0337082	8	0.126279
Trial 1	1.3	Rep	M	0:03:49.292-0:03:49.558	IT1	0.111664	8	0.418322
Trial 1	1.3	Rep	M	0:03:49.558-0:03:49.824	IT1	0.086612	8	0.324472
Trial 1	1.3	Rep	M	0:03:49.824-0:03:50.090	IT1	0.214663	8	0.80418
Trial 1	1.3	Rep	M	0:03:50.090-0:03:50.356	IT1	0.0708256	8	0.26533
Trial 1	1.3	Rep	M	0:03:50.356-0:03:50.622	IT1	0.125747	8	0.471081
Trial 1	1.3	Rep	M	0:03:50.622-0:03:50.888	IT1	0.584355	8	2.18914
Trial 1	1.3	Rep	M	0:03:50.888-0:03:51.154	IT1	0.276918	8	1.03741
Trial 1	1.3	Rep	M	0:03:51.154-0:03:51.420	IT1	0.170622	8	0.639188
Trial 1	1.3	Rep	M	0:03:51.420-0:03:51.686	IT1	0.057863	8	0.216768
Trial 1	1.3	Rep	M	0:03:51.686-0:03:51.952	IT1	0.14621	8	0.54774
Trial 1	1.3	Rep	M	0:03:51.952-0:03:52.218	IT1	0.159437	8	0.597289
Trial 1	1.3	Rep	M	0:03:52.218-0:03:52.484	IT1	0.110703	8	0.414722
Trial 1	1.3	Rep	M	0:03:52.484-0:03:52.750	IT1	0.0716113	8	0.268273
Trial 1	1.3	Rep	M	0:03:52.750-0:03:53.016	IT1	0.595731	8	2.23175
Trial 1	1.3	Rep	M	0:03:53.016-0:03:53.282	IT1	0.211573	8	0.79261
Trial 1	1.3	Rep	M	0:03:53.282-0:03:53.548	IT1	0.141195	8	0.528951
Trial 1	1.3	Rep	M	0:03:53.548-0:03:53.814	IT1	0.107838	8	0.403988
Trial 1	1.3	Rep	M	0:03:53.814-0:03:54.080	IT1	0.0802649	8	0.300692
Trial 1	1.3	Rep	M	0:03:54.080-0:03:54.346	IT1	0.0768768	8	0.288
Trial 1	1.3	Rep	M	0:03:54.346-0:03:54.612	IT1	0.15452	8	0.578871
Trial 1	1.3	Rep	M	0:03:54.612-0:03:54.878	IT1	0.0868565	8	0.325385
Trial 1	1.3	Rep	M	0:03:54.878-0:03:55.144	IT1	0.083498	8	0.312805
Trial 1	1.3	Rep	M	0:03:55.144-0:03:55.410	IT1	0.0781631	8	0.292818
Trial 1	1.3	Rep	M	0:03:55.410-0:03:55.676	IT1	0.0890432	8	0.333578
Trial 1	1.3	Rep	M	0:03:55.676-0:03:55.942	IT1	0.0377208	8	0.141312
Trial 1	1.3	Rep	M	0:03:55.942-0:03:56.208	IT1	0.16857	8	0.631506
Trial 1	1.3	Rep	M	0:03:56.208-0:03:56.474	IT1	0.15791	8	0.59157
Trial 1	1.3	Rep	M	0:03:56.474-0:03:56.740	IT1	0.139959	8	0.524318
Trial 1	1.3	Rep	M	0:03:56.740-0:03:57.006	IT1	0.058915	8	0.220709
Trial 1	1.3	Rep	M	0:03:57.006-0:03:57.272	IT1	0.122623	8	0.459381
Trial 1	1.3	Rep	M	0:03:57.272-0:03:57.538	IT1	0.147632	8	0.553066
Trial 1	1.3	Rep	M	0:03:57.538-0:03:57.804	IT1	0.0414172	7	0.177324
Trial 1	1.3	Rep	M	0:03:57.804-0:03:58.070	IT1	0.0758091	8	0.283999
Trial 1	1.3	Rep	M	0:03:58.070-0:03:58.336	IT1	0.0591413	8	0.221557
Trial 1	1.3	Rep	M	0:03:58.336-0:03:58.602	IT1	0.0605065	8	0.226671
Trial 1	1.3	Rep	M	0:03:58.602-0:03:58.868	IT1	0.147139	8	0.551223
Trial 1	1.3	Rep	M	0:03:58.868-0:03:59.134	IT1	0.145829	8	0.546313
Trial 1	1.3	Rep	M	0:03:59.134-0:03:59.400	IT1	0.0746643	8	0.279712
Trial 1	1.3	Rep	M	0:03:59.400-0:03:59.666	IT1	0.0454231	8	0.170166
Trial 1	1.3	Rep	M	0:03:59.666-0:03:59.932	IT1	0.071762	8	0.26884
Trial 1	1.3	Rep	M	0:03:59.932-0:04:00.198	IT1	0.0558	8	0.209042
Trial 1	1.3	Rep	M	0:04:00.198-0:04:00.464	IT1	0.15657	8	0.586552
Trial 1	1.3	Rep	M	0:04:00.464-0:04:00.730	IT1	0.0833147	8	0.31212
Trial 1	1.3	Rep	M	0:04:00.730-0:04:00.996	IT1	0.0793356	8	0.297209
Trial 1	1.3	Rep	M	0:04:00.996-0:04:01.262	IT1	0.0561159	8	0.210224
Trial 1	1.3	Rep	M	0:04:01.262-0:04:01.528	IT1	0.125553	8	0.470356
Trial 1	1.3	Rep	M	0:04:01.528-0:04:01.794	IT1	0.14681	8	0.549986
Trial 1	1.3	Rep	M	0:04:01.794-0:04:02.060	IT1	0.0584772	8	0.219072
Trial 1	1.3	Rep	M	0:04:02.060-0:04:02.326	IT1	0.0919164	8	0.344341
Trial 1	1.3	Rep	M	0:04:02.326-0:04:02.592	IT1	0.0618431	8	0.231679
Trial 1	1.3	Rep	M	0:04:02.592-0:04:02.858	IT1	0.0780614	8	0.29244
Trial 1	1.3	Rep	M	0:04:02.858-0:04:03.124	IT1	0.081537	8	0.305458
Trial 1	1.3	Rep	M	0:04:03.124-0:04:03.390	IT1	0.208373	8	0.780619
Trial 1	1.3	Rep	M	0:04:03.390-0:04:03.656	IT1	0.118905	8	0.445448
Trial 1	1.3	Rep	M	0:04:03.656-0:04:03.922	IT1	0.0981409	8	0.36766
Trial 1	1.3	Rep	M	0:04:03.922-0:04:04.188	IT1	0.0483642	8	0.181185
Trial 1	1.3	Rep	M	0:04:04.188-0:04:04.454	IT1	0.108457	8	0.406304
Trial 1	1.3	Rep	M	0:04:04.454-0:04:04.720	IT1	0.0544464	8	0.203969
Trial 1	1.3	Rep	M	0:04:04.720-0:04:04.986	IT1	0.126393	8	0.473499
Trial 1	1.3	Rep	M	0:04:04.986-0:04:05.252	IT1	0.145963	8	0.546811
Trial 1	1.3	Rep	M	0:04:05.252-0:04:05.518	IT1	0.137377	8	0.514652
Trial 1	1.3	Rep	M	0:04:05.518-0:04:05.784	IT1	0.0790601	8	0.296178
Trial 1	1.3	Rep	M	0:04:05.784-0:04:06.050	IT1	0.0385403	8	0.144382
Trial 1	1.3	Rep	M	0:04:06.050-0:04:06.316	IT1	0.0716978	8	0.268597
Trial 1	1.3	Rep	M	0:04:06.316-0:04:06.582	IT1	0.155413	8	0.582213
Trial 1	1.3	Rep	M	0:04:06.582-0:04:06.848	IT1	0.78593	8	2.94427
Trial 1	1.3	Rep	M	0:04:06.848-0:04:07.114	IT1	0.373316	8	1.39853
Trial 1	1.3	Rep	M	0:04:07.114-0:04:07.380	IT1	0.256415	7	1.09782
Trial 1	1.3	Rep	M	0:04:07.380-0:04:07.646	IT1	0.324597	8	1.21603
Trial 1	1.3	Rep	M	0:04:07.646-0:04:07.912	IT1	0.301759	8	1.13046
Trial 1	1.3	Rep	M	0:04:07.912-0:04:08.178	IT1	0.326644	8	1.22369
Trial 1	1.3	Rep	M	0:04:08.178-0:04:08.444	IT1	0.485407	8	1.81846
Trial 1	1.3	Rep	M	0:04:08.444-0:04:08.710	IT1	1.23807	8	4.63813
Trial 1	1.3	Rep	M	0:04:08.710-0:04:08.976	IT1	2.6694	8	10.0002
Trial 1	1.3	Rep	M	0:04:08.976-0:04:09.242	IT1	0.265921	8	0.996204
Trial 1	1.3	Rep	M	0:04:09.242-0:04:09.508	IT1	0.415273	8	1.55572
Trial 1	1.3	Rep	M	0:04:09.508-0:04:09.774	IT1	0.965995	8	3.61886
Trial 1	1.3	Rep	M	0:04:09.774-0:04:10.040	IT1	0.30839	8	1.15531
Trial 1	1.3	Rep	M	0:04:10.040-0:04:10.306	IT1	0.33154	8	1.24203
Trial 1	1.3	Rep	M	0:04:10.306-0:04:10.572	IT1	0.493758	8	1.84973
Trial 1	1.3	Rep	M	0:04:10.572-0:04:10.838	IT1	2.28572	8	8.56289
Trial 1	1.3	Rep	M	0:04:10.838-0:04:11.104	IT1	1.39275	8	5.21758
Trial 1	1.3	Rep	M	0:04:11.104-0:04:11.370	IT1	0.35624	8	1.33456
Trial 1	1.3	Rep	M	0:04:11.370-0:04:11.636	IT1	0.568165	8	2.12849
Trial 1	1.3	Rep	M	0:04:11.636-0:04:11.902	IT1	0.807101	8	3.02359
Trial 1	1.3	Rep	M	0:04:11.902-0:04:12.168	IT1	0.730372	8	2.73614
Trial 1	1.3	Rep	M	0:04:12.168-0:04:12.434	IT1	1.82348	8	6.8312
Trial 1	1.3	Rep	M	0:04:12.434-0:04:12.700	IT1	1.86872	8	7.00067
Trial 1	1.3	Rep	M	0:04:12.700-0:04:12.966	IT1	3.27864	8	12.2826
Trial 1	1.3	Rep	M	0:04:12.966-0:04:13.232	IT1	3.85629	8	14.4466
Trial 1	1.3	Rep	M	0:04:13.232-0:04:13.498	IT1	4.38635	8	16.4324
Trial 1	1.3	Rep	M	0:04:13.498-0:04:13.764	IT1	4.93194	8	18.4762
Trial 1	1.3	Rep	M	0:04:13.764-0:04:14.030	IT1	2.33464	8	8.74615
Trial 1	1.3	Rep	M	0:04:14.030-0:04:14.296	IT1	0.543881	8	2.03752
Trial 1	1.3	Rep	M	0:04:14.296-0:04:14.562	IT1	1.13186	8	4.24024
Trial 1	1.3	Rep	M	0:04:14.562-0:04:14.828	IT1	0.808402	8	3.02848
Trial 1	1.3	Rep	M	0:04:14.828-0:04:15.094	IT1	0.548656	8	2.0554
Trial 1	1.3	Rep	M	0:04:15.094-0:04:15.360	IT1	0.598505	8	2.24215
Trial 1	1.3	Rep	M	0:04:15.360-0:04:15.626	IT1	1.32964	8	4.98117
Trial 1	1.3	Rep	M	0:04:15.626-0:04:15.892	IT1	2.03299	8	7.61608
Trial 1	1.3	Rep	M	0:04:15.892-0:04:16.158	IT1	2.1001	8	7.8675
Trial 1	1.3	Rep	M	0:04:16.158-0:04:16.424	IT1	1.07336	8	4.02105
Trial 1	1.3	Rep	M	0:04:16.424-0:04:16.690	IT1	1.03783	7	4.44341
Trial 1	1.3	Rep	M	0:04:16.690-0:04:16.956	IT1	0.613105	8	2.29684
Trial 1	1.3	Rep	M	0:04:16.956-0:04:17.222	IT1	0.771536	8	2.89039
Trial 1	1.3	Rep	M	0:04:17.222-0:04:17.488	IT1	0.817324	8	3.06188
Trial 1	1.3	Rep	M	0:04:17.488-0:04:17.754	IT1	0.493664	8	1.84939
Trial 1	1.3	Rep	M	0:04:17.754-0:04:18.020	IT1	0.278061	8	1.04168
Trial 1	1.3	Rep	M	0:04:18.020-0:04:18.286	IT1	0.875359	8	3.2793
Trial 1	1.3	Rep	M	0:04:18.286-0:04:18.552	IT1	0.396907	8	1.48691
Trial 1	1.3	Rep	M	0:04:18.552-0:04:18.818	IT1	0.40438	8	1.51491
Trial 1	1.3	Rep	M	0:04:18.818-0:04:19.084	IT1	0.482695	8	1.8083
Trial 1	1.3	Rep	M	0:04:19.084-0:04:19.350	IT1	0.271982	8	1.01891
Trial 1	1.3	Rep	M	0:04:19.350-0:04:19.616	IT1	0.259215	8	0.97108
Trial 1	1.3	Rep	M	0:04:19.616-0:04:19.882	IT1	0.177452	8	0.664781
Trial 1	1.3	Rep	M	0:04:19.882-0:04:20.148	IT1	0.279948	8	1.04875
Trial 1	1.3	Rep	M	0:04:20.148-0:04:20.414	IT1	0.119441	8	0.447455
Trial 1	1.3	Rep	M	0:04:20.414-0:04:20.680	IT1	0.0690955	8	0.25885
Trial 1	1.3	Rep	M	0:04:20.680-0:04:20.946	IT1	0.128589	8	0.481728
Trial 1	1.3	Rep	M	0:04:20.946-0:04:21.212	IT1	0.105753	8	0.39618
Trial 1	1.3	Rep	M	0:04:21.212-0:04:21.478	IT1	0.173023	8	0.648185
Trial 1	1.3	Rep	M	0:04:21.478-0:04:21.744	IT1	0.18184	8	0.681221
Trial 1	1.3	Rep	M	0:04:21.744-0:04:22.010	IT1	0.309517	8	1.15953
Trial 1	1.3	Rep	M	0:04:22.010-0:04:22.276	IT1	1.04227	8	3.9046
Trial 1	1.3	Rep	M	0:04:22.276-0:04:22.542	IT1	0.929857	8	3.48348
Trial 1	1.3	Rep	M	0:04:22.542-0:04:22.808	IT1	0.63146	8	2.3656
Trial 1	1.3	Rep	M	0:04:22.808-0:04:23.074	IT1	0.29338	8	1.09908
Trial 1	1.3	Rep	M	0:04:23.074-0:04:23.340	IT1	0.429093	8	1.60749
Trial 1	1.3	Rep	M	0:04:23.340-0:04:23.606	IT1	0.385185	8	1.443
Trial 1	1.3	Rep	M	0:04:23.606-0:04:23.872	IT1	0.987157	8	3.69815
Trial 1	1.3	Rep	M	0:04:23.872-0:04:24.138	IT1	2.51968	8	9.43933
Trial 1	1.3	Rep	M	0:04:24.138-0:04:24.404	IT1	2.89222	8	10.835
Trial 1	1.3	Rep	M	0:04:24.404-0:04:24.670	IT1	4.13823	8	15.5028
Trial 1	1.3	Rep	M	0:04:24.670-0:04:24.936	IT1	4.53465	8	16.9879
Trial 1	1.3	Rep	M	0:04:24.936-0:04:25.202	IT1	2.97008	8	11.1267
Trial 1	1.3	Rep	M	0:04:25.202-0:04:25.468	IT1	1.18028	8	4.42162
Trial 1	1.3	Rep	M	0:04:25.468-0:04:25.734	IT1	0.600179	8	2.24842
Trial 1	1.3	Rep	M	0:04:25.734-0:04:26.000	IT1	0.21191	8	0.793864
Trial 1	1.3	Rep	M	0:04:26.000-0:04:26.266	IT1	0.22828	7	0.97737
Trial 1	1.3	Rep	M	0:04:26.266-0:04:26.532	IT1	0.90534	8	3.39165
Trial 1	1.3	Rep	M	0:04:26.532-0:04:26.798	IT1	1.32651	8	4.96944
Trial 1	1.3	Rep	M	0:04:26.798-0:04:27.064	IT1	0.936112	8	3.50691
Trial 1	1.3	Rep	M	0:04:27.064-0:04:27.330	IT1	0.568385	8	2.12932
Trial 1	1.3	Rep	M	0:04:27.330-0:04:27.596	IT1	0.292456	8	1.09561
Trial 1	1.3	Rep	M	0:04:27.596-0:04:27.862	IT1	0.160085	8	0.599721
Trial 1	1.3	Rep	M	0:04:27.862-0:04:28.128	IT1	0.202775	8	0.759643
Trial 1	1.3	Rep	M	0:04:28.128-0:04:28.394	IT1	0.0826083	8	0.309471
Trial 1	1.3	Rep	M	0:04:28.394-0:04:28.660	IT1	0.147581	8	0.552878
Trial 1	1.3	Rep	M	0:04:28.660-0:04:28.926	IT1	0.0315809	8	0.118309
Trial 1	1.3	Rep	M	0:04:28.926-0:04:29.192	IT1	0.16018	8	0.600078
Trial 1	1.3	Rep	M	0:04:29.192-0:04:29.458	IT1	0.13142	8	0.492333
Trial 1	1.3	Rep	M	0:04:29.458-0:04:29.724	IT1	0.188651	8	0.706732
Trial 1	1.3	Rep	M	0:04:29.724-0:04:29.990	IT1	0.189372	8	0.709436
Trial 1	1.3	Rep	M	0:04:29.990-0:04:30.256	IT1	0.107152	8	0.401416
Trial 1	1.3	Rep	M	0:04:30.256-0:04:30.522	CS2a	0.0425969	8	0.159578
Trial 1	1.3	Rep	M	0:04:30.522-0:04:30.788	CS2a	0.110709	8	0.414743
Trial 1	1.3	Rep	M	0:04:30.788-0:04:31.054	CS2a	0.157639	8	0.590555
Trial 1	1.3	Rep	M	0:04:31.054-0:04:31.320	CS2a	0.0989072	8	0.370532
Trial 1	1.3	Rep	M	0:04:31.320-0:04:31.586	CS2a	0.10908	8	0.408638
Trial 1	1.3	Rep	M	0:04:31.586-0:04:31.852	CS2a	0.0675936	8	0.253224
Trial 1	1.3	Rep	M	0:04:31.852-0:04:32.118	CS2a	0.0895546	8	0.335494
Trial 1	1.3	Rep	M	0:04:32.118-0:04:32.384	CS2a	0.0717762	8	0.268892
Trial 1	1.3	Rep	M	0:04:32.384-0:04:32.650	CS2a	0.0542844	8	0.203363
Trial 1	1.3	Rep	M	0:04:32.650-0:04:32.916	CS2a	0.0939282	8	0.351877
Trial 1	1.3	Rep	M	0:04:32.916-0:04:33.182	CS2a	0.0512544	8	0.192011
Trial 1	1.3	Rep	M	0:04:33.182-0:04:33.448	CS2a	0.137935	8	0.516741
Trial 1	1.3	Rep	M	0:04:33.448-0:04:33.714	CS2a	0.101031	8	0.378486
Trial 1	1.3	Rep	M	0:04:33.714-0:04:33.980	CS2a	0.120805	8	0.452567
Trial 1	1.3	Rep	M	0:04:33.980-0:04:34.246	CS2a	0.040876	8	0.153131
Trial 1	1.3	Rep	M	0:04:34.246-0:04:34.512	CS2a	0.0428285	8	0.160448
Trial 1	1.3	Rep	M	0:04:34.512-0:04:34.778	CS2a	0.108699	8	0.40721
Trial 1	1.3	Rep	M	0:04:34.778-0:04:35.044	CS2a	0.0975038	8	0.365272
Trial 1	1.3	Rep	M	0:04:35.044-0:04:35.310	CS2a	0.0774225	8	0.290046
Trial 1	1.3	Rep	M	0:04:35.310-0:04:35.576	CS2a	0.0520654	8	0.195049
Trial 1	1.3	Rep	M	0:04:35.576-0:04:35.842	CS2a	0.170496	7	0.729968
Trial 1	1.3	Rep	M	0:04:35.842-0:04:36.108	CS2a	0.0242287	8	0.090767
Trial 1	1.3	Rep	M	0:04:36.108-0:04:36.374	CS2a	0.0423541	8	0.15867
Trial 1	1.3	Rep	M	0:04:36.374-0:04:36.640	CS2a	0.100542	8	0.376659
Trial 1	1.3	Rep	M	0:04:36.640-0:04:36.906	CS2a	0.131631	8	0.493123
Trial 1	1.3	Rep	M	0:04:36.906-0:04:37.172	CS2a	0.114333	8	0.42832
Trial 1	1.3	Rep	M	0:04:37.172-0:04:37.438	CS2a	0.100072	8	0.374897
Trial 1	1.3	Rep	M	0:04:37.438-0:04:37.704	CS2a	0.114725	8	0.429787
Trial 1	1.3	Rep	M	0:04:37.704-0:04:37.970	CS2a	0.0546123	8	0.20459
Trial 1	1.3	Rep	M	0:04:37.970-0:04:38.236	CS2a	0.136132	8	0.509982
Trial 1	1.3	Rep	M	0:04:38.236-0:04:38.502	CS2a	0.0905887	8	0.339367
Trial 1	1.3	Rep	M	0:04:38.502-0:04:38.768	CS2a	0.0940384	8	0.352292
Trial 1	1.3	Rep	M	0:04:38.768-0:04:39.034	CS2a	0.0863332	8	0.323425
Trial 1	1.3	Rep	M	0:04:39.034-0:04:39.300	CS2a	0.0972698	8	0.364396
Trial 1	1.3	Rep	M	0:04:39.300-0:04:39.566	CS2a	0.0536026	8	0.20081
Trial 1	1.3	Rep	M	0:04:39.566-0:04:39.832	CS2a	0.06741	8	0.252534
Trial 1	1.3	Rep	M	0:04:39.832-0:04:40.098	CS2a	0.0832476	8	0.311867
Trial 1	1.3	Rep	M	0:04:40.098-0:04:40.364	CS2b	0.143544	8	0.537753
Trial 1	1.3	Rep	M	0:04:40.364-0:04:40.630	CS2b	0.403302	8	1.51087
Trial 1	1.3	Rep	M	0:04:40.630-0:04:40.896	CS2b	0.431467	8	1.61638
Trial 1	1.3	Rep	M	0:04:40.896-0:04:41.162	CS2b	0.126715	8	0.474703
Trial 1	1.3	Rep	M	0:04:41.162-0:04:41.428	CS2b	0.0459229	8	0.172039
Trial 1	1.3	Rep	M	0:04:41.428-0:04:41.694	CS2b	0.0506943	8	0.189912
Trial 1	1.3	Rep	M	0:04:41.694-0:04:41.960	CS2b	0.0463446	8	0.173619
Trial 1	1.3	Rep	M	0:04:41.960-0:04:42.226	CS2b	0.0466789	8	0.174872
Trial 1	1.3	Rep	M	0:04:42.226-0:04:42.492	CS2b	0.0937043	8	0.351038
Trial 1	1.3	Rep	M	0:04:42.492-0:04:42.758	CS2b	0.0733431	8	0.274761
Trial 1	1.3	Rep	M	0:04:42.758-0:04:43.024	CS2b	0.132836	8	0.497639
Trial 1	1.3	Rep	M	0:04:43.024-0:04:43.290	CS2b	0.113553	8	0.425397
Trial 1	1.3	Rep	M	0:04:43.290-0:04:43.556	CS2b	0.181093	8	0.678417
Trial 1	1.3	Rep	M	0:04:43.556-0:04:43.822	CS2b	0.0824313	8	0.308808
Trial 1	1.3	Rep	M	0:04:43.822-0:04:44.088	CS2b	0.0578736	8	0.21681
Trial 1	1.3	Rep	M	0:04:44.088-0:04:44.354	CS2b	0.11627	8	0.435576
Trial 1	1.3	Rep	M	0:04:44.354-0:04:44.620	CS2b	0.0624259	8	0.233862
Trial 1	1.3	Rep	M	0:04:44.620-0:04:44.886	CS2b	0.127827	8	0.478874
Trial 1	1.3	Rep	M	0:04:44.886-0:04:45.152	CS2b	0.0644437	8	0.241421
Trial 1	1.3	Rep	M	0:04:45.152-0:04:45.418	CS2b	0.0575302	7	0.246313
Trial 1	1.3	Rep	M	0:04:45.418-0:04:45.684	CS2b	0.151093	8	0.566032
Trial 1	1.3	Rep	M	0:04:45.684-0:04:45.950	CS2b	1.33991	8	5.0196
Trial 1	1.3	Rep	M	0:04:45.950-0:04:46.216	CS2b	8.59617	8	32.2035
Trial 1	1.3	Rep	M	0:04:46.216-0:04:46.482	CS2b	7.65647	8	28.683
Trial 1	1.3	Rep	M	0:04:46.482-0:04:46.748	CS2b	4.92942	8	18.4668
Trial 1	1.3	Rep	M	0:04:46.748-0:04:47.014	CS2b	1.81948	8	6.81625
Trial 1	1.3	Rep	M	0:04:47.014-0:04:47.280	CS2b	0.432565	8	1.62049
Trial 1	1.3	Rep	M	0:04:47.280-0:04:47.546	CS2b	0.280687	8	1.05153
Trial 1	1.3	Rep	M	0:04:47.546-0:04:47.812	CS2b	0.228729	8	0.85688
Trial 1	1.3	Rep	M	0:04:47.812-0:04:48.078	CS2b	0.326375	8	1.22268
Trial 1	1.3	Rep	M	0:04:48.078-0:04:48.344	CS2b	0.14574	8	0.545978
Trial 1	1.3	Rep	M	0:04:48.344-0:04:48.610	CS2b	0.0935426	8	0.350434
Trial 1	1.3	Rep	M	0:04:48.610-0:04:48.876	CS2b	0.0817263	8	0.306167
Trial 1	1.3	Rep	M	0:04:48.876-0:04:49.142	CS2b	0.151233	8	0.566552
Trial 1	1.3	Rep	M	0:04:49.142-0:04:49.408	CS2b	0.110495	8	0.413941
Trial 1	1.3	Rep	M	0:04:49.408-0:04:49.674	CS2b	0.431177	8	1.6153
Trial 1	1.3	Rep	M	0:04:49.674-0:04:49.940	CS2b	2.09007	8	7.82991
Trial 1	1.3	Rep	M	0:04:49.940-0:04:50.206	CS2b	0.934098	8	3.49937
Trial 1	1.3	Rep	M	0:04:50.206-0:04:50.472	ITI2	0.22621	8	0.847436
Trial 1	1.3	Rep	M	0:04:50.472-0:04:50.738	ITI2	0.205291	8	0.769068
Trial 1	1.3	Rep	M	0:04:50.738-0:04:51.004	ITI2	0.122634	8	0.459418
Trial 1	1.3	Rep	M	0:04:51.004-0:04:51.270	ITI2	0.0425465	8	0.15939
Trial 1	1.3	Rep	M	0:04:51.270-0:04:51.536	ITI2	0.118249	8	0.44299
Trial 1	1.3	Rep	M	0:04:51.536-0:04:51.802	ITI2	0.0831592	8	0.311534
Trial 1	1.3	Rep	M	0:04:51.802-0:04:52.068	ITI2	0.111394	8	0.417312
Trial 1	1.3	Rep	M	0:04:52.068-0:04:52.334	ITI2	0.066797	8	0.25024
Trial 1	1.3	Rep	M	0:04:52.334-0:04:52.600	ITI2	0.151891	8	0.569024
Trial 1	1.3	Rep	M	0:04:52.600-0:04:52.866	ITI2	0.0588594	8	0.220502
Trial 1	1.3	Rep	M	0:04:52.866-0:04:53.132	ITI2	0.116526	8	0.43654
Trial 1	1.3	Rep	M	0:04:53.132-0:04:53.398	ITI2	0.0662743	8	0.248279
Trial 1	1.3	Rep	M	0:04:53.398-0:04:53.664	ITI2	0.14699	8	0.55066
Trial 1	1.3	Rep	M	0:04:53.664-0:04:53.930	ITI2	0.205424	8	0.769568
Trial 1	1.3	Rep	M	0:04:53.930-0:04:54.196	ITI2	0.0504494	8	0.188996
Trial 1	1.3	Rep	M	0:04:54.196-0:04:54.462	ITI2	0.0842496	8	0.315619
Trial 1	1.3	Rep	M	0:04:54.462-0:04:54.728	ITI2	0.101042	7	0.432603
Trial 1	1.3	Rep	M	0:04:54.728-0:04:54.994	ITI2	0.119087	8	0.446126
Trial 1	1.3	Rep	M	0:04:54.994-0:04:55.260	ITI2	0.0903507	8	0.338478
Trial 1	1.3	Rep	M	0:04:55.260-0:04:55.526	ITI2	0.0645825	8	0.241941
Trial 1	1.3	Rep	M	0:04:55.526-0:04:55.792	ITI2	0.0841597	8	0.315283
Trial 1	1.3	Rep	M	0:04:55.792-0:04:56.058	ITI2	0.0622341	8	0.233145
Trial 1	1.3	Rep	M	0:04:56.058-0:04:56.324	ITI2	0.265335	8	0.994015
Trial 1	1.3	Rep	M	0:04:56.324-0:04:56.590	ITI2	0.0633774	8	0.23743
Trial 1	1.3	Rep	M	0:04:56.590-0:04:56.856	ITI2	0.125474	8	0.470055
Trial 1	1.3	Rep	M	0:04:56.856-0:04:57.122	ITI2	0.107682	8	0.403403
Trial 1	1.3	Rep	M	0:04:57.122-0:04:57.388	ITI2	0.176505	8	0.661231
Trial 1	1.3	Rep	M	0:04:57.388-0:04:57.654	ITI2	0.0521933	8	0.195529
Trial 1	1.3	Rep	M	0:04:57.654-0:04:57.920	ITI2	0.0422919	8	0.158436
Trial 1	1.3	Rep	M	0:04:57.920-0:04:58.186	ITI2	0.103757	8	0.388698
Trial 1	1.3	Rep	M	0:04:58.186-0:04:58.452	ITI2	0.0756513	8	0.283408
Trial 1	1.3	Rep	M	0:04:58.452-0:04:58.718	ITI2	0.159578	8	0.597819
Trial 1	1.3	Rep	M	0:04:58.718-0:04:58.984	ITI2	0.0680625	8	0.254977
Trial 1	1.3	Rep	M	0:04:58.984-0:04:59.250	ITI2	0.196748	8	0.73707
Trial 1	1.3	Rep	M	0:04:59.250-0:04:59.516	ITI2	0.0664605	8	0.248977
Trial 1	1.3	Rep	M	0:04:59.516-0:04:59.782	ITI2	0.114766	8	0.429944
Trial 1	1.3	Rep	M	0:04:59.782-0:05:00.048	ITI2	0.133484	8	0.500069
Trial 1	1.3	Rep	M	0:05:00.048-0:05:00.314	ITI2	0.0884488	8	0.33135
Trial 1	1.3	Rep	M	0:05:00.314-0:05:00.580	ITI2	0.137479	8	0.515029
Trial 1	1.3	Rep	M	0:05:00.580-0:05:00.846	ITI2	0.12978	8	0.486189
Trial 1	1.3	Rep	M	0:05:00.846-0:05:01.112	ITI2	0.104363	8	0.39097
Trial 1	1.3	Rep	M	0:05:01.112-0:05:01.378	ITI2	0.0655973	8	0.245743
Trial 1	1.3	Rep	M	0:05:01.378-0:05:01.644	ITI2	0.0941148	8	0.352578
Trial 1	1.3	Rep	M	0:05:01.644-0:05:01.910	ITI2	0.115242	8	0.431727
Trial 1	1.3	Rep	M	0:05:01.910-0:05:02.176	ITI2	0.191182	8	0.716218
Trial 1	1.3	Rep	M	0:05:02.176-0:05:02.442	ITI2	0.191562	8	0.717642
Trial 1	1.3	Rep	M	0:05:02.442-0:05:02.708	ITI2	0.0903155	8	0.338345
Trial 1	1.3	Rep	M	0:05:02.708-0:05:02.974	ITI2	0.0882423	8	0.330578
Trial 1	1.3	Rep	M	0:05:02.974-0:05:03.240	ITI2	0.0939055	8	0.351792
Trial 1	1.3	Rep	M	0:05:03.240-0:05:03.506	ITI2	0.34451	8	1.29062
Trial 1	1.3	Rep	M	0:05:03.506-0:05:03.772	ITI2	0.177194	8	0.663813
Trial 1	1.3	Rep	M	0:05:03.772-0:05:04.038	ITI2	0.243459	8	0.912051
Trial 1	1.3	Rep	M	0:05:04.038-0:05:04.304	ITI2	0.319331	7	1.36719
Trial 1	1.3	Rep	M	0:05:04.304-0:05:04.570	ITI2	0.347644	8	1.30237
Trial 1	1.3	Rep	M	0:05:04.570-0:05:04.836	ITI2	0.317059	8	1.18778
Trial 1	1.3	Rep	M	0:05:04.836-0:05:05.102	ITI2	0.187225	8	0.701393
Trial 1	1.3	Rep	M	0:05:05.102-0:05:05.368	ITI2	0.276725	8	1.03668
Trial 1	1.3	Rep	M	0:05:05.368-0:05:05.634	ITI2	0.101715	8	0.381049
Trial 1	1.3	Rep	M	0:05:05.634-0:05:05.900	ITI2	0.232416	8	0.870691
Trial 1	1.3	Rep	M	0:05:05.900-0:05:06.166	ITI2	0.0728856	8	0.273049
Trial 1	1.3	Rep	M	0:05:06.166-0:05:06.432	ITI2	0.197133	8	0.738506
Trial 1	1.3	Rep	M	0:05:06.432-0:05:06.698	ITI2	0.0717358	8	0.268741
Trial 1	1.3	Rep	M	0:05:06.698-0:05:06.964	ITI2	0.275199	8	1.03096
Trial 1	1.3	Rep	M	0:05:06.964-0:05:07.230	ITI2	0.531767	8	1.99213
Trial 1	1.3	Rep	M	0:05:07.230-0:05:07.496	ITI2	0.796174	8	2.98267
Trial 1	1.3	Rep	M	0:05:07.496-0:05:07.762	ITI2	0.325748	8	1.22033
Trial 1	1.3	Rep	M	0:05:07.762-0:05:08.028	ITI2	0.246416	8	0.923136
Trial 1	1.3	Rep	M	0:05:08.028-0:05:08.294	ITI2	0.261441	8	0.979416
Trial 1	1.3	Rep	M	0:05:08.294-0:05:08.560	ITI2	0.208551	8	0.781282
Trial 1	1.3	Rep	M	0:05:08.560-0:05:08.826	ITI2	0.414245	8	1.55186
Trial 1	1.3	Rep	M	0:05:08.826-0:05:09.092	ITI2	0.186489	8	0.698633
Trial 1	1.3	Rep	M	0:05:09.092-0:05:09.358	ITI2	0.391636	8	1.46717
Trial 1	1.3	Rep	M	0:05:09.358-0:05:09.624	ITI2	0.331712	8	1.24268
Trial 1	1.3	Rep	M	0:05:09.624-0:05:09.890	ITI2	0.227292	8	0.851492
Trial 1	1.3	Rep	M	0:05:09.890-0:05:10.156	ITI2	0.074169	8	0.277854
Trial 1	1.3	Rep	M	0:05:10.156-0:05:10.422	ITI2	0.0954809	8	0.357694
Trial 1	1.3	Rep	M	0:05:10.422-0:05:10.688	ITI2	0.145243	8	0.544117
Trial 1	1.3	Rep	M	0:05:10.688-0:05:10.954	ITI2	0.0880233	8	0.329757
Trial 1	1.3	Rep	M	0:05:10.954-0:05:11.220	ITI2	0.242021	8	0.906673
Trial 1	1.3	Rep	M	0:05:11.220-0:05:11.486	ITI2	0.199065	8	0.745746
Trial 1	1.3	Rep	M	0:05:11.486-0:05:11.752	ITI2	0.357675	8	1.33994
Trial 1	1.3	Rep	M	0:05:11.752-0:05:12.018	ITI2	0.248051	8	0.929262
Trial 1	1.3	Rep	M	0:05:12.018-0:05:12.284	ITI2	0.354567	8	1.3283
Trial 1	1.3	Rep	M	0:05:12.284-0:05:12.550	ITI2	0.252651	8	0.946492
Trial 1	1.3	Rep	M	0:05:12.550-0:05:12.816	ITI2	0.150831	8	0.56505
Trial 1	1.3	Rep	M	0:05:12.816-0:05:13.082	ITI2	0.258386	8	0.967979
Trial 1	1.3	Rep	M	0:05:13.082-0:05:13.348	ITI2	0.0489124	8	0.183238
Trial 1	1.3	Rep	M	0:05:13.348-0:05:13.614	ITI2	0.133545	8	0.50029
Trial 1	1.3	Rep	M	0:05:13.614-0:05:13.880	ITI2	0.0874074	7	0.374229
Trial 1	1.3	Rep	M	0:05:13.880-0:05:14.146	ITI2	0.12535	8	0.469592
Trial 1	1.3	Rep	M	0:05:14.146-0:05:14.412	ITI2	0.105525	8	0.395321
Trial 1	1.3	Rep	M	0:05:14.412-0:05:14.678	ITI2	0.104994	8	0.393333
Trial 1	1.3	Rep	M	0:05:14.678-0:05:14.944	ITI2	0.191062	8	0.715767
Trial 1	1.3	Rep	M	0:05:14.944-0:05:15.210	ITI2	0.137155	8	0.513814
Trial 1	1.3	Rep	M	0:05:15.210-0:05:15.476	ITI2	0.0973928	8	0.364857
Trial 1	1.3	Rep	M	0:05:15.476-0:05:15.742	ITI2	0.0912806	8	0.341958
Trial 1	1.3	Rep	M	0:05:15.742-0:05:16.008	ITI2	0.172814	8	0.647402
Trial 1	1.3	Rep	M	0:05:16.008-0:05:16.274	ITI2	0.0975905	8	0.365599
Trial 1	1.3	Rep	M	0:05:16.274-0:05:16.540	ITI2	0.133107	8	0.498652
Trial 1	1.3	Rep	M	0:05:16.540-0:05:16.806	ITI2	0.102775	8	0.385018
Trial 1	1.3	Rep	M	0:05:16.806-0:05:17.072	ITI2	0.10996	8	0.411937
Trial 1	1.3	Rep	M	0:05:17.072-0:05:17.338	ITI2	0.148142	8	0.554976
Trial 1	1.3	Rep	M	0:05:17.338-0:05:17.604	ITI2	0.337908	8	1.26589
Trial 1	1.3	Rep	M	0:05:17.604-0:05:17.870	ITI2	0.284568	8	1.06606
Trial 1	1.3	Rep	M	0:05:17.870-0:05:18.136	ITI2	0.178623	8	0.669168
Trial 1	1.3	Rep	M	0:05:18.136-0:05:18.402	ITI2	0.195688	8	0.733095
Trial 1	1.3	Rep	M	0:05:18.402-0:05:18.668	ITI2	0.122061	8	0.457269
Trial 1	1.3	Rep	M	0:05:18.668-0:05:18.934	ITI2	0.0969013	8	0.363018
Trial 1	1.3	Rep	M	0:05:18.934-0:05:19.200	ITI2	0.0748602	8	0.280444
Trial 1	1.3	Rep	M	0:05:19.200-0:05:19.466	ITI2	0.0666112	8	0.249544
Trial 1	1.3	Rep	M	0:05:19.466-0:05:19.732	ITI2	0.0395285	8	0.148083
Trial 1	1.3	Rep	M	0:05:19.732-0:05:19.998	ITI2	0.0489476	8	0.183369
Trial 1	1.3	Rep	M	0:05:19.998-0:05:20.264	ITI2	0.160371	8	0.600788
Trial 1	1.3	Rep	M	0:05:20.264-0:05:20.530	ITI2	0.0578317	8	0.216652
Trial 1	1.3	Rep	M	0:05:20.530-0:05:20.796	ITI2	0.0834545	8	0.312643
Trial 1	1.3	Rep	M	0:05:20.796-0:05:21.062	ITI2	0.049394	8	0.185041
Trial 1	1.3	Rep	M	0:05:21.062-0:05:21.328	ITI2	0.0875677	8	0.328049
Trial 1	1.3	Rep	M	0:05:21.328-0:05:21.594	ITI2	0.0842533	8	0.315634
Trial 1	1.3	Rep	M	0:05:21.594-0:05:21.860	ITI2	0.0665831	8	0.249437
Trial 1	1.3	Rep	M	0:05:21.860-0:05:22.126	ITI2	0.0663379	8	0.248518
Trial 1	1.3	Rep	M	0:05:22.126-0:05:22.392	ITI2	0.10397	8	0.389497
Trial 1	1.3	Rep	M	0:05:22.392-0:05:22.658	ITI2	0.0904054	8	0.338681
Trial 1	1.3	Rep	M	0:05:22.658-0:05:22.924	ITI2	0.113918	8	0.426768
Trial 1	1.3	Rep	M	0:05:22.924-0:05:23.190	ITI2	0.0874118	8	0.327466
Trial 1	1.3	Rep	M	0:05:23.190-0:05:23.456	ITI2	0.0361302	7	0.154689
Trial 1	1.3	Rep	M	0:05:23.456-0:05:23.722	ITI2	0.0872566	8	0.326888
Trial 1	1.3	Rep	M	0:05:23.722-0:05:23.988	ITI2	0.244984	8	0.917771
Trial 1	1.3	Rep	M	0:05:23.988-0:05:24.254	ITI2	0.19229	8	0.720369
Trial 1	1.3	Rep	M	0:05:24.254-0:05:24.520	ITI2	0.189949	8	0.711594
Trial 1	1.3	Rep	M	0:05:24.520-0:05:24.786	ITI2	0.0679839	8	0.254683
Trial 1	1.3	Rep	M	0:05:24.786-0:05:25.052	ITI2	0.148076	8	0.554732
Trial 1	1.3	Rep	M	0:05:25.052-0:05:25.318	ITI2	0.209023	8	0.783053
Trial 1	1.3	Rep	M	0:05:25.318-0:05:25.584	ITI2	0.166089	8	0.62221
Trial 1	1.3	Rep	M	0:05:25.584-0:05:25.850	ITI2	0.120266	8	0.450545
Trial 1	1.3	Rep	M	0:05:25.850-0:05:26.116	ITI2	0.0652267	8	0.244356
Trial 1	1.3	Rep	M	0:05:26.116-0:05:26.382	ITI2	0.141516	8	0.530153
Trial 1	1.3	Rep	M	0:05:26.382-0:05:26.648	ITI2	0.150876	8	0.565217
Trial 1	1.3	Rep	M	0:05:26.648-0:05:26.914	ITI2	0.169027	8	0.633221
Trial 1	1.3	Rep	M	0:05:26.914-0:05:27.180	ITI2	0.193337	8	0.724285
Trial 1	1.3	Rep	M	0:05:27.180-0:05:27.446	ITI2	0.0961145	8	0.36007
Trial 1	1.3	Rep	M	0:05:27.446-0:05:27.712	ITI2	0.0943296	8	0.353381
Trial 1	1.3	Rep	M	0:05:27.712-0:05:27.978	ITI2	0.109816	8	0.411396
Trial 1	1.3	Rep	M	0:05:27.978-0:05:28.244	ITI2	0.140405	8	0.525993
Trial 1	1.3	Rep	M	0:05:28.244-0:05:28.510	ITI2	0.13261	8	0.496787
Trial 1	1.3	Rep	M	0:05:28.510-0:05:28.776	ITI2	0.126784	8	0.474963
Trial 1	1.3	Rep	M	0:05:28.776-0:05:29.042	ITI2	0.0732941	8	0.274577
Trial 1	1.3	Rep	M	0:05:29.042-0:05:29.308	ITI2	0.197701	8	0.74064
Trial 1	1.3	Rep	M	0:05:29.308-0:05:29.574	ITI2	0.0632126	8	0.236811
Trial 1	1.3	Rep	M	0:05:29.574-0:05:29.840	ITI2	0.157506	8	0.590059
Trial 1	1.3	Rep	M	0:05:29.840-0:05:30.106	ITI2	0.119207	8	0.446581
Trial 1	1.3	Rep	M	0:05:30.106-0:05:30.372	ITI2	0.0814603	8	0.305171
Trial 1	1.3	Rep	M	0:05:30.372-0:05:30.638	ITI2	0.0822891	8	0.308276
Trial 1	1.3	Rep	M	0:05:30.638-0:05:30.904	ITI2	0.13223	8	0.495366
Trial 1	1.3	Rep	M	0:05:30.904-0:05:31.170	ITI2	0.108662	8	0.407072
Trial 1	1.3	Rep	M	0:05:31.170-0:05:31.436	ITI2	0.049725	8	0.186282
Trial 1	1.3	Rep	M	0:05:31.436-0:05:31.702	ITI2	0.179205	8	0.671345
Trial 1	1.3	Rep	M	0:05:31.702-0:05:31.968	ITI2	0.118919	8	0.4455
Trial 1	1.3	Rep	M	0:05:31.968-0:05:32.234	ITI2	0.11601	8	0.434603
Trial 1	1.3	Rep	M	0:05:32.234-0:05:32.500	ITI2	0.0534435	8	0.200213
Trial 1	1.3	Rep	M	0:05:32.500-0:05:32.766	ITI2	0.0330442	7	0.141475
Trial 1	1.3	Rep	M	0:05:32.766-0:05:33.032	ITI2	0.0428199	8	0.160415
Trial 1	1.3	Rep	M	0:05:33.032-0:05:33.298	ITI2	0.0664466	8	0.248925
Trial 1	1.3	Rep	M	0:05:33.298-0:05:33.564	ITI2	0.14013	8	0.524963
Trial 1	1.3	Rep	M	0:05:33.564-0:05:33.830	ITI2	0.0498271	8	0.186666
Trial 1	1.3	Rep	M	0:05:33.830-0:05:34.096	ITI2	0.115632	8	0.433183
Trial 1	1.3	Rep	M	0:05:34.096-0:05:34.362	ITI2	0.0858639	8	0.321669
Trial 1	1.3	Rep	M	0:05:34.362-0:05:34.628	ITI2	0.120641	8	0.451949
Trial 1	1.3	Rep	M	0:05:34.628-0:05:34.894	ITI2	0.144841	8	0.542611
Trial 1	1.3	Rep	M	0:05:34.894-0:05:35.160	ITI2	0.123663	8	0.463275
Trial 1	1.3	Rep	M	0:05:35.160-0:05:35.426	ITI2	0.210885	8	0.790027
Trial 1	1.3	Rep	M	0:05:35.426-0:05:35.692	ITI2	0.141566	8	0.530345
Trial 1	1.3	Rep	M	0:05:35.692-0:05:35.958	ITI2	0.130397	8	0.488501
Trial 1	1.3	Rep	M	0:05:35.958-0:05:36.224	ITI2	0.111697	8	0.418443
Trial 1	1.3	Rep	M	0:05:36.224-0:05:36.490	ITI2	0.16869	8	0.631952
Trial 1	1.3	Rep	M	0:05:36.490-0:05:36.756	ITI2	0.0772966	8	0.289572
Trial 1	1.3	Rep	M	0:05:36.756-0:05:37.022	ITI2	0.15981	8	0.598687
Trial 1	1.3	Rep	M	0:05:37.022-0:05:37.288	ITI2	0.132613	8	0.496802
Trial 1	1.3	Rep	M	0:05:37.288-0:05:37.554	ITI2	0.143573	8	0.537857
Trial 1	1.3	Rep	M	0:05:37.554-0:05:37.820	ITI2	0.104907	8	0.39301
Trial 1	1.3	Rep	M	0:05:37.820-0:05:38.086	ITI2	0.0637948	8	0.238991
Trial 1	1.3	Rep	M	0:05:38.086-0:05:38.352	ITI2	0.313091	8	1.17292
Trial 1	1.3	Rep	M	0:05:38.352-0:05:38.618	ITI2	0.238913	8	0.895036
Trial 1	1.3	Rep	M	0:05:38.618-0:05:38.884	ITI2	0.113477	8	0.42511
Trial 1	1.3	Rep	M	0:05:38.884-0:05:39.150	ITI2	0.0634767	8	0.2378
Trial 1	1.3	Rep	M	0:05:39.150-0:05:39.416	ITI2	0.083774	8	0.313838
Trial 1	1.3	Rep	M	0:05:39.416-0:05:39.682	ITI2	0.132522	8	0.496459
Trial 1	1.3	Rep	M	0:05:39.682-0:05:39.948	ITI2	0.228502	8	0.856029
Trial 1	1.3	Rep	M	0:05:39.948-0:05:40.214	ITI2	0.185947	8	0.696605
Trial 1	1.3	Rep	M	0:05:40.214-0:05:40.480	ITI2	0.296237	8	1.10978
Trial 1	1.3	Rep	M	0:05:40.480-0:05:40.746	ITI2	0.358398	8	1.34264
Trial 1	1.3	Rep	M	0:05:40.746-0:05:41.012	ITI2	0.186476	8	0.698585
Trial 1	1.3	Rep	M	0:05:41.012-0:05:41.278	ITI2	0.288497	8	1.08079
Trial 1	1.3	Rep	M	0:05:41.278-0:05:41.544	ITI2	0.143572	8	0.537857
Trial 1	1.3	Rep	M	0:05:41.544-0:05:41.810	ITI2	0.35496	8	1.32977
Trial 1	1.3	Rep	M	0:05:41.810-0:05:42.076	ITI2	0.703045	8	2.63378
Trial 1	1.3	Rep	M	0:05:42.076-0:05:42.342	ITI2	0.446918	7	1.91344
Trial 1	1.3	Rep	M	0:05:42.342-0:05:42.608	ITI2	0.486269	8	1.82169
Trial 1	1.3	Rep	M	0:05:42.608-0:05:42.874	ITI2	0.373353	8	1.39867
Trial 1	1.3	Rep	M	0:05:42.874-0:05:43.140	ITI2	0.407939	8	1.52824
Trial 1	1.3	Rep	M	0:05:43.140-0:05:43.406	ITI2	0.199028	8	0.745612
Trial 1	1.3	Rep	M	0:05:43.406-0:05:43.672	ITI2	0.368859	8	1.38184
Trial 1	1.3	Rep	M	0:05:43.672-0:05:43.938	ITI2	0.391882	8	1.46809
Trial 1	1.3	Rep	M	0:05:43.938-0:05:44.204	ITI2	0.84011	8	3.14726
Trial 1	1.3	Rep	M	0:05:44.204-0:05:44.470	ITI2	1.10684	8	4.1465
Trial 1	1.3	Rep	M	0:05:44.470-0:05:44.736	ITI2	2.26913	8	8.50071
Trial 1	1.3	Rep	M	0:05:44.736-0:05:45.002	ITI2	1.85775	8	6.95961
Trial 1	1.3	Rep	M	0:05:45.002-0:05:45.268	ITI2	5.21273	8	19.5282
Trial 1	1.3	Rep	M	0:05:45.268-0:05:45.534	ITI2	5.16964	8	19.3666
Trial 1	1.3	Rep	M	0:05:45.534-0:05:45.800	ITI2	0.320871	8	1.20206
Trial 1	1.3	Rep	M	0:05:45.800-0:05:46.066	ITI2	0.156923	8	0.587872
Trial 1	1.3	Rep	M	0:05:46.066-0:05:46.332	ITI2	0.156923	8	0.58787
Trial 1	1.3	Rep	M	0:05:46.332-0:05:46.598	ITI2	0.156923	8	0.587872
Trial 1	1.3	Rep	M	0:05:46.598-0:05:46.864	ITI2	0.419291	8	1.57078
Trial 1	1.3	Rep	M	0:05:46.864-0:05:47.130	ITI2	1.46607	8	5.49227
Trial 1	1.3	Rep	M	0:05:47.130-0:05:47.396	ITI2	1.5721	8	5.88951
Trial 1	1.3	Rep	M	0:05:47.396-0:05:47.662	ITI2	0.809027	8	3.03081
Trial 1	1.3	Rep	M	0:05:47.662-0:05:47.928	ITI2	1.50369	8	5.63319
Trial 1	1.3	Rep	M	0:05:47.928-0:05:48.194	ITI2	1.9861	8	7.4404
Trial 1	1.3	Rep	M	0:05:48.194-0:05:48.460	ITI2	1.1467	8	4.29581
Trial 1	1.3	Rep	M	0:05:48.460-0:05:48.726	ITI2	2.32874	8	8.72407
Trial 1	1.3	Rep	M	0:05:48.726-0:05:48.992	ITI2	2.59603	8	9.72535
Trial 1	1.3	Rep	M	0:05:48.992-0:05:49.258	ITI2	0.681763	8	2.55407
Trial 1	1.3	Rep	M	0:05:49.258-0:05:49.524	ITI2	3.51637	8	13.1732
Trial 1	1.3	Rep	M	0:05:49.524-0:05:49.790	ITI2	4.39901	8	16.4798
Trial 1	1.3	Rep	M	0:05:49.790-0:05:50.056	ITI2	2.52245	8	9.44975
Trial 1	1.3	Rep	M	0:05:50.056-0:05:50.322	ITI2	0.387866	8	1.45303
Trial 1	1.3	Rep	M	0:05:50.322-0:05:50.588	ITI2	1.35252	8	5.06692
Trial 1	1.3	Rep	M	0:05:50.588-0:05:50.854	ITI2	2.28728	8	8.56869
Trial 1	1.3	Rep	M	0:05:50.854-0:05:51.120	ITI2	0.945892	8	3.54354
Trial 1	1.3	Rep	M	0:05:51.120-0:05:51.386	ITI2	0.988065	8	3.70154
Trial 1	1.3	Rep	M	0:05:51.386-0:05:51.652	ITI2	0.967637	8	3.625
Trial 1	1.3	Rep	M	0:05:51.652-0:05:51.918	ITI2	0.46088	7	1.97322
Trial 1	1.3	Rep	M	0:05:51.918-0:05:52.184	ITI2	0.384461	8	1.44028
Trial 1	1.3	Rep	M	0:05:52.184-0:05:52.450	ITI2	0.253062	8	0.948037
Trial 1	1.3	Rep	M	0:05:52.450-0:05:52.716	ITI2	0.430066	8	1.61113
Trial 1	1.3	Rep	M	0:05:52.716-0:05:52.982	ITI2	0.3083	8	1.15497
Trial 1	1.3	Rep	M	0:05:52.982-0:05:53.248	ITI2	0.396372	8	1.48491
Trial 1	1.3	Rep	M	0:05:53.248-0:05:53.514	ITI2	1.155	8	4.32691
Trial 1	1.3	Rep	M	0:05:53.514-0:05:53.780	ITI2	3.47653	8	13.0239
Trial 1	1.3	Rep	M	0:05:53.780-0:05:54.046	ITI2	3.95337	8	14.8103
Trial 1	1.3	Rep	M	0:05:54.046-0:05:54.312	ITI2	4.91972	8	18.4306
Trial 1	1.3	Rep	M	0:05:54.312-0:05:54.578	ITI2	5.12049	8	19.1826
Trial 1	1.3	Rep	M	0:05:54.578-0:05:54.844	ITI2	2.78679	8	10.44
Trial 1	1.3	Rep	M	0:05:54.844-0:05:55.110	ITI2	0.291157	8	1.09075
Trial 1	1.3	Rep	M	0:05:55.110-0:05:55.376	ITI2	0.337149	8	1.26304
Trial 1	1.3	Rep	M	0:05:55.376-0:05:55.642	ITI2	0.207633	8	0.777849
Trial 1	1.3	Rep	M	0:05:55.642-0:05:55.908	ITI2	0.284624	8	1.06627
Trial 1	1.3	Rep	M	0:05:55.908-0:05:56.174	ITI2	0.540339	8	2.02425
Trial 1	1.3	Rep	M	0:05:56.174-0:05:56.440	ITI2	0.452881	8	1.6966
Trial 1	1.3	Rep	M	0:05:56.440-0:05:56.706	ITI2	0.211073	8	0.79073
Trial 1	1.3	Rep	M	0:05:56.706-0:05:56.972	ITI2	0.245457	8	0.919542
Trial 1	1.3	Rep	M	0:05:56.972-0:05:57.238	ITI2	0.135105	8	0.506142
Trial 1	1.3	Rep	M	0:05:57.238-0:05:57.504	ITI2	1.2104	8	4.53445
Trial 1	1.3	Rep	M	0:05:57.504-0:05:57.770	ITI2	0.505685	8	1.89441
Trial 1	1.3	Rep	M	0:05:57.770-0:05:58.036	ITI2	0.217533	8	0.814931
Trial 1	1.3	Rep	M	0:05:58.036-0:05:58.302	ITI2	0.106291	8	0.398195
Trial 1	1.3	Rep	M	0:05:58.302-0:05:58.568	ITI2	0.167628	8	0.627975
Trial 1	1.3	Rep	M	0:05:58.568-0:05:58.834	ITI2	0.139359	8	0.522078
Trial 1	1.3	Rep	M	0:05:58.834-0:05:59.100	ITI2	0.0960623	8	0.359872
Trial 1	1.3	Rep	M	0:05:59.100-0:05:59.366	ITI2	0.219097	8	0.820787
Trial 1	1.3	Rep	M	0:05:59.366-0:05:59.632	ITI2	0.790442	8	2.96118
Trial 1	1.3	Rep	M	0:05:59.632-0:05:59.898	ITI2	0.448822	8	1.6814
Trial 1	1.3	Rep	M	0:05:59.898-0:06:00.164	ITI2	0.387414	8	1.45136
Trial 1	1.3	Rep	M	0:06:00.164-0:06:00.430	ITI2	0.457898	8	1.71539
Trial 1	1.3	Rep	M	0:06:00.430-0:06:00.696	ITI2	0.282783	8	1.05937
Trial 1	1.3	Rep	M	0:06:00.696-0:06:00.962	ITI2	0.141372	8	0.529614
Trial 1	1.3	Rep	M	0:06:00.962-0:06:01.228	ITI2	0.291944	8	1.09369
Trial 1	1.3	Rep	M	0:06:01.228-0:06:01.494	ITI2	0.196717	7	0.842222
Trial 1	1.3	Rep	M	0:06:01.494-0:06:01.760	ITI2	0.607067	8	2.27421
Trial 1	1.3	Rep	M	0:06:01.760-0:06:02.026	ITI2	0.132387	8	0.495953
Trial 1	1.3	Rep	M	0:06:02.026-0:06:02.292	ITI2	0.601753	8	2.25431
Trial 1	1.3	Rep	M	0:06:02.292-0:06:02.558	ITI2	0.513672	8	1.92433
Trial 1	1.3	Rep	M	0:06:02.558-0:06:02.824	ITI2	0.216292	8	0.810283
Trial 1	1.3	Rep	M	0:06:02.824-0:06:03.090	ITI2	0.207065	8	0.775717
Trial 1	1.3	Rep	M	0:06:03.090-0:06:03.356	ITI2	0.115584	8	0.433008
Trial 1	1.3	Rep	M	0:06:03.356-0:06:03.622	ITI2	0.156388	8	0.585869
Trial 1	1.3	Rep	M	0:06:03.622-0:06:03.888	ITI2	0.0699415	8	0.262017
Trial 1	1.3	Rep	M	0:06:03.888-0:06:04.154	ITI2	0.177756	8	0.665915
Trial 1	1.3	Rep	M	0:06:04.154-0:06:04.420	ITI2	0.150465	8	0.563679
Trial 1	1.3	Rep	M	0:06:04.420-0:06:04.686	ITI2	0.259648	8	0.972705
Trial 1	1.3	Rep	M	0:06:04.686-0:06:04.952	ITI2	0.513258	8	1.9228
Trial 1	1.3	Rep	M	0:06:04.952-0:06:05.218	ITI2	0.266915	8	0.999933
Trial 1	1.3	Rep	M	0:06:05.218-0:06:05.484	ITI2	0.214351	8	0.803016
Trial 1	1.3	Rep	M	0:06:05.484-0:06:05.750	ITI2	0.285061	8	1.06791
Trial 1	1.3	Rep	M	0:06:05.750-0:06:06.016	ITI2	0.324267	8	1.21478
Trial 1	1.3	Rep	M	0:06:06.016-0:06:06.282	ITI2	0.149009	8	0.558225
Trial 1	1.3	Rep	M	0:06:06.282-0:06:06.548	ITI2	0.210503	8	0.788595
Trial 1	1.3	Rep	M	0:06:06.548-0:06:06.814	ITI2	0.486077	8	1.82096
Trial 1	1.3	Rep	M	0:06:06.814-0:06:07.080	ITI2	0.572445	8	2.14452
Trial 1	1.3	Rep	M	0:06:07.080-0:06:07.346	ITI2	0.140115	8	0.524905
Trial 1	1.3	Rep	M	0:06:07.346-0:06:07.612	ITI2	0.175794	8	0.658576
Trial 1	1.3	Rep	M	0:06:07.612-0:06:07.878	ITI2	0.419518	8	1.57161
Trial 1	1.3	Rep	M	0:06:07.878-0:06:08.144	ITI2	0.250867	8	0.939807
Trial 1	1.3	Rep	M	0:06:08.144-0:06:08.410	ITI2	0.349023	8	1.30754
Trial 1	1.3	Rep	M	0:06:08.410-0:06:08.676	ITI2	0.318016	8	1.19136
Trial 1	1.3	Rep	M	0:06:08.676-0:06:08.942	ITI2	0.615641	8	2.30634
Trial 1	1.3	Rep	M	0:06:08.942-0:06:09.208	ITI2	0.344565	8	1.29082
Trial 1	1.3	Rep	M	0:06:09.208-0:06:09.474	ITI2	0.335171	8	1.25563
Trial 1	1.3	Rep	M	0:06:09.474-0:06:09.740	ITI2	0.312064	8	1.16907
Trial 1	1.3	Rep	M	0:06:09.740-0:06:10.006	ITI2	0.40082	8	1.50157
Trial 1	1.3	Rep	M	0:06:10.006-0:06:10.272	ITI2	0.355586	8	1.33212
Trial 1	1.3	Rep	M	0:06:10.272-0:06:10.538	ITI2	0.101883	8	0.381679
Trial 1	1.3	Rep	M	0:06:10.538-0:06:10.804	ITI2	0.141591	7	0.606213
Trial 1	1.3	Rep	M	0:06:10.804-0:06:11.070	ITI2	0.118549	8	0.444117
Trial 1	1.3	Rep	M	0:06:11.070-0:06:11.336	ITI2	0.23493	8	0.880105
Trial 1	1.3	Rep	M	0:06:11.336-0:06:11.602	ITI2	0.192818	8	0.722345
Trial 1	1.3	Rep	M	0:06:11.602-0:06:11.868	ITI2	0.16858	8	0.631545
Trial 1	1.3	Rep	M	0:06:11.868-0:06:12.134	ITI2	0.23094	8	0.865156
Trial 1	1.3	Rep	M	0:06:12.134-0:06:12.400	ITI2	0.133988	8	0.501951
Trial 1	1.3	Rep	M	0:06:12.400-0:06:12.666	ITI2	0.145113	8	0.543629
Trial 1	1.3	Rep	M	0:06:12.666-0:06:12.932	ITI2	0.0954939	8	0.357743
Trial 1	1.3	Rep	M	0:06:12.932-0:06:13.198	ITI2	0.135913	8	0.509166
Trial 1	1.3	Rep	M	0:06:13.198-0:06:13.464	ITI2	0.097932	8	0.366878
Trial 1	1.3	Rep	M	0:06:13.464-0:06:13.730	ITI2	0.0940671	8	0.352397
Trial 1	1.3	Rep	M	0:06:13.730-0:06:13.996	ITI2	0.100387	8	0.376074
Trial 1	1.3	Rep	M	0:06:13.996-0:06:14.262	ITI2	0.159942	8	0.59918
Trial 1	1.3	Rep	M	0:06:14.262-0:06:14.528	ITI2	0.101229	8	0.379232
Trial 1	1.3	Rep	M	0:06:14.528-0:06:14.794	ITI2	0.0920023	8	0.344664
Trial 1	1.3	Rep	M	0:06:14.794-0:06:15.060	ITI2	0.101076	8	0.378653
Trial 1	1.3	Rep	M	0:06:15.060-0:06:15.326	ITI2	0.134	8	0.501998
Trial 1	1.3	Rep	M	0:06:15.326-0:06:15.592	ITI2	0.236268	8	0.885115
Trial 1	1.3	Rep	M	0:06:15.592-0:06:15.858	ITI2	0.102598	8	0.38436
Trial 1	1.3	Rep	M	0:06:15.858-0:06:16.124	ITI2	0.144917	8	0.542894
Trial 1	1.3	Rep	M	0:06:16.124-0:06:16.390	ITI2	0.0800445	8	0.299868
Trial 1	1.3	Rep	M	0:06:16.390-0:06:16.656	ITI2	0.152646	8	0.571851
Trial 1	1.3	Rep	M	0:06:16.656-0:06:16.922	ITI2	0.0798068	8	0.298975
Trial 1	1.3	Rep	M	0:06:16.922-0:06:17.188	ITI2	0.10879	8	0.407556
Trial 1	1.3	Rep	M	0:06:17.188-0:06:17.454	ITI2	0.0963598	8	0.360987
Trial 1	1.3	Rep	M	0:06:17.454-0:06:17.720	ITI2	0.163977	8	0.614296
Trial 1	1.3	Rep	M	0:06:17.720-0:06:17.986	ITI2	0.120588	8	0.451754
Trial 1	1.3	Rep	M	0:06:17.986-0:06:18.252	ITI2	0.188217	8	0.705106
Trial 1	1.3	Rep	M	0:06:18.252-0:06:18.518	ITI2	0.262636	8	0.983899
Trial 1	1.3	Rep	M	0:06:18.518-0:06:18.784	ITI2	0.109478	8	0.410132
Trial 1	1.3	Rep	M	0:06:18.784-0:06:19.050	ITI2	0.130271	8	0.488025
Trial 1	1.3	Rep	M	0:06:19.050-0:06:19.316	ITI2	0.0660966	8	0.247616
Trial 1	1.3	Rep	M	0:06:19.316-0:06:19.582	ITI2	0.107364	8	0.402211
Trial 1	1.3	Rep	M	0:06:19.582-0:06:19.848	ITI2	0.16733	8	0.626861
Trial 1	1.3	Rep	M	0:06:19.848-0:06:20.114	ITI2	0.218463	8	0.818411
Trial 1	1.3	Rep	M	0:06:20.114-0:06:20.380	ITI2	0.0914221	7	0.391416
Trial 1	1.3	Rep	M	0:06:20.380-0:06:20.646	ITI2	0.0939652	8	0.352018
Trial 1	1.3	Rep	M	0:06:20.646-0:06:20.912	ITI2	0.186105	8	0.697194
Trial 1	1.3	Rep	M	0:06:20.912-0:06:21.178	ITI2	0.124954	8	0.468108
Trial 1	1.3	Rep	M	0:06:21.178-0:06:21.444	ITI2	0.134781	8	0.504924
Trial 1	1.3	Rep	M	0:06:21.444-0:06:21.710	ITI2	0.111848	8	0.419011
Trial 1	1.3	Rep	M	0:06:21.710-0:06:21.976	ITI2	0.119866	8	0.449053
Trial 1	1.3	Rep	M	0:06:21.976-0:06:22.242	ITI2	0.123439	8	0.462432
Trial 1	1.3	Rep	M	0:06:22.242-0:06:22.508	ITI2	0.149545	8	0.560232
Trial 1	1.3	Rep	M	0:06:22.508-0:06:22.774	ITI2	0.218878	8	0.819972
Trial 1	1.3	Rep	M	0:06:22.774-0:06:23.040	ITI2	0.34703	8	1.30006
Trial 1	1.3	Rep	M	0:06:23.040-0:06:23.306	ITI2	0.188924	8	0.707761
Trial 1	1.3	Rep	M	0:06:23.306-0:06:23.572	ITI2	0.162667	8	0.609388
Trial 1	1.3	Rep	M	0:06:23.572-0:06:23.838	ITI2	0.229698	8	0.860504
Trial 1	1.3	Rep	M	0:06:23.838-0:06:24.104	ITI2	0.181657	8	0.680536
Trial 1	1.3	Rep	M	0:06:24.104-0:06:24.370	ITI2	0.192034	8	0.719406
Trial 1	1.3	Rep	M	0:06:24.370-0:06:24.636	ITI2	0.297196	8	1.11337
Trial 1	1.3	Rep	M	0:06:24.636-0:06:24.902	ITI2	0.232037	8	0.869265
Trial 1	1.3	Rep	M	0:06:24.902-0:06:25.168	ITI2	0.139438	8	0.522366
Trial 1	1.3	Rep	M	0:06:25.168-0:06:25.434	ITI2	0.109943	8	0.411874
Trial 1	1.3	Rep	M	0:06:25.434-0:06:25.700	ITI2	0.262843	8	0.98467
Trial 1	1.3	Rep	M	0:06:25.700-0:06:25.966	ITI2	0.255482	8	0.957103
Trial 1	1.3	Rep	M	0:06:25.966-0:06:26.232	ITI2	0.203212	8	0.761288
Trial 1	1.3	Rep	M	0:06:26.232-0:06:26.498	ITI2	0.0739765	8	0.277133
Trial 1	1.3	Rep	M	0:06:26.498-0:06:26.764	ITI2	0.117306	8	0.439458
Trial 1	1.3	Rep	M	0:06:26.764-0:06:27.030	ITI2	0.219758	8	0.823269
Trial 1	1.3	Rep	M	0:06:27.030-0:06:27.296	ITI2	0.130283	8	0.488074
Trial 1	1.3	Rep	M	0:06:27.296-0:06:27.562	ITI2	0.114924	8	0.430533
Trial 1	1.3	Rep	M	0:06:27.562-0:06:27.828	ITI2	0.183566	8	0.687683
Trial 1	1.3	Rep	M	0:06:27.828-0:06:28.094	ITI2	0.187023	8	0.700635
Trial 1	1.3	Rep	M	0:06:28.094-0:06:28.360	ITI2	0.14706	8	0.550923
Trial 1	1.3	Rep	M	0:06:28.360-0:06:28.626	ITI2	0.158319	8	0.593105
Trial 1	1.3	Rep	M	0:06:28.626-0:06:28.892	ITI2	0.154238	8	0.577812
Trial 1	1.3	Rep	M	0:06:28.892-0:06:29.158	ITI2	0.182195	8	0.682547
Trial 1	1.3	Rep	M	0:06:29.158-0:06:29.424	ITI2	0.171556	8	0.642695
Trial 1	1.3	Rep	M	0:06:29.424-0:06:29.690	ITI2	0.163165	8	0.611256
Trial 1	1.3	Rep	M	0:06:29.690-0:06:29.956	ITI2	0.204541	7	0.875727
Trial 1	1.3	Rep	M	0:06:29.956-0:06:30.222	ITI2	0.0893795	8	0.334838
Trial 1	1.3	Rep	M	0:06:30.222-0:06:30.488	CS3a	0.143394	8	0.537191
Trial 1	1.3	Rep	M	0:06:30.488-0:06:30.754	CS3a	0.0884221	8	0.33125
Trial 1	1.3	Rep	M	0:06:30.754-0:06:31.020	CS3a	0.0670411	8	0.251152
Trial 1	1.3	Rep	M	0:06:31.020-0:06:31.286	CS3a	0.0285267	8	0.106868
Trial 1	1.3	Rep	M	0:06:31.286-0:06:31.552	CS3a	0.0655403	8	0.24553
Trial 1	1.3	Rep	M	0:06:31.552-0:06:31.818	CS3a	0.118153	8	0.442627
Trial 1	1.3	Rep	M	0:06:31.818-0:06:32.084	CS3a	0.150943	8	0.565466
Trial 1	1.3	Rep	M	0:06:32.084-0:06:32.350	CS3a	0.151311	8	0.566849
Trial 1	1.3	Rep	M	0:06:32.350-0:06:32.616	CS3a	0.0286924	8	0.107489
Trial 1	1.3	Rep	M	0:06:32.616-0:06:32.882	CS3a	0.1143	8	0.428194
Trial 1	1.3	Rep	M	0:06:32.882-0:06:33.148	CS3a	0.0764665	8	0.286461
Trial 1	1.3	Rep	M	0:06:33.148-0:06:33.414	CS3a	0.0480956	8	0.180177
Trial 1	1.3	Rep	M	0:06:33.414-0:06:33.680	CS3a	0.0940402	8	0.352298
Trial 1	1.3	Rep	M	0:06:33.680-0:06:33.946	CS3a	0.0669867	8	0.25095
Trial 1	1.3	Rep	M	0:06:33.946-0:06:34.212	CS3a	0.175486	8	0.65741
Trial 1	1.3	Rep	M	0:06:34.212-0:06:34.478	CS3a	0.044718	8	0.167525
Trial 1	1.3	Rep	M	0:06:34.478-0:06:34.744	CS3a	0.168272	8	0.63039
Trial 1	1.3	Rep	M	0:06:34.744-0:06:35.010	CS3a	0.10397	8	0.389502
Trial 1	1.3	Rep	M	0:06:35.010-0:06:35.276	CS3a	0.251189	8	0.941016
Trial 1	1.3	Rep	M	0:06:35.276-0:06:35.542	CS3a	0.344901	8	1.29209
Trial 1	1.3	Rep	M	0:06:35.542-0:06:35.808	CS3a	0.248881	8	0.932371
Trial 1	1.3	Rep	M	0:06:35.808-0:06:36.074	CS3a	0.18646	8	0.698529
Trial 1	1.3	Rep	M	0:06:36.074-0:06:36.340	CS3a	0.0959497	8	0.359451
Trial 1	1.3	Rep	M	0:06:36.340-0:06:36.606	CS3a	0.198944	8	0.745291
Trial 1	1.3	Rep	M	0:06:36.606-0:06:36.872	CS3a	0.0657455	8	0.2463
Trial 1	1.3	Rep	M	0:06:36.872-0:06:37.138	CS3a	0.0785625	8	0.294313
Trial 1	1.3	Rep	M	0:06:37.138-0:06:37.404	CS3a	0.0766429	8	0.287122
Trial 1	1.3	Rep	M	0:06:37.404-0:06:37.670	CS3a	0.139838	8	0.523871
Trial 1	1.3	Rep	M	0:06:37.670-0:06:37.936	CS3a	0.0503399	8	0.188585
Trial 1	1.3	Rep	M	0:06:37.936-0:06:38.202	CS3a	0.0906144	8	0.339464
Trial 1	1.3	Rep	M	0:06:38.202-0:06:38.468	CS3a	0.112089	8	0.419911
Trial 1	1.3	Rep	M	0:06:38.468-0:06:38.734	CS3a	0.0456348	8	0.170958
Trial 1	1.3	Rep	M	0:06:38.734-0:06:39.000	CS3a	0.0942128	8	0.352946
Trial 1	1.3	Rep	M	0:06:39.000-0:06:39.266	CS3a	0.0730524	8	0.273671
Trial 1	1.3	Rep	M	0:06:39.266-0:06:39.532	CS3a	0.1352	7	0.578846
Trial 1	1.3	Rep	M	0:06:39.532-0:06:39.798	CS3a	0.0313383	8	0.117402
Trial 1	1.3	Rep	M	0:06:39.798-0:06:40.064	CS3a	0.109202	8	0.409097
Trial 1	1.3	Rep	M	0:06:40.064-0:06:40.330	CS3b	0.174171	8	0.652491
Trial 1	1.3	Rep	M	0:06:40.330-0:06:40.596	CS3b	0.238381	8	0.893032
Trial 1	1.3	Rep	M	0:06:40.596-0:06:40.862	CS3b	0.226472	8	0.848414
Trial 1	1.3	Rep	M	0:06:40.862-0:06:41.128	CS3b	0.177064	8	0.663326
Trial 1	1.3	Rep	M	0:06:41.128-0:06:41.394	CS3b	0.140598	8	0.526716
Trial 1	1.3	Rep	M	0:06:41.394-0:06:41.660	CS3b	0.15451	8	0.578833
Trial 1	1.3	Rep	M	0:06:41.660-0:06:41.926	CS3b	0.127822	8	0.478851
Trial 1	1.3	Rep	M	0:06:41.926-0:06:42.192	CS3b	0.0876655	8	0.328416
Trial 1	1.3	Rep	M	0:06:42.192-0:06:42.458	CS3b	0.156801	8	0.587419
Trial 1	1.3	Rep	M	0:06:42.458-0:06:42.724	CS3b	0.0585057	8	0.219177
Trial 1	1.3	Rep	M	0:06:42.724-0:06:42.990	CS3b	0.0526993	8	0.197426
Trial 1	1.3	Rep	M	0:06:42.990-0:06:43.256	CS3b	0.112683	8	0.422139
Trial 1	1.3	Rep	M	0:06:43.256-0:06:43.522	CS3b	0.0887673	8	0.332545
Trial 1	1.3	Rep	M	0:06:43.522-0:06:43.788	CS3b	0.130974	8	0.49066
Trial 1	1.3	Rep	M	0:06:43.788-0:06:44.054	CS3b	0.0720791	8	0.270026
Trial 1	1.3	Rep	M	0:06:44.054-0:06:44.320	CS3b	0.210811	8	0.789755
Trial 1	1.3	Rep	M	0:06:44.320-0:06:44.586	CS3b	0.14097	8	0.528108
Trial 1	1.3	Rep	M	0:06:44.586-0:06:44.852	CS3b	0.12334	8	0.462063
Trial 1	1.3	Rep	M	0:06:44.852-0:06:45.118	CS3b	0.0506657	8	0.189807
Trial 1	1.3	Rep	M	0:06:45.118-0:06:45.384	CS3b	0.0779823	8	0.292142
Trial 1	1.3	Rep	M	0:06:45.384-0:06:45.650	CS3b	0.0926916	8	0.347246
Trial 1	1.3	Rep	M	0:06:45.650-0:06:45.916	CS3b	0.06454	8	0.241782
Trial 1	1.3	Rep	M	0:06:45.916-0:06:46.182	CS3b	0.133081	8	0.498553
Trial 1	1.3	Rep	M	0:06:46.182-0:06:46.448	CS3b	0.112708	8	0.422232
Trial 1	1.3	Rep	M	0:06:46.448-0:06:46.714	CS3b	0.345679	8	1.295
Trial 1	1.3	Rep	M	0:06:46.714-0:06:46.980	CS3b	0.285503	8	1.06956
Trial 1	1.3	Rep	M	0:06:46.980-0:06:47.246	CS3b	0.21748	8	0.814734
Trial 1	1.3	Rep	M	0:06:47.246-0:06:47.512	CS3b	0.103557	8	0.387948
Trial 1	1.3	Rep	M	0:06:47.512-0:06:47.778	CS3b	0.0752057	8	0.28174
Trial 1	1.3	Rep	M	0:06:47.778-0:06:48.044	CS3b	0.198649	8	0.744186
Trial 1	1.3	Rep	M	0:06:48.044-0:06:48.310	CS3b	0.1077	8	0.403477
Trial 1	1.3	Rep	M	0:06:48.310-0:06:48.576	CS3b	0.198731	8	0.744493
Trial 1	1.3	Rep	M	0:06:48.576-0:06:48.842	CS3b	0.0552319	7	0.236471
Trial 1	1.3	Rep	M	0:06:48.842-0:06:49.108	CS3b	0.167345	8	0.62691
Trial 1	1.3	Rep	M	0:06:49.108-0:06:49.374	CS3b	0.120559	8	0.451646
Trial 1	1.3	Rep	M	0:06:49.374-0:06:49.640	CS3b	0.132618	8	0.496819
Trial 1	1.3	Rep	M	0:06:49.640-0:06:49.906	CS3b	0.0381557	8	0.142941
Trial 1	1.3	Rep	M	0:06:49.906-0:06:50.172	CS3b	0.0821657	8	0.307813
Trial 1	1.3	Rep	M	0:06:50.172-0:06:50.438	IT3	0.198696	8	0.744369
Trial 1	1.3	Rep	M	0:06:50.438-0:06:50.704	IT3	0.179114	8	0.671007
Trial 1	1.3	Rep	M	0:06:50.704-0:06:50.970	IT3	0.116988	8	0.438264
Trial 1	1.3	Rep	M	0:06:50.970-0:06:51.236	IT3	0.139649	8	0.523158
Trial 1	1.3	Rep	M	0:06:51.236-0:06:51.502	IT3	0.186367	8	0.698177
Trial 1	1.3	Rep	M	0:06:51.502-0:06:51.768	IT3	0.0693192	8	0.259686
Trial 1	1.3	Rep	M	0:06:51.768-0:06:52.034	IT3	0.0825257	8	0.309164
Trial 1	1.3	Rep	M	0:06:52.034-0:06:52.300	IT3	0.0559582	8	0.209634
Trial 1	1.3	Rep	M	0:06:52.300-0:06:52.566	IT3	0.044182	8	0.165518
Trial 1	1.3	Rep	M	0:06:52.566-0:06:52.832	IT3	0.111047	8	0.416011
Trial 1	1.3	Rep	M	0:06:52.832-0:06:53.098	IT3	0.108989	8	0.408299
Trial 1	1.3	Rep	M	0:06:53.098-0:06:53.364	IT3	0.203755	8	0.763319
Trial 1	1.3	Rep	M	0:06:53.364-0:06:53.630	IT3	0.0822362	8	0.308076
Trial 1	1.3	Rep	M	0:06:53.630-0:06:53.896	IT3	0.147459	8	0.552414
Trial 1	1.3	Rep	M	0:06:53.896-0:06:54.162	IT3	0.0613083	8	0.229675
Trial 1	1.3	Rep	M	0:06:54.162-0:06:54.428	IT3	0.141184	8	0.528908
Trial 1	1.3	Rep	M	0:06:54.428-0:06:54.694	IT3	0.130184	8	0.4877
Trial 1	1.3	Rep	M	0:06:54.694-0:06:54.960	IT3	0.0601672	8	0.2254
Trial 1	1.3	Rep	M	0:06:54.960-0:06:55.226	IT3	0.136996	8	0.513219
Trial 1	1.3	Rep	M	0:06:55.226-0:06:55.492	IT3	0.0416585	8	0.156062
Trial 1	1.3	Rep	M	0:06:55.492-0:06:55.758	IT3	0.109224	8	0.409179
Trial 1	1.3	Rep	M	0:06:55.758-0:06:56.024	IT3	0.109245	8	0.409257
Trial 1	1.3	Rep	M	0:06:56.024-0:06:56.290	IT3	0.255004	8	0.955311
Trial 1	1.3	Rep	M	0:06:56.290-0:06:56.556	IT3	0.0235886	8	0.0883685
Trial 1	1.3	Rep	M	0:06:56.556-0:06:56.822	IT3	0.114122	8	0.427528
Trial 1	1.3	Rep	M	0:06:56.822-0:06:57.088	IT3	0.187839	8	0.703688
Trial 1	1.3	Rep	M	0:06:57.088-0:06:57.354	IT3	0.0730862	8	0.273798
Trial 1	1.3	Rep	M	0:06:57.354-0:06:57.620	IT3	0.128459	8	0.481237
Trial 1	1.3	Rep	M	0:06:57.620-0:06:57.886	IT3	0.0576853	8	0.216104
Trial 1	1.3	Rep	M	0:06:57.886-0:06:58.152	IT3	0.155448	8	0.582351
Trial 1	1.3	Rep	M	0:06:58.152-0:06:58.418	IT3	0.193727	7	0.829424
Trial 1	1.3	Rep	M	0:06:58.418-0:06:58.684	IT3	0.405448	8	1.51892
Trial 1	1.3	Rep	M	0:06:58.684-0:06:58.950	IT3	0.342909	8	1.28462
Trial 1	1.3	Rep	M	0:06:58.950-0:06:59.216	IT3	0.125485	8	0.470098
Trial 1	1.3	Rep	M	0:06:59.216-0:06:59.482	IT3	0.236952	8	0.88768
Trial 1	1.3	Rep	M	0:06:59.482-0:06:59.748	IT3	0.118312	8	0.443228
Trial 1	1.3	Rep	M	0:06:59.748-0:07:00.014	IT3	0.105515	8	0.395283
Trial 1	1.3	Rep	M	0:07:00.014-0:07:00.280	IT3	0.222657	8	0.834132
Trial 1	1.3	Rep	M	0:07:00.280-0:07:00.546	IT3	0.270698	8	1.0141
Trial 1	1.3	Rep	M	0:07:00.546-0:07:00.812	IT3	0.222799	8	0.834662
Trial 1	1.3	Rep	M	0:07:00.812-0:07:01.078	IT3	0.207159	8	0.776065
Trial 1	1.3	Rep	M	0:07:01.078-0:07:01.344	IT3	0.241284	8	0.903913
Trial 1	1.3	Rep	M	0:07:01.344-0:07:01.610	IT3	0.165473	8	0.619904
Trial 1	1.3	Rep	M	0:07:01.610-0:07:01.876	IT3	0.133438	8	0.499892
Trial 1	1.3	Rep	M	0:07:01.876-0:07:02.142	IT3	0.0508237	8	0.190398
Trial 1	1.3	Rep	M	0:07:02.142-0:07:02.408	IT3	0.187044	8	0.700717
Trial 1	1.3	Rep	M	0:07:02.408-0:07:02.674	IT3	0.0233684	8	0.0875437
Trial 1	1.3	Rep	M	0:07:02.674-0:07:02.940	IT3	0.193785	8	0.725967
Trial 1	1.3	Rep	M	0:07:02.940-0:07:03.206	IT3	0.0549761	8	0.205954
Trial 1	1.3	Rep	M	0:07:03.206-0:07:03.472	IT3	0.126643	8	0.474436
Trial 1	1.3	Rep	M	0:07:03.472-0:07:03.738	IT3	0.123422	8	0.462368
Trial 1	1.3	Rep	M	0:07:03.738-0:07:04.004	IT3	0.0549019	8	0.205677
Trial 1	1.3	Rep	M	0:07:04.004-0:07:04.270	IT3	0.198118	8	0.742197
Trial 1	1.3	Rep	M	0:07:04.270-0:07:04.536	IT3	0.0701143	8	0.262665
Trial 1	1.3	Rep	M	0:07:04.536-0:07:04.802	IT3	0.157739	8	0.590927
Trial 1	1.3	Rep	M	0:07:04.802-0:07:05.068	IT3	0.112731	8	0.422318
Trial 1	1.3	Rep	M	0:07:05.068-0:07:05.334	IT3	0.556511	8	2.08484
Trial 1	1.3	Rep	M	0:07:05.334-0:07:05.600	IT3	0.30714	8	1.15062
Trial 1	1.3	Rep	M	0:07:05.600-0:07:05.866	IT3	0.271762	8	1.01809
Trial 1	1.3	Rep	M	0:07:05.866-0:07:06.132	IT3	0.248522	8	0.931027
Trial 1	1.3	Rep	M	0:07:06.132-0:07:06.398	IT3	0.222061	8	0.831897
Trial 1	1.3	Rep	M	0:07:06.398-0:07:06.664	IT3	0.149832	8	0.561309
Trial 1	1.3	Rep	M	0:07:06.664-0:07:06.930	IT3	0.235428	8	0.881973
Trial 1	1.3	Rep	M	0:07:06.930-0:07:07.196	IT3	0.160693	8	0.601996
Trial 1	1.3	Rep	M	0:07:07.196-0:07:07.462	IT3	0.100154	8	0.375203
Trial 1	1.3	Rep	M	0:07:07.462-0:07:07.728	IT3	0.118717	8	0.444742
Trial 1	1.3	Rep	M	0:07:07.728-0:07:07.994	IT3	0.204241	7	0.874445
Trial 1	1.3	Rep	M	0:07:07.994-0:07:08.260	IT3	0.306669	8	1.14886
Trial 1	1.3	Rep	M	0:07:08.260-0:07:08.526	IT3	0.3836	8	1.43706
Trial 1	1.3	Rep	M	0:07:08.526-0:07:08.792	IT3	0.293748	8	1.10045
Trial 1	1.3	Rep	M	0:07:08.792-0:07:09.058	IT3	0.426946	8	1.59945
Trial 1	1.3	Rep	M	0:07:09.058-0:07:09.324	IT3	0.315926	8	1.18354
Trial 1	1.3	Rep	M	0:07:09.324-0:07:09.590	IT3	0.365967	8	1.37101
Trial 1	1.3	Rep	M	0:07:09.590-0:07:09.856	IT3	0.19474	8	0.729547
Trial 1	1.3	Rep	M	0:07:09.856-0:07:10.122	IT3	0.210057	8	0.786924
Trial 1	1.3	Rep	M	0:07:10.122-0:07:10.388	IT3	0.138235	8	0.517862
Trial 1	1.3	Rep	M	0:07:10.388-0:07:10.654	IT3	0.114522	8	0.429027
Trial 1	1.3	Rep	M	0:07:10.654-0:07:10.920	IT3	0.221157	8	0.82851
Trial 1	1.3	Rep	M	0:07:10.920-0:07:11.186	IT3	0.0965165	8	0.361574
Trial 1	1.3	Rep	M	0:07:11.186-0:07:11.452	IT3	0.142747	8	0.534768
Trial 1	1.3	Rep	M	0:07:11.452-0:07:11.718	IT3	0.0580293	8	0.217394
Trial 1	1.3	Rep	M	0:07:11.718-0:07:11.984	IT3	0.117771	8	0.441201
Trial 1	1.3	Rep	M	0:07:11.984-0:07:12.250	IT3	0.143497	8	0.537579
Trial 1	1.3	Rep	M	0:07:12.250-0:07:12.516	IT3	0.119613	8	0.448099
Trial 1	1.3	Rep	M	0:07:12.516-0:07:12.782	IT3	0.0773126	8	0.28963
Trial 1	1.3	Rep	M	0:07:12.782-0:07:13.048	IT3	0.217144	8	0.813482
Trial 1	1.3	Rep	M	0:07:13.048-0:07:13.314	IT3	0.103599	8	0.388105
Trial 1	1.3	Rep	M	0:07:13.314-0:07:13.580	IT3	0.112044	8	0.419745
Trial 1	1.3	Rep	M	0:07:13.580-0:07:13.846	IT3	0.330994	8	1.23998
Trial 1	1.3	Rep	M	0:07:13.846-0:07:14.112	IT3	0.342443	8	1.28288
Trial 1	1.3	Rep	M	0:07:14.112-0:07:14.378	IT3	0.479575	8	1.7966
Trial 1	1.3	Rep	M	0:07:14.378-0:07:14.644	IT3	0.171757	8	0.643442
Trial 1	1.3	Rep	M	0:07:14.644-0:07:14.910	IT3	0.0564879	8	0.211619
Trial 1	1.3	Rep	M	0:07:14.910-0:07:15.176	IT3	0.04464	8	0.167234
Trial 1	1.3	Rep	M	0:07:15.176-0:07:15.442	IT3	0.0265294	8	0.0993859
Trial 1	1.3	Rep	M	0:07:15.442-0:07:15.708	IT3	0.0575271	8	0.215511
Trial 1	1.3	Rep	M	0:07:15.708-0:07:15.974	IT3	0.0536105	8	0.20084
Trial 1	1.3	Rep	M	0:07:15.974-0:07:16.240	IT3	0.384519	8	1.4405
Trial 1	1.3	Rep	M	0:07:16.240-0:07:16.506	IT3	0.679485	8	2.54551
Trial 1	1.3	Rep	M	0:07:16.506-0:07:16.772	IT3	0.241825	8	0.905935
Trial 1	1.3	Rep	M	0:07:16.772-0:07:17.038	IT3	0.159143	8	0.596191
Trial 1	1.3	Rep	M	0:07:17.038-0:07:17.304	IT3	0.20041	8	0.75078
Trial 1	1.3	Rep	M	0:07:17.304-0:07:17.570	IT3	0.185969	7	0.796214
Trial 1	1.3	Rep	M	0:07:17.570-0:07:17.836	IT3	0.15875	8	0.59472
Trial 1	1.3	Rep	M	0:07:17.836-0:07:18.102	IT3	0.188345	8	0.705593
Trial 1	1.3	Rep	M	0:07:18.102-0:07:18.368	IT3	0.161922	8	0.606598
Trial 1	1.3	Rep	M	0:07:18.368-0:07:18.634	IT3	0.26036	8	0.975374
Trial 1	1.3	Rep	M	0:07:18.634-0:07:18.900	IT3	0.0834449	8	0.312605
Trial 1	1.3	Rep	M	0:07:18.900-0:07:19.166	IT3	0.434259	8	1.62685
Trial 1	1.3	Rep	M	0:07:19.166-0:07:19.432	IT3	0.439192	8	1.64532
Trial 1	1.3	Rep	M	0:07:19.432-0:07:19.698	IT3	0.301444	8	1.12929
Trial 1	1.3	Rep	M	0:07:19.698-0:07:19.964	IT3	0.157863	8	0.591391
Trial 1	1.3	Rep	M	0:07:19.964-0:07:20.230	IT3	0.0902431	8	0.338073
Trial 1	1.3	Rep	M	0:07:20.230-0:07:20.496	IT3	0.258191	8	0.967258
Trial 1	1.3	Rep	M	0:07:20.496-0:07:20.762	IT3	0.216493	8	0.811042
Trial 1	1.3	Rep	M	0:07:20.762-0:07:21.028	IT3	0.252061	8	0.94428
Trial 1	1.3	Rep	M	0:07:21.028-0:07:21.294	IT3	0.0376721	8	0.141129
Trial 1	1.3	Rep	M	0:07:21.294-0:07:21.560	IT3	0.218299	8	0.817801
Trial 1	1.3	Rep	M	0:07:21.560-0:07:21.826	IT3	0.237868	8	0.891118
Trial 1	1.3	Rep	M	0:07:21.826-0:07:22.092	IT3	0.196414	8	0.735813
Trial 1	1.3	Rep	M	0:07:22.092-0:07:22.358	IT3	0.0941947	8	0.352877
Trial 1	1.3	Rep	M	0:07:22.358-0:07:22.624	IT3	0.0787325	8	0.294952
Trial 1	1.3	Rep	M	0:07:22.624-0:07:22.890	IT3	0.278392	8	1.04292
Trial 1	1.3	Rep	M	0:07:22.890-0:07:23.156	IT3	0.0693464	8	0.259789
Trial 1	1.3	Rep	M	0:07:23.156-0:07:23.422	IT3	0.0751952	8	0.281699
Trial 1	1.3	Rep	M	0:07:23.422-0:07:23.688	IT3	0.050933	8	0.190809
Trial 1	1.3	Rep	M	0:07:23.688-0:07:23.954	IT3	0.13557	8	0.50788
Trial 1	1.3	Rep	M	0:07:23.954-0:07:24.220	IT3	0.256712	8	0.961712
Trial 1	1.3	Rep	M	0:07:24.220-0:07:24.486	IT3	0.124657	8	0.466999
Trial 1	1.3	Rep	M	0:07:24.486-0:07:24.752	IT3	0.0658306	8	0.246617
Trial 1	1.3	Rep	M	0:07:24.752-0:07:25.018	IT3	0.0478446	8	0.179238
Trial 1	1.3	Rep	M	0:07:25.018-0:07:25.284	IT3	0.122079	8	0.45734
Trial 1	1.3	Rep	M	0:07:25.284-0:07:25.550	IT3	0.0833323	8	0.312184
Trial 1	1.3	Rep	M	0:07:25.550-0:07:25.816	IT3	0.304973	8	1.14252
Trial 1	1.3	Rep	M	0:07:25.816-0:07:26.082	IT3	0.599117	8	2.24444
Trial 1	1.3	Rep	M	0:07:26.082-0:07:26.348	IT3	0.679617	8	2.54603
Trial 1	1.3	Rep	M	0:07:26.348-0:07:26.614	IT3	0.108322	8	0.4058
Trial 1	1.3	Rep	M	0:07:26.614-0:07:26.880	IT3	0.815036	7	3.48953
Trial 1	1.3	Rep	M	0:07:26.880-0:07:27.146	IT3	0.628536	8	2.35465
Trial 1	1.3	Rep	M	0:07:27.146-0:07:27.412	IT3	0.75434	8	2.82595
Trial 1	1.3	Rep	M	0:07:27.412-0:07:27.678	IT3	0.771176	8	2.889
Trial 1	1.3	Rep	M	0:07:27.678-0:07:27.944	IT3	0.420594	8	1.57566
Trial 1	1.3	Rep	M	0:07:27.944-0:07:28.210	IT3	0.459071	8	1.7198
Trial 1	1.3	Rep	M	0:07:28.210-0:07:28.476	IT3	1.28862	8	4.82746
Trial 1	1.3	Rep	M	0:07:28.476-0:07:28.742	IT3	1.05983	8	3.97042
Trial 1	1.3	Rep	M	0:07:28.742-0:07:29.008	IT3	0.701142	8	2.62667
Trial 1	1.3	Rep	M	0:07:29.008-0:07:29.274	IT3	0.217119	8	0.813384
Trial 1	1.3	Rep	M	0:07:29.274-0:07:29.540	IT3	0.390673	8	1.46356
Trial 1	1.3	Rep	M	0:07:29.540-0:07:29.806	IT3	0.562799	8	2.10839
Trial 1	1.3	Rep	M	0:07:29.806-0:07:30.072	IT3	0.884343	8	3.31296
Trial 1	1.3	Rep	M	0:07:30.072-0:07:30.338	IT3	1.04626	8	3.91954
Trial 1	1.3	Rep	M	0:07:30.338-0:07:30.604	IT3	1.44343	8	5.40744
Trial 1	1.3	Rep	M	0:07:30.604-0:07:30.870	IT3	0.917982	8	3.43898
Trial 1	1.3	Rep	M	0:07:30.870-0:07:31.136	IT3	0.314128	8	1.1768
Trial 1	1.3	Rep	M	0:07:31.136-0:07:31.402	IT3	0.279385	8	1.04665
Trial 1	1.3	Rep	M	0:07:31.402-0:07:31.668	IT3	0.126202	8	0.472782
Trial 1	1.3	Rep	M	0:07:31.668-0:07:31.934	IT3	0.120667	8	0.452052
Trial 1	1.3	Rep	M	0:07:31.934-0:07:32.200	IT3	0.0961473	8	0.360192
Trial 1	1.3	Rep	M	0:07:32.200-0:07:32.466	IT3	0.247797	8	0.928311
Trial 1	1.3	Rep	M	0:07:32.466-0:07:32.732	IT3	0.15869	8	0.594493
Trial 1	1.3	Rep	M	0:07:32.732-0:07:32.998	IT3	0.208331	8	0.780457
Trial 1	1.3	Rep	M	0:07:32.998-0:07:33.264	IT3	0.104367	8	0.390986
Trial 1	1.3	Rep	M	0:07:33.264-0:07:33.530	IT3	0.176745	8	0.662127
Trial 1	1.3	Rep	M	0:07:33.530-0:07:33.796	IT3	0.117045	8	0.438479
Trial 1	1.3	Rep	M	0:07:33.796-0:07:34.062	IT3	0.282084	8	1.05676
Trial 1	1.3	Rep	M	0:07:34.062-0:07:34.328	IT3	0.173819	8	0.651168
Trial 1	1.3	Rep	M	0:07:34.328-0:07:34.594	IT3	0.494975	8	1.85432
Trial 1	1.3	Rep	M	0:07:34.594-0:07:34.860	IT3	0.366415	8	1.37268
Trial 1	1.3	Rep	M	0:07:34.860-0:07:35.126	IT3	0.0820105	8	0.307232
Trial 1	1.3	Rep	M	0:07:35.126-0:07:35.392	IT3	0.169434	8	0.634745
Trial 1	1.3	Rep	M	0:07:35.392-0:07:35.658	IT3	0.19447	8	0.728532
Trial 1	1.3	Rep	M	0:07:35.658-0:07:35.924	IT3	0.287602	8	1.07744
Trial 1	1.3	Rep	M	0:07:35.924-0:07:36.190	IT3	0.481888	8	1.80527
Trial 1	1.3	Rep	M	0:07:36.190-0:07:36.456	IT3	0.305697	7	1.30882
Trial 1	1.3	Rep	M	0:07:36.456-0:07:36.722	IT3	0.291031	8	1.09028
Trial 1	1.3	Rep	M	0:07:36.722-0:07:36.988	IT3	0.367847	8	1.37805
Trial 1	1.3	Rep	M	0:07:36.988-0:07:37.254	IT3	0.0754044	8	0.282484
Trial 1	1.3	Rep	M	0:07:37.254-0:07:37.520	IT3	0.201636	8	0.755379
Trial 1	1.3	Rep	M	0:07:37.520-0:07:37.786	IT3	0.172068	8	0.644607
Trial 1	1.3	Rep	M	0:07:37.786-0:07:38.052	IT3	0.371931	8	1.39335
Trial 1	1.3	Rep	M	0:07:38.052-0:07:38.318	IT3	0.451698	8	1.69216
Trial 1	1.3	Rep	M	0:07:38.318-0:07:38.584	IT3	0.374366	8	1.40247
Trial 1	1.3	Rep	M	0:07:38.584-0:07:38.850	IT3	0.236209	8	0.884903
Trial 1	1.3	Rep	M	0:07:38.850-0:07:39.116	IT3	0.224622	8	0.841488
Trial 1	1.3	Rep	M	0:07:39.116-0:07:39.382	IT3	0.0477753	8	0.17898
Trial 1	1.3	Rep	M	0:07:39.382-0:07:39.648	IT3	0.112599	8	0.42182
Trial 1	1.3	Rep	M	0:07:39.648-0:07:39.914	IT3	0.20224	8	0.757637
Trial 1	1.3	Rep	M	0:07:39.914-0:07:40.180	IT3	0.308742	8	1.15663
Trial 1	1.3	Rep	M	0:07:40.180-0:07:40.446	IT3	0.186279	8	0.697847
Trial 1	1.3	Rep	M	0:07:40.446-0:07:40.712	IT3	0.197425	8	0.739605
Trial 1	1.3	Rep	M	0:07:40.712-0:07:40.978	IT3	0.172948	8	0.647908
Trial 1	1.3	Rep	M	0:07:40.978-0:07:41.244	IT3	0.149054	8	0.558391
Trial 1	1.3	Rep	M	0:07:41.244-0:07:41.510	IT3	0.238246	8	0.892532
Trial 1	1.3	Rep	M	0:07:41.510-0:07:41.776	IT3	0.115573	8	0.432964
Trial 1	1.3	Rep	M	0:07:41.776-0:07:42.042	IT3	0.140369	8	0.525859
Trial 1	1.3	Rep	M	0:07:42.042-0:07:42.308	IT3	0.137988	8	0.516936
Trial 1	1.3	Rep	M	0:07:42.308-0:07:42.574	IT3	0.124402	8	0.466037
Trial 1	1.3	Rep	M	0:07:42.574-0:07:42.840	IT3	0.0586829	8	0.219843
Trial 1	1.3	Rep	M	0:07:42.840-0:07:43.106	IT3	0.0525888	8	0.197009
Trial 1	1.3	Rep	M	0:07:43.106-0:07:43.372	IT3	0.074994	8	0.280947
Trial 1	1.3	Rep	M	0:07:43.372-0:07:43.638	IT3	0.0785786	8	0.294375
Trial 1	1.3	Rep	M	0:07:43.638-0:07:43.904	IT3	0.19957	8	0.747637
Trial 1	1.3	Rep	M	0:07:43.904-0:07:44.170	IT3	0.104757	8	0.392445
Trial 1	1.3	Rep	M	0:07:44.170-0:07:44.436	IT3	0.188231	8	0.705161
Trial 1	1.3	Rep	M	0:07:44.436-0:07:44.702	IT3	0.0399258	8	0.149573
Trial 1	1.3	Rep	M	0:07:44.702-0:07:44.968	IT3	0.0956781	8	0.358433
Trial 1	1.3	Rep	M	0:07:44.968-0:07:45.234	IT3	0.062186	8	0.232964
Trial 1	1.3	Rep	M	0:07:45.234-0:07:45.500	IT3	0.0791208	8	0.296407
Trial 1	1.3	Rep	M	0:07:45.500-0:07:45.766	IT3	0.0724204	8	0.271304
Trial 1	1.3	Rep	M	0:07:45.766-0:07:46.032	IT3	0.0480591	7	0.205761
Trial 1	1.3	Rep	M	0:07:46.032-0:07:46.298	IT3	0.0620689	8	0.232525
Trial 1	1.3	Rep	M	0:07:46.298-0:07:46.564	IT3	0.0977024	8	0.366016
Trial 1	1.3	Rep	M	0:07:46.564-0:07:46.830	IT3	0.185826	8	0.69615
Trial 1	1.3	Rep	M	0:07:46.830-0:07:47.096	IT3	0.0991969	8	0.37162
Trial 1	1.3	Rep	M	0:07:47.096-0:07:47.362	IT3	0.154042	8	0.577082
Trial 1	1.3	Rep	M	0:07:47.362-0:07:47.628	IT3	0.0938702	8	0.351663
Trial 1	1.3	Rep	M	0:07:47.628-0:07:47.894	IT3	0.104565	8	0.391726
Trial 1	1.3	Rep	M	0:07:47.894-0:07:48.160	IT3	0.0885754	8	0.331826
Trial 1	1.3	Rep	M	0:07:48.160-0:07:48.426	IT3	0.0833116	8	0.312104
Trial 1	1.3	Rep	M	0:07:48.426-0:07:48.692	IT3	0.084548	8	0.316736
Trial 1	1.3	Rep	M	0:07:48.692-0:07:48.958	IT3	0.0216306	8	0.0810336
Trial 1	1.3	Rep	M	0:07:48.958-0:07:49.224	IT3	0.0631422	8	0.236547
Trial 1	1.3	Rep	M	0:07:49.224-0:07:49.490	IT3	0.121987	8	0.456994
Trial 1	1.3	Rep	M	0:07:49.490-0:07:49.756	IT3	0.214519	8	0.803641
Trial 1	1.3	Rep	M	0:07:49.756-0:07:50.022	IT3	0.0782675	8	0.29321
Trial 1	1.3	Rep	M	0:07:50.022-0:07:50.288	IT3	0.1266	8	0.474277
Trial 1	1.3	Rep	M	0:07:50.288-0:07:50.554	IT3	0.139032	8	0.520845
Trial 1	1.3	Rep	M	0:07:50.554-0:07:50.820	IT3	0.108284	8	0.405656
Trial 1	1.3	Rep	M	0:07:50.820-0:07:51.086	IT3	0.122084	8	0.457357
Trial 1	1.3	Rep	M	0:07:51.086-0:07:51.352	IT3	0.0964536	8	0.361339
Trial 1	1.3	Rep	M	0:07:51.352-0:07:51.618	IT3	0.121517	8	0.455237
Trial 1	1.3	Rep	M	0:07:51.618-0:07:51.884	IT3	0.13948	8	0.522527
Trial 1	1.3	Rep	M	0:07:51.884-0:07:52.150	IT3	0.168846	8	0.632536
Trial 1	1.3	Rep	M	0:07:52.150-0:07:52.416	IT3	0.116423	8	0.436149
Trial 1	1.3	Rep	M	0:07:52.416-0:07:52.682	IT3	0.261353	8	0.979093
Trial 1	1.3	Rep	M	0:07:52.682-0:07:52.948	IT3	0.214966	8	0.80532
Trial 1	1.3	Rep	M	0:07:52.948-0:07:53.214	IT3	0.416116	8	1.55887
Trial 1	1.3	Rep	M	0:07:53.214-0:07:53.480	IT3	0.148074	8	0.554719
Trial 1	1.3	Rep	M	0:07:53.480-0:07:53.746	IT3	0.082093	8	0.307541
Trial 1	1.3	Rep	M	0:07:53.746-0:07:54.012	IT3	0.0907512	8	0.339976
Trial 1	1.3	Rep	M	0:07:54.012-0:07:54.278	IT3	0.0731021	8	0.273859
Trial 1	1.3	Rep	M	0:07:54.278-0:07:54.544	IT3	0.0520545	8	0.195009
Trial 1	1.3	Rep	M	0:07:54.544-0:07:54.810	IT3	0.0501426	8	0.187846
Trial 1	1.3	Rep	M	0:07:54.810-0:07:55.076	IT3	0.0466098	8	0.174612
Trial 1	1.3	Rep	M	0:07:55.076-0:07:55.342	IT3	0.0999356	7	0.427867
Trial 1	1.3	Rep	M	0:07:55.342-0:07:55.608	IT3	0.0590976	8	0.221395
Trial 1	1.3	Rep	M	0:07:55.608-0:07:55.874	IT3	0.114043	8	0.427239
Trial 1	1.3	Rep	M	0:07:55.874-0:07:56.140	IT3	0.0682732	8	0.255768
Trial 1	1.3	Rep	M	0:07:56.140-0:07:56.406	IT3	0.0556003	8	0.208293
Trial 1	1.3	Rep	M	0:07:56.406-0:07:56.672	IT3	0.0802381	8	0.30059
Trial 1	1.3	Rep	M	0:07:56.672-0:07:56.938	IT3	0.141043	8	0.528383
Trial 1	1.3	Rep	M	0:07:56.938-0:07:57.204	IT3	0.305379	8	1.14403
Trial 1	1.3	Rep	M	0:07:57.204-0:07:57.470	IT3	0.117885	8	0.441625
Trial 1	1.3	Rep	M	0:07:57.470-0:07:57.736	IT3	0.0627534	8	0.23509
Trial 1	1.3	Rep	M	0:07:57.736-0:07:58.002	IT3	0.0829535	8	0.310764
Trial 1	1.3	Rep	M	0:07:58.002-0:07:58.268	IT3	0.0882646	8	0.330659
Trial 1	1.3	Rep	M	0:07:58.268-0:07:58.534	IT3	0.16554	8	0.620155
Trial 1	1.3	Rep	M	0:07:58.534-0:07:58.800	IT3	0.121675	8	0.455823
Trial 1	1.3	Rep	M	0:07:58.800-0:07:59.066	IT3	0.0483876	8	0.181272
Trial 1	1.3	Rep	M	0:07:59.066-0:07:59.332	IT3	0.0506215	8	0.189641
Trial 1	1.3	Rep	M	0:07:59.332-0:07:59.598	IT3	0.0303317	8	0.11363
Trial 1	1.3	Rep	M	0:07:59.598-0:07:59.864	IT3	0.020025	8	0.0750193
Trial 1	1.3	Rep	M	0:07:59.864-0:08:00.130	IT3	0.118715	8	0.444734
Trial 1	1.3	Rep	M	0:08:00.130-0:08:00.396	IT3	0.0893121	8	0.334586
Trial 1	1.3	Rep	M	0:08:00.396-0:08:00.662	IT3	0.112862	8	0.42281
Trial 1	1.3	Rep	M	0:08:00.662-0:08:00.928	IT3	0.0299696	8	0.112274
Trial 1	1.3	Rep	M	0:08:00.928-0:08:01.194	IT3	0.096917	8	0.363073
Trial 1	1.3	Rep	M	0:08:01.194-0:08:01.460	IT3	0.0735624	8	0.275582
Trial 1	1.3	Rep	M	0:08:01.460-0:08:01.726	IT3	0.0943031	8	0.353283
Trial 1	1.3	Rep	M	0:08:01.726-0:08:01.992	IT3	0.157139	8	0.588681
Trial 1	1.3	Rep	M	0:08:01.992-0:08:02.258	IT3	0.272159	8	1.01957
Trial 1	1.3	Rep	M	0:08:02.258-0:08:02.524	IT3	0.117697	8	0.440922
Trial 1	1.3	Rep	M	0:08:02.524-0:08:02.790	IT3	0.157984	8	0.591846
Trial 1	1.3	Rep	M	0:08:02.790-0:08:03.056	IT3	0.113045	8	0.423494
Trial 1	1.3	Rep	M	0:08:03.056-0:08:03.322	IT3	0.0569865	8	0.213485
Trial 1	1.3	Rep	M	0:08:03.322-0:08:03.588	IT3	0.0750568	8	0.28118
Trial 1	1.3	Rep	M	0:08:03.588-0:08:03.854	IT3	0.0631845	8	0.236704
Trial 1	1.3	Rep	M	0:08:03.854-0:08:04.120	IT3	0.0728817	8	0.273032
Trial 1	1.3	Rep	M	0:08:04.120-0:08:04.386	IT3	0.0743915	8	0.278689
Trial 1	1.3	Rep	M	0:08:04.386-0:08:04.652	IT3	0.0392647	8	0.147095
Trial 1	1.3	Rep	M	0:08:04.652-0:08:04.918	IT3	0.151608	7	0.649094
Trial 1	1.3	Rep	M	0:08:04.918-0:08:05.184	IT3	0.0898271	8	0.336515
Trial 1	1.3	Rep	M	0:08:05.184-0:08:05.450	IT3	0.0818325	8	0.306568
Trial 1	1.3	Rep	M	0:08:05.450-0:08:05.716	IT3	0.14494	8	0.542981
Trial 1	1.3	Rep	M	0:08:05.716-0:08:05.982	IT3	0.119489	8	0.447633
Trial 1	1.3	Rep	M	0:08:05.982-0:08:06.248	IT3	0.02869	8	0.107479
Trial 1	1.3	Rep	M	0:08:06.248-0:08:06.514	IT3	0.0460089	8	0.17236
Trial 1	1.3	Rep	M	0:08:06.514-0:08:06.780	IT3	0.0767732	8	0.287611
Trial 1	1.3	Rep	M	0:08:06.780-0:08:07.046	IT3	0.109878	8	0.411626
Trial 1	1.3	Rep	M	0:08:07.046-0:08:07.312	IT3	0.230515	8	0.863567
Trial 1	1.3	Rep	M	0:08:07.312-0:08:07.578	IT3	0.276975	8	1.03761
Trial 1	1.3	Rep	M	0:08:07.578-0:08:07.844	IT3	0.192883	8	0.722588
Trial 1	1.3	Rep	M	0:08:07.844-0:08:08.110	IT3	0.109366	8	0.409711
Trial 1	1.3	Rep	M	0:08:08.110-0:08:08.376	IT3	0.0687441	8	0.257533
Trial 1	1.3	Rep	M	0:08:08.376-0:08:08.642	IT3	0.0336615	8	0.126105
Trial 1	1.3	Rep	M	0:08:08.642-0:08:08.908	IT3	0.0643052	8	0.240901
Trial 1	1.3	Rep	M	0:08:08.908-0:08:09.174	IT3	0.0738065	8	0.276497
Trial 1	1.3	Rep	M	0:08:09.174-0:08:09.440	IT3	0.0331393	8	0.124148
Trial 1	1.3	Rep	M	0:08:09.440-0:08:09.706	IT3	0.0589131	8	0.220704
Trial 1	1.3	Rep	M	0:08:09.706-0:08:09.972	IT3	0.0371934	8	0.139336
Trial 1	1.3	Rep	M	0:08:09.972-0:08:10.238	IT3	0.0921265	8	0.345128
Trial 1	1.3	Rep	M	0:08:10.238-0:08:10.504	IT3	0.0344926	8	0.129218
Trial 1	1.3	Rep	M	0:08:10.504-0:08:10.770	IT3	0.0769653	8	0.288331
Trial 1	1.3	Rep	M	0:08:10.770-0:08:11.036	IT3	0.0747838	8	0.280158
Trial 1	1.3	Rep	M	0:08:11.036-0:08:11.302	IT3	0.104566	8	0.39173
Trial 1	1.3	Rep	M	0:08:11.302-0:08:11.568	IT3	0.121171	8	0.453931
Trial 1	1.3	Rep	M	0:08:11.568-0:08:11.834	IT3	0.114284	8	0.428137
Trial 1	1.3	Rep	M	0:08:11.834-0:08:12.100	IT3	0.177398	8	0.66458
Trial 1	1.3	Rep	M	0:08:12.100-0:08:12.366	IT3	0.0440366	8	0.164972
Trial 1	1.3	Rep	M	0:08:12.366-0:08:12.632	IT3	0.140391	8	0.525939
Trial 1	1.3	Rep	M	0:08:12.632-0:08:12.898	IT3	0.162898	8	0.610256
Trial 1	1.3	Rep	M	0:08:12.898-0:08:13.164	IT3	0.0980349	8	0.367262
Trial 1	1.3	Rep	M	0:08:13.164-0:08:13.430	IT3	0.0480823	8	0.180128
Trial 1	1.3	Rep	M	0:08:13.430-0:08:13.696	IT3	0.071895	8	0.269338
Trial 1	1.3	Rep	M	0:08:13.696-0:08:13.962	IT3	0.063588	8	0.238217
Trial 1	1.3	Rep	M	0:08:13.962-0:08:14.228	IT3	0.172882	8	0.647657
Trial 1	1.3	Rep	M	0:08:14.228-0:08:14.494	IT3	0.237301	7	1.01598
Trial 1	1.3	Rep	M	0:08:14.494-0:08:14.760	IT3	0.21219	8	0.79492
Trial 1	1.3	Rep	M	0:08:14.760-0:08:15.026	IT3	0.501417	8	1.87843
Trial 1	1.3	Rep	M	0:08:15.026-0:08:15.292	IT3	0.42696	8	1.5995
Trial 1	1.3	Rep	M	0:08:15.292-0:08:15.558	IT3	0.684005	8	2.56245
Trial 1	1.3	Rep	M	0:08:15.558-0:08:15.824	IT3	0.65753	8	2.46327
Trial 1	1.3	Rep	M	0:08:15.824-0:08:16.090	IT3	0.489873	8	1.8352
Trial 1	1.3	Rep	M	0:08:16.090-0:08:16.356	IT3	0.297601	8	1.11488
Trial 1	1.3	Rep	M	0:08:16.356-0:08:16.622	IT3	0.397293	8	1.48835
Trial 1	1.3	Rep	M	0:08:16.622-0:08:16.888	IT3	0.774377	8	2.90101
Trial 1	1.3	Rep	M	0:08:16.888-0:08:17.154	IT3	0.676262	8	2.53344
Trial 1	1.3	Rep	M	0:08:17.154-0:08:17.420	IT3	0.73631	8	2.75841
Trial 1	1.3	Rep	M	0:08:17.420-0:08:17.686	IT3	1.97501	8	7.39888
Trial 1	1.3	Rep	M	0:08:17.686-0:08:17.952	IT3	1.18067	8	4.42306
Trial 1	1.3	Rep	M	0:08:17.952-0:08:18.218	IT3	0.525653	8	1.96923
Trial 1	1.3	Rep	M	0:08:18.218-0:08:18.484	IT3	0.254312	8	0.952711
Trial 1	1.3	Rep	M	0:08:18.484-0:08:18.750	IT3	1.44694	8	5.42062
Trial 1	1.3	Rep	M	0:08:18.750-0:08:19.016	IT3	0.571758	8	2.14194
Trial 1	1.3	Rep	M	0:08:19.016-0:08:19.282	IT3	0.499979	8	1.87304
Trial 1	1.3	Rep	M	0:08:19.282-0:08:19.548	IT3	0.948153	8	3.55202
Trial 1	1.3	Rep	M	0:08:19.548-0:08:19.814	IT3	1.14399	8	4.28565
Trial 1	1.3	Rep	M	0:08:19.814-0:08:20.080	IT3	2.71961	8	10.1884
Trial 1	1.3	Rep	M	0:08:20.080-0:08:20.346	IT3	2.91853	8	10.9335
Trial 1	1.3	Rep	M	0:08:20.346-0:08:20.612	IT3	1.70225	8	6.37704
Trial 1	1.3	Rep	M	0:08:20.612-0:08:20.878	IT3	1.28882	8	4.82825
Trial 1	1.3	Rep	M	0:08:20.878-0:08:21.144	IT3	1.93326	8	7.24247
Trial 1	1.3	Rep	M	0:08:21.144-0:08:21.410	IT3	1.10194	8	4.12812
Trial 1	1.3	Rep	M	0:08:21.410-0:08:21.676	IT3	0.371693	8	1.39245
Trial 1	1.3	Rep	M	0:08:21.676-0:08:21.942	IT3	1.15097	8	4.3118
Trial 1	1.3	Rep	M	0:08:21.942-0:08:22.208	IT3	1.08874	8	4.07872
Trial 1	1.3	Rep	M	0:08:22.208-0:08:22.474	IT3	0.235888	8	0.883693
Trial 1	1.3	Rep	M	0:08:22.474-0:08:22.740	IT3	0.119862	8	0.449032
Trial 1	1.3	Rep	M	0:08:22.740-0:08:23.006	IT3	0.295211	8	1.10593
Trial 1	1.3	Rep	M	0:08:23.006-0:08:23.272	IT3	0.318442	8	1.19296
Trial 1	1.3	Rep	M	0:08:23.272-0:08:23.538	IT3	0.922645	8	3.45645
Trial 1	1.3	Rep	M	0:08:23.538-0:08:23.804	IT3	0.75623	8	2.83302
Trial 1	1.3	Rep	M	0:08:23.804-0:08:24.070	IT3	0.486881	7	2.08454
Trial 1	1.3	Rep	M	0:08:24.070-0:08:24.336	IT3	0.678594	8	2.54218
Trial 1	1.3	Rep	M	0:08:24.336-0:08:24.602	IT3	1.15269	8	4.31825
Trial 1	1.3	Rep	M	0:08:24.602-0:08:24.868	IT3	1.95048	8	7.30698
Trial 1	1.3	Rep	M	0:08:24.868-0:08:25.134	IT3	1.38397	8	5.1847
Trial 1	1.3	Rep	M	0:08:25.134-0:08:25.400	CS4a	0.493592	8	1.84911
Trial 1	1.3	Rep	M	0:08:25.400-0:08:25.666	CS4a	0.306276	8	1.14739
Trial 1	1.3	Rep	M	0:08:25.666-0:08:25.932	CS4a	0.192999	8	0.723019
Trial 1	1.3	Rep	M	0:08:25.932-0:08:26.198	CS4a	0.139348	8	0.522029
Trial 1	1.3	Rep	M	0:08:26.198-0:08:26.464	CS4a	0.0865024	8	0.32406
Trial 1	1.3	Rep	M	0:08:26.464-0:08:26.730	CS4a	0.137464	8	0.514973
Trial 1	1.3	Rep	M	0:08:26.730-0:08:26.996	CS4a	0.163547	8	0.612691
Trial 1	1.3	Rep	M	0:08:26.996-0:08:27.262	CS4a	0.151023	8	0.56577
Trial 1	1.3	Rep	M	0:08:27.262-0:08:27.528	CS4a	0.114556	8	0.429153
Trial 1	1.3	Rep	M	0:08:27.528-0:08:27.794	CS4a	0.165262	8	0.619114
Trial 1	1.3	Rep	M	0:08:27.794-0:08:28.060	CS4a	0.0888564	8	0.332878
Trial 1	1.3	Rep	M	0:08:28.060-0:08:28.326	CS4a	0.199502	8	0.747381
Trial 1	1.3	Rep	M	0:08:28.326-0:08:28.592	CS4a	0.0602435	8	0.225687
Trial 1	1.3	Rep	M	0:08:28.592-0:08:28.858	CS4a	0.134119	8	0.502442
Trial 1	1.3	Rep	M	0:08:28.858-0:08:29.124	CS4a	0.128733	8	0.482266
Trial 1	1.3	Rep	M	0:08:29.124-0:08:29.390	CS4a	0.156785	8	0.587358
Trial 1	1.3	Rep	M	0:08:29.390-0:08:29.656	CS4a	0.059564	8	0.223143
Trial 1	1.3	Rep	M	0:08:29.656-0:08:29.922	CS4a	0.122488	8	0.458868
Trial 1	1.3	Rep	M	0:08:29.922-0:08:30.188	CS4a	0.0847812	8	0.317614
Trial 1	1.3	Rep	M	0:08:30.188-0:08:30.454	CS4a	0.070111	8	0.262652
Trial 1	1.3	Rep	M	0:08:30.454-0:08:30.720	CS4a	0.167791	8	0.628586
Trial 1	1.3	Rep	M	0:08:30.720-0:08:30.986	CS4a	0.0741493	8	0.277782
Trial 1	1.3	Rep	M	0:08:30.986-0:08:31.252	CS4a	0.18525	8	0.69399
Trial 1	1.3	Rep	M	0:08:31.252-0:08:31.518	CS4a	0.0807629	8	0.302558
Trial 1	1.3	Rep	M	0:08:31.518-0:08:31.784	CS4a	0.116561	8	0.436666
Trial 1	1.3	Rep	M	0:08:31.784-0:08:32.050	CS4a	0.0950001	8	0.355892
Trial 1	1.3	Rep	M	0:08:32.050-0:08:32.316	CS4a	0.117078	8	0.438606
Trial 1	1.3	Rep	M	0:08:32.316-0:08:32.582	CS4a	0.0997272	8	0.373602
Trial 1	1.3	Rep	M	0:08:32.582-0:08:32.848	CS4a	0.140632	8	0.52684
Trial 1	1.3	Rep	M	0:08:32.848-0:08:33.114	CS4a	0.16452	8	0.616334
Trial 1	1.3	Rep	M	0:08:33.114-0:08:33.380	CS4a	0.0967732	7	0.414327
Trial 1	1.3	Rep	M	0:08:33.380-0:08:33.646	CS4a	0.123677	8	0.463325
Trial 1	1.3	Rep	M	0:08:33.646-0:08:33.912	CS4a	0.092801	8	0.347656
Trial 1	1.3	Rep	M	0:08:33.912-0:08:34.178	CS4a	0.0820935	8	0.307541
Trial 1	1.3	Rep	M	0:08:34.178-0:08:34.444	CS4a	0.0627385	8	0.235036
Trial 1	1.3	Rep	M	0:08:34.444-0:08:34.710	CS4a	0.0427537	8	0.160167
Trial 1	1.3	Rep	M	0:08:34.710-0:08:34.976	CS4a	0.133552	8	0.500321
Trial 1	1.3	Rep	M	0:08:34.976-0:08:35.242	CS4a	0.126214	8	0.472835
Trial 1	1.3	Rep	M	0:08:35.242-0:08:35.508	CS4b	7.28349	8	27.2858
Trial 1	1.3	Rep	M	0:08:35.508-0:08:35.774	CS4b	8.57078	8	32.1084
Trial 1	1.3	Rep	M	0:08:35.774-0:08:36.040	CS4b	4.34766	8	16.2874
Trial 1	1.3	Rep	M	0:08:36.040-0:08:36.306	CS4b	0.678975	8	2.5436
Trial 1	1.3	Rep	M	0:08:36.306-0:08:36.572	CS4b	0.399548	8	1.49681
Trial 1	1.3	Rep	M	0:08:36.572-0:08:36.838	CS4b	0.217558	8	0.815025
Trial 1	1.3	Rep	M	0:08:36.838-0:08:37.104	CS4b	0.110508	8	0.413994
Trial 1	1.3	Rep	M	0:08:37.104-0:08:37.370	CS4b	0.133134	8	0.498752
Trial 1	1.3	Rep	M	0:08:37.370-0:08:37.636	CS4b	0.0832085	8	0.311718
Trial 1	1.3	Rep	M	0:08:37.636-0:08:37.902	CS4b	0.136887	8	0.512811
Trial 1	1.3	Rep	M	0:08:37.902-0:08:38.168	CS4b	0.0667431	8	0.250035
Trial 1	1.3	Rep	M	0:08:38.168-0:08:38.434	CS4b	0.109378	8	0.409759
Trial 1	1.3	Rep	M	0:08:38.434-0:08:38.700	CS4b	0.0625902	8	0.234477
Trial 1	1.3	Rep	M	0:08:38.700-0:08:38.966	CS4b	0.115708	8	0.43347
Trial 1	1.3	Rep	M	0:08:38.966-0:08:39.232	CS4b	0.0944034	8	0.353662
Trial 1	1.3	Rep	M	0:08:39.232-0:08:39.498	CS4b	0.115807	8	0.433841
Trial 1	1.3	Rep	M	0:08:39.498-0:08:39.764	CS4b	0.191402	8	0.717036
Trial 1	1.3	Rep	M	0:08:39.764-0:08:40.030	CS4b	0.108977	8	0.408257
Trial 1	1.3	Rep	M	0:08:40.030-0:08:40.296	CS4b	0.148807	8	0.557468
Trial 1	1.3	Rep	M	0:08:40.296-0:08:40.562	CS4b	0.102722	8	0.384823
Trial 1	1.3	Rep	M	0:08:40.562-0:08:40.828	CS4b	0.180361	8	0.675676
Trial 1	1.3	Rep	M	0:08:40.828-0:08:41.094	CS4b	0.0993906	8	0.372343
Trial 1	1.3	Rep	M	0:08:41.094-0:08:41.360	CS4b	0.0821059	8	0.30759
Trial 1	1.3	Rep	M	0:08:41.360-0:08:41.626	CS4b	0.111307	8	0.416983
Trial 1	1.3	Rep	M	0:08:41.626-0:08:41.892	CS4b	0.15157	8	0.567823
Trial 1	1.3	Rep	M	0:08:41.892-0:08:42.158	CS4b	0.170459	8	0.638583
Trial 1	1.3	Rep	M	0:08:42.158-0:08:42.424	CS4b	0.133121	8	0.498705
Trial 1	1.3	Rep	M	0:08:42.424-0:08:42.690	CS4b	0.158652	8	0.594348
Trial 1	1.3	Rep	M	0:08:42.690-0:08:42.956	CS4b	0.068193	7	0.291964
Trial 1	1.3	Rep	M	0:08:42.956-0:08:43.222	CS4b	0.169824	8	0.6362
Trial 1	1.3	Rep	M	0:08:43.222-0:08:43.488	CS4b	0.204403	8	0.76575
Trial 1	1.3	Rep	M	0:08:43.488-0:08:43.754	CS4b	0.123373	8	0.462186
Trial 1	1.3	Rep	M	0:08:43.754-0:08:44.020	CS4b	0.098993	8	0.370855
Trial 1	1.3	Rep	M	0:08:44.020-0:08:44.286	CS4b	0.077401	8	0.289963
Trial 1	1.3	Rep	M	0:08:44.286-0:08:44.552	CS4b	0.161714	8	0.605819
Trial 1	1.3	Rep	M	0:08:44.552-0:08:44.818	CS4b	0.163142	8	0.61117
Trial 1	1.3	Rep	M	0:08:44.818-0:08:45.084	CS4b	0.193033	8	0.723145
Trial 1	1.3	Rep	M	0:08:45.084-0:08:45.350	IT4	0.0740198	8	0.277298
Trial 1	1.3	Rep	M	0:08:45.350-0:08:45.616	IT4	0.181096	8	0.678435
Trial 1	1.3	Rep	M	0:08:45.616-0:08:45.882	IT4	0.0828891	8	0.310523
Trial 1	1.3	Rep	M	0:08:45.882-0:08:46.148	IT4	0.0909129	8	0.340583
Trial 1	1.3	Rep	M	0:08:46.148-0:08:46.414	IT4	0.134064	8	0.502236
Trial 1	1.3	Rep	M	0:08:46.414-0:08:46.680	IT4	0.0849138	8	0.318112
Trial 1	1.3	Rep	M	0:08:46.680-0:08:46.946	IT4	0.20725	8	0.776409
Trial 1	1.3	Rep	M	0:08:46.946-0:08:47.212	IT4	0.125045	8	0.468452
Trial 1	1.3	Rep	M	0:08:47.212-0:08:47.478	IT4	0.159903	8	0.599041
Trial 1	1.3	Rep	M	0:08:47.478-0:08:47.744	IT4	0.0470007	8	0.176077
Trial 1	1.3	Rep	M	0:08:47.744-0:08:48.010	IT4	0.113435	8	0.424957
Trial 1	1.3	Rep	M	0:08:48.010-0:08:48.276	IT4	0.158532	8	0.5939
Trial 1	1.3	Rep	M	0:08:48.276-0:08:48.542	IT4	0.0571107	8	0.21395
Trial 1	1.3	Rep	M	0:08:48.542-0:08:48.808	IT4	0.0622955	8	0.233374
Trial 1	1.3	Rep	M	0:08:48.808-0:08:49.074	IT4	0.0951741	8	0.356545
Trial 1	1.3	Rep	M	0:08:49.074-0:08:49.340	IT4	0.138144	8	0.517521
Trial 1	1.3	Rep	M	0:08:49.340-0:08:49.606	IT4	0.145169	8	0.543842
Trial 1	1.3	Rep	M	0:08:49.606-0:08:49.872	IT4	0.149854	8	0.56139
Trial 1	1.3	Rep	M	0:08:49.872-0:08:50.138	IT4	0.0971355	8	0.363897
Trial 1	1.3	Rep	M	0:08:50.138-0:08:50.404	IT4	0.15278	8	0.572349
Trial 1	1.3	Rep	M	0:08:50.404-0:08:50.670	IT4	0.0535762	8	0.200709
[truncated: 153,413 more rows]
