# Supplementary material for: Conditional and unconditional components of aversively motivated freezing, flight and darting in mice
Source: eLife. 2022 May 26;11:e75663. doi: 10.7554/eLife.75663 (PMC9173745; doi:10.7554/eLife.75663)
Supplement: Figure 4—figure supplement 1—source data 1. [file elife-75663-fig4-figsupp1-data1.xlsx]

## Sheet: Sheet1
Combined data from all groups of Experiment 2 for freezing, PAR, and darting across Day 1 and Day 2 - acquisiton and Day 3 - testing.
Grey = Data Irrelevant/Not Available
As seen in Figure 4-figure supplement 1
					Day 1						Day 2						Day 3
Experiment	Group	Measure	Sex	CS	BL	1	2	3	4	5	BL	6	7	8	9	10	BL	1	2	3	4	5	6	7	8	9	10	11	12	13	14	15	16
2	Paired	Freezing	F	Noise	0	0	86.67	24.67	42	37.33	77.96	14.67	0	37.33	29.67	91.33	70.09	62	55.33	63.33	53.33	23.67	94.33	56.33	79.33	74.33	41	83.67	84	96.33	94	82.33	82
2	Paired	Freezing	F	Noise	1.72	0	0	100	99.33	100	98.31	100	72	84.67	75	66	94.07	100	89	100	100	100	74	99.67	100	99.67	100	100	63	63.67	100	0	94
2	Paired	Freezing	F	Noise	1.87	0	75	73.67	21.67	91	81.22	10	96.33	51.33	25.33	56.33	95.09	90.67	80	96.33	95	96.67	91.33	97.33	72.67	49.33	92.33	77.67	79.67	97.33	84.67	97	94
2	Paired	Freezing	F	Noise	0	0	43	39.67	57.33	41.67	29.39	46	89.67	89.33	30.67	67.33	74.13	46	80.33	55.33	46.67	72.33	82.67	96.67	82.67	82.33	90.33	82	62	86	89	84.67	88.33
2	Paired	Freezing	M	Noise	0	10.33	61.33	26	0	76.67	71.72	10.33	10	78.33	83	34.67	72.63	62	89.33	94.67	68	52	63.33	91.33	78.33	96.67	59.33	83	62	95.67	94	96.67	95.67
2	Paired	Freezing	M	Noise	1	0	0	21.33	30	0	89.65	39.67	0	35.67	47.67	69.33	99.06	86.33	53	77.67	94.67	38.33	95.67	97.33	84.67	95.67	95	86.67	97.33	92.67	78.33	97.67	95
2	Paired	Freezing	M	Noise	1.94	0	29.33	10.67	40.33	0	73.63	0	0	69	61.67	39.67	79.54	0	49	71.33	92	28	98	38	60.67	74.67	41	59.33	69.33	61.33	97.33	97.33	97.33
2	Paired	Freezing	M	Noise	0.83	0	51	47	63.33	76.33	76.78	0	0	91.33	30	10.33	66.74	18	66	87.67	50	72.67	34.33	84.67	86.67	82.67	61.67	97.33	67.67	55.67	76	68.67	91
2	Shock-NoiseTest	Freezing	F	Noise	0	0	28.67	21	88.33	100	73.7	71	84.67	100	100	100	91.5	0	23.67	68.67	60	36	0	0	55.33	11.67	12.33	73.33	61.67	0	37	45.67	18
2	Shock-NoiseTest	Freezing	F	Noise	0	11.33	33	97.33	96	87.67	93.37	98	100	100	100	100	64.89	12.67	11	79.33	77.67	42.67	0	72.33	12.67	32.33	0	52.67	0	17.67	59	29.33	81
2	Shock-NoiseTest	Freezing	F	Noise	0.59	0	22.33	80.33	100	94.33	95.65	100	100	100	100	100	92.37	0	0	0	10	0	0	78.67	72	0	0	16	11.67	54.33	0	12	26.67
2	Shock-NoiseTest	Freezing	F	Noise	0	0	32	100	99	100	78.59	100	95	100	99.67	99.33	86.87	0	0	0	46	0	0	37.33	59.67	10	0	42.67	26.67	57	27	33.67	0
2	Shock-NoiseTest	Freezing	M	Noise	0	0	0	0	38	73.67	84.91	64.33	81.67	77.33	99.67	87.67	89.85	15.67	0	0	51	79	48.33	37.33	22.33	53.33	0	83.67	24.67	62.67	58.33	15	0
2	Shock-NoiseTest	Freezing	M	Noise	1.33	0	77	96.67	99.67	100	73.13	84	71.67	100	99.67	84	94.06	95	48	30	78.67	52.67	63.33	47	10.33	30.67	99.33	80	21.67	11	0	30.33	11.33
2	Shock-NoiseTest	Freezing	M	Noise	0.61	10	0	72	91.67	71.33	95	100	87.67	89.67	92.33	61.67	97.61	24.67	35.33	84	0	49.33	29.33	46	77.67	75.33	64	61.33	72	58	0	0	35
2	Shock-NoiseTest	Freezing	M	Noise	0.69	0	0	13.67	76	82	85.09	86.33	59.67	100	82.67	99.67	84.5	40.33	17.33	47.33	70.33	0	62	0	24.67	61.33	44.67	70	13.33	48	75	11.67	39.67
2	Shock-ToneTest	Freezing	F	Noise	0.59	0	0	0	100	98.67	87.13	99.67	100	99.33	100	99.33	83.65	23.33	85.67	86.67	51.67	0	23.33	59.33	0	72.67	43	88.33	86	99.67	46.67	69	85
2	Shock-ToneTest	Freezing	F	Noise	0	0	0	90	0	17.33	79.28	100	99	80.67	42.33	78.67	85.22	72	40	41	95.67	50.67	74.67	97.33	30.33	64.67	35.67	12.33	10.67	41.33	0	24	46.33
2	Shock-ToneTest	Freezing	F	Noise	2.65	0	0	14	66.33	33.67	43.11	91.67	51.33	100	97.67	93	85.89	77	12.67	0	36	48	46.67	26.33	55.33	15.33	27.33	26.67	85	28.33	0	0	11.33
2	Shock-ToneTest	Freezing	F	Noise	0	0	28	99.33	100	100	63.11	100	97.67	100	100	100	80.56	50.67	49.33	100	100	86.67	100	92.67	100	39.67	87.33	61.67	52.67	76.33	41.67	60.33	16.67
2	Shock-ToneTest	Freezing	M	Noise	0	0	0	66.67	74.67	99.67	93.89	100	100	96.33	100	100	96.07	40.67	75.67	84.33	42.33	59.67	84	38.33	88	77	50.33	0	0	0	80	21.33	72.67
2	Shock-ToneTest	Freezing	M	Noise	0	0	0	74	99.67	99.67	98.94	99.67	98.33	93	100	100	99.74	100	60.33	48.67	100	44	93.67	53.67	83.33	100	96	90.33	77.33	80.33	81.67	23	68.33
2	Shock-ToneTest	Freezing	M	Noise	0.72	0	11.33	26	34.33	84.67	78.17	99.67	63	59.33	98	39.67	81.15	0	53.33	49.67	80	23.33	38.33	20	36	11.33	53.67	59.33	55	35	54	60	44
2	Shock-ToneTest	Freezing	M	Noise	0.56	0	0	27.33	98.33	97	75.41	78.33	100	100	100	100	88.67	100	87.33	0	100	100	100	100	100	100	100	91.33	98	90.67	100	100	53.67
2	NoShock-NoiseTest	Freezing	F	Noise	0.59	0	0	20.67	0	0	0.57	0	0	0	0	0	0	25	40.33	69	50.33	61	69.33	42	27	78	32.67	23.67	59.33	48.33	71	44	67.33
2	NoShock-NoiseTest	Freezing	F	Noise	0	27.67	0	0	0	16.67	3.13	0	0	38	0	0	9.8	15.67	0	39	56.67	0	46.67	0	45	33	56	11.33	37.33	13	54	13	57.33
2	NoShock-NoiseTest	Freezing	F	Noise	1.26	0	0	0	0	0	3	0	0	0	0	0	3.54	0	36	14.33	11.67	59	35.33	25.67	48	46.33	35.67	0	45.33	0	44.33	27	26.33
2	NoShock-NoiseTest	Freezing	F	Noise	0	0	0	13.33	11	17.33	1.52	0	0	0	26.67	21	5.93	0	0	30	0	32.33	63	51.67	0	17	0	27.33	17.33	11.67	10.33	30.67	57.33
2	NoShock-NoiseTest	Freezing	M	Noise	0	0	0	0	0	0	0	0	0	0	0	0	3.06	14.67	50.67	34.33	47.67	16.33	0	59	16	29.67	73	70.67	64.67	12.33	32.33	0	36.67
2	NoShock-NoiseTest	Freezing	M	Noise	0.67	0	0	0	0	0	9.39	0	0	0	0	0	18.54	42	0	39.33	0	0	0	22	10.33	0	10.33	14.33	26.67	62.33	52.33	22.67	0
2	NoShock-NoiseTest	Freezing	M	Noise	2.39	0	0	0	0	0	1.78	0	0	14.33	10	0	3.44	12.33	44.67	39	0	32	40	0	46	25	16.67	16.67	46	14	35.67	57.67	46.67
2	NoShock-NoiseTest	Freezing	M	Noise	1.39	0	0	0	0	0	3.39	32	0	0	36	11	6.24	51	60.33	80.67	73.33	71.67	68.67	90.33	88.67	75.67	89.67	81.67	80	44.33	65.33	95.67	83
2	Paired	PAR	F	Noise														0.8	1	0.79	0.75	1	0.67	0.79	0.39	0.63	0.45	0.66	0.57	0.91	0.59	0.68	0.63
2	Paired	PAR	F	Noise														0.5	0.28	0.5	0.5	0.5	0.64	0.42	0.5	1	0.5	0.5	0.44	0.45	0.05	0.72	0.29
2	Paired	PAR	F	Noise														1	0.9	0.55	0.32	0.12	1	0.69	0.46	1	0.88	0.63	0.54	0.16	0.48	0.96	0.48
2	Paired	PAR	F	Noise														0.92	0.42	0.99	0.77	0.86	0.46	0.35	0.73	0.64	0.7	0.35	0.78	0.47	0.72	0.36	0.42
2	Paired	PAR	M	Noise														0.95	0.32	0.71	0.94	0.79	0.91	0.54	0.48	0.61	0.91	0.47	0.92	0.55	0.41	0.53	0.53
2	Paired	PAR	M	Noise														0.98	1	1	1	1	0.59	0.88	0.99	0.95	0.8	0.61	1	1	0.51	0.54	0.22
2	Paired	PAR	M	Noise														0.94	1	1	0.91	0.75	0.98	0.99	0.87	0.94	0.78	0.52	0.87	0.85	0.43	0.89	0.71
2	Paired	PAR	M	Noise														0.79	0.59	0.5	0.62	0.67	0.73	0.6	0.49	0.73	0.66	0.69	0.8	0.66	0.54	0.76	0.43
2	Shock-NoiseTest	PAR	F	Noise														0.93	1	0.84	1	1	1	0.54	1	1	0.65	0.59	0.84	1	1	1	0.86
2	Shock-NoiseTest	PAR	F	Noise														0.78	0.9	0.97	0.22	0.98	0.96	0.71	0.92	0.9	0.97	0.86	1	0.99	0.96	0.7	0.79
2	Shock-NoiseTest	PAR	F	Noise														1	1	0.96	1	1	1	0.87	1	1	0.51	1	1	1	1	0.78	1
2	Shock-NoiseTest	PAR	F	Noise														0.91	1	1	1	1	1	1	1	1	1	1	0.99	1	1	1	1
2	Shock-NoiseTest	PAR	M	Noise														0.92	1	1	0.59	1	0.93	0.92	1	0.72	0.78	0.83	0.61	0.73	0.73	0.92	0.93
2	Shock-NoiseTest	PAR	M	Noise														0.59	0.85	0.49	0.25	0.24	0.41	0.71	0.54	0.42	0.23	1	0.81	0.82	0.34	0.57	0.45
2	Shock-NoiseTest	PAR	M	Noise														0.98	1	0.76	0.91	0.98	0.74	0.99	0.6	0.46	0.8	0.62	0.77	0.45	0.78	0.57	0.49
2	Shock-NoiseTest	PAR	M	Noise														0.77	1	1	0.96	1	0.97	0.73	1	1	0.38	1	0.77	1	0.73	1	1
2	Shock-ToneTest	PAR	F	Noise														1	0.31	0.85	0.44	1	0.83	0.34	1	0.51	0.55	0.35	0.46	0.19	0.2	0.38	1
2	Shock-ToneTest	PAR	F	Noise														0.45	1	0.82	0.01	1	0.55	0.02	0.93	0.42	0.11	1	0.62	0.6	0.8	0.63	0.55
2	Shock-ToneTest	PAR	F	Noise														0.7	0.81	0.73	0.8	0.57	1	0.42	1	0.6	0.5	0.58	1	0.61	0.7	0.72	0.67
2	Shock-ToneTest	PAR	F	Noise														0.55	0.96	0.5	0.7	0.9	0.99	1	0.66	0.71	1	0.51	0.31	1	1	1	0.47
2	Shock-ToneTest	PAR	M	Noise														1	0.98	0.36	0.69	0.98	0.41	1	0.28	0.58	0.33	0.63	0.69	0.61	0.38	0.99	0.95
2	Shock-ToneTest	PAR	M	Noise														0.5	0.93	1	0.05	1	0.06	0.96	0.29	0.5	0.78	1	0.51	0.77	0.63	0.44	1
2	Shock-ToneTest	PAR	M	Noise														0.93	0.55	0.89	0.59	0.5	0.94	0.8	0.6	0.5	0.99	0.61	0.46	0.8	0.67	0.77	0.58
2	Shock-ToneTest	PAR	M	Noise														0.97	0.13	0.44	0.08	0.5	0	0.5	0.5	0.5	0.5	1	0.44	0.62	0.5	0.02	0.39
2	NoShock-NoiseTest	PAR	F	Noise														0.55	0.28	0.39	0.45	0.28	0.55	0.33	0.46	0.45	0.26	0.41	0.49	0.37	0.49	0.66	0.64
2	NoShock-NoiseTest	PAR	F	Noise														0.52	0.34	0.48	0.44	0.53	0.3	0.69	0.22	0.43	0.6	0.62	0.24	0.49	0.37	0.48	0.69
2	NoShock-NoiseTest	PAR	F	Noise														0.62	0.56	0.4	0.34	0.46	0.42	0.32	0.41	0.59	0.31	0.59	0.36	0.39	0.28	0.47	0.31
2	NoShock-NoiseTest	PAR	F	Noise														0.54	0.49	0.45	0.43	0.5	0.44	0.32	0.53	0.38	0.76	0.52	0.6	0.61	0.54	0.65	0.42
2	NoShock-NoiseTest	PAR	M	Noise														0.61	0.41	0.41	0.37	0.72	0.74	0.52	0.55	0.62	0.3	0.56	0.26	0.58	0.63	0.67	0.42
2	NoShock-NoiseTest	PAR	M	Noise														0.59	0.55	0.23	0.5	0.57	0.57	0.72	0.41	0.64	0.48	0.2	0.52	0.59	0.34	0.43	0.51
2	NoShock-NoiseTest	PAR	M	Noise														0.53	0.55	0.37	0.4	0.45	0.34	0.59	0.38	0.41	0.53	0.58	0.6	0.31	0.3	0.5	0.36
2	NoShock-NoiseTest	PAR	M	Noise														0.47	0.2	0.67	0.58	0.36	0.61	0.54	0.74	0.28	0.56	0.79	0.47	0.51	0.26	0.48	0.54
2	Paired	Darting	F	Noise	0	6	0	0	0	0	0	12	0	6	0	0	0	6	0	0	0	0	6	0	0	0	0	0	0	0	0	6	0
2	Paired	Darting	F	Noise	0.333333	0	0	0	0	0	0	0	0	0	0	6	0	0	0	0	0	0	6	0	0	0	0	0	0	0	0	0	0
2	Paired	Darting	F	Noise	1.66667	0	6	0	6	0	0	6	0	6	6	12	0	0	0	0	0	0	0	0	0	0	0	0	0	0	0	0	0
2	Paired	Darting	F	Noise	3.66667	12	6	6	6	6	0	6	0	0	12	6	0.333333	0	0	0	0	0	0	0	0	0	0	0	0	0	0	0	0
2	Paired	Darting	M	Noise	1.66667	0	6	12	0	6	0	12	12	0	0	12	0	12	0	0	6	12	6	0	0	0	6	0	6	0	0	0	0
2	Paired	Darting	M	Noise	0.333333	0	0	0	12	6	0	12	18	6	6	6	0	0	6	0	0	0	0	0	0	0	0	0	0	0	0	0	0
2	Paired	Darting	M	Noise	0.666667	6	6	6	6	6	0.333333	12	12	0	0	6	0	6	0	0	0	0	0	18	6	6	0	0	6	6	0	0	0
2	Paired	Darting	M	Noise	0	6	0	0	0	0	0	12	18	0	0	12	0	0	0	0	0	0	0	0	0	0	6	0	6	6	0	6	0
2	Shock-NoiseTest	Darting	F	Noise	1						0						0	0	0	0	0	0	0	0	0	0	0	0	0	0	0	0	0
2	Shock-NoiseTest	Darting	F	Noise	1						0						1	6	6	6	0	6	12	0	6	6	6	0	6	6	6	0	0
2	Shock-NoiseTest	Darting	F	Noise	2						0						0	6	6	6	0	6	6	0	0	6	6	0	0	0	0	0	0
2	Shock-NoiseTest	Darting	F	Noise	1.33333						0						0	6	0	0	6	0	0	0	0	0	0	0	0	0	0	0	0
2	Shock-NoiseTest	Darting	M	Noise	0.333333						0						0	0	0	0	0	6	0	0	6	0	0	0	0	0	0	0	0
2	Shock-NoiseTest	Darting	M	Noise	0						0						0	0	6	18	0	12	6	0	6	0	0	12	0	0	6	0	0
2	Shock-NoiseTest	Darting	M	Noise	0						0						0	0	0	0	0	0	0	0	0	0	0	0	0	0	0	0	0
2	Shock-NoiseTest	Darting	M	Noise	1.33333						0						0	0	0	0	0	0	0	0	0	0	0	0	0	0	0	0	0
2	Shock-ToneTest	Darting	F	Noise	0.666667						0						0	0	0	0	0	0	0	0	0	0	0	0	0	0	0	0	0
2	Shock-ToneTest	Darting	F	Noise	1						0						1	6	0	0	0	0	0	6	0	0	0	0	0	0	0	0	0
2	Shock-ToneTest	Darting	F	Noise	2						0						0	6	6	0	0	0	0	0	0	0	0	0	0	0	0	0	0
2	Shock-ToneTest	Darting	F	Noise	1.66667						0						0	0	0	0	0	6	0	0	0	0	0	0	6	0	6	6	0
2	Shock-ToneTest	Darting	M	Noise	0.333333						0						0.333333	0	0	0	0	6	0	0	0	0	0	0	0	0	0	0	0
2	Shock-ToneTest	Darting	M	Noise	1.33333						0						0.333333	0	0	0	0	0	0	0	0	0	0	0	0	0	0	0	0
2	Shock-ToneTest	Darting	M	Noise	0						0						0	0	0	0	0	0	0	0	0	6	0	0	0	0	0	0	0
2	Shock-ToneTest	Darting	M	Noise	1.66667						0						0	0	0	6	6	0	0	0	0	6	0	0	6	0	0	0	0
2	NoShock-NoiseTest	Darting	F	Noise	0.666667						0.666667						0	0	12	6	0	0	0	6	6	0	0	0	0	0	0	6	6
2	NoShock-NoiseTest	Darting	F	Noise	0.333333						3.33333						0.333333	0	0	0	0	0	0	0	6	0	0	0	6	6	0	0	0
2	NoShock-NoiseTest	Darting	F	Noise	2						2.33333						2.66667	0	0	0	0	0	0	0	0	0	0	0	0	0	0	0	0
2	NoShock-NoiseTest	Darting	F	Noise	3.33333						1.33333						1.66667	6	6	6	6	12	6	6	6	6	0	6	0	0	0	6	6
2	NoShock-NoiseTest	Darting	M	Noise	1.66667						1						0.333333	0	0	0	0	0	0	0	0	0	0	0	0	0	0	0	0
2	NoShock-NoiseTest	Darting	M	Noise	0.333333						0.333333						0.333333	0	0	0	0	6	0	6	0	0	0	0	0	0	0	6	0
2	NoShock-NoiseTest	Darting	M	Noise	1.66667						0						0	0	0	0	0	0	0	6	0	0	0	0	0	6	0	0	0
2	NoShock-NoiseTest	Darting	M	Noise	0						1.66667						0.333333	0	0	0	0	0	0	0	0	0	0	0	0	0	0	0	0
