# Supplementary material for: Conditional and unconditional components of aversively motivated freezing, flight and darting in mice
Source: eLife. 2022 May 26;11:e75663. doi: 10.7554/eLife.75663 (PMC9173745; doi:10.7554/eLife.75663)
Supplement: Figure 4—source data 2. [file elife-75663-fig4-data2.xlsx]

## Sheet: Day 1
Raw velocity data, extracted via ethovision, which is fed to R source code 1 to detect and extract darts, and to produce velocity traces
Showing Data from Acquisition Day 1 for all animals in Experiment 2
Used to calculate Darts/minute as seen in Figure 4 and Figure 4-figure supplement 1
Trial	Animal	Group	Sex	TimeStamp	StimPeriod	Distance_cm	Samples	Velocity
Trial 1	1.1	S_TWN	F	Start-0:00:00.266	BL	1.47311	7	6.30704
Trial 1	1.1	S_TWN	F	0:00:00.266-0:00:00.532	BL	3.6948	8	13.8416
Trial 1	1.1	S_TWN	F	0:00:00.532-0:00:00.798	BL	2.52368	8	9.45434
Trial 1	1.1	S_TWN	F	0:00:00.798-0:00:01.064	BL	1.14195	8	4.27805
Trial 1	1.1	S_TWN	F	0:00:01.064-0:00:01.330	BL	1.26026	8	4.72125
Trial 1	1.1	S_TWN	F	0:00:01.330-0:00:01.596	BL	0.742662	8	2.78221
Trial 1	1.1	S_TWN	F	0:00:01.596-0:00:01.862	BL	2.41473	8	9.04617
Trial 1	1.1	S_TWN	F	0:00:01.862-0:00:02.128	BL	3.27161	8	12.2562
Trial 1	1.1	S_TWN	F	0:00:02.128-0:00:02.394	BL	3.0812	8	11.543
Trial 1	1.1	S_TWN	F	0:00:02.394-0:00:02.660	BL	3.46309	8	12.9736
Trial 1	1.1	S_TWN	F	0:00:02.660-0:00:02.926	BL	1.27698	8	4.7839
Trial 1	1.1	S_TWN	F	0:00:02.926-0:00:03.192	BL	1.23451	8	4.62479
Trial 1	1.1	S_TWN	F	0:00:03.192-0:00:03.458	BL	1.30725	8	4.89729
Trial 1	1.1	S_TWN	F	0:00:03.458-0:00:03.724	BL	0.762068	8	2.85491
Trial 1	1.1	S_TWN	F	0:00:03.724-0:00:03.990	BL	1.11521	8	4.17785
Trial 1	1.1	S_TWN	F	0:00:03.990-0:00:04.256	BL	1.48037	8	5.54586
Trial 1	1.1	S_TWN	F	0:00:04.256-0:00:04.522	BL	3.43219	8	12.8578
Trial 1	1.1	S_TWN	F	0:00:04.522-0:00:04.788	BL	4.50838	8	16.8895
Trial 1	1.1	S_TWN	F	0:00:04.788-0:00:05.054	BL	2.92939	8	10.9743
Trial 1	1.1	S_TWN	F	0:00:05.054-0:00:05.320	BL	1.39116	8	5.21163
Trial 1	1.1	S_TWN	F	0:00:05.320-0:00:05.586	BL	1.28716	8	4.82204
Trial 1	1.1	S_TWN	F	0:00:05.586-0:00:05.852	BL	2.27966	8	8.54016
Trial 1	1.1	S_TWN	F	0:00:05.852-0:00:06.118	BL	2.35058	8	8.80585
Trial 1	1.1	S_TWN	F	0:00:06.118-0:00:06.384	BL	1.96542	8	7.36298
Trial 1	1.1	S_TWN	F	0:00:06.384-0:00:06.650	BL	4.02112	8	15.0641
Trial 1	1.1	S_TWN	F	0:00:06.650-0:00:06.916	BL	1.35099	8	5.06113
Trial 1	1.1	S_TWN	F	0:00:06.916-0:00:07.182	BL	0.542198	8	2.03123
Trial 1	1.1	S_TWN	F	0:00:07.182-0:00:07.448	BL	0.733917	8	2.74943
Trial 1	1.1	S_TWN	F	0:00:07.448-0:00:07.714	BL	1.68541	8	6.314
Trial 1	1.1	S_TWN	F	0:00:07.714-0:00:07.980	BL	2.43337	8	9.116
Trial 1	1.1	S_TWN	F	0:00:07.980-0:00:08.246	BL	1.09392	8	4.0981
Trial 1	1.1	S_TWN	F	0:00:08.246-0:00:08.512	BL	1.8489	8	6.9264
Trial 1	1.1	S_TWN	F	0:00:08.512-0:00:08.778	BL	1.34296	8	5.03103
Trial 1	1.1	S_TWN	F	0:00:08.778-0:00:09.044	BL	1.09096	8	4.08702
Trial 1	1.1	S_TWN	F	0:00:09.044-0:00:09.310	BL	1.19577	8	4.47966
Trial 1	1.1	S_TWN	F	0:00:09.310-0:00:09.576	BL	1.08873	7	4.66132
Trial 1	1.1	S_TWN	F	0:00:09.576-0:00:09.842	BL	1.6616	8	6.22479
Trial 1	1.1	S_TWN	F	0:00:09.842-0:00:10.108	BL	1.663	8	6.23
Trial 1	1.1	S_TWN	F	0:00:10.108-0:00:10.374	BL	0.697241	8	2.61204
Trial 1	1.1	S_TWN	F	0:00:10.374-0:00:10.640	BL	1.2014	8	4.50076
Trial 1	1.1	S_TWN	F	0:00:10.640-0:00:10.906	BL	2.69442	8	10.0939
Trial 1	1.1	S_TWN	F	0:00:10.906-0:00:11.172	BL	0.991726	8	3.71526
Trial 1	1.1	S_TWN	F	0:00:11.172-0:00:11.438	BL	1.49835	8	5.61318
Trial 1	1.1	S_TWN	F	0:00:11.438-0:00:11.704	BL	0.572708	8	2.14549
Trial 1	1.1	S_TWN	F	0:00:11.704-0:00:11.970	BL	2.75068	8	10.3047
Trial 1	1.1	S_TWN	F	0:00:11.970-0:00:12.236	BL	2.6808	8	10.0429
Trial 1	1.1	S_TWN	F	0:00:12.236-0:00:12.502	BL	3.7335	8	13.9867
Trial 1	1.1	S_TWN	F	0:00:12.502-0:00:12.768	BL	3.41193	8	12.7819
Trial 1	1.1	S_TWN	F	0:00:12.768-0:00:13.034	BL	1.09754	8	4.11164
Trial 1	1.1	S_TWN	F	0:00:13.034-0:00:13.300	BL	1.36644	8	5.11904
Trial 1	1.1	S_TWN	F	0:00:13.300-0:00:13.566	BL	0.275511	8	1.03213
Trial 1	1.1	S_TWN	F	0:00:13.566-0:00:13.832	BL	0.14191	8	0.531634
Trial 1	1.1	S_TWN	F	0:00:13.832-0:00:14.098	BL	0.304853	8	1.14205
Trial 1	1.1	S_TWN	F	0:00:14.098-0:00:14.364	BL	0.383332	8	1.43606
Trial 1	1.1	S_TWN	F	0:00:14.364-0:00:14.630	BL	0.171995	8	0.644338
Trial 1	1.1	S_TWN	F	0:00:14.630-0:00:14.896	BL	0.13964	8	0.523126
Trial 1	1.1	S_TWN	F	0:00:14.896-0:00:15.162	BL	1.47678	8	5.53242
Trial 1	1.1	S_TWN	F	0:00:15.162-0:00:15.428	BL	3.35414	8	12.5654
Trial 1	1.1	S_TWN	F	0:00:15.428-0:00:15.694	BL	0.882383	8	3.30562
Trial 1	1.1	S_TWN	F	0:00:15.694-0:00:15.960	BL	1.52542	8	5.71462
Trial 1	1.1	S_TWN	F	0:00:15.960-0:00:16.226	BL	2.28155	8	8.54723
Trial 1	1.1	S_TWN	F	0:00:16.226-0:00:16.492	BL	1.07734	8	4.03601
Trial 1	1.1	S_TWN	F	0:00:16.492-0:00:16.758	BL	0.385483	8	1.44411
Trial 1	1.1	S_TWN	F	0:00:16.758-0:00:17.024	BL	1.55307	8	5.81817
Trial 1	1.1	S_TWN	F	0:00:17.024-0:00:17.290	BL	2.04253	8	7.65183
Trial 1	1.1	S_TWN	F	0:00:17.290-0:00:17.556	BL	0.514225	8	1.92641
Trial 1	1.1	S_TWN	F	0:00:17.556-0:00:17.822	BL	1.79242	8	6.71488
Trial 1	1.1	S_TWN	F	0:00:17.822-0:00:18.088	BL	1.18578	8	4.44223
Trial 1	1.1	S_TWN	F	0:00:18.088-0:00:18.354	BL	0.32805	8	1.22895
Trial 1	1.1	S_TWN	F	0:00:18.354-0:00:18.620	BL	0.223474	8	0.837191
Trial 1	1.1	S_TWN	F	0:00:18.620-0:00:18.886	BL	0.520605	8	1.95031
Trial 1	1.1	S_TWN	F	0:00:18.886-0:00:19.152	BL	0.373453	7	1.59891
Trial 1	1.1	S_TWN	F	0:00:19.152-0:00:19.418	BL	0.38977	8	1.46018
Trial 1	1.1	S_TWN	F	0:00:19.418-0:00:19.684	BL	0.29291	8	1.09732
Trial 1	1.1	S_TWN	F	0:00:19.684-0:00:19.950	BL	0.473658	8	1.77444
Trial 1	1.1	S_TWN	F	0:00:19.950-0:00:20.216	BL	0.231181	8	0.866055
Trial 1	1.1	S_TWN	F	0:00:20.216-0:00:20.482	BL	0.280634	8	1.05133
Trial 1	1.1	S_TWN	F	0:00:20.482-0:00:20.748	BL	0.508645	8	1.90551
Trial 1	1.1	S_TWN	F	0:00:20.748-0:00:21.014	BL	0.267335	8	1.0015
Trial 1	1.1	S_TWN	F	0:00:21.014-0:00:21.280	BL	0.34236	8	1.28257
Trial 1	1.1	S_TWN	F	0:00:21.280-0:00:21.546	BL	0.301588	8	1.12982
Trial 1	1.1	S_TWN	F	0:00:21.546-0:00:21.812	BL	0.18064	8	0.67672
Trial 1	1.1	S_TWN	F	0:00:21.812-0:00:22.078	BL	0.474183	8	1.77641
Trial 1	1.1	S_TWN	F	0:00:22.078-0:00:22.344	BL	0.957254	8	3.58613
Trial 1	1.1	S_TWN	F	0:00:22.344-0:00:22.610	BL	0.271289	8	1.01632
Trial 1	1.1	S_TWN	F	0:00:22.610-0:00:22.876	BL	0.279849	8	1.04838
Trial 1	1.1	S_TWN	F	0:00:22.876-0:00:23.142	BL	0.356732	8	1.33641
Trial 1	1.1	S_TWN	F	0:00:23.142-0:00:23.408	BL	0.978728	8	3.66656
Trial 1	1.1	S_TWN	F	0:00:23.408-0:00:23.674	BL	1.18227	8	4.42907
Trial 1	1.1	S_TWN	F	0:00:23.674-0:00:23.940	BL	1.29974	8	4.86917
Trial 1	1.1	S_TWN	F	0:00:23.940-0:00:24.206	BL	0.666641	8	2.4974
Trial 1	1.1	S_TWN	F	0:00:24.206-0:00:24.472	BL	2.37651	8	8.90298
Trial 1	1.1	S_TWN	F	0:00:24.472-0:00:24.738	BL	1.22649	8	4.59473
Trial 1	1.1	S_TWN	F	0:00:24.738-0:00:25.004	BL	0.567058	8	2.12434
Trial 1	1.1	S_TWN	F	0:00:25.004-0:00:25.270	BL	0.666673	8	2.49753
Trial 1	1.1	S_TWN	F	0:00:25.270-0:00:25.536	BL	2.63566	8	9.87383
Trial 1	1.1	S_TWN	F	0:00:25.536-0:00:25.802	BL	1.22143	8	4.57576
Trial 1	1.1	S_TWN	F	0:00:25.802-0:00:26.068	BL	0.462921	8	1.73424
Trial 1	1.1	S_TWN	F	0:00:26.068-0:00:26.334	BL	0.205056	8	0.76819
Trial 1	1.1	S_TWN	F	0:00:26.334-0:00:26.600	BL	0.328095	8	1.22913
Trial 1	1.1	S_TWN	F	0:00:26.600-0:00:26.866	BL	0.556215	8	2.08371
Trial 1	1.1	S_TWN	F	0:00:26.866-0:00:27.132	BL	0.38391	8	1.43822
Trial 1	1.1	S_TWN	F	0:00:27.132-0:00:27.398	BL	0.305693	8	1.14521
Trial 1	1.1	S_TWN	F	0:00:27.398-0:00:27.664	BL	0.160986	8	0.603095
Trial 1	1.1	S_TWN	F	0:00:27.664-0:00:27.930	BL	0.183514	8	0.687486
Trial 1	1.1	S_TWN	F	0:00:27.930-0:00:28.196	BL	0.107516	8	0.402781
Trial 1	1.1	S_TWN	F	0:00:28.196-0:00:28.462	BL	0.424325	8	1.58963
Trial 1	1.1	S_TWN	F	0:00:28.462-0:00:28.728	BL	0.377097	7	1.61451
Trial 1	1.1	S_TWN	F	0:00:28.728-0:00:28.994	BL	0.792374	8	2.96844
Trial 1	1.1	S_TWN	F	0:00:28.994-0:00:29.260	BL	2.45799	8	9.20821
Trial 1	1.1	S_TWN	F	0:00:29.260-0:00:29.526	BL	2.77783	8	10.4065
Trial 1	1.1	S_TWN	F	0:00:29.526-0:00:29.792	BL	2.81016	8	10.5276
Trial 1	1.1	S_TWN	F	0:00:29.792-0:00:30.058	BL	4.15532	8	15.5669
Trial 1	1.1	S_TWN	F	0:00:30.058-0:00:30.324	BL	3.84911	8	14.4198
Trial 1	1.1	S_TWN	F	0:00:30.324-0:00:30.590	BL	3.21782	8	12.0547
Trial 1	1.1	S_TWN	F	0:00:30.590-0:00:30.856	BL	0.817175	8	3.06136
Trial 1	1.1	S_TWN	F	0:00:30.856-0:00:31.122	BL	1.52984	8	5.73115
Trial 1	1.1	S_TWN	F	0:00:31.122-0:00:31.388	BL	1.65445	8	6.19801
Trial 1	1.1	S_TWN	F	0:00:31.388-0:00:31.654	BL	1.93812	8	7.26071
Trial 1	1.1	S_TWN	F	0:00:31.654-0:00:31.920	BL	1.65636	8	6.20512
Trial 1	1.1	S_TWN	F	0:00:31.920-0:00:32.186	BL	0.635985	8	2.38258
Trial 1	1.1	S_TWN	F	0:00:32.186-0:00:32.452	BL	1.31712	8	4.93428
Trial 1	1.1	S_TWN	F	0:00:32.452-0:00:32.718	BL	1.05983	8	3.97039
Trial 1	1.1	S_TWN	F	0:00:32.718-0:00:32.984	BL	0.156414	8	0.58597
Trial 1	1.1	S_TWN	F	0:00:32.984-0:00:33.250	BL	0.0900044	8	0.337178
Trial 1	1.1	S_TWN	F	0:00:33.250-0:00:33.516	BL	0.326631	8	1.22364
Trial 1	1.1	S_TWN	F	0:00:33.516-0:00:33.782	BL	0.204512	8	0.766152
Trial 1	1.1	S_TWN	F	0:00:33.782-0:00:34.048	BL	0.128899	8	0.482887
Trial 1	1.1	S_TWN	F	0:00:34.048-0:00:34.314	BL	0.127718	8	0.478465
Trial 1	1.1	S_TWN	F	0:00:34.314-0:00:34.580	BL	0.162831	8	0.610005
Trial 1	1.1	S_TWN	F	0:00:34.580-0:00:34.846	BL	0.361451	8	1.3541
Trial 1	1.1	S_TWN	F	0:00:34.846-0:00:35.112	BL	0.536125	8	2.00846
Trial 1	1.1	S_TWN	F	0:00:35.112-0:00:35.378	BL	1.01726	8	3.81091
Trial 1	1.1	S_TWN	F	0:00:35.378-0:00:35.644	BL	0.712959	8	2.67093
Trial 1	1.1	S_TWN	F	0:00:35.644-0:00:35.910	BL	0.714731	8	2.67756
Trial 1	1.1	S_TWN	F	0:00:35.910-0:00:36.176	BL	1.48885	8	5.5776
Trial 1	1.1	S_TWN	F	0:00:36.176-0:00:36.442	BL	0.988648	8	3.70371
Trial 1	1.1	S_TWN	F	0:00:36.442-0:00:36.708	BL	0.233083	8	0.873189
Trial 1	1.1	S_TWN	F	0:00:36.708-0:00:36.974	BL	0.260807	8	0.977042
Trial 1	1.1	S_TWN	F	0:00:36.974-0:00:37.240	BL	0.683842	8	2.56184
Trial 1	1.1	S_TWN	F	0:00:37.240-0:00:37.506	BL	0.889002	8	3.33043
Trial 1	1.1	S_TWN	F	0:00:37.506-0:00:37.772	BL	0.867908	8	3.25139
Trial 1	1.1	S_TWN	F	0:00:37.772-0:00:38.038	BL	0.917917	7	3.93
Trial 1	1.1	S_TWN	F	0:00:38.038-0:00:38.304	BL	1.6584	8	6.21282
Trial 1	1.1	S_TWN	F	0:00:38.304-0:00:38.570	BL	1.0653	8	3.99088
Trial 1	1.1	S_TWN	F	0:00:38.570-0:00:38.836	BL	0.553165	8	2.07229
Trial 1	1.1	S_TWN	F	0:00:38.836-0:00:39.102	BL	0.36816	8	1.37922
Trial 1	1.1	S_TWN	F	0:00:39.102-0:00:39.368	BL	0.554845	8	2.07858
Trial 1	1.1	S_TWN	F	0:00:39.368-0:00:39.634	BL	0.264723	8	0.99172
Trial 1	1.1	S_TWN	F	0:00:39.634-0:00:39.900	BL	0.207682	8	0.778029
Trial 1	1.1	S_TWN	F	0:00:39.900-0:00:40.166	BL	0.184689	8	0.69189
Trial 1	1.1	S_TWN	F	0:00:40.166-0:00:40.432	BL	0.142991	8	0.53568
Trial 1	1.1	S_TWN	F	0:00:40.432-0:00:40.698	BL	0.275465	8	1.03196
Trial 1	1.1	S_TWN	F	0:00:40.698-0:00:40.964	BL	0.160822	8	0.60248
Trial 1	1.1	S_TWN	F	0:00:40.964-0:00:41.230	BL	0.0889434	8	0.333204
Trial 1	1.1	S_TWN	F	0:00:41.230-0:00:41.496	BL	0.0651185	8	0.24395
Trial 1	1.1	S_TWN	F	0:00:41.496-0:00:41.762	BL	0.117938	8	0.441826
Trial 1	1.1	S_TWN	F	0:00:41.762-0:00:42.028	BL	0.0776911	8	0.291049
Trial 1	1.1	S_TWN	F	0:00:42.028-0:00:42.294	BL	0.149516	8	0.560127
Trial 1	1.1	S_TWN	F	0:00:42.294-0:00:42.560	BL	0.0686524	8	0.257188
Trial 1	1.1	S_TWN	F	0:00:42.560-0:00:42.826	BL	0.139189	8	0.52144
Trial 1	1.1	S_TWN	F	0:00:42.826-0:00:43.092	BL	0.172693	8	0.646952
Trial 1	1.1	S_TWN	F	0:00:43.092-0:00:43.358	BL	0.133595	8	0.500481
Trial 1	1.1	S_TWN	F	0:00:43.358-0:00:43.624	BL	0.0647873	8	0.24271
Trial 1	1.1	S_TWN	F	0:00:43.624-0:00:43.890	BL	0.164314	8	0.615561
Trial 1	1.1	S_TWN	F	0:00:43.890-0:00:44.156	BL	0.194966	8	0.730388
Trial 1	1.1	S_TWN	F	0:00:44.156-0:00:44.422	BL	0.127208	8	0.476555
Trial 1	1.1	S_TWN	F	0:00:44.422-0:00:44.688	BL	0.107641	8	0.403248
Trial 1	1.1	S_TWN	F	0:00:44.688-0:00:44.954	BL	0.169886	8	0.636437
Trial 1	1.1	S_TWN	F	0:00:44.954-0:00:45.220	BL	0.168785	8	0.63231
Trial 1	1.1	S_TWN	F	0:00:45.220-0:00:45.486	BL	0.185031	8	0.69317
Trial 1	1.1	S_TWN	F	0:00:45.486-0:00:45.752	BL	0.121902	8	0.456676
Trial 1	1.1	S_TWN	F	0:00:45.752-0:00:46.018	BL	0.137376	8	0.514642
Trial 1	1.1	S_TWN	F	0:00:46.018-0:00:46.284	BL	0.153281	8	0.574233
Trial 1	1.1	S_TWN	F	0:00:46.284-0:00:46.550	BL	0.148057	8	0.554659
Trial 1	1.1	S_TWN	F	0:00:46.550-0:00:46.816	BL	0.225745	8	0.845697
Trial 1	1.1	S_TWN	F	0:00:46.816-0:00:47.082	BL	0.157737	8	0.590927
Trial 1	1.1	S_TWN	F	0:00:47.082-0:00:47.348	BL	0.266243	8	0.997412
Trial 1	1.1	S_TWN	F	0:00:47.348-0:00:47.614	BL	0.165547	7	0.708784
Trial 1	1.1	S_TWN	F	0:00:47.614-0:00:47.880	BL	0.152505	8	0.571321
Trial 1	1.1	S_TWN	F	0:00:47.880-0:00:48.146	BL	0.255994	8	0.959021
Trial 1	1.1	S_TWN	F	0:00:48.146-0:00:48.412	BL	0.325444	8	1.21919
Trial 1	1.1	S_TWN	F	0:00:48.412-0:00:48.678	BL	0.225802	8	0.845913
Trial 1	1.1	S_TWN	F	0:00:48.678-0:00:48.944	BL	0.327266	8	1.22602
Trial 1	1.1	S_TWN	F	0:00:48.944-0:00:49.210	BL	0.202932	8	0.760236
Trial 1	1.1	S_TWN	F	0:00:49.210-0:00:49.476	BL	0.156866	8	0.587656
Trial 1	1.1	S_TWN	F	0:00:49.476-0:00:49.742	BL	0.256352	8	0.960357
Trial 1	1.1	S_TWN	F	0:00:49.742-0:00:50.008	BL	0.170821	8	0.639939
Trial 1	1.1	S_TWN	F	0:00:50.008-0:00:50.274	BL	0.358552	8	1.34322
Trial 1	1.1	S_TWN	F	0:00:50.274-0:00:50.540	BL	1.06299	8	3.98225
Trial 1	1.1	S_TWN	F	0:00:50.540-0:00:50.806	BL	0.813944	8	3.04924
Trial 1	1.1	S_TWN	F	0:00:50.806-0:00:51.072	BL	0.310569	8	1.16347
Trial 1	1.1	S_TWN	F	0:00:51.072-0:00:51.338	BL	0.355782	8	1.33284
Trial 1	1.1	S_TWN	F	0:00:51.338-0:00:51.604	BL	1.04854	8	3.92807
Trial 1	1.1	S_TWN	F	0:00:51.604-0:00:51.870	BL	0.36204	8	1.35629
Trial 1	1.1	S_TWN	F	0:00:51.870-0:00:52.136	BL	0.592074	8	2.21805
Trial 1	1.1	S_TWN	F	0:00:52.136-0:00:52.402	BL	0.306364	8	1.14772
Trial 1	1.1	S_TWN	F	0:00:52.402-0:00:52.668	BL	0.291003	8	1.09017
Trial 1	1.1	S_TWN	F	0:00:52.668-0:00:52.934	BL	1.95452	8	7.3221
Trial 1	1.1	S_TWN	F	0:00:52.934-0:00:53.200	BL	0.808313	8	3.02815
Trial 1	1.1	S_TWN	F	0:00:53.200-0:00:53.466	BL	0.174928	8	0.655325
Trial 1	1.1	S_TWN	F	0:00:53.466-0:00:53.732	BL	0.650248	8	2.43598
Trial 1	1.1	S_TWN	F	0:00:53.732-0:00:53.998	BL	1.25421	8	4.6986
Trial 1	1.1	S_TWN	F	0:00:53.998-0:00:54.264	BL	0.259699	8	0.972899
Trial 1	1.1	S_TWN	F	0:00:54.264-0:00:54.530	BL	1.54437	8	5.78561
Trial 1	1.1	S_TWN	F	0:00:54.530-0:00:54.796	BL	2.89939	8	10.8618
Trial 1	1.1	S_TWN	F	0:00:54.796-0:00:55.062	BL	2.32195	8	8.69858
Trial 1	1.1	S_TWN	F	0:00:55.062-0:00:55.328	BL	1.16991	8	4.38278
Trial 1	1.1	S_TWN	F	0:00:55.328-0:00:55.594	BL	0.192612	8	0.721569
Trial 1	1.1	S_TWN	F	0:00:55.594-0:00:55.860	BL	0.290067	8	1.08666
Trial 1	1.1	S_TWN	F	0:00:55.860-0:00:56.126	BL	1.19937	8	4.49315
Trial 1	1.1	S_TWN	F	0:00:56.126-0:00:56.392	BL	0.595447	8	2.23069
Trial 1	1.1	S_TWN	F	0:00:56.392-0:00:56.658	BL	0.747678	8	2.80099
Trial 1	1.1	S_TWN	F	0:00:56.658-0:00:56.924	BL	2.59353	8	9.716
Trial 1	1.1	S_TWN	F	0:00:56.924-0:00:57.190	BL	1.41139	7	6.04276
Trial 1	1.1	S_TWN	F	0:00:57.190-0:00:57.456	BL	0.493044	8	1.84708
Trial 1	1.1	S_TWN	F	0:00:57.456-0:00:57.722	BL	2.41221	8	9.03671
Trial 1	1.1	S_TWN	F	0:00:57.722-0:00:57.988	BL	1.74599	8	6.54094
Trial 1	1.1	S_TWN	F	0:00:57.988-0:00:58.254	BL	0.650426	8	2.43665
Trial 1	1.1	S_TWN	F	0:00:58.254-0:00:58.520	BL	1.2801	8	4.79554
Trial 1	1.1	S_TWN	F	0:00:58.520-0:00:58.786	BL	1.09513	8	4.10265
Trial 1	1.1	S_TWN	F	0:00:58.786-0:00:59.052	BL	0.797156	8	2.98635
Trial 1	1.1	S_TWN	F	0:00:59.052-0:00:59.318	BL	0.546219	8	2.04627
Trial 1	1.1	S_TWN	F	0:00:59.318-0:00:59.584	BL	0.601973	8	2.25514
Trial 1	1.1	S_TWN	F	0:00:59.584-0:00:59.850	BL	0.246816	8	0.924636
Trial 1	1.1	S_TWN	F	0:00:59.850-0:01:00.116	BL	0.320128	8	1.19928
Trial 1	1.1	S_TWN	F	0:01:00.116-0:01:00.382	BL	0.823129	8	3.08364
Trial 1	1.1	S_TWN	F	0:01:00.382-0:01:00.648	BL	1.38566	8	5.19106
Trial 1	1.1	S_TWN	F	0:01:00.648-0:01:00.914	BL	0.485418	8	1.8185
Trial 1	1.1	S_TWN	F	0:01:00.914-0:01:01.180	BL	0.738505	8	2.76661
Trial 1	1.1	S_TWN	F	0:01:01.180-0:01:01.446	BL	1.27285	8	4.76842
Trial 1	1.1	S_TWN	F	0:01:01.446-0:01:01.712	BL	0.731321	8	2.73971
Trial 1	1.1	S_TWN	F	0:01:01.712-0:01:01.978	BL	0.334466	8	1.253
Trial 1	1.1	S_TWN	F	0:01:01.978-0:01:02.244	BL	0.57474	8	2.15312
Trial 1	1.1	S_TWN	F	0:01:02.244-0:01:02.510	BL	2.56392	8	9.60506
Trial 1	1.1	S_TWN	F	0:01:02.510-0:01:02.776	BL	7.29827	8	27.3412
Trial 1	1.1	S_TWN	F	0:01:02.776-0:01:03.042	BL	5.84715	8	21.9049
Trial 1	1.1	S_TWN	F	0:01:03.042-0:01:03.308	BL	4.40645	8	16.5077
Trial 1	1.1	S_TWN	F	0:01:03.308-0:01:03.574	BL	0.708381	8	2.65376
Trial 1	1.1	S_TWN	F	0:01:03.574-0:01:03.840	BL	1.45543	8	5.45239
Trial 1	1.1	S_TWN	F	0:01:03.840-0:01:04.106	BL	0.70601	8	2.6449
Trial 1	1.1	S_TWN	F	0:01:04.106-0:01:04.372	BL	0.480601	8	1.80045
Trial 1	1.1	S_TWN	F	0:01:04.372-0:01:04.638	BL	0.645862	8	2.41957
Trial 1	1.1	S_TWN	F	0:01:04.638-0:01:04.904	BL	0.322627	8	1.20864
Trial 1	1.1	S_TWN	F	0:01:04.904-0:01:05.170	BL	0.187373	8	0.701945
Trial 1	1.1	S_TWN	F	0:01:05.170-0:01:05.436	BL	0.299574	8	1.12229
Trial 1	1.1	S_TWN	F	0:01:05.436-0:01:05.702	BL	0.640216	8	2.39841
Trial 1	1.1	S_TWN	F	0:01:05.702-0:01:05.968	BL	1.0394	8	3.89384
Trial 1	1.1	S_TWN	F	0:01:05.968-0:01:06.234	BL	1.00931	8	3.78114
Trial 1	1.1	S_TWN	F	0:01:06.234-0:01:06.500	BL	0.725935	8	2.71953
Trial 1	1.1	S_TWN	F	0:01:06.500-0:01:06.766	BL	1.93803	7	8.29752
Trial 1	1.1	S_TWN	F	0:01:06.766-0:01:07.032	BL	0.904841	8	3.38978
Trial 1	1.1	S_TWN	F	0:01:07.032-0:01:07.298	BL	0.362689	8	1.35872
Trial 1	1.1	S_TWN	F	0:01:07.298-0:01:07.564	BL	1.84192	8	6.90031
Trial 1	1.1	S_TWN	F	0:01:07.564-0:01:07.830	BL	0.745518	8	2.79288
Trial 1	1.1	S_TWN	F	0:01:07.830-0:01:08.096	BL	2.10959	8	7.90304
Trial 1	1.1	S_TWN	F	0:01:08.096-0:01:08.362	BL	0.950931	8	3.56244
Trial 1	1.1	S_TWN	F	0:01:08.362-0:01:08.628	BL	0.285491	8	1.06951
Trial 1	1.1	S_TWN	F	0:01:08.628-0:01:08.894	BL	1.98694	8	7.44358
Trial 1	1.1	S_TWN	F	0:01:08.894-0:01:09.160	BL	1.94613	8	7.2907
Trial 1	1.1	S_TWN	F	0:01:09.160-0:01:09.426	BL	0.885717	8	3.31812
Trial 1	1.1	S_TWN	F	0:01:09.426-0:01:09.692	BL	3.01484	8	11.2943
Trial 1	1.1	S_TWN	F	0:01:09.692-0:01:09.958	BL	4.88878	8	18.3146
Trial 1	1.1	S_TWN	F	0:01:09.958-0:01:10.224	BL	1.97748	8	7.40817
Trial 1	1.1	S_TWN	F	0:01:10.224-0:01:10.490	BL	0.404749	8	1.51629
Trial 1	1.1	S_TWN	F	0:01:10.490-0:01:10.756	BL	0.218875	8	0.819957
Trial 1	1.1	S_TWN	F	0:01:10.756-0:01:11.022	BL	0.286564	8	1.07354
Trial 1	1.1	S_TWN	F	0:01:11.022-0:01:11.288	BL	0.200682	8	0.751803
Trial 1	1.1	S_TWN	F	0:01:11.288-0:01:11.554	BL	0.443925	8	1.66305
Trial 1	1.1	S_TWN	F	0:01:11.554-0:01:11.820	BL	1.05678	8	3.95898
Trial 1	1.1	S_TWN	F	0:01:11.820-0:01:12.086	BL	1.80242	8	6.75232
Trial 1	1.1	S_TWN	F	0:01:12.086-0:01:12.352	BL	1.10008	8	4.1212
Trial 1	1.1	S_TWN	F	0:01:12.352-0:01:12.618	BL	1.06104	8	3.97493
Trial 1	1.1	S_TWN	F	0:01:12.618-0:01:12.884	BL	0.700635	8	2.62476
Trial 1	1.1	S_TWN	F	0:01:12.884-0:01:13.150	BL	2.87389	8	10.7663
Trial 1	1.1	S_TWN	F	0:01:13.150-0:01:13.416	BL	1.07506	8	4.02741
Trial 1	1.1	S_TWN	F	0:01:13.416-0:01:13.682	BL	1.61637	8	6.05536
Trial 1	1.1	S_TWN	F	0:01:13.682-0:01:13.948	BL	0.537936	8	2.01524
Trial 1	1.1	S_TWN	F	0:01:13.948-0:01:14.214	BL	2.50597	8	9.38798
Trial 1	1.1	S_TWN	F	0:01:14.214-0:01:14.480	BL	2.07532	8	7.77466
Trial 1	1.1	S_TWN	F	0:01:14.480-0:01:14.746	BL	0.376483	8	1.41039
Trial 1	1.1	S_TWN	F	0:01:14.746-0:01:15.012	BL	0.430028	8	1.611
Trial 1	1.1	S_TWN	F	0:01:15.012-0:01:15.278	BL	0.26278	8	0.984434
Trial 1	1.1	S_TWN	F	0:01:15.278-0:01:15.544	BL	0.224557	8	0.84125
Trial 1	1.1	S_TWN	F	0:01:15.544-0:01:15.810	BL	0.235491	8	0.88221
Trial 1	1.1	S_TWN	F	0:01:15.810-0:01:16.076	BL	0.530277	7	2.27034
Trial 1	1.1	S_TWN	F	0:01:16.076-0:01:16.342	BL	0.634134	8	2.37563
Trial 1	1.1	S_TWN	F	0:01:16.342-0:01:16.608	BL	0.267242	8	1.00115
Trial 1	1.1	S_TWN	F	0:01:16.608-0:01:16.874	BL	2.49845	8	9.35987
Trial 1	1.1	S_TWN	F	0:01:16.874-0:01:17.140	BL	0.730711	8	2.73743
Trial 1	1.1	S_TWN	F	0:01:17.140-0:01:17.406	BL	0.347584	8	1.30214
Trial 1	1.1	S_TWN	F	0:01:17.406-0:01:17.672	BL	0.390929	8	1.46452
Trial 1	1.1	S_TWN	F	0:01:17.672-0:01:17.938	BL	2.63993	8	9.88981
Trial 1	1.1	S_TWN	F	0:01:17.938-0:01:18.204	BL	1.59256	8	5.9661
Trial 1	1.1	S_TWN	F	0:01:18.204-0:01:18.470	BL	1.39862	8	5.23959
Trial 1	1.1	S_TWN	F	0:01:18.470-0:01:18.736	BL	0.613391	8	2.29792
Trial 1	1.1	S_TWN	F	0:01:18.736-0:01:19.002	BL	0.317247	8	1.18849
Trial 1	1.1	S_TWN	F	0:01:19.002-0:01:19.268	BL	1.31167	8	4.91384
Trial 1	1.1	S_TWN	F	0:01:19.268-0:01:19.534	BL	0.926565	8	3.47114
Trial 1	1.1	S_TWN	F	0:01:19.534-0:01:19.800	BL	0.630106	8	2.36054
Trial 1	1.1	S_TWN	F	0:01:19.800-0:01:20.066	BL	0.613	8	2.29646
Trial 1	1.1	S_TWN	F	0:01:20.066-0:01:20.332	BL	0.307027	8	1.1502
Trial 1	1.1	S_TWN	F	0:01:20.332-0:01:20.598	BL	0.291341	8	1.09143
Trial 1	1.1	S_TWN	F	0:01:20.598-0:01:20.864	BL	0.360879	8	1.35194
Trial 1	1.1	S_TWN	F	0:01:20.864-0:01:21.130	BL	0.581842	8	2.17973
Trial 1	1.1	S_TWN	F	0:01:21.130-0:01:21.396	BL	1.22182	8	4.57723
Trial 1	1.1	S_TWN	F	0:01:21.396-0:01:21.662	BL	0.857895	8	3.21389
Trial 1	1.1	S_TWN	F	0:01:21.662-0:01:21.928	BL	0.870607	8	3.26151
Trial 1	1.1	S_TWN	F	0:01:21.928-0:01:22.194	BL	1.18684	8	4.44619
Trial 1	1.1	S_TWN	F	0:01:22.194-0:01:22.460	BL	1.1059	8	4.14299
Trial 1	1.1	S_TWN	F	0:01:22.460-0:01:22.726	BL	1.34011	8	5.0204
Trial 1	1.1	S_TWN	F	0:01:22.726-0:01:22.992	BL	0.858716	8	3.21699
Trial 1	1.1	S_TWN	F	0:01:22.992-0:01:23.258	BL	4.07886	8	15.2804
Trial 1	1.1	S_TWN	F	0:01:23.258-0:01:23.524	BL	1.81341	8	6.79348
Trial 1	1.1	S_TWN	F	0:01:23.524-0:01:23.790	BL	0.550944	8	2.06399
Trial 1	1.1	S_TWN	F	0:01:23.790-0:01:24.056	BL	0.978738	8	3.66659
Trial 1	1.1	S_TWN	F	0:01:24.056-0:01:24.322	BL	0.885415	8	3.317
Trial 1	1.1	S_TWN	F	0:01:24.322-0:01:24.588	BL	1.30795	8	4.89992
Trial 1	1.1	S_TWN	F	0:01:24.588-0:01:24.854	BL	5.81431	8	21.7818
Trial 1	1.1	S_TWN	F	0:01:24.854-0:01:25.120	BL	4.47349	8	16.7589
Trial 1	1.1	S_TWN	F	0:01:25.120-0:01:25.386	BL	4.90894	8	18.3901
Trial 1	1.1	S_TWN	F	0:01:25.386-0:01:25.652	BL	1.65262	7	7.07556
Trial 1	1.1	S_TWN	F	0:01:25.652-0:01:25.918	BL	0.347159	8	1.30055
Trial 1	1.1	S_TWN	F	0:01:25.918-0:01:26.184	BL	1.66602	8	6.2413
Trial 1	1.1	S_TWN	F	0:01:26.184-0:01:26.450	BL	0.909995	8	3.40907
Trial 1	1.1	S_TWN	F	0:01:26.450-0:01:26.716	BL	1.3264	8	4.96907
Trial 1	1.1	S_TWN	F	0:01:26.716-0:01:26.982	BL	2.02465	8	7.58483
Trial 1	1.1	S_TWN	F	0:01:26.982-0:01:27.248	BL	2.16052	8	8.09387
Trial 1	1.1	S_TWN	F	0:01:27.248-0:01:27.514	BL	2.01257	8	7.53959
Trial 1	1.1	S_TWN	F	0:01:27.514-0:01:27.780	BL	1.83581	8	6.87741
Trial 1	1.1	S_TWN	F	0:01:27.780-0:01:28.046	BL	0.501252	8	1.87782
Trial 1	1.1	S_TWN	F	0:01:28.046-0:01:28.312	BL	0.68718	8	2.57433
Trial 1	1.1	S_TWN	F	0:01:28.312-0:01:28.578	BL	0.696171	8	2.60803
Trial 1	1.1	S_TWN	F	0:01:28.578-0:01:28.844	BL	0.299289	8	1.12121
Trial 1	1.1	S_TWN	F	0:01:28.844-0:01:29.110	BL	1.35133	8	5.0624
Trial 1	1.1	S_TWN	F	0:01:29.110-0:01:29.376	BL	1.90546	8	7.13836
Trial 1	1.1	S_TWN	F	0:01:29.376-0:01:29.642	BL	1.25087	8	4.68608
Trial 1	1.1	S_TWN	F	0:01:29.642-0:01:29.908	BL	0.974209	8	3.64964
Trial 1	1.1	S_TWN	F	0:01:29.908-0:01:30.174	BL	1.14863	8	4.30303
Trial 1	1.1	S_TWN	F	0:01:30.174-0:01:30.440	BL	1.24012	8	4.6458
Trial 1	1.1	S_TWN	F	0:01:30.440-0:01:30.706	BL	0.719126	8	2.69403
Trial 1	1.1	S_TWN	F	0:01:30.706-0:01:30.972	BL	2.26316	8	8.47835
Trial 1	1.1	S_TWN	F	0:01:30.972-0:01:31.238	BL	2.25216	8	8.43714
Trial 1	1.1	S_TWN	F	0:01:31.238-0:01:31.504	BL	0.653546	8	2.44834
Trial 1	1.1	S_TWN	F	0:01:31.504-0:01:31.770	BL	2.60574	8	9.76172
Trial 1	1.1	S_TWN	F	0:01:31.770-0:01:32.036	BL	2.4712	8	9.25775
Trial 1	1.1	S_TWN	F	0:01:32.036-0:01:32.302	BL	1.12516	8	4.21513
Trial 1	1.1	S_TWN	F	0:01:32.302-0:01:32.568	BL	1.22998	8	4.60783
Trial 1	1.1	S_TWN	F	0:01:32.568-0:01:32.834	BL	0.146326	8	0.54817
Trial 1	1.1	S_TWN	F	0:01:32.834-0:01:33.100	BL	0.544706	8	2.0406
Trial 1	1.1	S_TWN	F	0:01:33.100-0:01:33.366	BL	1.00094	8	3.74977
Trial 1	1.1	S_TWN	F	0:01:33.366-0:01:33.632	BL	0.720103	8	2.69769
Trial 1	1.1	S_TWN	F	0:01:33.632-0:01:33.898	BL	0.587161	8	2.19966
Trial 1	1.1	S_TWN	F	0:01:33.898-0:01:34.164	BL	0.725069	8	2.71629
Trial 1	1.1	S_TWN	F	0:01:34.164-0:01:34.430	BL	0.628023	8	2.35273
Trial 1	1.1	S_TWN	F	0:01:34.430-0:01:34.696	BL	1.19735	8	4.48561
Trial 1	1.1	S_TWN	F	0:01:34.696-0:01:34.962	BL	1.34513	8	5.0392
Trial 1	1.1	S_TWN	F	0:01:34.962-0:01:35.228	BL	0.610723	7	2.61476
Trial 1	1.1	S_TWN	F	0:01:35.228-0:01:35.494	BL	0.695631	8	2.60601
Trial 1	1.1	S_TWN	F	0:01:35.494-0:01:35.760	BL	0.272697	8	1.02159
Trial 1	1.1	S_TWN	F	0:01:35.760-0:01:36.026	BL	0.301285	8	1.1287
Trial 1	1.1	S_TWN	F	0:01:36.026-0:01:36.292	BL	0.689842	8	2.58431
Trial 1	1.1	S_TWN	F	0:01:36.292-0:01:36.558	BL	0.470149	8	1.7613
Trial 1	1.1	S_TWN	F	0:01:36.558-0:01:36.824	BL	0.706245	8	2.64578
Trial 1	1.1	S_TWN	F	0:01:36.824-0:01:37.090	BL	1.29145	8	4.8381
Trial 1	1.1	S_TWN	F	0:01:37.090-0:01:37.356	BL	1.86607	8	6.99079
Trial 1	1.1	S_TWN	F	0:01:37.356-0:01:37.622	BL	1.38181	8	5.17659
Trial 1	1.1	S_TWN	F	0:01:37.622-0:01:37.888	BL	0.637085	8	2.38667
Trial 1	1.1	S_TWN	F	0:01:37.888-0:01:38.154	BL	0.38193	8	1.43081
Trial 1	1.1	S_TWN	F	0:01:38.154-0:01:38.420	BL	0.286836	8	1.07455
Trial 1	1.1	S_TWN	F	0:01:38.420-0:01:38.686	BL	0.360225	8	1.3495
Trial 1	1.1	S_TWN	F	0:01:38.686-0:01:38.952	BL	0.747926	8	2.80192
Trial 1	1.1	S_TWN	F	0:01:38.952-0:01:39.218	BL	0.216573	8	0.811334
Trial 1	1.1	S_TWN	F	0:01:39.218-0:01:39.484	BL	0.212	8	0.79421
Trial 1	1.1	S_TWN	F	0:01:39.484-0:01:39.750	BL	0.723793	8	2.71151
Trial 1	1.1	S_TWN	F	0:01:39.750-0:01:40.016	BL	1.14607	8	4.29348
Trial 1	1.1	S_TWN	F	0:01:40.016-0:01:40.282	BL	2.58522	8	9.68489
Trial 1	1.1	S_TWN	F	0:01:40.282-0:01:40.548	BL	3.97644	8	14.8967
Trial 1	1.1	S_TWN	F	0:01:40.548-0:01:40.814	BL	4.95655	8	18.5685
Trial 1	1.1	S_TWN	F	0:01:40.814-0:01:41.080	BL	2.38422	8	8.93187
Trial 1	1.1	S_TWN	F	0:01:41.080-0:01:41.346	BL	2.27295	8	8.51504
Trial 1	1.1	S_TWN	F	0:01:41.346-0:01:41.612	BL	1.23174	8	4.61439
Trial 1	1.1	S_TWN	F	0:01:41.612-0:01:41.878	BL	0.671598	8	2.51598
Trial 1	1.1	S_TWN	F	0:01:41.878-0:01:42.144	BL	0.787931	8	2.95179
Trial 1	1.1	S_TWN	F	0:01:42.144-0:01:42.410	BL	0.613947	8	2.3
Trial 1	1.1	S_TWN	F	0:01:42.410-0:01:42.676	BL	0.843842	8	3.16125
Trial 1	1.1	S_TWN	F	0:01:42.676-0:01:42.942	BL	1.1734	8	4.39584
Trial 1	1.1	S_TWN	F	0:01:42.942-0:01:43.208	BL	0.781348	8	2.92713
Trial 1	1.1	S_TWN	F	0:01:43.208-0:01:43.474	BL	0.667588	8	2.50096
Trial 1	1.1	S_TWN	F	0:01:43.474-0:01:43.740	BL	0.451772	8	1.69245
Trial 1	1.1	S_TWN	F	0:01:43.740-0:01:44.006	BL	0.224194	8	0.839888
Trial 1	1.1	S_TWN	F	0:01:44.006-0:01:44.272	BL	0.538655	8	2.01794
Trial 1	1.1	S_TWN	F	0:01:44.272-0:01:44.538	BL	0.443133	8	1.66008
Trial 1	1.1	S_TWN	F	0:01:44.538-0:01:44.804	BL	0.266777	7	1.14218
Trial 1	1.1	S_TWN	F	0:01:44.804-0:01:45.070	BL	0.181987	8	0.681769
Trial 1	1.1	S_TWN	F	0:01:45.070-0:01:45.336	BL	0.164637	8	0.616769
Trial 1	1.1	S_TWN	F	0:01:45.336-0:01:45.602	BL	0.332425	8	1.24535
Trial 1	1.1	S_TWN	F	0:01:45.602-0:01:45.868	BL	0.642589	8	2.40731
Trial 1	1.1	S_TWN	F	0:01:45.868-0:01:46.134	BL	1.05084	8	3.93673
Trial 1	1.1	S_TWN	F	0:01:46.134-0:01:46.400	BL	1.51017	8	5.65746
Trial 1	1.1	S_TWN	F	0:01:46.400-0:01:46.666	BL	3.68528	8	13.806
Trial 1	1.1	S_TWN	F	0:01:46.666-0:01:46.932	BL	0.928317	8	3.47772
Trial 1	1.1	S_TWN	F	0:01:46.932-0:01:47.198	BL	3.7426	8	14.0207
Trial 1	1.1	S_TWN	F	0:01:47.198-0:01:47.464	BL	4.52883	8	16.9661
Trial 1	1.1	S_TWN	F	0:01:47.464-0:01:47.730	BL	2.4426	8	9.15062
Trial 1	1.1	S_TWN	F	0:01:47.730-0:01:47.996	BL	0.548549	8	2.055
Trial 1	1.1	S_TWN	F	0:01:47.996-0:01:48.262	BL	1.31079	8	4.91056
Trial 1	1.1	S_TWN	F	0:01:48.262-0:01:48.528	BL	0.69246	8	2.59412
Trial 1	1.1	S_TWN	F	0:01:48.528-0:01:48.794	BL	0.282798	8	1.05943
Trial 1	1.1	S_TWN	F	0:01:48.794-0:01:49.060	BL	0.245458	8	0.919548
Trial 1	1.1	S_TWN	F	0:01:49.060-0:01:49.326	BL	1.71168	8	6.41235
Trial 1	1.1	S_TWN	F	0:01:49.326-0:01:49.592	BL	0.79906	8	2.99348
Trial 1	1.1	S_TWN	F	0:01:49.592-0:01:49.858	BL	2.34777	8	8.79531
Trial 1	1.1	S_TWN	F	0:01:49.858-0:01:50.124	BL	4.67066	8	17.4974
Trial 1	1.1	S_TWN	F	0:01:50.124-0:01:50.390	BL	3.3539	8	12.5646
Trial 1	1.1	S_TWN	F	0:01:50.390-0:01:50.656	BL	2.26541	8	8.4868
Trial 1	1.1	S_TWN	F	0:01:50.656-0:01:50.922	BL	0.82615	8	3.09497
Trial 1	1.1	S_TWN	F	0:01:50.922-0:01:51.188	BL	0.832683	8	3.11943
Trial 1	1.1	S_TWN	F	0:01:51.188-0:01:51.454	BL	1.03631	8	3.88228
Trial 1	1.1	S_TWN	F	0:01:51.454-0:01:51.720	BL	0.317114	8	1.18799
Trial 1	1.1	S_TWN	F	0:01:51.720-0:01:51.986	BL	0.270622	8	1.01382
Trial 1	1.1	S_TWN	F	0:01:51.986-0:01:52.252	BL	0.281181	8	1.05338
Trial 1	1.1	S_TWN	F	0:01:52.252-0:01:52.518	BL	0.383996	8	1.43854
Trial 1	1.1	S_TWN	F	0:01:52.518-0:01:52.784	BL	0.307365	8	1.15146
Trial 1	1.1	S_TWN	F	0:01:52.784-0:01:53.050	BL	0.179682	8	0.673139
Trial 1	1.1	S_TWN	F	0:01:53.050-0:01:53.316	BL	0.354352	8	1.32749
Trial 1	1.1	S_TWN	F	0:01:53.316-0:01:53.582	BL	0.401492	8	1.50409
Trial 1	1.1	S_TWN	F	0:01:53.582-0:01:53.848	BL	0.218334	8	0.817933
Trial 1	1.1	S_TWN	F	0:01:53.848-0:01:54.114	BL	0.16637	7	0.712298
Trial 1	1.1	S_TWN	F	0:01:54.114-0:01:54.380	BL	0.431373	8	1.61604
Trial 1	1.1	S_TWN	F	0:01:54.380-0:01:54.646	BL	0.59067	8	2.2128
Trial 1	1.1	S_TWN	F	0:01:54.646-0:01:54.912	BL	0.318113	8	1.19172
Trial 1	1.1	S_TWN	F	0:01:54.912-0:01:55.178	BL	0.525035	8	1.96691
Trial 1	1.1	S_TWN	F	0:01:55.178-0:01:55.444	BL	1.11324	8	4.17046
Trial 1	1.1	S_TWN	F	0:01:55.444-0:01:55.710	BL	0.469345	8	1.75829
Trial 1	1.1	S_TWN	F	0:01:55.710-0:01:55.976	BL	0.925789	8	3.46822
Trial 1	1.1	S_TWN	F	0:01:55.976-0:01:56.242	BL	0.745433	8	2.79259
Trial 1	1.1	S_TWN	F	0:01:56.242-0:01:56.508	BL	0.292851	8	1.0971
Trial 1	1.1	S_TWN	F	0:01:56.508-0:01:56.774	BL	0.133643	8	0.50066
Trial 1	1.1	S_TWN	F	0:01:56.774-0:01:57.040	BL	0.269583	8	1.00993
Trial 1	1.1	S_TWN	F	0:01:57.040-0:01:57.306	BL	0.382262	8	1.43205
Trial 1	1.1	S_TWN	F	0:01:57.306-0:01:57.572	BL	0.337839	8	1.26562
Trial 1	1.1	S_TWN	F	0:01:57.572-0:01:57.838	BL	1.20782	8	4.5248
Trial 1	1.1	S_TWN	F	0:01:57.838-0:01:58.104	BL	4.16888	8	15.6176
Trial 1	1.1	S_TWN	F	0:01:58.104-0:01:58.370	BL	5.42393	8	20.3194
Trial 1	1.1	S_TWN	F	0:01:58.370-0:01:58.636	BL	4.27516	8	16.0158
Trial 1	1.1	S_TWN	F	0:01:58.636-0:01:58.902	BL	3.06146	8	11.469
Trial 1	1.1	S_TWN	F	0:01:58.902-0:01:59.168	BL	1.81954	8	6.81647
Trial 1	1.1	S_TWN	F	0:01:59.168-0:01:59.434	BL	0.315575	8	1.18222
Trial 1	1.1	S_TWN	F	0:01:59.434-0:01:59.700	BL	0.768793	8	2.88009
Trial 1	1.1	S_TWN	F	0:01:59.700-0:01:59.966	BL	0.959512	8	3.59456
Trial 1	1.1	S_TWN	F	0:01:59.966-0:02:00.232	BL	0.981957	8	3.67864
Trial 1	1.1	S_TWN	F	0:02:00.232-0:02:00.498	BL	0.314047	8	1.1765
Trial 1	1.1	S_TWN	F	0:02:00.498-0:02:00.764	BL	0.220474	8	0.82595
Trial 1	1.1	S_TWN	F	0:02:00.764-0:02:01.030	BL	0.216295	8	0.810293
Trial 1	1.1	S_TWN	F	0:02:01.030-0:02:01.296	BL	0.304825	8	1.14195
Trial 1	1.1	S_TWN	F	0:02:01.296-0:02:01.562	BL	0.269759	8	1.01058
Trial 1	1.1	S_TWN	F	0:02:01.562-0:02:01.828	BL	0.189829	8	0.71115
Trial 1	1.1	S_TWN	F	0:02:01.828-0:02:02.094	BL	0.56909	8	2.13195
Trial 1	1.1	S_TWN	F	0:02:02.094-0:02:02.360	BL	0.193551	8	0.725093
Trial 1	1.1	S_TWN	F	0:02:02.360-0:02:02.626	BL	0.546946	8	2.04899
Trial 1	1.1	S_TWN	F	0:02:02.626-0:02:02.892	BL	0.713678	8	2.67362
Trial 1	1.1	S_TWN	F	0:02:02.892-0:02:03.158	BL	0.598384	8	2.2417
Trial 1	1.1	S_TWN	F	0:02:03.158-0:02:03.424	BL	1.32763	8	4.97363
Trial 1	1.1	S_TWN	F	0:02:03.424-0:02:03.690	BL	2.10459	7	9.01066
Trial 1	1.1	S_TWN	F	0:02:03.690-0:02:03.956	BL	1.72899	8	6.47725
Trial 1	1.1	S_TWN	F	0:02:03.956-0:02:04.222	BL	1.41207	8	5.28996
Trial 1	1.1	S_TWN	F	0:02:04.222-0:02:04.488	BL	1.89187	8	7.08739
Trial 1	1.1	S_TWN	F	0:02:04.488-0:02:04.754	BL	0.722039	8	2.70495
Trial 1	1.1	S_TWN	F	0:02:04.754-0:02:05.020	BL	0.350729	8	1.31391
Trial 1	1.1	S_TWN	F	0:02:05.020-0:02:05.286	BL	1.33669	8	5.00757
Trial 1	1.1	S_TWN	F	0:02:05.286-0:02:05.552	BL	0.748391	8	2.80365
Trial 1	1.1	S_TWN	F	0:02:05.552-0:02:05.818	BL	0.842114	8	3.15476
Trial 1	1.1	S_TWN	F	0:02:05.818-0:02:06.084	BL	0.741094	8	2.77633
Trial 1	1.1	S_TWN	F	0:02:06.084-0:02:06.350	BL	0.486773	8	1.82357
Trial 1	1.1	S_TWN	F	0:02:06.350-0:02:06.616	BL	1.1437	8	4.28459
Trial 1	1.1	S_TWN	F	0:02:06.616-0:02:06.882	BL	1.49988	8	5.61891
Trial 1	1.1	S_TWN	F	0:02:06.882-0:02:07.148	BL	1.21858	8	4.56512
Trial 1	1.1	S_TWN	F	0:02:07.148-0:02:07.414	BL	0.785277	8	2.94184
Trial 1	1.1	S_TWN	F	0:02:07.414-0:02:07.680	BL	0.612243	8	2.29361
Trial 1	1.1	S_TWN	F	0:02:07.680-0:02:07.946	BL	1.17592	8	4.40533
Trial 1	1.1	S_TWN	F	0:02:07.946-0:02:08.212	BL	4.486	8	16.8057
Trial 1	1.1	S_TWN	F	0:02:08.212-0:02:08.478	BL	5.72089	8	21.4319
Trial 1	1.1	S_TWN	F	0:02:08.478-0:02:08.744	BL	5.50104	8	20.6083
Trial 1	1.1	S_TWN	F	0:02:08.744-0:02:09.010	BL	1.91418	8	7.17099
Trial 1	1.1	S_TWN	F	0:02:09.010-0:02:09.276	BL	0.659398	8	2.47028
Trial 1	1.1	S_TWN	F	0:02:09.276-0:02:09.542	BL	1.27243	8	4.76686
Trial 1	1.1	S_TWN	F	0:02:09.542-0:02:09.808	BL	0.516643	8	1.93547
Trial 1	1.1	S_TWN	F	0:02:09.808-0:02:10.074	BL	0.182804	8	0.684833
Trial 1	1.1	S_TWN	F	0:02:10.074-0:02:10.340	BL	0.104588	8	0.391811
Trial 1	1.1	S_TWN	F	0:02:10.340-0:02:10.606	BL	0.242309	8	0.907751
Trial 1	1.1	S_TWN	F	0:02:10.606-0:02:10.872	BL	0.369476	8	1.38415
Trial 1	1.1	S_TWN	F	0:02:10.872-0:02:11.138	BL	0.831918	8	3.11656
Trial 1	1.1	S_TWN	F	0:02:11.138-0:02:11.404	BL	2.04462	8	7.65972
Trial 1	1.1	S_TWN	F	0:02:11.404-0:02:11.670	BL	1.92773	8	7.22176
Trial 1	1.1	S_TWN	F	0:02:11.670-0:02:11.936	BL	1.78202	8	6.67588
Trial 1	1.1	S_TWN	F	0:02:11.936-0:02:12.202	BL	2.428	8	9.09586
Trial 1	1.1	S_TWN	F	0:02:12.202-0:02:12.468	BL	1.32588	8	4.96706
Trial 1	1.1	S_TWN	F	0:02:12.468-0:02:12.734	BL	0.954109	8	3.57435
Trial 1	1.1	S_TWN	F	0:02:12.734-0:02:13.000	BL	0.930786	8	3.48695
Trial 1	1.1	S_TWN	F	0:02:13.000-0:02:13.266	BL	1.29533	7	5.54589
Trial 1	1.1	S_TWN	F	0:02:13.266-0:02:13.532	BL	1.18868	8	4.45312
Trial 1	1.1	S_TWN	F	0:02:13.532-0:02:13.798	BL	0.25102	8	0.94038
Trial 1	1.1	S_TWN	F	0:02:13.798-0:02:14.064	BL	0.40769	8	1.52731
Trial 1	1.1	S_TWN	F	0:02:14.064-0:02:14.330	BL	0.376586	8	1.41078
Trial 1	1.1	S_TWN	F	0:02:14.330-0:02:14.596	BL	0.321723	8	1.20525
Trial 1	1.1	S_TWN	F	0:02:14.596-0:02:14.862	BL	0.738615	8	2.76705
Trial 1	1.1	S_TWN	F	0:02:14.862-0:02:15.128	BL	0.475678	8	1.78201
Trial 1	1.1	S_TWN	F	0:02:15.128-0:02:15.394	BL	0.520312	8	1.94923
Trial 1	1.1	S_TWN	F	0:02:15.394-0:02:15.660	BL	2.55631	8	9.57658
Trial 1	1.1	S_TWN	F	0:02:15.660-0:02:15.926	BL	1.71459	8	6.42327
Trial 1	1.1	S_TWN	F	0:02:15.926-0:02:16.192	BL	0.284076	8	1.06423
Trial 1	1.1	S_TWN	F	0:02:16.192-0:02:16.458	BL	1.58888	8	5.95231
Trial 1	1.1	S_TWN	F	0:02:16.458-0:02:16.724	BL	1.66317	8	6.23064
Trial 1	1.1	S_TWN	F	0:02:16.724-0:02:16.990	BL	0.403345	8	1.51103
Trial 1	1.1	S_TWN	F	0:02:16.990-0:02:17.256	BL	0.208197	8	0.779958
Trial 1	1.1	S_TWN	F	0:02:17.256-0:02:17.522	BL	0.408781	8	1.5314
Trial 1	1.1	S_TWN	F	0:02:17.522-0:02:17.788	BL	0.85518	8	3.20371
Trial 1	1.1	S_TWN	F	0:02:17.788-0:02:18.054	BL	1.2092	8	4.52998
Trial 1	1.1	S_TWN	F	0:02:18.054-0:02:18.320	BL	1.04615	8	3.91914
Trial 1	1.1	S_TWN	F	0:02:18.320-0:02:18.586	BL	0.670558	8	2.51206
Trial 1	1.1	S_TWN	F	0:02:18.586-0:02:18.852	BL	0.636595	8	2.38485
Trial 1	1.1	S_TWN	F	0:02:18.852-0:02:19.118	BL	0.647726	8	2.42654
Trial 1	1.1	S_TWN	F	0:02:19.118-0:02:19.384	BL	0.85688	8	3.21009
Trial 1	1.1	S_TWN	F	0:02:19.384-0:02:19.650	BL	0.66182	8	2.47934
Trial 1	1.1	S_TWN	F	0:02:19.650-0:02:19.916	BL	1.7097	8	6.40496
Trial 1	1.1	S_TWN	F	0:02:19.916-0:02:20.182	BL	2.91578	8	10.9233
Trial 1	1.1	S_TWN	F	0:02:20.182-0:02:20.448	BL	4.92651	8	18.4559
Trial 1	1.1	S_TWN	F	0:02:20.448-0:02:20.714	BL	5.60639	8	21.003
Trial 1	1.1	S_TWN	F	0:02:20.714-0:02:20.980	BL	1.99217	8	7.46314
Trial 1	1.1	S_TWN	F	0:02:20.980-0:02:21.246	BL	0.489175	8	1.83256
Trial 1	1.1	S_TWN	F	0:02:21.246-0:02:21.512	BL	2.30973	8	8.65281
Trial 1	1.1	S_TWN	F	0:02:21.512-0:02:21.778	BL	1.9967	8	7.48009
Trial 1	1.1	S_TWN	F	0:02:21.778-0:02:22.044	BL	3.14509	8	11.7823
Trial 1	1.1	S_TWN	F	0:02:22.044-0:02:22.310	BL	1.69532	8	6.35112
Trial 1	1.1	S_TWN	F	0:02:22.310-0:02:22.576	BL	0.565795	8	2.1196
Trial 1	1.1	S_TWN	F	0:02:22.576-0:02:22.842	BL	7.07957	7	30.3109
Trial 1	1.1	S_TWN	F	0:02:22.842-0:02:23.108	BL	1.63764	8	6.13499
Trial 1	1.1	S_TWN	F	0:02:23.108-0:02:23.374	BL	1.05271	8	3.94371
Trial 1	1.1	S_TWN	F	0:02:23.374-0:02:23.640	BL	2.55928	8	9.58773
Trial 1	1.1	S_TWN	F	0:02:23.640-0:02:23.906	BL	4.11722	8	15.4241
Trial 1	1.1	S_TWN	F	0:02:23.906-0:02:24.172	BL	1.72131	8	6.44844
Trial 1	1.1	S_TWN	F	0:02:24.172-0:02:24.438	BL	2.14405	8	8.03214
Trial 1	1.1	S_TWN	F	0:02:24.438-0:02:24.704	BL	2.39597	8	8.97589
Trial 1	1.1	S_TWN	F	0:02:24.704-0:02:24.970	BL	2.86306	8	10.7258
Trial 1	1.1	S_TWN	F	0:02:24.970-0:02:25.236	BL	1.72947	8	6.47901
Trial 1	1.1	S_TWN	F	0:02:25.236-0:02:25.502	BL	1.82284	8	6.82879
Trial 1	1.1	S_TWN	F	0:02:25.502-0:02:25.768	BL	5.36272	8	20.0901
Trial 1	1.1	S_TWN	F	0:02:25.768-0:02:26.034	BL	3.64024	8	13.6372
Trial 1	1.1	S_TWN	F	0:02:26.034-0:02:26.300	BL	3.12643	8	11.7124
Trial 1	1.1	S_TWN	F	0:02:26.300-0:02:26.566	BL	1.59685	8	5.98219
Trial 1	1.1	S_TWN	F	0:02:26.566-0:02:26.832	BL	0.262206	8	0.982284
Trial 1	1.1	S_TWN	F	0:02:26.832-0:02:27.098	BL	1.07351	8	4.02162
Trial 1	1.1	S_TWN	F	0:02:27.098-0:02:27.364	BL	0.629473	8	2.35816
Trial 1	1.1	S_TWN	F	0:02:27.364-0:02:27.630	BL	0.381819	8	1.4304
Trial 1	1.1	S_TWN	F	0:02:27.630-0:02:27.896	BL	0.149029	8	0.558296
Trial 1	1.1	S_TWN	F	0:02:27.896-0:02:28.162	BL	0.445868	8	1.67033
Trial 1	1.1	S_TWN	F	0:02:28.162-0:02:28.428	BL	0.429785	8	1.61009
Trial 1	1.1	S_TWN	F	0:02:28.428-0:02:28.694	BL	0.135397	8	0.507232
Trial 1	1.1	S_TWN	F	0:02:28.694-0:02:28.960	BL	0.0926699	8	0.347167
Trial 1	1.1	S_TWN	F	0:02:28.960-0:02:29.226	BL	0.0782273	8	0.293059
Trial 1	1.1	S_TWN	F	0:02:29.226-0:02:29.492	BL	0.390784	8	1.46399
Trial 1	1.1	S_TWN	F	0:02:29.492-0:02:29.758	BL	0.304224	8	1.13971
Trial 1	1.1	S_TWN	F	0:02:29.758-0:02:30.024	BL	0.771483	8	2.89016
Trial 1	1.1	S_TWN	F	0:02:30.024-0:02:30.290	BL	0.398829	8	1.49412
Trial 1	1.1	S_TWN	F	0:02:30.290-0:02:30.556	BL	0.819296	8	3.06928
Trial 1	1.1	S_TWN	F	0:02:30.556-0:02:30.822	BL	0.498721	8	1.86833
Trial 1	1.1	S_TWN	F	0:02:30.822-0:02:31.088	BL	0.530788	8	1.98847
Trial 1	1.1	S_TWN	F	0:02:31.088-0:02:31.354	BL	0.655271	8	2.4548
Trial 1	1.1	S_TWN	F	0:02:31.354-0:02:31.620	BL	4.44165	8	16.6396
Trial 1	1.1	S_TWN	F	0:02:31.620-0:02:31.886	BL	2.80026	8	10.4904
Trial 1	1.1	S_TWN	F	0:02:31.886-0:02:32.152	BL	0.921472	7	3.94521
Trial 1	1.1	S_TWN	F	0:02:32.152-0:02:32.418	BL	3.97338	8	14.8853
Trial 1	1.1	S_TWN	F	0:02:32.418-0:02:32.684	BL	4.12008	8	15.4348
Trial 1	1.1	S_TWN	F	0:02:32.684-0:02:32.950	BL	2.13607	8	8.00225
Trial 1	1.1	S_TWN	F	0:02:32.950-0:02:33.216	BL	0.705198	8	2.64186
Trial 1	1.1	S_TWN	F	0:02:33.216-0:02:33.482	BL	4.76211	8	17.84
Trial 1	1.1	S_TWN	F	0:02:33.482-0:02:33.748	BL	4.5288	8	16.9661
Trial 1	1.1	S_TWN	F	0:02:33.748-0:02:34.014	BL	2.20083	8	8.24481
Trial 1	1.1	S_TWN	F	0:02:34.014-0:02:34.280	BL	0.940135	8	3.52197
Trial 1	1.1	S_TWN	F	0:02:34.280-0:02:34.546	BL	0.637901	8	2.38974
Trial 1	1.1	S_TWN	F	0:02:34.546-0:02:34.812	BL	0.732376	8	2.74367
Trial 1	1.1	S_TWN	F	0:02:34.812-0:02:35.078	BL	0.35423	8	1.32704
Trial 1	1.1	S_TWN	F	0:02:35.078-0:02:35.344	BL	1.24305	8	4.65679
Trial 1	1.1	S_TWN	F	0:02:35.344-0:02:35.610	BL	0.656479	8	2.45934
Trial 1	1.1	S_TWN	F	0:02:35.610-0:02:35.876	BL	0.66272	8	2.48271
Trial 1	1.1	S_TWN	F	0:02:35.876-0:02:36.142	BL	1.11435	8	4.17463
Trial 1	1.1	S_TWN	F	0:02:36.142-0:02:36.408	BL	3.82026	8	14.3117
Trial 1	1.1	S_TWN	F	0:02:36.408-0:02:36.674	BL	1.91662	8	7.18011
Trial 1	1.1	S_TWN	F	0:02:36.674-0:02:36.940	BL	0.564569	8	2.11501
Trial 1	1.1	S_TWN	F	0:02:36.940-0:02:37.206	BL	1.08495	8	4.06452
Trial 1	1.1	S_TWN	F	0:02:37.206-0:02:37.472	BL	2.99031	8	11.2025
Trial 1	1.1	S_TWN	F	0:02:37.472-0:02:37.738	BL	0.622512	8	2.33208
Trial 1	1.1	S_TWN	F	0:02:37.738-0:02:38.004	BL	0.306766	8	1.14922
Trial 1	1.1	S_TWN	F	0:02:38.004-0:02:38.270	BL	0.363647	8	1.36231
Trial 1	1.1	S_TWN	F	0:02:38.270-0:02:38.536	BL	2.87591	8	10.7739
Trial 1	1.1	S_TWN	F	0:02:38.536-0:02:38.802	BL	2.70036	8	10.1162
Trial 1	1.1	S_TWN	F	0:02:38.802-0:02:39.068	BL	0.829396	8	3.10714
Trial 1	1.1	S_TWN	F	0:02:39.068-0:02:39.334	BL	0.461531	8	1.729
Trial 1	1.1	S_TWN	F	0:02:39.334-0:02:39.600	BL	0.374665	8	1.40359
Trial 1	1.1	S_TWN	F	0:02:39.600-0:02:39.866	BL	0.297931	8	1.11613
Trial 1	1.1	S_TWN	F	0:02:39.866-0:02:40.132	BL	0.405762	8	1.52009
Trial 1	1.1	S_TWN	F	0:02:40.132-0:02:40.398	BL	0.817452	8	3.06239
Trial 1	1.1	S_TWN	F	0:02:40.398-0:02:40.664	BL	0.944366	8	3.53782
Trial 1	1.1	S_TWN	F	0:02:40.664-0:02:40.930	BL	1.81421	8	6.79648
Trial 1	1.1	S_TWN	F	0:02:40.930-0:02:41.196	BL	2.78996	8	10.4519
Trial 1	1.1	S_TWN	F	0:02:41.196-0:02:41.462	BL	4.01231	8	15.0311
Trial 1	1.1	S_TWN	F	0:02:41.462-0:02:41.728	BL	3.48773	7	14.9325
Trial 1	1.1	S_TWN	F	0:02:41.728-0:02:41.994	BL	1.16528	8	4.36543
Trial 1	1.1	S_TWN	F	0:02:41.994-0:02:42.260	BL	0.808465	8	3.02871
Trial 1	1.1	S_TWN	F	0:02:42.260-0:02:42.526	BL	1.53171	8	5.73819
Trial 1	1.1	S_TWN	F	0:02:42.526-0:02:42.792	BL	0.854069	8	3.19956
Trial 1	1.1	S_TWN	F	0:02:42.792-0:02:43.058	BL	0.34697	8	1.29983
Trial 1	1.1	S_TWN	F	0:02:43.058-0:02:43.324	BL	1.78593	8	6.69057
Trial 1	1.1	S_TWN	F	0:02:43.324-0:02:43.590	BL	4.21571	8	15.7931
Trial 1	1.1	S_TWN	F	0:02:43.590-0:02:43.856	BL	2.56652	8	9.61484
Trial 1	1.1	S_TWN	F	0:02:43.856-0:02:44.122	BL	0.451964	8	1.69317
Trial 1	1.1	S_TWN	F	0:02:44.122-0:02:44.388	BL	0.254522	8	0.9535
Trial 1	1.1	S_TWN	F	0:02:44.388-0:02:44.654	BL	0.129905	8	0.486658
Trial 1	1.1	S_TWN	F	0:02:44.654-0:02:44.920	BL	0.185792	8	0.696022
Trial 1	1.1	S_TWN	F	0:02:44.920-0:02:45.186	BL	0.179699	8	0.673198
Trial 1	1.1	S_TWN	F	0:02:45.186-0:02:45.452	BL	2.75809	8	10.3325
Trial 1	1.1	S_TWN	F	0:02:45.452-0:02:45.718	BL	4.8924	8	18.3281
Trial 1	1.1	S_TWN	F	0:02:45.718-0:02:45.984	BL	4.27187	8	16.0035
Trial 1	1.1	S_TWN	F	0:02:45.984-0:02:46.250	BL	2.42803	8	9.09598
Trial 1	1.1	S_TWN	F	0:02:46.250-0:02:46.516	BL	2.16759	8	8.12032
Trial 1	1.1	S_TWN	F	0:02:46.516-0:02:46.782	BL	1.35807	8	5.0877
Trial 1	1.1	S_TWN	F	0:02:46.782-0:02:47.048	BL	0.39755	8	1.48931
Trial 1	1.1	S_TWN	F	0:02:47.048-0:02:47.314	BL	0.60947	8	2.28325
Trial 1	1.1	S_TWN	F	0:02:47.314-0:02:47.580	BL	0.475508	8	1.78137
Trial 1	1.1	S_TWN	F	0:02:47.580-0:02:47.846	BL	0.34803	8	1.3038
Trial 1	1.1	S_TWN	F	0:02:47.846-0:02:48.112	BL	0.356756	8	1.3365
Trial 1	1.1	S_TWN	F	0:02:48.112-0:02:48.378	BL	0.684133	8	2.56293
Trial 1	1.1	S_TWN	F	0:02:48.378-0:02:48.644	BL	0.253532	8	0.949797
Trial 1	1.1	S_TWN	F	0:02:48.644-0:02:48.910	BL	0.510209	8	1.91137
Trial 1	1.1	S_TWN	F	0:02:48.910-0:02:49.176	BL	1.02944	8	3.85654
Trial 1	1.1	S_TWN	F	0:02:49.176-0:02:49.442	BL	0.925876	8	3.46858
Trial 1	1.1	S_TWN	F	0:02:49.442-0:02:49.708	BL	0.692419	8	2.59397
Trial 1	1.1	S_TWN	F	0:02:49.708-0:02:49.974	BL	1.65828	8	6.21233
Trial 1	1.1	S_TWN	F	0:02:49.974-0:02:50.240	BL	1.17714	8	4.40985
Trial 1	1.1	S_TWN	F	0:02:50.240-0:02:50.506	BL	0.26618	8	0.997178
Trial 1	1.1	S_TWN	F	0:02:50.506-0:02:50.772	BL	0.413782	8	1.55014
Trial 1	1.1	S_TWN	F	0:02:50.772-0:02:51.038	BL	2.12167	8	7.94829
Trial 1	1.1	S_TWN	F	0:02:51.038-0:02:51.304	BL	1.75312	7	7.50584
Trial 1	1.1	S_TWN	F	0:02:51.304-0:02:51.570	BL	1.86257	8	6.97765
Trial 1	1.1	S_TWN	F	0:02:51.570-0:02:51.836	BL	1.01643	8	3.80778
Trial 1	1.1	S_TWN	F	0:02:51.836-0:02:52.102	BL	0.719868	8	2.69681
Trial 1	1.1	S_TWN	F	0:02:52.102-0:02:52.368	BL	0.320393	8	1.20027
Trial 1	1.1	S_TWN	F	0:02:52.368-0:02:52.634	BL	0.517641	8	1.93921
Trial 1	1.1	S_TWN	F	0:02:52.634-0:02:52.900	BL	0.40138	8	1.50367
Trial 1	1.1	S_TWN	F	0:02:52.900-0:02:53.166	BL	0.606489	8	2.27206
Trial 1	1.1	S_TWN	F	0:02:53.166-0:02:53.432	BL	0.332761	8	1.24661
Trial 1	1.1	S_TWN	F	0:02:53.432-0:02:53.698	BL	0.842497	8	3.15619
Trial 1	1.1	S_TWN	F	0:02:53.698-0:02:53.964	BL	1.34468	8	5.03749
Trial 1	1.1	S_TWN	F	0:02:53.964-0:02:54.230	BL	1.4687	8	5.50213
Trial 1	1.1	S_TWN	F	0:02:54.230-0:02:54.496	BL	2.47411	8	9.26862
Trial 1	1.1	S_TWN	F	0:02:54.496-0:02:54.762	BL	1.18844	8	4.4522
Trial 1	1.1	S_TWN	F	0:02:54.762-0:02:55.028	BL	1.58584	8	5.94094
Trial 1	1.1	S_TWN	F	0:02:55.028-0:02:55.294	BL	0.697239	8	2.61203
Trial 1	1.1	S_TWN	F	0:02:55.294-0:02:55.560	BL	0.417306	8	1.56333
Trial 1	1.1	S_TWN	F	0:02:55.560-0:02:55.826	BL	0.138286	8	0.518052
Trial 1	1.1	S_TWN	F	0:02:55.826-0:02:56.092	BL	1.46501	8	5.48827
Trial 1	1.1	S_TWN	F	0:02:56.092-0:02:56.358	BL	1.72	8	6.44352
Trial 1	1.1	S_TWN	F	0:02:56.358-0:02:56.624	BL	1.17883	8	4.41617
Trial 1	1.1	S_TWN	F	0:02:56.624-0:02:56.890	BL	0.889016	8	3.33048
Trial 1	1.1	S_TWN	F	0:02:56.890-0:02:57.156	BL	1.56148	8	5.84966
Trial 1	1.1	S_TWN	F	0:02:57.156-0:02:57.422	BL	3.13114	8	11.7302
Trial 1	1.1	S_TWN	F	0:02:57.422-0:02:57.688	BL	8.26658	8	30.9685
Trial 1	1.1	S_TWN	F	0:02:57.688-0:02:57.954	BL	3.49538	8	13.0945
Trial 1	1.1	S_TWN	F	0:02:57.954-0:02:58.220	BL	1.9347	8	7.24788
Trial 1	1.1	S_TWN	F	0:02:58.220-0:02:58.486	BL	1.14774	8	4.29972
Trial 1	1.1	S_TWN	F	0:02:58.486-0:02:58.752	BL	1.23429	8	4.62397
Trial 1	1.1	S_TWN	F	0:02:58.752-0:02:59.018	BL	1.37248	8	5.14167
Trial 1	1.1	S_TWN	F	0:02:59.018-0:02:59.284	BL	0.699011	8	2.61867
Trial 1	1.1	S_TWN	F	0:02:59.284-0:02:59.550	BL	0.699011	8	2.61868
Trial 1	1.1	S_TWN	F	0:02:59.550-0:02:59.816	BL	0.699011	8	2.61867
Trial 1	1.1	S_TWN	F	0:02:59.816-0:03:00.082	BL	0.714068	8	2.67508
Trial 1	1.1	S_TWN	F	0:03:00.082-0:03:00.348	CS1a	0.775075	8	2.90362
Trial 1	1.1	S_TWN	F	0:03:00.348-0:03:00.614	CS1a	0.775075	8	2.90362
Trial 1	1.1	S_TWN	F	0:03:00.614-0:03:00.880	CS1a	1.88447	7	8.06823
Trial 1	1.1	S_TWN	F	0:03:00.880-0:03:01.146	CS1a	0.920573	8	3.4487
Trial 1	1.1	S_TWN	F	0:03:01.146-0:03:01.412	CS1a	1.01721	8	3.81074
Trial 1	1.1	S_TWN	F	0:03:01.412-0:03:01.678	CS1a	1.47186	8	5.51398
Trial 1	1.1	S_TWN	F	0:03:01.678-0:03:01.944	CS1a	1.07122	8	4.01305
Trial 1	1.1	S_TWN	F	0:03:01.944-0:03:02.210	CS1a	1.21673	8	4.55817
Trial 1	1.1	S_TWN	F	0:03:02.210-0:03:02.476	CS1a	2.47056	8	9.25536
Trial 1	1.1	S_TWN	F	0:03:02.476-0:03:02.742	CS1a	0.831113	8	3.11355
Trial 1	1.1	S_TWN	F	0:03:02.742-0:03:03.008	CS1a	1.31963	8	4.94365
Trial 1	1.1	S_TWN	F	0:03:03.008-0:03:03.274	CS1a	0.852305	8	3.19294
Trial 1	1.1	S_TWN	F	0:03:03.274-0:03:03.540	CS1a	1.08281	8	4.05647
Trial 1	1.1	S_TWN	F	0:03:03.540-0:03:03.806	CS1a	2.603	8	9.75149
Trial 1	1.1	S_TWN	F	0:03:03.806-0:03:04.072	CS1a	4.31712	8	16.173
Trial 1	1.1	S_TWN	F	0:03:04.072-0:03:04.338	CS1a	5.20421	8	19.4963
Trial 1	1.1	S_TWN	F	0:03:04.338-0:03:04.604	CS1a	3.84092	8	14.389
Trial 1	1.1	S_TWN	F	0:03:04.604-0:03:04.870	CS1a	0.796914	8	2.98544
Trial 1	1.1	S_TWN	F	0:03:04.870-0:03:05.136	CS1a	0.264862	8	0.992243
Trial 1	1.1	S_TWN	F	0:03:05.136-0:03:05.402	CS1a	0.296029	8	1.10899
Trial 1	1.1	S_TWN	F	0:03:05.402-0:03:05.668	CS1a	0.39023	8	1.4619
Trial 1	1.1	S_TWN	F	0:03:05.668-0:03:05.934	CS1a	0.5178	8	1.93981
Trial 1	1.1	S_TWN	F	0:03:05.934-0:03:06.200	CS1a	0.839575	8	3.14526
Trial 1	1.1	S_TWN	F	0:03:06.200-0:03:06.466	CS1a	2.97916	8	11.1607
Trial 1	1.1	S_TWN	F	0:03:06.466-0:03:06.732	CS1a	2.92882	8	10.9721
Trial 1	1.1	S_TWN	F	0:03:06.732-0:03:06.998	CS1a	0.700679	8	2.62493
Trial 1	1.1	S_TWN	F	0:03:06.998-0:03:07.264	CS1a	0.186142	8	0.697334
Trial 1	1.1	S_TWN	F	0:03:07.264-0:03:07.530	CS1a	0.76597	8	2.8695
Trial 1	1.1	S_TWN	F	0:03:07.530-0:03:07.796	CS1a	0.844691	8	3.16442
Trial 1	1.1	S_TWN	F	0:03:07.796-0:03:08.062	CS1a	1.27465	8	4.77513
Trial 1	1.1	S_TWN	F	0:03:08.062-0:03:08.328	CS1a	2.04875	8	7.67512
Trial 1	1.1	S_TWN	F	0:03:08.328-0:03:08.594	CS1a	2.37748	8	8.90665
Trial 1	1.1	S_TWN	F	0:03:08.594-0:03:08.860	CS1a	1.83353	8	6.86887
Trial 1	1.1	S_TWN	F	0:03:08.860-0:03:09.126	CS1a	2.18306	8	8.17831
Trial 1	1.1	S_TWN	F	0:03:09.126-0:03:09.392	CS1a	1.62207	8	6.07668
Trial 1	1.1	S_TWN	F	0:03:09.392-0:03:09.658	CS1a	3.45471	8	12.9422
Trial 1	1.1	S_TWN	F	0:03:09.658-0:03:09.924	CS1a	2.73267	8	10.2372
Trial 1	1.1	S_TWN	F	0:03:09.924-0:03:10.190	CS1a	5.2158	7	22.3311
Trial 1	1.1	S_TWN	F	0:03:10.190-0:03:10.456	CS1b	2.13199	8	7.98699
Trial 1	1.1	S_TWN	F	0:03:10.456-0:03:10.722	CS1b	0.85327	8	3.19655
Trial 1	1.1	S_TWN	F	0:03:10.722-0:03:10.988	CS1b	0.155813	8	0.583715
Trial 1	1.1	S_TWN	F	0:03:10.988-0:03:11.254	CS1b	0.155813	8	0.583717
Trial 1	1.1	S_TWN	F	0:03:11.254-0:03:11.520	CS1b	0.155813	8	0.583715
Trial 1	1.1	S_TWN	F	0:03:11.520-0:03:11.786	CS1b	0.155813	8	0.583717
Trial 1	1.1	S_TWN	F	0:03:11.786-0:03:12.052	CS1b	0.155813	8	0.583715
Trial 1	1.1	S_TWN	F	0:03:12.052-0:03:12.318	CS1b	0.155813	8	0.583715
Trial 1	1.1	S_TWN	F	0:03:12.318-0:03:12.584	CS1b	0.155813	8	0.583717
Trial 1	1.1	S_TWN	F	0:03:12.584-0:03:12.850	CS1b	0.155813	8	0.583715
Trial 1	1.1	S_TWN	F	0:03:12.850-0:03:13.116	CS1b	0.155813	8	0.583717
Trial 1	1.1	S_TWN	F	0:03:13.116-0:03:13.382	CS1b	0.722966	8	2.7084
Trial 1	1.1	S_TWN	F	0:03:13.382-0:03:13.648	CS1b	2.43475	8	9.12117
Trial 1	1.1	S_TWN	F	0:03:13.648-0:03:13.914	CS1b	1.70806	8	6.39884
Trial 1	1.1	S_TWN	F	0:03:13.914-0:03:14.180	CS1b	1.65312	8	6.193
Trial 1	1.1	S_TWN	F	0:03:14.180-0:03:14.446	CS1b	2.04806	8	7.67253
Trial 1	1.1	S_TWN	F	0:03:14.446-0:03:14.712	CS1b	3.24708	8	12.1644
Trial 1	1.1	S_TWN	F	0:03:14.712-0:03:14.978	CS1b	4.76886	8	17.8653
Trial 1	1.1	S_TWN	F	0:03:14.978-0:03:15.244	CS1b	4.70668	8	17.6324
Trial 1	1.1	S_TWN	F	0:03:15.244-0:03:15.510	CS1b	5.75265	8	21.5508
Trial 1	1.1	S_TWN	F	0:03:15.510-0:03:15.776	CS1b	3.40971	8	12.7737
Trial 1	1.1	S_TWN	F	0:03:15.776-0:03:16.042	CS1b	2.59113	8	9.70698
Trial 1	1.1	S_TWN	F	0:03:16.042-0:03:16.308	CS1b	0.268521	8	1.00595
Trial 1	1.1	S_TWN	F	0:03:16.308-0:03:16.574	CS1b	0.525616	8	1.96909
Trial 1	1.1	S_TWN	F	0:03:16.574-0:03:16.840	CS1b	0.782821	8	2.93263
Trial 1	1.1	S_TWN	F	0:03:16.840-0:03:17.106	CS1b	2.6802	8	10.0407
Trial 1	1.1	S_TWN	F	0:03:17.106-0:03:17.372	CS1b	1.95865	8	7.33759
Trial 1	1.1	S_TWN	F	0:03:17.372-0:03:17.638	CS1b	0.752684	8	2.81973
Trial 1	1.1	S_TWN	F	0:03:17.638-0:03:17.904	CS1b	0.866772	8	3.24714
Trial 1	1.1	S_TWN	F	0:03:17.904-0:03:18.170	CS1b	1.9014	8	7.12308
Trial 1	1.1	S_TWN	F	0:03:18.170-0:03:18.436	CS1b	0.891959	8	3.3415
Trial 1	1.1	S_TWN	F	0:03:18.436-0:03:18.702	CS1b	0.928556	8	3.4786
Trial 1	1.1	S_TWN	F	0:03:18.702-0:03:18.968	CS1b	0.493395	8	1.84837
Trial 1	1.1	S_TWN	F	0:03:18.968-0:03:19.234	CS1b	0.251232	8	0.941183
Trial 1	1.1	S_TWN	F	0:03:19.234-0:03:19.500	CS1b	3.22243	8	12.0719
Trial 1	1.1	S_TWN	F	0:03:19.500-0:03:19.766	CS1b	1.41437	7	6.05551
Trial 1	1.1	S_TWN	F	0:03:19.766-0:03:20.032	CS1b	2.03319	8	7.61687
Trial 1	1.1	S_TWN	F	0:03:20.032-0:03:20.298	IT1	12.143	8	45.4909
Trial 1	1.1	S_TWN	F	0:03:20.298-0:03:20.564	IT1	16.949	8	63.4953
Trial 1	1.1	S_TWN	F	0:03:20.564-0:03:20.830	IT1	14.5775	8	54.6108
Trial 1	1.1	S_TWN	F	0:03:20.830-0:03:21.096	IT1	16.0769	8	60.2278
Trial 1	1.1	S_TWN	F	0:03:21.096-0:03:21.362	IT1	5.0571	8	18.9452
Trial 1	1.1	S_TWN	F	0:03:21.362-0:03:21.628	IT1	0.429326	8	1.60836
Trial 1	1.1	S_TWN	F	0:03:21.628-0:03:21.894	IT1	0.771544	8	2.89039
Trial 1	1.1	S_TWN	F	0:03:21.894-0:03:22.160	IT1	0.24236	8	0.907944
Trial 1	1.1	S_TWN	F	0:03:22.160-0:03:22.426	IT1	0.24501	8	0.917863
Trial 1	1.1	S_TWN	F	0:03:22.426-0:03:22.692	IT1	0.221374	8	0.82932
Trial 1	1.1	S_TWN	F	0:03:22.692-0:03:22.958	IT1	0.146132	8	0.547447
Trial 1	1.1	S_TWN	F	0:03:22.958-0:03:23.224	IT1	0.37973	8	1.42257
Trial 1	1.1	S_TWN	F	0:03:23.224-0:03:23.490	IT1	0.224289	8	0.840243
Trial 1	1.1	S_TWN	F	0:03:23.490-0:03:23.756	IT1	0.403064	8	1.50997
Trial 1	1.1	S_TWN	F	0:03:23.756-0:03:24.022	IT1	0.231279	8	0.866428
Trial 1	1.1	S_TWN	F	0:03:24.022-0:03:24.288	IT1	0.203187	8	0.761189
Trial 1	1.1	S_TWN	F	0:03:24.288-0:03:24.554	IT1	0.15828	8	0.592955
Trial 1	1.1	S_TWN	F	0:03:24.554-0:03:24.820	IT1	0.28122	8	1.05353
Trial 1	1.1	S_TWN	F	0:03:24.820-0:03:25.086	IT1	0.131024	8	0.490849
Trial 1	1.1	S_TWN	F	0:03:25.086-0:03:25.352	IT1	0.271726	8	1.01796
Trial 1	1.1	S_TWN	F	0:03:25.352-0:03:25.618	IT1	1.8645	8	6.98488
Trial 1	1.1	S_TWN	F	0:03:25.618-0:03:25.884	IT1	3.12353	8	11.7015
Trial 1	1.1	S_TWN	F	0:03:25.884-0:03:26.150	IT1	0.684778	8	2.56536
Trial 1	1.1	S_TWN	F	0:03:26.150-0:03:26.416	IT1	0.276484	8	1.03577
Trial 1	1.1	S_TWN	F	0:03:26.416-0:03:26.682	IT1	0.289564	8	1.08479
Trial 1	1.1	S_TWN	F	0:03:26.682-0:03:26.948	IT1	0.402379	8	1.50741
Trial 1	1.1	S_TWN	F	0:03:26.948-0:03:27.214	IT1	0.474454	8	1.77742
Trial 1	1.1	S_TWN	F	0:03:27.214-0:03:27.480	IT1	0.475188	8	1.78017
Trial 1	1.1	S_TWN	F	0:03:27.480-0:03:27.746	IT1	0.12851	8	0.481434
Trial 1	1.1	S_TWN	F	0:03:27.746-0:03:28.012	IT1	0.221416	8	0.82948
Trial 1	1.1	S_TWN	F	0:03:28.012-0:03:28.278	IT1	0.129021	8	0.483344
Trial 1	1.1	S_TWN	F	0:03:28.278-0:03:28.544	IT1	1.5812	8	5.92357
Trial 1	1.1	S_TWN	F	0:03:28.544-0:03:28.810	IT1	1.57908	8	5.91563
Trial 1	1.1	S_TWN	F	0:03:28.810-0:03:29.076	IT1	1.64682	8	6.16938
Trial 1	1.1	S_TWN	F	0:03:29.076-0:03:29.342	IT1	1.75115	7	7.49739
Trial 1	1.1	S_TWN	F	0:03:29.342-0:03:29.608	IT1	1.04415	8	3.91164
Trial 1	1.1	S_TWN	F	0:03:29.608-0:03:29.874	IT1	0.165163	8	0.618743
Trial 1	1.1	S_TWN	F	0:03:29.874-0:03:30.140	IT1	0.109448	8	0.410021
Trial 1	1.1	S_TWN	F	0:03:30.140-0:03:30.406	IT1	0.549837	8	2.05982
Trial 1	1.1	S_TWN	F	0:03:30.406-0:03:30.672	IT1	3.80765	8	14.2643
Trial 1	1.1	S_TWN	F	0:03:30.672-0:03:30.938	IT1	3.29524	8	12.3448
Trial 1	1.1	S_TWN	F	0:03:30.938-0:03:31.204	IT1	1.27743	8	4.78554
Trial 1	1.1	S_TWN	F	0:03:31.204-0:03:31.470	IT1	1.42132	8	5.32465
Trial 1	1.1	S_TWN	F	0:03:31.470-0:03:31.736	IT1	1.02624	8	3.84453
Trial 1	1.1	S_TWN	F	0:03:31.736-0:03:32.002	IT1	0.848136	8	3.17732
Trial 1	1.1	S_TWN	F	0:03:32.002-0:03:32.268	IT1	3.0159	8	11.2983
Trial 1	1.1	S_TWN	F	0:03:32.268-0:03:32.534	IT1	2.50309	8	9.37718
Trial 1	1.1	S_TWN	F	0:03:32.534-0:03:32.800	IT1	3.08858	8	11.5706
Trial 1	1.1	S_TWN	F	0:03:32.800-0:03:33.066	IT1	1.41823	8	5.31304
Trial 1	1.1	S_TWN	F	0:03:33.066-0:03:33.332	IT1	0.761722	8	2.85359
Trial 1	1.1	S_TWN	F	0:03:33.332-0:03:33.598	IT1	0.459986	8	1.72322
Trial 1	1.1	S_TWN	F	0:03:33.598-0:03:33.864	IT1	0.280788	8	1.0519
Trial 1	1.1	S_TWN	F	0:03:33.864-0:03:34.130	IT1	0.755997	8	2.83216
Trial 1	1.1	S_TWN	F	0:03:34.130-0:03:34.396	IT1	1.26724	8	4.74738
Trial 1	1.1	S_TWN	F	0:03:34.396-0:03:34.662	IT1	1.26159	8	4.72624
Trial 1	1.1	S_TWN	F	0:03:34.662-0:03:34.928	IT1	0.59631	8	2.23393
Trial 1	1.1	S_TWN	F	0:03:34.928-0:03:35.194	IT1	0.30499	8	1.14257
Trial 1	1.1	S_TWN	F	0:03:35.194-0:03:35.460	IT1	0.147097	8	0.551059
Trial 1	1.1	S_TWN	F	0:03:35.460-0:03:35.726	IT1	0.213359	8	0.799296
Trial 1	1.1	S_TWN	F	0:03:35.726-0:03:35.992	IT1	0.372324	8	1.39482
Trial 1	1.1	S_TWN	F	0:03:35.992-0:03:36.258	IT1	0.295404	8	1.10666
Trial 1	1.1	S_TWN	F	0:03:36.258-0:03:36.524	IT1	0.239096	8	0.895714
Trial 1	1.1	S_TWN	F	0:03:36.524-0:03:36.790	IT1	0.539847	8	2.02241
Trial 1	1.1	S_TWN	F	0:03:36.790-0:03:37.056	IT1	0.571575	8	2.14126
Trial 1	1.1	S_TWN	F	0:03:37.056-0:03:37.322	IT1	0.791274	8	2.96431
Trial 1	1.1	S_TWN	F	0:03:37.322-0:03:37.588	IT1	1.04202	8	3.90365
Trial 1	1.1	S_TWN	F	0:03:37.588-0:03:37.854	IT1	0.871299	8	3.2641
Trial 1	1.1	S_TWN	F	0:03:37.854-0:03:38.120	IT1	0.95808	8	3.58924
Trial 1	1.1	S_TWN	F	0:03:38.120-0:03:38.386	IT1	2.34054	8	8.76828
Trial 1	1.1	S_TWN	F	0:03:38.386-0:03:38.652	IT1	2.3591	8	8.83778
Trial 1	1.1	S_TWN	F	0:03:38.652-0:03:38.918	IT1	0.777126	7	3.32722
Trial 1	1.1	S_TWN	F	0:03:38.918-0:03:39.184	IT1	0.729906	8	2.73441
Trial 1	1.1	S_TWN	F	0:03:39.184-0:03:39.450	IT1	0.293305	8	1.09879
Trial 1	1.1	S_TWN	F	0:03:39.450-0:03:39.716	IT1	0.166556	8	0.623958
Trial 1	1.1	S_TWN	F	0:03:39.716-0:03:39.982	IT1	1.11305	8	4.16974
Trial 1	1.1	S_TWN	F	0:03:39.982-0:03:40.248	IT1	1.13235	8	4.24207
Trial 1	1.1	S_TWN	F	0:03:40.248-0:03:40.514	IT1	0.597125	8	2.23698
Trial 1	1.1	S_TWN	F	0:03:40.514-0:03:40.780	IT1	0.512012	8	1.91813
Trial 1	1.1	S_TWN	F	0:03:40.780-0:03:41.046	IT1	0.692652	8	2.59485
Trial 1	1.1	S_TWN	F	0:03:41.046-0:03:41.312	IT1	1.87091	8	7.0089
Trial 1	1.1	S_TWN	F	0:03:41.312-0:03:41.578	IT1	1.72469	8	6.4611
Trial 1	1.1	S_TWN	F	0:03:41.578-0:03:41.844	IT1	1.4947	8	5.59954
Trial 1	1.1	S_TWN	F	0:03:41.844-0:03:42.110	IT1	1.17496	8	4.40168
Trial 1	1.1	S_TWN	F	0:03:42.110-0:03:42.376	IT1	2.2717	8	8.51038
Trial 1	1.1	S_TWN	F	0:03:42.376-0:03:42.642	IT1	1.24217	8	4.65349
Trial 1	1.1	S_TWN	F	0:03:42.642-0:03:42.908	IT1	0.256574	8	0.961188
Trial 1	1.1	S_TWN	F	0:03:42.908-0:03:43.174	IT1	0.510594	8	1.91282
Trial 1	1.1	S_TWN	F	0:03:43.174-0:03:43.440	IT1	0.353716	8	1.3251
Trial 1	1.1	S_TWN	F	0:03:43.440-0:03:43.706	IT1	0.141881	8	0.531523
Trial 1	1.1	S_TWN	F	0:03:43.706-0:03:43.972	IT1	0.083462	8	0.312668
Trial 1	1.1	S_TWN	F	0:03:43.972-0:03:44.238	IT1	0.593629	8	2.22388
Trial 1	1.1	S_TWN	F	0:03:44.238-0:03:44.504	IT1	2.15213	8	8.06242
Trial 1	1.1	S_TWN	F	0:03:44.504-0:03:44.770	IT1	4.36766	8	16.3623
Trial 1	1.1	S_TWN	F	0:03:44.770-0:03:45.036	IT1	3.158	8	11.8307
Trial 1	1.1	S_TWN	F	0:03:45.036-0:03:45.302	IT1	2.51046	8	9.40479
Trial 1	1.1	S_TWN	F	0:03:45.302-0:03:45.568	IT1	0.975123	8	3.65305
Trial 1	1.1	S_TWN	F	0:03:45.568-0:03:45.834	IT1	0.950191	8	3.55967
Trial 1	1.1	S_TWN	F	0:03:45.834-0:03:46.100	IT1	0.61341	8	2.29798
Trial 1	1.1	S_TWN	F	0:03:46.100-0:03:46.366	IT1	2.01295	8	7.54102
Trial 1	1.1	S_TWN	F	0:03:46.366-0:03:46.632	IT1	0.659172	8	2.46942
Trial 1	1.1	S_TWN	F	0:03:46.632-0:03:46.898	IT1	2.08459	8	7.8094
Trial 1	1.1	S_TWN	F	0:03:46.898-0:03:47.164	IT1	1.95014	8	7.30573
Trial 1	1.1	S_TWN	F	0:03:47.164-0:03:47.430	IT1	0.524839	8	1.96617
Trial 1	1.1	S_TWN	F	0:03:47.430-0:03:47.696	IT1	0.802946	8	3.00805
Trial 1	1.1	S_TWN	F	0:03:47.696-0:03:47.962	IT1	3.01725	8	11.3034
Trial 1	1.1	S_TWN	F	0:03:47.962-0:03:48.228	IT1	5.31416	7	22.7522
Trial 1	1.1	S_TWN	F	0:03:48.228-0:03:48.494	IT1	2.69835	8	10.1087
Trial 1	1.1	S_TWN	F	0:03:48.494-0:03:48.760	IT1	3.84349	8	14.3987
Trial 1	1.1	S_TWN	F	0:03:48.760-0:03:49.026	IT1	3.57583	8	13.3959
Trial 1	1.1	S_TWN	F	0:03:49.026-0:03:49.292	IT1	2.63518	8	9.87207
Trial 1	1.1	S_TWN	F	0:03:49.292-0:03:49.558	IT1	2.22081	8	8.31968
Trial 1	1.1	S_TWN	F	0:03:49.558-0:03:49.824	IT1	1.83648	8	6.87992
Trial 1	1.1	S_TWN	F	0:03:49.824-0:03:50.090	IT1	2.68352	8	10.0531
Trial 1	1.1	S_TWN	F	0:03:50.090-0:03:50.356	IT1	0.673157	8	2.52181
Trial 1	1.1	S_TWN	F	0:03:50.356-0:03:50.622	IT1	0.396438	8	1.48516
Trial 1	1.1	S_TWN	F	0:03:50.622-0:03:50.888	IT1	0.328587	8	1.23097
Trial 1	1.1	S_TWN	F	0:03:50.888-0:03:51.154	IT1	3.51666	8	13.1744
Trial 1	1.1	S_TWN	F	0:03:51.154-0:03:51.420	IT1	3.22786	8	12.0923
Trial 1	1.1	S_TWN	F	0:03:51.420-0:03:51.686	IT1	0.833927	8	3.12411
Trial 1	1.1	S_TWN	F	0:03:51.686-0:03:51.952	IT1	0.77096	8	2.88822
Trial 1	1.1	S_TWN	F	0:03:51.952-0:03:52.218	IT1	0.778992	8	2.91829
Trial 1	1.1	S_TWN	F	0:03:52.218-0:03:52.484	IT1	1.83148	8	6.86119
Trial 1	1.1	S_TWN	F	0:03:52.484-0:03:52.750	IT1	0.55024	8	2.06133
Trial 1	1.1	S_TWN	F	0:03:52.750-0:03:53.016	IT1	0.234402	8	0.878126
Trial 1	1.1	S_TWN	F	0:03:53.016-0:03:53.282	IT1	1.59253	8	5.96603
Trial 1	1.1	S_TWN	F	0:03:53.282-0:03:53.548	IT1	2.82941	8	10.5996
Trial 1	1.1	S_TWN	F	0:03:53.548-0:03:53.814	IT1	4.34063	8	16.2611
Trial 1	1.1	S_TWN	F	0:03:53.814-0:03:54.080	IT1	2.99085	8	11.2045
Trial 1	1.1	S_TWN	F	0:03:54.080-0:03:54.346	IT1	3.52372	8	13.2007
Trial 1	1.1	S_TWN	F	0:03:54.346-0:03:54.612	IT1	0.793664	8	2.97328
Trial 1	1.1	S_TWN	F	0:03:54.612-0:03:54.878	IT1	0.212058	8	0.794421
Trial 1	1.1	S_TWN	F	0:03:54.878-0:03:55.144	IT1	0.176659	8	0.661809
Trial 1	1.1	S_TWN	F	0:03:55.144-0:03:55.410	IT1	0.163969	8	0.614272
Trial 1	1.1	S_TWN	F	0:03:55.410-0:03:55.676	IT1	0.3697	8	1.38498
Trial 1	1.1	S_TWN	F	0:03:55.676-0:03:55.942	IT1	0.201781	8	0.755926
Trial 1	1.1	S_TWN	F	0:03:55.942-0:03:56.208	IT1	0.273572	8	1.02487
Trial 1	1.1	S_TWN	F	0:03:56.208-0:03:56.474	IT1	0.124515	8	0.466466
Trial 1	1.1	S_TWN	F	0:03:56.474-0:03:56.740	IT1	0.539722	8	2.02193
Trial 1	1.1	S_TWN	F	0:03:56.740-0:03:57.006	IT1	0.55482	8	2.07848
Trial 1	1.1	S_TWN	F	0:03:57.006-0:03:57.272	IT1	2.34455	8	8.78329
Trial 1	1.1	S_TWN	F	0:03:57.272-0:03:57.538	IT1	1.85312	8	6.94223
Trial 1	1.1	S_TWN	F	0:03:57.538-0:03:57.804	IT1	1.4938	7	6.39558
Trial 1	1.1	S_TWN	F	0:03:57.804-0:03:58.070	IT1	1.3219	8	4.95219
Trial 1	1.1	S_TWN	F	0:03:58.070-0:03:58.336	IT1	0.869754	8	3.25831
Trial 1	1.1	S_TWN	F	0:03:58.336-0:03:58.602	IT1	0.218937	8	0.82019
Trial 1	1.1	S_TWN	F	0:03:58.602-0:03:58.868	IT1	0.267873	8	1.00352
Trial 1	1.1	S_TWN	F	0:03:58.868-0:03:59.134	IT1	0.389223	8	1.45814
Trial 1	1.1	S_TWN	F	0:03:59.134-0:03:59.400	IT1	0.354493	8	1.32803
Trial 1	1.1	S_TWN	F	0:03:59.400-0:03:59.666	IT1	0.831811	8	3.11617
Trial 1	1.1	S_TWN	F	0:03:59.666-0:03:59.932	IT1	1.37172	8	5.1388
Trial 1	1.1	S_TWN	F	0:03:59.932-0:04:00.198	IT1	0.800154	8	2.99759
Trial 1	1.1	S_TWN	F	0:04:00.198-0:04:00.464	IT1	2.07136	8	7.75982
Trial 1	1.1	S_TWN	F	0:04:00.464-0:04:00.730	IT1	1.7046	8	6.38586
Trial 1	1.1	S_TWN	F	0:04:00.730-0:04:00.996	IT1	1.06142	8	3.97635
Trial 1	1.1	S_TWN	F	0:04:00.996-0:04:01.262	IT1	0.945261	8	3.54118
Trial 1	1.1	S_TWN	F	0:04:01.262-0:04:01.528	IT1	1.50963	8	5.65548
Trial 1	1.1	S_TWN	F	0:04:01.528-0:04:01.794	IT1	0.311036	8	1.16521
Trial 1	1.1	S_TWN	F	0:04:01.794-0:04:02.060	IT1	2.1691	8	8.12599
Trial 1	1.1	S_TWN	F	0:04:02.060-0:04:02.326	IT1	1.6224	8	6.07792
Trial 1	1.1	S_TWN	F	0:04:02.326-0:04:02.592	IT1	0.545725	8	2.04442
Trial 1	1.1	S_TWN	F	0:04:02.592-0:04:02.858	IT1	0.267047	8	1.00043
Trial 1	1.1	S_TWN	F	0:04:02.858-0:04:03.124	IT1	0.175086	8	0.655915
Trial 1	1.1	S_TWN	F	0:04:03.124-0:04:03.390	IT1	0.282727	8	1.05917
Trial 1	1.1	S_TWN	F	0:04:03.390-0:04:03.656	IT1	0.904111	8	3.38702
Trial 1	1.1	S_TWN	F	0:04:03.656-0:04:03.922	IT1	0.465077	8	1.7423
Trial 1	1.1	S_TWN	F	0:04:03.922-0:04:04.188	IT1	0.426661	8	1.59838
Trial 1	1.1	S_TWN	F	0:04:04.188-0:04:04.454	IT1	0.300058	8	1.12409
Trial 1	1.1	S_TWN	F	0:04:04.454-0:04:04.720	IT1	0.256063	8	0.959276
Trial 1	1.1	S_TWN	F	0:04:04.720-0:04:04.986	IT1	2.45969	8	9.21461
Trial 1	1.1	S_TWN	F	0:04:04.986-0:04:05.252	IT1	1.58654	8	5.94359
Trial 1	1.1	S_TWN	F	0:04:05.252-0:04:05.518	IT1	0.624812	8	2.34071
Trial 1	1.1	S_TWN	F	0:04:05.518-0:04:05.784	IT1	1.15708	8	4.33472
Trial 1	1.1	S_TWN	F	0:04:05.784-0:04:06.050	IT1	1.38606	8	5.19252
Trial 1	1.1	S_TWN	F	0:04:06.050-0:04:06.316	IT1	0.695531	8	2.60562
Trial 1	1.1	S_TWN	F	0:04:06.316-0:04:06.582	IT1	0.915219	8	3.42862
Trial 1	1.1	S_TWN	F	0:04:06.582-0:04:06.848	IT1	2.96523	8	11.1084
Trial 1	1.1	S_TWN	F	0:04:06.848-0:04:07.114	IT1	1.88954	8	7.07868
Trial 1	1.1	S_TWN	F	0:04:07.114-0:04:07.380	IT1	1.68802	7	7.22713
Trial 1	1.1	S_TWN	F	0:04:07.380-0:04:07.646	IT1	2.3862	8	8.93931
Trial 1	1.1	S_TWN	F	0:04:07.646-0:04:07.912	IT1	3.28691	8	12.3136
Trial 1	1.1	S_TWN	F	0:04:07.912-0:04:08.178	IT1	3.80978	8	14.2724
Trial 1	1.1	S_TWN	F	0:04:08.178-0:04:08.444	IT1	1.30981	8	4.90687
Trial 1	1.1	S_TWN	F	0:04:08.444-0:04:08.710	IT1	1.10114	8	4.12515
Trial 1	1.1	S_TWN	F	0:04:08.710-0:04:08.976	IT1	0.429063	8	1.60738
Trial 1	1.1	S_TWN	F	0:04:08.976-0:04:09.242	IT1	0.387285	8	1.45086
Trial 1	1.1	S_TWN	F	0:04:09.242-0:04:09.508	IT1	0.537775	8	2.01465
Trial 1	1.1	S_TWN	F	0:04:09.508-0:04:09.774	IT1	0.409838	8	1.53535
Trial 1	1.1	S_TWN	F	0:04:09.774-0:04:10.040	IT1	0.142668	8	0.534472
Trial 1	1.1	S_TWN	F	0:04:10.040-0:04:10.306	IT1	0.06001	8	0.224815
Trial 1	1.1	S_TWN	F	0:04:10.306-0:04:10.572	IT1	0.250027	8	0.936662
Trial 1	1.1	S_TWN	F	0:04:10.572-0:04:10.838	IT1	0.319919	8	1.1985
Trial 1	1.1	S_TWN	F	0:04:10.838-0:04:11.104	IT1	0.250168	8	0.937193
Trial 1	1.1	S_TWN	F	0:04:11.104-0:04:11.370	IT1	0.431273	8	1.61565
Trial 1	1.1	S_TWN	F	0:04:11.370-0:04:11.636	IT1	1.09755	8	4.11171
Trial 1	1.1	S_TWN	F	0:04:11.636-0:04:11.902	IT1	1.33035	8	4.98379
Trial 1	1.1	S_TWN	F	0:04:11.902-0:04:12.168	IT1	2.10783	8	7.8965
Trial 1	1.1	S_TWN	F	0:04:12.168-0:04:12.434	IT1	4.26395	8	15.9738
Trial 1	1.1	S_TWN	F	0:04:12.434-0:04:12.700	IT1	4.3172	8	16.1733
Trial 1	1.1	S_TWN	F	0:04:12.700-0:04:12.966	IT1	2.80057	8	10.4916
Trial 1	1.1	S_TWN	F	0:04:12.966-0:04:13.232	IT1	2.17946	8	8.1648
Trial 1	1.1	S_TWN	F	0:04:13.232-0:04:13.498	IT1	4.00041	8	14.9866
Trial 1	1.1	S_TWN	F	0:04:13.498-0:04:13.764	IT1	1.29688	8	4.85843
Trial 1	1.1	S_TWN	F	0:04:13.764-0:04:14.030	IT1	0.636468	8	2.38436
Trial 1	1.1	S_TWN	F	0:04:14.030-0:04:14.296	IT1	0.339819	8	1.27305
Trial 1	1.1	S_TWN	F	0:04:14.296-0:04:14.562	IT1	0.254168	8	0.952179
Trial 1	1.1	S_TWN	F	0:04:14.562-0:04:14.828	IT1	0.176974	8	0.662987
Trial 1	1.1	S_TWN	F	0:04:14.828-0:04:15.094	IT1	0.187646	8	0.70297
Trial 1	1.1	S_TWN	F	0:04:15.094-0:04:15.360	IT1	0.530917	8	1.98895
Trial 1	1.1	S_TWN	F	0:04:15.360-0:04:15.626	IT1	0.864508	8	3.23868
Trial 1	1.1	S_TWN	F	0:04:15.626-0:04:15.892	IT1	1.14927	8	4.30543
Trial 1	1.1	S_TWN	F	0:04:15.892-0:04:16.158	IT1	0.997471	8	3.73679
Trial 1	1.1	S_TWN	F	0:04:16.158-0:04:16.424	IT1	1.56742	8	5.87195
Trial 1	1.1	S_TWN	F	0:04:16.424-0:04:16.690	IT1	0.82016	7	3.51145
Trial 1	1.1	S_TWN	F	0:04:16.690-0:04:16.956	IT1	1.94138	8	7.27288
Trial 1	1.1	S_TWN	F	0:04:16.956-0:04:17.222	IT1	4.58983	8	17.1947
Trial 1	1.1	S_TWN	F	0:04:17.222-0:04:17.488	IT1	4.8715	8	18.2498
Trial 1	1.1	S_TWN	F	0:04:17.488-0:04:17.754	IT1	3.3817	8	12.6687
Trial 1	1.1	S_TWN	F	0:04:17.754-0:04:18.020	IT1	4.52734	8	16.9605
Trial 1	1.1	S_TWN	F	0:04:18.020-0:04:18.286	IT1	1.34289	8	5.03082
Trial 1	1.1	S_TWN	F	0:04:18.286-0:04:18.552	IT1	0.223489	8	0.837247
Trial 1	1.1	S_TWN	F	0:04:18.552-0:04:18.818	IT1	0.158548	8	0.593958
Trial 1	1.1	S_TWN	F	0:04:18.818-0:04:19.084	IT1	0.201371	8	0.754389
Trial 1	1.1	S_TWN	F	0:04:19.084-0:04:19.350	IT1	0.201933	8	0.756495
Trial 1	1.1	S_TWN	F	0:04:19.350-0:04:19.616	IT1	0.407459	8	1.52643
Trial 1	1.1	S_TWN	F	0:04:19.616-0:04:19.882	IT1	0.453903	8	1.70044
Trial 1	1.1	S_TWN	F	0:04:19.882-0:04:20.148	IT1	0.235689	8	0.882949
Trial 1	1.1	S_TWN	F	0:04:20.148-0:04:20.414	IT1	0.203391	8	0.761958
Trial 1	1.1	S_TWN	F	0:04:20.414-0:04:20.680	IT1	0.225686	8	0.845477
Trial 1	1.1	S_TWN	F	0:04:20.680-0:04:20.946	IT1	0.429909	8	1.61055
Trial 1	1.1	S_TWN	F	0:04:20.946-0:04:21.212	IT1	0.148058	8	0.554664
Trial 1	1.1	S_TWN	F	0:04:21.212-0:04:21.478	IT1	0.151927	8	0.569154
Trial 1	1.1	S_TWN	F	0:04:21.478-0:04:21.744	IT1	0.229384	8	0.859332
Trial 1	1.1	S_TWN	F	0:04:21.744-0:04:22.010	IT1	0.132335	8	0.495756
Trial 1	1.1	S_TWN	F	0:04:22.010-0:04:22.276	IT1	0.0807234	8	0.30241
Trial 1	1.1	S_TWN	F	0:04:22.276-0:04:22.542	IT1	0.206917	8	0.775162
Trial 1	1.1	S_TWN	F	0:04:22.542-0:04:22.808	IT1	0.119305	8	0.446945
Trial 1	1.1	S_TWN	F	0:04:22.808-0:04:23.074	IT1	0.0400971	8	0.150213
Trial 1	1.1	S_TWN	F	0:04:23.074-0:04:23.340	IT1	0.144219	8	0.540281
Trial 1	1.1	S_TWN	F	0:04:23.340-0:04:23.606	IT1	0.172107	8	0.644752
Trial 1	1.1	S_TWN	F	0:04:23.606-0:04:23.872	IT1	0.294306	8	1.10254
Trial 1	1.1	S_TWN	F	0:04:23.872-0:04:24.138	IT1	0.233386	8	0.874321
Trial 1	1.1	S_TWN	F	0:04:24.138-0:04:24.404	IT1	0.725765	8	2.7189
Trial 1	1.1	S_TWN	F	0:04:24.404-0:04:24.670	IT1	0.598117	8	2.24069
Trial 1	1.1	S_TWN	F	0:04:24.670-0:04:24.936	IT1	0.79144	8	2.96493
Trial 1	1.1	S_TWN	F	0:04:24.936-0:04:25.202	IT1	1.3827	8	5.17998
Trial 1	1.1	S_TWN	F	0:04:25.202-0:04:25.468	IT1	2.6923	8	10.086
Trial 1	1.1	S_TWN	F	0:04:25.468-0:04:25.734	IT1	0.878767	8	3.2921
Trial 1	1.1	S_TWN	F	0:04:25.734-0:04:26.000	IT1	1.98573	8	7.43903
Trial 1	1.1	S_TWN	F	0:04:26.000-0:04:26.266	IT1	0.503963	7	2.15769
Trial 1	1.1	S_TWN	F	0:04:26.266-0:04:26.532	IT1	0.1834	8	0.687065
Trial 1	1.1	S_TWN	F	0:04:26.532-0:04:26.798	IT1	0.535334	8	2.00549
Trial 1	1.1	S_TWN	F	0:04:26.798-0:04:27.064	IT1	0.20003	8	0.749361
Trial 1	1.1	S_TWN	F	0:04:27.064-0:04:27.330	IT1	0.15871	8	0.594569
Trial 1	1.1	S_TWN	F	0:04:27.330-0:04:27.596	IT1	0.175737	8	0.658352
Trial 1	1.1	S_TWN	F	0:04:27.596-0:04:27.862	IT1	1.20805	8	4.52565
Trial 1	1.1	S_TWN	F	0:04:27.862-0:04:28.128	IT1	1.2701	8	4.75811
Trial 1	1.1	S_TWN	F	0:04:28.128-0:04:28.394	IT1	0.517542	8	1.93884
Trial 1	1.1	S_TWN	F	0:04:28.394-0:04:28.660	IT1	0.47183	8	1.7676
Trial 1	1.1	S_TWN	F	0:04:28.660-0:04:28.926	IT1	0.216713	8	0.81186
Trial 1	1.1	S_TWN	F	0:04:28.926-0:04:29.192	IT1	0.170685	8	0.639428
Trial 1	1.1	S_TWN	F	0:04:29.192-0:04:29.458	IT1	0.155879	8	0.583963
Trial 1	1.1	S_TWN	F	0:04:29.458-0:04:29.724	IT1	0.171142	8	0.641138
Trial 1	1.1	S_TWN	F	0:04:29.724-0:04:29.990	IT1	0.0918153	8	0.343964
Trial 1	1.1	S_TWN	F	0:04:29.990-0:04:30.256	IT1	0.0638289	8	0.239118
Trial 1	1.1	S_TWN	F	0:04:30.256-0:04:30.522	IT1	0.346407	8	1.29773
Trial 1	1.1	S_TWN	F	0:04:30.522-0:04:30.788	IT1	0.249414	8	0.934365
Trial 1	1.1	S_TWN	F	0:04:30.788-0:04:31.054	IT1	0.252528	8	0.946033
Trial 1	1.1	S_TWN	F	0:04:31.054-0:04:31.320	IT1	0.202341	8	0.758022
Trial 1	1.1	S_TWN	F	0:04:31.320-0:04:31.586	IT1	0.508227	8	1.90394
Trial 1	1.1	S_TWN	F	0:04:31.586-0:04:31.852	IT1	0.323945	8	1.21358
Trial 1	1.1	S_TWN	F	0:04:31.852-0:04:32.118	IT1	0.645901	8	2.4197
Trial 1	1.1	S_TWN	F	0:04:32.118-0:04:32.384	IT1	0.521947	8	1.95533
Trial 1	1.1	S_TWN	F	0:04:32.384-0:04:32.650	IT1	1.17195	8	4.39041
Trial 1	1.1	S_TWN	F	0:04:32.650-0:04:32.916	IT1	1.81118	8	6.78511
Trial 1	1.1	S_TWN	F	0:04:32.916-0:04:33.182	IT1	0.651591	8	2.44103
Trial 1	1.1	S_TWN	F	0:04:33.182-0:04:33.448	IT1	0.787873	8	2.95157
Trial 1	1.1	S_TWN	F	0:04:33.448-0:04:33.714	IT1	0.576764	8	2.1607
Trial 1	1.1	S_TWN	F	0:04:33.714-0:04:33.980	IT1	1.33317	8	4.99439
Trial 1	1.1	S_TWN	F	0:04:33.980-0:04:34.246	IT1	2.80805	8	10.5197
Trial 1	1.1	S_TWN	F	0:04:34.246-0:04:34.512	IT1	1.03652	8	3.88306
Trial 1	1.1	S_TWN	F	0:04:34.512-0:04:34.778	IT1	1.24245	8	4.65452
Trial 1	1.1	S_TWN	F	0:04:34.778-0:04:35.044	IT1	0.659444	8	2.47045
Trial 1	1.1	S_TWN	F	0:04:35.044-0:04:35.310	IT1	0.311622	8	1.16742
Trial 1	1.1	S_TWN	F	0:04:35.310-0:04:35.576	IT1	0.184831	8	0.692421
Trial 1	1.1	S_TWN	F	0:04:35.576-0:04:35.842	IT1	0.372149	7	1.59333
Trial 1	1.1	S_TWN	F	0:04:35.842-0:04:36.108	IT1	1.03364	8	3.87228
Trial 1	1.1	S_TWN	F	0:04:36.108-0:04:36.374	IT1	2.85799	8	10.7067
Trial 1	1.1	S_TWN	F	0:04:36.374-0:04:36.640	IT1	3.33178	8	12.4816
Trial 1	1.1	S_TWN	F	0:04:36.640-0:04:36.906	IT1	1.01599	8	3.80614
Trial 1	1.1	S_TWN	F	0:04:36.906-0:04:37.172	IT1	0.566222	8	2.12121
Trial 1	1.1	S_TWN	F	0:04:37.172-0:04:37.438	IT1	0.205306	8	0.769132
Trial 1	1.1	S_TWN	F	0:04:37.438-0:04:37.704	IT1	0.70667	8	2.64736
Trial 1	1.1	S_TWN	F	0:04:37.704-0:04:37.970	IT1	1.32362	8	4.9586
Trial 1	1.1	S_TWN	F	0:04:37.970-0:04:38.236	IT1	2.68523	8	10.0596
Trial 1	1.1	S_TWN	F	0:04:38.236-0:04:38.502	IT1	4.23603	8	15.8692
Trial 1	1.1	S_TWN	F	0:04:38.502-0:04:38.768	IT1	2.4042	8	9.00678
Trial 1	1.1	S_TWN	F	0:04:38.768-0:04:39.034	IT1	1.30103	8	4.87397
Trial 1	1.1	S_TWN	F	0:04:39.034-0:04:39.300	IT1	0.549789	8	2.05964
Trial 1	1.1	S_TWN	F	0:04:39.300-0:04:39.566	IT1	2.28816	8	8.57202
Trial 1	1.1	S_TWN	F	0:04:39.566-0:04:39.832	IT1	3.63781	8	13.6281
Trial 1	1.1	S_TWN	F	0:04:39.832-0:04:40.098	IT1	1.26253	8	4.72979
Trial 1	1.1	S_TWN	F	0:04:40.098-0:04:40.364	IT1	0.430337	8	1.61215
Trial 1	1.1	S_TWN	F	0:04:40.364-0:04:40.630	IT1	1.94262	8	7.27754
Trial 1	1.1	S_TWN	F	0:04:40.630-0:04:40.896	IT1	2.71218	8	10.1605
Trial 1	1.1	S_TWN	F	0:04:40.896-0:04:41.162	IT1	1.80257	8	6.75287
Trial 1	1.1	S_TWN	F	0:04:41.162-0:04:41.428	IT1	0.589489	8	2.20838
Trial 1	1.1	S_TWN	F	0:04:41.428-0:04:41.694	IT1	1.19806	8	4.48824
Trial 1	1.1	S_TWN	F	0:04:41.694-0:04:41.960	IT1	0.717223	8	2.6869
Trial 1	1.1	S_TWN	F	0:04:41.960-0:04:42.226	IT1	0.919796	8	3.44578
Trial 1	1.1	S_TWN	F	0:04:42.226-0:04:42.492	IT1	2.15026	8	8.0554
Trial 1	1.1	S_TWN	F	0:04:42.492-0:04:42.758	IT1	1.98326	8	7.42977
Trial 1	1.1	S_TWN	F	0:04:42.758-0:04:43.024	IT1	0.51479	8	1.92853
Trial 1	1.1	S_TWN	F	0:04:43.024-0:04:43.290	IT1	0.640518	8	2.39954
Trial 1	1.1	S_TWN	F	0:04:43.290-0:04:43.556	IT1	1.06477	8	3.98891
Trial 1	1.1	S_TWN	F	0:04:43.556-0:04:43.822	IT1	1.15319	8	4.32011
Trial 1	1.1	S_TWN	F	0:04:43.822-0:04:44.088	IT1	0.926506	8	3.47094
Trial 1	1.1	S_TWN	F	0:04:44.088-0:04:44.354	IT1	1.17501	8	4.40188
Trial 1	1.1	S_TWN	F	0:04:44.354-0:04:44.620	IT1	0.930877	8	3.4873
Trial 1	1.1	S_TWN	F	0:04:44.620-0:04:44.886	IT1	0.706324	8	2.64607
Trial 1	1.1	S_TWN	F	0:04:44.886-0:04:45.152	IT1	0.911575	8	3.41497
Trial 1	1.1	S_TWN	F	0:04:45.152-0:04:45.418	IT1	0.429637	7	1.83946
Trial 1	1.1	S_TWN	F	0:04:45.418-0:04:45.684	IT1	0.539082	8	2.01954
Trial 1	1.1	S_TWN	F	0:04:45.684-0:04:45.950	IT1	2.15302	8	8.06572
Trial 1	1.1	S_TWN	F	0:04:45.950-0:04:46.216	IT1	5.87082	8	21.9936
Trial 1	1.1	S_TWN	F	0:04:46.216-0:04:46.482	IT1	2.73882	8	10.2603
Trial 1	1.1	S_TWN	F	0:04:46.482-0:04:46.748	IT1	0.488371	8	1.82955
Trial 1	1.1	S_TWN	F	0:04:46.748-0:04:47.014	IT1	2.57503	8	9.64673
Trial 1	1.1	S_TWN	F	0:04:47.014-0:04:47.280	IT1	2.5863	8	9.68892
Trial 1	1.1	S_TWN	F	0:04:47.280-0:04:47.546	IT1	0.725763	8	2.7189
Trial 1	1.1	S_TWN	F	0:04:47.546-0:04:47.812	IT1	0.610692	8	2.2878
Trial 1	1.1	S_TWN	F	0:04:47.812-0:04:48.078	IT1	0.755203	8	2.82917
Trial 1	1.1	S_TWN	F	0:04:48.078-0:04:48.344	IT1	2.91325	8	10.9138
Trial 1	1.1	S_TWN	F	0:04:48.344-0:04:48.610	IT1	1.06399	8	3.98598
Trial 1	1.1	S_TWN	F	0:04:48.610-0:04:48.876	IT1	0.478037	8	1.79084
Trial 1	1.1	S_TWN	F	0:04:48.876-0:04:49.142	IT1	0.372743	8	1.39638
Trial 1	1.1	S_TWN	F	0:04:49.142-0:04:49.408	IT1	0.210906	8	0.790105
Trial 1	1.1	S_TWN	F	0:04:49.408-0:04:49.674	IT1	0.158054	8	0.592113
Trial 1	1.1	S_TWN	F	0:04:49.674-0:04:49.940	IT1	0.0747489	8	0.280027
Trial 1	1.1	S_TWN	F	0:04:49.940-0:04:50.206	IT1	0.0429018	8	0.160721
Trial 1	1.1	S_TWN	F	0:04:50.206-0:04:50.472	IT1	0.0766629	8	0.287197
Trial 1	1.1	S_TWN	F	0:04:50.472-0:04:50.738	IT1	0.225464	8	0.844641
Trial 1	1.1	S_TWN	F	0:04:50.738-0:04:51.004	IT1	0.158055	8	0.592116
Trial 1	1.1	S_TWN	F	0:04:51.004-0:04:51.270	IT1	0.538659	8	2.01794
Trial 1	1.1	S_TWN	F	0:04:51.270-0:04:51.536	IT1	1.65592	8	6.20352
Trial 1	1.1	S_TWN	F	0:04:51.536-0:04:51.802	IT1	1.20938	8	4.53063
Trial 1	1.1	S_TWN	F	0:04:51.802-0:04:52.068	IT1	0.562474	8	2.10716
Trial 1	1.1	S_TWN	F	0:04:52.068-0:04:52.334	IT1	1.61564	8	6.05262
Trial 1	1.1	S_TWN	F	0:04:52.334-0:04:52.600	IT1	1.63243	8	6.11547
Trial 1	1.1	S_TWN	F	0:04:52.600-0:04:52.866	IT1	1.41038	8	5.28363
Trial 1	1.1	S_TWN	F	0:04:52.866-0:04:53.132	IT1	0.435132	8	1.63011
Trial 1	1.1	S_TWN	F	0:04:53.132-0:04:53.398	IT1	0.39463	8	1.47838
Trial 1	1.1	S_TWN	F	0:04:53.398-0:04:53.664	IT1	0.493773	8	1.8498
Trial 1	1.1	S_TWN	F	0:04:53.664-0:04:53.930	IT1	0.833671	8	3.12312
Trial 1	1.1	S_TWN	F	0:04:53.930-0:04:54.196	IT1	0.37118	8	1.39053
Trial 1	1.1	S_TWN	F	0:04:54.196-0:04:54.462	IT1	0.657689	8	2.46387
Trial 1	1.1	S_TWN	F	0:04:54.462-0:04:54.728	IT1	0.87358	7	3.74017
Trial 1	1.1	S_TWN	F	0:04:54.728-0:04:54.994	IT1	1.02049	8	3.82302
Trial 1	1.1	S_TWN	F	0:04:54.994-0:04:55.260	IT1	0.422796	8	1.58391
Trial 1	1.1	S_TWN	F	0:04:55.260-0:04:55.526	IT1	0.435506	8	1.63151
Trial 1	1.1	S_TWN	F	0:04:55.526-0:04:55.792	IT1	0.705494	8	2.64295
Trial 1	1.1	S_TWN	F	0:04:55.792-0:04:56.058	IT1	1.21144	8	4.53833
Trial 1	1.1	S_TWN	F	0:04:56.058-0:04:56.324	IT1	1.0434	8	3.90884
Trial 1	1.1	S_TWN	F	0:04:56.324-0:04:56.590	IT1	0.487199	8	1.82517
Trial 1	1.1	S_TWN	F	0:04:56.590-0:04:56.856	IT1	0.141446	8	0.529894
Trial 1	1.1	S_TWN	F	0:04:56.856-0:04:57.122	IT1	0.146039	8	0.547101
Trial 1	1.1	S_TWN	F	0:04:57.122-0:04:57.388	IT1	0.216359	8	0.810532
Trial 1	1.1	S_TWN	F	0:04:57.388-0:04:57.654	IT1	0.982918	8	3.68223
Trial 1	1.1	S_TWN	F	0:04:57.654-0:04:57.920	IT1	0.930481	8	3.48582
Trial 1	1.1	S_TWN	F	0:04:57.920-0:04:58.186	IT1	1.58734	8	5.94657
Trial 1	1.1	S_TWN	F	0:04:58.186-0:04:58.452	IT1	1.83131	8	6.8606
Trial 1	1.1	S_TWN	F	0:04:58.452-0:04:58.718	IT1	2.22156	8	8.32251
Trial 1	1.1	S_TWN	F	0:04:58.718-0:04:58.984	IT1	2.97469	8	11.1439
Trial 1	1.1	S_TWN	F	0:04:58.984-0:04:59.250	IT1	4.21134	8	15.7768
Trial 1	1.1	S_TWN	F	0:04:59.250-0:04:59.516	IT1	0.703736	8	2.63636
Trial 1	1.1	S_TWN	F	0:04:59.516-0:04:59.782	IT1	0.895577	8	3.35508
Trial 1	1.1	S_TWN	F	0:04:59.782-0:05:00.048	IT1	0.555114	8	2.07958
Trial 1	1.1	S_TWN	F	0:05:00.048-0:05:00.314	IT1	0.332686	8	1.24632
Trial 1	1.1	S_TWN	F	0:05:00.314-0:05:00.580	IT1	0.30042	8	1.12544
Trial 1	1.1	S_TWN	F	0:05:00.580-0:05:00.846	IT1	0.527695	8	1.97688
Trial 1	1.1	S_TWN	F	0:05:00.846-0:05:01.112	IT1	1.15599	8	4.33062
Trial 1	1.1	S_TWN	F	0:05:01.112-0:05:01.378	IT1	0.520205	8	1.94882
Trial 1	1.1	S_TWN	F	0:05:01.378-0:05:01.644	IT1	0.584085	8	2.18813
Trial 1	1.1	S_TWN	F	0:05:01.644-0:05:01.910	IT1	0.332148	8	1.24431
Trial 1	1.1	S_TWN	F	0:05:01.910-0:05:02.176	IT1	0.23989	8	0.89869
Trial 1	1.1	S_TWN	F	0:05:02.176-0:05:02.442	IT1	0.133788	8	0.501205
Trial 1	1.1	S_TWN	F	0:05:02.442-0:05:02.708	IT1	0.0804142	8	0.301251
Trial 1	1.1	S_TWN	F	0:05:02.708-0:05:02.974	IT1	0.179327	8	0.671806
Trial 1	1.1	S_TWN	F	0:05:02.974-0:05:03.240	IT1	0.0567778	8	0.212705
Trial 1	1.1	S_TWN	F	0:05:03.240-0:05:03.506	IT1	0.202727	8	0.759464
Trial 1	1.1	S_TWN	F	0:05:03.506-0:05:03.772	IT1	0.120127	8	0.450026
Trial 1	1.1	S_TWN	F	0:05:03.772-0:05:04.038	IT1	0.347079	8	1.30025
Trial 1	1.1	S_TWN	F	0:05:04.038-0:05:04.304	IT1	0.191924	7	0.821704
Trial 1	1.1	S_TWN	F	0:05:04.304-0:05:04.570	IT1	0.609006	8	2.28149
Trial 1	1.1	S_TWN	F	0:05:04.570-0:05:04.836	IT1	0.517537	8	1.93882
Trial 1	1.1	S_TWN	F	0:05:04.836-0:05:05.102	IT1	0.304606	8	1.14112
Trial 1	1.1	S_TWN	F	0:05:05.102-0:05:05.368	IT1	0.273018	8	1.02279
Trial 1	1.1	S_TWN	F	0:05:05.368-0:05:05.634	IT1	0.120546	8	0.451594
Trial 1	1.1	S_TWN	F	0:05:05.634-0:05:05.900	IT1	0.22636	8	0.848005
Trial 1	1.1	S_TWN	F	0:05:05.900-0:05:06.166	IT1	0.160045	8	0.599571
Trial 1	1.1	S_TWN	F	0:05:06.166-0:05:06.432	IT1	0.253701	8	0.950426
Trial 1	1.1	S_TWN	F	0:05:06.432-0:05:06.698	IT1	0.329491	8	1.23436
Trial 1	1.1	S_TWN	F	0:05:06.698-0:05:06.964	IT1	0.978943	8	3.66735
Trial 1	1.1	S_TWN	F	0:05:06.964-0:05:07.230	IT1	2.38098	8	8.91976
Trial 1	1.1	S_TWN	F	0:05:07.230-0:05:07.496	IT1	1.24747	8	4.67333
Trial 1	1.1	S_TWN	F	0:05:07.496-0:05:07.762	IT1	0.213538	8	0.799967
Trial 1	1.1	S_TWN	F	0:05:07.762-0:05:08.028	IT1	0.141476	8	0.530003
Trial 1	1.1	S_TWN	F	0:05:08.028-0:05:08.294	IT1	0.241402	8	0.904351
Trial 1	1.1	S_TWN	F	0:05:08.294-0:05:08.560	IT1	0.265285	8	0.99383
Trial 1	1.1	S_TWN	F	0:05:08.560-0:05:08.826	IT1	0.329343	8	1.2338
Trial 1	1.1	S_TWN	F	0:05:08.826-0:05:09.092	IT1	0.289354	8	1.08399
Trial 1	1.1	S_TWN	F	0:05:09.092-0:05:09.358	IT1	0.363666	8	1.36239
Trial 1	1.1	S_TWN	F	0:05:09.358-0:05:09.624	IT1	0.112663	8	0.422064
Trial 1	1.1	S_TWN	F	0:05:09.624-0:05:09.890	IT1	0.0984743	8	0.368909
Trial 1	1.1	S_TWN	F	0:05:09.890-0:05:10.156	IT1	0.15627	8	0.585423
Trial 1	1.1	S_TWN	F	0:05:10.156-0:05:10.422	IT1	0.0823869	8	0.30864
Trial 1	1.1	S_TWN	F	0:05:10.422-0:05:10.688	IT1	0.214467	8	0.803446
Trial 1	1.1	S_TWN	F	0:05:10.688-0:05:10.954	IT1	0.0202562	8	0.0758845
Trial 1	1.1	S_TWN	F	0:05:10.954-0:05:11.220	IT1	0.392929	8	1.47202
Trial 1	1.1	S_TWN	F	0:05:11.220-0:05:11.486	IT1	0.952248	8	3.56735
Trial 1	1.1	S_TWN	F	0:05:11.486-0:05:11.752	IT1	0.41866	8	1.5684
Trial 1	1.1	S_TWN	F	0:05:11.752-0:05:12.018	IT1	0.328122	8	1.22922
Trial 1	1.1	S_TWN	F	0:05:12.018-0:05:12.284	IT1	0.279864	8	1.04844
Trial 1	1.1	S_TWN	F	0:05:12.284-0:05:12.550	IT1	0.278453	8	1.04315
Trial 1	1.1	S_TWN	F	0:05:12.550-0:05:12.816	IT1	0.145857	8	0.546416
Trial 1	1.1	S_TWN	F	0:05:12.816-0:05:13.082	IT1	0.215906	8	0.808837
Trial 1	1.1	S_TWN	F	0:05:13.082-0:05:13.348	IT1	0.219562	8	0.822537
Trial 1	1.1	S_TWN	F	0:05:13.348-0:05:13.614	IT1	0.155064	8	0.580909
Trial 1	1.1	S_TWN	F	0:05:13.614-0:05:13.880	IT1	0.0805432	7	0.344838
Trial 1	1.1	S_TWN	F	0:05:13.880-0:05:14.146	IT1	0.0899163	8	0.336851
Trial 1	1.1	S_TWN	F	0:05:14.146-0:05:14.412	IT1	0.102504	8	0.384004
Trial 1	1.1	S_TWN	F	0:05:14.412-0:05:14.678	IT1	0.172456	8	0.646064
Trial 1	1.1	S_TWN	F	0:05:14.678-0:05:14.944	IT1	0.182617	8	0.684137
Trial 1	1.1	S_TWN	F	0:05:14.944-0:05:15.210	IT1	0.135768	8	0.50862
Trial 1	1.1	S_TWN	F	0:05:15.210-0:05:15.476	IT1	0.146477	8	0.548739
Trial 1	1.1	S_TWN	F	0:05:15.476-0:05:15.742	IT1	0.0807736	8	0.302599
Trial 1	1.1	S_TWN	F	0:05:15.742-0:05:16.008	IT1	0.344331	8	1.28994
Trial 1	1.1	S_TWN	F	0:05:16.008-0:05:16.274	IT1	0.220371	8	0.825567
Trial 1	1.1	S_TWN	F	0:05:16.274-0:05:16.540	IT1	0.326383	8	1.22271
Trial 1	1.1	S_TWN	F	0:05:16.540-0:05:16.806	IT1	0.293502	8	1.09953
Trial 1	1.1	S_TWN	F	0:05:16.806-0:05:17.072	IT1	0.418883	8	1.56924
Trial 1	1.1	S_TWN	F	0:05:17.072-0:05:17.338	IT1	0.762485	8	2.85646
Trial 1	1.1	S_TWN	F	0:05:17.338-0:05:17.604	IT1	0.35909	8	1.34525
Trial 1	1.1	S_TWN	F	0:05:17.604-0:05:17.870	IT1	0.28759	8	1.07738
Trial 1	1.1	S_TWN	F	0:05:17.870-0:05:18.136	IT1	0.467501	8	1.75138
Trial 1	1.1	S_TWN	F	0:05:18.136-0:05:18.402	IT1	2.94539	8	11.0342
Trial 1	1.1	S_TWN	F	0:05:18.402-0:05:18.668	IT1	2.20423	8	8.25759
Trial 1	1.1	S_TWN	F	0:05:18.668-0:05:18.934	IT1	2.53529	8	9.49785
Trial 1	1.1	S_TWN	F	0:05:18.934-0:05:19.200	IT1	2.74081	8	10.2677
Trial 1	1.1	S_TWN	F	0:05:19.200-0:05:19.466	IT1	3.03754	8	11.3794
Trial 1	1.1	S_TWN	F	0:05:19.466-0:05:19.732	IT1	0.66007	8	2.47278
Trial 1	1.1	S_TWN	F	0:05:19.732-0:05:19.998	IT1	2.37422	8	8.89438
Trial 1	1.1	S_TWN	F	0:05:19.998-0:05:20.264	IT1	1.9514	8	7.31047
Trial 1	1.1	S_TWN	F	0:05:20.264-0:05:20.530	IT1	2.17712	8	8.156
Trial 1	1.1	S_TWN	F	0:05:20.530-0:05:20.796	IT1	2.45982	8	9.21513
Trial 1	1.1	S_TWN	F	0:05:20.796-0:05:21.062	IT1	1.01353	8	3.79695
Trial 1	1.1	S_TWN	F	0:05:21.062-0:05:21.328	IT1	0.748153	8	2.80277
Trial 1	1.1	S_TWN	F	0:05:21.328-0:05:21.594	IT1	0.208943	8	0.782751
Trial 1	1.1	S_TWN	F	0:05:21.594-0:05:21.860	IT1	1.05255	8	3.9431
Trial 1	1.1	S_TWN	F	0:05:21.860-0:05:22.126	IT1	2.94426	8	11.03
Trial 1	1.1	S_TWN	F	0:05:22.126-0:05:22.392	IT1	3.89938	8	14.608
Trial 1	1.1	S_TWN	F	0:05:22.392-0:05:22.658	IT1	0.605877	8	2.26976
Trial 1	1.1	S_TWN	F	0:05:22.658-0:05:22.924	IT1	2.4971	8	9.35476
Trial 1	1.1	S_TWN	F	0:05:22.924-0:05:23.190	IT1	4.39306	8	16.4575
Trial 1	1.1	S_TWN	F	0:05:23.190-0:05:23.456	IT1	1.39369	7	5.96698
Trial 1	1.1	S_TWN	F	0:05:23.456-0:05:23.722	IT1	1.6733	8	6.26862
Trial 1	1.1	S_TWN	F	0:05:23.722-0:05:23.988	IT1	3.72408	8	13.9513
Trial 1	1.1	S_TWN	F	0:05:23.988-0:05:24.254	IT1	4.36491	8	16.3521
Trial 1	1.1	S_TWN	F	0:05:24.254-0:05:24.520	IT1	1.92284	8	7.20341
Trial 1	1.1	S_TWN	F	0:05:24.520-0:05:24.786	IT1	1.38321	8	5.18184
Trial 1	1.1	S_TWN	F	0:05:24.786-0:05:25.052	IT1	0.887508	8	3.32484
Trial 1	1.1	S_TWN	F	0:05:25.052-0:05:25.318	IT1	0.158503	8	0.593793
Trial 1	1.1	S_TWN	F	0:05:25.318-0:05:25.584	IT1	0.271696	8	1.01784
Trial 1	1.1	S_TWN	F	0:05:25.584-0:05:25.850	IT1	0.231682	8	0.867935
Trial 1	1.1	S_TWN	F	0:05:25.850-0:05:26.116	IT1	0.535427	8	2.00584
Trial 1	1.1	S_TWN	F	0:05:26.116-0:05:26.382	IT1	1.42563	8	5.34078
Trial 1	1.1	S_TWN	F	0:05:26.382-0:05:26.648	IT1	3.12585	8	11.7102
Trial 1	1.1	S_TWN	F	0:05:26.648-0:05:26.914	IT1	1.91887	8	7.18859
Trial 1	1.1	S_TWN	F	0:05:26.914-0:05:27.180	IT1	0.560595	8	2.10012
Trial 1	1.1	S_TWN	F	0:05:27.180-0:05:27.446	IT1	0.775815	8	2.9064
Trial 1	1.1	S_TWN	F	0:05:27.446-0:05:27.712	IT1	1.88853	8	7.07491
Trial 1	1.1	S_TWN	F	0:05:27.712-0:05:27.978	IT1	1.89153	8	7.08613
Trial 1	1.1	S_TWN	F	0:05:27.978-0:05:28.244	IT1	2.25832	8	8.46024
Trial 1	1.1	S_TWN	F	0:05:28.244-0:05:28.510	IT1	0.998335	8	3.74002
Trial 1	1.1	S_TWN	F	0:05:28.510-0:05:28.776	IT1	0.393451	8	1.47396
Trial 1	1.1	S_TWN	F	0:05:28.776-0:05:29.042	IT1	0.901588	8	3.37758
Trial 1	1.1	S_TWN	F	0:05:29.042-0:05:29.308	IT1	2.25724	8	8.45616
Trial 1	1.1	S_TWN	F	0:05:29.308-0:05:29.574	IT1	1.42103	8	5.32354
Trial 1	1.1	S_TWN	F	0:05:29.574-0:05:29.840	IT1	1.21035	8	4.53425
Trial 1	1.1	S_TWN	F	0:05:29.840-0:05:30.106	IT1	0.908378	8	3.40301
Trial 1	1.1	S_TWN	F	0:05:30.106-0:05:30.372	IT1	0.978149	8	3.66439
Trial 1	1.1	S_TWN	F	0:05:30.372-0:05:30.638	IT1	0.659536	8	2.47078
Trial 1	1.1	S_TWN	F	0:05:30.638-0:05:30.904	IT1	1.31766	8	4.93632
Trial 1	1.1	S_TWN	F	0:05:30.904-0:05:31.170	IT1	0.745892	8	2.79429
Trial 1	1.1	S_TWN	F	0:05:31.170-0:05:31.436	IT1	0.478076	8	1.79099
Trial 1	1.1	S_TWN	F	0:05:31.436-0:05:31.702	IT1	0.303567	8	1.13724
Trial 1	1.1	S_TWN	F	0:05:31.702-0:05:31.968	IT1	1.94316	8	7.27954
Trial 1	1.1	S_TWN	F	0:05:31.968-0:05:32.234	IT1	5.12236	8	19.1897
Trial 1	1.1	S_TWN	F	0:05:32.234-0:05:32.500	IT1	3.45167	8	12.9308
Trial 1	1.1	S_TWN	F	0:05:32.500-0:05:32.766	IT1	1.41571	7	6.06126
Trial 1	1.1	S_TWN	F	0:05:32.766-0:05:33.032	IT1	0.355169	8	1.33055
Trial 1	1.1	S_TWN	F	0:05:33.032-0:05:33.298	IT1	1.1567	8	4.33327
Trial 1	1.1	S_TWN	F	0:05:33.298-0:05:33.564	IT1	0.868615	8	3.25404
Trial 1	1.1	S_TWN	F	0:05:33.564-0:05:33.830	IT1	1.19095	8	4.46159
Trial 1	1.1	S_TWN	F	0:05:33.830-0:05:34.096	IT1	1.14031	8	4.27185
Trial 1	1.1	S_TWN	F	0:05:34.096-0:05:34.362	IT1	1.13735	8	4.26077
Trial 1	1.1	S_TWN	F	0:05:34.362-0:05:34.628	IT1	1.33664	8	5.00741
Trial 1	1.1	S_TWN	F	0:05:34.628-0:05:34.894	IT1	0.492861	8	1.84638
Trial 1	1.1	S_TWN	F	0:05:34.894-0:05:35.160	IT1	0.358634	8	1.34354
Trial 1	1.1	S_TWN	F	0:05:35.160-0:05:35.426	IT1	0.511591	8	1.91654
Trial 1	1.1	S_TWN	F	0:05:35.426-0:05:35.692	IT1	0.361494	8	1.35425
Trial 1	1.1	S_TWN	F	0:05:35.692-0:05:35.958	IT1	0.668153	8	2.50307
Trial 1	1.1	S_TWN	F	0:05:35.958-0:05:36.224	IT1	0.34281	8	1.28425
Trial 1	1.1	S_TWN	F	0:05:36.224-0:05:36.490	IT1	0.294856	8	1.10461
Trial 1	1.1	S_TWN	F	0:05:36.490-0:05:36.756	IT1	0.145489	8	0.545041
Trial 1	1.1	S_TWN	F	0:05:36.756-0:05:37.022	IT1	0.217702	8	0.815567
Trial 1	1.1	S_TWN	F	0:05:37.022-0:05:37.288	IT1	0.322161	8	1.2069
Trial 1	1.1	S_TWN	F	0:05:37.288-0:05:37.554	IT1	0.74895	8	2.80575
Trial 1	1.1	S_TWN	F	0:05:37.554-0:05:37.820	IT1	0.295755	8	1.10798
Trial 1	1.1	S_TWN	F	0:05:37.820-0:05:38.086	IT1	0.273337	8	1.02399
Trial 1	1.1	S_TWN	F	0:05:38.086-0:05:38.352	IT1	0.295828	8	1.10825
Trial 1	1.1	S_TWN	F	0:05:38.352-0:05:38.618	IT1	0.573882	8	2.14991
Trial 1	1.1	S_TWN	F	0:05:38.618-0:05:38.884	IT1	0.234986	8	0.880311
Trial 1	1.1	S_TWN	F	0:05:38.884-0:05:39.150	IT1	0.220288	8	0.825251
Trial 1	1.1	S_TWN	F	0:05:39.150-0:05:39.416	IT1	0.108782	8	0.407521
Trial 1	1.1	S_TWN	F	0:05:39.416-0:05:39.682	IT1	0.187913	8	0.703964
Trial 1	1.1	S_TWN	F	0:05:39.682-0:05:39.948	IT1	0.594826	8	2.22837
Trial 1	1.1	S_TWN	F	0:05:39.948-0:05:40.214	IT1	0.4853	8	1.81805
Trial 1	1.1	S_TWN	F	0:05:40.214-0:05:40.480	IT1	0.782843	8	2.93273
Trial 1	1.1	S_TWN	F	0:05:40.480-0:05:40.746	IT1	0.889679	8	3.33295
Trial 1	1.1	S_TWN	F	0:05:40.746-0:05:41.012	IT1	0.356243	8	1.33457
Trial 1	1.1	S_TWN	F	0:05:41.012-0:05:41.278	IT1	0.241115	8	0.903274
Trial 1	1.1	S_TWN	F	0:05:41.278-0:05:41.544	IT1	0.189743	8	0.710819
Trial 1	1.1	S_TWN	F	0:05:41.544-0:05:41.810	IT1	0.723506	8	2.71044
Trial 1	1.1	S_TWN	F	0:05:41.810-0:05:42.076	IT1	1.63881	8	6.13936
Trial 1	1.1	S_TWN	F	0:05:42.076-0:05:42.342	IT1	0.87711	7	3.75528
Trial 1	1.1	S_TWN	F	0:05:42.342-0:05:42.608	IT1	1.31578	8	4.92927
Trial 1	1.1	S_TWN	F	0:05:42.608-0:05:42.874	IT1	0.883336	8	3.30919
Trial 1	1.1	S_TWN	F	0:05:42.874-0:05:43.140	IT1	0.637408	8	2.38789
Trial 1	1.1	S_TWN	F	0:05:43.140-0:05:43.406	IT1	0.485454	8	1.81864
Trial 1	1.1	S_TWN	F	0:05:43.406-0:05:43.672	IT1	1.27244	8	4.76688
Trial 1	1.1	S_TWN	F	0:05:43.672-0:05:43.938	IT1	1.14952	8	4.30639
Trial 1	1.1	S_TWN	F	0:05:43.938-0:05:44.204	IT1	0.638812	8	2.39314
Trial 1	1.1	S_TWN	F	0:05:44.204-0:05:44.470	IT1	0.712116	8	2.66778
Trial 1	1.1	S_TWN	F	0:05:44.470-0:05:44.736	IT1	1.86361	8	6.98157
Trial 1	1.1	S_TWN	F	0:05:44.736-0:05:45.002	IT1	0.164073	8	0.614657
Trial 1	1.1	S_TWN	F	0:05:45.002-0:05:45.268	IT1	0.164073	8	0.614659
Trial 1	1.1	S_TWN	F	0:05:45.268-0:05:45.534	IT1	0.164073	8	0.614657
Trial 1	1.1	S_TWN	F	0:05:45.534-0:05:45.800	IT1	0.856901	8	3.21016
Trial 1	1.1	S_TWN	F	0:05:45.800-0:05:46.066	IT1	1.00815	8	3.77679
Trial 1	1.1	S_TWN	F	0:05:46.066-0:05:46.332	IT1	0.790659	8	2.96201
Trial 1	1.1	S_TWN	F	0:05:46.332-0:05:46.598	IT1	1.77866	8	6.6633
Trial 1	1.1	S_TWN	F	0:05:46.598-0:05:46.864	IT1	0.223045	8	0.83558
Trial 1	1.1	S_TWN	F	0:05:46.864-0:05:47.130	IT1	0.679269	8	2.54471
Trial 1	1.1	S_TWN	F	0:05:47.130-0:05:47.396	IT1	1.8407	8	6.89574
Trial 1	1.1	S_TWN	F	0:05:47.396-0:05:47.662	IT1	1.00894	8	3.77974
Trial 1	1.1	S_TWN	F	0:05:47.662-0:05:47.928	IT1	2.12975	8	7.97859
Trial 1	1.1	S_TWN	F	0:05:47.928-0:05:48.194	IT1	0.560605	8	2.10016
Trial 1	1.1	S_TWN	F	0:05:48.194-0:05:48.460	IT1	0.361653	8	1.35484
Trial 1	1.1	S_TWN	F	0:05:48.460-0:05:48.726	IT1	1.35537	8	5.07757
Trial 1	1.1	S_TWN	F	0:05:48.726-0:05:48.992	IT1	0.812606	8	3.04422
Trial 1	1.1	S_TWN	F	0:05:48.992-0:05:49.258	IT1	0.678588	8	2.54217
Trial 1	1.1	S_TWN	F	0:05:49.258-0:05:49.524	IT1	0.642731	8	2.40783
Trial 1	1.1	S_TWN	F	0:05:49.524-0:05:49.790	IT1	3.15275	8	11.811
Trial 1	1.1	S_TWN	F	0:05:49.790-0:05:50.056	IT1	1.17753	8	4.41132
Trial 1	1.1	S_TWN	F	0:05:50.056-0:05:50.322	IT1	0.604401	8	2.26424
Trial 1	1.1	S_TWN	F	0:05:50.322-0:05:50.588	IT1	0.412763	8	1.54632
Trial 1	1.1	S_TWN	F	0:05:50.588-0:05:50.854	IT1	0.262673	8	0.984038
Trial 1	1.1	S_TWN	F	0:05:50.854-0:05:51.120	IT1	0.829269	8	3.10665
Trial 1	1.1	S_TWN	F	0:05:51.120-0:05:51.386	IT1	0.688218	8	2.57824
Trial 1	1.1	S_TWN	F	0:05:51.386-0:05:51.652	IT1	0.199449	8	0.747181
Trial 1	1.1	S_TWN	F	0:05:51.652-0:05:51.918	IT1	0.665836	7	2.85073
Trial 1	1.1	S_TWN	F	0:05:51.918-0:05:52.184	IT1	0.743295	8	2.78457
Trial 1	1.1	S_TWN	F	0:05:52.184-0:05:52.450	IT1	0.332107	8	1.24416
Trial 1	1.1	S_TWN	F	0:05:52.450-0:05:52.716	IT1	0.477647	8	1.78939
Trial 1	1.1	S_TWN	F	0:05:52.716-0:05:52.982	IT1	0.233179	8	0.873546
Trial 1	1.1	S_TWN	F	0:05:52.982-0:05:53.248	IT1	0.331578	8	1.24218
Trial 1	1.1	S_TWN	F	0:05:53.248-0:05:53.514	IT1	0.100438	8	0.376264
Trial 1	1.1	S_TWN	F	0:05:53.514-0:05:53.780	IT1	0.0877795	8	0.328843
Trial 1	1.1	S_TWN	F	0:05:53.780-0:05:54.046	IT1	0.530907	8	1.98891
Trial 1	1.1	S_TWN	F	0:05:54.046-0:05:54.312	IT1	2.33215	8	8.73683
Trial 1	1.1	S_TWN	F	0:05:54.312-0:05:54.578	IT1	3.2379	8	12.13
Trial 1	1.1	S_TWN	F	0:05:54.578-0:05:54.844	IT1	0.567672	8	2.12666
Trial 1	1.1	S_TWN	F	0:05:54.844-0:05:55.110	IT1	0.500241	8	1.87402
Trial 1	1.1	S_TWN	F	0:05:55.110-0:05:55.376	IT1	1.35908	8	5.09141
Trial 1	1.1	S_TWN	F	0:05:55.376-0:05:55.642	IT1	0.830266	8	3.11039
Trial 1	1.1	S_TWN	F	0:05:55.642-0:05:55.908	IT1	1.72502	8	6.46233
Trial 1	1.1	S_TWN	F	0:05:55.908-0:05:56.174	IT1	3.42033	8	12.8135
Trial 1	1.1	S_TWN	F	0:05:56.174-0:05:56.440	IT1	3.48931	8	13.0718
Trial 1	1.1	S_TWN	F	0:05:56.440-0:05:56.706	IT1	1.55888	8	5.83995
Trial 1	1.1	S_TWN	F	0:05:56.706-0:05:56.972	IT1	1.06179	8	3.97774
Trial 1	1.1	S_TWN	F	0:05:56.972-0:05:57.238	IT1	0.638583	8	2.39228
Trial 1	1.1	S_TWN	F	0:05:57.238-0:05:57.504	IT1	0.442753	8	1.65866
Trial 1	1.1	S_TWN	F	0:05:57.504-0:05:57.770	IT1	0.634231	8	2.37599
Trial 1	1.1	S_TWN	F	0:05:57.770-0:05:58.036	IT1	0.915672	8	3.43032
Trial 1	1.1	S_TWN	F	0:05:58.036-0:05:58.302	IT1	0.732544	8	2.7443
Trial 1	1.1	S_TWN	F	0:05:58.302-0:05:58.568	IT1	1.27014	8	4.75826
Trial 1	1.1	S_TWN	F	0:05:58.568-0:05:58.834	IT1	3.71208	8	13.9064
Trial 1	1.1	S_TWN	F	0:05:58.834-0:05:59.100	IT1	1.46747	8	5.49751
Trial 1	1.1	S_TWN	F	0:05:59.100-0:05:59.366	IT1	1.05327	8	3.94579
Trial 1	1.1	S_TWN	F	0:05:59.366-0:05:59.632	IT1	0.335949	8	1.25855
Trial 1	1.1	S_TWN	F	0:05:59.632-0:05:59.898	IT1	0.426122	8	1.59636
Trial 1	1.1	S_TWN	F	0:05:59.898-0:06:00.164	IT1	0.253381	8	0.949231
Trial 1	1.1	S_TWN	F	0:06:00.164-0:06:00.430	IT1	0.110155	8	0.412668
Trial 1	1.1	S_TWN	F	0:06:00.430-0:06:00.696	IT1	0.0856808	8	0.320981
Trial 1	1.1	S_TWN	F	0:06:00.696-0:06:00.962	IT1	0.124235	8	0.465416
Trial 1	1.1	S_TWN	F	0:06:00.962-0:06:01.228	IT1	0.192585	8	0.721473
Trial 1	1.1	S_TWN	F	0:06:01.228-0:06:01.494	IT1	0.379042	7	1.62285
Trial 1	1.1	S_TWN	F	0:06:01.494-0:06:01.760	IT1	0.254226	8	0.952398
Trial 1	1.1	S_TWN	F	0:06:01.760-0:06:02.026	IT1	0.179739	8	0.673348
Trial 1	1.1	S_TWN	F	0:06:02.026-0:06:02.292	IT1	0.373752	8	1.40017
Trial 1	1.1	S_TWN	F	0:06:02.292-0:06:02.558	IT1	0.376634	8	1.41096
Trial 1	1.1	S_TWN	F	0:06:02.558-0:06:02.824	IT1	0.264517	8	0.990944
Trial 1	1.1	S_TWN	F	0:06:02.824-0:06:03.090	IT1	0.21404	8	0.801847
Trial 1	1.1	S_TWN	F	0:06:03.090-0:06:03.356	IT1	0.124833	8	0.467654
Trial 1	1.1	S_TWN	F	0:06:03.356-0:06:03.622	IT1	0.194706	8	0.729418
Trial 1	1.1	S_TWN	F	0:06:03.622-0:06:03.888	IT1	0.0418918	8	0.156937
Trial 1	1.1	S_TWN	F	0:06:03.888-0:06:04.154	IT1	0.142211	8	0.532759
Trial 1	1.1	S_TWN	F	0:06:04.154-0:06:04.420	IT1	0.161889	8	0.606478
Trial 1	1.1	S_TWN	F	0:06:04.420-0:06:04.686	IT1	0.137703	8	0.515867
Trial 1	1.1	S_TWN	F	0:06:04.686-0:06:04.952	IT1	0.111273	8	0.416859
Trial 1	1.1	S_TWN	F	0:06:04.952-0:06:05.218	IT1	0.186707	8	0.699453
Trial 1	1.1	S_TWN	F	0:06:05.218-0:06:05.484	IT1	0.119656	8	0.448258
Trial 1	1.1	S_TWN	F	0:06:05.484-0:06:05.750	IT1	0.246599	8	0.923823
Trial 1	1.1	S_TWN	F	0:06:05.750-0:06:06.016	IT1	0.376047	8	1.40876
Trial 1	1.1	S_TWN	F	0:06:06.016-0:06:06.282	IT1	0.412372	8	1.54486
Trial 1	1.1	S_TWN	F	0:06:06.282-0:06:06.548	IT1	0.885466	8	3.31717
Trial 1	1.1	S_TWN	F	0:06:06.548-0:06:06.814	IT1	1.1332	8	4.24525
Trial 1	1.1	S_TWN	F	0:06:06.814-0:06:07.080	IT1	0.480158	8	1.79879
Trial 1	1.1	S_TWN	F	0:06:07.080-0:06:07.346	IT1	0.28448	8	1.06574
Trial 1	1.1	S_TWN	F	0:06:07.346-0:06:07.612	IT1	0.166897	8	0.625238
Trial 1	1.1	S_TWN	F	0:06:07.612-0:06:07.878	IT1	0.0917855	8	0.34385
Trial 1	1.1	S_TWN	F	0:06:07.878-0:06:08.144	IT1	0.304525	8	1.14082
Trial 1	1.1	S_TWN	F	0:06:08.144-0:06:08.410	IT1	0.511453	8	1.91604
Trial 1	1.1	S_TWN	F	0:06:08.410-0:06:08.676	IT1	0.30992	8	1.16103
Trial 1	1.1	S_TWN	F	0:06:08.676-0:06:08.942	IT1	0.344037	8	1.28886
Trial 1	1.1	S_TWN	F	0:06:08.942-0:06:09.208	IT1	0.399927	8	1.49822
Trial 1	1.1	S_TWN	F	0:06:09.208-0:06:09.474	IT1	0.368616	8	1.38092
Trial 1	1.1	S_TWN	F	0:06:09.474-0:06:09.740	IT1	2.26724	8	8.49367
Trial 1	1.1	S_TWN	F	0:06:09.740-0:06:10.006	IT1	1.98221	8	7.42585
Trial 1	1.1	S_TWN	F	0:06:10.006-0:06:10.272	IT1	0.73359	8	2.74822
Trial 1	1.1	S_TWN	F	0:06:10.272-0:06:10.538	IT1	1.0946	8	4.10063
Trial 1	1.1	S_TWN	F	0:06:10.538-0:06:10.804	IT1	0.686482	7	2.93912
Trial 1	1.1	S_TWN	F	0:06:10.804-0:06:11.070	IT1	0.68086	8	2.55067
Trial 1	1.1	S_TWN	F	0:06:11.070-0:06:11.336	IT1	0.274406	8	1.028
Trial 1	1.1	S_TWN	F	0:06:11.336-0:06:11.602	IT1	0.214237	8	0.802586
Trial 1	1.1	S_TWN	F	0:06:11.602-0:06:11.868	IT1	1.37288	8	5.14318
Trial 1	1.1	S_TWN	F	0:06:11.868-0:06:12.134	IT1	1.34435	8	5.03627
Trial 1	1.1	S_TWN	F	0:06:12.134-0:06:12.400	IT1	0.791014	8	2.96334
Trial 1	1.1	S_TWN	F	0:06:12.400-0:06:12.666	IT1	0.424017	8	1.58848
Trial 1	1.1	S_TWN	F	0:06:12.666-0:06:12.932	IT1	0.281032	8	1.05282
Trial 1	1.1	S_TWN	F	0:06:12.932-0:06:13.198	IT1	0.242594	8	0.90882
Trial 1	1.1	S_TWN	F	0:06:13.198-0:06:13.464	IT1	0.544713	8	2.04062
Trial 1	1.1	S_TWN	F	0:06:13.464-0:06:13.730	IT1	1.42256	8	5.32926
Trial 1	1.1	S_TWN	F	0:06:13.730-0:06:13.996	IT1	0.419997	8	1.57342
Trial 1	1.1	S_TWN	F	0:06:13.996-0:06:14.262	IT1	0.726093	8	2.72012
Trial 1	1.1	S_TWN	F	0:06:14.262-0:06:14.528	IT1	0.284225	8	1.06477
Trial 1	1.1	S_TWN	F	0:06:14.528-0:06:14.794	IT1	0.338068	8	1.26649
Trial 1	1.1	S_TWN	F	0:06:14.794-0:06:15.060	IT1	0.599765	8	2.24686
Trial 1	1.1	S_TWN	F	0:06:15.060-0:06:15.326	IT1	0.26625	8	0.997437
Trial 1	1.1	S_TWN	F	0:06:15.326-0:06:15.592	IT1	0.198574	8	0.743906
Trial 1	1.1	S_TWN	F	0:06:15.592-0:06:15.858	IT1	0.383788	8	1.43777
Trial 1	1.1	S_TWN	F	0:06:15.858-0:06:16.124	IT1	0.478493	8	1.79256
Trial 1	1.1	S_TWN	F	0:06:16.124-0:06:16.390	IT1	0.24875	8	0.931881
Trial 1	1.1	S_TWN	F	0:06:16.390-0:06:16.656	IT1	0.123447	8	0.462463
Trial 1	1.1	S_TWN	F	0:06:16.656-0:06:16.922	IT1	0.0778263	8	0.291558
Trial 1	1.1	S_TWN	F	0:06:16.922-0:06:17.188	IT1	0.0865788	8	0.324347
Trial 1	1.1	S_TWN	F	0:06:17.188-0:06:17.454	IT1	0.164904	8	0.617771
Trial 1	1.1	S_TWN	F	0:06:17.454-0:06:17.720	IT1	0.253602	8	0.950057
Trial 1	1.1	S_TWN	F	0:06:17.720-0:06:17.986	IT1	0.133553	8	0.500325
Trial 1	1.1	S_TWN	F	0:06:17.986-0:06:18.252	IT1	0.144325	8	0.540675
Trial 1	1.1	S_TWN	F	0:06:18.252-0:06:18.518	IT1	0.170075	8	0.637146
Trial 1	1.1	S_TWN	F	0:06:18.518-0:06:18.784	IT1	0.146469	8	0.548712
Trial 1	1.1	S_TWN	F	0:06:18.784-0:06:19.050	IT1	0.377499	8	1.41421
Trial 1	1.1	S_TWN	F	0:06:19.050-0:06:19.316	IT1	0.14071	8	0.527137
Trial 1	1.1	S_TWN	F	0:06:19.316-0:06:19.582	IT1	0.32116	8	1.20314
Trial 1	1.1	S_TWN	F	0:06:19.582-0:06:19.848	IT1	0.107442	8	0.402504
Trial 1	1.1	S_TWN	F	0:06:19.848-0:06:20.114	IT1	0.239853	8	0.898548
Trial 1	1.1	S_TWN	F	0:06:20.114-0:06:20.380	IT1	0.20306	7	0.869392
Trial 1	1.1	S_TWN	F	0:06:20.380-0:06:20.646	IT1	0.146689	8	0.549533
Trial 1	1.1	S_TWN	F	0:06:20.646-0:06:20.912	IT1	0.1722	8	0.645106
Trial 1	1.1	S_TWN	F	0:06:20.912-0:06:21.178	IT1	0.218812	8	0.819722
Trial 1	1.1	S_TWN	F	0:06:21.178-0:06:21.444	IT1	0.187286	8	0.701624
Trial 1	1.1	S_TWN	F	0:06:21.444-0:06:21.710	IT1	0.244165	8	0.914705
Trial 1	1.1	S_TWN	F	0:06:21.710-0:06:21.976	IT1	0.123606	8	0.463061
Trial 1	1.1	S_TWN	F	0:06:21.976-0:06:22.242	IT1	0.227287	8	0.851469
Trial 1	1.1	S_TWN	F	0:06:22.242-0:06:22.508	IT1	0.15378	8	0.576098
Trial 1	1.1	S_TWN	F	0:06:22.508-0:06:22.774	IT1	0.0655344	8	0.245509
Trial 1	1.1	S_TWN	F	0:06:22.774-0:06:23.040	IT1	0.0925346	8	0.346658
Trial 1	1.1	S_TWN	F	0:06:23.040-0:06:23.306	IT1	0.0846491	8	0.317118
Trial 1	1.1	S_TWN	F	0:06:23.306-0:06:23.572	IT1	0.143568	8	0.537836
Trial 1	1.1	S_TWN	F	0:06:23.572-0:06:23.838	IT1	0.160111	8	0.599814
Trial 1	1.1	S_TWN	F	0:06:23.838-0:06:24.104	IT1	0.174383	8	0.65328
Trial 1	1.1	S_TWN	F	0:06:24.104-0:06:24.370	IT1	0.118976	8	0.445713
Trial 1	1.1	S_TWN	F	0:06:24.370-0:06:24.636	IT1	0.168684	8	0.631932
Trial 1	1.1	S_TWN	F	0:06:24.636-0:06:24.902	IT1	0.126509	8	0.473933
Trial 1	1.1	S_TWN	F	0:06:24.902-0:06:25.168	IT1	0.0646617	8	0.242238
Trial 1	1.1	S_TWN	F	0:06:25.168-0:06:25.434	IT1	0.0406669	8	0.152349
Trial 1	1.1	S_TWN	F	0:06:25.434-0:06:25.700	IT1	0.119036	8	0.445935
Trial 1	1.1	S_TWN	F	0:06:25.700-0:06:25.966	IT1	0.237817	8	0.890921
Trial 1	1.1	S_TWN	F	0:06:25.966-0:06:26.232	IT1	0.306987	8	1.15005
Trial 1	1.1	S_TWN	F	0:06:26.232-0:06:26.498	IT1	0.305618	8	1.14492
Trial 1	1.1	S_TWN	F	0:06:26.498-0:06:26.764	IT1	0.183235	8	0.686448
Trial 1	1.1	S_TWN	F	0:06:26.764-0:06:27.030	IT1	0.544774	8	2.04085
Trial 1	1.1	S_TWN	F	0:06:27.030-0:06:27.296	IT1	0.968912	8	3.62979
Trial 1	1.1	S_TWN	F	0:06:27.296-0:06:27.562	IT1	0.456312	8	1.70945
Trial 1	1.1	S_TWN	F	0:06:27.562-0:06:27.828	IT1	0.30474	8	1.14163
Trial 1	1.1	S_TWN	F	0:06:27.828-0:06:28.094	IT1	0.554081	8	2.07573
Trial 1	1.1	S_TWN	F	0:06:28.094-0:06:28.360	IT1	0.548828	8	2.05604
Trial 1	1.1	S_TWN	F	0:06:28.360-0:06:28.626	IT1	0.178102	8	0.667214
Trial 1	1.1	S_TWN	F	0:06:28.626-0:06:28.892	IT1	0.111393	8	0.417304
Trial 1	1.1	S_TWN	F	0:06:28.892-0:06:29.158	IT1	0.285823	8	1.07076
Trial 1	1.1	S_TWN	F	0:06:29.158-0:06:29.424	IT1	0.149776	8	0.561102
Trial 1	1.1	S_TWN	F	0:06:29.424-0:06:29.690	IT1	0.123551	8	0.46285
Trial 1	1.1	S_TWN	F	0:06:29.690-0:06:29.956	IT1	0.118678	7	0.508108
Trial 1	1.1	S_TWN	F	0:06:29.956-0:06:30.222	IT1	0.188478	8	0.706087
Trial 1	1.1	S_TWN	F	0:06:30.222-0:06:30.488	IT1	0.301585	8	1.12981
Trial 1	1.1	S_TWN	F	0:06:30.488-0:06:30.754	IT1	0.19347	8	0.724785
Trial 1	1.1	S_TWN	F	0:06:30.754-0:06:31.020	IT1	0.260512	8	0.975944
Trial 1	1.1	S_TWN	F	0:06:31.020-0:06:31.286	IT1	0.464302	8	1.73939
Trial 1	1.1	S_TWN	F	0:06:31.286-0:06:31.552	IT1	0.214922	8	0.805148
Trial 1	1.1	S_TWN	F	0:06:31.552-0:06:31.818	IT1	0.217553	8	0.815006
Trial 1	1.1	S_TWN	F	0:06:31.818-0:06:32.084	IT1	0.15812	8	0.592356
Trial 1	1.1	S_TWN	F	0:06:32.084-0:06:32.350	IT1	0.191478	8	0.717329
Trial 1	1.1	S_TWN	F	0:06:32.350-0:06:32.616	IT1	0.27365	8	1.02516
Trial 1	1.1	S_TWN	F	0:06:32.616-0:06:32.882	IT1	0.174009	8	0.651885
Trial 1	1.1	S_TWN	F	0:06:32.882-0:06:33.148	IT1	0.19688	8	0.737562
Trial 1	1.1	S_TWN	F	0:06:33.148-0:06:33.414	IT1	0.1554	8	0.582164
Trial 1	1.1	S_TWN	F	0:06:33.414-0:06:33.680	IT1	0.45872	8	1.71848
Trial 1	1.1	S_TWN	F	0:06:33.680-0:06:33.946	IT1	0.130393	8	0.488485
Trial 1	1.1	S_TWN	F	0:06:33.946-0:06:34.212	IT1	0.14704	8	0.550847
Trial 1	1.1	S_TWN	F	0:06:34.212-0:06:34.478	IT1	0.0986622	8	0.369611
Trial 1	1.1	S_TWN	F	0:06:34.478-0:06:34.744	IT1	0.177758	8	0.665923
Trial 1	1.1	S_TWN	F	0:06:34.744-0:06:35.010	IT1	0.135388	8	0.507197
Trial 1	1.1	S_TWN	F	0:06:35.010-0:06:35.276	IT1	0.173863	8	0.651337
Trial 1	1.1	S_TWN	F	0:06:35.276-0:06:35.542	IT1	0.164636	8	0.616769
Trial 1	1.1	S_TWN	F	0:06:35.542-0:06:35.808	IT1	0.156476	8	0.586194
Trial 1	1.1	S_TWN	F	0:06:35.808-0:06:36.074	IT1	0.0852763	8	0.319465
Trial 1	1.1	S_TWN	F	0:06:36.074-0:06:36.340	IT1	0.0405889	8	0.152056
Trial 1	1.1	S_TWN	F	0:06:36.340-0:06:36.606	IT1	0.0748092	8	0.280253
Trial 1	1.1	S_TWN	F	0:06:36.606-0:06:36.872	IT1	0.0834669	8	0.312689
Trial 1	1.1	S_TWN	F	0:06:36.872-0:06:37.138	IT1	0.0989585	8	0.370722
Trial 1	1.1	S_TWN	F	0:06:37.138-0:06:37.404	IT1	0.136387	8	0.510939
Trial 1	1.1	S_TWN	F	0:06:37.404-0:06:37.670	IT1	0.156461	8	0.586145
Trial 1	1.1	S_TWN	F	0:06:37.670-0:06:37.936	IT1	0.07474	8	0.279993
Trial 1	1.1	S_TWN	F	0:06:37.936-0:06:38.202	IT1	0.102773	8	0.385012
Trial 1	1.1	S_TWN	F	0:06:38.202-0:06:38.468	IT1	0.363738	8	1.36266
Trial 1	1.1	S_TWN	F	0:06:38.468-0:06:38.734	IT1	0.247568	8	0.927451
Trial 1	1.1	S_TWN	F	0:06:38.734-0:06:39.000	IT1	0.24887	8	0.932335
Trial 1	1.1	S_TWN	F	0:06:39.000-0:06:39.266	IT1	0.822772	8	3.08231
Trial 1	1.1	S_TWN	F	0:06:39.266-0:06:39.532	IT1	1.54	7	6.59341
Trial 1	1.1	S_TWN	F	0:06:39.532-0:06:39.798	IT1	1.87054	8	7.00751
Trial 1	1.1	S_TWN	F	0:06:39.798-0:06:40.064	IT1	1.81178	8	6.78737
Trial 1	1.1	S_TWN	F	0:06:40.064-0:06:40.330	IT1	0.751044	8	2.81361
Trial 1	1.1	S_TWN	F	0:06:40.330-0:06:40.596	IT1	1.35992	8	5.09459
Trial 1	1.1	S_TWN	F	0:06:40.596-0:06:40.862	IT1	0.866084	8	3.24456
Trial 1	1.1	S_TWN	F	0:06:40.862-0:06:41.128	IT1	0.949728	8	3.55792
Trial 1	1.1	S_TWN	F	0:06:41.128-0:06:41.394	IT1	0.658396	8	2.46651
Trial 1	1.1	S_TWN	F	0:06:41.394-0:06:41.660	IT1	1.19147	8	4.46353
Trial 1	1.1	S_TWN	F	0:06:41.660-0:06:41.926	IT1	0.322284	8	1.20735
Trial 1	1.1	S_TWN	F	0:06:41.926-0:06:42.192	IT1	1.37444	8	5.14898
Trial 1	1.1	S_TWN	F	0:06:42.192-0:06:42.458	IT1	0.94667	8	3.54647
Trial 1	1.1	S_TWN	F	0:06:42.458-0:06:42.724	IT1	1.30532	8	4.89003
Trial 1	1.1	S_TWN	F	0:06:42.724-0:06:42.990	IT1	1.59167	8	5.96282
Trial 1	1.1	S_TWN	F	0:06:42.990-0:06:43.256	IT1	2.53901	8	9.51176
Trial 1	1.1	S_TWN	F	0:06:43.256-0:06:43.522	IT1	0.907664	8	3.40033
Trial 1	1.1	S_TWN	F	0:06:43.522-0:06:43.788	IT1	0.309226	8	1.15845
Trial 1	1.1	S_TWN	F	0:06:43.788-0:06:44.054	IT1	0.286199	8	1.07217
Trial 1	1.1	S_TWN	F	0:06:44.054-0:06:44.320	IT1	0.444921	8	1.66679
Trial 1	1.1	S_TWN	F	0:06:44.320-0:06:44.586	IT1	0.742372	8	2.7811
Trial 1	1.1	S_TWN	F	0:06:44.586-0:06:44.852	IT1	0.321119	8	1.20299
Trial 1	1.1	S_TWN	F	0:06:44.852-0:06:45.118	IT1	0.304537	8	1.14088
Trial 1	1.1	S_TWN	F	0:06:45.118-0:06:45.384	IT1	0.184997	8	0.693045
Trial 1	1.1	S_TWN	F	0:06:45.384-0:06:45.650	IT1	0.135461	8	0.507474
Trial 1	1.1	S_TWN	F	0:06:45.650-0:06:45.916	IT1	0.233895	8	0.876232
Trial 1	1.1	S_TWN	F	0:06:45.916-0:06:46.182	IT1	0.265297	8	0.993867
Trial 1	1.1	S_TWN	F	0:06:46.182-0:06:46.448	IT1	0.25875	8	0.969342
Trial 1	1.1	S_TWN	F	0:06:46.448-0:06:46.714	IT1	0.407287	8	1.52579
Trial 1	1.1	S_TWN	F	0:06:46.714-0:06:46.980	IT1	0.94245	8	3.53066
Trial 1	1.1	S_TWN	F	0:06:46.980-0:06:47.246	IT1	1.00244	8	3.75539
Trial 1	1.1	S_TWN	F	0:06:47.246-0:06:47.512	IT1	0.799393	8	2.99472
Trial 1	1.1	S_TWN	F	0:06:47.512-0:06:47.778	IT1	0.54533	8	2.04295
Trial 1	1.1	S_TWN	F	0:06:47.778-0:06:48.044	IT1	0.531692	8	1.99185
Trial 1	1.1	S_TWN	F	0:06:48.044-0:06:48.310	IT1	0.936766	8	3.50937
Trial 1	1.1	S_TWN	F	0:06:48.310-0:06:48.576	IT1	2.45164	8	9.18446
Trial 1	1.1	S_TWN	F	0:06:48.576-0:06:48.842	IT1	1.53666	7	6.57907
Trial 1	1.1	S_TWN	F	0:06:48.842-0:06:49.108	IT1	2.71528	8	10.1721
Trial 1	1.1	S_TWN	F	0:06:49.108-0:06:49.374	IT1	1.02209	8	3.82901
Trial 1	1.1	S_TWN	F	0:06:49.374-0:06:49.640	IT1	1.64317	8	6.15572
Trial 1	1.1	S_TWN	F	0:06:49.640-0:06:49.906	IT1	3.9813	8	14.915
Trial 1	1.1	S_TWN	F	0:06:49.906-0:06:50.172	IT1	1.42124	8	5.3243
Trial 1	1.1	S_TWN	F	0:06:50.172-0:06:50.438	CS2a	0.925476	8	3.46706
Trial 1	1.1	S_TWN	F	0:06:50.438-0:06:50.704	CS2a	0.3004	8	1.12538
Trial 1	1.1	S_TWN	F	0:06:50.704-0:06:50.970	CS2a	0.0798914	8	0.299295
Trial 1	1.1	S_TWN	F	0:06:50.970-0:06:51.236	CS2a	0.0442647	8	0.165826
Trial 1	1.1	S_TWN	F	0:06:51.236-0:06:51.502	CS2a	0.0851838	8	0.319119
Trial 1	1.1	S_TWN	F	0:06:51.502-0:06:51.768	CS2a	0.254666	8	0.954046
Trial 1	1.1	S_TWN	F	0:06:51.768-0:06:52.034	CS2a	0.439659	8	1.64708
Trial 1	1.1	S_TWN	F	0:06:52.034-0:06:52.300	CS2a	0.702115	8	2.63029
Trial 1	1.1	S_TWN	F	0:06:52.300-0:06:52.566	CS2a	0.552618	8	2.07025
Trial 1	1.1	S_TWN	F	0:06:52.566-0:06:52.832	CS2a	0.649571	8	2.43345
Trial 1	1.1	S_TWN	F	0:06:52.832-0:06:53.098	CS2a	0.804086	8	3.01231
Trial 1	1.1	S_TWN	F	0:06:53.098-0:06:53.364	CS2a	1.22598	8	4.59282
Trial 1	1.1	S_TWN	F	0:06:53.364-0:06:53.630	CS2a	0.935616	8	3.50504
Trial 1	1.1	S_TWN	F	0:06:53.630-0:06:53.896	CS2a	0.929959	8	3.48384
Trial 1	1.1	S_TWN	F	0:06:53.896-0:06:54.162	CS2a	1.26274	8	4.73051
Trial 1	1.1	S_TWN	F	0:06:54.162-0:06:54.428	CS2a	1.9758	8	7.40181
Trial 1	1.1	S_TWN	F	0:06:54.428-0:06:54.694	CS2a	1.18309	8	4.43215
Trial 1	1.1	S_TWN	F	0:06:54.694-0:06:54.960	CS2a	0.464167	8	1.73888
Trial 1	1.1	S_TWN	F	0:06:54.960-0:06:55.226	CS2a	0.381302	8	1.42845
Trial 1	1.1	S_TWN	F	0:06:55.226-0:06:55.492	CS2a	0.323145	8	1.21058
Trial 1	1.1	S_TWN	F	0:06:55.492-0:06:55.758	CS2a	0.296516	8	1.11083
Trial 1	1.1	S_TWN	F	0:06:55.758-0:06:56.024	CS2a	0.249406	8	0.934341
Trial 1	1.1	S_TWN	F	0:06:56.024-0:06:56.290	CS2a	0.688102	8	2.5778
Trial 1	1.1	S_TWN	F	0:06:56.290-0:06:56.556	CS2a	0.29619	8	1.1096
Trial 1	1.1	S_TWN	F	0:06:56.556-0:06:56.822	CS2a	0.89781	8	3.36342
Trial 1	1.1	S_TWN	F	0:06:56.822-0:06:57.088	CS2a	1.62485	8	6.08709
Trial 1	1.1	S_TWN	F	0:06:57.088-0:06:57.354	CS2a	1.49524	8	5.60157
Trial 1	1.1	S_TWN	F	0:06:57.354-0:06:57.620	CS2a	0.300325	8	1.1251
Trial 1	1.1	S_TWN	F	0:06:57.620-0:06:57.886	CS2a	0.20447	8	0.766
Trial 1	1.1	S_TWN	F	0:06:57.886-0:06:58.152	CS2a	0.322855	8	1.2095
Trial 1	1.1	S_TWN	F	0:06:58.152-0:06:58.418	CS2a	0.388231	7	1.66218
Trial 1	1.1	S_TWN	F	0:06:58.418-0:06:58.684	CS2a	0.3412	8	1.27822
Trial 1	1.1	S_TWN	F	0:06:58.684-0:06:58.950	CS2a	0.193126	8	0.723493
Trial 1	1.1	S_TWN	F	0:06:58.950-0:06:59.216	CS2a	0.211218	8	0.791281
Trial 1	1.1	S_TWN	F	0:06:59.216-0:06:59.482	CS2a	0.2556	8	0.957545
Trial 1	1.1	S_TWN	F	0:06:59.482-0:06:59.748	CS2a	0.160088	8	0.599729
Trial 1	1.1	S_TWN	F	0:06:59.748-0:07:00.014	CS2a	0.172717	8	0.647041
Trial 1	1.1	S_TWN	F	0:07:00.014-0:07:00.280	CS2b	0.244127	8	0.91456
Trial 1	1.1	S_TWN	F	0:07:00.280-0:07:00.546	CS2b	0.190911	8	0.7152
Trial 1	1.1	S_TWN	F	0:07:00.546-0:07:00.812	CS2b	0.113759	8	0.426173
Trial 1	1.1	S_TWN	F	0:07:00.812-0:07:01.078	CS2b	0.312476	8	1.17061
Trial 1	1.1	S_TWN	F	0:07:01.078-0:07:01.344	CS2b	0.164446	8	0.616055
Trial 1	1.1	S_TWN	F	0:07:01.344-0:07:01.610	CS2b	0.4274	8	1.60114
Trial 1	1.1	S_TWN	F	0:07:01.610-0:07:01.876	CS2b	0.27345	8	1.02441
Trial 1	1.1	S_TWN	F	0:07:01.876-0:07:02.142	CS2b	0.139338	8	0.521998
Trial 1	1.1	S_TWN	F	0:07:02.142-0:07:02.408	CS2b	0.144727	8	0.542183
Trial 1	1.1	S_TWN	F	0:07:02.408-0:07:02.674	CS2b	0.140245	8	0.525394
Trial 1	1.1	S_TWN	F	0:07:02.674-0:07:02.940	CS2b	0.0833873	8	0.312388
Trial 1	1.1	S_TWN	F	0:07:02.940-0:07:03.206	CS2b	0.0795233	8	0.297914
Trial 1	1.1	S_TWN	F	0:07:03.206-0:07:03.472	CS2b	0.0617016	8	0.231151
Trial 1	1.1	S_TWN	F	0:07:03.472-0:07:03.738	CS2b	0.102362	8	0.383472
Trial 1	1.1	S_TWN	F	0:07:03.738-0:07:04.004	CS2b	0.18295	8	0.68538
Trial 1	1.1	S_TWN	F	0:07:04.004-0:07:04.270	CS2b	0.172795	8	0.647335
Trial 1	1.1	S_TWN	F	0:07:04.270-0:07:04.536	CS2b	0.185164	8	0.693667
Trial 1	1.1	S_TWN	F	0:07:04.536-0:07:04.802	CS2b	0.187506	8	0.702441
Trial 1	1.1	S_TWN	F	0:07:04.802-0:07:05.068	CS2b	0.0911074	8	0.341311
Trial 1	1.1	S_TWN	F	0:07:05.068-0:07:05.334	CS2b	0.12856	8	0.481617
Trial 1	1.1	S_TWN	F	0:07:05.334-0:07:05.600	CS2b	0.158857	8	0.595115
Trial 1	1.1	S_TWN	F	0:07:05.600-0:07:05.866	CS2b	0.215205	8	0.806209
Trial 1	1.1	S_TWN	F	0:07:05.866-0:07:06.132	CS2b	0.180127	8	0.674803
Trial 1	1.1	S_TWN	F	0:07:06.132-0:07:06.398	CS2b	0.0591327	8	0.221525
Trial 1	1.1	S_TWN	F	0:07:06.398-0:07:06.664	CS2b	0.075303	8	0.282106
Trial 1	1.1	S_TWN	F	0:07:06.664-0:07:06.930	CS2b	0.121932	8	0.456784
Trial 1	1.1	S_TWN	F	0:07:06.930-0:07:07.196	CS2b	0.0916213	8	0.343235
Trial 1	1.1	S_TWN	F	0:07:07.196-0:07:07.462	CS2b	0.0806624	8	0.302183
Trial 1	1.1	S_TWN	F	0:07:07.462-0:07:07.728	CS2b	0.106282	8	0.398156
Trial 1	1.1	S_TWN	F	0:07:07.728-0:07:07.994	CS2b	0.113121	7	0.484317
Trial 1	1.1	S_TWN	F	0:07:07.994-0:07:08.260	CS2b	0.167908	8	0.62903
Trial 1	1.1	S_TWN	F	0:07:08.260-0:07:08.526	CS2b	0.205196	8	0.768716
Trial 1	1.1	S_TWN	F	0:07:08.526-0:07:08.792	CS2b	0.350341	8	1.31247
Trial 1	1.1	S_TWN	F	0:07:08.792-0:07:09.058	CS2b	0.350497	8	1.31305
Trial 1	1.1	S_TWN	F	0:07:09.058-0:07:09.324	CS2b	0.220343	8	0.825457
Trial 1	1.1	S_TWN	F	0:07:09.324-0:07:09.590	CS2b	0.151438	8	0.567327
Trial 1	1.1	S_TWN	F	0:07:09.590-0:07:09.856	CS2b	0.114183	8	0.42776
Trial 1	1.1	S_TWN	F	0:07:09.856-0:07:10.122	CS2b	0.303418	8	1.13668
Trial 1	1.1	S_TWN	F	0:07:10.122-0:07:10.388	IT2	8.53771	8	31.9844
Trial 1	1.1	S_TWN	F	0:07:10.388-0:07:10.654	IT2	14.6904	8	55.0341
Trial 1	1.1	S_TWN	F	0:07:10.654-0:07:10.920	IT2	11.3483	8	42.5137
Trial 1	1.1	S_TWN	F	0:07:10.920-0:07:11.186	IT2	13.9295	8	52.1834
Trial 1	1.1	S_TWN	F	0:07:11.186-0:07:11.452	IT2	7.45491	8	27.9279
Trial 1	1.1	S_TWN	F	0:07:11.452-0:07:11.718	IT2	2.00116	8	7.49683
Trial 1	1.1	S_TWN	F	0:07:11.718-0:07:11.984	IT2	1.97923	8	7.41471
Trial 1	1.1	S_TWN	F	0:07:11.984-0:07:12.250	IT2	0.0949362	8	0.355655
Trial 1	1.1	S_TWN	F	0:07:12.250-0:07:12.516	IT2	0.127111	8	0.476188
Trial 1	1.1	S_TWN	F	0:07:12.516-0:07:12.782	IT2	0.145269	8	0.544215
Trial 1	1.1	S_TWN	F	0:07:12.782-0:07:13.048	IT2	0.145269	8	0.544217
Trial 1	1.1	S_TWN	F	0:07:13.048-0:07:13.314	IT2	0.145269	8	0.544215
Trial 1	1.1	S_TWN	F	0:07:13.314-0:07:13.580	IT2	0.145269	8	0.544217
Trial 1	1.1	S_TWN	F	0:07:13.580-0:07:13.846	IT2	0.145269	8	0.544215
Trial 1	1.1	S_TWN	F	0:07:13.846-0:07:14.112	IT2	0.145269	8	0.544215
Trial 1	1.1	S_TWN	F	0:07:14.112-0:07:14.378	IT2	0.145269	8	0.544217
Trial 1	1.1	S_TWN	F	0:07:14.378-0:07:14.644	IT2	0.145269	8	0.544215
Trial 1	1.1	S_TWN	F	0:07:14.644-0:07:14.910	IT2	0.145269	8	0.544217
Trial 1	1.1	S_TWN	F	0:07:14.910-0:07:15.176	IT2	0.145269	8	0.544215
Trial 1	1.1	S_TWN	F	0:07:15.176-0:07:15.442	IT2	1.08519	8	4.06538
Trial 1	1.1	S_TWN	F	0:07:15.442-0:07:15.708	IT2	0.606441	8	2.27188
Trial 1	1.1	S_TWN	F	0:07:15.708-0:07:15.974	IT2	0.078843	8	0.295366
Trial 1	1.1	S_TWN	F	0:07:15.974-0:07:16.240	IT2	0.566238	8	2.12128
Trial 1	1.1	S_TWN	F	0:07:16.240-0:07:16.506	IT2	1.17702	8	4.40938
Trial 1	1.1	S_TWN	F	0:07:16.506-0:07:16.772	IT2	0.682822	8	2.55802
Trial 1	1.1	S_TWN	F	0:07:16.772-0:07:17.038	IT2	1.05326	8	3.94579
Trial 1	1.1	S_TWN	F	0:07:17.038-0:07:17.304	IT2	0.664311	8	2.48869
Trial 1	1.1	S_TWN	F	0:07:17.304-0:07:17.570	IT2	0.594393	7	2.54485
Trial 1	1.1	S_TWN	F	0:07:17.570-0:07:17.836	IT2	0.409673	8	1.53473
Trial 1	1.1	S_TWN	F	0:07:17.836-0:07:18.102	IT2	1.00325	8	3.75844
Trial 1	1.1	S_TWN	F	0:07:18.102-0:07:18.368	IT2	1.01478	8	3.80162
Trial 1	1.1	S_TWN	F	0:07:18.368-0:07:18.634	IT2	0.424844	8	1.59157
Trial 1	1.1	S_TWN	F	0:07:18.634-0:07:18.900	IT2	0.235261	8	0.881345
Trial 1	1.1	S_TWN	F	0:07:18.900-0:07:19.166	IT2	0.261313	8	0.978942
Trial 1	1.1	S_TWN	F	0:07:19.166-0:07:19.432	IT2	0.16768	8	0.62817
Trial 1	1.1	S_TWN	F	0:07:19.432-0:07:19.698	IT2	0.819215	8	3.06899
Trial 1	1.1	S_TWN	F	0:07:19.698-0:07:19.964	IT2	1.5298	8	5.731
Trial 1	1.1	S_TWN	F	0:07:19.964-0:07:20.230	IT2	0.551344	8	2.06547
Trial 1	1.1	S_TWN	F	0:07:20.230-0:07:20.496	IT2	0.391211	8	1.46558
Trial 1	1.1	S_TWN	F	0:07:20.496-0:07:20.762	IT2	0.249296	8	0.933925
Trial 1	1.1	S_TWN	F	0:07:20.762-0:07:21.028	IT2	0.224885	8	0.84248
Trial 1	1.1	S_TWN	F	0:07:21.028-0:07:21.294	IT2	0.0871577	8	0.326514
Trial 1	1.1	S_TWN	F	0:07:21.294-0:07:21.560	IT2	0.811636	8	3.04058
Trial 1	1.1	S_TWN	F	0:07:21.560-0:07:21.826	IT2	0.659608	8	2.47105
Trial 1	1.1	S_TWN	F	0:07:21.826-0:07:22.092	IT2	0.620058	8	2.32287
Trial 1	1.1	S_TWN	F	0:07:22.092-0:07:22.358	IT2	0.312713	8	1.1715
Trial 1	1.1	S_TWN	F	0:07:22.358-0:07:22.624	IT2	0.511953	8	1.9179
Trial 1	1.1	S_TWN	F	0:07:22.624-0:07:22.890	IT2	0.334596	8	1.25348
Trial 1	1.1	S_TWN	F	0:07:22.890-0:07:23.156	IT2	0.330701	8	1.23888
Trial 1	1.1	S_TWN	F	0:07:23.156-0:07:23.422	IT2	0.316977	8	1.18748
Trial 1	1.1	S_TWN	F	0:07:23.422-0:07:23.688	IT2	0.233325	8	0.874102
Trial 1	1.1	S_TWN	F	0:07:23.688-0:07:23.954	IT2	0.192411	8	0.720814
Trial 1	1.1	S_TWN	F	0:07:23.954-0:07:24.220	IT2	0.659547	8	2.47082
Trial 1	1.1	S_TWN	F	0:07:24.220-0:07:24.486	IT2	0.897536	8	3.3624
Trial 1	1.1	S_TWN	F	0:07:24.486-0:07:24.752	IT2	0.320597	8	1.20103
Trial 1	1.1	S_TWN	F	0:07:24.752-0:07:25.018	IT2	0.637114	8	2.3868
Trial 1	1.1	S_TWN	F	0:07:25.018-0:07:25.284	IT2	0.875749	8	3.28077
Trial 1	1.1	S_TWN	F	0:07:25.284-0:07:25.550	IT2	0.621961	8	2.33002
Trial 1	1.1	S_TWN	F	0:07:25.550-0:07:25.816	IT2	0.189793	8	0.711015
Trial 1	1.1	S_TWN	F	0:07:25.816-0:07:26.082	IT2	0.265677	8	0.99529
Trial 1	1.1	S_TWN	F	0:07:26.082-0:07:26.348	IT2	0.433573	8	1.62428
Trial 1	1.1	S_TWN	F	0:07:26.348-0:07:26.614	IT2	0.37839	8	1.41754
Trial 1	1.1	S_TWN	F	0:07:26.614-0:07:26.880	IT2	0.19658	7	0.841641
Trial 1	1.1	S_TWN	F	0:07:26.880-0:07:27.146	IT2	0.153868	8	0.576426
Trial 1	1.1	S_TWN	F	0:07:27.146-0:07:27.412	IT2	0.18785	8	0.703734
Trial 1	1.1	S_TWN	F	0:07:27.412-0:07:27.678	IT2	0.132823	8	0.497584
Trial 1	1.1	S_TWN	F	0:07:27.678-0:07:27.944	IT2	0.501028	8	1.87698
Trial 1	1.1	S_TWN	F	0:07:27.944-0:07:28.210	IT2	0.531187	8	1.98996
Trial 1	1.1	S_TWN	F	0:07:28.210-0:07:28.476	IT2	0.479086	8	1.79477
Trial 1	1.1	S_TWN	F	0:07:28.476-0:07:28.742	IT2	0.456081	8	1.7086
Trial 1	1.1	S_TWN	F	0:07:28.742-0:07:29.008	IT2	0.360639	8	1.35104
Trial 1	1.1	S_TWN	F	0:07:29.008-0:07:29.274	IT2	0.148437	8	0.556086
Trial 1	1.1	S_TWN	F	0:07:29.274-0:07:29.540	IT2	0.259502	8	0.972156
Trial 1	1.1	S_TWN	F	0:07:29.540-0:07:29.806	IT2	0.283338	8	1.06145
Trial 1	1.1	S_TWN	F	0:07:29.806-0:07:30.072	IT2	0.193799	8	0.72602
Trial 1	1.1	S_TWN	F	0:07:30.072-0:07:30.338	IT2	0.24481	8	0.917117
Trial 1	1.1	S_TWN	F	0:07:30.338-0:07:30.604	IT2	0.170008	8	0.636891
Trial 1	1.1	S_TWN	F	0:07:30.604-0:07:30.870	IT2	0.327467	8	1.22677
Trial 1	1.1	S_TWN	F	0:07:30.870-0:07:31.136	IT2	0.130341	8	0.488287
Trial 1	1.1	S_TWN	F	0:07:31.136-0:07:31.402	IT2	0.0780242	8	0.292298
Trial 1	1.1	S_TWN	F	0:07:31.402-0:07:31.668	IT2	0.209862	8	0.786189
Trial 1	1.1	S_TWN	F	0:07:31.668-0:07:31.934	IT2	0.141642	8	0.530628
Trial 1	1.1	S_TWN	F	0:07:31.934-0:07:32.200	IT2	0.274429	8	1.02808
Trial 1	1.1	S_TWN	F	0:07:32.200-0:07:32.466	IT2	0.393647	8	1.47469
Trial 1	1.1	S_TWN	F	0:07:32.466-0:07:32.732	IT2	0.424831	8	1.59153
Trial 1	1.1	S_TWN	F	0:07:32.732-0:07:32.998	IT2	0.303437	8	1.13675
Trial 1	1.1	S_TWN	F	0:07:32.998-0:07:33.264	IT2	0.428007	8	1.60342
Trial 1	1.1	S_TWN	F	0:07:33.264-0:07:33.530	IT2	0.394091	8	1.47636
Trial 1	1.1	S_TWN	F	0:07:33.530-0:07:33.796	IT2	0.225499	8	0.844773
Trial 1	1.1	S_TWN	F	0:07:33.796-0:07:34.062	IT2	0.279232	8	1.04608
Trial 1	1.1	S_TWN	F	0:07:34.062-0:07:34.328	IT2	0.411264	8	1.54069
Trial 1	1.1	S_TWN	F	0:07:34.328-0:07:34.594	IT2	0.229319	8	0.859087
Trial 1	1.1	S_TWN	F	0:07:34.594-0:07:34.860	IT2	0.822412	8	3.08095
Trial 1	1.1	S_TWN	F	0:07:34.860-0:07:35.126	IT2	0.823318	8	3.08435
Trial 1	1.1	S_TWN	F	0:07:35.126-0:07:35.392	IT2	0.448542	8	1.68035
Trial 1	1.1	S_TWN	F	0:07:35.392-0:07:35.658	IT2	0.656363	8	2.4589
Trial 1	1.1	S_TWN	F	0:07:35.658-0:07:35.924	IT2	0.23538	8	0.88179
Trial 1	1.1	S_TWN	F	0:07:35.924-0:07:36.190	IT2	0.0419263	8	0.157066
Trial 1	1.1	S_TWN	F	0:07:36.190-0:07:36.456	IT2	0.0819218	7	0.350741
Trial 1	1.1	S_TWN	F	0:07:36.456-0:07:36.722	IT2	0.178741	8	0.669612
Trial 1	1.1	S_TWN	F	0:07:36.722-0:07:36.988	IT2	0.170627	8	0.639208
Trial 1	1.1	S_TWN	F	0:07:36.988-0:07:37.254	IT2	0.638915	8	2.39353
Trial 1	1.1	S_TWN	F	0:07:37.254-0:07:37.520	IT2	0.854202	8	3.20007
Trial 1	1.1	S_TWN	F	0:07:37.520-0:07:37.786	IT2	0.93415	8	3.49956
Trial 1	1.1	S_TWN	F	0:07:37.786-0:07:38.052	IT2	0.479843	8	1.79762
Trial 1	1.1	S_TWN	F	0:07:38.052-0:07:38.318	IT2	0.352555	8	1.32076
Trial 1	1.1	S_TWN	F	0:07:38.318-0:07:38.584	IT2	0.345046	8	1.29263
Trial 1	1.1	S_TWN	F	0:07:38.584-0:07:38.850	IT2	0.195469	8	0.732276
Trial 1	1.1	S_TWN	F	0:07:38.850-0:07:39.116	IT2	0.0947327	8	0.354891
Trial 1	1.1	S_TWN	F	0:07:39.116-0:07:39.382	IT2	0.071957	8	0.26957
Trial 1	1.1	S_TWN	F	0:07:39.382-0:07:39.648	IT2	0.160443	8	0.601057
Trial 1	1.1	S_TWN	F	0:07:39.648-0:07:39.914	IT2	0.332262	8	1.24474
Trial 1	1.1	S_TWN	F	0:07:39.914-0:07:40.180	IT2	0.262554	8	0.983597
Trial 1	1.1	S_TWN	F	0:07:40.180-0:07:40.446	IT2	0.315699	8	1.18269
Trial 1	1.1	S_TWN	F	0:07:40.446-0:07:40.712	IT2	0.516555	8	1.93515
Trial 1	1.1	S_TWN	F	0:07:40.712-0:07:40.978	IT2	0.271467	8	1.01698
Trial 1	1.1	S_TWN	F	0:07:40.978-0:07:41.244	IT2	0.132421	8	0.49608
Trial 1	1.1	S_TWN	F	0:07:41.244-0:07:41.510	IT2	0.139512	8	0.522648
Trial 1	1.1	S_TWN	F	0:07:41.510-0:07:41.776	IT2	0.632485	8	2.36945
Trial 1	1.1	S_TWN	F	0:07:41.776-0:07:42.042	IT2	1.07112	8	4.01269
Trial 1	1.1	S_TWN	F	0:07:42.042-0:07:42.308	IT2	0.701255	8	2.62707
Trial 1	1.1	S_TWN	F	0:07:42.308-0:07:42.574	IT2	0.490379	8	1.83708
Trial 1	1.1	S_TWN	F	0:07:42.574-0:07:42.840	IT2	0.0918126	8	0.343952
Trial 1	1.1	S_TWN	F	0:07:42.840-0:07:43.106	IT2	0.121732	8	0.456034
Trial 1	1.1	S_TWN	F	0:07:43.106-0:07:43.372	IT2	0.285412	8	1.06923
Trial 1	1.1	S_TWN	F	0:07:43.372-0:07:43.638	IT2	0.64994	8	2.43483
Trial 1	1.1	S_TWN	F	0:07:43.638-0:07:43.904	IT2	0.364763	8	1.36649
Trial 1	1.1	S_TWN	F	0:07:43.904-0:07:44.170	IT2	0.315962	8	1.18368
Trial 1	1.1	S_TWN	F	0:07:44.170-0:07:44.436	IT2	0.649405	8	2.43283
Trial 1	1.1	S_TWN	F	0:07:44.436-0:07:44.702	IT2	0.778139	8	2.91511
Trial 1	1.1	S_TWN	F	0:07:44.702-0:07:44.968	IT2	0.429291	8	1.60823
Trial 1	1.1	S_TWN	F	0:07:44.968-0:07:45.234	IT2	0.519046	8	1.94448
Trial 1	1.1	S_TWN	F	0:07:45.234-0:07:45.500	IT2	0.336008	8	1.25877
Trial 1	1.1	S_TWN	F	0:07:45.500-0:07:45.766	IT2	0.384175	8	1.43922
Trial 1	1.1	S_TWN	F	0:07:45.766-0:07:46.032	IT2	0.626932	7	2.68418
Trial 1	1.1	S_TWN	F	0:07:46.032-0:07:46.298	IT2	0.168738	8	0.632143
Trial 1	1.1	S_TWN	F	0:07:46.298-0:07:46.564	IT2	0.52805	8	1.9782
Trial 1	1.1	S_TWN	F	0:07:46.564-0:07:46.830	IT2	1.19387	8	4.47253
Trial 1	1.1	S_TWN	F	0:07:46.830-0:07:47.096	IT2	1.42471	8	5.33732
Trial 1	1.1	S_TWN	F	0:07:47.096-0:07:47.362	IT2	0.34036	8	1.27507
Trial 1	1.1	S_TWN	F	0:07:47.362-0:07:47.628	IT2	0.235773	8	0.883259
Trial 1	1.1	S_TWN	F	0:07:47.628-0:07:47.894	IT2	0.286701	8	1.07405
Trial 1	1.1	S_TWN	F	0:07:47.894-0:07:48.160	IT2	0.18884	8	0.707441
Trial 1	1.1	S_TWN	F	0:07:48.160-0:07:48.426	IT2	0.112412	8	0.421126
Trial 1	1.1	S_TWN	F	0:07:48.426-0:07:48.692	IT2	0.12658	8	0.474197
Trial 1	1.1	S_TWN	F	0:07:48.692-0:07:48.958	IT2	0.045393	8	0.170055
Trial 1	1.1	S_TWN	F	0:07:48.958-0:07:49.224	IT2	0.05179	8	0.194018
Trial 1	1.1	S_TWN	F	0:07:49.224-0:07:49.490	IT2	0.141901	8	0.531593
Trial 1	1.1	S_TWN	F	0:07:49.490-0:07:49.756	IT2	0.245345	8	0.919126
Trial 1	1.1	S_TWN	F	0:07:49.756-0:07:50.022	IT2	0.363959	8	1.36348
Trial 1	1.1	S_TWN	F	0:07:50.022-0:07:50.288	IT2	0.255736	8	0.958055
Trial 1	1.1	S_TWN	F	0:07:50.288-0:07:50.554	IT2	0.186182	8	0.697485
Trial 1	1.1	S_TWN	F	0:07:50.554-0:07:50.820	IT2	0.248825	8	0.932164
Trial 1	1.1	S_TWN	F	0:07:50.820-0:07:51.086	IT2	0.0928385	8	0.347797
Trial 1	1.1	S_TWN	F	0:07:51.086-0:07:51.352	IT2	0.150311	8	0.563102
Trial 1	1.1	S_TWN	F	0:07:51.352-0:07:51.618	IT2	0.181675	8	0.680605
Trial 1	1.1	S_TWN	F	0:07:51.618-0:07:51.884	IT2	0.428751	8	1.60621
Trial 1	1.1	S_TWN	F	0:07:51.884-0:07:52.150	IT2	0.80401	8	3.01202
Trial 1	1.1	S_TWN	F	0:07:52.150-0:07:52.416	IT2	0.327312	8	1.22619
Trial 1	1.1	S_TWN	F	0:07:52.416-0:07:52.682	IT2	0.591081	8	2.21434
Trial 1	1.1	S_TWN	F	0:07:52.682-0:07:52.948	IT2	0.24842	8	0.930649
Trial 1	1.1	S_TWN	F	0:07:52.948-0:07:53.214	IT2	0.247252	8	0.926269
Trial 1	1.1	S_TWN	F	0:07:53.214-0:07:53.480	IT2	0.674491	8	2.5268
Trial 1	1.1	S_TWN	F	0:07:53.480-0:07:53.746	IT2	1.2613	8	4.72515
Trial 1	1.1	S_TWN	F	0:07:53.746-0:07:54.012	IT2	0.445353	8	1.6684
Trial 1	1.1	S_TWN	F	0:07:54.012-0:07:54.278	IT2	0.880441	8	3.29836
Trial 1	1.1	S_TWN	F	0:07:54.278-0:07:54.544	IT2	0.408917	8	1.5319
Trial 1	1.1	S_TWN	F	0:07:54.544-0:07:54.810	IT2	0.390092	8	1.46138
Trial 1	1.1	S_TWN	F	0:07:54.810-0:07:55.076	IT2	0.168167	8	0.629997
Trial 1	1.1	S_TWN	F	0:07:55.076-0:07:55.342	IT2	0.135572	7	0.580444
Trial 1	1.1	S_TWN	F	0:07:55.342-0:07:55.608	IT2	0.0557067	8	0.208691
Trial 1	1.1	S_TWN	F	0:07:55.608-0:07:55.874	IT2	0.064195	8	0.240492
Trial 1	1.1	S_TWN	F	0:07:55.874-0:07:56.140	IT2	0.315447	8	1.18174
Trial 1	1.1	S_TWN	F	0:07:56.140-0:07:56.406	IT2	0.520087	8	1.94838
Trial 1	1.1	S_TWN	F	0:07:56.406-0:07:56.672	IT2	0.296812	8	1.11192
Trial 1	1.1	S_TWN	F	0:07:56.672-0:07:56.938	IT2	0.298036	8	1.11652
Trial 1	1.1	S_TWN	F	0:07:56.938-0:07:57.204	IT2	0.1971	8	0.738388
Trial 1	1.1	S_TWN	F	0:07:57.204-0:07:57.470	IT2	0.167954	8	0.629194
Trial 1	1.1	S_TWN	F	0:07:57.470-0:07:57.736	IT2	0.094627	8	0.354497
Trial 1	1.1	S_TWN	F	0:07:57.736-0:07:58.002	IT2	0.314626	8	1.17868
Trial 1	1.1	S_TWN	F	0:07:58.002-0:07:58.268	IT2	0.304884	8	1.14217
Trial 1	1.1	S_TWN	F	0:07:58.268-0:07:58.534	IT2	0.234821	8	0.8797
Trial 1	1.1	S_TWN	F	0:07:58.534-0:07:58.800	IT2	0.250569	8	0.938688
Trial 1	1.1	S_TWN	F	0:07:58.800-0:07:59.066	IT2	0.364305	8	1.36478
Trial 1	1.1	S_TWN	F	0:07:59.066-0:07:59.332	IT2	0.153103	8	0.573564
Trial 1	1.1	S_TWN	F	0:07:59.332-0:07:59.598	IT2	0.17516	8	0.656191
Trial 1	1.1	S_TWN	F	0:07:59.598-0:07:59.864	IT2	0.129653	8	0.485714
Trial 1	1.1	S_TWN	F	0:07:59.864-0:08:00.130	IT2	0.313863	8	1.17581
Trial 1	1.1	S_TWN	F	0:08:00.130-0:08:00.396	IT2	0.240955	8	0.902682
Trial 1	1.1	S_TWN	F	0:08:00.396-0:08:00.662	IT2	0.193612	8	0.725316
Trial 1	1.1	S_TWN	F	0:08:00.662-0:08:00.928	IT2	0.204689	8	0.766814
Trial 1	1.1	S_TWN	F	0:08:00.928-0:08:01.194	IT2	0.321376	8	1.20396
Trial 1	1.1	S_TWN	F	0:08:01.194-0:08:01.460	IT2	0.341024	8	1.27756
Trial 1	1.1	S_TWN	F	0:08:01.460-0:08:01.726	IT2	0.168395	8	0.630852
Trial 1	1.1	S_TWN	F	0:08:01.726-0:08:01.992	IT2	0.0947614	8	0.354999
Trial 1	1.1	S_TWN	F	0:08:01.992-0:08:02.258	IT2	0.114514	8	0.428994
Trial 1	1.1	S_TWN	F	0:08:02.258-0:08:02.524	IT2	0.436266	8	1.63437
Trial 1	1.1	S_TWN	F	0:08:02.524-0:08:02.790	IT2	0.440113	8	1.64878
Trial 1	1.1	S_TWN	F	0:08:02.790-0:08:03.056	IT2	0.132778	8	0.497421
Trial 1	1.1	S_TWN	F	0:08:03.056-0:08:03.322	IT2	0.0855781	8	0.320596
Trial 1	1.1	S_TWN	F	0:08:03.322-0:08:03.588	IT2	0.195987	8	0.734219
Trial 1	1.1	S_TWN	F	0:08:03.588-0:08:03.854	IT2	0.144569	8	0.54159
Trial 1	1.1	S_TWN	F	0:08:03.854-0:08:04.120	IT2	0.117993	8	0.44203
Trial 1	1.1	S_TWN	F	0:08:04.120-0:08:04.386	IT2	0.0807009	8	0.302327
Trial 1	1.1	S_TWN	F	0:08:04.386-0:08:04.652	IT2	0.0273592	8	0.102494
Trial 1	1.1	S_TWN	F	0:08:04.652-0:08:04.918	IT2	0.278927	7	1.1942
Trial 1	1.1	S_TWN	F	0:08:04.918-0:08:05.184	IT2	0.472506	8	1.77012
Trial 1	1.1	S_TWN	F	0:08:05.184-0:08:05.450	IT2	0.920116	8	3.44699
Trial 1	1.1	S_TWN	F	0:08:05.450-0:08:05.716	IT2	0.462221	8	1.73159
Trial 1	1.1	S_TWN	F	0:08:05.716-0:08:05.982	IT2	0.262397	8	0.983011
Trial 1	1.1	S_TWN	F	0:08:05.982-0:08:06.248	IT2	0.690642	8	2.58731
Trial 1	1.1	S_TWN	F	0:08:06.248-0:08:06.514	IT2	0.385378	8	1.44372
Trial 1	1.1	S_TWN	F	0:08:06.514-0:08:06.780	IT2	0.197165	8	0.738634
Trial 1	1.1	S_TWN	F	0:08:06.780-0:08:07.046	IT2	0.229605	8	0.860161
Trial 1	1.1	S_TWN	F	0:08:07.046-0:08:07.312	IT2	0.382846	8	1.43424
Trial 1	1.1	S_TWN	F	0:08:07.312-0:08:07.578	IT2	0.327506	8	1.22691
Trial 1	1.1	S_TWN	F	0:08:07.578-0:08:07.844	IT2	0.142083	8	0.532275
Trial 1	1.1	S_TWN	F	0:08:07.844-0:08:08.110	IT2	0.167981	8	0.6293
Trial 1	1.1	S_TWN	F	0:08:08.110-0:08:08.376	IT2	0.266857	8	0.999712
Trial 1	1.1	S_TWN	F	0:08:08.376-0:08:08.642	IT2	0.258118	8	0.966971
Trial 1	1.1	S_TWN	F	0:08:08.642-0:08:08.908	IT2	0.361595	8	1.35462
Trial 1	1.1	S_TWN	F	0:08:08.908-0:08:09.174	IT2	0.270891	8	1.01483
Trial 1	1.1	S_TWN	F	0:08:09.174-0:08:09.440	IT2	0.144408	8	0.54099
Trial 1	1.1	S_TWN	F	0:08:09.440-0:08:09.706	IT2	0.276876	8	1.03724
Trial 1	1.1	S_TWN	F	0:08:09.706-0:08:09.972	IT2	0.0958195	8	0.358964
Trial 1	1.1	S_TWN	F	0:08:09.972-0:08:10.238	IT2	0.0594794	8	0.222824
Trial 1	1.1	S_TWN	F	0:08:10.238-0:08:10.504	IT2	0.176273	8	0.660358
Trial 1	1.1	S_TWN	F	0:08:10.504-0:08:10.770	IT2	0.233936	8	0.87639
Trial 1	1.1	S_TWN	F	0:08:10.770-0:08:11.036	IT2	0.20697	8	0.775357
Trial 1	1.1	S_TWN	F	0:08:11.036-0:08:11.302	IT2	0.0800646	8	0.299943
Trial 1	1.1	S_TWN	F	0:08:11.302-0:08:11.568	IT2	0.0327172	8	0.122568
Trial 1	1.1	S_TWN	F	0:08:11.568-0:08:11.834	IT2	0.0574607	8	0.215263
Trial 1	1.1	S_TWN	F	0:08:11.834-0:08:12.100	IT2	0.0753393	8	0.282239
Trial 1	1.1	S_TWN	F	0:08:12.100-0:08:12.366	IT2	0.0585497	8	0.219341
Trial 1	1.1	S_TWN	F	0:08:12.366-0:08:12.632	IT2	0.135377	8	0.507158
Trial 1	1.1	S_TWN	F	0:08:12.632-0:08:12.898	IT2	0.906818	8	3.39716
Trial 1	1.1	S_TWN	F	0:08:12.898-0:08:13.164	IT2	1.08731	8	4.07334
Trial 1	1.1	S_TWN	F	0:08:13.164-0:08:13.430	IT2	0.732351	8	2.74357
Trial 1	1.1	S_TWN	F	0:08:13.430-0:08:13.696	IT2	0.393729	8	1.47501
Trial 1	1.1	S_TWN	F	0:08:13.696-0:08:13.962	IT2	1.32158	8	4.951
Trial 1	1.1	S_TWN	F	0:08:13.962-0:08:14.228	IT2	0.166203	8	0.622638
Trial 1	1.1	S_TWN	F	0:08:14.228-0:08:14.494	IT2	0.114178	7	0.488845
Trial 1	1.1	S_TWN	F	0:08:14.494-0:08:14.760	IT2	0.456899	8	1.71166
Trial 1	1.1	S_TWN	F	0:08:14.760-0:08:15.026	IT2	0.614047	8	2.30036
Trial 1	1.1	S_TWN	F	0:08:15.026-0:08:15.292	IT2	0.14755	8	0.552759
Trial 1	1.1	S_TWN	F	0:08:15.292-0:08:15.558	IT2	0.112203	8	0.420345
Trial 1	1.1	S_TWN	F	0:08:15.558-0:08:15.824	IT2	0.403763	8	1.51259
Trial 1	1.1	S_TWN	F	0:08:15.824-0:08:16.090	IT2	0.21933	8	0.821668
Trial 1	1.1	S_TWN	F	0:08:16.090-0:08:16.356	IT2	0.120023	8	0.449633
Trial 1	1.1	S_TWN	F	0:08:16.356-0:08:16.622	IT2	0.883294	8	3.30904
Trial 1	1.1	S_TWN	F	0:08:16.622-0:08:16.888	IT2	0.455137	8	1.70506
Trial 1	1.1	S_TWN	F	0:08:16.888-0:08:17.154	IT2	0.168196	8	0.6301
Trial 1	1.1	S_TWN	F	0:08:17.154-0:08:17.420	IT2	0.123271	8	0.461801
Trial 1	1.1	S_TWN	F	0:08:17.420-0:08:17.686	IT2	0.105614	8	0.395657
Trial 1	1.1	S_TWN	F	0:08:17.686-0:08:17.952	IT2	0.615242	8	2.30484
Trial 1	1.1	S_TWN	F	0:08:17.952-0:08:18.218	IT2	0.117425	8	0.439905
Trial 1	1.1	S_TWN	F	0:08:18.218-0:08:18.484	IT2	0.066496	8	0.249112
Trial 1	1.1	S_TWN	F	0:08:18.484-0:08:18.750	IT2	0.629559	8	2.3585
Trial 1	1.1	S_TWN	F	0:08:18.750-0:08:19.016	IT2	0.0952488	8	0.356824
Trial 1	1.1	S_TWN	F	0:08:19.016-0:08:19.282	IT2	0.0977257	8	0.366104
Trial 1	1.1	S_TWN	F	0:08:19.282-0:08:19.548	IT2	0.0225112	8	0.0843324
Trial 1	1.1	S_TWN	F	0:08:19.548-0:08:19.814	IT2	0.0322325	8	0.120751
Trial 1	1.1	S_TWN	F	0:08:19.814-0:08:20.080	IT2	0.0444724	8	0.166605
Trial 1	1.1	S_TWN	F	0:08:20.080-0:08:20.346	IT2	0.134909	8	0.505402
Trial 1	1.1	S_TWN	F	0:08:20.346-0:08:20.612	IT2	0.464933	8	1.74175
Trial 1	1.1	S_TWN	F	0:08:20.612-0:08:20.878	IT2	0.248999	8	0.932821
Trial 1	1.1	S_TWN	F	0:08:20.878-0:08:21.144	IT2	0.184747	8	0.692109
Trial 1	1.1	S_TWN	F	0:08:21.144-0:08:21.410	IT2	0.25667	8	0.961548
Trial 1	1.1	S_TWN	F	0:08:21.410-0:08:21.676	IT2	0.311719	8	1.16778
Trial 1	1.1	S_TWN	F	0:08:21.676-0:08:21.942	IT2	0.267037	8	1.00039
Trial 1	1.1	S_TWN	F	0:08:21.942-0:08:22.208	IT2	0.200552	8	0.751319
Trial 1	1.1	S_TWN	F	0:08:22.208-0:08:22.474	IT2	0.139256	8	0.521685
Trial 1	1.1	S_TWN	F	0:08:22.474-0:08:22.740	IT2	0.102341	8	0.383397
Trial 1	1.1	S_TWN	F	0:08:22.740-0:08:23.006	IT2	0.0515897	8	0.193268
Trial 1	1.1	S_TWN	F	0:08:23.006-0:08:23.272	IT2	0.0890563	8	0.333627
Trial 1	1.1	S_TWN	F	0:08:23.272-0:08:23.538	IT2	0.157702	8	0.590792
Trial 1	1.1	S_TWN	F	0:08:23.538-0:08:23.804	IT2	0.116133	8	0.435062
Trial 1	1.1	S_TWN	F	0:08:23.804-0:08:24.070	IT2	0.248585	7	1.06429
Trial 1	1.1	S_TWN	F	0:08:24.070-0:08:24.336	IT2	0.314449	8	1.17801
Trial 1	1.1	S_TWN	F	0:08:24.336-0:08:24.602	IT2	0.151385	8	0.567128
Trial 1	1.1	S_TWN	F	0:08:24.602-0:08:24.868	IT2	0.212439	8	0.795851
Trial 1	1.1	S_TWN	F	0:08:24.868-0:08:25.134	IT2	0.195179	8	0.731189
Trial 1	1.1	S_TWN	F	0:08:25.134-0:08:25.400	IT2	0.173385	8	0.649543
Trial 1	1.1	S_TWN	F	0:08:25.400-0:08:25.666	IT2	0.0710945	8	0.266338
Trial 1	1.1	S_TWN	F	0:08:25.666-0:08:25.932	IT2	0.0984759	8	0.368915
Trial 1	1.1	S_TWN	F	0:08:25.932-0:08:26.198	IT2	0.0461055	8	0.172723
Trial 1	1.1	S_TWN	F	0:08:26.198-0:08:26.464	IT2	0.0484257	8	0.181416
Trial 1	1.1	S_TWN	F	0:08:26.464-0:08:26.730	IT2	0.446485	8	1.67264
Trial 1	1.1	S_TWN	F	0:08:26.730-0:08:26.996	IT2	0.249515	8	0.934752
Trial 1	1.1	S_TWN	F	0:08:26.996-0:08:27.262	IT2	0.241	8	0.902842
Trial 1	1.1	S_TWN	F	0:08:27.262-0:08:27.528	IT2	0.121844	8	0.456456
Trial 1	1.1	S_TWN	F	0:08:27.528-0:08:27.794	IT2	0.263073	8	0.985539
Trial 1	1.1	S_TWN	F	0:08:27.794-0:08:28.060	IT2	0.786569	8	2.94668
Trial 1	1.1	S_TWN	F	0:08:28.060-0:08:28.326	IT2	0.341326	8	1.27869
Trial 1	1.1	S_TWN	F	0:08:28.326-0:08:28.592	IT2	0.143618	8	0.538028
Trial 1	1.1	S_TWN	F	0:08:28.592-0:08:28.858	IT2	0.0783478	8	0.29351
Trial 1	1.1	S_TWN	F	0:08:28.858-0:08:29.124	IT2	0.172215	8	0.645162
Trial 1	1.1	S_TWN	F	0:08:29.124-0:08:29.390	IT2	0.0850421	8	0.318588
Trial 1	1.1	S_TWN	F	0:08:29.390-0:08:29.656	IT2	0.174621	8	0.654178
Trial 1	1.1	S_TWN	F	0:08:29.656-0:08:29.922	IT2	0.16825	8	0.630305
Trial 1	1.1	S_TWN	F	0:08:29.922-0:08:30.188	IT2	0.183395	8	0.68704
Trial 1	1.1	S_TWN	F	0:08:30.188-0:08:30.454	IT2	0.1807	8	0.67695
Trial 1	1.1	S_TWN	F	0:08:30.454-0:08:30.720	IT2	0.160694	8	0.601998
Trial 1	1.1	S_TWN	F	0:08:30.720-0:08:30.986	IT2	0.119386	8	0.447246
Trial 1	1.1	S_TWN	F	0:08:30.986-0:08:31.252	IT2	0.167568	8	0.627748
Trial 1	1.1	S_TWN	F	0:08:31.252-0:08:31.518	IT2	0.161334	8	0.604395
Trial 1	1.1	S_TWN	F	0:08:31.518-0:08:31.784	IT2	0.205433	8	0.769603
Trial 1	1.1	S_TWN	F	0:08:31.784-0:08:32.050	IT2	0.0627891	8	0.235224
Trial 1	1.1	S_TWN	F	0:08:32.050-0:08:32.316	IT2	0.091602	8	0.343165
Trial 1	1.1	S_TWN	F	0:08:32.316-0:08:32.582	IT2	0.0465551	8	0.174407
Trial 1	1.1	S_TWN	F	0:08:32.582-0:08:32.848	IT2	0.0249312	8	0.0933987
Trial 1	1.1	S_TWN	F	0:08:32.848-0:08:33.114	IT2	0.0366169	8	0.137176
Trial 1	1.1	S_TWN	F	0:08:33.114-0:08:33.380	IT2	0.0120918	7	0.0517702
Trial 1	1.1	S_TWN	F	0:08:33.380-0:08:33.646	IT2	0.0599636	8	0.224638
Trial 1	1.1	S_TWN	F	0:08:33.646-0:08:33.912	IT2	0.0419303	8	0.157083
Trial 1	1.1	S_TWN	F	0:08:33.912-0:08:34.178	IT2	0.0369412	8	0.13839
Trial 1	1.1	S_TWN	F	0:08:34.178-0:08:34.444	IT2	0.0756547	8	0.283423
Trial 1	1.1	S_TWN	F	0:08:34.444-0:08:34.710	IT2	0.161813	8	0.606187
Trial 1	1.1	S_TWN	F	0:08:34.710-0:08:34.976	IT2	0.18113	8	0.67856
Trial 1	1.1	S_TWN	F	0:08:34.976-0:08:35.242	IT2	0.0842025	8	0.315446
Trial 1	1.1	S_TWN	F	0:08:35.242-0:08:35.508	IT2	0.195757	8	0.733352
Trial 1	1.1	S_TWN	F	0:08:35.508-0:08:35.774	IT2	0.37428	8	1.40215
Trial 1	1.1	S_TWN	F	0:08:35.774-0:08:36.040	IT2	0.283734	8	1.06294
Trial 1	1.1	S_TWN	F	0:08:36.040-0:08:36.306	IT2	0.145339	8	0.544476
Trial 1	1.1	S_TWN	F	0:08:36.306-0:08:36.572	IT2	0.111081	8	0.416139
Trial 1	1.1	S_TWN	F	0:08:36.572-0:08:36.838	IT2	0.0504867	8	0.189136
Trial 1	1.1	S_TWN	F	0:08:36.838-0:08:37.104	IT2	0.0294577	8	0.110356
Trial 1	1.1	S_TWN	F	0:08:37.104-0:08:37.370	IT2	0.07575	8	0.283777
Trial 1	1.1	S_TWN	F	0:08:37.370-0:08:37.636	IT2	0.0796109	8	0.298241
Trial 1	1.1	S_TWN	F	0:08:37.636-0:08:37.902	IT2	0.100613	8	0.376921
Trial 1	1.1	S_TWN	F	0:08:37.902-0:08:38.168	IT2	0.044925	8	0.1683
Trial 1	1.1	S_TWN	F	0:08:38.168-0:08:38.434	IT2	0.0755861	8	0.283168
Trial 1	1.1	S_TWN	F	0:08:38.434-0:08:38.700	IT2	0.122551	8	0.459108
Trial 1	1.1	S_TWN	F	0:08:38.700-0:08:38.966	IT2	0.170633	8	0.639231
Trial 1	1.1	S_TWN	F	0:08:38.966-0:08:39.232	IT2	0.104357	8	0.390948
Trial 1	1.1	S_TWN	F	0:08:39.232-0:08:39.498	IT2	0.0723766	8	0.271141
Trial 1	1.1	S_TWN	F	0:08:39.498-0:08:39.764	IT2	0.57542	8	2.15567
Trial 1	1.1	S_TWN	F	0:08:39.764-0:08:40.030	IT2	0.446993	8	1.67454
Trial 1	1.1	S_TWN	F	0:08:40.030-0:08:40.296	IT2	0.267888	8	1.00357
Trial 1	1.1	S_TWN	F	0:08:40.296-0:08:40.562	IT2	0.423304	8	1.58581
Trial 1	1.1	S_TWN	F	0:08:40.562-0:08:40.828	IT2	0.226516	8	0.848583
Trial 1	1.1	S_TWN	F	0:08:40.828-0:08:41.094	IT2	0.132064	8	0.494747
Trial 1	1.1	S_TWN	F	0:08:41.094-0:08:41.360	IT2	0.100224	8	0.375462
Trial 1	1.1	S_TWN	F	0:08:41.360-0:08:41.626	IT2	0.0766485	8	0.287145
Trial 1	1.1	S_TWN	F	0:08:41.626-0:08:41.892	IT2	0.0487981	8	0.18281
Trial 1	1.1	S_TWN	F	0:08:41.892-0:08:42.158	IT2	0.213076	8	0.798234
Trial 1	1.1	S_TWN	F	0:08:42.158-0:08:42.424	IT2	0.2168	8	0.812187
Trial 1	1.1	S_TWN	F	0:08:42.424-0:08:42.690	IT2	0.0678461	8	0.254167
Trial 1	1.1	S_TWN	F	0:08:42.690-0:08:42.956	IT2	0.0443145	7	0.18973
Trial 1	1.1	S_TWN	F	0:08:42.956-0:08:43.222	IT2	0.0390624	8	0.146337
Trial 1	1.1	S_TWN	F	0:08:43.222-0:08:43.488	IT2	0.0632991	8	0.237134
Trial 1	1.1	S_TWN	F	0:08:43.488-0:08:43.754	IT2	0.0760449	8	0.284882
Trial 1	1.1	S_TWN	F	0:08:43.754-0:08:44.020	IT2	0.0656849	8	0.246073
Trial 1	1.1	S_TWN	F	0:08:44.020-0:08:44.286	IT2	0.0448718	8	0.168102
Trial 1	1.1	S_TWN	F	0:08:44.286-0:08:44.552	IT2	0.0660529	8	0.247452
Trial 1	1.1	S_TWN	F	0:08:44.552-0:08:44.818	IT2	0.17	8	0.636864
Trial 1	1.1	S_TWN	F	0:08:44.818-0:08:45.084	IT2	0.156569	8	0.586548
Trial 1	1.1	S_TWN	F	0:08:45.084-0:08:45.350	IT2	0.09482	8	0.355219
Trial 1	1.1	S_TWN	F	0:08:45.350-0:08:45.616	IT2	0.06148	8	0.230319
Trial 1	1.1	S_TWN	F	0:08:45.616-0:08:45.882	IT2	0.365781	8	1.37031
Trial 1	1.1	S_TWN	F	0:08:45.882-0:08:46.148	IT2	0.455408	8	1.70608
Trial 1	1.1	S_TWN	F	0:08:46.148-0:08:46.414	IT2	0.309374	8	1.15899
Trial 1	1.1	S_TWN	F	0:08:46.414-0:08:46.680	IT2	0.142925	8	0.535432
Trial 1	1.1	S_TWN	F	0:08:46.680-0:08:46.946	IT2	0.0998877	8	0.374203
Trial 1	1.1	S_TWN	F	0:08:46.946-0:08:47.212	IT2	0.0473991	8	0.177569
Trial 1	1.1	S_TWN	F	0:08:47.212-0:08:47.478	IT2	0.0690745	8	0.258772
Trial 1	1.1	S_TWN	F	0:08:47.478-0:08:47.744	IT2	0.066077	8	0.24754
Trial 1	1.1	S_TWN	F	0:08:47.744-0:08:48.010	IT2	0.0529069	8	0.198202
Trial 1	1.1	S_TWN	F	0:08:48.010-0:08:48.276	IT2	0.135098	8	0.506112
Trial 1	1.1	S_TWN	F	0:08:48.276-0:08:48.542	IT2	0.237771	8	0.890749
Trial 1	1.1	S_TWN	F	0:08:48.542-0:08:48.808	IT2	0.295631	8	1.10751
Trial 1	1.1	S_TWN	F	0:08:48.808-0:08:49.074	IT2	0.245621	8	0.920155
Trial 1	1.1	S_TWN	F	0:08:49.074-0:08:49.340	IT2	0.186709	8	0.699461
Trial 1	1.1	S_TWN	F	0:08:49.340-0:08:49.606	IT2	0.701658	8	2.62859
Trial 1	1.1	S_TWN	F	0:08:49.606-0:08:49.872	IT2	0.442699	8	1.65846
Trial 1	1.1	S_TWN	F	0:08:49.872-0:08:50.138	IT2	0.416298	8	1.55956
Trial 1	1.1	S_TWN	F	0:08:50.138-0:08:50.404	IT2	0.519638	8	1.94669
Trial 1	1.1	S_TWN	F	0:08:50.404-0:08:50.670	IT2	0.879226	8	3.2938
Trial 1	1.1	S_TWN	F	0:08:50.670-0:08:50.936	IT2	0.232687	8	0.871702
[truncated: 122,388 more rows]

## Sheet: Day 2
Raw velocity data, extracted via ethovision, which is fed to R source code 1 to detect and extract darts, and to produce velocity traces
Showing Data from Acquisition Day 2 for all animals in Experiment 2
Used to calculate Darts/minute as seen in Figure 4 and Figure 4-figure supplement 1
Trial	Animal	Group	Sex	TimeStamp	StimPeriod	Distance_cm	Samples	Velocity
Trial 1	1.1	S_TWN	F	Start-0:00:00.266	BL	0.293202	7	1.25535
Trial 1	1.1	S_TWN	F	0:00:00.266-0:00:00.532	BL	0.783934	8	2.9368
Trial 1	1.1	S_TWN	F	0:00:00.532-0:00:00.798	BL	0.199341	8	0.746782
Trial 1	1.1	S_TWN	F	0:00:00.798-0:00:01.064	BL	0.362876	8	1.35943
Trial 1	1.1	S_TWN	F	0:00:01.064-0:00:01.330	BL	0.327344	8	1.22631
Trial 1	1.1	S_TWN	F	0:00:01.330-0:00:01.596	BL	0.655738	8	2.45656
Trial 1	1.1	S_TWN	F	0:00:01.596-0:00:01.862	BL	0.999877	8	3.74578
Trial 1	1.1	S_TWN	F	0:00:01.862-0:00:02.128	BL	0.999877	8	3.74578
Trial 1	1.1	S_TWN	F	0:00:02.128-0:00:02.394	BL	0.999877	8	3.7458
Trial 1	1.1	S_TWN	F	0:00:02.394-0:00:02.660	BL	0.999877	8	3.74578
Trial 1	1.1	S_TWN	F	0:00:02.660-0:00:02.926	BL	1.17143	8	4.3885
Trial 1	1.1	S_TWN	F	0:00:02.926-0:00:03.192	BL	1.68934	8	6.32865
Trial 1	1.1	S_TWN	F	0:00:03.192-0:00:03.458	BL	0.386455	8	1.44775
Trial 1	1.1	S_TWN	F	0:00:03.458-0:00:03.724	BL	0.5549	8	2.0788
Trial 1	1.1	S_TWN	F	0:00:03.724-0:00:03.990	BL	0.658068	8	2.46528
Trial 1	1.1	S_TWN	F	0:00:03.990-0:00:04.256	BL	0.391541	8	1.46681
Trial 1	1.1	S_TWN	F	0:00:04.256-0:00:04.522	BL	0.102687	8	0.384691
Trial 1	1.1	S_TWN	F	0:00:04.522-0:00:04.788	BL	0.180336	8	0.675584
Trial 1	1.1	S_TWN	F	0:00:04.788-0:00:05.054	BL	0.379337	8	1.42109
Trial 1	1.1	S_TWN	F	0:00:05.054-0:00:05.320	BL	0.302684	8	1.13393
Trial 1	1.1	S_TWN	F	0:00:05.320-0:00:05.586	BL	0.365593	8	1.3696
Trial 1	1.1	S_TWN	F	0:00:05.586-0:00:05.852	BL	0.561372	8	2.10303
Trial 1	1.1	S_TWN	F	0:00:05.852-0:00:06.118	BL	0.978166	8	3.66445
Trial 1	1.1	S_TWN	F	0:00:06.118-0:00:06.384	BL	0.747848	8	2.80164
Trial 1	1.1	S_TWN	F	0:00:06.384-0:00:06.650	BL	0.648208	8	2.42834
Trial 1	1.1	S_TWN	F	0:00:06.650-0:00:06.916	BL	2.08569	8	7.81355
Trial 1	1.1	S_TWN	F	0:00:06.916-0:00:07.182	BL	1.99522	8	7.47456
Trial 1	1.1	S_TWN	F	0:00:07.182-0:00:07.448	BL	1.02972	8	3.85757
Trial 1	1.1	S_TWN	F	0:00:07.448-0:00:07.714	BL	0.359411	8	1.34645
Trial 1	1.1	S_TWN	F	0:00:07.714-0:00:07.980	BL	2.33651	8	8.75313
Trial 1	1.1	S_TWN	F	0:00:07.980-0:00:08.246	BL	0.971053	8	3.63781
Trial 1	1.1	S_TWN	F	0:00:08.246-0:00:08.512	BL	0.142309	8	0.533121
Trial 1	1.1	S_TWN	F	0:00:08.512-0:00:08.778	BL	0.321905	8	1.20593
Trial 1	1.1	S_TWN	F	0:00:08.778-0:00:09.044	BL	0.139563	8	0.522838
Trial 1	1.1	S_TWN	F	0:00:09.044-0:00:09.310	BL	0.176244	8	0.660254
Trial 1	1.1	S_TWN	F	0:00:09.310-0:00:09.576	BL	0.169599	7	0.726132
Trial 1	1.1	S_TWN	F	0:00:09.576-0:00:09.842	BL	0.194474	8	0.728553
Trial 1	1.1	S_TWN	F	0:00:09.842-0:00:10.108	BL	0.39473	8	1.47875
Trial 1	1.1	S_TWN	F	0:00:10.108-0:00:10.374	BL	1.54448	8	5.78599
Trial 1	1.1	S_TWN	F	0:00:10.374-0:00:10.640	BL	0.924173	8	3.4622
Trial 1	1.1	S_TWN	F	0:00:10.640-0:00:10.906	BL	0.363178	8	1.36055
Trial 1	1.1	S_TWN	F	0:00:10.906-0:00:11.172	BL	0.555947	8	2.08274
Trial 1	1.1	S_TWN	F	0:00:11.172-0:00:11.438	BL	0.455765	8	1.70741
Trial 1	1.1	S_TWN	F	0:00:11.438-0:00:11.704	BL	0.262003	8	0.981526
Trial 1	1.1	S_TWN	F	0:00:11.704-0:00:11.970	BL	0.443743	8	1.66238
Trial 1	1.1	S_TWN	F	0:00:11.970-0:00:12.236	BL	0.204064	8	0.764473
Trial 1	1.1	S_TWN	F	0:00:12.236-0:00:12.502	BL	0.174945	8	0.655389
Trial 1	1.1	S_TWN	F	0:00:12.502-0:00:12.768	BL	0.191175	8	0.716187
Trial 1	1.1	S_TWN	F	0:00:12.768-0:00:13.034	BL	0.0817206	8	0.306146
Trial 1	1.1	S_TWN	F	0:00:13.034-0:00:13.300	BL	0.100824	8	0.377713
Trial 1	1.1	S_TWN	F	0:00:13.300-0:00:13.566	BL	0.0510623	8	0.191291
Trial 1	1.1	S_TWN	F	0:00:13.566-0:00:13.832	BL	0.0439048	8	0.164478
Trial 1	1.1	S_TWN	F	0:00:13.832-0:00:14.098	BL	0.0125354	8	0.0469607
Trial 1	1.1	S_TWN	F	0:00:14.098-0:00:14.364	BL	0.0201924	8	0.0756458
Trial 1	1.1	S_TWN	F	0:00:14.364-0:00:14.630	BL	0.066535	8	0.249257
Trial 1	1.1	S_TWN	F	0:00:14.630-0:00:14.896	BL	0.03055	8	0.114447
Trial 1	1.1	S_TWN	F	0:00:14.896-0:00:15.162	BL	0.0612595	8	0.229494
Trial 1	1.1	S_TWN	F	0:00:15.162-0:00:15.428	BL	0.0325586	8	0.121972
Trial 1	1.1	S_TWN	F	0:00:15.428-0:00:15.694	BL	0.0444826	8	0.166642
Trial 1	1.1	S_TWN	F	0:00:15.694-0:00:15.960	BL	0.0236933	8	0.0887613
Trial 1	1.1	S_TWN	F	0:00:15.960-0:00:16.226	BL	0.0218989	8	0.0820384
Trial 1	1.1	S_TWN	F	0:00:16.226-0:00:16.492	BL	0.0210455	8	0.0788419
Trial 1	1.1	S_TWN	F	0:00:16.492-0:00:16.758	BL	0.0214714	8	0.0804368
Trial 1	1.1	S_TWN	F	0:00:16.758-0:00:17.024	BL	0.38634	8	1.44732
Trial 1	1.1	S_TWN	F	0:00:17.024-0:00:17.290	BL	0.688749	8	2.58023
Trial 1	1.1	S_TWN	F	0:00:17.290-0:00:17.556	BL	0.672307	8	2.51862
Trial 1	1.1	S_TWN	F	0:00:17.556-0:00:17.822	BL	0.635725	8	2.38158
Trial 1	1.1	S_TWN	F	0:00:17.822-0:00:18.088	BL	0.242815	8	0.909645
Trial 1	1.1	S_TWN	F	0:00:18.088-0:00:18.354	BL	0.278147	8	1.04201
Trial 1	1.1	S_TWN	F	0:00:18.354-0:00:18.620	BL	0.236674	8	0.886642
Trial 1	1.1	S_TWN	F	0:00:18.620-0:00:18.886	BL	0.2913	8	1.09129
Trial 1	1.1	S_TWN	F	0:00:18.886-0:00:19.152	BL	0.169627	7	0.726252
Trial 1	1.1	S_TWN	F	0:00:19.152-0:00:19.418	BL	0.192385	8	0.720721
Trial 1	1.1	S_TWN	F	0:00:19.418-0:00:19.684	BL	0.0789074	8	0.295606
Trial 1	1.1	S_TWN	F	0:00:19.684-0:00:19.950	BL	0.128943	8	0.483057
Trial 1	1.1	S_TWN	F	0:00:19.950-0:00:20.216	BL	0.237283	8	0.88892
Trial 1	1.1	S_TWN	F	0:00:20.216-0:00:20.482	BL	0.215038	8	0.805583
Trial 1	1.1	S_TWN	F	0:00:20.482-0:00:20.748	BL	0.19331	8	0.72419
Trial 1	1.1	S_TWN	F	0:00:20.748-0:00:21.014	BL	0.114888	8	0.430397
Trial 1	1.1	S_TWN	F	0:00:21.014-0:00:21.280	BL	0.183832	8	0.68868
Trial 1	1.1	S_TWN	F	0:00:21.280-0:00:21.546	BL	0.0241598	8	0.0905086
Trial 1	1.1	S_TWN	F	0:00:21.546-0:00:21.812	BL	0.14511	8	0.543617
Trial 1	1.1	S_TWN	F	0:00:21.812-0:00:22.078	BL	0.0814637	8	0.305186
Trial 1	1.1	S_TWN	F	0:00:22.078-0:00:22.344	BL	0.189273	8	0.709061
Trial 1	1.1	S_TWN	F	0:00:22.344-0:00:22.610	BL	0.0530662	8	0.1988
Trial 1	1.1	S_TWN	F	0:00:22.610-0:00:22.876	BL	0.198373	8	0.743157
Trial 1	1.1	S_TWN	F	0:00:22.876-0:00:23.142	BL	0.155544	8	0.582703
Trial 1	1.1	S_TWN	F	0:00:23.142-0:00:23.408	BL	0.204396	8	0.765716
Trial 1	1.1	S_TWN	F	0:00:23.408-0:00:23.674	BL	0.159425	8	0.597246
Trial 1	1.1	S_TWN	F	0:00:23.674-0:00:23.940	BL	0.105872	8	0.396625
Trial 1	1.1	S_TWN	F	0:00:23.940-0:00:24.206	BL	0.38626	8	1.44702
Trial 1	1.1	S_TWN	F	0:00:24.206-0:00:24.472	BL	0.242888	8	0.909919
Trial 1	1.1	S_TWN	F	0:00:24.472-0:00:24.738	BL	0.177259	8	0.664054
Trial 1	1.1	S_TWN	F	0:00:24.738-0:00:25.004	BL	0.125822	8	0.47136
Trial 1	1.1	S_TWN	F	0:00:25.004-0:00:25.270	BL	0.146021	8	0.547032
Trial 1	1.1	S_TWN	F	0:00:25.270-0:00:25.536	BL	0.226043	8	0.846809
Trial 1	1.1	S_TWN	F	0:00:25.536-0:00:25.802	BL	0.0773872	8	0.289911
Trial 1	1.1	S_TWN	F	0:00:25.802-0:00:26.068	BL	0.308201	8	1.1546
Trial 1	1.1	S_TWN	F	0:00:26.068-0:00:26.334	BL	0.105308	8	0.394508
Trial 1	1.1	S_TWN	F	0:00:26.334-0:00:26.600	BL	0.15794	8	0.591684
Trial 1	1.1	S_TWN	F	0:00:26.600-0:00:26.866	BL	0.174247	8	0.652771
Trial 1	1.1	S_TWN	F	0:00:26.866-0:00:27.132	BL	0.094214	8	0.352951
Trial 1	1.1	S_TWN	F	0:00:27.132-0:00:27.398	BL	0.109577	8	0.410504
Trial 1	1.1	S_TWN	F	0:00:27.398-0:00:27.664	BL	0.0764235	8	0.286301
Trial 1	1.1	S_TWN	F	0:00:27.664-0:00:27.930	BL	0.1501	8	0.562314
Trial 1	1.1	S_TWN	F	0:00:27.930-0:00:28.196	BL	0.195428	8	0.73212
Trial 1	1.1	S_TWN	F	0:00:28.196-0:00:28.462	BL	0.0889354	8	0.333173
Trial 1	1.1	S_TWN	F	0:00:28.462-0:00:28.728	BL	0.102782	7	0.440056
Trial 1	1.1	S_TWN	F	0:00:28.728-0:00:28.994	BL	0.106052	8	0.3973
Trial 1	1.1	S_TWN	F	0:00:28.994-0:00:29.260	BL	0.112027	8	0.419683
Trial 1	1.1	S_TWN	F	0:00:29.260-0:00:29.526	BL	0.0995381	8	0.372897
Trial 1	1.1	S_TWN	F	0:00:29.526-0:00:29.792	BL	0.0562656	8	0.210784
Trial 1	1.1	S_TWN	F	0:00:29.792-0:00:30.058	BL	0.115289	8	0.431902
Trial 1	1.1	S_TWN	F	0:00:30.058-0:00:30.324	BL	0.173761	8	0.650948
Trial 1	1.1	S_TWN	F	0:00:30.324-0:00:30.590	BL	0.231957	8	0.868971
Trial 1	1.1	S_TWN	F	0:00:30.590-0:00:30.856	BL	0.0698547	8	0.261694
Trial 1	1.1	S_TWN	F	0:00:30.856-0:00:31.122	BL	0.0473636	8	0.177435
Trial 1	1.1	S_TWN	F	0:00:31.122-0:00:31.388	BL	0.0711052	8	0.266376
Trial 1	1.1	S_TWN	F	0:00:31.388-0:00:31.654	BL	0.154999	8	0.580665
Trial 1	1.1	S_TWN	F	0:00:31.654-0:00:31.920	BL	0.121794	8	0.456273
Trial 1	1.1	S_TWN	F	0:00:31.920-0:00:32.186	BL	0.210983	8	0.790399
Trial 1	1.1	S_TWN	F	0:00:32.186-0:00:32.452	BL	0.0877493	8	0.328733
Trial 1	1.1	S_TWN	F	0:00:32.452-0:00:32.718	BL	0.187602	8	0.702807
Trial 1	1.1	S_TWN	F	0:00:32.718-0:00:32.984	BL	0.0595219	8	0.222984
Trial 1	1.1	S_TWN	F	0:00:32.984-0:00:33.250	BL	0.0984296	8	0.36874
Trial 1	1.1	S_TWN	F	0:00:33.250-0:00:33.516	BL	0.051429	8	0.192667
Trial 1	1.1	S_TWN	F	0:00:33.516-0:00:33.782	BL	0.0921534	8	0.345228
Trial 1	1.1	S_TWN	F	0:00:33.782-0:00:34.048	BL	0.189558	8	0.710129
Trial 1	1.1	S_TWN	F	0:00:34.048-0:00:34.314	BL	0.144261	8	0.540441
Trial 1	1.1	S_TWN	F	0:00:34.314-0:00:34.580	BL	0.107696	8	0.403455
Trial 1	1.1	S_TWN	F	0:00:34.580-0:00:34.846	BL	0.132497	8	0.496369
Trial 1	1.1	S_TWN	F	0:00:34.846-0:00:35.112	BL	0.160288	8	0.600478
Trial 1	1.1	S_TWN	F	0:00:35.112-0:00:35.378	BL	0.0568169	8	0.212849
Trial 1	1.1	S_TWN	F	0:00:35.378-0:00:35.644	BL	0.106735	8	0.399854
Trial 1	1.1	S_TWN	F	0:00:35.644-0:00:35.910	BL	0.0465195	8	0.174274
Trial 1	1.1	S_TWN	F	0:00:35.910-0:00:36.176	BL	0.0825812	8	0.309371
Trial 1	1.1	S_TWN	F	0:00:36.176-0:00:36.442	BL	0.0888923	8	0.333011
Trial 1	1.1	S_TWN	F	0:00:36.442-0:00:36.708	BL	0.110298	8	0.413202
Trial 1	1.1	S_TWN	F	0:00:36.708-0:00:36.974	BL	0.0343568	8	0.128709
Trial 1	1.1	S_TWN	F	0:00:36.974-0:00:37.240	BL	0.106647	8	0.399526
Trial 1	1.1	S_TWN	F	0:00:37.240-0:00:37.506	BL	0.147134	8	0.551205
Trial 1	1.1	S_TWN	F	0:00:37.506-0:00:37.772	BL	0.0818391	8	0.30659
Trial 1	1.1	S_TWN	F	0:00:37.772-0:00:38.038	BL	0.155236	7	0.664635
Trial 1	1.1	S_TWN	F	0:00:38.038-0:00:38.304	BL	0.0641364	8	0.240271
Trial 1	1.1	S_TWN	F	0:00:38.304-0:00:38.570	BL	0.120644	8	0.451963
Trial 1	1.1	S_TWN	F	0:00:38.570-0:00:38.836	BL	0.112105	8	0.419971
Trial 1	1.1	S_TWN	F	0:00:38.836-0:00:39.102	BL	0.0730357	8	0.273609
Trial 1	1.1	S_TWN	F	0:00:39.102-0:00:39.368	BL	0.031959	8	0.119726
Trial 1	1.1	S_TWN	F	0:00:39.368-0:00:39.634	BL	0.0222013	8	0.0831721
Trial 1	1.1	S_TWN	F	0:00:39.634-0:00:39.900	BL	0.287229	8	1.07603
Trial 1	1.1	S_TWN	F	0:00:39.900-0:00:40.166	BL	0.207621	8	0.7778
Trial 1	1.1	S_TWN	F	0:00:40.166-0:00:40.432	BL	0.102509	8	0.384024
Trial 1	1.1	S_TWN	F	0:00:40.432-0:00:40.698	BL	0.0801807	8	0.300376
Trial 1	1.1	S_TWN	F	0:00:40.698-0:00:40.964	BL	0.07181	8	0.26902
Trial 1	1.1	S_TWN	F	0:00:40.964-0:00:41.230	BL	0.0499049	8	0.186955
Trial 1	1.1	S_TWN	F	0:00:41.230-0:00:41.496	BL	0.0347986	8	0.130364
Trial 1	1.1	S_TWN	F	0:00:41.496-0:00:41.762	BL	0.0544355	8	0.203929
Trial 1	1.1	S_TWN	F	0:00:41.762-0:00:42.028	BL	0.141068	8	0.528474
Trial 1	1.1	S_TWN	F	0:00:42.028-0:00:42.294	BL	0.12058	8	0.451723
Trial 1	1.1	S_TWN	F	0:00:42.294-0:00:42.560	BL	0.147594	8	0.552929
Trial 1	1.1	S_TWN	F	0:00:42.560-0:00:42.826	BL	0.124169	8	0.465166
Trial 1	1.1	S_TWN	F	0:00:42.826-0:00:43.092	BL	0.0743077	8	0.278377
Trial 1	1.1	S_TWN	F	0:00:43.092-0:00:43.358	BL	0.047182	8	0.176756
Trial 1	1.1	S_TWN	F	0:00:43.358-0:00:43.624	BL	0.0259276	8	0.0971316
Trial 1	1.1	S_TWN	F	0:00:43.624-0:00:43.890	BL	0.145557	8	0.54529
Trial 1	1.1	S_TWN	F	0:00:43.890-0:00:44.156	BL	0.159268	8	0.596661
Trial 1	1.1	S_TWN	F	0:00:44.156-0:00:44.422	BL	0.0655389	8	0.245525
Trial 1	1.1	S_TWN	F	0:00:44.422-0:00:44.688	BL	0.238503	8	0.893486
Trial 1	1.1	S_TWN	F	0:00:44.688-0:00:44.954	BL	0.0604819	8	0.22658
Trial 1	1.1	S_TWN	F	0:00:44.954-0:00:45.220	BL	0.137619	8	0.515553
Trial 1	1.1	S_TWN	F	0:00:45.220-0:00:45.486	BL	0.142246	8	0.532886
Trial 1	1.1	S_TWN	F	0:00:45.486-0:00:45.752	BL	0.0871507	8	0.326489
Trial 1	1.1	S_TWN	F	0:00:45.752-0:00:46.018	BL	0.0427437	8	0.160128
Trial 1	1.1	S_TWN	F	0:00:46.018-0:00:46.284	BL	0.10608	8	0.397399
Trial 1	1.1	S_TWN	F	0:00:46.284-0:00:46.550	BL	0.126079	8	0.47232
Trial 1	1.1	S_TWN	F	0:00:46.550-0:00:46.816	BL	0.157357	8	0.589497
Trial 1	1.1	S_TWN	F	0:00:46.816-0:00:47.082	BL	0.170065	8	0.637107
Trial 1	1.1	S_TWN	F	0:00:47.082-0:00:47.348	BL	0.2903	8	1.08753
Trial 1	1.1	S_TWN	F	0:00:47.348-0:00:47.614	BL	0.202233	7	0.865843
Trial 1	1.1	S_TWN	F	0:00:47.614-0:00:47.880	BL	0.376093	8	1.40894
Trial 1	1.1	S_TWN	F	0:00:47.880-0:00:48.146	BL	0.550922	8	2.06389
Trial 1	1.1	S_TWN	F	0:00:48.146-0:00:48.412	BL	0.602714	8	2.25791
Trial 1	1.1	S_TWN	F	0:00:48.412-0:00:48.678	BL	0.175848	8	0.658769
Trial 1	1.1	S_TWN	F	0:00:48.678-0:00:48.944	BL	0.218292	8	0.817774
Trial 1	1.1	S_TWN	F	0:00:48.944-0:00:49.210	BL	0.348842	8	1.30686
Trial 1	1.1	S_TWN	F	0:00:49.210-0:00:49.476	BL	0.664875	8	2.49078
Trial 1	1.1	S_TWN	F	0:00:49.476-0:00:49.742	BL	0.204554	8	0.766308
Trial 1	1.1	S_TWN	F	0:00:49.742-0:00:50.008	BL	0.258036	8	0.966671
Trial 1	1.1	S_TWN	F	0:00:50.008-0:00:50.274	BL	0.17504	8	0.655743
Trial 1	1.1	S_TWN	F	0:00:50.274-0:00:50.540	BL	0.351363	8	1.3163
Trial 1	1.1	S_TWN	F	0:00:50.540-0:00:50.806	BL	0.166703	8	0.624511
Trial 1	1.1	S_TWN	F	0:00:50.806-0:00:51.072	BL	0.105339	8	0.394623
Trial 1	1.1	S_TWN	F	0:00:51.072-0:00:51.338	BL	0.0657209	8	0.246207
Trial 1	1.1	S_TWN	F	0:00:51.338-0:00:51.604	BL	0.0519569	8	0.194643
Trial 1	1.1	S_TWN	F	0:00:51.604-0:00:51.870	BL	0.0583698	8	0.218668
Trial 1	1.1	S_TWN	F	0:00:51.870-0:00:52.136	BL	0.140859	8	0.527689
Trial 1	1.1	S_TWN	F	0:00:52.136-0:00:52.402	BL	0.252429	8	0.945665
Trial 1	1.1	S_TWN	F	0:00:52.402-0:00:52.668	BL	0.0401623	8	0.150458
Trial 1	1.1	S_TWN	F	0:00:52.668-0:00:52.934	BL	0.0565068	8	0.211689
Trial 1	1.1	S_TWN	F	0:00:52.934-0:00:53.200	BL	0.0455357	8	0.170589
Trial 1	1.1	S_TWN	F	0:00:53.200-0:00:53.466	BL	0.030757	8	0.115223
Trial 1	1.1	S_TWN	F	0:00:53.466-0:00:53.732	BL	0.048945	8	0.183361
Trial 1	1.1	S_TWN	F	0:00:53.732-0:00:53.998	BL	0.157959	8	0.591758
Trial 1	1.1	S_TWN	F	0:00:53.998-0:00:54.264	BL	0.258977	8	0.970187
Trial 1	1.1	S_TWN	F	0:00:54.264-0:00:54.530	BL	0.0346837	8	0.129934
Trial 1	1.1	S_TWN	F	0:00:54.530-0:00:54.796	BL	0.0815043	8	0.305334
Trial 1	1.1	S_TWN	F	0:00:54.796-0:00:55.062	BL	0.116498	8	0.43643
Trial 1	1.1	S_TWN	F	0:00:55.062-0:00:55.328	BL	0.0855866	8	0.320628
Trial 1	1.1	S_TWN	F	0:00:55.328-0:00:55.594	BL	0.14201	8	0.532004
Trial 1	1.1	S_TWN	F	0:00:55.594-0:00:55.860	BL	0.091853	8	0.344109
Trial 1	1.1	S_TWN	F	0:00:55.860-0:00:56.126	BL	0.102712	8	0.384785
Trial 1	1.1	S_TWN	F	0:00:56.126-0:00:56.392	BL	0.0194642	8	0.0729177
Trial 1	1.1	S_TWN	F	0:00:56.392-0:00:56.658	BL	0.0768184	8	0.287782
Trial 1	1.1	S_TWN	F	0:00:56.658-0:00:56.924	BL	0.0275959	8	0.103381
Trial 1	1.1	S_TWN	F	0:00:56.924-0:00:57.190	BL	0.0536326	7	0.229624
Trial 1	1.1	S_TWN	F	0:00:57.190-0:00:57.456	BL	0.0928292	8	0.347764
Trial 1	1.1	S_TWN	F	0:00:57.456-0:00:57.722	BL	0.124179	8	0.465204
Trial 1	1.1	S_TWN	F	0:00:57.722-0:00:57.988	BL	0.0414961	8	0.155455
Trial 1	1.1	S_TWN	F	0:00:57.988-0:00:58.254	BL	0.0455744	8	0.170733
Trial 1	1.1	S_TWN	F	0:00:58.254-0:00:58.520	BL	0.0639843	8	0.239701
Trial 1	1.1	S_TWN	F	0:00:58.520-0:00:58.786	BL	0.0915716	8	0.343052
Trial 1	1.1	S_TWN	F	0:00:58.786-0:00:59.052	BL	0.173774	8	0.651003
Trial 1	1.1	S_TWN	F	0:00:59.052-0:00:59.318	BL	0.0718927	8	0.269329
Trial 1	1.1	S_TWN	F	0:00:59.318-0:00:59.584	BL	0.132752	8	0.497323
Trial 1	1.1	S_TWN	F	0:00:59.584-0:00:59.850	BL	0.0252627	8	0.0946403
Trial 1	1.1	S_TWN	F	0:00:59.850-0:01:00.116	BL	0.0382344	8	0.143236
Trial 1	1.1	S_TWN	F	0:01:00.116-0:01:00.382	BL	0.152103	8	0.569813
Trial 1	1.1	S_TWN	F	0:01:00.382-0:01:00.648	BL	0.146044	8	0.547116
Trial 1	1.1	S_TWN	F	0:01:00.648-0:01:00.914	BL	0.126824	8	0.475117
Trial 1	1.1	S_TWN	F	0:01:00.914-0:01:01.180	BL	0.0986039	8	0.369395
Trial 1	1.1	S_TWN	F	0:01:01.180-0:01:01.446	BL	0.126318	8	0.473218
Trial 1	1.1	S_TWN	F	0:01:01.446-0:01:01.712	BL	0.0622766	8	0.233303
Trial 1	1.1	S_TWN	F	0:01:01.712-0:01:01.978	BL	0.0826125	8	0.309488
Trial 1	1.1	S_TWN	F	0:01:01.978-0:01:02.244	BL	0.0298451	8	0.111807
Trial 1	1.1	S_TWN	F	0:01:02.244-0:01:02.510	BL	0.127391	8	0.477236
Trial 1	1.1	S_TWN	F	0:01:02.510-0:01:02.776	BL	0.0285423	8	0.106926
Trial 1	1.1	S_TWN	F	0:01:02.776-0:01:03.042	BL	0.0178928	8	0.0670309
Trial 1	1.1	S_TWN	F	0:01:03.042-0:01:03.308	BL	0.137605	8	0.515503
Trial 1	1.1	S_TWN	F	0:01:03.308-0:01:03.574	BL	0.117518	8	0.440247
Trial 1	1.1	S_TWN	F	0:01:03.574-0:01:03.840	BL	0.276121	8	1.03442
Trial 1	1.1	S_TWN	F	0:01:03.840-0:01:04.106	BL	0.308463	8	1.15558
Trial 1	1.1	S_TWN	F	0:01:04.106-0:01:04.372	BL	0.231984	8	0.869069
Trial 1	1.1	S_TWN	F	0:01:04.372-0:01:04.638	BL	0.222553	8	0.833745
Trial 1	1.1	S_TWN	F	0:01:04.638-0:01:04.904	BL	0.256937	8	0.962549
Trial 1	1.1	S_TWN	F	0:01:04.904-0:01:05.170	BL	0.13675	8	0.512296
Trial 1	1.1	S_TWN	F	0:01:05.170-0:01:05.436	BL	0.125702	8	0.470915
Trial 1	1.1	S_TWN	F	0:01:05.436-0:01:05.702	BL	0.16174	8	0.605916
Trial 1	1.1	S_TWN	F	0:01:05.702-0:01:05.968	BL	0.0954286	8	0.357503
Trial 1	1.1	S_TWN	F	0:01:05.968-0:01:06.234	BL	0.0967533	8	0.362463
Trial 1	1.1	S_TWN	F	0:01:06.234-0:01:06.500	BL	0.0478022	8	0.179079
Trial 1	1.1	S_TWN	F	0:01:06.500-0:01:06.766	BL	0.19078	7	0.81681
Trial 1	1.1	S_TWN	F	0:01:06.766-0:01:07.032	BL	0.0995841	8	0.373067
Trial 1	1.1	S_TWN	F	0:01:07.032-0:01:07.298	BL	0.0920533	8	0.344853
Trial 1	1.1	S_TWN	F	0:01:07.298-0:01:07.564	BL	0.0458298	8	0.171689
Trial 1	1.1	S_TWN	F	0:01:07.564-0:01:07.830	BL	0.0670748	8	0.251278
Trial 1	1.1	S_TWN	F	0:01:07.830-0:01:08.096	BL	0.070692	8	0.26483
Trial 1	1.1	S_TWN	F	0:01:08.096-0:01:08.362	BL	0.0675028	8	0.252881
Trial 1	1.1	S_TWN	F	0:01:08.362-0:01:08.628	BL	0.113434	8	0.424951
Trial 1	1.1	S_TWN	F	0:01:08.628-0:01:08.894	BL	0.092974	8	0.348307
Trial 1	1.1	S_TWN	F	0:01:08.894-0:01:09.160	BL	0.187647	8	0.702973
Trial 1	1.1	S_TWN	F	0:01:09.160-0:01:09.426	BL	0.0853041	8	0.319571
Trial 1	1.1	S_TWN	F	0:01:09.426-0:01:09.692	BL	0.0512676	8	0.192062
Trial 1	1.1	S_TWN	F	0:01:09.692-0:01:09.958	BL	0.0351273	8	0.131595
Trial 1	1.1	S_TWN	F	0:01:09.958-0:01:10.224	BL	0.0382818	8	0.143414
Trial 1	1.1	S_TWN	F	0:01:10.224-0:01:10.490	BL	0.0730598	8	0.273699
Trial 1	1.1	S_TWN	F	0:01:10.490-0:01:10.756	BL	0.0480825	8	0.180128
Trial 1	1.1	S_TWN	F	0:01:10.756-0:01:11.022	BL	0.101798	8	0.381366
Trial 1	1.1	S_TWN	F	0:01:11.022-0:01:11.288	BL	0.0417766	8	0.156505
Trial 1	1.1	S_TWN	F	0:01:11.288-0:01:11.554	BL	0.0737885	8	0.276431
Trial 1	1.1	S_TWN	F	0:01:11.554-0:01:11.820	BL	0.0460375	8	0.172468
Trial 1	1.1	S_TWN	F	0:01:11.820-0:01:12.086	BL	0.0512873	8	0.192133
Trial 1	1.1	S_TWN	F	0:01:12.086-0:01:12.352	BL	0.129396	8	0.484752
Trial 1	1.1	S_TWN	F	0:01:12.352-0:01:12.618	BL	0.0558763	8	0.209325
Trial 1	1.1	S_TWN	F	0:01:12.618-0:01:12.884	BL	0.102645	8	0.384531
Trial 1	1.1	S_TWN	F	0:01:12.884-0:01:13.150	BL	0.086185	8	0.322869
Trial 1	1.1	S_TWN	F	0:01:13.150-0:01:13.416	BL	0.0628981	8	0.23563
Trial 1	1.1	S_TWN	F	0:01:13.416-0:01:13.682	BL	0.0387508	8	0.145171
Trial 1	1.1	S_TWN	F	0:01:13.682-0:01:13.948	BL	0.0909126	8	0.340582
Trial 1	1.1	S_TWN	F	0:01:13.948-0:01:14.214	BL	0.103785	8	0.388805
Trial 1	1.1	S_TWN	F	0:01:14.214-0:01:14.480	BL	0.0210495	8	0.0788567
Trial 1	1.1	S_TWN	F	0:01:14.480-0:01:14.746	BL	0.0970451	8	0.363554
Trial 1	1.1	S_TWN	F	0:01:14.746-0:01:15.012	BL	0.0827588	8	0.310037
Trial 1	1.1	S_TWN	F	0:01:15.012-0:01:15.278	BL	0.154816	8	0.579984
Trial 1	1.1	S_TWN	F	0:01:15.278-0:01:15.544	BL	0.0600207	8	0.224852
Trial 1	1.1	S_TWN	F	0:01:15.544-0:01:15.810	BL	0.129857	8	0.486473
Trial 1	1.1	S_TWN	F	0:01:15.810-0:01:16.076	BL	0.0187548	7	0.0802977
Trial 1	1.1	S_TWN	F	0:01:16.076-0:01:16.342	BL	0.0888556	8	0.332874
Trial 1	1.1	S_TWN	F	0:01:16.342-0:01:16.608	BL	0.0542929	8	0.203394
Trial 1	1.1	S_TWN	F	0:01:16.608-0:01:16.874	BL	0.0418807	8	0.156896
Trial 1	1.1	S_TWN	F	0:01:16.874-0:01:17.140	BL	0.0595372	8	0.223042
Trial 1	1.1	S_TWN	F	0:01:17.140-0:01:17.406	BL	0.0673476	8	0.2523
Trial 1	1.1	S_TWN	F	0:01:17.406-0:01:17.672	BL	0.0980748	8	0.367414
Trial 1	1.1	S_TWN	F	0:01:17.672-0:01:17.938	BL	0.225775	8	0.845807
Trial 1	1.1	S_TWN	F	0:01:17.938-0:01:18.204	BL	0.210743	8	0.789495
Trial 1	1.1	S_TWN	F	0:01:18.204-0:01:18.470	BL	0.148201	8	0.555197
Trial 1	1.1	S_TWN	F	0:01:18.470-0:01:18.736	BL	0.147068	8	0.550951
Trial 1	1.1	S_TWN	F	0:01:18.736-0:01:19.002	BL	0.10867	8	0.407104
Trial 1	1.1	S_TWN	F	0:01:19.002-0:01:19.268	BL	0.0735068	8	0.275376
Trial 1	1.1	S_TWN	F	0:01:19.268-0:01:19.534	BL	0.0483021	8	0.180951
Trial 1	1.1	S_TWN	F	0:01:19.534-0:01:19.800	BL	0.0218331	8	0.0817926
Trial 1	1.1	S_TWN	F	0:01:19.800-0:01:20.066	BL	0.0763003	8	0.285839
Trial 1	1.1	S_TWN	F	0:01:20.066-0:01:20.332	BL	0.0440555	8	0.165043
Trial 1	1.1	S_TWN	F	0:01:20.332-0:01:20.598	BL	0.0434493	8	0.162771
Trial 1	1.1	S_TWN	F	0:01:20.598-0:01:20.864	BL	0.0134682	8	0.0504552
Trial 1	1.1	S_TWN	F	0:01:20.864-0:01:21.130	BL	0.0239243	8	0.0896273
Trial 1	1.1	S_TWN	F	0:01:21.130-0:01:21.396	BL	0.043529	8	0.163071
Trial 1	1.1	S_TWN	F	0:01:21.396-0:01:21.662	BL	0.0172815	8	0.0647408
Trial 1	1.1	S_TWN	F	0:01:21.662-0:01:21.928	BL	0.0717136	8	0.268656
Trial 1	1.1	S_TWN	F	0:01:21.928-0:01:22.194	BL	0.0561918	8	0.210507
Trial 1	1.1	S_TWN	F	0:01:22.194-0:01:22.460	BL	0.047984	8	0.17976
Trial 1	1.1	S_TWN	F	0:01:22.460-0:01:22.726	BL	0.0348887	8	0.130701
Trial 1	1.1	S_TWN	F	0:01:22.726-0:01:22.992	BL	0.0429293	8	0.160824
Trial 1	1.1	S_TWN	F	0:01:22.992-0:01:23.258	BL	0.0273886	8	0.102604
Trial 1	1.1	S_TWN	F	0:01:23.258-0:01:23.524	BL	0.0245517	8	0.0919764
Trial 1	1.1	S_TWN	F	0:01:23.524-0:01:23.790	BL	0.0287188	8	0.107588
Trial 1	1.1	S_TWN	F	0:01:23.790-0:01:24.056	BL	0.0167858	8	0.0628837
Trial 1	1.1	S_TWN	F	0:01:24.056-0:01:24.322	BL	0.0258935	8	0.0970034
Trial 1	1.1	S_TWN	F	0:01:24.322-0:01:24.588	BL	0.0190033	8	0.0711911
Trial 1	1.1	S_TWN	F	0:01:24.588-0:01:24.854	BL	0.0366207	8	0.13719
Trial 1	1.1	S_TWN	F	0:01:24.854-0:01:25.120	BL	0.146478	8	0.548744
Trial 1	1.1	S_TWN	F	0:01:25.120-0:01:25.386	BL	0.246024	8	0.921666
Trial 1	1.1	S_TWN	F	0:01:25.386-0:01:25.652	BL	0.259015	7	1.10896
Trial 1	1.1	S_TWN	F	0:01:25.652-0:01:25.918	BL	0.136272	8	0.51051
Trial 1	1.1	S_TWN	F	0:01:25.918-0:01:26.184	BL	0.220413	8	0.825722
Trial 1	1.1	S_TWN	F	0:01:26.184-0:01:26.450	BL	0.0450459	8	0.168753
Trial 1	1.1	S_TWN	F	0:01:26.450-0:01:26.716	BL	0.160609	8	0.601683
Trial 1	1.1	S_TWN	F	0:01:26.716-0:01:26.982	BL	0.165351	8	0.619447
Trial 1	1.1	S_TWN	F	0:01:26.982-0:01:27.248	BL	0.261354	8	0.979098
Trial 1	1.1	S_TWN	F	0:01:27.248-0:01:27.514	BL	0.272564	8	1.0211
Trial 1	1.1	S_TWN	F	0:01:27.514-0:01:27.780	BL	0.175196	8	0.656325
Trial 1	1.1	S_TWN	F	0:01:27.780-0:01:28.046	BL	0.141308	8	0.529377
Trial 1	1.1	S_TWN	F	0:01:28.046-0:01:28.312	BL	0.110001	8	0.412088
Trial 1	1.1	S_TWN	F	0:01:28.312-0:01:28.578	BL	0.143523	8	0.537676
Trial 1	1.1	S_TWN	F	0:01:28.578-0:01:28.844	BL	0.0949927	8	0.355865
Trial 1	1.1	S_TWN	F	0:01:28.844-0:01:29.110	BL	0.0920872	8	0.344981
Trial 1	1.1	S_TWN	F	0:01:29.110-0:01:29.376	BL	0.031776	8	0.119041
Trial 1	1.1	S_TWN	F	0:01:29.376-0:01:29.642	BL	0.0523774	8	0.196219
Trial 1	1.1	S_TWN	F	0:01:29.642-0:01:29.908	BL	0.0134089	8	0.050233
Trial 1	1.1	S_TWN	F	0:01:29.908-0:01:30.174	BL	0.0497823	8	0.186496
Trial 1	1.1	S_TWN	F	0:01:30.174-0:01:30.440	BL	0.0518275	8	0.194159
Trial 1	1.1	S_TWN	F	0:01:30.440-0:01:30.706	BL	0.0359577	8	0.134706
Trial 1	1.1	S_TWN	F	0:01:30.706-0:01:30.972	BL	0.024837	8	0.0930452
Trial 1	1.1	S_TWN	F	0:01:30.972-0:01:31.238	BL	0.0520709	8	0.195071
Trial 1	1.1	S_TWN	F	0:01:31.238-0:01:31.504	BL	0.0772942	8	0.289564
Trial 1	1.1	S_TWN	F	0:01:31.504-0:01:31.770	BL	0.0576115	8	0.215827
Trial 1	1.1	S_TWN	F	0:01:31.770-0:01:32.036	BL	0.0870334	8	0.326051
Trial 1	1.1	S_TWN	F	0:01:32.036-0:01:32.302	BL	0.0577451	8	0.216328
Trial 1	1.1	S_TWN	F	0:01:32.302-0:01:32.568	BL	0.0602808	8	0.225827
Trial 1	1.1	S_TWN	F	0:01:32.568-0:01:32.834	BL	0.0455858	8	0.170776
Trial 1	1.1	S_TWN	F	0:01:32.834-0:01:33.100	BL	0.0515128	8	0.192979
Trial 1	1.1	S_TWN	F	0:01:33.100-0:01:33.366	BL	0.0579949	8	0.217263
Trial 1	1.1	S_TWN	F	0:01:33.366-0:01:33.632	BL	0.0463552	8	0.173658
Trial 1	1.1	S_TWN	F	0:01:33.632-0:01:33.898	BL	0.0805686	8	0.30183
Trial 1	1.1	S_TWN	F	0:01:33.898-0:01:34.164	BL	0.0592011	8	0.221781
Trial 1	1.1	S_TWN	F	0:01:34.164-0:01:34.430	BL	0.102567	8	0.384243
Trial 1	1.1	S_TWN	F	0:01:34.430-0:01:34.696	BL	0.0751208	8	0.281421
Trial 1	1.1	S_TWN	F	0:01:34.696-0:01:34.962	BL	0.0776973	8	0.291073
Trial 1	1.1	S_TWN	F	0:01:34.962-0:01:35.228	BL	0.0349708	7	0.149726
Trial 1	1.1	S_TWN	F	0:01:35.228-0:01:35.494	BL	0.0967602	8	0.362488
Trial 1	1.1	S_TWN	F	0:01:35.494-0:01:35.760	BL	0.319211	8	1.19584
Trial 1	1.1	S_TWN	F	0:01:35.760-0:01:36.026	BL	0.308885	8	1.15716
Trial 1	1.1	S_TWN	F	0:01:36.026-0:01:36.292	BL	0.178798	8	0.669819
Trial 1	1.1	S_TWN	F	0:01:36.292-0:01:36.558	BL	0.0551901	8	0.206755
Trial 1	1.1	S_TWN	F	0:01:36.558-0:01:36.824	BL	0.0964892	8	0.361472
Trial 1	1.1	S_TWN	F	0:01:36.824-0:01:37.090	BL	0.085407	8	0.319954
Trial 1	1.1	S_TWN	F	0:01:37.090-0:01:37.356	BL	0.0629111	8	0.235681
Trial 1	1.1	S_TWN	F	0:01:37.356-0:01:37.622	BL	0.0222182	8	0.0832347
Trial 1	1.1	S_TWN	F	0:01:37.622-0:01:37.888	BL	0.0218503	8	0.0818563
Trial 1	1.1	S_TWN	F	0:01:37.888-0:01:38.154	BL	0.0460022	8	0.172336
Trial 1	1.1	S_TWN	F	0:01:38.154-0:01:38.420	BL	0.0239783	8	0.0898281
Trial 1	1.1	S_TWN	F	0:01:38.420-0:01:38.686	BL	0.0336605	8	0.126101
Trial 1	1.1	S_TWN	F	0:01:38.686-0:01:38.952	BL	0.0167277	8	0.0626658
Trial 1	1.1	S_TWN	F	0:01:38.952-0:01:39.218	BL	0.0506959	8	0.189919
Trial 1	1.1	S_TWN	F	0:01:39.218-0:01:39.484	BL	0.0164189	8	0.0615097
Trial 1	1.1	S_TWN	F	0:01:39.484-0:01:39.750	BL	0.0511805	8	0.191734
Trial 1	1.1	S_TWN	F	0:01:39.750-0:01:40.016	BL	0.034135	8	0.127879
Trial 1	1.1	S_TWN	F	0:01:40.016-0:01:40.282	BL	0.0271978	8	0.10189
Trial 1	1.1	S_TWN	F	0:01:40.282-0:01:40.548	BL	0.0502734	8	0.188336
Trial 1	1.1	S_TWN	F	0:01:40.548-0:01:40.814	BL	0.00943981	8	0.0353641
Trial 1	1.1	S_TWN	F	0:01:40.814-0:01:41.080	BL	0.0272114	8	0.101941
Trial 1	1.1	S_TWN	F	0:01:41.080-0:01:41.346	BL	0.0294766	8	0.110428
Trial 1	1.1	S_TWN	F	0:01:41.346-0:01:41.612	BL	0.0580141	8	0.217336
Trial 1	1.1	S_TWN	F	0:01:41.612-0:01:41.878	BL	0.0139043	8	0.052089
Trial 1	1.1	S_TWN	F	0:01:41.878-0:01:42.144	BL	0.0556171	8	0.208356
Trial 1	1.1	S_TWN	F	0:01:42.144-0:01:42.410	BL	0.0273262	8	0.102371
Trial 1	1.1	S_TWN	F	0:01:42.410-0:01:42.676	BL	0.0173754	8	0.0650926
Trial 1	1.1	S_TWN	F	0:01:42.676-0:01:42.942	BL	0.0312915	8	0.117225
Trial 1	1.1	S_TWN	F	0:01:42.942-0:01:43.208	BL	0.0161662	8	0.0605625
Trial 1	1.1	S_TWN	F	0:01:43.208-0:01:43.474	BL	0.0473199	8	0.177272
Trial 1	1.1	S_TWN	F	0:01:43.474-0:01:43.740	BL	0.0305104	8	0.114299
Trial 1	1.1	S_TWN	F	0:01:43.740-0:01:44.006	BL	0.0462705	8	0.173342
Trial 1	1.1	S_TWN	F	0:01:44.006-0:01:44.272	BL	0.0210793	8	0.078968
Trial 1	1.1	S_TWN	F	0:01:44.272-0:01:44.538	BL	0.0982126	8	0.367929
Trial 1	1.1	S_TWN	F	0:01:44.538-0:01:44.804	BL	0.324027	7	1.3873
Trial 1	1.1	S_TWN	F	0:01:44.804-0:01:45.070	BL	0.257856	8	0.965988
Trial 1	1.1	S_TWN	F	0:01:45.070-0:01:45.336	BL	0.720976	8	2.70095
Trial 1	1.1	S_TWN	F	0:01:45.336-0:01:45.602	BL	0.536973	8	2.01163
Trial 1	1.1	S_TWN	F	0:01:45.602-0:01:45.868	BL	0.462564	8	1.73288
Trial 1	1.1	S_TWN	F	0:01:45.868-0:01:46.134	BL	0.731878	8	2.74179
Trial 1	1.1	S_TWN	F	0:01:46.134-0:01:46.400	BL	1.13496	8	4.25184
Trial 1	1.1	S_TWN	F	0:01:46.400-0:01:46.666	BL	0.690803	8	2.58792
Trial 1	1.1	S_TWN	F	0:01:46.666-0:01:46.932	BL	0.487112	8	1.82485
Trial 1	1.1	S_TWN	F	0:01:46.932-0:01:47.198	BL	0.224212	8	0.839956
Trial 1	1.1	S_TWN	F	0:01:47.198-0:01:47.464	BL	0.232491	8	0.870968
Trial 1	1.1	S_TWN	F	0:01:47.464-0:01:47.730	BL	0.37528	8	1.4059
Trial 1	1.1	S_TWN	F	0:01:47.730-0:01:47.996	BL	0.227067	8	0.850653
Trial 1	1.1	S_TWN	F	0:01:47.996-0:01:48.262	BL	0.257306	8	0.963937
Trial 1	1.1	S_TWN	F	0:01:48.262-0:01:48.528	BL	0.17285	8	0.647535
Trial 1	1.1	S_TWN	F	0:01:48.528-0:01:48.794	BL	0.840076	8	3.14712
Trial 1	1.1	S_TWN	F	0:01:48.794-0:01:49.060	BL	2.05885	8	7.71298
Trial 1	1.1	S_TWN	F	0:01:49.060-0:01:49.326	BL	0.55269	8	2.07051
Trial 1	1.1	S_TWN	F	0:01:49.326-0:01:49.592	BL	0.311816	8	1.16814
Trial 1	1.1	S_TWN	F	0:01:49.592-0:01:49.858	BL	0.0963383	8	0.360905
Trial 1	1.1	S_TWN	F	0:01:49.858-0:01:50.124	BL	0.206458	8	0.773437
Trial 1	1.1	S_TWN	F	0:01:50.124-0:01:50.390	BL	0.706902	8	2.64824
Trial 1	1.1	S_TWN	F	0:01:50.390-0:01:50.656	BL	0.253094	8	0.948153
Trial 1	1.1	S_TWN	F	0:01:50.656-0:01:50.922	BL	0.194322	8	0.727983
Trial 1	1.1	S_TWN	F	0:01:50.922-0:01:51.188	BL	0.118286	8	0.443126
Trial 1	1.1	S_TWN	F	0:01:51.188-0:01:51.454	BL	0.0522085	8	0.195586
Trial 1	1.1	S_TWN	F	0:01:51.454-0:01:51.720	BL	0.075654	8	0.283418
Trial 1	1.1	S_TWN	F	0:01:51.720-0:01:51.986	BL	0.0354518	8	0.132811
Trial 1	1.1	S_TWN	F	0:01:51.986-0:01:52.252	BL	0.0329667	8	0.123501
Trial 1	1.1	S_TWN	F	0:01:52.252-0:01:52.518	BL	0.0423562	8	0.158677
Trial 1	1.1	S_TWN	F	0:01:52.518-0:01:52.784	BL	0.133132	8	0.498748
Trial 1	1.1	S_TWN	F	0:01:52.784-0:01:53.050	BL	0.0836663	8	0.313434
Trial 1	1.1	S_TWN	F	0:01:53.050-0:01:53.316	BL	0.0733377	8	0.27474
Trial 1	1.1	S_TWN	F	0:01:53.316-0:01:53.582	BL	0.0590777	8	0.221319
Trial 1	1.1	S_TWN	F	0:01:53.582-0:01:53.848	BL	0.028517	8	0.106833
Trial 1	1.1	S_TWN	F	0:01:53.848-0:01:54.114	BL	0.0203316	7	0.0870479
Trial 1	1.1	S_TWN	F	0:01:54.114-0:01:54.380	BL	0.0626783	8	0.234809
Trial 1	1.1	S_TWN	F	0:01:54.380-0:01:54.646	BL	0.0425344	8	0.159344
Trial 1	1.1	S_TWN	F	0:01:54.646-0:01:54.912	BL	0.0350766	8	0.131405
Trial 1	1.1	S_TWN	F	0:01:54.912-0:01:55.178	BL	0.0362827	8	0.135925
Trial 1	1.1	S_TWN	F	0:01:55.178-0:01:55.444	BL	0.100016	8	0.374681
Trial 1	1.1	S_TWN	F	0:01:55.444-0:01:55.710	BL	0.0339275	8	0.127101
Trial 1	1.1	S_TWN	F	0:01:55.710-0:01:55.976	BL	0.091381	8	0.342335
Trial 1	1.1	S_TWN	F	0:01:55.976-0:01:56.242	BL	0.0520288	8	0.194913
Trial 1	1.1	S_TWN	F	0:01:56.242-0:01:56.508	BL	0.0404739	8	0.151625
Trial 1	1.1	S_TWN	F	0:01:56.508-0:01:56.774	BL	0.0594248	8	0.222619
Trial 1	1.1	S_TWN	F	0:01:56.774-0:01:57.040	BL	0.070282	8	0.263293
Trial 1	1.1	S_TWN	F	0:01:57.040-0:01:57.306	BL	0.084566	8	0.316803
Trial 1	1.1	S_TWN	F	0:01:57.306-0:01:57.572	BL	0.0530759	8	0.198834
Trial 1	1.1	S_TWN	F	0:01:57.572-0:01:57.838	BL	0.102081	8	0.38242
Trial 1	1.1	S_TWN	F	0:01:57.838-0:01:58.104	BL	0.0554087	8	0.207575
Trial 1	1.1	S_TWN	F	0:01:58.104-0:01:58.370	BL	0.0537697	8	0.201434
Trial 1	1.1	S_TWN	F	0:01:58.370-0:01:58.636	BL	0.0712352	8	0.266864
Trial 1	1.1	S_TWN	F	0:01:58.636-0:01:58.902	BL	0.0363962	8	0.13635
Trial 1	1.1	S_TWN	F	0:01:58.902-0:01:59.168	BL	0.0941393	8	0.352671
Trial 1	1.1	S_TWN	F	0:01:59.168-0:01:59.434	BL	0.298124	8	1.11685
Trial 1	1.1	S_TWN	F	0:01:59.434-0:01:59.700	BL	0.124516	8	0.46647
Trial 1	1.1	S_TWN	F	0:01:59.700-0:01:59.966	BL	0.198681	8	0.744305
Trial 1	1.1	S_TWN	F	0:01:59.966-0:02:00.232	BL	0.122145	8	0.457583
Trial 1	1.1	S_TWN	F	0:02:00.232-0:02:00.498	BL	0.0565512	8	0.211856
Trial 1	1.1	S_TWN	F	0:02:00.498-0:02:00.764	BL	0.0668416	8	0.250406
Trial 1	1.1	S_TWN	F	0:02:00.764-0:02:01.030	BL	0.0323099	8	0.121041
Trial 1	1.1	S_TWN	F	0:02:01.030-0:02:01.296	BL	0.0340608	8	0.1276
Trial 1	1.1	S_TWN	F	0:02:01.296-0:02:01.562	BL	0.0495915	8	0.185781
Trial 1	1.1	S_TWN	F	0:02:01.562-0:02:01.828	BL	0.0323152	8	0.121061
Trial 1	1.1	S_TWN	F	0:02:01.828-0:02:02.094	BL	0.0771606	8	0.289063
Trial 1	1.1	S_TWN	F	0:02:02.094-0:02:02.360	BL	0.0269751	8	0.101056
Trial 1	1.1	S_TWN	F	0:02:02.360-0:02:02.626	BL	0.0186637	8	0.069919
Trial 1	1.1	S_TWN	F	0:02:02.626-0:02:02.892	BL	0.0231459	8	0.0867105
Trial 1	1.1	S_TWN	F	0:02:02.892-0:02:03.158	BL	0.0341438	8	0.127911
Trial 1	1.1	S_TWN	F	0:02:03.158-0:02:03.424	BL	0.0242052	8	0.0906786
Trial 1	1.1	S_TWN	F	0:02:03.424-0:02:03.690	BL	0.00906204	7	0.0387987
Trial 1	1.1	S_TWN	F	0:02:03.690-0:02:03.956	BL	0.0473811	8	0.177501
Trial 1	1.1	S_TWN	F	0:02:03.956-0:02:04.222	BL	0.029714	8	0.111316
Trial 1	1.1	S_TWN	F	0:02:04.222-0:02:04.488	BL	0.0408335	8	0.152972
Trial 1	1.1	S_TWN	F	0:02:04.488-0:02:04.754	BL	0.0217082	8	0.0813248
Trial 1	1.1	S_TWN	F	0:02:04.754-0:02:05.020	BL	0.0429973	8	0.161078
Trial 1	1.1	S_TWN	F	0:02:05.020-0:02:05.286	BL	0.410015	8	1.53602
Trial 1	1.1	S_TWN	F	0:02:05.286-0:02:05.552	BL	0.240353	8	0.900421
Trial 1	1.1	S_TWN	F	0:02:05.552-0:02:05.818	BL	0.0695019	8	0.260372
Trial 1	1.1	S_TWN	F	0:02:05.818-0:02:06.084	BL	0.0943413	8	0.353427
Trial 1	1.1	S_TWN	F	0:02:06.084-0:02:06.350	BL	0.128881	8	0.482817
Trial 1	1.1	S_TWN	F	0:02:06.350-0:02:06.616	BL	0.0979009	8	0.366761
Trial 1	1.1	S_TWN	F	0:02:06.616-0:02:06.882	BL	0.0977545	8	0.366212
Trial 1	1.1	S_TWN	F	0:02:06.882-0:02:07.148	BL	0.139392	8	0.522198
Trial 1	1.1	S_TWN	F	0:02:07.148-0:02:07.414	BL	0.162795	8	0.609873
Trial 1	1.1	S_TWN	F	0:02:07.414-0:02:07.680	BL	0.191613	8	0.717831
Trial 1	1.1	S_TWN	F	0:02:07.680-0:02:07.946	BL	0.375567	8	1.40697
Trial 1	1.1	S_TWN	F	0:02:07.946-0:02:08.212	BL	0.620482	8	2.32448
Trial 1	1.1	S_TWN	F	0:02:08.212-0:02:08.478	BL	0.66362	8	2.48608
Trial 1	1.1	S_TWN	F	0:02:08.478-0:02:08.744	BL	0.615145	8	2.30449
Trial 1	1.1	S_TWN	F	0:02:08.744-0:02:09.010	BL	0.150518	8	0.563877
Trial 1	1.1	S_TWN	F	0:02:09.010-0:02:09.276	BL	0.209465	8	0.784711
Trial 1	1.1	S_TWN	F	0:02:09.276-0:02:09.542	BL	0.248662	8	0.931552
Trial 1	1.1	S_TWN	F	0:02:09.542-0:02:09.808	BL	0.172099	8	0.644723
Trial 1	1.1	S_TWN	F	0:02:09.808-0:02:10.074	BL	0.0995456	8	0.372923
Trial 1	1.1	S_TWN	F	0:02:10.074-0:02:10.340	BL	0.141582	8	0.530401
Trial 1	1.1	S_TWN	F	0:02:10.340-0:02:10.606	BL	0.0871589	8	0.326518
Trial 1	1.1	S_TWN	F	0:02:10.606-0:02:10.872	BL	0.0413104	8	0.154759
Trial 1	1.1	S_TWN	F	0:02:10.872-0:02:11.138	BL	0.0887881	8	0.332624
Trial 1	1.1	S_TWN	F	0:02:11.138-0:02:11.404	BL	0.0283847	8	0.106336
Trial 1	1.1	S_TWN	F	0:02:11.404-0:02:11.670	BL	0.0546788	8	0.20484
Trial 1	1.1	S_TWN	F	0:02:11.670-0:02:11.936	BL	0.0281779	8	0.105562
Trial 1	1.1	S_TWN	F	0:02:11.936-0:02:12.202	BL	0.0611501	8	0.229082
Trial 1	1.1	S_TWN	F	0:02:12.202-0:02:12.468	BL	0.0415204	8	0.155545
Trial 1	1.1	S_TWN	F	0:02:12.468-0:02:12.734	BL	0.0402091	8	0.150634
Trial 1	1.1	S_TWN	F	0:02:12.734-0:02:13.000	BL	0.0568772	8	0.213076
Trial 1	1.1	S_TWN	F	0:02:13.000-0:02:13.266	BL	0.044815	7	0.191872
Trial 1	1.1	S_TWN	F	0:02:13.266-0:02:13.532	BL	0.0584282	8	0.218886
Trial 1	1.1	S_TWN	F	0:02:13.532-0:02:13.798	BL	0.0156455	8	0.0586118
Trial 1	1.1	S_TWN	F	0:02:13.798-0:02:14.064	BL	0.0331958	8	0.124361
Trial 1	1.1	S_TWN	F	0:02:14.064-0:02:14.330	BL	0.0250344	8	0.0937847
Trial 1	1.1	S_TWN	F	0:02:14.330-0:02:14.596	BL	0.0188404	8	0.0705805
Trial 1	1.1	S_TWN	F	0:02:14.596-0:02:14.862	BL	0.0294874	8	0.110467
Trial 1	1.1	S_TWN	F	0:02:14.862-0:02:15.128	BL	0.0249341	8	0.0934095
Trial 1	1.1	S_TWN	F	0:02:15.128-0:02:15.394	BL	0.24303	8	0.910455
Trial 1	1.1	S_TWN	F	0:02:15.394-0:02:15.660	BL	0.104889	8	0.392943
Trial 1	1.1	S_TWN	F	0:02:15.660-0:02:15.926	BL	0.0892221	8	0.334248
Trial 1	1.1	S_TWN	F	0:02:15.926-0:02:16.192	BL	0.0405093	8	0.151759
Trial 1	1.1	S_TWN	F	0:02:16.192-0:02:16.458	BL	0.0345299	8	0.129358
Trial 1	1.1	S_TWN	F	0:02:16.458-0:02:16.724	BL	0.0323395	8	0.121152
Trial 1	1.1	S_TWN	F	0:02:16.724-0:02:16.990	BL	0.0566441	8	0.212204
Trial 1	1.1	S_TWN	F	0:02:16.990-0:02:17.256	BL	0.0441331	8	0.165333
Trial 1	1.1	S_TWN	F	0:02:17.256-0:02:17.522	BL	0.0182508	8	0.0683723
Trial 1	1.1	S_TWN	F	0:02:17.522-0:02:17.788	BL	0.0393845	8	0.147544
Trial 1	1.1	S_TWN	F	0:02:17.788-0:02:18.054	BL	0.0477736	8	0.178973
Trial 1	1.1	S_TWN	F	0:02:18.054-0:02:18.320	BL	0.0516329	8	0.193429
Trial 1	1.1	S_TWN	F	0:02:18.320-0:02:18.586	BL	0.0421108	8	0.157757
Trial 1	1.1	S_TWN	F	0:02:18.586-0:02:18.852	BL	0.0324094	8	0.121413
Trial 1	1.1	S_TWN	F	0:02:18.852-0:02:19.118	BL	0.0239147	8	0.0895899
Trial 1	1.1	S_TWN	F	0:02:19.118-0:02:19.384	BL	0.0721979	8	0.270472
Trial 1	1.1	S_TWN	F	0:02:19.384-0:02:19.650	BL	0.0477049	8	0.178714
Trial 1	1.1	S_TWN	F	0:02:19.650-0:02:19.916	BL	0.0187411	8	0.0702087
Trial 1	1.1	S_TWN	F	0:02:19.916-0:02:20.182	BL	0.0456354	8	0.170963
Trial 1	1.1	S_TWN	F	0:02:20.182-0:02:20.448	BL	0.0116407	8	0.0436087
Trial 1	1.1	S_TWN	F	0:02:20.448-0:02:20.714	BL	0.0913695	8	0.342294
Trial 1	1.1	S_TWN	F	0:02:20.714-0:02:20.980	BL	0.0325095	8	0.121789
Trial 1	1.1	S_TWN	F	0:02:20.980-0:02:21.246	BL	0.0401365	8	0.150361
Trial 1	1.1	S_TWN	F	0:02:21.246-0:02:21.512	BL	0.0190416	8	0.0713347
Trial 1	1.1	S_TWN	F	0:02:21.512-0:02:21.778	BL	0.0104738	8	0.0392374
Trial 1	1.1	S_TWN	F	0:02:21.778-0:02:22.044	BL	0.0123082	8	0.0461095
Trial 1	1.1	S_TWN	F	0:02:22.044-0:02:22.310	BL	0.0283017	8	0.106025
Trial 1	1.1	S_TWN	F	0:02:22.310-0:02:22.576	BL	0.0505392	8	0.189333
Trial 1	1.1	S_TWN	F	0:02:22.576-0:02:22.842	BL	0.109805	7	0.470118
Trial 1	1.1	S_TWN	F	0:02:22.842-0:02:23.108	BL	0.194755	8	0.729603
Trial 1	1.1	S_TWN	F	0:02:23.108-0:02:23.374	BL	0.274511	8	1.02838
Trial 1	1.1	S_TWN	F	0:02:23.374-0:02:23.640	BL	0.286693	8	1.07403
Trial 1	1.1	S_TWN	F	0:02:23.640-0:02:23.906	BL	0.200754	8	0.752076
Trial 1	1.1	S_TWN	F	0:02:23.906-0:02:24.172	BL	0.315528	8	1.18205
Trial 1	1.1	S_TWN	F	0:02:24.172-0:02:24.438	BL	0.0739293	8	0.276958
Trial 1	1.1	S_TWN	F	0:02:24.438-0:02:24.704	BL	0.06227	8	0.233279
Trial 1	1.1	S_TWN	F	0:02:24.704-0:02:24.970	BL	0.0556527	8	0.208489
Trial 1	1.1	S_TWN	F	0:02:24.970-0:02:25.236	BL	0.0256158	8	0.0959632
Trial 1	1.1	S_TWN	F	0:02:25.236-0:02:25.502	BL	0.0528542	8	0.198004
Trial 1	1.1	S_TWN	F	0:02:25.502-0:02:25.768	BL	0.0417059	8	0.156241
Trial 1	1.1	S_TWN	F	0:02:25.768-0:02:26.034	BL	0.0479185	8	0.179516
Trial 1	1.1	S_TWN	F	0:02:26.034-0:02:26.300	BL	0.0186382	8	0.0698233
Trial 1	1.1	S_TWN	F	0:02:26.300-0:02:26.566	BL	0.0212534	8	0.0796204
Trial 1	1.1	S_TWN	F	0:02:26.566-0:02:26.832	BL	0.0446689	8	0.167342
Trial 1	1.1	S_TWN	F	0:02:26.832-0:02:27.098	BL	0.0325646	8	0.121995
Trial 1	1.1	S_TWN	F	0:02:27.098-0:02:27.364	BL	0.0519904	8	0.194768
Trial 1	1.1	S_TWN	F	0:02:27.364-0:02:27.630	BL	0.0279572	8	0.104735
Trial 1	1.1	S_TWN	F	0:02:27.630-0:02:27.896	BL	0.0330711	8	0.123892
Trial 1	1.1	S_TWN	F	0:02:27.896-0:02:28.162	BL	0.0110734	8	0.0414836
Trial 1	1.1	S_TWN	F	0:02:28.162-0:02:28.428	BL	0.0133284	8	0.0499313
Trial 1	1.1	S_TWN	F	0:02:28.428-0:02:28.694	BL	0.0165176	8	0.0618791
Trial 1	1.1	S_TWN	F	0:02:28.694-0:02:28.960	BL	0.0106935	8	0.040061
Trial 1	1.1	S_TWN	F	0:02:28.960-0:02:29.226	BL	0.0402329	8	0.150722
Trial 1	1.1	S_TWN	F	0:02:29.226-0:02:29.492	BL	0.0421878	8	0.158046
Trial 1	1.1	S_TWN	F	0:02:29.492-0:02:29.758	BL	0.0782527	8	0.293155
Trial 1	1.1	S_TWN	F	0:02:29.758-0:02:30.024	BL	0.0311789	8	0.116804
Trial 1	1.1	S_TWN	F	0:02:30.024-0:02:30.290	BL	0.0396786	8	0.148646
Trial 1	1.1	S_TWN	F	0:02:30.290-0:02:30.556	BL	0.0248989	8	0.093277
Trial 1	1.1	S_TWN	F	0:02:30.556-0:02:30.822	BL	0.0429883	8	0.161045
Trial 1	1.1	S_TWN	F	0:02:30.822-0:02:31.088	BL	0.0192901	8	0.0722655
Trial 1	1.1	S_TWN	F	0:02:31.088-0:02:31.354	BL	0.0174531	8	0.0653836
Trial 1	1.1	S_TWN	F	0:02:31.354-0:02:31.620	BL	0.0232758	8	0.0871966
Trial 1	1.1	S_TWN	F	0:02:31.620-0:02:31.886	BL	0.0192255	8	0.0720235
Trial 1	1.1	S_TWN	F	0:02:31.886-0:02:32.152	BL	0.0169672	7	0.0726442
Trial 1	1.1	S_TWN	F	0:02:32.152-0:02:32.418	BL	0.0150842	8	0.0565095
Trial 1	1.1	S_TWN	F	0:02:32.418-0:02:32.684	BL	0.046106	8	0.172725
Trial 1	1.1	S_TWN	F	0:02:32.684-0:02:32.950	BL	0.024109	8	0.0903191
Trial 1	1.1	S_TWN	F	0:02:32.950-0:02:33.216	BL	0.0351078	8	0.131523
Trial 1	1.1	S_TWN	F	0:02:33.216-0:02:33.482	BL	0.0237657	8	0.0890319
Trial 1	1.1	S_TWN	F	0:02:33.482-0:02:33.748	BL	0.00917065	8	0.0343557
Trial 1	1.1	S_TWN	F	0:02:33.748-0:02:34.014	BL	0.0463878	8	0.173779
Trial 1	1.1	S_TWN	F	0:02:34.014-0:02:34.280	BL	0.0191615	8	0.0717832
Trial 1	1.1	S_TWN	F	0:02:34.280-0:02:34.546	BL	0.0437064	8	0.163736
Trial 1	1.1	S_TWN	F	0:02:34.546-0:02:34.812	BL	0.0208416	8	0.0780772
Trial 1	1.1	S_TWN	F	0:02:34.812-0:02:35.078	BL	0.0156191	8	0.0585134
Trial 1	1.1	S_TWN	F	0:02:35.078-0:02:35.344	BL	0.0414507	8	0.155284
Trial 1	1.1	S_TWN	F	0:02:35.344-0:02:35.610	BL	0.0459136	8	0.172004
Trial 1	1.1	S_TWN	F	0:02:35.610-0:02:35.876	BL	0.0653494	8	0.244815
Trial 1	1.1	S_TWN	F	0:02:35.876-0:02:36.142	BL	0.012266	8	0.0459513
Trial 1	1.1	S_TWN	F	0:02:36.142-0:02:36.408	BL	0.0470145	8	0.176129
Trial 1	1.1	S_TWN	F	0:02:36.408-0:02:36.674	BL	0.164283	8	0.615443
Trial 1	1.1	S_TWN	F	0:02:36.674-0:02:36.940	BL	0.113889	8	0.426657
Trial 1	1.1	S_TWN	F	0:02:36.940-0:02:37.206	BL	0.152126	8	0.569903
Trial 1	1.1	S_TWN	F	0:02:37.206-0:02:37.472	BL	0.187405	8	0.702062
Trial 1	1.1	S_TWN	F	0:02:37.472-0:02:37.738	BL	0.14895	8	0.558008
Trial 1	1.1	S_TWN	F	0:02:37.738-0:02:38.004	BL	0.0880578	8	0.329887
Trial 1	1.1	S_TWN	F	0:02:38.004-0:02:38.270	BL	0.0417802	8	0.15652
Trial 1	1.1	S_TWN	F	0:02:38.270-0:02:38.536	BL	0.0298533	8	0.111839
Trial 1	1.1	S_TWN	F	0:02:38.536-0:02:38.802	BL	0.0812212	8	0.304274
Trial 1	1.1	S_TWN	F	0:02:38.802-0:02:39.068	BL	0.0133941	8	0.0501777
Trial 1	1.1	S_TWN	F	0:02:39.068-0:02:39.334	BL	0.0364335	8	0.136489
Trial 1	1.1	S_TWN	F	0:02:39.334-0:02:39.600	BL	0.027085	8	0.101467
Trial 1	1.1	S_TWN	F	0:02:39.600-0:02:39.866	BL	0.0265186	8	0.0993451
Trial 1	1.1	S_TWN	F	0:02:39.866-0:02:40.132	BL	0.0263783	8	0.0988196
Trial 1	1.1	S_TWN	F	0:02:40.132-0:02:40.398	BL	0.0143473	8	0.0537489
Trial 1	1.1	S_TWN	F	0:02:40.398-0:02:40.664	BL	0.0144051	8	0.0539652
Trial 1	1.1	S_TWN	F	0:02:40.664-0:02:40.930	BL	0.0148993	8	0.0558167
Trial 1	1.1	S_TWN	F	0:02:40.930-0:02:41.196	BL	0.0347428	8	0.130155
Trial 1	1.1	S_TWN	F	0:02:41.196-0:02:41.462	BL	0.0491285	8	0.184047
Trial 1	1.1	S_TWN	F	0:02:41.462-0:02:41.728	BL	0.0436325	7	0.186809
Trial 1	1.1	S_TWN	F	0:02:41.728-0:02:41.994	BL	0.022624	8	0.0847554
Trial 1	1.1	S_TWN	F	0:02:41.994-0:02:42.260	BL	0.0179364	8	0.0671945
Trial 1	1.1	S_TWN	F	0:02:42.260-0:02:42.526	BL	0.0298092	8	0.111673
Trial 1	1.1	S_TWN	F	0:02:42.526-0:02:42.792	BL	0.0354303	8	0.13273
Trial 1	1.1	S_TWN	F	0:02:42.792-0:02:43.058	BL	0.0391692	8	0.146737
Trial 1	1.1	S_TWN	F	0:02:43.058-0:02:43.324	BL	0.0364137	8	0.136415
Trial 1	1.1	S_TWN	F	0:02:43.324-0:02:43.590	BL	0.040353	8	0.151172
Trial 1	1.1	S_TWN	F	0:02:43.590-0:02:43.856	BL	0.031945	8	0.119674
Trial 1	1.1	S_TWN	F	0:02:43.856-0:02:44.122	BL	0.0501285	8	0.187794
Trial 1	1.1	S_TWN	F	0:02:44.122-0:02:44.388	BL	0.0376931	8	0.141207
Trial 1	1.1	S_TWN	F	0:02:44.388-0:02:44.654	BL	0.0345395	8	0.129393
Trial 1	1.1	S_TWN	F	0:02:44.654-0:02:44.920	BL	0.0290413	8	0.108795
Trial 1	1.1	S_TWN	F	0:02:44.920-0:02:45.186	BL	0.0309972	8	0.116123
Trial 1	1.1	S_TWN	F	0:02:45.186-0:02:45.452	BL	0.0376291	8	0.140968
Trial 1	1.1	S_TWN	F	0:02:45.452-0:02:45.718	BL	0.0206659	8	0.0774198
Trial 1	1.1	S_TWN	F	0:02:45.718-0:02:45.984	BL	0.0203411	8	0.0762027
Trial 1	1.1	S_TWN	F	0:02:45.984-0:02:46.250	BL	0.0267738	8	0.100301
Trial 1	1.1	S_TWN	F	0:02:46.250-0:02:46.516	BL	0.026793	8	0.100373
Trial 1	1.1	S_TWN	F	0:02:46.516-0:02:46.782	BL	0.0131932	8	0.049425
Trial 1	1.1	S_TWN	F	0:02:46.782-0:02:47.048	BL	0.0319046	8	0.119523
Trial 1	1.1	S_TWN	F	0:02:47.048-0:02:47.314	BL	0.0223913	8	0.0838831
Trial 1	1.1	S_TWN	F	0:02:47.314-0:02:47.580	BL	0.189997	8	0.711775
Trial 1	1.1	S_TWN	F	0:02:47.580-0:02:47.846	BL	0.163287	8	0.611713
Trial 1	1.1	S_TWN	F	0:02:47.846-0:02:48.112	BL	0.0923727	8	0.346051
Trial 1	1.1	S_TWN	F	0:02:48.112-0:02:48.378	BL	0.141427	8	0.529818
Trial 1	1.1	S_TWN	F	0:02:48.378-0:02:48.644	BL	0.060917	8	0.228211
Trial 1	1.1	S_TWN	F	0:02:48.644-0:02:48.910	BL	0.0458042	8	0.171593
Trial 1	1.1	S_TWN	F	0:02:48.910-0:02:49.176	BL	0.023999	8	0.0899058
Trial 1	1.1	S_TWN	F	0:02:49.176-0:02:49.442	BL	0.0248926	8	0.093254
Trial 1	1.1	S_TWN	F	0:02:49.442-0:02:49.708	BL	0.0344932	8	0.12922
Trial 1	1.1	S_TWN	F	0:02:49.708-0:02:49.974	BL	0.0314644	8	0.117874
Trial 1	1.1	S_TWN	F	0:02:49.974-0:02:50.240	BL	0.043668	8	0.163591
Trial 1	1.1	S_TWN	F	0:02:50.240-0:02:50.506	BL	0.028591	8	0.10711
Trial 1	1.1	S_TWN	F	0:02:50.506-0:02:50.772	BL	0.0522329	8	0.195678
Trial 1	1.1	S_TWN	F	0:02:50.772-0:02:51.038	BL	0.0100684	8	0.0377185
Trial 1	1.1	S_TWN	F	0:02:51.038-0:02:51.304	BL	0.0264999	7	0.113457
Trial 1	1.1	S_TWN	F	0:02:51.304-0:02:51.570	BL	0.034978	8	0.131036
Trial 1	1.1	S_TWN	F	0:02:51.570-0:02:51.836	BL	0.0290226	8	0.108726
Trial 1	1.1	S_TWN	F	0:02:51.836-0:02:52.102	BL	0.0461351	8	0.172834
Trial 1	1.1	S_TWN	F	0:02:52.102-0:02:52.368	BL	0.0148538	8	0.0556458
Trial 1	1.1	S_TWN	F	0:02:52.368-0:02:52.634	BL	0.100179	8	0.375293
Trial 1	1.1	S_TWN	F	0:02:52.634-0:02:52.900	BL	0.0442396	8	0.165734
Trial 1	1.1	S_TWN	F	0:02:52.900-0:02:53.166	BL	0.043379	8	0.162509
Trial 1	1.1	S_TWN	F	0:02:53.166-0:02:53.432	BL	0.0310385	8	0.116278
Trial 1	1.1	S_TWN	F	0:02:53.432-0:02:53.698	BL	0.0417869	8	0.156544
Trial 1	1.1	S_TWN	F	0:02:53.698-0:02:53.964	BL	0.0185489	8	0.0694885
Trial 1	1.1	S_TWN	F	0:02:53.964-0:02:54.230	BL	0.0218176	8	0.0817338
Trial 1	1.1	S_TWN	F	0:02:54.230-0:02:54.496	BL	0.0358094	8	0.134151
Trial 1	1.1	S_TWN	F	0:02:54.496-0:02:54.762	BL	0.012375	8	0.0463597
Trial 1	1.1	S_TWN	F	0:02:54.762-0:02:55.028	BL	0.0320901	8	0.120217
Trial 1	1.1	S_TWN	F	0:02:55.028-0:02:55.294	BL	0.0253837	8	0.0950933
Trial 1	1.1	S_TWN	F	0:02:55.294-0:02:55.560	BL	0.0450618	8	0.168813
Trial 1	1.1	S_TWN	F	0:02:55.560-0:02:55.826	BL	0.0273746	8	0.102551
Trial 1	1.1	S_TWN	F	0:02:55.826-0:02:56.092	BL	0.0420457	8	0.157515
Trial 1	1.1	S_TWN	F	0:02:56.092-0:02:56.358	BL	0.0198944	8	0.0745289
Trial 1	1.1	S_TWN	F	0:02:56.358-0:02:56.624	BL	0.0278604	8	0.104372
Trial 1	1.1	S_TWN	F	0:02:56.624-0:02:56.890	BL	0.0280809	8	0.105199
Trial 1	1.1	S_TWN	F	0:02:56.890-0:02:57.156	BL	0.00511803	8	0.0191733
Trial 1	1.1	S_TWN	F	0:02:57.156-0:02:57.422	BL	0.0387682	8	0.145236
Trial 1	1.1	S_TWN	F	0:02:57.422-0:02:57.688	BL	0.00712886	8	0.0267063
Trial 1	1.1	S_TWN	F	0:02:57.688-0:02:57.954	BL	0.0242603	8	0.0908847
Trial 1	1.1	S_TWN	F	0:02:57.954-0:02:58.220	BL	0.0276287	8	0.103504
Trial 1	1.1	S_TWN	F	0:02:58.220-0:02:58.486	BL	0.0192849	8	0.072246
Trial 1	1.1	S_TWN	F	0:02:58.486-0:02:58.752	BL	0.0188232	8	0.0705168
Trial 1	1.1	S_TWN	F	0:02:58.752-0:02:59.018	BL	0.0294711	8	0.110406
Trial 1	1.1	S_TWN	F	0:02:59.018-0:02:59.284	BL	0.0362014	8	0.135619
Trial 1	1.1	S_TWN	F	0:02:59.284-0:02:59.550	BL	0.0169291	8	0.0634204
Trial 1	1.1	S_TWN	F	0:02:59.550-0:02:59.816	BL	0.0399738	8	0.149752
Trial 1	1.1	S_TWN	F	0:02:59.816-0:03:00.082	BL	0.0200773	8	0.0752147
Trial 1	1.1	S_TWN	F	0:03:00.082-0:03:00.348	CS1a	0.0341467	8	0.127921
Trial 1	1.1	S_TWN	F	0:03:00.348-0:03:00.614	CS1a	0.00720954	8	0.0270087
Trial 1	1.1	S_TWN	F	0:03:00.614-0:03:00.880	CS1a	0.0454186	7	0.194455
Trial 1	1.1	S_TWN	F	0:03:00.880-0:03:01.146	CS1a	0.013262	8	0.049683
Trial 1	1.1	S_TWN	F	0:03:01.146-0:03:01.412	CS1a	0.0229353	8	0.0859208
Trial 1	1.1	S_TWN	F	0:03:01.412-0:03:01.678	CS1a	0.0370929	8	0.138959
Trial 1	1.1	S_TWN	F	0:03:01.678-0:03:01.944	CS1a	0.0200611	8	0.0751543
Trial 1	1.1	S_TWN	F	0:03:01.944-0:03:02.210	CS1a	0.050404	8	0.188827
Trial 1	1.1	S_TWN	F	0:03:02.210-0:03:02.476	CS1a	0.00407646	8	0.0152715
Trial 1	1.1	S_TWN	F	0:03:02.476-0:03:02.742	CS1a	0.0287821	8	0.107825
Trial 1	1.1	S_TWN	F	0:03:02.742-0:03:03.008	CS1a	0.0182444	8	0.0683479
Trial 1	1.1	S_TWN	F	0:03:03.008-0:03:03.274	CS1a	0.0371197	8	0.139059
Trial 1	1.1	S_TWN	F	0:03:03.274-0:03:03.540	CS1a	0.0289667	8	0.108517
Trial 1	1.1	S_TWN	F	0:03:03.540-0:03:03.806	CS1a	0.0176873	8	0.0662607
Trial 1	1.1	S_TWN	F	0:03:03.806-0:03:04.072	CS1a	0.0398796	8	0.149398
Trial 1	1.1	S_TWN	F	0:03:04.072-0:03:04.338	CS1a	0.0113144	8	0.0423866
Trial 1	1.1	S_TWN	F	0:03:04.338-0:03:04.604	CS1a	0.0276748	8	0.103676
Trial 1	1.1	S_TWN	F	0:03:04.604-0:03:04.870	CS1a	0.00541992	8	0.0203044
Trial 1	1.1	S_TWN	F	0:03:04.870-0:03:05.136	CS1a	0.0432014	8	0.161844
Trial 1	1.1	S_TWN	F	0:03:05.136-0:03:05.402	CS1a	0.213995	8	0.801678
Trial 1	1.1	S_TWN	F	0:03:05.402-0:03:05.668	CS1a	0.187295	8	0.701654
Trial 1	1.1	S_TWN	F	0:03:05.668-0:03:05.934	CS1a	0.201766	8	0.755866
Trial 1	1.1	S_TWN	F	0:03:05.934-0:03:06.200	CS1a	0.182618	8	0.68413
Trial 1	1.1	S_TWN	F	0:03:06.200-0:03:06.466	CS1a	0.184149	8	0.689871
Trial 1	1.1	S_TWN	F	0:03:06.466-0:03:06.732	CS1a	0.204759	8	0.767075
Trial 1	1.1	S_TWN	F	0:03:06.732-0:03:06.998	CS1a	0.0599105	8	0.22444
Trial 1	1.1	S_TWN	F	0:03:06.998-0:03:07.264	CS1a	0.0487875	8	0.18277
Trial 1	1.1	S_TWN	F	0:03:07.264-0:03:07.530	CS1a	0.0898663	8	0.33666
Trial 1	1.1	S_TWN	F	0:03:07.530-0:03:07.796	CS1a	0.0541656	8	0.202919
Trial 1	1.1	S_TWN	F	0:03:07.796-0:03:08.062	CS1a	0.0613259	8	0.229743
Trial 1	1.1	S_TWN	F	0:03:08.062-0:03:08.328	CS1a	0.0492275	8	0.18442
Trial 1	1.1	S_TWN	F	0:03:08.328-0:03:08.594	CS1a	0.0396294	8	0.14846
Trial 1	1.1	S_TWN	F	0:03:08.594-0:03:08.860	CS1a	0.0275851	8	0.10334
Trial 1	1.1	S_TWN	F	0:03:08.860-0:03:09.126	CS1a	0.0219006	8	0.0820453
Trial 1	1.1	S_TWN	F	0:03:09.126-0:03:09.392	CS1a	0.0368066	8	0.137886
Trial 1	1.1	S_TWN	F	0:03:09.392-0:03:09.658	CS1a	0.135099	8	0.506118
Trial 1	1.1	S_TWN	F	0:03:09.658-0:03:09.924	CS1a	0.135333	8	0.50699
Trial 1	1.1	S_TWN	F	0:03:09.924-0:03:10.190	CS1a	0.0624722	7	0.267469
Trial 1	1.1	S_TWN	F	0:03:10.190-0:03:10.456	CS1b	0.128644	8	0.48193
Trial 1	1.1	S_TWN	F	0:03:10.456-0:03:10.722	CS1b	0.0691555	8	0.259072
Trial 1	1.1	S_TWN	F	0:03:10.722-0:03:10.988	CS1b	0.0238707	8	0.0894254
Trial 1	1.1	S_TWN	F	0:03:10.988-0:03:11.254	CS1b	0.0268519	8	0.100594
Trial 1	1.1	S_TWN	F	0:03:11.254-0:03:11.520	CS1b	0.0340087	8	0.127404
Trial 1	1.1	S_TWN	F	0:03:11.520-0:03:11.786	CS1b	0.153743	8	0.575963
Trial 1	1.1	S_TWN	F	0:03:11.786-0:03:12.052	CS1b	0.170031	8	0.636977
Trial 1	1.1	S_TWN	F	0:03:12.052-0:03:12.318	CS1b	0.229052	8	0.858084
Trial 1	1.1	S_TWN	F	0:03:12.318-0:03:12.584	CS1b	0.0622439	8	0.233181
Trial 1	1.1	S_TWN	F	0:03:12.584-0:03:12.850	CS1b	0.0355171	8	0.133056
Trial 1	1.1	S_TWN	F	0:03:12.850-0:03:13.116	CS1b	0.0252653	8	0.0946506
Trial 1	1.1	S_TWN	F	0:03:13.116-0:03:13.382	CS1b	0.0338401	8	0.126774
Trial 1	1.1	S_TWN	F	0:03:13.382-0:03:13.648	CS1b	0.0356207	8	0.133444
Trial 1	1.1	S_TWN	F	0:03:13.648-0:03:13.914	CS1b	0.0232969	8	0.0872764
Trial 1	1.1	S_TWN	F	0:03:13.914-0:03:14.180	CS1b	0.0288356	8	0.108026
Trial 1	1.1	S_TWN	F	0:03:14.180-0:03:14.446	CS1b	0.0164583	8	0.0616574
Trial 1	1.1	S_TWN	F	0:03:14.446-0:03:14.712	CS1b	0.0544286	8	0.203904
Trial 1	1.1	S_TWN	F	0:03:14.712-0:03:14.978	CS1b	0.0234984	8	0.0880305
Trial 1	1.1	S_TWN	F	0:03:14.978-0:03:15.244	CS1b	0.0285193	8	0.10684
Trial 1	1.1	S_TWN	F	0:03:15.244-0:03:15.510	CS1b	0.0410464	8	0.153771
Trial 1	1.1	S_TWN	F	0:03:15.510-0:03:15.776	CS1b	0.0194994	8	0.0730496
Trial 1	1.1	S_TWN	F	0:03:15.776-0:03:16.042	CS1b	0.0602983	8	0.225892
Trial 1	1.1	S_TWN	F	0:03:16.042-0:03:16.308	CS1b	0.0143879	8	0.0539002
Trial 1	1.1	S_TWN	F	0:03:16.308-0:03:16.574	CS1b	0.0439235	8	0.164548
Trial 1	1.1	S_TWN	F	0:03:16.574-0:03:16.840	CS1b	0.0322993	8	0.121001
Trial 1	1.1	S_TWN	F	0:03:16.840-0:03:17.106	CS1b	0.131929	8	0.494243
Trial 1	1.1	S_TWN	F	0:03:17.106-0:03:17.372	CS1b	0.0589388	8	0.220799
Trial 1	1.1	S_TWN	F	0:03:17.372-0:03:17.638	CS1b	0.0554223	8	0.207625
Trial 1	1.1	S_TWN	F	0:03:17.638-0:03:17.904	CS1b	0.086182	8	0.322859
Trial 1	1.1	S_TWN	F	0:03:17.904-0:03:18.170	CS1b	0.0674416	8	0.252652
Trial 1	1.1	S_TWN	F	0:03:18.170-0:03:18.436	CS1b	0.10117	8	0.379009
Trial 1	1.1	S_TWN	F	0:03:18.436-0:03:18.702	CS1b	0.105234	8	0.394231
Trial 1	1.1	S_TWN	F	0:03:18.702-0:03:18.968	CS1b	0.159359	8	0.596999
Trial 1	1.1	S_TWN	F	0:03:18.968-0:03:19.234	CS1b	0.0764631	8	0.286452
Trial 1	1.1	S_TWN	F	0:03:19.234-0:03:19.500	CS1b	0.0849475	8	0.318234
Trial 1	1.1	S_TWN	F	0:03:19.500-0:03:19.766	CS1b	0.0570809	7	0.244389
Trial 1	1.1	S_TWN	F	0:03:19.766-0:03:20.032	CS1b	0.0900426	8	0.337323
Trial 1	1.1	S_TWN	F	0:03:20.032-0:03:20.298	IT1	0.96564	8	3.61753
Trial 1	1.1	S_TWN	F	0:03:20.298-0:03:20.564	IT1	10.7113	8	40.1272
Trial 1	1.1	S_TWN	F	0:03:20.564-0:03:20.830	IT1	9.39889	8	35.2107
Trial 1	1.1	S_TWN	F	0:03:20.830-0:03:21.096	IT1	4.27513	8	16.0157
Trial 1	1.1	S_TWN	F	0:03:21.096-0:03:21.362	IT1	3.26226	8	12.2213
Trial 1	1.1	S_TWN	F	0:03:21.362-0:03:21.628	IT1	6.75201	8	25.2947
Trial 1	1.1	S_TWN	F	0:03:21.628-0:03:21.894	IT1	2.97938	8	11.1615
Trial 1	1.1	S_TWN	F	0:03:21.894-0:03:22.160	IT1	3.25714	8	12.2021
Trial 1	1.1	S_TWN	F	0:03:22.160-0:03:22.426	IT1	2.92233	8	10.9478
Trial 1	1.1	S_TWN	F	0:03:22.426-0:03:22.692	IT1	0.911163	8	3.41345
Trial 1	1.1	S_TWN	F	0:03:22.692-0:03:22.958	IT1	0.810493	8	3.03631
Trial 1	1.1	S_TWN	F	0:03:22.958-0:03:23.224	IT1	0.363023	8	1.35997
Trial 1	1.1	S_TWN	F	0:03:23.224-0:03:23.490	IT1	0.237429	8	0.889472
Trial 1	1.1	S_TWN	F	0:03:23.490-0:03:23.756	IT1	0.429494	8	1.60899
Trial 1	1.1	S_TWN	F	0:03:23.756-0:03:24.022	IT1	0.297888	8	1.11597
Trial 1	1.1	S_TWN	F	0:03:24.022-0:03:24.288	IT1	0.447239	8	1.67546
Trial 1	1.1	S_TWN	F	0:03:24.288-0:03:24.554	IT1	0.219977	8	0.824088
Trial 1	1.1	S_TWN	F	0:03:24.554-0:03:24.820	IT1	0.476825	8	1.78631
Trial 1	1.1	S_TWN	F	0:03:24.820-0:03:25.086	IT1	0.509838	8	1.90998
Trial 1	1.1	S_TWN	F	0:03:25.086-0:03:25.352	IT1	0.67773	8	2.53895
Trial 1	1.1	S_TWN	F	0:03:25.352-0:03:25.618	IT1	0.450365	8	1.68718
Trial 1	1.1	S_TWN	F	0:03:25.618-0:03:25.884	IT1	0.192131	8	0.719769
Trial 1	1.1	S_TWN	F	0:03:25.884-0:03:26.150	IT1	0.163851	8	0.613831
Trial 1	1.1	S_TWN	F	0:03:26.150-0:03:26.416	IT1	0.118657	8	0.444519
Trial 1	1.1	S_TWN	F	0:03:26.416-0:03:26.682	IT1	0.16598	8	0.621805
Trial 1	1.1	S_TWN	F	0:03:26.682-0:03:26.948	IT1	0.0841375	8	0.3152
Trial 1	1.1	S_TWN	F	0:03:26.948-0:03:27.214	IT1	0.151934	8	0.569178
Trial 1	1.1	S_TWN	F	0:03:27.214-0:03:27.480	IT1	0.152048	8	0.569611
Trial 1	1.1	S_TWN	F	0:03:27.480-0:03:27.746	IT1	0.116354	8	0.435891
Trial 1	1.1	S_TWN	F	0:03:27.746-0:03:28.012	IT1	0.125919	8	0.471724
Trial 1	1.1	S_TWN	F	0:03:28.012-0:03:28.278	IT1	0.104591	8	0.391822
Trial 1	1.1	S_TWN	F	0:03:28.278-0:03:28.544	IT1	0.143528	8	0.537688
Trial 1	1.1	S_TWN	F	0:03:28.544-0:03:28.810	IT1	0.0712317	8	0.266852
Trial 1	1.1	S_TWN	F	0:03:28.810-0:03:29.076	IT1	0.136791	8	0.512456
Trial 1	1.1	S_TWN	F	0:03:29.076-0:03:29.342	IT1	0.0935431	7	0.400499
Trial 1	1.1	S_TWN	F	0:03:29.342-0:03:29.608	IT1	0.121966	8	0.456912
Trial 1	1.1	S_TWN	F	0:03:29.608-0:03:29.874	IT1	0.108176	8	0.405253
Trial 1	1.1	S_TWN	F	0:03:29.874-0:03:30.140	IT1	0.0976223	8	0.365718
Trial 1	1.1	S_TWN	F	0:03:30.140-0:03:30.406	IT1	0.180936	8	0.677831
Trial 1	1.1	S_TWN	F	0:03:30.406-0:03:30.672	IT1	0.0867092	8	0.324834
Trial 1	1.1	S_TWN	F	0:03:30.672-0:03:30.938	IT1	0.10554	8	0.395377
Trial 1	1.1	S_TWN	F	0:03:30.938-0:03:31.204	IT1	0.113058	8	0.423544
Trial 1	1.1	S_TWN	F	0:03:31.204-0:03:31.470	IT1	0.115644	8	0.433233
Trial 1	1.1	S_TWN	F	0:03:31.470-0:03:31.736	IT1	0.120101	8	0.44993
Trial 1	1.1	S_TWN	F	0:03:31.736-0:03:32.002	IT1	0.0977411	8	0.366162
Trial 1	1.1	S_TWN	F	0:03:32.002-0:03:32.268	IT1	0.157064	8	0.588403
Trial 1	1.1	S_TWN	F	0:03:32.268-0:03:32.534	IT1	0.089069	8	0.333674
Trial 1	1.1	S_TWN	F	0:03:32.534-0:03:32.800	IT1	0.0906394	8	0.33956
Trial 1	1.1	S_TWN	F	0:03:32.800-0:03:33.066	IT1	0.104838	8	0.39275
Trial 1	1.1	S_TWN	F	0:03:33.066-0:03:33.332	IT1	0.123755	8	0.463613
Trial 1	1.1	S_TWN	F	0:03:33.332-0:03:33.598	IT1	0.14356	8	0.537809
Trial 1	1.1	S_TWN	F	0:03:33.598-0:03:33.864	IT1	0.190319	8	0.712981
Trial 1	1.1	S_TWN	F	0:03:33.864-0:03:34.130	IT1	0.109758	8	0.41118
Trial 1	1.1	S_TWN	F	0:03:34.130-0:03:34.396	IT1	0.249213	8	0.933612
Trial 1	1.1	S_TWN	F	0:03:34.396-0:03:34.662	IT1	0.31798	8	1.19123
Trial 1	1.1	S_TWN	F	0:03:34.662-0:03:34.928	IT1	0.310505	8	1.16323
Trial 1	1.1	S_TWN	F	0:03:34.928-0:03:35.194	IT1	0.342527	8	1.28319
Trial 1	1.1	S_TWN	F	0:03:35.194-0:03:35.460	IT1	0.602921	8	2.2587
Trial 1	1.1	S_TWN	F	0:03:35.460-0:03:35.726	IT1	0.294893	8	1.10474
Trial 1	1.1	S_TWN	F	0:03:35.726-0:03:35.992	IT1	0.259652	8	0.972723
Trial 1	1.1	S_TWN	F	0:03:35.992-0:03:36.258	IT1	0.233441	8	0.874531
Trial 1	1.1	S_TWN	F	0:03:36.258-0:03:36.524	IT1	0.157862	8	0.59139
Trial 1	1.1	S_TWN	F	0:03:36.524-0:03:36.790	IT1	0.127476	8	0.477559
Trial 1	1.1	S_TWN	F	0:03:36.790-0:03:37.056	IT1	0.190666	8	0.714284
Trial 1	1.1	S_TWN	F	0:03:37.056-0:03:37.322	IT1	0.155514	8	0.582593
Trial 1	1.1	S_TWN	F	0:03:37.322-0:03:37.588	IT1	0.307544	8	1.15214
Trial 1	1.1	S_TWN	F	0:03:37.588-0:03:37.854	IT1	0.104288	8	0.390689
Trial 1	1.1	S_TWN	F	0:03:37.854-0:03:38.120	IT1	0.135486	8	0.507565
Trial 1	1.1	S_TWN	F	0:03:38.120-0:03:38.386	IT1	0.1546	8	0.579171
Trial 1	1.1	S_TWN	F	0:03:38.386-0:03:38.652	IT1	0.0976005	8	0.365634
Trial 1	1.1	S_TWN	F	0:03:38.652-0:03:38.918	IT1	0.0496881	7	0.212735
Trial 1	1.1	S_TWN	F	0:03:38.918-0:03:39.184	IT1	0.091078	8	0.341201
Trial 1	1.1	S_TWN	F	0:03:39.184-0:03:39.450	IT1	0.199052	8	0.745698
Trial 1	1.1	S_TWN	F	0:03:39.450-0:03:39.716	IT1	0.0924429	8	0.346317
Trial 1	1.1	S_TWN	F	0:03:39.716-0:03:39.982	IT1	0.156119	8	0.584857
Trial 1	1.1	S_TWN	F	0:03:39.982-0:03:40.248	IT1	0.084928	8	0.318162
Trial 1	1.1	S_TWN	F	0:03:40.248-0:03:40.514	IT1	0.116799	8	0.437558
Trial 1	1.1	S_TWN	F	0:03:40.514-0:03:40.780	IT1	0.0539834	8	0.202234
Trial 1	1.1	S_TWN	F	0:03:40.780-0:03:41.046	IT1	0.0886938	8	0.33227
Trial 1	1.1	S_TWN	F	0:03:41.046-0:03:41.312	IT1	0.0910838	8	0.341223
Trial 1	1.1	S_TWN	F	0:03:41.312-0:03:41.578	IT1	0.0344722	8	0.129141
Trial 1	1.1	S_TWN	F	0:03:41.578-0:03:41.844	IT1	0.0922965	8	0.345767
Trial 1	1.1	S_TWN	F	0:03:41.844-0:03:42.110	IT1	0.0516882	8	0.193636
Trial 1	1.1	S_TWN	F	0:03:42.110-0:03:42.376	IT1	0.0823761	8	0.308601
Trial 1	1.1	S_TWN	F	0:03:42.376-0:03:42.642	IT1	0.0708041	8	0.26525
Trial 1	1.1	S_TWN	F	0:03:42.642-0:03:42.908	IT1	0.106267	8	0.398104
Trial 1	1.1	S_TWN	F	0:03:42.908-0:03:43.174	IT1	0.0536953	8	0.201156
Trial 1	1.1	S_TWN	F	0:03:43.174-0:03:43.440	IT1	0.124365	8	0.465898
Trial 1	1.1	S_TWN	F	0:03:43.440-0:03:43.706	IT1	0.0792656	8	0.29695
Trial 1	1.1	S_TWN	F	0:03:43.706-0:03:43.972	IT1	0.0619905	8	0.232231
Trial 1	1.1	S_TWN	F	0:03:43.972-0:03:44.238	IT1	0.17876	8	0.669681
Trial 1	1.1	S_TWN	F	0:03:44.238-0:03:44.504	IT1	0.290805	8	1.08943
Trial 1	1.1	S_TWN	F	0:03:44.504-0:03:44.770	IT1	0.25462	8	0.953869
Trial 1	1.1	S_TWN	F	0:03:44.770-0:03:45.036	IT1	0.198509	8	0.743667
Trial 1	1.1	S_TWN	F	0:03:45.036-0:03:45.302	IT1	0.245077	8	0.918117
Trial 1	1.1	S_TWN	F	0:03:45.302-0:03:45.568	IT1	0.123424	8	0.462376
Trial 1	1.1	S_TWN	F	0:03:45.568-0:03:45.834	IT1	0.138764	8	0.519847
Trial 1	1.1	S_TWN	F	0:03:45.834-0:03:46.100	IT1	0.0691395	8	0.259014
Trial 1	1.1	S_TWN	F	0:03:46.100-0:03:46.366	IT1	0.0716275	8	0.268334
Trial 1	1.1	S_TWN	F	0:03:46.366-0:03:46.632	IT1	0.164472	8	0.616151
Trial 1	1.1	S_TWN	F	0:03:46.632-0:03:46.898	IT1	0.0717291	8	0.268715
Trial 1	1.1	S_TWN	F	0:03:46.898-0:03:47.164	IT1	0.144135	8	0.539967
Trial 1	1.1	S_TWN	F	0:03:47.164-0:03:47.430	IT1	0.0567095	8	0.212448
Trial 1	1.1	S_TWN	F	0:03:47.430-0:03:47.696	IT1	0.0821443	8	0.307733
Trial 1	1.1	S_TWN	F	0:03:47.696-0:03:47.962	IT1	0.0723771	8	0.271144
Trial 1	1.1	S_TWN	F	0:03:47.962-0:03:48.228	IT1	0.0430067	7	0.184129
Trial 1	1.1	S_TWN	F	0:03:48.228-0:03:48.494	IT1	0.140796	8	0.527457
Trial 1	1.1	S_TWN	F	0:03:48.494-0:03:48.760	IT1	0.0663428	8	0.248537
Trial 1	1.1	S_TWN	F	0:03:48.760-0:03:49.026	IT1	0.0684583	8	0.256461
Trial 1	1.1	S_TWN	F	0:03:49.026-0:03:49.292	IT1	0.0394791	8	0.147899
Trial 1	1.1	S_TWN	F	0:03:49.292-0:03:49.558	IT1	0.120273	8	0.450574
Trial 1	1.1	S_TWN	F	0:03:49.558-0:03:49.824	IT1	0.101254	8	0.379326
Trial 1	1.1	S_TWN	F	0:03:49.824-0:03:50.090	IT1	0.0986757	8	0.369663
Trial 1	1.1	S_TWN	F	0:03:50.090-0:03:50.356	IT1	0.114188	8	0.427778
Trial 1	1.1	S_TWN	F	0:03:50.356-0:03:50.622	IT1	0.0689208	8	0.258196
Trial 1	1.1	S_TWN	F	0:03:50.622-0:03:50.888	IT1	0.15654	8	0.586438
Trial 1	1.1	S_TWN	F	0:03:50.888-0:03:51.154	IT1	0.0338954	8	0.126981
Trial 1	1.1	S_TWN	F	0:03:51.154-0:03:51.420	IT1	0.0747269	8	0.279944
Trial 1	1.1	S_TWN	F	0:03:51.420-0:03:51.686	IT1	0.0599921	8	0.224744
Trial 1	1.1	S_TWN	F	0:03:51.686-0:03:51.952	IT1	0.100718	8	0.377315
Trial 1	1.1	S_TWN	F	0:03:51.952-0:03:52.218	IT1	0.096145	8	0.360182
Trial 1	1.1	S_TWN	F	0:03:52.218-0:03:52.484	IT1	0.105991	8	0.397068
Trial 1	1.1	S_TWN	F	0:03:52.484-0:03:52.750	IT1	0.117018	8	0.438378
Trial 1	1.1	S_TWN	F	0:03:52.750-0:03:53.016	IT1	0.0564912	8	0.211629
Trial 1	1.1	S_TWN	F	0:03:53.016-0:03:53.282	IT1	0.128718	8	0.482212
Trial 1	1.1	S_TWN	F	0:03:53.282-0:03:53.548	IT1	0.070973	8	0.265881
Trial 1	1.1	S_TWN	F	0:03:53.548-0:03:53.814	IT1	0.0926727	8	0.347176
Trial 1	1.1	S_TWN	F	0:03:53.814-0:03:54.080	IT1	0.0939901	8	0.352111
Trial 1	1.1	S_TWN	F	0:03:54.080-0:03:54.346	IT1	0.0747193	8	0.279918
Trial 1	1.1	S_TWN	F	0:03:54.346-0:03:54.612	IT1	0.103878	8	0.389156
Trial 1	1.1	S_TWN	F	0:03:54.612-0:03:54.878	IT1	0.0876523	8	0.328366
Trial 1	1.1	S_TWN	F	0:03:54.878-0:03:55.144	IT1	0.110694	8	0.414687
Trial 1	1.1	S_TWN	F	0:03:55.144-0:03:55.410	IT1	0.0669571	8	0.250837
Trial 1	1.1	S_TWN	F	0:03:55.410-0:03:55.676	IT1	0.136337	8	0.510752
Trial 1	1.1	S_TWN	F	0:03:55.676-0:03:55.942	IT1	0.0243161	8	0.0910939
Trial 1	1.1	S_TWN	F	0:03:55.942-0:03:56.208	IT1	0.127519	8	0.477722
Trial 1	1.1	S_TWN	F	0:03:56.208-0:03:56.474	IT1	0.120666	8	0.452049
Trial 1	1.1	S_TWN	F	0:03:56.474-0:03:56.740	IT1	0.119643	8	0.44821
Trial 1	1.1	S_TWN	F	0:03:56.740-0:03:57.006	IT1	0.108944	8	0.408133
Trial 1	1.1	S_TWN	F	0:03:57.006-0:03:57.272	IT1	0.10192	8	0.381819
Trial 1	1.1	S_TWN	F	0:03:57.272-0:03:57.538	IT1	0.0520408	8	0.194957
Trial 1	1.1	S_TWN	F	0:03:57.538-0:03:57.804	IT1	0.0390722	7	0.167284
Trial 1	1.1	S_TWN	F	0:03:57.804-0:03:58.070	IT1	0.14323	8	0.536574
Trial 1	1.1	S_TWN	F	0:03:58.070-0:03:58.336	IT1	0.170594	8	0.639087
Trial 1	1.1	S_TWN	F	0:03:58.336-0:03:58.602	IT1	0.19817	8	0.742397
Trial 1	1.1	S_TWN	F	0:03:58.602-0:03:58.868	IT1	0.220833	8	0.827298
Trial 1	1.1	S_TWN	F	0:03:58.868-0:03:59.134	IT1	0.194972	8	0.730413
Trial 1	1.1	S_TWN	F	0:03:59.134-0:03:59.400	IT1	0.132968	8	0.498136
Trial 1	1.1	S_TWN	F	0:03:59.400-0:03:59.666	IT1	0.106901	8	0.400477
Trial 1	1.1	S_TWN	F	0:03:59.666-0:03:59.932	IT1	0.0648174	8	0.242821
Trial 1	1.1	S_TWN	F	0:03:59.932-0:04:00.198	IT1	0.111379	8	0.417255
Trial 1	1.1	S_TWN	F	0:04:00.198-0:04:00.464	IT1	0.176244	8	0.660252
Trial 1	1.1	S_TWN	F	0:04:00.464-0:04:00.730	IT1	0.0572715	8	0.214554
Trial 1	1.1	S_TWN	F	0:04:00.730-0:04:00.996	IT1	0.0392801	8	0.147153
Trial 1	1.1	S_TWN	F	0:04:00.996-0:04:01.262	IT1	0.091161	8	0.34151
Trial 1	1.1	S_TWN	F	0:04:01.262-0:04:01.528	IT1	0.0953016	8	0.357026
Trial 1	1.1	S_TWN	F	0:04:01.528-0:04:01.794	IT1	0.0835295	8	0.312924
Trial 1	1.1	S_TWN	F	0:04:01.794-0:04:02.060	IT1	0.156493	8	0.586265
Trial 1	1.1	S_TWN	F	0:04:02.060-0:04:02.326	IT1	0.174392	8	0.653315
Trial 1	1.1	S_TWN	F	0:04:02.326-0:04:02.592	IT1	0.0995429	8	0.372911
Trial 1	1.1	S_TWN	F	0:04:02.592-0:04:02.858	IT1	0.139677	8	0.523269
Trial 1	1.1	S_TWN	F	0:04:02.858-0:04:03.124	IT1	0.0714065	8	0.267506
Trial 1	1.1	S_TWN	F	0:04:03.124-0:04:03.390	IT1	0.12796	8	0.47937
Trial 1	1.1	S_TWN	F	0:04:03.390-0:04:03.656	IT1	0.0550612	8	0.206273
Trial 1	1.1	S_TWN	F	0:04:03.656-0:04:03.922	IT1	0.106725	8	0.39982
Trial 1	1.1	S_TWN	F	0:04:03.922-0:04:04.188	IT1	0.0889438	8	0.333206
Trial 1	1.1	S_TWN	F	0:04:04.188-0:04:04.454	IT1	0.141874	8	0.531493
Trial 1	1.1	S_TWN	F	0:04:04.454-0:04:04.720	IT1	0.139352	8	0.522048
Trial 1	1.1	S_TWN	F	0:04:04.720-0:04:04.986	IT1	0.0494642	8	0.185305
Trial 1	1.1	S_TWN	F	0:04:04.986-0:04:05.252	IT1	0.146679	8	0.549503
Trial 1	1.1	S_TWN	F	0:04:05.252-0:04:05.518	IT1	0.0654161	8	0.245064
Trial 1	1.1	S_TWN	F	0:04:05.518-0:04:05.784	IT1	0.0956039	8	0.358155
Trial 1	1.1	S_TWN	F	0:04:05.784-0:04:06.050	IT1	0.0811829	8	0.30413
Trial 1	1.1	S_TWN	F	0:04:06.050-0:04:06.316	IT1	0.135449	8	0.507423
Trial 1	1.1	S_TWN	F	0:04:06.316-0:04:06.582	IT1	0.0759354	8	0.284472
Trial 1	1.1	S_TWN	F	0:04:06.582-0:04:06.848	IT1	0.0975774	8	0.365551
Trial 1	1.1	S_TWN	F	0:04:06.848-0:04:07.114	IT1	0.0603808	8	0.226201
Trial 1	1.1	S_TWN	F	0:04:07.114-0:04:07.380	IT1	0.0704831	7	0.301768
Trial 1	1.1	S_TWN	F	0:04:07.380-0:04:07.646	IT1	0.137921	8	0.516688
Trial 1	1.1	S_TWN	F	0:04:07.646-0:04:07.912	IT1	0.0400798	8	0.150148
Trial 1	1.1	S_TWN	F	0:04:07.912-0:04:08.178	IT1	0.26328	8	0.986314
Trial 1	1.1	S_TWN	F	0:04:08.178-0:04:08.444	IT1	0.192449	8	0.72096
Trial 1	1.1	S_TWN	F	0:04:08.444-0:04:08.710	IT1	0.218194	8	0.817411
Trial 1	1.1	S_TWN	F	0:04:08.710-0:04:08.976	IT1	0.0709754	8	0.265893
Trial 1	1.1	S_TWN	F	0:04:08.976-0:04:09.242	IT1	0.0510965	8	0.191419
Trial 1	1.1	S_TWN	F	0:04:09.242-0:04:09.508	IT1	0.0978151	8	0.366441
Trial 1	1.1	S_TWN	F	0:04:09.508-0:04:09.774	IT1	0.0798805	8	0.299251
Trial 1	1.1	S_TWN	F	0:04:09.774-0:04:10.040	IT1	0.0855635	8	0.320542
Trial 1	1.1	S_TWN	F	0:04:10.040-0:04:10.306	IT1	0.0687472	8	0.257543
Trial 1	1.1	S_TWN	F	0:04:10.306-0:04:10.572	IT1	0.256117	8	0.959476
Trial 1	1.1	S_TWN	F	0:04:10.572-0:04:10.838	IT1	0.294889	8	1.10473
Trial 1	1.1	S_TWN	F	0:04:10.838-0:04:11.104	IT1	0.175561	8	0.657693
Trial 1	1.1	S_TWN	F	0:04:11.104-0:04:11.370	IT1	0.0818171	8	0.306506
Trial 1	1.1	S_TWN	F	0:04:11.370-0:04:11.636	IT1	0.0873703	8	0.327311
Trial 1	1.1	S_TWN	F	0:04:11.636-0:04:11.902	IT1	0.255529	8	0.957275
Trial 1	1.1	S_TWN	F	0:04:11.902-0:04:12.168	IT1	0.438468	8	1.64262
Trial 1	1.1	S_TWN	F	0:04:12.168-0:04:12.434	IT1	0.272319	8	1.02018
Trial 1	1.1	S_TWN	F	0:04:12.434-0:04:12.700	IT1	0.230053	8	0.861832
Trial 1	1.1	S_TWN	F	0:04:12.700-0:04:12.966	IT1	0.401213	8	1.50305
Trial 1	1.1	S_TWN	F	0:04:12.966-0:04:13.232	IT1	0.275341	8	1.0315
Trial 1	1.1	S_TWN	F	0:04:13.232-0:04:13.498	IT1	0.291306	8	1.09131
Trial 1	1.1	S_TWN	F	0:04:13.498-0:04:13.764	IT1	0.287449	8	1.07685
Trial 1	1.1	S_TWN	F	0:04:13.764-0:04:14.030	IT1	0.195909	8	0.733923
Trial 1	1.1	S_TWN	F	0:04:14.030-0:04:14.296	IT1	0.134039	8	0.502147
Trial 1	1.1	S_TWN	F	0:04:14.296-0:04:14.562	IT1	0.114686	8	0.429643
Trial 1	1.1	S_TWN	F	0:04:14.562-0:04:14.828	IT1	0.200654	8	0.751701
Trial 1	1.1	S_TWN	F	0:04:14.828-0:04:15.094	IT1	0.277231	8	1.03858
Trial 1	1.1	S_TWN	F	0:04:15.094-0:04:15.360	IT1	0.23258	8	0.871301
Trial 1	1.1	S_TWN	F	0:04:15.360-0:04:15.626	IT1	0.116035	8	0.434695
Trial 1	1.1	S_TWN	F	0:04:15.626-0:04:15.892	IT1	0.0854165	8	0.31999
Trial 1	1.1	S_TWN	F	0:04:15.892-0:04:16.158	IT1	0.116701	8	0.437193
Trial 1	1.1	S_TWN	F	0:04:16.158-0:04:16.424	IT1	0.0924413	8	0.346307
Trial 1	1.1	S_TWN	F	0:04:16.424-0:04:16.690	IT1	0.131059	7	0.561122
Trial 1	1.1	S_TWN	F	0:04:16.690-0:04:16.956	IT1	0.133936	8	0.501756
Trial 1	1.1	S_TWN	F	0:04:16.956-0:04:17.222	IT1	0.2084	8	0.78072
Trial 1	1.1	S_TWN	F	0:04:17.222-0:04:17.488	IT1	0.12218	8	0.45772
Trial 1	1.1	S_TWN	F	0:04:17.488-0:04:17.754	IT1	0.172069	8	0.644614
Trial 1	1.1	S_TWN	F	0:04:17.754-0:04:18.020	IT1	0.14623	8	0.547817
Trial 1	1.1	S_TWN	F	0:04:18.020-0:04:18.286	IT1	0.0767784	8	0.28763
Trial 1	1.1	S_TWN	F	0:04:18.286-0:04:18.552	IT1	0.118162	8	0.442663
Trial 1	1.1	S_TWN	F	0:04:18.552-0:04:18.818	IT1	0.0859565	8	0.322014
Trial 1	1.1	S_TWN	F	0:04:18.818-0:04:19.084	IT1	0.0789383	8	0.295722
Trial 1	1.1	S_TWN	F	0:04:19.084-0:04:19.350	IT1	0.0595945	8	0.223256
Trial 1	1.1	S_TWN	F	0:04:19.350-0:04:19.616	IT1	0.0969283	8	0.363117
Trial 1	1.1	S_TWN	F	0:04:19.616-0:04:19.882	IT1	0.178295	8	0.667939
Trial 1	1.1	S_TWN	F	0:04:19.882-0:04:20.148	IT1	0.145414	8	0.544758
Trial 1	1.1	S_TWN	F	0:04:20.148-0:04:20.414	IT1	0.169082	8	0.633427
Trial 1	1.1	S_TWN	F	0:04:20.414-0:04:20.680	IT1	0.0713454	8	0.267277
Trial 1	1.1	S_TWN	F	0:04:20.680-0:04:20.946	IT1	0.317283	8	1.18862
Trial 1	1.1	S_TWN	F	0:04:20.946-0:04:21.212	IT1	0.132682	8	0.497059
Trial 1	1.1	S_TWN	F	0:04:21.212-0:04:21.478	IT1	0.0535063	8	0.200447
Trial 1	1.1	S_TWN	F	0:04:21.478-0:04:21.744	IT1	0.222778	8	0.834591
Trial 1	1.1	S_TWN	F	0:04:21.744-0:04:22.010	IT1	0.326228	8	1.22213
Trial 1	1.1	S_TWN	F	0:04:22.010-0:04:22.276	IT1	0.119887	8	0.449126
Trial 1	1.1	S_TWN	F	0:04:22.276-0:04:22.542	IT1	0.0807139	8	0.302374
Trial 1	1.1	S_TWN	F	0:04:22.542-0:04:22.808	IT1	0.190589	8	0.713993
Trial 1	1.1	S_TWN	F	0:04:22.808-0:04:23.074	IT1	0.0861811	8	0.322857
Trial 1	1.1	S_TWN	F	0:04:23.074-0:04:23.340	IT1	0.141346	8	0.529517
Trial 1	1.1	S_TWN	F	0:04:23.340-0:04:23.606	IT1	0.0888762	8	0.33295
Trial 1	1.1	S_TWN	F	0:04:23.606-0:04:23.872	IT1	0.176784	8	0.662275
Trial 1	1.1	S_TWN	F	0:04:23.872-0:04:24.138	IT1	0.085267	8	0.319433
Trial 1	1.1	S_TWN	F	0:04:24.138-0:04:24.404	IT1	0.0949386	8	0.355665
Trial 1	1.1	S_TWN	F	0:04:24.404-0:04:24.670	IT1	0.0590498	8	0.221215
Trial 1	1.1	S_TWN	F	0:04:24.670-0:04:24.936	IT1	0.127603	8	0.478031
Trial 1	1.1	S_TWN	F	0:04:24.936-0:04:25.202	IT1	0.0674213	8	0.252577
Trial 1	1.1	S_TWN	F	0:04:25.202-0:04:25.468	IT1	0.08432	8	0.315882
Trial 1	1.1	S_TWN	F	0:04:25.468-0:04:25.734	IT1	0.0907656	8	0.340032
Trial 1	1.1	S_TWN	F	0:04:25.734-0:04:26.000	IT1	0.128273	8	0.480542
Trial 1	1.1	S_TWN	F	0:04:26.000-0:04:26.266	IT1	0.159588	7	0.683264
Trial 1	1.1	S_TWN	F	0:04:26.266-0:04:26.532	IT1	0.0486477	8	0.182246
Trial 1	1.1	S_TWN	F	0:04:26.532-0:04:26.798	IT1	0.126587	8	0.474226
Trial 1	1.1	S_TWN	F	0:04:26.798-0:04:27.064	IT1	0.0847798	8	0.317607
Trial 1	1.1	S_TWN	F	0:04:27.064-0:04:27.330	IT1	0.121366	8	0.454664
Trial 1	1.1	S_TWN	F	0:04:27.330-0:04:27.596	IT1	0.149561	8	0.560294
Trial 1	1.1	S_TWN	F	0:04:27.596-0:04:27.862	IT1	0.0453527	8	0.169902
Trial 1	1.1	S_TWN	F	0:04:27.862-0:04:28.128	IT1	0.122234	8	0.457918
Trial 1	1.1	S_TWN	F	0:04:28.128-0:04:28.394	IT1	0.125011	8	0.468321
Trial 1	1.1	S_TWN	F	0:04:28.394-0:04:28.660	IT1	0.15633	8	0.58565
Trial 1	1.1	S_TWN	F	0:04:28.660-0:04:28.926	IT1	0.0494419	8	0.185222
Trial 1	1.1	S_TWN	F	0:04:28.926-0:04:29.192	IT1	0.151511	8	0.567597
Trial 1	1.1	S_TWN	F	0:04:29.192-0:04:29.458	IT1	0.141408	8	0.529745
Trial 1	1.1	S_TWN	F	0:04:29.458-0:04:29.724	IT1	0.0927956	8	0.347634
Trial 1	1.1	S_TWN	F	0:04:29.724-0:04:29.990	IT1	0.285992	8	1.0714
Trial 1	1.1	S_TWN	F	0:04:29.990-0:04:30.256	IT1	0.288025	8	1.07901
Trial 1	1.1	S_TWN	F	0:04:30.256-0:04:30.522	IT1	0.183731	8	0.688303
Trial 1	1.1	S_TWN	F	0:04:30.522-0:04:30.788	IT1	0.148701	8	0.557068
Trial 1	1.1	S_TWN	F	0:04:30.788-0:04:31.054	IT1	0.112142	8	0.420114
Trial 1	1.1	S_TWN	F	0:04:31.054-0:04:31.320	IT1	0.1528	8	0.572425
Trial 1	1.1	S_TWN	F	0:04:31.320-0:04:31.586	IT1	0.212932	8	0.797701
Trial 1	1.1	S_TWN	F	0:04:31.586-0:04:31.852	IT1	0.169401	8	0.634624
Trial 1	1.1	S_TWN	F	0:04:31.852-0:04:32.118	IT1	0.201222	8	0.753826
Trial 1	1.1	S_TWN	F	0:04:32.118-0:04:32.384	IT1	0.111283	8	0.416896
Trial 1	1.1	S_TWN	F	0:04:32.384-0:04:32.650	IT1	0.186943	8	0.700332
Trial 1	1.1	S_TWN	F	0:04:32.650-0:04:32.916	IT1	0.19174	8	0.718303
Trial 1	1.1	S_TWN	F	0:04:32.916-0:04:33.182	IT1	0.0825708	8	0.309331
Trial 1	1.1	S_TWN	F	0:04:33.182-0:04:33.448	IT1	0.229677	8	0.860422
Trial 1	1.1	S_TWN	F	0:04:33.448-0:04:33.714	IT1	0.156812	8	0.587455
Trial 1	1.1	S_TWN	F	0:04:33.714-0:04:33.980	IT1	0.0990709	8	0.371144
Trial 1	1.1	S_TWN	F	0:04:33.980-0:04:34.246	IT1	0.122576	8	0.459199
Trial 1	1.1	S_TWN	F	0:04:34.246-0:04:34.512	IT1	0.137119	8	0.513685
Trial 1	1.1	S_TWN	F	0:04:34.512-0:04:34.778	IT1	0.289175	8	1.08332
Trial 1	1.1	S_TWN	F	0:04:34.778-0:04:35.044	IT1	0.241245	8	0.903767
Trial 1	1.1	S_TWN	F	0:04:35.044-0:04:35.310	IT1	0.292143	8	1.09444
Trial 1	1.1	S_TWN	F	0:04:35.310-0:04:35.576	IT1	0.389784	8	1.46023
Trial 1	1.1	S_TWN	F	0:04:35.576-0:04:35.842	IT1	0.411309	7	1.76099
Trial 1	1.1	S_TWN	F	0:04:35.842-0:04:36.108	IT1	0.71587	8	2.68184
Trial 1	1.1	S_TWN	F	0:04:36.108-0:04:36.374	IT1	0.528961	8	1.98161
Trial 1	1.1	S_TWN	F	0:04:36.374-0:04:36.640	IT1	0.241391	8	0.904309
Trial 1	1.1	S_TWN	F	0:04:36.640-0:04:36.906	IT1	0.357369	8	1.3388
Trial 1	1.1	S_TWN	F	0:04:36.906-0:04:37.172	IT1	0.47572	8	1.78216
Trial 1	1.1	S_TWN	F	0:04:37.172-0:04:37.438	IT1	0.466256	8	1.74672
Trial 1	1.1	S_TWN	F	0:04:37.438-0:04:37.704	IT1	0.677593	8	2.53843
Trial 1	1.1	S_TWN	F	0:04:37.704-0:04:37.970	IT1	0.963086	8	3.60796
Trial 1	1.1	S_TWN	F	0:04:37.970-0:04:38.236	IT1	0.922948	8	3.4576
Trial 1	1.1	S_TWN	F	0:04:38.236-0:04:38.502	IT1	1.02511	8	3.84031
Trial 1	1.1	S_TWN	F	0:04:38.502-0:04:38.768	IT1	0.697631	8	2.61352
Trial 1	1.1	S_TWN	F	0:04:38.768-0:04:39.034	IT1	2.18638	8	8.19071
Trial 1	1.1	S_TWN	F	0:04:39.034-0:04:39.300	IT1	1.11664	8	4.1832
Trial 1	1.1	S_TWN	F	0:04:39.300-0:04:39.566	IT1	0.466831	8	1.74887
Trial 1	1.1	S_TWN	F	0:04:39.566-0:04:39.832	IT1	0.919366	8	3.44417
Trial 1	1.1	S_TWN	F	0:04:39.832-0:04:40.098	IT1	0.605601	8	2.26873
Trial 1	1.1	S_TWN	F	0:04:40.098-0:04:40.364	IT1	0.804427	8	3.01358
Trial 1	1.1	S_TWN	F	0:04:40.364-0:04:40.630	IT1	0.636861	8	2.38584
Trial 1	1.1	S_TWN	F	0:04:40.630-0:04:40.896	IT1	0.305611	8	1.14489
Trial 1	1.1	S_TWN	F	0:04:40.896-0:04:41.162	IT1	0.182692	8	0.684415
Trial 1	1.1	S_TWN	F	0:04:41.162-0:04:41.428	IT1	0.102204	8	0.382884
Trial 1	1.1	S_TWN	F	0:04:41.428-0:04:41.694	IT1	0.25247	8	0.945816
Trial 1	1.1	S_TWN	F	0:04:41.694-0:04:41.960	IT1	0.0976775	8	0.365924
Trial 1	1.1	S_TWN	F	0:04:41.960-0:04:42.226	IT1	0.0672987	8	0.252119
Trial 1	1.1	S_TWN	F	0:04:42.226-0:04:42.492	IT1	0.0500242	8	0.187402
Trial 1	1.1	S_TWN	F	0:04:42.492-0:04:42.758	IT1	0.0290561	8	0.108852
Trial 1	1.1	S_TWN	F	0:04:42.758-0:04:43.024	IT1	0.060205	8	0.225543
Trial 1	1.1	S_TWN	F	0:04:43.024-0:04:43.290	IT1	0.0530317	8	0.19867
Trial 1	1.1	S_TWN	F	0:04:43.290-0:04:43.556	IT1	0.0759036	8	0.284353
Trial 1	1.1	S_TWN	F	0:04:43.556-0:04:43.822	IT1	0.0658382	8	0.246647
Trial 1	1.1	S_TWN	F	0:04:43.822-0:04:44.088	IT1	0.0981376	8	0.367648
Trial 1	1.1	S_TWN	F	0:04:44.088-0:04:44.354	IT1	0.209152	8	0.783538
Trial 1	1.1	S_TWN	F	0:04:44.354-0:04:44.620	IT1	0.179231	8	0.671444
Trial 1	1.1	S_TWN	F	0:04:44.620-0:04:44.886	IT1	0.376359	8	1.40995
Trial 1	1.1	S_TWN	F	0:04:44.886-0:04:45.152	IT1	0.277413	8	1.03926
Trial 1	1.1	S_TWN	F	0:04:45.152-0:04:45.418	IT1	0.148435	7	0.635517
Trial 1	1.1	S_TWN	F	0:04:45.418-0:04:45.684	IT1	0.214747	8	0.804499
Trial 1	1.1	S_TWN	F	0:04:45.684-0:04:45.950	IT1	0.129244	8	0.484179
Trial 1	1.1	S_TWN	F	0:04:45.950-0:04:46.216	IT1	0.0863397	8	0.323449
Trial 1	1.1	S_TWN	F	0:04:46.216-0:04:46.482	IT1	0.122096	8	0.457403
Trial 1	1.1	S_TWN	F	0:04:46.482-0:04:46.748	IT1	0.0820278	8	0.307296
Trial 1	1.1	S_TWN	F	0:04:46.748-0:04:47.014	IT1	0.0552729	8	0.207066
Trial 1	1.1	S_TWN	F	0:04:47.014-0:04:47.280	IT1	0.0538771	8	0.201837
Trial 1	1.1	S_TWN	F	0:04:47.280-0:04:47.546	IT1	0.035938	8	0.134634
Trial 1	1.1	S_TWN	F	0:04:47.546-0:04:47.812	IT1	0.0540111	8	0.202338
Trial 1	1.1	S_TWN	F	0:04:47.812-0:04:48.078	IT1	0.0228519	8	0.085609
Trial 1	1.1	S_TWN	F	0:04:48.078-0:04:48.344	IT1	0.0490194	8	0.183639
Trial 1	1.1	S_TWN	F	0:04:48.344-0:04:48.610	IT1	0.0549441	8	0.205833
Trial 1	1.1	S_TWN	F	0:04:48.610-0:04:48.876	IT1	0.0719471	8	0.269533
Trial 1	1.1	S_TWN	F	0:04:48.876-0:04:49.142	IT1	0.103281	8	0.386917
Trial 1	1.1	S_TWN	F	0:04:49.142-0:04:49.408	IT1	0.122045	8	0.45721
Trial 1	1.1	S_TWN	F	0:04:49.408-0:04:49.674	IT1	0.0997018	8	0.373509
Trial 1	1.1	S_TWN	F	0:04:49.674-0:04:49.940	IT1	0.0851643	8	0.319046
Trial 1	1.1	S_TWN	F	0:04:49.940-0:04:50.206	IT1	0.107383	8	0.402285
Trial 1	1.1	S_TWN	F	0:04:50.206-0:04:50.472	IT1	0.0418701	8	0.156855
Trial 1	1.1	S_TWN	F	0:04:50.472-0:04:50.738	IT1	0.0633226	8	0.237221
Trial 1	1.1	S_TWN	F	0:04:50.738-0:04:51.004	IT1	0.0803669	8	0.301078
Trial 1	1.1	S_TWN	F	0:04:51.004-0:04:51.270	IT1	0.057992	8	0.217251
Trial 1	1.1	S_TWN	F	0:04:51.270-0:04:51.536	IT1	0.0981403	8	0.367657
Trial 1	1.1	S_TWN	F	0:04:51.536-0:04:51.802	IT1	0.0368267	8	0.137961
Trial 1	1.1	S_TWN	F	0:04:51.802-0:04:52.068	IT1	0.117136	8	0.438819
Trial 1	1.1	S_TWN	F	0:04:52.068-0:04:52.334	IT1	0.0285184	8	0.106837
Trial 1	1.1	S_TWN	F	0:04:52.334-0:04:52.600	IT1	0.0864904	8	0.324013
Trial 1	1.1	S_TWN	F	0:04:52.600-0:04:52.866	IT1	0.0668984	8	0.250619
Trial 1	1.1	S_TWN	F	0:04:52.866-0:04:53.132	IT1	0.0681798	8	0.255419
Trial 1	1.1	S_TWN	F	0:04:53.132-0:04:53.398	IT1	0.0679128	8	0.254417
Trial 1	1.1	S_TWN	F	0:04:53.398-0:04:53.664	IT1	0.033309	8	0.124784
Trial 1	1.1	S_TWN	F	0:04:53.664-0:04:53.930	IT1	0.0759714	8	0.284607
Trial 1	1.1	S_TWN	F	0:04:53.930-0:04:54.196	IT1	0.0739533	8	0.277049
Trial 1	1.1	S_TWN	F	0:04:54.196-0:04:54.462	IT1	0.0908278	8	0.340262
Trial 1	1.1	S_TWN	F	0:04:54.462-0:04:54.728	IT1	0.0278299	7	0.119153
Trial 1	1.1	S_TWN	F	0:04:54.728-0:04:54.994	IT1	0.100061	8	0.37485
Trial 1	1.1	S_TWN	F	0:04:54.994-0:04:55.260	IT1	0.0568901	8	0.213125
Trial 1	1.1	S_TWN	F	0:04:55.260-0:04:55.526	IT1	0.0653925	8	0.244976
Trial 1	1.1	S_TWN	F	0:04:55.526-0:04:55.792	IT1	0.0474628	8	0.177807
Trial 1	1.1	S_TWN	F	0:04:55.792-0:04:56.058	IT1	0.0497427	8	0.186348
Trial 1	1.1	S_TWN	F	0:04:56.058-0:04:56.324	IT1	0.0707443	8	0.265027
Trial 1	1.1	S_TWN	F	0:04:56.324-0:04:56.590	IT1	0.0123251	8	0.046173
Trial 1	1.1	S_TWN	F	0:04:56.590-0:04:56.856	IT1	0.040883	8	0.153158
Trial 1	1.1	S_TWN	F	0:04:56.856-0:04:57.122	IT1	0.0158568	8	0.0594036
Trial 1	1.1	S_TWN	F	0:04:57.122-0:04:57.388	IT1	0.0398483	8	0.149282
Trial 1	1.1	S_TWN	F	0:04:57.388-0:04:57.654	IT1	0.017138	8	0.0642032
Trial 1	1.1	S_TWN	F	0:04:57.654-0:04:57.920	IT1	0.0721717	8	0.270372
Trial 1	1.1	S_TWN	F	0:04:57.920-0:04:58.186	IT1	0.0914769	8	0.342695
Trial 1	1.1	S_TWN	F	0:04:58.186-0:04:58.452	IT1	0.0267132	8	0.100075
Trial 1	1.1	S_TWN	F	0:04:58.452-0:04:58.718	IT1	0.0994178	8	0.372443
Trial 1	1.1	S_TWN	F	0:04:58.718-0:04:58.984	IT1	0.031605	8	0.1184
Trial 1	1.1	S_TWN	F	0:04:58.984-0:04:59.250	IT1	0.083503	8	0.312826
Trial 1	1.1	S_TWN	F	0:04:59.250-0:04:59.516	IT1	0.0416373	8	0.155983
Trial 1	1.1	S_TWN	F	0:04:59.516-0:04:59.782	IT1	0.0514825	8	0.192866
Trial 1	1.1	S_TWN	F	0:04:59.782-0:05:00.048	IT1	0.0379983	8	0.142351
Trial 1	1.1	S_TWN	F	0:05:00.048-0:05:00.314	IT1	0.0518593	8	0.194277
Trial 1	1.1	S_TWN	F	0:05:00.314-0:05:00.580	IT1	0.0235723	8	0.088309
Trial 1	1.1	S_TWN	F	0:05:00.580-0:05:00.846	IT1	0.0266613	8	0.0998801
Trial 1	1.1	S_TWN	F	0:05:00.846-0:05:01.112	IT1	0.107135	8	0.401352
Trial 1	1.1	S_TWN	F	0:05:01.112-0:05:01.378	IT1	0.0805415	8	0.30173
Trial 1	1.1	S_TWN	F	0:05:01.378-0:05:01.644	IT1	0.06517	8	0.244142
Trial 1	1.1	S_TWN	F	0:05:01.644-0:05:01.910	IT1	0.0396841	8	0.148668
Trial 1	1.1	S_TWN	F	0:05:01.910-0:05:02.176	IT1	0.0340526	8	0.12757
Trial 1	1.1	S_TWN	F	0:05:02.176-0:05:02.442	IT1	0.0345156	8	0.129305
Trial 1	1.1	S_TWN	F	0:05:02.442-0:05:02.708	IT1	0.0459177	8	0.172018
Trial 1	1.1	S_TWN	F	0:05:02.708-0:05:02.974	IT1	0.0547167	8	0.204981
Trial 1	1.1	S_TWN	F	0:05:02.974-0:05:03.240	IT1	0.0326918	8	0.122472
Trial 1	1.1	S_TWN	F	0:05:03.240-0:05:03.506	IT1	0.0715869	8	0.268181
Trial 1	1.1	S_TWN	F	0:05:03.506-0:05:03.772	IT1	0.0555781	8	0.208208
Trial 1	1.1	S_TWN	F	0:05:03.772-0:05:04.038	IT1	0.0373745	8	0.140014
Trial 1	1.1	S_TWN	F	0:05:04.038-0:05:04.304	IT1	0.0493379	7	0.211238
Trial 1	1.1	S_TWN	F	0:05:04.304-0:05:04.570	IT1	0.054154	8	0.202874
Trial 1	1.1	S_TWN	F	0:05:04.570-0:05:04.836	IT1	0.0653678	8	0.244883
Trial 1	1.1	S_TWN	F	0:05:04.836-0:05:05.102	IT1	0.0251518	8	0.0942244
Trial 1	1.1	S_TWN	F	0:05:05.102-0:05:05.368	IT1	0.136741	8	0.512269
Trial 1	1.1	S_TWN	F	0:05:05.368-0:05:05.634	IT1	0.0305349	8	0.114391
Trial 1	1.1	S_TWN	F	0:05:05.634-0:05:05.900	IT1	0.0833032	8	0.312074
Trial 1	1.1	S_TWN	F	0:05:05.900-0:05:06.166	IT1	0.0550243	8	0.206135
Trial 1	1.1	S_TWN	F	0:05:06.166-0:05:06.432	IT1	0.0662416	8	0.248157
Trial 1	1.1	S_TWN	F	0:05:06.432-0:05:06.698	IT1	0.075015	8	0.281027
Trial 1	1.1	S_TWN	F	0:05:06.698-0:05:06.964	IT1	0.0604703	8	0.226536
Trial 1	1.1	S_TWN	F	0:05:06.964-0:05:07.230	IT1	0.0381768	8	0.14302
Trial 1	1.1	S_TWN	F	0:05:07.230-0:05:07.496	IT1	0.0407447	8	0.152641
Trial 1	1.1	S_TWN	F	0:05:07.496-0:05:07.762	IT1	0.106417	8	0.398663
Trial 1	1.1	S_TWN	F	0:05:07.762-0:05:08.028	IT1	0.07523	8	0.281831
Trial 1	1.1	S_TWN	F	0:05:08.028-0:05:08.294	IT1	0.0685886	8	0.256949
Trial 1	1.1	S_TWN	F	0:05:08.294-0:05:08.560	IT1	0.0499907	8	0.187278
Trial 1	1.1	S_TWN	F	0:05:08.560-0:05:08.826	IT1	0.0523145	8	0.195983
Trial 1	1.1	S_TWN	F	0:05:08.826-0:05:09.092	IT1	0.0732112	8	0.274267
Trial 1	1.1	S_TWN	F	0:05:09.092-0:05:09.358	IT1	0.0966912	8	0.36223
Trial 1	1.1	S_TWN	F	0:05:09.358-0:05:09.624	IT1	0.0569537	8	0.213362
Trial 1	1.1	S_TWN	F	0:05:09.624-0:05:09.890	IT1	0.120853	8	0.452745
Trial 1	1.1	S_TWN	F	0:05:09.890-0:05:10.156	IT1	0.0970747	8	0.363664
Trial 1	1.1	S_TWN	F	0:05:10.156-0:05:10.422	IT1	0.114409	8	0.428602
Trial 1	1.1	S_TWN	F	0:05:10.422-0:05:10.688	IT1	0.0856801	8	0.320979
Trial 1	1.1	S_TWN	F	0:05:10.688-0:05:10.954	IT1	0.234443	8	0.878286
Trial 1	1.1	S_TWN	F	0:05:10.954-0:05:11.220	IT1	0.190491	8	0.713631
Trial 1	1.1	S_TWN	F	0:05:11.220-0:05:11.486	IT1	0.299813	8	1.12317
Trial 1	1.1	S_TWN	F	0:05:11.486-0:05:11.752	IT1	0.24994	8	0.936344
Trial 1	1.1	S_TWN	F	0:05:11.752-0:05:12.018	IT1	0.136824	8	0.512576
Trial 1	1.1	S_TWN	F	0:05:12.018-0:05:12.284	IT1	0.134365	8	0.503365
Trial 1	1.1	S_TWN	F	0:05:12.284-0:05:12.550	IT1	0.0425887	8	0.159548
Trial 1	1.1	S_TWN	F	0:05:12.550-0:05:12.816	IT1	0.0759803	8	0.28464
Trial 1	1.1	S_TWN	F	0:05:12.816-0:05:13.082	IT1	0.408158	8	1.52906
Trial 1	1.1	S_TWN	F	0:05:13.082-0:05:13.348	IT1	0.222652	8	0.834117
Trial 1	1.1	S_TWN	F	0:05:13.348-0:05:13.614	IT1	0.124588	8	0.466737
Trial 1	1.1	S_TWN	F	0:05:13.614-0:05:13.880	IT1	0.0461463	7	0.197571
Trial 1	1.1	S_TWN	F	0:05:13.880-0:05:14.146	IT1	0.0821279	8	0.307675
Trial 1	1.1	S_TWN	F	0:05:14.146-0:05:14.412	IT1	0.353487	8	1.32425
Trial 1	1.1	S_TWN	F	0:05:14.412-0:05:14.678	IT1	0.187655	8	0.703003
Trial 1	1.1	S_TWN	F	0:05:14.678-0:05:14.944	IT1	0.426231	8	1.59677
Trial 1	1.1	S_TWN	F	0:05:14.944-0:05:15.210	IT1	0.641685	8	2.40391
Trial 1	1.1	S_TWN	F	0:05:15.210-0:05:15.476	IT1	0.652409	8	2.44409
Trial 1	1.1	S_TWN	F	0:05:15.476-0:05:15.742	IT1	0.403139	8	1.51026
Trial 1	1.1	S_TWN	F	0:05:15.742-0:05:16.008	IT1	0.95107	8	3.56293
Trial 1	1.1	S_TWN	F	0:05:16.008-0:05:16.274	IT1	0.36695	8	1.37469
Trial 1	1.1	S_TWN	F	0:05:16.274-0:05:16.540	IT1	0.370287	8	1.38718
Trial 1	1.1	S_TWN	F	0:05:16.540-0:05:16.806	IT1	0.846485	8	3.17115
Trial 1	1.1	S_TWN	F	0:05:16.806-0:05:17.072	IT1	0.454979	8	1.70446
Trial 1	1.1	S_TWN	F	0:05:17.072-0:05:17.338	IT1	0.149223	8	0.559027
Trial 1	1.1	S_TWN	F	0:05:17.338-0:05:17.604	IT1	0.142268	8	0.532974
Trial 1	1.1	S_TWN	F	0:05:17.604-0:05:17.870	IT1	0.134116	8	0.502431
Trial 1	1.1	S_TWN	F	0:05:17.870-0:05:18.136	IT1	0.118482	8	0.443863
Trial 1	1.1	S_TWN	F	0:05:18.136-0:05:18.402	IT1	0.114562	8	0.429177
Trial 1	1.1	S_TWN	F	0:05:18.402-0:05:18.668	IT1	0.145726	8	0.54593
Trial 1	1.1	S_TWN	F	0:05:18.668-0:05:18.934	IT1	0.101525	8	0.380339
Trial 1	1.1	S_TWN	F	0:05:18.934-0:05:19.200	IT1	0.110616	8	0.414394
Trial 1	1.1	S_TWN	F	0:05:19.200-0:05:19.466	IT1	0.0734587	8	0.275194
Trial 1	1.1	S_TWN	F	0:05:19.466-0:05:19.732	IT1	0.154353	8	0.578244
Trial 1	1.1	S_TWN	F	0:05:19.732-0:05:19.998	IT1	0.0762625	8	0.285698
Trial 1	1.1	S_TWN	F	0:05:19.998-0:05:20.264	IT1	0.148195	8	0.555176
Trial 1	1.1	S_TWN	F	0:05:20.264-0:05:20.530	IT1	0.363258	8	1.36085
Trial 1	1.1	S_TWN	F	0:05:20.530-0:05:20.796	IT1	0.537436	8	2.01338
Trial 1	1.1	S_TWN	F	0:05:20.796-0:05:21.062	IT1	0.292148	8	1.09446
Trial 1	1.1	S_TWN	F	0:05:21.062-0:05:21.328	IT1	0.486538	8	1.82269
Trial 1	1.1	S_TWN	F	0:05:21.328-0:05:21.594	IT1	0.189597	8	0.710281
Trial 1	1.1	S_TWN	F	0:05:21.594-0:05:21.860	IT1	0.110448	8	0.413764
Trial 1	1.1	S_TWN	F	0:05:21.860-0:05:22.126	IT1	0.189904	8	0.711427
Trial 1	1.1	S_TWN	F	0:05:22.126-0:05:22.392	IT1	0.105449	8	0.395039
Trial 1	1.1	S_TWN	F	0:05:22.392-0:05:22.658	IT1	0.136813	8	0.512533
Trial 1	1.1	S_TWN	F	0:05:22.658-0:05:22.924	IT1	0.24904	8	0.932963
Trial 1	1.1	S_TWN	F	0:05:22.924-0:05:23.190	IT1	0.50565	8	1.89429
Trial 1	1.1	S_TWN	F	0:05:23.190-0:05:23.456	IT1	0.295041	7	1.2632
Trial 1	1.1	S_TWN	F	0:05:23.456-0:05:23.722	IT1	0.291355	8	1.0915
Trial 1	1.1	S_TWN	F	0:05:23.722-0:05:23.988	IT1	0.283865	8	1.06343
Trial 1	1.1	S_TWN	F	0:05:23.988-0:05:24.254	IT1	0.160762	8	0.602254
Trial 1	1.1	S_TWN	F	0:05:24.254-0:05:24.520	IT1	0.252092	8	0.944394
Trial 1	1.1	S_TWN	F	0:05:24.520-0:05:24.786	IT1	0.0724316	8	0.271346
Trial 1	1.1	S_TWN	F	0:05:24.786-0:05:25.052	IT1	0.131943	8	0.494288
Trial 1	1.1	S_TWN	F	0:05:25.052-0:05:25.318	IT1	0.149035	8	0.558324
Trial 1	1.1	S_TWN	F	0:05:25.318-0:05:25.584	IT1	0.0690648	8	0.258734
Trial 1	1.1	S_TWN	F	0:05:25.584-0:05:25.850	IT1	0.133112	8	0.498668
Trial 1	1.1	S_TWN	F	0:05:25.850-0:05:26.116	IT1	0.126503	8	0.473911
Trial 1	1.1	S_TWN	F	0:05:26.116-0:05:26.382	IT1	0.38459	8	1.44077
Trial 1	1.1	S_TWN	F	0:05:26.382-0:05:26.648	IT1	0.743553	8	2.78553
Trial 1	1.1	S_TWN	F	0:05:26.648-0:05:26.914	IT1	0.294384	8	1.10284
Trial 1	1.1	S_TWN	F	0:05:26.914-0:05:27.180	IT1	0.0994836	8	0.372689
Trial 1	1.1	S_TWN	F	0:05:27.180-0:05:27.446	IT1	0.129547	8	0.485318
Trial 1	1.1	S_TWN	F	0:05:27.446-0:05:27.712	IT1	0.124374	8	0.465934
Trial 1	1.1	S_TWN	F	0:05:27.712-0:05:27.978	IT1	0.169678	8	0.635656
Trial 1	1.1	S_TWN	F	0:05:27.978-0:05:28.244	IT1	0.221473	8	0.829687
Trial 1	1.1	S_TWN	F	0:05:28.244-0:05:28.510	IT1	0.0588606	8	0.220507
Trial 1	1.1	S_TWN	F	0:05:28.510-0:05:28.776	IT1	0.137944	8	0.516769
Trial 1	1.1	S_TWN	F	0:05:28.776-0:05:29.042	IT1	0.0650258	8	0.243604
Trial 1	1.1	S_TWN	F	0:05:29.042-0:05:29.308	IT1	0.1584	8	0.593405
Trial 1	1.1	S_TWN	F	0:05:29.308-0:05:29.574	IT1	0.183298	8	0.686686
Trial 1	1.1	S_TWN	F	0:05:29.574-0:05:29.840	IT1	0.185128	8	0.693535
Trial 1	1.1	S_TWN	F	0:05:29.840-0:05:30.106	IT1	0.106558	8	0.399194
Trial 1	1.1	S_TWN	F	0:05:30.106-0:05:30.372	IT1	1.24569	8	4.66667
Trial 1	1.1	S_TWN	F	0:05:30.372-0:05:30.638	IT1	0.657185	8	2.46198
Trial 1	1.1	S_TWN	F	0:05:30.638-0:05:30.904	IT1	0.143577	8	0.537879
Trial 1	1.1	S_TWN	F	0:05:30.904-0:05:31.170	IT1	0.0862026	8	0.322936
Trial 1	1.1	S_TWN	F	0:05:31.170-0:05:31.436	IT1	0.331603	8	1.24226
Trial 1	1.1	S_TWN	F	0:05:31.436-0:05:31.702	IT1	0.284705	8	1.06658
Trial 1	1.1	S_TWN	F	0:05:31.702-0:05:31.968	IT1	0.111249	8	0.416764
Trial 1	1.1	S_TWN	F	0:05:31.968-0:05:32.234	IT1	0.0663703	8	0.24864
Trial 1	1.1	S_TWN	F	0:05:32.234-0:05:32.500	IT1	0.0506485	8	0.189742
Trial 1	1.1	S_TWN	F	0:05:32.500-0:05:32.766	IT1	0.0436659	7	0.186952
Trial 1	1.1	S_TWN	F	0:05:32.766-0:05:33.032	IT1	0.0509602	8	0.190909
Trial 1	1.1	S_TWN	F	0:05:33.032-0:05:33.298	IT1	0.0284734	8	0.106669
Trial 1	1.1	S_TWN	F	0:05:33.298-0:05:33.564	IT1	0.0661248	8	0.247719
Trial 1	1.1	S_TWN	F	0:05:33.564-0:05:33.830	IT1	0.036975	8	0.138518
Trial 1	1.1	S_TWN	F	0:05:33.830-0:05:34.096	IT1	0.110718	8	0.414777
Trial 1	1.1	S_TWN	F	0:05:34.096-0:05:34.362	IT1	0.0616196	8	0.230843
Trial 1	1.1	S_TWN	F	0:05:34.362-0:05:34.628	IT1	0.086206	8	0.322949
Trial 1	1.1	S_TWN	F	0:05:34.628-0:05:34.894	IT1	0.0541398	8	0.202822
Trial 1	1.1	S_TWN	F	0:05:34.894-0:05:35.160	IT1	0.0446689	8	0.167342
Trial 1	1.1	S_TWN	F	0:05:35.160-0:05:35.426	IT1	0.058507	8	0.219181
Trial 1	1.1	S_TWN	F	0:05:35.426-0:05:35.692	IT1	0.0365583	8	0.136957
Trial 1	1.1	S_TWN	F	0:05:35.692-0:05:35.958	IT1	0.0729613	8	0.273331
Trial 1	1.1	S_TWN	F	0:05:35.958-0:05:36.224	IT1	0.0670386	8	0.251143
Trial 1	1.1	S_TWN	F	0:05:36.224-0:05:36.490	IT1	0.114851	8	0.430261
Trial 1	1.1	S_TWN	F	0:05:36.490-0:05:36.756	IT1	0.108785	8	0.407533
Trial 1	1.1	S_TWN	F	0:05:36.756-0:05:37.022	IT1	0.133117	8	0.498689
Trial 1	1.1	S_TWN	F	0:05:37.022-0:05:37.288	IT1	0.0403915	8	0.151318
Trial 1	1.1	S_TWN	F	0:05:37.288-0:05:37.554	IT1	0.0879305	8	0.329408
Trial 1	1.1	S_TWN	F	0:05:37.554-0:05:37.820	IT1	0.0983982	8	0.368624
Trial 1	1.1	S_TWN	F	0:05:37.820-0:05:38.086	IT1	0.0439332	8	0.164584
Trial 1	1.1	S_TWN	F	0:05:38.086-0:05:38.352	IT1	0.0770297	8	0.288574
Trial 1	1.1	S_TWN	F	0:05:38.352-0:05:38.618	IT1	0.199438	8	0.747146
Trial 1	1.1	S_TWN	F	0:05:38.618-0:05:38.884	IT1	0.200618	8	0.751563
Trial 1	1.1	S_TWN	F	0:05:38.884-0:05:39.150	IT1	0.139478	8	0.522518
Trial 1	1.1	S_TWN	F	0:05:39.150-0:05:39.416	IT1	0.0799229	8	0.29941
Trial 1	1.1	S_TWN	F	0:05:39.416-0:05:39.682	IT1	0.0361153	8	0.135297
Trial 1	1.1	S_TWN	F	0:05:39.682-0:05:39.948	IT1	0.0542551	8	0.203254
Trial 1	1.1	S_TWN	F	0:05:39.948-0:05:40.214	IT1	0.0684608	8	0.256471
Trial 1	1.1	S_TWN	F	0:05:40.214-0:05:40.480	IT1	0.0447279	8	0.167562
Trial 1	1.1	S_TWN	F	0:05:40.480-0:05:40.746	IT1	0.0555438	8	0.20808
Trial 1	1.1	S_TWN	F	0:05:40.746-0:05:41.012	IT1	0.0347389	8	0.13014
Trial 1	1.1	S_TWN	F	0:05:41.012-0:05:41.278	IT1	0.0816767	8	0.305982
Trial 1	1.1	S_TWN	F	0:05:41.278-0:05:41.544	IT1	0.0252597	8	0.094629
Trial 1	1.1	S_TWN	F	0:05:41.544-0:05:41.810	IT1	0.0265142	8	0.0993294
Trial 1	1.1	S_TWN	F	0:05:41.810-0:05:42.076	IT1	0.0234561	8	0.087872
Trial 1	1.1	S_TWN	F	0:05:42.076-0:05:42.342	IT1	0.0154321	7	0.0660712
Trial 1	1.1	S_TWN	F	0:05:42.342-0:05:42.608	IT1	0.0583423	8	0.218565
Trial 1	1.1	S_TWN	F	0:05:42.608-0:05:42.874	IT1	0.0254954	8	0.0955119
Trial 1	1.1	S_TWN	F	0:05:42.874-0:05:43.140	IT1	0.0564969	8	0.21165
Trial 1	1.1	S_TWN	F	0:05:43.140-0:05:43.406	IT1	0.0294006	8	0.110142
Trial 1	1.1	S_TWN	F	0:05:43.406-0:05:43.672	IT1	0.0525286	8	0.196786
Trial 1	1.1	S_TWN	F	0:05:43.672-0:05:43.938	IT1	0.0266212	8	0.0997293
Trial 1	1.1	S_TWN	F	0:05:43.938-0:05:44.204	IT1	0.095371	8	0.357283
Trial 1	1.1	S_TWN	F	0:05:44.204-0:05:44.470	IT1	0.0493003	8	0.184691
Trial 1	1.1	S_TWN	F	0:05:44.470-0:05:44.736	IT1	0.0267387	8	0.100171
Trial 1	1.1	S_TWN	F	0:05:44.736-0:05:45.002	IT1	0.0763467	8	0.286015
Trial 1	1.1	S_TWN	F	0:05:45.002-0:05:45.268	IT1	0.0496517	8	0.186009
Trial 1	1.1	S_TWN	F	0:05:45.268-0:05:45.534	IT1	0.059021	8	0.221107
Trial 1	1.1	S_TWN	F	0:05:45.534-0:05:45.800	IT1	0.052298	8	0.195923
Trial 1	1.1	S_TWN	F	0:05:45.800-0:05:46.066	IT1	0.0541576	8	0.202888
Trial 1	1.1	S_TWN	F	0:05:46.066-0:05:46.332	IT1	0.0308254	8	0.115479
Trial 1	1.1	S_TWN	F	0:05:46.332-0:05:46.598	IT1	0.0734449	8	0.275146
Trial 1	1.1	S_TWN	F	0:05:46.598-0:05:46.864	IT1	0.0488025	8	0.182825
Trial 1	1.1	S_TWN	F	0:05:46.864-0:05:47.130	IT1	0.033302	8	0.124758
Trial 1	1.1	S_TWN	F	0:05:47.130-0:05:47.396	IT1	0.0404668	8	0.151599
Trial 1	1.1	S_TWN	F	0:05:47.396-0:05:47.662	IT1	0.0200682	8	0.0751803
Trial 1	1.1	S_TWN	F	0:05:47.662-0:05:47.928	IT1	0.0622991	8	0.233388
Trial 1	1.1	S_TWN	F	0:05:47.928-0:05:48.194	IT1	0.0256617	8	0.0961346
Trial 1	1.1	S_TWN	F	0:05:48.194-0:05:48.460	IT1	0.049906	8	0.186961
Trial 1	1.1	S_TWN	F	0:05:48.460-0:05:48.726	IT1	0.0447872	8	0.167784
Trial 1	1.1	S_TWN	F	0:05:48.726-0:05:48.992	IT1	0.0731047	8	0.273869
Trial 1	1.1	S_TWN	F	0:05:48.992-0:05:49.258	IT1	0.0417413	8	0.156372
Trial 1	1.1	S_TWN	F	0:05:49.258-0:05:49.524	IT1	0.0367814	8	0.137792
Trial 1	1.1	S_TWN	F	0:05:49.524-0:05:49.790	IT1	0.0233678	8	0.0875414
Trial 1	1.1	S_TWN	F	0:05:49.790-0:05:50.056	IT1	0.00896755	8	0.0335949
Trial 1	1.1	S_TWN	F	0:05:50.056-0:05:50.322	CS2a	0.0613065	8	0.22967
Trial 1	1.1	S_TWN	F	0:05:50.322-0:05:50.588	CS2a	0.047591	8	0.178288
Trial 1	1.1	S_TWN	F	0:05:50.588-0:05:50.854	CS2a	0.0575959	8	0.215767
Trial 1	1.1	S_TWN	F	0:05:50.854-0:05:51.120	CS2a	0.0347361	8	0.13013
Trial 1	1.1	S_TWN	F	0:05:51.120-0:05:51.386	CS2a	0.0857624	8	0.321286
Trial 1	1.1	S_TWN	F	0:05:51.386-0:05:51.652	CS2a	0.0403589	8	0.151193
Trial 1	1.1	S_TWN	F	0:05:51.652-0:05:51.918	CS2a	0.0260857	7	0.111684
Trial 1	1.1	S_TWN	F	0:05:51.918-0:05:52.184	CS2a	0.074446	8	0.278893
Trial 1	1.1	S_TWN	F	0:05:52.184-0:05:52.450	CS2a	0.0825814	8	0.309369
Trial 1	1.1	S_TWN	F	0:05:52.450-0:05:52.716	CS2a	0.0853866	8	0.319879
Trial 1	1.1	S_TWN	F	0:05:52.716-0:05:52.982	CS2a	0.0226493	8	0.0848501
Trial 1	1.1	S_TWN	F	0:05:52.982-0:05:53.248	CS2a	0.0724911	8	0.271571
Trial 1	1.1	S_TWN	F	0:05:53.248-0:05:53.514	CS2a	0.0413515	8	0.154914
Trial 1	1.1	S_TWN	F	0:05:53.514-0:05:53.780	CS2a	0.0260955	8	0.0977598
Trial 1	1.1	S_TWN	F	0:05:53.780-0:05:54.046	CS2a	0.0399317	8	0.149593
Trial 1	1.1	S_TWN	F	0:05:54.046-0:05:54.312	CS2a	0.048625	8	0.182162
Trial 1	1.1	S_TWN	F	0:05:54.312-0:05:54.578	CS2a	0.0874864	8	0.327746
Trial 1	1.1	S_TWN	F	0:05:54.578-0:05:54.844	CS2a	0.0752068	8	0.281743
Trial 1	1.1	S_TWN	F	0:05:54.844-0:05:55.110	CS2a	0.0819465	8	0.30699
Trial 1	1.1	S_TWN	F	0:05:55.110-0:05:55.376	CS2a	0.0407056	8	0.152493
Trial 1	1.1	S_TWN	F	0:05:55.376-0:05:55.642	CS2a	0.137011	8	0.513278
Trial 1	1.1	S_TWN	F	0:05:55.642-0:05:55.908	CS2a	0.0625684	8	0.234396
Trial 1	1.1	S_TWN	F	0:05:55.908-0:05:56.174	CS2a	0.0436547	8	0.163542
Trial 1	1.1	S_TWN	F	0:05:56.174-0:05:56.440	CS2a	0.0833675	8	0.312314
Trial 1	1.1	S_TWN	F	0:05:56.440-0:05:56.706	CS2a	0.0869308	8	0.325663
Trial 1	1.1	S_TWN	F	0:05:56.706-0:05:56.972	CS2a	0.0946103	8	0.354437
Trial 1	1.1	S_TWN	F	0:05:56.972-0:05:57.238	CS2a	0.110761	8	0.41494
Trial 1	1.1	S_TWN	F	0:05:57.238-0:05:57.504	CS2a	0.258634	8	0.968911
Trial 1	1.1	S_TWN	F	0:05:57.504-0:05:57.770	CS2a	0.213835	8	0.801078
Trial 1	1.1	S_TWN	F	0:05:57.770-0:05:58.036	CS2a	0.146486	8	0.548774
Trial 1	1.1	S_TWN	F	0:05:58.036-0:05:58.302	CS2a	0.156231	8	0.585281
Trial 1	1.1	S_TWN	F	0:05:58.302-0:05:58.568	CS2a	0.0938915	8	0.35174
Trial 1	1.1	S_TWN	F	0:05:58.568-0:05:58.834	CS2a	0.0481768	8	0.180483
Trial 1	1.1	S_TWN	F	0:05:58.834-0:05:59.100	CS2a	0.0852027	8	0.319189
Trial 1	1.1	S_TWN	F	0:05:59.100-0:05:59.366	CS2a	0.0506886	8	0.189892
Trial 1	1.1	S_TWN	F	0:05:59.366-0:05:59.632	CS2a	0.0289414	8	0.108422
Trial 1	1.1	S_TWN	F	0:05:59.632-0:05:59.898	CS2a	0.122424	8	0.458632
Trial 1	1.1	S_TWN	F	0:05:59.898-0:06:00.164	CS2a	0.082464	8	0.308932
Trial 1	1.1	S_TWN	F	0:06:00.164-0:06:00.430	CS2b	0.0850106	8	0.31847
Trial 1	1.1	S_TWN	F	0:06:00.430-0:06:00.696	CS2b	0.0741036	8	0.27761
Trial 1	1.1	S_TWN	F	0:06:00.696-0:06:00.962	CS2b	0.0431483	8	0.161644
Trial 1	1.1	S_TWN	F	0:06:00.962-0:06:01.228	CS2b	0.0420188	8	0.157412
Trial 1	1.1	S_TWN	F	0:06:01.228-0:06:01.494	CS2b	0.0392724	7	0.168142
Trial 1	1.1	S_TWN	F	0:06:01.494-0:06:01.760	CS2b	0.125454	8	0.469979
Trial 1	1.1	S_TWN	F	0:06:01.760-0:06:02.026	CS2b	0.0385652	8	0.144475
Trial 1	1.1	S_TWN	F	0:06:02.026-0:06:02.292	CS2b	0.0906647	8	0.339653
Trial 1	1.1	S_TWN	F	0:06:02.292-0:06:02.558	CS2b	0.0714051	8	0.267502
Trial 1	1.1	S_TWN	F	0:06:02.558-0:06:02.824	CS2b	0.0674126	8	0.252545
Trial 1	1.1	S_TWN	F	0:06:02.824-0:06:03.090	CS2b	0.0725878	8	0.271933
Trial 1	1.1	S_TWN	F	0:06:03.090-0:06:03.356	CS2b	0.0545471	8	0.204347
Trial 1	1.1	S_TWN	F	0:06:03.356-0:06:03.622	CS2b	0.0830381	8	0.311081
Trial 1	1.1	S_TWN	F	0:06:03.622-0:06:03.888	CS2b	0.0482044	8	0.180585
Trial 1	1.1	S_TWN	F	0:06:03.888-0:06:04.154	CS2b	0.0859286	8	0.321908
Trial 1	1.1	S_TWN	F	0:06:04.154-0:06:04.420	CS2b	0.0746126	8	0.279517
Trial 1	1.1	S_TWN	F	0:06:04.420-0:06:04.686	CS2b	0.174673	8	0.654364
Trial 1	1.1	S_TWN	F	0:06:04.686-0:06:04.952	CS2b	0.0802394	8	0.300597
Trial 1	1.1	S_TWN	F	0:06:04.952-0:06:05.218	CS2b	0.072145	8	0.270273
Trial 1	1.1	S_TWN	F	0:06:05.218-0:06:05.484	CS2b	0.051412	8	0.192602
Trial 1	1.1	S_TWN	F	0:06:05.484-0:06:05.750	CS2b	0.0298274	8	0.111741
Trial 1	1.1	S_TWN	F	0:06:05.750-0:06:06.016	CS2b	0.0538289	8	0.201656
Trial 1	1.1	S_TWN	F	0:06:06.016-0:06:06.282	CS2b	0.0806548	8	0.302152
Trial 1	1.1	S_TWN	F	0:06:06.282-0:06:06.548	CS2b	0.0656305	8	0.245867
Trial 1	1.1	S_TWN	F	0:06:06.548-0:06:06.814	CS2b	0.093884	8	0.351714
Trial 1	1.1	S_TWN	F	0:06:06.814-0:06:07.080	CS2b	0.197073	8	0.73829
Trial 1	1.1	S_TWN	F	0:06:07.080-0:06:07.346	CS2b	0.20695	8	0.775284
Trial 1	1.1	S_TWN	F	0:06:07.346-0:06:07.612	CS2b	0.1485	8	0.556321
Trial 1	1.1	S_TWN	F	0:06:07.612-0:06:07.878	CS2b	0.237682	8	0.890416
Trial 1	1.1	S_TWN	F	0:06:07.878-0:06:08.144	CS2b	0.325642	8	1.21994
Trial 1	1.1	S_TWN	F	0:06:08.144-0:06:08.410	CS2b	0.34681	8	1.29924
Trial 1	1.1	S_TWN	F	0:06:08.410-0:06:08.676	CS2b	0.161238	8	0.604038
Trial 1	1.1	S_TWN	F	0:06:08.676-0:06:08.942	CS2b	0.0921162	8	0.345089
Trial 1	1.1	S_TWN	F	0:06:08.942-0:06:09.208	CS2b	0.0508051	8	0.190328
Trial 1	1.1	S_TWN	F	0:06:09.208-0:06:09.474	CS2b	0.0696393	8	0.260886
Trial 1	1.1	S_TWN	F	0:06:09.474-0:06:09.740	CS2b	0.0418919	8	0.156938
Trial 1	1.1	S_TWN	F	0:06:09.740-0:06:10.006	CS2b	0.0681494	8	0.255303
Trial 1	1.1	S_TWN	F	0:06:10.006-0:06:10.272	IT2	2.53534	8	9.49803
Trial 1	1.1	S_TWN	F	0:06:10.272-0:06:10.538	IT2	7.32134	8	27.4275
Trial 1	1.1	S_TWN	F	0:06:10.538-0:06:10.804	IT2	7.54579	7	32.3067
Trial 1	1.1	S_TWN	F	0:06:10.804-0:06:11.070	IT2	3.77568	8	14.1447
Trial 1	1.1	S_TWN	F	0:06:11.070-0:06:11.336	IT2	7.01962	8	26.2973
Trial 1	1.1	S_TWN	F	0:06:11.336-0:06:11.602	IT2	8.85203	8	33.1618
Trial 1	1.1	S_TWN	F	0:06:11.602-0:06:11.868	IT2	4.70481	8	17.6254
Trial 1	1.1	S_TWN	F	0:06:11.868-0:06:12.134	IT2	1.25689	8	4.70861
Trial 1	1.1	S_TWN	F	0:06:12.134-0:06:12.400	IT2	0.2032	8	0.761235
Trial 1	1.1	S_TWN	F	0:06:12.400-0:06:12.666	IT2	0.102645	8	0.384535
Trial 1	1.1	S_TWN	F	0:06:12.666-0:06:12.932	IT2	0.0654002	8	0.245004
Trial 1	1.1	S_TWN	F	0:06:12.932-0:06:13.198	IT2	0.203526	8	0.762462
Trial 1	1.1	S_TWN	F	0:06:13.198-0:06:13.464	IT2	0.218153	8	0.817259
Trial 1	1.1	S_TWN	F	0:06:13.464-0:06:13.730	IT2	0.165029	8	0.618239
Trial 1	1.1	S_TWN	F	0:06:13.730-0:06:13.996	IT2	0.123674	8	0.463317
Trial 1	1.1	S_TWN	F	0:06:13.996-0:06:14.262	IT2	0.208861	8	0.782442
Trial 1	1.1	S_TWN	F	0:06:14.262-0:06:14.528	IT2	0.175462	8	0.657325
Trial 1	1.1	S_TWN	F	0:06:14.528-0:06:14.794	IT2	0.0974516	8	0.365076
Trial 1	1.1	S_TWN	F	0:06:14.794-0:06:15.060	IT2	0.124815	8	0.467587
Trial 1	1.1	S_TWN	F	0:06:15.060-0:06:15.326	IT2	0.127212	8	0.47657
Trial 1	1.1	S_TWN	F	0:06:15.326-0:06:15.592	IT2	0.185401	8	0.694557
Trial 1	1.1	S_TWN	F	0:06:15.592-0:06:15.858	IT2	0.110691	8	0.414677
Trial 1	1.1	S_TWN	F	0:06:15.858-0:06:16.124	IT2	0.149009	8	0.558223
Trial 1	1.1	S_TWN	F	0:06:16.124-0:06:16.390	IT2	0.20263	8	0.759099
Trial 1	1.1	S_TWN	F	0:06:16.390-0:06:16.656	IT2	0.291973	8	1.0938
Trial 1	1.1	S_TWN	F	0:06:16.656-0:06:16.922	IT2	0.098461	8	0.36886
Trial 1	1.1	S_TWN	F	0:06:16.922-0:06:17.188	IT2	0.110801	8	0.41509
Trial 1	1.1	S_TWN	F	0:06:17.188-0:06:17.454	IT2	0.139216	8	0.521538
Trial 1	1.1	S_TWN	F	0:06:17.454-0:06:17.720	IT2	0.0771239	8	0.288926
Trial 1	1.1	S_TWN	F	0:06:17.720-0:06:17.986	IT2	0.0787144	8	0.294883
Trial 1	1.1	S_TWN	F	0:06:17.986-0:06:18.252	IT2	0.0529662	8	0.198424
Trial 1	1.1	S_TWN	F	0:06:18.252-0:06:18.518	IT2	0.0777286	8	0.291191
Trial 1	1.1	S_TWN	F	0:06:18.518-0:06:18.784	IT2	0.1286	8	0.481768
Trial 1	1.1	S_TWN	F	0:06:18.784-0:06:19.050	IT2	0.107025	8	0.400941
Trial 1	1.1	S_TWN	F	0:06:19.050-0:06:19.316	IT2	0.0573407	8	0.214813
Trial 1	1.1	S_TWN	F	0:06:19.316-0:06:19.582	IT2	0.120548	8	0.451604
Trial 1	1.1	S_TWN	F	0:06:19.582-0:06:19.848	IT2	0.0383146	8	0.143537
Trial 1	1.1	S_TWN	F	0:06:19.848-0:06:20.114	IT2	0.0594082	8	0.222558
Trial 1	1.1	S_TWN	F	0:06:20.114-0:06:20.380	IT2	0.081896	7	0.350631
Trial 1	1.1	S_TWN	F	0:06:20.380-0:06:20.646	IT2	0.0805298	8	0.301687
Trial 1	1.1	S_TWN	F	0:06:20.646-0:06:20.912	IT2	0.186763	8	0.699658
Trial 1	1.1	S_TWN	F	0:06:20.912-0:06:21.178	IT2	0.121441	8	0.454949
Trial 1	1.1	S_TWN	F	0:06:21.178-0:06:21.444	IT2	0.066356	8	0.248587
Trial 1	1.1	S_TWN	F	0:06:21.444-0:06:21.710	IT2	0.0576858	8	0.216105
Trial 1	1.1	S_TWN	F	0:06:21.710-0:06:21.976	IT2	0.0648821	8	0.243064
Trial 1	1.1	S_TWN	F	0:06:21.976-0:06:22.242	IT2	0.0459559	8	0.172162
Trial 1	1.1	S_TWN	F	0:06:22.242-0:06:22.508	IT2	0.0624154	8	0.233824
Trial 1	1.1	S_TWN	F	0:06:22.508-0:06:22.774	IT2	0.0991506	8	0.371443
Trial 1	1.1	S_TWN	F	0:06:22.774-0:06:23.040	IT2	0.0479724	8	0.179717
Trial 1	1.1	S_TWN	F	0:06:23.040-0:06:23.306	IT2	0.0850618	8	0.318665
Trial 1	1.1	S_TWN	F	0:06:23.306-0:06:23.572	IT2	0.0453244	8	0.169797
Trial 1	1.1	S_TWN	F	0:06:23.572-0:06:23.838	IT2	0.061321	8	0.229724
Trial 1	1.1	S_TWN	F	0:06:23.838-0:06:24.104	IT2	0.0929078	8	0.348056
Trial 1	1.1	S_TWN	F	0:06:24.104-0:06:24.370	IT2	0.0530115	8	0.198594
Trial 1	1.1	S_TWN	F	0:06:24.370-0:06:24.636	IT2	0.0721639	8	0.270343
Trial 1	1.1	S_TWN	F	0:06:24.636-0:06:24.902	IT2	0.049421	8	0.185143
Trial 1	1.1	S_TWN	F	0:06:24.902-0:06:25.168	IT2	0.081991	8	0.307157
Trial 1	1.1	S_TWN	F	0:06:25.168-0:06:25.434	IT2	0.0232837	8	0.0872268
Trial 1	1.1	S_TWN	F	0:06:25.434-0:06:25.700	IT2	0.10167	8	0.380881
Trial 1	1.1	S_TWN	F	0:06:25.700-0:06:25.966	IT2	0.0601061	8	0.225173
Trial 1	1.1	S_TWN	F	0:06:25.966-0:06:26.232	IT2	0.064456	8	0.24147
Trial 1	1.1	S_TWN	F	0:06:26.232-0:06:26.498	IT2	0.0479919	8	0.179789
Trial 1	1.1	S_TWN	F	0:06:26.498-0:06:26.764	IT2	0.023033	8	0.0862873
Trial 1	1.1	S_TWN	F	0:06:26.764-0:06:27.030	IT2	0.0635029	8	0.237898
Trial 1	1.1	S_TWN	F	0:06:27.030-0:06:27.296	IT2	0.0193947	8	0.0726571
Trial 1	1.1	S_TWN	F	0:06:27.296-0:06:27.562	IT2	0.0490271	8	0.183668
Trial 1	1.1	S_TWN	F	0:06:27.562-0:06:27.828	IT2	0.0444575	8	0.166549
Trial 1	1.1	S_TWN	F	0:06:27.828-0:06:28.094	IT2	0.0894128	8	0.334964
Trial 1	1.1	S_TWN	F	0:06:28.094-0:06:28.360	IT2	0.0266107	8	0.0996902
Trial 1	1.1	S_TWN	F	0:06:28.360-0:06:28.626	IT2	0.026052	8	0.0975975
Trial 1	1.1	S_TWN	F	0:06:28.626-0:06:28.892	IT2	0.0738004	8	0.276474
Trial 1	1.1	S_TWN	F	0:06:28.892-0:06:29.158	IT2	0.0267044	8	0.100041
Trial 1	1.1	S_TWN	F	0:06:29.158-0:06:29.424	IT2	0.107308	8	0.402001
Trial 1	1.1	S_TWN	F	0:06:29.424-0:06:29.690	IT2	0.0718115	8	0.269023
Trial 1	1.1	S_TWN	F	0:06:29.690-0:06:29.956	IT2	0.191202	7	0.818619
Trial 1	1.1	S_TWN	F	0:06:29.956-0:06:30.222	IT2	0.204014	8	0.76429
Trial 1	1.1	S_TWN	F	0:06:30.222-0:06:30.488	IT2	0.137601	8	0.515486
Trial 1	1.1	S_TWN	F	0:06:30.488-0:06:30.754	IT2	0.111152	8	0.416404
Trial 1	1.1	S_TWN	F	0:06:30.754-0:06:31.020	IT2	0.0501554	8	0.187896
Trial 1	1.1	S_TWN	F	0:06:31.020-0:06:31.286	IT2	0.0333361	8	0.124885
Trial 1	1.1	S_TWN	F	0:06:31.286-0:06:31.552	IT2	0.0295279	8	0.110619
Trial 1	1.1	S_TWN	F	0:06:31.552-0:06:31.818	IT2	0.102229	8	0.382974
Trial 1	1.1	S_TWN	F	0:06:31.818-0:06:32.084	IT2	0.0242871	8	0.0909857
Trial 1	1.1	S_TWN	F	0:06:32.084-0:06:32.350	IT2	0.0411675	8	0.154225
Trial 1	1.1	S_TWN	F	0:06:32.350-0:06:32.616	IT2	0.0313732	8	0.117531
Trial 1	1.1	S_TWN	F	0:06:32.616-0:06:32.882	IT2	0.0824417	8	0.308848
Trial 1	1.1	S_TWN	F	0:06:32.882-0:06:33.148	IT2	0.0556428	8	0.208451
Trial 1	1.1	S_TWN	F	0:06:33.148-0:06:33.414	IT2	0.120154	8	0.450123
Trial 1	1.1	S_TWN	F	0:06:33.414-0:06:33.680	IT2	0.0593563	8	0.222364
Trial 1	1.1	S_TWN	F	0:06:33.680-0:06:33.946	IT2	0.0523307	8	0.196044
Trial 1	1.1	S_TWN	F	0:06:33.946-0:06:34.212	IT2	0.0355578	8	0.133208
Trial 1	1.1	S_TWN	F	0:06:34.212-0:06:34.478	IT2	0.0499581	8	0.187157
Trial 1	1.1	S_TWN	F	0:06:34.478-0:06:34.744	IT2	0.044564	8	0.166948
Trial 1	1.1	S_TWN	F	0:06:34.744-0:06:35.010	IT2	0.0300166	8	0.11245
Trial 1	1.1	S_TWN	F	0:06:35.010-0:06:35.276	IT2	0.0384779	8	0.144147
Trial 1	1.1	S_TWN	F	0:06:35.276-0:06:35.542	IT2	0.0354138	8	0.132669
Trial 1	1.1	S_TWN	F	0:06:35.542-0:06:35.808	IT2	0.0376259	8	0.140955
Trial 1	1.1	S_TWN	F	0:06:35.808-0:06:36.074	IT2	0.0331025	8	0.12401
Trial 1	1.1	S_TWN	F	0:06:36.074-0:06:36.340	IT2	0.0602721	8	0.225794
Trial 1	1.1	S_TWN	F	0:06:36.340-0:06:36.606	IT2	0.0685849	8	0.256935
Trial 1	1.1	S_TWN	F	0:06:36.606-0:06:36.872	IT2	0.0374806	8	0.140412
Trial 1	1.1	S_TWN	F	0:06:36.872-0:06:37.138	IT2	0.0628427	8	0.235425
Trial 1	1.1	S_TWN	F	0:06:37.138-0:06:37.404	IT2	0.0653258	8	0.244726
Trial 1	1.1	S_TWN	F	0:06:37.404-0:06:37.670	IT2	0.0589622	8	0.220887
Trial 1	1.1	S_TWN	F	0:06:37.670-0:06:37.936	IT2	0.0355606	8	0.133219
Trial 1	1.1	S_TWN	F	0:06:37.936-0:06:38.202	IT2	0.0307064	8	0.115034
Trial 1	1.1	S_TWN	F	0:06:38.202-0:06:38.468	IT2	0.0308826	8	0.115694
Trial 1	1.1	S_TWN	F	0:06:38.468-0:06:38.734	IT2	0.0269106	8	0.100814
Trial 1	1.1	S_TWN	F	0:06:38.734-0:06:39.000	IT2	0.0388234	8	0.145442
Trial 1	1.1	S_TWN	F	0:06:39.000-0:06:39.266	IT2	0.0303337	8	0.113637
Trial 1	1.1	S_TWN	F	0:06:39.266-0:06:39.532	IT2	0.0328566	7	0.140673
Trial 1	1.1	S_TWN	F	0:06:39.532-0:06:39.798	IT2	0.0321953	8	0.120612
Trial 1	1.1	S_TWN	F	0:06:39.798-0:06:40.064	IT2	0.0338164	8	0.126685
Trial 1	1.1	S_TWN	F	0:06:40.064-0:06:40.330	IT2	0.0458598	8	0.171803
Trial 1	1.1	S_TWN	F	0:06:40.330-0:06:40.596	IT2	0.074761	8	0.280072
Trial 1	1.1	S_TWN	F	0:06:40.596-0:06:40.862	IT2	0.0571721	8	0.21418
Trial 1	1.1	S_TWN	F	0:06:40.862-0:06:41.128	IT2	0.0245908	8	0.0921233
Trial 1	1.1	S_TWN	F	0:06:41.128-0:06:41.394	IT2	0.035592	8	0.133337
Trial 1	1.1	S_TWN	F	0:06:41.394-0:06:41.660	IT2	0.0133056	8	0.0498461
Trial 1	1.1	S_TWN	F	0:06:41.660-0:06:41.926	IT2	0.0290735	8	0.108917
Trial 1	1.1	S_TWN	F	0:06:41.926-0:06:42.192	IT2	0.0461054	8	0.172723
Trial 1	1.1	S_TWN	F	0:06:42.192-0:06:42.458	IT2	0.0522946	8	0.195908
Trial 1	1.1	S_TWN	F	0:06:42.458-0:06:42.724	IT2	0.0258229	8	0.0967386
Trial 1	1.1	S_TWN	F	0:06:42.724-0:06:42.990	IT2	0.021267	8	0.0796719
Trial 1	1.1	S_TWN	F	0:06:42.990-0:06:43.256	IT2	0.0775334	8	0.290458
Trial 1	1.1	S_TWN	F	0:06:43.256-0:06:43.522	IT2	0.0653954	8	0.244988
Trial 1	1.1	S_TWN	F	0:06:43.522-0:06:43.788	IT2	0.0663257	8	0.248472
Trial 1	1.1	S_TWN	F	0:06:43.788-0:06:44.054	IT2	0.0102554	8	0.0384193
Trial 1	1.1	S_TWN	F	0:06:44.054-0:06:44.320	IT2	0.0545293	8	0.204281
Trial 1	1.1	S_TWN	F	0:06:44.320-0:06:44.586	IT2	0.0295383	8	0.110657
Trial 1	1.1	S_TWN	F	0:06:44.586-0:06:44.852	IT2	0.0898166	8	0.336474
Trial 1	1.1	S_TWN	F	0:06:44.852-0:06:45.118	IT2	0.0598929	8	0.224375
Trial 1	1.1	S_TWN	F	0:06:45.118-0:06:45.384	IT2	0.0263407	8	0.0986785
Trial 1	1.1	S_TWN	F	0:06:45.384-0:06:45.650	IT2	0.038478	8	0.144149
Trial 1	1.1	S_TWN	F	0:06:45.650-0:06:45.916	IT2	0.0374123	8	0.140156
Trial 1	1.1	S_TWN	F	0:06:45.916-0:06:46.182	IT2	0.134346	8	0.503292
Trial 1	1.1	S_TWN	F	0:06:46.182-0:06:46.448	IT2	0.0764688	8	0.286471
Trial 1	1.1	S_TWN	F	0:06:46.448-0:06:46.714	IT2	0.0954604	8	0.357617
Trial 1	1.1	S_TWN	F	0:06:46.714-0:06:46.980	IT2	0.0462579	8	0.173294
Trial 1	1.1	S_TWN	F	0:06:46.980-0:06:47.246	IT2	0.046373	8	0.173725
Trial 1	1.1	S_TWN	F	0:06:47.246-0:06:47.512	IT2	0.111575	8	0.417988
Trial 1	1.1	S_TWN	F	0:06:47.512-0:06:47.778	IT2	0.0208671	8	0.0781737
Trial 1	1.1	S_TWN	F	0:06:47.778-0:06:48.044	IT2	0.0744609	8	0.278951
Trial 1	1.1	S_TWN	F	0:06:48.044-0:06:48.310	IT2	0.0337461	8	0.126421
Trial 1	1.1	S_TWN	F	0:06:48.310-0:06:48.576	IT2	0.0651372	8	0.244019
Trial 1	1.1	S_TWN	F	0:06:48.576-0:06:48.842	IT2	0.0288911	7	0.123695
Trial 1	1.1	S_TWN	F	0:06:48.842-0:06:49.108	IT2	0.0557644	8	0.208908
Trial 1	1.1	S_TWN	F	0:06:49.108-0:06:49.374	IT2	0.0444909	8	0.166675
Trial 1	1.1	S_TWN	F	0:06:49.374-0:06:49.640	IT2	0.0415062	8	0.155492
Trial 1	1.1	S_TWN	F	0:06:49.640-0:06:49.906	IT2	0.0858854	8	0.321749
Trial 1	1.1	S_TWN	F	0:06:49.906-0:06:50.172	IT2	0.0231254	8	0.0866337
Trial 1	1.1	S_TWN	F	0:06:50.172-0:06:50.438	IT2	0.0539555	8	0.202132
Trial 1	1.1	S_TWN	F	0:06:50.438-0:06:50.704	IT2	0.0212676	8	0.0796741
Trial 1	1.1	S_TWN	F	0:06:50.704-0:06:50.970	IT2	0.0878011	8	0.328924
Trial 1	1.1	S_TWN	F	0:06:50.970-0:06:51.236	IT2	0.0640463	8	0.239933
Trial 1	1.1	S_TWN	F	0:06:51.236-0:06:51.502	IT2	0.0745597	8	0.27932
Trial 1	1.1	S_TWN	F	0:06:51.502-0:06:51.768	IT2	0.0586055	8	0.219551
Trial 1	1.1	S_TWN	F	0:06:51.768-0:06:52.034	IT2	0.0357183	8	0.13381
Trial 1	1.1	S_TWN	F	0:06:52.034-0:06:52.300	IT2	0.0683058	8	0.255891
Trial 1	1.1	S_TWN	F	0:06:52.300-0:06:52.566	IT2	0.053328	8	0.199779
Trial 1	1.1	S_TWN	F	0:06:52.566-0:06:52.832	IT2	0.0750177	8	0.281034
Trial 1	1.1	S_TWN	F	0:06:52.832-0:06:53.098	IT2	0.0363224	8	0.136072
Trial 1	1.1	S_TWN	F	0:06:53.098-0:06:53.364	IT2	0.0383935	8	0.143832
Trial 1	1.1	S_TWN	F	0:06:53.364-0:06:53.630	IT2	0.032284	8	0.120944
Trial 1	1.1	S_TWN	F	0:06:53.630-0:06:53.896	IT2	0.0505379	8	0.189328
Trial 1	1.1	S_TWN	F	0:06:53.896-0:06:54.162	IT2	0.051665	8	0.193549
Trial 1	1.1	S_TWN	F	0:06:54.162-0:06:54.428	IT2	0.0241957	8	0.0906426
Trial 1	1.1	S_TWN	F	0:06:54.428-0:06:54.694	IT2	0.0734325	8	0.275097
Trial 1	1.1	S_TWN	F	0:06:54.694-0:06:54.960	IT2	0.0420972	8	0.157707
Trial 1	1.1	S_TWN	F	0:06:54.960-0:06:55.226	IT2	0.0966884	8	0.36222
Trial 1	1.1	S_TWN	F	0:06:55.226-0:06:55.492	IT2	0.0432647	8	0.162081
Trial 1	1.1	S_TWN	F	0:06:55.492-0:06:55.758	IT2	0.0513949	8	0.192538
Trial 1	1.1	S_TWN	F	0:06:55.758-0:06:56.024	IT2	0.103105	8	0.386255
Trial 1	1.1	S_TWN	F	0:06:56.024-0:06:56.290	IT2	0.0871212	8	0.326377
Trial 1	1.1	S_TWN	F	0:06:56.290-0:06:56.556	IT2	0.0352595	8	0.132092
Trial 1	1.1	S_TWN	F	0:06:56.556-0:06:56.822	IT2	0.0303378	8	0.113652
Trial 1	1.1	S_TWN	F	0:06:56.822-0:06:57.088	IT2	0.0447855	8	0.167778
Trial 1	1.1	S_TWN	F	0:06:57.088-0:06:57.354	IT2	0.0237618	8	0.0890186
Trial 1	1.1	S_TWN	F	0:06:57.354-0:06:57.620	IT2	0.0513755	8	0.192466
Trial 1	1.1	S_TWN	F	0:06:57.620-0:06:57.886	IT2	0.0305679	8	0.114515
Trial 1	1.1	S_TWN	F	0:06:57.886-0:06:58.152	IT2	0.0528932	8	0.19815
Trial 1	1.1	S_TWN	F	0:06:58.152-0:06:58.418	IT2	0.0354789	7	0.1519
Trial 1	1.1	S_TWN	F	0:06:58.418-0:06:58.684	IT2	0.0605238	8	0.226739
Trial 1	1.1	S_TWN	F	0:06:58.684-0:06:58.950	IT2	0.0412627	8	0.15458
Trial 1	1.1	S_TWN	F	0:06:58.950-0:06:59.216	IT2	0.0254056	8	0.0951757
Trial 1	1.1	S_TWN	F	0:06:59.216-0:06:59.482	IT2	0.0236914	8	0.0887543
Trial 1	1.1	S_TWN	F	0:06:59.482-0:06:59.748	IT2	0.0138527	8	0.0518957
Trial 1	1.1	S_TWN	F	0:06:59.748-0:07:00.014	IT2	0.0393573	8	0.147443
Trial 1	1.1	S_TWN	F	0:07:00.014-0:07:00.280	IT2	0.0463546	8	0.173656
Trial 1	1.1	S_TWN	F	0:07:00.280-0:07:00.546	IT2	0.0639818	8	0.239692
Trial 1	1.1	S_TWN	F	0:07:00.546-0:07:00.812	IT2	0.0317644	8	0.118997
Trial 1	1.1	S_TWN	F	0:07:00.812-0:07:01.078	IT2	0.0408733	8	0.153121
Trial 1	1.1	S_TWN	F	0:07:01.078-0:07:01.344	IT2	0.0623715	8	0.233659
Trial 1	1.1	S_TWN	F	0:07:01.344-0:07:01.610	IT2	0.0219793	8	0.0823395
Trial 1	1.1	S_TWN	F	0:07:01.610-0:07:01.876	IT2	0.0715424	8	0.268014
Trial 1	1.1	S_TWN	F	0:07:01.876-0:07:02.142	IT2	0.0414144	8	0.155149
Trial 1	1.1	S_TWN	F	0:07:02.142-0:07:02.408	IT2	0.0526148	8	0.197108
Trial 1	1.1	S_TWN	F	0:07:02.408-0:07:02.674	IT2	0.0595522	8	0.2231
Trial 1	1.1	S_TWN	F	0:07:02.674-0:07:02.940	IT2	0.0790818	8	0.296259
Trial 1	1.1	S_TWN	F	0:07:02.940-0:07:03.206	IT2	0.0268882	8	0.10073
Trial 1	1.1	S_TWN	F	0:07:03.206-0:07:03.472	IT2	0.034492	8	0.129216
Trial 1	1.1	S_TWN	F	0:07:03.472-0:07:03.738	IT2	0.0531683	8	0.199181
Trial 1	1.1	S_TWN	F	0:07:03.738-0:07:04.004	IT2	0.0213882	8	0.0801256
Trial 1	1.1	S_TWN	F	0:07:04.004-0:07:04.270	IT2	0.106669	8	0.399607
Trial 1	1.1	S_TWN	F	0:07:04.270-0:07:04.536	IT2	0.040556	8	0.151934
Trial 1	1.1	S_TWN	F	0:07:04.536-0:07:04.802	IT2	0.068175	8	0.255401
Trial 1	1.1	S_TWN	F	0:07:04.802-0:07:05.068	IT2	0.0247277	8	0.0926355
Trial 1	1.1	S_TWN	F	0:07:05.068-0:07:05.334	IT2	0.0445296	8	0.166821
Trial 1	1.1	S_TWN	F	0:07:05.334-0:07:05.600	IT2	0.0267993	8	0.100396
Trial 1	1.1	S_TWN	F	0:07:05.600-0:07:05.866	IT2	0.0253371	8	0.0949191
Trial 1	1.1	S_TWN	F	0:07:05.866-0:07:06.132	IT2	0.0455373	8	0.170596
Trial 1	1.1	S_TWN	F	0:07:06.132-0:07:06.398	IT2	0.0286787	8	0.107437
Trial 1	1.1	S_TWN	F	0:07:06.398-0:07:06.664	IT2	0.0876855	8	0.328491
Trial 1	1.1	S_TWN	F	0:07:06.664-0:07:06.930	IT2	0.0273486	8	0.102455
Trial 1	1.1	S_TWN	F	0:07:06.930-0:07:07.196	IT2	0.118908	8	0.445459
Trial 1	1.1	S_TWN	F	0:07:07.196-0:07:07.462	IT2	0.0306596	8	0.114858
Trial 1	1.1	S_TWN	F	0:07:07.462-0:07:07.728	IT2	0.13003	8	0.487122
Trial 1	1.1	S_TWN	F	0:07:07.728-0:07:07.994	IT2	0.0187189	7	0.0801438
Trial 1	1.1	S_TWN	F	0:07:07.994-0:07:08.260	IT2	0.0427167	8	0.160029
Trial 1	1.1	S_TWN	F	0:07:08.260-0:07:08.526	IT2	0.082082	8	0.307499
Trial 1	1.1	S_TWN	F	0:07:08.526-0:07:08.792	IT2	0.0288579	8	0.108108
Trial 1	1.1	S_TWN	F	0:07:08.792-0:07:09.058	IT2	0.0566488	8	0.212221
Trial 1	1.1	S_TWN	F	0:07:09.058-0:07:09.324	IT2	0.0294168	8	0.110203
Trial 1	1.1	S_TWN	F	0:07:09.324-0:07:09.590	IT2	0.134057	8	0.502209
Trial 1	1.1	S_TWN	F	0:07:09.590-0:07:09.856	IT2	0.0255613	8	0.0957588
Trial 1	1.1	S_TWN	F	0:07:09.856-0:07:10.122	IT2	0.0989664	8	0.37075
Trial 1	1.1	S_TWN	F	0:07:10.122-0:07:10.388	IT2	0.0318815	8	0.119436
Trial 1	1.1	S_TWN	F	0:07:10.388-0:07:10.654	IT2	0.0352788	8	0.132163
Trial 1	1.1	S_TWN	F	0:07:10.654-0:07:10.920	IT2	0.0382632	8	0.143344
Trial 1	1.1	S_TWN	F	0:07:10.920-0:07:11.186	IT2	0.0312262	8	0.116982
Trial 1	1.1	S_TWN	F	0:07:11.186-0:07:11.452	IT2	0.0624132	8	0.233814
Trial 1	1.1	S_TWN	F	0:07:11.452-0:07:11.718	IT2	0.0192324	8	0.0720493
Trial 1	1.1	S_TWN	F	0:07:11.718-0:07:11.984	IT2	0.099312	8	0.372046
Trial 1	1.1	S_TWN	F	0:07:11.984-0:07:12.250	IT2	0.0507895	8	0.19027
Trial 1	1.1	S_TWN	F	0:07:12.250-0:07:12.516	IT2	0.0840764	8	0.31497
Trial 1	1.1	S_TWN	F	0:07:12.516-0:07:12.782	IT2	0.0690186	8	0.258561
Trial 1	1.1	S_TWN	F	0:07:12.782-0:07:13.048	IT2	0.0749373	8	0.280735
Trial 1	1.1	S_TWN	F	0:07:13.048-0:07:13.314	IT2	0.124043	8	0.464696
Trial 1	1.1	S_TWN	F	0:07:13.314-0:07:13.580	IT2	0.0325119	8	0.121798
Trial 1	1.1	S_TWN	F	0:07:13.580-0:07:13.846	IT2	0.0855729	8	0.320577
Trial 1	1.1	S_TWN	F	0:07:13.846-0:07:14.112	IT2	0.0274944	8	0.103001
Trial 1	1.1	S_TWN	F	0:07:14.112-0:07:14.378	IT2	0.0451324	8	0.169078
Trial 1	1.1	S_TWN	F	0:07:14.378-0:07:14.644	IT2	0.0676034	8	0.253258
Trial 1	1.1	S_TWN	F	0:07:14.644-0:07:14.910	IT2	0.0989764	8	0.37079
Trial 1	1.1	S_TWN	F	0:07:14.910-0:07:15.176	IT2	0.0493559	8	0.184899
Trial 1	1.1	S_TWN	F	0:07:15.176-0:07:15.442	IT2	0.0218269	8	0.081769
Trial 1	1.1	S_TWN	F	0:07:15.442-0:07:15.708	IT2	0.0546701	8	0.204809
Trial 1	1.1	S_TWN	F	0:07:15.708-0:07:15.974	IT2	0.0255044	8	0.0955455
Trial 1	1.1	S_TWN	F	0:07:15.974-0:07:16.240	IT2	0.0248703	8	0.0931707
Trial 1	1.1	S_TWN	F	0:07:16.240-0:07:16.506	IT2	0.0161066	8	0.0603395
Trial 1	1.1	S_TWN	F	0:07:16.506-0:07:16.772	IT2	0.029336	8	0.109899
Trial 1	1.1	S_TWN	F	0:07:16.772-0:07:17.038	IT2	0.0256944	8	0.0962576
Trial 1	1.1	S_TWN	F	0:07:17.038-0:07:17.304	IT2	0.0596409	8	0.223431
Trial 1	1.1	S_TWN	F	0:07:17.304-0:07:17.570	IT2	0.0383498	7	0.164191
Trial 1	1.1	S_TWN	F	0:07:17.570-0:07:17.836	IT2	0.0549738	8	0.205945
Trial 1	1.1	S_TWN	F	0:07:17.836-0:07:18.102	IT2	0.0644004	8	0.24126
Trial 1	1.1	S_TWN	F	0:07:18.102-0:07:18.368	IT2	0.025285	8	0.0947245
Trial 1	1.1	S_TWN	F	0:07:18.368-0:07:18.634	IT2	0.0863624	8	0.323534
Trial 1	1.1	S_TWN	F	0:07:18.634-0:07:18.900	IT2	0.091126	8	0.341382
Trial 1	1.1	S_TWN	F	0:07:18.900-0:07:19.166	IT2	0.0837586	8	0.31378
Trial 1	1.1	S_TWN	F	0:07:19.166-0:07:19.432	IT2	0.0338577	8	0.126839
Trial 1	1.1	S_TWN	F	0:07:19.432-0:07:19.698	IT2	0.0611521	8	0.229091
Trial 1	1.1	S_TWN	F	0:07:19.698-0:07:19.964	IT2	0.0398335	8	0.149226
Trial 1	1.1	S_TWN	F	0:07:19.964-0:07:20.230	IT2	0.0676422	8	0.253403
Trial 1	1.1	S_TWN	F	0:07:20.230-0:07:20.496	IT2	0.0361441	8	0.135405
Trial 1	1.1	S_TWN	F	0:07:20.496-0:07:20.762	IT2	0.0291998	8	0.109389
Trial 1	1.1	S_TWN	F	0:07:20.762-0:07:21.028	IT2	0.0221177	8	0.0828582
Trial 1	1.1	S_TWN	F	0:07:21.028-0:07:21.294	IT2	0.0164758	8	0.0617229
Trial 1	1.1	S_TWN	F	0:07:21.294-0:07:21.560	IT2	0.044881	8	0.168135
Trial 1	1.1	S_TWN	F	0:07:21.560-0:07:21.826	IT2	0.063704	8	0.23865
Trial 1	1.1	S_TWN	F	0:07:21.826-0:07:22.092	IT2	0.0521341	8	0.195307
Trial 1	1.1	S_TWN	F	0:07:22.092-0:07:22.358	IT2	0.0380249	8	0.142451
Trial 1	1.1	S_TWN	F	0:07:22.358-0:07:22.624	IT2	0.0104209	8	0.0390391
Trial 1	1.1	S_TWN	F	0:07:22.624-0:07:22.890	IT2	0.0594528	8	0.222724
Trial 1	1.1	S_TWN	F	0:07:22.890-0:07:23.156	IT2	0.0217061	8	0.0813168
Trial 1	1.1	S_TWN	F	0:07:23.156-0:07:23.422	IT2	0.0360877	8	0.135195
Trial 1	1.1	S_TWN	F	0:07:23.422-0:07:23.688	IT2	0.0190959	8	0.0715388
Trial 1	1.1	S_TWN	F	0:07:23.688-0:07:23.954	IT2	0.0323704	8	0.121267
Trial 1	1.1	S_TWN	F	0:07:23.954-0:07:24.220	IT2	0.041579	8	0.155765
Trial 1	1.1	S_TWN	F	0:07:24.220-0:07:24.486	IT2	0.0422046	8	0.158109
Trial 1	1.1	S_TWN	F	0:07:24.486-0:07:24.752	IT2	0.0376246	8	0.140951
Trial 1	1.1	S_TWN	F	0:07:24.752-0:07:25.018	IT2	0.0211187	8	0.0791168
Trial 1	1.1	S_TWN	F	0:07:25.018-0:07:25.284	IT2	0.0547226	8	0.205004
Trial 1	1.1	S_TWN	F	0:07:25.284-0:07:25.550	IT2	0.0246692	8	0.0924172
Trial 1	1.1	S_TWN	F	0:07:25.550-0:07:25.816	IT2	0.0497628	8	0.186423
Trial 1	1.1	S_TWN	F	0:07:25.816-0:07:26.082	IT2	0.0795019	8	0.297835
Trial 1	1.1	S_TWN	F	0:07:26.082-0:07:26.348	IT2	0.0659419	8	0.247036
Trial 1	1.1	S_TWN	F	0:07:26.348-0:07:26.614	IT2	0.0465505	8	0.17439
Trial 1	1.1	S_TWN	F	0:07:26.614-0:07:26.880	IT2	0.0511216	7	0.218874
Trial 1	1.1	S_TWN	F	0:07:26.880-0:07:27.146	IT2	0.0668555	8	0.250457
Trial 1	1.1	S_TWN	F	0:07:27.146-0:07:27.412	IT2	0.045547	8	0.17063
Trial 1	1.1	S_TWN	F	0:07:27.412-0:07:27.678	IT2	0.0672257	8	0.251845
Trial 1	1.1	S_TWN	F	0:07:27.678-0:07:27.944	IT2	0.038972	8	0.145999
Trial 1	1.1	S_TWN	F	0:07:27.944-0:07:28.210	IT2	0.041678	8	0.156137
Trial 1	1.1	S_TWN	F	0:07:28.210-0:07:28.476	IT2	0.0229855	8	0.0861094
Trial 1	1.1	S_TWN	F	0:07:28.476-0:07:28.742	IT2	0.0799639	8	0.299564
Trial 1	1.1	S_TWN	F	0:07:28.742-0:07:29.008	IT2	0.0440241	8	0.164925
Trial 1	1.1	S_TWN	F	0:07:29.008-0:07:29.274	IT2	0.0553018	8	0.207177
Trial 1	1.1	S_TWN	F	0:07:29.274-0:07:29.540	IT2	0.0910826	8	0.341217
Trial 1	1.1	S_TWN	F	0:07:29.540-0:07:29.806	IT2	0.0184577	8	0.0691467
Trial 1	1.1	S_TWN	F	0:07:29.806-0:07:30.072	IT2	0.0949152	8	0.355576
Trial 1	1.1	S_TWN	F	0:07:30.072-0:07:30.338	IT2	0.0354922	8	0.132962
Trial 1	1.1	S_TWN	F	0:07:30.338-0:07:30.604	IT2	0.0917798	8	0.343828
Trial 1	1.1	S_TWN	F	0:07:30.604-0:07:30.870	IT2	0.0427844	8	0.16028
Trial 1	1.1	S_TWN	F	0:07:30.870-0:07:31.136	IT2	0.0451374	8	0.169095
Trial 1	1.1	S_TWN	F	0:07:31.136-0:07:31.402	IT2	0.0896192	8	0.335739
Trial 1	1.1	S_TWN	F	0:07:31.402-0:07:31.668	IT2	0.0516892	8	0.193639
Trial 1	1.1	S_TWN	F	0:07:31.668-0:07:31.934	IT2	0.0905789	8	0.339332
Trial 1	1.1	S_TWN	F	0:07:31.934-0:07:32.200	IT2	0.0547732	8	0.205193
Trial 1	1.1	S_TWN	F	0:07:32.200-0:07:32.466	IT2	0.0668186	8	0.25032
Trial 1	1.1	S_TWN	F	0:07:32.466-0:07:32.732	IT2	0.0226192	8	0.0847382
Trial 1	1.1	S_TWN	F	0:07:32.732-0:07:32.998	IT2	0.0475601	8	0.178171
Trial 1	1.1	S_TWN	F	0:07:32.998-0:07:33.264	IT2	0.0667792	8	0.250171
Trial 1	1.1	S_TWN	F	0:07:33.264-0:07:33.530	IT2	0.0574727	8	0.215307
Trial 1	1.1	S_TWN	F	0:07:33.530-0:07:33.796	IT2	0.0789845	8	0.295894
Trial 1	1.1	S_TWN	F	0:07:33.796-0:07:34.062	IT2	0.0397578	8	0.148942
Trial 1	1.1	S_TWN	F	0:07:34.062-0:07:34.328	IT2	0.05132	8	0.192256
Trial 1	1.1	S_TWN	F	0:07:34.328-0:07:34.594	IT2	0.0347166	8	0.130057
Trial 1	1.1	S_TWN	F	0:07:34.594-0:07:34.860	IT2	0.0476332	8	0.178445
Trial 1	1.1	S_TWN	F	0:07:34.860-0:07:35.126	IT2	0.0374527	8	0.140306
Trial 1	1.1	S_TWN	F	0:07:35.126-0:07:35.392	IT2	0.0399818	8	0.149784
Trial 1	1.1	S_TWN	F	0:07:35.392-0:07:35.658	IT2	0.0216046	8	0.0809365
Trial 1	1.1	S_TWN	F	0:07:35.658-0:07:35.924	IT2	0.054273	8	0.203322
Trial 1	1.1	S_TWN	F	0:07:35.924-0:07:36.190	IT2	0.0829029	8	0.310574
Trial 1	1.1	S_TWN	F	0:07:36.190-0:07:36.456	IT2	0.0379176	7	0.162342
Trial 1	1.1	S_TWN	F	0:07:36.456-0:07:36.722	IT2	0.0606372	8	0.227161
Trial 1	1.1	S_TWN	F	0:07:36.722-0:07:36.988	IT2	0.0350227	8	0.131203
Trial 1	1.1	S_TWN	F	0:07:36.988-0:07:37.254	IT2	0.0823671	8	0.308566
Trial 1	1.1	S_TWN	F	0:07:37.254-0:07:37.520	IT2	0.0293344	8	0.109895
Trial 1	1.1	S_TWN	F	0:07:37.520-0:07:37.786	IT2	0.034725	8	0.130088
Trial 1	1.1	S_TWN	F	0:07:37.786-0:07:38.052	IT2	0.0445884	8	0.16704
Trial 1	1.1	S_TWN	F	0:07:38.052-0:07:38.318	IT2	0.0704242	8	0.263827
Trial 1	1.1	S_TWN	F	0:07:38.318-0:07:38.584	IT2	0.0464925	8	0.174173
Trial 1	1.1	S_TWN	F	0:07:38.584-0:07:38.850	IT2	0.0338129	8	0.126672
Trial 1	1.1	S_TWN	F	0:07:38.850-0:07:39.116	IT2	0.0475593	8	0.178168
Trial 1	1.1	S_TWN	F	0:07:39.116-0:07:39.382	IT2	0.0141058	8	0.0528434
Trial 1	1.1	S_TWN	F	0:07:39.382-0:07:39.648	IT2	0.0558097	8	0.209076
Trial 1	1.1	S_TWN	F	0:07:39.648-0:07:39.914	IT2	0.0321644	8	0.120496
Trial 1	1.1	S_TWN	F	0:07:39.914-0:07:40.180	IT2	0.0406528	8	0.152295
Trial 1	1.1	S_TWN	F	0:07:40.180-0:07:40.446	IT2	0.038026	8	0.142456
Trial 1	1.1	S_TWN	F	0:07:40.446-0:07:40.712	IT2	0.042179	8	0.158013
Trial 1	1.1	S_TWN	F	0:07:40.712-0:07:40.978	IT2	0.0707035	8	0.264871
Trial 1	1.1	S_TWN	F	0:07:40.978-0:07:41.244	IT2	0.040756	8	0.152683
Trial 1	1.1	S_TWN	F	0:07:41.244-0:07:41.510	IT2	0.0446713	8	0.167351
Trial 1	1.1	S_TWN	F	0:07:41.510-0:07:41.776	IT2	0.0283502	8	0.106207
Trial 1	1.1	S_TWN	F	0:07:41.776-0:07:42.042	IT2	0.0462349	8	0.173208
Trial 1	1.1	S_TWN	F	0:07:42.042-0:07:42.308	IT2	0.0129825	8	0.0486356
Trial 1	1.1	S_TWN	F	0:07:42.308-0:07:42.574	IT2	0.0483371	8	0.181083
Trial 1	1.1	S_TWN	F	0:07:42.574-0:07:42.840	IT2	0.0508806	8	0.190611
Trial 1	1.1	S_TWN	F	0:07:42.840-0:07:43.106	IT2	0.0355248	8	0.133084
Trial 1	1.1	S_TWN	F	0:07:43.106-0:07:43.372	IT2	0.0319508	8	0.119695
Trial 1	1.1	S_TWN	F	0:07:43.372-0:07:43.638	IT2	0.0206435	8	0.0773355
Trial 1	1.1	S_TWN	F	0:07:43.638-0:07:43.904	IT2	0.0362619	8	0.135846
Trial 1	1.1	S_TWN	F	0:07:43.904-0:07:44.170	IT2	0.041767	8	0.15647
Trial 1	1.1	S_TWN	F	0:07:44.170-0:07:44.436	IT2	0.0962437	8	0.360552
Trial 1	1.1	S_TWN	F	0:07:44.436-0:07:44.702	IT2	0.0270037	8	0.101162
Trial 1	1.1	S_TWN	F	0:07:44.702-0:07:44.968	IT2	0.0199642	8	0.0747911
Trial 1	1.1	S_TWN	F	0:07:44.968-0:07:45.234	IT2	0.0207751	8	0.0778288
Trial 1	1.1	S_TWN	F	0:07:45.234-0:07:45.500	IT2	0.0202328	8	0.0757973
Trial 1	1.1	S_TWN	F	0:07:45.500-0:07:45.766	IT2	0.0235195	8	0.0881094
Trial 1	1.1	S_TWN	F	0:07:45.766-0:07:46.032	IT2	0.0149913	7	0.0641842
Trial 1	1.1	S_TWN	F	0:07:46.032-0:07:46.298	IT2	0.0537229	8	0.201259
Trial 1	1.1	S_TWN	F	0:07:46.298-0:07:46.564	IT2	0.022984	8	0.0861033
Trial 1	1.1	S_TWN	F	0:07:46.564-0:07:46.830	IT2	0.0552192	8	0.206864
Trial 1	1.1	S_TWN	F	0:07:46.830-0:07:47.096	IT2	0.0319108	8	0.119546
Trial 1	1.1	S_TWN	F	0:07:47.096-0:07:47.362	IT2	0.0424922	8	0.159187
Trial 1	1.1	S_TWN	F	0:07:47.362-0:07:47.628	IT2	0.0297707	8	0.111529
Trial 1	1.1	S_TWN	F	0:07:47.628-0:07:47.894	IT2	0.0133391	8	0.0499713
Trial 1	1.1	S_TWN	F	0:07:47.894-0:07:48.160	IT2	0.0427033	8	0.159979
Trial 1	1.1	S_TWN	F	0:07:48.160-0:07:48.426	IT2	0.0275567	8	0.103235
Trial 1	1.1	S_TWN	F	0:07:48.426-0:07:48.692	IT2	0.0669461	8	0.250797
Trial 1	1.1	S_TWN	F	0:07:48.692-0:07:48.958	IT2	0.0604634	8	0.226513
Trial 1	1.1	S_TWN	F	0:07:48.958-0:07:49.224	IT2	0.0628417	8	0.23542
Trial 1	1.1	S_TWN	F	0:07:49.224-0:07:49.490	IT2	0.0295748	8	0.110795
Trial 1	1.1	S_TWN	F	0:07:49.490-0:07:49.756	IT2	0.0384913	8	0.144198
Trial 1	1.1	S_TWN	F	0:07:49.756-0:07:50.022	IT2	0.0184784	8	0.0692246
Trial 1	1.1	S_TWN	F	0:07:50.022-0:07:50.288	IT2	0.0152715	8	0.0572113
Trial 1	1.1	S_TWN	F	0:07:50.288-0:07:50.554	IT2	0.0739999	8	0.27722
Trial 1	1.1	S_TWN	F	0:07:50.554-0:07:50.820	IT2	0.0222058	8	0.0831888
Trial 1	1.1	S_TWN	F	0:07:50.820-0:07:51.086	IT2	0.0469508	8	0.175889
Trial 1	1.1	S_TWN	F	0:07:51.086-0:07:51.352	IT2	0.0142322	8	0.0533177
Trial 1	1.1	S_TWN	F	0:07:51.352-0:07:51.618	IT2	0.0465008	8	0.174204
Trial 1	1.1	S_TWN	F	0:07:51.618-0:07:51.884	IT2	0.0366409	8	0.137265
Trial 1	1.1	S_TWN	F	0:07:51.884-0:07:52.150	IT2	0.0396644	8	0.148592
Trial 1	1.1	S_TWN	F	0:07:52.150-0:07:52.416	IT2	0.0319134	8	0.119556
Trial 1	1.1	S_TWN	F	0:07:52.416-0:07:52.682	IT2	0.0185372	8	0.0694446
Trial 1	1.1	S_TWN	F	0:07:52.682-0:07:52.948	IT2	0.022768	8	0.0852953
Trial 1	1.1	S_TWN	F	0:07:52.948-0:07:53.214	IT2	0.0212886	8	0.0797533
Trial 1	1.1	S_TWN	F	0:07:53.214-0:07:53.480	IT2	0.0285079	8	0.106798
Trial 1	1.1	S_TWN	F	0:07:53.480-0:07:53.746	IT2	0.0428204	8	0.160415
Trial 1	1.1	S_TWN	F	0:07:53.746-0:07:54.012	IT2	0.0464637	8	0.174064
Trial 1	1.1	S_TWN	F	0:07:54.012-0:07:54.278	IT2	0.0527458	8	0.1976
Trial 1	1.1	S_TWN	F	0:07:54.278-0:07:54.544	IT2	0.0346522	8	0.129816
Trial 1	1.1	S_TWN	F	0:07:54.544-0:07:54.810	IT2	0.0438796	8	0.164383
Trial 1	1.1	S_TWN	F	0:07:54.810-0:07:55.076	IT2	0.0262744	8	0.0984306
Trial 1	1.1	S_TWN	F	0:07:55.076-0:07:55.342	IT2	0.0240573	7	0.102999
Trial 1	1.1	S_TWN	F	0:07:55.342-0:07:55.608	IT2	0.0524017	8	0.19631
Trial 1	1.1	S_TWN	F	0:07:55.608-0:07:55.874	IT2	0.0867609	8	0.325028
Trial 1	1.1	S_TWN	F	0:07:55.874-0:07:56.140	IT2	0.0247296	8	0.0926427
Trial 1	1.1	S_TWN	F	0:07:56.140-0:07:56.406	IT2	0.0895645	8	0.335533
Trial 1	1.1	S_TWN	F	0:07:56.406-0:07:56.672	IT2	0.0401798	8	0.150523
Trial 1	1.1	S_TWN	F	0:07:56.672-0:07:56.938	IT2	0.0544689	8	0.204053
Trial 1	1.1	S_TWN	F	0:07:56.938-0:07:57.204	IT2	0.0388417	8	0.145511
Trial 1	1.1	S_TWN	F	0:07:57.204-0:07:57.470	IT2	0.0305385	8	0.114406
Trial 1	1.1	S_TWN	F	0:07:57.470-0:07:57.736	IT2	0.0794924	8	0.297798
Trial 1	1.1	S_TWN	F	0:07:57.736-0:07:58.002	IT2	0.0263675	8	0.0987796
Trial 1	1.1	S_TWN	F	0:07:58.002-0:07:58.268	IT2	0.068836	8	0.257876
Trial 1	1.1	S_TWN	F	0:07:58.268-0:07:58.534	IT2	0.0361344	8	0.135369
Trial 1	1.1	S_TWN	F	0:07:58.534-0:07:58.800	IT2	0.0413276	8	0.154824
Trial 1	1.1	S_TWN	F	0:07:58.800-0:07:59.066	IT2	0.0686524	8	0.257189
Trial 1	1.1	S_TWN	F	0:07:59.066-0:07:59.332	IT2	0.0461317	8	0.172822
Trial 1	1.1	S_TWN	F	0:07:59.332-0:07:59.598	IT2	0.0445301	8	0.166821
Trial 1	1.1	S_TWN	F	0:07:59.598-0:07:59.864	IT2	0.0248676	8	0.0931606
Trial 1	1.1	S_TWN	F	0:07:59.864-0:08:00.130	IT2	0.0839683	8	0.314566
Trial 1	1.1	S_TWN	F	0:08:00.130-0:08:00.396	IT2	0.0168735	8	0.0632122
Trial 1	1.1	S_TWN	F	0:08:00.396-0:08:00.662	IT2	0.043828	8	0.164191
Trial 1	1.1	S_TWN	F	0:08:00.662-0:08:00.928	IT2	0.0183594	8	0.0687788
Trial 1	1.1	S_TWN	F	0:08:00.928-0:08:01.194	IT2	0.03991	8	0.149513
Trial 1	1.1	S_TWN	F	0:08:01.194-0:08:01.460	IT2	0.0501258	8	0.187784
Trial 1	1.1	S_TWN	F	0:08:01.460-0:08:01.726	IT2	0.0375932	8	0.140833
Trial 1	1.1	S_TWN	F	0:08:01.726-0:08:01.992	IT2	0.0461987	8	0.173071
Trial 1	1.1	S_TWN	F	0:08:01.992-0:08:02.258	IT2	0.0236342	8	0.08854
Trial 1	1.1	S_TWN	F	0:08:02.258-0:08:02.524	IT2	0.0491674	8	0.184195
Trial 1	1.1	S_TWN	F	0:08:02.524-0:08:02.790	IT2	0.0346414	8	0.129775
Trial 1	1.1	S_TWN	F	0:08:02.790-0:08:03.056	IT2	0.0561633	8	0.210402
Trial 1	1.1	S_TWN	F	0:08:03.056-0:08:03.322	IT2	0.0204167	8	0.0764863
Trial 1	1.1	S_TWN	F	0:08:03.322-0:08:03.588	IT2	0.0639561	8	0.239595
Trial 1	1.1	S_TWN	F	0:08:03.588-0:08:03.854	IT2	0.0546234	8	0.204634
Trial 1	1.1	S_TWN	F	0:08:03.854-0:08:04.120	IT2	0.0801108	8	0.300113
Trial 1	1.1	S_TWN	F	0:08:04.120-0:08:04.386	IT2	0.045604	8	0.170845
Trial 1	1.1	S_TWN	F	0:08:04.386-0:08:04.652	IT2	0.0247607	8	0.0927595
Trial 1	1.1	S_TWN	F	0:08:04.652-0:08:04.918	IT2	0.0354781	7	0.151896
Trial 1	1.1	S_TWN	F	0:08:04.918-0:08:05.184	IT2	0.0132209	8	0.049529
Trial 1	1.1	S_TWN	F	0:08:05.184-0:08:05.450	IT2	0.0280256	8	0.104992
Trial 1	1.1	S_TWN	F	0:08:05.450-0:08:05.716	IT2	0.0534333	8	0.200174
Trial 1	1.1	S_TWN	F	0:08:05.716-0:08:05.982	IT2	0.0710167	8	0.266046
Trial 1	1.1	S_TWN	F	0:08:05.982-0:08:06.248	IT2	0.0785263	8	0.294179
Trial 1	1.1	S_TWN	F	0:08:06.248-0:08:06.514	IT2	0.037441	8	0.140263
Trial 1	1.1	S_TWN	F	0:08:06.514-0:08:06.780	IT2	0.0465614	8	0.174431
Trial 1	1.1	S_TWN	F	0:08:06.780-0:08:07.046	IT2	0.0209577	8	0.0785125
Trial 1	1.1	S_TWN	F	0:08:07.046-0:08:07.312	IT2	0.0278265	8	0.104244
Trial 1	1.1	S_TWN	F	0:08:07.312-0:08:07.578	IT2	0.00666021	8	0.0249508
Trial 1	1.1	S_TWN	F	0:08:07.578-0:08:07.844	IT2	0.0407584	8	0.152692
Trial 1	1.1	S_TWN	F	0:08:07.844-0:08:08.110	IT2	0.0265849	8	0.0995938
Trial 1	1.1	S_TWN	F	0:08:08.110-0:08:08.376	IT2	0.0563855	8	0.211233
Trial 1	1.1	S_TWN	F	0:08:08.376-0:08:08.642	IT2	0.0366125	8	0.137161
Trial 1	1.1	S_TWN	F	0:08:08.642-0:08:08.908	IT2	0.0359649	8	0.134733
Trial 1	1.1	S_TWN	F	0:08:08.908-0:08:09.174	IT2	0.0375313	8	0.140601
Trial 1	1.1	S_TWN	F	0:08:09.174-0:08:09.440	IT2	0.056148	8	0.210344
Trial 1	1.1	S_TWN	F	0:08:09.440-0:08:09.706	IT2	0.0761407	8	0.285241
Trial 1	1.1	S_TWN	F	0:08:09.706-0:08:09.972	IT2	0.0281908	8	0.10561
Trial 1	1.1	S_TWN	F	0:08:09.972-0:08:10.238	IT2	0.0992059	8	0.371649
Trial 1	1.1	S_TWN	F	0:08:10.238-0:08:10.504	IT2	0.0237056	8	0.088807
Trial 1	1.1	S_TWN	F	0:08:10.504-0:08:10.770	IT2	0.0715543	8	0.26806
Trial 1	1.1	S_TWN	F	0:08:10.770-0:08:11.036	IT2	0.0485914	8	0.182035
Trial 1	1.1	S_TWN	F	0:08:11.036-0:08:11.302	IT2	0.0455731	8	0.170729
Trial 1	1.1	S_TWN	F	0:08:11.302-0:08:11.568	IT2	0.0429957	8	0.161073
Trial 1	1.1	S_TWN	F	0:08:11.568-0:08:11.834	IT2	0.0362227	8	0.1357
Trial 1	1.1	S_TWN	F	0:08:11.834-0:08:12.100	IT2	0.0485794	8	0.181991
Trial 1	1.1	S_TWN	F	0:08:12.100-0:08:12.366	IT2	0.026021	8	0.0974807
Trial 1	1.1	S_TWN	F	0:08:12.366-0:08:12.632	IT2	0.0595886	8	0.223233
Trial 1	1.1	S_TWN	F	0:08:12.632-0:08:12.898	IT2	0.0299531	8	0.112212
Trial 1	1.1	S_TWN	F	0:08:12.898-0:08:13.164	IT2	0.0501066	8	0.187711
Trial 1	1.1	S_TWN	F	0:08:13.164-0:08:13.430	IT2	0.0312237	8	0.116972
Trial 1	1.1	S_TWN	F	0:08:13.430-0:08:13.696	IT2	0.0341859	8	0.128068
Trial 1	1.1	S_TWN	F	0:08:13.696-0:08:13.962	IT2	0.0540975	8	0.202663
Trial 1	1.1	S_TWN	F	0:08:13.962-0:08:14.228	IT2	0.0237358	8	0.0889203
Trial 1	1.1	S_TWN	F	0:08:14.228-0:08:14.494	IT2	0.0629603	7	0.269561
Trial 1	1.1	S_TWN	F	0:08:14.494-0:08:14.760	IT2	0.0308819	8	0.115692
Trial 1	1.1	S_TWN	F	0:08:14.760-0:08:15.026	IT2	0.0656503	8	0.245943
Trial 1	1.1	S_TWN	F	0:08:15.026-0:08:15.292	IT2	0.0305868	8	0.114586
Trial 1	1.1	S_TWN	F	0:08:15.292-0:08:15.558	IT2	0.0881122	8	0.330089
Trial 1	1.1	S_TWN	F	0:08:15.558-0:08:15.824	IT2	0.0665899	8	0.249463
Trial 1	1.1	S_TWN	F	0:08:15.824-0:08:16.090	IT2	0.0566717	8	0.212307
Trial 1	1.1	S_TWN	F	0:08:16.090-0:08:16.356	IT2	0.0282477	8	0.105822
Trial 1	1.1	S_TWN	F	0:08:16.356-0:08:16.622	IT2	0.0198624	8	0.0744096
Trial 1	1.1	S_TWN	F	0:08:16.622-0:08:16.888	IT2	0.0497798	8	0.186487
Trial 1	1.1	S_TWN	F	0:08:16.888-0:08:17.154	IT2	0.0390984	8	0.146473
Trial 1	1.1	S_TWN	F	0:08:17.154-0:08:17.420	IT2	0.0787764	8	0.295118
Trial 1	1.1	S_TWN	F	0:08:17.420-0:08:17.686	IT2	0.0189728	8	0.0710774
Trial 1	1.1	S_TWN	F	0:08:17.686-0:08:17.952	IT2	0.0335836	8	0.125812
Trial 1	1.1	S_TWN	F	0:08:17.952-0:08:18.218	IT2	0.0496901	8	0.186153
Trial 1	1.1	S_TWN	F	0:08:18.218-0:08:18.484	IT2	0.049776	8	0.186475
Trial 1	1.1	S_TWN	F	0:08:18.484-0:08:18.750	IT2	0.0452885	8	0.169661
Trial 1	1.1	S_TWN	F	0:08:18.750-0:08:19.016	IT2	0.0268466	8	0.100575
Trial 1	1.1	S_TWN	F	0:08:19.016-0:08:19.282	IT2	0.0697504	8	0.261301
Trial 1	1.1	S_TWN	F	0:08:19.282-0:08:19.548	IT2	0.0124659	8	0.0467002
Trial 1	1.1	S_TWN	F	0:08:19.548-0:08:19.814	IT2	0.0698537	8	0.261689
Trial 1	1.1	S_TWN	F	0:08:19.814-0:08:20.080	IT2	0.0286879	8	0.107473
Trial 1	1.1	S_TWN	F	0:08:20.080-0:08:20.346	IT2	0.0473065	8	0.177222
Trial 1	1.1	S_TWN	F	0:08:20.346-0:08:20.612	IT2	0.055553	8	0.208115
Trial 1	1.1	S_TWN	F	0:08:20.612-0:08:20.878	IT2	0.0219419	8	0.0822001
Trial 1	1.1	S_TWN	F	0:08:20.878-0:08:21.144	IT2	0.0829382	8	0.310707
Trial 1	1.1	S_TWN	F	0:08:21.144-0:08:21.410	IT2	0.0346644	8	0.129862
Trial 1	1.1	S_TWN	F	0:08:21.410-0:08:21.676	IT2	0.0521498	8	0.195365
Trial 1	1.1	S_TWN	F	0:08:21.676-0:08:21.942	IT2	0.0181897	8	0.0681429
Trial 1	1.1	S_TWN	F	0:08:21.942-0:08:22.208	IT2	0.101307	8	0.379519
Trial 1	1.1	S_TWN	F	0:08:22.208-0:08:22.474	IT2	0.0663767	8	0.248663
Trial 1	1.1	S_TWN	F	0:08:22.474-0:08:22.740	IT2	0.0612914	8	0.229613
Trial 1	1.1	S_TWN	F	0:08:22.740-0:08:23.006	IT2	0.0281773	8	0.10556
Trial 1	1.1	S_TWN	F	0:08:23.006-0:08:23.272	IT2	0.0107301	8	0.0401976
Trial 1	1.1	S_TWN	F	0:08:23.272-0:08:23.538	IT2	0.0334882	8	0.125456
Trial 1	1.1	S_TWN	F	0:08:23.538-0:08:23.804	IT2	0.0344547	8	0.129076
Trial 1	1.1	S_TWN	F	0:08:23.804-0:08:24.070	IT2	0.0840075	7	0.359671
Trial 1	1.1	S_TWN	F	0:08:24.070-0:08:24.336	IT2	0.0617315	8	0.231262
Trial 1	1.1	S_TWN	F	0:08:24.336-0:08:24.602	IT2	0.0619239	8	0.231981
Trial 1	1.1	S_TWN	F	0:08:24.602-0:08:24.868	IT2	0.0433231	8	0.162299
Trial 1	1.1	S_TWN	F	0:08:24.868-0:08:25.134	IT2	0.0557439	8	0.20883
Trial 1	1.1	S_TWN	F	0:08:25.134-0:08:25.400	IT2	0.0690802	8	0.258792
Trial 1	1.1	S_TWN	F	0:08:25.400-0:08:25.666	IT2	0.0515235	8	0.193021
Trial 1	1.1	S_TWN	F	0:08:25.666-0:08:25.932	IT2	0.0527661	8	0.197674
Trial 1	1.1	S_TWN	F	0:08:25.932-0:08:26.198	IT2	0.0223073	8	0.0835695
Trial 1	1.1	S_TWN	F	0:08:26.198-0:08:26.464	IT2	0.0685645	8	0.25686
Trial 1	1.1	S_TWN	F	0:08:26.464-0:08:26.730	IT2	0.0479402	8	0.179597
Trial 1	1.1	S_TWN	F	0:08:26.730-0:08:26.996	IT2	0.0434692	8	0.162846
Trial 1	1.1	S_TWN	F	0:08:26.996-0:08:27.262	IT2	0.0307405	8	0.115161
Trial 1	1.1	S_TWN	F	0:08:27.262-0:08:27.528	IT2	0.0437112	8	0.163752
Trial 1	1.1	S_TWN	F	0:08:27.528-0:08:27.794	IT2	0.0922578	8	0.345621
Trial 1	1.1	S_TWN	F	0:08:27.794-0:08:28.060	IT2	0.0679036	8	0.254382
Trial 1	1.1	S_TWN	F	0:08:28.060-0:08:28.326	IT2	0.0640362	8	0.239896
Trial 1	1.1	S_TWN	F	0:08:28.326-0:08:28.592	IT2	0.0197579	8	0.074018
Trial 1	1.1	S_TWN	F	0:08:28.592-0:08:28.858	IT2	0.0478196	8	0.179143
Trial 1	1.1	S_TWN	F	0:08:28.858-0:08:29.124	IT2	0.0254921	8	0.0955003
Trial 1	1.1	S_TWN	F	0:08:29.124-0:08:29.390	IT2	0.0349184	8	0.130813
Trial 1	1.1	S_TWN	F	0:08:29.390-0:08:29.656	IT2	0.0712951	8	0.26709
Trial 1	1.1	S_TWN	F	0:08:29.656-0:08:29.922	IT2	0.074836	8	0.280352
Trial 1	1.1	S_TWN	F	0:08:29.922-0:08:30.188	IT2	0.0386327	8	0.144728
Trial 1	1.1	S_TWN	F	0:08:30.188-0:08:30.454	IT2	0.035915	8	0.134547
Trial 1	1.1	S_TWN	F	0:08:30.454-0:08:30.720	IT2	0.0691834	8	0.259177
Trial 1	1.1	S_TWN	F	0:08:30.720-0:08:30.986	IT2	0.0138756	8	0.0519813
Trial 1	1.1	S_TWN	F	0:08:30.986-0:08:31.252	IT2	0.031687	8	0.118707
Trial 1	1.1	S_TWN	F	0:08:31.252-0:08:31.518	IT2	0.0123213	8	0.0461588
Trial 1	1.1	S_TWN	F	0:08:31.518-0:08:31.784	IT2	0.0578837	8	0.216848
Trial 1	1.1	S_TWN	F	0:08:31.784-0:08:32.050	IT2	0.0760694	8	0.284975
Trial 1	1.1	S_TWN	F	0:08:32.050-0:08:32.316	IT2	0.0537689	8	0.201432
Trial 1	1.1	S_TWN	F	0:08:32.316-0:08:32.582	IT2	0.0492055	8	0.184335
Trial 1	1.1	S_TWN	F	0:08:32.582-0:08:32.848	IT2	0.0518166	8	0.194118
Trial 1	1.1	S_TWN	F	0:08:32.848-0:08:33.114	IT2	0.067473	8	0.252771
Trial 1	1.1	S_TWN	F	0:08:33.114-0:08:33.380	IT2	0.0181235	7	0.0775947
Trial 1	1.1	S_TWN	F	0:08:33.380-0:08:33.646	IT2	0.083217	8	0.311751
Trial 1	1.1	S_TWN	F	0:08:33.646-0:08:33.912	IT2	0.0603066	8	0.225925
Trial 1	1.1	S_TWN	F	0:08:33.912-0:08:34.178	IT2	0.0831153	8	0.311368
Trial 1	1.1	S_TWN	F	0:08:34.178-0:08:34.444	IT2	0.0941259	8	0.35262
Trial 1	1.1	S_TWN	F	0:08:34.444-0:08:34.710	IT2	0.0359027	8	0.1345
Trial 1	1.1	S_TWN	F	0:08:34.710-0:08:34.976	IT2	0.0459012	8	0.171957
Trial 1	1.1	S_TWN	F	0:08:34.976-0:08:35.242	IT2	0.041215	8	0.154402
Trial 1	1.1	S_TWN	F	0:08:35.242-0:08:35.508	IT2	0.0360849	8	0.135183
Trial 1	1.1	S_TWN	F	0:08:35.508-0:08:35.774	IT2	0.024279	8	0.0909557
Trial 1	1.1	S_TWN	F	0:08:35.774-0:08:36.040	IT2	0.0602644	8	0.225765
Trial 1	1.1	S_TWN	F	0:08:36.040-0:08:36.306	IT2	0.0380313	8	0.142475
Trial 1	1.1	S_TWN	F	0:08:36.306-0:08:36.572	IT2	0.0710933	8	0.266334
Trial 1	1.1	S_TWN	F	0:08:36.572-0:08:36.838	IT2	0.041352	8	0.154915
Trial 1	1.1	S_TWN	F	0:08:36.838-0:08:37.104	IT2	0.00761738	8	0.0285365
Trial 1	1.1	S_TWN	F	0:08:37.104-0:08:37.370	IT2	0.0302252	8	0.113231
Trial 1	1.1	S_TWN	F	0:08:37.370-0:08:37.636	IT2	0.0103798	8	0.0388855
Trial 1	1.1	S_TWN	F	0:08:37.636-0:08:37.902	IT2	0.04974	8	0.186338
Trial 1	1.1	S_TWN	F	0:08:37.902-0:08:38.168	IT2	0.0490347	8	0.183696
Trial 1	1.1	S_TWN	F	0:08:38.168-0:08:38.434	IT2	0.122901	8	0.460417
Trial 1	1.1	S_TWN	F	0:08:38.434-0:08:38.700	IT2	0.040843	8	0.153008
Trial 1	1.1	S_TWN	F	0:08:38.700-0:08:38.966	IT2	0.0386286	8	0.144712
Trial 1	1.1	S_TWN	F	0:08:38.966-0:08:39.232	IT2	0.0572779	8	0.214578
Trial 1	1.1	S_TWN	F	0:08:39.232-0:08:39.498	IT2	0.0353319	8	0.132362
Trial 1	1.1	S_TWN	F	0:08:39.498-0:08:39.764	IT2	0.0276036	8	0.10341
Trial 1	1.1	S_TWN	F	0:08:39.764-0:08:40.030	IT2	0.0275451	8	0.10319
Trial 1	1.1	S_TWN	F	0:08:40.030-0:08:40.296	IT2	0.0685224	8	0.256701
Trial 1	1.1	S_TWN	F	0:08:40.296-0:08:40.562	IT2	0.0551662	8	0.206666
Trial 1	1.1	S_TWN	F	0:08:40.562-0:08:40.828	IT2	0.0719952	8	0.26971
Trial 1	1.1	S_TWN	F	0:08:40.828-0:08:41.094	IT2	0.0294593	8	0.110362
Trial 1	1.1	S_TWN	F	0:08:41.094-0:08:41.360	IT2	0.0369268	8	0.138338
Trial 1	1.1	S_TWN	F	0:08:41.360-0:08:41.626	IT2	0.0344361	8	0.129006
Trial 1	1.1	S_TWN	F	0:08:41.626-0:08:41.892	IT2	0.0349253	8	0.13084
Trial 1	1.1	S_TWN	F	0:08:41.892-0:08:42.158	IT2	0.0854581	8	0.320146
Trial 1	1.1	S_TWN	F	0:08:42.158-0:08:42.424	IT2	0.0446539	8	0.167286
Trial 1	1.1	S_TWN	F	0:08:42.424-0:08:42.690	IT2	0.058419	8	0.218851
Trial 1	1.1	S_TWN	F	0:08:42.690-0:08:42.956	IT2	0.0246899	7	0.105708
Trial 1	1.1	S_TWN	F	0:08:42.956-0:08:43.222	IT2	0.0683494	8	0.256052
Trial 1	1.1	S_TWN	F	0:08:43.222-0:08:43.488	IT2	0.0568908	8	0.213128
Trial 1	1.1	S_TWN	F	0:08:43.488-0:08:43.754	IT2	0.0369829	8	0.138547
Trial 1	1.1	S_TWN	F	0:08:43.754-0:08:44.020	IT2	0.0281268	8	0.105371
Trial 1	1.1	S_TWN	F	0:08:44.020-0:08:44.286	IT2	0.0466355	8	0.174709
Trial 1	1.1	S_TWN	F	0:08:44.286-0:08:44.552	IT2	0.0506095	8	0.189597
Trial 1	1.1	S_TWN	F	0:08:44.552-0:08:44.818	IT2	0.0198735	8	0.0744518
Trial 1	1.1	S_TWN	F	0:08:44.818-0:08:45.084	IT2	0.0669168	8	0.250685
Trial 1	1.1	S_TWN	F	0:08:45.084-0:08:45.350	IT2	0.0378177	8	0.141675
Trial 1	1.1	S_TWN	F	0:08:45.350-0:08:45.616	IT2	0.0689981	8	0.258483
Trial 1	1.1	S_TWN	F	0:08:45.616-0:08:45.882	IT2	0.0558269	8	0.209141
Trial 1	1.1	S_TWN	F	0:08:45.882-0:08:46.148	IT2	0.0475354	8	0.178079
Trial 1	1.1	S_TWN	F	0:08:46.148-0:08:46.414	IT2	0.03367	8	0.126136
Trial 1	1.1	S_TWN	F	0:08:46.414-0:08:46.680	IT2	0.0263431	8	0.0986878
Trial 1	1.1	S_TWN	F	0:08:46.680-0:08:46.946	IT2	0.0899012	8	0.336792
Trial 1	1.1	S_TWN	F	0:08:46.946-0:08:47.212	IT2	0.0810653	8	0.303689
Trial 1	1.1	S_TWN	F	0:08:47.212-0:08:47.478	IT2	0.0799078	8	0.299355
Trial 1	1.1	S_TWN	F	0:08:47.478-0:08:47.744	IT2	0.060911	8	0.228186
Trial 1	1.1	S_TWN	F	0:08:47.744-0:08:48.010	IT2	0.0867365	8	0.324937
Trial 1	1.1	S_TWN	F	0:08:48.010-0:08:48.276	IT2	0.138673	8	0.519502
Trial 1	1.1	S_TWN	F	0:08:48.276-0:08:48.542	IT2	0.0294394	8	0.110287
Trial 1	1.1	S_TWN	F	0:08:48.542-0:08:48.808	IT2	0.0346302	8	0.129734
Trial 1	1.1	S_TWN	F	0:08:48.808-0:08:49.074	IT2	0.0223717	8	0.0838099
Trial 1	1.1	S_TWN	F	0:08:49.074-0:08:49.340	IT2	0.0610224	8	0.228605
Trial 1	1.1	S_TWN	F	0:08:49.340-0:08:49.606	IT2	0.0073653	8	0.0275922
Trial 1	1.1	S_TWN	F	0:08:49.606-0:08:49.872	IT2	0.102252	8	0.383064
Trial 1	1.1	S_TWN	F	0:08:49.872-0:08:50.138	IT2	0.0939878	8	0.352102
Trial 1	1.1	S_TWN	F	0:08:50.138-0:08:50.404	IT2	0.114329	8	0.428306
Trial 1	1.1	S_TWN	F	0:08:50.404-0:08:50.670	IT2	0.0558657	8	0.209287
Trial 1	1.1	S_TWN	F	0:08:50.670-0:08:50.936	IT2	0.0380119	8	0.142402
[truncated: 122,388 more rows]

## Sheet: Day 3
Raw velocity data, extracted via ethovision, which is fed to R source code 1 to detect and extract darts, and to produce velocity traces
Showing Data from Test Day 3 for all animals in Experiment 2
Used to calculate Darts/minute as seen in Figure 4 and Figure 4-figure supplement 1
Used to produce velocity traces as seen in Figure 5
Trial	Animal	Group	Sex	TimeStamp	StimPeriod	Distance_cm	Samples	Velocity
Trial 1	1.1	S_TWN	F	Start-0:00:00.266	BL	-	0	-
Trial 1	1.1	S_TWN	F	0:00:00.266-0:00:00.532	BL	-	0	-
Trial 1	1.1	S_TWN	F	0:00:00.532-0:00:00.798	BL	-	0	-
Trial 1	1.1	S_TWN	F	0:00:00.798-0:00:01.064	BL	-	0	-
Trial 1	1.1	S_TWN	F	0:00:01.064-0:00:01.330	BL	-	0	-
Trial 1	1.1	S_TWN	F	0:00:01.330-0:00:01.596	BL	-	0	-
Trial 1	1.1	S_TWN	F	0:00:01.596-0:00:01.862	BL	-	0	-
Trial 1	1.1	S_TWN	F	0:00:01.862-0:00:02.128	BL	-	0	-
Trial 1	1.1	S_TWN	F	0:00:02.128-0:00:02.394	BL	-	0	-
Trial 1	1.1	S_TWN	F	0:00:02.394-0:00:02.660	BL	-	0	-
Trial 1	1.1	S_TWN	F	0:00:02.660-0:00:02.926	BL	-	0	-
Trial 1	1.1	S_TWN	F	0:00:02.926-0:00:03.192	BL	-	0	-
Trial 1	1.1	S_TWN	F	0:00:03.192-0:00:03.458	BL	-	0	-
Trial 1	1.1	S_TWN	F	0:00:03.458-0:00:03.724	BL	-	0	-
Trial 1	1.1	S_TWN	F	0:00:03.724-0:00:03.990	BL	-	0	-
Trial 1	1.1	S_TWN	F	0:00:03.990-0:00:04.256	BL	-	0	-
Trial 1	1.1	S_TWN	F	0:00:04.256-0:00:04.522	BL	-	0	-
Trial 1	1.1	S_TWN	F	0:00:04.522-0:00:04.788	BL	-	0	-
Trial 1	1.1	S_TWN	F	0:00:04.788-0:00:05.054	BL	-	0	-
Trial 1	1.1	S_TWN	F	0:00:05.054-0:00:05.320	BL	-	0	-
Trial 1	1.1	S_TWN	F	0:00:05.320-0:00:05.586	BL	-	0	-
Trial 1	1.1	S_TWN	F	0:00:05.586-0:00:05.852	BL	-	0	-
Trial 1	1.1	S_TWN	F	0:00:05.852-0:00:06.118	BL	-	0	-
Trial 1	1.1	S_TWN	F	0:00:06.118-0:00:06.384	BL	-	0	-
Trial 1	1.1	S_TWN	F	0:00:06.384-0:00:06.650	BL	-	0	-
Trial 1	1.1	S_TWN	F	0:00:06.650-0:00:06.916	BL	-	0	-
Trial 1	1.1	S_TWN	F	0:00:06.916-0:00:07.182	BL	-	0	-
Trial 1	1.1	S_TWN	F	0:00:07.182-0:00:07.448	BL	-	0	-
Trial 1	1.1	S_TWN	F	0:00:07.448-0:00:07.714	BL	-	0	-
Trial 1	1.1	S_TWN	F	0:00:07.714-0:00:07.980	BL	-	0	-
Trial 1	1.1	S_TWN	F	0:00:07.980-0:00:08.246	BL	-	0	-
Trial 1	1.1	S_TWN	F	0:00:08.246-0:00:08.512	BL	-	0	-
Trial 1	1.1	S_TWN	F	0:00:08.512-0:00:08.778	BL	-	0	-
Trial 1	1.1	S_TWN	F	0:00:08.778-0:00:09.044	BL	-	0	-
Trial 1	1.1	S_TWN	F	0:00:09.044-0:00:09.310	BL	-	0	-
Trial 1	1.1	S_TWN	F	0:00:09.310-0:00:09.576	BL	-	0	-
Trial 1	1.1	S_TWN	F	0:00:09.576-0:00:09.842	BL	-	0	-
Trial 1	1.1	S_TWN	F	0:00:09.842-0:00:10.108	BL	-	0	-
Trial 1	1.1	S_TWN	F	0:00:10.108-0:00:10.374	BL	-	0	-
Trial 1	1.1	S_TWN	F	0:00:10.374-0:00:10.640	BL	-	0	-
Trial 1	1.1	S_TWN	F	0:00:10.640-0:00:10.906	BL	-	0	-
Trial 1	1.1	S_TWN	F	0:00:10.906-0:00:11.172	BL	-	0	-
Trial 1	1.1	S_TWN	F	0:00:11.172-0:00:11.438	BL	-	0	-
Trial 1	1.1	S_TWN	F	0:00:11.438-0:00:11.704	BL	-	0	-
Trial 1	1.1	S_TWN	F	0:00:11.704-0:00:11.970	BL	-	0	-
Trial 1	1.1	S_TWN	F	0:00:11.970-0:00:12.236	BL	-	0	-
Trial 1	1.1	S_TWN	F	0:00:12.236-0:00:12.502	BL	-	0	-
Trial 1	1.1	S_TWN	F	0:00:12.502-0:00:12.768	BL	-	0	-
Trial 1	1.1	S_TWN	F	0:00:12.768-0:00:13.034	BL	-	0	-
Trial 1	1.1	S_TWN	F	0:00:13.034-0:00:13.300	BL	-	0	-
Trial 1	1.1	S_TWN	F	0:00:13.300-0:00:13.566	BL	-	0	-
Trial 1	1.1	S_TWN	F	0:00:13.566-0:00:13.832	BL	-	0	-
Trial 1	1.1	S_TWN	F	0:00:13.832-0:00:14.098	BL	-	0	-
Trial 1	1.1	S_TWN	F	0:00:14.098-0:00:14.364	BL	-	0	-
Trial 1	1.1	S_TWN	F	0:00:14.364-0:00:14.630	BL	-	0	-
Trial 1	1.1	S_TWN	F	0:00:14.630-0:00:14.896	BL	-	0	-
Trial 1	1.1	S_TWN	F	0:00:14.896-0:00:15.162	BL	-	0	-
Trial 1	1.1	S_TWN	F	0:00:15.162-0:00:15.428	BL	-	0	-
Trial 1	1.1	S_TWN	F	0:00:15.428-0:00:15.694	BL	-	0	-
Trial 1	1.1	S_TWN	F	0:00:15.694-0:00:15.960	BL	-	0	-
Trial 1	1.1	S_TWN	F	0:00:15.960-0:00:16.226	BL	-	0	-
Trial 1	1.1	S_TWN	F	0:00:16.226-0:00:16.492	BL	-	0	-
Trial 1	1.1	S_TWN	F	0:00:16.492-0:00:16.758	BL	-	0	-
Trial 1	1.1	S_TWN	F	0:00:16.758-0:00:17.024	BL	-	0	-
Trial 1	1.1	S_TWN	F	0:00:17.024-0:00:17.290	BL	-	0	-
Trial 1	1.1	S_TWN	F	0:00:17.290-0:00:17.556	BL	-	0	-
Trial 1	1.1	S_TWN	F	0:00:17.556-0:00:17.822	BL	-	0	-
Trial 1	1.1	S_TWN	F	0:00:17.822-0:00:18.088	BL	-	0	-
Trial 1	1.1	S_TWN	F	0:00:18.088-0:00:18.354	BL	-	0	-
Trial 1	1.1	S_TWN	F	0:00:18.354-0:00:18.620	BL	-	0	-
Trial 1	1.1	S_TWN	F	0:00:18.620-0:00:18.886	BL	-	0	-
Trial 1	1.1	S_TWN	F	0:00:18.886-0:00:19.152	BL	-	0	-
Trial 1	1.1	S_TWN	F	0:00:19.152-0:00:19.418	BL	-	0	-
Trial 1	1.1	S_TWN	F	0:00:19.418-0:00:19.684	BL	-	0	-
Trial 1	1.1	S_TWN	F	0:00:19.684-0:00:19.950	BL	-	0	-
Trial 1	1.1	S_TWN	F	0:00:19.950-0:00:20.216	BL	-	0	-
Trial 1	1.1	S_TWN	F	0:00:20.216-0:00:20.482	BL	-	0	-
Trial 1	1.1	S_TWN	F	0:00:20.482-0:00:20.748	BL	-	0	-
Trial 1	1.1	S_TWN	F	0:00:20.748-0:00:21.014	BL	-	0	-
Trial 1	1.1	S_TWN	F	0:00:21.014-0:00:21.280	BL	-	0	-
Trial 1	1.1	S_TWN	F	0:00:21.280-0:00:21.546	BL	-	0	-
Trial 1	1.1	S_TWN	F	0:00:21.546-0:00:21.812	BL	-	0	-
Trial 1	1.1	S_TWN	F	0:00:21.812-0:00:22.078	BL	-	0	-
Trial 1	1.1	S_TWN	F	0:00:22.078-0:00:22.344	BL	-	0	-
Trial 1	1.1	S_TWN	F	0:00:22.344-0:00:22.610	BL	-	0	-
Trial 1	1.1	S_TWN	F	0:00:22.610-0:00:22.876	BL	-	0	-
Trial 1	1.1	S_TWN	F	0:00:22.876-0:00:23.142	BL	-	0	-
Trial 1	1.1	S_TWN	F	0:00:23.142-0:00:23.408	BL	-	0	-
Trial 1	1.1	S_TWN	F	0:00:23.408-0:00:23.674	BL	-	0	-
Trial 1	1.1	S_TWN	F	0:00:23.674-0:00:23.940	BL	-	0	-
Trial 1	1.1	S_TWN	F	0:00:23.940-0:00:24.206	BL	-	0	-
Trial 1	1.1	S_TWN	F	0:00:24.206-0:00:24.472	BL	-	0	-
Trial 1	1.1	S_TWN	F	0:00:24.472-0:00:24.738	BL	-	0	-
Trial 1	1.1	S_TWN	F	0:00:24.738-0:00:25.004	BL	-	0	-
Trial 1	1.1	S_TWN	F	0:00:25.004-0:00:25.270	BL	-	0	-
Trial 1	1.1	S_TWN	F	0:00:25.270-0:00:25.536	BL	-	0	-
Trial 1	1.1	S_TWN	F	0:00:25.536-0:00:25.802	BL	-	0	-
Trial 1	1.1	S_TWN	F	0:00:25.802-0:00:26.068	BL	-	0	-
Trial 1	1.1	S_TWN	F	0:00:26.068-0:00:26.334	BL	-	0	-
Trial 1	1.1	S_TWN	F	0:00:26.334-0:00:26.600	BL	-	0	-
Trial 1	1.1	S_TWN	F	0:00:26.600-0:00:26.866	BL	-	0	-
Trial 1	1.1	S_TWN	F	0:00:26.866-0:00:27.132	BL	-	0	-
Trial 1	1.1	S_TWN	F	0:00:27.132-0:00:27.398	BL	-	0	-
Trial 1	1.1	S_TWN	F	0:00:27.398-0:00:27.664	BL	-	0	-
Trial 1	1.1	S_TWN	F	0:00:27.664-0:00:27.930	BL	-	0	-
Trial 1	1.1	S_TWN	F	0:00:27.930-0:00:28.196	BL	-	0	-
Trial 1	1.1	S_TWN	F	0:00:28.196-0:00:28.462	BL	-	0	-
Trial 1	1.1	S_TWN	F	0:00:28.462-0:00:28.728	BL	-	0	-
Trial 1	1.1	S_TWN	F	0:00:28.728-0:00:28.994	BL	-	0	-
Trial 1	1.1	S_TWN	F	0:00:28.994-0:00:29.260	BL	-	0	-
Trial 1	1.1	S_TWN	F	0:00:29.260-0:00:29.526	BL	-	0	-
Trial 1	1.1	S_TWN	F	0:00:29.526-0:00:29.792	BL	-	0	-
Trial 1	1.1	S_TWN	F	0:00:29.792-0:00:30.058	BL	-	0	-
Trial 1	1.1	S_TWN	F	0:00:30.058-0:00:30.324	BL	-	0	-
Trial 1	1.1	S_TWN	F	0:00:30.324-0:00:30.590	BL	-	0	-
Trial 1	1.1	S_TWN	F	0:00:30.590-0:00:30.856	BL	-	0	-
Trial 1	1.1	S_TWN	F	0:00:30.856-0:00:31.122	BL	-	0	-
Trial 1	1.1	S_TWN	F	0:00:31.122-0:00:31.388	BL	-	0	-
Trial 1	1.1	S_TWN	F	0:00:31.388-0:00:31.654	BL	-	0	-
Trial 1	1.1	S_TWN	F	0:00:31.654-0:00:31.920	BL	-	0	-
Trial 1	1.1	S_TWN	F	0:00:31.920-0:00:32.186	BL	-	0	-
Trial 1	1.1	S_TWN	F	0:00:32.186-0:00:32.452	BL	-	0	-
Trial 1	1.1	S_TWN	F	0:00:32.452-0:00:32.718	BL	-	0	-
Trial 1	1.1	S_TWN	F	0:00:32.718-0:00:32.984	BL	-	0	-
Trial 1	1.1	S_TWN	F	0:00:32.984-0:00:33.250	BL	-	0	-
Trial 1	1.1	S_TWN	F	0:00:33.250-0:00:33.516	BL	-	0	-
Trial 1	1.1	S_TWN	F	0:00:33.516-0:00:33.782	BL	-	0	-
Trial 1	1.1	S_TWN	F	0:00:33.782-0:00:34.048	BL	-	0	-
Trial 1	1.1	S_TWN	F	0:00:34.048-0:00:34.314	BL	-	0	-
Trial 1	1.1	S_TWN	F	0:00:34.314-0:00:34.580	BL	-	0	-
Trial 1	1.1	S_TWN	F	0:00:34.580-0:00:34.846	BL	-	0	-
Trial 1	1.1	S_TWN	F	0:00:34.846-0:00:35.112	BL	-	0	-
Trial 1	1.1	S_TWN	F	0:00:35.112-0:00:35.378	BL	-	0	-
Trial 1	1.1	S_TWN	F	0:00:35.378-0:00:35.644	BL	-	0	-
Trial 1	1.1	S_TWN	F	0:00:35.644-0:00:35.910	BL	-	0	-
Trial 1	1.1	S_TWN	F	0:00:35.910-0:00:36.176	BL	-	0	-
Trial 1	1.1	S_TWN	F	0:00:36.176-0:00:36.442	BL	-	0	-
Trial 1	1.1	S_TWN	F	0:00:36.442-0:00:36.708	BL	-	0	-
Trial 1	1.1	S_TWN	F	0:00:36.708-0:00:36.974	BL	-	0	-
Trial 1	1.1	S_TWN	F	0:00:36.974-0:00:37.240	BL	-	0	-
Trial 1	1.1	S_TWN	F	0:00:37.240-0:00:37.506	BL	-	0	-
Trial 1	1.1	S_TWN	F	0:00:37.506-0:00:37.772	BL	-	0	-
Trial 1	1.1	S_TWN	F	0:00:37.772-0:00:38.038	BL	-	0	-
Trial 1	1.1	S_TWN	F	0:00:38.038-0:00:38.304	BL	-	0	-
Trial 1	1.1	S_TWN	F	0:00:38.304-0:00:38.570	BL	-	0	-
Trial 1	1.1	S_TWN	F	0:00:38.570-0:00:38.836	BL	-	0	-
Trial 1	1.1	S_TWN	F	0:00:38.836-0:00:39.102	BL	-	0	-
Trial 1	1.1	S_TWN	F	0:00:39.102-0:00:39.368	BL	-	0	-
Trial 1	1.1	S_TWN	F	0:00:39.368-0:00:39.634	BL	-	0	-
Trial 1	1.1	S_TWN	F	0:00:39.634-0:00:39.900	BL	-	0	-
Trial 1	1.1	S_TWN	F	0:00:39.900-0:00:40.166	BL	-	0	-
Trial 1	1.1	S_TWN	F	0:00:40.166-0:00:40.432	BL	-	0	-
Trial 1	1.1	S_TWN	F	0:00:40.432-0:00:40.698	BL	-	0	-
Trial 1	1.1	S_TWN	F	0:00:40.698-0:00:40.964	BL	-	0	-
Trial 1	1.1	S_TWN	F	0:00:40.964-0:00:41.230	BL	-	0	-
Trial 1	1.1	S_TWN	F	0:00:41.230-0:00:41.496	BL	-	0	-
Trial 1	1.1	S_TWN	F	0:00:41.496-0:00:41.762	BL	-	0	-
Trial 1	1.1	S_TWN	F	0:00:41.762-0:00:42.028	BL	-	0	-
Trial 1	1.1	S_TWN	F	0:00:42.028-0:00:42.294	BL	-	0	-
Trial 1	1.1	S_TWN	F	0:00:42.294-0:00:42.560	BL	-	0	-
Trial 1	1.1	S_TWN	F	0:00:42.560-0:00:42.826	BL	-	0	-
Trial 1	1.1	S_TWN	F	0:00:42.826-0:00:43.092	BL	-	0	-
Trial 1	1.1	S_TWN	F	0:00:43.092-0:00:43.358	BL	-	0	-
Trial 1	1.1	S_TWN	F	0:00:43.358-0:00:43.624	BL	-	0	-
Trial 1	1.1	S_TWN	F	0:00:43.624-0:00:43.890	BL	-	0	-
Trial 1	1.1	S_TWN	F	0:00:43.890-0:00:44.156	BL	-	0	-
Trial 1	1.1	S_TWN	F	0:00:44.156-0:00:44.422	BL	-	0	-
Trial 1	1.1	S_TWN	F	0:00:44.422-0:00:44.688	BL	-	0	-
Trial 1	1.1	S_TWN	F	0:00:44.688-0:00:44.954	BL	-	0	-
Trial 1	1.1	S_TWN	F	0:00:44.954-0:00:45.220	BL	-	0	-
Trial 1	1.1	S_TWN	F	0:00:45.220-0:00:45.486	BL	-	0	-
Trial 1	1.1	S_TWN	F	0:00:45.486-0:00:45.752	BL	-	0	-
Trial 1	1.1	S_TWN	F	0:00:45.752-0:00:46.018	BL	-	0	-
Trial 1	1.1	S_TWN	F	0:00:46.018-0:00:46.284	BL	-	0	-
Trial 1	1.1	S_TWN	F	0:00:46.284-0:00:46.550	BL	-	0	-
Trial 1	1.1	S_TWN	F	0:00:46.550-0:00:46.816	BL	-	0	-
Trial 1	1.1	S_TWN	F	0:00:46.816-0:00:47.082	BL	-	0	-
Trial 1	1.1	S_TWN	F	0:00:47.082-0:00:47.348	BL	-	0	-
Trial 1	1.1	S_TWN	F	0:00:47.348-0:00:47.614	BL	-	0	-
Trial 1	1.1	S_TWN	F	0:00:47.614-0:00:47.880	BL	-	0	-
Trial 1	1.1	S_TWN	F	0:00:47.880-0:00:48.146	BL	-	0	-
Trial 1	1.1	S_TWN	F	0:00:48.146-0:00:48.412	BL	-	0	-
Trial 1	1.1	S_TWN	F	0:00:48.412-0:00:48.678	BL	-	0	-
Trial 1	1.1	S_TWN	F	0:00:48.678-0:00:48.944	BL	-	0	-
Trial 1	1.1	S_TWN	F	0:00:48.944-0:00:49.210	BL	-	0	-
Trial 1	1.1	S_TWN	F	0:00:49.210-0:00:49.476	BL	-	0	-
Trial 1	1.1	S_TWN	F	0:00:49.476-0:00:49.742	BL	-	0	-
Trial 1	1.1	S_TWN	F	0:00:49.742-0:00:50.008	BL	-	0	-
Trial 1	1.1	S_TWN	F	0:00:50.008-0:00:50.274	BL	-	0	-
Trial 1	1.1	S_TWN	F	0:00:50.274-0:00:50.540	BL	-	0	-
Trial 1	1.1	S_TWN	F	0:00:50.540-0:00:50.806	BL	-	0	-
Trial 1	1.1	S_TWN	F	0:00:50.806-0:00:51.072	BL	-	0	-
Trial 1	1.1	S_TWN	F	0:00:51.072-0:00:51.338	BL	-	0	-
Trial 1	1.1	S_TWN	F	0:00:51.338-0:00:51.604	BL	-	0	-
Trial 1	1.1	S_TWN	F	0:00:51.604-0:00:51.870	BL	-	0	-
Trial 1	1.1	S_TWN	F	0:00:51.870-0:00:52.136	BL	-	0	-
Trial 1	1.1	S_TWN	F	0:00:52.136-0:00:52.402	BL	-	0	-
Trial 1	1.1	S_TWN	F	0:00:52.402-0:00:52.668	BL	-	0	-
Trial 1	1.1	S_TWN	F	0:00:52.668-0:00:52.934	BL	-	0	-
Trial 1	1.1	S_TWN	F	0:00:52.934-0:00:53.200	BL	-	0	-
Trial 1	1.1	S_TWN	F	0:00:53.200-0:00:53.466	BL	-	0	-
Trial 1	1.1	S_TWN	F	0:00:53.466-0:00:53.732	BL	-	0	-
Trial 1	1.1	S_TWN	F	0:00:53.732-0:00:53.998	BL	-	0	-
Trial 1	1.1	S_TWN	F	0:00:53.998-0:00:54.264	BL	-	0	-
Trial 1	1.1	S_TWN	F	0:00:54.264-0:00:54.530	BL	-	0	-
Trial 1	1.1	S_TWN	F	0:00:54.530-0:00:54.796	BL	-	0	-
Trial 1	1.1	S_TWN	F	0:00:54.796-0:00:55.062	BL	-	0	-
Trial 1	1.1	S_TWN	F	0:00:55.062-0:00:55.328	BL	-	0	-
Trial 1	1.1	S_TWN	F	0:00:55.328-0:00:55.594	BL	-	0	-
Trial 1	1.1	S_TWN	F	0:00:55.594-0:00:55.860	BL	-	0	-
Trial 1	1.1	S_TWN	F	0:00:55.860-0:00:56.126	BL	-	0	-
Trial 1	1.1	S_TWN	F	0:00:56.126-0:00:56.392	BL	-	0	-
Trial 1	1.1	S_TWN	F	0:00:56.392-0:00:56.658	BL	-	0	-
Trial 1	1.1	S_TWN	F	0:00:56.658-0:00:56.924	BL	-	0	-
Trial 1	1.1	S_TWN	F	0:00:56.924-0:00:57.190	BL	-	0	-
Trial 1	1.1	S_TWN	F	0:00:57.190-0:00:57.456	BL	-	0	-
Trial 1	1.1	S_TWN	F	0:00:57.456-0:00:57.722	BL	-	0	-
Trial 1	1.1	S_TWN	F	0:00:57.722-0:00:57.988	BL	-	0	-
Trial 1	1.1	S_TWN	F	0:00:57.988-0:00:58.254	BL	-	0	-
Trial 1	1.1	S_TWN	F	0:00:58.254-0:00:58.520	BL	-	0	-
Trial 1	1.1	S_TWN	F	0:00:58.520-0:00:58.786	BL	1.03964	6	5.19299
Trial 1	1.1	S_TWN	F	0:00:58.786-0:00:59.052	BL	0.697981	8	2.61481
Trial 1	1.1	S_TWN	F	0:00:59.052-0:00:59.318	BL	0.128432	8	0.481137
Trial 1	1.1	S_TWN	F	0:00:59.318-0:00:59.584	BL	0.27366	8	1.0252
Trial 1	1.1	S_TWN	F	0:00:59.584-0:00:59.850	BL	0.23737	8	0.889246
Trial 1	1.1	S_TWN	F	0:00:59.850-0:01:00.116	BL	0.238969	8	0.89524
Trial 1	1.1	S_TWN	F	0:01:00.116-0:01:00.382	BL	0.0813603	8	0.304795
Trial 1	1.1	S_TWN	F	0:01:00.382-0:01:00.648	BL	0.235416	8	0.881924
Trial 1	1.1	S_TWN	F	0:01:00.648-0:01:00.914	BL	0.0663391	8	0.248522
Trial 1	1.1	S_TWN	F	0:01:00.914-0:01:01.180	BL	0.0534893	8	0.200384
Trial 1	1.1	S_TWN	F	0:01:01.180-0:01:01.446	BL	0.190986	8	0.715481
Trial 1	1.1	S_TWN	F	0:01:01.446-0:01:01.712	BL	0.0850817	8	0.318736
Trial 1	1.1	S_TWN	F	0:01:01.712-0:01:01.978	BL	0.0703941	8	0.263715
Trial 1	1.1	S_TWN	F	0:01:01.978-0:01:02.244	BL	0.122049	8	0.457226
Trial 1	1.1	S_TWN	F	0:01:02.244-0:01:02.510	BL	0.120138	8	0.450067
Trial 1	1.1	S_TWN	F	0:01:02.510-0:01:02.776	BL	0.158401	8	0.593413
Trial 1	1.1	S_TWN	F	0:01:02.776-0:01:03.042	BL	0.0999994	8	0.374621
Trial 1	1.1	S_TWN	F	0:01:03.042-0:01:03.308	BL	0.148513	8	0.556368
Trial 1	1.1	S_TWN	F	0:01:03.308-0:01:03.574	BL	0.131906	8	0.494154
Trial 1	1.1	S_TWN	F	0:01:03.574-0:01:03.840	BL	0.210815	8	0.789762
Trial 1	1.1	S_TWN	F	0:01:03.840-0:01:04.106	BL	0.219614	8	0.822726
Trial 1	1.1	S_TWN	F	0:01:04.106-0:01:04.372	BL	0.174807	8	0.654867
Trial 1	1.1	S_TWN	F	0:01:04.372-0:01:04.638	BL	0.0742281	8	0.278077
Trial 1	1.1	S_TWN	F	0:01:04.638-0:01:04.904	BL	0.150992	8	0.565657
Trial 1	1.1	S_TWN	F	0:01:04.904-0:01:05.170	BL	0.0691973	8	0.25923
Trial 1	1.1	S_TWN	F	0:01:05.170-0:01:05.436	BL	0.0916718	8	0.343428
Trial 1	1.1	S_TWN	F	0:01:05.436-0:01:05.702	BL	0.397834	8	1.49039
Trial 1	1.1	S_TWN	F	0:01:05.702-0:01:05.968	BL	0.206155	8	0.772313
Trial 1	1.1	S_TWN	F	0:01:05.968-0:01:06.234	BL	0.160263	8	0.600387
Trial 1	1.1	S_TWN	F	0:01:06.234-0:01:06.500	BL	0.188556	8	0.706378
Trial 1	1.1	S_TWN	F	0:01:06.500-0:01:06.766	BL	0.132198	7	0.565993
Trial 1	1.1	S_TWN	F	0:01:06.766-0:01:07.032	BL	0.139449	8	0.522411
Trial 1	1.1	S_TWN	F	0:01:07.032-0:01:07.298	BL	0.194563	8	0.728878
Trial 1	1.1	S_TWN	F	0:01:07.298-0:01:07.564	BL	0.239663	8	0.897836
Trial 1	1.1	S_TWN	F	0:01:07.564-0:01:07.830	BL	0.111423	8	0.417419
Trial 1	1.1	S_TWN	F	0:01:07.830-0:01:08.096	BL	0.168439	8	0.631013
Trial 1	1.1	S_TWN	F	0:01:08.096-0:01:08.362	BL	0.124204	8	0.465299
Trial 1	1.1	S_TWN	F	0:01:08.362-0:01:08.628	BL	0.185529	8	0.695044
Trial 1	1.1	S_TWN	F	0:01:08.628-0:01:08.894	BL	0.20709	8	0.775814
Trial 1	1.1	S_TWN	F	0:01:08.894-0:01:09.160	BL	0.181562	8	0.680177
Trial 1	1.1	S_TWN	F	0:01:09.160-0:01:09.426	BL	0.142469	8	0.533723
Trial 1	1.1	S_TWN	F	0:01:09.426-0:01:09.692	BL	0.0900568	8	0.337377
Trial 1	1.1	S_TWN	F	0:01:09.692-0:01:09.958	BL	0.107833	8	0.403967
Trial 1	1.1	S_TWN	F	0:01:09.958-0:01:10.224	BL	0.0900539	8	0.337364
Trial 1	1.1	S_TWN	F	0:01:10.224-0:01:10.490	BL	0.086264	8	0.323166
Trial 1	1.1	S_TWN	F	0:01:10.490-0:01:10.756	BL	0.0863594	8	0.323522
Trial 1	1.1	S_TWN	F	0:01:10.756-0:01:11.022	BL	0.185412	8	0.694602
Trial 1	1.1	S_TWN	F	0:01:11.022-0:01:11.288	BL	0.0921982	8	0.345398
Trial 1	1.1	S_TWN	F	0:01:11.288-0:01:11.554	BL	0.125961	8	0.471885
Trial 1	1.1	S_TWN	F	0:01:11.554-0:01:11.820	BL	0.0782042	8	0.292971
Trial 1	1.1	S_TWN	F	0:01:11.820-0:01:12.086	BL	0.0430056	8	0.161109
Trial 1	1.1	S_TWN	F	0:01:12.086-0:01:12.352	BL	0.062851	8	0.235456
Trial 1	1.1	S_TWN	F	0:01:12.352-0:01:12.618	BL	0.0239002	8	0.0895361
Trial 1	1.1	S_TWN	F	0:01:12.618-0:01:12.884	BL	0.0885977	8	0.331909
Trial 1	1.1	S_TWN	F	0:01:12.884-0:01:13.150	BL	0.0371729	8	0.139259
Trial 1	1.1	S_TWN	F	0:01:13.150-0:01:13.416	BL	0.0930836	8	0.348716
Trial 1	1.1	S_TWN	F	0:01:13.416-0:01:13.682	BL	0.0581845	8	0.217975
Trial 1	1.1	S_TWN	F	0:01:13.682-0:01:13.948	BL	0.132367	8	0.495882
Trial 1	1.1	S_TWN	F	0:01:13.948-0:01:14.214	BL	0.0430854	8	0.161409
Trial 1	1.1	S_TWN	F	0:01:14.214-0:01:14.480	BL	0.113074	8	0.423601
Trial 1	1.1	S_TWN	F	0:01:14.480-0:01:14.746	BL	0.0710407	8	0.266138
Trial 1	1.1	S_TWN	F	0:01:14.746-0:01:15.012	BL	0.0310651	8	0.116378
Trial 1	1.1	S_TWN	F	0:01:15.012-0:01:15.278	BL	0.0746203	8	0.279547
Trial 1	1.1	S_TWN	F	0:01:15.278-0:01:15.544	BL	0.0529318	8	0.198297
Trial 1	1.1	S_TWN	F	0:01:15.544-0:01:15.810	BL	0.153214	8	0.573974
Trial 1	1.1	S_TWN	F	0:01:15.810-0:01:16.076	BL	0.0422163	7	0.180746
Trial 1	1.1	S_TWN	F	0:01:16.076-0:01:16.342	BL	0.0412317	8	0.154465
Trial 1	1.1	S_TWN	F	0:01:16.342-0:01:16.608	BL	0.044667	8	0.167334
Trial 1	1.1	S_TWN	F	0:01:16.608-0:01:16.874	BL	0.0219898	8	0.082379
Trial 1	1.1	S_TWN	F	0:01:16.874-0:01:17.140	BL	0.145263	8	0.544194
Trial 1	1.1	S_TWN	F	0:01:17.140-0:01:17.406	BL	0.0454386	8	0.170224
Trial 1	1.1	S_TWN	F	0:01:17.406-0:01:17.672	BL	0.125532	8	0.470275
Trial 1	1.1	S_TWN	F	0:01:17.672-0:01:17.938	BL	0.063275	8	0.237044
Trial 1	1.1	S_TWN	F	0:01:17.938-0:01:18.204	BL	0.0699534	8	0.262062
Trial 1	1.1	S_TWN	F	0:01:18.204-0:01:18.470	BL	0.0711558	8	0.26657
Trial 1	1.1	S_TWN	F	0:01:18.470-0:01:18.736	BL	0.0684403	8	0.256394
Trial 1	1.1	S_TWN	F	0:01:18.736-0:01:19.002	BL	0.0899435	8	0.33695
Trial 1	1.1	S_TWN	F	0:01:19.002-0:01:19.268	BL	0.249458	8	0.934532
Trial 1	1.1	S_TWN	F	0:01:19.268-0:01:19.534	BL	0.258892	8	0.969869
Trial 1	1.1	S_TWN	F	0:01:19.534-0:01:19.800	BL	0.135628	8	0.508098
Trial 1	1.1	S_TWN	F	0:01:19.800-0:01:20.066	BL	0.110188	8	0.412794
Trial 1	1.1	S_TWN	F	0:01:20.066-0:01:20.332	BL	0.0816174	8	0.305761
Trial 1	1.1	S_TWN	F	0:01:20.332-0:01:20.598	BL	0.138053	8	0.51718
Trial 1	1.1	S_TWN	F	0:01:20.598-0:01:20.864	BL	0.0371956	8	0.139343
Trial 1	1.1	S_TWN	F	0:01:20.864-0:01:21.130	BL	0.0615057	8	0.230417
Trial 1	1.1	S_TWN	F	0:01:21.130-0:01:21.396	BL	0.0684479	8	0.256422
Trial 1	1.1	S_TWN	F	0:01:21.396-0:01:21.662	BL	0.0871843	8	0.326613
Trial 1	1.1	S_TWN	F	0:01:21.662-0:01:21.928	BL	0.10414	8	0.390131
Trial 1	1.1	S_TWN	F	0:01:21.928-0:01:22.194	BL	0.0522134	8	0.195604
Trial 1	1.1	S_TWN	F	0:01:22.194-0:01:22.460	BL	0.129681	8	0.485817
Trial 1	1.1	S_TWN	F	0:01:22.460-0:01:22.726	BL	0.0327164	8	0.122563
Trial 1	1.1	S_TWN	F	0:01:22.726-0:01:22.992	BL	0.136266	8	0.510491
Trial 1	1.1	S_TWN	F	0:01:22.992-0:01:23.258	BL	0.114369	8	0.428454
Trial 1	1.1	S_TWN	F	0:01:23.258-0:01:23.524	BL	0.115347	8	0.432114
Trial 1	1.1	S_TWN	F	0:01:23.524-0:01:23.790	BL	0.156057	8	0.584633
Trial 1	1.1	S_TWN	F	0:01:23.790-0:01:24.056	BL	0.0752246	8	0.28181
Trial 1	1.1	S_TWN	F	0:01:24.056-0:01:24.322	BL	0.129373	8	0.484666
Trial 1	1.1	S_TWN	F	0:01:24.322-0:01:24.588	BL	0.0812322	8	0.304315
Trial 1	1.1	S_TWN	F	0:01:24.588-0:01:24.854	BL	0.138524	8	0.518943
Trial 1	1.1	S_TWN	F	0:01:24.854-0:01:25.120	BL	0.0382987	8	0.143477
Trial 1	1.1	S_TWN	F	0:01:25.120-0:01:25.386	BL	0.0763261	8	0.285936
Trial 1	1.1	S_TWN	F	0:01:25.386-0:01:25.652	BL	0.0448902	7	0.192194
Trial 1	1.1	S_TWN	F	0:01:25.652-0:01:25.918	BL	0.0385869	8	0.144558
Trial 1	1.1	S_TWN	F	0:01:25.918-0:01:26.184	BL	0.115308	8	0.431971
Trial 1	1.1	S_TWN	F	0:01:26.184-0:01:26.450	BL	0.076623	8	0.287047
Trial 1	1.1	S_TWN	F	0:01:26.450-0:01:26.716	BL	0.0904539	8	0.338862
Trial 1	1.1	S_TWN	F	0:01:26.716-0:01:26.982	BL	0.0940776	8	0.352438
Trial 1	1.1	S_TWN	F	0:01:26.982-0:01:27.248	BL	0.15449	8	0.578756
Trial 1	1.1	S_TWN	F	0:01:27.248-0:01:27.514	BL	0.0253783	8	0.095073
Trial 1	1.1	S_TWN	F	0:01:27.514-0:01:27.780	BL	0.0700673	8	0.262487
Trial 1	1.1	S_TWN	F	0:01:27.780-0:01:28.046	BL	0.0568233	8	0.212874
Trial 1	1.1	S_TWN	F	0:01:28.046-0:01:28.312	BL	0.207624	8	0.777808
Trial 1	1.1	S_TWN	F	0:01:28.312-0:01:28.578	BL	0.156621	8	0.586743
Trial 1	1.1	S_TWN	F	0:01:28.578-0:01:28.844	BL	0.0854474	8	0.320106
Trial 1	1.1	S_TWN	F	0:01:28.844-0:01:29.110	BL	0.102905	8	0.385509
Trial 1	1.1	S_TWN	F	0:01:29.110-0:01:29.376	BL	0.0647049	8	0.242403
Trial 1	1.1	S_TWN	F	0:01:29.376-0:01:29.642	BL	0.208712	8	0.78189
Trial 1	1.1	S_TWN	F	0:01:29.642-0:01:29.908	BL	0.0576056	8	0.215806
Trial 1	1.1	S_TWN	F	0:01:29.908-0:01:30.174	BL	0.148337	8	0.555705
Trial 1	1.1	S_TWN	F	0:01:30.174-0:01:30.440	BL	0.0782865	8	0.29328
Trial 1	1.1	S_TWN	F	0:01:30.440-0:01:30.706	BL	0.0962382	8	0.360532
Trial 1	1.1	S_TWN	F	0:01:30.706-0:01:30.972	BL	0.091323	8	0.342117
Trial 1	1.1	S_TWN	F	0:01:30.972-0:01:31.238	BL	0.0455437	8	0.170618
Trial 1	1.1	S_TWN	F	0:01:31.238-0:01:31.504	BL	0.148694	8	0.55704
Trial 1	1.1	S_TWN	F	0:01:31.504-0:01:31.770	BL	0.475957	8	1.78305
Trial 1	1.1	S_TWN	F	0:01:31.770-0:01:32.036	BL	0.251824	8	0.943402
Trial 1	1.1	S_TWN	F	0:01:32.036-0:01:32.302	BL	0.134862	8	0.505226
Trial 1	1.1	S_TWN	F	0:01:32.302-0:01:32.568	BL	0.163805	8	0.613659
Trial 1	1.1	S_TWN	F	0:01:32.568-0:01:32.834	BL	0.124826	8	0.467629
Trial 1	1.1	S_TWN	F	0:01:32.834-0:01:33.100	BL	0.276269	8	1.03497
Trial 1	1.1	S_TWN	F	0:01:33.100-0:01:33.366	BL	0.113059	8	0.423547
Trial 1	1.1	S_TWN	F	0:01:33.366-0:01:33.632	BL	0.31731	8	1.18872
Trial 1	1.1	S_TWN	F	0:01:33.632-0:01:33.898	BL	0.226238	8	0.84755
Trial 1	1.1	S_TWN	F	0:01:33.898-0:01:34.164	BL	0.10108	8	0.378671
Trial 1	1.1	S_TWN	F	0:01:34.164-0:01:34.430	BL	0.108964	8	0.408207
Trial 1	1.1	S_TWN	F	0:01:34.430-0:01:34.696	BL	0.165794	8	0.621107
Trial 1	1.1	S_TWN	F	0:01:34.696-0:01:34.962	BL	0.12211	8	0.457453
Trial 1	1.1	S_TWN	F	0:01:34.962-0:01:35.228	BL	0.0838111	7	0.358832
Trial 1	1.1	S_TWN	F	0:01:35.228-0:01:35.494	BL	0.0886691	8	0.332179
Trial 1	1.1	S_TWN	F	0:01:35.494-0:01:35.760	BL	0.143234	8	0.536591
Trial 1	1.1	S_TWN	F	0:01:35.760-0:01:36.026	BL	0.0916788	8	0.343454
Trial 1	1.1	S_TWN	F	0:01:36.026-0:01:36.292	BL	0.0767809	8	0.28764
Trial 1	1.1	S_TWN	F	0:01:36.292-0:01:36.558	BL	0.0332784	8	0.124669
Trial 1	1.1	S_TWN	F	0:01:36.558-0:01:36.824	BL	0.0464749	8	0.174106
Trial 1	1.1	S_TWN	F	0:01:36.824-0:01:37.090	BL	0.0352156	8	0.131926
Trial 1	1.1	S_TWN	F	0:01:37.090-0:01:37.356	BL	0.051185	8	0.191752
Trial 1	1.1	S_TWN	F	0:01:37.356-0:01:37.622	BL	0.0840423	8	0.314843
Trial 1	1.1	S_TWN	F	0:01:37.622-0:01:37.888	BL	0.0907698	8	0.340047
Trial 1	1.1	S_TWN	F	0:01:37.888-0:01:38.154	BL	0.150024	8	0.562029
Trial 1	1.1	S_TWN	F	0:01:38.154-0:01:38.420	BL	0.058193	8	0.218006
Trial 1	1.1	S_TWN	F	0:01:38.420-0:01:38.686	BL	0.0800748	8	0.29998
Trial 1	1.1	S_TWN	F	0:01:38.686-0:01:38.952	BL	0.0346322	8	0.12974
Trial 1	1.1	S_TWN	F	0:01:38.952-0:01:39.218	BL	0.0870032	8	0.325934
Trial 1	1.1	S_TWN	F	0:01:39.218-0:01:39.484	BL	0.073151	8	0.274044
Trial 1	1.1	S_TWN	F	0:01:39.484-0:01:39.750	BL	0.100573	8	0.376771
Trial 1	1.1	S_TWN	F	0:01:39.750-0:01:40.016	BL	0.0967544	8	0.362465
Trial 1	1.1	S_TWN	F	0:01:40.016-0:01:40.282	BL	0.0504661	8	0.189057
Trial 1	1.1	S_TWN	F	0:01:40.282-0:01:40.548	BL	0.133552	8	0.500315
Trial 1	1.1	S_TWN	F	0:01:40.548-0:01:40.814	BL	0.0134298	8	0.0503112
Trial 1	1.1	S_TWN	F	0:01:40.814-0:01:41.080	BL	0.0738762	8	0.276758
Trial 1	1.1	S_TWN	F	0:01:41.080-0:01:41.346	BL	0.0463334	8	0.173576
Trial 1	1.1	S_TWN	F	0:01:41.346-0:01:41.612	BL	0.0930121	8	0.348445
Trial 1	1.1	S_TWN	F	0:01:41.612-0:01:41.878	BL	0.403256	8	1.5107
Trial 1	1.1	S_TWN	F	0:01:41.878-0:01:42.144	BL	0.218783	8	0.819618
Trial 1	1.1	S_TWN	F	0:01:42.144-0:01:42.410	BL	0.0738729	8	0.276746
Trial 1	1.1	S_TWN	F	0:01:42.410-0:01:42.676	BL	0.0280393	8	0.105043
Trial 1	1.1	S_TWN	F	0:01:42.676-0:01:42.942	BL	0.124571	8	0.466671
Trial 1	1.1	S_TWN	F	0:01:42.942-0:01:43.208	BL	0.0355969	8	0.133355
Trial 1	1.1	S_TWN	F	0:01:43.208-0:01:43.474	BL	0.0547376	8	0.20506
Trial 1	1.1	S_TWN	F	0:01:43.474-0:01:43.740	BL	0.0623988	8	0.233761
Trial 1	1.1	S_TWN	F	0:01:43.740-0:01:44.006	BL	0.0531829	8	0.199238
Trial 1	1.1	S_TWN	F	0:01:44.006-0:01:44.272	BL	0.0939706	8	0.352036
Trial 1	1.1	S_TWN	F	0:01:44.272-0:01:44.538	BL	0.0509273	8	0.190786
Trial 1	1.1	S_TWN	F	0:01:44.538-0:01:44.804	BL	0.0317299	7	0.135849
Trial 1	1.1	S_TWN	F	0:01:44.804-0:01:45.070	BL	0.0252199	8	0.09448
Trial 1	1.1	S_TWN	F	0:01:45.070-0:01:45.336	BL	0.10618	8	0.397781
Trial 1	1.1	S_TWN	F	0:01:45.336-0:01:45.602	BL	0.055897	8	0.209406
Trial 1	1.1	S_TWN	F	0:01:45.602-0:01:45.868	BL	0.0965867	8	0.361837
Trial 1	1.1	S_TWN	F	0:01:45.868-0:01:46.134	BL	0.117279	8	0.439353
Trial 1	1.1	S_TWN	F	0:01:46.134-0:01:46.400	BL	0.0783635	8	0.293569
Trial 1	1.1	S_TWN	F	0:01:46.400-0:01:46.666	BL	0.0407465	8	0.152647
Trial 1	1.1	S_TWN	F	0:01:46.666-0:01:46.932	BL	0.0502534	8	0.188264
Trial 1	1.1	S_TWN	F	0:01:46.932-0:01:47.198	BL	0.0524594	8	0.196525
Trial 1	1.1	S_TWN	F	0:01:47.198-0:01:47.464	BL	0.0537723	8	0.201444
Trial 1	1.1	S_TWN	F	0:01:47.464-0:01:47.730	BL	0.0951871	8	0.356595
Trial 1	1.1	S_TWN	F	0:01:47.730-0:01:47.996	BL	0.0526124	8	0.197098
Trial 1	1.1	S_TWN	F	0:01:47.996-0:01:48.262	BL	0.0774467	8	0.290134
Trial 1	1.1	S_TWN	F	0:01:48.262-0:01:48.528	BL	0.0476962	8	0.178681
Trial 1	1.1	S_TWN	F	0:01:48.528-0:01:48.794	BL	0.06355	8	0.238073
Trial 1	1.1	S_TWN	F	0:01:48.794-0:01:49.060	BL	0.0478891	8	0.179405
Trial 1	1.1	S_TWN	F	0:01:49.060-0:01:49.326	BL	0.0212237	8	0.0795087
Trial 1	1.1	S_TWN	F	0:01:49.326-0:01:49.592	BL	0.0661832	8	0.247938
Trial 1	1.1	S_TWN	F	0:01:49.592-0:01:49.858	BL	0.0397006	8	0.148728
Trial 1	1.1	S_TWN	F	0:01:49.858-0:01:50.124	BL	0.0726327	8	0.272102
Trial 1	1.1	S_TWN	F	0:01:50.124-0:01:50.390	BL	0.0295255	8	0.110611
Trial 1	1.1	S_TWN	F	0:01:50.390-0:01:50.656	BL	0.0989328	8	0.370626
Trial 1	1.1	S_TWN	F	0:01:50.656-0:01:50.922	BL	0.0412291	8	0.154455
Trial 1	1.1	S_TWN	F	0:01:50.922-0:01:51.188	BL	0.0315465	8	0.118181
Trial 1	1.1	S_TWN	F	0:01:51.188-0:01:51.454	BL	0.026151	8	0.0979678
Trial 1	1.1	S_TWN	F	0:01:51.454-0:01:51.720	BL	0.0369451	8	0.138407
Trial 1	1.1	S_TWN	F	0:01:51.720-0:01:51.986	BL	0.039939	8	0.149621
Trial 1	1.1	S_TWN	F	0:01:51.986-0:01:52.252	BL	0.0561155	8	0.210222
Trial 1	1.1	S_TWN	F	0:01:52.252-0:01:52.518	BL	0.0672124	8	0.251793
Trial 1	1.1	S_TWN	F	0:01:52.518-0:01:52.784	BL	0.01921	8	0.0719658
Trial 1	1.1	S_TWN	F	0:01:52.784-0:01:53.050	BL	0.051806	8	0.194079
Trial 1	1.1	S_TWN	F	0:01:53.050-0:01:53.316	BL	0.0422403	8	0.158243
Trial 1	1.1	S_TWN	F	0:01:53.316-0:01:53.582	BL	0.0863123	8	0.323348
Trial 1	1.1	S_TWN	F	0:01:53.582-0:01:53.848	BL	0.0289699	8	0.108528
Trial 1	1.1	S_TWN	F	0:01:53.848-0:01:54.114	BL	0.0203355	7	0.0870645
Trial 1	1.1	S_TWN	F	0:01:54.114-0:01:54.380	BL	0.0644333	8	0.241384
Trial 1	1.1	S_TWN	F	0:01:54.380-0:01:54.646	BL	0.0230106	8	0.0862029
Trial 1	1.1	S_TWN	F	0:01:54.646-0:01:54.912	BL	0.057525	8	0.215502
Trial 1	1.1	S_TWN	F	0:01:54.912-0:01:55.178	BL	0.0477715	8	0.178965
Trial 1	1.1	S_TWN	F	0:01:55.178-0:01:55.444	BL	0.0864702	8	0.32394
Trial 1	1.1	S_TWN	F	0:01:55.444-0:01:55.710	BL	0.0638912	8	0.239353
Trial 1	1.1	S_TWN	F	0:01:55.710-0:01:55.976	BL	0.0859637	8	0.322042
Trial 1	1.1	S_TWN	F	0:01:55.976-0:01:56.242	BL	0.108517	8	0.406534
Trial 1	1.1	S_TWN	F	0:01:56.242-0:01:56.508	BL	0.0402583	8	0.150819
Trial 1	1.1	S_TWN	F	0:01:56.508-0:01:56.774	BL	0.107624	8	0.403189
Trial 1	1.1	S_TWN	F	0:01:56.774-0:01:57.040	BL	0.0145064	8	0.0543449
Trial 1	1.1	S_TWN	F	0:01:57.040-0:01:57.306	BL	0.0580676	8	0.217535
Trial 1	1.1	S_TWN	F	0:01:57.306-0:01:57.572	BL	0.0394853	8	0.147921
Trial 1	1.1	S_TWN	F	0:01:57.572-0:01:57.838	BL	0.0399529	8	0.149673
Trial 1	1.1	S_TWN	F	0:01:57.838-0:01:58.104	BL	0.0335176	8	0.125565
Trial 1	1.1	S_TWN	F	0:01:58.104-0:01:58.370	BL	0.0602575	8	0.225739
Trial 1	1.1	S_TWN	F	0:01:58.370-0:01:58.636	BL	0.102907	8	0.385511
Trial 1	1.1	S_TWN	F	0:01:58.636-0:01:58.902	BL	0.0469908	8	0.176039
Trial 1	1.1	S_TWN	F	0:01:58.902-0:01:59.168	BL	0.140676	8	0.527012
Trial 1	1.1	S_TWN	F	0:01:59.168-0:01:59.434	BL	0.0453113	8	0.169747
Trial 1	1.1	S_TWN	F	0:01:59.434-0:01:59.700	BL	0.120235	8	0.45043
Trial 1	1.1	S_TWN	F	0:01:59.700-0:01:59.966	BL	0.0879733	8	0.329568
Trial 1	1.1	S_TWN	F	0:01:59.966-0:02:00.232	BL	0.112675	8	0.422106
Trial 1	1.1	S_TWN	F	0:02:00.232-0:02:00.498	BL	0.0803649	8	0.301068
Trial 1	1.1	S_TWN	F	0:02:00.498-0:02:00.764	BL	0.0523871	8	0.196255
Trial 1	1.1	S_TWN	F	0:02:00.764-0:02:01.030	BL	0.166715	8	0.624559
Trial 1	1.1	S_TWN	F	0:02:01.030-0:02:01.296	BL	0.0407084	8	0.152505
Trial 1	1.1	S_TWN	F	0:02:01.296-0:02:01.562	BL	0.150793	8	0.564905
Trial 1	1.1	S_TWN	F	0:02:01.562-0:02:01.828	BL	0.063094	8	0.236367
Trial 1	1.1	S_TWN	F	0:02:01.828-0:02:02.094	BL	0.0772005	8	0.289213
Trial 1	1.1	S_TWN	F	0:02:02.094-0:02:02.360	BL	0.0443353	8	0.166091
Trial 1	1.1	S_TWN	F	0:02:02.360-0:02:02.626	BL	0.0391738	8	0.146754
Trial 1	1.1	S_TWN	F	0:02:02.626-0:02:02.892	BL	0.0205041	8	0.0768136
Trial 1	1.1	S_TWN	F	0:02:02.892-0:02:03.158	BL	0.076019	8	0.284787
Trial 1	1.1	S_TWN	F	0:02:03.158-0:02:03.424	BL	0.0478565	8	0.179282
Trial 1	1.1	S_TWN	F	0:02:03.424-0:02:03.690	BL	0.0342393	7	0.146593
Trial 1	1.1	S_TWN	F	0:02:03.690-0:02:03.956	BL	0.054748	8	0.205099
Trial 1	1.1	S_TWN	F	0:02:03.956-0:02:04.222	BL	0.0182756	8	0.0684649
Trial 1	1.1	S_TWN	F	0:02:04.222-0:02:04.488	BL	0.120177	8	0.450211
Trial 1	1.1	S_TWN	F	0:02:04.488-0:02:04.754	BL	0.0973619	8	0.364741
Trial 1	1.1	S_TWN	F	0:02:04.754-0:02:05.020	BL	0.104646	8	0.392031
Trial 1	1.1	S_TWN	F	0:02:05.020-0:02:05.286	BL	0.104649	8	0.392043
Trial 1	1.1	S_TWN	F	0:02:05.286-0:02:05.552	BL	0.0831661	8	0.311559
Trial 1	1.1	S_TWN	F	0:02:05.552-0:02:05.818	BL	0.158612	8	0.594198
Trial 1	1.1	S_TWN	F	0:02:05.818-0:02:06.084	BL	0.0925015	8	0.346535
Trial 1	1.1	S_TWN	F	0:02:06.084-0:02:06.350	BL	0.0384264	8	0.143954
Trial 1	1.1	S_TWN	F	0:02:06.350-0:02:06.616	BL	0.0300858	8	0.112709
Trial 1	1.1	S_TWN	F	0:02:06.616-0:02:06.882	BL	0.0258909	8	0.0969935
Trial 1	1.1	S_TWN	F	0:02:06.882-0:02:07.148	BL	0.0406052	8	0.152117
Trial 1	1.1	S_TWN	F	0:02:07.148-0:02:07.414	BL	0.0482418	8	0.180727
Trial 1	1.1	S_TWN	F	0:02:07.414-0:02:07.680	BL	0.025153	8	0.0942295
Trial 1	1.1	S_TWN	F	0:02:07.680-0:02:07.946	BL	0.0402745	8	0.150881
Trial 1	1.1	S_TWN	F	0:02:07.946-0:02:08.212	BL	0.100781	8	0.377548
Trial 1	1.1	S_TWN	F	0:02:08.212-0:02:08.478	BL	0.182847	8	0.684991
Trial 1	1.1	S_TWN	F	0:02:08.478-0:02:08.744	BL	0.120968	8	0.453179
Trial 1	1.1	S_TWN	F	0:02:08.744-0:02:09.010	BL	0.170064	8	0.637098
Trial 1	1.1	S_TWN	F	0:02:09.010-0:02:09.276	BL	0.12291	8	0.460452
Trial 1	1.1	S_TWN	F	0:02:09.276-0:02:09.542	BL	0.108255	8	0.405548
Trial 1	1.1	S_TWN	F	0:02:09.542-0:02:09.808	BL	0.165564	8	0.620241
Trial 1	1.1	S_TWN	F	0:02:09.808-0:02:10.074	BL	0.116199	8	0.435317
Trial 1	1.1	S_TWN	F	0:02:10.074-0:02:10.340	BL	0.035445	8	0.132785
Trial 1	1.1	S_TWN	F	0:02:10.340-0:02:10.606	BL	0.0994057	8	0.372402
Trial 1	1.1	S_TWN	F	0:02:10.606-0:02:10.872	BL	0.0795972	8	0.298192
Trial 1	1.1	S_TWN	F	0:02:10.872-0:02:11.138	BL	0.31085	8	1.16452
Trial 1	1.1	S_TWN	F	0:02:11.138-0:02:11.404	BL	0.371087	8	1.39019
Trial 1	1.1	S_TWN	F	0:02:11.404-0:02:11.670	BL	0.259549	8	0.972332
Trial 1	1.1	S_TWN	F	0:02:11.670-0:02:11.936	BL	0.219169	8	0.821068
Trial 1	1.1	S_TWN	F	0:02:11.936-0:02:12.202	BL	0.324466	8	1.21553
Trial 1	1.1	S_TWN	F	0:02:12.202-0:02:12.468	BL	0.0852179	8	0.319248
Trial 1	1.1	S_TWN	F	0:02:12.468-0:02:12.734	BL	0.0675993	8	0.253244
Trial 1	1.1	S_TWN	F	0:02:12.734-0:02:13.000	BL	0.106267	8	0.398102
Trial 1	1.1	S_TWN	F	0:02:13.000-0:02:13.266	BL	0.0221869	7	0.0949914
Trial 1	1.1	S_TWN	F	0:02:13.266-0:02:13.532	BL	0.0667017	8	0.249882
Trial 1	1.1	S_TWN	F	0:02:13.532-0:02:13.798	BL	0.0635761	8	0.238171
Trial 1	1.1	S_TWN	F	0:02:13.798-0:02:14.064	BL	0.0693981	8	0.259983
Trial 1	1.1	S_TWN	F	0:02:14.064-0:02:14.330	BL	0.0427905	8	0.160303
Trial 1	1.1	S_TWN	F	0:02:14.330-0:02:14.596	BL	0.114803	8	0.430081
Trial 1	1.1	S_TWN	F	0:02:14.596-0:02:14.862	BL	0.158516	8	0.593844
Trial 1	1.1	S_TWN	F	0:02:14.862-0:02:15.128	BL	0.120624	8	0.451885
Trial 1	1.1	S_TWN	F	0:02:15.128-0:02:15.394	BL	0.151164	8	0.566296
Trial 1	1.1	S_TWN	F	0:02:15.394-0:02:15.660	BL	0.196696	8	0.736874
Trial 1	1.1	S_TWN	F	0:02:15.660-0:02:15.926	BL	0.117789	8	0.441267
Trial 1	1.1	S_TWN	F	0:02:15.926-0:02:16.192	BL	0.0890272	8	0.333519
Trial 1	1.1	S_TWN	F	0:02:16.192-0:02:16.458	BL	0.0647531	8	0.242581
Trial 1	1.1	S_TWN	F	0:02:16.458-0:02:16.724	BL	0.039298	8	0.147221
Trial 1	1.1	S_TWN	F	0:02:16.724-0:02:16.990	BL	0.042563	8	0.159453
Trial 1	1.1	S_TWN	F	0:02:16.990-0:02:17.256	BL	0.060644	8	0.227187
Trial 1	1.1	S_TWN	F	0:02:17.256-0:02:17.522	BL	0.0441695	8	0.16547
Trial 1	1.1	S_TWN	F	0:02:17.522-0:02:17.788	BL	0.0598153	8	0.224083
Trial 1	1.1	S_TWN	F	0:02:17.788-0:02:18.054	BL	0.0684046	8	0.256261
Trial 1	1.1	S_TWN	F	0:02:18.054-0:02:18.320	BL	0.0687913	8	0.257709
Trial 1	1.1	S_TWN	F	0:02:18.320-0:02:18.586	BL	0.0359658	8	0.134736
Trial 1	1.1	S_TWN	F	0:02:18.586-0:02:18.852	BL	0.108014	8	0.404651
Trial 1	1.1	S_TWN	F	0:02:18.852-0:02:19.118	BL	0.0972571	8	0.364349
Trial 1	1.1	S_TWN	F	0:02:19.118-0:02:19.384	BL	0.0871865	8	0.326622
Trial 1	1.1	S_TWN	F	0:02:19.384-0:02:19.650	BL	0.0340388	8	0.127517
Trial 1	1.1	S_TWN	F	0:02:19.650-0:02:19.916	BL	0.0318858	8	0.119452
Trial 1	1.1	S_TWN	F	0:02:19.916-0:02:20.182	BL	0.0763356	8	0.285972
Trial 1	1.1	S_TWN	F	0:02:20.182-0:02:20.448	BL	0.0405976	8	0.152089
Trial 1	1.1	S_TWN	F	0:02:20.448-0:02:20.714	BL	0.09063	8	0.339524
Trial 1	1.1	S_TWN	F	0:02:20.714-0:02:20.980	BL	0.0510314	8	0.191175
Trial 1	1.1	S_TWN	F	0:02:20.980-0:02:21.246	BL	0.111363	8	0.417193
Trial 1	1.1	S_TWN	F	0:02:21.246-0:02:21.512	BL	0.0477598	8	0.178921
Trial 1	1.1	S_TWN	F	0:02:21.512-0:02:21.778	BL	0.0520348	8	0.194935
Trial 1	1.1	S_TWN	F	0:02:21.778-0:02:22.044	BL	0.054225	8	0.20314
Trial 1	1.1	S_TWN	F	0:02:22.044-0:02:22.310	BL	0.0668791	8	0.250548
Trial 1	1.1	S_TWN	F	0:02:22.310-0:02:22.576	BL	0.123433	8	0.462407
Trial 1	1.1	S_TWN	F	0:02:22.576-0:02:22.842	BL	0.0476719	7	0.204103
Trial 1	1.1	S_TWN	F	0:02:22.842-0:02:23.108	BL	0.143493	8	0.537565
Trial 1	1.1	S_TWN	F	0:02:23.108-0:02:23.374	BL	0.0499607	8	0.187164
Trial 1	1.1	S_TWN	F	0:02:23.374-0:02:23.640	BL	0.126948	8	0.475578
Trial 1	1.1	S_TWN	F	0:02:23.640-0:02:23.906	BL	0.0320015	8	0.119885
Trial 1	1.1	S_TWN	F	0:02:23.906-0:02:24.172	BL	0.0747106	8	0.279883
Trial 1	1.1	S_TWN	F	0:02:24.172-0:02:24.438	BL	0.0643887	8	0.241216
Trial 1	1.1	S_TWN	F	0:02:24.438-0:02:24.704	BL	0.0446226	8	0.167167
Trial 1	1.1	S_TWN	F	0:02:24.704-0:02:24.970	BL	0.0680796	8	0.255043
Trial 1	1.1	S_TWN	F	0:02:24.970-0:02:25.236	BL	0.0768286	8	0.28782
Trial 1	1.1	S_TWN	F	0:02:25.236-0:02:25.502	BL	0.0949698	8	0.35578
Trial 1	1.1	S_TWN	F	0:02:25.502-0:02:25.768	BL	0.0772849	8	0.289529
Trial 1	1.1	S_TWN	F	0:02:25.768-0:02:26.034	BL	0.119527	8	0.447779
Trial 1	1.1	S_TWN	F	0:02:26.034-0:02:26.300	BL	0.0724846	8	0.271546
Trial 1	1.1	S_TWN	F	0:02:26.300-0:02:26.566	BL	0.12672	8	0.474723
Trial 1	1.1	S_TWN	F	0:02:26.566-0:02:26.832	BL	0.0716219	8	0.268314
Trial 1	1.1	S_TWN	F	0:02:26.832-0:02:27.098	BL	0.0483217	8	0.181024
Trial 1	1.1	S_TWN	F	0:02:27.098-0:02:27.364	BL	0.0568648	8	0.213029
Trial 1	1.1	S_TWN	F	0:02:27.364-0:02:27.630	BL	0.0929031	8	0.348037
Trial 1	1.1	S_TWN	F	0:02:27.630-0:02:27.896	BL	0.0596086	8	0.223309
Trial 1	1.1	S_TWN	F	0:02:27.896-0:02:28.162	BL	0.0355724	8	0.133263
Trial 1	1.1	S_TWN	F	0:02:28.162-0:02:28.428	BL	0.0782167	8	0.293018
Trial 1	1.1	S_TWN	F	0:02:28.428-0:02:28.694	BL	0.0386121	8	0.144651
Trial 1	1.1	S_TWN	F	0:02:28.694-0:02:28.960	BL	0.0169013	8	0.0633173
Trial 1	1.1	S_TWN	F	0:02:28.960-0:02:29.226	BL	0.100727	8	0.377346
Trial 1	1.1	S_TWN	F	0:02:29.226-0:02:29.492	BL	0.0741123	8	0.277642
Trial 1	1.1	S_TWN	F	0:02:29.492-0:02:29.758	BL	0.109441	8	0.409993
Trial 1	1.1	S_TWN	F	0:02:29.758-0:02:30.024	BL	0.0411089	8	0.154004
Trial 1	1.1	S_TWN	F	0:02:30.024-0:02:30.290	BL	0.0671525	8	0.25157
Trial 1	1.1	S_TWN	F	0:02:30.290-0:02:30.556	BL	0.073376	8	0.274884
Trial 1	1.1	S_TWN	F	0:02:30.556-0:02:30.822	BL	0.0640107	8	0.239802
Trial 1	1.1	S_TWN	F	0:02:30.822-0:02:31.088	BL	0.105228	8	0.394213
Trial 1	1.1	S_TWN	F	0:02:31.088-0:02:31.354	BL	0.0702054	8	0.263006
Trial 1	1.1	S_TWN	F	0:02:31.354-0:02:31.620	BL	0.0655277	8	0.245483
Trial 1	1.1	S_TWN	F	0:02:31.620-0:02:31.886	BL	0.0805415	8	0.301728
Trial 1	1.1	S_TWN	F	0:02:31.886-0:02:32.152	BL	0.0911873	7	0.390414
Trial 1	1.1	S_TWN	F	0:02:32.152-0:02:32.418	BL	0.0603819	8	0.226207
Trial 1	1.1	S_TWN	F	0:02:32.418-0:02:32.684	BL	0.0314219	8	0.117714
Trial 1	1.1	S_TWN	F	0:02:32.684-0:02:32.950	BL	0.0819723	8	0.307087
Trial 1	1.1	S_TWN	F	0:02:32.950-0:02:33.216	BL	0.0615423	8	0.230552
Trial 1	1.1	S_TWN	F	0:02:33.216-0:02:33.482	BL	0.0666699	8	0.249761
Trial 1	1.1	S_TWN	F	0:02:33.482-0:02:33.748	BL	0.0514283	8	0.192663
Trial 1	1.1	S_TWN	F	0:02:33.748-0:02:34.014	BL	0.101781	8	0.381295
Trial 1	1.1	S_TWN	F	0:02:34.014-0:02:34.280	BL	0.0634846	8	0.237831
Trial 1	1.1	S_TWN	F	0:02:34.280-0:02:34.546	BL	0.0551095	8	0.206455
Trial 1	1.1	S_TWN	F	0:02:34.546-0:02:34.812	BL	0.0430524	8	0.161285
Trial 1	1.1	S_TWN	F	0:02:34.812-0:02:35.078	BL	0.0409147	8	0.153278
Trial 1	1.1	S_TWN	F	0:02:35.078-0:02:35.344	BL	0.0358604	8	0.134343
Trial 1	1.1	S_TWN	F	0:02:35.344-0:02:35.610	BL	0.0560973	8	0.210154
Trial 1	1.1	S_TWN	F	0:02:35.610-0:02:35.876	BL	0.073867	8	0.276725
Trial 1	1.1	S_TWN	F	0:02:35.876-0:02:36.142	BL	0.0497929	8	0.186536
Trial 1	1.1	S_TWN	F	0:02:36.142-0:02:36.408	BL	0.12234	8	0.458314
Trial 1	1.1	S_TWN	F	0:02:36.408-0:02:36.674	BL	0.0174961	8	0.0655445
Trial 1	1.1	S_TWN	F	0:02:36.674-0:02:36.940	BL	0.0830601	8	0.311162
Trial 1	1.1	S_TWN	F	0:02:36.940-0:02:37.206	BL	0.0138053	8	0.051718
Trial 1	1.1	S_TWN	F	0:02:37.206-0:02:37.472	BL	0.0770244	8	0.288552
Trial 1	1.1	S_TWN	F	0:02:37.472-0:02:37.738	BL	0.0166187	8	0.0622578
Trial 1	1.1	S_TWN	F	0:02:37.738-0:02:38.004	BL	0.0498056	8	0.186584
Trial 1	1.1	S_TWN	F	0:02:38.004-0:02:38.270	BL	0.0320489	8	0.120063
Trial 1	1.1	S_TWN	F	0:02:38.270-0:02:38.536	BL	0.0124138	8	0.0465053
Trial 1	1.1	S_TWN	F	0:02:38.536-0:02:38.802	BL	0.0532943	8	0.199653
Trial 1	1.1	S_TWN	F	0:02:38.802-0:02:39.068	BL	0.0158144	8	0.0592448
Trial 1	1.1	S_TWN	F	0:02:39.068-0:02:39.334	BL	0.0303068	8	0.113537
Trial 1	1.1	S_TWN	F	0:02:39.334-0:02:39.600	BL	0.0640853	8	0.24008
Trial 1	1.1	S_TWN	F	0:02:39.600-0:02:39.866	BL	0.0620419	8	0.232424
Trial 1	1.1	S_TWN	F	0:02:39.866-0:02:40.132	BL	0.0367683	8	0.137744
Trial 1	1.1	S_TWN	F	0:02:40.132-0:02:40.398	BL	0.0975435	8	0.365421
Trial 1	1.1	S_TWN	F	0:02:40.398-0:02:40.664	BL	0.0611442	8	0.22906
Trial 1	1.1	S_TWN	F	0:02:40.664-0:02:40.930	BL	0.0459957	8	0.172312
Trial 1	1.1	S_TWN	F	0:02:40.930-0:02:41.196	BL	0.165019	8	0.618201
Trial 1	1.1	S_TWN	F	0:02:41.196-0:02:41.462	BL	0.0342172	8	0.128186
Trial 1	1.1	S_TWN	F	0:02:41.462-0:02:41.728	BL	0.0572724	7	0.245209
Trial 1	1.1	S_TWN	F	0:02:41.728-0:02:41.994	BL	0.0482343	8	0.180698
Trial 1	1.1	S_TWN	F	0:02:41.994-0:02:42.260	BL	0.02854	8	0.106918
Trial 1	1.1	S_TWN	F	0:02:42.260-0:02:42.526	BL	0.0600132	8	0.224823
Trial 1	1.1	S_TWN	F	0:02:42.526-0:02:42.792	BL	0.0745159	8	0.279155
Trial 1	1.1	S_TWN	F	0:02:42.792-0:02:43.058	BL	0.0535155	8	0.200482
Trial 1	1.1	S_TWN	F	0:02:43.058-0:02:43.324	BL	0.0326465	8	0.122302
Trial 1	1.1	S_TWN	F	0:02:43.324-0:02:43.590	BL	0.0442929	8	0.165932
Trial 1	1.1	S_TWN	F	0:02:43.590-0:02:43.856	BL	0.0552957	8	0.207151
Trial 1	1.1	S_TWN	F	0:02:43.856-0:02:44.122	BL	0.0342764	8	0.12841
Trial 1	1.1	S_TWN	F	0:02:44.122-0:02:44.388	BL	0.0520808	8	0.195106
Trial 1	1.1	S_TWN	F	0:02:44.388-0:02:44.654	BL	0.0441828	8	0.165519
Trial 1	1.1	S_TWN	F	0:02:44.654-0:02:44.920	BL	0.0630989	8	0.236383
Trial 1	1.1	S_TWN	F	0:02:44.920-0:02:45.186	BL	0.0735452	8	0.275517
Trial 1	1.1	S_TWN	F	0:02:45.186-0:02:45.452	BL	0.0379482	8	0.142164
Trial 1	1.1	S_TWN	F	0:02:45.452-0:02:45.718	BL	0.0248293	8	0.0930173
Trial 1	1.1	S_TWN	F	0:02:45.718-0:02:45.984	BL	0.0655375	8	0.245519
Trial 1	1.1	S_TWN	F	0:02:45.984-0:02:46.250	BL	0.0360392	8	0.135011
Trial 1	1.1	S_TWN	F	0:02:46.250-0:02:46.516	BL	0.0744112	8	0.278761
Trial 1	1.1	S_TWN	F	0:02:46.516-0:02:46.782	BL	0.0400589	8	0.150071
Trial 1	1.1	S_TWN	F	0:02:46.782-0:02:47.048	BL	0.0666638	8	0.249741
Trial 1	1.1	S_TWN	F	0:02:47.048-0:02:47.314	BL	0.0628244	8	0.235357
Trial 1	1.1	S_TWN	F	0:02:47.314-0:02:47.580	BL	0.066579	8	0.249421
Trial 1	1.1	S_TWN	F	0:02:47.580-0:02:47.846	BL	0.0571873	8	0.214239
Trial 1	1.1	S_TWN	F	0:02:47.846-0:02:48.112	BL	0.0614084	8	0.230051
Trial 1	1.1	S_TWN	F	0:02:48.112-0:02:48.378	BL	0.14218	8	0.53264
Trial 1	1.1	S_TWN	F	0:02:48.378-0:02:48.644	BL	0.0642017	8	0.240517
Trial 1	1.1	S_TWN	F	0:02:48.644-0:02:48.910	BL	0.0848996	8	0.318056
Trial 1	1.1	S_TWN	F	0:02:48.910-0:02:49.176	BL	0.0425335	8	0.159341
Trial 1	1.1	S_TWN	F	0:02:49.176-0:02:49.442	BL	0.0590327	8	0.22115
Trial 1	1.1	S_TWN	F	0:02:49.442-0:02:49.708	BL	0.0238382	8	0.0893034
Trial 1	1.1	S_TWN	F	0:02:49.708-0:02:49.974	BL	0.0466478	8	0.174756
Trial 1	1.1	S_TWN	F	0:02:49.974-0:02:50.240	BL	0.0351021	8	0.131501
Trial 1	1.1	S_TWN	F	0:02:50.240-0:02:50.506	BL	0.0249744	8	0.0935611
Trial 1	1.1	S_TWN	F	0:02:50.506-0:02:50.772	BL	0.0431119	8	0.161509
Trial 1	1.1	S_TWN	F	0:02:50.772-0:02:51.038	BL	0.0656671	8	0.246006
Trial 1	1.1	S_TWN	F	0:02:51.038-0:02:51.304	BL	0.0189922	7	0.0813135
Trial 1	1.1	S_TWN	F	0:02:51.304-0:02:51.570	BL	0.0149042	8	0.0558351
Trial 1	1.1	S_TWN	F	0:02:51.570-0:02:51.836	BL	0.0225158	8	0.0843493
Trial 1	1.1	S_TWN	F	0:02:51.836-0:02:52.102	BL	0.0186206	8	0.0697579
Trial 1	1.1	S_TWN	F	0:02:52.102-0:02:52.368	BL	0.0220677	8	0.0826711
Trial 1	1.1	S_TWN	F	0:02:52.368-0:02:52.634	BL	0.10662	8	0.399427
Trial 1	1.1	S_TWN	F	0:02:52.634-0:02:52.900	BL	0.0876938	8	0.328526
Trial 1	1.1	S_TWN	F	0:02:52.900-0:02:53.166	BL	0.0896746	8	0.335944
Trial 1	1.1	S_TWN	F	0:02:53.166-0:02:53.432	BL	0.0678765	8	0.254283
Trial 1	1.1	S_TWN	F	0:02:53.432-0:02:53.698	BL	0.0918584	8	0.344123
Trial 1	1.1	S_TWN	F	0:02:53.698-0:02:53.964	BL	0.120703	8	0.452183
Trial 1	1.1	S_TWN	F	0:02:53.964-0:02:54.230	BL	0.0621974	8	0.233007
Trial 1	1.1	S_TWN	F	0:02:54.230-0:02:54.496	BL	0.0962553	8	0.360595
Trial 1	1.1	S_TWN	F	0:02:54.496-0:02:54.762	BL	0.0266252	8	0.099745
Trial 1	1.1	S_TWN	F	0:02:54.762-0:02:55.028	BL	0.109758	8	0.41118
Trial 1	1.1	S_TWN	F	0:02:55.028-0:02:55.294	BL	0.0860051	8	0.322197
Trial 1	1.1	S_TWN	F	0:02:55.294-0:02:55.560	BL	0.0902435	8	0.338075
Trial 1	1.1	S_TWN	F	0:02:55.560-0:02:55.826	BL	0.0256062	8	0.0959268
Trial 1	1.1	S_TWN	F	0:02:55.826-0:02:56.092	BL	0.0516114	8	0.19335
Trial 1	1.1	S_TWN	F	0:02:56.092-0:02:56.358	BL	0.038918	8	0.145797
Trial 1	1.1	S_TWN	F	0:02:56.358-0:02:56.624	BL	0.0500594	8	0.187533
Trial 1	1.1	S_TWN	F	0:02:56.624-0:02:56.890	BL	0.0663574	8	0.248592
Trial 1	1.1	S_TWN	F	0:02:56.890-0:02:57.156	BL	0.0390099	8	0.14614
Trial 1	1.1	S_TWN	F	0:02:57.156-0:02:57.422	BL	0.0528114	8	0.197845
Trial 1	1.1	S_TWN	F	0:02:57.422-0:02:57.688	BL	0.0145966	8	0.0546824
Trial 1	1.1	S_TWN	F	0:02:57.688-0:02:57.954	BL	0.0985239	8	0.369093
Trial 1	1.1	S_TWN	F	0:02:57.954-0:02:58.220	BL	0.0403844	8	0.15129
Trial 1	1.1	S_TWN	F	0:02:58.220-0:02:58.486	BL	0.0644501	8	0.241445
Trial 1	1.1	S_TWN	F	0:02:58.486-0:02:58.752	BL	0.0621029	8	0.232652
Trial 1	1.1	S_TWN	F	0:02:58.752-0:02:59.018	BL	0.0402383	8	0.150743
Trial 1	1.1	S_TWN	F	0:02:59.018-0:02:59.284	BL	0.047963	8	0.179682
Trial 1	1.1	S_TWN	F	0:02:59.284-0:02:59.550	BL	0.015039	8	0.0563402
Trial 1	1.1	S_TWN	F	0:02:59.550-0:02:59.816	BL	0.0575098	8	0.215447
Trial 1	1.1	S_TWN	F	0:02:59.816-0:03:00.082	BL	0.025999	8	0.0973984
Trial 1	1.1	S_TWN	F	0:03:00.082-0:03:00.348	CS1a	0.0625601	8	0.234365
Trial 1	1.1	S_TWN	F	0:03:00.348-0:03:00.614	CS1a	0.010113	8	0.0378858
Trial 1	1.1	S_TWN	F	0:03:00.614-0:03:00.880	CS1a	0.0588409	7	0.251922
Trial 1	1.1	S_TWN	F	0:03:00.880-0:03:01.146	CS1a	0.0513436	8	0.192347
Trial 1	1.1	S_TWN	F	0:03:01.146-0:03:01.412	CS1a	0.031571	8	0.118272
Trial 1	1.1	S_TWN	F	0:03:01.412-0:03:01.678	CS1a	0.0573357	8	0.214794
Trial 1	1.1	S_TWN	F	0:03:01.678-0:03:01.944	CS1a	0.0388662	8	0.145602
Trial 1	1.1	S_TWN	F	0:03:01.944-0:03:02.210	CS1a	0.0443806	8	0.16626
Trial 1	1.1	S_TWN	F	0:03:02.210-0:03:02.476	CS1a	0.0393031	8	0.147239
Trial 1	1.1	S_TWN	F	0:03:02.476-0:03:02.742	CS1a	0.261043	8	0.977934
Trial 1	1.1	S_TWN	F	0:03:02.742-0:03:03.008	CS1a	0.0955612	8	0.357998
Trial 1	1.1	S_TWN	F	0:03:03.008-0:03:03.274	CS1a	0.0945167	8	0.354084
Trial 1	1.1	S_TWN	F	0:03:03.274-0:03:03.540	CS1a	0.15621	8	0.5852
Trial 1	1.1	S_TWN	F	0:03:03.540-0:03:03.806	CS1a	0.125298	8	0.4694
Trial 1	1.1	S_TWN	F	0:03:03.806-0:03:04.072	CS1a	0.0890988	8	0.333786
Trial 1	1.1	S_TWN	F	0:03:04.072-0:03:04.338	CS1a	0.11576	8	0.43367
Trial 1	1.1	S_TWN	F	0:03:04.338-0:03:04.604	CS1a	0.121225	8	0.454138
Trial 1	1.1	S_TWN	F	0:03:04.604-0:03:04.870	CS1a	0.0822918	8	0.308284
Trial 1	1.1	S_TWN	F	0:03:04.870-0:03:05.136	CS1a	0.0682951	8	0.255852
Trial 1	1.1	S_TWN	F	0:03:05.136-0:03:05.402	CS1a	0.0717097	8	0.268641
Trial 1	1.1	S_TWN	F	0:03:05.402-0:03:05.668	CS1a	0.0276988	8	0.103767
Trial 1	1.1	S_TWN	F	0:03:05.668-0:03:05.934	CS1a	0.0275236	8	0.10311
Trial 1	1.1	S_TWN	F	0:03:05.934-0:03:06.200	CS1a	0.0502335	8	0.188186
Trial 1	1.1	S_TWN	F	0:03:06.200-0:03:06.466	CS1a	0.0638053	8	0.23903
Trial 1	1.1	S_TWN	F	0:03:06.466-0:03:06.732	CS1a	0.063539	8	0.238032
Trial 1	1.1	S_TWN	F	0:03:06.732-0:03:06.998	CS1a	0.0553721	8	0.207437
Trial 1	1.1	S_TWN	F	0:03:06.998-0:03:07.264	CS1a	0.0506422	8	0.189718
Trial 1	1.1	S_TWN	F	0:03:07.264-0:03:07.530	CS1a	0.0671079	8	0.251402
Trial 1	1.1	S_TWN	F	0:03:07.530-0:03:07.796	CS1a	0.0188602	8	0.0706556
Trial 1	1.1	S_TWN	F	0:03:07.796-0:03:08.062	CS1a	0.0463242	8	0.173541
Trial 1	1.1	S_TWN	F	0:03:08.062-0:03:08.328	CS1a	0.0398214	8	0.149182
Trial 1	1.1	S_TWN	F	0:03:08.328-0:03:08.594	CS1a	0.028464	8	0.106633
Trial 1	1.1	S_TWN	F	0:03:08.594-0:03:08.860	CS1a	0.0720325	8	0.269851
Trial 1	1.1	S_TWN	F	0:03:08.860-0:03:09.126	CS1a	0.066014	8	0.247305
Trial 1	1.1	S_TWN	F	0:03:09.126-0:03:09.392	CS1a	0.0549848	8	0.205986
Trial 1	1.1	S_TWN	F	0:03:09.392-0:03:09.658	CS1a	0.0158698	8	0.0594523
Trial 1	1.1	S_TWN	F	0:03:09.658-0:03:09.924	CS1a	0.0311395	8	0.116656
Trial 1	1.1	S_TWN	F	0:03:09.924-0:03:10.190	CS1a	0.0214246	7	0.0917276
Trial 1	1.1	S_TWN	F	0:03:10.190-0:03:10.456	CS1b	0.2447	8	0.916712
Trial 1	1.1	S_TWN	F	0:03:10.456-0:03:10.722	CS1b	0.157678	8	0.590698
Trial 1	1.1	S_TWN	F	0:03:10.722-0:03:10.988	CS1b	1.50561	8	5.64038
Trial 1	1.1	S_TWN	F	0:03:10.988-0:03:11.254	CS1b	3.49641	8	13.0985
Trial 1	1.1	S_TWN	F	0:03:11.254-0:03:11.520	CS1b	2.21182	8	8.286
Trial 1	1.1	S_TWN	F	0:03:11.520-0:03:11.786	CS1b	3.90393	8	14.6252
Trial 1	1.1	S_TWN	F	0:03:11.786-0:03:12.052	CS1b	5.77634	8	21.6396
Trial 1	1.1	S_TWN	F	0:03:12.052-0:03:12.318	CS1b	4.24854	8	15.9161
Trial 1	1.1	S_TWN	F	0:03:12.318-0:03:12.584	CS1b	0.546692	8	2.04805
Trial 1	1.1	S_TWN	F	0:03:12.584-0:03:12.850	CS1b	0.368173	8	1.37926
Trial 1	1.1	S_TWN	F	0:03:12.850-0:03:13.116	CS1b	0.966157	8	3.61948
Trial 1	1.1	S_TWN	F	0:03:13.116-0:03:13.382	CS1b	1.29727	8	4.85989
Trial 1	1.1	S_TWN	F	0:03:13.382-0:03:13.648	CS1b	0.63124	8	2.36477
Trial 1	1.1	S_TWN	F	0:03:13.648-0:03:13.914	CS1b	0.385911	8	1.44573
Trial 1	1.1	S_TWN	F	0:03:13.914-0:03:14.180	CS1b	1.1199	8	4.19542
Trial 1	1.1	S_TWN	F	0:03:14.180-0:03:14.446	CS1b	1.36701	8	5.12119
Trial 1	1.1	S_TWN	F	0:03:14.446-0:03:14.712	CS1b	0.647457	8	2.42553
Trial 1	1.1	S_TWN	F	0:03:14.712-0:03:14.978	CS1b	3.99843	8	14.9791
Trial 1	1.1	S_TWN	F	0:03:14.978-0:03:15.244	CS1b	1.07687	8	4.03424
Trial 1	1.1	S_TWN	F	0:03:15.244-0:03:15.510	CS1b	1.32985	8	4.98196
Trial 1	1.1	S_TWN	F	0:03:15.510-0:03:15.776	CS1b	0.984592	8	3.68853
Trial 1	1.1	S_TWN	F	0:03:15.776-0:03:16.042	CS1b	0.810763	8	3.03731
Trial 1	1.1	S_TWN	F	0:03:16.042-0:03:16.308	CS1b	0.957059	8	3.58538
Trial 1	1.1	S_TWN	F	0:03:16.308-0:03:16.574	CS1b	0.456664	8	1.71078
Trial 1	1.1	S_TWN	F	0:03:16.574-0:03:16.840	CS1b	0.90675	8	3.39691
Trial 1	1.1	S_TWN	F	0:03:16.840-0:03:17.106	CS1b	1.41109	8	5.2863
Trial 1	1.1	S_TWN	F	0:03:17.106-0:03:17.372	CS1b	0.501501	8	1.87874
Trial 1	1.1	S_TWN	F	0:03:17.372-0:03:17.638	CS1b	0.548946	8	2.05648
Trial 1	1.1	S_TWN	F	0:03:17.638-0:03:17.904	CS1b	1.09437	8	4.0998
Trial 1	1.1	S_TWN	F	0:03:17.904-0:03:18.170	CS1b	0.881141	8	3.30097
Trial 1	1.1	S_TWN	F	0:03:18.170-0:03:18.436	CS1b	1.47751	8	5.53513
Trial 1	1.1	S_TWN	F	0:03:18.436-0:03:18.702	CS1b	0.370981	8	1.38978
Trial 1	1.1	S_TWN	F	0:03:18.702-0:03:18.968	CS1b	1.033	8	3.86988
Trial 1	1.1	S_TWN	F	0:03:18.968-0:03:19.234	CS1b	1.26419	8	4.736
Trial 1	1.1	S_TWN	F	0:03:19.234-0:03:19.500	CS1b	1.70441	8	6.38516
Trial 1	1.1	S_TWN	F	0:03:19.500-0:03:19.766	CS1b	0.776348	7	3.32388
Trial 1	1.1	S_TWN	F	0:03:19.766-0:03:20.032	CS1b	1.79135	8	6.71081
Trial 1	1.1	S_TWN	F	0:03:20.032-0:03:20.298	IT1	0.323302	8	1.21116
Trial 1	1.1	S_TWN	F	0:03:20.298-0:03:20.564	IT1	0.65097	8	2.43871
Trial 1	1.1	S_TWN	F	0:03:20.564-0:03:20.830	IT1	1.24112	8	4.64958
Trial 1	1.1	S_TWN	F	0:03:20.830-0:03:21.096	IT1	0.61227	8	2.29371
Trial 1	1.1	S_TWN	F	0:03:21.096-0:03:21.362	IT1	0.201283	8	0.754056
Trial 1	1.1	S_TWN	F	0:03:21.362-0:03:21.628	IT1	0.213112	8	0.798371
Trial 1	1.1	S_TWN	F	0:03:21.628-0:03:21.894	IT1	0.474629	8	1.77809
Trial 1	1.1	S_TWN	F	0:03:21.894-0:03:22.160	IT1	0.49463	8	1.85301
Trial 1	1.1	S_TWN	F	0:03:22.160-0:03:22.426	IT1	0.342565	8	1.28333
Trial 1	1.1	S_TWN	F	0:03:22.426-0:03:22.692	IT1	0.264217	8	0.989826
Trial 1	1.1	S_TWN	F	0:03:22.692-0:03:22.958	IT1	0.366076	8	1.37141
Trial 1	1.1	S_TWN	F	0:03:22.958-0:03:23.224	IT1	0.197118	8	0.738456
Trial 1	1.1	S_TWN	F	0:03:23.224-0:03:23.490	IT1	0.107732	8	0.403592
Trial 1	1.1	S_TWN	F	0:03:23.490-0:03:23.756	IT1	0.222793	8	0.834637
Trial 1	1.1	S_TWN	F	0:03:23.756-0:03:24.022	IT1	0.437965	8	1.64072
Trial 1	1.1	S_TWN	F	0:03:24.022-0:03:24.288	IT1	0.422392	8	1.58237
Trial 1	1.1	S_TWN	F	0:03:24.288-0:03:24.554	IT1	0.255457	8	0.957004
Trial 1	1.1	S_TWN	F	0:03:24.554-0:03:24.820	IT1	0.632877	8	2.37091
Trial 1	1.1	S_TWN	F	0:03:24.820-0:03:25.086	IT1	0.700259	8	2.62334
Trial 1	1.1	S_TWN	F	0:03:25.086-0:03:25.352	IT1	0.476954	8	1.78679
Trial 1	1.1	S_TWN	F	0:03:25.352-0:03:25.618	IT1	0.577741	8	2.16435
Trial 1	1.1	S_TWN	F	0:03:25.618-0:03:25.884	IT1	1.01306	8	3.7952
Trial 1	1.1	S_TWN	F	0:03:25.884-0:03:26.150	IT1	0.525965	8	1.9704
Trial 1	1.1	S_TWN	F	0:03:26.150-0:03:26.416	IT1	0.379221	8	1.42066
Trial 1	1.1	S_TWN	F	0:03:26.416-0:03:26.682	IT1	0.231926	8	0.868856
Trial 1	1.1	S_TWN	F	0:03:26.682-0:03:26.948	IT1	0.111952	8	0.419398
Trial 1	1.1	S_TWN	F	0:03:26.948-0:03:27.214	IT1	0.209832	8	0.786076
Trial 1	1.1	S_TWN	F	0:03:27.214-0:03:27.480	IT1	0.196426	8	0.735861
Trial 1	1.1	S_TWN	F	0:03:27.480-0:03:27.746	IT1	0.161042	8	0.603306
Trial 1	1.1	S_TWN	F	0:03:27.746-0:03:28.012	IT1	0.312767	8	1.1717
Trial 1	1.1	S_TWN	F	0:03:28.012-0:03:28.278	IT1	0.171632	8	0.642975
Trial 1	1.1	S_TWN	F	0:03:28.278-0:03:28.544	IT1	0.243066	8	0.910592
Trial 1	1.1	S_TWN	F	0:03:28.544-0:03:28.810	IT1	0.170342	8	0.638147
Trial 1	1.1	S_TWN	F	0:03:28.810-0:03:29.076	IT1	0.0666709	8	0.249767
Trial 1	1.1	S_TWN	F	0:03:29.076-0:03:29.342	IT1	0.0593146	7	0.253951
Trial 1	1.1	S_TWN	F	0:03:29.342-0:03:29.608	IT1	0.0573734	8	0.214937
Trial 1	1.1	S_TWN	F	0:03:29.608-0:03:29.874	IT1	0.0993579	8	0.372219
Trial 1	1.1	S_TWN	F	0:03:29.874-0:03:30.140	IT1	0.0376688	8	0.141116
Trial 1	1.1	S_TWN	F	0:03:30.140-0:03:30.406	IT1	0.117245	8	0.439225
Trial 1	1.1	S_TWN	F	0:03:30.406-0:03:30.672	IT1	0.118428	8	0.443659
Trial 1	1.1	S_TWN	F	0:03:30.672-0:03:30.938	IT1	0.131253	8	0.491706
Trial 1	1.1	S_TWN	F	0:03:30.938-0:03:31.204	IT1	0.0734302	8	0.275088
Trial 1	1.1	S_TWN	F	0:03:31.204-0:03:31.470	IT1	0.0870898	8	0.326259
Trial 1	1.1	S_TWN	F	0:03:31.470-0:03:31.736	IT1	0.071539	8	0.268002
Trial 1	1.1	S_TWN	F	0:03:31.736-0:03:32.002	IT1	0.0293085	8	0.109797
Trial 1	1.1	S_TWN	F	0:03:32.002-0:03:32.268	IT1	0.101441	8	0.380024
Trial 1	1.1	S_TWN	F	0:03:32.268-0:03:32.534	IT1	0.260304	8	0.975162
Trial 1	1.1	S_TWN	F	0:03:32.534-0:03:32.800	IT1	0.30666	8	1.14883
Trial 1	1.1	S_TWN	F	0:03:32.800-0:03:33.066	IT1	0.200186	8	0.749942
Trial 1	1.1	S_TWN	F	0:03:33.066-0:03:33.332	IT1	0.226859	8	0.849867
Trial 1	1.1	S_TWN	F	0:03:33.332-0:03:33.598	IT1	0.142364	8	0.533332
Trial 1	1.1	S_TWN	F	0:03:33.598-0:03:33.864	IT1	0.0896194	8	0.335734
Trial 1	1.1	S_TWN	F	0:03:33.864-0:03:34.130	IT1	0.0791977	8	0.296694
Trial 1	1.1	S_TWN	F	0:03:34.130-0:03:34.396	IT1	0.0505566	8	0.189397
Trial 1	1.1	S_TWN	F	0:03:34.396-0:03:34.662	IT1	0.0965415	8	0.361667
Trial 1	1.1	S_TWN	F	0:03:34.662-0:03:34.928	IT1	0.0415148	8	0.155526
Trial 1	1.1	S_TWN	F	0:03:34.928-0:03:35.194	IT1	0.0689902	8	0.258456
Trial 1	1.1	S_TWN	F	0:03:35.194-0:03:35.460	IT1	0.0208885	8	0.0782539
Trial 1	1.1	S_TWN	F	0:03:35.460-0:03:35.726	IT1	0.0895613	8	0.335518
Trial 1	1.1	S_TWN	F	0:03:35.726-0:03:35.992	IT1	0.0649329	8	0.243255
Trial 1	1.1	S_TWN	F	0:03:35.992-0:03:36.258	IT1	0.0595068	8	0.222927
Trial 1	1.1	S_TWN	F	0:03:36.258-0:03:36.524	IT1	0.215584	8	0.807625
Trial 1	1.1	S_TWN	F	0:03:36.524-0:03:36.790	IT1	0.156329	8	0.585644
Trial 1	1.1	S_TWN	F	0:03:36.790-0:03:37.056	IT1	0.283983	8	1.06387
Trial 1	1.1	S_TWN	F	0:03:37.056-0:03:37.322	IT1	0.0804197	8	0.301271
Trial 1	1.1	S_TWN	F	0:03:37.322-0:03:37.588	IT1	0.319714	8	1.19772
Trial 1	1.1	S_TWN	F	0:03:37.588-0:03:37.854	IT1	0.0704091	8	0.263769
Trial 1	1.1	S_TWN	F	0:03:37.854-0:03:38.120	IT1	0.201742	8	0.755776
Trial 1	1.1	S_TWN	F	0:03:38.120-0:03:38.386	IT1	0.142359	8	0.53331
Trial 1	1.1	S_TWN	F	0:03:38.386-0:03:38.652	IT1	0.167638	8	0.628007
Trial 1	1.1	S_TWN	F	0:03:38.652-0:03:38.918	IT1	0.120785	7	0.517133
Trial 1	1.1	S_TWN	F	0:03:38.918-0:03:39.184	IT1	0.0541602	8	0.202897
Trial 1	1.1	S_TWN	F	0:03:39.184-0:03:39.450	IT1	0.254179	8	0.952223
Trial 1	1.1	S_TWN	F	0:03:39.450-0:03:39.716	IT1	0.108653	8	0.407043
Trial 1	1.1	S_TWN	F	0:03:39.716-0:03:39.982	IT1	0.349796	8	1.31042
Trial 1	1.1	S_TWN	F	0:03:39.982-0:03:40.248	IT1	0.0783465	8	0.293506
Trial 1	1.1	S_TWN	F	0:03:40.248-0:03:40.514	IT1	0.0843875	8	0.316137
Trial 1	1.1	S_TWN	F	0:03:40.514-0:03:40.780	IT1	0.0735632	8	0.275585
Trial 1	1.1	S_TWN	F	0:03:40.780-0:03:41.046	IT1	0.0881353	8	0.330177
Trial 1	1.1	S_TWN	F	0:03:41.046-0:03:41.312	IT1	0.0590713	8	0.221295
Trial 1	1.1	S_TWN	F	0:03:41.312-0:03:41.578	IT1	0.0772444	8	0.289376
Trial 1	1.1	S_TWN	F	0:03:41.578-0:03:41.844	IT1	0.104532	8	0.391603
Trial 1	1.1	S_TWN	F	0:03:41.844-0:03:42.110	IT1	0.0654638	8	0.245244
Trial 1	1.1	S_TWN	F	0:03:42.110-0:03:42.376	IT1	0.0549461	8	0.205842
Trial 1	1.1	S_TWN	F	0:03:42.376-0:03:42.642	IT1	0.0436594	8	0.163558
Trial 1	1.1	S_TWN	F	0:03:42.642-0:03:42.908	IT1	0.124699	8	0.467153
Trial 1	1.1	S_TWN	F	0:03:42.908-0:03:43.174	IT1	0.042971	8	0.16098
Trial 1	1.1	S_TWN	F	0:03:43.174-0:03:43.440	IT1	0.102548	8	0.38417
Trial 1	1.1	S_TWN	F	0:03:43.440-0:03:43.706	IT1	0.117417	8	0.439874
Trial 1	1.1	S_TWN	F	0:03:43.706-0:03:43.972	IT1	0.0605862	8	0.22697
Trial 1	1.1	S_TWN	F	0:03:43.972-0:03:44.238	IT1	0.148104	8	0.554838
Trial 1	1.1	S_TWN	F	0:03:44.238-0:03:44.504	IT1	0.0320407	8	0.120033
Trial 1	1.1	S_TWN	F	0:03:44.504-0:03:44.770	IT1	0.0912105	8	0.341696
Trial 1	1.1	S_TWN	F	0:03:44.770-0:03:45.036	IT1	0.322693	8	1.20889
Trial 1	1.1	S_TWN	F	0:03:45.036-0:03:45.302	IT1	0.180566	8	0.676441
Trial 1	1.1	S_TWN	F	0:03:45.302-0:03:45.568	IT1	0.144833	8	0.542581
Trial 1	1.1	S_TWN	F	0:03:45.568-0:03:45.834	IT1	0.127157	8	0.476362
Trial 1	1.1	S_TWN	F	0:03:45.834-0:03:46.100	IT1	0.354192	8	1.32689
Trial 1	1.1	S_TWN	F	0:03:46.100-0:03:46.366	IT1	0.13123	8	0.491622
Trial 1	1.1	S_TWN	F	0:03:46.366-0:03:46.632	IT1	0.39939	8	1.49621
Trial 1	1.1	S_TWN	F	0:03:46.632-0:03:46.898	IT1	0.127652	8	0.478215
Trial 1	1.1	S_TWN	F	0:03:46.898-0:03:47.164	IT1	0.0648802	8	0.243057
Trial 1	1.1	S_TWN	F	0:03:47.164-0:03:47.430	IT1	0.0757338	8	0.283716
Trial 1	1.1	S_TWN	F	0:03:47.430-0:03:47.696	IT1	0.128351	8	0.480834
Trial 1	1.1	S_TWN	F	0:03:47.696-0:03:47.962	IT1	0.0581803	8	0.217957
Trial 1	1.1	S_TWN	F	0:03:47.962-0:03:48.228	IT1	0.0326978	7	0.139994
Trial 1	1.1	S_TWN	F	0:03:48.228-0:03:48.494	IT1	0.0614203	8	0.230096
Trial 1	1.1	S_TWN	F	0:03:48.494-0:03:48.760	IT1	0.0353903	8	0.132582
Trial 1	1.1	S_TWN	F	0:03:48.760-0:03:49.026	IT1	0.0479085	8	0.179476
Trial 1	1.1	S_TWN	F	0:03:49.026-0:03:49.292	IT1	0.383931	8	1.4383
Trial 1	1.1	S_TWN	F	0:03:49.292-0:03:49.558	IT1	0.130775	8	0.489916
Trial 1	1.1	S_TWN	F	0:03:49.558-0:03:49.824	IT1	0.0768192	8	0.287785
Trial 1	1.1	S_TWN	F	0:03:49.824-0:03:50.090	IT1	0.127485	8	0.477595
Trial 1	1.1	S_TWN	F	0:03:50.090-0:03:50.356	IT1	0.0807178	8	0.302388
Trial 1	1.1	S_TWN	F	0:03:50.356-0:03:50.622	IT1	0.0559921	8	0.20976
Trial 1	1.1	S_TWN	F	0:03:50.622-0:03:50.888	IT1	0.0949361	8	0.355654
Trial 1	1.1	S_TWN	F	0:03:50.888-0:03:51.154	IT1	0.0353452	8	0.132412
Trial 1	1.1	S_TWN	F	0:03:51.154-0:03:51.420	IT1	0.0776803	8	0.291009
Trial 1	1.1	S_TWN	F	0:03:51.420-0:03:51.686	IT1	0.0627552	8	0.235096
Trial 1	1.1	S_TWN	F	0:03:51.686-0:03:51.952	IT1	0.0696567	8	0.260951
Trial 1	1.1	S_TWN	F	0:03:51.952-0:03:52.218	IT1	0.0617713	8	0.231409
Trial 1	1.1	S_TWN	F	0:03:52.218-0:03:52.484	IT1	0.0643907	8	0.241223
Trial 1	1.1	S_TWN	F	0:03:52.484-0:03:52.750	IT1	0.0435774	8	0.163251
Trial 1	1.1	S_TWN	F	0:03:52.750-0:03:53.016	IT1	0.0309897	8	0.116095
Trial 1	1.1	S_TWN	F	0:03:53.016-0:03:53.282	IT1	0.069443	8	0.260153
Trial 1	1.1	S_TWN	F	0:03:53.282-0:03:53.548	IT1	0.0606246	8	0.227115
Trial 1	1.1	S_TWN	F	0:03:53.548-0:03:53.814	IT1	0.140955	8	0.528053
Trial 1	1.1	S_TWN	F	0:03:53.814-0:03:54.080	IT1	0.101385	8	0.379811
Trial 1	1.1	S_TWN	F	0:03:54.080-0:03:54.346	IT1	0.217144	8	0.81347
Trial 1	1.1	S_TWN	F	0:03:54.346-0:03:54.612	IT1	0.166944	8	0.625412
Trial 1	1.1	S_TWN	F	0:03:54.612-0:03:54.878	IT1	0.260315	8	0.975199
Trial 1	1.1	S_TWN	F	0:03:54.878-0:03:55.144	IT1	0.0810808	8	0.30375
Trial 1	1.1	S_TWN	F	0:03:55.144-0:03:55.410	IT1	0.0403395	8	0.151122
Trial 1	1.1	S_TWN	F	0:03:55.410-0:03:55.676	IT1	0.0509726	8	0.190955
Trial 1	1.1	S_TWN	F	0:03:55.676-0:03:55.942	IT1	0.0243617	8	0.0912655
Trial 1	1.1	S_TWN	F	0:03:55.942-0:03:56.208	IT1	0.0447985	8	0.167827
Trial 1	1.1	S_TWN	F	0:03:56.208-0:03:56.474	IT1	0.0237649	8	0.0890294
Trial 1	1.1	S_TWN	F	0:03:56.474-0:03:56.740	IT1	0.0600021	8	0.224782
Trial 1	1.1	S_TWN	F	0:03:56.740-0:03:57.006	IT1	0.0179247	8	0.0671502
Trial 1	1.1	S_TWN	F	0:03:57.006-0:03:57.272	IT1	0.0427602	8	0.160191
Trial 1	1.1	S_TWN	F	0:03:57.272-0:03:57.538	IT1	0.0536363	8	0.200934
Trial 1	1.1	S_TWN	F	0:03:57.538-0:03:57.804	IT1	0.0130637	7	0.0559317
Trial 1	1.1	S_TWN	F	0:03:57.804-0:03:58.070	IT1	0.0395809	8	0.14828
Trial 1	1.1	S_TWN	F	0:03:58.070-0:03:58.336	IT1	0.0159952	8	0.059922
Trial 1	1.1	S_TWN	F	0:03:58.336-0:03:58.602	IT1	0.0313445	8	0.117424
Trial 1	1.1	S_TWN	F	0:03:58.602-0:03:58.868	IT1	0.0264355	8	0.0990342
Trial 1	1.1	S_TWN	F	0:03:58.868-0:03:59.134	IT1	0.0476698	8	0.178584
Trial 1	1.1	S_TWN	F	0:03:59.134-0:03:59.400	IT1	0.0321317	8	0.120375
Trial 1	1.1	S_TWN	F	0:03:59.400-0:03:59.666	IT1	0.0229685	8	0.0860453
Trial 1	1.1	S_TWN	F	0:03:59.666-0:03:59.932	IT1	0.0273389	8	0.102418
Trial 1	1.1	S_TWN	F	0:03:59.932-0:04:00.198	IT1	0.0537099	8	0.201212
Trial 1	1.1	S_TWN	F	0:04:00.198-0:04:00.464	IT1	0.0448589	8	0.168053
Trial 1	1.1	S_TWN	F	0:04:00.464-0:04:00.730	IT1	0.044488	8	0.166664
Trial 1	1.1	S_TWN	F	0:04:00.730-0:04:00.996	IT1	0.0581155	8	0.217714
Trial 1	1.1	S_TWN	F	0:04:00.996-0:04:01.262	IT1	0.0490747	8	0.183846
Trial 1	1.1	S_TWN	F	0:04:01.262-0:04:01.528	IT1	0.0339364	8	0.127135
Trial 1	1.1	S_TWN	F	0:04:01.528-0:04:01.794	IT1	0.0506659	8	0.189807
Trial 1	1.1	S_TWN	F	0:04:01.794-0:04:02.060	IT1	0.0410959	8	0.153956
Trial 1	1.1	S_TWN	F	0:04:02.060-0:04:02.326	IT1	0.0969936	8	0.363362
Trial 1	1.1	S_TWN	F	0:04:02.326-0:04:02.592	IT1	0.0469235	8	0.175787
Trial 1	1.1	S_TWN	F	0:04:02.592-0:04:02.858	IT1	0.0752536	8	0.281919
Trial 1	1.1	S_TWN	F	0:04:02.858-0:04:03.124	IT1	0.0276021	8	0.103404
Trial 1	1.1	S_TWN	F	0:04:03.124-0:04:03.390	IT1	0.0475299	8	0.178059
Trial 1	1.1	S_TWN	F	0:04:03.390-0:04:03.656	IT1	0.034851	8	0.13056
Trial 1	1.1	S_TWN	F	0:04:03.656-0:04:03.922	IT1	0.0534743	8	0.200327
Trial 1	1.1	S_TWN	F	0:04:03.922-0:04:04.188	IT1	0.0265059	8	0.0992984
Trial 1	1.1	S_TWN	F	0:04:04.188-0:04:04.454	IT1	0.0477254	8	0.178791
Trial 1	1.1	S_TWN	F	0:04:04.454-0:04:04.720	IT1	0.0346669	8	0.129872
Trial 1	1.1	S_TWN	F	0:04:04.720-0:04:04.986	IT1	0.0502364	8	0.188197
Trial 1	1.1	S_TWN	F	0:04:04.986-0:04:05.252	IT1	0.0489436	8	0.183356
Trial 1	1.1	S_TWN	F	0:04:05.252-0:04:05.518	IT1	0.0358659	8	0.134363
Trial 1	1.1	S_TWN	F	0:04:05.518-0:04:05.784	IT1	0.0378908	8	0.141949
Trial 1	1.1	S_TWN	F	0:04:05.784-0:04:06.050	IT1	0.030291	8	0.113479
Trial 1	1.1	S_TWN	F	0:04:06.050-0:04:06.316	IT1	0.0378484	8	0.141789
Trial 1	1.1	S_TWN	F	0:04:06.316-0:04:06.582	IT1	0.0345416	8	0.129401
Trial 1	1.1	S_TWN	F	0:04:06.582-0:04:06.848	IT1	0.0150358	8	0.0563278
Trial 1	1.1	S_TWN	F	0:04:06.848-0:04:07.114	IT1	0.0521468	8	0.195356
Trial 1	1.1	S_TWN	F	0:04:07.114-0:04:07.380	IT1	0.0398598	7	0.170657
Trial 1	1.1	S_TWN	F	0:04:07.380-0:04:07.646	IT1	0.0430766	8	0.161375
Trial 1	1.1	S_TWN	F	0:04:07.646-0:04:07.912	IT1	0.036243	8	0.135775
Trial 1	1.1	S_TWN	F	0:04:07.912-0:04:08.178	IT1	0.0396359	8	0.148486
Trial 1	1.1	S_TWN	F	0:04:08.178-0:04:08.444	IT1	0.0417973	8	0.156583
Trial 1	1.1	S_TWN	F	0:04:08.444-0:04:08.710	IT1	0.0643474	8	0.24106
Trial 1	1.1	S_TWN	F	0:04:08.710-0:04:08.976	IT1	0.0510731	8	0.191333
Trial 1	1.1	S_TWN	F	0:04:08.976-0:04:09.242	IT1	0.0206016	8	0.0771784
Trial 1	1.1	S_TWN	F	0:04:09.242-0:04:09.508	IT1	0.0465207	8	0.174277
Trial 1	1.1	S_TWN	F	0:04:09.508-0:04:09.774	IT1	0.0175902	8	0.0658976
Trial 1	1.1	S_TWN	F	0:04:09.774-0:04:10.040	IT1	0.0400645	8	0.150091
Trial 1	1.1	S_TWN	F	0:04:10.040-0:04:10.306	IT1	0.0193171	8	0.0723667
Trial 1	1.1	S_TWN	F	0:04:10.306-0:04:10.572	IT1	0.0391124	8	0.146524
Trial 1	1.1	S_TWN	F	0:04:10.572-0:04:10.838	IT1	0.0264028	8	0.0989113
Trial 1	1.1	S_TWN	F	0:04:10.838-0:04:11.104	IT1	0.0357076	8	0.13377
Trial 1	1.1	S_TWN	F	0:04:11.104-0:04:11.370	IT1	0.0356211	8	0.133445
Trial 1	1.1	S_TWN	F	0:04:11.370-0:04:11.636	IT1	0.0363978	8	0.136355
Trial 1	1.1	S_TWN	F	0:04:11.636-0:04:11.902	IT1	0.0588232	8	0.220366
Trial 1	1.1	S_TWN	F	0:04:11.902-0:04:12.168	IT1	0.0339981	8	0.127365
Trial 1	1.1	S_TWN	F	0:04:12.168-0:04:12.434	IT1	0.0671591	8	0.251593
Trial 1	1.1	S_TWN	F	0:04:12.434-0:04:12.700	IT1	0.0426979	8	0.159957
Trial 1	1.1	S_TWN	F	0:04:12.700-0:04:12.966	IT1	0.203555	8	0.762565
Trial 1	1.1	S_TWN	F	0:04:12.966-0:04:13.232	IT1	0.182856	8	0.685022
Trial 1	1.1	S_TWN	F	0:04:13.232-0:04:13.498	IT1	0.17201	8	0.644392
Trial 1	1.1	S_TWN	F	0:04:13.498-0:04:13.764	IT1	0.19704	8	0.738158
Trial 1	1.1	S_TWN	F	0:04:13.764-0:04:14.030	IT1	0.0360404	8	0.135016
Trial 1	1.1	S_TWN	F	0:04:14.030-0:04:14.296	IT1	0.0473708	8	0.177464
Trial 1	1.1	S_TWN	F	0:04:14.296-0:04:14.562	IT1	0.0192418	8	0.0720844
Trial 1	1.1	S_TWN	F	0:04:14.562-0:04:14.828	IT1	0.065765	8	0.246372
Trial 1	1.1	S_TWN	F	0:04:14.828-0:04:15.094	IT1	0.0448922	8	0.168177
Trial 1	1.1	S_TWN	F	0:04:15.094-0:04:15.360	IT1	0.0485801	8	0.181995
Trial 1	1.1	S_TWN	F	0:04:15.360-0:04:15.626	IT1	0.0338749	8	0.126905
Trial 1	1.1	S_TWN	F	0:04:15.626-0:04:15.892	IT1	0.0397938	8	0.149077
Trial 1	1.1	S_TWN	F	0:04:15.892-0:04:16.158	IT1	0.0483532	8	0.181144
Trial 1	1.1	S_TWN	F	0:04:16.158-0:04:16.424	IT1	0.0381978	8	0.143098
Trial 1	1.1	S_TWN	F	0:04:16.424-0:04:16.690	IT1	0.0692092	7	0.296314
Trial 1	1.1	S_TWN	F	0:04:16.690-0:04:16.956	IT1	0.0281267	8	0.10537
Trial 1	1.1	S_TWN	F	0:04:16.956-0:04:17.222	IT1	0.0397851	8	0.149046
Trial 1	1.1	S_TWN	F	0:04:17.222-0:04:17.488	IT1	0.0168981	8	0.0633043
Trial 1	1.1	S_TWN	F	0:04:17.488-0:04:17.754	IT1	0.0486737	8	0.182344
Trial 1	1.1	S_TWN	F	0:04:17.754-0:04:18.020	IT1	0.0269561	8	0.100984
Trial 1	1.1	S_TWN	F	0:04:18.020-0:04:18.286	IT1	0.0469974	8	0.176063
Trial 1	1.1	S_TWN	F	0:04:18.286-0:04:18.552	IT1	0.0807314	8	0.30244
Trial 1	1.1	S_TWN	F	0:04:18.552-0:04:18.818	IT1	0.0304757	8	0.114169
Trial 1	1.1	S_TWN	F	0:04:18.818-0:04:19.084	IT1	0.0851436	8	0.318968
Trial 1	1.1	S_TWN	F	0:04:19.084-0:04:19.350	IT1	0.0484866	8	0.181642
Trial 1	1.1	S_TWN	F	0:04:19.350-0:04:19.616	IT1	0.0678591	8	0.254216
Trial 1	1.1	S_TWN	F	0:04:19.616-0:04:19.882	IT1	0.02226	8	0.0833919
Trial 1	1.1	S_TWN	F	0:04:19.882-0:04:20.148	IT1	0.0527717	8	0.197696
Trial 1	1.1	S_TWN	F	0:04:20.148-0:04:20.414	IT1	0.0301494	8	0.112948
Trial 1	1.1	S_TWN	F	0:04:20.414-0:04:20.680	IT1	0.0291444	8	0.109182
Trial 1	1.1	S_TWN	F	0:04:20.680-0:04:20.946	IT1	0.0394842	8	0.147918
Trial 1	1.1	S_TWN	F	0:04:20.946-0:04:21.212	IT1	0.0223419	8	0.0836981
Trial 1	1.1	S_TWN	F	0:04:21.212-0:04:21.478	IT1	0.0375706	8	0.140749
Trial 1	1.1	S_TWN	F	0:04:21.478-0:04:21.744	IT1	0.0229597	8	0.0860125
Trial 1	1.1	S_TWN	F	0:04:21.744-0:04:22.010	IT1	0.0476005	8	0.178323
Trial 1	1.1	S_TWN	F	0:04:22.010-0:04:22.276	IT1	0.0361524	8	0.135436
Trial 1	1.1	S_TWN	F	0:04:22.276-0:04:22.542	IT1	0.0462434	8	0.173238
Trial 1	1.1	S_TWN	F	0:04:22.542-0:04:22.808	IT1	0.0624397	8	0.233913
Trial 1	1.1	S_TWN	F	0:04:22.808-0:04:23.074	IT1	0.0492406	8	0.184469
Trial 1	1.1	S_TWN	F	0:04:23.074-0:04:23.340	IT1	0.275959	8	1.03381
Trial 1	1.1	S_TWN	F	0:04:23.340-0:04:23.606	IT1	0.0752915	8	0.282061
Trial 1	1.1	S_TWN	F	0:04:23.606-0:04:23.872	IT1	0.0698693	8	0.261747
Trial 1	1.1	S_TWN	F	0:04:23.872-0:04:24.138	IT1	0.037714	8	0.141285
Trial 1	1.1	S_TWN	F	0:04:24.138-0:04:24.404	IT1	0.0700942	8	0.26259
Trial 1	1.1	S_TWN	F	0:04:24.404-0:04:24.670	IT1	0.0605259	8	0.226745
Trial 1	1.1	S_TWN	F	0:04:24.670-0:04:24.936	IT1	0.0349664	8	0.130992
Trial 1	1.1	S_TWN	F	0:04:24.936-0:04:25.202	IT1	0.043543	8	0.163123
Trial 1	1.1	S_TWN	F	0:04:25.202-0:04:25.468	IT1	0.0281149	8	0.105326
Trial 1	1.1	S_TWN	F	0:04:25.468-0:04:25.734	IT1	0.0369444	8	0.138405
Trial 1	1.1	S_TWN	F	0:04:25.734-0:04:26.000	IT1	0.0296361	8	0.111025
Trial 1	1.1	S_TWN	F	0:04:26.000-0:04:26.266	IT1	0.065027	7	0.27841
Trial 1	1.1	S_TWN	F	0:04:26.266-0:04:26.532	IT1	0.0309678	8	0.116013
Trial 1	1.1	S_TWN	F	0:04:26.532-0:04:26.798	IT1	0.0360993	8	0.135236
Trial 1	1.1	S_TWN	F	0:04:26.798-0:04:27.064	IT1	0.0130173	8	0.048766
Trial 1	1.1	S_TWN	F	0:04:27.064-0:04:27.330	IT1	0.0261582	8	0.0979954
Trial 1	1.1	S_TWN	F	0:04:27.330-0:04:27.596	IT1	0.0520772	8	0.195093
Trial 1	1.1	S_TWN	F	0:04:27.596-0:04:27.862	IT1	0.0381873	8	0.14306
Trial 1	1.1	S_TWN	F	0:04:27.862-0:04:28.128	IT1	0.0745947	8	0.279451
Trial 1	1.1	S_TWN	F	0:04:28.128-0:04:28.394	IT1	0.0312499	8	0.11707
Trial 1	1.1	S_TWN	F	0:04:28.394-0:04:28.660	IT1	0.080531	8	0.301689
Trial 1	1.1	S_TWN	F	0:04:28.660-0:04:28.926	IT1	0.0283788	8	0.106314
Trial 1	1.1	S_TWN	F	0:04:28.926-0:04:29.192	IT1	0.0516819	8	0.193614
Trial 1	1.1	S_TWN	F	0:04:29.192-0:04:29.458	IT1	0.0294799	8	0.110439
Trial 1	1.1	S_TWN	F	0:04:29.458-0:04:29.724	IT1	0.0544487	8	0.203977
Trial 1	1.1	S_TWN	F	0:04:29.724-0:04:29.990	IT1	0.0656072	8	0.245781
Trial 1	1.1	S_TWN	F	0:04:29.990-0:04:30.256	IT1	0.0514678	8	0.19281
Trial 1	1.1	S_TWN	F	0:04:30.256-0:04:30.522	CS2a	0.0814298	8	0.305056
Trial 1	1.1	S_TWN	F	0:04:30.522-0:04:30.788	CS2a	0.0613376	8	0.229785
Trial 1	1.1	S_TWN	F	0:04:30.788-0:04:31.054	CS2a	0.0874603	8	0.327647
Trial 1	1.1	S_TWN	F	0:04:31.054-0:04:31.320	CS2a	0.0406071	8	0.152125
Trial 1	1.1	S_TWN	F	0:04:31.320-0:04:31.586	CS2a	0.0566757	8	0.21232
Trial 1	1.1	S_TWN	F	0:04:31.586-0:04:31.852	CS2a	0.0388088	8	0.145388
Trial 1	1.1	S_TWN	F	0:04:31.852-0:04:32.118	CS2a	0.0382743	8	0.143385
Trial 1	1.1	S_TWN	F	0:04:32.118-0:04:32.384	CS2a	0.0454566	8	0.170291
Trial 1	1.1	S_TWN	F	0:04:32.384-0:04:32.650	CS2a	0.0329221	8	0.123335
Trial 1	1.1	S_TWN	F	0:04:32.650-0:04:32.916	CS2a	0.0510577	8	0.191276
Trial 1	1.1	S_TWN	F	0:04:32.916-0:04:33.182	CS2a	0.0183034	8	0.0685694
Trial 1	1.1	S_TWN	F	0:04:33.182-0:04:33.448	CS2a	0.0380497	8	0.142544
Trial 1	1.1	S_TWN	F	0:04:33.448-0:04:33.714	CS2a	0.0105239	8	0.0394248
Trial 1	1.1	S_TWN	F	0:04:33.714-0:04:33.980	CS2a	0.0780255	8	0.292303
Trial 1	1.1	S_TWN	F	0:04:33.980-0:04:34.246	CS2a	0.0368349	8	0.137993
Trial 1	1.1	S_TWN	F	0:04:34.246-0:04:34.512	CS2a	0.0391499	8	0.146666
Trial 1	1.1	S_TWN	F	0:04:34.512-0:04:34.778	CS2a	0.051519	8	0.193003
Trial 1	1.1	S_TWN	F	0:04:34.778-0:04:35.044	CS2a	0.0396642	8	0.148592
Trial 1	1.1	S_TWN	F	0:04:35.044-0:04:35.310	CS2a	0.0660929	8	0.247601
Trial 1	1.1	S_TWN	F	0:04:35.310-0:04:35.576	CS2a	0.0284933	8	0.106743
Trial 1	1.1	S_TWN	F	0:04:35.576-0:04:35.842	CS2a	0.0417895	7	0.178919
Trial 1	1.1	S_TWN	F	0:04:35.842-0:04:36.108	CS2a	0.0221804	8	0.0830936
Trial 1	1.1	S_TWN	F	0:04:36.108-0:04:36.374	CS2a	0.0564802	8	0.211588
Trial 1	1.1	S_TWN	F	0:04:36.374-0:04:36.640	CS2a	0.0318659	8	0.119377
Trial 1	1.1	S_TWN	F	0:04:36.640-0:04:36.906	CS2a	0.0266961	8	0.10001
Trial 1	1.1	S_TWN	F	0:04:36.906-0:04:37.172	CS2a	0.0350918	8	0.131462
Trial 1	1.1	S_TWN	F	0:04:37.172-0:04:37.438	CS2a	0.021747	8	0.0814702
Trial 1	1.1	S_TWN	F	0:04:37.438-0:04:37.704	CS2a	0.0678522	8	0.254191
Trial 1	1.1	S_TWN	F	0:04:37.704-0:04:37.970	CS2a	0.0232034	8	0.0869256
Trial 1	1.1	S_TWN	F	0:04:37.970-0:04:38.236	CS2a	0.0733345	8	0.274731
Trial 1	1.1	S_TWN	F	0:04:38.236-0:04:38.502	CS2a	0.0286735	8	0.107418
Trial 1	1.1	S_TWN	F	0:04:38.502-0:04:38.768	CS2a	0.0639611	8	0.239615
Trial 1	1.1	S_TWN	F	0:04:38.768-0:04:39.034	CS2a	0.0355955	8	0.133349
Trial 1	1.1	S_TWN	F	0:04:39.034-0:04:39.300	CS2a	0.0351288	8	0.1316
Trial 1	1.1	S_TWN	F	0:04:39.300-0:04:39.566	CS2a	0.0456533	8	0.171029
Trial 1	1.1	S_TWN	F	0:04:39.566-0:04:39.832	CS2a	0.0309852	8	0.116078
Trial 1	1.1	S_TWN	F	0:04:39.832-0:04:40.098	CS2a	0.0605922	8	0.226993
Trial 1	1.1	S_TWN	F	0:04:40.098-0:04:40.364	CS2b	0.682448	8	2.55661
Trial 1	1.1	S_TWN	F	0:04:40.364-0:04:40.630	CS2b	0.919744	8	3.4456
Trial 1	1.1	S_TWN	F	0:04:40.630-0:04:40.896	CS2b	0.539153	8	2.01981
Trial 1	1.1	S_TWN	F	0:04:40.896-0:04:41.162	CS2b	0.232603	8	0.871388
Trial 1	1.1	S_TWN	F	0:04:41.162-0:04:41.428	CS2b	0.341251	8	1.27841
Trial 1	1.1	S_TWN	F	0:04:41.428-0:04:41.694	CS2b	0.168059	8	0.629589
Trial 1	1.1	S_TWN	F	0:04:41.694-0:04:41.960	CS2b	0.175147	8	0.656144
Trial 1	1.1	S_TWN	F	0:04:41.960-0:04:42.226	CS2b	0.263562	8	0.987376
Trial 1	1.1	S_TWN	F	0:04:42.226-0:04:42.492	CS2b	0.18986	8	0.711266
Trial 1	1.1	S_TWN	F	0:04:42.492-0:04:42.758	CS2b	0.118902	8	0.445435
Trial 1	1.1	S_TWN	F	0:04:42.758-0:04:43.024	CS2b	1.27326	8	4.76994
Trial 1	1.1	S_TWN	F	0:04:43.024-0:04:43.290	CS2b	0.611666	8	2.29146
Trial 1	1.1	S_TWN	F	0:04:43.290-0:04:43.556	CS2b	0.230666	8	0.864134
Trial 1	1.1	S_TWN	F	0:04:43.556-0:04:43.822	CS2b	0.071034	8	0.266111
Trial 1	1.1	S_TWN	F	0:04:43.822-0:04:44.088	CS2b	0.071034	8	0.266112
Trial 1	1.1	S_TWN	F	0:04:44.088-0:04:44.354	CS2b	0.071034	8	0.266111
Trial 1	1.1	S_TWN	F	0:04:44.354-0:04:44.620	CS2b	0.0937991	8	0.351397
Trial 1	1.1	S_TWN	F	0:04:44.620-0:04:44.886	CS2b	0.027242	8	0.102056
Trial 1	1.1	S_TWN	F	0:04:44.886-0:04:45.152	CS2b	0.027242	8	0.102055
Trial 1	1.1	S_TWN	F	0:04:45.152-0:04:45.418	CS2b	0.0238368	7	0.102055
Trial 1	1.1	S_TWN	F	0:04:45.418-0:04:45.684	CS2b	0.027242	8	0.102056
Trial 1	1.1	S_TWN	F	0:04:45.684-0:04:45.950	CS2b	0.513386	8	1.92327
Trial 1	1.1	S_TWN	F	0:04:45.950-0:04:46.216	CS2b	0.391866	8	1.46803
Trial 1	1.1	S_TWN	F	0:04:46.216-0:04:46.482	CS2b	0.162254	8	0.607842
Trial 1	1.1	S_TWN	F	0:04:46.482-0:04:46.748	CS2b	0.162254	8	0.607842
Trial 1	1.1	S_TWN	F	0:04:46.748-0:04:47.014	CS2b	0.162254	8	0.607844
Trial 1	1.1	S_TWN	F	0:04:47.014-0:04:47.280	CS2b	0.162254	8	0.607842
Trial 1	1.1	S_TWN	F	0:04:47.280-0:04:47.546	CS2b	0.162254	8	0.607844
Trial 1	1.1	S_TWN	F	0:04:47.546-0:04:47.812	CS2b	0.162254	8	0.607842
Trial 1	1.1	S_TWN	F	0:04:47.812-0:04:48.078	CS2b	0.338906	8	1.26962
Trial 1	1.1	S_TWN	F	0:04:48.078-0:04:48.344	CS2b	0.105833	8	0.396478
Trial 1	1.1	S_TWN	F	0:04:48.344-0:04:48.610	CS2b	0.105833	8	0.396477
Trial 1	1.1	S_TWN	F	0:04:48.610-0:04:48.876	CS2b	1.52395	8	5.70912
Trial 1	1.1	S_TWN	F	0:04:48.876-0:04:49.142	CS2b	1.19209	8	4.46586
Trial 1	1.1	S_TWN	F	0:04:49.142-0:04:49.408	CS2b	0.803246	8	3.00915
Trial 1	1.1	S_TWN	F	0:04:49.408-0:04:49.674	CS2b	0.643697	8	2.41146
Trial 1	1.1	S_TWN	F	0:04:49.674-0:04:49.940	CS2b	0.327776	8	1.22792
Trial 1	1.1	S_TWN	F	0:04:49.940-0:04:50.206	CS2b	0.161237	8	0.604034
Trial 1	1.1	S_TWN	F	0:04:50.206-0:04:50.472	ITI2	0.114702	8	0.429704
Trial 1	1.1	S_TWN	F	0:04:50.472-0:04:50.738	ITI2	0.165533	8	0.620123
Trial 1	1.1	S_TWN	F	0:04:50.738-0:04:51.004	ITI2	0.171424	8	0.642195
Trial 1	1.1	S_TWN	F	0:04:51.004-0:04:51.270	ITI2	0.0569736	8	0.213437
Trial 1	1.1	S_TWN	F	0:04:51.270-0:04:51.536	ITI2	0.161795	8	0.606129
Trial 1	1.1	S_TWN	F	0:04:51.536-0:04:51.802	ITI2	0.0725081	8	0.271634
Trial 1	1.1	S_TWN	F	0:04:51.802-0:04:52.068	ITI2	0.234278	8	0.877663
Trial 1	1.1	S_TWN	F	0:04:52.068-0:04:52.334	ITI2	0.119176	8	0.446461
Trial 1	1.1	S_TWN	F	0:04:52.334-0:04:52.600	ITI2	0.0841611	8	0.315287
Trial 1	1.1	S_TWN	F	0:04:52.600-0:04:52.866	ITI2	0.0333464	8	0.124924
Trial 1	1.1	S_TWN	F	0:04:52.866-0:04:53.132	ITI2	0.0619435	8	0.232056
Trial 1	1.1	S_TWN	F	0:04:53.132-0:04:53.398	ITI2	0.0525841	8	0.196994
Trial 1	1.1	S_TWN	F	0:04:53.398-0:04:53.664	ITI2	0.0619237	8	0.231982
Trial 1	1.1	S_TWN	F	0:04:53.664-0:04:53.930	ITI2	0.114138	8	0.427588
Trial 1	1.1	S_TWN	F	0:04:53.930-0:04:54.196	ITI2	0.147329	8	0.551934
Trial 1	1.1	S_TWN	F	0:04:54.196-0:04:54.462	ITI2	0.178347	8	0.668134
Trial 1	1.1	S_TWN	F	0:04:54.462-0:04:54.728	ITI2	0.0495079	7	0.211965
Trial 1	1.1	S_TWN	F	0:04:54.728-0:04:54.994	ITI2	0.125718	8	0.470969
Trial 1	1.1	S_TWN	F	0:04:54.994-0:04:55.260	ITI2	0.0461402	8	0.172854
Trial 1	1.1	S_TWN	F	0:04:55.260-0:04:55.526	ITI2	0.0863721	8	0.32357
Trial 1	1.1	S_TWN	F	0:04:55.526-0:04:55.792	ITI2	0.131584	8	0.492946
Trial 1	1.1	S_TWN	F	0:04:55.792-0:04:56.058	ITI2	0.0472843	8	0.177138
Trial 1	1.1	S_TWN	F	0:04:56.058-0:04:56.324	ITI2	0.188659	8	0.706767
Trial 1	1.1	S_TWN	F	0:04:56.324-0:04:56.590	ITI2	0.0411579	8	0.154189
Trial 1	1.1	S_TWN	F	0:04:56.590-0:04:56.856	ITI2	0.0425357	8	0.15935
Trial 1	1.1	S_TWN	F	0:04:56.856-0:04:57.122	ITI2	0.0301036	8	0.112776
Trial 1	1.1	S_TWN	F	0:04:57.122-0:04:57.388	ITI2	0.129564	8	0.485379
Trial 1	1.1	S_TWN	F	0:04:57.388-0:04:57.654	ITI2	0.0908015	8	0.340164
Trial 1	1.1	S_TWN	F	0:04:57.654-0:04:57.920	ITI2	0.0769068	8	0.288111
Trial 1	1.1	S_TWN	F	0:04:57.920-0:04:58.186	ITI2	0.044998	8	0.168574
Trial 1	1.1	S_TWN	F	0:04:58.186-0:04:58.452	ITI2	0.0600967	8	0.225137
Trial 1	1.1	S_TWN	F	0:04:58.452-0:04:58.718	ITI2	0.134983	8	0.505678
Trial 1	1.1	S_TWN	F	0:04:58.718-0:04:58.984	ITI2	0.07205	8	0.269917
Trial 1	1.1	S_TWN	F	0:04:58.984-0:04:59.250	ITI2	0.169051	8	0.633313
Trial 1	1.1	S_TWN	F	0:04:59.250-0:04:59.516	ITI2	0.0296696	8	0.11115
Trial 1	1.1	S_TWN	F	0:04:59.516-0:04:59.782	ITI2	0.0926294	8	0.347015
Trial 1	1.1	S_TWN	F	0:04:59.782-0:05:00.048	ITI2	0.145848	8	0.546379
Trial 1	1.1	S_TWN	F	0:05:00.048-0:05:00.314	ITI2	0.0936141	8	0.350699
Trial 1	1.1	S_TWN	F	0:05:00.314-0:05:00.580	ITI2	0.0991963	8	0.371613
Trial 1	1.1	S_TWN	F	0:05:00.580-0:05:00.846	ITI2	0.0297096	8	0.111299
Trial 1	1.1	S_TWN	F	0:05:00.846-0:05:01.112	ITI2	0.0276877	8	0.103725
Trial 1	1.1	S_TWN	F	0:05:01.112-0:05:01.378	ITI2	0.0982688	8	0.368139
Trial 1	1.1	S_TWN	F	0:05:01.378-0:05:01.644	ITI2	0.108159	8	0.40519
Trial 1	1.1	S_TWN	F	0:05:01.644-0:05:01.910	ITI2	0.13282	8	0.497576
Trial 1	1.1	S_TWN	F	0:05:01.910-0:05:02.176	ITI2	0.112731	8	0.422317
Trial 1	1.1	S_TWN	F	0:05:02.176-0:05:02.442	ITI2	0.0820847	8	0.30751
Trial 1	1.1	S_TWN	F	0:05:02.442-0:05:02.708	ITI2	0.111992	8	0.419547
Trial 1	1.1	S_TWN	F	0:05:02.708-0:05:02.974	ITI2	0.0780837	8	0.292521
Trial 1	1.1	S_TWN	F	0:05:02.974-0:05:03.240	ITI2	0.0956982	8	0.35851
Trial 1	1.1	S_TWN	F	0:05:03.240-0:05:03.506	ITI2	0.0553874	8	0.207494
Trial 1	1.1	S_TWN	F	0:05:03.506-0:05:03.772	ITI2	0.0409825	8	0.153531
Trial 1	1.1	S_TWN	F	0:05:03.772-0:05:04.038	ITI2	0.102582	8	0.384297
Trial 1	1.1	S_TWN	F	0:05:04.038-0:05:04.304	ITI2	0.144864	7	0.620224
Trial 1	1.1	S_TWN	F	0:05:04.304-0:05:04.570	ITI2	0.134037	8	0.502135
Trial 1	1.1	S_TWN	F	0:05:04.570-0:05:04.836	ITI2	0.0973766	8	0.364795
Trial 1	1.1	S_TWN	F	0:05:04.836-0:05:05.102	ITI2	0.0282908	8	0.105984
Trial 1	1.1	S_TWN	F	0:05:05.102-0:05:05.368	ITI2	0.156921	8	0.587866
Trial 1	1.1	S_TWN	F	0:05:05.368-0:05:05.634	ITI2	0.0792278	8	0.296806
Trial 1	1.1	S_TWN	F	0:05:05.634-0:05:05.900	ITI2	0.0566937	8	0.212389
Trial 1	1.1	S_TWN	F	0:05:05.900-0:05:06.166	ITI2	0.0697106	8	0.261152
Trial 1	1.1	S_TWN	F	0:05:06.166-0:05:06.432	ITI2	0.083509	8	0.312844
Trial 1	1.1	S_TWN	F	0:05:06.432-0:05:06.698	ITI2	0.0498471	8	0.186739
Trial 1	1.1	S_TWN	F	0:05:06.698-0:05:06.964	ITI2	0.0586835	8	0.219842
Trial 1	1.1	S_TWN	F	0:05:06.964-0:05:07.230	ITI2	0.0296092	8	0.110924
Trial 1	1.1	S_TWN	F	0:05:07.230-0:05:07.496	ITI2	0.0316718	8	0.11865
Trial 1	1.1	S_TWN	F	0:05:07.496-0:05:07.762	ITI2	0.0581145	8	0.21771
Trial 1	1.1	S_TWN	F	0:05:07.762-0:05:08.028	ITI2	0.0471936	8	0.176798
Trial 1	1.1	S_TWN	F	0:05:08.028-0:05:08.294	ITI2	0.0573087	8	0.214693
Trial 1	1.1	S_TWN	F	0:05:08.294-0:05:08.560	ITI2	0.0263146	8	0.0985821
Trial 1	1.1	S_TWN	F	0:05:08.560-0:05:08.826	ITI2	0.0896289	8	0.335771
Trial 1	1.1	S_TWN	F	0:05:08.826-0:05:09.092	ITI2	0.0320243	8	0.119971
Trial 1	1.1	S_TWN	F	0:05:09.092-0:05:09.358	ITI2	0.0402354	8	0.150732
Trial 1	1.1	S_TWN	F	0:05:09.358-0:05:09.624	ITI2	0.0457361	8	0.171338
Trial 1	1.1	S_TWN	F	0:05:09.624-0:05:09.890	ITI2	0.0276894	8	0.103732
Trial 1	1.1	S_TWN	F	0:05:09.890-0:05:10.156	ITI2	0.0656347	8	0.245882
Trial 1	1.1	S_TWN	F	0:05:10.156-0:05:10.422	ITI2	0.0217922	8	0.081639
Trial 1	1.1	S_TWN	F	0:05:10.422-0:05:10.688	ITI2	0.0804348	8	0.30133
Trial 1	1.1	S_TWN	F	0:05:10.688-0:05:10.954	ITI2	0.0307167	8	0.115072
Trial 1	1.1	S_TWN	F	0:05:10.954-0:05:11.220	ITI2	0.0883841	8	0.331111
Trial 1	1.1	S_TWN	F	0:05:11.220-0:05:11.486	ITI2	0.0521259	8	0.195276
Trial 1	1.1	S_TWN	F	0:05:11.486-0:05:11.752	ITI2	0.0922241	8	0.345492
Trial 1	1.1	S_TWN	F	0:05:11.752-0:05:12.018	ITI2	0.0537801	8	0.201474
Trial 1	1.1	S_TWN	F	0:05:12.018-0:05:12.284	ITI2	0.0596215	8	0.223356
Trial 1	1.1	S_TWN	F	0:05:12.284-0:05:12.550	ITI2	0.160956	8	0.602979
Trial 1	1.1	S_TWN	F	0:05:12.550-0:05:12.816	ITI2	0.0455764	8	0.17074
Trial 1	1.1	S_TWN	F	0:05:12.816-0:05:13.082	ITI2	0.122522	8	0.458996
Trial 1	1.1	S_TWN	F	0:05:13.082-0:05:13.348	ITI2	0.0728589	8	0.27295
Trial 1	1.1	S_TWN	F	0:05:13.348-0:05:13.614	ITI2	0.105356	8	0.394687
Trial 1	1.1	S_TWN	F	0:05:13.614-0:05:13.880	ITI2	0.0995076	7	0.426033
Trial 1	1.1	S_TWN	F	0:05:13.880-0:05:14.146	ITI2	0.0552494	8	0.206979
Trial 1	1.1	S_TWN	F	0:05:14.146-0:05:14.412	ITI2	0.0608346	8	0.227901
Trial 1	1.1	S_TWN	F	0:05:14.412-0:05:14.678	ITI2	0.0801625	8	0.300308
Trial 1	1.1	S_TWN	F	0:05:14.678-0:05:14.944	ITI2	0.0987448	8	0.369922
Trial 1	1.1	S_TWN	F	0:05:14.944-0:05:15.210	ITI2	0.0419063	8	0.156991
Trial 1	1.1	S_TWN	F	0:05:15.210-0:05:15.476	ITI2	0.148047	8	0.554621
Trial 1	1.1	S_TWN	F	0:05:15.476-0:05:15.742	ITI2	0.0610417	8	0.228676
Trial 1	1.1	S_TWN	F	0:05:15.742-0:05:16.008	ITI2	0.119555	8	0.447881
Trial 1	1.1	S_TWN	F	0:05:16.008-0:05:16.274	ITI2	0.0624774	8	0.234057
Trial 1	1.1	S_TWN	F	0:05:16.274-0:05:16.540	ITI2	0.0722992	8	0.270849
Trial 1	1.1	S_TWN	F	0:05:16.540-0:05:16.806	ITI2	0.0660469	8	0.247428
Trial 1	1.1	S_TWN	F	0:05:16.806-0:05:17.072	ITI2	0.0316746	8	0.118661
Trial 1	1.1	S_TWN	F	0:05:17.072-0:05:17.338	ITI2	0.0908558	8	0.340371
Trial 1	1.1	S_TWN	F	0:05:17.338-0:05:17.604	ITI2	0.0396436	8	0.148515
Trial 1	1.1	S_TWN	F	0:05:17.604-0:05:17.870	ITI2	0.0974468	8	0.365058
Trial 1	1.1	S_TWN	F	0:05:17.870-0:05:18.136	ITI2	0.0317356	8	0.11889
Trial 1	1.1	S_TWN	F	0:05:18.136-0:05:18.402	ITI2	0.105718	8	0.396045
Trial 1	1.1	S_TWN	F	0:05:18.402-0:05:18.668	ITI2	0.107413	8	0.402395
Trial 1	1.1	S_TWN	F	0:05:18.668-0:05:18.934	ITI2	0.0811864	8	0.304145
Trial 1	1.1	S_TWN	F	0:05:18.934-0:05:19.200	ITI2	0.0912217	8	0.341738
Trial 1	1.1	S_TWN	F	0:05:19.200-0:05:19.466	ITI2	0.0580646	8	0.217524
Trial 1	1.1	S_TWN	F	0:05:19.466-0:05:19.732	ITI2	0.0986282	8	0.369484
Trial 1	1.1	S_TWN	F	0:05:19.732-0:05:19.998	ITI2	0.0338227	8	0.126708
Trial 1	1.1	S_TWN	F	0:05:19.998-0:05:20.264	ITI2	0.103661	8	0.38834
Trial 1	1.1	S_TWN	F	0:05:20.264-0:05:20.530	ITI2	0.0988219	8	0.370212
Trial 1	1.1	S_TWN	F	0:05:20.530-0:05:20.796	ITI2	0.138615	8	0.519286
Trial 1	1.1	S_TWN	F	0:05:20.796-0:05:21.062	ITI2	0.0838025	8	0.313944
Trial 1	1.1	S_TWN	F	0:05:21.062-0:05:21.328	ITI2	0.0715173	8	0.26792
Trial 1	1.1	S_TWN	F	0:05:21.328-0:05:21.594	ITI2	0.0982173	8	0.367949
Trial 1	1.1	S_TWN	F	0:05:21.594-0:05:21.860	ITI2	0.0695844	8	0.260681
Trial 1	1.1	S_TWN	F	0:05:21.860-0:05:22.126	ITI2	0.0851897	8	0.319141
Trial 1	1.1	S_TWN	F	0:05:22.126-0:05:22.392	ITI2	0.0827461	8	0.309987
Trial 1	1.1	S_TWN	F	0:05:22.392-0:05:22.658	ITI2	0.111411	8	0.417373
Trial 1	1.1	S_TWN	F	0:05:22.658-0:05:22.924	ITI2	0.0971733	8	0.364037
Trial 1	1.1	S_TWN	F	0:05:22.924-0:05:23.190	ITI2	0.0647951	8	0.242738
Trial 1	1.1	S_TWN	F	0:05:23.190-0:05:23.456	ITI2	0.0278418	7	0.119203
Trial 1	1.1	S_TWN	F	0:05:23.456-0:05:23.722	ITI2	0.0482698	8	0.180831
Trial 1	1.1	S_TWN	F	0:05:23.722-0:05:23.988	ITI2	0.127141	8	0.476303
Trial 1	1.1	S_TWN	F	0:05:23.988-0:05:24.254	ITI2	0.0267058	8	0.100047
Trial 1	1.1	S_TWN	F	0:05:24.254-0:05:24.520	ITI2	0.129907	8	0.486661
Trial 1	1.1	S_TWN	F	0:05:24.520-0:05:24.786	ITI2	0.0310374	8	0.116274
Trial 1	1.1	S_TWN	F	0:05:24.786-0:05:25.052	ITI2	0.141512	8	0.530139
Trial 1	1.1	S_TWN	F	0:05:25.052-0:05:25.318	ITI2	0.0185093	8	0.0693405
Trial 1	1.1	S_TWN	F	0:05:25.318-0:05:25.584	ITI2	0.0550337	8	0.20617
Trial 1	1.1	S_TWN	F	0:05:25.584-0:05:25.850	ITI2	0.0442884	8	0.165915
Trial 1	1.1	S_TWN	F	0:05:25.850-0:05:26.116	ITI2	0.0471817	8	0.176753
Trial 1	1.1	S_TWN	F	0:05:26.116-0:05:26.382	ITI2	0.100646	8	0.377047
Trial 1	1.1	S_TWN	F	0:05:26.382-0:05:26.648	ITI2	0.018885	8	0.0707475
Trial 1	1.1	S_TWN	F	0:05:26.648-0:05:26.914	ITI2	0.0613441	8	0.22981
Trial 1	1.1	S_TWN	F	0:05:26.914-0:05:27.180	ITI2	0.0398813	8	0.149406
Trial 1	1.1	S_TWN	F	0:05:27.180-0:05:27.446	ITI2	0.0714005	8	0.267483
Trial 1	1.1	S_TWN	F	0:05:27.446-0:05:27.712	ITI2	0.097564	8	0.365502
Trial 1	1.1	S_TWN	F	0:05:27.712-0:05:27.978	ITI2	0.0893921	8	0.334883
Trial 1	1.1	S_TWN	F	0:05:27.978-0:05:28.244	ITI2	0.128706	8	0.482164
Trial 1	1.1	S_TWN	F	0:05:28.244-0:05:28.510	ITI2	0.0389919	8	0.146073
Trial 1	1.1	S_TWN	F	0:05:28.510-0:05:28.776	ITI2	0.089859	8	0.336633
Trial 1	1.1	S_TWN	F	0:05:28.776-0:05:29.042	ITI2	0.0240437	8	0.090074
Trial 1	1.1	S_TWN	F	0:05:29.042-0:05:29.308	ITI2	0.12538	8	0.469707
Trial 1	1.1	S_TWN	F	0:05:29.308-0:05:29.574	ITI2	0.0607069	8	0.227423
Trial 1	1.1	S_TWN	F	0:05:29.574-0:05:29.840	ITI2	0.0546426	8	0.204704
Trial 1	1.1	S_TWN	F	0:05:29.840-0:05:30.106	ITI2	0.042052	8	0.157537
Trial 1	1.1	S_TWN	F	0:05:30.106-0:05:30.372	ITI2	0.0575952	8	0.215766
Trial 1	1.1	S_TWN	F	0:05:30.372-0:05:30.638	ITI2	0.0493083	8	0.18472
Trial 1	1.1	S_TWN	F	0:05:30.638-0:05:30.904	ITI2	0.0277115	8	0.103815
Trial 1	1.1	S_TWN	F	0:05:30.904-0:05:31.170	ITI2	0.10002	8	0.374697
Trial 1	1.1	S_TWN	F	0:05:31.170-0:05:31.436	ITI2	0.029971	8	0.112279
Trial 1	1.1	S_TWN	F	0:05:31.436-0:05:31.702	ITI2	0.0618438	8	0.231682
Trial 1	1.1	S_TWN	F	0:05:31.702-0:05:31.968	ITI2	0.0459275	8	0.172056
Trial 1	1.1	S_TWN	F	0:05:31.968-0:05:32.234	ITI2	0.0963266	8	0.360866
Trial 1	1.1	S_TWN	F	0:05:32.234-0:05:32.500	ITI2	0.0429354	8	0.160846
Trial 1	1.1	S_TWN	F	0:05:32.500-0:05:32.766	ITI2	0.031704	7	0.135738
Trial 1	1.1	S_TWN	F	0:05:32.766-0:05:33.032	ITI2	0.0371242	8	0.139077
Trial 1	1.1	S_TWN	F	0:05:33.032-0:05:33.298	ITI2	0.0492271	8	0.184417
Trial 1	1.1	S_TWN	F	0:05:33.298-0:05:33.564	ITI2	0.0719125	8	0.269401
Trial 1	1.1	S_TWN	F	0:05:33.564-0:05:33.830	ITI2	0.0371749	8	0.139267
Trial 1	1.1	S_TWN	F	0:05:33.830-0:05:34.096	ITI2	0.0660557	8	0.247461
Trial 1	1.1	S_TWN	F	0:05:34.096-0:05:34.362	ITI2	0.0342947	8	0.128476
Trial 1	1.1	S_TWN	F	0:05:34.362-0:05:34.628	ITI2	0.0560915	8	0.210132
Trial 1	1.1	S_TWN	F	0:05:34.628-0:05:34.894	ITI2	0.0386575	8	0.144821
Trial 1	1.1	S_TWN	F	0:05:34.894-0:05:35.160	ITI2	0.0387915	8	0.145324
Trial 1	1.1	S_TWN	F	0:05:35.160-0:05:35.426	ITI2	0.0393801	8	0.147527
Trial 1	1.1	S_TWN	F	0:05:35.426-0:05:35.692	ITI2	0.0177587	8	0.0665283
Trial 1	1.1	S_TWN	F	0:05:35.692-0:05:35.958	ITI2	0.0572318	8	0.214405
Trial 1	1.1	S_TWN	F	0:05:35.958-0:05:36.224	ITI2	0.105213	8	0.394154
Trial 1	1.1	S_TWN	F	0:05:36.224-0:05:36.490	ITI2	0.139394	8	0.522203
Trial 1	1.1	S_TWN	F	0:05:36.490-0:05:36.756	ITI2	0.162042	8	0.607053
Trial 1	1.1	S_TWN	F	0:05:36.756-0:05:37.022	ITI2	0.0929974	8	0.34839
Trial 1	1.1	S_TWN	F	0:05:37.022-0:05:37.288	ITI2	0.0473015	8	0.177204
Trial 1	1.1	S_TWN	F	0:05:37.288-0:05:37.554	ITI2	0.0589676	8	0.220907
Trial 1	1.1	S_TWN	F	0:05:37.554-0:05:37.820	ITI2	0.0891201	8	0.333865
Trial 1	1.1	S_TWN	F	0:05:37.820-0:05:38.086	ITI2	0.0192208	8	0.0720058
Trial 1	1.1	S_TWN	F	0:05:38.086-0:05:38.352	ITI2	0.0679653	8	0.254616
Trial 1	1.1	S_TWN	F	0:05:38.352-0:05:38.618	ITI2	0.105852	8	0.396549
Trial 1	1.1	S_TWN	F	0:05:38.618-0:05:38.884	ITI2	0.0913795	8	0.34233
Trial 1	1.1	S_TWN	F	0:05:38.884-0:05:39.150	ITI2	0.0819758	8	0.3071
Trial 1	1.1	S_TWN	F	0:05:39.150-0:05:39.416	ITI2	0.0865777	8	0.32434
Trial 1	1.1	S_TWN	F	0:05:39.416-0:05:39.682	ITI2	0.0470227	8	0.176159
Trial 1	1.1	S_TWN	F	0:05:39.682-0:05:39.948	ITI2	0.0464807	8	0.174129
Trial 1	1.1	S_TWN	F	0:05:39.948-0:05:40.214	ITI2	0.0831788	8	0.311607
Trial 1	1.1	S_TWN	F	0:05:40.214-0:05:40.480	ITI2	0.483241	8	1.81035
Trial 1	1.1	S_TWN	F	0:05:40.480-0:05:40.746	ITI2	0.537234	8	2.0126
Trial 1	1.1	S_TWN	F	0:05:40.746-0:05:41.012	ITI2	0.284619	8	1.06626
Trial 1	1.1	S_TWN	F	0:05:41.012-0:05:41.278	ITI2	0.23467	8	0.879135
Trial 1	1.1	S_TWN	F	0:05:41.278-0:05:41.544	ITI2	0.357147	8	1.33796
Trial 1	1.1	S_TWN	F	0:05:41.544-0:05:41.810	ITI2	0.475978	8	1.78315
Trial 1	1.1	S_TWN	F	0:05:41.810-0:05:42.076	ITI2	0.736053	8	2.75742
Trial 1	1.1	S_TWN	F	0:05:42.076-0:05:42.342	ITI2	0.429544	7	1.83906
Trial 1	1.1	S_TWN	F	0:05:42.342-0:05:42.608	ITI2	0.340427	8	1.27534
Trial 1	1.1	S_TWN	F	0:05:42.608-0:05:42.874	ITI2	0.00638003	8	0.0239011
Trial 1	1.1	S_TWN	F	0:05:42.874-0:05:43.140	ITI2	0.00638003	8	0.0239011
Trial 1	1.1	S_TWN	F	0:05:43.140-0:05:43.406	ITI2	0.00638003	8	0.0239012
Trial 1	1.1	S_TWN	F	0:05:43.406-0:05:43.672	ITI2	0.00638003	8	0.0239011
Trial 1	1.1	S_TWN	F	0:05:43.672-0:05:43.938	ITI2	0.00638003	8	0.0239012
Trial 1	1.1	S_TWN	F	0:05:43.938-0:05:44.204	ITI2	0.00638003	8	0.0239011
Trial 1	1.1	S_TWN	F	0:05:44.204-0:05:44.470	ITI2	0.00638003	8	0.0239011
Trial 1	1.1	S_TWN	F	0:05:44.470-0:05:44.736	ITI2	0.00638003	8	0.0239012
Trial 1	1.1	S_TWN	F	0:05:44.736-0:05:45.002	ITI2	0.00638003	8	0.0239011
Trial 1	1.1	S_TWN	F	0:05:45.002-0:05:45.268	ITI2	0.00638003	8	0.0239012
Trial 1	1.1	S_TWN	F	0:05:45.268-0:05:45.534	ITI2	0.00638003	8	0.0239011
Trial 1	1.1	S_TWN	F	0:05:45.534-0:05:45.800	ITI2	0.00638003	8	0.0239011
Trial 1	1.1	S_TWN	F	0:05:45.800-0:05:46.066	ITI2	0.00638003	8	0.0239012
Trial 1	1.1	S_TWN	F	0:05:46.066-0:05:46.332	ITI2	0.00638003	8	0.0239011
Trial 1	1.1	S_TWN	F	0:05:46.332-0:05:46.598	ITI2	0.00638003	8	0.0239012
Trial 1	1.1	S_TWN	F	0:05:46.598-0:05:46.864	ITI2	0.00638003	8	0.0239011
Trial 1	1.1	S_TWN	F	0:05:46.864-0:05:47.130	ITI2	0.00638003	8	0.0239011
Trial 1	1.1	S_TWN	F	0:05:47.130-0:05:47.396	ITI2	0.00638003	8	0.0239012
Trial 1	1.1	S_TWN	F	0:05:47.396-0:05:47.662	ITI2	0.00638003	8	0.0239011
Trial 1	1.1	S_TWN	F	0:05:47.662-0:05:47.928	ITI2	0.00638003	8	0.0239012
Trial 1	1.1	S_TWN	F	0:05:47.928-0:05:48.194	ITI2	0.00638003	8	0.0239011
Trial 1	1.1	S_TWN	F	0:05:48.194-0:05:48.460	ITI2	0.00638003	8	0.0239011
Trial 1	1.1	S_TWN	F	0:05:48.460-0:05:48.726	ITI2	0.00638003	8	0.0239012
Trial 1	1.1	S_TWN	F	0:05:48.726-0:05:48.992	ITI2	0.00638003	8	0.0239011
Trial 1	1.1	S_TWN	F	0:05:48.992-0:05:49.258	ITI2	0.00638003	8	0.0239012
Trial 1	1.1	S_TWN	F	0:05:49.258-0:05:49.524	ITI2	0.00638003	8	0.0239011
Trial 1	1.1	S_TWN	F	0:05:49.524-0:05:49.790	ITI2	0.00638003	8	0.0239011
Trial 1	1.1	S_TWN	F	0:05:49.790-0:05:50.056	ITI2	0.00638003	8	0.0239012
Trial 1	1.1	S_TWN	F	0:05:50.056-0:05:50.322	ITI2	0.00638003	8	0.0239011
Trial 1	1.1	S_TWN	F	0:05:50.322-0:05:50.588	ITI2	0.00638003	8	0.0239012
Trial 1	1.1	S_TWN	F	0:05:50.588-0:05:50.854	ITI2	0.00638003	8	0.0239011
Trial 1	1.1	S_TWN	F	0:05:50.854-0:05:51.120	ITI2	0.00638003	8	0.0239011
Trial 1	1.1	S_TWN	F	0:05:51.120-0:05:51.386	ITI2	0.00638003	8	0.0239012
Trial 1	1.1	S_TWN	F	0:05:51.386-0:05:51.652	ITI2	0.00638003	8	0.0239011
Trial 1	1.1	S_TWN	F	0:05:51.652-0:05:51.918	ITI2	0.00558253	7	0.0239012
Trial 1	1.1	S_TWN	F	0:05:51.918-0:05:52.184	ITI2	0.00638003	8	0.0239012
Trial 1	1.1	S_TWN	F	0:05:52.184-0:05:52.450	ITI2	0.00638003	8	0.0239011
Trial 1	1.1	S_TWN	F	0:05:52.450-0:05:52.716	ITI2	0.00638003	8	0.0239011
Trial 1	1.1	S_TWN	F	0:05:52.716-0:05:52.982	ITI2	0.00638003	8	0.0239012
Trial 1	1.1	S_TWN	F	0:05:52.982-0:05:53.248	ITI2	0.00638003	8	0.0239011
Trial 1	1.1	S_TWN	F	0:05:53.248-0:05:53.514	ITI2	0.00638003	8	0.0239012
Trial 1	1.1	S_TWN	F	0:05:53.514-0:05:53.780	ITI2	0.00638003	8	0.0239011
Trial 1	1.1	S_TWN	F	0:05:53.780-0:05:54.046	ITI2	0.00638003	8	0.0239011
Trial 1	1.1	S_TWN	F	0:05:54.046-0:05:54.312	ITI2	0.00638003	8	0.0239012
Trial 1	1.1	S_TWN	F	0:05:54.312-0:05:54.578	ITI2	0.00638003	8	0.0239011
Trial 1	1.1	S_TWN	F	0:05:54.578-0:05:54.844	ITI2	0.00638003	8	0.0239012
Trial 1	1.1	S_TWN	F	0:05:54.844-0:05:55.110	ITI2	0.00638003	8	0.0239011
Trial 1	1.1	S_TWN	F	0:05:55.110-0:05:55.376	ITI2	0.00638003	8	0.0239011
Trial 1	1.1	S_TWN	F	0:05:55.376-0:05:55.642	ITI2	0.00638003	8	0.0239012
Trial 1	1.1	S_TWN	F	0:05:55.642-0:05:55.908	ITI2	0.00638003	8	0.0239011
Trial 1	1.1	S_TWN	F	0:05:55.908-0:05:56.174	ITI2	0.00638003	8	0.0239012
Trial 1	1.1	S_TWN	F	0:05:56.174-0:05:56.440	ITI2	0.00638003	8	0.0239011
Trial 1	1.1	S_TWN	F	0:05:56.440-0:05:56.706	ITI2	0.00638003	8	0.0239011
Trial 1	1.1	S_TWN	F	0:05:56.706-0:05:56.972	ITI2	0.00638003	8	0.0239012
Trial 1	1.1	S_TWN	F	0:05:56.972-0:05:57.238	ITI2	0.00638003	8	0.0239011
Trial 1	1.1	S_TWN	F	0:05:57.238-0:05:57.504	ITI2	0.00638003	8	0.0239012
Trial 1	1.1	S_TWN	F	0:05:57.504-0:05:57.770	ITI2	0.00638003	8	0.0239011
Trial 1	1.1	S_TWN	F	0:05:57.770-0:05:58.036	ITI2	0.00638003	8	0.0239011
Trial 1	1.1	S_TWN	F	0:05:58.036-0:05:58.302	ITI2	0.00638003	8	0.0239012
Trial 1	1.1	S_TWN	F	0:05:58.302-0:05:58.568	ITI2	0.00638003	8	0.0239011
Trial 1	1.1	S_TWN	F	0:05:58.568-0:05:58.834	ITI2	0.00638003	8	0.0239012
Trial 1	1.1	S_TWN	F	0:05:58.834-0:05:59.100	ITI2	0.00638003	8	0.0239011
Trial 1	1.1	S_TWN	F	0:05:59.100-0:05:59.366	ITI2	0.00638003	8	0.0239011
Trial 1	1.1	S_TWN	F	0:05:59.366-0:05:59.632	ITI2	0.00638003	8	0.0239012
Trial 1	1.1	S_TWN	F	0:05:59.632-0:05:59.898	ITI2	0.00638003	8	0.0239011
Trial 1	1.1	S_TWN	F	0:05:59.898-0:06:00.164	ITI2	0.00638003	8	0.0239012
Trial 1	1.1	S_TWN	F	0:06:00.164-0:06:00.430	ITI2	0.00638003	8	0.0239011
Trial 1	1.1	S_TWN	F	0:06:00.430-0:06:00.696	ITI2	0.00638003	8	0.0239011
Trial 1	1.1	S_TWN	F	0:06:00.696-0:06:00.962	ITI2	0.00638003	8	0.0239012
Trial 1	1.1	S_TWN	F	0:06:00.962-0:06:01.228	ITI2	0.00638003	8	0.0239011
Trial 1	1.1	S_TWN	F	0:06:01.228-0:06:01.494	ITI2	0.00558253	7	0.0239012
Trial 1	1.1	S_TWN	F	0:06:01.494-0:06:01.760	ITI2	0.00638003	8	0.0239012
Trial 1	1.1	S_TWN	F	0:06:01.760-0:06:02.026	ITI2	0.00638003	8	0.0239011
Trial 1	1.1	S_TWN	F	0:06:02.026-0:06:02.292	ITI2	0.00638003	8	0.0239012
Trial 1	1.1	S_TWN	F	0:06:02.292-0:06:02.558	ITI2	0.00638003	8	0.0239011
Trial 1	1.1	S_TWN	F	0:06:02.558-0:06:02.824	ITI2	0.00638003	8	0.0239011
Trial 1	1.1	S_TWN	F	0:06:02.824-0:06:03.090	ITI2	0.00638003	8	0.0239012
Trial 1	1.1	S_TWN	F	0:06:03.090-0:06:03.356	ITI2	0.00638003	8	0.0239011
Trial 1	1.1	S_TWN	F	0:06:03.356-0:06:03.622	ITI2	0.00638003	8	0.0239012
Trial 1	1.1	S_TWN	F	0:06:03.622-0:06:03.888	ITI2	0.00638003	8	0.0239011
Trial 1	1.1	S_TWN	F	0:06:03.888-0:06:04.154	ITI2	0.00638003	8	0.0239011
Trial 1	1.1	S_TWN	F	0:06:04.154-0:06:04.420	ITI2	0.00638003	8	0.0239012
Trial 1	1.1	S_TWN	F	0:06:04.420-0:06:04.686	ITI2	0.00638003	8	0.0239011
Trial 1	1.1	S_TWN	F	0:06:04.686-0:06:04.952	ITI2	0.00638003	8	0.0239012
Trial 1	1.1	S_TWN	F	0:06:04.952-0:06:05.218	ITI2	0.00638003	8	0.0239011
Trial 1	1.1	S_TWN	F	0:06:05.218-0:06:05.484	ITI2	0.00638003	8	0.0239011
Trial 1	1.1	S_TWN	F	0:06:05.484-0:06:05.750	ITI2	0.00638003	8	0.0239012
Trial 1	1.1	S_TWN	F	0:06:05.750-0:06:06.016	ITI2	0.00638003	8	0.0239011
Trial 1	1.1	S_TWN	F	0:06:06.016-0:06:06.282	ITI2	0.00638003	8	0.0239012
Trial 1	1.1	S_TWN	F	0:06:06.282-0:06:06.548	ITI2	0.00638003	8	0.0239011
Trial 1	1.1	S_TWN	F	0:06:06.548-0:06:06.814	ITI2	0.00638003	8	0.0239011
Trial 1	1.1	S_TWN	F	0:06:06.814-0:06:07.080	ITI2	0.00638003	8	0.0239012
Trial 1	1.1	S_TWN	F	0:06:07.080-0:06:07.346	ITI2	0.00638003	8	0.0239011
Trial 1	1.1	S_TWN	F	0:06:07.346-0:06:07.612	ITI2	0.00638003	8	0.0239012
Trial 1	1.1	S_TWN	F	0:06:07.612-0:06:07.878	ITI2	0.00638003	8	0.0239011
Trial 1	1.1	S_TWN	F	0:06:07.878-0:06:08.144	ITI2	0.00638003	8	0.0239011
Trial 1	1.1	S_TWN	F	0:06:08.144-0:06:08.410	ITI2	0.00638003	8	0.0239012
Trial 1	1.1	S_TWN	F	0:06:08.410-0:06:08.676	ITI2	0.00638003	8	0.0239011
Trial 1	1.1	S_TWN	F	0:06:08.676-0:06:08.942	ITI2	0.00638003	8	0.0239012
Trial 1	1.1	S_TWN	F	0:06:08.942-0:06:09.208	ITI2	0.00638003	8	0.0239011
Trial 1	1.1	S_TWN	F	0:06:09.208-0:06:09.474	ITI2	0.00638003	8	0.0239011
Trial 1	1.1	S_TWN	F	0:06:09.474-0:06:09.740	ITI2	0.00638003	8	0.0239012
Trial 1	1.1	S_TWN	F	0:06:09.740-0:06:10.006	ITI2	0.00638003	8	0.0239011
Trial 1	1.1	S_TWN	F	0:06:10.006-0:06:10.272	ITI2	0.00638003	8	0.0239012
Trial 1	1.1	S_TWN	F	0:06:10.272-0:06:10.538	ITI2	0.00638003	8	0.0239011
Trial 1	1.1	S_TWN	F	0:06:10.538-0:06:10.804	ITI2	0.00558253	7	0.0239012
Trial 1	1.1	S_TWN	F	0:06:10.804-0:06:11.070	ITI2	0.00638003	8	0.0239011
Trial 1	1.1	S_TWN	F	0:06:11.070-0:06:11.336	ITI2	0.00638003	8	0.0239012
Trial 1	1.1	S_TWN	F	0:06:11.336-0:06:11.602	ITI2	0.00638003	8	0.0239011
Trial 1	1.1	S_TWN	F	0:06:11.602-0:06:11.868	ITI2	0.00638003	8	0.0239012
Trial 1	1.1	S_TWN	F	0:06:11.868-0:06:12.134	ITI2	0.00638003	8	0.0239011
Trial 1	1.1	S_TWN	F	0:06:12.134-0:06:12.400	ITI2	0.00638003	8	0.0239011
Trial 1	1.1	S_TWN	F	0:06:12.400-0:06:12.666	ITI2	0.00638003	8	0.0239012
Trial 1	1.1	S_TWN	F	0:06:12.666-0:06:12.932	ITI2	0.00638003	8	0.0239011
Trial 1	1.1	S_TWN	F	0:06:12.932-0:06:13.198	ITI2	0.00638003	8	0.0239012
Trial 1	1.1	S_TWN	F	0:06:13.198-0:06:13.464	ITI2	0.00638003	8	0.0239011
Trial 1	1.1	S_TWN	F	0:06:13.464-0:06:13.730	ITI2	0.00638003	8	0.0239011
Trial 1	1.1	S_TWN	F	0:06:13.730-0:06:13.996	ITI2	0.00638003	8	0.0239012
Trial 1	1.1	S_TWN	F	0:06:13.996-0:06:14.262	ITI2	0.00638003	8	0.0239011
Trial 1	1.1	S_TWN	F	0:06:14.262-0:06:14.528	ITI2	0.00638003	8	0.0239012
Trial 1	1.1	S_TWN	F	0:06:14.528-0:06:14.794	ITI2	0.00638003	8	0.0239011
Trial 1	1.1	S_TWN	F	0:06:14.794-0:06:15.060	ITI2	0.00638003	8	0.0239011
Trial 1	1.1	S_TWN	F	0:06:15.060-0:06:15.326	ITI2	0.00638003	8	0.0239012
Trial 1	1.1	S_TWN	F	0:06:15.326-0:06:15.592	ITI2	0.00638003	8	0.0239011
Trial 1	1.1	S_TWN	F	0:06:15.592-0:06:15.858	ITI2	0.00638003	8	0.0239012
Trial 1	1.1	S_TWN	F	0:06:15.858-0:06:16.124	ITI2	0.00638003	8	0.0239011
Trial 1	1.1	S_TWN	F	0:06:16.124-0:06:16.390	ITI2	0.00638003	8	0.0239011
Trial 1	1.1	S_TWN	F	0:06:16.390-0:06:16.656	ITI2	0.00638003	8	0.0239012
Trial 1	1.1	S_TWN	F	0:06:16.656-0:06:16.922	ITI2	0.00638003	8	0.0239011
Trial 1	1.1	S_TWN	F	0:06:16.922-0:06:17.188	ITI2	0.00638003	8	0.0239012
Trial 1	1.1	S_TWN	F	0:06:17.188-0:06:17.454	ITI2	0.00638003	8	0.0239011
Trial 1	1.1	S_TWN	F	0:06:17.454-0:06:17.720	ITI2	0.00638003	8	0.0239011
Trial 1	1.1	S_TWN	F	0:06:17.720-0:06:17.986	ITI2	0.00638003	8	0.0239012
Trial 1	1.1	S_TWN	F	0:06:17.986-0:06:18.252	ITI2	0.00638003	8	0.0239011
Trial 1	1.1	S_TWN	F	0:06:18.252-0:06:18.518	ITI2	0.00638003	8	0.0239012
Trial 1	1.1	S_TWN	F	0:06:18.518-0:06:18.784	ITI2	0.00638003	8	0.0239011
Trial 1	1.1	S_TWN	F	0:06:18.784-0:06:19.050	ITI2	0.00638003	8	0.0239011
Trial 1	1.1	S_TWN	F	0:06:19.050-0:06:19.316	ITI2	0.00638003	8	0.0239012
Trial 1	1.1	S_TWN	F	0:06:19.316-0:06:19.582	ITI2	0.00638003	8	0.0239011
Trial 1	1.1	S_TWN	F	0:06:19.582-0:06:19.848	ITI2	0.00638003	8	0.0239012
Trial 1	1.1	S_TWN	F	0:06:19.848-0:06:20.114	ITI2	0.00638003	8	0.0239011
Trial 1	1.1	S_TWN	F	0:06:20.114-0:06:20.380	ITI2	0.00558253	7	0.0239012
Trial 1	1.1	S_TWN	F	0:06:20.380-0:06:20.646	ITI2	0.00638003	8	0.0239012
Trial 1	1.1	S_TWN	F	0:06:20.646-0:06:20.912	ITI2	0.00638003	8	0.0239011
Trial 1	1.1	S_TWN	F	0:06:20.912-0:06:21.178	ITI2	0.00638003	8	0.0239011
Trial 1	1.1	S_TWN	F	0:06:21.178-0:06:21.444	ITI2	0.00638003	8	0.0239012
Trial 1	1.1	S_TWN	F	0:06:21.444-0:06:21.710	ITI2	0.00638003	8	0.0239011
Trial 1	1.1	S_TWN	F	0:06:21.710-0:06:21.976	ITI2	0.00638003	8	0.0239012
Trial 1	1.1	S_TWN	F	0:06:21.976-0:06:22.242	ITI2	0.00638003	8	0.0239011
Trial 1	1.1	S_TWN	F	0:06:22.242-0:06:22.508	ITI2	0.00638003	8	0.0239011
Trial 1	1.1	S_TWN	F	0:06:22.508-0:06:22.774	ITI2	0.00638003	8	0.0239012
Trial 1	1.1	S_TWN	F	0:06:22.774-0:06:23.040	ITI2	0.00638003	8	0.0239011
Trial 1	1.1	S_TWN	F	0:06:23.040-0:06:23.306	ITI2	0.00638003	8	0.0239012
Trial 1	1.1	S_TWN	F	0:06:23.306-0:06:23.572	ITI2	0.00638003	8	0.0239011
Trial 1	1.1	S_TWN	F	0:06:23.572-0:06:23.838	ITI2	0.00638003	8	0.0239011
Trial 1	1.1	S_TWN	F	0:06:23.838-0:06:24.104	ITI2	0.00638003	8	0.0239012
Trial 1	1.1	S_TWN	F	0:06:24.104-0:06:24.370	ITI2	0.00638003	8	0.0239011
Trial 1	1.1	S_TWN	F	0:06:24.370-0:06:24.636	ITI2	0.00638003	8	0.0239012
Trial 1	1.1	S_TWN	F	0:06:24.636-0:06:24.902	ITI2	0.00638003	8	0.0239011
Trial 1	1.1	S_TWN	F	0:06:24.902-0:06:25.168	ITI2	0.00638003	8	0.0239011
Trial 1	1.1	S_TWN	F	0:06:25.168-0:06:25.434	ITI2	0.00638003	8	0.0239012
Trial 1	1.1	S_TWN	F	0:06:25.434-0:06:25.700	ITI2	0.00638003	8	0.0239011
Trial 1	1.1	S_TWN	F	0:06:25.700-0:06:25.966	ITI2	0.00638003	8	0.0239012
Trial 1	1.1	S_TWN	F	0:06:25.966-0:06:26.232	ITI2	0.00638003	8	0.0239011
Trial 1	1.1	S_TWN	F	0:06:26.232-0:06:26.498	ITI2	0.00638003	8	0.0239011
Trial 1	1.1	S_TWN	F	0:06:26.498-0:06:26.764	ITI2	0.00638003	8	0.0239012
Trial 1	1.1	S_TWN	F	0:06:26.764-0:06:27.030	ITI2	0.00638003	8	0.0239011
Trial 1	1.1	S_TWN	F	0:06:27.030-0:06:27.296	ITI2	0.00638003	8	0.0239012
Trial 1	1.1	S_TWN	F	0:06:27.296-0:06:27.562	ITI2	0.00638003	8	0.0239011
Trial 1	1.1	S_TWN	F	0:06:27.562-0:06:27.828	ITI2	0.00638003	8	0.0239011
Trial 1	1.1	S_TWN	F	0:06:27.828-0:06:28.094	ITI2	0.00638003	8	0.0239012
Trial 1	1.1	S_TWN	F	0:06:28.094-0:06:28.360	ITI2	0.00638003	8	0.0239011
Trial 1	1.1	S_TWN	F	0:06:28.360-0:06:28.626	ITI2	0.00638003	8	0.0239012
Trial 1	1.1	S_TWN	F	0:06:28.626-0:06:28.892	ITI2	0.00638003	8	0.0239011
Trial 1	1.1	S_TWN	F	0:06:28.892-0:06:29.158	ITI2	0.00638003	8	0.0239011
Trial 1	1.1	S_TWN	F	0:06:29.158-0:06:29.424	ITI2	0.00638003	8	0.0239012
Trial 1	1.1	S_TWN	F	0:06:29.424-0:06:29.690	ITI2	0.00638003	8	0.0239011
Trial 1	1.1	S_TWN	F	0:06:29.690-0:06:29.956	ITI2	0.00558253	7	0.0239012
Trial 1	1.1	S_TWN	F	0:06:29.956-0:06:30.222	ITI2	0.00638003	8	0.0239012
Trial 1	1.1	S_TWN	F	0:06:30.222-0:06:30.488	CS3a	0.00638003	8	0.0239011
Trial 1	1.1	S_TWN	F	0:06:30.488-0:06:30.754	CS3a	0.00638003	8	0.0239011
Trial 1	1.1	S_TWN	F	0:06:30.754-0:06:31.020	CS3a	0.00638003	8	0.0239012
Trial 1	1.1	S_TWN	F	0:06:31.020-0:06:31.286	CS3a	0.00638003	8	0.0239011
Trial 1	1.1	S_TWN	F	0:06:31.286-0:06:31.552	CS3a	0.00638003	8	0.0239012
Trial 1	1.1	S_TWN	F	0:06:31.552-0:06:31.818	CS3a	0.00638003	8	0.0239011
Trial 1	1.1	S_TWN	F	0:06:31.818-0:06:32.084	CS3a	0.00638003	8	0.0239011
Trial 1	1.1	S_TWN	F	0:06:32.084-0:06:32.350	CS3a	0.00638003	8	0.0239012
Trial 1	1.1	S_TWN	F	0:06:32.350-0:06:32.616	CS3a	0.00638003	8	0.0239011
Trial 1	1.1	S_TWN	F	0:06:32.616-0:06:32.882	CS3a	0.00638003	8	0.0239012
Trial 1	1.1	S_TWN	F	0:06:32.882-0:06:33.148	CS3a	0.00638003	8	0.0239011
Trial 1	1.1	S_TWN	F	0:06:33.148-0:06:33.414	CS3a	0.00638003	8	0.0239011
Trial 1	1.1	S_TWN	F	0:06:33.414-0:06:33.680	CS3a	0.00638003	8	0.0239012
Trial 1	1.1	S_TWN	F	0:06:33.680-0:06:33.946	CS3a	0.00638003	8	0.0239011
Trial 1	1.1	S_TWN	F	0:06:33.946-0:06:34.212	CS3a	0.00638003	8	0.0239012
Trial 1	1.1	S_TWN	F	0:06:34.212-0:06:34.478	CS3a	0.00638003	8	0.0239011
Trial 1	1.1	S_TWN	F	0:06:34.478-0:06:34.744	CS3a	0.00638003	8	0.0239011
Trial 1	1.1	S_TWN	F	0:06:34.744-0:06:35.010	CS3a	0.00638003	8	0.0239012
Trial 1	1.1	S_TWN	F	0:06:35.010-0:06:35.276	CS3a	0.00638003	8	0.0239011
Trial 1	1.1	S_TWN	F	0:06:35.276-0:06:35.542	CS3a	0.00638003	8	0.0239012
Trial 1	1.1	S_TWN	F	0:06:35.542-0:06:35.808	CS3a	0.00638003	8	0.0239011
Trial 1	1.1	S_TWN	F	0:06:35.808-0:06:36.074	CS3a	0.00638003	8	0.0239011
Trial 1	1.1	S_TWN	F	0:06:36.074-0:06:36.340	CS3a	0.00638003	8	0.0239012
Trial 1	1.1	S_TWN	F	0:06:36.340-0:06:36.606	CS3a	0.00638003	8	0.0239011
Trial 1	1.1	S_TWN	F	0:06:36.606-0:06:36.872	CS3a	0.00638003	8	0.0239012
Trial 1	1.1	S_TWN	F	0:06:36.872-0:06:37.138	CS3a	0.00638003	8	0.0239011
Trial 1	1.1	S_TWN	F	0:06:37.138-0:06:37.404	CS3a	0.00638003	8	0.0239011
Trial 1	1.1	S_TWN	F	0:06:37.404-0:06:37.670	CS3a	0.00638003	8	0.0239012
Trial 1	1.1	S_TWN	F	0:06:37.670-0:06:37.936	CS3a	0.00638003	8	0.0239011
Trial 1	1.1	S_TWN	F	0:06:37.936-0:06:38.202	CS3a	0.00638003	8	0.0239012
Trial 1	1.1	S_TWN	F	0:06:38.202-0:06:38.468	CS3a	0.00638003	8	0.0239011
Trial 1	1.1	S_TWN	F	0:06:38.468-0:06:38.734	CS3a	0.00638003	8	0.0239011
Trial 1	1.1	S_TWN	F	0:06:38.734-0:06:39.000	CS3a	0.00638003	8	0.0239012
Trial 1	1.1	S_TWN	F	0:06:39.000-0:06:39.266	CS3a	0.00638003	8	0.0239011
Trial 1	1.1	S_TWN	F	0:06:39.266-0:06:39.532	CS3a	0.00558253	7	0.0239012
Trial 1	1.1	S_TWN	F	0:06:39.532-0:06:39.798	CS3a	0.00638003	8	0.0239012
Trial 1	1.1	S_TWN	F	0:06:39.798-0:06:40.064	CS3a	0.00638003	8	0.0239011
Trial 1	1.1	S_TWN	F	0:06:40.064-0:06:40.330	CS3b	0.00638003	8	0.0239012
Trial 1	1.1	S_TWN	F	0:06:40.330-0:06:40.596	CS3b	0.00638003	8	0.0239011
Trial 1	1.1	S_TWN	F	0:06:40.596-0:06:40.862	CS3b	0.00638003	8	0.0239011
Trial 1	1.1	S_TWN	F	0:06:40.862-0:06:41.128	CS3b	0.00638003	8	0.0239012
Trial 1	1.1	S_TWN	F	0:06:41.128-0:06:41.394	CS3b	0.00638003	8	0.0239011
Trial 1	1.1	S_TWN	F	0:06:41.394-0:06:41.660	CS3b	0.00638003	8	0.0239012
Trial 1	1.1	S_TWN	F	0:06:41.660-0:06:41.926	CS3b	0.00638003	8	0.0239011
Trial 1	1.1	S_TWN	F	0:06:41.926-0:06:42.192	CS3b	0.00638003	8	0.0239011
Trial 1	1.1	S_TWN	F	0:06:42.192-0:06:42.458	CS3b	0.00638003	8	0.0239012
Trial 1	1.1	S_TWN	F	0:06:42.458-0:06:42.724	CS3b	0.00638003	8	0.0239011
Trial 1	1.1	S_TWN	F	0:06:42.724-0:06:42.990	CS3b	0.00638003	8	0.0239012
Trial 1	1.1	S_TWN	F	0:06:42.990-0:06:43.256	CS3b	0.00638003	8	0.0239011
Trial 1	1.1	S_TWN	F	0:06:43.256-0:06:43.522	CS3b	0.00638003	8	0.0239011
Trial 1	1.1	S_TWN	F	0:06:43.522-0:06:43.788	CS3b	0.00638003	8	0.0239012
Trial 1	1.1	S_TWN	F	0:06:43.788-0:06:44.054	CS3b	0.00638003	8	0.0239011
Trial 1	1.1	S_TWN	F	0:06:44.054-0:06:44.320	CS3b	0.00638003	8	0.0239012
Trial 1	1.1	S_TWN	F	0:06:44.320-0:06:44.586	CS3b	0.00638003	8	0.0239011
Trial 1	1.1	S_TWN	F	0:06:44.586-0:06:44.852	CS3b	0.00638003	8	0.0239011
Trial 1	1.1	S_TWN	F	0:06:44.852-0:06:45.118	CS3b	0.00638003	8	0.0239012
Trial 1	1.1	S_TWN	F	0:06:45.118-0:06:45.384	CS3b	0.00638003	8	0.0239011
Trial 1	1.1	S_TWN	F	0:06:45.384-0:06:45.650	CS3b	0.849642	8	3.18298
Trial 1	1.1	S_TWN	F	0:06:45.650-0:06:45.916	CS3b	0.423987	8	1.58835
Trial 1	1.1	S_TWN	F	0:06:45.916-0:06:46.182	CS3b	0.485887	8	1.82025
Trial 1	1.1	S_TWN	F	0:06:46.182-0:06:46.448	CS3b	0.155048	8	0.580848
Trial 1	1.1	S_TWN	F	0:06:46.448-0:06:46.714	CS3b	0.00332279	8	0.012448
Trial 1	1.1	S_TWN	F	0:06:46.714-0:06:46.980	CS3b	0.00332279	8	0.012448
Trial 1	1.1	S_TWN	F	0:06:46.980-0:06:47.246	CS3b	0.00332279	8	0.012448
Trial 1	1.1	S_TWN	F	0:06:47.246-0:06:47.512	CS3b	0.00332279	8	0.012448
Trial 1	1.1	S_TWN	F	0:06:47.512-0:06:47.778	CS3b	0.00332279	8	0.012448
Trial 1	1.1	S_TWN	F	0:06:47.778-0:06:48.044	CS3b	0.00332279	8	0.012448
Trial 1	1.1	S_TWN	F	0:06:48.044-0:06:48.310	CS3b	0.00332279	8	0.012448
Trial 1	1.1	S_TWN	F	0:06:48.310-0:06:48.576	CS3b	0.00332279	8	0.012448
Trial 1	1.1	S_TWN	F	0:06:48.576-0:06:48.842	CS3b	0.00290744	7	0.012448
Trial 1	1.1	S_TWN	F	0:06:48.842-0:06:49.108	CS3b	0.00332279	8	0.012448
Trial 1	1.1	S_TWN	F	0:06:49.108-0:06:49.374	CS3b	0.00332279	8	0.012448
Trial 1	1.1	S_TWN	F	0:06:49.374-0:06:49.640	CS3b	0.00332279	8	0.012448
Trial 1	1.1	S_TWN	F	0:06:49.640-0:06:49.906	CS3b	0.00332279	8	0.012448
Trial 1	1.1	S_TWN	F	0:06:49.906-0:06:50.172	CS3b	0.00332279	8	0.012448
Trial 1	1.1	S_TWN	F	0:06:50.172-0:06:50.438	IT3	0.00332279	8	0.012448
Trial 1	1.1	S_TWN	F	0:06:50.438-0:06:50.704	IT3	0.00332279	8	0.012448
Trial 1	1.1	S_TWN	F	0:06:50.704-0:06:50.970	IT3	0.00332279	8	0.012448
Trial 1	1.1	S_TWN	F	0:06:50.970-0:06:51.236	IT3	0.00332279	8	0.012448
Trial 1	1.1	S_TWN	F	0:06:51.236-0:06:51.502	IT3	0.00332279	8	0.012448
Trial 1	1.1	S_TWN	F	0:06:51.502-0:06:51.768	IT3	0.00332279	8	0.012448
Trial 1	1.1	S_TWN	F	0:06:51.768-0:06:52.034	IT3	0.00332279	8	0.012448
Trial 1	1.1	S_TWN	F	0:06:52.034-0:06:52.300	IT3	0.00332279	8	0.012448
Trial 1	1.1	S_TWN	F	0:06:52.300-0:06:52.566	IT3	0.00332279	8	0.012448
Trial 1	1.1	S_TWN	F	0:06:52.566-0:06:52.832	IT3	0.00332279	8	0.012448
Trial 1	1.1	S_TWN	F	0:06:52.832-0:06:53.098	IT3	0.00332279	8	0.012448
Trial 1	1.1	S_TWN	F	0:06:53.098-0:06:53.364	IT3	0.00332279	8	0.012448
Trial 1	1.1	S_TWN	F	0:06:53.364-0:06:53.630	IT3	0.00332279	8	0.012448
Trial 1	1.1	S_TWN	F	0:06:53.630-0:06:53.896	IT3	0.00332279	8	0.012448
Trial 1	1.1	S_TWN	F	0:06:53.896-0:06:54.162	IT3	0.00332279	8	0.012448
Trial 1	1.1	S_TWN	F	0:06:54.162-0:06:54.428	IT3	0.00332279	8	0.012448
Trial 1	1.1	S_TWN	F	0:06:54.428-0:06:54.694	IT3	0.00332279	8	0.012448
Trial 1	1.1	S_TWN	F	0:06:54.694-0:06:54.960	IT3	0.00332279	8	0.012448
Trial 1	1.1	S_TWN	F	0:06:54.960-0:06:55.226	IT3	0.00332279	8	0.012448
Trial 1	1.1	S_TWN	F	0:06:55.226-0:06:55.492	IT3	0.00332279	8	0.012448
Trial 1	1.1	S_TWN	F	0:06:55.492-0:06:55.758	IT3	0.00332279	8	0.012448
Trial 1	1.1	S_TWN	F	0:06:55.758-0:06:56.024	IT3	0.00332279	8	0.012448
Trial 1	1.1	S_TWN	F	0:06:56.024-0:06:56.290	IT3	0.00332279	8	0.012448
Trial 1	1.1	S_TWN	F	0:06:56.290-0:06:56.556	IT3	0.00332279	8	0.012448
Trial 1	1.1	S_TWN	F	0:06:56.556-0:06:56.822	IT3	0.00332279	8	0.012448
Trial 1	1.1	S_TWN	F	0:06:56.822-0:06:57.088	IT3	0.00332279	8	0.012448
Trial 1	1.1	S_TWN	F	0:06:57.088-0:06:57.354	IT3	0.00332279	8	0.012448
Trial 1	1.1	S_TWN	F	0:06:57.354-0:06:57.620	IT3	0.00332279	8	0.012448
Trial 1	1.1	S_TWN	F	0:06:57.620-0:06:57.886	IT3	0.00332279	8	0.012448
Trial 1	1.1	S_TWN	F	0:06:57.886-0:06:58.152	IT3	0.00332279	8	0.012448
Trial 1	1.1	S_TWN	F	0:06:58.152-0:06:58.418	IT3	0.00290744	7	0.012448
Trial 1	1.1	S_TWN	F	0:06:58.418-0:06:58.684	IT3	0.00332279	8	0.012448
Trial 1	1.1	S_TWN	F	0:06:58.684-0:06:58.950	IT3	0.00332279	8	0.012448
Trial 1	1.1	S_TWN	F	0:06:58.950-0:06:59.216	IT3	0.00332279	8	0.012448
Trial 1	1.1	S_TWN	F	0:06:59.216-0:06:59.482	IT3	0.00332279	8	0.012448
Trial 1	1.1	S_TWN	F	0:06:59.482-0:06:59.748	IT3	0.00332279	8	0.012448
Trial 1	1.1	S_TWN	F	0:06:59.748-0:07:00.014	IT3	0.00332279	8	0.012448
Trial 1	1.1	S_TWN	F	0:07:00.014-0:07:00.280	IT3	0.00332279	8	0.012448
Trial 1	1.1	S_TWN	F	0:07:00.280-0:07:00.546	IT3	0.00332279	8	0.012448
Trial 1	1.1	S_TWN	F	0:07:00.546-0:07:00.812	IT3	0.00332279	8	0.012448
Trial 1	1.1	S_TWN	F	0:07:00.812-0:07:01.078	IT3	0.00332279	8	0.012448
Trial 1	1.1	S_TWN	F	0:07:01.078-0:07:01.344	IT3	0.00332279	8	0.012448
Trial 1	1.1	S_TWN	F	0:07:01.344-0:07:01.610	IT3	0.00332279	8	0.012448
Trial 1	1.1	S_TWN	F	0:07:01.610-0:07:01.876	IT3	0.00332279	8	0.012448
Trial 1	1.1	S_TWN	F	0:07:01.876-0:07:02.142	IT3	0.00332279	8	0.012448
Trial 1	1.1	S_TWN	F	0:07:02.142-0:07:02.408	IT3	0.00332279	8	0.012448
Trial 1	1.1	S_TWN	F	0:07:02.408-0:07:02.674	IT3	0.00332279	8	0.012448
Trial 1	1.1	S_TWN	F	0:07:02.674-0:07:02.940	IT3	0.00332279	8	0.012448
Trial 1	1.1	S_TWN	F	0:07:02.940-0:07:03.206	IT3	0.00332279	8	0.012448
Trial 1	1.1	S_TWN	F	0:07:03.206-0:07:03.472	IT3	0.00332279	8	0.012448
Trial 1	1.1	S_TWN	F	0:07:03.472-0:07:03.738	IT3	0.00332279	8	0.012448
Trial 1	1.1	S_TWN	F	0:07:03.738-0:07:04.004	IT3	0.00332279	8	0.012448
Trial 1	1.1	S_TWN	F	0:07:04.004-0:07:04.270	IT3	0.00332279	8	0.012448
Trial 1	1.1	S_TWN	F	0:07:04.270-0:07:04.536	IT3	0.00332279	8	0.012448
Trial 1	1.1	S_TWN	F	0:07:04.536-0:07:04.802	IT3	0.00332279	8	0.012448
Trial 1	1.1	S_TWN	F	0:07:04.802-0:07:05.068	IT3	0.00332279	8	0.012448
Trial 1	1.1	S_TWN	F	0:07:05.068-0:07:05.334	IT3	0.00332279	8	0.012448
Trial 1	1.1	S_TWN	F	0:07:05.334-0:07:05.600	IT3	0.00332279	8	0.012448
Trial 1	1.1	S_TWN	F	0:07:05.600-0:07:05.866	IT3	0.00332279	8	0.012448
Trial 1	1.1	S_TWN	F	0:07:05.866-0:07:06.132	IT3	0.00332279	8	0.012448
Trial 1	1.1	S_TWN	F	0:07:06.132-0:07:06.398	IT3	0.00332279	8	0.012448
Trial 1	1.1	S_TWN	F	0:07:06.398-0:07:06.664	IT3	0.00332279	8	0.012448
Trial 1	1.1	S_TWN	F	0:07:06.664-0:07:06.930	IT3	0.00332279	8	0.012448
Trial 1	1.1	S_TWN	F	0:07:06.930-0:07:07.196	IT3	0.00332279	8	0.012448
Trial 1	1.1	S_TWN	F	0:07:07.196-0:07:07.462	IT3	0.00332279	8	0.012448
Trial 1	1.1	S_TWN	F	0:07:07.462-0:07:07.728	IT3	0.00332279	8	0.012448
Trial 1	1.1	S_TWN	F	0:07:07.728-0:07:07.994	IT3	0.00290744	7	0.012448
Trial 1	1.1	S_TWN	F	0:07:07.994-0:07:08.260	IT3	0.00332279	8	0.012448
Trial 1	1.1	S_TWN	F	0:07:08.260-0:07:08.526	IT3	0.00332279	8	0.012448
Trial 1	1.1	S_TWN	F	0:07:08.526-0:07:08.792	IT3	0.00332279	8	0.012448
Trial 1	1.1	S_TWN	F	0:07:08.792-0:07:09.058	IT3	0.00332279	8	0.012448
Trial 1	1.1	S_TWN	F	0:07:09.058-0:07:09.324	IT3	0.00332279	8	0.012448
Trial 1	1.1	S_TWN	F	0:07:09.324-0:07:09.590	IT3	0.00332279	8	0.012448
Trial 1	1.1	S_TWN	F	0:07:09.590-0:07:09.856	IT3	0.00332279	8	0.012448
Trial 1	1.1	S_TWN	F	0:07:09.856-0:07:10.122	IT3	0.00332279	8	0.012448
Trial 1	1.1	S_TWN	F	0:07:10.122-0:07:10.388	IT3	0.00332279	8	0.012448
Trial 1	1.1	S_TWN	F	0:07:10.388-0:07:10.654	IT3	0.00332279	8	0.012448
Trial 1	1.1	S_TWN	F	0:07:10.654-0:07:10.920	IT3	0.00332279	8	0.012448
Trial 1	1.1	S_TWN	F	0:07:10.920-0:07:11.186	IT3	0.00332279	8	0.012448
Trial 1	1.1	S_TWN	F	0:07:11.186-0:07:11.452	IT3	0.00332279	8	0.012448
Trial 1	1.1	S_TWN	F	0:07:11.452-0:07:11.718	IT3	0.00332279	8	0.012448
Trial 1	1.1	S_TWN	F	0:07:11.718-0:07:11.984	IT3	0.00332279	8	0.012448
Trial 1	1.1	S_TWN	F	0:07:11.984-0:07:12.250	IT3	0.00332279	8	0.012448
Trial 1	1.1	S_TWN	F	0:07:12.250-0:07:12.516	IT3	0.00332279	8	0.012448
Trial 1	1.1	S_TWN	F	0:07:12.516-0:07:12.782	IT3	0.00332279	8	0.012448
Trial 1	1.1	S_TWN	F	0:07:12.782-0:07:13.048	IT3	0.00332279	8	0.012448
Trial 1	1.1	S_TWN	F	0:07:13.048-0:07:13.314	IT3	0.00332279	8	0.012448
Trial 1	1.1	S_TWN	F	0:07:13.314-0:07:13.580	IT3	0.00332279	8	0.012448
Trial 1	1.1	S_TWN	F	0:07:13.580-0:07:13.846	IT3	0.00332279	8	0.012448
Trial 1	1.1	S_TWN	F	0:07:13.846-0:07:14.112	IT3	0.00332279	8	0.012448
Trial 1	1.1	S_TWN	F	0:07:14.112-0:07:14.378	IT3	0.00332279	8	0.012448
Trial 1	1.1	S_TWN	F	0:07:14.378-0:07:14.644	IT3	0.00332279	8	0.012448
Trial 1	1.1	S_TWN	F	0:07:14.644-0:07:14.910	IT3	0.00332279	8	0.012448
Trial 1	1.1	S_TWN	F	0:07:14.910-0:07:15.176	IT3	0.00332279	8	0.012448
Trial 1	1.1	S_TWN	F	0:07:15.176-0:07:15.442	IT3	0.00332279	8	0.012448
Trial 1	1.1	S_TWN	F	0:07:15.442-0:07:15.708	IT3	0.00332279	8	0.012448
Trial 1	1.1	S_TWN	F	0:07:15.708-0:07:15.974	IT3	0.00332279	8	0.012448
Trial 1	1.1	S_TWN	F	0:07:15.974-0:07:16.240	IT3	0.00332279	8	0.012448
Trial 1	1.1	S_TWN	F	0:07:16.240-0:07:16.506	IT3	0.00332279	8	0.012448
Trial 1	1.1	S_TWN	F	0:07:16.506-0:07:16.772	IT3	0.00332279	8	0.012448
Trial 1	1.1	S_TWN	F	0:07:16.772-0:07:17.038	IT3	0.00332279	8	0.012448
Trial 1	1.1	S_TWN	F	0:07:17.038-0:07:17.304	IT3	0.00332279	8	0.012448
Trial 1	1.1	S_TWN	F	0:07:17.304-0:07:17.570	IT3	0.00290744	7	0.012448
Trial 1	1.1	S_TWN	F	0:07:17.570-0:07:17.836	IT3	0.00332279	8	0.012448
Trial 1	1.1	S_TWN	F	0:07:17.836-0:07:18.102	IT3	0.00332279	8	0.012448
Trial 1	1.1	S_TWN	F	0:07:18.102-0:07:18.368	IT3	0.00332279	8	0.012448
Trial 1	1.1	S_TWN	F	0:07:18.368-0:07:18.634	IT3	0.00332279	8	0.012448
Trial 1	1.1	S_TWN	F	0:07:18.634-0:07:18.900	IT3	0.00332279	8	0.012448
Trial 1	1.1	S_TWN	F	0:07:18.900-0:07:19.166	IT3	0.00332279	8	0.012448
Trial 1	1.1	S_TWN	F	0:07:19.166-0:07:19.432	IT3	0.00332279	8	0.012448
Trial 1	1.1	S_TWN	F	0:07:19.432-0:07:19.698	IT3	0.00332279	8	0.012448
Trial 1	1.1	S_TWN	F	0:07:19.698-0:07:19.964	IT3	0.00332279	8	0.012448
Trial 1	1.1	S_TWN	F	0:07:19.964-0:07:20.230	IT3	0.00332279	8	0.012448
Trial 1	1.1	S_TWN	F	0:07:20.230-0:07:20.496	IT3	0.00332279	8	0.012448
Trial 1	1.1	S_TWN	F	0:07:20.496-0:07:20.762	IT3	0.00332279	8	0.012448
Trial 1	1.1	S_TWN	F	0:07:20.762-0:07:21.028	IT3	0.00332279	8	0.012448
Trial 1	1.1	S_TWN	F	0:07:21.028-0:07:21.294	IT3	0.00332279	8	0.012448
Trial 1	1.1	S_TWN	F	0:07:21.294-0:07:21.560	IT3	0.00332279	8	0.012448
Trial 1	1.1	S_TWN	F	0:07:21.560-0:07:21.826	IT3	0.00332279	8	0.012448
Trial 1	1.1	S_TWN	F	0:07:21.826-0:07:22.092	IT3	0.00332279	8	0.012448
Trial 1	1.1	S_TWN	F	0:07:22.092-0:07:22.358	IT3	0.00332279	8	0.012448
Trial 1	1.1	S_TWN	F	0:07:22.358-0:07:22.624	IT3	0.00332279	8	0.012448
Trial 1	1.1	S_TWN	F	0:07:22.624-0:07:22.890	IT3	0.00332279	8	0.012448
Trial 1	1.1	S_TWN	F	0:07:22.890-0:07:23.156	IT3	0.00332279	8	0.012448
Trial 1	1.1	S_TWN	F	0:07:23.156-0:07:23.422	IT3	0.00332279	8	0.012448
Trial 1	1.1	S_TWN	F	0:07:23.422-0:07:23.688	IT3	0.00332279	8	0.012448
Trial 1	1.1	S_TWN	F	0:07:23.688-0:07:23.954	IT3	0.00332279	8	0.012448
Trial 1	1.1	S_TWN	F	0:07:23.954-0:07:24.220	IT3	0.00332279	8	0.012448
Trial 1	1.1	S_TWN	F	0:07:24.220-0:07:24.486	IT3	0.00332279	8	0.012448
Trial 1	1.1	S_TWN	F	0:07:24.486-0:07:24.752	IT3	0.00332279	8	0.012448
Trial 1	1.1	S_TWN	F	0:07:24.752-0:07:25.018	IT3	0.00332279	8	0.012448
Trial 1	1.1	S_TWN	F	0:07:25.018-0:07:25.284	IT3	0.00332279	8	0.012448
Trial 1	1.1	S_TWN	F	0:07:25.284-0:07:25.550	IT3	0.00332279	8	0.012448
Trial 1	1.1	S_TWN	F	0:07:25.550-0:07:25.816	IT3	0.00332279	8	0.012448
Trial 1	1.1	S_TWN	F	0:07:25.816-0:07:26.082	IT3	0.00332279	8	0.012448
Trial 1	1.1	S_TWN	F	0:07:26.082-0:07:26.348	IT3	0.00332279	8	0.012448
Trial 1	1.1	S_TWN	F	0:07:26.348-0:07:26.614	IT3	0.00332279	8	0.012448
Trial 1	1.1	S_TWN	F	0:07:26.614-0:07:26.880	IT3	0.00290744	7	0.012448
Trial 1	1.1	S_TWN	F	0:07:26.880-0:07:27.146	IT3	0.00332279	8	0.012448
Trial 1	1.1	S_TWN	F	0:07:27.146-0:07:27.412	IT3	0.00332279	8	0.012448
Trial 1	1.1	S_TWN	F	0:07:27.412-0:07:27.678	IT3	0.00332279	8	0.012448
Trial 1	1.1	S_TWN	F	0:07:27.678-0:07:27.944	IT3	0.00332279	8	0.012448
Trial 1	1.1	S_TWN	F	0:07:27.944-0:07:28.210	IT3	0.00332279	8	0.012448
Trial 1	1.1	S_TWN	F	0:07:28.210-0:07:28.476	IT3	0.00332279	8	0.012448
Trial 1	1.1	S_TWN	F	0:07:28.476-0:07:28.742	IT3	0.00332279	8	0.012448
Trial 1	1.1	S_TWN	F	0:07:28.742-0:07:29.008	IT3	0.00332279	8	0.012448
Trial 1	1.1	S_TWN	F	0:07:29.008-0:07:29.274	IT3	0.00332279	8	0.012448
Trial 1	1.1	S_TWN	F	0:07:29.274-0:07:29.540	IT3	0.00332279	8	0.012448
Trial 1	1.1	S_TWN	F	0:07:29.540-0:07:29.806	IT3	0.00332279	8	0.012448
Trial 1	1.1	S_TWN	F	0:07:29.806-0:07:30.072	IT3	0.00332279	8	0.012448
Trial 1	1.1	S_TWN	F	0:07:30.072-0:07:30.338	IT3	0.00332279	8	0.012448
Trial 1	1.1	S_TWN	F	0:07:30.338-0:07:30.604	IT3	0.00332279	8	0.012448
Trial 1	1.1	S_TWN	F	0:07:30.604-0:07:30.870	IT3	0.00332279	8	0.012448
Trial 1	1.1	S_TWN	F	0:07:30.870-0:07:31.136	IT3	0.00332279	8	0.012448
Trial 1	1.1	S_TWN	F	0:07:31.136-0:07:31.402	IT3	0.00332279	8	0.012448
Trial 1	1.1	S_TWN	F	0:07:31.402-0:07:31.668	IT3	0.00332279	8	0.012448
Trial 1	1.1	S_TWN	F	0:07:31.668-0:07:31.934	IT3	0.00332279	8	0.012448
Trial 1	1.1	S_TWN	F	0:07:31.934-0:07:32.200	IT3	0.00332279	8	0.012448
Trial 1	1.1	S_TWN	F	0:07:32.200-0:07:32.466	IT3	0.00332279	8	0.012448
Trial 1	1.1	S_TWN	F	0:07:32.466-0:07:32.732	IT3	0.00332279	8	0.012448
Trial 1	1.1	S_TWN	F	0:07:32.732-0:07:32.998	IT3	0.00332279	8	0.012448
Trial 1	1.1	S_TWN	F	0:07:32.998-0:07:33.264	IT3	0.00332279	8	0.012448
Trial 1	1.1	S_TWN	F	0:07:33.264-0:07:33.530	IT3	0.00332279	8	0.012448
Trial 1	1.1	S_TWN	F	0:07:33.530-0:07:33.796	IT3	0.00332279	8	0.012448
Trial 1	1.1	S_TWN	F	0:07:33.796-0:07:34.062	IT3	0.00332279	8	0.012448
Trial 1	1.1	S_TWN	F	0:07:34.062-0:07:34.328	IT3	0.00332279	8	0.012448
Trial 1	1.1	S_TWN	F	0:07:34.328-0:07:34.594	IT3	0.00332279	8	0.012448
Trial 1	1.1	S_TWN	F	0:07:34.594-0:07:34.860	IT3	0.00332279	8	0.012448
Trial 1	1.1	S_TWN	F	0:07:34.860-0:07:35.126	IT3	0.00332279	8	0.012448
Trial 1	1.1	S_TWN	F	0:07:35.126-0:07:35.392	IT3	0.00332279	8	0.012448
Trial 1	1.1	S_TWN	F	0:07:35.392-0:07:35.658	IT3	0.00332279	8	0.012448
Trial 1	1.1	S_TWN	F	0:07:35.658-0:07:35.924	IT3	0.00332279	8	0.012448
Trial 1	1.1	S_TWN	F	0:07:35.924-0:07:36.190	IT3	0.00332279	8	0.012448
Trial 1	1.1	S_TWN	F	0:07:36.190-0:07:36.456	IT3	0.00290744	7	0.012448
Trial 1	1.1	S_TWN	F	0:07:36.456-0:07:36.722	IT3	0.00332279	8	0.012448
Trial 1	1.1	S_TWN	F	0:07:36.722-0:07:36.988	IT3	0.00332279	8	0.012448
Trial 1	1.1	S_TWN	F	0:07:36.988-0:07:37.254	IT3	0.00332279	8	0.012448
Trial 1	1.1	S_TWN	F	0:07:37.254-0:07:37.520	IT3	0.00332279	8	0.012448
Trial 1	1.1	S_TWN	F	0:07:37.520-0:07:37.786	IT3	0.00332279	8	0.012448
Trial 1	1.1	S_TWN	F	0:07:37.786-0:07:38.052	IT3	0.00332279	8	0.012448
Trial 1	1.1	S_TWN	F	0:07:38.052-0:07:38.318	IT3	0.00332279	8	0.012448
Trial 1	1.1	S_TWN	F	0:07:38.318-0:07:38.584	IT3	0.00332279	8	0.012448
Trial 1	1.1	S_TWN	F	0:07:38.584-0:07:38.850	IT3	0.00332279	8	0.012448
Trial 1	1.1	S_TWN	F	0:07:38.850-0:07:39.116	IT3	0.00332279	8	0.012448
Trial 1	1.1	S_TWN	F	0:07:39.116-0:07:39.382	IT3	0.00332279	8	0.012448
Trial 1	1.1	S_TWN	F	0:07:39.382-0:07:39.648	IT3	0.00332279	8	0.012448
Trial 1	1.1	S_TWN	F	0:07:39.648-0:07:39.914	IT3	0.00332279	8	0.012448
Trial 1	1.1	S_TWN	F	0:07:39.914-0:07:40.180	IT3	0.00332279	8	0.012448
Trial 1	1.1	S_TWN	F	0:07:40.180-0:07:40.446	IT3	0.00332279	8	0.012448
Trial 1	1.1	S_TWN	F	0:07:40.446-0:07:40.712	IT3	0.00332279	8	0.012448
Trial 1	1.1	S_TWN	F	0:07:40.712-0:07:40.978	IT3	0.00332279	8	0.012448
Trial 1	1.1	S_TWN	F	0:07:40.978-0:07:41.244	IT3	0.00332279	8	0.012448
Trial 1	1.1	S_TWN	F	0:07:41.244-0:07:41.510	IT3	0.00332279	8	0.012448
Trial 1	1.1	S_TWN	F	0:07:41.510-0:07:41.776	IT3	0.00332279	8	0.012448
Trial 1	1.1	S_TWN	F	0:07:41.776-0:07:42.042	IT3	0.00332279	8	0.012448
Trial 1	1.1	S_TWN	F	0:07:42.042-0:07:42.308	IT3	0.00332279	8	0.012448
Trial 1	1.1	S_TWN	F	0:07:42.308-0:07:42.574	IT3	0.00332279	8	0.012448
Trial 1	1.1	S_TWN	F	0:07:42.574-0:07:42.840	IT3	0.00332279	8	0.012448
Trial 1	1.1	S_TWN	F	0:07:42.840-0:07:43.106	IT3	0.00332279	8	0.012448
Trial 1	1.1	S_TWN	F	0:07:43.106-0:07:43.372	IT3	0.00332279	8	0.012448
Trial 1	1.1	S_TWN	F	0:07:43.372-0:07:43.638	IT3	0.00332279	8	0.012448
Trial 1	1.1	S_TWN	F	0:07:43.638-0:07:43.904	IT3	0.00332279	8	0.012448
Trial 1	1.1	S_TWN	F	0:07:43.904-0:07:44.170	IT3	0.00332279	8	0.012448
Trial 1	1.1	S_TWN	F	0:07:44.170-0:07:44.436	IT3	0.00332279	8	0.012448
Trial 1	1.1	S_TWN	F	0:07:44.436-0:07:44.702	IT3	0.00332279	8	0.012448
Trial 1	1.1	S_TWN	F	0:07:44.702-0:07:44.968	IT3	0.00332279	8	0.012448
Trial 1	1.1	S_TWN	F	0:07:44.968-0:07:45.234	IT3	0.00332279	8	0.012448
Trial 1	1.1	S_TWN	F	0:07:45.234-0:07:45.500	IT3	0.00332279	8	0.012448
Trial 1	1.1	S_TWN	F	0:07:45.500-0:07:45.766	IT3	0.00332279	8	0.012448
Trial 1	1.1	S_TWN	F	0:07:45.766-0:07:46.032	IT3	0.00290744	7	0.012448
Trial 1	1.1	S_TWN	F	0:07:46.032-0:07:46.298	IT3	0.00332279	8	0.012448
Trial 1	1.1	S_TWN	F	0:07:46.298-0:07:46.564	IT3	0.00332279	8	0.012448
Trial 1	1.1	S_TWN	F	0:07:46.564-0:07:46.830	IT3	0.00332279	8	0.012448
Trial 1	1.1	S_TWN	F	0:07:46.830-0:07:47.096	IT3	0.00332279	8	0.012448
Trial 1	1.1	S_TWN	F	0:07:47.096-0:07:47.362	IT3	0.00332279	8	0.012448
Trial 1	1.1	S_TWN	F	0:07:47.362-0:07:47.628	IT3	0.00332279	8	0.012448
Trial 1	1.1	S_TWN	F	0:07:47.628-0:07:47.894	IT3	0.00332279	8	0.012448
Trial 1	1.1	S_TWN	F	0:07:47.894-0:07:48.160	IT3	0.00332279	8	0.012448
Trial 1	1.1	S_TWN	F	0:07:48.160-0:07:48.426	IT3	0.00332279	8	0.012448
Trial 1	1.1	S_TWN	F	0:07:48.426-0:07:48.692	IT3	0.00332279	8	0.012448
Trial 1	1.1	S_TWN	F	0:07:48.692-0:07:48.958	IT3	0.00332279	8	0.012448
Trial 1	1.1	S_TWN	F	0:07:48.958-0:07:49.224	IT3	0.00332279	8	0.012448
Trial 1	1.1	S_TWN	F	0:07:49.224-0:07:49.490	IT3	0.00332279	8	0.012448
Trial 1	1.1	S_TWN	F	0:07:49.490-0:07:49.756	IT3	0.00332279	8	0.012448
Trial 1	1.1	S_TWN	F	0:07:49.756-0:07:50.022	IT3	0.00332279	8	0.012448
Trial 1	1.1	S_TWN	F	0:07:50.022-0:07:50.288	IT3	0.00332279	8	0.012448
Trial 1	1.1	S_TWN	F	0:07:50.288-0:07:50.554	IT3	0.00332279	8	0.012448
Trial 1	1.1	S_TWN	F	0:07:50.554-0:07:50.820	IT3	0.00332279	8	0.012448
Trial 1	1.1	S_TWN	F	0:07:50.820-0:07:51.086	IT3	0.00332279	8	0.012448
Trial 1	1.1	S_TWN	F	0:07:51.086-0:07:51.352	IT3	0.00332279	8	0.012448
Trial 1	1.1	S_TWN	F	0:07:51.352-0:07:51.618	IT3	0.00332279	8	0.012448
Trial 1	1.1	S_TWN	F	0:07:51.618-0:07:51.884	IT3	0.00332279	8	0.012448
Trial 1	1.1	S_TWN	F	0:07:51.884-0:07:52.150	IT3	0.00332279	8	0.012448
Trial 1	1.1	S_TWN	F	0:07:52.150-0:07:52.416	IT3	0.00332279	8	0.012448
Trial 1	1.1	S_TWN	F	0:07:52.416-0:07:52.682	IT3	0.00332279	8	0.012448
Trial 1	1.1	S_TWN	F	0:07:52.682-0:07:52.948	IT3	0.00332279	8	0.012448
Trial 1	1.1	S_TWN	F	0:07:52.948-0:07:53.214	IT3	0.00332279	8	0.012448
Trial 1	1.1	S_TWN	F	0:07:53.214-0:07:53.480	IT3	0.00332279	8	0.012448
Trial 1	1.1	S_TWN	F	0:07:53.480-0:07:53.746	IT3	0.00332279	8	0.012448
Trial 1	1.1	S_TWN	F	0:07:53.746-0:07:54.012	IT3	0.00332279	8	0.012448
Trial 1	1.1	S_TWN	F	0:07:54.012-0:07:54.278	IT3	0.00332279	8	0.012448
Trial 1	1.1	S_TWN	F	0:07:54.278-0:07:54.544	IT3	0.00332279	8	0.012448
Trial 1	1.1	S_TWN	F	0:07:54.544-0:07:54.810	IT3	0.00332279	8	0.012448
Trial 1	1.1	S_TWN	F	0:07:54.810-0:07:55.076	IT3	0.00332279	8	0.012448
Trial 1	1.1	S_TWN	F	0:07:55.076-0:07:55.342	IT3	0.00290744	7	0.012448
Trial 1	1.1	S_TWN	F	0:07:55.342-0:07:55.608	IT3	0.00332279	8	0.012448
Trial 1	1.1	S_TWN	F	0:07:55.608-0:07:55.874	IT3	0.00332279	8	0.012448
Trial 1	1.1	S_TWN	F	0:07:55.874-0:07:56.140	IT3	0.00332279	8	0.012448
Trial 1	1.1	S_TWN	F	0:07:56.140-0:07:56.406	IT3	0.00332279	8	0.012448
Trial 1	1.1	S_TWN	F	0:07:56.406-0:07:56.672	IT3	0.00332279	8	0.012448
Trial 1	1.1	S_TWN	F	0:07:56.672-0:07:56.938	IT3	0.00332279	8	0.012448
Trial 1	1.1	S_TWN	F	0:07:56.938-0:07:57.204	IT3	0.00332279	8	0.012448
Trial 1	1.1	S_TWN	F	0:07:57.204-0:07:57.470	IT3	0.00332279	8	0.012448
Trial 1	1.1	S_TWN	F	0:07:57.470-0:07:57.736	IT3	0.00332279	8	0.012448
Trial 1	1.1	S_TWN	F	0:07:57.736-0:07:58.002	IT3	0.00332279	8	0.012448
Trial 1	1.1	S_TWN	F	0:07:58.002-0:07:58.268	IT3	0.00332279	8	0.012448
Trial 1	1.1	S_TWN	F	0:07:58.268-0:07:58.534	IT3	0.00332279	8	0.012448
Trial 1	1.1	S_TWN	F	0:07:58.534-0:07:58.800	IT3	0.00332279	8	0.012448
Trial 1	1.1	S_TWN	F	0:07:58.800-0:07:59.066	IT3	0.00332279	8	0.012448
Trial 1	1.1	S_TWN	F	0:07:59.066-0:07:59.332	IT3	0.00332279	8	0.012448
Trial 1	1.1	S_TWN	F	0:07:59.332-0:07:59.598	IT3	0.00332279	8	0.012448
Trial 1	1.1	S_TWN	F	0:07:59.598-0:07:59.864	IT3	0.00332279	8	0.012448
Trial 1	1.1	S_TWN	F	0:07:59.864-0:08:00.130	IT3	0.00332279	8	0.012448
Trial 1	1.1	S_TWN	F	0:08:00.130-0:08:00.396	IT3	0.00332279	8	0.012448
Trial 1	1.1	S_TWN	F	0:08:00.396-0:08:00.662	IT3	0.00332279	8	0.012448
Trial 1	1.1	S_TWN	F	0:08:00.662-0:08:00.928	IT3	0.00332279	8	0.012448
Trial 1	1.1	S_TWN	F	0:08:00.928-0:08:01.194	IT3	0.00332279	8	0.012448
Trial 1	1.1	S_TWN	F	0:08:01.194-0:08:01.460	IT3	0.00332279	8	0.012448
Trial 1	1.1	S_TWN	F	0:08:01.460-0:08:01.726	IT3	0.00332279	8	0.012448
Trial 1	1.1	S_TWN	F	0:08:01.726-0:08:01.992	IT3	0.00332279	8	0.012448
Trial 1	1.1	S_TWN	F	0:08:01.992-0:08:02.258	IT3	0.00332279	8	0.012448
Trial 1	1.1	S_TWN	F	0:08:02.258-0:08:02.524	IT3	0.00332279	8	0.012448
Trial 1	1.1	S_TWN	F	0:08:02.524-0:08:02.790	IT3	0.00332279	8	0.012448
Trial 1	1.1	S_TWN	F	0:08:02.790-0:08:03.056	IT3	0.00332279	8	0.012448
Trial 1	1.1	S_TWN	F	0:08:03.056-0:08:03.322	IT3	0.00332279	8	0.012448
Trial 1	1.1	S_TWN	F	0:08:03.322-0:08:03.588	IT3	0.00332279	8	0.012448
Trial 1	1.1	S_TWN	F	0:08:03.588-0:08:03.854	IT3	0.00332279	8	0.012448
Trial 1	1.1	S_TWN	F	0:08:03.854-0:08:04.120	IT3	0.00332279	8	0.012448
Trial 1	1.1	S_TWN	F	0:08:04.120-0:08:04.386	IT3	0.00332279	8	0.012448
Trial 1	1.1	S_TWN	F	0:08:04.386-0:08:04.652	IT3	0.00332279	8	0.012448
Trial 1	1.1	S_TWN	F	0:08:04.652-0:08:04.918	IT3	0.00290744	7	0.012448
Trial 1	1.1	S_TWN	F	0:08:04.918-0:08:05.184	IT3	0.00332279	8	0.012448
Trial 1	1.1	S_TWN	F	0:08:05.184-0:08:05.450	IT3	0.00332279	8	0.012448
Trial 1	1.1	S_TWN	F	0:08:05.450-0:08:05.716	IT3	0.00332279	8	0.012448
Trial 1	1.1	S_TWN	F	0:08:05.716-0:08:05.982	IT3	0.00332279	8	0.012448
Trial 1	1.1	S_TWN	F	0:08:05.982-0:08:06.248	IT3	0.00332279	8	0.012448
Trial 1	1.1	S_TWN	F	0:08:06.248-0:08:06.514	IT3	0.00332279	8	0.012448
Trial 1	1.1	S_TWN	F	0:08:06.514-0:08:06.780	IT3	0.00332279	8	0.012448
Trial 1	1.1	S_TWN	F	0:08:06.780-0:08:07.046	IT3	0.00332279	8	0.012448
Trial 1	1.1	S_TWN	F	0:08:07.046-0:08:07.312	IT3	0.00332279	8	0.012448
Trial 1	1.1	S_TWN	F	0:08:07.312-0:08:07.578	IT3	0.00332279	8	0.012448
Trial 1	1.1	S_TWN	F	0:08:07.578-0:08:07.844	IT3	0.00332279	8	0.012448
Trial 1	1.1	S_TWN	F	0:08:07.844-0:08:08.110	IT3	0.00332279	8	0.012448
Trial 1	1.1	S_TWN	F	0:08:08.110-0:08:08.376	IT3	0.00332279	8	0.012448
Trial 1	1.1	S_TWN	F	0:08:08.376-0:08:08.642	IT3	0.00332279	8	0.012448
Trial 1	1.1	S_TWN	F	0:08:08.642-0:08:08.908	IT3	0.00332279	8	0.012448
Trial 1	1.1	S_TWN	F	0:08:08.908-0:08:09.174	IT3	0.00332279	8	0.012448
Trial 1	1.1	S_TWN	F	0:08:09.174-0:08:09.440	IT3	0.00332279	8	0.012448
Trial 1	1.1	S_TWN	F	0:08:09.440-0:08:09.706	IT3	0.00332279	8	0.012448
Trial 1	1.1	S_TWN	F	0:08:09.706-0:08:09.972	IT3	0.00332279	8	0.012448
Trial 1	1.1	S_TWN	F	0:08:09.972-0:08:10.238	IT3	0.00332279	8	0.012448
Trial 1	1.1	S_TWN	F	0:08:10.238-0:08:10.504	IT3	0.00332279	8	0.012448
Trial 1	1.1	S_TWN	F	0:08:10.504-0:08:10.770	IT3	0.00332279	8	0.012448
Trial 1	1.1	S_TWN	F	0:08:10.770-0:08:11.036	IT3	0.00332279	8	0.012448
Trial 1	1.1	S_TWN	F	0:08:11.036-0:08:11.302	IT3	0.00332279	8	0.012448
Trial 1	1.1	S_TWN	F	0:08:11.302-0:08:11.568	IT3	0.00332279	8	0.012448
Trial 1	1.1	S_TWN	F	0:08:11.568-0:08:11.834	IT3	0.00332279	8	0.012448
Trial 1	1.1	S_TWN	F	0:08:11.834-0:08:12.100	IT3	0.00332279	8	0.012448
Trial 1	1.1	S_TWN	F	0:08:12.100-0:08:12.366	IT3	0.00332279	8	0.012448
Trial 1	1.1	S_TWN	F	0:08:12.366-0:08:12.632	IT3	0.00332279	8	0.012448
Trial 1	1.1	S_TWN	F	0:08:12.632-0:08:12.898	IT3	0.00332279	8	0.012448
Trial 1	1.1	S_TWN	F	0:08:12.898-0:08:13.164	IT3	0.00332279	8	0.012448
Trial 1	1.1	S_TWN	F	0:08:13.164-0:08:13.430	IT3	0.00332279	8	0.012448
Trial 1	1.1	S_TWN	F	0:08:13.430-0:08:13.696	IT3	0.00332279	8	0.012448
Trial 1	1.1	S_TWN	F	0:08:13.696-0:08:13.962	IT3	0.00332279	8	0.012448
Trial 1	1.1	S_TWN	F	0:08:13.962-0:08:14.228	IT3	0.00332279	8	0.012448
Trial 1	1.1	S_TWN	F	0:08:14.228-0:08:14.494	IT3	0.00290744	7	0.012448
Trial 1	1.1	S_TWN	F	0:08:14.494-0:08:14.760	IT3	0.00332279	8	0.012448
Trial 1	1.1	S_TWN	F	0:08:14.760-0:08:15.026	IT3	0.00332279	8	0.012448
Trial 1	1.1	S_TWN	F	0:08:15.026-0:08:15.292	IT3	0.00332279	8	0.012448
Trial 1	1.1	S_TWN	F	0:08:15.292-0:08:15.558	IT3	0.00332279	8	0.012448
Trial 1	1.1	S_TWN	F	0:08:15.558-0:08:15.824	IT3	0.00332279	8	0.012448
Trial 1	1.1	S_TWN	F	0:08:15.824-0:08:16.090	IT3	0.00332279	8	0.012448
Trial 1	1.1	S_TWN	F	0:08:16.090-0:08:16.356	IT3	0.00332279	8	0.012448
Trial 1	1.1	S_TWN	F	0:08:16.356-0:08:16.622	IT3	0.00332279	8	0.012448
Trial 1	1.1	S_TWN	F	0:08:16.622-0:08:16.888	IT3	0.00332279	8	0.012448
[truncated: 224,182+ more rows]
