# Supplementary material for: Conditional and unconditional components of aversively motivated freezing, flight and darting in mice
Source: eLife. 2022 May 26;11:e75663. doi: 10.7554/eLife.75663 (PMC9173745; doi:10.7554/eLife.75663)
Supplement: Figure 5—source data 1. [file elife-75663-fig5-data1.xlsx]

## Sheet: Day 3
Raw velocity data, extracted via ethovision, which is fed to R source code 1 to detect and extract darts, and to produce velocity traces
Showing Data from Test Day 3 for all animals in Experiment 2
Used to calculate Darts/minute as seen in Figure 4 and Figure 4-figure supplement 1
Used to produce velocity traces as seen in Figure 5
Trial	Animal	Group	Sex	TimeStamp	StimPeriod	Distance_cm	Samples	Velocity
Trial 1	1.1	S_TWN	F	Start-0:00:00.266	BL	-	0	-
Trial 1	1.1	S_TWN	F	0:00:00.266-0:00:00.532	BL	-	0	-
Trial 1	1.1	S_TWN	F	0:00:00.532-0:00:00.798	BL	-	0	-
Trial 1	1.1	S_TWN	F	0:00:00.798-0:00:01.064	BL	-	0	-
Trial 1	1.1	S_TWN	F	0:00:01.064-0:00:01.330	BL	-	0	-
Trial 1	1.1	S_TWN	F	0:00:01.330-0:00:01.596	BL	-	0	-
Trial 1	1.1	S_TWN	F	0:00:01.596-0:00:01.862	BL	-	0	-
Trial 1	1.1	S_TWN	F	0:00:01.862-0:00:02.128	BL	-	0	-
Trial 1	1.1	S_TWN	F	0:00:02.128-0:00:02.394	BL	-	0	-
Trial 1	1.1	S_TWN	F	0:00:02.394-0:00:02.660	BL	-	0	-
Trial 1	1.1	S_TWN	F	0:00:02.660-0:00:02.926	BL	-	0	-
Trial 1	1.1	S_TWN	F	0:00:02.926-0:00:03.192	BL	-	0	-
Trial 1	1.1	S_TWN	F	0:00:03.192-0:00:03.458	BL	-	0	-
Trial 1	1.1	S_TWN	F	0:00:03.458-0:00:03.724	BL	-	0	-
Trial 1	1.1	S_TWN	F	0:00:03.724-0:00:03.990	BL	-	0	-
Trial 1	1.1	S_TWN	F	0:00:03.990-0:00:04.256	BL	-	0	-
Trial 1	1.1	S_TWN	F	0:00:04.256-0:00:04.522	BL	-	0	-
Trial 1	1.1	S_TWN	F	0:00:04.522-0:00:04.788	BL	-	0	-
Trial 1	1.1	S_TWN	F	0:00:04.788-0:00:05.054	BL	-	0	-
Trial 1	1.1	S_TWN	F	0:00:05.054-0:00:05.320	BL	-	0	-
Trial 1	1.1	S_TWN	F	0:00:05.320-0:00:05.586	BL	-	0	-
Trial 1	1.1	S_TWN	F	0:00:05.586-0:00:05.852	BL	-	0	-
Trial 1	1.1	S_TWN	F	0:00:05.852-0:00:06.118	BL	-	0	-
Trial 1	1.1	S_TWN	F	0:00:06.118-0:00:06.384	BL	-	0	-
Trial 1	1.1	S_TWN	F	0:00:06.384-0:00:06.650	BL	-	0	-
Trial 1	1.1	S_TWN	F	0:00:06.650-0:00:06.916	BL	-	0	-
Trial 1	1.1	S_TWN	F	0:00:06.916-0:00:07.182	BL	-	0	-
Trial 1	1.1	S_TWN	F	0:00:07.182-0:00:07.448	BL	-	0	-
Trial 1	1.1	S_TWN	F	0:00:07.448-0:00:07.714	BL	-	0	-
Trial 1	1.1	S_TWN	F	0:00:07.714-0:00:07.980	BL	-	0	-
Trial 1	1.1	S_TWN	F	0:00:07.980-0:00:08.246	BL	-	0	-
Trial 1	1.1	S_TWN	F	0:00:08.246-0:00:08.512	BL	-	0	-
Trial 1	1.1	S_TWN	F	0:00:08.512-0:00:08.778	BL	-	0	-
Trial 1	1.1	S_TWN	F	0:00:08.778-0:00:09.044	BL	-	0	-
Trial 1	1.1	S_TWN	F	0:00:09.044-0:00:09.310	BL	-	0	-
Trial 1	1.1	S_TWN	F	0:00:09.310-0:00:09.576	BL	-	0	-
Trial 1	1.1	S_TWN	F	0:00:09.576-0:00:09.842	BL	-	0	-
Trial 1	1.1	S_TWN	F	0:00:09.842-0:00:10.108	BL	-	0	-
Trial 1	1.1	S_TWN	F	0:00:10.108-0:00:10.374	BL	-	0	-
Trial 1	1.1	S_TWN	F	0:00:10.374-0:00:10.640	BL	-	0	-
Trial 1	1.1	S_TWN	F	0:00:10.640-0:00:10.906	BL	-	0	-
Trial 1	1.1	S_TWN	F	0:00:10.906-0:00:11.172	BL	-	0	-
Trial 1	1.1	S_TWN	F	0:00:11.172-0:00:11.438	BL	-	0	-
Trial 1	1.1	S_TWN	F	0:00:11.438-0:00:11.704	BL	-	0	-
Trial 1	1.1	S_TWN	F	0:00:11.704-0:00:11.970	BL	-	0	-
Trial 1	1.1	S_TWN	F	0:00:11.970-0:00:12.236	BL	-	0	-
Trial 1	1.1	S_TWN	F	0:00:12.236-0:00:12.502	BL	-	0	-
Trial 1	1.1	S_TWN	F	0:00:12.502-0:00:12.768	BL	-	0	-
Trial 1	1.1	S_TWN	F	0:00:12.768-0:00:13.034	BL	-	0	-
Trial 1	1.1	S_TWN	F	0:00:13.034-0:00:13.300	BL	-	0	-
Trial 1	1.1	S_TWN	F	0:00:13.300-0:00:13.566	BL	-	0	-
Trial 1	1.1	S_TWN	F	0:00:13.566-0:00:13.832	BL	-	0	-
Trial 1	1.1	S_TWN	F	0:00:13.832-0:00:14.098	BL	-	0	-
Trial 1	1.1	S_TWN	F	0:00:14.098-0:00:14.364	BL	-	0	-
Trial 1	1.1	S_TWN	F	0:00:14.364-0:00:14.630	BL	-	0	-
Trial 1	1.1	S_TWN	F	0:00:14.630-0:00:14.896	BL	-	0	-
Trial 1	1.1	S_TWN	F	0:00:14.896-0:00:15.162	BL	-	0	-
Trial 1	1.1	S_TWN	F	0:00:15.162-0:00:15.428	BL	-	0	-
Trial 1	1.1	S_TWN	F	0:00:15.428-0:00:15.694	BL	-	0	-
Trial 1	1.1	S_TWN	F	0:00:15.694-0:00:15.960	BL	-	0	-
Trial 1	1.1	S_TWN	F	0:00:15.960-0:00:16.226	BL	-	0	-
Trial 1	1.1	S_TWN	F	0:00:16.226-0:00:16.492	BL	-	0	-
Trial 1	1.1	S_TWN	F	0:00:16.492-0:00:16.758	BL	-	0	-
Trial 1	1.1	S_TWN	F	0:00:16.758-0:00:17.024	BL	-	0	-
Trial 1	1.1	S_TWN	F	0:00:17.024-0:00:17.290	BL	-	0	-
Trial 1	1.1	S_TWN	F	0:00:17.290-0:00:17.556	BL	-	0	-
Trial 1	1.1	S_TWN	F	0:00:17.556-0:00:17.822	BL	-	0	-
Trial 1	1.1	S_TWN	F	0:00:17.822-0:00:18.088	BL	-	0	-
Trial 1	1.1	S_TWN	F	0:00:18.088-0:00:18.354	BL	-	0	-
Trial 1	1.1	S_TWN	F	0:00:18.354-0:00:18.620	BL	-	0	-
Trial 1	1.1	S_TWN	F	0:00:18.620-0:00:18.886	BL	-	0	-
Trial 1	1.1	S_TWN	F	0:00:18.886-0:00:19.152	BL	-	0	-
Trial 1	1.1	S_TWN	F	0:00:19.152-0:00:19.418	BL	-	0	-
Trial 1	1.1	S_TWN	F	0:00:19.418-0:00:19.684	BL	-	0	-
Trial 1	1.1	S_TWN	F	0:00:19.684-0:00:19.950	BL	-	0	-
Trial 1	1.1	S_TWN	F	0:00:19.950-0:00:20.216	BL	-	0	-
Trial 1	1.1	S_TWN	F	0:00:20.216-0:00:20.482	BL	-	0	-
Trial 1	1.1	S_TWN	F	0:00:20.482-0:00:20.748	BL	-	0	-
Trial 1	1.1	S_TWN	F	0:00:20.748-0:00:21.014	BL	-	0	-
Trial 1	1.1	S_TWN	F	0:00:21.014-0:00:21.280	BL	-	0	-
Trial 1	1.1	S_TWN	F	0:00:21.280-0:00:21.546	BL	-	0	-
Trial 1	1.1	S_TWN	F	0:00:21.546-0:00:21.812	BL	-	0	-
Trial 1	1.1	S_TWN	F	0:00:21.812-0:00:22.078	BL	-	0	-
Trial 1	1.1	S_TWN	F	0:00:22.078-0:00:22.344	BL	-	0	-
Trial 1	1.1	S_TWN	F	0:00:22.344-0:00:22.610	BL	-	0	-
Trial 1	1.1	S_TWN	F	0:00:22.610-0:00:22.876	BL	-	0	-
Trial 1	1.1	S_TWN	F	0:00:22.876-0:00:23.142	BL	-	0	-
Trial 1	1.1	S_TWN	F	0:00:23.142-0:00:23.408	BL	-	0	-
Trial 1	1.1	S_TWN	F	0:00:23.408-0:00:23.674	BL	-	0	-
Trial 1	1.1	S_TWN	F	0:00:23.674-0:00:23.940	BL	-	0	-
Trial 1	1.1	S_TWN	F	0:00:23.940-0:00:24.206	BL	-	0	-
Trial 1	1.1	S_TWN	F	0:00:24.206-0:00:24.472	BL	-	0	-
Trial 1	1.1	S_TWN	F	0:00:24.472-0:00:24.738	BL	-	0	-
Trial 1	1.1	S_TWN	F	0:00:24.738-0:00:25.004	BL	-	0	-
Trial 1	1.1	S_TWN	F	0:00:25.004-0:00:25.270	BL	-	0	-
Trial 1	1.1	S_TWN	F	0:00:25.270-0:00:25.536	BL	-	0	-
Trial 1	1.1	S_TWN	F	0:00:25.536-0:00:25.802	BL	-	0	-
Trial 1	1.1	S_TWN	F	0:00:25.802-0:00:26.068	BL	-	0	-
Trial 1	1.1	S_TWN	F	0:00:26.068-0:00:26.334	BL	-	0	-
Trial 1	1.1	S_TWN	F	0:00:26.334-0:00:26.600	BL	-	0	-
Trial 1	1.1	S_TWN	F	0:00:26.600-0:00:26.866	BL	-	0	-
Trial 1	1.1	S_TWN	F	0:00:26.866-0:00:27.132	BL	-	0	-
Trial 1	1.1	S_TWN	F	0:00:27.132-0:00:27.398	BL	-	0	-
Trial 1	1.1	S_TWN	F	0:00:27.398-0:00:27.664	BL	-	0	-
Trial 1	1.1	S_TWN	F	0:00:27.664-0:00:27.930	BL	-	0	-
Trial 1	1.1	S_TWN	F	0:00:27.930-0:00:28.196	BL	-	0	-
Trial 1	1.1	S_TWN	F	0:00:28.196-0:00:28.462	BL	-	0	-
Trial 1	1.1	S_TWN	F	0:00:28.462-0:00:28.728	BL	-	0	-
Trial 1	1.1	S_TWN	F	0:00:28.728-0:00:28.994	BL	-	0	-
Trial 1	1.1	S_TWN	F	0:00:28.994-0:00:29.260	BL	-	0	-
Trial 1	1.1	S_TWN	F	0:00:29.260-0:00:29.526	BL	-	0	-
Trial 1	1.1	S_TWN	F	0:00:29.526-0:00:29.792	BL	-	0	-
Trial 1	1.1	S_TWN	F	0:00:29.792-0:00:30.058	BL	-	0	-
Trial 1	1.1	S_TWN	F	0:00:30.058-0:00:30.324	BL	-	0	-
Trial 1	1.1	S_TWN	F	0:00:30.324-0:00:30.590	BL	-	0	-
Trial 1	1.1	S_TWN	F	0:00:30.590-0:00:30.856	BL	-	0	-
Trial 1	1.1	S_TWN	F	0:00:30.856-0:00:31.122	BL	-	0	-
Trial 1	1.1	S_TWN	F	0:00:31.122-0:00:31.388	BL	-	0	-
Trial 1	1.1	S_TWN	F	0:00:31.388-0:00:31.654	BL	-	0	-
Trial 1	1.1	S_TWN	F	0:00:31.654-0:00:31.920	BL	-	0	-
Trial 1	1.1	S_TWN	F	0:00:31.920-0:00:32.186	BL	-	0	-
Trial 1	1.1	S_TWN	F	0:00:32.186-0:00:32.452	BL	-	0	-
Trial 1	1.1	S_TWN	F	0:00:32.452-0:00:32.718	BL	-	0	-
Trial 1	1.1	S_TWN	F	0:00:32.718-0:00:32.984	BL	-	0	-
Trial 1	1.1	S_TWN	F	0:00:32.984-0:00:33.250	BL	-	0	-
Trial 1	1.1	S_TWN	F	0:00:33.250-0:00:33.516	BL	-	0	-
Trial 1	1.1	S_TWN	F	0:00:33.516-0:00:33.782	BL	-	0	-
Trial 1	1.1	S_TWN	F	0:00:33.782-0:00:34.048	BL	-	0	-
Trial 1	1.1	S_TWN	F	0:00:34.048-0:00:34.314	BL	-	0	-
Trial 1	1.1	S_TWN	F	0:00:34.314-0:00:34.580	BL	-	0	-
Trial 1	1.1	S_TWN	F	0:00:34.580-0:00:34.846	BL	-	0	-
Trial 1	1.1	S_TWN	F	0:00:34.846-0:00:35.112	BL	-	0	-
Trial 1	1.1	S_TWN	F	0:00:35.112-0:00:35.378	BL	-	0	-
Trial 1	1.1	S_TWN	F	0:00:35.378-0:00:35.644	BL	-	0	-
Trial 1	1.1	S_TWN	F	0:00:35.644-0:00:35.910	BL	-	0	-
Trial 1	1.1	S_TWN	F	0:00:35.910-0:00:36.176	BL	-	0	-
Trial 1	1.1	S_TWN	F	0:00:36.176-0:00:36.442	BL	-	0	-
Trial 1	1.1	S_TWN	F	0:00:36.442-0:00:36.708	BL	-	0	-
Trial 1	1.1	S_TWN	F	0:00:36.708-0:00:36.974	BL	-	0	-
Trial 1	1.1	S_TWN	F	0:00:36.974-0:00:37.240	BL	-	0	-
Trial 1	1.1	S_TWN	F	0:00:37.240-0:00:37.506	BL	-	0	-
Trial 1	1.1	S_TWN	F	0:00:37.506-0:00:37.772	BL	-	0	-
Trial 1	1.1	S_TWN	F	0:00:37.772-0:00:38.038	BL	-	0	-
Trial 1	1.1	S_TWN	F	0:00:38.038-0:00:38.304	BL	-	0	-
Trial 1	1.1	S_TWN	F	0:00:38.304-0:00:38.570	BL	-	0	-
Trial 1	1.1	S_TWN	F	0:00:38.570-0:00:38.836	BL	-	0	-
Trial 1	1.1	S_TWN	F	0:00:38.836-0:00:39.102	BL	-	0	-
Trial 1	1.1	S_TWN	F	0:00:39.102-0:00:39.368	BL	-	0	-
Trial 1	1.1	S_TWN	F	0:00:39.368-0:00:39.634	BL	-	0	-
Trial 1	1.1	S_TWN	F	0:00:39.634-0:00:39.900	BL	-	0	-
Trial 1	1.1	S_TWN	F	0:00:39.900-0:00:40.166	BL	-	0	-
Trial 1	1.1	S_TWN	F	0:00:40.166-0:00:40.432	BL	-	0	-
Trial 1	1.1	S_TWN	F	0:00:40.432-0:00:40.698	BL	-	0	-
Trial 1	1.1	S_TWN	F	0:00:40.698-0:00:40.964	BL	-	0	-
Trial 1	1.1	S_TWN	F	0:00:40.964-0:00:41.230	BL	-	0	-
Trial 1	1.1	S_TWN	F	0:00:41.230-0:00:41.496	BL	-	0	-
Trial 1	1.1	S_TWN	F	0:00:41.496-0:00:41.762	BL	-	0	-
Trial 1	1.1	S_TWN	F	0:00:41.762-0:00:42.028	BL	-	0	-
Trial 1	1.1	S_TWN	F	0:00:42.028-0:00:42.294	BL	-	0	-
Trial 1	1.1	S_TWN	F	0:00:42.294-0:00:42.560	BL	-	0	-
Trial 1	1.1	S_TWN	F	0:00:42.560-0:00:42.826	BL	-	0	-
Trial 1	1.1	S_TWN	F	0:00:42.826-0:00:43.092	BL	-	0	-
Trial 1	1.1	S_TWN	F	0:00:43.092-0:00:43.358	BL	-	0	-
Trial 1	1.1	S_TWN	F	0:00:43.358-0:00:43.624	BL	-	0	-
Trial 1	1.1	S_TWN	F	0:00:43.624-0:00:43.890	BL	-	0	-
Trial 1	1.1	S_TWN	F	0:00:43.890-0:00:44.156	BL	-	0	-
Trial 1	1.1	S_TWN	F	0:00:44.156-0:00:44.422	BL	-	0	-
Trial 1	1.1	S_TWN	F	0:00:44.422-0:00:44.688	BL	-	0	-
Trial 1	1.1	S_TWN	F	0:00:44.688-0:00:44.954	BL	-	0	-
Trial 1	1.1	S_TWN	F	0:00:44.954-0:00:45.220	BL	-	0	-
Trial 1	1.1	S_TWN	F	0:00:45.220-0:00:45.486	BL	-	0	-
Trial 1	1.1	S_TWN	F	0:00:45.486-0:00:45.752	BL	-	0	-
Trial 1	1.1	S_TWN	F	0:00:45.752-0:00:46.018	BL	-	0	-
Trial 1	1.1	S_TWN	F	0:00:46.018-0:00:46.284	BL	-	0	-
Trial 1	1.1	S_TWN	F	0:00:46.284-0:00:46.550	BL	-	0	-
Trial 1	1.1	S_TWN	F	0:00:46.550-0:00:46.816	BL	-	0	-
Trial 1	1.1	S_TWN	F	0:00:46.816-0:00:47.082	BL	-	0	-
Trial 1	1.1	S_TWN	F	0:00:47.082-0:00:47.348	BL	-	0	-
Trial 1	1.1	S_TWN	F	0:00:47.348-0:00:47.614	BL	-	0	-
Trial 1	1.1	S_TWN	F	0:00:47.614-0:00:47.880	BL	-	0	-
Trial 1	1.1	S_TWN	F	0:00:47.880-0:00:48.146	BL	-	0	-
Trial 1	1.1	S_TWN	F	0:00:48.146-0:00:48.412	BL	-	0	-
Trial 1	1.1	S_TWN	F	0:00:48.412-0:00:48.678	BL	-	0	-
Trial 1	1.1	S_TWN	F	0:00:48.678-0:00:48.944	BL	-	0	-
Trial 1	1.1	S_TWN	F	0:00:48.944-0:00:49.210	BL	-	0	-
Trial 1	1.1	S_TWN	F	0:00:49.210-0:00:49.476	BL	-	0	-
Trial 1	1.1	S_TWN	F	0:00:49.476-0:00:49.742	BL	-	0	-
Trial 1	1.1	S_TWN	F	0:00:49.742-0:00:50.008	BL	-	0	-
Trial 1	1.1	S_TWN	F	0:00:50.008-0:00:50.274	BL	-	0	-
Trial 1	1.1	S_TWN	F	0:00:50.274-0:00:50.540	BL	-	0	-
Trial 1	1.1	S_TWN	F	0:00:50.540-0:00:50.806	BL	-	0	-
Trial 1	1.1	S_TWN	F	0:00:50.806-0:00:51.072	BL	-	0	-
Trial 1	1.1	S_TWN	F	0:00:51.072-0:00:51.338	BL	-	0	-
Trial 1	1.1	S_TWN	F	0:00:51.338-0:00:51.604	BL	-	0	-
Trial 1	1.1	S_TWN	F	0:00:51.604-0:00:51.870	BL	-	0	-
Trial 1	1.1	S_TWN	F	0:00:51.870-0:00:52.136	BL	-	0	-
Trial 1	1.1	S_TWN	F	0:00:52.136-0:00:52.402	BL	-	0	-
Trial 1	1.1	S_TWN	F	0:00:52.402-0:00:52.668	BL	-	0	-
Trial 1	1.1	S_TWN	F	0:00:52.668-0:00:52.934	BL	-	0	-
Trial 1	1.1	S_TWN	F	0:00:52.934-0:00:53.200	BL	-	0	-
Trial 1	1.1	S_TWN	F	0:00:53.200-0:00:53.466	BL	-	0	-
Trial 1	1.1	S_TWN	F	0:00:53.466-0:00:53.732	BL	-	0	-
Trial 1	1.1	S_TWN	F	0:00:53.732-0:00:53.998	BL	-	0	-
Trial 1	1.1	S_TWN	F	0:00:53.998-0:00:54.264	BL	-	0	-
Trial 1	1.1	S_TWN	F	0:00:54.264-0:00:54.530	BL	-	0	-
Trial 1	1.1	S_TWN	F	0:00:54.530-0:00:54.796	BL	-	0	-
Trial 1	1.1	S_TWN	F	0:00:54.796-0:00:55.062	BL	-	0	-
Trial 1	1.1	S_TWN	F	0:00:55.062-0:00:55.328	BL	-	0	-
Trial 1	1.1	S_TWN	F	0:00:55.328-0:00:55.594	BL	-	0	-
Trial 1	1.1	S_TWN	F	0:00:55.594-0:00:55.860	BL	-	0	-
Trial 1	1.1	S_TWN	F	0:00:55.860-0:00:56.126	BL	-	0	-
Trial 1	1.1	S_TWN	F	0:00:56.126-0:00:56.392	BL	-	0	-
Trial 1	1.1	S_TWN	F	0:00:56.392-0:00:56.658	BL	-	0	-
Trial 1	1.1	S_TWN	F	0:00:56.658-0:00:56.924	BL	-	0	-
Trial 1	1.1	S_TWN	F	0:00:56.924-0:00:57.190	BL	-	0	-
Trial 1	1.1	S_TWN	F	0:00:57.190-0:00:57.456	BL	-	0	-
Trial 1	1.1	S_TWN	F	0:00:57.456-0:00:57.722	BL	-	0	-
Trial 1	1.1	S_TWN	F	0:00:57.722-0:00:57.988	BL	-	0	-
Trial 1	1.1	S_TWN	F	0:00:57.988-0:00:58.254	BL	-	0	-
Trial 1	1.1	S_TWN	F	0:00:58.254-0:00:58.520	BL	-	0	-
Trial 1	1.1	S_TWN	F	0:00:58.520-0:00:58.786	BL	1.03964	6	5.19299
Trial 1	1.1	S_TWN	F	0:00:58.786-0:00:59.052	BL	0.697981	8	2.61481
Trial 1	1.1	S_TWN	F	0:00:59.052-0:00:59.318	BL	0.128432	8	0.481137
Trial 1	1.1	S_TWN	F	0:00:59.318-0:00:59.584	BL	0.27366	8	1.0252
Trial 1	1.1	S_TWN	F	0:00:59.584-0:00:59.850	BL	0.23737	8	0.889246
Trial 1	1.1	S_TWN	F	0:00:59.850-0:01:00.116	BL	0.238969	8	0.89524
Trial 1	1.1	S_TWN	F	0:01:00.116-0:01:00.382	BL	0.0813603	8	0.304795
Trial 1	1.1	S_TWN	F	0:01:00.382-0:01:00.648	BL	0.235416	8	0.881924
Trial 1	1.1	S_TWN	F	0:01:00.648-0:01:00.914	BL	0.0663391	8	0.248522
Trial 1	1.1	S_TWN	F	0:01:00.914-0:01:01.180	BL	0.0534893	8	0.200384
Trial 1	1.1	S_TWN	F	0:01:01.180-0:01:01.446	BL	0.190986	8	0.715481
Trial 1	1.1	S_TWN	F	0:01:01.446-0:01:01.712	BL	0.0850817	8	0.318736
Trial 1	1.1	S_TWN	F	0:01:01.712-0:01:01.978	BL	0.0703941	8	0.263715
Trial 1	1.1	S_TWN	F	0:01:01.978-0:01:02.244	BL	0.122049	8	0.457226
Trial 1	1.1	S_TWN	F	0:01:02.244-0:01:02.510	BL	0.120138	8	0.450067
Trial 1	1.1	S_TWN	F	0:01:02.510-0:01:02.776	BL	0.158401	8	0.593413
Trial 1	1.1	S_TWN	F	0:01:02.776-0:01:03.042	BL	0.0999994	8	0.374621
Trial 1	1.1	S_TWN	F	0:01:03.042-0:01:03.308	BL	0.148513	8	0.556368
Trial 1	1.1	S_TWN	F	0:01:03.308-0:01:03.574	BL	0.131906	8	0.494154
Trial 1	1.1	S_TWN	F	0:01:03.574-0:01:03.840	BL	0.210815	8	0.789762
Trial 1	1.1	S_TWN	F	0:01:03.840-0:01:04.106	BL	0.219614	8	0.822726
Trial 1	1.1	S_TWN	F	0:01:04.106-0:01:04.372	BL	0.174807	8	0.654867
Trial 1	1.1	S_TWN	F	0:01:04.372-0:01:04.638	BL	0.0742281	8	0.278077
Trial 1	1.1	S_TWN	F	0:01:04.638-0:01:04.904	BL	0.150992	8	0.565657
Trial 1	1.1	S_TWN	F	0:01:04.904-0:01:05.170	BL	0.0691973	8	0.25923
Trial 1	1.1	S_TWN	F	0:01:05.170-0:01:05.436	BL	0.0916718	8	0.343428
Trial 1	1.1	S_TWN	F	0:01:05.436-0:01:05.702	BL	0.397834	8	1.49039
Trial 1	1.1	S_TWN	F	0:01:05.702-0:01:05.968	BL	0.206155	8	0.772313
Trial 1	1.1	S_TWN	F	0:01:05.968-0:01:06.234	BL	0.160263	8	0.600387
Trial 1	1.1	S_TWN	F	0:01:06.234-0:01:06.500	BL	0.188556	8	0.706378
Trial 1	1.1	S_TWN	F	0:01:06.500-0:01:06.766	BL	0.132198	7	0.565993
Trial 1	1.1	S_TWN	F	0:01:06.766-0:01:07.032	BL	0.139449	8	0.522411
Trial 1	1.1	S_TWN	F	0:01:07.032-0:01:07.298	BL	0.194563	8	0.728878
Trial 1	1.1	S_TWN	F	0:01:07.298-0:01:07.564	BL	0.239663	8	0.897836
Trial 1	1.1	S_TWN	F	0:01:07.564-0:01:07.830	BL	0.111423	8	0.417419
Trial 1	1.1	S_TWN	F	0:01:07.830-0:01:08.096	BL	0.168439	8	0.631013
Trial 1	1.1	S_TWN	F	0:01:08.096-0:01:08.362	BL	0.124204	8	0.465299
Trial 1	1.1	S_TWN	F	0:01:08.362-0:01:08.628	BL	0.185529	8	0.695044
Trial 1	1.1	S_TWN	F	0:01:08.628-0:01:08.894	BL	0.20709	8	0.775814
Trial 1	1.1	S_TWN	F	0:01:08.894-0:01:09.160	BL	0.181562	8	0.680177
Trial 1	1.1	S_TWN	F	0:01:09.160-0:01:09.426	BL	0.142469	8	0.533723
Trial 1	1.1	S_TWN	F	0:01:09.426-0:01:09.692	BL	0.0900568	8	0.337377
Trial 1	1.1	S_TWN	F	0:01:09.692-0:01:09.958	BL	0.107833	8	0.403967
Trial 1	1.1	S_TWN	F	0:01:09.958-0:01:10.224	BL	0.0900539	8	0.337364
Trial 1	1.1	S_TWN	F	0:01:10.224-0:01:10.490	BL	0.086264	8	0.323166
Trial 1	1.1	S_TWN	F	0:01:10.490-0:01:10.756	BL	0.0863594	8	0.323522
Trial 1	1.1	S_TWN	F	0:01:10.756-0:01:11.022	BL	0.185412	8	0.694602
Trial 1	1.1	S_TWN	F	0:01:11.022-0:01:11.288	BL	0.0921982	8	0.345398
Trial 1	1.1	S_TWN	F	0:01:11.288-0:01:11.554	BL	0.125961	8	0.471885
Trial 1	1.1	S_TWN	F	0:01:11.554-0:01:11.820	BL	0.0782042	8	0.292971
Trial 1	1.1	S_TWN	F	0:01:11.820-0:01:12.086	BL	0.0430056	8	0.161109
Trial 1	1.1	S_TWN	F	0:01:12.086-0:01:12.352	BL	0.062851	8	0.235456
Trial 1	1.1	S_TWN	F	0:01:12.352-0:01:12.618	BL	0.0239002	8	0.0895361
Trial 1	1.1	S_TWN	F	0:01:12.618-0:01:12.884	BL	0.0885977	8	0.331909
Trial 1	1.1	S_TWN	F	0:01:12.884-0:01:13.150	BL	0.0371729	8	0.139259
Trial 1	1.1	S_TWN	F	0:01:13.150-0:01:13.416	BL	0.0930836	8	0.348716
Trial 1	1.1	S_TWN	F	0:01:13.416-0:01:13.682	BL	0.0581845	8	0.217975
Trial 1	1.1	S_TWN	F	0:01:13.682-0:01:13.948	BL	0.132367	8	0.495882
Trial 1	1.1	S_TWN	F	0:01:13.948-0:01:14.214	BL	0.0430854	8	0.161409
Trial 1	1.1	S_TWN	F	0:01:14.214-0:01:14.480	BL	0.113074	8	0.423601
Trial 1	1.1	S_TWN	F	0:01:14.480-0:01:14.746	BL	0.0710407	8	0.266138
Trial 1	1.1	S_TWN	F	0:01:14.746-0:01:15.012	BL	0.0310651	8	0.116378
Trial 1	1.1	S_TWN	F	0:01:15.012-0:01:15.278	BL	0.0746203	8	0.279547
Trial 1	1.1	S_TWN	F	0:01:15.278-0:01:15.544	BL	0.0529318	8	0.198297
Trial 1	1.1	S_TWN	F	0:01:15.544-0:01:15.810	BL	0.153214	8	0.573974
Trial 1	1.1	S_TWN	F	0:01:15.810-0:01:16.076	BL	0.0422163	7	0.180746
Trial 1	1.1	S_TWN	F	0:01:16.076-0:01:16.342	BL	0.0412317	8	0.154465
Trial 1	1.1	S_TWN	F	0:01:16.342-0:01:16.608	BL	0.044667	8	0.167334
Trial 1	1.1	S_TWN	F	0:01:16.608-0:01:16.874	BL	0.0219898	8	0.082379
Trial 1	1.1	S_TWN	F	0:01:16.874-0:01:17.140	BL	0.145263	8	0.544194
Trial 1	1.1	S_TWN	F	0:01:17.140-0:01:17.406	BL	0.0454386	8	0.170224
Trial 1	1.1	S_TWN	F	0:01:17.406-0:01:17.672	BL	0.125532	8	0.470275
Trial 1	1.1	S_TWN	F	0:01:17.672-0:01:17.938	BL	0.063275	8	0.237044
Trial 1	1.1	S_TWN	F	0:01:17.938-0:01:18.204	BL	0.0699534	8	0.262062
Trial 1	1.1	S_TWN	F	0:01:18.204-0:01:18.470	BL	0.0711558	8	0.26657
Trial 1	1.1	S_TWN	F	0:01:18.470-0:01:18.736	BL	0.0684403	8	0.256394
Trial 1	1.1	S_TWN	F	0:01:18.736-0:01:19.002	BL	0.0899435	8	0.33695
Trial 1	1.1	S_TWN	F	0:01:19.002-0:01:19.268	BL	0.249458	8	0.934532
Trial 1	1.1	S_TWN	F	0:01:19.268-0:01:19.534	BL	0.258892	8	0.969869
Trial 1	1.1	S_TWN	F	0:01:19.534-0:01:19.800	BL	0.135628	8	0.508098
Trial 1	1.1	S_TWN	F	0:01:19.800-0:01:20.066	BL	0.110188	8	0.412794
Trial 1	1.1	S_TWN	F	0:01:20.066-0:01:20.332	BL	0.0816174	8	0.305761
Trial 1	1.1	S_TWN	F	0:01:20.332-0:01:20.598	BL	0.138053	8	0.51718
Trial 1	1.1	S_TWN	F	0:01:20.598-0:01:20.864	BL	0.0371956	8	0.139343
Trial 1	1.1	S_TWN	F	0:01:20.864-0:01:21.130	BL	0.0615057	8	0.230417
Trial 1	1.1	S_TWN	F	0:01:21.130-0:01:21.396	BL	0.0684479	8	0.256422
Trial 1	1.1	S_TWN	F	0:01:21.396-0:01:21.662	BL	0.0871843	8	0.326613
Trial 1	1.1	S_TWN	F	0:01:21.662-0:01:21.928	BL	0.10414	8	0.390131
Trial 1	1.1	S_TWN	F	0:01:21.928-0:01:22.194	BL	0.0522134	8	0.195604
Trial 1	1.1	S_TWN	F	0:01:22.194-0:01:22.460	BL	0.129681	8	0.485817
Trial 1	1.1	S_TWN	F	0:01:22.460-0:01:22.726	BL	0.0327164	8	0.122563
Trial 1	1.1	S_TWN	F	0:01:22.726-0:01:22.992	BL	0.136266	8	0.510491
Trial 1	1.1	S_TWN	F	0:01:22.992-0:01:23.258	BL	0.114369	8	0.428454
Trial 1	1.1	S_TWN	F	0:01:23.258-0:01:23.524	BL	0.115347	8	0.432114
Trial 1	1.1	S_TWN	F	0:01:23.524-0:01:23.790	BL	0.156057	8	0.584633
Trial 1	1.1	S_TWN	F	0:01:23.790-0:01:24.056	BL	0.0752246	8	0.28181
Trial 1	1.1	S_TWN	F	0:01:24.056-0:01:24.322	BL	0.129373	8	0.484666
Trial 1	1.1	S_TWN	F	0:01:24.322-0:01:24.588	BL	0.0812322	8	0.304315
Trial 1	1.1	S_TWN	F	0:01:24.588-0:01:24.854	BL	0.138524	8	0.518943
Trial 1	1.1	S_TWN	F	0:01:24.854-0:01:25.120	BL	0.0382987	8	0.143477
Trial 1	1.1	S_TWN	F	0:01:25.120-0:01:25.386	BL	0.0763261	8	0.285936
Trial 1	1.1	S_TWN	F	0:01:25.386-0:01:25.652	BL	0.0448902	7	0.192194
Trial 1	1.1	S_TWN	F	0:01:25.652-0:01:25.918	BL	0.0385869	8	0.144558
Trial 1	1.1	S_TWN	F	0:01:25.918-0:01:26.184	BL	0.115308	8	0.431971
Trial 1	1.1	S_TWN	F	0:01:26.184-0:01:26.450	BL	0.076623	8	0.287047
Trial 1	1.1	S_TWN	F	0:01:26.450-0:01:26.716	BL	0.0904539	8	0.338862
Trial 1	1.1	S_TWN	F	0:01:26.716-0:01:26.982	BL	0.0940776	8	0.352438
Trial 1	1.1	S_TWN	F	0:01:26.982-0:01:27.248	BL	0.15449	8	0.578756
Trial 1	1.1	S_TWN	F	0:01:27.248-0:01:27.514	BL	0.0253783	8	0.095073
Trial 1	1.1	S_TWN	F	0:01:27.514-0:01:27.780	BL	0.0700673	8	0.262487
Trial 1	1.1	S_TWN	F	0:01:27.780-0:01:28.046	BL	0.0568233	8	0.212874
Trial 1	1.1	S_TWN	F	0:01:28.046-0:01:28.312	BL	0.207624	8	0.777808
Trial 1	1.1	S_TWN	F	0:01:28.312-0:01:28.578	BL	0.156621	8	0.586743
Trial 1	1.1	S_TWN	F	0:01:28.578-0:01:28.844	BL	0.0854474	8	0.320106
Trial 1	1.1	S_TWN	F	0:01:28.844-0:01:29.110	BL	0.102905	8	0.385509
Trial 1	1.1	S_TWN	F	0:01:29.110-0:01:29.376	BL	0.0647049	8	0.242403
Trial 1	1.1	S_TWN	F	0:01:29.376-0:01:29.642	BL	0.208712	8	0.78189
Trial 1	1.1	S_TWN	F	0:01:29.642-0:01:29.908	BL	0.0576056	8	0.215806
Trial 1	1.1	S_TWN	F	0:01:29.908-0:01:30.174	BL	0.148337	8	0.555705
Trial 1	1.1	S_TWN	F	0:01:30.174-0:01:30.440	BL	0.0782865	8	0.29328
Trial 1	1.1	S_TWN	F	0:01:30.440-0:01:30.706	BL	0.0962382	8	0.360532
Trial 1	1.1	S_TWN	F	0:01:30.706-0:01:30.972	BL	0.091323	8	0.342117
Trial 1	1.1	S_TWN	F	0:01:30.972-0:01:31.238	BL	0.0455437	8	0.170618
Trial 1	1.1	S_TWN	F	0:01:31.238-0:01:31.504	BL	0.148694	8	0.55704
Trial 1	1.1	S_TWN	F	0:01:31.504-0:01:31.770	BL	0.475957	8	1.78305
Trial 1	1.1	S_TWN	F	0:01:31.770-0:01:32.036	BL	0.251824	8	0.943402
Trial 1	1.1	S_TWN	F	0:01:32.036-0:01:32.302	BL	0.134862	8	0.505226
Trial 1	1.1	S_TWN	F	0:01:32.302-0:01:32.568	BL	0.163805	8	0.613659
Trial 1	1.1	S_TWN	F	0:01:32.568-0:01:32.834	BL	0.124826	8	0.467629
Trial 1	1.1	S_TWN	F	0:01:32.834-0:01:33.100	BL	0.276269	8	1.03497
Trial 1	1.1	S_TWN	F	0:01:33.100-0:01:33.366	BL	0.113059	8	0.423547
Trial 1	1.1	S_TWN	F	0:01:33.366-0:01:33.632	BL	0.31731	8	1.18872
Trial 1	1.1	S_TWN	F	0:01:33.632-0:01:33.898	BL	0.226238	8	0.84755
Trial 1	1.1	S_TWN	F	0:01:33.898-0:01:34.164	BL	0.10108	8	0.378671
Trial 1	1.1	S_TWN	F	0:01:34.164-0:01:34.430	BL	0.108964	8	0.408207
Trial 1	1.1	S_TWN	F	0:01:34.430-0:01:34.696	BL	0.165794	8	0.621107
Trial 1	1.1	S_TWN	F	0:01:34.696-0:01:34.962	BL	0.12211	8	0.457453
Trial 1	1.1	S_TWN	F	0:01:34.962-0:01:35.228	BL	0.0838111	7	0.358832
Trial 1	1.1	S_TWN	F	0:01:35.228-0:01:35.494	BL	0.0886691	8	0.332179
Trial 1	1.1	S_TWN	F	0:01:35.494-0:01:35.760	BL	0.143234	8	0.536591
Trial 1	1.1	S_TWN	F	0:01:35.760-0:01:36.026	BL	0.0916788	8	0.343454
Trial 1	1.1	S_TWN	F	0:01:36.026-0:01:36.292	BL	0.0767809	8	0.28764
Trial 1	1.1	S_TWN	F	0:01:36.292-0:01:36.558	BL	0.0332784	8	0.124669
Trial 1	1.1	S_TWN	F	0:01:36.558-0:01:36.824	BL	0.0464749	8	0.174106
Trial 1	1.1	S_TWN	F	0:01:36.824-0:01:37.090	BL	0.0352156	8	0.131926
Trial 1	1.1	S_TWN	F	0:01:37.090-0:01:37.356	BL	0.051185	8	0.191752
Trial 1	1.1	S_TWN	F	0:01:37.356-0:01:37.622	BL	0.0840423	8	0.314843
Trial 1	1.1	S_TWN	F	0:01:37.622-0:01:37.888	BL	0.0907698	8	0.340047
Trial 1	1.1	S_TWN	F	0:01:37.888-0:01:38.154	BL	0.150024	8	0.562029
Trial 1	1.1	S_TWN	F	0:01:38.154-0:01:38.420	BL	0.058193	8	0.218006
Trial 1	1.1	S_TWN	F	0:01:38.420-0:01:38.686	BL	0.0800748	8	0.29998
Trial 1	1.1	S_TWN	F	0:01:38.686-0:01:38.952	BL	0.0346322	8	0.12974
Trial 1	1.1	S_TWN	F	0:01:38.952-0:01:39.218	BL	0.0870032	8	0.325934
Trial 1	1.1	S_TWN	F	0:01:39.218-0:01:39.484	BL	0.073151	8	0.274044
Trial 1	1.1	S_TWN	F	0:01:39.484-0:01:39.750	BL	0.100573	8	0.376771
Trial 1	1.1	S_TWN	F	0:01:39.750-0:01:40.016	BL	0.0967544	8	0.362465
Trial 1	1.1	S_TWN	F	0:01:40.016-0:01:40.282	BL	0.0504661	8	0.189057
Trial 1	1.1	S_TWN	F	0:01:40.282-0:01:40.548	BL	0.133552	8	0.500315
Trial 1	1.1	S_TWN	F	0:01:40.548-0:01:40.814	BL	0.0134298	8	0.0503112
Trial 1	1.1	S_TWN	F	0:01:40.814-0:01:41.080	BL	0.0738762	8	0.276758
Trial 1	1.1	S_TWN	F	0:01:41.080-0:01:41.346	BL	0.0463334	8	0.173576
Trial 1	1.1	S_TWN	F	0:01:41.346-0:01:41.612	BL	0.0930121	8	0.348445
Trial 1	1.1	S_TWN	F	0:01:41.612-0:01:41.878	BL	0.403256	8	1.5107
Trial 1	1.1	S_TWN	F	0:01:41.878-0:01:42.144	BL	0.218783	8	0.819618
Trial 1	1.1	S_TWN	F	0:01:42.144-0:01:42.410	BL	0.0738729	8	0.276746
Trial 1	1.1	S_TWN	F	0:01:42.410-0:01:42.676	BL	0.0280393	8	0.105043
Trial 1	1.1	S_TWN	F	0:01:42.676-0:01:42.942	BL	0.124571	8	0.466671
Trial 1	1.1	S_TWN	F	0:01:42.942-0:01:43.208	BL	0.0355969	8	0.133355
Trial 1	1.1	S_TWN	F	0:01:43.208-0:01:43.474	BL	0.0547376	8	0.20506
Trial 1	1.1	S_TWN	F	0:01:43.474-0:01:43.740	BL	0.0623988	8	0.233761
Trial 1	1.1	S_TWN	F	0:01:43.740-0:01:44.006	BL	0.0531829	8	0.199238
Trial 1	1.1	S_TWN	F	0:01:44.006-0:01:44.272	BL	0.0939706	8	0.352036
Trial 1	1.1	S_TWN	F	0:01:44.272-0:01:44.538	BL	0.0509273	8	0.190786
Trial 1	1.1	S_TWN	F	0:01:44.538-0:01:44.804	BL	0.0317299	7	0.135849
Trial 1	1.1	S_TWN	F	0:01:44.804-0:01:45.070	BL	0.0252199	8	0.09448
Trial 1	1.1	S_TWN	F	0:01:45.070-0:01:45.336	BL	0.10618	8	0.397781
Trial 1	1.1	S_TWN	F	0:01:45.336-0:01:45.602	BL	0.055897	8	0.209406
Trial 1	1.1	S_TWN	F	0:01:45.602-0:01:45.868	BL	0.0965867	8	0.361837
Trial 1	1.1	S_TWN	F	0:01:45.868-0:01:46.134	BL	0.117279	8	0.439353
Trial 1	1.1	S_TWN	F	0:01:46.134-0:01:46.400	BL	0.0783635	8	0.293569
Trial 1	1.1	S_TWN	F	0:01:46.400-0:01:46.666	BL	0.0407465	8	0.152647
Trial 1	1.1	S_TWN	F	0:01:46.666-0:01:46.932	BL	0.0502534	8	0.188264
Trial 1	1.1	S_TWN	F	0:01:46.932-0:01:47.198	BL	0.0524594	8	0.196525
Trial 1	1.1	S_TWN	F	0:01:47.198-0:01:47.464	BL	0.0537723	8	0.201444
Trial 1	1.1	S_TWN	F	0:01:47.464-0:01:47.730	BL	0.0951871	8	0.356595
Trial 1	1.1	S_TWN	F	0:01:47.730-0:01:47.996	BL	0.0526124	8	0.197098
Trial 1	1.1	S_TWN	F	0:01:47.996-0:01:48.262	BL	0.0774467	8	0.290134
Trial 1	1.1	S_TWN	F	0:01:48.262-0:01:48.528	BL	0.0476962	8	0.178681
Trial 1	1.1	S_TWN	F	0:01:48.528-0:01:48.794	BL	0.06355	8	0.238073
Trial 1	1.1	S_TWN	F	0:01:48.794-0:01:49.060	BL	0.0478891	8	0.179405
Trial 1	1.1	S_TWN	F	0:01:49.060-0:01:49.326	BL	0.0212237	8	0.0795087
Trial 1	1.1	S_TWN	F	0:01:49.326-0:01:49.592	BL	0.0661832	8	0.247938
Trial 1	1.1	S_TWN	F	0:01:49.592-0:01:49.858	BL	0.0397006	8	0.148728
Trial 1	1.1	S_TWN	F	0:01:49.858-0:01:50.124	BL	0.0726327	8	0.272102
Trial 1	1.1	S_TWN	F	0:01:50.124-0:01:50.390	BL	0.0295255	8	0.110611
Trial 1	1.1	S_TWN	F	0:01:50.390-0:01:50.656	BL	0.0989328	8	0.370626
Trial 1	1.1	S_TWN	F	0:01:50.656-0:01:50.922	BL	0.0412291	8	0.154455
Trial 1	1.1	S_TWN	F	0:01:50.922-0:01:51.188	BL	0.0315465	8	0.118181
Trial 1	1.1	S_TWN	F	0:01:51.188-0:01:51.454	BL	0.026151	8	0.0979678
Trial 1	1.1	S_TWN	F	0:01:51.454-0:01:51.720	BL	0.0369451	8	0.138407
Trial 1	1.1	S_TWN	F	0:01:51.720-0:01:51.986	BL	0.039939	8	0.149621
Trial 1	1.1	S_TWN	F	0:01:51.986-0:01:52.252	BL	0.0561155	8	0.210222
Trial 1	1.1	S_TWN	F	0:01:52.252-0:01:52.518	BL	0.0672124	8	0.251793
Trial 1	1.1	S_TWN	F	0:01:52.518-0:01:52.784	BL	0.01921	8	0.0719658
Trial 1	1.1	S_TWN	F	0:01:52.784-0:01:53.050	BL	0.051806	8	0.194079
Trial 1	1.1	S_TWN	F	0:01:53.050-0:01:53.316	BL	0.0422403	8	0.158243
Trial 1	1.1	S_TWN	F	0:01:53.316-0:01:53.582	BL	0.0863123	8	0.323348
Trial 1	1.1	S_TWN	F	0:01:53.582-0:01:53.848	BL	0.0289699	8	0.108528
Trial 1	1.1	S_TWN	F	0:01:53.848-0:01:54.114	BL	0.0203355	7	0.0870645
Trial 1	1.1	S_TWN	F	0:01:54.114-0:01:54.380	BL	0.0644333	8	0.241384
Trial 1	1.1	S_TWN	F	0:01:54.380-0:01:54.646	BL	0.0230106	8	0.0862029
Trial 1	1.1	S_TWN	F	0:01:54.646-0:01:54.912	BL	0.057525	8	0.215502
Trial 1	1.1	S_TWN	F	0:01:54.912-0:01:55.178	BL	0.0477715	8	0.178965
Trial 1	1.1	S_TWN	F	0:01:55.178-0:01:55.444	BL	0.0864702	8	0.32394
Trial 1	1.1	S_TWN	F	0:01:55.444-0:01:55.710	BL	0.0638912	8	0.239353
Trial 1	1.1	S_TWN	F	0:01:55.710-0:01:55.976	BL	0.0859637	8	0.322042
Trial 1	1.1	S_TWN	F	0:01:55.976-0:01:56.242	BL	0.108517	8	0.406534
Trial 1	1.1	S_TWN	F	0:01:56.242-0:01:56.508	BL	0.0402583	8	0.150819
Trial 1	1.1	S_TWN	F	0:01:56.508-0:01:56.774	BL	0.107624	8	0.403189
Trial 1	1.1	S_TWN	F	0:01:56.774-0:01:57.040	BL	0.0145064	8	0.0543449
Trial 1	1.1	S_TWN	F	0:01:57.040-0:01:57.306	BL	0.0580676	8	0.217535
Trial 1	1.1	S_TWN	F	0:01:57.306-0:01:57.572	BL	0.0394853	8	0.147921
Trial 1	1.1	S_TWN	F	0:01:57.572-0:01:57.838	BL	0.0399529	8	0.149673
Trial 1	1.1	S_TWN	F	0:01:57.838-0:01:58.104	BL	0.0335176	8	0.125565
Trial 1	1.1	S_TWN	F	0:01:58.104-0:01:58.370	BL	0.0602575	8	0.225739
Trial 1	1.1	S_TWN	F	0:01:58.370-0:01:58.636	BL	0.102907	8	0.385511
Trial 1	1.1	S_TWN	F	0:01:58.636-0:01:58.902	BL	0.0469908	8	0.176039
Trial 1	1.1	S_TWN	F	0:01:58.902-0:01:59.168	BL	0.140676	8	0.527012
Trial 1	1.1	S_TWN	F	0:01:59.168-0:01:59.434	BL	0.0453113	8	0.169747
Trial 1	1.1	S_TWN	F	0:01:59.434-0:01:59.700	BL	0.120235	8	0.45043
Trial 1	1.1	S_TWN	F	0:01:59.700-0:01:59.966	BL	0.0879733	8	0.329568
Trial 1	1.1	S_TWN	F	0:01:59.966-0:02:00.232	BL	0.112675	8	0.422106
Trial 1	1.1	S_TWN	F	0:02:00.232-0:02:00.498	BL	0.0803649	8	0.301068
Trial 1	1.1	S_TWN	F	0:02:00.498-0:02:00.764	BL	0.0523871	8	0.196255
Trial 1	1.1	S_TWN	F	0:02:00.764-0:02:01.030	BL	0.166715	8	0.624559
Trial 1	1.1	S_TWN	F	0:02:01.030-0:02:01.296	BL	0.0407084	8	0.152505
Trial 1	1.1	S_TWN	F	0:02:01.296-0:02:01.562	BL	0.150793	8	0.564905
Trial 1	1.1	S_TWN	F	0:02:01.562-0:02:01.828	BL	0.063094	8	0.236367
Trial 1	1.1	S_TWN	F	0:02:01.828-0:02:02.094	BL	0.0772005	8	0.289213
Trial 1	1.1	S_TWN	F	0:02:02.094-0:02:02.360	BL	0.0443353	8	0.166091
Trial 1	1.1	S_TWN	F	0:02:02.360-0:02:02.626	BL	0.0391738	8	0.146754
Trial 1	1.1	S_TWN	F	0:02:02.626-0:02:02.892	BL	0.0205041	8	0.0768136
Trial 1	1.1	S_TWN	F	0:02:02.892-0:02:03.158	BL	0.076019	8	0.284787
Trial 1	1.1	S_TWN	F	0:02:03.158-0:02:03.424	BL	0.0478565	8	0.179282
Trial 1	1.1	S_TWN	F	0:02:03.424-0:02:03.690	BL	0.0342393	7	0.146593
Trial 1	1.1	S_TWN	F	0:02:03.690-0:02:03.956	BL	0.054748	8	0.205099
Trial 1	1.1	S_TWN	F	0:02:03.956-0:02:04.222	BL	0.0182756	8	0.0684649
Trial 1	1.1	S_TWN	F	0:02:04.222-0:02:04.488	BL	0.120177	8	0.450211
Trial 1	1.1	S_TWN	F	0:02:04.488-0:02:04.754	BL	0.0973619	8	0.364741
Trial 1	1.1	S_TWN	F	0:02:04.754-0:02:05.020	BL	0.104646	8	0.392031
Trial 1	1.1	S_TWN	F	0:02:05.020-0:02:05.286	BL	0.104649	8	0.392043
Trial 1	1.1	S_TWN	F	0:02:05.286-0:02:05.552	BL	0.0831661	8	0.311559
Trial 1	1.1	S_TWN	F	0:02:05.552-0:02:05.818	BL	0.158612	8	0.594198
Trial 1	1.1	S_TWN	F	0:02:05.818-0:02:06.084	BL	0.0925015	8	0.346535
Trial 1	1.1	S_TWN	F	0:02:06.084-0:02:06.350	BL	0.0384264	8	0.143954
Trial 1	1.1	S_TWN	F	0:02:06.350-0:02:06.616	BL	0.0300858	8	0.112709
Trial 1	1.1	S_TWN	F	0:02:06.616-0:02:06.882	BL	0.0258909	8	0.0969935
Trial 1	1.1	S_TWN	F	0:02:06.882-0:02:07.148	BL	0.0406052	8	0.152117
Trial 1	1.1	S_TWN	F	0:02:07.148-0:02:07.414	BL	0.0482418	8	0.180727
Trial 1	1.1	S_TWN	F	0:02:07.414-0:02:07.680	BL	0.025153	8	0.0942295
Trial 1	1.1	S_TWN	F	0:02:07.680-0:02:07.946	BL	0.0402745	8	0.150881
Trial 1	1.1	S_TWN	F	0:02:07.946-0:02:08.212	BL	0.100781	8	0.377548
Trial 1	1.1	S_TWN	F	0:02:08.212-0:02:08.478	BL	0.182847	8	0.684991
Trial 1	1.1	S_TWN	F	0:02:08.478-0:02:08.744	BL	0.120968	8	0.453179
Trial 1	1.1	S_TWN	F	0:02:08.744-0:02:09.010	BL	0.170064	8	0.637098
Trial 1	1.1	S_TWN	F	0:02:09.010-0:02:09.276	BL	0.12291	8	0.460452
Trial 1	1.1	S_TWN	F	0:02:09.276-0:02:09.542	BL	0.108255	8	0.405548
Trial 1	1.1	S_TWN	F	0:02:09.542-0:02:09.808	BL	0.165564	8	0.620241
Trial 1	1.1	S_TWN	F	0:02:09.808-0:02:10.074	BL	0.116199	8	0.435317
Trial 1	1.1	S_TWN	F	0:02:10.074-0:02:10.340	BL	0.035445	8	0.132785
Trial 1	1.1	S_TWN	F	0:02:10.340-0:02:10.606	BL	0.0994057	8	0.372402
Trial 1	1.1	S_TWN	F	0:02:10.606-0:02:10.872	BL	0.0795972	8	0.298192
Trial 1	1.1	S_TWN	F	0:02:10.872-0:02:11.138	BL	0.31085	8	1.16452
Trial 1	1.1	S_TWN	F	0:02:11.138-0:02:11.404	BL	0.371087	8	1.39019
Trial 1	1.1	S_TWN	F	0:02:11.404-0:02:11.670	BL	0.259549	8	0.972332
Trial 1	1.1	S_TWN	F	0:02:11.670-0:02:11.936	BL	0.219169	8	0.821068
Trial 1	1.1	S_TWN	F	0:02:11.936-0:02:12.202	BL	0.324466	8	1.21553
Trial 1	1.1	S_TWN	F	0:02:12.202-0:02:12.468	BL	0.0852179	8	0.319248
Trial 1	1.1	S_TWN	F	0:02:12.468-0:02:12.734	BL	0.0675993	8	0.253244
Trial 1	1.1	S_TWN	F	0:02:12.734-0:02:13.000	BL	0.106267	8	0.398102
Trial 1	1.1	S_TWN	F	0:02:13.000-0:02:13.266	BL	0.0221869	7	0.0949914
Trial 1	1.1	S_TWN	F	0:02:13.266-0:02:13.532	BL	0.0667017	8	0.249882
Trial 1	1.1	S_TWN	F	0:02:13.532-0:02:13.798	BL	0.0635761	8	0.238171
Trial 1	1.1	S_TWN	F	0:02:13.798-0:02:14.064	BL	0.0693981	8	0.259983
Trial 1	1.1	S_TWN	F	0:02:14.064-0:02:14.330	BL	0.0427905	8	0.160303
Trial 1	1.1	S_TWN	F	0:02:14.330-0:02:14.596	BL	0.114803	8	0.430081
Trial 1	1.1	S_TWN	F	0:02:14.596-0:02:14.862	BL	0.158516	8	0.593844
Trial 1	1.1	S_TWN	F	0:02:14.862-0:02:15.128	BL	0.120624	8	0.451885
Trial 1	1.1	S_TWN	F	0:02:15.128-0:02:15.394	BL	0.151164	8	0.566296
Trial 1	1.1	S_TWN	F	0:02:15.394-0:02:15.660	BL	0.196696	8	0.736874
Trial 1	1.1	S_TWN	F	0:02:15.660-0:02:15.926	BL	0.117789	8	0.441267
Trial 1	1.1	S_TWN	F	0:02:15.926-0:02:16.192	BL	0.0890272	8	0.333519
Trial 1	1.1	S_TWN	F	0:02:16.192-0:02:16.458	BL	0.0647531	8	0.242581
Trial 1	1.1	S_TWN	F	0:02:16.458-0:02:16.724	BL	0.039298	8	0.147221
Trial 1	1.1	S_TWN	F	0:02:16.724-0:02:16.990	BL	0.042563	8	0.159453
Trial 1	1.1	S_TWN	F	0:02:16.990-0:02:17.256	BL	0.060644	8	0.227187
Trial 1	1.1	S_TWN	F	0:02:17.256-0:02:17.522	BL	0.0441695	8	0.16547
Trial 1	1.1	S_TWN	F	0:02:17.522-0:02:17.788	BL	0.0598153	8	0.224083
Trial 1	1.1	S_TWN	F	0:02:17.788-0:02:18.054	BL	0.0684046	8	0.256261
Trial 1	1.1	S_TWN	F	0:02:18.054-0:02:18.320	BL	0.0687913	8	0.257709
Trial 1	1.1	S_TWN	F	0:02:18.320-0:02:18.586	BL	0.0359658	8	0.134736
Trial 1	1.1	S_TWN	F	0:02:18.586-0:02:18.852	BL	0.108014	8	0.404651
Trial 1	1.1	S_TWN	F	0:02:18.852-0:02:19.118	BL	0.0972571	8	0.364349
Trial 1	1.1	S_TWN	F	0:02:19.118-0:02:19.384	BL	0.0871865	8	0.326622
Trial 1	1.1	S_TWN	F	0:02:19.384-0:02:19.650	BL	0.0340388	8	0.127517
Trial 1	1.1	S_TWN	F	0:02:19.650-0:02:19.916	BL	0.0318858	8	0.119452
Trial 1	1.1	S_TWN	F	0:02:19.916-0:02:20.182	BL	0.0763356	8	0.285972
Trial 1	1.1	S_TWN	F	0:02:20.182-0:02:20.448	BL	0.0405976	8	0.152089
Trial 1	1.1	S_TWN	F	0:02:20.448-0:02:20.714	BL	0.09063	8	0.339524
Trial 1	1.1	S_TWN	F	0:02:20.714-0:02:20.980	BL	0.0510314	8	0.191175
Trial 1	1.1	S_TWN	F	0:02:20.980-0:02:21.246	BL	0.111363	8	0.417193
Trial 1	1.1	S_TWN	F	0:02:21.246-0:02:21.512	BL	0.0477598	8	0.178921
Trial 1	1.1	S_TWN	F	0:02:21.512-0:02:21.778	BL	0.0520348	8	0.194935
Trial 1	1.1	S_TWN	F	0:02:21.778-0:02:22.044	BL	0.054225	8	0.20314
Trial 1	1.1	S_TWN	F	0:02:22.044-0:02:22.310	BL	0.0668791	8	0.250548
Trial 1	1.1	S_TWN	F	0:02:22.310-0:02:22.576	BL	0.123433	8	0.462407
Trial 1	1.1	S_TWN	F	0:02:22.576-0:02:22.842	BL	0.0476719	7	0.204103
Trial 1	1.1	S_TWN	F	0:02:22.842-0:02:23.108	BL	0.143493	8	0.537565
Trial 1	1.1	S_TWN	F	0:02:23.108-0:02:23.374	BL	0.0499607	8	0.187164
Trial 1	1.1	S_TWN	F	0:02:23.374-0:02:23.640	BL	0.126948	8	0.475578
Trial 1	1.1	S_TWN	F	0:02:23.640-0:02:23.906	BL	0.0320015	8	0.119885
Trial 1	1.1	S_TWN	F	0:02:23.906-0:02:24.172	BL	0.0747106	8	0.279883
Trial 1	1.1	S_TWN	F	0:02:24.172-0:02:24.438	BL	0.0643887	8	0.241216
Trial 1	1.1	S_TWN	F	0:02:24.438-0:02:24.704	BL	0.0446226	8	0.167167
Trial 1	1.1	S_TWN	F	0:02:24.704-0:02:24.970	BL	0.0680796	8	0.255043
Trial 1	1.1	S_TWN	F	0:02:24.970-0:02:25.236	BL	0.0768286	8	0.28782
Trial 1	1.1	S_TWN	F	0:02:25.236-0:02:25.502	BL	0.0949698	8	0.35578
Trial 1	1.1	S_TWN	F	0:02:25.502-0:02:25.768	BL	0.0772849	8	0.289529
Trial 1	1.1	S_TWN	F	0:02:25.768-0:02:26.034	BL	0.119527	8	0.447779
Trial 1	1.1	S_TWN	F	0:02:26.034-0:02:26.300	BL	0.0724846	8	0.271546
Trial 1	1.1	S_TWN	F	0:02:26.300-0:02:26.566	BL	0.12672	8	0.474723
Trial 1	1.1	S_TWN	F	0:02:26.566-0:02:26.832	BL	0.0716219	8	0.268314
Trial 1	1.1	S_TWN	F	0:02:26.832-0:02:27.098	BL	0.0483217	8	0.181024
Trial 1	1.1	S_TWN	F	0:02:27.098-0:02:27.364	BL	0.0568648	8	0.213029
Trial 1	1.1	S_TWN	F	0:02:27.364-0:02:27.630	BL	0.0929031	8	0.348037
Trial 1	1.1	S_TWN	F	0:02:27.630-0:02:27.896	BL	0.0596086	8	0.223309
Trial 1	1.1	S_TWN	F	0:02:27.896-0:02:28.162	BL	0.0355724	8	0.133263
Trial 1	1.1	S_TWN	F	0:02:28.162-0:02:28.428	BL	0.0782167	8	0.293018
Trial 1	1.1	S_TWN	F	0:02:28.428-0:02:28.694	BL	0.0386121	8	0.144651
Trial 1	1.1	S_TWN	F	0:02:28.694-0:02:28.960	BL	0.0169013	8	0.0633173
Trial 1	1.1	S_TWN	F	0:02:28.960-0:02:29.226	BL	0.100727	8	0.377346
Trial 1	1.1	S_TWN	F	0:02:29.226-0:02:29.492	BL	0.0741123	8	0.277642
Trial 1	1.1	S_TWN	F	0:02:29.492-0:02:29.758	BL	0.109441	8	0.409993
Trial 1	1.1	S_TWN	F	0:02:29.758-0:02:30.024	BL	0.0411089	8	0.154004
Trial 1	1.1	S_TWN	F	0:02:30.024-0:02:30.290	BL	0.0671525	8	0.25157
Trial 1	1.1	S_TWN	F	0:02:30.290-0:02:30.556	BL	0.073376	8	0.274884
Trial 1	1.1	S_TWN	F	0:02:30.556-0:02:30.822	BL	0.0640107	8	0.239802
Trial 1	1.1	S_TWN	F	0:02:30.822-0:02:31.088	BL	0.105228	8	0.394213
Trial 1	1.1	S_TWN	F	0:02:31.088-0:02:31.354	BL	0.0702054	8	0.263006
Trial 1	1.1	S_TWN	F	0:02:31.354-0:02:31.620	BL	0.0655277	8	0.245483
Trial 1	1.1	S_TWN	F	0:02:31.620-0:02:31.886	BL	0.0805415	8	0.301728
Trial 1	1.1	S_TWN	F	0:02:31.886-0:02:32.152	BL	0.0911873	7	0.390414
Trial 1	1.1	S_TWN	F	0:02:32.152-0:02:32.418	BL	0.0603819	8	0.226207
Trial 1	1.1	S_TWN	F	0:02:32.418-0:02:32.684	BL	0.0314219	8	0.117714
Trial 1	1.1	S_TWN	F	0:02:32.684-0:02:32.950	BL	0.0819723	8	0.307087
Trial 1	1.1	S_TWN	F	0:02:32.950-0:02:33.216	BL	0.0615423	8	0.230552
Trial 1	1.1	S_TWN	F	0:02:33.216-0:02:33.482	BL	0.0666699	8	0.249761
Trial 1	1.1	S_TWN	F	0:02:33.482-0:02:33.748	BL	0.0514283	8	0.192663
Trial 1	1.1	S_TWN	F	0:02:33.748-0:02:34.014	BL	0.101781	8	0.381295
Trial 1	1.1	S_TWN	F	0:02:34.014-0:02:34.280	BL	0.0634846	8	0.237831
Trial 1	1.1	S_TWN	F	0:02:34.280-0:02:34.546	BL	0.0551095	8	0.206455
Trial 1	1.1	S_TWN	F	0:02:34.546-0:02:34.812	BL	0.0430524	8	0.161285
Trial 1	1.1	S_TWN	F	0:02:34.812-0:02:35.078	BL	0.0409147	8	0.153278
Trial 1	1.1	S_TWN	F	0:02:35.078-0:02:35.344	BL	0.0358604	8	0.134343
Trial 1	1.1	S_TWN	F	0:02:35.344-0:02:35.610	BL	0.0560973	8	0.210154
Trial 1	1.1	S_TWN	F	0:02:35.610-0:02:35.876	BL	0.073867	8	0.276725
Trial 1	1.1	S_TWN	F	0:02:35.876-0:02:36.142	BL	0.0497929	8	0.186536
Trial 1	1.1	S_TWN	F	0:02:36.142-0:02:36.408	BL	0.12234	8	0.458314
Trial 1	1.1	S_TWN	F	0:02:36.408-0:02:36.674	BL	0.0174961	8	0.0655445
Trial 1	1.1	S_TWN	F	0:02:36.674-0:02:36.940	BL	0.0830601	8	0.311162
Trial 1	1.1	S_TWN	F	0:02:36.940-0:02:37.206	BL	0.0138053	8	0.051718
Trial 1	1.1	S_TWN	F	0:02:37.206-0:02:37.472	BL	0.0770244	8	0.288552
Trial 1	1.1	S_TWN	F	0:02:37.472-0:02:37.738	BL	0.0166187	8	0.0622578
Trial 1	1.1	S_TWN	F	0:02:37.738-0:02:38.004	BL	0.0498056	8	0.186584
Trial 1	1.1	S_TWN	F	0:02:38.004-0:02:38.270	BL	0.0320489	8	0.120063
Trial 1	1.1	S_TWN	F	0:02:38.270-0:02:38.536	BL	0.0124138	8	0.0465053
Trial 1	1.1	S_TWN	F	0:02:38.536-0:02:38.802	BL	0.0532943	8	0.199653
Trial 1	1.1	S_TWN	F	0:02:38.802-0:02:39.068	BL	0.0158144	8	0.0592448
Trial 1	1.1	S_TWN	F	0:02:39.068-0:02:39.334	BL	0.0303068	8	0.113537
Trial 1	1.1	S_TWN	F	0:02:39.334-0:02:39.600	BL	0.0640853	8	0.24008
Trial 1	1.1	S_TWN	F	0:02:39.600-0:02:39.866	BL	0.0620419	8	0.232424
Trial 1	1.1	S_TWN	F	0:02:39.866-0:02:40.132	BL	0.0367683	8	0.137744
Trial 1	1.1	S_TWN	F	0:02:40.132-0:02:40.398	BL	0.0975435	8	0.365421
Trial 1	1.1	S_TWN	F	0:02:40.398-0:02:40.664	BL	0.0611442	8	0.22906
Trial 1	1.1	S_TWN	F	0:02:40.664-0:02:40.930	BL	0.0459957	8	0.172312
Trial 1	1.1	S_TWN	F	0:02:40.930-0:02:41.196	BL	0.165019	8	0.618201
Trial 1	1.1	S_TWN	F	0:02:41.196-0:02:41.462	BL	0.0342172	8	0.128186
Trial 1	1.1	S_TWN	F	0:02:41.462-0:02:41.728	BL	0.0572724	7	0.245209
Trial 1	1.1	S_TWN	F	0:02:41.728-0:02:41.994	BL	0.0482343	8	0.180698
Trial 1	1.1	S_TWN	F	0:02:41.994-0:02:42.260	BL	0.02854	8	0.106918
Trial 1	1.1	S_TWN	F	0:02:42.260-0:02:42.526	BL	0.0600132	8	0.224823
Trial 1	1.1	S_TWN	F	0:02:42.526-0:02:42.792	BL	0.0745159	8	0.279155
Trial 1	1.1	S_TWN	F	0:02:42.792-0:02:43.058	BL	0.0535155	8	0.200482
Trial 1	1.1	S_TWN	F	0:02:43.058-0:02:43.324	BL	0.0326465	8	0.122302
Trial 1	1.1	S_TWN	F	0:02:43.324-0:02:43.590	BL	0.0442929	8	0.165932
Trial 1	1.1	S_TWN	F	0:02:43.590-0:02:43.856	BL	0.0552957	8	0.207151
Trial 1	1.1	S_TWN	F	0:02:43.856-0:02:44.122	BL	0.0342764	8	0.12841
Trial 1	1.1	S_TWN	F	0:02:44.122-0:02:44.388	BL	0.0520808	8	0.195106
Trial 1	1.1	S_TWN	F	0:02:44.388-0:02:44.654	BL	0.0441828	8	0.165519
Trial 1	1.1	S_TWN	F	0:02:44.654-0:02:44.920	BL	0.0630989	8	0.236383
Trial 1	1.1	S_TWN	F	0:02:44.920-0:02:45.186	BL	0.0735452	8	0.275517
Trial 1	1.1	S_TWN	F	0:02:45.186-0:02:45.452	BL	0.0379482	8	0.142164
Trial 1	1.1	S_TWN	F	0:02:45.452-0:02:45.718	BL	0.0248293	8	0.0930173
Trial 1	1.1	S_TWN	F	0:02:45.718-0:02:45.984	BL	0.0655375	8	0.245519
Trial 1	1.1	S_TWN	F	0:02:45.984-0:02:46.250	BL	0.0360392	8	0.135011
Trial 1	1.1	S_TWN	F	0:02:46.250-0:02:46.516	BL	0.0744112	8	0.278761
Trial 1	1.1	S_TWN	F	0:02:46.516-0:02:46.782	BL	0.0400589	8	0.150071
Trial 1	1.1	S_TWN	F	0:02:46.782-0:02:47.048	BL	0.0666638	8	0.249741
Trial 1	1.1	S_TWN	F	0:02:47.048-0:02:47.314	BL	0.0628244	8	0.235357
Trial 1	1.1	S_TWN	F	0:02:47.314-0:02:47.580	BL	0.066579	8	0.249421
Trial 1	1.1	S_TWN	F	0:02:47.580-0:02:47.846	BL	0.0571873	8	0.214239
Trial 1	1.1	S_TWN	F	0:02:47.846-0:02:48.112	BL	0.0614084	8	0.230051
Trial 1	1.1	S_TWN	F	0:02:48.112-0:02:48.378	BL	0.14218	8	0.53264
Trial 1	1.1	S_TWN	F	0:02:48.378-0:02:48.644	BL	0.0642017	8	0.240517
Trial 1	1.1	S_TWN	F	0:02:48.644-0:02:48.910	BL	0.0848996	8	0.318056
Trial 1	1.1	S_TWN	F	0:02:48.910-0:02:49.176	BL	0.0425335	8	0.159341
Trial 1	1.1	S_TWN	F	0:02:49.176-0:02:49.442	BL	0.0590327	8	0.22115
Trial 1	1.1	S_TWN	F	0:02:49.442-0:02:49.708	BL	0.0238382	8	0.0893034
Trial 1	1.1	S_TWN	F	0:02:49.708-0:02:49.974	BL	0.0466478	8	0.174756
Trial 1	1.1	S_TWN	F	0:02:49.974-0:02:50.240	BL	0.0351021	8	0.131501
Trial 1	1.1	S_TWN	F	0:02:50.240-0:02:50.506	BL	0.0249744	8	0.0935611
Trial 1	1.1	S_TWN	F	0:02:50.506-0:02:50.772	BL	0.0431119	8	0.161509
Trial 1	1.1	S_TWN	F	0:02:50.772-0:02:51.038	BL	0.0656671	8	0.246006
Trial 1	1.1	S_TWN	F	0:02:51.038-0:02:51.304	BL	0.0189922	7	0.0813135
Trial 1	1.1	S_TWN	F	0:02:51.304-0:02:51.570	BL	0.0149042	8	0.0558351
Trial 1	1.1	S_TWN	F	0:02:51.570-0:02:51.836	BL	0.0225158	8	0.0843493
Trial 1	1.1	S_TWN	F	0:02:51.836-0:02:52.102	BL	0.0186206	8	0.0697579
Trial 1	1.1	S_TWN	F	0:02:52.102-0:02:52.368	BL	0.0220677	8	0.0826711
Trial 1	1.1	S_TWN	F	0:02:52.368-0:02:52.634	BL	0.10662	8	0.399427
Trial 1	1.1	S_TWN	F	0:02:52.634-0:02:52.900	BL	0.0876938	8	0.328526
Trial 1	1.1	S_TWN	F	0:02:52.900-0:02:53.166	BL	0.0896746	8	0.335944
Trial 1	1.1	S_TWN	F	0:02:53.166-0:02:53.432	BL	0.0678765	8	0.254283
Trial 1	1.1	S_TWN	F	0:02:53.432-0:02:53.698	BL	0.0918584	8	0.344123
Trial 1	1.1	S_TWN	F	0:02:53.698-0:02:53.964	BL	0.120703	8	0.452183
Trial 1	1.1	S_TWN	F	0:02:53.964-0:02:54.230	BL	0.0621974	8	0.233007
Trial 1	1.1	S_TWN	F	0:02:54.230-0:02:54.496	BL	0.0962553	8	0.360595
Trial 1	1.1	S_TWN	F	0:02:54.496-0:02:54.762	BL	0.0266252	8	0.099745
Trial 1	1.1	S_TWN	F	0:02:54.762-0:02:55.028	BL	0.109758	8	0.41118
Trial 1	1.1	S_TWN	F	0:02:55.028-0:02:55.294	BL	0.0860051	8	0.322197
Trial 1	1.1	S_TWN	F	0:02:55.294-0:02:55.560	BL	0.0902435	8	0.338075
Trial 1	1.1	S_TWN	F	0:02:55.560-0:02:55.826	BL	0.0256062	8	0.0959268
Trial 1	1.1	S_TWN	F	0:02:55.826-0:02:56.092	BL	0.0516114	8	0.19335
Trial 1	1.1	S_TWN	F	0:02:56.092-0:02:56.358	BL	0.038918	8	0.145797
Trial 1	1.1	S_TWN	F	0:02:56.358-0:02:56.624	BL	0.0500594	8	0.187533
Trial 1	1.1	S_TWN	F	0:02:56.624-0:02:56.890	BL	0.0663574	8	0.248592
Trial 1	1.1	S_TWN	F	0:02:56.890-0:02:57.156	BL	0.0390099	8	0.14614
Trial 1	1.1	S_TWN	F	0:02:57.156-0:02:57.422	BL	0.0528114	8	0.197845
Trial 1	1.1	S_TWN	F	0:02:57.422-0:02:57.688	BL	0.0145966	8	0.0546824
Trial 1	1.1	S_TWN	F	0:02:57.688-0:02:57.954	BL	0.0985239	8	0.369093
Trial 1	1.1	S_TWN	F	0:02:57.954-0:02:58.220	BL	0.0403844	8	0.15129
Trial 1	1.1	S_TWN	F	0:02:58.220-0:02:58.486	BL	0.0644501	8	0.241445
Trial 1	1.1	S_TWN	F	0:02:58.486-0:02:58.752	BL	0.0621029	8	0.232652
Trial 1	1.1	S_TWN	F	0:02:58.752-0:02:59.018	BL	0.0402383	8	0.150743
Trial 1	1.1	S_TWN	F	0:02:59.018-0:02:59.284	BL	0.047963	8	0.179682
Trial 1	1.1	S_TWN	F	0:02:59.284-0:02:59.550	BL	0.015039	8	0.0563402
Trial 1	1.1	S_TWN	F	0:02:59.550-0:02:59.816	BL	0.0575098	8	0.215447
Trial 1	1.1	S_TWN	F	0:02:59.816-0:03:00.082	BL	0.025999	8	0.0973984
Trial 1	1.1	S_TWN	F	0:03:00.082-0:03:00.348	CS1a	0.0625601	8	0.234365
Trial 1	1.1	S_TWN	F	0:03:00.348-0:03:00.614	CS1a	0.010113	8	0.0378858
Trial 1	1.1	S_TWN	F	0:03:00.614-0:03:00.880	CS1a	0.0588409	7	0.251922
Trial 1	1.1	S_TWN	F	0:03:00.880-0:03:01.146	CS1a	0.0513436	8	0.192347
Trial 1	1.1	S_TWN	F	0:03:01.146-0:03:01.412	CS1a	0.031571	8	0.118272
Trial 1	1.1	S_TWN	F	0:03:01.412-0:03:01.678	CS1a	0.0573357	8	0.214794
Trial 1	1.1	S_TWN	F	0:03:01.678-0:03:01.944	CS1a	0.0388662	8	0.145602
Trial 1	1.1	S_TWN	F	0:03:01.944-0:03:02.210	CS1a	0.0443806	8	0.16626
Trial 1	1.1	S_TWN	F	0:03:02.210-0:03:02.476	CS1a	0.0393031	8	0.147239
Trial 1	1.1	S_TWN	F	0:03:02.476-0:03:02.742	CS1a	0.261043	8	0.977934
Trial 1	1.1	S_TWN	F	0:03:02.742-0:03:03.008	CS1a	0.0955612	8	0.357998
Trial 1	1.1	S_TWN	F	0:03:03.008-0:03:03.274	CS1a	0.0945167	8	0.354084
Trial 1	1.1	S_TWN	F	0:03:03.274-0:03:03.540	CS1a	0.15621	8	0.5852
Trial 1	1.1	S_TWN	F	0:03:03.540-0:03:03.806	CS1a	0.125298	8	0.4694
Trial 1	1.1	S_TWN	F	0:03:03.806-0:03:04.072	CS1a	0.0890988	8	0.333786
Trial 1	1.1	S_TWN	F	0:03:04.072-0:03:04.338	CS1a	0.11576	8	0.43367
Trial 1	1.1	S_TWN	F	0:03:04.338-0:03:04.604	CS1a	0.121225	8	0.454138
Trial 1	1.1	S_TWN	F	0:03:04.604-0:03:04.870	CS1a	0.0822918	8	0.308284
Trial 1	1.1	S_TWN	F	0:03:04.870-0:03:05.136	CS1a	0.0682951	8	0.255852
Trial 1	1.1	S_TWN	F	0:03:05.136-0:03:05.402	CS1a	0.0717097	8	0.268641
Trial 1	1.1	S_TWN	F	0:03:05.402-0:03:05.668	CS1a	0.0276988	8	0.103767
Trial 1	1.1	S_TWN	F	0:03:05.668-0:03:05.934	CS1a	0.0275236	8	0.10311
Trial 1	1.1	S_TWN	F	0:03:05.934-0:03:06.200	CS1a	0.0502335	8	0.188186
Trial 1	1.1	S_TWN	F	0:03:06.200-0:03:06.466	CS1a	0.0638053	8	0.23903
Trial 1	1.1	S_TWN	F	0:03:06.466-0:03:06.732	CS1a	0.063539	8	0.238032
Trial 1	1.1	S_TWN	F	0:03:06.732-0:03:06.998	CS1a	0.0553721	8	0.207437
Trial 1	1.1	S_TWN	F	0:03:06.998-0:03:07.264	CS1a	0.0506422	8	0.189718
Trial 1	1.1	S_TWN	F	0:03:07.264-0:03:07.530	CS1a	0.0671079	8	0.251402
Trial 1	1.1	S_TWN	F	0:03:07.530-0:03:07.796	CS1a	0.0188602	8	0.0706556
Trial 1	1.1	S_TWN	F	0:03:07.796-0:03:08.062	CS1a	0.0463242	8	0.173541
Trial 1	1.1	S_TWN	F	0:03:08.062-0:03:08.328	CS1a	0.0398214	8	0.149182
Trial 1	1.1	S_TWN	F	0:03:08.328-0:03:08.594	CS1a	0.028464	8	0.106633
Trial 1	1.1	S_TWN	F	0:03:08.594-0:03:08.860	CS1a	0.0720325	8	0.269851
Trial 1	1.1	S_TWN	F	0:03:08.860-0:03:09.126	CS1a	0.066014	8	0.247305
Trial 1	1.1	S_TWN	F	0:03:09.126-0:03:09.392	CS1a	0.0549848	8	0.205986
Trial 1	1.1	S_TWN	F	0:03:09.392-0:03:09.658	CS1a	0.0158698	8	0.0594523
Trial 1	1.1	S_TWN	F	0:03:09.658-0:03:09.924	CS1a	0.0311395	8	0.116656
Trial 1	1.1	S_TWN	F	0:03:09.924-0:03:10.190	CS1a	0.0214246	7	0.0917276
Trial 1	1.1	S_TWN	F	0:03:10.190-0:03:10.456	CS1b	0.2447	8	0.916712
Trial 1	1.1	S_TWN	F	0:03:10.456-0:03:10.722	CS1b	0.157678	8	0.590698
Trial 1	1.1	S_TWN	F	0:03:10.722-0:03:10.988	CS1b	1.50561	8	5.64038
Trial 1	1.1	S_TWN	F	0:03:10.988-0:03:11.254	CS1b	3.49641	8	13.0985
Trial 1	1.1	S_TWN	F	0:03:11.254-0:03:11.520	CS1b	2.21182	8	8.286
Trial 1	1.1	S_TWN	F	0:03:11.520-0:03:11.786	CS1b	3.90393	8	14.6252
Trial 1	1.1	S_TWN	F	0:03:11.786-0:03:12.052	CS1b	5.77634	8	21.6396
Trial 1	1.1	S_TWN	F	0:03:12.052-0:03:12.318	CS1b	4.24854	8	15.9161
Trial 1	1.1	S_TWN	F	0:03:12.318-0:03:12.584	CS1b	0.546692	8	2.04805
Trial 1	1.1	S_TWN	F	0:03:12.584-0:03:12.850	CS1b	0.368173	8	1.37926
Trial 1	1.1	S_TWN	F	0:03:12.850-0:03:13.116	CS1b	0.966157	8	3.61948
Trial 1	1.1	S_TWN	F	0:03:13.116-0:03:13.382	CS1b	1.29727	8	4.85989
Trial 1	1.1	S_TWN	F	0:03:13.382-0:03:13.648	CS1b	0.63124	8	2.36477
Trial 1	1.1	S_TWN	F	0:03:13.648-0:03:13.914	CS1b	0.385911	8	1.44573
Trial 1	1.1	S_TWN	F	0:03:13.914-0:03:14.180	CS1b	1.1199	8	4.19542
Trial 1	1.1	S_TWN	F	0:03:14.180-0:03:14.446	CS1b	1.36701	8	5.12119
Trial 1	1.1	S_TWN	F	0:03:14.446-0:03:14.712	CS1b	0.647457	8	2.42553
Trial 1	1.1	S_TWN	F	0:03:14.712-0:03:14.978	CS1b	3.99843	8	14.9791
Trial 1	1.1	S_TWN	F	0:03:14.978-0:03:15.244	CS1b	1.07687	8	4.03424
Trial 1	1.1	S_TWN	F	0:03:15.244-0:03:15.510	CS1b	1.32985	8	4.98196
Trial 1	1.1	S_TWN	F	0:03:15.510-0:03:15.776	CS1b	0.984592	8	3.68853
Trial 1	1.1	S_TWN	F	0:03:15.776-0:03:16.042	CS1b	0.810763	8	3.03731
Trial 1	1.1	S_TWN	F	0:03:16.042-0:03:16.308	CS1b	0.957059	8	3.58538
Trial 1	1.1	S_TWN	F	0:03:16.308-0:03:16.574	CS1b	0.456664	8	1.71078
Trial 1	1.1	S_TWN	F	0:03:16.574-0:03:16.840	CS1b	0.90675	8	3.39691
Trial 1	1.1	S_TWN	F	0:03:16.840-0:03:17.106	CS1b	1.41109	8	5.2863
Trial 1	1.1	S_TWN	F	0:03:17.106-0:03:17.372	CS1b	0.501501	8	1.87874
Trial 1	1.1	S_TWN	F	0:03:17.372-0:03:17.638	CS1b	0.548946	8	2.05648
Trial 1	1.1	S_TWN	F	0:03:17.638-0:03:17.904	CS1b	1.09437	8	4.0998
Trial 1	1.1	S_TWN	F	0:03:17.904-0:03:18.170	CS1b	0.881141	8	3.30097
Trial 1	1.1	S_TWN	F	0:03:18.170-0:03:18.436	CS1b	1.47751	8	5.53513
Trial 1	1.1	S_TWN	F	0:03:18.436-0:03:18.702	CS1b	0.370981	8	1.38978
Trial 1	1.1	S_TWN	F	0:03:18.702-0:03:18.968	CS1b	1.033	8	3.86988
Trial 1	1.1	S_TWN	F	0:03:18.968-0:03:19.234	CS1b	1.26419	8	4.736
Trial 1	1.1	S_TWN	F	0:03:19.234-0:03:19.500	CS1b	1.70441	8	6.38516
Trial 1	1.1	S_TWN	F	0:03:19.500-0:03:19.766	CS1b	0.776348	7	3.32388
Trial 1	1.1	S_TWN	F	0:03:19.766-0:03:20.032	CS1b	1.79135	8	6.71081
Trial 1	1.1	S_TWN	F	0:03:20.032-0:03:20.298	IT1	0.323302	8	1.21116
Trial 1	1.1	S_TWN	F	0:03:20.298-0:03:20.564	IT1	0.65097	8	2.43871
Trial 1	1.1	S_TWN	F	0:03:20.564-0:03:20.830	IT1	1.24112	8	4.64958
Trial 1	1.1	S_TWN	F	0:03:20.830-0:03:21.096	IT1	0.61227	8	2.29371
Trial 1	1.1	S_TWN	F	0:03:21.096-0:03:21.362	IT1	0.201283	8	0.754056
Trial 1	1.1	S_TWN	F	0:03:21.362-0:03:21.628	IT1	0.213112	8	0.798371
Trial 1	1.1	S_TWN	F	0:03:21.628-0:03:21.894	IT1	0.474629	8	1.77809
Trial 1	1.1	S_TWN	F	0:03:21.894-0:03:22.160	IT1	0.49463	8	1.85301
Trial 1	1.1	S_TWN	F	0:03:22.160-0:03:22.426	IT1	0.342565	8	1.28333
Trial 1	1.1	S_TWN	F	0:03:22.426-0:03:22.692	IT1	0.264217	8	0.989826
Trial 1	1.1	S_TWN	F	0:03:22.692-0:03:22.958	IT1	0.366076	8	1.37141
Trial 1	1.1	S_TWN	F	0:03:22.958-0:03:23.224	IT1	0.197118	8	0.738456
Trial 1	1.1	S_TWN	F	0:03:23.224-0:03:23.490	IT1	0.107732	8	0.403592
Trial 1	1.1	S_TWN	F	0:03:23.490-0:03:23.756	IT1	0.222793	8	0.834637
Trial 1	1.1	S_TWN	F	0:03:23.756-0:03:24.022	IT1	0.437965	8	1.64072
Trial 1	1.1	S_TWN	F	0:03:24.022-0:03:24.288	IT1	0.422392	8	1.58237
Trial 1	1.1	S_TWN	F	0:03:24.288-0:03:24.554	IT1	0.255457	8	0.957004
Trial 1	1.1	S_TWN	F	0:03:24.554-0:03:24.820	IT1	0.632877	8	2.37091
Trial 1	1.1	S_TWN	F	0:03:24.820-0:03:25.086	IT1	0.700259	8	2.62334
Trial 1	1.1	S_TWN	F	0:03:25.086-0:03:25.352	IT1	0.476954	8	1.78679
Trial 1	1.1	S_TWN	F	0:03:25.352-0:03:25.618	IT1	0.577741	8	2.16435
Trial 1	1.1	S_TWN	F	0:03:25.618-0:03:25.884	IT1	1.01306	8	3.7952
Trial 1	1.1	S_TWN	F	0:03:25.884-0:03:26.150	IT1	0.525965	8	1.9704
Trial 1	1.1	S_TWN	F	0:03:26.150-0:03:26.416	IT1	0.379221	8	1.42066
Trial 1	1.1	S_TWN	F	0:03:26.416-0:03:26.682	IT1	0.231926	8	0.868856
Trial 1	1.1	S_TWN	F	0:03:26.682-0:03:26.948	IT1	0.111952	8	0.419398
Trial 1	1.1	S_TWN	F	0:03:26.948-0:03:27.214	IT1	0.209832	8	0.786076
Trial 1	1.1	S_TWN	F	0:03:27.214-0:03:27.480	IT1	0.196426	8	0.735861
Trial 1	1.1	S_TWN	F	0:03:27.480-0:03:27.746	IT1	0.161042	8	0.603306
Trial 1	1.1	S_TWN	F	0:03:27.746-0:03:28.012	IT1	0.312767	8	1.1717
Trial 1	1.1	S_TWN	F	0:03:28.012-0:03:28.278	IT1	0.171632	8	0.642975
Trial 1	1.1	S_TWN	F	0:03:28.278-0:03:28.544	IT1	0.243066	8	0.910592
Trial 1	1.1	S_TWN	F	0:03:28.544-0:03:28.810	IT1	0.170342	8	0.638147
Trial 1	1.1	S_TWN	F	0:03:28.810-0:03:29.076	IT1	0.0666709	8	0.249767
Trial 1	1.1	S_TWN	F	0:03:29.076-0:03:29.342	IT1	0.0593146	7	0.253951
Trial 1	1.1	S_TWN	F	0:03:29.342-0:03:29.608	IT1	0.0573734	8	0.214937
Trial 1	1.1	S_TWN	F	0:03:29.608-0:03:29.874	IT1	0.0993579	8	0.372219
Trial 1	1.1	S_TWN	F	0:03:29.874-0:03:30.140	IT1	0.0376688	8	0.141116
Trial 1	1.1	S_TWN	F	0:03:30.140-0:03:30.406	IT1	0.117245	8	0.439225
Trial 1	1.1	S_TWN	F	0:03:30.406-0:03:30.672	IT1	0.118428	8	0.443659
Trial 1	1.1	S_TWN	F	0:03:30.672-0:03:30.938	IT1	0.131253	8	0.491706
Trial 1	1.1	S_TWN	F	0:03:30.938-0:03:31.204	IT1	0.0734302	8	0.275088
Trial 1	1.1	S_TWN	F	0:03:31.204-0:03:31.470	IT1	0.0870898	8	0.326259
Trial 1	1.1	S_TWN	F	0:03:31.470-0:03:31.736	IT1	0.071539	8	0.268002
Trial 1	1.1	S_TWN	F	0:03:31.736-0:03:32.002	IT1	0.0293085	8	0.109797
Trial 1	1.1	S_TWN	F	0:03:32.002-0:03:32.268	IT1	0.101441	8	0.380024
Trial 1	1.1	S_TWN	F	0:03:32.268-0:03:32.534	IT1	0.260304	8	0.975162
Trial 1	1.1	S_TWN	F	0:03:32.534-0:03:32.800	IT1	0.30666	8	1.14883
Trial 1	1.1	S_TWN	F	0:03:32.800-0:03:33.066	IT1	0.200186	8	0.749942
Trial 1	1.1	S_TWN	F	0:03:33.066-0:03:33.332	IT1	0.226859	8	0.849867
Trial 1	1.1	S_TWN	F	0:03:33.332-0:03:33.598	IT1	0.142364	8	0.533332
Trial 1	1.1	S_TWN	F	0:03:33.598-0:03:33.864	IT1	0.0896194	8	0.335734
Trial 1	1.1	S_TWN	F	0:03:33.864-0:03:34.130	IT1	0.0791977	8	0.296694
Trial 1	1.1	S_TWN	F	0:03:34.130-0:03:34.396	IT1	0.0505566	8	0.189397
Trial 1	1.1	S_TWN	F	0:03:34.396-0:03:34.662	IT1	0.0965415	8	0.361667
Trial 1	1.1	S_TWN	F	0:03:34.662-0:03:34.928	IT1	0.0415148	8	0.155526
Trial 1	1.1	S_TWN	F	0:03:34.928-0:03:35.194	IT1	0.0689902	8	0.258456
Trial 1	1.1	S_TWN	F	0:03:35.194-0:03:35.460	IT1	0.0208885	8	0.0782539
Trial 1	1.1	S_TWN	F	0:03:35.460-0:03:35.726	IT1	0.0895613	8	0.335518
Trial 1	1.1	S_TWN	F	0:03:35.726-0:03:35.992	IT1	0.0649329	8	0.243255
Trial 1	1.1	S_TWN	F	0:03:35.992-0:03:36.258	IT1	0.0595068	8	0.222927
Trial 1	1.1	S_TWN	F	0:03:36.258-0:03:36.524	IT1	0.215584	8	0.807625
Trial 1	1.1	S_TWN	F	0:03:36.524-0:03:36.790	IT1	0.156329	8	0.585644
Trial 1	1.1	S_TWN	F	0:03:36.790-0:03:37.056	IT1	0.283983	8	1.06387
Trial 1	1.1	S_TWN	F	0:03:37.056-0:03:37.322	IT1	0.0804197	8	0.301271
Trial 1	1.1	S_TWN	F	0:03:37.322-0:03:37.588	IT1	0.319714	8	1.19772
Trial 1	1.1	S_TWN	F	0:03:37.588-0:03:37.854	IT1	0.0704091	8	0.263769
Trial 1	1.1	S_TWN	F	0:03:37.854-0:03:38.120	IT1	0.201742	8	0.755776
Trial 1	1.1	S_TWN	F	0:03:38.120-0:03:38.386	IT1	0.142359	8	0.53331
Trial 1	1.1	S_TWN	F	0:03:38.386-0:03:38.652	IT1	0.167638	8	0.628007
Trial 1	1.1	S_TWN	F	0:03:38.652-0:03:38.918	IT1	0.120785	7	0.517133
Trial 1	1.1	S_TWN	F	0:03:38.918-0:03:39.184	IT1	0.0541602	8	0.202897
Trial 1	1.1	S_TWN	F	0:03:39.184-0:03:39.450	IT1	0.254179	8	0.952223
Trial 1	1.1	S_TWN	F	0:03:39.450-0:03:39.716	IT1	0.108653	8	0.407043
Trial 1	1.1	S_TWN	F	0:03:39.716-0:03:39.982	IT1	0.349796	8	1.31042
Trial 1	1.1	S_TWN	F	0:03:39.982-0:03:40.248	IT1	0.0783465	8	0.293506
Trial 1	1.1	S_TWN	F	0:03:40.248-0:03:40.514	IT1	0.0843875	8	0.316137
Trial 1	1.1	S_TWN	F	0:03:40.514-0:03:40.780	IT1	0.0735632	8	0.275585
Trial 1	1.1	S_TWN	F	0:03:40.780-0:03:41.046	IT1	0.0881353	8	0.330177
Trial 1	1.1	S_TWN	F	0:03:41.046-0:03:41.312	IT1	0.0590713	8	0.221295
Trial 1	1.1	S_TWN	F	0:03:41.312-0:03:41.578	IT1	0.0772444	8	0.289376
Trial 1	1.1	S_TWN	F	0:03:41.578-0:03:41.844	IT1	0.104532	8	0.391603
Trial 1	1.1	S_TWN	F	0:03:41.844-0:03:42.110	IT1	0.0654638	8	0.245244
Trial 1	1.1	S_TWN	F	0:03:42.110-0:03:42.376	IT1	0.0549461	8	0.205842
Trial 1	1.1	S_TWN	F	0:03:42.376-0:03:42.642	IT1	0.0436594	8	0.163558
Trial 1	1.1	S_TWN	F	0:03:42.642-0:03:42.908	IT1	0.124699	8	0.467153
Trial 1	1.1	S_TWN	F	0:03:42.908-0:03:43.174	IT1	0.042971	8	0.16098
Trial 1	1.1	S_TWN	F	0:03:43.174-0:03:43.440	IT1	0.102548	8	0.38417
Trial 1	1.1	S_TWN	F	0:03:43.440-0:03:43.706	IT1	0.117417	8	0.439874
Trial 1	1.1	S_TWN	F	0:03:43.706-0:03:43.972	IT1	0.0605862	8	0.22697
Trial 1	1.1	S_TWN	F	0:03:43.972-0:03:44.238	IT1	0.148104	8	0.554838
Trial 1	1.1	S_TWN	F	0:03:44.238-0:03:44.504	IT1	0.0320407	8	0.120033
Trial 1	1.1	S_TWN	F	0:03:44.504-0:03:44.770	IT1	0.0912105	8	0.341696
Trial 1	1.1	S_TWN	F	0:03:44.770-0:03:45.036	IT1	0.322693	8	1.20889
Trial 1	1.1	S_TWN	F	0:03:45.036-0:03:45.302	IT1	0.180566	8	0.676441
Trial 1	1.1	S_TWN	F	0:03:45.302-0:03:45.568	IT1	0.144833	8	0.542581
Trial 1	1.1	S_TWN	F	0:03:45.568-0:03:45.834	IT1	0.127157	8	0.476362
Trial 1	1.1	S_TWN	F	0:03:45.834-0:03:46.100	IT1	0.354192	8	1.32689
Trial 1	1.1	S_TWN	F	0:03:46.100-0:03:46.366	IT1	0.13123	8	0.491622
Trial 1	1.1	S_TWN	F	0:03:46.366-0:03:46.632	IT1	0.39939	8	1.49621
Trial 1	1.1	S_TWN	F	0:03:46.632-0:03:46.898	IT1	0.127652	8	0.478215
Trial 1	1.1	S_TWN	F	0:03:46.898-0:03:47.164	IT1	0.0648802	8	0.243057
Trial 1	1.1	S_TWN	F	0:03:47.164-0:03:47.430	IT1	0.0757338	8	0.283716
Trial 1	1.1	S_TWN	F	0:03:47.430-0:03:47.696	IT1	0.128351	8	0.480834
Trial 1	1.1	S_TWN	F	0:03:47.696-0:03:47.962	IT1	0.0581803	8	0.217957
Trial 1	1.1	S_TWN	F	0:03:47.962-0:03:48.228	IT1	0.0326978	7	0.139994
Trial 1	1.1	S_TWN	F	0:03:48.228-0:03:48.494	IT1	0.0614203	8	0.230096
Trial 1	1.1	S_TWN	F	0:03:48.494-0:03:48.760	IT1	0.0353903	8	0.132582
Trial 1	1.1	S_TWN	F	0:03:48.760-0:03:49.026	IT1	0.0479085	8	0.179476
Trial 1	1.1	S_TWN	F	0:03:49.026-0:03:49.292	IT1	0.383931	8	1.4383
Trial 1	1.1	S_TWN	F	0:03:49.292-0:03:49.558	IT1	0.130775	8	0.489916
Trial 1	1.1	S_TWN	F	0:03:49.558-0:03:49.824	IT1	0.0768192	8	0.287785
Trial 1	1.1	S_TWN	F	0:03:49.824-0:03:50.090	IT1	0.127485	8	0.477595
Trial 1	1.1	S_TWN	F	0:03:50.090-0:03:50.356	IT1	0.0807178	8	0.302388
Trial 1	1.1	S_TWN	F	0:03:50.356-0:03:50.622	IT1	0.0559921	8	0.20976
Trial 1	1.1	S_TWN	F	0:03:50.622-0:03:50.888	IT1	0.0949361	8	0.355654
Trial 1	1.1	S_TWN	F	0:03:50.888-0:03:51.154	IT1	0.0353452	8	0.132412
Trial 1	1.1	S_TWN	F	0:03:51.154-0:03:51.420	IT1	0.0776803	8	0.291009
Trial 1	1.1	S_TWN	F	0:03:51.420-0:03:51.686	IT1	0.0627552	8	0.235096
Trial 1	1.1	S_TWN	F	0:03:51.686-0:03:51.952	IT1	0.0696567	8	0.260951
Trial 1	1.1	S_TWN	F	0:03:51.952-0:03:52.218	IT1	0.0617713	8	0.231409
Trial 1	1.1	S_TWN	F	0:03:52.218-0:03:52.484	IT1	0.0643907	8	0.241223
Trial 1	1.1	S_TWN	F	0:03:52.484-0:03:52.750	IT1	0.0435774	8	0.163251
Trial 1	1.1	S_TWN	F	0:03:52.750-0:03:53.016	IT1	0.0309897	8	0.116095
Trial 1	1.1	S_TWN	F	0:03:53.016-0:03:53.282	IT1	0.069443	8	0.260153
Trial 1	1.1	S_TWN	F	0:03:53.282-0:03:53.548	IT1	0.0606246	8	0.227115
Trial 1	1.1	S_TWN	F	0:03:53.548-0:03:53.814	IT1	0.140955	8	0.528053
Trial 1	1.1	S_TWN	F	0:03:53.814-0:03:54.080	IT1	0.101385	8	0.379811
Trial 1	1.1	S_TWN	F	0:03:54.080-0:03:54.346	IT1	0.217144	8	0.81347
Trial 1	1.1	S_TWN	F	0:03:54.346-0:03:54.612	IT1	0.166944	8	0.625412
Trial 1	1.1	S_TWN	F	0:03:54.612-0:03:54.878	IT1	0.260315	8	0.975199
Trial 1	1.1	S_TWN	F	0:03:54.878-0:03:55.144	IT1	0.0810808	8	0.30375
Trial 1	1.1	S_TWN	F	0:03:55.144-0:03:55.410	IT1	0.0403395	8	0.151122
Trial 1	1.1	S_TWN	F	0:03:55.410-0:03:55.676	IT1	0.0509726	8	0.190955
Trial 1	1.1	S_TWN	F	0:03:55.676-0:03:55.942	IT1	0.0243617	8	0.0912655
Trial 1	1.1	S_TWN	F	0:03:55.942-0:03:56.208	IT1	0.0447985	8	0.167827
Trial 1	1.1	S_TWN	F	0:03:56.208-0:03:56.474	IT1	0.0237649	8	0.0890294
Trial 1	1.1	S_TWN	F	0:03:56.474-0:03:56.740	IT1	0.0600021	8	0.224782
Trial 1	1.1	S_TWN	F	0:03:56.740-0:03:57.006	IT1	0.0179247	8	0.0671502
Trial 1	1.1	S_TWN	F	0:03:57.006-0:03:57.272	IT1	0.0427602	8	0.160191
Trial 1	1.1	S_TWN	F	0:03:57.272-0:03:57.538	IT1	0.0536363	8	0.200934
Trial 1	1.1	S_TWN	F	0:03:57.538-0:03:57.804	IT1	0.0130637	7	0.0559317
Trial 1	1.1	S_TWN	F	0:03:57.804-0:03:58.070	IT1	0.0395809	8	0.14828
Trial 1	1.1	S_TWN	F	0:03:58.070-0:03:58.336	IT1	0.0159952	8	0.059922
Trial 1	1.1	S_TWN	F	0:03:58.336-0:03:58.602	IT1	0.0313445	8	0.117424
Trial 1	1.1	S_TWN	F	0:03:58.602-0:03:58.868	IT1	0.0264355	8	0.0990342
Trial 1	1.1	S_TWN	F	0:03:58.868-0:03:59.134	IT1	0.0476698	8	0.178584
Trial 1	1.1	S_TWN	F	0:03:59.134-0:03:59.400	IT1	0.0321317	8	0.120375
Trial 1	1.1	S_TWN	F	0:03:59.400-0:03:59.666	IT1	0.0229685	8	0.0860453
Trial 1	1.1	S_TWN	F	0:03:59.666-0:03:59.932	IT1	0.0273389	8	0.102418
Trial 1	1.1	S_TWN	F	0:03:59.932-0:04:00.198	IT1	0.0537099	8	0.201212
Trial 1	1.1	S_TWN	F	0:04:00.198-0:04:00.464	IT1	0.0448589	8	0.168053
Trial 1	1.1	S_TWN	F	0:04:00.464-0:04:00.730	IT1	0.044488	8	0.166664
Trial 1	1.1	S_TWN	F	0:04:00.730-0:04:00.996	IT1	0.0581155	8	0.217714
Trial 1	1.1	S_TWN	F	0:04:00.996-0:04:01.262	IT1	0.0490747	8	0.183846
Trial 1	1.1	S_TWN	F	0:04:01.262-0:04:01.528	IT1	0.0339364	8	0.127135
Trial 1	1.1	S_TWN	F	0:04:01.528-0:04:01.794	IT1	0.0506659	8	0.189807
Trial 1	1.1	S_TWN	F	0:04:01.794-0:04:02.060	IT1	0.0410959	8	0.153956
Trial 1	1.1	S_TWN	F	0:04:02.060-0:04:02.326	IT1	0.0969936	8	0.363362
Trial 1	1.1	S_TWN	F	0:04:02.326-0:04:02.592	IT1	0.0469235	8	0.175787
Trial 1	1.1	S_TWN	F	0:04:02.592-0:04:02.858	IT1	0.0752536	8	0.281919
Trial 1	1.1	S_TWN	F	0:04:02.858-0:04:03.124	IT1	0.0276021	8	0.103404
Trial 1	1.1	S_TWN	F	0:04:03.124-0:04:03.390	IT1	0.0475299	8	0.178059
Trial 1	1.1	S_TWN	F	0:04:03.390-0:04:03.656	IT1	0.034851	8	0.13056
Trial 1	1.1	S_TWN	F	0:04:03.656-0:04:03.922	IT1	0.0534743	8	0.200327
Trial 1	1.1	S_TWN	F	0:04:03.922-0:04:04.188	IT1	0.0265059	8	0.0992984
Trial 1	1.1	S_TWN	F	0:04:04.188-0:04:04.454	IT1	0.0477254	8	0.178791
Trial 1	1.1	S_TWN	F	0:04:04.454-0:04:04.720	IT1	0.0346669	8	0.129872
Trial 1	1.1	S_TWN	F	0:04:04.720-0:04:04.986	IT1	0.0502364	8	0.188197
Trial 1	1.1	S_TWN	F	0:04:04.986-0:04:05.252	IT1	0.0489436	8	0.183356
Trial 1	1.1	S_TWN	F	0:04:05.252-0:04:05.518	IT1	0.0358659	8	0.134363
Trial 1	1.1	S_TWN	F	0:04:05.518-0:04:05.784	IT1	0.0378908	8	0.141949
Trial 1	1.1	S_TWN	F	0:04:05.784-0:04:06.050	IT1	0.030291	8	0.113479
Trial 1	1.1	S_TWN	F	0:04:06.050-0:04:06.316	IT1	0.0378484	8	0.141789
Trial 1	1.1	S_TWN	F	0:04:06.316-0:04:06.582	IT1	0.0345416	8	0.129401
Trial 1	1.1	S_TWN	F	0:04:06.582-0:04:06.848	IT1	0.0150358	8	0.0563278
Trial 1	1.1	S_TWN	F	0:04:06.848-0:04:07.114	IT1	0.0521468	8	0.195356
Trial 1	1.1	S_TWN	F	0:04:07.114-0:04:07.380	IT1	0.0398598	7	0.170657
Trial 1	1.1	S_TWN	F	0:04:07.380-0:04:07.646	IT1	0.0430766	8	0.161375
Trial 1	1.1	S_TWN	F	0:04:07.646-0:04:07.912	IT1	0.036243	8	0.135775
Trial 1	1.1	S_TWN	F	0:04:07.912-0:04:08.178	IT1	0.0396359	8	0.148486
Trial 1	1.1	S_TWN	F	0:04:08.178-0:04:08.444	IT1	0.0417973	8	0.156583
Trial 1	1.1	S_TWN	F	0:04:08.444-0:04:08.710	IT1	0.0643474	8	0.24106
Trial 1	1.1	S_TWN	F	0:04:08.710-0:04:08.976	IT1	0.0510731	8	0.191333
Trial 1	1.1	S_TWN	F	0:04:08.976-0:04:09.242	IT1	0.0206016	8	0.0771784
Trial 1	1.1	S_TWN	F	0:04:09.242-0:04:09.508	IT1	0.0465207	8	0.174277
Trial 1	1.1	S_TWN	F	0:04:09.508-0:04:09.774	IT1	0.0175902	8	0.0658976
Trial 1	1.1	S_TWN	F	0:04:09.774-0:04:10.040	IT1	0.0400645	8	0.150091
Trial 1	1.1	S_TWN	F	0:04:10.040-0:04:10.306	IT1	0.0193171	8	0.0723667
Trial 1	1.1	S_TWN	F	0:04:10.306-0:04:10.572	IT1	0.0391124	8	0.146524
Trial 1	1.1	S_TWN	F	0:04:10.572-0:04:10.838	IT1	0.0264028	8	0.0989113
Trial 1	1.1	S_TWN	F	0:04:10.838-0:04:11.104	IT1	0.0357076	8	0.13377
Trial 1	1.1	S_TWN	F	0:04:11.104-0:04:11.370	IT1	0.0356211	8	0.133445
Trial 1	1.1	S_TWN	F	0:04:11.370-0:04:11.636	IT1	0.0363978	8	0.136355
Trial 1	1.1	S_TWN	F	0:04:11.636-0:04:11.902	IT1	0.0588232	8	0.220366
Trial 1	1.1	S_TWN	F	0:04:11.902-0:04:12.168	IT1	0.0339981	8	0.127365
Trial 1	1.1	S_TWN	F	0:04:12.168-0:04:12.434	IT1	0.0671591	8	0.251593
Trial 1	1.1	S_TWN	F	0:04:12.434-0:04:12.700	IT1	0.0426979	8	0.159957
Trial 1	1.1	S_TWN	F	0:04:12.700-0:04:12.966	IT1	0.203555	8	0.762565
Trial 1	1.1	S_TWN	F	0:04:12.966-0:04:13.232	IT1	0.182856	8	0.685022
Trial 1	1.1	S_TWN	F	0:04:13.232-0:04:13.498	IT1	0.17201	8	0.644392
Trial 1	1.1	S_TWN	F	0:04:13.498-0:04:13.764	IT1	0.19704	8	0.738158
Trial 1	1.1	S_TWN	F	0:04:13.764-0:04:14.030	IT1	0.0360404	8	0.135016
Trial 1	1.1	S_TWN	F	0:04:14.030-0:04:14.296	IT1	0.0473708	8	0.177464
Trial 1	1.1	S_TWN	F	0:04:14.296-0:04:14.562	IT1	0.0192418	8	0.0720844
Trial 1	1.1	S_TWN	F	0:04:14.562-0:04:14.828	IT1	0.065765	8	0.246372
Trial 1	1.1	S_TWN	F	0:04:14.828-0:04:15.094	IT1	0.0448922	8	0.168177
Trial 1	1.1	S_TWN	F	0:04:15.094-0:04:15.360	IT1	0.0485801	8	0.181995
Trial 1	1.1	S_TWN	F	0:04:15.360-0:04:15.626	IT1	0.0338749	8	0.126905
Trial 1	1.1	S_TWN	F	0:04:15.626-0:04:15.892	IT1	0.0397938	8	0.149077
Trial 1	1.1	S_TWN	F	0:04:15.892-0:04:16.158	IT1	0.0483532	8	0.181144
Trial 1	1.1	S_TWN	F	0:04:16.158-0:04:16.424	IT1	0.0381978	8	0.143098
Trial 1	1.1	S_TWN	F	0:04:16.424-0:04:16.690	IT1	0.0692092	7	0.296314
Trial 1	1.1	S_TWN	F	0:04:16.690-0:04:16.956	IT1	0.0281267	8	0.10537
Trial 1	1.1	S_TWN	F	0:04:16.956-0:04:17.222	IT1	0.0397851	8	0.149046
Trial 1	1.1	S_TWN	F	0:04:17.222-0:04:17.488	IT1	0.0168981	8	0.0633043
Trial 1	1.1	S_TWN	F	0:04:17.488-0:04:17.754	IT1	0.0486737	8	0.182344
Trial 1	1.1	S_TWN	F	0:04:17.754-0:04:18.020	IT1	0.0269561	8	0.100984
Trial 1	1.1	S_TWN	F	0:04:18.020-0:04:18.286	IT1	0.0469974	8	0.176063
Trial 1	1.1	S_TWN	F	0:04:18.286-0:04:18.552	IT1	0.0807314	8	0.30244
Trial 1	1.1	S_TWN	F	0:04:18.552-0:04:18.818	IT1	0.0304757	8	0.114169
Trial 1	1.1	S_TWN	F	0:04:18.818-0:04:19.084	IT1	0.0851436	8	0.318968
Trial 1	1.1	S_TWN	F	0:04:19.084-0:04:19.350	IT1	0.0484866	8	0.181642
Trial 1	1.1	S_TWN	F	0:04:19.350-0:04:19.616	IT1	0.0678591	8	0.254216
Trial 1	1.1	S_TWN	F	0:04:19.616-0:04:19.882	IT1	0.02226	8	0.0833919
Trial 1	1.1	S_TWN	F	0:04:19.882-0:04:20.148	IT1	0.0527717	8	0.197696
Trial 1	1.1	S_TWN	F	0:04:20.148-0:04:20.414	IT1	0.0301494	8	0.112948
Trial 1	1.1	S_TWN	F	0:04:20.414-0:04:20.680	IT1	0.0291444	8	0.109182
Trial 1	1.1	S_TWN	F	0:04:20.680-0:04:20.946	IT1	0.0394842	8	0.147918
Trial 1	1.1	S_TWN	F	0:04:20.946-0:04:21.212	IT1	0.0223419	8	0.0836981
Trial 1	1.1	S_TWN	F	0:04:21.212-0:04:21.478	IT1	0.0375706	8	0.140749
Trial 1	1.1	S_TWN	F	0:04:21.478-0:04:21.744	IT1	0.0229597	8	0.0860125
Trial 1	1.1	S_TWN	F	0:04:21.744-0:04:22.010	IT1	0.0476005	8	0.178323
Trial 1	1.1	S_TWN	F	0:04:22.010-0:04:22.276	IT1	0.0361524	8	0.135436
Trial 1	1.1	S_TWN	F	0:04:22.276-0:04:22.542	IT1	0.0462434	8	0.173238
Trial 1	1.1	S_TWN	F	0:04:22.542-0:04:22.808	IT1	0.0624397	8	0.233913
Trial 1	1.1	S_TWN	F	0:04:22.808-0:04:23.074	IT1	0.0492406	8	0.184469
Trial 1	1.1	S_TWN	F	0:04:23.074-0:04:23.340	IT1	0.275959	8	1.03381
Trial 1	1.1	S_TWN	F	0:04:23.340-0:04:23.606	IT1	0.0752915	8	0.282061
Trial 1	1.1	S_TWN	F	0:04:23.606-0:04:23.872	IT1	0.0698693	8	0.261747
Trial 1	1.1	S_TWN	F	0:04:23.872-0:04:24.138	IT1	0.037714	8	0.141285
Trial 1	1.1	S_TWN	F	0:04:24.138-0:04:24.404	IT1	0.0700942	8	0.26259
Trial 1	1.1	S_TWN	F	0:04:24.404-0:04:24.670	IT1	0.0605259	8	0.226745
Trial 1	1.1	S_TWN	F	0:04:24.670-0:04:24.936	IT1	0.0349664	8	0.130992
Trial 1	1.1	S_TWN	F	0:04:24.936-0:04:25.202	IT1	0.043543	8	0.163123
Trial 1	1.1	S_TWN	F	0:04:25.202-0:04:25.468	IT1	0.0281149	8	0.105326
Trial 1	1.1	S_TWN	F	0:04:25.468-0:04:25.734	IT1	0.0369444	8	0.138405
Trial 1	1.1	S_TWN	F	0:04:25.734-0:04:26.000	IT1	0.0296361	8	0.111025
Trial 1	1.1	S_TWN	F	0:04:26.000-0:04:26.266	IT1	0.065027	7	0.27841
Trial 1	1.1	S_TWN	F	0:04:26.266-0:04:26.532	IT1	0.0309678	8	0.116013
Trial 1	1.1	S_TWN	F	0:04:26.532-0:04:26.798	IT1	0.0360993	8	0.135236
Trial 1	1.1	S_TWN	F	0:04:26.798-0:04:27.064	IT1	0.0130173	8	0.048766
Trial 1	1.1	S_TWN	F	0:04:27.064-0:04:27.330	IT1	0.0261582	8	0.0979954
Trial 1	1.1	S_TWN	F	0:04:27.330-0:04:27.596	IT1	0.0520772	8	0.195093
Trial 1	1.1	S_TWN	F	0:04:27.596-0:04:27.862	IT1	0.0381873	8	0.14306
Trial 1	1.1	S_TWN	F	0:04:27.862-0:04:28.128	IT1	0.0745947	8	0.279451
Trial 1	1.1	S_TWN	F	0:04:28.128-0:04:28.394	IT1	0.0312499	8	0.11707
Trial 1	1.1	S_TWN	F	0:04:28.394-0:04:28.660	IT1	0.080531	8	0.301689
Trial 1	1.1	S_TWN	F	0:04:28.660-0:04:28.926	IT1	0.0283788	8	0.106314
Trial 1	1.1	S_TWN	F	0:04:28.926-0:04:29.192	IT1	0.0516819	8	0.193614
Trial 1	1.1	S_TWN	F	0:04:29.192-0:04:29.458	IT1	0.0294799	8	0.110439
Trial 1	1.1	S_TWN	F	0:04:29.458-0:04:29.724	IT1	0.0544487	8	0.203977
Trial 1	1.1	S_TWN	F	0:04:29.724-0:04:29.990	IT1	0.0656072	8	0.245781
Trial 1	1.1	S_TWN	F	0:04:29.990-0:04:30.256	IT1	0.0514678	8	0.19281
Trial 1	1.1	S_TWN	F	0:04:30.256-0:04:30.522	CS2a	0.0814298	8	0.305056
Trial 1	1.1	S_TWN	F	0:04:30.522-0:04:30.788	CS2a	0.0613376	8	0.229785
Trial 1	1.1	S_TWN	F	0:04:30.788-0:04:31.054	CS2a	0.0874603	8	0.327647
Trial 1	1.1	S_TWN	F	0:04:31.054-0:04:31.320	CS2a	0.0406071	8	0.152125
Trial 1	1.1	S_TWN	F	0:04:31.320-0:04:31.586	CS2a	0.0566757	8	0.21232
Trial 1	1.1	S_TWN	F	0:04:31.586-0:04:31.852	CS2a	0.0388088	8	0.145388
Trial 1	1.1	S_TWN	F	0:04:31.852-0:04:32.118	CS2a	0.0382743	8	0.143385
Trial 1	1.1	S_TWN	F	0:04:32.118-0:04:32.384	CS2a	0.0454566	8	0.170291
Trial 1	1.1	S_TWN	F	0:04:32.384-0:04:32.650	CS2a	0.0329221	8	0.123335
Trial 1	1.1	S_TWN	F	0:04:32.650-0:04:32.916	CS2a	0.0510577	8	0.191276
Trial 1	1.1	S_TWN	F	0:04:32.916-0:04:33.182	CS2a	0.0183034	8	0.0685694
Trial 1	1.1	S_TWN	F	0:04:33.182-0:04:33.448	CS2a	0.0380497	8	0.142544
Trial 1	1.1	S_TWN	F	0:04:33.448-0:04:33.714	CS2a	0.0105239	8	0.0394248
Trial 1	1.1	S_TWN	F	0:04:33.714-0:04:33.980	CS2a	0.0780255	8	0.292303
Trial 1	1.1	S_TWN	F	0:04:33.980-0:04:34.246	CS2a	0.0368349	8	0.137993
Trial 1	1.1	S_TWN	F	0:04:34.246-0:04:34.512	CS2a	0.0391499	8	0.146666
Trial 1	1.1	S_TWN	F	0:04:34.512-0:04:34.778	CS2a	0.051519	8	0.193003
Trial 1	1.1	S_TWN	F	0:04:34.778-0:04:35.044	CS2a	0.0396642	8	0.148592
Trial 1	1.1	S_TWN	F	0:04:35.044-0:04:35.310	CS2a	0.0660929	8	0.247601
Trial 1	1.1	S_TWN	F	0:04:35.310-0:04:35.576	CS2a	0.0284933	8	0.106743
Trial 1	1.1	S_TWN	F	0:04:35.576-0:04:35.842	CS2a	0.0417895	7	0.178919
Trial 1	1.1	S_TWN	F	0:04:35.842-0:04:36.108	CS2a	0.0221804	8	0.0830936
Trial 1	1.1	S_TWN	F	0:04:36.108-0:04:36.374	CS2a	0.0564802	8	0.211588
Trial 1	1.1	S_TWN	F	0:04:36.374-0:04:36.640	CS2a	0.0318659	8	0.119377
Trial 1	1.1	S_TWN	F	0:04:36.640-0:04:36.906	CS2a	0.0266961	8	0.10001
Trial 1	1.1	S_TWN	F	0:04:36.906-0:04:37.172	CS2a	0.0350918	8	0.131462
Trial 1	1.1	S_TWN	F	0:04:37.172-0:04:37.438	CS2a	0.021747	8	0.0814702
Trial 1	1.1	S_TWN	F	0:04:37.438-0:04:37.704	CS2a	0.0678522	8	0.254191
Trial 1	1.1	S_TWN	F	0:04:37.704-0:04:37.970	CS2a	0.0232034	8	0.0869256
Trial 1	1.1	S_TWN	F	0:04:37.970-0:04:38.236	CS2a	0.0733345	8	0.274731
Trial 1	1.1	S_TWN	F	0:04:38.236-0:04:38.502	CS2a	0.0286735	8	0.107418
Trial 1	1.1	S_TWN	F	0:04:38.502-0:04:38.768	CS2a	0.0639611	8	0.239615
Trial 1	1.1	S_TWN	F	0:04:38.768-0:04:39.034	CS2a	0.0355955	8	0.133349
Trial 1	1.1	S_TWN	F	0:04:39.034-0:04:39.300	CS2a	0.0351288	8	0.1316
Trial 1	1.1	S_TWN	F	0:04:39.300-0:04:39.566	CS2a	0.0456533	8	0.171029
Trial 1	1.1	S_TWN	F	0:04:39.566-0:04:39.832	CS2a	0.0309852	8	0.116078
Trial 1	1.1	S_TWN	F	0:04:39.832-0:04:40.098	CS2a	0.0605922	8	0.226993
Trial 1	1.1	S_TWN	F	0:04:40.098-0:04:40.364	CS2b	0.682448	8	2.55661
Trial 1	1.1	S_TWN	F	0:04:40.364-0:04:40.630	CS2b	0.919744	8	3.4456
Trial 1	1.1	S_TWN	F	0:04:40.630-0:04:40.896	CS2b	0.539153	8	2.01981
Trial 1	1.1	S_TWN	F	0:04:40.896-0:04:41.162	CS2b	0.232603	8	0.871388
Trial 1	1.1	S_TWN	F	0:04:41.162-0:04:41.428	CS2b	0.341251	8	1.27841
Trial 1	1.1	S_TWN	F	0:04:41.428-0:04:41.694	CS2b	0.168059	8	0.629589
Trial 1	1.1	S_TWN	F	0:04:41.694-0:04:41.960	CS2b	0.175147	8	0.656144
Trial 1	1.1	S_TWN	F	0:04:41.960-0:04:42.226	CS2b	0.263562	8	0.987376
Trial 1	1.1	S_TWN	F	0:04:42.226-0:04:42.492	CS2b	0.18986	8	0.711266
Trial 1	1.1	S_TWN	F	0:04:42.492-0:04:42.758	CS2b	0.118902	8	0.445435
Trial 1	1.1	S_TWN	F	0:04:42.758-0:04:43.024	CS2b	1.27326	8	4.76994
Trial 1	1.1	S_TWN	F	0:04:43.024-0:04:43.290	CS2b	0.611666	8	2.29146
Trial 1	1.1	S_TWN	F	0:04:43.290-0:04:43.556	CS2b	0.230666	8	0.864134
Trial 1	1.1	S_TWN	F	0:04:43.556-0:04:43.822	CS2b	0.071034	8	0.266111
Trial 1	1.1	S_TWN	F	0:04:43.822-0:04:44.088	CS2b	0.071034	8	0.266112
Trial 1	1.1	S_TWN	F	0:04:44.088-0:04:44.354	CS2b	0.071034	8	0.266111
Trial 1	1.1	S_TWN	F	0:04:44.354-0:04:44.620	CS2b	0.0937991	8	0.351397
Trial 1	1.1	S_TWN	F	0:04:44.620-0:04:44.886	CS2b	0.027242	8	0.102056
Trial 1	1.1	S_TWN	F	0:04:44.886-0:04:45.152	CS2b	0.027242	8	0.102055
Trial 1	1.1	S_TWN	F	0:04:45.152-0:04:45.418	CS2b	0.0238368	7	0.102055
Trial 1	1.1	S_TWN	F	0:04:45.418-0:04:45.684	CS2b	0.027242	8	0.102056
Trial 1	1.1	S_TWN	F	0:04:45.684-0:04:45.950	CS2b	0.513386	8	1.92327
Trial 1	1.1	S_TWN	F	0:04:45.950-0:04:46.216	CS2b	0.391866	8	1.46803
Trial 1	1.1	S_TWN	F	0:04:46.216-0:04:46.482	CS2b	0.162254	8	0.607842
Trial 1	1.1	S_TWN	F	0:04:46.482-0:04:46.748	CS2b	0.162254	8	0.607842
Trial 1	1.1	S_TWN	F	0:04:46.748-0:04:47.014	CS2b	0.162254	8	0.607844
Trial 1	1.1	S_TWN	F	0:04:47.014-0:04:47.280	CS2b	0.162254	8	0.607842
Trial 1	1.1	S_TWN	F	0:04:47.280-0:04:47.546	CS2b	0.162254	8	0.607844
Trial 1	1.1	S_TWN	F	0:04:47.546-0:04:47.812	CS2b	0.162254	8	0.607842
Trial 1	1.1	S_TWN	F	0:04:47.812-0:04:48.078	CS2b	0.338906	8	1.26962
Trial 1	1.1	S_TWN	F	0:04:48.078-0:04:48.344	CS2b	0.105833	8	0.396478
Trial 1	1.1	S_TWN	F	0:04:48.344-0:04:48.610	CS2b	0.105833	8	0.396477
Trial 1	1.1	S_TWN	F	0:04:48.610-0:04:48.876	CS2b	1.52395	8	5.70912
Trial 1	1.1	S_TWN	F	0:04:48.876-0:04:49.142	CS2b	1.19209	8	4.46586
Trial 1	1.1	S_TWN	F	0:04:49.142-0:04:49.408	CS2b	0.803246	8	3.00915
Trial 1	1.1	S_TWN	F	0:04:49.408-0:04:49.674	CS2b	0.643697	8	2.41146
Trial 1	1.1	S_TWN	F	0:04:49.674-0:04:49.940	CS2b	0.327776	8	1.22792
Trial 1	1.1	S_TWN	F	0:04:49.940-0:04:50.206	CS2b	0.161237	8	0.604034
Trial 1	1.1	S_TWN	F	0:04:50.206-0:04:50.472	ITI2	0.114702	8	0.429704
Trial 1	1.1	S_TWN	F	0:04:50.472-0:04:50.738	ITI2	0.165533	8	0.620123
Trial 1	1.1	S_TWN	F	0:04:50.738-0:04:51.004	ITI2	0.171424	8	0.642195
Trial 1	1.1	S_TWN	F	0:04:51.004-0:04:51.270	ITI2	0.0569736	8	0.213437
Trial 1	1.1	S_TWN	F	0:04:51.270-0:04:51.536	ITI2	0.161795	8	0.606129
Trial 1	1.1	S_TWN	F	0:04:51.536-0:04:51.802	ITI2	0.0725081	8	0.271634
Trial 1	1.1	S_TWN	F	0:04:51.802-0:04:52.068	ITI2	0.234278	8	0.877663
Trial 1	1.1	S_TWN	F	0:04:52.068-0:04:52.334	ITI2	0.119176	8	0.446461
Trial 1	1.1	S_TWN	F	0:04:52.334-0:04:52.600	ITI2	0.0841611	8	0.315287
Trial 1	1.1	S_TWN	F	0:04:52.600-0:04:52.866	ITI2	0.0333464	8	0.124924
Trial 1	1.1	S_TWN	F	0:04:52.866-0:04:53.132	ITI2	0.0619435	8	0.232056
Trial 1	1.1	S_TWN	F	0:04:53.132-0:04:53.398	ITI2	0.0525841	8	0.196994
Trial 1	1.1	S_TWN	F	0:04:53.398-0:04:53.664	ITI2	0.0619237	8	0.231982
Trial 1	1.1	S_TWN	F	0:04:53.664-0:04:53.930	ITI2	0.114138	8	0.427588
Trial 1	1.1	S_TWN	F	0:04:53.930-0:04:54.196	ITI2	0.147329	8	0.551934
Trial 1	1.1	S_TWN	F	0:04:54.196-0:04:54.462	ITI2	0.178347	8	0.668134
Trial 1	1.1	S_TWN	F	0:04:54.462-0:04:54.728	ITI2	0.0495079	7	0.211965
Trial 1	1.1	S_TWN	F	0:04:54.728-0:04:54.994	ITI2	0.125718	8	0.470969
Trial 1	1.1	S_TWN	F	0:04:54.994-0:04:55.260	ITI2	0.0461402	8	0.172854
Trial 1	1.1	S_TWN	F	0:04:55.260-0:04:55.526	ITI2	0.0863721	8	0.32357
Trial 1	1.1	S_TWN	F	0:04:55.526-0:04:55.792	ITI2	0.131584	8	0.492946
Trial 1	1.1	S_TWN	F	0:04:55.792-0:04:56.058	ITI2	0.0472843	8	0.177138
Trial 1	1.1	S_TWN	F	0:04:56.058-0:04:56.324	ITI2	0.188659	8	0.706767
Trial 1	1.1	S_TWN	F	0:04:56.324-0:04:56.590	ITI2	0.0411579	8	0.154189
Trial 1	1.1	S_TWN	F	0:04:56.590-0:04:56.856	ITI2	0.0425357	8	0.15935
Trial 1	1.1	S_TWN	F	0:04:56.856-0:04:57.122	ITI2	0.0301036	8	0.112776
Trial 1	1.1	S_TWN	F	0:04:57.122-0:04:57.388	ITI2	0.129564	8	0.485379
Trial 1	1.1	S_TWN	F	0:04:57.388-0:04:57.654	ITI2	0.0908015	8	0.340164
Trial 1	1.1	S_TWN	F	0:04:57.654-0:04:57.920	ITI2	0.0769068	8	0.288111
Trial 1	1.1	S_TWN	F	0:04:57.920-0:04:58.186	ITI2	0.044998	8	0.168574
Trial 1	1.1	S_TWN	F	0:04:58.186-0:04:58.452	ITI2	0.0600967	8	0.225137
Trial 1	1.1	S_TWN	F	0:04:58.452-0:04:58.718	ITI2	0.134983	8	0.505678
Trial 1	1.1	S_TWN	F	0:04:58.718-0:04:58.984	ITI2	0.07205	8	0.269917
Trial 1	1.1	S_TWN	F	0:04:58.984-0:04:59.250	ITI2	0.169051	8	0.633313
Trial 1	1.1	S_TWN	F	0:04:59.250-0:04:59.516	ITI2	0.0296696	8	0.11115
Trial 1	1.1	S_TWN	F	0:04:59.516-0:04:59.782	ITI2	0.0926294	8	0.347015
Trial 1	1.1	S_TWN	F	0:04:59.782-0:05:00.048	ITI2	0.145848	8	0.546379
Trial 1	1.1	S_TWN	F	0:05:00.048-0:05:00.314	ITI2	0.0936141	8	0.350699
Trial 1	1.1	S_TWN	F	0:05:00.314-0:05:00.580	ITI2	0.0991963	8	0.371613
Trial 1	1.1	S_TWN	F	0:05:00.580-0:05:00.846	ITI2	0.0297096	8	0.111299
Trial 1	1.1	S_TWN	F	0:05:00.846-0:05:01.112	ITI2	0.0276877	8	0.103725
Trial 1	1.1	S_TWN	F	0:05:01.112-0:05:01.378	ITI2	0.0982688	8	0.368139
Trial 1	1.1	S_TWN	F	0:05:01.378-0:05:01.644	ITI2	0.108159	8	0.40519
Trial 1	1.1	S_TWN	F	0:05:01.644-0:05:01.910	ITI2	0.13282	8	0.497576
Trial 1	1.1	S_TWN	F	0:05:01.910-0:05:02.176	ITI2	0.112731	8	0.422317
Trial 1	1.1	S_TWN	F	0:05:02.176-0:05:02.442	ITI2	0.0820847	8	0.30751
Trial 1	1.1	S_TWN	F	0:05:02.442-0:05:02.708	ITI2	0.111992	8	0.419547
Trial 1	1.1	S_TWN	F	0:05:02.708-0:05:02.974	ITI2	0.0780837	8	0.292521
Trial 1	1.1	S_TWN	F	0:05:02.974-0:05:03.240	ITI2	0.0956982	8	0.35851
Trial 1	1.1	S_TWN	F	0:05:03.240-0:05:03.506	ITI2	0.0553874	8	0.207494
Trial 1	1.1	S_TWN	F	0:05:03.506-0:05:03.772	ITI2	0.0409825	8	0.153531
Trial 1	1.1	S_TWN	F	0:05:03.772-0:05:04.038	ITI2	0.102582	8	0.384297
Trial 1	1.1	S_TWN	F	0:05:04.038-0:05:04.304	ITI2	0.144864	7	0.620224
Trial 1	1.1	S_TWN	F	0:05:04.304-0:05:04.570	ITI2	0.134037	8	0.502135
Trial 1	1.1	S_TWN	F	0:05:04.570-0:05:04.836	ITI2	0.0973766	8	0.364795
Trial 1	1.1	S_TWN	F	0:05:04.836-0:05:05.102	ITI2	0.0282908	8	0.105984
Trial 1	1.1	S_TWN	F	0:05:05.102-0:05:05.368	ITI2	0.156921	8	0.587866
Trial 1	1.1	S_TWN	F	0:05:05.368-0:05:05.634	ITI2	0.0792278	8	0.296806
Trial 1	1.1	S_TWN	F	0:05:05.634-0:05:05.900	ITI2	0.0566937	8	0.212389
Trial 1	1.1	S_TWN	F	0:05:05.900-0:05:06.166	ITI2	0.0697106	8	0.261152
Trial 1	1.1	S_TWN	F	0:05:06.166-0:05:06.432	ITI2	0.083509	8	0.312844
Trial 1	1.1	S_TWN	F	0:05:06.432-0:05:06.698	ITI2	0.0498471	8	0.186739
Trial 1	1.1	S_TWN	F	0:05:06.698-0:05:06.964	ITI2	0.0586835	8	0.219842
Trial 1	1.1	S_TWN	F	0:05:06.964-0:05:07.230	ITI2	0.0296092	8	0.110924
Trial 1	1.1	S_TWN	F	0:05:07.230-0:05:07.496	ITI2	0.0316718	8	0.11865
Trial 1	1.1	S_TWN	F	0:05:07.496-0:05:07.762	ITI2	0.0581145	8	0.21771
Trial 1	1.1	S_TWN	F	0:05:07.762-0:05:08.028	ITI2	0.0471936	8	0.176798
Trial 1	1.1	S_TWN	F	0:05:08.028-0:05:08.294	ITI2	0.0573087	8	0.214693
Trial 1	1.1	S_TWN	F	0:05:08.294-0:05:08.560	ITI2	0.0263146	8	0.0985821
Trial 1	1.1	S_TWN	F	0:05:08.560-0:05:08.826	ITI2	0.0896289	8	0.335771
Trial 1	1.1	S_TWN	F	0:05:08.826-0:05:09.092	ITI2	0.0320243	8	0.119971
Trial 1	1.1	S_TWN	F	0:05:09.092-0:05:09.358	ITI2	0.0402354	8	0.150732
Trial 1	1.1	S_TWN	F	0:05:09.358-0:05:09.624	ITI2	0.0457361	8	0.171338
Trial 1	1.1	S_TWN	F	0:05:09.624-0:05:09.890	ITI2	0.0276894	8	0.103732
Trial 1	1.1	S_TWN	F	0:05:09.890-0:05:10.156	ITI2	0.0656347	8	0.245882
Trial 1	1.1	S_TWN	F	0:05:10.156-0:05:10.422	ITI2	0.0217922	8	0.081639
Trial 1	1.1	S_TWN	F	0:05:10.422-0:05:10.688	ITI2	0.0804348	8	0.30133
Trial 1	1.1	S_TWN	F	0:05:10.688-0:05:10.954	ITI2	0.0307167	8	0.115072
Trial 1	1.1	S_TWN	F	0:05:10.954-0:05:11.220	ITI2	0.0883841	8	0.331111
Trial 1	1.1	S_TWN	F	0:05:11.220-0:05:11.486	ITI2	0.0521259	8	0.195276
Trial 1	1.1	S_TWN	F	0:05:11.486-0:05:11.752	ITI2	0.0922241	8	0.345492
Trial 1	1.1	S_TWN	F	0:05:11.752-0:05:12.018	ITI2	0.0537801	8	0.201474
Trial 1	1.1	S_TWN	F	0:05:12.018-0:05:12.284	ITI2	0.0596215	8	0.223356
Trial 1	1.1	S_TWN	F	0:05:12.284-0:05:12.550	ITI2	0.160956	8	0.602979
Trial 1	1.1	S_TWN	F	0:05:12.550-0:05:12.816	ITI2	0.0455764	8	0.17074
Trial 1	1.1	S_TWN	F	0:05:12.816-0:05:13.082	ITI2	0.122522	8	0.458996
Trial 1	1.1	S_TWN	F	0:05:13.082-0:05:13.348	ITI2	0.0728589	8	0.27295
Trial 1	1.1	S_TWN	F	0:05:13.348-0:05:13.614	ITI2	0.105356	8	0.394687
Trial 1	1.1	S_TWN	F	0:05:13.614-0:05:13.880	ITI2	0.0995076	7	0.426033
Trial 1	1.1	S_TWN	F	0:05:13.880-0:05:14.146	ITI2	0.0552494	8	0.206979
Trial 1	1.1	S_TWN	F	0:05:14.146-0:05:14.412	ITI2	0.0608346	8	0.227901
Trial 1	1.1	S_TWN	F	0:05:14.412-0:05:14.678	ITI2	0.0801625	8	0.300308
Trial 1	1.1	S_TWN	F	0:05:14.678-0:05:14.944	ITI2	0.0987448	8	0.369922
Trial 1	1.1	S_TWN	F	0:05:14.944-0:05:15.210	ITI2	0.0419063	8	0.156991
Trial 1	1.1	S_TWN	F	0:05:15.210-0:05:15.476	ITI2	0.148047	8	0.554621
Trial 1	1.1	S_TWN	F	0:05:15.476-0:05:15.742	ITI2	0.0610417	8	0.228676
Trial 1	1.1	S_TWN	F	0:05:15.742-0:05:16.008	ITI2	0.119555	8	0.447881
Trial 1	1.1	S_TWN	F	0:05:16.008-0:05:16.274	ITI2	0.0624774	8	0.234057
Trial 1	1.1	S_TWN	F	0:05:16.274-0:05:16.540	ITI2	0.0722992	8	0.270849
Trial 1	1.1	S_TWN	F	0:05:16.540-0:05:16.806	ITI2	0.0660469	8	0.247428
Trial 1	1.1	S_TWN	F	0:05:16.806-0:05:17.072	ITI2	0.0316746	8	0.118661
Trial 1	1.1	S_TWN	F	0:05:17.072-0:05:17.338	ITI2	0.0908558	8	0.340371
Trial 1	1.1	S_TWN	F	0:05:17.338-0:05:17.604	ITI2	0.0396436	8	0.148515
Trial 1	1.1	S_TWN	F	0:05:17.604-0:05:17.870	ITI2	0.0974468	8	0.365058
Trial 1	1.1	S_TWN	F	0:05:17.870-0:05:18.136	ITI2	0.0317356	8	0.11889
Trial 1	1.1	S_TWN	F	0:05:18.136-0:05:18.402	ITI2	0.105718	8	0.396045
Trial 1	1.1	S_TWN	F	0:05:18.402-0:05:18.668	ITI2	0.107413	8	0.402395
Trial 1	1.1	S_TWN	F	0:05:18.668-0:05:18.934	ITI2	0.0811864	8	0.304145
Trial 1	1.1	S_TWN	F	0:05:18.934-0:05:19.200	ITI2	0.0912217	8	0.341738
Trial 1	1.1	S_TWN	F	0:05:19.200-0:05:19.466	ITI2	0.0580646	8	0.217524
Trial 1	1.1	S_TWN	F	0:05:19.466-0:05:19.732	ITI2	0.0986282	8	0.369484
Trial 1	1.1	S_TWN	F	0:05:19.732-0:05:19.998	ITI2	0.0338227	8	0.126708
Trial 1	1.1	S_TWN	F	0:05:19.998-0:05:20.264	ITI2	0.103661	8	0.38834
Trial 1	1.1	S_TWN	F	0:05:20.264-0:05:20.530	ITI2	0.0988219	8	0.370212
Trial 1	1.1	S_TWN	F	0:05:20.530-0:05:20.796	ITI2	0.138615	8	0.519286
Trial 1	1.1	S_TWN	F	0:05:20.796-0:05:21.062	ITI2	0.0838025	8	0.313944
Trial 1	1.1	S_TWN	F	0:05:21.062-0:05:21.328	ITI2	0.0715173	8	0.26792
Trial 1	1.1	S_TWN	F	0:05:21.328-0:05:21.594	ITI2	0.0982173	8	0.367949
Trial 1	1.1	S_TWN	F	0:05:21.594-0:05:21.860	ITI2	0.0695844	8	0.260681
Trial 1	1.1	S_TWN	F	0:05:21.860-0:05:22.126	ITI2	0.0851897	8	0.319141
Trial 1	1.1	S_TWN	F	0:05:22.126-0:05:22.392	ITI2	0.0827461	8	0.309987
Trial 1	1.1	S_TWN	F	0:05:22.392-0:05:22.658	ITI2	0.111411	8	0.417373
Trial 1	1.1	S_TWN	F	0:05:22.658-0:05:22.924	ITI2	0.0971733	8	0.364037
Trial 1	1.1	S_TWN	F	0:05:22.924-0:05:23.190	ITI2	0.0647951	8	0.242738
Trial 1	1.1	S_TWN	F	0:05:23.190-0:05:23.456	ITI2	0.0278418	7	0.119203
Trial 1	1.1	S_TWN	F	0:05:23.456-0:05:23.722	ITI2	0.0482698	8	0.180831
Trial 1	1.1	S_TWN	F	0:05:23.722-0:05:23.988	ITI2	0.127141	8	0.476303
Trial 1	1.1	S_TWN	F	0:05:23.988-0:05:24.254	ITI2	0.0267058	8	0.100047
Trial 1	1.1	S_TWN	F	0:05:24.254-0:05:24.520	ITI2	0.129907	8	0.486661
Trial 1	1.1	S_TWN	F	0:05:24.520-0:05:24.786	ITI2	0.0310374	8	0.116274
Trial 1	1.1	S_TWN	F	0:05:24.786-0:05:25.052	ITI2	0.141512	8	0.530139
Trial 1	1.1	S_TWN	F	0:05:25.052-0:05:25.318	ITI2	0.0185093	8	0.0693405
Trial 1	1.1	S_TWN	F	0:05:25.318-0:05:25.584	ITI2	0.0550337	8	0.20617
Trial 1	1.1	S_TWN	F	0:05:25.584-0:05:25.850	ITI2	0.0442884	8	0.165915
Trial 1	1.1	S_TWN	F	0:05:25.850-0:05:26.116	ITI2	0.0471817	8	0.176753
Trial 1	1.1	S_TWN	F	0:05:26.116-0:05:26.382	ITI2	0.100646	8	0.377047
Trial 1	1.1	S_TWN	F	0:05:26.382-0:05:26.648	ITI2	0.018885	8	0.0707475
Trial 1	1.1	S_TWN	F	0:05:26.648-0:05:26.914	ITI2	0.0613441	8	0.22981
Trial 1	1.1	S_TWN	F	0:05:26.914-0:05:27.180	ITI2	0.0398813	8	0.149406
Trial 1	1.1	S_TWN	F	0:05:27.180-0:05:27.446	ITI2	0.0714005	8	0.267483
Trial 1	1.1	S_TWN	F	0:05:27.446-0:05:27.712	ITI2	0.097564	8	0.365502
Trial 1	1.1	S_TWN	F	0:05:27.712-0:05:27.978	ITI2	0.0893921	8	0.334883
Trial 1	1.1	S_TWN	F	0:05:27.978-0:05:28.244	ITI2	0.128706	8	0.482164
Trial 1	1.1	S_TWN	F	0:05:28.244-0:05:28.510	ITI2	0.0389919	8	0.146073
Trial 1	1.1	S_TWN	F	0:05:28.510-0:05:28.776	ITI2	0.089859	8	0.336633
Trial 1	1.1	S_TWN	F	0:05:28.776-0:05:29.042	ITI2	0.0240437	8	0.090074
Trial 1	1.1	S_TWN	F	0:05:29.042-0:05:29.308	ITI2	0.12538	8	0.469707
Trial 1	1.1	S_TWN	F	0:05:29.308-0:05:29.574	ITI2	0.0607069	8	0.227423
Trial 1	1.1	S_TWN	F	0:05:29.574-0:05:29.840	ITI2	0.0546426	8	0.204704
Trial 1	1.1	S_TWN	F	0:05:29.840-0:05:30.106	ITI2	0.042052	8	0.157537
Trial 1	1.1	S_TWN	F	0:05:30.106-0:05:30.372	ITI2	0.0575952	8	0.215766
Trial 1	1.1	S_TWN	F	0:05:30.372-0:05:30.638	ITI2	0.0493083	8	0.18472
Trial 1	1.1	S_TWN	F	0:05:30.638-0:05:30.904	ITI2	0.0277115	8	0.103815
Trial 1	1.1	S_TWN	F	0:05:30.904-0:05:31.170	ITI2	0.10002	8	0.374697
Trial 1	1.1	S_TWN	F	0:05:31.170-0:05:31.436	ITI2	0.029971	8	0.112279
Trial 1	1.1	S_TWN	F	0:05:31.436-0:05:31.702	ITI2	0.0618438	8	0.231682
Trial 1	1.1	S_TWN	F	0:05:31.702-0:05:31.968	ITI2	0.0459275	8	0.172056
Trial 1	1.1	S_TWN	F	0:05:31.968-0:05:32.234	ITI2	0.0963266	8	0.360866
Trial 1	1.1	S_TWN	F	0:05:32.234-0:05:32.500	ITI2	0.0429354	8	0.160846
Trial 1	1.1	S_TWN	F	0:05:32.500-0:05:32.766	ITI2	0.031704	7	0.135738
Trial 1	1.1	S_TWN	F	0:05:32.766-0:05:33.032	ITI2	0.0371242	8	0.139077
Trial 1	1.1	S_TWN	F	0:05:33.032-0:05:33.298	ITI2	0.0492271	8	0.184417
Trial 1	1.1	S_TWN	F	0:05:33.298-0:05:33.564	ITI2	0.0719125	8	0.269401
Trial 1	1.1	S_TWN	F	0:05:33.564-0:05:33.830	ITI2	0.0371749	8	0.139267
Trial 1	1.1	S_TWN	F	0:05:33.830-0:05:34.096	ITI2	0.0660557	8	0.247461
Trial 1	1.1	S_TWN	F	0:05:34.096-0:05:34.362	ITI2	0.0342947	8	0.128476
Trial 1	1.1	S_TWN	F	0:05:34.362-0:05:34.628	ITI2	0.0560915	8	0.210132
Trial 1	1.1	S_TWN	F	0:05:34.628-0:05:34.894	ITI2	0.0386575	8	0.144821
Trial 1	1.1	S_TWN	F	0:05:34.894-0:05:35.160	ITI2	0.0387915	8	0.145324
Trial 1	1.1	S_TWN	F	0:05:35.160-0:05:35.426	ITI2	0.0393801	8	0.147527
Trial 1	1.1	S_TWN	F	0:05:35.426-0:05:35.692	ITI2	0.0177587	8	0.0665283
Trial 1	1.1	S_TWN	F	0:05:35.692-0:05:35.958	ITI2	0.0572318	8	0.214405
Trial 1	1.1	S_TWN	F	0:05:35.958-0:05:36.224	ITI2	0.105213	8	0.394154
Trial 1	1.1	S_TWN	F	0:05:36.224-0:05:36.490	ITI2	0.139394	8	0.522203
Trial 1	1.1	S_TWN	F	0:05:36.490-0:05:36.756	ITI2	0.162042	8	0.607053
Trial 1	1.1	S_TWN	F	0:05:36.756-0:05:37.022	ITI2	0.0929974	8	0.34839
Trial 1	1.1	S_TWN	F	0:05:37.022-0:05:37.288	ITI2	0.0473015	8	0.177204
Trial 1	1.1	S_TWN	F	0:05:37.288-0:05:37.554	ITI2	0.0589676	8	0.220907
Trial 1	1.1	S_TWN	F	0:05:37.554-0:05:37.820	ITI2	0.0891201	8	0.333865
Trial 1	1.1	S_TWN	F	0:05:37.820-0:05:38.086	ITI2	0.0192208	8	0.0720058
Trial 1	1.1	S_TWN	F	0:05:38.086-0:05:38.352	ITI2	0.0679653	8	0.254616
Trial 1	1.1	S_TWN	F	0:05:38.352-0:05:38.618	ITI2	0.105852	8	0.396549
Trial 1	1.1	S_TWN	F	0:05:38.618-0:05:38.884	ITI2	0.0913795	8	0.34233
Trial 1	1.1	S_TWN	F	0:05:38.884-0:05:39.150	ITI2	0.0819758	8	0.3071
Trial 1	1.1	S_TWN	F	0:05:39.150-0:05:39.416	ITI2	0.0865777	8	0.32434
Trial 1	1.1	S_TWN	F	0:05:39.416-0:05:39.682	ITI2	0.0470227	8	0.176159
Trial 1	1.1	S_TWN	F	0:05:39.682-0:05:39.948	ITI2	0.0464807	8	0.174129
Trial 1	1.1	S_TWN	F	0:05:39.948-0:05:40.214	ITI2	0.0831788	8	0.311607
Trial 1	1.1	S_TWN	F	0:05:40.214-0:05:40.480	ITI2	0.483241	8	1.81035
Trial 1	1.1	S_TWN	F	0:05:40.480-0:05:40.746	ITI2	0.537234	8	2.0126
Trial 1	1.1	S_TWN	F	0:05:40.746-0:05:41.012	ITI2	0.284619	8	1.06626
Trial 1	1.1	S_TWN	F	0:05:41.012-0:05:41.278	ITI2	0.23467	8	0.879135
Trial 1	1.1	S_TWN	F	0:05:41.278-0:05:41.544	ITI2	0.357147	8	1.33796
Trial 1	1.1	S_TWN	F	0:05:41.544-0:05:41.810	ITI2	0.475978	8	1.78315
Trial 1	1.1	S_TWN	F	0:05:41.810-0:05:42.076	ITI2	0.736053	8	2.75742
Trial 1	1.1	S_TWN	F	0:05:42.076-0:05:42.342	ITI2	0.429544	7	1.83906
Trial 1	1.1	S_TWN	F	0:05:42.342-0:05:42.608	ITI2	0.340427	8	1.27534
Trial 1	1.1	S_TWN	F	0:05:42.608-0:05:42.874	ITI2	0.00638003	8	0.0239011
Trial 1	1.1	S_TWN	F	0:05:42.874-0:05:43.140	ITI2	0.00638003	8	0.0239011
Trial 1	1.1	S_TWN	F	0:05:43.140-0:05:43.406	ITI2	0.00638003	8	0.0239012
Trial 1	1.1	S_TWN	F	0:05:43.406-0:05:43.672	ITI2	0.00638003	8	0.0239011
Trial 1	1.1	S_TWN	F	0:05:43.672-0:05:43.938	ITI2	0.00638003	8	0.0239012
Trial 1	1.1	S_TWN	F	0:05:43.938-0:05:44.204	ITI2	0.00638003	8	0.0239011
Trial 1	1.1	S_TWN	F	0:05:44.204-0:05:44.470	ITI2	0.00638003	8	0.0239011
Trial 1	1.1	S_TWN	F	0:05:44.470-0:05:44.736	ITI2	0.00638003	8	0.0239012
Trial 1	1.1	S_TWN	F	0:05:44.736-0:05:45.002	ITI2	0.00638003	8	0.0239011
Trial 1	1.1	S_TWN	F	0:05:45.002-0:05:45.268	ITI2	0.00638003	8	0.0239012
Trial 1	1.1	S_TWN	F	0:05:45.268-0:05:45.534	ITI2	0.00638003	8	0.0239011
Trial 1	1.1	S_TWN	F	0:05:45.534-0:05:45.800	ITI2	0.00638003	8	0.0239011
Trial 1	1.1	S_TWN	F	0:05:45.800-0:05:46.066	ITI2	0.00638003	8	0.0239012
Trial 1	1.1	S_TWN	F	0:05:46.066-0:05:46.332	ITI2	0.00638003	8	0.0239011
Trial 1	1.1	S_TWN	F	0:05:46.332-0:05:46.598	ITI2	0.00638003	8	0.0239012
Trial 1	1.1	S_TWN	F	0:05:46.598-0:05:46.864	ITI2	0.00638003	8	0.0239011
Trial 1	1.1	S_TWN	F	0:05:46.864-0:05:47.130	ITI2	0.00638003	8	0.0239011
Trial 1	1.1	S_TWN	F	0:05:47.130-0:05:47.396	ITI2	0.00638003	8	0.0239012
Trial 1	1.1	S_TWN	F	0:05:47.396-0:05:47.662	ITI2	0.00638003	8	0.0239011
Trial 1	1.1	S_TWN	F	0:05:47.662-0:05:47.928	ITI2	0.00638003	8	0.0239012
Trial 1	1.1	S_TWN	F	0:05:47.928-0:05:48.194	ITI2	0.00638003	8	0.0239011
Trial 1	1.1	S_TWN	F	0:05:48.194-0:05:48.460	ITI2	0.00638003	8	0.0239011
Trial 1	1.1	S_TWN	F	0:05:48.460-0:05:48.726	ITI2	0.00638003	8	0.0239012
Trial 1	1.1	S_TWN	F	0:05:48.726-0:05:48.992	ITI2	0.00638003	8	0.0239011
Trial 1	1.1	S_TWN	F	0:05:48.992-0:05:49.258	ITI2	0.00638003	8	0.0239012
Trial 1	1.1	S_TWN	F	0:05:49.258-0:05:49.524	ITI2	0.00638003	8	0.0239011
Trial 1	1.1	S_TWN	F	0:05:49.524-0:05:49.790	ITI2	0.00638003	8	0.0239011
Trial 1	1.1	S_TWN	F	0:05:49.790-0:05:50.056	ITI2	0.00638003	8	0.0239012
Trial 1	1.1	S_TWN	F	0:05:50.056-0:05:50.322	ITI2	0.00638003	8	0.0239011
Trial 1	1.1	S_TWN	F	0:05:50.322-0:05:50.588	ITI2	0.00638003	8	0.0239012
Trial 1	1.1	S_TWN	F	0:05:50.588-0:05:50.854	ITI2	0.00638003	8	0.0239011
Trial 1	1.1	S_TWN	F	0:05:50.854-0:05:51.120	ITI2	0.00638003	8	0.0239011
Trial 1	1.1	S_TWN	F	0:05:51.120-0:05:51.386	ITI2	0.00638003	8	0.0239012
Trial 1	1.1	S_TWN	F	0:05:51.386-0:05:51.652	ITI2	0.00638003	8	0.0239011
Trial 1	1.1	S_TWN	F	0:05:51.652-0:05:51.918	ITI2	0.00558253	7	0.0239012
Trial 1	1.1	S_TWN	F	0:05:51.918-0:05:52.184	ITI2	0.00638003	8	0.0239012
Trial 1	1.1	S_TWN	F	0:05:52.184-0:05:52.450	ITI2	0.00638003	8	0.0239011
Trial 1	1.1	S_TWN	F	0:05:52.450-0:05:52.716	ITI2	0.00638003	8	0.0239011
Trial 1	1.1	S_TWN	F	0:05:52.716-0:05:52.982	ITI2	0.00638003	8	0.0239012
Trial 1	1.1	S_TWN	F	0:05:52.982-0:05:53.248	ITI2	0.00638003	8	0.0239011
Trial 1	1.1	S_TWN	F	0:05:53.248-0:05:53.514	ITI2	0.00638003	8	0.0239012
Trial 1	1.1	S_TWN	F	0:05:53.514-0:05:53.780	ITI2	0.00638003	8	0.0239011
Trial 1	1.1	S_TWN	F	0:05:53.780-0:05:54.046	ITI2	0.00638003	8	0.0239011
Trial 1	1.1	S_TWN	F	0:05:54.046-0:05:54.312	ITI2	0.00638003	8	0.0239012
Trial 1	1.1	S_TWN	F	0:05:54.312-0:05:54.578	ITI2	0.00638003	8	0.0239011
Trial 1	1.1	S_TWN	F	0:05:54.578-0:05:54.844	ITI2	0.00638003	8	0.0239012
Trial 1	1.1	S_TWN	F	0:05:54.844-0:05:55.110	ITI2	0.00638003	8	0.0239011
Trial 1	1.1	S_TWN	F	0:05:55.110-0:05:55.376	ITI2	0.00638003	8	0.0239011
Trial 1	1.1	S_TWN	F	0:05:55.376-0:05:55.642	ITI2	0.00638003	8	0.0239012
Trial 1	1.1	S_TWN	F	0:05:55.642-0:05:55.908	ITI2	0.00638003	8	0.0239011
Trial 1	1.1	S_TWN	F	0:05:55.908-0:05:56.174	ITI2	0.00638003	8	0.0239012
Trial 1	1.1	S_TWN	F	0:05:56.174-0:05:56.440	ITI2	0.00638003	8	0.0239011
Trial 1	1.1	S_TWN	F	0:05:56.440-0:05:56.706	ITI2	0.00638003	8	0.0239011
Trial 1	1.1	S_TWN	F	0:05:56.706-0:05:56.972	ITI2	0.00638003	8	0.0239012
Trial 1	1.1	S_TWN	F	0:05:56.972-0:05:57.238	ITI2	0.00638003	8	0.0239011
Trial 1	1.1	S_TWN	F	0:05:57.238-0:05:57.504	ITI2	0.00638003	8	0.0239012
Trial 1	1.1	S_TWN	F	0:05:57.504-0:05:57.770	ITI2	0.00638003	8	0.0239011
Trial 1	1.1	S_TWN	F	0:05:57.770-0:05:58.036	ITI2	0.00638003	8	0.0239011
Trial 1	1.1	S_TWN	F	0:05:58.036-0:05:58.302	ITI2	0.00638003	8	0.0239012
Trial 1	1.1	S_TWN	F	0:05:58.302-0:05:58.568	ITI2	0.00638003	8	0.0239011
Trial 1	1.1	S_TWN	F	0:05:58.568-0:05:58.834	ITI2	0.00638003	8	0.0239012
Trial 1	1.1	S_TWN	F	0:05:58.834-0:05:59.100	ITI2	0.00638003	8	0.0239011
Trial 1	1.1	S_TWN	F	0:05:59.100-0:05:59.366	ITI2	0.00638003	8	0.0239011
Trial 1	1.1	S_TWN	F	0:05:59.366-0:05:59.632	ITI2	0.00638003	8	0.0239012
Trial 1	1.1	S_TWN	F	0:05:59.632-0:05:59.898	ITI2	0.00638003	8	0.0239011
Trial 1	1.1	S_TWN	F	0:05:59.898-0:06:00.164	ITI2	0.00638003	8	0.0239012
Trial 1	1.1	S_TWN	F	0:06:00.164-0:06:00.430	ITI2	0.00638003	8	0.0239011
Trial 1	1.1	S_TWN	F	0:06:00.430-0:06:00.696	ITI2	0.00638003	8	0.0239011
Trial 1	1.1	S_TWN	F	0:06:00.696-0:06:00.962	ITI2	0.00638003	8	0.0239012
Trial 1	1.1	S_TWN	F	0:06:00.962-0:06:01.228	ITI2	0.00638003	8	0.0239011
Trial 1	1.1	S_TWN	F	0:06:01.228-0:06:01.494	ITI2	0.00558253	7	0.0239012
Trial 1	1.1	S_TWN	F	0:06:01.494-0:06:01.760	ITI2	0.00638003	8	0.0239012
Trial 1	1.1	S_TWN	F	0:06:01.760-0:06:02.026	ITI2	0.00638003	8	0.0239011
Trial 1	1.1	S_TWN	F	0:06:02.026-0:06:02.292	ITI2	0.00638003	8	0.0239012
Trial 1	1.1	S_TWN	F	0:06:02.292-0:06:02.558	ITI2	0.00638003	8	0.0239011
Trial 1	1.1	S_TWN	F	0:06:02.558-0:06:02.824	ITI2	0.00638003	8	0.0239011
Trial 1	1.1	S_TWN	F	0:06:02.824-0:06:03.090	ITI2	0.00638003	8	0.0239012
Trial 1	1.1	S_TWN	F	0:06:03.090-0:06:03.356	ITI2	0.00638003	8	0.0239011
Trial 1	1.1	S_TWN	F	0:06:03.356-0:06:03.622	ITI2	0.00638003	8	0.0239012
Trial 1	1.1	S_TWN	F	0:06:03.622-0:06:03.888	ITI2	0.00638003	8	0.0239011
Trial 1	1.1	S_TWN	F	0:06:03.888-0:06:04.154	ITI2	0.00638003	8	0.0239011
Trial 1	1.1	S_TWN	F	0:06:04.154-0:06:04.420	ITI2	0.00638003	8	0.0239012
Trial 1	1.1	S_TWN	F	0:06:04.420-0:06:04.686	ITI2	0.00638003	8	0.0239011
Trial 1	1.1	S_TWN	F	0:06:04.686-0:06:04.952	ITI2	0.00638003	8	0.0239012
Trial 1	1.1	S_TWN	F	0:06:04.952-0:06:05.218	ITI2	0.00638003	8	0.0239011
Trial 1	1.1	S_TWN	F	0:06:05.218-0:06:05.484	ITI2	0.00638003	8	0.0239011
Trial 1	1.1	S_TWN	F	0:06:05.484-0:06:05.750	ITI2	0.00638003	8	0.0239012
Trial 1	1.1	S_TWN	F	0:06:05.750-0:06:06.016	ITI2	0.00638003	8	0.0239011
Trial 1	1.1	S_TWN	F	0:06:06.016-0:06:06.282	ITI2	0.00638003	8	0.0239012
Trial 1	1.1	S_TWN	F	0:06:06.282-0:06:06.548	ITI2	0.00638003	8	0.0239011
Trial 1	1.1	S_TWN	F	0:06:06.548-0:06:06.814	ITI2	0.00638003	8	0.0239011
Trial 1	1.1	S_TWN	F	0:06:06.814-0:06:07.080	ITI2	0.00638003	8	0.0239012
Trial 1	1.1	S_TWN	F	0:06:07.080-0:06:07.346	ITI2	0.00638003	8	0.0239011
Trial 1	1.1	S_TWN	F	0:06:07.346-0:06:07.612	ITI2	0.00638003	8	0.0239012
Trial 1	1.1	S_TWN	F	0:06:07.612-0:06:07.878	ITI2	0.00638003	8	0.0239011
Trial 1	1.1	S_TWN	F	0:06:07.878-0:06:08.144	ITI2	0.00638003	8	0.0239011
Trial 1	1.1	S_TWN	F	0:06:08.144-0:06:08.410	ITI2	0.00638003	8	0.0239012
Trial 1	1.1	S_TWN	F	0:06:08.410-0:06:08.676	ITI2	0.00638003	8	0.0239011
Trial 1	1.1	S_TWN	F	0:06:08.676-0:06:08.942	ITI2	0.00638003	8	0.0239012
Trial 1	1.1	S_TWN	F	0:06:08.942-0:06:09.208	ITI2	0.00638003	8	0.0239011
Trial 1	1.1	S_TWN	F	0:06:09.208-0:06:09.474	ITI2	0.00638003	8	0.0239011
Trial 1	1.1	S_TWN	F	0:06:09.474-0:06:09.740	ITI2	0.00638003	8	0.0239012
Trial 1	1.1	S_TWN	F	0:06:09.740-0:06:10.006	ITI2	0.00638003	8	0.0239011
Trial 1	1.1	S_TWN	F	0:06:10.006-0:06:10.272	ITI2	0.00638003	8	0.0239012
Trial 1	1.1	S_TWN	F	0:06:10.272-0:06:10.538	ITI2	0.00638003	8	0.0239011
Trial 1	1.1	S_TWN	F	0:06:10.538-0:06:10.804	ITI2	0.00558253	7	0.0239012
Trial 1	1.1	S_TWN	F	0:06:10.804-0:06:11.070	ITI2	0.00638003	8	0.0239011
Trial 1	1.1	S_TWN	F	0:06:11.070-0:06:11.336	ITI2	0.00638003	8	0.0239012
Trial 1	1.1	S_TWN	F	0:06:11.336-0:06:11.602	ITI2	0.00638003	8	0.0239011
Trial 1	1.1	S_TWN	F	0:06:11.602-0:06:11.868	ITI2	0.00638003	8	0.0239012
Trial 1	1.1	S_TWN	F	0:06:11.868-0:06:12.134	ITI2	0.00638003	8	0.0239011
Trial 1	1.1	S_TWN	F	0:06:12.134-0:06:12.400	ITI2	0.00638003	8	0.0239011
Trial 1	1.1	S_TWN	F	0:06:12.400-0:06:12.666	ITI2	0.00638003	8	0.0239012
Trial 1	1.1	S_TWN	F	0:06:12.666-0:06:12.932	ITI2	0.00638003	8	0.0239011
Trial 1	1.1	S_TWN	F	0:06:12.932-0:06:13.198	ITI2	0.00638003	8	0.0239012
Trial 1	1.1	S_TWN	F	0:06:13.198-0:06:13.464	ITI2	0.00638003	8	0.0239011
Trial 1	1.1	S_TWN	F	0:06:13.464-0:06:13.730	ITI2	0.00638003	8	0.0239011
Trial 1	1.1	S_TWN	F	0:06:13.730-0:06:13.996	ITI2	0.00638003	8	0.0239012
Trial 1	1.1	S_TWN	F	0:06:13.996-0:06:14.262	ITI2	0.00638003	8	0.0239011
Trial 1	1.1	S_TWN	F	0:06:14.262-0:06:14.528	ITI2	0.00638003	8	0.0239012
Trial 1	1.1	S_TWN	F	0:06:14.528-0:06:14.794	ITI2	0.00638003	8	0.0239011
Trial 1	1.1	S_TWN	F	0:06:14.794-0:06:15.060	ITI2	0.00638003	8	0.0239011
Trial 1	1.1	S_TWN	F	0:06:15.060-0:06:15.326	ITI2	0.00638003	8	0.0239012
Trial 1	1.1	S_TWN	F	0:06:15.326-0:06:15.592	ITI2	0.00638003	8	0.0239011
Trial 1	1.1	S_TWN	F	0:06:15.592-0:06:15.858	ITI2	0.00638003	8	0.0239012
Trial 1	1.1	S_TWN	F	0:06:15.858-0:06:16.124	ITI2	0.00638003	8	0.0239011
Trial 1	1.1	S_TWN	F	0:06:16.124-0:06:16.390	ITI2	0.00638003	8	0.0239011
Trial 1	1.1	S_TWN	F	0:06:16.390-0:06:16.656	ITI2	0.00638003	8	0.0239012
Trial 1	1.1	S_TWN	F	0:06:16.656-0:06:16.922	ITI2	0.00638003	8	0.0239011
Trial 1	1.1	S_TWN	F	0:06:16.922-0:06:17.188	ITI2	0.00638003	8	0.0239012
Trial 1	1.1	S_TWN	F	0:06:17.188-0:06:17.454	ITI2	0.00638003	8	0.0239011
Trial 1	1.1	S_TWN	F	0:06:17.454-0:06:17.720	ITI2	0.00638003	8	0.0239011
Trial 1	1.1	S_TWN	F	0:06:17.720-0:06:17.986	ITI2	0.00638003	8	0.0239012
Trial 1	1.1	S_TWN	F	0:06:17.986-0:06:18.252	ITI2	0.00638003	8	0.0239011
Trial 1	1.1	S_TWN	F	0:06:18.252-0:06:18.518	ITI2	0.00638003	8	0.0239012
Trial 1	1.1	S_TWN	F	0:06:18.518-0:06:18.784	ITI2	0.00638003	8	0.0239011
Trial 1	1.1	S_TWN	F	0:06:18.784-0:06:19.050	ITI2	0.00638003	8	0.0239011
Trial 1	1.1	S_TWN	F	0:06:19.050-0:06:19.316	ITI2	0.00638003	8	0.0239012
Trial 1	1.1	S_TWN	F	0:06:19.316-0:06:19.582	ITI2	0.00638003	8	0.0239011
Trial 1	1.1	S_TWN	F	0:06:19.582-0:06:19.848	ITI2	0.00638003	8	0.0239012
Trial 1	1.1	S_TWN	F	0:06:19.848-0:06:20.114	ITI2	0.00638003	8	0.0239011
Trial 1	1.1	S_TWN	F	0:06:20.114-0:06:20.380	ITI2	0.00558253	7	0.0239012
Trial 1	1.1	S_TWN	F	0:06:20.380-0:06:20.646	ITI2	0.00638003	8	0.0239012
Trial 1	1.1	S_TWN	F	0:06:20.646-0:06:20.912	ITI2	0.00638003	8	0.0239011
Trial 1	1.1	S_TWN	F	0:06:20.912-0:06:21.178	ITI2	0.00638003	8	0.0239011
Trial 1	1.1	S_TWN	F	0:06:21.178-0:06:21.444	ITI2	0.00638003	8	0.0239012
Trial 1	1.1	S_TWN	F	0:06:21.444-0:06:21.710	ITI2	0.00638003	8	0.0239011
Trial 1	1.1	S_TWN	F	0:06:21.710-0:06:21.976	ITI2	0.00638003	8	0.0239012
Trial 1	1.1	S_TWN	F	0:06:21.976-0:06:22.242	ITI2	0.00638003	8	0.0239011
Trial 1	1.1	S_TWN	F	0:06:22.242-0:06:22.508	ITI2	0.00638003	8	0.0239011
Trial 1	1.1	S_TWN	F	0:06:22.508-0:06:22.774	ITI2	0.00638003	8	0.0239012
Trial 1	1.1	S_TWN	F	0:06:22.774-0:06:23.040	ITI2	0.00638003	8	0.0239011
Trial 1	1.1	S_TWN	F	0:06:23.040-0:06:23.306	ITI2	0.00638003	8	0.0239012
Trial 1	1.1	S_TWN	F	0:06:23.306-0:06:23.572	ITI2	0.00638003	8	0.0239011
Trial 1	1.1	S_TWN	F	0:06:23.572-0:06:23.838	ITI2	0.00638003	8	0.0239011
Trial 1	1.1	S_TWN	F	0:06:23.838-0:06:24.104	ITI2	0.00638003	8	0.0239012
Trial 1	1.1	S_TWN	F	0:06:24.104-0:06:24.370	ITI2	0.00638003	8	0.0239011
Trial 1	1.1	S_TWN	F	0:06:24.370-0:06:24.636	ITI2	0.00638003	8	0.0239012
Trial 1	1.1	S_TWN	F	0:06:24.636-0:06:24.902	ITI2	0.00638003	8	0.0239011
Trial 1	1.1	S_TWN	F	0:06:24.902-0:06:25.168	ITI2	0.00638003	8	0.0239011
Trial 1	1.1	S_TWN	F	0:06:25.168-0:06:25.434	ITI2	0.00638003	8	0.0239012
Trial 1	1.1	S_TWN	F	0:06:25.434-0:06:25.700	ITI2	0.00638003	8	0.0239011
Trial 1	1.1	S_TWN	F	0:06:25.700-0:06:25.966	ITI2	0.00638003	8	0.0239012
Trial 1	1.1	S_TWN	F	0:06:25.966-0:06:26.232	ITI2	0.00638003	8	0.0239011
Trial 1	1.1	S_TWN	F	0:06:26.232-0:06:26.498	ITI2	0.00638003	8	0.0239011
Trial 1	1.1	S_TWN	F	0:06:26.498-0:06:26.764	ITI2	0.00638003	8	0.0239012
Trial 1	1.1	S_TWN	F	0:06:26.764-0:06:27.030	ITI2	0.00638003	8	0.0239011
Trial 1	1.1	S_TWN	F	0:06:27.030-0:06:27.296	ITI2	0.00638003	8	0.0239012
Trial 1	1.1	S_TWN	F	0:06:27.296-0:06:27.562	ITI2	0.00638003	8	0.0239011
Trial 1	1.1	S_TWN	F	0:06:27.562-0:06:27.828	ITI2	0.00638003	8	0.0239011
Trial 1	1.1	S_TWN	F	0:06:27.828-0:06:28.094	ITI2	0.00638003	8	0.0239012
Trial 1	1.1	S_TWN	F	0:06:28.094-0:06:28.360	ITI2	0.00638003	8	0.0239011
Trial 1	1.1	S_TWN	F	0:06:28.360-0:06:28.626	ITI2	0.00638003	8	0.0239012
Trial 1	1.1	S_TWN	F	0:06:28.626-0:06:28.892	ITI2	0.00638003	8	0.0239011
Trial 1	1.1	S_TWN	F	0:06:28.892-0:06:29.158	ITI2	0.00638003	8	0.0239011
Trial 1	1.1	S_TWN	F	0:06:29.158-0:06:29.424	ITI2	0.00638003	8	0.0239012
Trial 1	1.1	S_TWN	F	0:06:29.424-0:06:29.690	ITI2	0.00638003	8	0.0239011
Trial 1	1.1	S_TWN	F	0:06:29.690-0:06:29.956	ITI2	0.00558253	7	0.0239012
Trial 1	1.1	S_TWN	F	0:06:29.956-0:06:30.222	ITI2	0.00638003	8	0.0239012
Trial 1	1.1	S_TWN	F	0:06:30.222-0:06:30.488	CS3a	0.00638003	8	0.0239011
Trial 1	1.1	S_TWN	F	0:06:30.488-0:06:30.754	CS3a	0.00638003	8	0.0239011
Trial 1	1.1	S_TWN	F	0:06:30.754-0:06:31.020	CS3a	0.00638003	8	0.0239012
Trial 1	1.1	S_TWN	F	0:06:31.020-0:06:31.286	CS3a	0.00638003	8	0.0239011
Trial 1	1.1	S_TWN	F	0:06:31.286-0:06:31.552	CS3a	0.00638003	8	0.0239012
Trial 1	1.1	S_TWN	F	0:06:31.552-0:06:31.818	CS3a	0.00638003	8	0.0239011
Trial 1	1.1	S_TWN	F	0:06:31.818-0:06:32.084	CS3a	0.00638003	8	0.0239011
Trial 1	1.1	S_TWN	F	0:06:32.084-0:06:32.350	CS3a	0.00638003	8	0.0239012
Trial 1	1.1	S_TWN	F	0:06:32.350-0:06:32.616	CS3a	0.00638003	8	0.0239011
Trial 1	1.1	S_TWN	F	0:06:32.616-0:06:32.882	CS3a	0.00638003	8	0.0239012
Trial 1	1.1	S_TWN	F	0:06:32.882-0:06:33.148	CS3a	0.00638003	8	0.0239011
Trial 1	1.1	S_TWN	F	0:06:33.148-0:06:33.414	CS3a	0.00638003	8	0.0239011
Trial 1	1.1	S_TWN	F	0:06:33.414-0:06:33.680	CS3a	0.00638003	8	0.0239012
Trial 1	1.1	S_TWN	F	0:06:33.680-0:06:33.946	CS3a	0.00638003	8	0.0239011
Trial 1	1.1	S_TWN	F	0:06:33.946-0:06:34.212	CS3a	0.00638003	8	0.0239012
Trial 1	1.1	S_TWN	F	0:06:34.212-0:06:34.478	CS3a	0.00638003	8	0.0239011
Trial 1	1.1	S_TWN	F	0:06:34.478-0:06:34.744	CS3a	0.00638003	8	0.0239011
Trial 1	1.1	S_TWN	F	0:06:34.744-0:06:35.010	CS3a	0.00638003	8	0.0239012
Trial 1	1.1	S_TWN	F	0:06:35.010-0:06:35.276	CS3a	0.00638003	8	0.0239011
Trial 1	1.1	S_TWN	F	0:06:35.276-0:06:35.542	CS3a	0.00638003	8	0.0239012
Trial 1	1.1	S_TWN	F	0:06:35.542-0:06:35.808	CS3a	0.00638003	8	0.0239011
Trial 1	1.1	S_TWN	F	0:06:35.808-0:06:36.074	CS3a	0.00638003	8	0.0239011
Trial 1	1.1	S_TWN	F	0:06:36.074-0:06:36.340	CS3a	0.00638003	8	0.0239012
Trial 1	1.1	S_TWN	F	0:06:36.340-0:06:36.606	CS3a	0.00638003	8	0.0239011
Trial 1	1.1	S_TWN	F	0:06:36.606-0:06:36.872	CS3a	0.00638003	8	0.0239012
Trial 1	1.1	S_TWN	F	0:06:36.872-0:06:37.138	CS3a	0.00638003	8	0.0239011
Trial 1	1.1	S_TWN	F	0:06:37.138-0:06:37.404	CS3a	0.00638003	8	0.0239011
Trial 1	1.1	S_TWN	F	0:06:37.404-0:06:37.670	CS3a	0.00638003	8	0.0239012
Trial 1	1.1	S_TWN	F	0:06:37.670-0:06:37.936	CS3a	0.00638003	8	0.0239011
Trial 1	1.1	S_TWN	F	0:06:37.936-0:06:38.202	CS3a	0.00638003	8	0.0239012
Trial 1	1.1	S_TWN	F	0:06:38.202-0:06:38.468	CS3a	0.00638003	8	0.0239011
Trial 1	1.1	S_TWN	F	0:06:38.468-0:06:38.734	CS3a	0.00638003	8	0.0239011
Trial 1	1.1	S_TWN	F	0:06:38.734-0:06:39.000	CS3a	0.00638003	8	0.0239012
Trial 1	1.1	S_TWN	F	0:06:39.000-0:06:39.266	CS3a	0.00638003	8	0.0239011
Trial 1	1.1	S_TWN	F	0:06:39.266-0:06:39.532	CS3a	0.00558253	7	0.0239012
Trial 1	1.1	S_TWN	F	0:06:39.532-0:06:39.798	CS3a	0.00638003	8	0.0239012
Trial 1	1.1	S_TWN	F	0:06:39.798-0:06:40.064	CS3a	0.00638003	8	0.0239011
Trial 1	1.1	S_TWN	F	0:06:40.064-0:06:40.330	CS3b	0.00638003	8	0.0239012
Trial 1	1.1	S_TWN	F	0:06:40.330-0:06:40.596	CS3b	0.00638003	8	0.0239011
Trial 1	1.1	S_TWN	F	0:06:40.596-0:06:40.862	CS3b	0.00638003	8	0.0239011
Trial 1	1.1	S_TWN	F	0:06:40.862-0:06:41.128	CS3b	0.00638003	8	0.0239012
Trial 1	1.1	S_TWN	F	0:06:41.128-0:06:41.394	CS3b	0.00638003	8	0.0239011
Trial 1	1.1	S_TWN	F	0:06:41.394-0:06:41.660	CS3b	0.00638003	8	0.0239012
Trial 1	1.1	S_TWN	F	0:06:41.660-0:06:41.926	CS3b	0.00638003	8	0.0239011
Trial 1	1.1	S_TWN	F	0:06:41.926-0:06:42.192	CS3b	0.00638003	8	0.0239011
Trial 1	1.1	S_TWN	F	0:06:42.192-0:06:42.458	CS3b	0.00638003	8	0.0239012
Trial 1	1.1	S_TWN	F	0:06:42.458-0:06:42.724	CS3b	0.00638003	8	0.0239011
Trial 1	1.1	S_TWN	F	0:06:42.724-0:06:42.990	CS3b	0.00638003	8	0.0239012
Trial 1	1.1	S_TWN	F	0:06:42.990-0:06:43.256	CS3b	0.00638003	8	0.0239011
Trial 1	1.1	S_TWN	F	0:06:43.256-0:06:43.522	CS3b	0.00638003	8	0.0239011
Trial 1	1.1	S_TWN	F	0:06:43.522-0:06:43.788	CS3b	0.00638003	8	0.0239012
Trial 1	1.1	S_TWN	F	0:06:43.788-0:06:44.054	CS3b	0.00638003	8	0.0239011
Trial 1	1.1	S_TWN	F	0:06:44.054-0:06:44.320	CS3b	0.00638003	8	0.0239012
Trial 1	1.1	S_TWN	F	0:06:44.320-0:06:44.586	CS3b	0.00638003	8	0.0239011
Trial 1	1.1	S_TWN	F	0:06:44.586-0:06:44.852	CS3b	0.00638003	8	0.0239011
Trial 1	1.1	S_TWN	F	0:06:44.852-0:06:45.118	CS3b	0.00638003	8	0.0239012
Trial 1	1.1	S_TWN	F	0:06:45.118-0:06:45.384	CS3b	0.00638003	8	0.0239011
Trial 1	1.1	S_TWN	F	0:06:45.384-0:06:45.650	CS3b	0.849642	8	3.18298
Trial 1	1.1	S_TWN	F	0:06:45.650-0:06:45.916	CS3b	0.423987	8	1.58835
Trial 1	1.1	S_TWN	F	0:06:45.916-0:06:46.182	CS3b	0.485887	8	1.82025
Trial 1	1.1	S_TWN	F	0:06:46.182-0:06:46.448	CS3b	0.155048	8	0.580848
Trial 1	1.1	S_TWN	F	0:06:46.448-0:06:46.714	CS3b	0.00332279	8	0.012448
Trial 1	1.1	S_TWN	F	0:06:46.714-0:06:46.980	CS3b	0.00332279	8	0.012448
Trial 1	1.1	S_TWN	F	0:06:46.980-0:06:47.246	CS3b	0.00332279	8	0.012448
Trial 1	1.1	S_TWN	F	0:06:47.246-0:06:47.512	CS3b	0.00332279	8	0.012448
Trial 1	1.1	S_TWN	F	0:06:47.512-0:06:47.778	CS3b	0.00332279	8	0.012448
Trial 1	1.1	S_TWN	F	0:06:47.778-0:06:48.044	CS3b	0.00332279	8	0.012448
Trial 1	1.1	S_TWN	F	0:06:48.044-0:06:48.310	CS3b	0.00332279	8	0.012448
Trial 1	1.1	S_TWN	F	0:06:48.310-0:06:48.576	CS3b	0.00332279	8	0.012448
Trial 1	1.1	S_TWN	F	0:06:48.576-0:06:48.842	CS3b	0.00290744	7	0.012448
Trial 1	1.1	S_TWN	F	0:06:48.842-0:06:49.108	CS3b	0.00332279	8	0.012448
Trial 1	1.1	S_TWN	F	0:06:49.108-0:06:49.374	CS3b	0.00332279	8	0.012448
Trial 1	1.1	S_TWN	F	0:06:49.374-0:06:49.640	CS3b	0.00332279	8	0.012448
Trial 1	1.1	S_TWN	F	0:06:49.640-0:06:49.906	CS3b	0.00332279	8	0.012448
Trial 1	1.1	S_TWN	F	0:06:49.906-0:06:50.172	CS3b	0.00332279	8	0.012448
Trial 1	1.1	S_TWN	F	0:06:50.172-0:06:50.438	IT3	0.00332279	8	0.012448
Trial 1	1.1	S_TWN	F	0:06:50.438-0:06:50.704	IT3	0.00332279	8	0.012448
Trial 1	1.1	S_TWN	F	0:06:50.704-0:06:50.970	IT3	0.00332279	8	0.012448
Trial 1	1.1	S_TWN	F	0:06:50.970-0:06:51.236	IT3	0.00332279	8	0.012448
Trial 1	1.1	S_TWN	F	0:06:51.236-0:06:51.502	IT3	0.00332279	8	0.012448
Trial 1	1.1	S_TWN	F	0:06:51.502-0:06:51.768	IT3	0.00332279	8	0.012448
Trial 1	1.1	S_TWN	F	0:06:51.768-0:06:52.034	IT3	0.00332279	8	0.012448
Trial 1	1.1	S_TWN	F	0:06:52.034-0:06:52.300	IT3	0.00332279	8	0.012448
Trial 1	1.1	S_TWN	F	0:06:52.300-0:06:52.566	IT3	0.00332279	8	0.012448
Trial 1	1.1	S_TWN	F	0:06:52.566-0:06:52.832	IT3	0.00332279	8	0.012448
Trial 1	1.1	S_TWN	F	0:06:52.832-0:06:53.098	IT3	0.00332279	8	0.012448
Trial 1	1.1	S_TWN	F	0:06:53.098-0:06:53.364	IT3	0.00332279	8	0.012448
Trial 1	1.1	S_TWN	F	0:06:53.364-0:06:53.630	IT3	0.00332279	8	0.012448
Trial 1	1.1	S_TWN	F	0:06:53.630-0:06:53.896	IT3	0.00332279	8	0.012448
Trial 1	1.1	S_TWN	F	0:06:53.896-0:06:54.162	IT3	0.00332279	8	0.012448
Trial 1	1.1	S_TWN	F	0:06:54.162-0:06:54.428	IT3	0.00332279	8	0.012448
Trial 1	1.1	S_TWN	F	0:06:54.428-0:06:54.694	IT3	0.00332279	8	0.012448
Trial 1	1.1	S_TWN	F	0:06:54.694-0:06:54.960	IT3	0.00332279	8	0.012448
Trial 1	1.1	S_TWN	F	0:06:54.960-0:06:55.226	IT3	0.00332279	8	0.012448
Trial 1	1.1	S_TWN	F	0:06:55.226-0:06:55.492	IT3	0.00332279	8	0.012448
Trial 1	1.1	S_TWN	F	0:06:55.492-0:06:55.758	IT3	0.00332279	8	0.012448
Trial 1	1.1	S_TWN	F	0:06:55.758-0:06:56.024	IT3	0.00332279	8	0.012448
Trial 1	1.1	S_TWN	F	0:06:56.024-0:06:56.290	IT3	0.00332279	8	0.012448
Trial 1	1.1	S_TWN	F	0:06:56.290-0:06:56.556	IT3	0.00332279	8	0.012448
Trial 1	1.1	S_TWN	F	0:06:56.556-0:06:56.822	IT3	0.00332279	8	0.012448
Trial 1	1.1	S_TWN	F	0:06:56.822-0:06:57.088	IT3	0.00332279	8	0.012448
Trial 1	1.1	S_TWN	F	0:06:57.088-0:06:57.354	IT3	0.00332279	8	0.012448
Trial 1	1.1	S_TWN	F	0:06:57.354-0:06:57.620	IT3	0.00332279	8	0.012448
Trial 1	1.1	S_TWN	F	0:06:57.620-0:06:57.886	IT3	0.00332279	8	0.012448
Trial 1	1.1	S_TWN	F	0:06:57.886-0:06:58.152	IT3	0.00332279	8	0.012448
Trial 1	1.1	S_TWN	F	0:06:58.152-0:06:58.418	IT3	0.00290744	7	0.012448
Trial 1	1.1	S_TWN	F	0:06:58.418-0:06:58.684	IT3	0.00332279	8	0.012448
Trial 1	1.1	S_TWN	F	0:06:58.684-0:06:58.950	IT3	0.00332279	8	0.012448
Trial 1	1.1	S_TWN	F	0:06:58.950-0:06:59.216	IT3	0.00332279	8	0.012448
Trial 1	1.1	S_TWN	F	0:06:59.216-0:06:59.482	IT3	0.00332279	8	0.012448
Trial 1	1.1	S_TWN	F	0:06:59.482-0:06:59.748	IT3	0.00332279	8	0.012448
Trial 1	1.1	S_TWN	F	0:06:59.748-0:07:00.014	IT3	0.00332279	8	0.012448
Trial 1	1.1	S_TWN	F	0:07:00.014-0:07:00.280	IT3	0.00332279	8	0.012448
Trial 1	1.1	S_TWN	F	0:07:00.280-0:07:00.546	IT3	0.00332279	8	0.012448
Trial 1	1.1	S_TWN	F	0:07:00.546-0:07:00.812	IT3	0.00332279	8	0.012448
Trial 1	1.1	S_TWN	F	0:07:00.812-0:07:01.078	IT3	0.00332279	8	0.012448
Trial 1	1.1	S_TWN	F	0:07:01.078-0:07:01.344	IT3	0.00332279	8	0.012448
Trial 1	1.1	S_TWN	F	0:07:01.344-0:07:01.610	IT3	0.00332279	8	0.012448
Trial 1	1.1	S_TWN	F	0:07:01.610-0:07:01.876	IT3	0.00332279	8	0.012448
Trial 1	1.1	S_TWN	F	0:07:01.876-0:07:02.142	IT3	0.00332279	8	0.012448
Trial 1	1.1	S_TWN	F	0:07:02.142-0:07:02.408	IT3	0.00332279	8	0.012448
Trial 1	1.1	S_TWN	F	0:07:02.408-0:07:02.674	IT3	0.00332279	8	0.012448
Trial 1	1.1	S_TWN	F	0:07:02.674-0:07:02.940	IT3	0.00332279	8	0.012448
Trial 1	1.1	S_TWN	F	0:07:02.940-0:07:03.206	IT3	0.00332279	8	0.012448
Trial 1	1.1	S_TWN	F	0:07:03.206-0:07:03.472	IT3	0.00332279	8	0.012448
Trial 1	1.1	S_TWN	F	0:07:03.472-0:07:03.738	IT3	0.00332279	8	0.012448
Trial 1	1.1	S_TWN	F	0:07:03.738-0:07:04.004	IT3	0.00332279	8	0.012448
Trial 1	1.1	S_TWN	F	0:07:04.004-0:07:04.270	IT3	0.00332279	8	0.012448
Trial 1	1.1	S_TWN	F	0:07:04.270-0:07:04.536	IT3	0.00332279	8	0.012448
Trial 1	1.1	S_TWN	F	0:07:04.536-0:07:04.802	IT3	0.00332279	8	0.012448
Trial 1	1.1	S_TWN	F	0:07:04.802-0:07:05.068	IT3	0.00332279	8	0.012448
Trial 1	1.1	S_TWN	F	0:07:05.068-0:07:05.334	IT3	0.00332279	8	0.012448
Trial 1	1.1	S_TWN	F	0:07:05.334-0:07:05.600	IT3	0.00332279	8	0.012448
Trial 1	1.1	S_TWN	F	0:07:05.600-0:07:05.866	IT3	0.00332279	8	0.012448
Trial 1	1.1	S_TWN	F	0:07:05.866-0:07:06.132	IT3	0.00332279	8	0.012448
Trial 1	1.1	S_TWN	F	0:07:06.132-0:07:06.398	IT3	0.00332279	8	0.012448
Trial 1	1.1	S_TWN	F	0:07:06.398-0:07:06.664	IT3	0.00332279	8	0.012448
Trial 1	1.1	S_TWN	F	0:07:06.664-0:07:06.930	IT3	0.00332279	8	0.012448
Trial 1	1.1	S_TWN	F	0:07:06.930-0:07:07.196	IT3	0.00332279	8	0.012448
Trial 1	1.1	S_TWN	F	0:07:07.196-0:07:07.462	IT3	0.00332279	8	0.012448
Trial 1	1.1	S_TWN	F	0:07:07.462-0:07:07.728	IT3	0.00332279	8	0.012448
Trial 1	1.1	S_TWN	F	0:07:07.728-0:07:07.994	IT3	0.00290744	7	0.012448
Trial 1	1.1	S_TWN	F	0:07:07.994-0:07:08.260	IT3	0.00332279	8	0.012448
Trial 1	1.1	S_TWN	F	0:07:08.260-0:07:08.526	IT3	0.00332279	8	0.012448
Trial 1	1.1	S_TWN	F	0:07:08.526-0:07:08.792	IT3	0.00332279	8	0.012448
Trial 1	1.1	S_TWN	F	0:07:08.792-0:07:09.058	IT3	0.00332279	8	0.012448
Trial 1	1.1	S_TWN	F	0:07:09.058-0:07:09.324	IT3	0.00332279	8	0.012448
Trial 1	1.1	S_TWN	F	0:07:09.324-0:07:09.590	IT3	0.00332279	8	0.012448
Trial 1	1.1	S_TWN	F	0:07:09.590-0:07:09.856	IT3	0.00332279	8	0.012448
Trial 1	1.1	S_TWN	F	0:07:09.856-0:07:10.122	IT3	0.00332279	8	0.012448
Trial 1	1.1	S_TWN	F	0:07:10.122-0:07:10.388	IT3	0.00332279	8	0.012448
Trial 1	1.1	S_TWN	F	0:07:10.388-0:07:10.654	IT3	0.00332279	8	0.012448
Trial 1	1.1	S_TWN	F	0:07:10.654-0:07:10.920	IT3	0.00332279	8	0.012448
Trial 1	1.1	S_TWN	F	0:07:10.920-0:07:11.186	IT3	0.00332279	8	0.012448
Trial 1	1.1	S_TWN	F	0:07:11.186-0:07:11.452	IT3	0.00332279	8	0.012448
Trial 1	1.1	S_TWN	F	0:07:11.452-0:07:11.718	IT3	0.00332279	8	0.012448
Trial 1	1.1	S_TWN	F	0:07:11.718-0:07:11.984	IT3	0.00332279	8	0.012448
Trial 1	1.1	S_TWN	F	0:07:11.984-0:07:12.250	IT3	0.00332279	8	0.012448
Trial 1	1.1	S_TWN	F	0:07:12.250-0:07:12.516	IT3	0.00332279	8	0.012448
Trial 1	1.1	S_TWN	F	0:07:12.516-0:07:12.782	IT3	0.00332279	8	0.012448
Trial 1	1.1	S_TWN	F	0:07:12.782-0:07:13.048	IT3	0.00332279	8	0.012448
Trial 1	1.1	S_TWN	F	0:07:13.048-0:07:13.314	IT3	0.00332279	8	0.012448
Trial 1	1.1	S_TWN	F	0:07:13.314-0:07:13.580	IT3	0.00332279	8	0.012448
Trial 1	1.1	S_TWN	F	0:07:13.580-0:07:13.846	IT3	0.00332279	8	0.012448
Trial 1	1.1	S_TWN	F	0:07:13.846-0:07:14.112	IT3	0.00332279	8	0.012448
Trial 1	1.1	S_TWN	F	0:07:14.112-0:07:14.378	IT3	0.00332279	8	0.012448
Trial 1	1.1	S_TWN	F	0:07:14.378-0:07:14.644	IT3	0.00332279	8	0.012448
Trial 1	1.1	S_TWN	F	0:07:14.644-0:07:14.910	IT3	0.00332279	8	0.012448
Trial 1	1.1	S_TWN	F	0:07:14.910-0:07:15.176	IT3	0.00332279	8	0.012448
Trial 1	1.1	S_TWN	F	0:07:15.176-0:07:15.442	IT3	0.00332279	8	0.012448
Trial 1	1.1	S_TWN	F	0:07:15.442-0:07:15.708	IT3	0.00332279	8	0.012448
Trial 1	1.1	S_TWN	F	0:07:15.708-0:07:15.974	IT3	0.00332279	8	0.012448
Trial 1	1.1	S_TWN	F	0:07:15.974-0:07:16.240	IT3	0.00332279	8	0.012448
Trial 1	1.1	S_TWN	F	0:07:16.240-0:07:16.506	IT3	0.00332279	8	0.012448
Trial 1	1.1	S_TWN	F	0:07:16.506-0:07:16.772	IT3	0.00332279	8	0.012448
Trial 1	1.1	S_TWN	F	0:07:16.772-0:07:17.038	IT3	0.00332279	8	0.012448
Trial 1	1.1	S_TWN	F	0:07:17.038-0:07:17.304	IT3	0.00332279	8	0.012448
Trial 1	1.1	S_TWN	F	0:07:17.304-0:07:17.570	IT3	0.00290744	7	0.012448
Trial 1	1.1	S_TWN	F	0:07:17.570-0:07:17.836	IT3	0.00332279	8	0.012448
Trial 1	1.1	S_TWN	F	0:07:17.836-0:07:18.102	IT3	0.00332279	8	0.012448
Trial 1	1.1	S_TWN	F	0:07:18.102-0:07:18.368	IT3	0.00332279	8	0.012448
Trial 1	1.1	S_TWN	F	0:07:18.368-0:07:18.634	IT3	0.00332279	8	0.012448
Trial 1	1.1	S_TWN	F	0:07:18.634-0:07:18.900	IT3	0.00332279	8	0.012448
Trial 1	1.1	S_TWN	F	0:07:18.900-0:07:19.166	IT3	0.00332279	8	0.012448
Trial 1	1.1	S_TWN	F	0:07:19.166-0:07:19.432	IT3	0.00332279	8	0.012448
Trial 1	1.1	S_TWN	F	0:07:19.432-0:07:19.698	IT3	0.00332279	8	0.012448
Trial 1	1.1	S_TWN	F	0:07:19.698-0:07:19.964	IT3	0.00332279	8	0.012448
Trial 1	1.1	S_TWN	F	0:07:19.964-0:07:20.230	IT3	0.00332279	8	0.012448
Trial 1	1.1	S_TWN	F	0:07:20.230-0:07:20.496	IT3	0.00332279	8	0.012448
Trial 1	1.1	S_TWN	F	0:07:20.496-0:07:20.762	IT3	0.00332279	8	0.012448
Trial 1	1.1	S_TWN	F	0:07:20.762-0:07:21.028	IT3	0.00332279	8	0.012448
Trial 1	1.1	S_TWN	F	0:07:21.028-0:07:21.294	IT3	0.00332279	8	0.012448
Trial 1	1.1	S_TWN	F	0:07:21.294-0:07:21.560	IT3	0.00332279	8	0.012448
Trial 1	1.1	S_TWN	F	0:07:21.560-0:07:21.826	IT3	0.00332279	8	0.012448
Trial 1	1.1	S_TWN	F	0:07:21.826-0:07:22.092	IT3	0.00332279	8	0.012448
Trial 1	1.1	S_TWN	F	0:07:22.092-0:07:22.358	IT3	0.00332279	8	0.012448
Trial 1	1.1	S_TWN	F	0:07:22.358-0:07:22.624	IT3	0.00332279	8	0.012448
Trial 1	1.1	S_TWN	F	0:07:22.624-0:07:22.890	IT3	0.00332279	8	0.012448
Trial 1	1.1	S_TWN	F	0:07:22.890-0:07:23.156	IT3	0.00332279	8	0.012448
Trial 1	1.1	S_TWN	F	0:07:23.156-0:07:23.422	IT3	0.00332279	8	0.012448
Trial 1	1.1	S_TWN	F	0:07:23.422-0:07:23.688	IT3	0.00332279	8	0.012448
Trial 1	1.1	S_TWN	F	0:07:23.688-0:07:23.954	IT3	0.00332279	8	0.012448
Trial 1	1.1	S_TWN	F	0:07:23.954-0:07:24.220	IT3	0.00332279	8	0.012448
Trial 1	1.1	S_TWN	F	0:07:24.220-0:07:24.486	IT3	0.00332279	8	0.012448
Trial 1	1.1	S_TWN	F	0:07:24.486-0:07:24.752	IT3	0.00332279	8	0.012448
Trial 1	1.1	S_TWN	F	0:07:24.752-0:07:25.018	IT3	0.00332279	8	0.012448
Trial 1	1.1	S_TWN	F	0:07:25.018-0:07:25.284	IT3	0.00332279	8	0.012448
Trial 1	1.1	S_TWN	F	0:07:25.284-0:07:25.550	IT3	0.00332279	8	0.012448
Trial 1	1.1	S_TWN	F	0:07:25.550-0:07:25.816	IT3	0.00332279	8	0.012448
Trial 1	1.1	S_TWN	F	0:07:25.816-0:07:26.082	IT3	0.00332279	8	0.012448
Trial 1	1.1	S_TWN	F	0:07:26.082-0:07:26.348	IT3	0.00332279	8	0.012448
Trial 1	1.1	S_TWN	F	0:07:26.348-0:07:26.614	IT3	0.00332279	8	0.012448
Trial 1	1.1	S_TWN	F	0:07:26.614-0:07:26.880	IT3	0.00290744	7	0.012448
Trial 1	1.1	S_TWN	F	0:07:26.880-0:07:27.146	IT3	0.00332279	8	0.012448
Trial 1	1.1	S_TWN	F	0:07:27.146-0:07:27.412	IT3	0.00332279	8	0.012448
Trial 1	1.1	S_TWN	F	0:07:27.412-0:07:27.678	IT3	0.00332279	8	0.012448
Trial 1	1.1	S_TWN	F	0:07:27.678-0:07:27.944	IT3	0.00332279	8	0.012448
Trial 1	1.1	S_TWN	F	0:07:27.944-0:07:28.210	IT3	0.00332279	8	0.012448
Trial 1	1.1	S_TWN	F	0:07:28.210-0:07:28.476	IT3	0.00332279	8	0.012448
Trial 1	1.1	S_TWN	F	0:07:28.476-0:07:28.742	IT3	0.00332279	8	0.012448
Trial 1	1.1	S_TWN	F	0:07:28.742-0:07:29.008	IT3	0.00332279	8	0.012448
Trial 1	1.1	S_TWN	F	0:07:29.008-0:07:29.274	IT3	0.00332279	8	0.012448
Trial 1	1.1	S_TWN	F	0:07:29.274-0:07:29.540	IT3	0.00332279	8	0.012448
Trial 1	1.1	S_TWN	F	0:07:29.540-0:07:29.806	IT3	0.00332279	8	0.012448
Trial 1	1.1	S_TWN	F	0:07:29.806-0:07:30.072	IT3	0.00332279	8	0.012448
Trial 1	1.1	S_TWN	F	0:07:30.072-0:07:30.338	IT3	0.00332279	8	0.012448
Trial 1	1.1	S_TWN	F	0:07:30.338-0:07:30.604	IT3	0.00332279	8	0.012448
Trial 1	1.1	S_TWN	F	0:07:30.604-0:07:30.870	IT3	0.00332279	8	0.012448
Trial 1	1.1	S_TWN	F	0:07:30.870-0:07:31.136	IT3	0.00332279	8	0.012448
Trial 1	1.1	S_TWN	F	0:07:31.136-0:07:31.402	IT3	0.00332279	8	0.012448
Trial 1	1.1	S_TWN	F	0:07:31.402-0:07:31.668	IT3	0.00332279	8	0.012448
Trial 1	1.1	S_TWN	F	0:07:31.668-0:07:31.934	IT3	0.00332279	8	0.012448
Trial 1	1.1	S_TWN	F	0:07:31.934-0:07:32.200	IT3	0.00332279	8	0.012448
Trial 1	1.1	S_TWN	F	0:07:32.200-0:07:32.466	IT3	0.00332279	8	0.012448
Trial 1	1.1	S_TWN	F	0:07:32.466-0:07:32.732	IT3	0.00332279	8	0.012448
Trial 1	1.1	S_TWN	F	0:07:32.732-0:07:32.998	IT3	0.00332279	8	0.012448
Trial 1	1.1	S_TWN	F	0:07:32.998-0:07:33.264	IT3	0.00332279	8	0.012448
Trial 1	1.1	S_TWN	F	0:07:33.264-0:07:33.530	IT3	0.00332279	8	0.012448
Trial 1	1.1	S_TWN	F	0:07:33.530-0:07:33.796	IT3	0.00332279	8	0.012448
Trial 1	1.1	S_TWN	F	0:07:33.796-0:07:34.062	IT3	0.00332279	8	0.012448
Trial 1	1.1	S_TWN	F	0:07:34.062-0:07:34.328	IT3	0.00332279	8	0.012448
Trial 1	1.1	S_TWN	F	0:07:34.328-0:07:34.594	IT3	0.00332279	8	0.012448
Trial 1	1.1	S_TWN	F	0:07:34.594-0:07:34.860	IT3	0.00332279	8	0.012448
Trial 1	1.1	S_TWN	F	0:07:34.860-0:07:35.126	IT3	0.00332279	8	0.012448
Trial 1	1.1	S_TWN	F	0:07:35.126-0:07:35.392	IT3	0.00332279	8	0.012448
Trial 1	1.1	S_TWN	F	0:07:35.392-0:07:35.658	IT3	0.00332279	8	0.012448
Trial 1	1.1	S_TWN	F	0:07:35.658-0:07:35.924	IT3	0.00332279	8	0.012448
Trial 1	1.1	S_TWN	F	0:07:35.924-0:07:36.190	IT3	0.00332279	8	0.012448
Trial 1	1.1	S_TWN	F	0:07:36.190-0:07:36.456	IT3	0.00290744	7	0.012448
Trial 1	1.1	S_TWN	F	0:07:36.456-0:07:36.722	IT3	0.00332279	8	0.012448
Trial 1	1.1	S_TWN	F	0:07:36.722-0:07:36.988	IT3	0.00332279	8	0.012448
Trial 1	1.1	S_TWN	F	0:07:36.988-0:07:37.254	IT3	0.00332279	8	0.012448
Trial 1	1.1	S_TWN	F	0:07:37.254-0:07:37.520	IT3	0.00332279	8	0.012448
Trial 1	1.1	S_TWN	F	0:07:37.520-0:07:37.786	IT3	0.00332279	8	0.012448
Trial 1	1.1	S_TWN	F	0:07:37.786-0:07:38.052	IT3	0.00332279	8	0.012448
Trial 1	1.1	S_TWN	F	0:07:38.052-0:07:38.318	IT3	0.00332279	8	0.012448
Trial 1	1.1	S_TWN	F	0:07:38.318-0:07:38.584	IT3	0.00332279	8	0.012448
Trial 1	1.1	S_TWN	F	0:07:38.584-0:07:38.850	IT3	0.00332279	8	0.012448
Trial 1	1.1	S_TWN	F	0:07:38.850-0:07:39.116	IT3	0.00332279	8	0.012448
Trial 1	1.1	S_TWN	F	0:07:39.116-0:07:39.382	IT3	0.00332279	8	0.012448
Trial 1	1.1	S_TWN	F	0:07:39.382-0:07:39.648	IT3	0.00332279	8	0.012448
Trial 1	1.1	S_TWN	F	0:07:39.648-0:07:39.914	IT3	0.00332279	8	0.012448
Trial 1	1.1	S_TWN	F	0:07:39.914-0:07:40.180	IT3	0.00332279	8	0.012448
Trial 1	1.1	S_TWN	F	0:07:40.180-0:07:40.446	IT3	0.00332279	8	0.012448
Trial 1	1.1	S_TWN	F	0:07:40.446-0:07:40.712	IT3	0.00332279	8	0.012448
Trial 1	1.1	S_TWN	F	0:07:40.712-0:07:40.978	IT3	0.00332279	8	0.012448
Trial 1	1.1	S_TWN	F	0:07:40.978-0:07:41.244	IT3	0.00332279	8	0.012448
Trial 1	1.1	S_TWN	F	0:07:41.244-0:07:41.510	IT3	0.00332279	8	0.012448
Trial 1	1.1	S_TWN	F	0:07:41.510-0:07:41.776	IT3	0.00332279	8	0.012448
Trial 1	1.1	S_TWN	F	0:07:41.776-0:07:42.042	IT3	0.00332279	8	0.012448
Trial 1	1.1	S_TWN	F	0:07:42.042-0:07:42.308	IT3	0.00332279	8	0.012448
Trial 1	1.1	S_TWN	F	0:07:42.308-0:07:42.574	IT3	0.00332279	8	0.012448
Trial 1	1.1	S_TWN	F	0:07:42.574-0:07:42.840	IT3	0.00332279	8	0.012448
Trial 1	1.1	S_TWN	F	0:07:42.840-0:07:43.106	IT3	0.00332279	8	0.012448
Trial 1	1.1	S_TWN	F	0:07:43.106-0:07:43.372	IT3	0.00332279	8	0.012448
Trial 1	1.1	S_TWN	F	0:07:43.372-0:07:43.638	IT3	0.00332279	8	0.012448
Trial 1	1.1	S_TWN	F	0:07:43.638-0:07:43.904	IT3	0.00332279	8	0.012448
Trial 1	1.1	S_TWN	F	0:07:43.904-0:07:44.170	IT3	0.00332279	8	0.012448
Trial 1	1.1	S_TWN	F	0:07:44.170-0:07:44.436	IT3	0.00332279	8	0.012448
Trial 1	1.1	S_TWN	F	0:07:44.436-0:07:44.702	IT3	0.00332279	8	0.012448
Trial 1	1.1	S_TWN	F	0:07:44.702-0:07:44.968	IT3	0.00332279	8	0.012448
Trial 1	1.1	S_TWN	F	0:07:44.968-0:07:45.234	IT3	0.00332279	8	0.012448
Trial 1	1.1	S_TWN	F	0:07:45.234-0:07:45.500	IT3	0.00332279	8	0.012448
Trial 1	1.1	S_TWN	F	0:07:45.500-0:07:45.766	IT3	0.00332279	8	0.012448
Trial 1	1.1	S_TWN	F	0:07:45.766-0:07:46.032	IT3	0.00290744	7	0.012448
Trial 1	1.1	S_TWN	F	0:07:46.032-0:07:46.298	IT3	0.00332279	8	0.012448
Trial 1	1.1	S_TWN	F	0:07:46.298-0:07:46.564	IT3	0.00332279	8	0.012448
Trial 1	1.1	S_TWN	F	0:07:46.564-0:07:46.830	IT3	0.00332279	8	0.012448
Trial 1	1.1	S_TWN	F	0:07:46.830-0:07:47.096	IT3	0.00332279	8	0.012448
Trial 1	1.1	S_TWN	F	0:07:47.096-0:07:47.362	IT3	0.00332279	8	0.012448
Trial 1	1.1	S_TWN	F	0:07:47.362-0:07:47.628	IT3	0.00332279	8	0.012448
Trial 1	1.1	S_TWN	F	0:07:47.628-0:07:47.894	IT3	0.00332279	8	0.012448
Trial 1	1.1	S_TWN	F	0:07:47.894-0:07:48.160	IT3	0.00332279	8	0.012448
Trial 1	1.1	S_TWN	F	0:07:48.160-0:07:48.426	IT3	0.00332279	8	0.012448
Trial 1	1.1	S_TWN	F	0:07:48.426-0:07:48.692	IT3	0.00332279	8	0.012448
Trial 1	1.1	S_TWN	F	0:07:48.692-0:07:48.958	IT3	0.00332279	8	0.012448
Trial 1	1.1	S_TWN	F	0:07:48.958-0:07:49.224	IT3	0.00332279	8	0.012448
Trial 1	1.1	S_TWN	F	0:07:49.224-0:07:49.490	IT3	0.00332279	8	0.012448
Trial 1	1.1	S_TWN	F	0:07:49.490-0:07:49.756	IT3	0.00332279	8	0.012448
Trial 1	1.1	S_TWN	F	0:07:49.756-0:07:50.022	IT3	0.00332279	8	0.012448
Trial 1	1.1	S_TWN	F	0:07:50.022-0:07:50.288	IT3	0.00332279	8	0.012448
Trial 1	1.1	S_TWN	F	0:07:50.288-0:07:50.554	IT3	0.00332279	8	0.012448
Trial 1	1.1	S_TWN	F	0:07:50.554-0:07:50.820	IT3	0.00332279	8	0.012448
Trial 1	1.1	S_TWN	F	0:07:50.820-0:07:51.086	IT3	0.00332279	8	0.012448
Trial 1	1.1	S_TWN	F	0:07:51.086-0:07:51.352	IT3	0.00332279	8	0.012448
Trial 1	1.1	S_TWN	F	0:07:51.352-0:07:51.618	IT3	0.00332279	8	0.012448
Trial 1	1.1	S_TWN	F	0:07:51.618-0:07:51.884	IT3	0.00332279	8	0.012448
Trial 1	1.1	S_TWN	F	0:07:51.884-0:07:52.150	IT3	0.00332279	8	0.012448
Trial 1	1.1	S_TWN	F	0:07:52.150-0:07:52.416	IT3	0.00332279	8	0.012448
Trial 1	1.1	S_TWN	F	0:07:52.416-0:07:52.682	IT3	0.00332279	8	0.012448
Trial 1	1.1	S_TWN	F	0:07:52.682-0:07:52.948	IT3	0.00332279	8	0.012448
Trial 1	1.1	S_TWN	F	0:07:52.948-0:07:53.214	IT3	0.00332279	8	0.012448
Trial 1	1.1	S_TWN	F	0:07:53.214-0:07:53.480	IT3	0.00332279	8	0.012448
Trial 1	1.1	S_TWN	F	0:07:53.480-0:07:53.746	IT3	0.00332279	8	0.012448
Trial 1	1.1	S_TWN	F	0:07:53.746-0:07:54.012	IT3	0.00332279	8	0.012448
Trial 1	1.1	S_TWN	F	0:07:54.012-0:07:54.278	IT3	0.00332279	8	0.012448
Trial 1	1.1	S_TWN	F	0:07:54.278-0:07:54.544	IT3	0.00332279	8	0.012448
Trial 1	1.1	S_TWN	F	0:07:54.544-0:07:54.810	IT3	0.00332279	8	0.012448
Trial 1	1.1	S_TWN	F	0:07:54.810-0:07:55.076	IT3	0.00332279	8	0.012448
Trial 1	1.1	S_TWN	F	0:07:55.076-0:07:55.342	IT3	0.00290744	7	0.012448
Trial 1	1.1	S_TWN	F	0:07:55.342-0:07:55.608	IT3	0.00332279	8	0.012448
Trial 1	1.1	S_TWN	F	0:07:55.608-0:07:55.874	IT3	0.00332279	8	0.012448
Trial 1	1.1	S_TWN	F	0:07:55.874-0:07:56.140	IT3	0.00332279	8	0.012448
Trial 1	1.1	S_TWN	F	0:07:56.140-0:07:56.406	IT3	0.00332279	8	0.012448
Trial 1	1.1	S_TWN	F	0:07:56.406-0:07:56.672	IT3	0.00332279	8	0.012448
Trial 1	1.1	S_TWN	F	0:07:56.672-0:07:56.938	IT3	0.00332279	8	0.012448
Trial 1	1.1	S_TWN	F	0:07:56.938-0:07:57.204	IT3	0.00332279	8	0.012448
Trial 1	1.1	S_TWN	F	0:07:57.204-0:07:57.470	IT3	0.00332279	8	0.012448
Trial 1	1.1	S_TWN	F	0:07:57.470-0:07:57.736	IT3	0.00332279	8	0.012448
Trial 1	1.1	S_TWN	F	0:07:57.736-0:07:58.002	IT3	0.00332279	8	0.012448
Trial 1	1.1	S_TWN	F	0:07:58.002-0:07:58.268	IT3	0.00332279	8	0.012448
Trial 1	1.1	S_TWN	F	0:07:58.268-0:07:58.534	IT3	0.00332279	8	0.012448
Trial 1	1.1	S_TWN	F	0:07:58.534-0:07:58.800	IT3	0.00332279	8	0.012448
Trial 1	1.1	S_TWN	F	0:07:58.800-0:07:59.066	IT3	0.00332279	8	0.012448
Trial 1	1.1	S_TWN	F	0:07:59.066-0:07:59.332	IT3	0.00332279	8	0.012448
Trial 1	1.1	S_TWN	F	0:07:59.332-0:07:59.598	IT3	0.00332279	8	0.012448
Trial 1	1.1	S_TWN	F	0:07:59.598-0:07:59.864	IT3	0.00332279	8	0.012448
Trial 1	1.1	S_TWN	F	0:07:59.864-0:08:00.130	IT3	0.00332279	8	0.012448
Trial 1	1.1	S_TWN	F	0:08:00.130-0:08:00.396	IT3	0.00332279	8	0.012448
Trial 1	1.1	S_TWN	F	0:08:00.396-0:08:00.662	IT3	0.00332279	8	0.012448
Trial 1	1.1	S_TWN	F	0:08:00.662-0:08:00.928	IT3	0.00332279	8	0.012448
Trial 1	1.1	S_TWN	F	0:08:00.928-0:08:01.194	IT3	0.00332279	8	0.012448
Trial 1	1.1	S_TWN	F	0:08:01.194-0:08:01.460	IT3	0.00332279	8	0.012448
Trial 1	1.1	S_TWN	F	0:08:01.460-0:08:01.726	IT3	0.00332279	8	0.012448
Trial 1	1.1	S_TWN	F	0:08:01.726-0:08:01.992	IT3	0.00332279	8	0.012448
Trial 1	1.1	S_TWN	F	0:08:01.992-0:08:02.258	IT3	0.00332279	8	0.012448
Trial 1	1.1	S_TWN	F	0:08:02.258-0:08:02.524	IT3	0.00332279	8	0.012448
Trial 1	1.1	S_TWN	F	0:08:02.524-0:08:02.790	IT3	0.00332279	8	0.012448
Trial 1	1.1	S_TWN	F	0:08:02.790-0:08:03.056	IT3	0.00332279	8	0.012448
Trial 1	1.1	S_TWN	F	0:08:03.056-0:08:03.322	IT3	0.00332279	8	0.012448
Trial 1	1.1	S_TWN	F	0:08:03.322-0:08:03.588	IT3	0.00332279	8	0.012448
Trial 1	1.1	S_TWN	F	0:08:03.588-0:08:03.854	IT3	0.00332279	8	0.012448
Trial 1	1.1	S_TWN	F	0:08:03.854-0:08:04.120	IT3	0.00332279	8	0.012448
Trial 1	1.1	S_TWN	F	0:08:04.120-0:08:04.386	IT3	0.00332279	8	0.012448
Trial 1	1.1	S_TWN	F	0:08:04.386-0:08:04.652	IT3	0.00332279	8	0.012448
Trial 1	1.1	S_TWN	F	0:08:04.652-0:08:04.918	IT3	0.00290744	7	0.012448
Trial 1	1.1	S_TWN	F	0:08:04.918-0:08:05.184	IT3	0.00332279	8	0.012448
Trial 1	1.1	S_TWN	F	0:08:05.184-0:08:05.450	IT3	0.00332279	8	0.012448
Trial 1	1.1	S_TWN	F	0:08:05.450-0:08:05.716	IT3	0.00332279	8	0.012448
Trial 1	1.1	S_TWN	F	0:08:05.716-0:08:05.982	IT3	0.00332279	8	0.012448
Trial 1	1.1	S_TWN	F	0:08:05.982-0:08:06.248	IT3	0.00332279	8	0.012448
Trial 1	1.1	S_TWN	F	0:08:06.248-0:08:06.514	IT3	0.00332279	8	0.012448
Trial 1	1.1	S_TWN	F	0:08:06.514-0:08:06.780	IT3	0.00332279	8	0.012448
Trial 1	1.1	S_TWN	F	0:08:06.780-0:08:07.046	IT3	0.00332279	8	0.012448
Trial 1	1.1	S_TWN	F	0:08:07.046-0:08:07.312	IT3	0.00332279	8	0.012448
Trial 1	1.1	S_TWN	F	0:08:07.312-0:08:07.578	IT3	0.00332279	8	0.012448
Trial 1	1.1	S_TWN	F	0:08:07.578-0:08:07.844	IT3	0.00332279	8	0.012448
Trial 1	1.1	S_TWN	F	0:08:07.844-0:08:08.110	IT3	0.00332279	8	0.012448
Trial 1	1.1	S_TWN	F	0:08:08.110-0:08:08.376	IT3	0.00332279	8	0.012448
Trial 1	1.1	S_TWN	F	0:08:08.376-0:08:08.642	IT3	0.00332279	8	0.012448
Trial 1	1.1	S_TWN	F	0:08:08.642-0:08:08.908	IT3	0.00332279	8	0.012448
Trial 1	1.1	S_TWN	F	0:08:08.908-0:08:09.174	IT3	0.00332279	8	0.012448
Trial 1	1.1	S_TWN	F	0:08:09.174-0:08:09.440	IT3	0.00332279	8	0.012448
Trial 1	1.1	S_TWN	F	0:08:09.440-0:08:09.706	IT3	0.00332279	8	0.012448
Trial 1	1.1	S_TWN	F	0:08:09.706-0:08:09.972	IT3	0.00332279	8	0.012448
Trial 1	1.1	S_TWN	F	0:08:09.972-0:08:10.238	IT3	0.00332279	8	0.012448
Trial 1	1.1	S_TWN	F	0:08:10.238-0:08:10.504	IT3	0.00332279	8	0.012448
Trial 1	1.1	S_TWN	F	0:08:10.504-0:08:10.770	IT3	0.00332279	8	0.012448
Trial 1	1.1	S_TWN	F	0:08:10.770-0:08:11.036	IT3	0.00332279	8	0.012448
Trial 1	1.1	S_TWN	F	0:08:11.036-0:08:11.302	IT3	0.00332279	8	0.012448
Trial 1	1.1	S_TWN	F	0:08:11.302-0:08:11.568	IT3	0.00332279	8	0.012448
Trial 1	1.1	S_TWN	F	0:08:11.568-0:08:11.834	IT3	0.00332279	8	0.012448
Trial 1	1.1	S_TWN	F	0:08:11.834-0:08:12.100	IT3	0.00332279	8	0.012448
Trial 1	1.1	S_TWN	F	0:08:12.100-0:08:12.366	IT3	0.00332279	8	0.012448
Trial 1	1.1	S_TWN	F	0:08:12.366-0:08:12.632	IT3	0.00332279	8	0.012448
Trial 1	1.1	S_TWN	F	0:08:12.632-0:08:12.898	IT3	0.00332279	8	0.012448
Trial 1	1.1	S_TWN	F	0:08:12.898-0:08:13.164	IT3	0.00332279	8	0.012448
Trial 1	1.1	S_TWN	F	0:08:13.164-0:08:13.430	IT3	0.00332279	8	0.012448
Trial 1	1.1	S_TWN	F	0:08:13.430-0:08:13.696	IT3	0.00332279	8	0.012448
Trial 1	1.1	S_TWN	F	0:08:13.696-0:08:13.962	IT3	0.00332279	8	0.012448
Trial 1	1.1	S_TWN	F	0:08:13.962-0:08:14.228	IT3	0.00332279	8	0.012448
Trial 1	1.1	S_TWN	F	0:08:14.228-0:08:14.494	IT3	0.00290744	7	0.012448
Trial 1	1.1	S_TWN	F	0:08:14.494-0:08:14.760	IT3	0.00332279	8	0.012448
Trial 1	1.1	S_TWN	F	0:08:14.760-0:08:15.026	IT3	0.00332279	8	0.012448
Trial 1	1.1	S_TWN	F	0:08:15.026-0:08:15.292	IT3	0.00332279	8	0.012448
Trial 1	1.1	S_TWN	F	0:08:15.292-0:08:15.558	IT3	0.00332279	8	0.012448
Trial 1	1.1	S_TWN	F	0:08:15.558-0:08:15.824	IT3	0.00332279	8	0.012448
Trial 1	1.1	S_TWN	F	0:08:15.824-0:08:16.090	IT3	0.00332279	8	0.012448
Trial 1	1.1	S_TWN	F	0:08:16.090-0:08:16.356	IT3	0.00332279	8	0.012448
Trial 1	1.1	S_TWN	F	0:08:16.356-0:08:16.622	IT3	0.00332279	8	0.012448
Trial 1	1.1	S_TWN	F	0:08:16.622-0:08:16.888	IT3	0.00332279	8	0.012448
Trial 1	1.1	S_TWN	F	0:08:16.888-0:08:17.154	IT3	0.00332279	8	0.012448
Trial 1	1.1	S_TWN	F	0:08:17.154-0:08:17.420	IT3	0.00332279	8	0.012448
Trial 1	1.1	S_TWN	F	0:08:17.420-0:08:17.686	IT3	0.00332279	8	0.012448
Trial 1	1.1	S_TWN	F	0:08:17.686-0:08:17.952	IT3	0.00332279	8	0.012448
Trial 1	1.1	S_TWN	F	0:08:17.952-0:08:18.218	IT3	0.00332279	8	0.012448
Trial 1	1.1	S_TWN	F	0:08:18.218-0:08:18.484	IT3	0.00332279	8	0.012448
Trial 1	1.1	S_TWN	F	0:08:18.484-0:08:18.750	IT3	0.00332279	8	0.012448
Trial 1	1.1	S_TWN	F	0:08:18.750-0:08:19.016	IT3	0.00332279	8	0.012448
Trial 1	1.1	S_TWN	F	0:08:19.016-0:08:19.282	IT3	0.00332279	8	0.012448
Trial 1	1.1	S_TWN	F	0:08:19.282-0:08:19.548	IT3	0.00332279	8	0.012448
Trial 1	1.1	S_TWN	F	0:08:19.548-0:08:19.814	IT3	0.00332279	8	0.012448
Trial 1	1.1	S_TWN	F	0:08:19.814-0:08:20.080	IT3	0.00332279	8	0.012448
Trial 1	1.1	S_TWN	F	0:08:20.080-0:08:20.346	IT3	0.00332279	8	0.012448
Trial 1	1.1	S_TWN	F	0:08:20.346-0:08:20.612	IT3	0.00332279	8	0.012448
Trial 1	1.1	S_TWN	F	0:08:20.612-0:08:20.878	IT3	0.00332279	8	0.012448
Trial 1	1.1	S_TWN	F	0:08:20.878-0:08:21.144	IT3	0.00332279	8	0.012448
Trial 1	1.1	S_TWN	F	0:08:21.144-0:08:21.410	IT3	0.00332279	8	0.012448
Trial 1	1.1	S_TWN	F	0:08:21.410-0:08:21.676	IT3	0.00332279	8	0.012448
Trial 1	1.1	S_TWN	F	0:08:21.676-0:08:21.942	IT3	0.00332279	8	0.012448
Trial 1	1.1	S_TWN	F	0:08:21.942-0:08:22.208	IT3	0.00332279	8	0.012448
Trial 1	1.1	S_TWN	F	0:08:22.208-0:08:22.474	IT3	0.00332279	8	0.012448
Trial 1	1.1	S_TWN	F	0:08:22.474-0:08:22.740	IT3	0.00332279	8	0.012448
Trial 1	1.1	S_TWN	F	0:08:22.740-0:08:23.006	IT3	0.00332279	8	0.012448
Trial 1	1.1	S_TWN	F	0:08:23.006-0:08:23.272	IT3	0.00332279	8	0.012448
Trial 1	1.1	S_TWN	F	0:08:23.272-0:08:23.538	IT3	0.00332279	8	0.012448
Trial 1	1.1	S_TWN	F	0:08:23.538-0:08:23.804	IT3	0.00332279	8	0.012448
Trial 1	1.1	S_TWN	F	0:08:23.804-0:08:24.070	IT3	0.00290744	7	0.012448
Trial 1	1.1	S_TWN	F	0:08:24.070-0:08:24.336	IT3	0.00332279	8	0.012448
Trial 1	1.1	S_TWN	F	0:08:24.336-0:08:24.602	IT3	0.00332279	8	0.012448
Trial 1	1.1	S_TWN	F	0:08:24.602-0:08:24.868	IT3	0.00332279	8	0.012448
Trial 1	1.1	S_TWN	F	0:08:24.868-0:08:25.134	IT3	0.00332279	8	0.012448
Trial 1	1.1	S_TWN	F	0:08:25.134-0:08:25.400	CS4a	0.00332279	8	0.012448
Trial 1	1.1	S_TWN	F	0:08:25.400-0:08:25.666	CS4a	0.00332279	8	0.012448
Trial 1	1.1	S_TWN	F	0:08:25.666-0:08:25.932	CS4a	0.00332279	8	0.012448
Trial 1	1.1	S_TWN	F	0:08:25.932-0:08:26.198	CS4a	0.00332279	8	0.012448
Trial 1	1.1	S_TWN	F	0:08:26.198-0:08:26.464	CS4a	0.00332279	8	0.012448
Trial 1	1.1	S_TWN	F	0:08:26.464-0:08:26.730	CS4a	0.00332279	8	0.012448
Trial 1	1.1	S_TWN	F	0:08:26.730-0:08:26.996	CS4a	0.00332279	8	0.012448
Trial 1	1.1	S_TWN	F	0:08:26.996-0:08:27.262	CS4a	0.00332279	8	0.012448
Trial 1	1.1	S_TWN	F	0:08:27.262-0:08:27.528	CS4a	0.00332279	8	0.012448
Trial 1	1.1	S_TWN	F	0:08:27.528-0:08:27.794	CS4a	0.00332279	8	0.012448
Trial 1	1.1	S_TWN	F	0:08:27.794-0:08:28.060	CS4a	0.00332279	8	0.012448
Trial 1	1.1	S_TWN	F	0:08:28.060-0:08:28.326	CS4a	0.00332279	8	0.012448
Trial 1	1.1	S_TWN	F	0:08:28.326-0:08:28.592	CS4a	0.00332279	8	0.012448
Trial 1	1.1	S_TWN	F	0:08:28.592-0:08:28.858	CS4a	0.00332279	8	0.012448
Trial 1	1.1	S_TWN	F	0:08:28.858-0:08:29.124	CS4a	0.00332279	8	0.012448
Trial 1	1.1	S_TWN	F	0:08:29.124-0:08:29.390	CS4a	0.00332279	8	0.012448
Trial 1	1.1	S_TWN	F	0:08:29.390-0:08:29.656	CS4a	0.00332279	8	0.012448
Trial 1	1.1	S_TWN	F	0:08:29.656-0:08:29.922	CS4a	0.00332279	8	0.012448
Trial 1	1.1	S_TWN	F	0:08:29.922-0:08:30.188	CS4a	0.00332279	8	0.012448
Trial 1	1.1	S_TWN	F	0:08:30.188-0:08:30.454	CS4a	0.00332279	8	0.012448
Trial 1	1.1	S_TWN	F	0:08:30.454-0:08:30.720	CS4a	0.00332279	8	0.012448
Trial 1	1.1	S_TWN	F	0:08:30.720-0:08:30.986	CS4a	0.00332279	8	0.012448
Trial 1	1.1	S_TWN	F	0:08:30.986-0:08:31.252	CS4a	0.00332279	8	0.012448
Trial 1	1.1	S_TWN	F	0:08:31.252-0:08:31.518	CS4a	0.00332279	8	0.012448
Trial 1	1.1	S_TWN	F	0:08:31.518-0:08:31.784	CS4a	0.00332279	8	0.012448
Trial 1	1.1	S_TWN	F	0:08:31.784-0:08:32.050	CS4a	0.00332279	8	0.012448
Trial 1	1.1	S_TWN	F	0:08:32.050-0:08:32.316	CS4a	0.00332279	8	0.012448
Trial 1	1.1	S_TWN	F	0:08:32.316-0:08:32.582	CS4a	0.00332279	8	0.012448
Trial 1	1.1	S_TWN	F	0:08:32.582-0:08:32.848	CS4a	0.00332279	8	0.012448
Trial 1	1.1	S_TWN	F	0:08:32.848-0:08:33.114	CS4a	0.00332279	8	0.012448
Trial 1	1.1	S_TWN	F	0:08:33.114-0:08:33.380	CS4a	0.00290744	7	0.012448
Trial 1	1.1	S_TWN	F	0:08:33.380-0:08:33.646	CS4a	0.00332279	8	0.012448
Trial 1	1.1	S_TWN	F	0:08:33.646-0:08:33.912	CS4a	0.00332279	8	0.012448
Trial 1	1.1	S_TWN	F	0:08:33.912-0:08:34.178	CS4a	0.00332279	8	0.012448
Trial 1	1.1	S_TWN	F	0:08:34.178-0:08:34.444	CS4a	0.00332279	8	0.012448
Trial 1	1.1	S_TWN	F	0:08:34.444-0:08:34.710	CS4a	0.00332279	8	0.012448
Trial 1	1.1	S_TWN	F	0:08:34.710-0:08:34.976	CS4a	0.00332279	8	0.012448
Trial 1	1.1	S_TWN	F	0:08:34.976-0:08:35.242	CS4a	0.00332279	8	0.012448
Trial 1	1.1	S_TWN	F	0:08:35.242-0:08:35.508	CS4b	0.00332279	8	0.012448
Trial 1	1.1	S_TWN	F	0:08:35.508-0:08:35.774	CS4b	0.00332279	8	0.012448
Trial 1	1.1	S_TWN	F	0:08:35.774-0:08:36.040	CS4b	0.00332279	8	0.012448
Trial 1	1.1	S_TWN	F	0:08:36.040-0:08:36.306	CS4b	0.00332279	8	0.012448
Trial 1	1.1	S_TWN	F	0:08:36.306-0:08:36.572	CS4b	0.00332279	8	0.012448
Trial 1	1.1	S_TWN	F	0:08:36.572-0:08:36.838	CS4b	0.00332279	8	0.012448
Trial 1	1.1	S_TWN	F	0:08:36.838-0:08:37.104	CS4b	0.00332279	8	0.012448
Trial 1	1.1	S_TWN	F	0:08:37.104-0:08:37.370	CS4b	0.00332279	8	0.012448
Trial 1	1.1	S_TWN	F	0:08:37.370-0:08:37.636	CS4b	0.00332279	8	0.012448
Trial 1	1.1	S_TWN	F	0:08:37.636-0:08:37.902	CS4b	0.00332279	8	0.012448
Trial 1	1.1	S_TWN	F	0:08:37.902-0:08:38.168	CS4b	0.00332279	8	0.012448
Trial 1	1.1	S_TWN	F	0:08:38.168-0:08:38.434	CS4b	0.00332279	8	0.012448
Trial 1	1.1	S_TWN	F	0:08:38.434-0:08:38.700	CS4b	0.00332279	8	0.012448
Trial 1	1.1	S_TWN	F	0:08:38.700-0:08:38.966	CS4b	0.00332279	8	0.012448
Trial 1	1.1	S_TWN	F	0:08:38.966-0:08:39.232	CS4b	0.00332279	8	0.012448
Trial 1	1.1	S_TWN	F	0:08:39.232-0:08:39.498	CS4b	0.00332279	8	0.012448
Trial 1	1.1	S_TWN	F	0:08:39.498-0:08:39.764	CS4b	0.00332279	8	0.012448
Trial 1	1.1	S_TWN	F	0:08:39.764-0:08:40.030	CS4b	0.00332279	8	0.012448
Trial 1	1.1	S_TWN	F	0:08:40.030-0:08:40.296	CS4b	0.00332279	8	0.012448
Trial 1	1.1	S_TWN	F	0:08:40.296-0:08:40.562	CS4b	0.00332279	8	0.012448
Trial 1	1.1	S_TWN	F	0:08:40.562-0:08:40.828	CS4b	0.00332279	8	0.012448
Trial 1	1.1	S_TWN	F	0:08:40.828-0:08:41.094	CS4b	0.00332279	8	0.012448
Trial 1	1.1	S_TWN	F	0:08:41.094-0:08:41.360	CS4b	0.00332279	8	0.012448
Trial 1	1.1	S_TWN	F	0:08:41.360-0:08:41.626	CS4b	0.00332279	8	0.012448
Trial 1	1.1	S_TWN	F	0:08:41.626-0:08:41.892	CS4b	0.00332279	8	0.012448
Trial 1	1.1	S_TWN	F	0:08:41.892-0:08:42.158	CS4b	0.00332279	8	0.012448
Trial 1	1.1	S_TWN	F	0:08:42.158-0:08:42.424	CS4b	0.00332279	8	0.012448
Trial 1	1.1	S_TWN	F	0:08:42.424-0:08:42.690	CS4b	0.00332279	8	0.012448
Trial 1	1.1	S_TWN	F	0:08:42.690-0:08:42.956	CS4b	0.00290744	7	0.012448
Trial 1	1.1	S_TWN	F	0:08:42.956-0:08:43.222	CS4b	0.00332279	8	0.012448
Trial 1	1.1	S_TWN	F	0:08:43.222-0:08:43.488	CS4b	0.00332279	8	0.012448
Trial 1	1.1	S_TWN	F	0:08:43.488-0:08:43.754	CS4b	0.00332279	8	0.012448
Trial 1	1.1	S_TWN	F	0:08:43.754-0:08:44.020	CS4b	0.00332279	8	0.012448
Trial 1	1.1	S_TWN	F	0:08:44.020-0:08:44.286	CS4b	0.00332279	8	0.012448
Trial 1	1.1	S_TWN	F	0:08:44.286-0:08:44.552	CS4b	0.00332279	8	0.012448
Trial 1	1.1	S_TWN	F	0:08:44.552-0:08:44.818	CS4b	0.00332279	8	0.012448
Trial 1	1.1	S_TWN	F	0:08:44.818-0:08:45.084	CS4b	0.00332279	8	0.012448
Trial 1	1.1	S_TWN	F	0:08:45.084-0:08:45.350	IT4	0.00332279	8	0.012448
Trial 1	1.1	S_TWN	F	0:08:45.350-0:08:45.616	IT4	0.00332279	8	0.012448
Trial 1	1.1	S_TWN	F	0:08:45.616-0:08:45.882	IT4	0.00332279	8	0.012448
Trial 1	1.1	S_TWN	F	0:08:45.882-0:08:46.148	IT4	0.00332279	8	0.012448
Trial 1	1.1	S_TWN	F	0:08:46.148-0:08:46.414	IT4	0.00332279	8	0.012448
Trial 1	1.1	S_TWN	F	0:08:46.414-0:08:46.680	IT4	0.00332279	8	0.012448
Trial 1	1.1	S_TWN	F	0:08:46.680-0:08:46.946	IT4	0.00332279	8	0.012448
Trial 1	1.1	S_TWN	F	0:08:46.946-0:08:47.212	IT4	0.00332279	8	0.012448
Trial 1	1.1	S_TWN	F	0:08:47.212-0:08:47.478	IT4	0.00332279	8	0.012448
Trial 1	1.1	S_TWN	F	0:08:47.478-0:08:47.744	IT4	0.00332279	8	0.012448
Trial 1	1.1	S_TWN	F	0:08:47.744-0:08:48.010	IT4	0.00332279	8	0.012448
Trial 1	1.1	S_TWN	F	0:08:48.010-0:08:48.276	IT4	0.00332279	8	0.012448
Trial 1	1.1	S_TWN	F	0:08:48.276-0:08:48.542	IT4	0.00332279	8	0.012448
Trial 1	1.1	S_TWN	F	0:08:48.542-0:08:48.808	IT4	0.00332279	8	0.012448
Trial 1	1.1	S_TWN	F	0:08:48.808-0:08:49.074	IT4	0.00332279	8	0.012448
Trial 1	1.1	S_TWN	F	0:08:49.074-0:08:49.340	IT4	0.00332279	8	0.012448
Trial 1	1.1	S_TWN	F	0:08:49.340-0:08:49.606	IT4	0.00332279	8	0.012448
Trial 1	1.1	S_TWN	F	0:08:49.606-0:08:49.872	IT4	0.00332279	8	0.012448
Trial 1	1.1	S_TWN	F	0:08:49.872-0:08:50.138	IT4	0.00332279	8	0.012448
Trial 1	1.1	S_TWN	F	0:08:50.138-0:08:50.404	IT4	0.00332279	8	0.012448
Trial 1	1.1	S_TWN	F	0:08:50.404-0:08:50.670	IT4	0.00332279	8	0.012448
[truncated: 224,055+ more rows]
