# Supplementary material for: Conditional and unconditional components of aversively motivated freezing, flight and darting in mice
Source: eLife. 2022 May 26;11:e75663. doi: 10.7554/eLife.75663 (PMC9173745; doi:10.7554/eLife.75663)
Supplement: Figure 6—source data 1. [file elife-75663-fig6-data1.xlsx]

## Sheet: Sheet1
Data from all groups in Experiment 3 for freezing, PAR, and darting across Day 1 and Day 2 - acquisiton and Day 3 - testing.
Grey = Data Irrelevant/Not Available
As seen in Figure 6
					Day 1						Day 2						Day 3
Experiment	Group	Measure	Sex	CS	BL	1	2	3	4	5	BL	6	7	8	9	10	BL	1	2
3	Paired	Freezing	F	Noise	0	0	50	63.33	76.33	30.33	95.63	17.33	85.67	82	69.33	47.67	94.07	37	70
3	Paired	Freezing	F	Noise	0.61	11	94.33	71.33	70	27	89.59	29.33	27.67	44.67	47.33	23	91.5	11.33	24.33
3	Paired	Freezing	F	Noise	4.5	20.67	63	30.33	27.33	70.33	75.11	45.33	84.67	50.67	95.33	79.33	90	66.67	81
3	Paired	Freezing	F	Noise	1.85	23.33	63.33	0	36	16.33	91.94	19	0	0	53.67	50	96.63	29	56.67
3	Paired	Freezing	M	Noise	0	43	83.67	83	87.33	51.33	95.94	0	47.33	73	46.33	85.67	34.69	42.67	36.33
3	Paired	Freezing	M	Noise	4.07	12.33	49	57.33	49.67	47.33	96.04	0	0	0	27	34	91.74	17.67	48.67
3	Paired	Freezing	M	Noise	0	11.67	83.33	52.33	15	59.33	96.52	18.33	15.67	10.67	57.67	44	95.3	62.67	80
3	Paired	Freezing	M	Noise	0.59	38	84.33	43.67	43	54.67	90.17	79.67	57.33	69.67	23.67	54.67	85.39	19	14.67
3	Unpaired	Freezing	F	Noise	0.78	0	43.33	90.67	51	36.33	90.24	95.67	39	0	35.33	46.33	47.43	80	48.67
3	Unpaired	Freezing	F	Noise	0.67	10.67	14.33	46.33	32.33	89.67	73.59	0	81.67	56.33	27	54.33	66.57	72.33	11.67
3	Unpaired	Freezing	F	Noise	6.85	26	16.67	55	69	79.33	88.06	0	30	90.33	0	79.33	85.67	81	86.33
3	Unpaired	Freezing	F	Noise	1.39	0	32.33	42.33	80	34	47.94	54	37.67	76.67	62.33	37.67	60.43	68.33	44.33
3	Unpaired	Freezing	M	Noise	1.17	13.67	35.67	73	56.33	70.33	68.48	0	70.67	0	41.33	62.67	70.74	63.33	77.33
3	Unpaired	Freezing	M	Noise	1.44	12.33	17	74.67	16.33	45	83.48	72.67	33	53.33	19.33	0	95.65	0	22.33
3	Unpaired	Freezing	M	Noise	18.2	24.67	30.67	24	71.33	72.67	93.26	16	13.67	0	73	53.67	94.91	35.67	10
3	Unpaired	Freezing	M	Noise	0	0	0	60.67	76.33	25.67	94.83	39.33	0	33.33	67.33	16.67	69.06	58	0
3	CS Only	Freezing	F	Noise	4.78	12.33	0	15.67	29.67	44.67	3.69	15.67	79.33	26	33.33	61.33	4.67	23	0
3	CS Only	Freezing	F	Noise	0	0	29.67	0	38.33	26	0.67	13	46.67	19.33	0	35	7.83	46	52.67
3	CS Only	Freezing	F	Noise	1.69	0	0	32.33	37.33	67	5.31	47.33	58	45.33	46	14.33	1.26	11.33	34.67
3	CS Only	Freezing	F	Noise	3.93	29.33	42.67	20.33	57	39	6.7	41.33	44.33	54.33	55	58.33	11.56	39.33	62
3	CS Only	Freezing	M	Noise	4.43	0	39.67	55.33	38	63.67	9.78	51.33	73.67	49.67	60.67	58.67	23.22	75.33	31.33
3	CS Only	Freezing	M	Noise	0	0	11.67	0	0	25.33	0.57	15	16	14	26	27.33	2.2	23	0
3	CS Only	Freezing	M	Noise	1.76	0	0	13.67	23.33	23.33	0.89	11.33	10.33	42	23	21.67	0.63	0	25.67
3	CS Only	Freezing	M	Noise	0.85	24.33	52.33	44.67	50.33	50	1.24	10.67	63.33	55.67	65.33	57.33	1.17	28.33	32.67
3	Shock Only	Freezing	F	Noise	0	0	0	73.33	100	100	79.24	12.33	100	100	100	100	91.93	61.67	0
3	Shock Only	Freezing	F	Noise	0.59	0	0	66	100	100	98.91	100	100	100	100	100	70.89	66	0
3	Shock Only	Freezing	F	Noise	6.22	0	0	93.33	91.67	100	89.83	100	100	99.67	100	99.67	81.78	87	61
3	Shock Only	Freezing	F	Noise	0.65	0	0	50	100	0	78.91	77.67	100	100	100	100	95.5	0	23
3	Shock Only	Freezing	M	Noise	10.57	0	0	95	100	100	90.24	100	100	100	97	46.67	95.33	0	0
3	Shock Only	Freezing	M	Noise	1.98	0	0	10.33	75	80	83.54	23.67	76	100	72.33	100	86.85	0	0
3	Shock Only	Freezing	M	Noise	5.85	10.67	77.33	77.33	57	100	91.67	100	100	100	100	100	88.06	30.67	0
3	Shock Only	Freezing	M	Noise	0	0	0	15.33	47.33	100	85.56	65.67	0	100	84.67	100	88.39	0	0
3	Paired	PAR	F	Noise		0.4919	0.4202	0.6417	0.6543	0.9658		1	0.588	1	0.9056	1		0.9985	0.939
3	Paired	PAR	F	Noise		0.5408	0.5	0.6666	0.9946	0.9986		0.9989	0.9978	0.9985	0.9977	0.9996		0.9358	0.9987
3	Paired	PAR	F	Noise		0.5748	0.6425	0.9214	0.8958	0.917		0.982	0.9513	0.9627	0.8376	0.9458		0.9234	0.75
3	Paired	PAR	F	Noise		0.4832	0.5573	0.9696	1	0.9763		1	0.9959	0.7854	1	1		1	0.9993
3	Paired	PAR	M	Noise		0.497	0.5126	0.6386	0.6147	1		0.9316	1	1	0.9514	1		1	0.9997
3	Paired	PAR	M	Noise		0.5308	0.9258	0.9995	0.9971	0.9996		0.9988	0.9998	0.9998	0.9997	0.9998		0.9989	1
3	Paired	PAR	M	Noise		0.5279	0.6773	0.9982	1	1		1	0.9742	1	1	1		1	1
3	Paired	PAR	M	Noise		0.5019	0.5137	0.9662	0.9998	1		0.925	0.9506	0.9494	0.9992	0.9989		0.9525	0.9511
3	Unpaired	PAR	F	Noise		0.4694	0.1921	0.3929	1	1		0.6914	1	0.7085	0.9529	0.9996		0.8038	0.8554
3	Unpaired	PAR	F	Noise		0.4678	0.5402	0.7756	0.9615	0.8066		0.9624	0.9117	0.9226	0.9986	0.9997		0.5428	0.679
3	Unpaired	PAR	F	Noise		0.4913	0.5646	0.5678	0.728	0.43		0.998	0.9945	0.9781	0.998	0.9921		0.6271	0.2014
3	Unpaired	PAR	F	Noise		0.4921	0.663	0.7569	1	1		0.8894	0.4808	0.7188	1	1		0.8938	0.4444
3	Unpaired	PAR	M	Noise		0.5817	0.3943	0.6325	0.9493	0.8504		1	1	0.3965	0.5601	0.6025		0.5688	1
3	Unpaired	PAR	M	Noise		0.4407	0.7467	0.3278	0.9577	0.8686		0.9969	0.9968	0.9988	0.9984	0.9991		0.9987	0.9852
3	Unpaired	PAR	M	Noise		0.5842	0.5316	0.9587	0.9994	0.9995		0.9993	0.979	0.9994	0.9995	0.9995		0.9989	0.9989
3	Unpaired	PAR	M	Noise		0.5674	0.6776	0.7747	0.9976	0.9994		0.9955	1	0.9505	0.999	0.7288		0.9054	0.9994
3	CS Only	PAR	F	Noise		0.723	0.663	0.467	0.3846	0.4889		0.532	0.4443	0.5959	0.5427	0.3021		0.4428	0.3946
3	CS Only	PAR	F	Noise		0.5315	0.4896	0.6298	0.5135	0.6261		0.5366	0.7052	0.683	0.5435	0.7493		0.639	0.2912
3	CS Only	PAR	F	Noise		0.5488	0.6284	0.5244	0.6477	0.541		0.569	0.2229	0.4919	0.614	0.6674		0.3927	0.7008
3	CS Only	PAR	F	Noise		0.4931	0.3295	0.7036	0.3733	0.358		0.3094	0.3731	0.4147	0.4525	0.3469		0.6817	0.3382
3	CS Only	PAR	M	Noise		0.4945	0.3488	0.3904	0.4191	0.6651		0.4577	0.3208	0.5104	0.48	0.6286		0.6321	0.4801
3	CS Only	PAR	M	Noise		0.65	0.5407	0.3233	0.5503	0.4268		0.326	0.2744	0.2731	0.3794	0.6216		0.445	0.6209
3	CS Only	PAR	M	Noise		0.4233	0.5684	0.5	0.5769	0.518		0.3698	0.687	0.5872	0.5194	0.3668		0.653	0.4854
3	CS Only	PAR	M	Noise		0.547	0.4665	0.5904	0.405	0.59		0.3081	0.4293	0.4342	0.5752	0.4306		0.5138	0.3461
3	Shock Only	PAR	F	Noise		0.4072	0.4771	0.3399	0.5	0.9967		0.4472	0.5	0.0003	0.5	0.5		0.6676	1
3	Shock Only	PAR	F	Noise		0.4049	0.4379	0.4353	0.9902	0.0098		0.5	0.8992	0.1178	0.888	0.9902		0.8733	0.8296
3	Shock Only	PAR	F	Noise		0.4725	0.4744	0.4159	0.2388	0.021		0.0504	0.5	0.5384	0.5	0.353		0.2336	0.5136
3	Shock Only	PAR	F	Noise		0.6288	0.5759	0.379	0.084	0.5024		1	0.0142	0.3344	0.5	0.5		1	1
3	Shock Only	PAR	M	Noise		0.4194	0.6524	0.2943	0.5	0.5		0.5	0.5	0.0006	0.9998	0.5869		0.9584	0.9848
3	Shock Only	PAR	M	Noise		0.4471	0.5068	0.6967	0.4515	0.5939		0.8816	0.2712	0.0703	0.5758	0.5		0.5972	0.9995
3	Shock Only	PAR	M	Noise		0.4163	0.3478	0.5294	0.5549	0.0246		0.2512	0.0083	0.1678	0.112	0.937		0.9476	0.9424
3	Shock Only	PAR	M	Noise		0.5151	0.5677	0.4705	0.7967	0.0001		0.6535	0.8658	0.5	0.1084	0.0098		1	1
3	Paired	Darting	F	Noise	4	0	0	0	0	6	0	6	0	0	6	12	0	6	6
3	Paired	Darting	F	Noise	0.666667	0	0	0	0	12	0	6	0	6	6	12	0	18	6
3	Paired	Darting	F	Noise	2.66667	6	6	6	12	0	0.333333	6	0	12	0	6	0	12	0
3	Paired	Darting	F	Noise	0	0	0	18	12	18	0.666667	18	18	12	6	18	0.333333	18	12
3	Paired	Darting	M	Noise	1.66667	6	0	0	0	12	0	24	6	0	12	0	2	12	12
3	Paired	Darting	M	Noise	0.666667	0	0	6	6	6	0	0	6	6	12	6	0.333333	18	12
3	Paired	Darting	M	Noise	1	0	6	6	6	18	0	18	18	24	12	12	0	12	12
3	Paired	Darting	M	Noise	3.66667	6	0	0	12	6	0	18	18	12	6	6	0	6	6
3	Unpaired	Darting	F	Noise	2.66667	6	0	0	6	0	0	0	6	6	6	6	1.66667	6	12
3	Unpaired	Darting	F	Noise	2.33333	0	6	6	12	0	0	12	0	6	0	6	0	0	6
3	Unpaired	Darting	F	Noise	0	0	18	0	0	0	1	12	6	0	0	6	0.333333	0	0
3	Unpaired	Darting	F	Noise	1.66667	0	0	0	0	0	1.66667	6	0	6	6	6	1.33333	12	18
3	Unpaired	Darting	M	Noise	1.33333	0	0	0	12	6	0	6	6	6	0	0	2	6	6
3	Unpaired	Darting	M	Noise	0.666667	0	0	0	0	0	0	0	0	6	0	12	0	6	6
3	Unpaired	Darting	M	Noise	0	6	6	6	6	6	0	12	0	12	6	6	0	6	6
3	Unpaired	Darting	M	Noise	2.66667	0	0	6	0	6	0	0	24	6	6	6	1	12	12
3	CS Only	Darting	F	Noise	1	0	0	6	0	0	1	0	0	6	0	0	1	6	0
3	CS Only	Darting	F	Noise	2.33333	6	6	0	0	6	0.666667	0	6	0	0	6	1.66667	0	0
3	CS Only	Darting	F	Noise	1.66667	0	6	6	0	0	0.333333	6	0	0	0	0	1.33333	0	0
3	CS Only	Darting	F	Noise	1	0	0	0	0	0	0.333333	0	0	0	0	0	1.66667	6	0
3	CS Only	Darting	M	Noise	0.666667	6	0	0	0	0	0.666667	0	0	0	0	6	0.666667	0	0
3	CS Only	Darting	M	Noise	4.66667	12	0	0	0	0	1	0	0	0	0	0	1.33333	0	0
3	CS Only	Darting	M	Noise	4	6	6	6	0	6	2.33333	0	6	0	0	0	3	6	0
3	CS Only	Darting	M	Noise	2.33333	6	0	0	0	0	1.33333	0	0	0	0	0	0.333333	0	0
3	Shock Only	Darting	F	Noise	1	6	0	0	0	0	0.333333	0	0	0	0	0	0	0	6
3	Shock Only	Darting	F	Noise	2	0	0	0	0	0	0	0	0	0	0	0	0.666667	6	12
3	Shock Only	Darting	F	Noise	1	0	0	0	0	0	0	0	0	0	0	0	0.666667	0	6
3	Shock Only	Darting	F	Noise	1.66667	0	0	0	0	0	0	0	0	0	0	0	0	6	6
3	Shock Only	Darting	M	Noise	0	0	0	0	0	0	0	0	0	0	0	0	0	12	18
3	Shock Only	Darting	M	Noise	0	0	0	0	0	0	0	0	0	0	0	0	0	0	6
3	Shock Only	Darting	M	Noise	0	0	0	0	0	0	0.333333	0	0	0	0	0	0	12	6
3	Shock Only	Darting	M	Noise	2	0	0	0	0	0	0	0	0	0	0	0	0	6	6
