# Supplementary material for: Conditional and unconditional components of aversively motivated freezing, flight and darting in mice
Source: eLife. 2022 May 26;11:e75663. doi: 10.7554/eLife.75663 (PMC9173745; doi:10.7554/eLife.75663)
Supplement: Figure 6—source data 2. [file elife-75663-fig6-data2.xlsx]

## Sheet: Day 1
Raw velocity data, extracted via ethovision, which is fed to R source code 1 to detect and extract darts, and to produce velocity traces
Showing Data from Acquisition Day 1 for all animals in Experiment 3
Used to calculate Darts/minute as seen in Figure 6
Used to produce velocity traces as seen in Figure 7
*must analyze Unpaired animals separately in R due to differences in CS timing
Trial	Animal	Group	Sex	TimeStamp	StimPeriod	Distance_cm	Samples	Velocity		Trial	Animal	Group	Sex	TimeStamp	StimPeriod	Distance_cm	Samples	Velocity
Trial 1	F1	P	F	Start-0:00:00.266	BL	1.58717	7	6.79539		Trial 1	F5	UP	F	Start-0:00:00.266	BL	2.62245	7	11.2278
Trial 1	F1	P	F	0:00:00.266-0:00:00.532	BL	0.918191	8	3.43976		Trial 1	F5	UP	F	0:00:00.266-0:00:00.532	BL	3.26893	8	12.2462
Trial 1	F1	P	F	0:00:00.532-0:00:00.798	BL	1.04328	8	3.90838		Trial 1	F5	UP	F	0:00:00.532-0:00:00.798	BL	0.994601	8	3.72602
Trial 1	F1	P	F	0:00:00.798-0:00:01.064	BL	2.49189	8	9.33526		Trial 1	F5	UP	F	0:00:00.798-0:00:01.064	BL	4.98073	8	18.659
Trial 1	F1	P	F	0:00:01.064-0:00:01.330	BL	0.732929	8	2.74573		Trial 1	F5	UP	F	0:00:01.064-0:00:01.330	BL	6.71876	8	25.1701
Trial 1	F1	P	F	0:00:01.330-0:00:01.596	BL	0.845531	8	3.16759		Trial 1	F5	UP	F	0:00:01.330-0:00:01.596	BL	2.45482	8	9.19634
Trial 1	F1	P	F	0:00:01.596-0:00:01.862	BL	1.10774	8	4.14985		Trial 1	F5	UP	F	0:00:01.596-0:00:01.862	BL	1.13778	8	4.2624
Trial 1	F1	P	F	0:00:01.862-0:00:02.128	BL	0.725315	8	2.71721		Trial 1	F5	UP	F	0:00:01.862-0:00:02.128	BL	0.488592	8	1.83037
Trial 1	F1	P	F	0:00:02.128-0:00:02.394	BL	1.60648	8	6.0183		Trial 1	F5	UP	F	0:00:02.128-0:00:02.394	BL	0.168189	8	0.630083
Trial 1	F1	P	F	0:00:02.394-0:00:02.660	BL	0.816715	8	3.05962		Trial 1	F5	UP	F	0:00:02.394-0:00:02.660	BL	0.297918	8	1.11607
Trial 1	F1	P	F	0:00:02.660-0:00:02.926	BL	1.74523	8	6.53809		Trial 1	F5	UP	F	0:00:02.660-0:00:02.926	BL	1.65194	8	6.18856
Trial 1	F1	P	F	0:00:02.926-0:00:03.192	BL	1.08174	8	4.05244		Trial 1	F5	UP	F	0:00:02.926-0:00:03.192	BL	2.5046	8	9.38286
Trial 1	F1	P	F	0:00:03.192-0:00:03.458	BL	0.857313	8	3.2117		Trial 1	F5	UP	F	0:00:03.192-0:00:03.458	BL	1.99847	8	7.48677
Trial 1	F1	P	F	0:00:03.458-0:00:03.724	BL	3.03344	8	11.364		Trial 1	F5	UP	F	0:00:03.458-0:00:03.724	BL	1.92748	8	7.22085
Trial 1	F1	P	F	0:00:03.724-0:00:03.990	BL	9.89547	8	37.0711		Trial 1	F5	UP	F	0:00:03.724-0:00:03.990	BL	1.48055	8	5.54648
Trial 1	F1	P	F	0:00:03.990-0:00:04.256	BL	4.19799	8	15.7267		Trial 1	F5	UP	F	0:00:03.990-0:00:04.256	BL	1.83791	8	6.88529
Trial 1	F1	P	F	0:00:04.256-0:00:04.522	BL	3.15445	8	11.8174		Trial 1	F5	UP	F	0:00:04.256-0:00:04.522	BL	3.4843	8	13.0531
Trial 1	F1	P	F	0:00:04.522-0:00:04.788	BL	1.9453	8	7.28756		Trial 1	F5	UP	F	0:00:04.522-0:00:04.788	BL	3.05706	8	11.4525
Trial 1	F1	P	F	0:00:04.788-0:00:05.054	BL	0.878885	8	3.29254		Trial 1	F5	UP	F	0:00:04.788-0:00:05.054	BL	1.34389	8	5.03456
Trial 1	F1	P	F	0:00:05.054-0:00:05.320	BL	3.34926	8	12.5472		Trial 1	F5	UP	F	0:00:05.054-0:00:05.320	BL	0.325201	8	1.21828
Trial 1	F1	P	F	0:00:05.320-0:00:05.586	BL	3.66225	8	13.7197		Trial 1	F5	UP	F	0:00:05.320-0:00:05.586	BL	0.458985	8	1.71948
Trial 1	F1	P	F	0:00:05.586-0:00:05.852	BL	2.45202	8	9.18586		Trial 1	F5	UP	F	0:00:05.586-0:00:05.852	BL	0.19577	8	0.733403
Trial 1	F1	P	F	0:00:05.852-0:00:06.118	BL	3.82141	8	14.3159		Trial 1	F5	UP	F	0:00:05.852-0:00:06.118	BL	0.0830392	8	0.311084
Trial 1	F1	P	F	0:00:06.118-0:00:06.384	BL	6.56876	8	24.6084		Trial 1	F5	UP	F	0:00:06.118-0:00:06.384	BL	0.108111	8	0.405014
Trial 1	F1	P	F	0:00:06.384-0:00:06.650	BL	3.63874	8	13.6316		Trial 1	F5	UP	F	0:00:06.384-0:00:06.650	BL	0.112222	8	0.420409
Trial 1	F1	P	F	0:00:06.650-0:00:06.916	BL	1.14346	8	4.2837		Trial 1	F5	UP	F	0:00:06.650-0:00:06.916	BL	0.316607	8	1.18609
Trial 1	F1	P	F	0:00:06.916-0:00:07.182	BL	0.875293	8	3.27906		Trial 1	F5	UP	F	0:00:06.916-0:00:07.182	BL	0.902616	8	3.38143
Trial 1	F1	P	F	0:00:07.182-0:00:07.448	BL	0.252081	8	0.944358		Trial 1	F5	UP	F	0:00:07.182-0:00:07.448	BL	0.842991	8	3.15805
Trial 1	F1	P	F	0:00:07.448-0:00:07.714	BL	0.218566	8	0.818807		Trial 1	F5	UP	F	0:00:07.448-0:00:07.714	BL	1.1652	8	4.36514
Trial 1	F1	P	F	0:00:07.714-0:00:07.980	BL	0.145682	8	0.545758		Trial 1	F5	UP	F	0:00:07.714-0:00:07.980	BL	0.787517	8	2.95023
Trial 1	F1	P	F	0:00:07.980-0:00:08.246	BL	0.282668	8	1.05895		Trial 1	F5	UP	F	0:00:07.980-0:00:08.246	BL	1.10398	8	4.13579
Trial 1	F1	P	F	0:00:08.246-0:00:08.512	BL	0.353184	8	1.32311		Trial 1	F5	UP	F	0:00:08.246-0:00:08.512	BL	0.364678	8	1.36617
Trial 1	F1	P	F	0:00:08.512-0:00:08.778	BL	0.879351	8	3.29426		Trial 1	F5	UP	F	0:00:08.512-0:00:08.778	BL	0.456383	8	1.70972
Trial 1	F1	P	F	0:00:08.778-0:00:09.044	BL	0.861744	8	3.22831		Trial 1	F5	UP	F	0:00:08.778-0:00:09.044	BL	0.300051	8	1.12407
Trial 1	F1	P	F	0:00:09.044-0:00:09.310	BL	1.05821	8	3.96431		Trial 1	F5	UP	F	0:00:09.044-0:00:09.310	BL	0.215501	8	0.80732
Trial 1	F1	P	F	0:00:09.310-0:00:09.576	BL	0.158532	7	0.678741		Trial 1	F5	UP	F	0:00:09.310-0:00:09.576	BL	0.125737	7	0.538334
Trial 1	F1	P	F	0:00:09.576-0:00:09.842	BL	0.116225	8	0.435406		Trial 1	F5	UP	F	0:00:09.576-0:00:09.842	BL	0.380928	8	1.42706
Trial 1	F1	P	F	0:00:09.842-0:00:10.108	BL	0.37603	8	1.4087		Trial 1	F5	UP	F	0:00:09.842-0:00:10.108	BL	1.48864	8	5.57683
Trial 1	F1	P	F	0:00:10.108-0:00:10.374	BL	1.70001	8	6.36865		Trial 1	F5	UP	F	0:00:10.108-0:00:10.374	BL	0.631552	8	2.36595
Trial 1	F1	P	F	0:00:10.374-0:00:10.640	BL	2.95128	8	11.0562		Trial 1	F5	UP	F	0:00:10.374-0:00:10.640	BL	0.189327	8	0.709266
Trial 1	F1	P	F	0:00:10.640-0:00:10.906	BL	0.922973	8	3.45768		Trial 1	F5	UP	F	0:00:10.640-0:00:10.906	BL	0.1489	8	0.557817
Trial 1	F1	P	F	0:00:10.906-0:00:11.172	BL	1.11686	8	4.18405		Trial 1	F5	UP	F	0:00:10.906-0:00:11.172	BL	0.143562	8	0.537819
Trial 1	F1	P	F	0:00:11.172-0:00:11.438	BL	1.06285	8	3.9817		Trial 1	F5	UP	F	0:00:11.172-0:00:11.438	BL	0.260272	8	0.975042
Trial 1	F1	P	F	0:00:11.438-0:00:11.704	BL	0.4373	8	1.63823		Trial 1	F5	UP	F	0:00:11.438-0:00:11.704	BL	0.41088	8	1.53926
Trial 1	F1	P	F	0:00:11.704-0:00:11.970	BL	2.1104	8	7.90611		Trial 1	F5	UP	F	0:00:11.704-0:00:11.970	BL	0.823377	8	3.08458
Trial 1	F1	P	F	0:00:11.970-0:00:12.236	BL	1.36251	8	5.10432		Trial 1	F5	UP	F	0:00:11.970-0:00:12.236	BL	1.38424	8	5.18571
Trial 1	F1	P	F	0:00:12.236-0:00:12.502	BL	1.88459	8	7.06018		Trial 1	F5	UP	F	0:00:12.236-0:00:12.502	BL	0.638383	8	2.39155
Trial 1	F1	P	F	0:00:12.502-0:00:12.768	BL	2.47683	8	9.27881		Trial 1	F5	UP	F	0:00:12.502-0:00:12.768	BL	0.730639	8	2.73715
Trial 1	F1	P	F	0:00:12.768-0:00:13.034	BL	1.88471	8	7.06058		Trial 1	F5	UP	F	0:00:12.768-0:00:13.034	BL	1.1445	8	4.28755
Trial 1	F1	P	F	0:00:13.034-0:00:13.300	BL	2.09208	8	7.83748		Trial 1	F5	UP	F	0:00:13.034-0:00:13.300	BL	0.983025	8	3.68267
Trial 1	F1	P	F	0:00:13.300-0:00:13.566	BL	2.02612	8	7.59033		Trial 1	F5	UP	F	0:00:13.300-0:00:13.566	BL	2.01709	8	7.55652
Trial 1	F1	P	F	0:00:13.566-0:00:13.832	BL	0.711966	8	2.66721		Trial 1	F5	UP	F	0:00:13.566-0:00:13.832	BL	3.68918	8	13.8206
Trial 1	F1	P	F	0:00:13.832-0:00:14.098	BL	0.575676	8	2.15663		Trial 1	F5	UP	F	0:00:13.832-0:00:14.098	BL	2.28986	8	8.57837
Trial 1	F1	P	F	0:00:14.098-0:00:14.364	BL	1.18734	8	4.44805		Trial 1	F5	UP	F	0:00:14.098-0:00:14.364	BL	2.46784	8	9.24512
Trial 1	F1	P	F	0:00:14.364-0:00:14.630	BL	2.43894	8	9.1369		Trial 1	F5	UP	F	0:00:14.364-0:00:14.630	BL	1.82094	8	6.82172
Trial 1	F1	P	F	0:00:14.630-0:00:14.896	BL	1.33304	8	4.99387		Trial 1	F5	UP	F	0:00:14.630-0:00:14.896	BL	1.28366	8	4.80889
Trial 1	F1	P	F	0:00:14.896-0:00:15.162	BL	2.12092	8	7.9455		Trial 1	F5	UP	F	0:00:14.896-0:00:15.162	BL	3.70733	8	13.8886
Trial 1	F1	P	F	0:00:15.162-0:00:15.428	BL	3.79959	8	14.2342		Trial 1	F5	UP	F	0:00:15.162-0:00:15.428	BL	4.37502	8	16.3899
Trial 1	F1	P	F	0:00:15.428-0:00:15.694	BL	2.10637	8	7.89096		Trial 1	F5	UP	F	0:00:15.428-0:00:15.694	BL	2.0181	8	7.56027
Trial 1	F1	P	F	0:00:15.694-0:00:15.960	BL	1.66486	8	6.23699		Trial 1	F5	UP	F	0:00:15.694-0:00:15.960	BL	1.62625	8	6.09238
Trial 1	F1	P	F	0:00:15.960-0:00:16.226	BL	2.03977	8	7.64149		Trial 1	F5	UP	F	0:00:15.960-0:00:16.226	BL	1.10683	8	4.14645
Trial 1	F1	P	F	0:00:16.226-0:00:16.492	BL	0.907286	8	3.39892		Trial 1	F5	UP	F	0:00:16.226-0:00:16.492	BL	3.27501	8	12.2691
Trial 1	F1	P	F	0:00:16.492-0:00:16.758	BL	0.846725	8	3.17204		Trial 1	F5	UP	F	0:00:16.492-0:00:16.758	BL	0.976414	8	3.65788
Trial 1	F1	P	F	0:00:16.758-0:00:17.024	BL	4.29452	8	16.0883		Trial 1	F5	UP	F	0:00:16.758-0:00:17.024	BL	1.79074	8	6.70852
Trial 1	F1	P	F	0:00:17.024-0:00:17.290	BL	1.8737	8	7.01938		Trial 1	F5	UP	F	0:00:17.024-0:00:17.290	BL	2.41798	8	9.05838
Trial 1	F1	P	F	0:00:17.290-0:00:17.556	BL	2.78066	8	10.417		Trial 1	F5	UP	F	0:00:17.290-0:00:17.556	BL	1.40756	8	5.27305
Trial 1	F1	P	F	0:00:17.556-0:00:17.822	BL	2.44463	8	9.15821		Trial 1	F5	UP	F	0:00:17.556-0:00:17.822	BL	1.09211	8	4.09129
Trial 1	F1	P	F	0:00:17.822-0:00:18.088	BL	4.21046	8	15.7734		Trial 1	F5	UP	F	0:00:17.822-0:00:18.088	BL	1.49716	8	5.6087
Trial 1	F1	P	F	0:00:18.088-0:00:18.354	BL	1.90338	8	7.13054		Trial 1	F5	UP	F	0:00:18.088-0:00:18.354	BL	1.42162	8	5.32573
Trial 1	F1	P	F	0:00:18.354-0:00:18.620	BL	0.469879	8	1.76028		Trial 1	F5	UP	F	0:00:18.354-0:00:18.620	BL	1.69931	8	6.36604
Trial 1	F1	P	F	0:00:18.620-0:00:18.886	BL	0.474128	8	1.7762		Trial 1	F5	UP	F	0:00:18.620-0:00:18.886	BL	0.603374	8	2.26039
Trial 1	F1	P	F	0:00:18.886-0:00:19.152	BL	0.28529	7	1.22144		Trial 1	F5	UP	F	0:00:18.886-0:00:19.152	BL	1.19659	7	5.12308
Trial 1	F1	P	F	0:00:19.152-0:00:19.418	BL	0.526824	8	1.97362		Trial 1	F5	UP	F	0:00:19.152-0:00:19.418	BL	1.14521	8	4.29026
Trial 1	F1	P	F	0:00:19.418-0:00:19.684	BL	1.03244	8	3.86782		Trial 1	F5	UP	F	0:00:19.418-0:00:19.684	BL	1.56152	8	5.84981
Trial 1	F1	P	F	0:00:19.684-0:00:19.950	BL	0.216196	8	0.809928		Trial 1	F5	UP	F	0:00:19.684-0:00:19.950	BL	2.14076	8	8.01985
Trial 1	F1	P	F	0:00:19.950-0:00:20.216	BL	0.158168	8	0.592535		Trial 1	F5	UP	F	0:00:19.950-0:00:20.216	BL	0.371734	8	1.39261
Trial 1	F1	P	F	0:00:20.216-0:00:20.482	BL	4.19914	8	15.731		Trial 1	F5	UP	F	0:00:20.216-0:00:20.482	BL	1.35292	8	5.06836
Trial 1	F1	P	F	0:00:20.482-0:00:20.748	BL	5.62039	8	21.0554		Trial 1	F5	UP	F	0:00:20.482-0:00:20.748	BL	1.18645	8	4.44475
Trial 1	F1	P	F	0:00:20.748-0:00:21.014	BL	4.87246	8	18.2534		Trial 1	F5	UP	F	0:00:20.748-0:00:21.014	BL	0.522156	8	1.95612
Trial 1	F1	P	F	0:00:21.014-0:00:21.280	BL	3.69627	8	13.8472		Trial 1	F5	UP	F	0:00:21.014-0:00:21.280	BL	0.787123	8	2.94877
Trial 1	F1	P	F	0:00:21.280-0:00:21.546	BL	3.28633	8	12.3114		Trial 1	F5	UP	F	0:00:21.280-0:00:21.546	BL	0.895029	8	3.353
Trial 1	F1	P	F	0:00:21.546-0:00:21.812	BL	1.57763	8	5.91017		Trial 1	F5	UP	F	0:00:21.546-0:00:21.812	BL	0.649923	8	2.43477
Trial 1	F1	P	F	0:00:21.812-0:00:22.078	BL	1.30876	8	4.90293		Trial 1	F5	UP	F	0:00:21.812-0:00:22.078	BL	1.76281	8	6.60396
Trial 1	F1	P	F	0:00:22.078-0:00:22.344	BL	2.76273	8	10.3499		Trial 1	F5	UP	F	0:00:22.078-0:00:22.344	BL	1.03861	8	3.8909
Trial 1	F1	P	F	0:00:22.344-0:00:22.610	BL	1.63539	8	6.1266		Trial 1	F5	UP	F	0:00:22.344-0:00:22.610	BL	1.46844	8	5.50116
Trial 1	F1	P	F	0:00:22.610-0:00:22.876	BL	2.9979	8	11.2309		Trial 1	F5	UP	F	0:00:22.610-0:00:22.876	BL	3.18331	8	11.9254
Trial 1	F1	P	F	0:00:22.876-0:00:23.142	BL	1.07721	8	4.03549		Trial 1	F5	UP	F	0:00:22.876-0:00:23.142	BL	3.53421	8	13.24
Trial 1	F1	P	F	0:00:23.142-0:00:23.408	BL	0.476767	8	1.78608		Trial 1	F5	UP	F	0:00:23.142-0:00:23.408	BL	2.836	8	10.6244
Trial 1	F1	P	F	0:00:23.408-0:00:23.674	BL	2.98736	8	11.1914		Trial 1	F5	UP	F	0:00:23.408-0:00:23.674	BL	1.05982	8	3.97033
Trial 1	F1	P	F	0:00:23.674-0:00:23.940	BL	0.965147	8	3.61569		Trial 1	F5	UP	F	0:00:23.674-0:00:23.940	BL	0.643676	8	2.41139
Trial 1	F1	P	F	0:00:23.940-0:00:24.206	BL	0.872272	8	3.26774		Trial 1	F5	UP	F	0:00:23.940-0:00:24.206	BL	0.5367	8	2.01061
Trial 1	F1	P	F	0:00:24.206-0:00:24.472	BL	0.339923	8	1.27343		Trial 1	F5	UP	F	0:00:24.206-0:00:24.472	BL	0.428315	8	1.60457
Trial 1	F1	P	F	0:00:24.472-0:00:24.738	BL	0.981611	8	3.67737		Trial 1	F5	UP	F	0:00:24.472-0:00:24.738	BL	1.08462	8	4.06324
Trial 1	F1	P	F	0:00:24.738-0:00:25.004	BL	0.525947	8	1.97033		Trial 1	F5	UP	F	0:00:24.738-0:00:25.004	BL	0.755587	8	2.83061
Trial 1	F1	P	F	0:00:25.004-0:00:25.270	BL	0.400764	8	1.50136		Trial 1	F5	UP	F	0:00:25.004-0:00:25.270	BL	0.53882	8	2.01857
Trial 1	F1	P	F	0:00:25.270-0:00:25.536	BL	0.654938	8	2.45357		Trial 1	F5	UP	F	0:00:25.270-0:00:25.536	BL	1.99872	8	7.4877
Trial 1	F1	P	F	0:00:25.536-0:00:25.802	BL	0.546136	8	2.04596		Trial 1	F5	UP	F	0:00:25.536-0:00:25.802	BL	1.57092	8	5.88506
Trial 1	F1	P	F	0:00:25.802-0:00:26.068	BL	0.611008	8	2.28899		Trial 1	F5	UP	F	0:00:25.802-0:00:26.068	BL	0.613512	8	2.29838
Trial 1	F1	P	F	0:00:26.068-0:00:26.334	BL	0.334883	8	1.25456		Trial 1	F5	UP	F	0:00:26.068-0:00:26.334	BL	1.2932	8	4.84464
Trial 1	F1	P	F	0:00:26.334-0:00:26.600	BL	0.479022	8	1.79454		Trial 1	F5	UP	F	0:00:26.334-0:00:26.600	BL	2.3587	8	8.8363
Trial 1	F1	P	F	0:00:26.600-0:00:26.866	BL	0.461135	8	1.72752		Trial 1	F5	UP	F	0:00:26.600-0:00:26.866	BL	1.7075	8	6.39671
Trial 1	F1	P	F	0:00:26.866-0:00:27.132	BL	0.403591	8	1.51194		Trial 1	F5	UP	F	0:00:26.866-0:00:27.132	BL	0.749689	8	2.80852
Trial 1	F1	P	F	0:00:27.132-0:00:27.398	BL	0.32692	8	1.22472		Trial 1	F5	UP	F	0:00:27.132-0:00:27.398	BL	2.64942	8	9.92541
Trial 1	F1	P	F	0:00:27.398-0:00:27.664	BL	0.569119	8	2.13206		Trial 1	F5	UP	F	0:00:27.398-0:00:27.664	BL	2.68512	8	10.0591
Trial 1	F1	P	F	0:00:27.664-0:00:27.930	BL	2.01404	8	7.5451		Trial 1	F5	UP	F	0:00:27.664-0:00:27.930	BL	1.84364	8	6.90674
Trial 1	F1	P	F	0:00:27.930-0:00:28.196	BL	0.982548	8	3.68086		Trial 1	F5	UP	F	0:00:27.930-0:00:28.196	BL	1.431	8	5.36087
Trial 1	F1	P	F	0:00:28.196-0:00:28.462	BL	0.660058	8	2.47274		Trial 1	F5	UP	F	0:00:28.196-0:00:28.462	BL	0.555666	8	2.08166
Trial 1	F1	P	F	0:00:28.462-0:00:28.728	BL	0.46604	7	1.99531		Trial 1	F5	UP	F	0:00:28.462-0:00:28.728	BL	0.32173	7	1.37746
Trial 1	F1	P	F	0:00:28.728-0:00:28.994	BL	0.385827	8	1.44541		Trial 1	F5	UP	F	0:00:28.728-0:00:28.994	BL	0.776642	8	2.90949
Trial 1	F1	P	F	0:00:28.994-0:00:29.260	BL	0.302943	8	1.13489		Trial 1	F5	UP	F	0:00:28.994-0:00:29.260	BL	0.263585	8	0.987456
Trial 1	F1	P	F	0:00:29.260-0:00:29.526	BL	0.579932	8	2.17257		Trial 1	F5	UP	F	0:00:29.260-0:00:29.526	BL	0.482897	8	1.80905
Trial 1	F1	P	F	0:00:29.526-0:00:29.792	BL	0.738568	8	2.76685		Trial 1	F5	UP	F	0:00:29.526-0:00:29.792	BL	0.96225	8	3.60483
Trial 1	F1	P	F	0:00:29.792-0:00:30.058	BL	1.35898	8	5.09108		Trial 1	F5	UP	F	0:00:29.792-0:00:30.058	BL	1.36822	8	5.12568
Trial 1	F1	P	F	0:00:30.058-0:00:30.324	BL	1.92855	8	7.22485		Trial 1	F5	UP	F	0:00:30.058-0:00:30.324	BL	1.7819	8	6.67543
Trial 1	F1	P	F	0:00:30.324-0:00:30.590	BL	0.942714	8	3.53164		Trial 1	F5	UP	F	0:00:30.324-0:00:30.590	BL	0.909758	8	3.40817
Trial 1	F1	P	F	0:00:30.590-0:00:30.856	BL	1.96641	8	7.36666		Trial 1	F5	UP	F	0:00:30.590-0:00:30.856	BL	0.864041	8	3.23692
Trial 1	F1	P	F	0:00:30.856-0:00:31.122	BL	1.37569	8	5.15368		Trial 1	F5	UP	F	0:00:30.856-0:00:31.122	BL	0.277531	8	1.0397
Trial 1	F1	P	F	0:00:31.122-0:00:31.388	BL	0.671803	8	2.51673		Trial 1	F5	UP	F	0:00:31.122-0:00:31.388	BL	0.173837	8	0.651235
Trial 1	F1	P	F	0:00:31.388-0:00:31.654	BL	0.954233	8	3.57481		Trial 1	F5	UP	F	0:00:31.388-0:00:31.654	BL	0.412244	8	1.54437
Trial 1	F1	P	F	0:00:31.654-0:00:31.920	BL	2.18754	8	8.1951		Trial 1	F5	UP	F	0:00:31.654-0:00:31.920	BL	0.871526	8	3.26496
Trial 1	F1	P	F	0:00:31.920-0:00:32.186	BL	0.294574	8	1.10356		Trial 1	F5	UP	F	0:00:31.920-0:00:32.186	BL	0.75576	8	2.83128
Trial 1	F1	P	F	0:00:32.186-0:00:32.452	BL	0.24697	8	0.925208		Trial 1	F5	UP	F	0:00:32.186-0:00:32.452	BL	1.69808	8	6.36142
Trial 1	F1	P	F	0:00:32.452-0:00:32.718	BL	0.623493	8	2.33577		Trial 1	F5	UP	F	0:00:32.452-0:00:32.718	BL	1.94718	8	7.29459
Trial 1	F1	P	F	0:00:32.718-0:00:32.984	BL	0.82037	8	3.07333		Trial 1	F5	UP	F	0:00:32.718-0:00:32.984	BL	3.32334	8	12.45
Trial 1	F1	P	F	0:00:32.984-0:00:33.250	BL	0.607205	8	2.27473		Trial 1	F5	UP	F	0:00:32.984-0:00:33.250	BL	4.18815	8	15.6898
Trial 1	F1	P	F	0:00:33.250-0:00:33.516	BL	0.869176	8	3.25615		Trial 1	F5	UP	F	0:00:33.250-0:00:33.516	BL	3.19449	8	11.9674
Trial 1	F1	P	F	0:00:33.516-0:00:33.782	BL	1.58113	8	5.92329		Trial 1	F5	UP	F	0:00:33.516-0:00:33.782	BL	3.72614	8	13.959
Trial 1	F1	P	F	0:00:33.782-0:00:34.048	BL	0.56668	8	2.12293		Trial 1	F5	UP	F	0:00:33.782-0:00:34.048	BL	2.79263	8	10.4619
Trial 1	F1	P	F	0:00:34.048-0:00:34.314	BL	1.10916	8	4.1552		Trial 1	F5	UP	F	0:00:34.048-0:00:34.314	BL	0.53709	8	2.01207
Trial 1	F1	P	F	0:00:34.314-0:00:34.580	BL	1.56031	8	5.8453		Trial 1	F5	UP	F	0:00:34.314-0:00:34.580	BL	0.561981	8	2.10532
Trial 1	F1	P	F	0:00:34.580-0:00:34.846	BL	0.656627	8	2.45989		Trial 1	F5	UP	F	0:00:34.580-0:00:34.846	BL	0.543618	8	2.03652
Trial 1	F1	P	F	0:00:34.846-0:00:35.112	BL	0.200553	8	0.751318		Trial 1	F5	UP	F	0:00:34.846-0:00:35.112	BL	0.373384	8	1.39879
Trial 1	F1	P	F	0:00:35.112-0:00:35.378	BL	0.390114	8	1.46146		Trial 1	F5	UP	F	0:00:35.112-0:00:35.378	BL	0.455822	8	1.70763
Trial 1	F1	P	F	0:00:35.378-0:00:35.644	BL	1.31522	8	4.92715		Trial 1	F5	UP	F	0:00:35.378-0:00:35.644	BL	0.850742	8	3.18711
Trial 1	F1	P	F	0:00:35.644-0:00:35.910	BL	3.33404	8	12.4901		Trial 1	F5	UP	F	0:00:35.644-0:00:35.910	BL	1.11472	8	4.17603
Trial 1	F1	P	F	0:00:35.910-0:00:36.176	BL	3.15387	8	11.8152		Trial 1	F5	UP	F	0:00:35.910-0:00:36.176	BL	0.381646	8	1.42974
Trial 1	F1	P	F	0:00:36.176-0:00:36.442	BL	2.13303	8	7.99085		Trial 1	F5	UP	F	0:00:36.176-0:00:36.442	BL	0.435955	8	1.6332
Trial 1	F1	P	F	0:00:36.442-0:00:36.708	BL	2.15719	8	8.08135		Trial 1	F5	UP	F	0:00:36.442-0:00:36.708	BL	1.96314	8	7.3544
Trial 1	F1	P	F	0:00:36.708-0:00:36.974	BL	3.14003	8	11.7634		Trial 1	F5	UP	F	0:00:36.708-0:00:36.974	BL	2.74116	8	10.2691
Trial 1	F1	P	F	0:00:36.974-0:00:37.240	BL	2.94843	8	11.0456		Trial 1	F5	UP	F	0:00:36.974-0:00:37.240	BL	1.3779	8	5.16197
Trial 1	F1	P	F	0:00:37.240-0:00:37.506	BL	0.698003	8	2.6149		Trial 1	F5	UP	F	0:00:37.240-0:00:37.506	BL	0.61874	8	2.31796
Trial 1	F1	P	F	0:00:37.506-0:00:37.772	BL	0.197773	8	0.740908		Trial 1	F5	UP	F	0:00:37.506-0:00:37.772	BL	0.372632	8	1.39597
Trial 1	F1	P	F	0:00:37.772-0:00:38.038	BL	0.687451	7	2.94328		Trial 1	F5	UP	F	0:00:37.772-0:00:38.038	BL	0.264543	7	1.13262
Trial 1	F1	P	F	0:00:38.038-0:00:38.304	BL	2.07775	8	7.78379		Trial 1	F5	UP	F	0:00:38.038-0:00:38.304	BL	0.638608	8	2.39239
Trial 1	F1	P	F	0:00:38.304-0:00:38.570	BL	1.15186	8	4.31514		Trial 1	F5	UP	F	0:00:38.304-0:00:38.570	BL	0.678267	8	2.54095
Trial 1	F1	P	F	0:00:38.570-0:00:38.836	BL	2.7501	8	10.3026		Trial 1	F5	UP	F	0:00:38.570-0:00:38.836	BL	2.0563	8	7.70336
Trial 1	F1	P	F	0:00:38.836-0:00:39.102	BL	1.69594	8	6.35343		Trial 1	F5	UP	F	0:00:38.836-0:00:39.102	BL	1.3285	8	4.97691
Trial 1	F1	P	F	0:00:39.102-0:00:39.368	BL	1.15683	8	4.33375		Trial 1	F5	UP	F	0:00:39.102-0:00:39.368	BL	0.844671	8	3.16434
Trial 1	F1	P	F	0:00:39.368-0:00:39.634	BL	2.33792	8	8.75848		Trial 1	F5	UP	F	0:00:39.368-0:00:39.634	BL	0.5997	8	2.24664
Trial 1	F1	P	F	0:00:39.634-0:00:39.900	BL	0.763016	8	2.85843		Trial 1	F5	UP	F	0:00:39.634-0:00:39.900	BL	0.497851	8	1.86508
Trial 1	F1	P	F	0:00:39.900-0:00:40.166	BL	0.809323	8	3.03194		Trial 1	F5	UP	F	0:00:39.900-0:00:40.166	BL	1.6576	8	6.20979
Trial 1	F1	P	F	0:00:40.166-0:00:40.432	BL	0.247089	8	0.925661		Trial 1	F5	UP	F	0:00:40.166-0:00:40.432	BL	1.96636	8	7.36646
Trial 1	F1	P	F	0:00:40.432-0:00:40.698	BL	0.129819	8	0.486337		Trial 1	F5	UP	F	0:00:40.432-0:00:40.698	BL	1.68641	8	6.31769
Trial 1	F1	P	F	0:00:40.698-0:00:40.964	BL	0.193152	8	0.723598		Trial 1	F5	UP	F	0:00:40.698-0:00:40.964	BL	2.44593	8	9.1631
Trial 1	F1	P	F	0:00:40.964-0:00:41.230	BL	0.150525	8	0.563905		Trial 1	F5	UP	F	0:00:40.964-0:00:41.230	BL	2.85202	8	10.6844
Trial 1	F1	P	F	0:00:41.230-0:00:41.496	BL	1.08774	8	4.07495		Trial 1	F5	UP	F	0:00:41.230-0:00:41.496	BL	2.60463	8	9.75757
Trial 1	F1	P	F	0:00:41.496-0:00:41.762	BL	0.623449	8	2.3356		Trial 1	F5	UP	F	0:00:41.496-0:00:41.762	BL	1.92864	8	7.2252
Trial 1	F1	P	F	0:00:41.762-0:00:42.028	BL	0.655748	8	2.45658		Trial 1	F5	UP	F	0:00:41.762-0:00:42.028	BL	1.91251	8	7.16475
Trial 1	F1	P	F	0:00:42.028-0:00:42.294	BL	0.90903	8	3.40546		Trial 1	F5	UP	F	0:00:42.028-0:00:42.294	BL	1.54073	8	5.77199
Trial 1	F1	P	F	0:00:42.294-0:00:42.560	BL	2.36643	8	8.86526		Trial 1	F5	UP	F	0:00:42.294-0:00:42.560	BL	0.270237	8	1.01237
Trial 1	F1	P	F	0:00:42.560-0:00:42.826	BL	3.30565	8	12.3838		Trial 1	F5	UP	F	0:00:42.560-0:00:42.826	BL	0.316703	8	1.18645
Trial 1	F1	P	F	0:00:42.826-0:00:43.092	BL	2.66763	8	9.99368		Trial 1	F5	UP	F	0:00:42.826-0:00:43.092	BL	0.193224	8	0.723869
Trial 1	F1	P	F	0:00:43.092-0:00:43.358	BL	4.23517	8	15.866		Trial 1	F5	UP	F	0:00:43.092-0:00:43.358	BL	0.216892	8	0.81253
Trial 1	F1	P	F	0:00:43.358-0:00:43.624	BL	3.46631	8	12.9857		Trial 1	F5	UP	F	0:00:43.358-0:00:43.624	BL	0.0975814	8	0.365564
Trial 1	F1	P	F	0:00:43.624-0:00:43.890	BL	2.22721	8	8.34365		Trial 1	F5	UP	F	0:00:43.624-0:00:43.890	BL	0.137598	8	0.515478
Trial 1	F1	P	F	0:00:43.890-0:00:44.156	BL	0.423521	8	1.58661		Trial 1	F5	UP	F	0:00:43.890-0:00:44.156	BL	0.0840551	8	0.314891
Trial 1	F1	P	F	0:00:44.156-0:00:44.422	BL	2.15479	8	8.0724		Trial 1	F5	UP	F	0:00:44.156-0:00:44.422	BL	0.475854	8	1.78268
Trial 1	F1	P	F	0:00:44.422-0:00:44.688	BL	1.80961	8	6.77925		Trial 1	F5	UP	F	0:00:44.422-0:00:44.688	BL	0.515553	8	1.93139
Trial 1	F1	P	F	0:00:44.688-0:00:44.954	BL	1.06233	8	3.97979		Trial 1	F5	UP	F	0:00:44.688-0:00:44.954	BL	1.34823	8	5.05079
Trial 1	F1	P	F	0:00:44.954-0:00:45.220	BL	1.01127	8	3.78846		Trial 1	F5	UP	F	0:00:44.954-0:00:45.220	BL	0.685565	8	2.56829
Trial 1	F1	P	F	0:00:45.220-0:00:45.486	BL	1.16543	8	4.36599		Trial 1	F5	UP	F	0:00:45.220-0:00:45.486	BL	0.409885	8	1.53552
Trial 1	F1	P	F	0:00:45.486-0:00:45.752	BL	1.59136	8	5.96166		Trial 1	F5	UP	F	0:00:45.486-0:00:45.752	BL	1.82077	8	6.82107
Trial 1	F1	P	F	0:00:45.752-0:00:46.018	BL	1.25756	8	4.71111		Trial 1	F5	UP	F	0:00:45.752-0:00:46.018	BL	2.81182	8	10.5338
Trial 1	F1	P	F	0:00:46.018-0:00:46.284	BL	0.688009	8	2.57747		Trial 1	F5	UP	F	0:00:46.018-0:00:46.284	BL	2.21097	8	8.28285
Trial 1	F1	P	F	0:00:46.284-0:00:46.550	BL	1.82781	8	6.84743		Trial 1	F5	UP	F	0:00:46.284-0:00:46.550	BL	2.12065	8	7.94449
Trial 1	F1	P	F	0:00:46.550-0:00:46.816	BL	0.879782	8	3.29588		Trial 1	F5	UP	F	0:00:46.550-0:00:46.816	BL	1.1002	8	4.12163
Trial 1	F1	P	F	0:00:46.816-0:00:47.082	BL	0.615336	8	2.30522		Trial 1	F5	UP	F	0:00:46.816-0:00:47.082	BL	1.68257	8	6.30337
Trial 1	F1	P	F	0:00:47.082-0:00:47.348	BL	1.64658	8	6.1685		Trial 1	F5	UP	F	0:00:47.082-0:00:47.348	BL	0.937926	8	3.51369
Trial 1	F1	P	F	0:00:47.348-0:00:47.614	BL	1.96562	7	8.41565		Trial 1	F5	UP	F	0:00:47.348-0:00:47.614	BL	2.69458	7	11.5367
Trial 1	F1	P	F	0:00:47.614-0:00:47.880	BL	3.66059	8	13.7135		Trial 1	F5	UP	F	0:00:47.614-0:00:47.880	BL	3.0157	8	11.2976
Trial 1	F1	P	F	0:00:47.880-0:00:48.146	BL	5.64567	8	21.1501		Trial 1	F5	UP	F	0:00:47.880-0:00:48.146	BL	0.955831	8	3.5808
Trial 1	F1	P	F	0:00:48.146-0:00:48.412	BL	4.7169	8	17.6707		Trial 1	F5	UP	F	0:00:48.146-0:00:48.412	BL	0.681942	8	2.55472
Trial 1	F1	P	F	0:00:48.412-0:00:48.678	BL	1.6784	8	6.28773		Trial 1	F5	UP	F	0:00:48.412-0:00:48.678	BL	0.948698	8	3.55407
Trial 1	F1	P	F	0:00:48.678-0:00:48.944	BL	1.05095	8	3.9371		Trial 1	F5	UP	F	0:00:48.678-0:00:48.944	BL	0.786666	8	2.94704
Trial 1	F1	P	F	0:00:48.944-0:00:49.210	BL	0.686046	8	2.57011		Trial 1	F5	UP	F	0:00:48.944-0:00:49.210	BL	0.847142	8	3.17361
Trial 1	F1	P	F	0:00:49.210-0:00:49.476	BL	0.808249	8	3.0279		Trial 1	F5	UP	F	0:00:49.210-0:00:49.476	BL	1.62653	8	6.09339
Trial 1	F1	P	F	0:00:49.476-0:00:49.742	BL	1.53242	8	5.74078		Trial 1	F5	UP	F	0:00:49.476-0:00:49.742	BL	0.890012	8	3.33419
Trial 1	F1	P	F	0:00:49.742-0:00:50.008	BL	3.73595	8	13.9958		Trial 1	F5	UP	F	0:00:49.742-0:00:50.008	BL	1.85611	8	6.95346
Trial 1	F1	P	F	0:00:50.008-0:00:50.274	BL	3.97327	8	14.8848		Trial 1	F5	UP	F	0:00:50.008-0:00:50.274	BL	0.807197	8	3.02396
Trial 1	F1	P	F	0:00:50.274-0:00:50.540	BL	1.92668	8	7.21786		Trial 1	F5	UP	F	0:00:50.274-0:00:50.540	BL	0.456842	8	1.71145
Trial 1	F1	P	F	0:00:50.540-0:00:50.806	BL	2.76219	8	10.3478		Trial 1	F5	UP	F	0:00:50.540-0:00:50.806	BL	1.70259	8	6.37834
Trial 1	F1	P	F	0:00:50.806-0:00:51.072	BL	5.89611	8	22.0883		Trial 1	F5	UP	F	0:00:50.806-0:00:51.072	BL	1.97854	8	7.41209
Trial 1	F1	P	F	0:00:51.072-0:00:51.338	BL	1.53688	8	5.75754		Trial 1	F5	UP	F	0:00:51.072-0:00:51.338	BL	1.57121	8	5.88613
Trial 1	F1	P	F	0:00:51.338-0:00:51.604	BL	1.51342	8	5.6696		Trial 1	F5	UP	F	0:00:51.338-0:00:51.604	BL	1.12411	8	4.21118
Trial 1	F1	P	F	0:00:51.604-0:00:51.870	BL	1.00755	8	3.77453		Trial 1	F5	UP	F	0:00:51.604-0:00:51.870	BL	1.13876	8	4.2661
Trial 1	F1	P	F	0:00:51.870-0:00:52.136	BL	0.206038	8	0.77187		Trial 1	F5	UP	F	0:00:51.870-0:00:52.136	BL	0.627426	8	2.35049
Trial 1	F1	P	F	0:00:52.136-0:00:52.402	BL	3.24084	8	12.141		Trial 1	F5	UP	F	0:00:52.136-0:00:52.402	BL	1.18428	8	4.43658
Trial 1	F1	P	F	0:00:52.402-0:00:52.668	BL	0.731142	8	2.73905		Trial 1	F5	UP	F	0:00:52.402-0:00:52.668	BL	1.22706	8	4.59689
Trial 1	F1	P	F	0:00:52.668-0:00:52.934	BL	3.20086	8	11.9912		Trial 1	F5	UP	F	0:00:52.668-0:00:52.934	BL	1.59778	8	5.98567
Trial 1	F1	P	F	0:00:52.934-0:00:53.200	BL	1.33252	8	4.99197		Trial 1	F5	UP	F	0:00:52.934-0:00:53.200	BL	1.64701	8	6.17014
Trial 1	F1	P	F	0:00:53.200-0:00:53.466	BL	5.02274	8	18.8163		Trial 1	F5	UP	F	0:00:53.200-0:00:53.466	BL	1.12412	8	4.21121
Trial 1	F1	P	F	0:00:53.466-0:00:53.732	BL	3.46301	8	12.9732		Trial 1	F5	UP	F	0:00:53.466-0:00:53.732	BL	0.739976	8	2.77213
Trial 1	F1	P	F	0:00:53.732-0:00:53.998	BL	1.06689	8	3.99688		Trial 1	F5	UP	F	0:00:53.732-0:00:53.998	BL	0.180207	8	0.675106
Trial 1	F1	P	F	0:00:53.998-0:00:54.264	BL	0.593329	8	2.22276		Trial 1	F5	UP	F	0:00:53.998-0:00:54.264	BL	0.226331	8	0.847889
Trial 1	F1	P	F	0:00:54.264-0:00:54.530	BL	1.23857	8	4.64003		Trial 1	F5	UP	F	0:00:54.264-0:00:54.530	BL	0.476722	8	1.78593
Trial 1	F1	P	F	0:00:54.530-0:00:54.796	BL	2.90896	8	10.8977		Trial 1	F5	UP	F	0:00:54.530-0:00:54.796	BL	0.63557	8	2.381
Trial 1	F1	P	F	0:00:54.796-0:00:55.062	BL	1.88198	8	7.05036		Trial 1	F5	UP	F	0:00:54.796-0:00:55.062	BL	0.66458	8	2.48968
Trial 1	F1	P	F	0:00:55.062-0:00:55.328	BL	2.64514	8	9.90937		Trial 1	F5	UP	F	0:00:55.062-0:00:55.328	BL	1.51433	8	5.67305
Trial 1	F1	P	F	0:00:55.328-0:00:55.594	BL	2.87826	8	10.7827		Trial 1	F5	UP	F	0:00:55.328-0:00:55.594	BL	0.728551	8	2.72932
Trial 1	F1	P	F	0:00:55.594-0:00:55.860	BL	4.0177	8	15.0514		Trial 1	F5	UP	F	0:00:55.594-0:00:55.860	BL	1.0792	8	4.04299
Trial 1	F1	P	F	0:00:55.860-0:00:56.126	BL	3.62236	8	13.5703		Trial 1	F5	UP	F	0:00:55.860-0:00:56.126	BL	1.77536	8	6.65092
Trial 1	F1	P	F	0:00:56.126-0:00:56.392	BL	0.431497	8	1.61649		Trial 1	F5	UP	F	0:00:56.126-0:00:56.392	BL	1.18937	8	4.45567
Trial 1	F1	P	F	0:00:56.392-0:00:56.658	BL	0.671527	8	2.51571		Trial 1	F5	UP	F	0:00:56.392-0:00:56.658	BL	3.00048	8	11.2406
Trial 1	F1	P	F	0:00:56.658-0:00:56.924	BL	2.48078	8	9.29361		Trial 1	F5	UP	F	0:00:56.658-0:00:56.924	BL	3.61625	8	13.5473
Trial 1	F1	P	F	0:00:56.924-0:00:57.190	BL	1.498	7	6.4136		Trial 1	F5	UP	F	0:00:56.924-0:00:57.190	BL	2.77401	7	11.8767
Trial 1	F1	P	F	0:00:57.190-0:00:57.456	BL	0.448012	8	1.67836		Trial 1	F5	UP	F	0:00:57.190-0:00:57.456	BL	2.46353	8	9.22903
Trial 1	F1	P	F	0:00:57.456-0:00:57.722	BL	0.370607	8	1.38838		Trial 1	F5	UP	F	0:00:57.456-0:00:57.722	BL	3.48138	8	13.0421
Trial 1	F1	P	F	0:00:57.722-0:00:57.988	BL	0.650379	8	2.43649		Trial 1	F5	UP	F	0:00:57.722-0:00:57.988	BL	2.48113	8	9.29497
Trial 1	F1	P	F	0:00:57.988-0:00:58.254	BL	0.757631	8	2.83827		Trial 1	F5	UP	F	0:00:57.988-0:00:58.254	BL	4.35568	8	16.3174
Trial 1	F1	P	F	0:00:58.254-0:00:58.520	BL	1.12526	8	4.21552		Trial 1	F5	UP	F	0:00:58.254-0:00:58.520	BL	0.903786	8	3.3858
Trial 1	F1	P	F	0:00:58.520-0:00:58.786	BL	0.491562	8	1.84152		Trial 1	F5	UP	F	0:00:58.520-0:00:58.786	BL	0.741339	8	2.77725
Trial 1	F1	P	F	0:00:58.786-0:00:59.052	BL	0.302364	8	1.13274		Trial 1	F5	UP	F	0:00:58.786-0:00:59.052	BL	1.74942	8	6.55374
Trial 1	F1	P	F	0:00:59.052-0:00:59.318	BL	0.307802	8	1.15311		Trial 1	F5	UP	F	0:00:59.052-0:00:59.318	BL	1.60991	8	6.03115
Trial 1	F1	P	F	0:00:59.318-0:00:59.584	BL	3.18565	8	11.9342		Trial 1	F5	UP	F	0:00:59.318-0:00:59.584	BL	5.32424	8	19.9459
Trial 1	F1	P	F	0:00:59.584-0:00:59.850	BL	1.99512	8	7.47423		Trial 1	F5	UP	F	0:00:59.584-0:00:59.850	BL	1.24722	8	4.6724
Trial 1	F1	P	F	0:00:59.850-0:01:00.116	BL	0.525993	8	1.9705		Trial 1	F5	UP	F	0:00:59.850-0:01:00.116	BL	1.65626	8	6.20477
Trial 1	F1	P	F	0:01:00.116-0:01:00.382	BL	0.356319	8	1.33486		Trial 1	F5	UP	F	0:01:00.116-0:01:00.382	BL	1.69066	8	6.33361
Trial 1	F1	P	F	0:01:00.382-0:01:00.648	BL	0.223397	8	0.836904		Trial 1	F5	UP	F	0:01:00.382-0:01:00.648	BL	0.478047	8	1.79088
Trial 1	F1	P	F	0:01:00.648-0:01:00.914	BL	0.244235	8	0.914962		Trial 1	F5	UP	F	0:01:00.648-0:01:00.914	BL	0.372859	8	1.39682
Trial 1	F1	P	F	0:01:00.914-0:01:01.180	BL	0.255547	8	0.957336		Trial 1	F5	UP	F	0:01:00.914-0:01:01.180	BL	3.11987	8	11.6879
Trial 1	F1	P	F	0:01:01.180-0:01:01.446	BL	1.15457	8	4.3253		Trial 1	F5	UP	F	0:01:01.180-0:01:01.446	BL	2.27846	8	8.53575
Trial 1	F1	P	F	0:01:01.446-0:01:01.712	BL	3.26298	8	12.2239		Trial 1	F5	UP	F	0:01:01.446-0:01:01.712	BL	0.968985	8	3.63004
Trial 1	F1	P	F	0:01:01.712-0:01:01.978	BL	2.1373	8	8.00688		Trial 1	F5	UP	F	0:01:01.712-0:01:01.978	BL	0.594226	8	2.22614
Trial 1	F1	P	F	0:01:01.978-0:01:02.244	BL	3.55313	8	13.3109		Trial 1	F5	UP	F	0:01:01.978-0:01:02.244	BL	5.71112	8	21.3953
Trial 1	F1	P	F	0:01:02.244-0:01:02.510	BL	4.26428	8	15.975		Trial 1	F5	UP	F	0:01:02.244-0:01:02.510	BL	3.5468	8	13.2871
Trial 1	F1	P	F	0:01:02.510-0:01:02.776	BL	2.23917	8	8.38853		Trial 1	F5	UP	F	0:01:02.510-0:01:02.776	BL	0.912091	8	3.41694
Trial 1	F1	P	F	0:01:02.776-0:01:03.042	BL	2.66758	8	9.99339		Trial 1	F5	UP	F	0:01:02.776-0:01:03.042	BL	4.12006	8	15.4347
Trial 1	F1	P	F	0:01:03.042-0:01:03.308	BL	1.136	8	4.25574		Trial 1	F5	UP	F	0:01:03.042-0:01:03.308	BL	11.3052	8	42.3521
Trial 1	F1	P	F	0:01:03.308-0:01:03.574	BL	0.27794	8	1.04123		Trial 1	F5	UP	F	0:01:03.308-0:01:03.574	BL	8.28891	8	31.0523
Trial 1	F1	P	F	0:01:03.574-0:01:03.840	BL	0.462402	8	1.73227		Trial 1	F5	UP	F	0:01:03.574-0:01:03.840	BL	2.58056	8	9.6674
Trial 1	F1	P	F	0:01:03.840-0:01:04.106	BL	1.75236	8	6.56478		Trial 1	F5	UP	F	0:01:03.840-0:01:04.106	BL	2.51966	8	9.43931
Trial 1	F1	P	F	0:01:04.106-0:01:04.372	BL	1.61046	8	6.03318		Trial 1	F5	UP	F	0:01:04.106-0:01:04.372	BL	4.23678	8	15.872
Trial 1	F1	P	F	0:01:04.372-0:01:04.638	BL	0.455753	8	1.70737		Trial 1	F5	UP	F	0:01:04.372-0:01:04.638	BL	4.7894	8	17.9424
Trial 1	F1	P	F	0:01:04.638-0:01:04.904	BL	2.49313	8	9.33991		Trial 1	F5	UP	F	0:01:04.638-0:01:04.904	BL	4.6086	8	17.265
Trial 1	F1	P	F	0:01:04.904-0:01:05.170	BL	2.10452	8	7.88406		Trial 1	F5	UP	F	0:01:04.904-0:01:05.170	BL	2.3994	8	8.98873
Trial 1	F1	P	F	0:01:05.170-0:01:05.436	BL	1.3853	8	5.18966		Trial 1	F5	UP	F	0:01:05.170-0:01:05.436	BL	2.19186	8	8.21126
Trial 1	F1	P	F	0:01:05.436-0:01:05.702	BL	1.07296	8	4.01957		Trial 1	F5	UP	F	0:01:05.436-0:01:05.702	BL	1.29226	8	4.84112
Trial 1	F1	P	F	0:01:05.702-0:01:05.968	BL	0.704563	8	2.63947		Trial 1	F5	UP	F	0:01:05.702-0:01:05.968	BL	0.904967	8	3.39023
Trial 1	F1	P	F	0:01:05.968-0:01:06.234	BL	0.370846	8	1.38928		Trial 1	F5	UP	F	0:01:05.968-0:01:06.234	BL	0.851369	8	3.18943
Trial 1	F1	P	F	0:01:06.234-0:01:06.500	BL	0.734609	8	2.75202		Trial 1	F5	UP	F	0:01:06.234-0:01:06.500	BL	0.984507	8	3.68819
Trial 1	F1	P	F	0:01:06.500-0:01:06.766	BL	0.863695	7	3.69784		Trial 1	F5	UP	F	0:01:06.500-0:01:06.766	BL	0.106183	7	0.454616
Trial 1	F1	P	F	0:01:06.766-0:01:07.032	BL	1.10518	8	4.14027		Trial 1	F5	UP	F	0:01:06.766-0:01:07.032	BL	0.416547	8	1.56048
Trial 1	F1	P	F	0:01:07.032-0:01:07.298	BL	1.40547	8	5.26523		Trial 1	F5	UP	F	0:01:07.032-0:01:07.298	BL	0.203197	8	0.761227
Trial 1	F1	P	F	0:01:07.298-0:01:07.564	BL	1.05281	8	3.94411		Trial 1	F5	UP	F	0:01:07.298-0:01:07.564	BL	0.27565	8	1.03266
Trial 1	F1	P	F	0:01:07.564-0:01:07.830	BL	2.12915	8	7.97634		Trial 1	F5	UP	F	0:01:07.564-0:01:07.830	BL	0.434148	8	1.62642
Trial 1	F1	P	F	0:01:07.830-0:01:08.096	BL	2.15902	8	8.08822		Trial 1	F5	UP	F	0:01:07.830-0:01:08.096	BL	1.14441	8	4.28726
Trial 1	F1	P	F	0:01:08.096-0:01:08.362	BL	1.8705	8	7.00739		Trial 1	F5	UP	F	0:01:08.096-0:01:08.362	BL	0.794491	8	2.97637
Trial 1	F1	P	F	0:01:08.362-0:01:08.628	BL	2.66516	8	9.98431		Trial 1	F5	UP	F	0:01:08.362-0:01:08.628	BL	0.418196	8	1.56666
Trial 1	F1	P	F	0:01:08.628-0:01:08.894	BL	1.53522	8	5.75134		Trial 1	F5	UP	F	0:01:08.628-0:01:08.894	BL	0.645405	8	2.41786
Trial 1	F1	P	F	0:01:08.894-0:01:09.160	BL	2.2071	8	8.26835		Trial 1	F5	UP	F	0:01:08.894-0:01:09.160	BL	0.749922	8	2.80939
Trial 1	F1	P	F	0:01:09.160-0:01:09.426	BL	2.97585	8	11.1483		Trial 1	F5	UP	F	0:01:09.160-0:01:09.426	BL	0.676527	8	2.53444
Trial 1	F1	P	F	0:01:09.426-0:01:09.692	BL	2.23468	8	8.37167		Trial 1	F5	UP	F	0:01:09.426-0:01:09.692	BL	0.495645	8	1.85681
Trial 1	F1	P	F	0:01:09.692-0:01:09.958	BL	4.15978	8	15.5836		Trial 1	F5	UP	F	0:01:09.692-0:01:09.958	BL	0.302307	8	1.13252
Trial 1	F1	P	F	0:01:09.958-0:01:10.224	BL	1.20694	8	4.52154		Trial 1	F5	UP	F	0:01:09.958-0:01:10.224	BL	0.44125	8	1.65304
Trial 1	F1	P	F	0:01:10.224-0:01:10.490	BL	2.09565	8	7.8508		Trial 1	F5	UP	F	0:01:10.224-0:01:10.490	BL	1.67744	8	6.28409
Trial 1	F1	P	F	0:01:10.490-0:01:10.756	BL	1.04183	8	3.90296		Trial 1	F5	UP	F	0:01:10.490-0:01:10.756	BL	1.34754	8	5.04825
Trial 1	F1	P	F	0:01:10.756-0:01:11.022	BL	1.47804	8	5.53712		Trial 1	F5	UP	F	0:01:10.756-0:01:11.022	BL	0.925241	8	3.4662
Trial 1	F1	P	F	0:01:11.022-0:01:11.288	BL	1.13833	8	4.26445		Trial 1	F5	UP	F	0:01:11.022-0:01:11.288	BL	1.43125	8	5.36184
Trial 1	F1	P	F	0:01:11.288-0:01:11.554	BL	1.66422	8	6.23462		Trial 1	F5	UP	F	0:01:11.288-0:01:11.554	BL	0.564319	8	2.11408
Trial 1	F1	P	F	0:01:11.554-0:01:11.820	BL	1.00179	8	3.75296		Trial 1	F5	UP	F	0:01:11.554-0:01:11.820	BL	1.66568	8	6.24004
Trial 1	F1	P	F	0:01:11.820-0:01:12.086	BL	0.470279	8	1.76178		Trial 1	F5	UP	F	0:01:11.820-0:01:12.086	BL	1.82422	8	6.83396
Trial 1	F1	P	F	0:01:12.086-0:01:12.352	BL	0.667259	8	2.49973		Trial 1	F5	UP	F	0:01:12.086-0:01:12.352	BL	0.540941	8	2.02651
Trial 1	F1	P	F	0:01:12.352-0:01:12.618	BL	1.33529	8	5.00235		Trial 1	F5	UP	F	0:01:12.352-0:01:12.618	BL	1.92109	8	7.19685
Trial 1	F1	P	F	0:01:12.618-0:01:12.884	BL	0.635435	8	2.3805		Trial 1	F5	UP	F	0:01:12.618-0:01:12.884	BL	1.78064	8	6.67071
Trial 1	F1	P	F	0:01:12.884-0:01:13.150	BL	0.602821	8	2.25832		Trial 1	F5	UP	F	0:01:12.884-0:01:13.150	BL	1.56631	8	5.86778
Trial 1	F1	P	F	0:01:13.150-0:01:13.416	BL	1.64219	8	6.15204		Trial 1	F5	UP	F	0:01:13.150-0:01:13.416	BL	1.15008	8	4.30849
Trial 1	F1	P	F	0:01:13.416-0:01:13.682	BL	1.55085	8	5.80987		Trial 1	F5	UP	F	0:01:13.416-0:01:13.682	BL	0.908592	8	3.4038
Trial 1	F1	P	F	0:01:13.682-0:01:13.948	BL	0.284443	8	1.06559		Trial 1	F5	UP	F	0:01:13.682-0:01:13.948	BL	1.97585	8	7.40204
Trial 1	F1	P	F	0:01:13.948-0:01:14.214	BL	0.818538	8	3.06648		Trial 1	F5	UP	F	0:01:13.948-0:01:14.214	BL	1.02845	8	3.85289
Trial 1	F1	P	F	0:01:14.214-0:01:14.480	BL	0.413734	8	1.54995		Trial 1	F5	UP	F	0:01:14.214-0:01:14.480	BL	1.11237	8	4.16722
Trial 1	F1	P	F	0:01:14.480-0:01:14.746	BL	1.00043	8	3.74783		Trial 1	F5	UP	F	0:01:14.480-0:01:14.746	BL	1.30981	8	4.90688
Trial 1	F1	P	F	0:01:14.746-0:01:15.012	BL	2.03283	8	7.61552		Trial 1	F5	UP	F	0:01:14.746-0:01:15.012	BL	0.686632	8	2.57231
Trial 1	F1	P	F	0:01:15.012-0:01:15.278	BL	3.68802	8	13.8162		Trial 1	F5	UP	F	0:01:15.012-0:01:15.278	BL	4.06788	8	15.2394
Trial 1	F1	P	F	0:01:15.278-0:01:15.544	BL	2.68355	8	10.0533		Trial 1	F5	UP	F	0:01:15.278-0:01:15.544	BL	1.95242	8	7.31429
Trial 1	F1	P	F	0:01:15.544-0:01:15.810	BL	1.01526	8	3.8034		Trial 1	F5	UP	F	0:01:15.544-0:01:15.810	BL	2.1342	8	7.99525
Trial 1	F1	P	F	0:01:15.810-0:01:16.076	BL	2.4979	7	10.6946		Trial 1	F5	UP	F	0:01:15.810-0:01:16.076	BL	1.90894	7	8.17297
Trial 1	F1	P	F	0:01:16.076-0:01:16.342	BL	1.86113	8	6.97225		Trial 1	F5	UP	F	0:01:16.076-0:01:16.342	BL	2.04945	8	7.67776
Trial 1	F1	P	F	0:01:16.342-0:01:16.608	BL	0.665079	8	2.49154		Trial 1	F5	UP	F	0:01:16.342-0:01:16.608	BL	2.0791	8	7.78879
Trial 1	F1	P	F	0:01:16.608-0:01:16.874	BL	0.962228	8	3.60474		Trial 1	F5	UP	F	0:01:16.608-0:01:16.874	BL	1.31698	8	4.93375
Trial 1	F1	P	F	0:01:16.874-0:01:17.140	BL	0.529108	8	1.98217		Trial 1	F5	UP	F	0:01:16.874-0:01:17.140	BL	0.697517	8	2.61308
Trial 1	F1	P	F	0:01:17.140-0:01:17.406	BL	2.98724	8	11.191		Trial 1	F5	UP	F	0:01:17.140-0:01:17.406	BL	0.313476	8	1.17436
Trial 1	F1	P	F	0:01:17.406-0:01:17.672	BL	4.10585	8	15.3815		Trial 1	F5	UP	F	0:01:17.406-0:01:17.672	BL	0.726296	8	2.72088
Trial 1	F1	P	F	0:01:17.672-0:01:17.938	BL	1.0747	8	4.02607		Trial 1	F5	UP	F	0:01:17.672-0:01:17.938	BL	0.698225	8	2.61571
Trial 1	F1	P	F	0:01:17.938-0:01:18.204	BL	1.36854	8	5.12691		Trial 1	F5	UP	F	0:01:17.938-0:01:18.204	BL	0.549099	8	2.05706
Trial 1	F1	P	F	0:01:18.204-0:01:18.470	BL	0.464291	8	1.73935		Trial 1	F5	UP	F	0:01:18.204-0:01:18.470	BL	0.663939	8	2.48728
Trial 1	F1	P	F	0:01:18.470-0:01:18.736	BL	0.319746	8	1.19785		Trial 1	F5	UP	F	0:01:18.470-0:01:18.736	BL	1.67718	8	6.28313
Trial 1	F1	P	F	0:01:18.736-0:01:19.002	BL	0.278472	8	1.04322		Trial 1	F5	UP	F	0:01:18.736-0:01:19.002	BL	2.37064	8	8.88104
Trial 1	F1	P	F	0:01:19.002-0:01:19.268	BL	0.220573	8	0.826317		Trial 1	F5	UP	F	0:01:19.002-0:01:19.268	BL	1.29416	8	4.84825
Trial 1	F1	P	F	0:01:19.268-0:01:19.534	BL	0.122305	8	0.458182		Trial 1	F5	UP	F	0:01:19.268-0:01:19.534	BL	0.310919	8	1.16478
Trial 1	F1	P	F	0:01:19.534-0:01:19.800	BL	0.631903	8	2.36727		Trial 1	F5	UP	F	0:01:19.534-0:01:19.800	BL	0.292882	8	1.09721
Trial 1	F1	P	F	0:01:19.800-0:01:20.066	BL	0.719932	8	2.69704		Trial 1	F5	UP	F	0:01:19.800-0:01:20.066	BL	1.32212	8	4.95298
Trial 1	F1	P	F	0:01:20.066-0:01:20.332	BL	0.664845	8	2.4907		Trial 1	F5	UP	F	0:01:20.066-0:01:20.332	BL	0.992396	8	3.71779
Trial 1	F1	P	F	0:01:20.332-0:01:20.598	BL	0.804181	8	3.01266		Trial 1	F5	UP	F	0:01:20.332-0:01:20.598	BL	2.30684	8	8.64201
Trial 1	F1	P	F	0:01:20.598-0:01:20.864	BL	0.352235	8	1.31956		Trial 1	F5	UP	F	0:01:20.598-0:01:20.864	BL	2.19268	8	8.21429
Trial 1	F1	P	F	0:01:20.864-0:01:21.130	BL	0.291731	8	1.0929		Trial 1	F5	UP	F	0:01:20.864-0:01:21.130	BL	2.61342	8	9.79053
Trial 1	F1	P	F	0:01:21.130-0:01:21.396	BL	0.185899	8	0.696422		Trial 1	F5	UP	F	0:01:21.130-0:01:21.396	BL	0.661808	8	2.47928
Trial 1	F1	P	F	0:01:21.396-0:01:21.662	BL	0.383028	8	1.43492		Trial 1	F5	UP	F	0:01:21.396-0:01:21.662	BL	1.06887	8	4.00428
Trial 1	F1	P	F	0:01:21.662-0:01:21.928	BL	0.885171	8	3.31606		Trial 1	F5	UP	F	0:01:21.662-0:01:21.928	BL	0.921543	8	3.45233
Trial 1	F1	P	F	0:01:21.928-0:01:22.194	BL	0.640808	8	2.40063		Trial 1	F5	UP	F	0:01:21.928-0:01:22.194	BL	1.59832	8	5.98769
Trial 1	F1	P	F	0:01:22.194-0:01:22.460	BL	0.459027	8	1.71963		Trial 1	F5	UP	F	0:01:22.194-0:01:22.460	BL	2.50496	8	9.38423
Trial 1	F1	P	F	0:01:22.460-0:01:22.726	BL	0.250979	8	0.940227		Trial 1	F5	UP	F	0:01:22.460-0:01:22.726	BL	2.98128	8	11.1686
Trial 1	F1	P	F	0:01:22.726-0:01:22.992	BL	0.731942	8	2.74204		Trial 1	F5	UP	F	0:01:22.726-0:01:22.992	BL	3.42328	8	12.8245
Trial 1	F1	P	F	0:01:22.992-0:01:23.258	BL	0.775777	8	2.90624		Trial 1	F5	UP	F	0:01:22.992-0:01:23.258	BL	3.70283	8	13.8717
Trial 1	F1	P	F	0:01:23.258-0:01:23.524	BL	1.89094	8	7.08394		Trial 1	F5	UP	F	0:01:23.258-0:01:23.524	BL	1.02	8	3.82117
Trial 1	F1	P	F	0:01:23.524-0:01:23.790	BL	4.65921	8	17.4546		Trial 1	F5	UP	F	0:01:23.524-0:01:23.790	BL	1.07932	8	4.04339
Trial 1	F1	P	F	0:01:23.790-0:01:24.056	BL	5.84068	8	21.8806		Trial 1	F5	UP	F	0:01:23.790-0:01:24.056	BL	0.989396	8	3.70652
Trial 1	F1	P	F	0:01:24.056-0:01:24.322	BL	4.58991	8	17.195		Trial 1	F5	UP	F	0:01:24.056-0:01:24.322	BL	0.369787	8	1.38531
Trial 1	F1	P	F	0:01:24.322-0:01:24.588	BL	3.63299	8	13.6101		Trial 1	F5	UP	F	0:01:24.322-0:01:24.588	BL	0.328827	8	1.23187
Trial 1	F1	P	F	0:01:24.588-0:01:24.854	BL	2.50135	8	9.37069		Trial 1	F5	UP	F	0:01:24.588-0:01:24.854	BL	0.24287	8	0.909849
Trial 1	F1	P	F	0:01:24.854-0:01:25.120	BL	0.571471	8	2.14087		Trial 1	F5	UP	F	0:01:24.854-0:01:25.120	BL	0.178501	8	0.668712
Trial 1	F1	P	F	0:01:25.120-0:01:25.386	BL	0.197722	8	0.740713		Trial 1	F5	UP	F	0:01:25.120-0:01:25.386	BL	0.731393	8	2.73998
Trial 1	F1	P	F	0:01:25.386-0:01:25.652	BL	0.885496	7	3.79118		Trial 1	F5	UP	F	0:01:25.386-0:01:25.652	BL	0.331927	7	1.42112
Trial 1	F1	P	F	0:01:25.652-0:01:25.918	BL	1.86211	8	6.97595		Trial 1	F5	UP	F	0:01:25.652-0:01:25.918	BL	1.09103	8	4.0873
Trial 1	F1	P	F	0:01:25.918-0:01:26.184	BL	0.670315	8	2.51116		Trial 1	F5	UP	F	0:01:25.918-0:01:26.184	BL	2.67488	8	10.0208
Trial 1	F1	P	F	0:01:26.184-0:01:26.450	BL	0.322751	8	1.2091		Trial 1	F5	UP	F	0:01:26.184-0:01:26.450	BL	2.94553	8	11.0347
Trial 1	F1	P	F	0:01:26.450-0:01:26.716	BL	0.196729	8	0.736995		Trial 1	F5	UP	F	0:01:26.450-0:01:26.716	BL	0.407435	8	1.52636
Trial 1	F1	P	F	0:01:26.716-0:01:26.982	BL	0.184398	8	0.6908		Trial 1	F5	UP	F	0:01:26.716-0:01:26.982	BL	0.578171	8	2.16597
Trial 1	F1	P	F	0:01:26.982-0:01:27.248	BL	0.748906	8	2.80559		Trial 1	F5	UP	F	0:01:26.982-0:01:27.248	BL	1.28739	8	4.8229
Trial 1	F1	P	F	0:01:27.248-0:01:27.514	BL	1.36497	8	5.1135		Trial 1	F5	UP	F	0:01:27.248-0:01:27.514	BL	1.25992	8	4.71996
Trial 1	F1	P	F	0:01:27.514-0:01:27.780	BL	0.628249	8	2.35357		Trial 1	F5	UP	F	0:01:27.514-0:01:27.780	BL	1.2563	8	4.70641
Trial 1	F1	P	F	0:01:27.780-0:01:28.046	BL	2.39893	8	8.98705		Trial 1	F5	UP	F	0:01:27.780-0:01:28.046	BL	2.7496	8	10.3007
Trial 1	F1	P	F	0:01:28.046-0:01:28.312	BL	1.86175	8	6.97458		Trial 1	F5	UP	F	0:01:28.046-0:01:28.312	BL	0.965602	8	3.61737
Trial 1	F1	P	F	0:01:28.312-0:01:28.578	BL	2.28769	8	8.57027		Trial 1	F5	UP	F	0:01:28.312-0:01:28.578	BL	1.23013	8	4.60838
Trial 1	F1	P	F	0:01:28.578-0:01:28.844	BL	3.17084	8	11.8787		Trial 1	F5	UP	F	0:01:28.578-0:01:28.844	BL	0.4103	8	1.53709
Trial 1	F1	P	F	0:01:28.844-0:01:29.110	BL	1.60197	8	6.00136		Trial 1	F5	UP	F	0:01:28.844-0:01:29.110	BL	1.05433	8	3.94977
Trial 1	F1	P	F	0:01:29.110-0:01:29.376	BL	3.40067	8	12.7398		Trial 1	F5	UP	F	0:01:29.110-0:01:29.376	BL	0.602158	8	2.25583
Trial 1	F1	P	F	0:01:29.376-0:01:29.642	BL	0.329921	8	1.23596		Trial 1	F5	UP	F	0:01:29.376-0:01:29.642	BL	1.56682	8	5.86967
Trial 1	F1	P	F	0:01:29.642-0:01:29.908	BL	1.00249	8	3.75556		Trial 1	F5	UP	F	0:01:29.642-0:01:29.908	BL	1.91603	8	7.17792
Trial 1	F1	P	F	0:01:29.908-0:01:30.174	BL	0.522786	8	1.95848		Trial 1	F5	UP	F	0:01:29.908-0:01:30.174	BL	0.995709	8	3.73018
Trial 1	F1	P	F	0:01:30.174-0:01:30.440	BL	0.952128	8	3.56691		Trial 1	F5	UP	F	0:01:30.174-0:01:30.440	BL	5.01276	8	18.7792
Trial 1	F1	P	F	0:01:30.440-0:01:30.706	BL	1.05857	8	3.96567		Trial 1	F5	UP	F	0:01:30.440-0:01:30.706	BL	2.05553	8	7.70054
Trial 1	F1	P	F	0:01:30.706-0:01:30.972	BL	0.824378	8	3.08831		Trial 1	F5	UP	F	0:01:30.706-0:01:30.972	BL	0.18544	8	0.694701
Trial 1	F1	P	F	0:01:30.972-0:01:31.238	BL	2.25222	8	8.4374		Trial 1	F5	UP	F	0:01:30.972-0:01:31.238	BL	0.121284	8	0.45436
Trial 1	F1	P	F	0:01:31.238-0:01:31.504	BL	3.08723	8	11.5655		Trial 1	F5	UP	F	0:01:31.238-0:01:31.504	BL	0.647152	8	2.42438
Trial 1	F1	P	F	0:01:31.504-0:01:31.770	BL	0.51012	8	1.91104		Trial 1	F5	UP	F	0:01:31.504-0:01:31.770	BL	0.619431	8	2.32056
Trial 1	F1	P	F	0:01:31.770-0:01:32.036	BL	0.669837	8	2.5094		Trial 1	F5	UP	F	0:01:31.770-0:01:32.036	BL	0.562621	8	2.10771
Trial 1	F1	P	F	0:01:32.036-0:01:32.302	BL	0.912305	8	3.41772		Trial 1	F5	UP	F	0:01:32.036-0:01:32.302	BL	0.50486	8	1.89134
Trial 1	F1	P	F	0:01:32.302-0:01:32.568	BL	0.86072	8	3.22448		Trial 1	F5	UP	F	0:01:32.302-0:01:32.568	BL	0.888583	8	3.32887
Trial 1	F1	P	F	0:01:32.568-0:01:32.834	BL	1.90013	8	7.11834		Trial 1	F5	UP	F	0:01:32.568-0:01:32.834	BL	0.864076	8	3.23704
Trial 1	F1	P	F	0:01:32.834-0:01:33.100	BL	3.17718	8	11.9025		Trial 1	F5	UP	F	0:01:32.834-0:01:33.100	BL	0.875537	8	3.27998
Trial 1	F1	P	F	0:01:33.100-0:01:33.366	BL	1.74168	8	6.52484		Trial 1	F5	UP	F	0:01:33.100-0:01:33.366	BL	3.36524	8	12.607
Trial 1	F1	P	F	0:01:33.366-0:01:33.632	BL	2.48707	8	9.31717		Trial 1	F5	UP	F	0:01:33.366-0:01:33.632	BL	5.05489	8	18.9368
Trial 1	F1	P	F	0:01:33.632-0:01:33.898	BL	0.535469	8	2.00601		Trial 1	F5	UP	F	0:01:33.632-0:01:33.898	BL	4.36506	8	16.3526
Trial 1	F1	P	F	0:01:33.898-0:01:34.164	BL	1.54855	8	5.80124		Trial 1	F5	UP	F	0:01:33.898-0:01:34.164	BL	4.6648	8	17.4755
Trial 1	F1	P	F	0:01:34.164-0:01:34.430	BL	2.41268	8	9.03851		Trial 1	F5	UP	F	0:01:34.164-0:01:34.430	BL	4.12538	8	15.4547
Trial 1	F1	P	F	0:01:34.430-0:01:34.696	BL	0.612203	8	2.29347		Trial 1	F5	UP	F	0:01:34.430-0:01:34.696	BL	3.74917	8	14.0454
Trial 1	F1	P	F	0:01:34.696-0:01:34.962	BL	0.194727	8	0.729498		Trial 1	F5	UP	F	0:01:34.696-0:01:34.962	BL	2.17217	8	8.13748
Trial 1	F1	P	F	0:01:34.962-0:01:35.228	BL	0.157694	7	0.675155		Trial 1	F5	UP	F	0:01:34.962-0:01:35.228	BL	2.88429	7	12.3488
Trial 1	F1	P	F	0:01:35.228-0:01:35.494	BL	0.592431	8	2.21939		Trial 1	F5	UP	F	0:01:35.228-0:01:35.494	BL	0.652382	8	2.444
Trial 1	F1	P	F	0:01:35.494-0:01:35.760	BL	0.988117	8	3.70174		Trial 1	F5	UP	F	0:01:35.494-0:01:35.760	BL	0.644457	8	2.41429
Trial 1	F1	P	F	0:01:35.760-0:01:36.026	BL	0.263338	8	0.98653		Trial 1	F5	UP	F	0:01:35.760-0:01:36.026	BL	2.71162	8	10.1584
Trial 1	F1	P	F	0:01:36.026-0:01:36.292	BL	0.286336	8	1.07268		Trial 1	F5	UP	F	0:01:36.026-0:01:36.292	BL	0.471582	8	1.76666
Trial 1	F1	P	F	0:01:36.292-0:01:36.558	BL	0.379583	8	1.42201		Trial 1	F5	UP	F	0:01:36.292-0:01:36.558	BL	0.32482	8	1.21686
Trial 1	F1	P	F	0:01:36.558-0:01:36.824	BL	0.0834569	8	0.312651		Trial 1	F5	UP	F	0:01:36.558-0:01:36.824	BL	0.179036	8	0.670717
Trial 1	F1	P	F	0:01:36.824-0:01:37.090	BL	0.0834569	8	0.31265		Trial 1	F5	UP	F	0:01:36.824-0:01:37.090	BL	0.132262	8	0.495487
Trial 1	F1	P	F	0:01:37.090-0:01:37.356	BL	0.0834569	8	0.312651		Trial 1	F5	UP	F	0:01:37.090-0:01:37.356	BL	0.791074	8	2.96357
Trial 1	F1	P	F	0:01:37.356-0:01:37.622	BL	0.316505	8	1.18571		Trial 1	F5	UP	F	0:01:37.356-0:01:37.622	BL	1.08851	8	4.07782
Trial 1	F1	P	F	0:01:37.622-0:01:37.888	BL	0.514517	8	1.92751		Trial 1	F5	UP	F	0:01:37.622-0:01:37.888	BL	0.673224	8	2.52207
Trial 1	F1	P	F	0:01:37.888-0:01:38.154	BL	1.38481	8	5.18785		Trial 1	F5	UP	F	0:01:37.888-0:01:38.154	BL	0.534714	8	2.00318
Trial 1	F1	P	F	0:01:38.154-0:01:38.420	BL	0.715086	8	2.67888		Trial 1	F5	UP	F	0:01:38.154-0:01:38.420	BL	0.95537	8	3.57907
Trial 1	F1	P	F	0:01:38.420-0:01:38.686	BL	1.01994	8	3.82098		Trial 1	F5	UP	F	0:01:38.420-0:01:38.686	BL	0.554188	8	2.07613
Trial 1	F1	P	F	0:01:38.686-0:01:38.952	BL	1.45407	8	5.44731		Trial 1	F5	UP	F	0:01:38.686-0:01:38.952	BL	0.218768	8	0.81956
Trial 1	F1	P	F	0:01:38.952-0:01:39.218	BL	1.03889	8	3.89193		Trial 1	F5	UP	F	0:01:38.952-0:01:39.218	BL	0.613708	8	2.2991
Trial 1	F1	P	F	0:01:39.218-0:01:39.484	BL	1.49839	8	5.61337		Trial 1	F5	UP	F	0:01:39.218-0:01:39.484	BL	0.398508	8	1.49292
Trial 1	F1	P	F	0:01:39.484-0:01:39.750	BL	1.12063	8	4.19814		Trial 1	F5	UP	F	0:01:39.484-0:01:39.750	BL	0.186426	8	0.698397
Trial 1	F1	P	F	0:01:39.750-0:01:40.016	BL	1.03747	8	3.88663		Trial 1	F5	UP	F	0:01:39.750-0:01:40.016	BL	0.229055	8	0.858101
Trial 1	F1	P	F	0:01:40.016-0:01:40.282	BL	3.41638	8	12.7986		Trial 1	F5	UP	F	0:01:40.016-0:01:40.282	BL	0.0482652	8	0.180813
Trial 1	F1	P	F	0:01:40.282-0:01:40.548	BL	2.24449	8	8.40843		Trial 1	F5	UP	F	0:01:40.282-0:01:40.548	BL	0.342232	8	1.28208
Trial 1	F1	P	F	0:01:40.548-0:01:40.814	BL	1.61505	8	6.05042		Trial 1	F5	UP	F	0:01:40.548-0:01:40.814	BL	0.31685	8	1.187
Trial 1	F1	P	F	0:01:40.814-0:01:41.080	BL	4.89524	8	18.3387		Trial 1	F5	UP	F	0:01:40.814-0:01:41.080	BL	1.57274	8	5.89186
Trial 1	F1	P	F	0:01:41.080-0:01:41.346	BL	3.93974	8	14.7593		Trial 1	F5	UP	F	0:01:41.080-0:01:41.346	BL	0.803786	8	3.01119
Trial 1	F1	P	F	0:01:41.346-0:01:41.612	BL	5.01312	8	18.7804		Trial 1	F5	UP	F	0:01:41.346-0:01:41.612	BL	1.77434	8	6.64709
Trial 1	F1	P	F	0:01:41.612-0:01:41.878	BL	3.25498	8	12.194		Trial 1	F5	UP	F	0:01:41.612-0:01:41.878	BL	0.702748	8	2.63267
Trial 1	F1	P	F	0:01:41.878-0:01:42.144	BL	4.99949	8	18.7294		Trial 1	F5	UP	F	0:01:41.878-0:01:42.144	BL	0.482552	8	1.80776
Trial 1	F1	P	F	0:01:42.144-0:01:42.410	BL	2.26222	8	8.47483		Trial 1	F5	UP	F	0:01:42.144-0:01:42.410	BL	1.65806	8	6.21154
Trial 1	F1	P	F	0:01:42.410-0:01:42.676	BL	2.27308	8	8.51554		Trial 1	F5	UP	F	0:01:42.410-0:01:42.676	BL	1.22717	8	4.59731
Trial 1	F1	P	F	0:01:42.676-0:01:42.942	BL	1.21257	8	4.54257		Trial 1	F5	UP	F	0:01:42.676-0:01:42.942	BL	0.649046	8	2.43149
Trial 1	F1	P	F	0:01:42.942-0:01:43.208	BL	2.38403	8	8.93114		Trial 1	F5	UP	F	0:01:42.942-0:01:43.208	BL	0.308589	8	1.15605
Trial 1	F1	P	F	0:01:43.208-0:01:43.474	BL	1.92209	8	7.20064		Trial 1	F5	UP	F	0:01:43.208-0:01:43.474	BL	0.699655	8	2.62108
Trial 1	F1	P	F	0:01:43.474-0:01:43.740	BL	0.336974	8	1.26239		Trial 1	F5	UP	F	0:01:43.474-0:01:43.740	BL	0.933352	8	3.49658
Trial 1	F1	P	F	0:01:43.740-0:01:44.006	BL	0.386188	8	1.44676		Trial 1	F5	UP	F	0:01:43.740-0:01:44.006	BL	0.566568	8	2.12251
Trial 1	F1	P	F	0:01:44.006-0:01:44.272	BL	0.64146	8	2.40308		Trial 1	F5	UP	F	0:01:44.006-0:01:44.272	BL	0.357324	8	1.33864
Trial 1	F1	P	F	0:01:44.272-0:01:44.538	BL	0.96607	8	3.61913		Trial 1	F5	UP	F	0:01:44.272-0:01:44.538	BL	0.136656	8	0.511944
Trial 1	F1	P	F	0:01:44.538-0:01:44.804	BL	1.68775	7	7.22603		Trial 1	F5	UP	F	0:01:44.538-0:01:44.804	BL	0.349696	7	1.49719
Trial 1	F1	P	F	0:01:44.804-0:01:45.070	BL	1.82191	8	6.82532		Trial 1	F5	UP	F	0:01:44.804-0:01:45.070	BL	0.749668	8	2.80845
Trial 1	F1	P	F	0:01:45.070-0:01:45.336	BL	0.892348	8	3.34297		Trial 1	F5	UP	F	0:01:45.070-0:01:45.336	BL	2.05074	8	7.68258
Trial 1	F1	P	F	0:01:45.336-0:01:45.602	BL	2.13052	8	7.98147		Trial 1	F5	UP	F	0:01:45.336-0:01:45.602	BL	3.63301	8	13.6102
Trial 1	F1	P	F	0:01:45.602-0:01:45.868	BL	1.26347	8	4.73326		Trial 1	F5	UP	F	0:01:45.602-0:01:45.868	BL	2.24216	8	8.39969
Trial 1	F1	P	F	0:01:45.868-0:01:46.134	BL	1.14099	8	4.27445		Trial 1	F5	UP	F	0:01:45.868-0:01:46.134	BL	0.312105	8	1.16922
Trial 1	F1	P	F	0:01:46.134-0:01:46.400	BL	0.428627	8	1.60575		Trial 1	F5	UP	F	0:01:46.134-0:01:46.400	BL	0.237705	8	0.890504
Trial 1	F1	P	F	0:01:46.400-0:01:46.666	BL	0.562217	8	2.1062		Trial 1	F5	UP	F	0:01:46.400-0:01:46.666	BL	0.7197	8	2.69617
Trial 1	F1	P	F	0:01:46.666-0:01:46.932	BL	1.20384	8	4.50988		Trial 1	F5	UP	F	0:01:46.666-0:01:46.932	BL	1.72073	8	6.4463
Trial 1	F1	P	F	0:01:46.932-0:01:47.198	BL	1.72438	8	6.45997		Trial 1	F5	UP	F	0:01:46.932-0:01:47.198	BL	0.725946	8	2.71957
Trial 1	F1	P	F	0:01:47.198-0:01:47.464	BL	2.12224	8	7.95043		Trial 1	F5	UP	F	0:01:47.198-0:01:47.464	BL	1.84558	8	6.91399
Trial 1	F1	P	F	0:01:47.464-0:01:47.730	BL	1.53906	8	5.76573		Trial 1	F5	UP	F	0:01:47.464-0:01:47.730	BL	0.891133	8	3.33841
Trial 1	F1	P	F	0:01:47.730-0:01:47.996	BL	4.35177	8	16.3028		Trial 1	F5	UP	F	0:01:47.730-0:01:47.996	BL	1.00516	8	3.76558
Trial 1	F1	P	F	0:01:47.996-0:01:48.262	BL	4.7538	8	17.809		Trial 1	F5	UP	F	0:01:47.996-0:01:48.262	BL	0.983619	8	3.68489
Trial 1	F1	P	F	0:01:48.262-0:01:48.528	BL	2.15517	8	8.07379		Trial 1	F5	UP	F	0:01:48.262-0:01:48.528	BL	0.611074	8	2.28924
Trial 1	F1	P	F	0:01:48.528-0:01:48.794	BL	1.49446	8	5.59864		Trial 1	F5	UP	F	0:01:48.528-0:01:48.794	BL	2.2332	8	8.3661
Trial 1	F1	P	F	0:01:48.794-0:01:49.060	BL	1.40274	8	5.25503		Trial 1	F5	UP	F	0:01:48.794-0:01:49.060	BL	2.72913	8	10.224
Trial 1	F1	P	F	0:01:49.060-0:01:49.326	BL	0.272774	8	1.02188		Trial 1	F5	UP	F	0:01:49.060-0:01:49.326	BL	1.4436	8	5.4081
Trial 1	F1	P	F	0:01:49.326-0:01:49.592	BL	1.09589	8	4.10548		Trial 1	F5	UP	F	0:01:49.326-0:01:49.592	BL	0.483137	8	1.80996
Trial 1	F1	P	F	0:01:49.592-0:01:49.858	BL	2.22075	8	8.31946		Trial 1	F5	UP	F	0:01:49.592-0:01:49.858	BL	0.415007	8	1.55471
Trial 1	F1	P	F	0:01:49.858-0:01:50.124	BL	3.71107	8	13.9026		Trial 1	F5	UP	F	0:01:49.858-0:01:50.124	BL	1.94023	8	7.26858
Trial 1	F1	P	F	0:01:50.124-0:01:50.390	BL	4.33468	8	16.2388		Trial 1	F5	UP	F	0:01:50.124-0:01:50.390	BL	3.24646	8	12.1621
Trial 1	F1	P	F	0:01:50.390-0:01:50.656	BL	2.09554	8	7.8504		Trial 1	F5	UP	F	0:01:50.390-0:01:50.656	BL	3.44385	8	12.9016
Trial 1	F1	P	F	0:01:50.656-0:01:50.922	BL	0.656458	8	2.45926		Trial 1	F5	UP	F	0:01:50.656-0:01:50.922	BL	2.06909	8	7.75136
Trial 1	F1	P	F	0:01:50.922-0:01:51.188	BL	2.8705	8	10.7536		Trial 1	F5	UP	F	0:01:50.922-0:01:51.188	BL	2.85523	8	10.6964
Trial 1	F1	P	F	0:01:51.188-0:01:51.454	BL	3.03008	8	11.3514		Trial 1	F5	UP	F	0:01:51.188-0:01:51.454	BL	2.03301	8	7.61617
Trial 1	F1	P	F	0:01:51.454-0:01:51.720	BL	1.00757	8	3.77462		Trial 1	F5	UP	F	0:01:51.454-0:01:51.720	BL	0.654015	8	2.45011
Trial 1	F1	P	F	0:01:51.720-0:01:51.986	BL	1.3571	8	5.08403		Trial 1	F5	UP	F	0:01:51.720-0:01:51.986	BL	0.639296	8	2.39496
Trial 1	F1	P	F	0:01:51.986-0:01:52.252	BL	1.49511	8	5.60104		Trial 1	F5	UP	F	0:01:51.986-0:01:52.252	BL	0.706995	8	2.6486
Trial 1	F1	P	F	0:01:52.252-0:01:52.518	BL	0.874673	8	3.27674		Trial 1	F5	UP	F	0:01:52.252-0:01:52.518	BL	0.633539	8	2.37338
Trial 1	F1	P	F	0:01:52.518-0:01:52.784	BL	0.375125	8	1.40532		Trial 1	F5	UP	F	0:01:52.518-0:01:52.784	BL	0.381219	8	1.42815
Trial 1	F1	P	F	0:01:52.784-0:01:53.050	BL	0.253925	8	0.951275		Trial 1	F5	UP	F	0:01:52.784-0:01:53.050	BL	1.45704	8	5.45844
Trial 1	F1	P	F	0:01:53.050-0:01:53.316	BL	0.32852	8	1.23072		Trial 1	F5	UP	F	0:01:53.050-0:01:53.316	BL	0.922994	8	3.45776
Trial 1	F1	P	F	0:01:53.316-0:01:53.582	BL	1.16787	8	4.37515		Trial 1	F5	UP	F	0:01:53.316-0:01:53.582	BL	1.10003	8	4.12099
Trial 1	F1	P	F	0:01:53.582-0:01:53.848	BL	2.50246	8	9.37483		Trial 1	F5	UP	F	0:01:53.582-0:01:53.848	BL	1.36185	8	5.10181
Trial 1	F1	P	F	0:01:53.848-0:01:54.114	BL	3.77943	7	16.1813		Trial 1	F5	UP	F	0:01:53.848-0:01:54.114	BL	0.888875	7	3.80565
Trial 1	F1	P	F	0:01:54.114-0:01:54.380	BL	2.30632	8	8.64008		Trial 1	F5	UP	F	0:01:54.114-0:01:54.380	BL	1.37798	8	5.16229
Trial 1	F1	P	F	0:01:54.380-0:01:54.646	BL	1.31938	8	4.94273		Trial 1	F5	UP	F	0:01:54.380-0:01:54.646	BL	1.27169	8	4.76405
Trial 1	F1	P	F	0:01:54.646-0:01:54.912	BL	1.43846	8	5.3888		Trial 1	F5	UP	F	0:01:54.646-0:01:54.912	BL	2.41911	8	9.06257
Trial 1	F1	P	F	0:01:54.912-0:01:55.178	BL	1.95787	8	7.3347		Trial 1	F5	UP	F	0:01:54.912-0:01:55.178	BL	1.53016	8	5.73237
Trial 1	F1	P	F	0:01:55.178-0:01:55.444	BL	0.956539	8	3.58342		Trial 1	F5	UP	F	0:01:55.178-0:01:55.444	BL	1.13892	8	4.26666
Trial 1	F1	P	F	0:01:55.444-0:01:55.710	BL	3.04756	8	11.4169		Trial 1	F5	UP	F	0:01:55.444-0:01:55.710	BL	0.277138	8	1.03823
Trial 1	F1	P	F	0:01:55.710-0:01:55.976	BL	3.65109	8	13.6779		Trial 1	F5	UP	F	0:01:55.710-0:01:55.976	BL	0.991044	8	3.71269
Trial 1	F1	P	F	0:01:55.976-0:01:56.242	BL	2.89576	8	10.8482		Trial 1	F5	UP	F	0:01:55.976-0:01:56.242	BL	0.527185	8	1.97496
Trial 1	F1	P	F	0:01:56.242-0:01:56.508	BL	1.20399	8	4.51045		Trial 1	F5	UP	F	0:01:56.242-0:01:56.508	BL	1.01112	8	3.78791
Trial 1	F1	P	F	0:01:56.508-0:01:56.774	BL	0.562564	8	2.1075		Trial 1	F5	UP	F	0:01:56.508-0:01:56.774	BL	1.35287	8	5.06817
Trial 1	F1	P	F	0:01:56.774-0:01:57.040	BL	0.822684	8	3.082		Trial 1	F5	UP	F	0:01:56.774-0:01:57.040	BL	2.44104	8	9.14476
Trial 1	F1	P	F	0:01:57.040-0:01:57.306	BL	0.444426	8	1.66493		Trial 1	F5	UP	F	0:01:57.040-0:01:57.306	BL	3.55928	8	13.3339
Trial 1	F1	P	F	0:01:57.306-0:01:57.572	BL	1.45701	8	5.45831		Trial 1	F5	UP	F	0:01:57.306-0:01:57.572	BL	5.90231	8	22.1115
Trial 1	F1	P	F	0:01:57.572-0:01:57.838	BL	3.446	8	12.9096		Trial 1	F5	UP	F	0:01:57.572-0:01:57.838	BL	5.34753	8	20.0332
Trial 1	F1	P	F	0:01:57.838-0:01:58.104	BL	2.34373	8	8.78017		Trial 1	F5	UP	F	0:01:57.838-0:01:58.104	BL	4.07892	8	15.2806
Trial 1	F1	P	F	0:01:58.104-0:01:58.370	BL	0.683208	8	2.55947		Trial 1	F5	UP	F	0:01:58.104-0:01:58.370	BL	1.68464	8	6.31108
Trial 1	F1	P	F	0:01:58.370-0:01:58.636	BL	0.613178	8	2.29711		Trial 1	F5	UP	F	0:01:58.370-0:01:58.636	BL	1.76188	8	6.60045
Trial 1	F1	P	F	0:01:58.636-0:01:58.902	BL	1.15729	8	4.33546		Trial 1	F5	UP	F	0:01:58.636-0:01:58.902	BL	2.72409	8	10.2051
Trial 1	F1	P	F	0:01:58.902-0:01:59.168	BL	0.885023	8	3.31552		Trial 1	F5	UP	F	0:01:58.902-0:01:59.168	BL	2.50703	8	9.392
Trial 1	F1	P	F	0:01:59.168-0:01:59.434	BL	0.865327	8	3.24173		Trial 1	F5	UP	F	0:01:59.168-0:01:59.434	BL	3.61057	8	13.5261
Trial 1	F1	P	F	0:01:59.434-0:01:59.700	BL	1.02414	8	3.83669		Trial 1	F5	UP	F	0:01:59.434-0:01:59.700	BL	0.950827	8	3.56205
Trial 1	F1	P	F	0:01:59.700-0:01:59.966	BL	1.56008	8	5.84445		Trial 1	F5	UP	F	0:01:59.700-0:01:59.966	BL	1.84811	8	6.92348
Trial 1	F1	P	F	0:01:59.966-0:02:00.232	BL	0.313183	8	1.17326		Trial 1	F5	UP	F	0:01:59.966-0:02:00.232	BL	0.806909	8	3.02288
Trial 1	F1	P	F	0:02:00.232-0:02:00.498	BL	1.79509	8	6.72486		Trial 1	F5	UP	F	0:02:00.232-0:02:00.498	BL	0.651488	8	2.44063
Trial 1	F1	P	F	0:02:00.498-0:02:00.764	BL	1.3422	8	5.0282		Trial 1	F5	UP	F	0:02:00.498-0:02:00.764	BL	0.362756	8	1.35896
Trial 1	F1	P	F	0:02:00.764-0:02:01.030	BL	0.593319	8	2.22272		Trial 1	F5	UP	F	0:02:00.764-0:02:01.030	BL	0.661032	8	2.4764
Trial 1	F1	P	F	0:02:01.030-0:02:01.296	BL	1.55684	8	5.83231		Trial 1	F5	UP	F	0:02:01.030-0:02:01.296	BL	0.4406	8	1.65059
Trial 1	F1	P	F	0:02:01.296-0:02:01.562	BL	0.530513	8	1.98744		Trial 1	F5	UP	F	0:02:01.296-0:02:01.562	BL	0.30633	8	1.14758
Trial 1	F1	P	F	0:02:01.562-0:02:01.828	BL	0.310853	8	1.16453		Trial 1	F5	UP	F	0:02:01.562-0:02:01.828	BL	0.200962	8	0.752854
Trial 1	F1	P	F	0:02:01.828-0:02:02.094	BL	1.03582	8	3.88043		Trial 1	F5	UP	F	0:02:01.828-0:02:02.094	BL	0.24535	8	0.919141
Trial 1	F1	P	F	0:02:02.094-0:02:02.360	BL	1.09279	8	4.09386		Trial 1	F5	UP	F	0:02:02.094-0:02:02.360	BL	0.176153	8	0.659914
Trial 1	F1	P	F	0:02:02.360-0:02:02.626	BL	3.47704	8	13.0258		Trial 1	F5	UP	F	0:02:02.360-0:02:02.626	BL	0.230231	8	0.862503
Trial 1	F1	P	F	0:02:02.626-0:02:02.892	BL	3.30453	8	12.3796		Trial 1	F5	UP	F	0:02:02.626-0:02:02.892	BL	0.138273	8	0.518004
Trial 1	F1	P	F	0:02:02.892-0:02:03.158	BL	1.19811	8	4.48844		Trial 1	F5	UP	F	0:02:02.892-0:02:03.158	BL	0.403295	8	1.51084
Trial 1	F1	P	F	0:02:03.158-0:02:03.424	BL	0.686588	8	2.57212		Trial 1	F5	UP	F	0:02:03.158-0:02:03.424	BL	0.38614	8	1.44657
Trial 1	F1	P	F	0:02:03.424-0:02:03.690	BL	0.301704	7	1.29172		Trial 1	F5	UP	F	0:02:03.424-0:02:03.690	BL	0.115688	7	0.495308
Trial 1	F1	P	F	0:02:03.690-0:02:03.956	BL	1.22795	8	4.60024		Trial 1	F5	UP	F	0:02:03.690-0:02:03.956	BL	0.31416	8	1.17692
Trial 1	F1	P	F	0:02:03.956-0:02:04.222	BL	1.97378	8	7.39426		Trial 1	F5	UP	F	0:02:03.956-0:02:04.222	BL	0.19929	8	0.746587
Trial 1	F1	P	F	0:02:04.222-0:02:04.488	BL	1.90386	8	7.13229		Trial 1	F5	UP	F	0:02:04.222-0:02:04.488	BL	0.570202	8	2.13611
Trial 1	F1	P	F	0:02:04.488-0:02:04.754	BL	1.15265	8	4.31813		Trial 1	F5	UP	F	0:02:04.488-0:02:04.754	BL	0.902962	8	3.38273
Trial 1	F1	P	F	0:02:04.754-0:02:05.020	BL	1.34774	8	5.04898		Trial 1	F5	UP	F	0:02:04.754-0:02:05.020	BL	1.34308	8	5.03151
Trial 1	F1	P	F	0:02:05.020-0:02:05.286	BL	1.27226	8	4.76621		Trial 1	F5	UP	F	0:02:05.020-0:02:05.286	BL	0.21139	8	0.791922
Trial 1	F1	P	F	0:02:05.286-0:02:05.552	BL	2.79128	8	10.4569		Trial 1	F5	UP	F	0:02:05.286-0:02:05.552	BL	0.487804	8	1.82743
Trial 1	F1	P	F	0:02:05.552-0:02:05.818	BL	3.51005	8	13.1495		Trial 1	F5	UP	F	0:02:05.552-0:02:05.818	BL	0.910116	8	3.40953
Trial 1	F1	P	F	0:02:05.818-0:02:06.084	BL	4.0174	8	15.0502		Trial 1	F5	UP	F	0:02:05.818-0:02:06.084	BL	0.638622	8	2.39245
Trial 1	F1	P	F	0:02:06.084-0:02:06.350	BL	4.40116	8	16.4878		Trial 1	F5	UP	F	0:02:06.084-0:02:06.350	BL	0.724353	8	2.7136
Trial 1	F1	P	F	0:02:06.350-0:02:06.616	BL	4.54632	8	17.0317		Trial 1	F5	UP	F	0:02:06.350-0:02:06.616	BL	1.57082	8	5.88471
Trial 1	F1	P	F	0:02:06.616-0:02:06.882	BL	1.76244	8	6.60255		Trial 1	F5	UP	F	0:02:06.616-0:02:06.882	BL	1.8846	8	7.06017
Trial 1	F1	P	F	0:02:06.882-0:02:07.148	BL	2.73583	8	10.2491		Trial 1	F5	UP	F	0:02:06.882-0:02:07.148	BL	1.91996	8	7.19265
Trial 1	F1	P	F	0:02:07.148-0:02:07.414	BL	1.39713	8	5.23401		Trial 1	F5	UP	F	0:02:07.148-0:02:07.414	BL	3.71791	8	13.9282
Trial 1	F1	P	F	0:02:07.414-0:02:07.680	BL	1.19679	8	4.48347		Trial 1	F5	UP	F	0:02:07.414-0:02:07.680	BL	3.68774	8	13.8152
Trial 1	F1	P	F	0:02:07.680-0:02:07.946	BL	1.15125	8	4.31288		Trial 1	F5	UP	F	0:02:07.680-0:02:07.946	BL	3.52584	8	13.2087
Trial 1	F1	P	F	0:02:07.946-0:02:08.212	BL	1.67112	8	6.26041		Trial 1	F5	UP	F	0:02:07.946-0:02:08.212	BL	0.963854	8	3.61083
Trial 1	F1	P	F	0:02:08.212-0:02:08.478	BL	0.951697	8	3.56529		Trial 1	F5	UP	F	0:02:08.212-0:02:08.478	BL	0.701375	8	2.62753
Trial 1	F1	P	F	0:02:08.478-0:02:08.744	BL	0.303524	8	1.13708		Trial 1	F5	UP	F	0:02:08.478-0:02:08.744	BL	0.443536	8	1.6616
Trial 1	F1	P	F	0:02:08.744-0:02:09.010	BL	0.283936	8	1.06369		Trial 1	F5	UP	F	0:02:08.744-0:02:09.010	BL	0.22249	8	0.833502
Trial 1	F1	P	F	0:02:09.010-0:02:09.276	BL	1.17598	8	4.40552		Trial 1	F5	UP	F	0:02:09.010-0:02:09.276	BL	0.159545	8	0.597693
Trial 1	F1	P	F	0:02:09.276-0:02:09.542	BL	1.88749	8	7.07098		Trial 1	F5	UP	F	0:02:09.276-0:02:09.542	BL	0.121122	8	0.453752
Trial 1	F1	P	F	0:02:09.542-0:02:09.808	BL	1.72627	8	6.46705		Trial 1	F5	UP	F	0:02:09.542-0:02:09.808	BL	0.239439	8	0.896996
Trial 1	F1	P	F	0:02:09.808-0:02:10.074	BL	1.0629	8	3.98189		Trial 1	F5	UP	F	0:02:09.808-0:02:10.074	BL	0.699708	8	2.62129
Trial 1	F1	P	F	0:02:10.074-0:02:10.340	BL	0.471026	8	1.76457		Trial 1	F5	UP	F	0:02:10.074-0:02:10.340	BL	2.23914	8	8.38838
Trial 1	F1	P	F	0:02:10.340-0:02:10.606	BL	0.339949	8	1.27353		Trial 1	F5	UP	F	0:02:10.340-0:02:10.606	BL	1.88593	8	7.06514
Trial 1	F1	P	F	0:02:10.606-0:02:10.872	BL	0.295557	8	1.10723		Trial 1	F5	UP	F	0:02:10.606-0:02:10.872	BL	1.89214	8	7.08841
Trial 1	F1	P	F	0:02:10.872-0:02:11.138	BL	0.782853	8	2.93277		Trial 1	F5	UP	F	0:02:10.872-0:02:11.138	BL	2.04651	8	7.66674
Trial 1	F1	P	F	0:02:11.138-0:02:11.404	BL	1.77544	8	6.65125		Trial 1	F5	UP	F	0:02:11.138-0:02:11.404	BL	2.68942	8	10.0753
Trial 1	F1	P	F	0:02:11.404-0:02:11.670	BL	1.25428	8	4.69882		Trial 1	F5	UP	F	0:02:11.404-0:02:11.670	BL	1.39992	8	5.24444
Trial 1	F1	P	F	0:02:11.670-0:02:11.936	BL	0.679518	8	2.54567		Trial 1	F5	UP	F	0:02:11.670-0:02:11.936	BL	0.346024	8	1.2963
Trial 1	F1	P	F	0:02:11.936-0:02:12.202	BL	0.795513	8	2.98018		Trial 1	F5	UP	F	0:02:11.936-0:02:12.202	BL	0.336962	8	1.26234
Trial 1	F1	P	F	0:02:12.202-0:02:12.468	BL	0.601539	8	2.2535		Trial 1	F5	UP	F	0:02:12.202-0:02:12.468	BL	0.16155	8	0.605205
Trial 1	F1	P	F	0:02:12.468-0:02:12.734	BL	0.424861	8	1.59164		Trial 1	F5	UP	F	0:02:12.468-0:02:12.734	BL	0.555594	8	2.0814
Trial 1	F1	P	F	0:02:12.734-0:02:13.000	BL	0.690293	8	2.58601		Trial 1	F5	UP	F	0:02:12.734-0:02:13.000	BL	0.446685	8	1.67339
Trial 1	F1	P	F	0:02:13.000-0:02:13.266	BL	1.37245	7	5.87603		Trial 1	F5	UP	F	0:02:13.000-0:02:13.266	BL	0.0794558	7	0.340185
Trial 1	F1	P	F	0:02:13.266-0:02:13.532	BL	1.96312	8	7.35436		Trial 1	F5	UP	F	0:02:13.266-0:02:13.532	BL	0.226513	8	0.848572
Trial 1	F1	P	F	0:02:13.532-0:02:13.798	BL	1.11484	8	4.17647		Trial 1	F5	UP	F	0:02:13.532-0:02:13.798	BL	0.10333	8	0.387099
Trial 1	F1	P	F	0:02:13.798-0:02:14.064	BL	0.753419	8	2.8225		Trial 1	F5	UP	F	0:02:13.798-0:02:14.064	BL	0.500418	8	1.8747
Trial 1	F1	P	F	0:02:14.064-0:02:14.330	BL	2.53252	8	9.48746		Trial 1	F5	UP	F	0:02:14.064-0:02:14.330	BL	0.40363	8	1.51209
Trial 1	F1	P	F	0:02:14.330-0:02:14.596	BL	3.68925	8	13.8208		Trial 1	F5	UP	F	0:02:14.330-0:02:14.596	BL	1.68433	8	6.30993
Trial 1	F1	P	F	0:02:14.596-0:02:14.862	BL	3.40392	8	12.7519		Trial 1	F5	UP	F	0:02:14.596-0:02:14.862	BL	0.537108	8	2.01215
Trial 1	F1	P	F	0:02:14.862-0:02:15.128	BL	5.56751	8	20.8573		Trial 1	F5	UP	F	0:02:14.862-0:02:15.128	BL	0.608629	8	2.28007
Trial 1	F1	P	F	0:02:15.128-0:02:15.394	BL	3.60217	8	13.4947		Trial 1	F5	UP	F	0:02:15.128-0:02:15.394	BL	1.39085	8	5.21047
Trial 1	F1	P	F	0:02:15.394-0:02:15.660	BL	0.806354	8	3.02079		Trial 1	F5	UP	F	0:02:15.394-0:02:15.660	BL	2.09405	8	7.84482
Trial 1	F1	P	F	0:02:15.660-0:02:15.926	BL	1.075	8	4.0272		Trial 1	F5	UP	F	0:02:15.660-0:02:15.926	BL	3.58312	8	13.4232
Trial 1	F1	P	F	0:02:15.926-0:02:16.192	BL	1.55979	8	5.8434		Trial 1	F5	UP	F	0:02:15.926-0:02:16.192	BL	3.73242	8	13.9826
Trial 1	F1	P	F	0:02:16.192-0:02:16.458	BL	0.253246	8	0.948719		Trial 1	F5	UP	F	0:02:16.192-0:02:16.458	BL	4.44376	8	16.6474
Trial 1	F1	P	F	0:02:16.458-0:02:16.724	BL	0.183385	8	0.687007		Trial 1	F5	UP	F	0:02:16.458-0:02:16.724	BL	3.37425	8	12.6408
Trial 1	F1	P	F	0:02:16.724-0:02:16.990	BL	0.165855	8	0.621334		Trial 1	F5	UP	F	0:02:16.724-0:02:16.990	BL	2.79091	8	10.4555
Trial 1	F1	P	F	0:02:16.990-0:02:17.256	BL	0.0878944	8	0.329272		Trial 1	F5	UP	F	0:02:16.990-0:02:17.256	BL	3.27616	8	12.2733
Trial 1	F1	P	F	0:02:17.256-0:02:17.522	BL	0.120583	8	0.451731		Trial 1	F5	UP	F	0:02:17.256-0:02:17.522	BL	0.837619	8	3.13795
Trial 1	F1	P	F	0:02:17.522-0:02:17.788	BL	0.179469	8	0.672331		Trial 1	F5	UP	F	0:02:17.522-0:02:17.788	BL	0.592468	8	2.21953
Trial 1	F1	P	F	0:02:17.788-0:02:18.054	BL	0.18741	8	0.702084		Trial 1	F5	UP	F	0:02:17.788-0:02:18.054	BL	0.845502	8	3.16748
Trial 1	F1	P	F	0:02:18.054-0:02:18.320	BL	0.719009	8	2.69358		Trial 1	F5	UP	F	0:02:18.054-0:02:18.320	BL	0.983772	8	3.68544
Trial 1	F1	P	F	0:02:18.320-0:02:18.586	BL	1.01863	8	3.81603		Trial 1	F5	UP	F	0:02:18.320-0:02:18.586	BL	1.12259	8	4.20553
Trial 1	F1	P	F	0:02:18.586-0:02:18.852	BL	2.24153	8	8.39733		Trial 1	F5	UP	F	0:02:18.586-0:02:18.852	BL	0.988159	8	3.70191
Trial 1	F1	P	F	0:02:18.852-0:02:19.118	BL	1.07622	8	4.03179		Trial 1	F5	UP	F	0:02:18.852-0:02:19.118	BL	0.564784	8	2.11581
Trial 1	F1	P	F	0:02:19.118-0:02:19.384	BL	2.70689	8	10.1407		Trial 1	F5	UP	F	0:02:19.118-0:02:19.384	BL	1.60925	8	6.02863
Trial 1	F1	P	F	0:02:19.384-0:02:19.650	BL	1.63978	8	6.14303		Trial 1	F5	UP	F	0:02:19.384-0:02:19.650	BL	1.37959	8	5.16827
Trial 1	F1	P	F	0:02:19.650-0:02:19.916	BL	2.10854	8	7.89908		Trial 1	F5	UP	F	0:02:19.650-0:02:19.916	BL	0.44182	8	1.65517
Trial 1	F1	P	F	0:02:19.916-0:02:20.182	BL	1.41661	8	5.30698		Trial 1	F5	UP	F	0:02:19.916-0:02:20.182	BL	0.190933	8	0.71528
Trial 1	F1	P	F	0:02:20.182-0:02:20.448	BL	2.33718	8	8.75566		Trial 1	F5	UP	F	0:02:20.182-0:02:20.448	BL	0.444137	8	1.66385
Trial 1	F1	P	F	0:02:20.448-0:02:20.714	BL	0.428864	8	1.60663		Trial 1	F5	UP	F	0:02:20.448-0:02:20.714	BL	0.43331	8	1.62329
Trial 1	F1	P	F	0:02:20.714-0:02:20.980	BL	1.79013	8	6.70628		Trial 1	F5	UP	F	0:02:20.714-0:02:20.980	BL	0.481558	8	1.80403
Trial 1	F1	P	F	0:02:20.980-0:02:21.246	BL	4.29011	8	16.0718		Trial 1	F5	UP	F	0:02:20.980-0:02:21.246	BL	0.451834	8	1.69268
Trial 1	F1	P	F	0:02:21.246-0:02:21.512	BL	5.72292	8	21.4395		Trial 1	F5	UP	F	0:02:21.246-0:02:21.512	BL	0.634271	8	2.37615
Trial 1	F1	P	F	0:02:21.512-0:02:21.778	BL	4.99866	8	18.7262		Trial 1	F5	UP	F	0:02:21.512-0:02:21.778	BL	1.08319	8	4.0579
Trial 1	F1	P	F	0:02:21.778-0:02:22.044	BL	5.16009	8	19.331		Trial 1	F5	UP	F	0:02:21.778-0:02:22.044	BL	1.31353	8	4.92083
Trial 1	F1	P	F	0:02:22.044-0:02:22.310	BL	2.01972	8	7.56633		Trial 1	F5	UP	F	0:02:22.044-0:02:22.310	BL	0.303871	8	1.13837
Trial 1	F1	P	F	0:02:22.310-0:02:22.576	BL	1.79817	8	6.73641		Trial 1	F5	UP	F	0:02:22.310-0:02:22.576	BL	0.504847	8	1.89128
Trial 1	F1	P	F	0:02:22.576-0:02:22.842	BL	6.51553	7	27.8956		Trial 1	F5	UP	F	0:02:22.576-0:02:22.842	BL	0.687814	7	2.94482
Trial 1	F1	P	F	0:02:22.842-0:02:23.108	BL	2.03419	8	7.62061		Trial 1	F5	UP	F	0:02:22.842-0:02:23.108	BL	1.45535	8	5.45212
Trial 1	F1	P	F	0:02:23.108-0:02:23.374	BL	1.03823	8	3.88949		Trial 1	F5	UP	F	0:02:23.108-0:02:23.374	BL	0.455299	8	1.70566
Trial 1	F1	P	F	0:02:23.374-0:02:23.640	BL	1.03318	8	3.87057		Trial 1	F5	UP	F	0:02:23.374-0:02:23.640	BL	0.233376	8	0.874287
Trial 1	F1	P	F	0:02:23.640-0:02:23.906	BL	0.566506	8	2.12227		Trial 1	F5	UP	F	0:02:23.640-0:02:23.906	BL	0.119148	8	0.446356
Trial 1	F1	P	F	0:02:23.906-0:02:24.172	BL	6.56235	8	24.584		Trial 1	F5	UP	F	0:02:23.906-0:02:24.172	BL	0.0882988	8	0.33079
Trial 1	F1	P	F	0:02:24.172-0:02:24.438	BL	3.67459	8	13.7661		Trial 1	F5	UP	F	0:02:24.172-0:02:24.438	BL	0.12926	8	0.484243
Trial 1	F1	P	F	0:02:24.438-0:02:24.704	BL	1.66696	8	6.24486		Trial 1	F5	UP	F	0:02:24.438-0:02:24.704	BL	0.136593	8	0.511712
Trial 1	F1	P	F	0:02:24.704-0:02:24.970	BL	1.21861	8	4.56523		Trial 1	F5	UP	F	0:02:24.704-0:02:24.970	BL	0.906298	8	3.39522
Trial 1	F1	P	F	0:02:24.970-0:02:25.236	BL	0.380387	8	1.42502		Trial 1	F5	UP	F	0:02:24.970-0:02:25.236	BL	1.58581	8	5.94086
Trial 1	F1	P	F	0:02:25.236-0:02:25.502	BL	0.347239	8	1.30084		Trial 1	F5	UP	F	0:02:25.236-0:02:25.502	BL	4.46412	8	16.7237
Trial 1	F1	P	F	0:02:25.502-0:02:25.768	BL	2.13738	8	8.00717		Trial 1	F5	UP	F	0:02:25.502-0:02:25.768	BL	3.41902	8	12.8086
Trial 1	F1	P	F	0:02:25.768-0:02:26.034	BL	2.85665	8	10.7017		Trial 1	F5	UP	F	0:02:25.768-0:02:26.034	BL	1.82557	8	6.83905
Trial 1	F1	P	F	0:02:26.034-0:02:26.300	BL	1.41944	8	5.31758		Trial 1	F5	UP	F	0:02:26.034-0:02:26.300	BL	0.560644	8	2.10032
Trial 1	F1	P	F	0:02:26.300-0:02:26.566	BL	3.01758	8	11.3046		Trial 1	F5	UP	F	0:02:26.300-0:02:26.566	BL	0.55798	8	2.09032
Trial 1	F1	P	F	0:02:26.566-0:02:26.832	BL	3.56816	8	13.3672		Trial 1	F5	UP	F	0:02:26.566-0:02:26.832	BL	0.753723	8	2.82363
Trial 1	F1	P	F	0:02:26.832-0:02:27.098	BL	1.26716	8	4.74713		Trial 1	F5	UP	F	0:02:26.832-0:02:27.098	BL	0.166778	8	0.624791
Trial 1	F1	P	F	0:02:27.098-0:02:27.364	BL	0.49995	8	1.87294		Trial 1	F5	UP	F	0:02:27.098-0:02:27.364	BL	0.197793	8	0.740982
Trial 1	F1	P	F	0:02:27.364-0:02:27.630	BL	0.305757	8	1.14545		Trial 1	F5	UP	F	0:02:27.364-0:02:27.630	BL	0.135546	8	0.507791
Trial 1	F1	P	F	0:02:27.630-0:02:27.896	BL	0.663431	8	2.48538		Trial 1	F5	UP	F	0:02:27.630-0:02:27.896	BL	0.929055	8	3.48048
Trial 1	F1	P	F	0:02:27.896-0:02:28.162	BL	1.00708	8	3.77274		Trial 1	F5	UP	F	0:02:27.896-0:02:28.162	BL	1.54019	8	5.76993
Trial 1	F1	P	F	0:02:28.162-0:02:28.428	BL	4.07935	8	15.2823		Trial 1	F5	UP	F	0:02:28.162-0:02:28.428	BL	1.50038	8	5.62081
Trial 1	F1	P	F	0:02:28.428-0:02:28.694	BL	5.68531	8	21.2986		Trial 1	F5	UP	F	0:02:28.428-0:02:28.694	BL	3.73835	8	14.0048
Trial 1	F1	P	F	0:02:28.694-0:02:28.960	BL	4.29519	8	16.0909		Trial 1	F5	UP	F	0:02:28.694-0:02:28.960	BL	2.19816	8	8.23489
Trial 1	F1	P	F	0:02:28.960-0:02:29.226	BL	3.66225	8	13.7197		Trial 1	F5	UP	F	0:02:28.960-0:02:29.226	BL	2.17572	8	8.15076
Trial 1	F1	P	F	0:02:29.226-0:02:29.492	BL	2.08537	8	7.81229		Trial 1	F5	UP	F	0:02:29.226-0:02:29.492	BL	0.823817	8	3.08623
Trial 1	F1	P	F	0:02:29.492-0:02:29.758	BL	1.45259	8	5.4418		Trial 1	F5	UP	F	0:02:29.492-0:02:29.758	BL	0.507696	8	1.90197
Trial 1	F1	P	F	0:02:29.758-0:02:30.024	BL	1.4571	8	5.45865		Trial 1	F5	UP	F	0:02:29.758-0:02:30.024	BL	0.910594	8	3.4113
Trial 1	F1	P	F	0:02:30.024-0:02:30.290	BL	3.17876	8	11.9084		Trial 1	F5	UP	F	0:02:30.024-0:02:30.290	BL	2.42499	8	9.08463
Trial 1	F1	P	F	0:02:30.290-0:02:30.556	BL	2.41015	8	9.02903		Trial 1	F5	UP	F	0:02:30.290-0:02:30.556	BL	2.2405	8	8.39347
Trial 1	F1	P	F	0:02:30.556-0:02:30.822	BL	1.95976	8	7.34174		Trial 1	F5	UP	F	0:02:30.556-0:02:30.822	BL	2.80762	8	10.518
Trial 1	F1	P	F	0:02:30.822-0:02:31.088	BL	2.87692	8	10.7777		Trial 1	F5	UP	F	0:02:30.822-0:02:31.088	BL	1.30018	8	4.87081
Trial 1	F1	P	F	0:02:31.088-0:02:31.354	BL	1.31846	8	4.93927		Trial 1	F5	UP	F	0:02:31.088-0:02:31.354	BL	1.0417	8	3.90246
Trial 1	F1	P	F	0:02:31.354-0:02:31.620	BL	1.03609	8	3.88146		Trial 1	F5	UP	F	0:02:31.354-0:02:31.620	BL	0.566899	8	2.12375
Trial 1	F1	P	F	0:02:31.620-0:02:31.886	BL	1.23609	8	4.63069		Trial 1	F5	UP	F	0:02:31.620-0:02:31.886	BL	2.75094	8	10.3057
Trial 1	F1	P	F	0:02:31.886-0:02:32.152	BL	0.622628	7	2.66574		Trial 1	F5	UP	F	0:02:31.886-0:02:32.152	BL	3.44427	7	14.7464
Trial 1	F1	P	F	0:02:32.152-0:02:32.418	BL	2.47384	8	9.26763		Trial 1	F5	UP	F	0:02:32.152-0:02:32.418	BL	1.79901	8	6.73956
Trial 1	F1	P	F	0:02:32.418-0:02:32.684	BL	1.39276	8	5.21761		Trial 1	F5	UP	F	0:02:32.418-0:02:32.684	BL	0.247599	8	0.927564
Trial 1	F1	P	F	0:02:32.684-0:02:32.950	BL	1.88216	8	7.05103		Trial 1	F5	UP	F	0:02:32.684-0:02:32.950	BL	1.96774	8	7.37163
Trial 1	F1	P	F	0:02:32.950-0:02:33.216	BL	1.20817	8	4.52613		Trial 1	F5	UP	F	0:02:32.950-0:02:33.216	BL	4.07623	8	15.2706
Trial 1	F1	P	F	0:02:33.216-0:02:33.482	BL	1.52505	8	5.71322		Trial 1	F5	UP	F	0:02:33.216-0:02:33.482	BL	3.38497	8	12.6809
Trial 1	F1	P	F	0:02:33.482-0:02:33.748	BL	1.38402	8	5.18491		Trial 1	F5	UP	F	0:02:33.482-0:02:33.748	BL	2.1354	8	7.99977
Trial 1	F1	P	F	0:02:33.748-0:02:34.014	BL	1.35778	8	5.08656		Trial 1	F5	UP	F	0:02:33.748-0:02:34.014	BL	3.01942	8	11.3115
Trial 1	F1	P	F	0:02:34.014-0:02:34.280	BL	0.784739	8	2.93982		Trial 1	F5	UP	F	0:02:34.014-0:02:34.280	BL	1.69404	8	6.34632
Trial 1	F1	P	F	0:02:34.280-0:02:34.546	BL	0.427906	8	1.60305		Trial 1	F5	UP	F	0:02:34.280-0:02:34.546	BL	0.78037	8	2.92348
Trial 1	F1	P	F	0:02:34.546-0:02:34.812	BL	0.630303	8	2.36129		Trial 1	F5	UP	F	0:02:34.546-0:02:34.812	BL	0.541254	8	2.02767
Trial 1	F1	P	F	0:02:34.812-0:02:35.078	BL	0.464632	8	1.74062		Trial 1	F5	UP	F	0:02:34.812-0:02:35.078	BL	0.870939	8	3.26275
Trial 1	F1	P	F	0:02:35.078-0:02:35.344	BL	0.980473	8	3.67309		Trial 1	F5	UP	F	0:02:35.078-0:02:35.344	BL	1.03015	8	3.85921
Trial 1	F1	P	F	0:02:35.344-0:02:35.610	BL	0.328363	8	1.23013		Trial 1	F5	UP	F	0:02:35.344-0:02:35.610	BL	0.918328	8	3.44028
Trial 1	F1	P	F	0:02:35.610-0:02:35.876	BL	0.195614	8	0.73282		Trial 1	F5	UP	F	0:02:35.610-0:02:35.876	BL	0.803909	8	3.01165
Trial 1	F1	P	F	0:02:35.876-0:02:36.142	BL	0.434867	8	1.62912		Trial 1	F5	UP	F	0:02:35.876-0:02:36.142	BL	0.502438	8	1.88225
Trial 1	F1	P	F	0:02:36.142-0:02:36.408	BL	0.727576	8	2.72569		Trial 1	F5	UP	F	0:02:36.142-0:02:36.408	BL	2.29081	8	8.58199
Trial 1	F1	P	F	0:02:36.408-0:02:36.674	BL	1.20755	8	4.52381		Trial 1	F5	UP	F	0:02:36.408-0:02:36.674	BL	4.05115	8	15.1767
Trial 1	F1	P	F	0:02:36.674-0:02:36.940	BL	1.26442	8	4.73685		Trial 1	F5	UP	F	0:02:36.674-0:02:36.940	BL	2.75681	8	10.3277
Trial 1	F1	P	F	0:02:36.940-0:02:37.206	BL	0.340982	8	1.27741		Trial 1	F5	UP	F	0:02:36.940-0:02:37.206	BL	2.85096	8	10.6804
Trial 1	F1	P	F	0:02:37.206-0:02:37.472	BL	0.161018	8	0.603212		Trial 1	F5	UP	F	0:02:37.206-0:02:37.472	BL	1.95768	8	7.33392
Trial 1	F1	P	F	0:02:37.472-0:02:37.738	BL	0.137536	8	0.515244		Trial 1	F5	UP	F	0:02:37.472-0:02:37.738	BL	2.4258	8	9.08768
Trial 1	F1	P	F	0:02:37.738-0:02:38.004	BL	0.374896	8	1.40446		Trial 1	F5	UP	F	0:02:37.738-0:02:38.004	BL	1.10234	8	4.12963
Trial 1	F1	P	F	0:02:38.004-0:02:38.270	BL	1.09829	8	4.11447		Trial 1	F5	UP	F	0:02:38.004-0:02:38.270	BL	0.592769	8	2.22066
Trial 1	F1	P	F	0:02:38.270-0:02:38.536	BL	1.22896	8	4.604		Trial 1	F5	UP	F	0:02:38.270-0:02:38.536	BL	0.89801	8	3.36417
Trial 1	F1	P	F	0:02:38.536-0:02:38.802	BL	3.17738	8	11.9033		Trial 1	F5	UP	F	0:02:38.536-0:02:38.802	BL	0.704408	8	2.63889
Trial 1	F1	P	F	0:02:38.802-0:02:39.068	BL	4.53957	8	17.0064		Trial 1	F5	UP	F	0:02:38.802-0:02:39.068	BL	2.21635	8	8.30304
Trial 1	F1	P	F	0:02:39.068-0:02:39.334	BL	2.82803	8	10.5945		Trial 1	F5	UP	F	0:02:39.068-0:02:39.334	BL	5.09585	8	19.0903
Trial 1	F1	P	F	0:02:39.334-0:02:39.600	BL	2.25693	8	8.45499		Trial 1	F5	UP	F	0:02:39.334-0:02:39.600	BL	5.55398	8	20.8066
Trial 1	F1	P	F	0:02:39.600-0:02:39.866	BL	2.75994	8	10.3394		Trial 1	F5	UP	F	0:02:39.600-0:02:39.866	BL	4.91412	8	18.4095
Trial 1	F1	P	F	0:02:39.866-0:02:40.132	BL	2.18991	8	8.20394		Trial 1	F5	UP	F	0:02:39.866-0:02:40.132	BL	2.3722	8	8.88685
Trial 1	F1	P	F	0:02:40.132-0:02:40.398	BL	0.513123	8	1.92229		Trial 1	F5	UP	F	0:02:40.132-0:02:40.398	BL	1.67405	8	6.27145
Trial 1	F1	P	F	0:02:40.398-0:02:40.664	BL	0.230371	8	0.863028		Trial 1	F5	UP	F	0:02:40.398-0:02:40.664	BL	1.98547	8	7.43805
Trial 1	F1	P	F	0:02:40.664-0:02:40.930	BL	0.126302	8	0.473157		Trial 1	F5	UP	F	0:02:40.664-0:02:40.930	BL	2.26186	8	8.47346
Trial 1	F1	P	F	0:02:40.930-0:02:41.196	BL	0.203566	8	0.762613		Trial 1	F5	UP	F	0:02:40.930-0:02:41.196	BL	2.19144	8	8.20972
Trial 1	F1	P	F	0:02:41.196-0:02:41.462	BL	0.241529	8	0.904827		Trial 1	F5	UP	F	0:02:41.196-0:02:41.462	BL	2.98146	8	11.1693
Trial 1	F1	P	F	0:02:41.462-0:02:41.728	BL	0.320873	7	1.3738		Trial 1	F5	UP	F	0:02:41.462-0:02:41.728	BL	0.955811	7	4.09226
Trial 1	F1	P	F	0:02:41.728-0:02:41.994	BL	0.240027	8	0.8992		Trial 1	F5	UP	F	0:02:41.728-0:02:41.994	BL	0.503913	8	1.88779
Trial 1	F1	P	F	0:02:41.994-0:02:42.260	BL	0.199191	8	0.746219		Trial 1	F5	UP	F	0:02:41.994-0:02:42.260	BL	0.451744	8	1.69234
Trial 1	F1	P	F	0:02:42.260-0:02:42.526	BL	0.155261	8	0.581645		Trial 1	F5	UP	F	0:02:42.260-0:02:42.526	BL	0.729845	8	2.73417
Trial 1	F1	P	F	0:02:42.526-0:02:42.792	BL	0.208547	8	0.781271		Trial 1	F5	UP	F	0:02:42.526-0:02:42.792	BL	2.0804	8	7.7937
Trial 1	F1	P	F	0:02:42.792-0:02:43.058	BL	0.85039	8	3.18577		Trial 1	F5	UP	F	0:02:42.792-0:02:43.058	BL	0.946367	8	3.54533
Trial 1	F1	P	F	0:02:43.058-0:02:43.324	BL	0.371903	8	1.39324		Trial 1	F5	UP	F	0:02:43.058-0:02:43.324	BL	2.72208	8	10.1976
Trial 1	F1	P	F	0:02:43.324-0:02:43.590	BL	0.520951	8	1.95161		Trial 1	F5	UP	F	0:02:43.324-0:02:43.590	BL	1.29932	8	4.86755
Trial 1	F1	P	F	0:02:43.590-0:02:43.856	BL	0.562984	8	2.10907		Trial 1	F5	UP	F	0:02:43.590-0:02:43.856	BL	1.64929	8	6.17863
Trial 1	F1	P	F	0:02:43.856-0:02:44.122	BL	1.38292	8	5.18075		Trial 1	F5	UP	F	0:02:43.856-0:02:44.122	BL	1.69182	8	6.33798
Trial 1	F1	P	F	0:02:44.122-0:02:44.388	BL	0.942736	8	3.53171		Trial 1	F5	UP	F	0:02:44.122-0:02:44.388	BL	0.515466	8	1.93106
Trial 1	F1	P	F	0:02:44.388-0:02:44.654	BL	0.608634	8	2.2801		Trial 1	F5	UP	F	0:02:44.388-0:02:44.654	BL	0.327083	8	1.22534
Trial 1	F1	P	F	0:02:44.654-0:02:44.920	BL	0.540177	8	2.02363		Trial 1	F5	UP	F	0:02:44.654-0:02:44.920	BL	1.47829	8	5.53802
Trial 1	F1	P	F	0:02:44.920-0:02:45.186	BL	1.67762	8	6.28477		Trial 1	F5	UP	F	0:02:44.920-0:02:45.186	BL	4.10355	8	15.3729
Trial 1	F1	P	F	0:02:45.186-0:02:45.452	BL	1.12697	8	4.22192		Trial 1	F5	UP	F	0:02:45.186-0:02:45.452	BL	4.21932	8	15.8067
Trial 1	F1	P	F	0:02:45.452-0:02:45.718	BL	0.526704	8	1.97317		Trial 1	F5	UP	F	0:02:45.452-0:02:45.718	BL	2.37095	8	8.88214
Trial 1	F1	P	F	0:02:45.718-0:02:45.984	BL	1.85988	8	6.96759		Trial 1	F5	UP	F	0:02:45.718-0:02:45.984	BL	2.78829	8	10.4456
Trial 1	F1	P	F	0:02:45.984-0:02:46.250	BL	2.1512	8	8.0589		Trial 1	F5	UP	F	0:02:45.984-0:02:46.250	BL	3.03866	8	11.3836
Trial 1	F1	P	F	0:02:46.250-0:02:46.516	BL	2.53177	8	9.48465		Trial 1	F5	UP	F	0:02:46.250-0:02:46.516	BL	2.3431	8	8.77781
Trial 1	F1	P	F	0:02:46.516-0:02:46.782	BL	3.51158	8	13.1553		Trial 1	F5	UP	F	0:02:46.516-0:02:46.782	BL	1.38108	8	5.17389
Trial 1	F1	P	F	0:02:46.782-0:02:47.048	BL	5.85108	8	21.9196		Trial 1	F5	UP	F	0:02:46.782-0:02:47.048	BL	2.03117	8	7.60928
Trial 1	F1	P	F	0:02:47.048-0:02:47.314	BL	4.74337	8	17.7699		Trial 1	F5	UP	F	0:02:47.048-0:02:47.314	BL	1.62771	8	6.09783
Trial 1	F1	P	F	0:02:47.314-0:02:47.580	BL	3.52176	8	13.1934		Trial 1	F5	UP	F	0:02:47.314-0:02:47.580	BL	0.560001	8	2.0979
Trial 1	F1	P	F	0:02:47.580-0:02:47.846	BL	3.59784	8	13.4784		Trial 1	F5	UP	F	0:02:47.580-0:02:47.846	BL	2.47624	8	9.27663
Trial 1	F1	P	F	0:02:47.846-0:02:48.112	BL	1.30665	8	4.89506		Trial 1	F5	UP	F	0:02:47.846-0:02:48.112	BL	2.18547	8	8.18733
Trial 1	F1	P	F	0:02:48.112-0:02:48.378	BL	0.371588	8	1.39206		Trial 1	F5	UP	F	0:02:48.112-0:02:48.378	BL	0.613047	8	2.29663
Trial 1	F1	P	F	0:02:48.378-0:02:48.644	BL	0.732004	8	2.74227		Trial 1	F5	UP	F	0:02:48.378-0:02:48.644	BL	0.294328	8	1.10263
Trial 1	F1	P	F	0:02:48.644-0:02:48.910	BL	1.58724	8	5.94617		Trial 1	F5	UP	F	0:02:48.644-0:02:48.910	BL	0.141208	8	0.529
Trial 1	F1	P	F	0:02:48.910-0:02:49.176	BL	0.866727	8	3.24697		Trial 1	F5	UP	F	0:02:48.910-0:02:49.176	BL	0.161327	8	0.604371
Trial 1	F1	P	F	0:02:49.176-0:02:49.442	BL	0.186476	8	0.698588		Trial 1	F5	UP	F	0:02:49.176-0:02:49.442	BL	0.142499	8	0.533836
Trial 1	F1	P	F	0:02:49.442-0:02:49.708	BL	0.124025	8	0.464628		Trial 1	F5	UP	F	0:02:49.442-0:02:49.708	BL	0.0336737	8	0.12615
Trial 1	F1	P	F	0:02:49.708-0:02:49.974	BL	0.228034	8	0.854284		Trial 1	F5	UP	F	0:02:49.708-0:02:49.974	BL	0.0410887	8	0.153929
Trial 1	F1	P	F	0:02:49.974-0:02:50.240	BL	0.233322	8	0.874081		Trial 1	F5	UP	F	0:02:49.974-0:02:50.240	BL	0.0421188	8	0.157788
Trial 1	F1	P	F	0:02:50.240-0:02:50.506	BL	0.114792	8	0.430038		Trial 1	F5	UP	F	0:02:50.240-0:02:50.506	BL	0.0988674	8	0.37038
Trial 1	F1	P	F	0:02:50.506-0:02:50.772	BL	0.12509	8	0.468624		Trial 1	F5	UP	F	0:02:50.506-0:02:50.772	BL	0.91046	8	3.41082
Trial 1	F1	P	F	0:02:50.772-0:02:51.038	BL	0.0656099	8	0.24579		Trial 1	F5	UP	F	0:02:50.772-0:02:51.038	BL	0.646351	8	2.42139
Trial 1	F1	P	F	0:02:51.038-0:02:51.304	BL	0.116831	7	0.500202		Trial 1	F5	UP	F	0:02:51.038-0:02:51.304	BL	1.70797	7	7.31253
Trial 1	F1	P	F	0:02:51.304-0:02:51.570	BL	0.358967	8	1.34479		Trial 1	F5	UP	F	0:02:51.304-0:02:51.570	BL	1.42885	8	5.35286
Trial 1	F1	P	F	0:02:51.570-0:02:51.836	BL	1.55543	8	5.82706		Trial 1	F5	UP	F	0:02:51.570-0:02:51.836	BL	1.76405	8	6.60855
Trial 1	F1	P	F	0:02:51.836-0:02:52.102	BL	0.841341	8	3.15189		Trial 1	F5	UP	F	0:02:51.836-0:02:52.102	BL	2.5435	8	9.52858
Trial 1	F1	P	F	0:02:52.102-0:02:52.368	BL	1.59982	8	5.99333		Trial 1	F5	UP	F	0:02:52.102-0:02:52.368	BL	0.690646	8	2.58733
Trial 1	F1	P	F	0:02:52.368-0:02:52.634	BL	2.31209	8	8.66167		Trial 1	F5	UP	F	0:02:52.368-0:02:52.634	BL	0.186645	8	0.699216
Trial 1	F1	P	F	0:02:52.634-0:02:52.900	BL	2.74066	8	10.2672		Trial 1	F5	UP	F	0:02:52.634-0:02:52.900	BL	0.279996	8	1.04894
Trial 1	F1	P	F	0:02:52.900-0:02:53.166	BL	1.72525	8	6.46318		Trial 1	F5	UP	F	0:02:52.900-0:02:53.166	BL	0.267206	8	1.00102
Trial 1	F1	P	F	0:02:53.166-0:02:53.432	BL	4.53305	8	16.982		Trial 1	F5	UP	F	0:02:53.166-0:02:53.432	BL	0.468438	8	1.75489
Trial 1	F1	P	F	0:02:53.432-0:02:53.698	BL	1.73203	8	6.48859		Trial 1	F5	UP	F	0:02:53.432-0:02:53.698	BL	1.50769	8	5.64818
Trial 1	F1	P	F	0:02:53.698-0:02:53.964	BL	2.08829	8	7.82324		Trial 1	F5	UP	F	0:02:53.698-0:02:53.964	BL	4.16881	8	15.6174
Trial 1	F1	P	F	0:02:53.964-0:02:54.230	BL	3.05126	8	11.4308		Trial 1	F5	UP	F	0:02:53.964-0:02:54.230	BL	4.21127	8	15.7765
Trial 1	F1	P	F	0:02:54.230-0:02:54.496	BL	2.4944	8	9.34464		Trial 1	F5	UP	F	0:02:54.230-0:02:54.496	BL	0.748191	8	2.8029
Trial 1	F1	P	F	0:02:54.496-0:02:54.762	BL	4.80152	8	17.9878		Trial 1	F5	UP	F	0:02:54.496-0:02:54.762	BL	0.157612	8	0.590451
Trial 1	F1	P	F	0:02:54.762-0:02:55.028	BL	2.78742	8	10.4423		Trial 1	F5	UP	F	0:02:54.762-0:02:55.028	BL	0.552366	8	2.0693
Trial 1	F1	P	F	0:02:55.028-0:02:55.294	BL	4.12382	8	15.4488		Trial 1	F5	UP	F	0:02:55.028-0:02:55.294	BL	0.56374	8	2.11191
Trial 1	F1	P	F	0:02:55.294-0:02:55.560	BL	2.96567	8	11.1102		Trial 1	F5	UP	F	0:02:55.294-0:02:55.560	BL	0.49093	8	1.83915
Trial 1	F1	P	F	0:02:55.560-0:02:55.826	BL	0.577305	8	2.16272		Trial 1	F5	UP	F	0:02:55.560-0:02:55.826	BL	0.3289	8	1.23214
Trial 1	F1	P	F	0:02:55.826-0:02:56.092	BL	0.590368	8	2.21166		Trial 1	F5	UP	F	0:02:55.826-0:02:56.092	BL	0.786682	8	2.94712
Trial 1	F1	P	F	0:02:56.092-0:02:56.358	BL	0.550722	8	2.06314		Trial 1	F5	UP	F	0:02:56.092-0:02:56.358	BL	0.670115	8	2.51042
Trial 1	F1	P	F	0:02:56.358-0:02:56.624	BL	0.503415	8	1.88592		Trial 1	F5	UP	F	0:02:56.358-0:02:56.624	BL	0.769807	8	2.88389
Trial 1	F1	P	F	0:02:56.624-0:02:56.890	BL	0.280464	8	1.05069		Trial 1	F5	UP	F	0:02:56.624-0:02:56.890	BL	0.453986	8	1.70075
Trial 1	F1	P	F	0:02:56.890-0:02:57.156	BL	0.400303	8	1.49963		Trial 1	F5	UP	F	0:02:56.890-0:02:57.156	BL	0.241271	8	0.90386
Trial 1	F1	P	F	0:02:57.156-0:02:57.422	BL	0.489285	8	1.83299		Trial 1	F5	UP	F	0:02:57.156-0:02:57.422	BL	0.645216	8	2.41714
Trial 1	F1	P	F	0:02:57.422-0:02:57.688	BL	0.517224	8	1.93765		Trial 1	F5	UP	F	0:02:57.422-0:02:57.688	BL	0.451433	8	1.69119
Trial 1	F1	P	F	0:02:57.688-0:02:57.954	BL	0.828508	8	3.1038		Trial 1	F5	UP	F	0:02:57.688-0:02:57.954	BL	0.461077	8	1.7273
Trial 1	F1	P	F	0:02:57.954-0:02:58.220	BL	0.572048	8	2.14304		Trial 1	F5	UP	F	0:02:57.954-0:02:58.220	BL	1.77022	8	6.6317
Trial 1	F1	P	F	0:02:58.220-0:02:58.486	BL	0.321784	8	1.20548		Trial 1	F5	UP	F	0:02:58.220-0:02:58.486	BL	0.595591	8	2.23122
Trial 1	F1	P	F	0:02:58.486-0:02:58.752	BL	0.539125	8	2.01971		Trial 1	F5	UP	F	0:02:58.486-0:02:58.752	BL	0.763771	8	2.86129
Trial 1	F1	P	F	0:02:58.752-0:02:59.018	BL	0.358994	8	1.34489		Trial 1	F5	UP	F	0:02:58.752-0:02:59.018	BL	0.468875	8	1.75652
Trial 1	F1	P	F	0:02:59.018-0:02:59.284	BL	1.2928	8	4.84317		Trial 1	F5	UP	F	0:02:59.018-0:02:59.284	BL	0.343113	8	1.28538
Trial 1	F1	P	F	0:02:59.284-0:02:59.550	BL	1.05028	8	3.93464		Trial 1	F5	UP	F	0:02:59.284-0:02:59.550	BL	0.874153	8	3.2748
Trial 1	F1	P	F	0:02:59.550-0:02:59.816	BL	0.931279	8	3.48879		Trial 1	F5	UP	F	0:02:59.550-0:02:59.816	BL	2.18559	8	8.18775
Trial 1	F1	P	F	0:02:59.816-0:03:00.082	BL	0.730511	8	2.73668		Trial 1	F5	UP	F	0:02:59.816-0:03:00.082	BL	3.01159	8	11.2822
Trial 1	F1	P	F	0:03:00.082-0:03:00.348	CS1a	0.682476	8	2.55672		Trial 1	F5	UP	F	0:03:00.082-0:03:00.348	CS1a	5.14955	8	19.2915
Trial 1	F1	P	F	0:03:00.348-0:03:00.614	CS1a	0.692823	8	2.59549		Trial 1	F5	UP	F	0:03:00.348-0:03:00.614	CS1a	1.60029	8	5.9951
Trial 1	F1	P	F	0:03:00.614-0:03:00.880	CS1a	0.223518	7	0.956975		Trial 1	F5	UP	F	0:03:00.614-0:03:00.880	CS1a	1.01926	7	4.3639
Trial 1	F1	P	F	0:03:00.880-0:03:01.146	CS1a	1.39996	8	5.2446		Trial 1	F5	UP	F	0:03:00.880-0:03:01.146	CS1a	1.50675	8	5.64466
Trial 1	F1	P	F	0:03:01.146-0:03:01.412	CS1a	4.90656	8	18.3812		Trial 1	F5	UP	F	0:03:01.146-0:03:01.412	CS1a	1.92964	8	7.22893
Trial 1	F1	P	F	0:03:01.412-0:03:01.678	CS1a	4.50791	8	16.8878		Trial 1	F5	UP	F	0:03:01.412-0:03:01.678	CS1a	1.73668	8	6.50607
Trial 1	F1	P	F	0:03:01.678-0:03:01.944	CS1a	4.53828	8	17.0015		Trial 1	F5	UP	F	0:03:01.678-0:03:01.944	CS1a	3.44989	8	12.9241
Trial 1	F1	P	F	0:03:01.944-0:03:02.210	CS1a	1.53506	8	5.75069		Trial 1	F5	UP	F	0:03:01.944-0:03:02.210	CS1a	2.64613	8	9.91306
Trial 1	F1	P	F	0:03:02.210-0:03:02.476	CS1a	1.78008	8	6.66866		Trial 1	F5	UP	F	0:03:02.210-0:03:02.476	CS1a	0.370624	8	1.38846
Trial 1	F1	P	F	0:03:02.476-0:03:02.742	CS1a	0.696825	8	2.61048		Trial 1	F5	UP	F	0:03:02.476-0:03:02.742	CS1a	0.590806	8	2.2133
Trial 1	F1	P	F	0:03:02.742-0:03:03.008	CS1a	2.02115	8	7.57172		Trial 1	F5	UP	F	0:03:02.742-0:03:03.008	CS1a	2.07503	8	7.77359
Trial 1	F1	P	F	0:03:03.008-0:03:03.274	CS1a	0.679483	8	2.54551		Trial 1	F5	UP	F	0:03:03.008-0:03:03.274	CS1a	1.90774	8	7.14687
Trial 1	F1	P	F	0:03:03.274-0:03:03.540	CS1a	0.582508	8	2.18221		Trial 1	F5	UP	F	0:03:03.274-0:03:03.540	CS1a	0.997582	8	3.73721
Trial 1	F1	P	F	0:03:03.540-0:03:03.806	CS1a	0.410907	8	1.53936		Trial 1	F5	UP	F	0:03:03.540-0:03:03.806	CS1a	0.261103	8	0.978163
Trial 1	F1	P	F	0:03:03.806-0:03:04.072	CS1a	0.574684	8	2.1529		Trial 1	F5	UP	F	0:03:03.806-0:03:04.072	CS1a	0.116526	8	0.436535
Trial 1	F1	P	F	0:03:04.072-0:03:04.338	CS1a	0.368319	8	1.37982		Trial 1	F5	UP	F	0:03:04.072-0:03:04.338	CS1a	0.138151	8	0.517549
Trial 1	F1	P	F	0:03:04.338-0:03:04.604	CS1a	0.235101	8	0.880746		Trial 1	F5	UP	F	0:03:04.338-0:03:04.604	CS1a	0.293627	8	1.1
Trial 1	F1	P	F	0:03:04.604-0:03:04.870	CS1a	0.226885	8	0.849963		Trial 1	F5	UP	F	0:03:04.604-0:03:04.870	CS1a	0.295298	8	1.10626
Trial 1	F1	P	F	0:03:04.870-0:03:05.136	CS1a	0.484349	8	1.81449		Trial 1	F5	UP	F	0:03:04.870-0:03:05.136	CS1a	0.331466	8	1.24177
Trial 1	F1	P	F	0:03:05.136-0:03:05.402	CS1a	1.69407	8	6.3464		Trial 1	F5	UP	F	0:03:05.136-0:03:05.402	CS1a	0.309551	8	1.15966
Trial 1	F1	P	F	0:03:05.402-0:03:05.668	CS1a	1.47752	8	5.53519		Trial 1	F5	UP	F	0:03:05.402-0:03:05.668	CS1a	0.841489	8	3.15244
Trial 1	F1	P	F	0:03:05.668-0:03:05.934	CS1a	0.703867	8	2.63686		Trial 1	F5	UP	F	0:03:05.668-0:03:05.934	CS1a	0.605334	8	2.26773
Trial 1	F1	P	F	0:03:05.934-0:03:06.200	CS1a	0.78187	8	2.92908		Trial 1	F5	UP	F	0:03:05.934-0:03:06.200	CS1a	0.997843	8	3.73815
Trial 1	F1	P	F	0:03:06.200-0:03:06.466	CS1a	2.68841	8	10.0715		Trial 1	F5	UP	F	0:03:06.200-0:03:06.466	CS1a	0.49411	8	1.85106
Trial 1	F1	P	F	0:03:06.466-0:03:06.732	CS1a	1.50282	8	5.62993		Trial 1	F5	UP	F	0:03:06.466-0:03:06.732	CS1a	0.821386	8	3.07711
Trial 1	F1	P	F	0:03:06.732-0:03:06.998	CS1a	1.8437	8	6.90699		Trial 1	F5	UP	F	0:03:06.732-0:03:06.998	CS1a	0.427528	8	1.60163
Trial 1	F1	P	F	0:03:06.998-0:03:07.264	CS1a	0.576159	8	2.15843		Trial 1	F5	UP	F	0:03:06.998-0:03:07.264	CS1a	1.05613	8	3.95651
Trial 1	F1	P	F	0:03:07.264-0:03:07.530	CS1a	0.717276	8	2.6871		Trial 1	F5	UP	F	0:03:07.264-0:03:07.530	CS1a	1.91773	8	7.1843
Trial 1	F1	P	F	0:03:07.530-0:03:07.796	CS1a	0.27879	8	1.04442		Trial 1	F5	UP	F	0:03:07.530-0:03:07.796	CS1a	0.471569	8	1.76663
Trial 1	F1	P	F	0:03:07.796-0:03:08.062	CS1a	0.209691	8	0.785556		Trial 1	F5	UP	F	0:03:07.796-0:03:08.062	CS1a	0.408857	8	1.53167
Trial 1	F1	P	F	0:03:08.062-0:03:08.328	CS1a	0.0966681	8	0.362145		Trial 1	F5	UP	F	0:03:08.062-0:03:08.328	CS1a	1.25653	8	4.7073
Trial 1	F1	P	F	0:03:08.328-0:03:08.594	CS1a	0.724712	8	2.71495		Trial 1	F5	UP	F	0:03:08.328-0:03:08.594	CS1a	0.496835	8	1.86126
Trial 1	F1	P	F	0:03:08.594-0:03:08.860	CS1a	2.55139	8	9.55812		Trial 1	F5	UP	F	0:03:08.594-0:03:08.860	CS1a	0.343244	8	1.28589
Trial 1	F1	P	F	0:03:08.860-0:03:09.126	CS1a	0.72024	8	2.69821		Trial 1	F5	UP	F	0:03:08.860-0:03:09.126	CS1a	0.246553	8	0.923653
Trial 1	F1	P	F	0:03:09.126-0:03:09.392	CS1a	0.569786	8	2.13456		Trial 1	F5	UP	F	0:03:09.126-0:03:09.392	CS1a	0.329298	8	1.23363
Trial 1	F1	P	F	0:03:09.392-0:03:09.658	CS1a	0.298687	8	1.11896		Trial 1	F5	UP	F	0:03:09.392-0:03:09.658	CS1a	0.235602	8	0.882628
Trial 1	F1	P	F	0:03:09.658-0:03:09.924	CS1a	0.571351	8	2.14041		Trial 1	F5	UP	F	0:03:09.658-0:03:09.924	CS1a	0.151797	8	0.568667
Trial 1	F1	P	F	0:03:09.924-0:03:10.190	CS1a	0.166379	7	0.712341		Trial 1	F5	UP	F	0:03:09.924-0:03:10.190	CS1a	0.0616732	7	0.26405
Trial 1	F1	P	F	0:03:10.190-0:03:10.456	IT1	6.70059	8	25.1022		Trial 1	F5	UP	F	0:03:10.190-0:03:10.456	IT1	0.0883129	8	0.330844
Trial 1	F1	P	F	0:03:10.456-0:03:10.722	IT1	13.3424	8	49.984		Trial 1	F5	UP	F	0:03:10.456-0:03:10.722	IT1	0.178759	8	0.669676
Trial 1	F1	P	F	0:03:10.722-0:03:10.988	IT1	6.95944	8	26.0717		Trial 1	F5	UP	F	0:03:10.722-0:03:10.988	IT1	0.34436	8	1.29005
Trial 1	F1	P	F	0:03:10.988-0:03:11.254	IT1	16.0134	8	59.9903		Trial 1	F5	UP	F	0:03:10.988-0:03:11.254	IT1	0.855675	8	3.20558
Trial 1	F1	P	F	0:03:11.254-0:03:11.520	IT1	9.26126	8	34.6949		Trial 1	F5	UP	F	0:03:11.254-0:03:11.520	IT1	0.376347	8	1.40989
Trial 1	F1	P	F	0:03:11.520-0:03:11.786	IT1	3.30123	8	12.3673		Trial 1	F5	UP	F	0:03:11.520-0:03:11.786	IT1	0.190816	8	0.714849
Trial 1	F1	P	F	0:03:11.786-0:03:12.052	IT1	4.02955	8	15.0956		Trial 1	F5	UP	F	0:03:11.786-0:03:12.052	IT1	0.134924	8	0.505462
Trial 1	F1	P	F	0:03:12.052-0:03:12.318	IT1	1.27963	8	4.79384		Trial 1	F5	UP	F	0:03:12.052-0:03:12.318	IT1	0.257416	8	0.964348
Trial 1	F1	P	F	0:03:12.318-0:03:12.584	IT1	1.35687	8	5.08318		Trial 1	F5	UP	F	0:03:12.318-0:03:12.584	IT1	0.148921	8	0.557898
Trial 1	F1	P	F	0:03:12.584-0:03:12.850	IT1	1.20223	8	4.50383		Trial 1	F5	UP	F	0:03:12.584-0:03:12.850	IT1	0.1376	8	0.515483
Trial 1	F1	P	F	0:03:12.850-0:03:13.116	IT1	0.648411	8	2.4291		Trial 1	F5	UP	F	0:03:12.850-0:03:13.116	IT1	0.136347	8	0.510792
Trial 1	F1	P	F	0:03:13.116-0:03:13.382	IT1	0.749952	8	2.80949		Trial 1	F5	UP	F	0:03:13.116-0:03:13.382	IT1	0.0754007	8	0.282468
Trial 1	F1	P	F	0:03:13.382-0:03:13.648	IT1	0.463944	8	1.73804		Trial 1	F5	UP	F	0:03:13.382-0:03:13.648	IT1	0.184286	8	0.690383
Trial 1	F1	P	F	0:03:13.648-0:03:13.914	IT1	2.6534	8	9.94032		Trial 1	F5	UP	F	0:03:13.648-0:03:13.914	IT1	0.212852	8	0.7974
Trial 1	F1	P	F	0:03:13.914-0:03:14.180	IT1	3.34828	8	12.5435		Trial 1	F5	UP	F	0:03:13.914-0:03:14.180	IT1	0.400547	8	1.50055
Trial 1	F1	P	F	0:03:14.180-0:03:14.446	IT1	1.79819	8	6.73649		Trial 1	F5	UP	F	0:03:14.180-0:03:14.446	IT1	0.265255	8	0.993711
Trial 1	F1	P	F	0:03:14.446-0:03:14.712	IT1	3.54302	8	13.2731		Trial 1	F5	UP	F	0:03:14.446-0:03:14.712	IT1	0.320053	8	1.19899
Trial 1	F1	P	F	0:03:14.712-0:03:14.978	IT1	3.83091	8	14.3515		Trial 1	F5	UP	F	0:03:14.712-0:03:14.978	IT1	0.19098	8	0.715459
Trial 1	F1	P	F	0:03:14.978-0:03:15.244	IT1	1.13747	8	4.26126		Trial 1	F5	UP	F	0:03:14.978-0:03:15.244	IT1	0.179433	8	0.672202
Trial 1	F1	P	F	0:03:15.244-0:03:15.510	IT1	0.379562	8	1.42193		Trial 1	F5	UP	F	0:03:15.244-0:03:15.510	IT1	0.305047	8	1.14278
Trial 1	F1	P	F	0:03:15.510-0:03:15.776	IT1	1.00933	8	3.78122		Trial 1	F5	UP	F	0:03:15.510-0:03:15.776	IT1	0.158479	8	0.593703
Trial 1	F1	P	F	0:03:15.776-0:03:16.042	IT1	1.28668	8	4.8202		Trial 1	F5	UP	F	0:03:15.776-0:03:16.042	IT1	0.257742	8	0.965563
Trial 1	F1	P	F	0:03:16.042-0:03:16.308	IT1	0.632236	8	2.36851		Trial 1	F5	UP	F	0:03:16.042-0:03:16.308	IT1	0.164803	8	0.61739
Trial 1	F1	P	F	0:03:16.308-0:03:16.574	IT1	1.07549	8	4.02904		Trial 1	F5	UP	F	0:03:16.308-0:03:16.574	IT1	0.158584	8	0.594093
Trial 1	F1	P	F	0:03:16.574-0:03:16.840	IT1	2.83494	8	10.6204		Trial 1	F5	UP	F	0:03:16.574-0:03:16.840	IT1	0.148383	8	0.555884
Trial 1	F1	P	F	0:03:16.840-0:03:17.106	IT1	1.47023	8	5.50786		Trial 1	F5	UP	F	0:03:16.840-0:03:17.106	IT1	0.251016	8	0.940371
Trial 1	F1	P	F	0:03:17.106-0:03:17.372	IT1	1.45154	8	5.43783		Trial 1	F5	UP	F	0:03:17.106-0:03:17.372	IT1	0.494049	8	1.85083
Trial 1	F1	P	F	0:03:17.372-0:03:17.638	IT1	0.388783	8	1.45647		Trial 1	F5	UP	F	0:03:17.372-0:03:17.638	IT1	0.157707	8	0.59081
Trial 1	F1	P	F	0:03:17.638-0:03:17.904	IT1	0.165459	8	0.619857		Trial 1	F5	UP	F	0:03:17.638-0:03:17.904	IT1	0.207349	8	0.776784
Trial 1	F1	P	F	0:03:17.904-0:03:18.170	IT1	1.41984	8	5.31908		Trial 1	F5	UP	F	0:03:17.904-0:03:18.170	IT1	0.280892	8	1.05229
Trial 1	F1	P	F	0:03:18.170-0:03:18.436	IT1	1.11646	8	4.18255		Trial 1	F5	UP	F	0:03:18.170-0:03:18.436	IT1	0.439568	8	1.64673
Trial 1	F1	P	F	0:03:18.436-0:03:18.702	IT1	0.63115	8	2.36444		Trial 1	F5	UP	F	0:03:18.436-0:03:18.702	IT1	0.712504	8	2.66922
Trial 1	F1	P	F	0:03:18.702-0:03:18.968	IT1	1.19113	8	4.46227		Trial 1	F5	UP	F	0:03:18.702-0:03:18.968	IT1	2.37884	8	8.91173
Trial 1	F1	P	F	0:03:18.968-0:03:19.234	IT1	0.554624	8	2.07777		Trial 1	F5	UP	F	0:03:18.968-0:03:19.234	IT1	1.02641	8	3.84521
Trial 1	F1	P	F	0:03:19.234-0:03:19.500	IT1	0.868419	8	3.25331		Trial 1	F5	UP	F	0:03:19.234-0:03:19.500	IT1	1.3955	8	5.2279
Trial 1	F1	P	F	0:03:19.500-0:03:19.766	IT1	0.817756	7	3.50117		Trial 1	F5	UP	F	0:03:19.500-0:03:19.766	IT1	2.59521	7	11.1112
Trial 1	F1	P	F	0:03:19.766-0:03:20.032	IT1	0.77769	8	2.91342		Trial 1	F5	UP	F	0:03:19.766-0:03:20.032	IT1	1.3384	8	5.01399
Trial 1	F1	P	F	0:03:20.032-0:03:20.298	IT1	1.54953	8	5.8049		Trial 1	F5	UP	F	0:03:20.032-0:03:20.298	IT1	1.38659	8	5.19448
Trial 1	F1	P	F	0:03:20.298-0:03:20.564	IT1	0.628684	8	2.35521		Trial 1	F5	UP	F	0:03:20.298-0:03:20.564	IT1	0.693108	8	2.59655
Trial 1	F1	P	F	0:03:20.564-0:03:20.830	IT1	0.303403	8	1.13662		Trial 1	F5	UP	F	0:03:20.564-0:03:20.830	IT1	1.57547	8	5.90213
Trial 1	F1	P	F	0:03:20.830-0:03:21.096	IT1	0.134601	8	0.504245		Trial 1	F5	UP	F	0:03:20.830-0:03:21.096	IT1	0.850136	8	3.18481
Trial 1	F1	P	F	0:03:21.096-0:03:21.362	IT1	0.434076	8	1.62616		Trial 1	F5	UP	F	0:03:21.096-0:03:21.362	IT1	0.734777	8	2.75267
Trial 1	F1	P	F	0:03:21.362-0:03:21.628	IT1	1.0771	8	4.03509		Trial 1	F5	UP	F	0:03:21.362-0:03:21.628	IT1	0.929743	8	3.48303
Trial 1	F1	P	F	0:03:21.628-0:03:21.894	IT1	0.793089	8	2.9711		Trial 1	F5	UP	F	0:03:21.628-0:03:21.894	IT1	0.646137	8	2.42059
Trial 1	F1	P	F	0:03:21.894-0:03:22.160	IT1	0.516594	8	1.93529		Trial 1	F5	UP	F	0:03:21.894-0:03:22.160	IT1	2.20789	8	8.27129
Trial 1	F1	P	F	0:03:22.160-0:03:22.426	IT1	0.790061	8	2.95975		Trial 1	F5	UP	F	0:03:22.160-0:03:22.426	IT1	2.33289	8	8.73961
Trial 1	F1	P	F	0:03:22.426-0:03:22.692	IT1	1.29517	8	4.85204		Trial 1	F5	UP	F	0:03:22.426-0:03:22.692	IT1	1.78404	8	6.68348
Trial 1	F1	P	F	0:03:22.692-0:03:22.958	IT1	1.51056	8	5.65894		Trial 1	F5	UP	F	0:03:22.692-0:03:22.958	IT1	0.321959	8	1.20614
Trial 1	F1	P	F	0:03:22.958-0:03:23.224	IT1	1.41394	8	5.29694		Trial 1	F5	UP	F	0:03:22.958-0:03:23.224	IT1	0.186927	8	0.700278
Trial 1	F1	P	F	0:03:23.224-0:03:23.490	IT1	4.16829	8	15.6155		Trial 1	F5	UP	F	0:03:23.224-0:03:23.490	IT1	0.264214	8	0.989812
Trial 1	F1	P	F	0:03:23.490-0:03:23.756	IT1	4.32107	8	16.1878		Trial 1	F5	UP	F	0:03:23.490-0:03:23.756	IT1	0.653948	8	2.44985
Trial 1	F1	P	F	0:03:23.756-0:03:24.022	IT1	3.77585	8	14.1453		Trial 1	F5	UP	F	0:03:23.756-0:03:24.022	IT1	1.65738	8	6.20895
Trial 1	F1	P	F	0:03:24.022-0:03:24.288	IT1	0.823135	8	3.08366		Trial 1	F5	UP	F	0:03:24.022-0:03:24.288	IT1	5.31029	8	19.8935
Trial 1	F1	P	F	0:03:24.288-0:03:24.554	IT1	0.806643	8	3.02187		Trial 1	F5	UP	F	0:03:24.288-0:03:24.554	IT1	3.62891	8	13.5949
Trial 1	F1	P	F	0:03:24.554-0:03:24.820	IT1	1.59644	8	5.98071		Trial 1	F5	UP	F	0:03:24.554-0:03:24.820	IT1	0.683967	8	2.56232
Trial 1	F1	P	F	0:03:24.820-0:03:25.086	IT1	0.750653	8	2.81213		Trial 1	F5	UP	F	0:03:24.820-0:03:25.086	IT1	0.868181	8	3.25241
Trial 1	F1	P	F	0:03:25.086-0:03:25.352	IT1	0.185039	8	0.693206		Trial 1	F5	UP	F	0:03:25.086-0:03:25.352	IT1	2.22252	8	8.32618
Trial 1	F1	P	F	0:03:25.352-0:03:25.618	IT1	0.177212	8	0.663876		Trial 1	F5	UP	F	0:03:25.352-0:03:25.618	IT1	1.44792	8	5.4243
Trial 1	F1	P	F	0:03:25.618-0:03:25.884	IT1	1.04252	8	3.90556		Trial 1	F5	UP	F	0:03:25.618-0:03:25.884	IT1	4.84389	8	18.1463
Trial 1	F1	P	F	0:03:25.884-0:03:26.150	IT1	0.892405	8	3.34317		Trial 1	F5	UP	F	0:03:25.884-0:03:26.150	IT1	4.80248	8	17.9912
Trial 1	F1	P	F	0:03:26.150-0:03:26.416	IT1	0.636305	8	2.38375		Trial 1	F5	UP	F	0:03:26.150-0:03:26.416	IT1	0.943813	8	3.53575
Trial 1	F1	P	F	0:03:26.416-0:03:26.682	IT1	0.367393	8	1.37636		Trial 1	F5	UP	F	0:03:26.416-0:03:26.682	IT1	0.579969	8	2.17271
Trial 1	F1	P	F	0:03:26.682-0:03:26.948	IT1	0.157934	8	0.591661		Trial 1	F5	UP	F	0:03:26.682-0:03:26.948	IT1	1.75866	8	6.58841
Trial 1	F1	P	F	0:03:26.948-0:03:27.214	IT1	0.51469	8	1.92815		Trial 1	F5	UP	F	0:03:26.948-0:03:27.214	IT1	0.7273	8	2.72465
Trial 1	F1	P	F	0:03:27.214-0:03:27.480	IT1	1.24764	8	4.674		Trial 1	F5	UP	F	0:03:27.214-0:03:27.480	IT1	1.03323	8	3.87078
Trial 1	F1	P	F	0:03:27.480-0:03:27.746	IT1	2.09665	8	7.8546		Trial 1	F5	UP	F	0:03:27.480-0:03:27.746	IT1	0.796325	8	2.98322
Trial 1	F1	P	F	0:03:27.746-0:03:28.012	IT1	1.87841	8	7.03697		Trial 1	F5	UP	F	0:03:27.746-0:03:28.012	IT1	0.300246	8	1.1248
Trial 1	F1	P	F	0:03:28.012-0:03:28.278	IT1	1.06269	8	3.98107		Trial 1	F5	UP	F	0:03:28.012-0:03:28.278	IT1	0.456149	8	1.70885
Trial 1	F1	P	F	0:03:28.278-0:03:28.544	IT1	1.32551	8	4.9657		Trial 1	F5	UP	F	0:03:28.278-0:03:28.544	IT1	0.655669	8	2.4563
Trial 1	F1	P	F	0:03:28.544-0:03:28.810	IT1	0.502631	8	1.88298		Trial 1	F5	UP	F	0:03:28.544-0:03:28.810	IT1	0.74307	8	2.78373
Trial 1	F1	P	F	0:03:28.810-0:03:29.076	IT1	0.551659	8	2.06665		Trial 1	F5	UP	F	0:03:28.810-0:03:29.076	IT1	0.454827	8	1.7039
Trial 1	F1	P	F	0:03:29.076-0:03:29.342	IT1	0.486275	7	2.08195		Trial 1	F5	UP	F	0:03:29.076-0:03:29.342	IT1	0.138776	7	0.594158
Trial 1	F1	P	F	0:03:29.342-0:03:29.608	IT1	0.528785	8	1.98096		Trial 1	F5	UP	F	0:03:29.342-0:03:29.608	IT1	0.320386	8	1.20025
Trial 1	F1	P	F	0:03:29.608-0:03:29.874	IT1	0.759186	8	2.84409		Trial 1	F5	UP	F	0:03:29.608-0:03:29.874	IT1	1.29226	8	4.84114
Trial 1	F1	P	F	0:03:29.874-0:03:30.140	IT1	0.615025	8	2.30405		Trial 1	F5	UP	F	0:03:29.874-0:03:30.140	IT1	1.34405	8	5.03517
Trial 1	F1	P	F	0:03:30.140-0:03:30.406	IT1	0.326223	8	1.22211		Trial 1	F5	UP	F	0:03:30.140-0:03:30.406	IT1	1.41905	8	5.31614
Trial 1	F1	P	F	0:03:30.406-0:03:30.672	IT1	0.619011	8	2.31897		Trial 1	F5	UP	F	0:03:30.406-0:03:30.672	IT1	1.15936	8	4.34325
Trial 1	F1	P	F	0:03:30.672-0:03:30.938	IT1	0.717243	8	2.68698		Trial 1	F5	UP	F	0:03:30.672-0:03:30.938	IT1	1.59222	8	5.96487
Trial 1	F1	P	F	0:03:30.938-0:03:31.204	IT1	0.56736	8	2.12546		Trial 1	F5	UP	F	0:03:30.938-0:03:31.204	IT1	2.21859	8	8.31135
Trial 1	F1	P	F	0:03:31.204-0:03:31.470	IT1	0.788777	8	2.95497		Trial 1	F5	UP	F	0:03:31.204-0:03:31.470	IT1	3.95415	8	14.8133
Trial 1	F1	P	F	0:03:31.470-0:03:31.736	IT1	1.33746	8	5.01045		Trial 1	F5	UP	F	0:03:31.470-0:03:31.736	IT1	1.84677	8	6.91846
Trial 1	F1	P	F	0:03:31.736-0:03:32.002	IT1	2.10334	8	7.87962		Trial 1	F5	UP	F	0:03:31.736-0:03:32.002	IT1	3.05627	8	11.4495
Trial 1	F1	P	F	0:03:32.002-0:03:32.268	IT1	2.72537	8	10.21		Trial 1	F5	UP	F	0:03:32.002-0:03:32.268	IT1	2.17879	8	8.16232
Trial 1	F1	P	F	0:03:32.268-0:03:32.534	IT1	0.869256	8	3.25645		Trial 1	F5	UP	F	0:03:32.268-0:03:32.534	IT1	1.2046	8	4.51271
Trial 1	F1	P	F	0:03:32.534-0:03:32.800	IT1	0.529811	8	1.98481		Trial 1	F5	UP	F	0:03:32.534-0:03:32.800	IT1	2.29149	8	8.5845
Trial 1	F1	P	F	0:03:32.800-0:03:33.066	IT1	0.693838	8	2.59929		Trial 1	F5	UP	F	0:03:32.800-0:03:33.066	IT1	3.07703	8	11.5273
Trial 1	F1	P	F	0:03:33.066-0:03:33.332	IT1	1.29382	8	4.84696		Trial 1	F5	UP	F	0:03:33.066-0:03:33.332	IT1	0.811703	8	3.04084
Trial 1	F1	P	F	0:03:33.332-0:03:33.598	IT1	0.833551	8	3.1227		Trial 1	F5	UP	F	0:03:33.332-0:03:33.598	IT1	0.394385	8	1.47748
Trial 1	F1	P	F	0:03:33.598-0:03:33.864	IT1	0.930216	8	3.48482		Trial 1	F5	UP	F	0:03:33.598-0:03:33.864	IT1	1.11763	8	4.18693
Trial 1	F1	P	F	0:03:33.864-0:03:34.130	IT1	0.481258	8	1.80292		Trial 1	F5	UP	F	0:03:33.864-0:03:34.130	IT1	1.16669	8	4.37075
Trial 1	F1	P	F	0:03:34.130-0:03:34.396	IT1	0.822265	8	3.08041		Trial 1	F5	UP	F	0:03:34.130-0:03:34.396	IT1	2.04427	8	7.65831
Trial 1	F1	P	F	0:03:34.396-0:03:34.662	IT1	1.01691	8	3.80958		Trial 1	F5	UP	F	0:03:34.396-0:03:34.662	IT1	1.0795	8	4.04407
Trial 1	F1	P	F	0:03:34.662-0:03:34.928	IT1	1.44592	8	5.41679		Trial 1	F5	UP	F	0:03:34.662-0:03:34.928	IT1	0.820473	8	3.07372
Trial 1	F1	P	F	0:03:34.928-0:03:35.194	IT1	1.5197	8	5.69318		Trial 1	F5	UP	F	0:03:34.928-0:03:35.194	IT1	3.54532	8	13.2816
Trial 1	F1	P	F	0:03:35.194-0:03:35.460	IT1	2.32377	8	8.70545		Trial 1	F5	UP	F	0:03:35.194-0:03:35.460	IT1	1.1058	8	4.1426
Trial 1	F1	P	F	0:03:35.460-0:03:35.726	IT1	1.41329	8	5.29454		Trial 1	F5	UP	F	0:03:35.460-0:03:35.726	IT1	0.940568	8	3.52359
Trial 1	F1	P	F	0:03:35.726-0:03:35.992	IT1	0.184352	8	0.690626		Trial 1	F5	UP	F	0:03:35.726-0:03:35.992	IT1	0.720717	8	2.69998
Trial 1	F1	P	F	0:03:35.992-0:03:36.258	IT1	1.04407	8	3.91134		Trial 1	F5	UP	F	0:03:35.992-0:03:36.258	IT1	1.51597	8	5.67922
Trial 1	F1	P	F	0:03:36.258-0:03:36.524	IT1	2.68158	8	10.0459		Trial 1	F5	UP	F	0:03:36.258-0:03:36.524	IT1	1.39395	8	5.22206
Trial 1	F1	P	F	0:03:36.524-0:03:36.790	IT1	1.94479	8	7.2857		Trial 1	F5	UP	F	0:03:36.524-0:03:36.790	IT1	2.6218	8	9.82199
Trial 1	F1	P	F	0:03:36.790-0:03:37.056	IT1	1.64592	8	6.16603		Trial 1	F5	UP	F	0:03:36.790-0:03:37.056	IT1	3.68563	8	13.8073
Trial 1	F1	P	F	0:03:37.056-0:03:37.322	IT1	1.06179	8	3.97772		Trial 1	F5	UP	F	0:03:37.056-0:03:37.322	IT1	0.503481	8	1.88616
Trial 1	F1	P	F	0:03:37.322-0:03:37.588	IT1	1.4607	8	5.47216		Trial 1	F5	UP	F	0:03:37.322-0:03:37.588	IT1	0.858376	8	3.21569
Trial 1	F1	P	F	0:03:37.588-0:03:37.854	IT1	0.86184	8	3.22866		Trial 1	F5	UP	F	0:03:37.588-0:03:37.854	IT1	0.337784	8	1.26542
Trial 1	F1	P	F	0:03:37.854-0:03:38.120	IT1	1.60921	8	6.02853		Trial 1	F5	UP	F	0:03:37.854-0:03:38.120	IT1	0.294611	8	1.10369
Trial 1	F1	P	F	0:03:38.120-0:03:38.386	IT1	1.02673	8	3.84639		Trial 1	F5	UP	F	0:03:38.120-0:03:38.386	IT1	0.928341	8	3.4778
Trial 1	F1	P	F	0:03:38.386-0:03:38.652	IT1	0.282326	8	1.05766		Trial 1	F5	UP	F	0:03:38.386-0:03:38.652	IT1	1.70696	8	6.3947
Trial 1	F1	P	F	0:03:38.652-0:03:38.918	IT1	0.531741	7	2.2766		Trial 1	F5	UP	F	0:03:38.652-0:03:38.918	IT1	1.42654	7	6.10765
Trial 1	F1	P	F	0:03:38.918-0:03:39.184	IT1	1.10571	8	4.14228		Trial 1	F5	UP	F	0:03:38.918-0:03:39.184	IT1	0.982707	8	3.68148
Trial 1	F1	P	F	0:03:39.184-0:03:39.450	IT1	0.361084	8	1.35271		Trial 1	F5	UP	F	0:03:39.184-0:03:39.450	IT1	0.411572	8	1.54185
Trial 1	F1	P	F	0:03:39.450-0:03:39.716	IT1	0.176217	8	0.660159		Trial 1	F5	UP	F	0:03:39.450-0:03:39.716	IT1	0.118298	8	0.443174
Trial 1	F1	P	F	0:03:39.716-0:03:39.982	IT1	0.162046	8	0.607064		Trial 1	F5	UP	F	0:03:39.716-0:03:39.982	IT1	1.81462	8	6.798
Trial 1	F1	P	F	0:03:39.982-0:03:40.248	IT1	0.134037	8	0.502135		Trial 1	F5	UP	F	0:03:39.982-0:03:40.248	IT1	0.959425	8	3.59424
Trial 1	F1	P	F	0:03:40.248-0:03:40.514	IT1	0.306165	8	1.14697		Trial 1	F5	UP	F	0:03:40.248-0:03:40.514	IT1	1.51413	8	5.67233
Trial 1	F1	P	F	0:03:40.514-0:03:40.780	IT1	0.545608	8	2.04398		Trial 1	F5	UP	F	0:03:40.514-0:03:40.780	IT1	2.071	8	7.75847
Trial 1	F1	P	F	0:03:40.780-0:03:41.046	IT1	1.14386	8	4.28519		Trial 1	F5	UP	F	0:03:40.780-0:03:41.046	IT1	2.05142	8	7.68514
Trial 1	F1	P	F	0:03:41.046-0:03:41.312	IT1	0.546529	8	2.04744		Trial 1	F5	UP	F	0:03:41.046-0:03:41.312	IT1	0.845644	8	3.16798
Trial 1	F1	P	F	0:03:41.312-0:03:41.578	IT1	0.289072	8	1.08293		Trial 1	F5	UP	F	0:03:41.312-0:03:41.578	IT1	0.527024	8	1.97435
Trial 1	F1	P	F	0:03:41.578-0:03:41.844	IT1	1.01276	8	3.79406		Trial 1	F5	UP	F	0:03:41.578-0:03:41.844	IT1	1.85493	8	6.94911
Trial 1	F1	P	F	0:03:41.844-0:03:42.110	IT1	1.82352	8	6.83136		Trial 1	F5	UP	F	0:03:41.844-0:03:42.110	IT1	2.28696	8	8.56751
Trial 1	F1	P	F	0:03:42.110-0:03:42.376	IT1	3.08684	8	11.5641		Trial 1	F5	UP	F	0:03:42.110-0:03:42.376	IT1	3.78064	8	14.1633
Trial 1	F1	P	F	0:03:42.376-0:03:42.642	IT1	2.74548	8	10.2852		Trial 1	F5	UP	F	0:03:42.376-0:03:42.642	IT1	3.51005	8	13.1495
Trial 1	F1	P	F	0:03:42.642-0:03:42.908	IT1	4.28461	8	16.0512		Trial 1	F5	UP	F	0:03:42.642-0:03:42.908	IT1	1.91781	8	7.18459
Trial 1	F1	P	F	0:03:42.908-0:03:43.174	IT1	3.27955	8	12.2861		Trial 1	F5	UP	F	0:03:42.908-0:03:43.174	IT1	3.22195	8	12.0702
Trial 1	F1	P	F	0:03:43.174-0:03:43.440	IT1	2.03261	8	7.61466		Trial 1	F5	UP	F	0:03:43.174-0:03:43.440	IT1	2.01511	8	7.54909
Trial 1	F1	P	F	0:03:43.440-0:03:43.706	IT1	2.23042	8	8.35571		Trial 1	F5	UP	F	0:03:43.440-0:03:43.706	IT1	2.41172	8	9.03494
Trial 1	F1	P	F	0:03:43.706-0:03:43.972	IT1	1.54951	8	5.80484		Trial 1	F5	UP	F	0:03:43.706-0:03:43.972	IT1	2.49008	8	9.32844
Trial 1	F1	P	F	0:03:43.972-0:03:44.238	IT1	0.781523	8	2.92777		Trial 1	F5	UP	F	0:03:43.972-0:03:44.238	IT1	2.59053	8	9.70477
Trial 1	F1	P	F	0:03:44.238-0:03:44.504	IT1	0.634351	8	2.37644		Trial 1	F5	UP	F	0:03:44.238-0:03:44.504	IT1	2.71117	8	10.1567
Trial 1	F1	P	F	0:03:44.504-0:03:44.770	IT1	0.555814	8	2.08221		Trial 1	F5	UP	F	0:03:44.504-0:03:44.770	IT1	3.2326	8	12.1101
Trial 1	F1	P	F	0:03:44.770-0:03:45.036	IT1	0.224737	8	0.841922		Trial 1	F5	UP	F	0:03:44.770-0:03:45.036	IT1	3.44815	8	12.9177
Trial 1	F1	P	F	0:03:45.036-0:03:45.302	IT1	0.360474	8	1.35042		Trial 1	F5	UP	F	0:03:45.036-0:03:45.302	IT1	1.21785	8	4.56236
Trial 1	F1	P	F	0:03:45.302-0:03:45.568	IT1	0.544192	8	2.03868		Trial 1	F5	UP	F	0:03:45.302-0:03:45.568	IT1	0.611183	8	2.28964
Trial 1	F1	P	F	0:03:45.568-0:03:45.834	IT1	0.733165	8	2.74662		Trial 1	F5	UP	F	0:03:45.568-0:03:45.834	IT1	0.535238	8	2.00513
Trial 1	F1	P	F	0:03:45.834-0:03:46.100	IT1	0.933749	8	3.49805		Trial 1	F5	UP	F	0:03:45.834-0:03:46.100	IT1	1.1278	8	4.22503
Trial 1	F1	P	F	0:03:46.100-0:03:46.366	IT1	1.48292	8	5.55539		Trial 1	F5	UP	F	0:03:46.100-0:03:46.366	IT1	1.20463	8	4.51285
Trial 1	F1	P	F	0:03:46.366-0:03:46.632	IT1	1.67244	8	6.26536		Trial 1	F5	UP	F	0:03:46.366-0:03:46.632	IT1	0.931565	8	3.48986
Trial 1	F1	P	F	0:03:46.632-0:03:46.898	IT1	0.594394	8	2.22675		Trial 1	F5	UP	F	0:03:46.632-0:03:46.898	IT1	0.90484	8	3.38975
Trial 1	F1	P	F	0:03:46.898-0:03:47.164	IT1	0.330817	8	1.23932		Trial 1	F5	UP	F	0:03:46.898-0:03:47.164	IT1	0.735461	8	2.75523
Trial 1	F1	P	F	0:03:47.164-0:03:47.430	IT1	0.694518	8	2.60184		Trial 1	F5	UP	F	0:03:47.164-0:03:47.430	IT1	1.12686	8	4.22152
Trial 1	F1	P	F	0:03:47.430-0:03:47.696	IT1	0.452773	8	1.69621		Trial 1	F5	UP	F	0:03:47.430-0:03:47.696	IT1	1.07903	8	4.04234
Trial 1	F1	P	F	0:03:47.696-0:03:47.962	IT1	1.17749	8	4.41116		Trial 1	F5	UP	F	0:03:47.696-0:03:47.962	IT1	0.947211	8	3.54851
Trial 1	F1	P	F	0:03:47.962-0:03:48.228	IT1	3.79848	7	16.2629		Trial 1	F5	UP	F	0:03:47.962-0:03:48.228	IT1	0.672668	7	2.87998
Trial 1	F1	P	F	0:03:48.228-0:03:48.494	IT1	1.28386	8	4.80967		Trial 1	F5	UP	F	0:03:48.228-0:03:48.494	IT1	0.663196	8	2.4845
Trial 1	F1	P	F	0:03:48.494-0:03:48.760	IT1	0.502193	8	1.88133		Trial 1	F5	UP	F	0:03:48.494-0:03:48.760	IT1	1.14089	8	4.27407
Trial 1	F1	P	F	0:03:48.760-0:03:49.026	IT1	0.598997	8	2.24399		Trial 1	F5	UP	F	0:03:48.760-0:03:49.026	IT1	1.69713	8	6.35786
Trial 1	F1	P	F	0:03:49.026-0:03:49.292	IT1	0.168595	8	0.631604		Trial 1	F5	UP	F	0:03:49.026-0:03:49.292	IT1	1.79347	8	6.71882
Trial 1	F1	P	F	0:03:49.292-0:03:49.558	IT1	0.333481	8	1.2493		Trial 1	F5	UP	F	0:03:49.292-0:03:49.558	IT1	0.908713	8	3.40427
Trial 1	F1	P	F	0:03:49.558-0:03:49.824	IT1	0.296627	8	1.11125		Trial 1	F5	UP	F	0:03:49.558-0:03:49.824	IT1	0.291494	8	1.09201
Trial 1	F1	P	F	0:03:49.824-0:03:50.090	IT1	0.723217	8	2.70935		Trial 1	F5	UP	F	0:03:49.824-0:03:50.090	IT1	0.897543	8	3.36243
Trial 1	F1	P	F	0:03:50.090-0:03:50.356	IT1	0.679374	8	2.54509		Trial 1	F5	UP	F	0:03:50.090-0:03:50.356	IT1	1.60721	8	6.02097
Trial 1	F1	P	F	0:03:50.356-0:03:50.622	IT1	0.790568	8	2.96168		Trial 1	F5	UP	F	0:03:50.356-0:03:50.622	IT1	1.92552	8	7.2135
Trial 1	F1	P	F	0:03:50.622-0:03:50.888	IT1	0.785974	8	2.94446		Trial 1	F5	UP	F	0:03:50.622-0:03:50.888	IT1	1.63746	8	6.13433
Trial 1	F1	P	F	0:03:50.888-0:03:51.154	IT1	0.76597	8	2.86954		Trial 1	F5	UP	F	0:03:50.888-0:03:51.154	IT1	0.868206	8	3.25251
Trial 1	F1	P	F	0:03:51.154-0:03:51.420	IT1	1.32897	8	4.97866		Trial 1	F5	UP	F	0:03:51.154-0:03:51.420	IT1	0.872448	8	3.26842
Trial 1	F1	P	F	0:03:51.420-0:03:51.686	IT1	1.25561	8	4.7038		Trial 1	F5	UP	F	0:03:51.420-0:03:51.686	IT1	1.01208	8	3.79149
Trial 1	F1	P	F	0:03:51.686-0:03:51.952	IT1	1.40254	8	5.25428		Trial 1	F5	UP	F	0:03:51.686-0:03:51.952	IT1	0.493788	8	1.84986
Trial 1	F1	P	F	0:03:51.952-0:03:52.218	IT1	1.09129	8	4.08824		Trial 1	F5	UP	F	0:03:51.952-0:03:52.218	IT1	0.256964	8	0.962649
Trial 1	F1	P	F	0:03:52.218-0:03:52.484	IT1	1.35433	8	5.07365		Trial 1	F5	UP	F	0:03:52.218-0:03:52.484	IT1	0.407832	8	1.52784
Trial 1	F1	P	F	0:03:52.484-0:03:52.750	IT1	1.58845	8	5.95072		Trial 1	F5	UP	F	0:03:52.484-0:03:52.750	IT1	0.282963	8	1.06005
Trial 1	F1	P	F	0:03:52.750-0:03:53.016	IT1	1.2108	8	4.53596		Trial 1	F5	UP	F	0:03:52.750-0:03:53.016	IT1	0.207014	8	0.775522
Trial 1	F1	P	F	0:03:53.016-0:03:53.282	IT1	3.80432	8	14.252		Trial 1	F5	UP	F	0:03:53.016-0:03:53.282	IT1	0.144155	8	0.540043
Trial 1	F1	P	F	0:03:53.282-0:03:53.548	IT1	5.61428	8	21.0325		Trial 1	F5	UP	F	0:03:53.282-0:03:53.548	IT1	0.102309	8	0.383275
Trial 1	F1	P	F	0:03:53.548-0:03:53.814	IT1	3.54731	8	13.2891		Trial 1	F5	UP	F	0:03:53.548-0:03:53.814	IT1	0.0796276	8	0.298306
Trial 1	F1	P	F	0:03:53.814-0:03:54.080	IT1	2.45856	8	9.21037		Trial 1	F5	UP	F	0:03:53.814-0:03:54.080	IT1	0.102035	8	0.382249
Trial 1	F1	P	F	0:03:54.080-0:03:54.346	IT1	1.74652	8	6.54288		Trial 1	F5	UP	F	0:03:54.080-0:03:54.346	IT1	0.530951	8	1.98907
Trial 1	F1	P	F	0:03:54.346-0:03:54.612	IT1	0.604425	8	2.26433		Trial 1	F5	UP	F	0:03:54.346-0:03:54.612	IT1	0.71248	8	2.66913
Trial 1	F1	P	F	0:03:54.612-0:03:54.878	IT1	1.5707	8	5.88422		Trial 1	F5	UP	F	0:03:54.612-0:03:54.878	IT1	0.834033	8	3.12449
Trial 1	F1	P	F	0:03:54.878-0:03:55.144	IT1	0.752855	8	2.82039		Trial 1	F5	UP	F	0:03:54.878-0:03:55.144	IT1	0.960812	8	3.59945
Trial 1	F1	P	F	0:03:55.144-0:03:55.410	IT1	1.82246	8	6.82742		Trial 1	F5	UP	F	0:03:55.144-0:03:55.410	IT1	0.778515	8	2.9165
Trial 1	F1	P	F	0:03:55.410-0:03:55.676	IT1	2.39733	8	8.98096		Trial 1	F5	UP	F	0:03:55.410-0:03:55.676	IT1	2.4913	8	9.33301
Trial 1	F1	P	F	0:03:55.676-0:03:55.942	IT1	1.21022	8	4.53382		Trial 1	F5	UP	F	0:03:55.676-0:03:55.942	IT1	1.02627	8	3.84466
Trial 1	F1	P	F	0:03:55.942-0:03:56.208	IT1	0.66313	8	2.48424		Trial 1	F5	UP	F	0:03:55.942-0:03:56.208	IT1	0.347307	8	1.3011
Trial 1	F1	P	F	0:03:56.208-0:03:56.474	IT1	1.38473	8	5.18757		Trial 1	F5	UP	F	0:03:56.208-0:03:56.474	IT1	0.241592	8	0.905067
Trial 1	F1	P	F	0:03:56.474-0:03:56.740	IT1	3.19693	8	11.9765		Trial 1	F5	UP	F	0:03:56.474-0:03:56.740	IT1	0.0463776	8	0.173742
Trial 1	F1	P	F	0:03:56.740-0:03:57.006	IT1	1.18334	8	4.43308		Trial 1	F5	UP	F	0:03:56.740-0:03:57.006	IT1	0.0864419	8	0.323833
Trial 1	F1	P	F	0:03:57.006-0:03:57.272	IT1	1.20012	8	4.49595		Trial 1	F5	UP	F	0:03:57.006-0:03:57.272	IT1	0.224144	8	0.839704
Trial 1	F1	P	F	0:03:57.272-0:03:57.538	IT1	5.8849	8	22.0462		Trial 1	F5	UP	F	0:03:57.272-0:03:57.538	IT1	0.165238	8	0.619022
Trial 1	F1	P	F	0:03:57.538-0:03:57.804	IT1	1.88574	7	8.07371		Trial 1	F5	UP	F	0:03:57.538-0:03:57.804	IT1	0.0625996	7	0.268015
Trial 1	F1	P	F	0:03:57.804-0:03:58.070	IT1	1.73137	8	6.48612		Trial 1	F5	UP	F	0:03:57.804-0:03:58.070	IT1	0.0743919	8	0.27869
Trial 1	F1	P	F	0:03:58.070-0:03:58.336	IT1	0.401866	8	1.5055		Trial 1	F5	UP	F	0:03:58.070-0:03:58.336	IT1	0.0769358	8	0.28822
Trial 1	F1	P	F	0:03:58.336-0:03:58.602	IT1	5.15297	8	19.3042		Trial 1	F5	UP	F	0:03:58.336-0:03:58.602	IT1	0.227623	8	0.852728
Trial 1	F1	P	F	0:03:58.602-0:03:58.868	IT1	7.62144	8	28.5521		Trial 1	F5	UP	F	0:03:58.602-0:03:58.868	IT1	0.383883	8	1.43812
Trial 1	F1	P	F	0:03:58.868-0:03:59.134	IT1	2.7841	8	10.4299		Trial 1	F5	UP	F	0:03:58.868-0:03:59.134	IT1	0.52517	8	1.96742
Trial 1	F1	P	F	0:03:59.134-0:03:59.400	IT1	1.27313	8	4.76946		Trial 1	F5	UP	F	0:03:59.134-0:03:59.400	IT1	0.343942	8	1.2885
Trial 1	F1	P	F	0:03:59.400-0:03:59.666	IT1	1.56005	8	5.84437		Trial 1	F5	UP	F	0:03:59.400-0:03:59.666	IT1	1.23983	8	4.64472
Trial 1	F1	P	F	0:03:59.666-0:03:59.932	IT1	5.4557	8	20.4385		Trial 1	F5	UP	F	0:03:59.666-0:03:59.932	IT1	0.498692	8	1.86822
Trial 1	F1	P	F	0:03:59.932-0:04:00.198	IT1	1.72926	8	6.47826		Trial 1	F5	UP	F	0:03:59.932-0:04:00.198	IT1	0.263965	8	0.988882
Trial 1	F1	P	F	0:04:00.198-0:04:00.464	IT1	1.54066	8	5.77169		Trial 1	F5	UP	F	0:04:00.198-0:04:00.464	IT1	0.1802	8	0.675074
Trial 1	F1	P	F	0:04:00.464-0:04:00.730	IT1	2.68436	8	10.0563		Trial 1	F5	UP	F	0:04:00.464-0:04:00.730	IT1	0.0436019	8	0.163345
Trial 1	F1	P	F	0:04:00.730-0:04:00.996	IT1	4.08709	8	15.3112		Trial 1	F5	UP	F	0:04:00.730-0:04:00.996	IT1	0.0940831	8	0.352458
Trial 1	F1	P	F	0:04:00.996-0:04:01.262	IT1	3.77382	8	14.1377		Trial 1	F5	UP	F	0:04:00.996-0:04:01.262	IT1	0.148194	8	0.555172
Trial 1	F1	P	F	0:04:01.262-0:04:01.528	IT1	3.13169	8	11.7321		Trial 1	F5	UP	F	0:04:01.262-0:04:01.528	IT1	0.149744	8	0.560977
Trial 1	F1	P	F	0:04:01.528-0:04:01.794	IT1	2.15859	8	8.08662		Trial 1	F5	UP	F	0:04:01.528-0:04:01.794	IT1	0.158188	8	0.592608
Trial 1	F1	P	F	0:04:01.794-0:04:02.060	IT1	1.79093	8	6.7093		Trial 1	F5	UP	F	0:04:01.794-0:04:02.060	IT1	0.135001	8	0.505747
Trial 1	F1	P	F	0:04:02.060-0:04:02.326	IT1	2.31098	8	8.65752		Trial 1	F5	UP	F	0:04:02.060-0:04:02.326	IT1	0.128511	8	0.481434
Trial 1	F1	P	F	0:04:02.326-0:04:02.592	IT1	1.5461	8	5.79205		Trial 1	F5	UP	F	0:04:02.326-0:04:02.592	IT1	0.195097	8	0.73088
Trial 1	F1	P	F	0:04:02.592-0:04:02.858	IT1	1.87401	8	7.02052		Trial 1	F5	UP	F	0:04:02.592-0:04:02.858	IT1	0.200692	8	0.751848
Trial 1	F1	P	F	0:04:02.858-0:04:03.124	IT1	1.73456	8	6.4981		Trial 1	F5	UP	F	0:04:02.858-0:04:03.124	IT1	0.246502	8	0.923457
Trial 1	F1	P	F	0:04:03.124-0:04:03.390	IT1	2.04819	8	7.67304		Trial 1	F5	UP	F	0:04:03.124-0:04:03.390	IT1	1.03667	8	3.88362
Trial 1	F1	P	F	0:04:03.390-0:04:03.656	IT1	1.29944	8	4.86802		Trial 1	F5	UP	F	0:04:03.390-0:04:03.656	IT1	0.833542	8	3.12265
Trial 1	F1	P	F	0:04:03.656-0:04:03.922	IT1	3.40677	8	12.7626		Trial 1	F5	UP	F	0:04:03.656-0:04:03.922	IT1	1.90604	8	7.14046
Trial 1	F1	P	F	0:04:03.922-0:04:04.188	IT1	1.74803	8	6.54859		Trial 1	F5	UP	F	0:04:03.922-0:04:04.188	IT1	2.98252	8	11.1733
Trial 1	F1	P	F	0:04:04.188-0:04:04.454	IT1	0.944722	8	3.53915		Trial 1	F5	UP	F	0:04:04.188-0:04:04.454	IT1	3.39568	8	12.721
Trial 1	F1	P	F	0:04:04.454-0:04:04.720	IT1	2.22161	8	8.32277		Trial 1	F5	UP	F	0:04:04.454-0:04:04.720	IT1	4.06904	8	15.2437
Trial 1	F1	P	F	0:04:04.720-0:04:04.986	IT1	1.14375	8	4.28479		Trial 1	F5	UP	F	0:04:04.720-0:04:04.986	IT1	3.90021	8	14.6111
Trial 1	F1	P	F	0:04:04.986-0:04:05.252	IT1	1.62617	8	6.09205		Trial 1	F5	UP	F	0:04:04.986-0:04:05.252	IT1	1.62694	8	6.09492
Trial 1	F1	P	F	0:04:05.252-0:04:05.518	IT1	0.599861	8	2.24725		Trial 1	F5	UP	F	0:04:05.252-0:04:05.518	IT1	2.78616	8	10.4377
Trial 1	F1	P	F	0:04:05.518-0:04:05.784	IT1	0.718748	8	2.69261		Trial 1	F5	UP	F	0:04:05.518-0:04:05.784	IT1	2.65418	8	9.94321
Trial 1	F1	P	F	0:04:05.784-0:04:06.050	IT1	0.631158	8	2.36449		Trial 1	F5	UP	F	0:04:05.784-0:04:06.050	IT1	0.698835	8	2.61801
Trial 1	F1	P	F	0:04:06.050-0:04:06.316	IT1	1.52674	8	5.71954		Trial 1	F5	UP	F	0:04:06.050-0:04:06.316	IT1	0.222894	8	0.835014
Trial 1	F1	P	F	0:04:06.316-0:04:06.582	IT1	1.19297	8	4.46917		Trial 1	F5	UP	F	0:04:06.316-0:04:06.582	IT1	0.28796	8	1.07877
Trial 1	F1	P	F	0:04:06.582-0:04:06.848	IT1	0.40089	8	1.50184		Trial 1	F5	UP	F	0:04:06.582-0:04:06.848	IT1	0.877671	8	3.28798
Trial 1	F1	P	F	0:04:06.848-0:04:07.114	IT1	1.15438	8	4.32461		Trial 1	F5	UP	F	0:04:06.848-0:04:07.114	IT1	1.15688	8	4.33395
Trial 1	F1	P	F	0:04:07.114-0:04:07.380	IT1	1.01633	7	4.35136		Trial 1	F5	UP	F	0:04:07.114-0:04:07.380	IT1	0.227509	7	0.974064
Trial 1	F1	P	F	0:04:07.380-0:04:07.646	IT1	1.67929	8	6.29105		Trial 1	F5	UP	F	0:04:07.380-0:04:07.646	IT1	1.09463	8	4.10076
Trial 1	F1	P	F	0:04:07.646-0:04:07.912	IT1	0.468626	8	1.75559		Trial 1	F5	UP	F	0:04:07.646-0:04:07.912	IT1	0.53703	8	2.01185
Trial 1	F1	P	F	0:04:07.912-0:04:08.178	IT1	0.258424	8	0.968118		Trial 1	F5	UP	F	0:04:07.912-0:04:08.178	IT1	2.32041	8	8.69283
Trial 1	F1	P	F	0:04:08.178-0:04:08.444	IT1	0.954883	8	3.57724		Trial 1	F5	UP	F	0:04:08.178-0:04:08.444	IT1	2.19647	8	8.22855
Trial 1	F1	P	F	0:04:08.444-0:04:08.710	IT1	2.90091	8	10.8675		Trial 1	F5	UP	F	0:04:08.444-0:04:08.710	IT1	0.669848	8	2.50941
Trial 1	F1	P	F	0:04:08.710-0:04:08.976	IT1	2.50902	8	9.39943		Trial 1	F5	UP	F	0:04:08.710-0:04:08.976	IT1	0.171004	8	0.640626
Trial 1	F1	P	F	0:04:08.976-0:04:09.242	IT1	4.10102	8	15.3634		Trial 1	F5	UP	F	0:04:08.976-0:04:09.242	IT1	0.204322	8	0.765438
Trial 1	F1	P	F	0:04:09.242-0:04:09.508	IT1	2.56931	8	9.6253		Trial 1	F5	UP	F	0:04:09.242-0:04:09.508	IT1	0.102479	8	0.383914
Trial 1	F1	P	F	0:04:09.508-0:04:09.774	IT1	0.473163	8	1.77258		Trial 1	F5	UP	F	0:04:09.508-0:04:09.774	IT1	0.278187	8	1.04216
Trial 1	F1	P	F	0:04:09.774-0:04:10.040	IT1	0.294499	8	1.10327		Trial 1	F5	UP	F	0:04:09.774-0:04:10.040	IT1	0.493698	8	1.84951
Trial 1	F1	P	F	0:04:10.040-0:04:10.306	IT1	0.225233	8	0.843785		Trial 1	F5	UP	F	0:04:10.040-0:04:10.306	IT1	0.29232	8	1.09511
Trial 1	F1	P	F	0:04:10.306-0:04:10.572	IT1	0.300535	8	1.12588		Trial 1	F5	UP	F	0:04:10.306-0:04:10.572	IT1	0.469116	8	1.75742
Trial 1	F1	P	F	0:04:10.572-0:04:10.838	IT1	0.225437	8	0.844545		Trial 1	F5	UP	F	0:04:10.572-0:04:10.838	IT1	0.372077	8	1.3939
Trial 1	F1	P	F	0:04:10.838-0:04:11.104	IT1	0.245837	8	0.920967		Trial 1	F5	UP	F	0:04:10.838-0:04:11.104	IT1	0.645777	8	2.41923
Trial 1	F1	P	F	0:04:11.104-0:04:11.370	IT1	0.372409	8	1.39514		Trial 1	F5	UP	F	0:04:11.104-0:04:11.370	IT1	0.621455	8	2.32813
Trial 1	F1	P	F	0:04:11.370-0:04:11.636	IT1	0.309905	8	1.16098		Trial 1	F5	UP	F	0:04:11.370-0:04:11.636	IT1	1.30743	8	4.89797
Trial 1	F1	P	F	0:04:11.636-0:04:11.902	IT1	0.375264	8	1.40583		Trial 1	F5	UP	F	0:04:11.636-0:04:11.902	IT1	0.99141	8	3.71407
Trial 1	F1	P	F	0:04:11.902-0:04:12.168	IT1	0.455009	8	1.70458		Trial 1	F5	UP	F	0:04:11.902-0:04:12.168	IT1	0.68209	8	2.55529
Trial 1	F1	P	F	0:04:12.168-0:04:12.434	IT1	0.435847	8	1.63279		Trial 1	F5	UP	F	0:04:12.168-0:04:12.434	IT1	1.3503	8	5.05856
Trial 1	F1	P	F	0:04:12.434-0:04:12.700	IT1	0.670283	8	2.51106		Trial 1	F5	UP	F	0:04:12.434-0:04:12.700	IT1	1.00219	8	3.75445
Trial 1	F1	P	F	0:04:12.700-0:04:12.966	IT1	0.832006	8	3.1169		Trial 1	F5	UP	F	0:04:12.700-0:04:12.966	IT1	0.378441	8	1.41774
Trial 1	F1	P	F	0:04:12.966-0:04:13.232	IT1	1.7604	8	6.59486		Trial 1	F5	UP	F	0:04:12.966-0:04:13.232	IT1	1.43929	8	5.39192
Trial 1	F1	P	F	0:04:13.232-0:04:13.498	IT1	2.4276	8	9.09444		Trial 1	F5	UP	F	0:04:13.232-0:04:13.498	IT1	1.3476	8	5.04848
Trial 1	F1	P	F	0:04:13.498-0:04:13.764	IT1	3.58803	8	13.4416		Trial 1	F5	UP	F	0:04:13.498-0:04:13.764	IT1	2.98055	8	11.1659
Trial 1	F1	P	F	0:04:13.764-0:04:14.030	IT1	3.62922	8	13.596		Trial 1	F5	UP	F	0:04:13.764-0:04:14.030	IT1	2.2507	8	8.43167
Trial 1	F1	P	F	0:04:14.030-0:04:14.296	IT1	3.15537	8	11.8208		Trial 1	F5	UP	F	0:04:14.030-0:04:14.296	IT1	1.82198	8	6.82562
Trial 1	F1	P	F	0:04:14.296-0:04:14.562	IT1	2.30249	8	8.62569		Trial 1	F5	UP	F	0:04:14.296-0:04:14.562	IT1	4.4477	8	16.6622
Trial 1	F1	P	F	0:04:14.562-0:04:14.828	IT1	0.841904	8	3.15398		Trial 1	F5	UP	F	0:04:14.562-0:04:14.828	IT1	4.45944	8	16.7062
Trial 1	F1	P	F	0:04:14.828-0:04:15.094	IT1	0.303287	8	1.13619		Trial 1	F5	UP	F	0:04:14.828-0:04:15.094	IT1	3.83046	8	14.3498
Trial 1	F1	P	F	0:04:15.094-0:04:15.360	IT1	0.523099	8	1.95965		Trial 1	F5	UP	F	0:04:15.094-0:04:15.360	IT1	2.18668	8	8.19184
Trial 1	F1	P	F	0:04:15.360-0:04:15.626	IT1	1.59103	8	5.96041		Trial 1	F5	UP	F	0:04:15.360-0:04:15.626	IT1	0.448183	8	1.67901
Trial 1	F1	P	F	0:04:15.626-0:04:15.892	IT1	0.610309	8	2.28637		Trial 1	F5	UP	F	0:04:15.626-0:04:15.892	IT1	0.443272	8	1.66061
Trial 1	F1	P	F	0:04:15.892-0:04:16.158	IT1	0.502063	8	1.88085		Trial 1	F5	UP	F	0:04:15.892-0:04:16.158	IT1	0.224853	8	0.842361
Trial 1	F1	P	F	0:04:16.158-0:04:16.424	IT1	0.765572	8	2.86802		Trial 1	F5	UP	F	0:04:16.158-0:04:16.424	IT1	0.203457	8	0.762198
Trial 1	F1	P	F	0:04:16.424-0:04:16.690	IT1	0.445203	7	1.90611		Trial 1	F5	UP	F	0:04:16.424-0:04:16.690	IT1	0.187152	7	0.80128
Trial 1	F1	P	F	0:04:16.690-0:04:16.956	IT1	0.611893	8	2.29229		Trial 1	F5	UP	F	0:04:16.690-0:04:16.956	IT1	0.401853	8	1.50544
Trial 1	F1	P	F	0:04:16.956-0:04:17.222	IT1	0.465765	8	1.74487		Trial 1	F5	UP	F	0:04:16.956-0:04:17.222	IT1	0.342575	8	1.28338
Trial 1	F1	P	F	0:04:17.222-0:04:17.488	IT1	1.10951	8	4.15649		Trial 1	F5	UP	F	0:04:17.222-0:04:17.488	IT1	0.461735	8	1.72977
Trial 1	F1	P	F	0:04:17.488-0:04:17.754	IT1	1.64677	8	6.16922		Trial 1	F5	UP	F	0:04:17.488-0:04:17.754	IT1	0.472152	8	1.76881
Trial 1	F1	P	F	0:04:17.754-0:04:18.020	IT1	0.680835	8	2.55057		Trial 1	F5	UP	F	0:04:17.754-0:04:18.020	IT1	0.424066	8	1.58865
Trial 1	F1	P	F	0:04:18.020-0:04:18.286	IT1	0.267545	8	1.00229		Trial 1	F5	UP	F	0:04:18.020-0:04:18.286	IT1	0.218659	8	0.81915
Trial 1	F1	P	F	0:04:18.286-0:04:18.552	IT1	1.00757	8	3.77461		Trial 1	F5	UP	F	0:04:18.286-0:04:18.552	IT1	0.148933	8	0.557946
Trial 1	F1	P	F	0:04:18.552-0:04:18.818	IT1	2.69777	8	10.1065		Trial 1	F5	UP	F	0:04:18.552-0:04:18.818	IT1	0.351481	8	1.31673
Trial 1	F1	P	F	0:04:18.818-0:04:19.084	IT1	3.7386	8	14.0058		Trial 1	F5	UP	F	0:04:18.818-0:04:19.084	IT1	0.986449	8	3.69549
Trial 1	F1	P	F	0:04:19.084-0:04:19.350	IT1	2.4483	8	9.17192		Trial 1	F5	UP	F	0:04:19.084-0:04:19.350	IT1	0.769526	8	2.88283
Trial 1	F1	P	F	0:04:19.350-0:04:19.616	IT1	1.5027	8	5.62947		Trial 1	F5	UP	F	0:04:19.350-0:04:19.616	IT1	0.548529	8	2.05492
Trial 1	F1	P	F	0:04:19.616-0:04:19.882	IT1	0.484325	8	1.8144		Trial 1	F5	UP	F	0:04:19.616-0:04:19.882	IT1	1.45474	8	5.44984
Trial 1	F1	P	F	0:04:19.882-0:04:20.148	IT1	0.849935	8	3.18407		Trial 1	F5	UP	F	0:04:19.882-0:04:20.148	IT1	1.70227	8	6.37711
Trial 1	F1	P	F	0:04:20.148-0:04:20.414	IT1	0.794265	8	2.97553		Trial 1	F5	UP	F	0:04:20.148-0:04:20.414	IT1	2.2796	8	8.53991
Trial 1	F1	P	F	0:04:20.414-0:04:20.680	IT1	0.34657	8	1.29835		Trial 1	F5	UP	F	0:04:20.414-0:04:20.680	IT1	0.409985	8	1.53591
Trial 1	F1	P	F	0:04:20.680-0:04:20.946	IT1	0.181696	8	0.680679		Trial 1	F5	UP	F	0:04:20.680-0:04:20.946	IT1	0.29783	8	1.11575
Trial 1	F1	P	F	0:04:20.946-0:04:21.212	IT1	0.236324	8	0.885331		Trial 1	F5	UP	F	0:04:20.946-0:04:21.212	IT1	0.550565	8	2.06256
Trial 1	F1	P	F	0:04:21.212-0:04:21.478	IT1	0.221266	8	0.828914		Trial 1	F5	UP	F	0:04:21.212-0:04:21.478	IT1	0.690044	8	2.58508
Trial 1	F1	P	F	0:04:21.478-0:04:21.744	IT1	0.227807	8	0.853425		Trial 1	F5	UP	F	0:04:21.478-0:04:21.744	IT1	0.856242	8	3.2077
Trial 1	F1	P	F	0:04:21.744-0:04:22.010	IT1	0.227831	8	0.853511		Trial 1	F5	UP	F	0:04:21.744-0:04:22.010	IT1	0.816796	8	3.05992
Trial 1	F1	P	F	0:04:22.010-0:04:22.276	IT1	0.571343	8	2.14039		Trial 1	F5	UP	F	0:04:22.010-0:04:22.276	IT1	0.683038	8	2.55883
Trial 1	F1	P	F	0:04:22.276-0:04:22.542	IT1	0.394955	8	1.47961		Trial 1	F5	UP	F	0:04:22.276-0:04:22.542	IT1	1.27258	8	4.7674
Trial 1	F1	P	F	0:04:22.542-0:04:22.808	IT1	0.94666	8	3.54644		Trial 1	F5	UP	F	0:04:22.542-0:04:22.808	IT1	0.431042	8	1.61478
Trial 1	F1	P	F	0:04:22.808-0:04:23.074	IT1	1.03068	8	3.86119		Trial 1	F5	UP	F	0:04:22.808-0:04:23.074	IT1	1.43312	8	5.36883
Trial 1	F1	P	F	0:04:23.074-0:04:23.340	IT1	3.18252	8	11.9225		Trial 1	F5	UP	F	0:04:23.074-0:04:23.340	IT1	0.702757	8	2.63269
Trial 1	F1	P	F	0:04:23.340-0:04:23.606	IT1	4.75239	8	17.8036		Trial 1	F5	UP	F	0:04:23.340-0:04:23.606	IT1	0.807355	8	3.02456
Trial 1	F1	P	F	0:04:23.606-0:04:23.872	IT1	3.32511	8	12.4567		Trial 1	F5	UP	F	0:04:23.606-0:04:23.872	IT1	0.786221	8	2.9454
Trial 1	F1	P	F	0:04:23.872-0:04:24.138	IT1	3.63272	8	13.6091		Trial 1	F5	UP	F	0:04:23.872-0:04:24.138	IT1	0.826113	8	3.09482
Trial 1	F1	P	F	0:04:24.138-0:04:24.404	IT1	1.73553	8	6.50174		Trial 1	F5	UP	F	0:04:24.138-0:04:24.404	IT1	0.485956	8	1.82051
Trial 1	F1	P	F	0:04:24.404-0:04:24.670	IT1	1.11432	8	4.17451		Trial 1	F5	UP	F	0:04:24.404-0:04:24.670	IT1	0.292649	8	1.09634
Trial 1	F1	P	F	0:04:24.670-0:04:24.936	IT1	1.0725	8	4.01782		Trial 1	F5	UP	F	0:04:24.670-0:04:24.936	IT1	0.414722	8	1.55365
Trial 1	F1	P	F	0:04:24.936-0:04:25.202	IT1	2.09221	8	7.83794		Trial 1	F5	UP	F	0:04:24.936-0:04:25.202	IT1	0.405056	8	1.51745
Trial 1	F1	P	F	0:04:25.202-0:04:25.468	IT1	1.75265	8	6.56587		Trial 1	F5	UP	F	0:04:25.202-0:04:25.468	IT1	0.561455	8	2.10335
Trial 1	F1	P	F	0:04:25.468-0:04:25.734	IT1	2.21021	8	8.28003		Trial 1	F5	UP	F	0:04:25.468-0:04:25.734	IT1	0.733009	8	2.74603
Trial 1	F1	P	F	0:04:25.734-0:04:26.000	IT1	1.49356	8	5.59522		Trial 1	F5	UP	F	0:04:25.734-0:04:26.000	IT1	0.73085	8	2.73794
Trial 1	F1	P	F	0:04:26.000-0:04:26.266	IT1	1.0157	7	4.34864		Trial 1	F5	UP	F	0:04:26.000-0:04:26.266	IT1	0.479752	7	2.05402
Trial 1	F1	P	F	0:04:26.266-0:04:26.532	IT1	3.88779	8	14.5646		Trial 1	F5	UP	F	0:04:26.266-0:04:26.532	IT1	0.444895	8	1.66669
Trial 1	F1	P	F	0:04:26.532-0:04:26.798	IT1	2.48036	8	9.29204		Trial 1	F5	UP	F	0:04:26.532-0:04:26.798	IT1	0.738507	8	2.76662
Trial 1	F1	P	F	0:04:26.798-0:04:27.064	IT1	0.370681	8	1.38866		Trial 1	F5	UP	F	0:04:26.798-0:04:27.064	IT1	3.86986	8	14.4975
Trial 1	F1	P	F	0:04:27.064-0:04:27.330	IT1	1.20379	8	4.50971		Trial 1	F5	UP	F	0:04:27.064-0:04:27.330	IT1	1.84433	8	6.90935
Trial 1	F1	P	F	0:04:27.330-0:04:27.596	IT1	1.60503	8	6.01286		Trial 1	F5	UP	F	0:04:27.330-0:04:27.596	IT1	1.61265	8	6.04139
Trial 1	F1	P	F	0:04:27.596-0:04:27.862	IT1	1.52018	8	5.69498		Trial 1	F5	UP	F	0:04:27.596-0:04:27.862	IT1	4.27267	8	16.0065
Trial 1	F1	P	F	0:04:27.862-0:04:28.128	IT1	1.74257	8	6.5281		Trial 1	F5	UP	F	0:04:27.862-0:04:28.128	IT1	4.89884	8	18.3522
Trial 1	F1	P	F	0:04:28.128-0:04:28.394	IT1	1.28707	8	4.82166		Trial 1	F5	UP	F	0:04:28.128-0:04:28.394	IT1	3.83933	8	14.3831
Trial 1	F1	P	F	0:04:28.394-0:04:28.660	IT1	0.740483	8	2.77404		Trial 1	F5	UP	F	0:04:28.394-0:04:28.660	IT1	3.06267	8	11.4735
Trial 1	F1	P	F	0:04:28.660-0:04:28.926	IT1	0.37724	8	1.41323		Trial 1	F5	UP	F	0:04:28.660-0:04:28.926	IT1	2.56794	8	9.62011
Trial 1	F1	P	F	0:04:28.926-0:04:29.192	IT1	1.05536	8	3.95366		Trial 1	F5	UP	F	0:04:28.926-0:04:29.192	IT1	3.51634	8	13.1731
Trial 1	F1	P	F	0:04:29.192-0:04:29.458	IT1	1.61547	8	6.05197		Trial 1	F5	UP	F	0:04:29.192-0:04:29.458	IT1	3.70611	8	13.884
Trial 1	F1	P	F	0:04:29.458-0:04:29.724	IT1	4.12585	8	15.4565		Trial 1	F5	UP	F	0:04:29.458-0:04:29.724	IT1	5.20005	8	19.4807
Trial 1	F1	P	F	0:04:29.724-0:04:29.990	IT1	2.07281	8	7.76528		Trial 1	F5	UP	F	0:04:29.724-0:04:29.990	IT1	0.675929	8	2.53221
Trial 1	F1	P	F	0:04:29.990-0:04:30.256	IT1	1.48571	8	5.56581		Trial 1	F5	UP	F	0:04:29.990-0:04:30.256	IT1	0.57593	8	2.15757
Trial 1	F1	P	F	0:04:30.256-0:04:30.522	IT1	1.0986	8	4.11563		Trial 1	F5	UP	F	0:04:30.256-0:04:30.522	IT1	0.199229	8	0.746369
Trial 1	F1	P	F	0:04:30.522-0:04:30.788	IT1	0.900449	8	3.37329		Trial 1	F5	UP	F	0:04:30.522-0:04:30.788	IT1	0.791318	8	2.96447
Trial 1	F1	P	F	0:04:30.788-0:04:31.054	IT1	0.265251	8	0.9937		Trial 1	F5	UP	F	0:04:30.788-0:04:31.054	IT1	2.4756	8	9.27424
Trial 1	F1	P	F	0:04:31.054-0:04:31.320	IT1	0.396523	8	1.48548		Trial 1	F5	UP	F	0:04:31.054-0:04:31.320	IT1	3.07245	8	11.5103
Trial 1	F1	P	F	0:04:31.320-0:04:31.586	IT1	1.50574	8	5.64091		Trial 1	F5	UP	F	0:04:31.320-0:04:31.586	IT1	0.849959	8	3.18415
Trial 1	F1	P	F	0:04:31.586-0:04:31.852	IT1	1.23095	8	4.61148		Trial 1	F5	UP	F	0:04:31.586-0:04:31.852	IT1	1.13071	8	4.23595
Trial 1	F1	P	F	0:04:31.852-0:04:32.118	IT1	0.866923	8	3.2477		Trial 1	F5	UP	F	0:04:31.852-0:04:32.118	IT1	0.698735	8	2.61763
Trial 1	F1	P	F	0:04:32.118-0:04:32.384	IT1	1.04879	8	3.92904		Trial 1	F5	UP	F	0:04:32.118-0:04:32.384	IT1	1.64833	8	6.17504
Trial 1	F1	P	F	0:04:32.384-0:04:32.650	IT1	0.871553	8	3.26507		Trial 1	F5	UP	F	0:04:32.384-0:04:32.650	IT1	1.89572	8	7.10184
Trial 1	F1	P	F	0:04:32.650-0:04:32.916	IT1	2.50881	8	9.3986		Trial 1	F5	UP	F	0:04:32.650-0:04:32.916	IT1	0.821901	8	3.07904
Trial 1	F1	P	F	0:04:32.916-0:04:33.182	IT1	2.15629	8	8.07798		Trial 1	F5	UP	F	0:04:32.916-0:04:33.182	IT1	3.31118	8	12.4045
Trial 1	F1	P	F	0:04:33.182-0:04:33.448	IT1	0.696488	8	2.60921		Trial 1	F5	UP	F	0:04:33.182-0:04:33.448	IT1	1.80689	8	6.76901
Trial 1	F1	P	F	0:04:33.448-0:04:33.714	IT1	0.245208	8	0.918617		Trial 1	F5	UP	F	0:04:33.448-0:04:33.714	IT1	1.97241	8	7.38912
Trial 1	F1	P	F	0:04:33.714-0:04:33.980	IT1	0.627529	8	2.35089		Trial 1	F5	UP	F	0:04:33.714-0:04:33.980	IT1	0.637096	8	2.38676
Trial 1	F1	P	F	0:04:33.980-0:04:34.246	IT1	0.556568	8	2.08503		Trial 1	F5	UP	F	0:04:33.980-0:04:34.246	IT1	0.718219	8	2.69063
Trial 1	F1	P	F	0:04:34.246-0:04:34.512	IT1	3.53486	8	13.2425		Trial 1	F5	UP	F	0:04:34.246-0:04:34.512	IT1	0.482372	8	1.80709
Trial 1	F1	P	F	0:04:34.512-0:04:34.778	IT1	3.21879	8	12.0584		Trial 1	F5	UP	F	0:04:34.512-0:04:34.778	IT1	0.397582	8	1.48944
Trial 1	F1	P	F	0:04:34.778-0:04:35.044	IT1	1.28303	8	4.80656		Trial 1	F5	UP	F	0:04:34.778-0:04:35.044	IT1	3.86048	8	14.4622
Trial 1	F1	P	F	0:04:35.044-0:04:35.310	IT1	1.126	8	4.21828		Trial 1	F5	UP	F	0:04:35.044-0:04:35.310	IT1	2.97133	8	11.1314
Trial 1	F1	P	F	0:04:35.310-0:04:35.576	IT1	1.32364	8	4.95869		Trial 1	F5	UP	F	0:04:35.310-0:04:35.576	IT1	3.2117	8	12.0318
Trial 1	F1	P	F	0:04:35.576-0:04:35.842	IT1	1.43864	7	6.15945		Trial 1	F5	UP	F	0:04:35.576-0:04:35.842	IT1	4.47566	7	19.1621
Trial 1	F1	P	F	0:04:35.842-0:04:36.108	IT1	1.02497	8	3.83979		Trial 1	F5	UP	F	0:04:35.842-0:04:36.108	IT1	5.64687	8	21.1546
Trial 1	F1	P	F	0:04:36.108-0:04:36.374	IT1	0.66813	8	2.50298		Trial 1	F5	UP	F	0:04:36.108-0:04:36.374	IT1	3.22661	8	12.0877
Trial 1	F1	P	F	0:04:36.374-0:04:36.640	IT1	1.30912	8	4.90428		Trial 1	F5	UP	F	0:04:36.374-0:04:36.640	IT1	4.64543	8	17.4029
Trial 1	F1	P	F	0:04:36.640-0:04:36.906	IT1	1.27359	8	4.77122		Trial 1	F5	UP	F	0:04:36.640-0:04:36.906	IT1	4.98188	8	18.6634
Trial 1	F1	P	F	0:04:36.906-0:04:37.172	IT1	2.03388	8	7.61943		Trial 1	F5	UP	F	0:04:36.906-0:04:37.172	IT1	4.87297	8	18.2553
Trial 1	F1	P	F	0:04:37.172-0:04:37.438	IT1	1.75537	8	6.57605		Trial 1	F5	UP	F	0:04:37.172-0:04:37.438	IT1	2.65477	8	9.94544
Trial 1	F1	P	F	0:04:37.438-0:04:37.704	IT1	1.3797	8	5.1687		Trial 1	F5	UP	F	0:04:37.438-0:04:37.704	IT1	2.99037	8	11.2027
Trial 1	F1	P	F	0:04:37.704-0:04:37.970	IT1	1.58861	8	5.9513		Trial 1	F5	UP	F	0:04:37.704-0:04:37.970	IT1	1.32013	8	4.94551
Trial 1	F1	P	F	0:04:37.970-0:04:38.236	IT1	1.48513	8	5.56369		Trial 1	F5	UP	F	0:04:37.970-0:04:38.236	IT1	0.837205	8	3.13638
Trial 1	F1	P	F	0:04:38.236-0:04:38.502	IT1	0.526996	8	1.97425		Trial 1	F5	UP	F	0:04:38.236-0:04:38.502	IT1	0.528279	8	1.97906
Trial 1	F1	P	F	0:04:38.502-0:04:38.768	IT1	0.657012	8	2.46134		Trial 1	F5	UP	F	0:04:38.502-0:04:38.768	IT1	0.992637	8	3.71871
Trial 1	F1	P	F	0:04:38.768-0:04:39.034	IT1	0.269234	8	1.00862		Trial 1	F5	UP	F	0:04:38.768-0:04:39.034	IT1	0.757352	8	2.83723
Trial 1	F1	P	F	0:04:39.034-0:04:39.300	IT1	0.828547	8	3.10394		Trial 1	F5	UP	F	0:04:39.034-0:04:39.300	IT1	2.5788	8	9.66087
Trial 1	F1	P	F	0:04:39.300-0:04:39.566	IT1	2.57483	8	9.64595		Trial 1	F5	UP	F	0:04:39.300-0:04:39.566	IT1	1.94149	8	7.27329
Trial 1	F1	P	F	0:04:39.566-0:04:39.832	IT1	4.21528	8	15.7915		Trial 1	F5	UP	F	0:04:39.566-0:04:39.832	IT1	1.39811	8	5.23765
Trial 1	F1	P	F	0:04:39.832-0:04:40.098	IT1	3.03034	8	11.3524		Trial 1	F5	UP	F	0:04:39.832-0:04:40.098	IT1	0.528528	8	1.97999
Trial 1	F1	P	F	0:04:40.098-0:04:40.364	IT1	0.628371	8	2.35403		Trial 1	F5	UP	F	0:04:40.098-0:04:40.364	IT1	0.691397	8	2.59015
Trial 1	F1	P	F	0:04:40.364-0:04:40.630	IT1	0.379824	8	1.42291		Trial 1	F5	UP	F	0:04:40.364-0:04:40.630	IT1	0.824157	8	3.08749
Trial 1	F1	P	F	0:04:40.630-0:04:40.896	IT1	0.216467	8	0.810942		Trial 1	F5	UP	F	0:04:40.630-0:04:40.896	IT1	1.16479	8	4.36363
Trial 1	F1	P	F	0:04:40.896-0:04:41.162	IT1	0.690593	8	2.58712		Trial 1	F5	UP	F	0:04:40.896-0:04:41.162	IT1	0.535297	8	2.00535
Trial 1	F1	P	F	0:04:41.162-0:04:41.428	IT1	0.540538	8	2.02499		Trial 1	F5	UP	F	0:04:41.162-0:04:41.428	IT1	0.685584	8	2.56838
Trial 1	F1	P	F	0:04:41.428-0:04:41.694	IT1	0.933237	8	3.49614		Trial 1	F5	UP	F	0:04:41.428-0:04:41.694	IT1	1.12084	8	4.19895
Trial 1	F1	P	F	0:04:41.694-0:04:41.960	IT1	0.673114	8	2.52165		Trial 1	F5	UP	F	0:04:41.694-0:04:41.960	IT1	1.58056	8	5.92116
Trial 1	F1	P	F	0:04:41.960-0:04:42.226	IT1	0.967821	8	3.6257		Trial 1	F5	UP	F	0:04:41.960-0:04:42.226	IT1	0.544996	8	2.0417
Trial 1	F1	P	F	0:04:42.226-0:04:42.492	IT1	1.10637	8	4.1447		Trial 1	F5	UP	F	0:04:42.226-0:04:42.492	IT1	1.94406	8	7.28293
Trial 1	F1	P	F	0:04:42.492-0:04:42.758	IT1	1.22435	8	4.58675		Trial 1	F5	UP	F	0:04:42.492-0:04:42.758	IT1	1.37774	8	5.16135
Trial 1	F1	P	F	0:04:42.758-0:04:43.024	IT1	0.796929	8	2.98548		Trial 1	F5	UP	F	0:04:42.758-0:04:43.024	IT1	1.24977	8	4.68193
Trial 1	F1	P	F	0:04:43.024-0:04:43.290	IT1	1.1981	8	4.48837		Trial 1	F5	UP	F	0:04:43.024-0:04:43.290	IT1	0.763047	8	2.85857
Trial 1	F1	P	F	0:04:43.290-0:04:43.556	IT1	2.05738	8	7.70746		Trial 1	F5	UP	F	0:04:43.290-0:04:43.556	IT1	0.644453	8	2.41429
Trial 1	F1	P	F	0:04:43.556-0:04:43.822	IT1	0.7517	8	2.81605		Trial 1	F5	UP	F	0:04:43.556-0:04:43.822	IT1	0.64137	8	2.40275
Trial 1	F1	P	F	0:04:43.822-0:04:44.088	IT1	0.580286	8	2.17391		Trial 1	F5	UP	F	0:04:43.822-0:04:44.088	IT1	0.838631	8	3.14174
Trial 1	F1	P	F	0:04:44.088-0:04:44.354	IT1	0.266927	8	0.999973		Trial 1	F5	UP	F	0:04:44.088-0:04:44.354	IT1	0.735134	8	2.75399
Trial 1	F1	P	F	0:04:44.354-0:04:44.620	IT1	0.476889	8	1.78654		Trial 1	F5	UP	F	0:04:44.354-0:04:44.620	IT1	0.865678	8	3.24305
Trial 1	F1	P	F	0:04:44.620-0:04:44.886	IT1	0.492408	8	1.8447		Trial 1	F5	UP	F	0:04:44.620-0:04:44.886	IT1	1.22482	8	4.58847
Trial 1	F1	P	F	0:04:44.886-0:04:45.152	IT1	0.39248	8	1.47033		Trial 1	F5	UP	F	0:04:44.886-0:04:45.152	IT1	1.58907	8	5.95305
Trial 1	F1	P	F	0:04:45.152-0:04:45.418	IT1	0.202814	7	0.868333		Trial 1	F5	UP	F	0:04:45.152-0:04:45.418	IT1	0.643298	7	2.75424
Trial 1	F1	P	F	0:04:45.418-0:04:45.684	IT1	0.327634	8	1.2274		Trial 1	F5	UP	F	0:04:45.418-0:04:45.684	IT1	1.16933	8	4.38061
Trial 1	F1	P	F	0:04:45.684-0:04:45.950	IT1	1.22783	8	4.59974		Trial 1	F5	UP	F	0:04:45.684-0:04:45.950	IT1	0.365046	8	1.36755
Trial 1	F1	P	F	0:04:45.950-0:04:46.216	IT1	1.63895	8	6.13994		Trial 1	F5	UP	F	0:04:45.950-0:04:46.216	IT1	0.383082	8	1.43513
Trial 1	F1	P	F	0:04:46.216-0:04:46.482	IT1	0.77213	8	2.89259		Trial 1	F5	UP	F	0:04:46.216-0:04:46.482	IT1	0.31989	8	1.19838
Trial 1	F1	P	F	0:04:46.482-0:04:46.748	IT1	0.446137	8	1.67134		Trial 1	F5	UP	F	0:04:46.482-0:04:46.748	IT1	0.752071	8	2.81743
Trial 1	F1	P	F	0:04:46.748-0:04:47.014	IT1	0.492763	8	1.84602		Trial 1	F5	UP	F	0:04:46.748-0:04:47.014	IT1	0.436579	8	1.63554
Trial 1	F1	P	F	0:04:47.014-0:04:47.280	IT1	0.586531	8	2.19729		Trial 1	F5	UP	F	0:04:47.014-0:04:47.280	IT1	0.426631	8	1.59826
Trial 1	F1	P	F	0:04:47.280-0:04:47.546	IT1	0.418884	8	1.56925		Trial 1	F5	UP	F	0:04:47.280-0:04:47.546	IT1	0.217369	8	0.81432
Trial 1	F1	P	F	0:04:47.546-0:04:47.812	IT1	0.473635	8	1.77435		Trial 1	F5	UP	F	0:04:47.546-0:04:47.812	IT1	0.562013	8	2.10543
Trial 1	F1	P	F	0:04:47.812-0:04:48.078	IT1	0.442705	8	1.65848		Trial 1	F5	UP	F	0:04:47.812-0:04:48.078	IT1	0.705243	8	2.64202
Trial 1	F1	P	F	0:04:48.078-0:04:48.344	IT1	1.75877	8	6.58876		Trial 1	F5	UP	F	0:04:48.078-0:04:48.344	IT1	0.341584	8	1.27967
Trial 1	F1	P	F	0:04:48.344-0:04:48.610	IT1	1.20426	8	4.51146		Trial 1	F5	UP	F	0:04:48.344-0:04:48.610	IT1	0.274744	8	1.02926
Trial 1	F1	P	F	0:04:48.610-0:04:48.876	IT1	1.30182	8	4.87694		Trial 1	F5	UP	F	0:04:48.610-0:04:48.876	IT1	0.42272	8	1.58362
Trial 1	F1	P	F	0:04:48.876-0:04:49.142	IT1	0.794115	8	2.97494		Trial 1	F5	UP	F	0:04:48.876-0:04:49.142	IT1	0.358452	8	1.34285
Trial 1	F1	P	F	0:04:49.142-0:04:49.408	IT1	0.880852	8	3.29989		Trial 1	F5	UP	F	0:04:49.142-0:04:49.408	IT1	0.182765	8	0.684682
Trial 1	F1	P	F	0:04:49.408-0:04:49.674	IT1	0.828431	8	3.10351		Trial 1	F5	UP	F	0:04:49.408-0:04:49.674	IT1	0.326065	8	1.22153
Trial 1	F1	P	F	0:04:49.674-0:04:49.940	IT1	1.08348	8	4.05897		Trial 1	F5	UP	F	0:04:49.674-0:04:49.940	IT1	0.388623	8	1.45588
Trial 1	F1	P	F	0:04:49.940-0:04:50.206	IT1	1.64332	8	6.15631		Trial 1	F5	UP	F	0:04:49.940-0:04:50.206	IT1	0.469494	8	1.75885
Trial 1	F1	P	F	0:04:50.206-0:04:50.472	IT1	2.61063	8	9.78004		Trial 1	F5	UP	F	0:04:50.206-0:04:50.472	IT1	1.22982	8	4.60717
Trial 1	F1	P	F	0:04:50.472-0:04:50.738	IT1	0.713689	8	2.67364		Trial 1	F5	UP	F	0:04:50.472-0:04:50.738	IT1	1.6635	8	6.23188
Trial 1	F1	P	F	0:04:50.738-0:04:51.004	IT1	0.81737	8	3.06209		Trial 1	F5	UP	F	0:04:50.738-0:04:51.004	IT1	0.726254	8	2.72074
Trial 1	F1	P	F	0:04:51.004-0:04:51.270	IT1	3.86167	8	14.4668		Trial 1	F5	UP	F	0:04:51.004-0:04:51.270	IT1	0.195505	8	0.732408
Trial 1	F1	P	F	0:04:51.270-0:04:51.536	IT1	2.50648	8	9.3899		Trial 1	F5	UP	F	0:04:51.270-0:04:51.536	IT1	0.230259	8	0.862614
Trial 1	F1	P	F	0:04:51.536-0:04:51.802	IT1	0.548516	8	2.05487		Trial 1	F5	UP	F	0:04:51.536-0:04:51.802	IT1	0.334984	8	1.25494
Trial 1	F1	P	F	0:04:51.802-0:04:52.068	IT1	0.29561	8	1.10743		Trial 1	F5	UP	F	0:04:51.802-0:04:52.068	IT1	0.305199	8	1.14335
Trial 1	F1	P	F	0:04:52.068-0:04:52.334	IT1	0.577345	8	2.16288		Trial 1	F5	UP	F	0:04:52.068-0:04:52.334	IT1	0.572807	8	2.14587
Trial 1	F1	P	F	0:04:52.334-0:04:52.600	IT1	0.557763	8	2.08952		Trial 1	F5	UP	F	0:04:52.334-0:04:52.600	IT1	1.06607	8	3.99376
Trial 1	F1	P	F	0:04:52.600-0:04:52.866	IT1	0.824734	8	3.08966		Trial 1	F5	UP	F	0:04:52.600-0:04:52.866	IT1	0.828382	8	3.10332
Trial 1	F1	P	F	0:04:52.866-0:04:53.132	IT1	3.53406	8	13.2395		Trial 1	F5	UP	F	0:04:52.866-0:04:53.132	IT1	0.486469	8	1.82243
Trial 1	F1	P	F	0:04:53.132-0:04:53.398	IT1	3.26808	8	12.243		Trial 1	F5	UP	F	0:04:53.132-0:04:53.398	IT1	0.413952	8	1.55076
Trial 1	F1	P	F	0:04:53.398-0:04:53.664	IT1	4.78055	8	17.9092		Trial 1	F5	UP	F	0:04:53.398-0:04:53.664	IT1	0.295854	8	1.10834
Trial 1	F1	P	F	0:04:53.664-0:04:53.930	IT1	5.51084	8	20.645		Trial 1	F5	UP	F	0:04:53.664-0:04:53.930	IT1	0.379271	8	1.42085
Trial 1	F1	P	F	0:04:53.930-0:04:54.196	IT1	3.03291	8	11.3621		Trial 1	F5	UP	F	0:04:53.930-0:04:54.196	IT1	0.51396	8	1.92543
Trial 1	F1	P	F	0:04:54.196-0:04:54.462	IT1	2.25018	8	8.42971		Trial 1	F5	UP	F	0:04:54.196-0:04:54.462	IT1	0.306131	8	1.14684
Trial 1	F1	P	F	0:04:54.462-0:04:54.728	IT1	0.592971	7	2.53876		Trial 1	F5	UP	F	0:04:54.462-0:04:54.728	IT1	0.729595	7	3.12371
Trial 1	F1	P	F	0:04:54.728-0:04:54.994	IT1	0.279106	8	1.0456		Trial 1	F5	UP	F	0:04:54.728-0:04:54.994	IT1	1.48821	8	5.57519
Trial 1	F1	P	F	0:04:54.994-0:04:55.260	IT1	0.608779	8	2.28064		Trial 1	F5	UP	F	0:04:54.994-0:04:55.260	CS2a	1.51269	8	5.66692
Trial 1	F1	P	F	0:04:55.260-0:04:55.526	IT1	0.355503	8	1.3318		Trial 1	F5	UP	F	0:04:55.260-0:04:55.526	CS2a	1.70364	8	6.38226
Trial 1	F1	P	F	0:04:55.526-0:04:55.792	IT1	0.214034	8	0.801827		Trial 1	F5	UP	F	0:04:55.526-0:04:55.792	CS2a	0.425163	8	1.59277
Trial 1	F1	P	F	0:04:55.792-0:04:56.058	IT1	0.480205	8	1.79897		Trial 1	F5	UP	F	0:04:55.792-0:04:56.058	CS2a	0.0671359	8	0.251507
Trial 1	F1	P	F	0:04:56.058-0:04:56.324	IT1	0.37752	8	1.41428		Trial 1	F5	UP	F	0:04:56.058-0:04:56.324	CS2a	0.274435	8	1.0281
Trial 1	F1	P	F	0:04:56.324-0:04:56.590	IT1	1.54466	8	5.78673		Trial 1	F5	UP	F	0:04:56.324-0:04:56.590	CS2a	0.301664	8	1.13011
Trial 1	F1	P	F	0:04:56.590-0:04:56.856	IT1	0.564592	8	2.1151		Trial 1	F5	UP	F	0:04:56.590-0:04:56.856	CS2a	0.341978	8	1.28113
Trial 1	F1	P	F	0:04:56.856-0:04:57.122	IT1	0.416588	8	1.56065		Trial 1	F5	UP	F	0:04:56.856-0:04:57.122	CS2a	0.203205	8	0.761257
Trial 1	F1	P	F	0:04:57.122-0:04:57.388	IT1	0.259924	8	0.97374		Trial 1	F5	UP	F	0:04:57.122-0:04:57.388	CS2a	0.225832	8	0.846023
Trial 1	F1	P	F	0:04:57.388-0:04:57.654	IT1	0.667071	8	2.499		Trial 1	F5	UP	F	0:04:57.388-0:04:57.654	CS2a	0.165504	8	0.620021
Trial 1	F1	P	F	0:04:57.654-0:04:57.920	IT1	1.68688	8	6.31951		Trial 1	F5	UP	F	0:04:57.654-0:04:57.920	CS2a	0.0688849	8	0.258059
Trial 1	F1	P	F	0:04:57.920-0:04:58.186	IT1	0.810145	8	3.03499		Trial 1	F5	UP	F	0:04:57.920-0:04:58.186	CS2a	0.0933575	8	0.349741
Trial 1	F1	P	F	0:04:58.186-0:04:58.452	IT1	1.88563	8	7.06408		Trial 1	F5	UP	F	0:04:58.186-0:04:58.452	CS2a	0.01679	8	0.0628999
Trial 1	F1	P	F	0:04:58.452-0:04:58.718	IT1	0.727677	8	2.72605		Trial 1	F5	UP	F	0:04:58.452-0:04:58.718	CS2a	0.0773429	8	0.289746
Trial 1	F1	P	F	0:04:58.718-0:04:58.984	IT1	0.503567	8	1.88649		Trial 1	F5	UP	F	0:04:58.718-0:04:58.984	CS2a	0.240151	8	0.899666
Trial 1	F1	P	F	0:04:58.984-0:04:59.250	IT1	0.118004	8	0.442075		Trial 1	F5	UP	F	0:04:58.984-0:04:59.250	CS2a	0.136419	8	0.51106
Trial 1	F1	P	F	0:04:59.250-0:04:59.516	IT1	0.412798	8	1.54644		Trial 1	F5	UP	F	0:04:59.250-0:04:59.516	CS2a	0.158112	8	0.592326
Trial 1	F1	P	F	0:04:59.516-0:04:59.782	IT1	0.805853	8	3.01892		Trial 1	F5	UP	F	0:04:59.516-0:04:59.782	CS2a	0.267511	8	1.00216
Trial 1	F1	P	F	0:04:59.782-0:05:00.048	IT1	0.664594	8	2.48973		Trial 1	F5	UP	F	0:04:59.782-0:05:00.048	CS2a	0.185102	8	0.693435
Trial 1	F1	P	F	0:05:00.048-0:05:00.314	IT1	0.528201	8	1.97876		Trial 1	F5	UP	F	0:05:00.048-0:05:00.314	CS2a	0.124007	8	0.464561
Trial 1	F1	P	F	0:05:00.314-0:05:00.580	IT1	0.54377	8	2.0371		Trial 1	F5	UP	F	0:05:00.314-0:05:00.580	CS2a	0.0670737	8	0.251277
Trial 1	F1	P	F	0:05:00.580-0:05:00.846	IT1	0.334023	8	1.25133		Trial 1	F5	UP	F	0:05:00.580-0:05:00.846	CS2a	0.0533723	8	0.199945
Trial 1	F1	P	F	0:05:00.846-0:05:01.112	IT1	0.668907	8	2.50589		Trial 1	F5	UP	F	0:05:00.846-0:05:01.112	CS2a	0.073881	8	0.276777
Trial 1	F1	P	F	0:05:01.112-0:05:01.378	IT1	0.225581	8	0.845081		Trial 1	F5	UP	F	0:05:01.112-0:05:01.378	CS2a	0.0667098	8	0.249912
Trial 1	F1	P	F	0:05:01.378-0:05:01.644	IT1	0.334008	8	1.25127		Trial 1	F5	UP	F	0:05:01.378-0:05:01.644	CS2a	0.0773208	8	0.289662
Trial 1	F1	P	F	0:05:01.644-0:05:01.910	IT1	0.514613	8	1.92787		Trial 1	F5	UP	F	0:05:01.644-0:05:01.910	CS2a	0.126976	8	0.475687
Trial 1	F1	P	F	0:05:01.910-0:05:02.176	IT1	0.187567	8	0.702671		Trial 1	F5	UP	F	0:05:01.910-0:05:02.176	CS2a	0.182558	8	0.683908
Trial 1	F1	P	F	0:05:02.176-0:05:02.442	IT1	0.135408	8	0.507275		Trial 1	F5	UP	F	0:05:02.176-0:05:02.442	CS2a	0.0932256	8	0.349247
Trial 1	F1	P	F	0:05:02.442-0:05:02.708	IT1	0.25807	8	0.9668		Trial 1	F5	UP	F	0:05:02.442-0:05:02.708	CS2a	0.0603438	8	0.226062
Trial 1	F1	P	F	0:05:02.708-0:05:02.974	IT1	0.963145	8	3.60819		Trial 1	F5	UP	F	0:05:02.708-0:05:02.974	CS2a	0.0713484	8	0.267288
Trial 1	F1	P	F	0:05:02.974-0:05:03.240	IT1	0.442448	8	1.65752		Trial 1	F5	UP	F	0:05:02.974-0:05:03.240	CS2a	0.0591357	8	0.221539
Trial 1	F1	P	F	0:05:03.240-0:05:03.506	IT1	0.538958	8	2.01907		Trial 1	F5	UP	F	0:05:03.240-0:05:03.506	CS2a	0.0734563	8	0.275184
Trial 1	F1	P	F	0:05:03.506-0:05:03.772	IT1	1.03193	8	3.86587		Trial 1	F5	UP	F	0:05:03.506-0:05:03.772	CS2a	0.0177817	8	0.066615
Trial 1	F1	P	F	0:05:03.772-0:05:04.038	IT1	0.422458	8	1.58263		Trial 1	F5	UP	F	0:05:03.772-0:05:04.038	CS2a	0.0389048	8	0.145747
Trial 1	F1	P	F	0:05:04.038-0:05:04.304	IT1	0.167776	7	0.718319		Trial 1	F5	UP	F	0:05:04.038-0:05:04.304	CS2a	0.0723697	7	0.309848
Trial 1	F1	P	F	0:05:04.304-0:05:04.570	IT1	0.118739	8	0.444824		Trial 1	F5	UP	F	0:05:04.304-0:05:04.570	CS2a	0.198993	8	0.745477
Trial 1	F1	P	F	0:05:04.570-0:05:04.836	IT1	0.16633	8	0.623112		Trial 1	F5	UP	F	0:05:04.570-0:05:04.836	CS2a	0.0788223	8	0.295288
Trial 1	F1	P	F	0:05:04.836-0:05:05.102	IT1	0.283496	8	1.06204		Trial 1	F5	UP	F	0:05:04.836-0:05:05.102	CS2a	0.111419	8	0.4174
Trial 1	F1	P	F	0:05:05.102-0:05:05.368	IT1	0.877342	8	3.28674		Trial 1	F5	UP	F	0:05:05.102-0:05:05.368	IT2	0.0640924	8	0.240105
Trial 1	F1	P	F	0:05:05.368-0:05:05.634	IT1	1.3792	8	5.16683		Trial 1	F5	UP	F	0:05:05.368-0:05:05.634	IT2	0.0344884	8	0.129202
Trial 1	F1	P	F	0:05:05.634-0:05:05.900	IT1	0.699528	8	2.62062		Trial 1	F5	UP	F	0:05:05.634-0:05:05.900	IT2	0.0550203	8	0.206122
Trial 1	F1	P	F	0:05:05.900-0:05:06.166	IT1	0.711154	8	2.66416		Trial 1	F5	UP	F	0:05:05.900-0:05:06.166	IT2	0.0580708	8	0.217548
Trial 1	F1	P	F	0:05:06.166-0:05:06.432	IT1	0.779483	8	2.92013		Trial 1	F5	UP	F	0:05:06.166-0:05:06.432	IT2	0.0430447	8	0.161256
Trial 1	F1	P	F	0:05:06.432-0:05:06.698	IT1	0.499547	8	1.87143		Trial 1	F5	UP	F	0:05:06.432-0:05:06.698	IT2	0.0464235	8	0.173914
Trial 1	F1	P	F	0:05:06.698-0:05:06.964	IT1	0.426941	8	1.59942		Trial 1	F5	UP	F	0:05:06.698-0:05:06.964	IT2	0.0589154	8	0.220711
Trial 1	F1	P	F	0:05:06.964-0:05:07.230	IT1	0.485654	8	1.81939		Trial 1	F5	UP	F	0:05:06.964-0:05:07.230	IT2	0.0461523	8	0.172898
Trial 1	F1	P	F	0:05:07.230-0:05:07.496	IT1	0.566281	8	2.12142		Trial 1	F5	UP	F	0:05:07.230-0:05:07.496	IT2	0.105018	8	0.393424
Trial 1	F1	P	F	0:05:07.496-0:05:07.762	IT1	0.801224	8	3.00158		Trial 1	F5	UP	F	0:05:07.496-0:05:07.762	IT2	0.201196	8	0.753733
Trial 1	F1	P	F	0:05:07.762-0:05:08.028	IT1	1.26714	8	4.74704		Trial 1	F5	UP	F	0:05:07.762-0:05:08.028	IT2	0.168352	8	0.630687
Trial 1	F1	P	F	0:05:08.028-0:05:08.294	IT1	0.574986	8	2.15404		Trial 1	F5	UP	F	0:05:08.028-0:05:08.294	IT2	0.0939614	8	0.352002
Trial 1	F1	P	F	0:05:08.294-0:05:08.560	IT1	0.322477	8	1.20808		Trial 1	F5	UP	F	0:05:08.294-0:05:08.560	IT2	0.0449304	8	0.168321
Trial 1	F1	P	F	0:05:08.560-0:05:08.826	IT1	0.371969	8	1.39349		Trial 1	F5	UP	F	0:05:08.560-0:05:08.826	IT2	0.0292333	8	0.109515
Trial 1	F1	P	F	0:05:08.826-0:05:09.092	IT1	0.317965	8	1.19117		Trial 1	F5	UP	F	0:05:08.826-0:05:09.092	IT2	0.0507884	8	0.190265
Trial 1	F1	P	F	0:05:09.092-0:05:09.358	IT1	1.27673	8	4.78296		Trial 1	F5	UP	F	0:05:09.092-0:05:09.358	IT2	0.526885	8	1.97384
Trial 1	F1	P	F	0:05:09.358-0:05:09.624	IT1	2.06967	8	7.75349		Trial 1	F5	UP	F	0:05:09.358-0:05:09.624	IT2	0.127447	8	0.477448
Trial 1	F1	P	F	0:05:09.624-0:05:09.890	IT1	4.3993	8	16.4809		Trial 1	F5	UP	F	0:05:09.624-0:05:09.890	IT2	0.112706	8	0.422225
Trial 1	F1	P	F	0:05:09.890-0:05:10.156	IT1	5.52252	8	20.6887		Trial 1	F5	UP	F	0:05:09.890-0:05:10.156	IT2	0.24993	8	0.936302
Trial 1	F1	P	F	0:05:10.156-0:05:10.422	IT1	4.29077	8	16.0743		Trial 1	F5	UP	F	0:05:10.156-0:05:10.422	IT2	0.408542	8	1.5305
Trial 1	F1	P	F	0:05:10.422-0:05:10.688	IT1	1.24711	8	4.67201		Trial 1	F5	UP	F	0:05:10.422-0:05:10.688	IT2	0.152075	8	0.569715
Trial 1	F1	P	F	0:05:10.688-0:05:10.954	IT1	0.465188	8	1.74271		Trial 1	F5	UP	F	0:05:10.688-0:05:10.954	IT2	0.0501088	8	0.187719
Trial 1	F1	P	F	0:05:10.954-0:05:11.220	IT1	0.212948	8	0.797759		Trial 1	F5	UP	F	0:05:10.954-0:05:11.220	IT2	0.0563179	8	0.210981
Trial 1	F1	P	F	0:05:11.220-0:05:11.486	IT1	0.160382	8	0.600829		Trial 1	F5	UP	F	0:05:11.220-0:05:11.486	IT2	0.230265	8	0.862631
Trial 1	F1	P	F	0:05:11.486-0:05:11.752	IT1	0.196755	8	0.737093		Trial 1	F5	UP	F	0:05:11.486-0:05:11.752	IT2	0.47938	8	1.79588
Trial 1	F1	P	F	0:05:11.752-0:05:12.018	IT1	0.138653	8	0.519431		Trial 1	F5	UP	F	0:05:11.752-0:05:12.018	IT2	1.02491	8	3.83958
Trial 1	F1	P	F	0:05:12.018-0:05:12.284	IT1	0.200017	8	0.749315		Trial 1	F5	UP	F	0:05:12.018-0:05:12.284	IT2	1.91875	8	7.1881
Trial 1	F1	P	F	0:05:12.284-0:05:12.550	IT1	0.275161	8	1.03082		Trial 1	F5	UP	F	0:05:12.284-0:05:12.550	IT2	1.90748	8	7.14592
Trial 1	F1	P	F	0:05:12.550-0:05:12.816	IT1	0.170024	8	0.636951		Trial 1	F5	UP	F	0:05:12.550-0:05:12.816	IT2	0.512572	8	1.92022
Trial 1	F1	P	F	0:05:12.816-0:05:13.082	IT1	0.221934	8	0.831416		Trial 1	F5	UP	F	0:05:12.816-0:05:13.082	IT2	0.395786	8	1.48271
Trial 1	F1	P	F	0:05:13.082-0:05:13.348	IT1	0.109871	8	0.411604		Trial 1	F5	UP	F	0:05:13.082-0:05:13.348	IT2	0.259033	8	0.970407
Trial 1	F1	P	F	0:05:13.348-0:05:13.614	IT1	0.401684	8	1.50481		Trial 1	F5	UP	F	0:05:13.348-0:05:13.614	IT2	0.335148	8	1.25555
Trial 1	F1	P	F	0:05:13.614-0:05:13.880	IT1	0.886217	7	3.79431		Trial 1	F5	UP	F	0:05:13.614-0:05:13.880	IT2	0.214261	7	0.917344
Trial 1	F1	P	F	0:05:13.880-0:05:14.146	IT1	0.882677	8	3.30675		Trial 1	F5	UP	F	0:05:13.880-0:05:14.146	IT2	0.158686	8	0.594479
Trial 1	F1	P	F	0:05:14.146-0:05:14.412	IT1	0.617997	8	2.31517		Trial 1	F5	UP	F	0:05:14.146-0:05:14.412	IT2	0.0881908	8	0.330384
Trial 1	F1	P	F	0:05:14.412-0:05:14.678	IT1	0.390693	8	1.46363		Trial 1	F5	UP	F	0:05:14.412-0:05:14.678	IT2	0.0680391	8	0.254892
Trial 1	F1	P	F	0:05:14.678-0:05:14.944	IT1	0.210782	8	0.789641		Trial 1	F5	UP	F	0:05:14.678-0:05:14.944	IT2	0.137757	8	0.516075
Trial 1	F1	P	F	0:05:14.944-0:05:15.210	IT1	0.271149	8	1.01579		Trial 1	F5	UP	F	0:05:14.944-0:05:15.210	IT2	0.131466	8	0.492502
Trial 1	F1	P	F	0:05:15.210-0:05:15.476	IT1	0.980283	8	3.67239		Trial 1	F5	UP	F	0:05:15.210-0:05:15.476	IT2	0.265909	8	0.996163
Trial 1	F1	P	F	0:05:15.476-0:05:15.742	IT1	0.623571	8	2.33605		Trial 1	F5	UP	F	0:05:15.476-0:05:15.742	IT2	0.170599	8	0.639106
Trial 1	F1	P	F	0:05:15.742-0:05:16.008	IT1	0.501349	8	1.87817		Trial 1	F5	UP	F	0:05:15.742-0:05:16.008	IT2	0.301451	8	1.12931
Trial 1	F1	P	F	0:05:16.008-0:05:16.274	IT1	0.80438	8	3.01341		Trial 1	F5	UP	F	0:05:16.008-0:05:16.274	IT2	0.565155	8	2.11721
Trial 1	F1	P	F	0:05:16.274-0:05:16.540	IT1	1.01082	8	3.78677		Trial 1	F5	UP	F	0:05:16.274-0:05:16.540	IT2	0.967263	8	3.6236
Trial 1	F1	P	F	0:05:16.540-0:05:16.806	IT1	0.359857	8	1.34812		Trial 1	F5	UP	F	0:05:16.540-0:05:16.806	IT2	1.16823	8	4.37649
Trial 1	F1	P	F	0:05:16.806-0:05:17.072	IT1	0.343544	8	1.287		Trial 1	F5	UP	F	0:05:16.806-0:05:17.072	IT2	1.02649	8	3.84546
Trial 1	F1	P	F	0:05:17.072-0:05:17.338	IT1	0.184084	8	0.689627		Trial 1	F5	UP	F	0:05:17.072-0:05:17.338	IT2	0.394449	8	1.4777
Trial 1	F1	P	F	0:05:17.338-0:05:17.604	IT1	0.43204	8	1.61853		Trial 1	F5	UP	F	0:05:17.338-0:05:17.604	IT2	0.259052	8	0.970478
Trial 1	F1	P	F	0:05:17.604-0:05:17.870	IT1	0.284518	8	1.06588		Trial 1	F5	UP	F	0:05:17.604-0:05:17.870	IT2	0.195647	8	0.732938
Trial 1	F1	P	F	0:05:17.870-0:05:18.136	IT1	0.269519	8	1.00969		Trial 1	F5	UP	F	0:05:17.870-0:05:18.136	IT2	0.0826514	8	0.309635
Trial 1	F1	P	F	0:05:18.136-0:05:18.402	IT1	0.193554	8	0.7251		Trial 1	F5	UP	F	0:05:18.136-0:05:18.402	IT2	0.353161	8	1.32302
Trial 1	F1	P	F	0:05:18.402-0:05:18.668	IT1	0.0320473	8	0.120056		Trial 1	F5	UP	F	0:05:18.402-0:05:18.668	IT2	0.264533	8	0.991004
Trial 1	F1	P	F	0:05:18.668-0:05:18.934	IT1	0.0734233	8	0.275064		Trial 1	F5	UP	F	0:05:18.668-0:05:18.934	IT2	2.51583	8	9.42494
Trial 1	F1	P	F	0:05:18.934-0:05:19.200	IT1	0.462446	8	1.73243		Trial 1	F5	UP	F	0:05:18.934-0:05:19.200	IT2	2.17947	8	8.16482
Trial 1	F1	P	F	0:05:19.200-0:05:19.466	IT1	0.977616	8	3.6624		Trial 1	F5	UP	F	0:05:19.200-0:05:19.466	IT2	0.926772	8	3.47192
Trial 1	F1	P	F	0:05:19.466-0:05:19.732	IT1	1.24663	8	4.6702		Trial 1	F5	UP	F	0:05:19.466-0:05:19.732	IT2	1.3679	8	5.1245
Trial 1	F1	P	F	0:05:19.732-0:05:19.998	IT1	1.85612	8	6.9535		Trial 1	F5	UP	F	0:05:19.732-0:05:19.998	IT2	3.1371	8	11.7523
Trial 1	F1	P	F	0:05:19.998-0:05:20.264	IT1	0.931529	8	3.48974		Trial 1	F5	UP	F	0:05:19.998-0:05:20.264	IT2	2.10561	8	7.88815
Trial 1	F1	P	F	0:05:20.264-0:05:20.530	IT1	1.22716	8	4.59724		Trial 1	F5	UP	F	0:05:20.264-0:05:20.530	IT2	0.825097	8	3.09102
Trial 1	F1	P	F	0:05:20.530-0:05:20.796	IT1	2.97169	8	11.1327		Trial 1	F5	UP	F	0:05:20.530-0:05:20.796	IT2	0.493836	8	1.85004
Trial 1	F1	P	F	0:05:20.796-0:05:21.062	IT1	3.13524	8	11.7454		Trial 1	F5	UP	F	0:05:20.796-0:05:21.062	IT2	0.511227	8	1.91518
Trial 1	F1	P	F	0:05:21.062-0:05:21.328	IT1	3.14335	8	11.7758		Trial 1	F5	UP	F	0:05:21.062-0:05:21.328	IT2	0.945388	8	3.54165
Trial 1	F1	P	F	0:05:21.328-0:05:21.594	IT1	2.95665	8	11.0763		Trial 1	F5	UP	F	0:05:21.328-0:05:21.594	IT2	0.458636	8	1.71817
Trial 1	F1	P	F	0:05:21.594-0:05:21.860	IT1	2.70934	8	10.1498		Trial 1	F5	UP	F	0:05:21.594-0:05:21.860	IT2	0.100901	8	0.377999
Trial 1	F1	P	F	0:05:21.860-0:05:22.126	IT1	1.96992	8	7.37985		Trial 1	F5	UP	F	0:05:21.860-0:05:22.126	IT2	2.08983	8	7.82904
Trial 1	F1	P	F	0:05:22.126-0:05:22.392	IT1	0.407648	8	1.52714		Trial 1	F5	UP	F	0:05:22.126-0:05:22.392	IT2	1.17261	8	4.39289
Trial 1	F1	P	F	0:05:22.392-0:05:22.658	IT1	0.612364	8	2.29405		Trial 1	F5	UP	F	0:05:22.392-0:05:22.658	IT2	0.762184	8	2.85533
Trial 1	F1	P	F	0:05:22.658-0:05:22.924	IT1	0.527133	8	1.97478		Trial 1	F5	UP	F	0:05:22.658-0:05:22.924	IT2	0.632381	8	2.36905
Trial 1	F1	P	F	0:05:22.924-0:05:23.190	IT1	0.623989	8	2.33762		Trial 1	F5	UP	F	0:05:22.924-0:05:23.190	IT2	0.894389	8	3.3506
Trial 1	F1	P	F	0:05:23.190-0:05:23.456	IT1	0.221344	7	0.947666		Trial 1	F5	UP	F	0:05:23.190-0:05:23.456	IT2	0.312738	7	1.33897
Trial 1	F1	P	F	0:05:23.456-0:05:23.722	IT1	0.466493	8	1.7476		Trial 1	F5	UP	F	0:05:23.456-0:05:23.722	IT2	0.394648	8	1.47846
Trial 1	F1	P	F	0:05:23.722-0:05:23.988	IT1	0.376462	8	1.41031		Trial 1	F5	UP	F	0:05:23.722-0:05:23.988	IT2	0.728904	8	2.73065
Trial 1	F1	P	F	0:05:23.988-0:05:24.254	IT1	0.893011	8	3.34545		Trial 1	F5	UP	F	0:05:23.988-0:05:24.254	IT2	0.712102	8	2.66772
Trial 1	F1	P	F	0:05:24.254-0:05:24.520	IT1	1.63115	8	6.11069		Trial 1	F5	UP	F	0:05:24.254-0:05:24.520	IT2	1.53951	8	5.7674
Trial 1	F1	P	F	0:05:24.520-0:05:24.786	IT1	0.948536	8	3.55344		Trial 1	F5	UP	F	0:05:24.520-0:05:24.786	IT2	0.757915	8	2.83934
Trial 1	F1	P	F	0:05:24.786-0:05:25.052	IT1	0.253909	8	0.951211		Trial 1	F5	UP	F	0:05:24.786-0:05:25.052	IT2	0.541715	8	2.0294
Trial 1	F1	P	F	0:05:25.052-0:05:25.318	IT1	0.211666	8	0.792953		Trial 1	F5	UP	F	0:05:25.052-0:05:25.318	IT2	0.962814	8	3.60693
Trial 1	F1	P	F	0:05:25.318-0:05:25.584	IT1	0.155111	8	0.581082		Trial 1	F5	UP	F	0:05:25.318-0:05:25.584	IT2	0.750762	8	2.81254
Trial 1	F1	P	F	0:05:25.584-0:05:25.850	IT1	0.18967	8	0.71055		Trial 1	F5	UP	F	0:05:25.584-0:05:25.850	IT2	0.698468	8	2.61663
Trial 1	F1	P	F	0:05:25.850-0:05:26.116	IT1	0.241868	8	0.9061		Trial 1	F5	UP	F	0:05:25.850-0:05:26.116	IT2	0.681428	8	2.5528
Trial 1	F1	P	F	0:05:26.116-0:05:26.382	IT1	0.312956	8	1.17241		Trial 1	F5	UP	F	0:05:26.116-0:05:26.382	IT2	1.26045	8	4.72196
Trial 1	F1	P	F	0:05:26.382-0:05:26.648	IT1	0.184921	8	0.69276		Trial 1	F5	UP	F	0:05:26.382-0:05:26.648	IT2	0.664945	8	2.49104
Trial 1	F1	P	F	0:05:26.648-0:05:26.914	IT1	0.428916	8	1.60683		Trial 1	F5	UP	F	0:05:26.648-0:05:26.914	IT2	1.38213	8	5.17783
Trial 1	F1	P	F	0:05:26.914-0:05:27.180	IT1	0.872124	8	3.2672		Trial 1	F5	UP	F	0:05:26.914-0:05:27.180	IT2	3.11389	8	11.6654
Trial 1	F1	P	F	0:05:27.180-0:05:27.446	IT1	1.1395	8	4.26883		Trial 1	F5	UP	F	0:05:27.180-0:05:27.446	IT2	2.29746	8	8.6069
Trial 1	F1	P	F	0:05:27.446-0:05:27.712	IT1	0.288325	8	1.08014		Trial 1	F5	UP	F	0:05:27.446-0:05:27.712	IT2	2.93228	8	10.985
Trial 1	F1	P	F	0:05:27.712-0:05:27.978	IT1	0.204912	8	0.76765		Trial 1	F5	UP	F	0:05:27.712-0:05:27.978	IT2	3.49527	8	13.0941
Trial 1	F1	P	F	0:05:27.978-0:05:28.244	IT1	0.170041	8	0.637017		Trial 1	F5	UP	F	0:05:27.978-0:05:28.244	IT2	0.617651	8	2.31389
Trial 1	F1	P	F	0:05:28.244-0:05:28.510	IT1	0.141596	8	0.530451		Trial 1	F5	UP	F	0:05:28.244-0:05:28.510	IT2	1.19202	8	4.46559
Trial 1	F1	P	F	0:05:28.510-0:05:28.776	IT1	0.203035	8	0.760616		Trial 1	F5	UP	F	0:05:28.510-0:05:28.776	IT2	1.74023	8	6.51932
Trial 1	F1	P	F	0:05:28.776-0:05:29.042	IT1	0.256444	8	0.960703		Trial 1	F5	UP	F	0:05:28.776-0:05:29.042	IT2	1.60544	8	6.01439
Trial 1	F1	P	F	0:05:29.042-0:05:29.308	IT1	0.389394	8	1.45877		Trial 1	F5	UP	F	0:05:29.042-0:05:29.308	IT2	1.21569	8	4.55425
Trial 1	F1	P	F	0:05:29.308-0:05:29.574	IT1	0.408688	8	1.53105		Trial 1	F5	UP	F	0:05:29.308-0:05:29.574	IT2	22.9706	8	86.0534
Trial 1	F1	P	F	0:05:29.574-0:05:29.840	IT1	0.840953	8	3.15042		Trial 1	F5	UP	F	0:05:29.574-0:05:29.840	IT2	0.255985	8	0.958981
Trial 1	F1	P	F	0:05:29.840-0:05:30.106	IT1	1.34722	8	5.04701		Trial 1	F5	UP	F	0:05:29.840-0:05:30.106	IT2	0.255985	8	0.958981
Trial 1	F1	P	F	0:05:30.106-0:05:30.372	IT1	0.869911	8	3.25891		Trial 1	F5	UP	F	0:05:30.106-0:05:30.372	IT2	0.255985	8	0.958985
Trial 1	F1	P	F	0:05:30.372-0:05:30.638	IT1	0.166613	8	0.62417		Trial 1	F5	UP	F	0:05:30.372-0:05:30.638	IT2	0.618859	8	2.3184
Trial 1	F1	P	F	0:05:30.638-0:05:30.904	IT1	0.264628	8	0.991365		Trial 1	F5	UP	F	0:05:30.638-0:05:30.904	IT2	1.17412	8	4.39854
Trial 1	F1	P	F	0:05:30.904-0:05:31.170	IT1	0.265486	8	0.994575		Trial 1	F5	UP	F	0:05:30.904-0:05:31.170	IT2	3.50656	8	13.1364
Trial 1	F1	P	F	0:05:31.170-0:05:31.436	IT1	0.139923	8	0.524185		Trial 1	F5	UP	F	0:05:31.170-0:05:31.436	IT2	2.92797	8	10.9689
Trial 1	F1	P	F	0:05:31.436-0:05:31.702	IT1	2.53188	8	9.48505		Trial 1	F5	UP	F	0:05:31.436-0:05:31.702	IT2	1.21158	8	4.5389
Trial 1	F1	P	F	0:05:31.702-0:05:31.968	IT1	0.827674	8	3.10067		Trial 1	F5	UP	F	0:05:31.702-0:05:31.968	IT2	1.34766	8	5.04867
Trial 1	F1	P	F	0:05:31.968-0:05:32.234	IT1	0.91577	8	3.43071		Trial 1	F5	UP	F	0:05:31.968-0:05:32.234	IT2	2.24094	8	8.39513
Trial 1	F1	P	F	0:05:32.234-0:05:32.500	IT1	0.379381	8	1.42125		Trial 1	F5	UP	F	0:05:32.234-0:05:32.500	IT2	1.24641	8	4.66933
Trial 1	F1	P	F	0:05:32.500-0:05:32.766	IT1	0.213191	7	0.912762		Trial 1	F5	UP	F	0:05:32.500-0:05:32.766	IT2	1.21467	7	5.20056
Trial 1	F1	P	F	0:05:32.766-0:05:33.032	IT1	0.117281	8	0.439365		Trial 1	F5	UP	F	0:05:32.766-0:05:33.032	IT2	0.62486	8	2.34089
Trial 1	F1	P	F	0:05:33.032-0:05:33.298	IT1	0.0614337	8	0.230147		Trial 1	F5	UP	F	0:05:33.032-0:05:33.298	IT2	0.403554	8	1.51182
Trial 1	F1	P	F	0:05:33.298-0:05:33.564	IT1	0.11039	8	0.413548		Trial 1	F5	UP	F	0:05:33.298-0:05:33.564	IT2	0.547775	8	2.0521
Trial 1	F1	P	F	0:05:33.564-0:05:33.830	IT1	0.0563781	8	0.211207		Trial 1	F5	UP	F	0:05:33.564-0:05:33.830	IT2	0.531208	8	1.99005
Trial 1	F1	P	F	0:05:33.830-0:05:34.096	IT1	0.240812	8	0.902138		Trial 1	F5	UP	F	0:05:33.830-0:05:34.096	IT2	0.795954	8	2.98184
Trial 1	F1	P	F	0:05:34.096-0:05:34.362	IT1	0.950599	8	3.56117		Trial 1	F5	UP	F	0:05:34.096-0:05:34.362	IT2	1.45049	8	5.43389
Trial 1	F1	P	F	0:05:34.362-0:05:34.628	IT1	0.564803	8	2.1159		Trial 1	F5	UP	F	0:05:34.362-0:05:34.628	IT2	1.54542	8	5.78955
Trial 1	F1	P	F	0:05:34.628-0:05:34.894	IT1	0.542966	8	2.03409		Trial 1	F5	UP	F	0:05:34.628-0:05:34.894	IT2	0.905967	8	3.39398
Trial 1	F1	P	F	0:05:34.894-0:05:35.160	IT1	0.226913	8	0.850077		Trial 1	F5	UP	F	0:05:34.894-0:05:35.160	IT2	0.736483	8	2.75905
Trial 1	F1	P	F	0:05:35.160-0:05:35.426	IT1	0.244937	8	0.917591		Trial 1	F5	UP	F	0:05:35.160-0:05:35.426	IT2	1.41926	8	5.31692
Trial 1	F1	P	F	0:05:35.426-0:05:35.692	IT1	0.243947	8	0.913887		Trial 1	F5	UP	F	0:05:35.426-0:05:35.692	IT2	3.63094	8	13.6024
Trial 1	F1	P	F	0:05:35.692-0:05:35.958	IT1	0.181367	8	0.679448		Trial 1	F5	UP	F	0:05:35.692-0:05:35.958	IT2	4.14608	8	15.5323
Trial 1	F1	P	F	0:05:35.958-0:05:36.224	IT1	0.16712	8	0.626072		Trial 1	F5	UP	F	0:05:35.958-0:05:36.224	IT2	1.26642	8	4.74432
Trial 1	F1	P	F	0:05:36.224-0:05:36.490	IT1	0.250386	8	0.938007		Trial 1	F5	UP	F	0:05:36.224-0:05:36.490	IT2	0.446378	8	1.67224
Trial 1	F1	P	F	0:05:36.490-0:05:36.756	IT1	0.386581	8	1.44823		Trial 1	F5	UP	F	0:05:36.490-0:05:36.756	IT2	0.479496	8	1.79632
Trial 1	F1	P	F	0:05:36.756-0:05:37.022	IT1	1.01007	8	3.78398		Trial 1	F5	UP	F	0:05:36.756-0:05:37.022	IT2	1.87702	8	7.03177
Trial 1	F1	P	F	0:05:37.022-0:05:37.288	IT1	1.32981	8	4.98183		Trial 1	F5	UP	F	0:05:37.022-0:05:37.288	IT2	2.85189	8	10.6839
Trial 1	F1	P	F	0:05:37.288-0:05:37.554	IT1	2.10432	8	7.8833		Trial 1	F5	UP	F	0:05:37.288-0:05:37.554	IT2	3.79787	8	14.2277
Trial 1	F1	P	F	0:05:37.554-0:05:37.820	IT1	1.22069	8	4.57302		Trial 1	F5	UP	F	0:05:37.554-0:05:37.820	IT2	0.856622	8	3.20913
Trial 1	F1	P	F	0:05:37.820-0:05:38.086	IT1	1.12943	8	4.23113		Trial 1	F5	UP	F	0:05:37.820-0:05:38.086	IT2	0.369098	8	1.38274
Trial 1	F1	P	F	0:05:38.086-0:05:38.352	IT1	0.436252	8	1.6343		Trial 1	F5	UP	F	0:05:38.086-0:05:38.352	IT2	0.208057	8	0.779433
Trial 1	F1	P	F	0:05:38.352-0:05:38.618	IT1	0.100835	8	0.377753		Trial 1	F5	UP	F	0:05:38.352-0:05:38.618	IT2	0.316959	8	1.18741
Trial 1	F1	P	F	0:05:38.618-0:05:38.884	IT1	0.560404	8	2.09942		Trial 1	F5	UP	F	0:05:38.618-0:05:38.884	IT2	0.217267	8	0.81394
Trial 1	F1	P	F	0:05:38.884-0:05:39.150	IT1	0.210011	8	0.786753		Trial 1	F5	UP	F	0:05:38.884-0:05:39.150	IT2	0.116624	8	0.436904
Trial 1	F1	P	F	0:05:39.150-0:05:39.416	IT1	0.147587	8	0.552898		Trial 1	F5	UP	F	0:05:39.150-0:05:39.416	IT2	0.417144	8	1.56272
Trial 1	F1	P	F	0:05:39.416-0:05:39.682	IT1	0.276157	8	1.03455		Trial 1	F5	UP	F	0:05:39.416-0:05:39.682	IT2	1.04776	8	3.92514
Trial 1	F1	P	F	0:05:39.682-0:05:39.948	IT1	0.209699	8	0.785584		Trial 1	F5	UP	F	0:05:39.682-0:05:39.948	IT2	1.96584	8	7.36456
Trial 1	F1	P	F	0:05:39.948-0:05:40.214	IT1	0.202109	8	0.757152		Trial 1	F5	UP	F	0:05:39.948-0:05:40.214	IT2	0.611768	8	2.29183
Trial 1	F1	P	F	0:05:40.214-0:05:40.480	IT1	0.681394	8	2.55267		Trial 1	F5	UP	F	0:05:40.214-0:05:40.480	IT2	0.633486	8	2.37319
Trial 1	F1	P	F	0:05:40.480-0:05:40.746	IT1	0.213197	8	0.798689		Trial 1	F5	UP	F	0:05:40.480-0:05:40.746	IT2	0.464194	8	1.73898
Trial 1	F1	P	F	0:05:40.746-0:05:41.012	IT1	0.237644	8	0.89028		Trial 1	F5	UP	F	0:05:40.746-0:05:41.012	IT2	0.726673	8	2.72229
Trial 1	F1	P	F	0:05:41.012-0:05:41.278	IT1	0.305876	8	1.14589		Trial 1	F5	UP	F	0:05:41.012-0:05:41.278	IT2	0.438122	8	1.64132
Trial 1	F1	P	F	0:05:41.278-0:05:41.544	IT1	0.530224	8	1.98635		Trial 1	F5	UP	F	0:05:41.278-0:05:41.544	IT2	0.100128	8	0.375107
Trial 1	F1	P	F	0:05:41.544-0:05:41.810	IT1	0.297957	8	1.11622		Trial 1	F5	UP	F	0:05:41.544-0:05:41.810	IT2	0.170132	8	0.63736
Trial 1	F1	P	F	0:05:41.810-0:05:42.076	IT1	0.220351	8	0.825489		Trial 1	F5	UP	F	0:05:41.810-0:05:42.076	IT2	0.273232	8	1.0236
Trial 1	F1	P	F	0:05:42.076-0:05:42.342	IT1	0.0587988	7	0.251742		Trial 1	F5	UP	F	0:05:42.076-0:05:42.342	IT2	0.196126	7	0.839701
Trial 1	F1	P	F	0:05:42.342-0:05:42.608	IT1	0.261135	8	0.978274		Trial 1	F5	UP	F	0:05:42.342-0:05:42.608	IT2	0.214474	8	0.803474
Trial 1	F1	P	F	0:05:42.608-0:05:42.874	IT1	0.103951	8	0.389425		Trial 1	F5	UP	F	0:05:42.608-0:05:42.874	IT2	0.506586	8	1.89779
Trial 1	F1	P	F	0:05:42.874-0:05:43.140	IT1	0.291785	8	1.0931		Trial 1	F5	UP	F	0:05:42.874-0:05:43.140	IT2	0.470439	8	1.76238
Trial 1	F1	P	F	0:05:43.140-0:05:43.406	IT1	0.207661	8	0.77795		Trial 1	F5	UP	F	0:05:43.140-0:05:43.406	IT2	0.188923	8	0.70775
Trial 1	F1	P	F	0:05:43.406-0:05:43.672	IT1	0.325841	8	1.22068		Trial 1	F5	UP	F	0:05:43.406-0:05:43.672	IT2	0.358738	8	1.34392
Trial 1	F1	P	F	0:05:43.672-0:05:43.938	IT1	0.276804	8	1.03698		Trial 1	F5	UP	F	0:05:43.672-0:05:43.938	IT2	0.726365	8	2.72115
Trial 1	F1	P	F	0:05:43.938-0:05:44.204	IT1	0.883212	8	3.30873		Trial 1	F5	UP	F	0:05:43.938-0:05:44.204	IT2	0.37748	8	1.41413
Trial 1	F1	P	F	0:05:44.204-0:05:44.470	IT1	2.11448	8	7.92137		Trial 1	F5	UP	F	0:05:44.204-0:05:44.470	IT2	0.846838	8	3.17245
Trial 1	F1	P	F	0:05:44.470-0:05:44.736	IT1	2.71519	8	10.1718		Trial 1	F5	UP	F	0:05:44.470-0:05:44.736	IT2	0.770697	8	2.88723
Trial 1	F1	P	F	0:05:44.736-0:05:45.002	IT1	1.61682	8	6.05699		Trial 1	F5	UP	F	0:05:44.736-0:05:45.002	IT2	0.393422	8	1.47385
Trial 1	F1	P	F	0:05:45.002-0:05:45.268	IT1	0.307407	8	1.15163		Trial 1	F5	UP	F	0:05:45.002-0:05:45.268	IT2	0.369269	8	1.38338
Trial 1	F1	P	F	0:05:45.268-0:05:45.534	IT1	0.303826	8	1.1382		Trial 1	F5	UP	F	0:05:45.268-0:05:45.534	IT2	0.764674	8	2.86466
Trial 1	F1	P	F	0:05:45.534-0:05:45.800	IT1	0.420081	8	1.57372		Trial 1	F5	UP	F	0:05:45.534-0:05:45.800	IT2	1.4147	8	5.29982
Trial 1	F1	P	F	0:05:45.800-0:05:46.066	IT1	1.76549	8	6.614		Trial 1	F5	UP	F	0:05:45.800-0:05:46.066	IT2	3.40609	8	12.7601
Trial 1	F1	P	F	0:05:46.066-0:05:46.332	IT1	1.55949	8	5.84223		Trial 1	F5	UP	F	0:05:46.066-0:05:46.332	IT2	1.06379	8	3.98521
Trial 1	F1	P	F	0:05:46.332-0:05:46.598	IT1	0.718585	8	2.692		Trial 1	F5	UP	F	0:05:46.332-0:05:46.598	IT2	2.5453	8	9.53543
Trial 1	F1	P	F	0:05:46.598-0:05:46.864	IT1	1.33402	8	4.99756		Trial 1	F5	UP	F	0:05:46.598-0:05:46.864	IT2	2.27062	8	8.50627
Trial 1	F1	P	F	0:05:46.864-0:05:47.130	IT1	2.06353	8	7.73051		Trial 1	F5	UP	F	0:05:46.864-0:05:47.130	IT2	1.41041	8	5.28377
Trial 1	F1	P	F	0:05:47.130-0:05:47.396	IT1	0.333	8	1.24751		Trial 1	F5	UP	F	0:05:47.130-0:05:47.396	IT2	0.690533	8	2.58691
Trial 1	F1	P	F	0:05:47.396-0:05:47.662	IT1	0.254028	8	0.951647		Trial 1	F5	UP	F	0:05:47.396-0:05:47.662	IT2	0.749023	8	2.80602
Trial 1	F1	P	F	0:05:47.662-0:05:47.928	IT1	0.552286	8	2.06901		Trial 1	F5	UP	F	0:05:47.662-0:05:47.928	IT2	0.646334	8	2.42134
Trial 1	F1	P	F	0:05:47.928-0:05:48.194	IT1	1.3494	8	5.05519		Trial 1	F5	UP	F	0:05:47.928-0:05:48.194	IT2	0.351354	8	1.31625
Trial 1	F1	P	F	0:05:48.194-0:05:48.460	IT1	0.485232	8	1.8178		Trial 1	F5	UP	F	0:05:48.194-0:05:48.460	IT2	0.907787	8	3.40079
Trial 1	F1	P	F	0:05:48.460-0:05:48.726	IT1	0.309708	8	1.16024		Trial 1	F5	UP	F	0:05:48.460-0:05:48.726	IT2	1.04261	8	3.90587
Trial 1	F1	P	F	0:05:48.726-0:05:48.992	IT1	0.307636	8	1.15248		Trial 1	F5	UP	F	0:05:48.726-0:05:48.992	IT2	0.597594	8	2.23873
Trial 1	F1	P	F	0:05:48.992-0:05:49.258	IT1	0.396685	8	1.48608		Trial 1	F5	UP	F	0:05:48.992-0:05:49.258	IT2	0.871501	8	3.26487
Trial 1	F1	P	F	0:05:49.258-0:05:49.524	IT1	0.341583	8	1.27966		Trial 1	F5	UP	F	0:05:49.258-0:05:49.524	IT2	1.11236	8	4.16718
Trial 1	F1	P	F	0:05:49.524-0:05:49.790	IT1	0.373827	8	1.40045		Trial 1	F5	UP	F	0:05:49.524-0:05:49.790	IT2	1.33384	8	4.99687
Trial 1	F1	P	F	0:05:49.790-0:05:50.056	IT1	0.289381	8	1.08409		Trial 1	F5	UP	F	0:05:49.790-0:05:50.056	IT2	2.06071	8	7.71992
Trial 1	F1	P	F	0:05:50.056-0:05:50.322	IT1	0.110603	8	0.414344		Trial 1	F5	UP	F	0:05:50.056-0:05:50.322	IT2	2.71393	8	10.167
Trial 1	F1	P	F	0:05:50.322-0:05:50.588	IT1	0.122593	8	0.459269		Trial 1	F5	UP	F	0:05:50.322-0:05:50.588	IT2	4.46405	8	16.7235
Trial 1	F1	P	F	0:05:50.588-0:05:50.854	IT1	0.157543	8	0.590197		Trial 1	F5	UP	F	0:05:50.588-0:05:50.854	IT2	3.49221	8	13.0827
Trial 1	F1	P	F	0:05:50.854-0:05:51.120	IT1	0.169975	8	0.63677		Trial 1	F5	UP	F	0:05:50.854-0:05:51.120	IT2	0.651672	8	2.44133
Trial 1	F1	P	F	0:05:51.120-0:05:51.386	IT1	0.25322	8	0.94863		Trial 1	F5	UP	F	0:05:51.120-0:05:51.386	IT2	0.335487	8	1.25682
Trial 1	F1	P	F	0:05:51.386-0:05:51.652	IT1	0.751272	8	2.81445		Trial 1	F5	UP	F	0:05:51.386-0:05:51.652	IT2	0.795818	8	2.98132
Trial 1	F1	P	F	0:05:51.652-0:05:51.918	IT1	0.590126	7	2.52659		Trial 1	F5	UP	F	0:05:51.652-0:05:51.918	IT2	2.02902	7	8.68712
Trial 1	F1	P	F	0:05:51.918-0:05:52.184	IT1	0.267318	8	1.00144		Trial 1	F5	UP	F	0:05:51.918-0:05:52.184	IT2	1.30854	8	4.90213
Trial 1	F1	P	F	0:05:52.184-0:05:52.450	IT1	0.853001	8	3.19557		Trial 1	F5	UP	F	0:05:52.184-0:05:52.450	IT2	0.818001	8	3.06443
Trial 1	F1	P	F	0:05:52.450-0:05:52.716	IT1	2.19365	8	8.21795		Trial 1	F5	UP	F	0:05:52.450-0:05:52.716	IT2	0.486192	8	1.8214
Trial 1	F1	P	F	0:05:52.716-0:05:52.982	IT1	3.60482	8	13.5046		Trial 1	F5	UP	F	0:05:52.716-0:05:52.982	IT2	0.362208	8	1.35692
Trial 1	F1	P	F	0:05:52.982-0:05:53.248	IT1	3.9362	8	14.7459		Trial 1	F5	UP	F	0:05:52.982-0:05:53.248	IT2	1.00387	8	3.76075
Trial 1	F1	P	F	0:05:53.248-0:05:53.514	IT1	2.51964	8	9.43921		Trial 1	F5	UP	F	0:05:53.248-0:05:53.514	IT2	0.852733	8	3.19455
Trial 1	F1	P	F	0:05:53.514-0:05:53.780	IT1	0.981139	8	3.67559		Trial 1	F5	UP	F	0:05:53.514-0:05:53.780	IT2	0.199289	8	0.746583
Trial 1	F1	P	F	0:05:53.780-0:05:54.046	IT1	0.326457	8	1.22299		Trial 1	F5	UP	F	0:05:53.780-0:05:54.046	IT2	0.350572	8	1.31333
Trial 1	F1	P	F	0:05:54.046-0:05:54.312	IT1	1.16788	8	4.37516		Trial 1	F5	UP	F	0:05:54.046-0:05:54.312	IT2	0.388179	8	1.45422
Trial 1	F1	P	F	0:05:54.312-0:05:54.578	IT1	2.84975	8	10.6759		Trial 1	F5	UP	F	0:05:54.312-0:05:54.578	IT2	0.610108	8	2.28561
Trial 1	F1	P	F	0:05:54.578-0:05:54.844	IT1	1.31873	8	4.94032		Trial 1	F5	UP	F	0:05:54.578-0:05:54.844	IT2	1.17944	8	4.41849
Trial 1	F1	P	F	0:05:54.844-0:05:55.110	IT1	0.476711	8	1.78588		Trial 1	F5	UP	F	0:05:54.844-0:05:55.110	IT2	0.805649	8	3.01816
Trial 1	F1	P	F	0:05:55.110-0:05:55.376	IT1	0.169685	8	0.635685		Trial 1	F5	UP	F	0:05:55.110-0:05:55.376	IT2	0.473643	8	1.77439
Trial 1	F1	P	F	0:05:55.376-0:05:55.642	IT1	0.155014	8	0.580717		Trial 1	F5	UP	F	0:05:55.376-0:05:55.642	IT2	0.134183	8	0.502682
Trial 1	F1	P	F	0:05:55.642-0:05:55.908	IT1	0.0922874	8	0.345729		Trial 1	F5	UP	F	0:05:55.642-0:05:55.908	IT2	0.54001	8	2.023
Trial 1	F1	P	F	0:05:55.908-0:05:56.174	IT1	0.237439	8	0.889511		Trial 1	F5	UP	F	0:05:55.908-0:05:56.174	IT2	1.82047	8	6.81996
Trial 1	F1	P	F	0:05:56.174-0:05:56.440	IT1	0.205819	8	0.771049		Trial 1	F5	UP	F	0:05:56.174-0:05:56.440	IT2	1.78218	8	6.67651
Trial 1	F1	P	F	0:05:56.440-0:05:56.706	IT1	0.073051	8	0.273666		Trial 1	F5	UP	F	0:05:56.440-0:05:56.706	IT2	1.88075	8	7.04575
Trial 1	F1	P	F	0:05:56.706-0:05:56.972	IT1	0.536749	8	2.0108		Trial 1	F5	UP	F	0:05:56.706-0:05:56.972	IT2	1.26098	8	4.72397
Trial 1	F1	P	F	0:05:56.972-0:05:57.238	IT1	0.757129	8	2.83638		Trial 1	F5	UP	F	0:05:56.972-0:05:57.238	IT2	3.17397	8	11.8905
Trial 1	F1	P	F	0:05:57.238-0:05:57.504	IT1	1.04431	8	3.91226		Trial 1	F5	UP	F	0:05:57.238-0:05:57.504	IT2	3.23607	8	12.1232
Trial 1	F1	P	F	0:05:57.504-0:05:57.770	IT1	0.430831	8	1.61399		Trial 1	F5	UP	F	0:05:57.504-0:05:57.770	IT2	4.27807	8	16.0267
Trial 1	F1	P	F	0:05:57.770-0:05:58.036	IT1	1.12071	8	4.19843		Trial 1	F5	UP	F	0:05:57.770-0:05:58.036	IT2	3.8612	8	14.465
Trial 1	F1	P	F	0:05:58.036-0:05:58.302	IT1	2.40519	8	9.01042		Trial 1	F5	UP	F	0:05:58.036-0:05:58.302	IT2	1.63849	8	6.13821
Trial 1	F1	P	F	0:05:58.302-0:05:58.568	IT1	0.889049	8	3.33059		Trial 1	F5	UP	F	0:05:58.302-0:05:58.568	IT2	1.12525	8	4.21547
Trial 1	F1	P	F	0:05:58.568-0:05:58.834	IT1	0.275289	8	1.0313		Trial 1	F5	UP	F	0:05:58.568-0:05:58.834	IT2	1.23113	8	4.61213
Trial 1	F1	P	F	0:05:58.834-0:05:59.100	IT1	0.327503	8	1.22691		Trial 1	F5	UP	F	0:05:58.834-0:05:59.100	IT2	2.80601	8	10.512
Trial 1	F1	P	F	0:05:59.100-0:05:59.366	IT1	0.314155	8	1.1769		Trial 1	F5	UP	F	0:05:59.100-0:05:59.366	IT2	1.39025	8	5.2082
Trial 1	F1	P	F	0:05:59.366-0:05:59.632	IT1	0.233273	8	0.873899		Trial 1	F5	UP	F	0:05:59.366-0:05:59.632	IT2	1.26341	8	4.73305
Trial 1	F1	P	F	0:05:59.632-0:05:59.898	IT1	0.388185	8	1.45424		Trial 1	F5	UP	F	0:05:59.632-0:05:59.898	IT2	2.3967	8	8.97861
Trial 1	F1	P	F	0:05:59.898-0:06:00.164	IT1	0.378491	8	1.41792		Trial 1	F5	UP	F	0:05:59.898-0:06:00.164	IT2	2.03033	8	7.60616
Trial 1	F1	P	F	0:06:00.164-0:06:00.430	IT1	0.132033	8	0.494627		Trial 1	F5	UP	F	0:06:00.164-0:06:00.430	IT2	2.40606	8	9.01368
Trial 1	F1	P	F	0:06:00.430-0:06:00.696	IT1	0.226555	8	0.848726		Trial 1	F5	UP	F	0:06:00.430-0:06:00.696	IT2	1.71681	8	6.43163
Trial 1	F1	P	F	0:06:00.696-0:06:00.962	IT1	0.188388	8	0.705748		Trial 1	F5	UP	F	0:06:00.696-0:06:00.962	IT2	1.70541	8	6.38888
Trial 1	F1	P	F	0:06:00.962-0:06:01.228	IT1	0.338291	8	1.26732		Trial 1	F5	UP	F	0:06:00.962-0:06:01.228	IT2	2.10983	8	7.90395
Trial 1	F1	P	F	0:06:01.228-0:06:01.494	IT1	0.301834	7	1.29228		Trial 1	F5	UP	F	0:06:01.228-0:06:01.494	IT2	1.3924	7	5.96145
Trial 1	F1	P	F	0:06:01.494-0:06:01.760	IT1	0.288829	8	1.08203		Trial 1	F5	UP	F	0:06:01.494-0:06:01.760	IT2	2.08526	8	7.81192
Trial 1	F1	P	F	0:06:01.760-0:06:02.026	IT1	0.188578	8	0.706458		Trial 1	F5	UP	F	0:06:01.760-0:06:02.026	IT2	2.69852	8	10.1093
Trial 1	F1	P	F	0:06:02.026-0:06:02.292	IT1	0.492298	8	1.84427		Trial 1	F5	UP	F	0:06:02.026-0:06:02.292	IT2	2.6519	8	9.93468
Trial 1	F1	P	F	0:06:02.292-0:06:02.558	IT1	2.34067	8	8.76876		Trial 1	F5	UP	F	0:06:02.292-0:06:02.558	IT2	0.611321	8	2.29016
Trial 1	F1	P	F	0:06:02.558-0:06:02.824	IT1	1.02389	8	3.83573		Trial 1	F5	UP	F	0:06:02.558-0:06:02.824	IT2	0.297468	8	1.11439
Trial 1	F1	P	F	0:06:02.824-0:06:03.090	IT1	2.71132	8	10.1573		Trial 1	F5	UP	F	0:06:02.824-0:06:03.090	IT2	0.263938	8	0.988782
Trial 1	F1	P	F	0:06:03.090-0:06:03.356	IT1	1.83702	8	6.88193		Trial 1	F5	UP	F	0:06:03.090-0:06:03.356	IT2	1.0711	8	4.01259
Trial 1	F1	P	F	0:06:03.356-0:06:03.622	IT1	1.72922	8	6.47808		Trial 1	F5	UP	F	0:06:03.356-0:06:03.622	IT2	4.164	8	15.5994
Trial 1	F1	P	F	0:06:03.622-0:06:03.888	IT1	0.982737	8	3.68158		Trial 1	F5	UP	F	0:06:03.622-0:06:03.888	IT2	4.43824	8	16.6268
Trial 1	F1	P	F	0:06:03.888-0:06:04.154	IT1	0.990318	8	3.71		Trial 1	F5	UP	F	0:06:03.888-0:06:04.154	IT2	3.32561	8	12.4585
Trial 1	F1	P	F	0:06:04.154-0:06:04.420	IT1	0.918119	8	3.43951		Trial 1	F5	UP	F	0:06:04.154-0:06:04.420	IT2	3.43207	8	12.8574
Trial 1	F1	P	F	0:06:04.420-0:06:04.686	IT1	0.265591	8	0.994969		Trial 1	F5	UP	F	0:06:04.420-0:06:04.686	IT2	0.915027	8	3.42792
Trial 1	F1	P	F	0:06:04.686-0:06:04.952	IT1	0.247306	8	0.926471		Trial 1	F5	UP	F	0:06:04.686-0:06:04.952	IT2	1.46587	8	5.49154
Trial 1	F1	P	F	0:06:04.952-0:06:05.218	IT1	0.759251	8	2.84435		Trial 1	F5	UP	F	0:06:04.952-0:06:05.218	IT2	0.682894	8	2.55829
Trial 1	F1	P	F	0:06:05.218-0:06:05.484	IT1	0.526476	8	1.9723		Trial 1	F5	UP	F	0:06:05.218-0:06:05.484	IT2	0.608883	8	2.28102
Trial 1	F1	P	F	0:06:05.484-0:06:05.750	IT1	0.373211	8	1.39815		Trial 1	F5	UP	F	0:06:05.484-0:06:05.750	IT2	0.786737	8	2.94732
Trial 1	F1	P	F	0:06:05.750-0:06:06.016	IT1	0.842422	8	3.15593		Trial 1	F5	UP	F	0:06:05.750-0:06:06.016	IT2	0.989974	8	3.70869
Trial 1	F1	P	F	0:06:06.016-0:06:06.282	IT1	2.18536	8	8.18693		Trial 1	F5	UP	F	0:06:06.016-0:06:06.282	IT2	1.45403	8	5.44721
Trial 1	F1	P	F	0:06:06.282-0:06:06.548	IT1	1.76304	8	6.60477		Trial 1	F5	UP	F	0:06:06.282-0:06:06.548	IT2	1.29363	8	4.84627
Trial 1	F1	P	F	0:06:06.548-0:06:06.814	IT1	0.744442	8	2.78886		Trial 1	F5	UP	F	0:06:06.548-0:06:06.814	IT2	0.517466	8	1.93856
Trial 1	F1	P	F	0:06:06.814-0:06:07.080	IT1	0.94351	8	3.53464		Trial 1	F5	UP	F	0:06:06.814-0:06:07.080	IT2	1.98492	8	7.43602
Trial 1	F1	P	F	0:06:07.080-0:06:07.346	IT1	0.45427	8	1.70181		Trial 1	F5	UP	F	0:06:07.080-0:06:07.346	IT2	0.839658	8	3.14556
Trial 1	F1	P	F	0:06:07.346-0:06:07.612	IT1	0.419487	8	1.57152		Trial 1	F5	UP	F	0:06:07.346-0:06:07.612	IT2	0.755917	8	2.83185
Trial 1	F1	P	F	0:06:07.612-0:06:07.878	IT1	2.38487	8	8.93429		Trial 1	F5	UP	F	0:06:07.612-0:06:07.878	IT2	2.15076	8	8.05724
Trial 1	F1	P	F	0:06:07.878-0:06:08.144	IT1	3.87995	8	14.5352		Trial 1	F5	UP	F	0:06:07.878-0:06:08.144	IT2	1.99437	8	7.47137
Trial 1	F1	P	F	0:06:08.144-0:06:08.410	IT1	6.10909	8	22.8863		Trial 1	F5	UP	F	0:06:08.144-0:06:08.410	IT2	2.49477	8	9.34604
Trial 1	F1	P	F	0:06:08.410-0:06:08.676	IT1	6.46299	8	24.2119		Trial 1	F5	UP	F	0:06:08.410-0:06:08.676	IT2	1.42599	8	5.34213
Trial 1	F1	P	F	0:06:08.676-0:06:08.942	IT1	2.09699	8	7.85584		Trial 1	F5	UP	F	0:06:08.676-0:06:08.942	IT2	1.09745	8	4.11134
Trial 1	F1	P	F	0:06:08.942-0:06:09.208	IT1	0.427841	8	1.60279		Trial 1	F5	UP	F	0:06:08.942-0:06:09.208	IT2	1.31269	8	4.91764
Trial 1	F1	P	F	0:06:09.208-0:06:09.474	IT1	0.386046	8	1.44622		Trial 1	F5	UP	F	0:06:09.208-0:06:09.474	IT2	0.511698	8	1.91694
Trial 1	F1	P	F	0:06:09.474-0:06:09.740	IT1	0.606491	8	2.27208		Trial 1	F5	UP	F	0:06:09.474-0:06:09.740	IT2	0.89866	8	3.36661
Trial 1	F1	P	F	0:06:09.740-0:06:10.006	IT1	0.744035	8	2.78734		Trial 1	F5	UP	F	0:06:09.740-0:06:10.006	IT2	1.41813	8	5.31266
Trial 1	F1	P	F	0:06:10.006-0:06:10.272	IT1	0.74986	8	2.80917		Trial 1	F5	UP	F	0:06:10.006-0:06:10.272	IT2	0.463372	8	1.73591
Trial 1	F1	P	F	0:06:10.272-0:06:10.538	IT1	0.309654	8	1.16004		Trial 1	F5	UP	F	0:06:10.272-0:06:10.538	IT2	0.223089	8	0.835742
Trial 1	F1	P	F	0:06:10.538-0:06:10.804	IT1	0.285938	7	1.22422		Trial 1	F5	UP	F	0:06:10.538-0:06:10.804	IT2	0.310781	7	1.33059
Trial 1	F1	P	F	0:06:10.804-0:06:11.070	IT1	0.483551	8	1.8115		Trial 1	F5	UP	F	0:06:10.804-0:06:11.070	IT2	0.708323	8	2.65355
Trial 1	F1	P	F	0:06:11.070-0:06:11.336	IT1	0.22738	8	0.851821		Trial 1	F5	UP	F	0:06:11.070-0:06:11.336	IT2	0.283891	8	1.06353
Trial 1	F1	P	F	0:06:11.336-0:06:11.602	IT1	0.578401	8	2.16683		Trial 1	F5	UP	F	0:06:11.336-0:06:11.602	IT2	0.445677	8	1.66961
Trial 1	F1	P	F	0:06:11.602-0:06:11.868	IT1	0.490855	8	1.83887		Trial 1	F5	UP	F	0:06:11.602-0:06:11.868	IT2	1.57577	8	5.90324
Trial 1	F1	P	F	0:06:11.868-0:06:12.134	IT1	0.242814	8	0.909639		Trial 1	F5	UP	F	0:06:11.868-0:06:12.134	IT2	0.813882	8	3.049
Trial 1	F1	P	F	0:06:12.134-0:06:12.400	IT1	0.347839	8	1.30309		Trial 1	F5	UP	F	0:06:12.134-0:06:12.400	IT2	0.484748	8	1.81599
Trial 1	F1	P	F	0:06:12.400-0:06:12.666	IT1	0.473526	8	1.77395		Trial 1	F5	UP	F	0:06:12.400-0:06:12.666	IT2	0.271087	8	1.01556
Trial 1	F1	P	F	0:06:12.666-0:06:12.932	IT1	1.38015	8	5.17039		Trial 1	F5	UP	F	0:06:12.666-0:06:12.932	IT2	0.295808	8	1.10817
Trial 1	F1	P	F	0:06:12.932-0:06:13.198	IT1	1.40829	8	5.27583		Trial 1	F5	UP	F	0:06:12.932-0:06:13.198	IT2	0.139701	8	0.523356
Trial 1	F1	P	F	0:06:13.198-0:06:13.464	IT1	0.651373	8	2.4402		Trial 1	F5	UP	F	0:06:13.198-0:06:13.464	IT2	0.423989	8	1.58837
Trial 1	F1	P	F	0:06:13.464-0:06:13.730	IT1	0.235325	8	0.88158		Trial 1	F5	UP	F	0:06:13.464-0:06:13.730	IT2	0.825782	8	3.09357
Trial 1	F1	P	F	0:06:13.730-0:06:13.996	IT1	0.247639	8	0.927722		Trial 1	F5	UP	F	0:06:13.730-0:06:13.996	IT2	0.694958	8	2.60348
Trial 1	F1	P	F	0:06:13.996-0:06:14.262	IT1	0.419713	8	1.57235		Trial 1	F5	UP	F	0:06:13.996-0:06:14.262	IT2	0.346739	8	1.29897
Trial 1	F1	P	F	0:06:14.262-0:06:14.528	IT1	1.00098	8	3.74992		Trial 1	F5	UP	F	0:06:14.262-0:06:14.528	IT2	0.215281	8	0.806494
Trial 1	F1	P	F	0:06:14.528-0:06:14.794	IT1	0.497022	8	1.86197		Trial 1	F5	UP	F	0:06:14.528-0:06:14.794	IT2	0.131916	8	0.49419
Trial 1	F1	P	F	0:06:14.794-0:06:15.060	IT1	0.356591	8	1.33588		Trial 1	F5	UP	F	0:06:14.794-0:06:15.060	IT2	0.107684	8	0.403411
Trial 1	F1	P	F	0:06:15.060-0:06:15.326	IT1	0.734256	8	2.75073		Trial 1	F5	UP	F	0:06:15.060-0:06:15.326	IT2	0.147316	8	0.551884
Trial 1	F1	P	F	0:06:15.326-0:06:15.592	IT1	0.148104	8	0.554834		Trial 1	F5	UP	F	0:06:15.326-0:06:15.592	IT2	0.435414	8	1.63118
Trial 1	F1	P	F	0:06:15.592-0:06:15.858	IT1	0.161623	8	0.605479		Trial 1	F5	UP	F	0:06:15.592-0:06:15.858	IT2	0.579453	8	2.17078
Trial 1	F1	P	F	0:06:15.858-0:06:16.124	IT1	0.175813	8	0.658636		Trial 1	F5	UP	F	0:06:15.858-0:06:16.124	IT2	0.532955	8	1.99658
Trial 1	F1	P	F	0:06:16.124-0:06:16.390	IT1	0.0880633	8	0.329905		Trial 1	F5	UP	F	0:06:16.124-0:06:16.390	IT2	0.397623	8	1.4896
Trial 1	F1	P	F	0:06:16.390-0:06:16.656	IT1	0.0844432	8	0.316346		Trial 1	F5	UP	F	0:06:16.390-0:06:16.656	IT2	0.346433	8	1.29782
Trial 1	F1	P	F	0:06:16.656-0:06:16.922	IT1	0.0651258	8	0.243977		Trial 1	F5	UP	F	0:06:16.656-0:06:16.922	IT2	0.393388	8	1.47372
Trial 1	F1	P	F	0:06:16.922-0:06:17.188	IT1	0.067304	8	0.252139		Trial 1	F5	UP	F	0:06:16.922-0:06:17.188	IT2	0.366884	8	1.37445
Trial 1	F1	P	F	0:06:17.188-0:06:17.454	IT1	0.109389	8	0.4098		Trial 1	F5	UP	F	0:06:17.188-0:06:17.454	IT2	0.479914	8	1.79788
Trial 1	F1	P	F	0:06:17.454-0:06:17.720	IT1	0.1026	8	0.384366		Trial 1	F5	UP	F	0:06:17.454-0:06:17.720	IT2	1.15904	8	4.34205
Trial 1	F1	P	F	0:06:17.720-0:06:17.986	IT1	0.196995	8	0.737997		Trial 1	F5	UP	F	0:06:17.720-0:06:17.986	IT2	0.412784	8	1.5464
Trial 1	F1	P	F	0:06:17.986-0:06:18.252	IT1	0.160094	8	0.599752		Trial 1	F5	UP	F	0:06:17.986-0:06:18.252	IT2	0.222746	8	0.83446
Trial 1	F1	P	F	0:06:18.252-0:06:18.518	IT1	0.136593	8	0.511712		Trial 1	F5	UP	F	0:06:18.252-0:06:18.518	IT2	0.158816	8	0.594966
Trial 1	F1	P	F	0:06:18.518-0:06:18.784	IT1	0.141666	8	0.530717		Trial 1	F5	UP	F	0:06:18.518-0:06:18.784	IT2	0.0762716	8	0.285733
Trial 1	F1	P	F	0:06:18.784-0:06:19.050	IT1	0.166839	8	0.625021		Trial 1	F5	UP	F	0:06:18.784-0:06:19.050	IT2	0.0734404	8	0.275124
Trial 1	F1	P	F	0:06:19.050-0:06:19.316	IT1	0.154733	8	0.579668		Trial 1	F5	UP	F	0:06:19.050-0:06:19.316	IT2	0.247216	8	0.926135
Trial 1	F1	P	F	0:06:19.316-0:06:19.582	IT1	0.057694	8	0.216136		Trial 1	F5	UP	F	0:06:19.316-0:06:19.582	IT2	0.302076	8	1.13165
Trial 1	F1	P	F	0:06:19.582-0:06:19.848	IT1	0.089587	8	0.335616		Trial 1	F5	UP	F	0:06:19.582-0:06:19.848	IT2	0.299428	8	1.12173
Trial 1	F1	P	F	0:06:19.848-0:06:20.114	IT1	0.250681	8	0.939112		Trial 1	F5	UP	F	0:06:19.848-0:06:20.114	IT2	0.15873	8	0.594641
Trial 1	F1	P	F	0:06:20.114-0:06:20.380	IT1	0.153025	7	0.655162		Trial 1	F5	UP	F	0:06:20.114-0:06:20.380	IT2	0.440978	7	1.88801
Trial 1	F1	P	F	0:06:20.380-0:06:20.646	IT1	0.194392	8	0.728243		Trial 1	F5	UP	F	0:06:20.380-0:06:20.646	IT2	0.706695	8	2.64746
Trial 1	F1	P	F	0:06:20.646-0:06:20.912	IT1	0.221564	8	0.830032		Trial 1	F5	UP	F	0:06:20.646-0:06:20.912	IT2	0.500532	8	1.87511
Trial 1	F1	P	F	0:06:20.912-0:06:21.178	IT1	0.145746	8	0.545998		Trial 1	F5	UP	F	0:06:20.912-0:06:21.178	IT2	1.10156	8	4.12672
Trial 1	F1	P	F	0:06:21.178-0:06:21.444	IT1	0.300783	8	1.12681		Trial 1	F5	UP	F	0:06:21.178-0:06:21.444	IT2	1.11042	8	4.15992
Trial 1	F1	P	F	0:06:21.444-0:06:21.710	IT1	0.618634	8	2.31756		Trial 1	F5	UP	F	0:06:21.444-0:06:21.710	IT2	0.505187	8	1.89255
Trial 1	F1	P	F	0:06:21.710-0:06:21.976	IT1	0.90864	8	3.40399		Trial 1	F5	UP	F	0:06:21.710-0:06:21.976	IT2	0.62055	8	2.32474
Trial 1	F1	P	F	0:06:21.976-0:06:22.242	IT1	1.01853	8	3.81564		Trial 1	F5	UP	F	0:06:21.976-0:06:22.242	IT2	0.185105	8	0.693446
Trial 1	F1	P	F	0:06:22.242-0:06:22.508	IT1	1.87699	8	7.03167		Trial 1	F5	UP	F	0:06:22.242-0:06:22.508	IT2	0.94502	8	3.54027
Trial 1	F1	P	F	0:06:22.508-0:06:22.774	IT1	0.437315	8	1.6383		Trial 1	F5	UP	F	0:06:22.508-0:06:22.774	IT2	0.380844	8	1.42674
Trial 1	F1	P	F	0:06:22.774-0:06:23.040	IT1	0.173093	8	0.648451		Trial 1	F5	UP	F	0:06:22.774-0:06:23.040	IT2	0.0952588	8	0.356863
Trial 1	F1	P	F	0:06:23.040-0:06:23.306	IT1	0.190952	8	0.715359		Trial 1	F5	UP	F	0:06:23.040-0:06:23.306	IT2	0.180828	8	0.677429
Trial 1	F1	P	F	0:06:23.306-0:06:23.572	IT1	0.230986	8	0.865333		Trial 1	F5	UP	F	0:06:23.306-0:06:23.572	IT2	0.129313	8	0.484438
Trial 1	F1	P	F	0:06:23.572-0:06:23.838	IT1	0.474109	8	1.77614		Trial 1	F5	UP	F	0:06:23.572-0:06:23.838	IT2	0.5403	8	2.0241
Trial 1	F1	P	F	0:06:23.838-0:06:24.104	IT1	0.317952	8	1.19113		Trial 1	F5	UP	F	0:06:23.838-0:06:24.104	IT2	0.477929	8	1.79044
Trial 1	F1	P	F	0:06:24.104-0:06:24.370	IT1	0.347901	8	1.30332		Trial 1	F5	UP	F	0:06:24.104-0:06:24.370	IT2	0.298985	8	1.12007
Trial 1	F1	P	F	0:06:24.370-0:06:24.636	IT1	0.598586	8	2.24246		Trial 1	F5	UP	F	0:06:24.370-0:06:24.636	IT2	1.10162	8	4.12697
Trial 1	F1	P	F	0:06:24.636-0:06:24.902	IT1	0.39061	8	1.46332		Trial 1	F5	UP	F	0:06:24.636-0:06:24.902	IT2	0.417485	8	1.564
Trial 1	F1	P	F	0:06:24.902-0:06:25.168	IT1	0.226008	8	0.846682		Trial 1	F5	UP	F	0:06:24.902-0:06:25.168	IT2	0.275771	8	1.03311
Trial 1	F1	P	F	0:06:25.168-0:06:25.434	IT1	0.303818	8	1.13817		Trial 1	F5	UP	F	0:06:25.168-0:06:25.434	IT2	0.388224	8	1.45439
Trial 1	F1	P	F	0:06:25.434-0:06:25.700	IT1	0.390204	8	1.4618		Trial 1	F5	UP	F	0:06:25.434-0:06:25.700	IT2	0.285678	8	1.07022
Trial 1	F1	P	F	0:06:25.700-0:06:25.966	IT1	1.11256	8	4.16795		Trial 1	F5	UP	F	0:06:25.700-0:06:25.966	IT2	0.192959	8	0.722875
Trial 1	F1	P	F	0:06:25.966-0:06:26.232	IT1	0.946709	8	3.5466		Trial 1	F5	UP	F	0:06:25.966-0:06:26.232	IT2	0.156561	8	0.586515
Trial 1	F1	P	F	0:06:26.232-0:06:26.498	IT1	1.69937	8	6.36625		Trial 1	F5	UP	F	0:06:26.232-0:06:26.498	IT2	0.529288	8	1.98284
Trial 1	F1	P	F	0:06:26.498-0:06:26.764	IT1	1.00402	8	3.76133		Trial 1	F5	UP	F	0:06:26.498-0:06:26.764	IT2	0.663921	8	2.48722
Trial 1	F1	P	F	0:06:26.764-0:06:27.030	IT1	0.906292	8	3.39519		Trial 1	F5	UP	F	0:06:26.764-0:06:27.030	IT2	2.25328	8	8.44134
Trial 1	F1	P	F	0:06:27.030-0:06:27.296	IT1	1.91624	8	7.17874		Trial 1	F5	UP	F	0:06:27.030-0:06:27.296	IT2	1.32745	8	4.97296
Trial 1	F1	P	F	0:06:27.296-0:06:27.562	IT1	1.43992	8	5.3943		Trial 1	F5	UP	F	0:06:27.296-0:06:27.562	IT2	0.38827	8	1.45455
Trial 1	F1	P	F	0:06:27.562-0:06:27.828	IT1	2.10854	8	7.89908		Trial 1	F5	UP	F	0:06:27.562-0:06:27.828	IT2	0.454243	8	1.70171
Trial 1	F1	P	F	0:06:27.828-0:06:28.094	IT1	1.12075	8	4.19863		Trial 1	F5	UP	F	0:06:27.828-0:06:28.094	IT2	0.218597	8	0.818922
Trial 1	F1	P	F	0:06:28.094-0:06:28.360	IT1	2.0154	8	7.55023		Trial 1	F5	UP	F	0:06:28.094-0:06:28.360	IT2	1.03883	8	3.89173
Trial 1	F1	P	F	0:06:28.360-0:06:28.626	IT1	0.653452	8	2.44801		Trial 1	F5	UP	F	0:06:28.360-0:06:28.626	IT2	3.09386	8	11.5904
Trial 1	F1	P	F	0:06:28.626-0:06:28.892	IT1	1.77601	8	6.65339		Trial 1	F5	UP	F	0:06:28.626-0:06:28.892	IT2	4.03506	8	15.1163
Trial 1	F1	P	F	0:06:28.892-0:06:29.158	IT1	4.05174	8	15.1788		Trial 1	F5	UP	F	0:06:28.892-0:06:29.158	IT2	2.86435	8	10.7306
Trial 1	F1	P	F	0:06:29.158-0:06:29.424	IT1	2.75691	8	10.3281		Trial 1	F5	UP	F	0:06:29.158-0:06:29.424	IT2	1.59266	8	5.96651
Trial 1	F1	P	F	0:06:29.424-0:06:29.690	IT1	0.983846	8	3.68573		Trial 1	F5	UP	F	0:06:29.424-0:06:29.690	IT2	1.26969	8	4.75659
Trial 1	F1	P	F	0:06:29.690-0:06:29.956	IT1	0.93738	7	4.01332		Trial 1	F5	UP	F	0:06:29.690-0:06:29.956	IT2	3.27631	7	14.0273
Trial 1	F1	P	F	0:06:29.956-0:06:30.222	IT1	1.77563	8	6.65199		Trial 1	F5	UP	F	0:06:29.956-0:06:30.222	IT2	1.54579	8	5.79092
Trial 1	F1	P	F	0:06:30.222-0:06:30.488	IT1	1.13622	8	4.25657		Trial 1	F5	UP	F	0:06:30.222-0:06:30.488	IT2	0.437113	8	1.63753
Trial 1	F1	P	F	0:06:30.488-0:06:30.754	IT1	1.3057	8	4.89148		Trial 1	F5	UP	F	0:06:30.488-0:06:30.754	IT2	0.406952	8	1.52454
Trial 1	F1	P	F	0:06:30.754-0:06:31.020	IT1	1.97486	8	7.39837		Trial 1	F5	UP	F	0:06:30.754-0:06:31.020	IT2	1.02078	8	3.82411
Trial 1	F1	P	F	0:06:31.020-0:06:31.286	IT1	1.32719	8	4.97196		Trial 1	F5	UP	F	0:06:31.020-0:06:31.286	IT2	0.779804	8	2.92135
Trial 1	F1	P	F	0:06:31.286-0:06:31.552	IT1	1.19531	8	4.47793		Trial 1	F5	UP	F	0:06:31.286-0:06:31.552	IT2	0.832481	8	3.1187
Trial 1	F1	P	F	0:06:31.552-0:06:31.818	IT1	0.769492	8	2.8827		Trial 1	F5	UP	F	0:06:31.552-0:06:31.818	IT2	1.58055	8	5.92111
Trial 1	F1	P	F	0:06:31.818-0:06:32.084	IT1	1.34004	8	5.02013		Trial 1	F5	UP	F	0:06:31.818-0:06:32.084	IT2	0.440012	8	1.64839
Trial 1	F1	P	F	0:06:32.084-0:06:32.350	IT1	1.11366	8	4.17206		Trial 1	F5	UP	F	0:06:32.084-0:06:32.350	IT2	0.626149	8	2.34571
Trial 1	F1	P	F	0:06:32.350-0:06:32.616	IT1	1.18894	8	4.4541		Trial 1	F5	UP	F	0:06:32.350-0:06:32.616	IT2	0.801717	8	3.00343
Trial 1	F1	P	F	0:06:32.616-0:06:32.882	IT1	0.728824	8	2.73035		Trial 1	F5	UP	F	0:06:32.616-0:06:32.882	IT2	1.0315	8	3.86429
Trial 1	F1	P	F	0:06:32.882-0:06:33.148	IT1	0.629694	8	2.35898		Trial 1	F5	UP	F	0:06:32.882-0:06:33.148	IT2	0.440628	8	1.6507
Trial 1	F1	P	F	0:06:33.148-0:06:33.414	IT1	1.2733	8	4.77007		Trial 1	F5	UP	F	0:06:33.148-0:06:33.414	IT2	0.197567	8	0.740132
Trial 1	F1	P	F	0:06:33.414-0:06:33.680	IT1	2.54558	8	9.53639		Trial 1	F5	UP	F	0:06:33.414-0:06:33.680	IT2	0.110815	8	0.415139
Trial 1	F1	P	F	0:06:33.680-0:06:33.946	IT1	1.00654	8	3.77075		Trial 1	F5	UP	F	0:06:33.680-0:06:33.946	IT2	0.128807	8	0.482545
Trial 1	F1	P	F	0:06:33.946-0:06:34.212	IT1	1.35066	8	5.05992		Trial 1	F5	UP	F	0:06:33.946-0:06:34.212	IT2	0.200845	8	0.752416
Trial 1	F1	P	F	0:06:34.212-0:06:34.478	IT1	2.45758	8	9.20669		Trial 1	F5	UP	F	0:06:34.212-0:06:34.478	IT2	0.150705	8	0.564576
Trial 1	F1	P	F	0:06:34.478-0:06:34.744	IT1	1.33027	8	4.98349		Trial 1	F5	UP	F	0:06:34.478-0:06:34.744	IT2	0.371874	8	1.39313
Trial 1	F1	P	F	0:06:34.744-0:06:35.010	IT1	1.85369	8	6.94436		Trial 1	F5	UP	F	0:06:34.744-0:06:35.010	IT2	0.510559	8	1.91269
Trial 1	F1	P	F	0:06:35.010-0:06:35.276	IT1	4.26557	8	15.9798		Trial 1	F5	UP	F	0:06:35.010-0:06:35.276	IT2	0.342865	8	1.28445
Trial 1	F1	P	F	0:06:35.276-0:06:35.542	IT1	0.774755	8	2.90244		Trial 1	F5	UP	F	0:06:35.276-0:06:35.542	IT2	0.216701	8	0.811819
Trial 1	F1	P	F	0:06:35.542-0:06:35.808	IT1	0.426649	8	1.59834		Trial 1	F5	UP	F	0:06:35.542-0:06:35.808	IT2	0.463362	8	1.73587
Trial 1	F1	P	F	0:06:35.808-0:06:36.074	IT1	0.355438	8	1.33156		Trial 1	F5	UP	F	0:06:35.808-0:06:36.074	IT2	0.686025	8	2.57002
Trial 1	F1	P	F	0:06:36.074-0:06:36.340	IT1	1.05309	8	3.94513		Trial 1	F5	UP	F	0:06:36.074-0:06:36.340	IT2	0.671196	8	2.51447
Trial 1	F1	P	F	0:06:36.340-0:06:36.606	IT1	0.383124	8	1.43527		Trial 1	F5	UP	F	0:06:36.340-0:06:36.606	IT2	0.284312	8	1.0651
Trial 1	F1	P	F	0:06:36.606-0:06:36.872	IT1	2.08373	8	7.80614		Trial 1	F5	UP	F	0:06:36.606-0:06:36.872	IT2	0.247406	8	0.926849
Trial 1	F1	P	F	0:06:36.872-0:06:37.138	IT1	0.324741	8	1.21655		Trial 1	F5	UP	F	0:06:36.872-0:06:37.138	IT2	0.440506	8	1.65024
Trial 1	F1	P	F	0:06:37.138-0:06:37.404	IT1	0.771594	8	2.89058		Trial 1	F5	UP	F	0:06:37.138-0:06:37.404	IT2	0.400068	8	1.49875
Trial 1	F1	P	F	0:06:37.404-0:06:37.670	IT1	0.915761	8	3.43069		Trial 1	F5	UP	F	0:06:37.404-0:06:37.670	IT2	0.455855	8	1.70775
Trial 1	F1	P	F	0:06:37.670-0:06:37.936	IT1	4.81583	8	18.0413		Trial 1	F5	UP	F	0:06:37.670-0:06:37.936	IT2	0.263471	8	0.987026
Trial 1	F1	P	F	0:06:37.936-0:06:38.202	IT1	2.47039	8	9.25475		Trial 1	F5	UP	F	0:06:37.936-0:06:38.202	IT2	0.357685	8	1.33999
Trial 1	F1	P	F	0:06:38.202-0:06:38.468	IT1	2.75326	8	10.3144		Trial 1	F5	UP	F	0:06:38.202-0:06:38.468	IT2	0.130761	8	0.489863
Trial 1	F1	P	F	0:06:38.468-0:06:38.734	IT1	3.48141	8	13.0422		Trial 1	F5	UP	F	0:06:38.468-0:06:38.734	IT2	0.441186	8	1.65279
Trial 1	F1	P	F	0:06:38.734-0:06:39.000	IT1	3.09081	8	11.5789		Trial 1	F5	UP	F	0:06:38.734-0:06:39.000	IT2	0.292287	8	1.09499
Trial 1	F1	P	F	0:06:39.000-0:06:39.266	IT1	3.49344	8	13.0873		Trial 1	F5	UP	F	0:06:39.000-0:06:39.266	IT2	0.687703	8	2.5763
Trial 1	F1	P	F	0:06:39.266-0:06:39.532	IT1	3.42202	7	14.6511		Trial 1	F5	UP	F	0:06:39.266-0:06:39.532	IT2	0.697788	7	2.98753
Trial 1	F1	P	F	0:06:39.532-0:06:39.798	IT1	2.32072	8	8.69402		Trial 1	F5	UP	F	0:06:39.532-0:06:39.798	IT2	0.817148	8	3.06125
Trial 1	F1	P	F	0:06:39.798-0:06:40.064	IT1	0.953437	8	3.5718		Trial 1	F5	UP	F	0:06:39.798-0:06:40.064	IT2	1.02287	8	3.83191
Trial 1	F1	P	F	0:06:40.064-0:06:40.330	IT1	1.32485	8	4.96323		Trial 1	F5	UP	F	0:06:40.064-0:06:40.330	IT2	0.611475	8	2.29074
Trial 1	F1	P	F	0:06:40.330-0:06:40.596	IT1	1.70741	8	6.39639		Trial 1	F5	UP	F	0:06:40.330-0:06:40.596	IT2	0.188303	8	0.70543
Trial 1	F1	P	F	0:06:40.596-0:06:40.862	IT1	0.900815	8	3.37467		Trial 1	F5	UP	F	0:06:40.596-0:06:40.862	IT2	0.146432	8	0.548569
Trial 1	F1	P	F	0:06:40.862-0:06:41.128	IT1	0.891949	8	3.34147		Trial 1	F5	UP	F	0:06:40.862-0:06:41.128	IT2	0.322462	8	1.20803
Trial 1	F1	P	F	0:06:41.128-0:06:41.394	IT1	0.678624	8	2.5423		Trial 1	F5	UP	F	0:06:41.128-0:06:41.394	IT2	0.943604	8	3.53498
Trial 1	F1	P	F	0:06:41.394-0:06:41.660	IT1	3.24605	8	12.1605		Trial 1	F5	UP	F	0:06:41.394-0:06:41.660	IT2	1.47081	8	5.51004
Trial 1	F1	P	F	0:06:41.660-0:06:41.926	IT1	3.78864	8	14.1932		Trial 1	F5	UP	F	0:06:41.660-0:06:41.926	IT2	2.60369	8	9.75409
Trial 1	F1	P	F	0:06:41.926-0:06:42.192	IT1	3.08631	8	11.5621		Trial 1	F5	UP	F	0:06:41.926-0:06:42.192	IT2	2.05836	8	7.71111
Trial 1	F1	P	F	0:06:42.192-0:06:42.458	IT1	1.5107	8	5.65947		Trial 1	F5	UP	F	0:06:42.192-0:06:42.458	IT2	0.347379	8	1.30138
Trial 1	F1	P	F	0:06:42.458-0:06:42.724	IT1	2.16022	8	8.09271		Trial 1	F5	UP	F	0:06:42.458-0:06:42.724	IT2	0.338151	8	1.2668
Trial 1	F1	P	F	0:06:42.724-0:06:42.990	IT1	1.08386	8	4.06044		Trial 1	F5	UP	F	0:06:42.724-0:06:42.990	IT2	0.736512	8	2.75917
Trial 1	F1	P	F	0:06:42.990-0:06:43.256	IT1	1.42584	8	5.34154		Trial 1	F5	UP	F	0:06:42.990-0:06:43.256	IT2	2.93421	8	10.9923
Trial 1	F1	P	F	0:06:43.256-0:06:43.522	IT1	0.777682	8	2.91338		Trial 1	F5	UP	F	0:06:43.256-0:06:43.522	IT2	2.19686	8	8.22998
Trial 1	F1	P	F	0:06:43.522-0:06:43.788	IT1	0.895872	8	3.35617		Trial 1	F5	UP	F	0:06:43.522-0:06:43.788	IT2	1.61037	8	6.03288
Trial 1	F1	P	F	0:06:43.788-0:06:44.054	IT1	2.94788	8	11.0435		Trial 1	F5	UP	F	0:06:43.788-0:06:44.054	IT2	1.93859	8	7.26242
Trial 1	F1	P	F	0:06:44.054-0:06:44.320	IT1	1.15423	8	4.32406		Trial 1	F5	UP	F	0:06:44.054-0:06:44.320	IT2	1.51767	8	5.68559
Trial 1	F1	P	F	0:06:44.320-0:06:44.586	IT1	1.20429	8	4.51154		Trial 1	F5	UP	F	0:06:44.320-0:06:44.586	IT2	0.345215	8	1.29326
Trial 1	F1	P	F	0:06:44.586-0:06:44.852	IT1	1.79678	8	6.73121		Trial 1	F5	UP	F	0:06:44.586-0:06:44.852	IT2	1.8658	8	6.98976
Trial 1	F1	P	F	0:06:44.852-0:06:45.118	IT1	0.591054	8	2.21423		Trial 1	F5	UP	F	0:06:44.852-0:06:45.118	IT2	1.19532	8	4.47797
Trial 1	F1	P	F	0:06:45.118-0:06:45.384	IT1	1.28317	8	4.80708		Trial 1	F5	UP	F	0:06:45.118-0:06:45.384	IT2	0.609497	8	2.28333
Trial 1	F1	P	F	0:06:45.384-0:06:45.650	IT1	1.05422	8	3.94939		Trial 1	F5	UP	F	0:06:45.384-0:06:45.650	IT2	0.619657	8	2.32141
Trial 1	F1	P	F	0:06:45.650-0:06:45.916	IT1	1.35954	8	5.09315		Trial 1	F5	UP	F	0:06:45.650-0:06:45.916	IT2	1.06592	8	3.99319
Trial 1	F1	P	F	0:06:45.916-0:06:46.182	IT1	2.11056	8	7.90669		Trial 1	F5	UP	F	0:06:45.916-0:06:46.182	IT2	0.267162	8	1.00085
Trial 1	F1	P	F	0:06:46.182-0:06:46.448	IT1	1.46408	8	5.48484		Trial 1	F5	UP	F	0:06:46.182-0:06:46.448	IT2	0.404304	8	1.51463
Trial 1	F1	P	F	0:06:46.448-0:06:46.714	IT1	0.601157	8	2.25208		Trial 1	F5	UP	F	0:06:46.448-0:06:46.714	IT2	0.209901	8	0.786344
Trial 1	F1	P	F	0:06:46.714-0:06:46.980	IT1	2.32897	8	8.72491		Trial 1	F5	UP	F	0:06:46.714-0:06:46.980	IT2	0.476432	8	1.78483
Trial 1	F1	P	F	0:06:46.980-0:06:47.246	IT1	2.74363	8	10.2783		Trial 1	F5	UP	F	0:06:46.980-0:06:47.246	IT2	0.554025	8	2.07552
Trial 1	F1	P	F	0:06:47.246-0:06:47.512	IT1	2.80999	8	10.5269		Trial 1	F5	UP	F	0:06:47.246-0:06:47.512	IT2	0.60019	8	2.24846
Trial 1	F1	P	F	0:06:47.512-0:06:47.778	IT1	4.27007	8	15.9968		Trial 1	F5	UP	F	0:06:47.512-0:06:47.778	IT2	0.164426	8	0.615979
Trial 1	F1	P	F	0:06:47.778-0:06:48.044	IT1	3.47109	8	13.0036		Trial 1	F5	UP	F	0:06:47.778-0:06:48.044	IT2	0.315918	8	1.1835
Trial 1	F1	P	F	0:06:48.044-0:06:48.310	IT1	2.46171	8	9.22222		Trial 1	F5	UP	F	0:06:48.044-0:06:48.310	IT2	2.22249	8	8.32601
Trial 1	F1	P	F	0:06:48.310-0:06:48.576	IT1	1.46011	8	5.46994		Trial 1	F5	UP	F	0:06:48.310-0:06:48.576	IT2	1.21873	8	4.56565
Trial 1	F1	P	F	0:06:48.576-0:06:48.842	IT1	1.27762	7	5.47004		Trial 1	F5	UP	F	0:06:48.576-0:06:48.842	IT2	0.351408	7	1.50452
Trial 1	F1	P	F	0:06:48.842-0:06:49.108	IT1	2.80502	8	10.5083		Trial 1	F5	UP	F	0:06:48.842-0:06:49.108	IT2	0.664045	8	2.48768
Trial 1	F1	P	F	0:06:49.108-0:06:49.374	IT1	0.666461	8	2.49673		Trial 1	F5	UP	F	0:06:49.108-0:06:49.374	IT2	0.391489	8	1.46662
Trial 1	F1	P	F	0:06:49.374-0:06:49.640	IT1	0.77228	8	2.89315		Trial 1	F5	UP	F	0:06:49.374-0:06:49.640	IT2	0.413969	8	1.55083
Trial 1	F1	P	F	0:06:49.640-0:06:49.906	IT1	0.767668	8	2.87588		Trial 1	F5	UP	F	0:06:49.640-0:06:49.906	IT2	0.198143	8	0.742298
Trial 1	F1	P	F	0:06:49.906-0:06:50.172	IT1	1.36864	8	5.12726		Trial 1	F5	UP	F	0:06:49.906-0:06:50.172	IT2	0.670934	8	2.51347
Trial 1	F1	P	F	0:06:50.172-0:06:50.438	CS2a	3.95244	8	14.8068		Trial 1	F5	UP	F	0:06:50.172-0:06:50.438	IT2	19.8072	8	74.2027
Trial 1	F1	P	F	0:06:50.438-0:06:50.704	CS2a	4.93481	8	18.4871		Trial 1	F5	UP	F	0:06:50.438-0:06:50.704	IT2	11.1268	8	41.6839
Trial 1	F1	P	F	0:06:50.704-0:06:50.970	CS2a	5.15595	8	19.3155		Trial 1	F5	UP	F	0:06:50.704-0:06:50.970	IT2	20.3511	8	76.2404
Trial 1	F1	P	F	0:06:50.970-0:06:51.236	CS2a	0.878236	8	3.2901		Trial 1	F5	UP	F	0:06:50.970-0:06:51.236	IT2	10.387	8	38.9123
Trial 1	F1	P	F	0:06:51.236-0:06:51.502	CS2a	0.979227	8	3.66845		Trial 1	F5	UP	F	0:06:51.236-0:06:51.502	IT2	3.1337	8	11.7396
Trial 1	F1	P	F	0:06:51.502-0:06:51.768	CS2a	0.110744	8	0.414874		Trial 1	F5	UP	F	0:06:51.502-0:06:51.768	IT2	1.4921	8	5.58978
Trial 1	F1	P	F	0:06:51.768-0:06:52.034	CS2a	1.0464	8	3.92007		Trial 1	F5	UP	F	0:06:51.768-0:06:52.034	IT2	0.308609	8	1.15613
Trial 1	F1	P	F	0:06:52.034-0:06:52.300	CS2a	0.960059	8	3.59664		Trial 1	F5	UP	F	0:06:52.034-0:06:52.300	IT2	0.207504	8	0.777359
Trial 1	F1	P	F	0:06:52.300-0:06:52.566	CS2a	0.182383	8	0.683258		Trial 1	F5	UP	F	0:06:52.300-0:06:52.566	IT2	0.434601	8	1.62812
Trial 1	F1	P	F	0:06:52.566-0:06:52.832	CS2a	0.242005	8	0.906615		Trial 1	F5	UP	F	0:06:52.566-0:06:52.832	IT2	0.220296	8	0.82528
Trial 1	F1	P	F	0:06:52.832-0:06:53.098	CS2a	0.0728398	8	0.272876		Trial 1	F5	UP	F	0:06:52.832-0:06:53.098	IT2	0.316859	8	1.18703
Trial 1	F1	P	F	0:06:53.098-0:06:53.364	CS2a	1.36259	8	5.10462		Trial 1	F5	UP	F	0:06:53.098-0:06:53.364	IT2	0.423087	8	1.58499
Trial 1	F1	P	F	0:06:53.364-0:06:53.630	CS2a	0.918585	8	3.44127		Trial 1	F5	UP	F	0:06:53.364-0:06:53.630	IT2	0.273609	8	1.02501
Trial 1	F1	P	F	0:06:53.630-0:06:53.896	CS2a	5.0769	8	19.0194		Trial 1	F5	UP	F	0:06:53.630-0:06:53.896	IT2	0.202081	8	0.757045
Trial 1	F1	P	F	0:06:53.896-0:06:54.162	CS2a	5.11679	8	19.1687		Trial 1	F5	UP	F	0:06:53.896-0:06:54.162	IT2	0.105719	8	0.39605
Trial 1	F1	P	F	0:06:54.162-0:06:54.428	CS2a	2.9114	8	10.9068		Trial 1	F5	UP	F	0:06:54.162-0:06:54.428	IT2	0.100595	8	0.376854
Trial 1	F1	P	F	0:06:54.428-0:06:54.694	CS2a	0.8096	8	3.03298		Trial 1	F5	UP	F	0:06:54.428-0:06:54.694	IT2	0.106067	8	0.397355
Trial 1	F1	P	F	0:06:54.694-0:06:54.960	CS2a	0.519096	8	1.94466		Trial 1	F5	UP	F	0:06:54.694-0:06:54.960	IT2	0.0407683	8	0.152729
Trial 1	F1	P	F	0:06:54.960-0:06:55.226	CS2a	0.550238	8	2.06133		Trial 1	F5	UP	F	0:06:54.960-0:06:55.226	IT2	0.0661645	8	0.247869
Trial 1	F1	P	F	0:06:55.226-0:06:55.492	CS2a	0.22057	8	0.826312		Trial 1	F5	UP	F	0:06:55.226-0:06:55.492	IT2	0.0706989	8	0.264856
Trial 1	F1	P	F	0:06:55.492-0:06:55.758	CS2a	0.333395	8	1.24898		Trial 1	F5	UP	F	0:06:55.492-0:06:55.758	IT2	0.129462	8	0.484994
Trial 1	F1	P	F	0:06:55.758-0:06:56.024	CS2a	0.110308	8	0.413242		Trial 1	F5	UP	F	0:06:55.758-0:06:56.024	IT2	0.0725408	8	0.271756
Trial 1	F1	P	F	0:06:56.024-0:06:56.290	CS2a	0.269213	8	1.00854		Trial 1	F5	UP	F	0:06:56.024-0:06:56.290	IT2	0.0994963	8	0.372738
Trial 1	F1	P	F	0:06:56.290-0:06:56.556	CS2a	0.119589	8	0.448009		Trial 1	F5	UP	F	0:06:56.290-0:06:56.556	IT2	0.316353	8	1.18514
Trial 1	F1	P	F	0:06:56.556-0:06:56.822	CS2a	0.0835112	8	0.312853		Trial 1	F5	UP	F	0:06:56.556-0:06:56.822	IT2	0.462216	8	1.73157
Trial 1	F1	P	F	0:06:56.822-0:06:57.088	CS2a	0.117779	8	0.441233		Trial 1	F5	UP	F	0:06:56.822-0:06:57.088	IT2	0.227275	8	0.851431
Trial 1	F1	P	F	0:06:57.088-0:06:57.354	CS2a	0.0434772	8	0.162877		Trial 1	F5	UP	F	0:06:57.088-0:06:57.354	IT2	0.127161	8	0.476379
Trial 1	F1	P	F	0:06:57.354-0:06:57.620	CS2a	0.281787	8	1.05564		Trial 1	F5	UP	F	0:06:57.354-0:06:57.620	IT2	0.108058	8	0.40481
Trial 1	F1	P	F	0:06:57.620-0:06:57.886	CS2a	0.0789145	8	0.295634		Trial 1	F5	UP	F	0:06:57.620-0:06:57.886	IT2	0.0547047	8	0.204939
Trial 1	F1	P	F	0:06:57.886-0:06:58.152	CS2a	0.146067	8	0.547199		Trial 1	F5	UP	F	0:06:57.886-0:06:58.152	IT2	0.0540396	8	0.202446
Trial 1	F1	P	F	0:06:58.152-0:06:58.418	CS2a	0.121981	7	0.522256		Trial 1	F5	UP	F	0:06:58.152-0:06:58.418	IT2	0.0586622	7	0.251157
Trial 1	F1	P	F	0:06:58.418-0:06:58.684	CS2a	0.15764	8	0.590565		Trial 1	F5	UP	F	0:06:58.418-0:06:58.684	IT2	0.125339	8	0.469551
Trial 1	F1	P	F	0:06:58.684-0:06:58.950	CS2a	0.132876	8	0.497786		Trial 1	F5	UP	F	0:06:58.684-0:06:58.950	IT2	0.0828421	8	0.310345
Trial 1	F1	P	F	0:06:58.950-0:06:59.216	CS2a	0.0471749	8	0.176728		Trial 1	F5	UP	F	0:06:58.950-0:06:59.216	IT2	0.251608	8	0.942585
Trial 1	F1	P	F	0:06:59.216-0:06:59.482	CS2a	0.187985	8	0.704245		Trial 1	F5	UP	F	0:06:59.216-0:06:59.482	IT2	0.212708	8	0.796863
Trial 1	F1	P	F	0:06:59.482-0:06:59.748	CS2a	0.0697366	8	0.261249		Trial 1	F5	UP	F	0:06:59.482-0:06:59.748	IT2	0.160112	8	0.599819
Trial 1	F1	P	F	0:06:59.748-0:07:00.014	CS2a	0.190583	8	0.713971		Trial 1	F5	UP	F	0:06:59.748-0:07:00.014	IT2	0.0975634	8	0.365497
Trial 1	F1	P	F	0:07:00.014-0:07:00.280	IT2	0.464274	8	1.73927		Trial 1	F5	UP	F	0:07:00.014-0:07:00.280	IT2	0.0341422	8	0.127905
Trial 1	F1	P	F	0:07:00.280-0:07:00.546	IT2	2.59873	8	9.73549		Trial 1	F5	UP	F	0:07:00.280-0:07:00.546	IT2	0.0422159	8	0.158153
Trial 1	F1	P	F	0:07:00.546-0:07:00.812	IT2	3.80461	8	14.253		Trial 1	F5	UP	F	0:07:00.546-0:07:00.812	IT2	0.0474086	8	0.177605
Trial 1	F1	P	F	0:07:00.812-0:07:01.078	IT2	10.042	8	37.62		Trial 1	F5	UP	F	0:07:00.812-0:07:01.078	IT2	0.0309964	8	0.11612
Trial 1	F1	P	F	0:07:01.078-0:07:01.344	IT2	2.22342	8	8.32952		Trial 1	F5	UP	F	0:07:01.078-0:07:01.344	IT2	0.0491242	8	0.184032
Trial 1	F1	P	F	0:07:01.344-0:07:01.610	IT2	3.9651	8	14.8543		Trial 1	F5	UP	F	0:07:01.344-0:07:01.610	IT2	0.323027	8	1.21014
Trial 1	F1	P	F	0:07:01.610-0:07:01.876	IT2	2.913	8	10.9128		Trial 1	F5	UP	F	0:07:01.610-0:07:01.876	IT2	0.147891	8	0.554037
Trial 1	F1	P	F	0:07:01.876-0:07:02.142	IT2	0.772576	8	2.89428		Trial 1	F5	UP	F	0:07:01.876-0:07:02.142	IT2	0.0609906	8	0.228486
Trial 1	F1	P	F	0:07:02.142-0:07:02.408	IT2	0.525807	8	1.9698		Trial 1	F5	UP	F	0:07:02.142-0:07:02.408	IT2	0.0724466	8	0.271403
Trial 1	F1	P	F	0:07:02.408-0:07:02.674	IT2	0.625422	8	2.34299		Trial 1	F5	UP	F	0:07:02.408-0:07:02.674	IT2	0.0700949	8	0.262596
Trial 1	F1	P	F	0:07:02.674-0:07:02.940	IT2	1.1924	8	4.46702		Trial 1	F5	UP	F	0:07:02.674-0:07:02.940	IT2	0.0801682	8	0.300329
Trial 1	F1	P	F	0:07:02.940-0:07:03.206	IT2	1.48639	8	5.56837		Trial 1	F5	UP	F	0:07:02.940-0:07:03.206	IT2	0.0463696	8	0.173712
Trial 1	F1	P	F	0:07:03.206-0:07:03.472	IT2	1.43749	8	5.3852		Trial 1	F5	UP	F	0:07:03.206-0:07:03.472	IT2	0.0689462	8	0.258289
Trial 1	F1	P	F	0:07:03.472-0:07:03.738	IT2	1.33746	8	5.01044		Trial 1	F5	UP	F	0:07:03.472-0:07:03.738	IT2	0.0379272	8	0.142085
Trial 1	F1	P	F	0:07:03.738-0:07:04.004	IT2	1.49799	8	5.61186		Trial 1	F5	UP	F	0:07:03.738-0:07:04.004	IT2	0.037184	8	0.139301
Trial 1	F1	P	F	0:07:04.004-0:07:04.270	IT2	0.571086	8	2.13942		Trial 1	F5	UP	F	0:07:04.004-0:07:04.270	IT2	0.281246	8	1.05362
Trial 1	F1	P	F	0:07:04.270-0:07:04.536	IT2	0.528838	8	1.98116		Trial 1	F5	UP	F	0:07:04.270-0:07:04.536	IT2	0.30329	8	1.1362
Trial 1	F1	P	F	0:07:04.536-0:07:04.802	IT2	0.412576	8	1.54562		Trial 1	F5	UP	F	0:07:04.536-0:07:04.802	IT2	0.231107	8	0.865788
Trial 1	F1	P	F	0:07:04.802-0:07:05.068	IT2	0.221133	8	0.828424		Trial 1	F5	UP	F	0:07:04.802-0:07:05.068	IT2	0.262811	8	0.984552
Trial 1	F1	P	F	0:07:05.068-0:07:05.334	IT2	0.195638	8	0.732909		Trial 1	F5	UP	F	0:07:05.068-0:07:05.334	IT2	0.351516	8	1.31687
Trial 1	F1	P	F	0:07:05.334-0:07:05.600	IT2	0.175184	8	0.65628		Trial 1	F5	UP	F	0:07:05.334-0:07:05.600	IT2	0.601296	8	2.2526
Trial 1	F1	P	F	0:07:05.600-0:07:05.866	IT2	0.127551	8	0.477836		Trial 1	F5	UP	F	0:07:05.600-0:07:05.866	IT2	0.787474	8	2.95007
Trial 1	F1	P	F	0:07:05.866-0:07:06.132	IT2	0.218852	8	0.819876		Trial 1	F5	UP	F	0:07:05.866-0:07:06.132	IT2	0.244779	8	0.917004
Trial 1	F1	P	F	0:07:06.132-0:07:06.398	IT2	0.264332	8	0.990251		Trial 1	F5	UP	F	0:07:06.132-0:07:06.398	IT2	0.17481	8	0.654887
Trial 1	F1	P	F	0:07:06.398-0:07:06.664	IT2	0.298062	8	1.11662		Trial 1	F5	UP	F	0:07:06.398-0:07:06.664	IT2	0.799607	8	2.99554
Trial 1	F1	P	F	0:07:06.664-0:07:06.930	IT2	0.278103	8	1.04184		Trial 1	F5	UP	F	0:07:06.664-0:07:06.930	IT2	1.05166	8	3.93979
Trial 1	F1	P	F	0:07:06.930-0:07:07.196	IT2	0.39752	8	1.48922		Trial 1	F5	UP	F	0:07:06.930-0:07:07.196	IT2	0.293511	8	1.09957
Trial 1	F1	P	F	0:07:07.196-0:07:07.462	IT2	0.303342	8	1.1364		Trial 1	F5	UP	F	0:07:07.196-0:07:07.462	IT2	0.125491	8	0.47012
Trial 1	F1	P	F	0:07:07.462-0:07:07.728	IT2	0.485704	8	1.81956		Trial 1	F5	UP	F	0:07:07.462-0:07:07.728	IT2	0.218224	8	0.817521
Trial 1	F1	P	F	0:07:07.728-0:07:07.994	IT2	0.511932	7	2.1918		Trial 1	F5	UP	F	0:07:07.728-0:07:07.994	IT2	0.144954	7	0.62061
Trial 1	F1	P	F	0:07:07.994-0:07:08.260	IT2	0.59262	8	2.22011		Trial 1	F5	UP	F	0:07:07.994-0:07:08.260	IT2	0.131489	8	0.492593
Trial 1	F1	P	F	0:07:08.260-0:07:08.526	IT2	0.430907	8	1.61429		Trial 1	F5	UP	F	0:07:08.260-0:07:08.526	IT2	0.0734279	8	0.275079
Trial 1	F1	P	F	0:07:08.526-0:07:08.792	IT2	0.341712	8	1.28014		Trial 1	F5	UP	F	0:07:08.526-0:07:08.792	IT2	0.0478529	8	0.179269
Trial 1	F1	P	F	0:07:08.792-0:07:09.058	IT2	0.264815	8	0.99207		Trial 1	F5	UP	F	0:07:08.792-0:07:09.058	IT2	0.0926789	8	0.347198
Trial 1	F1	P	F	0:07:09.058-0:07:09.324	IT2	0.0842066	8	0.315458		Trial 1	F5	UP	F	0:07:09.058-0:07:09.324	IT2	0.0343957	8	0.128854
Trial 1	F1	P	F	0:07:09.324-0:07:09.590	IT2	0.215706	8	0.808087		Trial 1	F5	UP	F	0:07:09.324-0:07:09.590	IT2	0.0483644	8	0.181184
Trial 1	F1	P	F	0:07:09.590-0:07:09.856	IT2	0.270409	8	1.01302		Trial 1	F5	UP	F	0:07:09.590-0:07:09.856	IT2	0.032358	8	0.121221
Trial 1	F1	P	F	0:07:09.856-0:07:10.122	IT2	0.22308	8	0.835712		Trial 1	F5	UP	F	0:07:09.856-0:07:10.122	IT2	0.0472383	8	0.176966
Trial 1	F1	P	F	0:07:10.122-0:07:10.388	IT2	0.0777247	8	0.291177		Trial 1	F5	UP	F	0:07:10.122-0:07:10.388	IT2	0.0334076	8	0.125155
Trial 1	F1	P	F	0:07:10.388-0:07:10.654	IT2	0.725509	8	2.71794		Trial 1	F5	UP	F	0:07:10.388-0:07:10.654	IT2	0.0786673	8	0.294706
Trial 1	F1	P	F	0:07:10.654-0:07:10.920	IT2	1.3636	8	5.1084		Trial 1	F5	UP	F	0:07:10.654-0:07:10.920	IT2	0.0455781	8	0.170747
Trial 1	F1	P	F	0:07:10.920-0:07:11.186	IT2	0.274366	8	1.02784		Trial 1	F5	UP	F	0:07:10.920-0:07:11.186	IT2	0.0466012	8	0.174578
Trial 1	F1	P	F	0:07:11.186-0:07:11.452	IT2	0.289674	8	1.08519		Trial 1	F5	UP	F	0:07:11.186-0:07:11.452	IT2	0.0676845	8	0.253564
Trial 1	F1	P	F	0:07:11.452-0:07:11.718	IT2	0.337663	8	1.26498		Trial 1	F5	UP	F	0:07:11.452-0:07:11.718	IT2	0.0446372	8	0.167223
Trial 1	F1	P	F	0:07:11.718-0:07:11.984	IT2	0.536593	8	2.01022		Trial 1	F5	UP	F	0:07:11.718-0:07:11.984	IT2	0.0738651	8	0.276717
Trial 1	F1	P	F	0:07:11.984-0:07:12.250	IT2	0.538885	8	2.0188		Trial 1	F5	UP	F	0:07:11.984-0:07:12.250	IT2	0.19215	8	0.719844
Trial 1	F1	P	F	0:07:12.250-0:07:12.516	IT2	0.196834	8	0.737387		Trial 1	F5	UP	F	0:07:12.250-0:07:12.516	IT2	0.529304	8	1.98291
Trial 1	F1	P	F	0:07:12.516-0:07:12.782	IT2	0.245351	8	0.919147		Trial 1	F5	UP	F	0:07:12.516-0:07:12.782	IT2	0.255514	8	0.957218
Trial 1	F1	P	F	0:07:12.782-0:07:13.048	IT2	0.265612	8	0.995051		Trial 1	F5	UP	F	0:07:12.782-0:07:13.048	IT2	0.46067	8	1.72579
Trial 1	F1	P	F	0:07:13.048-0:07:13.314	IT2	0.227097	8	0.850761		Trial 1	F5	UP	F	0:07:13.048-0:07:13.314	IT2	0.490422	8	1.83724
Trial 1	F1	P	F	0:07:13.314-0:07:13.580	IT2	0.183183	8	0.686247		Trial 1	F5	UP	F	0:07:13.314-0:07:13.580	IT2	0.249596	8	0.93505
Trial 1	F1	P	F	0:07:13.580-0:07:13.846	IT2	0.199094	8	0.745859		Trial 1	F5	UP	F	0:07:13.580-0:07:13.846	IT2	0.686045	8	2.57009
Trial 1	F1	P	F	0:07:13.846-0:07:14.112	IT2	0.204089	8	0.76457		Trial 1	F5	UP	F	0:07:13.846-0:07:14.112	IT2	1.017	8	3.80993
Trial 1	F1	P	F	0:07:14.112-0:07:14.378	IT2	0.17375	8	0.650913		Trial 1	F5	UP	F	0:07:14.112-0:07:14.378	IT2	0.29266	8	1.09638
Trial 1	F1	P	F	0:07:14.378-0:07:14.644	IT2	0.168963	8	0.632973		Trial 1	F5	UP	F	0:07:14.378-0:07:14.644	IT2	0.277437	8	1.03935
Trial 1	F1	P	F	0:07:14.644-0:07:14.910	IT2	0.244932	8	0.917583		Trial 1	F5	UP	F	0:07:14.644-0:07:14.910	IT2	0.153294	8	0.57428
Trial 1	F1	P	F	0:07:14.910-0:07:15.176	IT2	0.123086	8	0.461112		Trial 1	F5	UP	F	0:07:14.910-0:07:15.176	IT2	0.0620058	8	0.232289
Trial 1	F1	P	F	0:07:15.176-0:07:15.442	IT2	0.359648	8	1.34733		Trial 1	F5	UP	F	0:07:15.176-0:07:15.442	IT2	0.0531598	8	0.199151
Trial 1	F1	P	F	0:07:15.442-0:07:15.708	IT2	0.231101	8	0.865765		Trial 1	F5	UP	F	0:07:15.442-0:07:15.708	IT2	0.025798	8	0.096646
Trial 1	F1	P	F	0:07:15.708-0:07:15.974	IT2	0.205429	8	0.769585		Trial 1	F5	UP	F	0:07:15.708-0:07:15.974	IT2	0.0400538	8	0.150051
Trial 1	F1	P	F	0:07:15.974-0:07:16.240	IT2	0.250224	8	0.937402		Trial 1	F5	UP	F	0:07:15.974-0:07:16.240	IT2	0.0788898	8	0.29554
Trial 1	F1	P	F	0:07:16.240-0:07:16.506	IT2	0.152953	8	0.573001		Trial 1	F5	UP	F	0:07:16.240-0:07:16.506	IT2	0.0332307	8	0.12449
Trial 1	F1	P	F	0:07:16.506-0:07:16.772	IT2	0.105509	8	0.395265		Trial 1	F5	UP	F	0:07:16.506-0:07:16.772	IT2	0.419465	8	1.57142
Trial 1	F1	P	F	0:07:16.772-0:07:17.038	IT2	0.176123	8	0.659801		Trial 1	F5	UP	F	0:07:16.772-0:07:17.038	IT2	0.0965638	8	0.361751
Trial 1	F1	P	F	0:07:17.038-0:07:17.304	IT2	0.159209	8	0.596437		Trial 1	F5	UP	F	0:07:17.038-0:07:17.304	IT2	0.116278	8	0.435608
Trial 1	F1	P	F	0:07:17.304-0:07:17.570	IT2	0.145025	7	0.620911		Trial 1	F5	UP	F	0:07:17.304-0:07:17.570	IT2	0.103048	7	0.441191
Trial 1	F1	P	F	0:07:17.570-0:07:17.836	IT2	0.254429	8	0.953156		Trial 1	F5	UP	F	0:07:17.570-0:07:17.836	IT2	0.271074	8	1.01551
Trial 1	F1	P	F	0:07:17.836-0:07:18.102	IT2	0.434649	8	1.62829		Trial 1	F5	UP	F	0:07:17.836-0:07:18.102	IT2	0.349826	8	1.31053
Trial 1	F1	P	F	0:07:18.102-0:07:18.368	IT2	0.372553	8	1.39568		Trial 1	F5	UP	F	0:07:18.102-0:07:18.368	IT2	0.490103	8	1.83605
Trial 1	F1	P	F	0:07:18.368-0:07:18.634	IT2	0.493386	8	1.84834		Trial 1	F5	UP	F	0:07:18.368-0:07:18.634	IT2	0.192359	8	0.720623
Trial 1	F1	P	F	0:07:18.634-0:07:18.900	IT2	0.319976	8	1.19871		Trial 1	F5	UP	F	0:07:18.634-0:07:18.900	IT2	0.221349	8	0.829227
Trial 1	F1	P	F	0:07:18.900-0:07:19.166	IT2	0.455634	8	1.70692		Trial 1	F5	UP	F	0:07:18.900-0:07:19.166	IT2	0.142397	8	0.533456
Trial 1	F1	P	F	0:07:19.166-0:07:19.432	IT2	0.574738	8	2.15311		Trial 1	F5	UP	F	0:07:19.166-0:07:19.432	IT2	0.0651363	8	0.244016
Trial 1	F1	P	F	0:07:19.432-0:07:19.698	IT2	0.459885	8	1.72284		Trial 1	F5	UP	F	0:07:19.432-0:07:19.698	IT2	0.0698642	8	0.261729
Trial 1	F1	P	F	0:07:19.698-0:07:19.964	IT2	0.58419	8	2.18852		Trial 1	F5	UP	F	0:07:19.698-0:07:19.964	IT2	0.0918745	8	0.344185
Trial 1	F1	P	F	0:07:19.964-0:07:20.230	IT2	0.414355	8	1.55228		Trial 1	F5	UP	F	0:07:19.964-0:07:20.230	IT2	0.0476079	8	0.178351
Trial 1	F1	P	F	0:07:20.230-0:07:20.496	IT2	0.185285	8	0.694132		Trial 1	F5	UP	F	0:07:20.230-0:07:20.496	IT2	0.0540876	8	0.202626
Trial 1	F1	P	F	0:07:20.496-0:07:20.762	IT2	1.05576	8	3.95512		Trial 1	F5	UP	F	0:07:20.496-0:07:20.762	IT2	0.0412165	8	0.154407
Trial 1	F1	P	F	0:07:20.762-0:07:21.028	IT2	0.60476	8	2.26559		Trial 1	F5	UP	F	0:07:20.762-0:07:21.028	IT2	0.0919143	8	0.344334
Trial 1	F1	P	F	0:07:21.028-0:07:21.294	IT2	0.18802	8	0.70437		Trial 1	F5	UP	F	0:07:21.028-0:07:21.294	IT2	0.0445257	8	0.166804
Trial 1	F1	P	F	0:07:21.294-0:07:21.560	IT2	0.139585	8	0.522918		Trial 1	F5	UP	F	0:07:21.294-0:07:21.560	IT2	0.0597437	8	0.223814
Trial 1	F1	P	F	0:07:21.560-0:07:21.826	IT2	0.122852	8	0.460237		Trial 1	F5	UP	F	0:07:21.560-0:07:21.826	IT2	0.129078	8	0.48356
Trial 1	F1	P	F	0:07:21.826-0:07:22.092	IT2	0.372767	8	1.39647		Trial 1	F5	UP	F	0:07:21.826-0:07:22.092	IT2	0.101084	8	0.378685
Trial 1	F1	P	F	0:07:22.092-0:07:22.358	IT2	0.787631	8	2.95067		Trial 1	F5	UP	F	0:07:22.092-0:07:22.358	IT2	0.380116	8	1.42401
Trial 1	F1	P	F	0:07:22.358-0:07:22.624	IT2	0.496706	8	1.86078		Trial 1	F5	UP	F	0:07:22.358-0:07:22.624	IT2	0.338091	8	1.26657
Trial 1	F1	P	F	0:07:22.624-0:07:22.890	IT2	0.782234	8	2.93044		Trial 1	F5	UP	F	0:07:22.624-0:07:22.890	IT2	0.165754	8	0.620956
Trial 1	F1	P	F	0:07:22.890-0:07:23.156	IT2	0.897386	8	3.36184		Trial 1	F5	UP	F	0:07:22.890-0:07:23.156	IT2	0.200971	8	0.752891
Trial 1	F1	P	F	0:07:23.156-0:07:23.422	IT2	2.60431	8	9.75639		Trial 1	F5	UP	F	0:07:23.156-0:07:23.422	IT2	0.0938117	8	0.351444
Trial 1	F1	P	F	0:07:23.422-0:07:23.688	IT2	2.37263	8	8.88848		Trial 1	F5	UP	F	0:07:23.422-0:07:23.688	IT2	0.0475887	8	0.17828
Trial 1	F1	P	F	0:07:23.688-0:07:23.954	IT2	2.10183	8	7.87396		Trial 1	F5	UP	F	0:07:23.688-0:07:23.954	IT2	0.0587379	8	0.220047
Trial 1	F1	P	F	0:07:23.954-0:07:24.220	IT2	0.981097	8	3.67544		Trial 1	F5	UP	F	0:07:23.954-0:07:24.220	IT2	0.0342433	8	0.128284
Trial 1	F1	P	F	0:07:24.220-0:07:24.486	IT2	0.228787	8	0.857094		Trial 1	F5	UP	F	0:07:24.220-0:07:24.486	IT2	0.0590203	8	0.221105
Trial 1	F1	P	F	0:07:24.486-0:07:24.752	IT2	0.151139	8	0.566203		Trial 1	F5	UP	F	0:07:24.486-0:07:24.752	IT2	0.0405455	8	0.151893
Trial 1	F1	P	F	0:07:24.752-0:07:25.018	IT2	0.227576	8	0.852555		Trial 1	F5	UP	F	0:07:24.752-0:07:25.018	IT2	0.098565	8	0.369252
Trial 1	F1	P	F	0:07:25.018-0:07:25.284	IT2	0.194231	8	0.727631		Trial 1	F5	UP	F	0:07:25.018-0:07:25.284	IT2	0.270116	8	1.01192
Trial 1	F1	P	F	0:07:25.284-0:07:25.550	IT2	0.602854	8	2.25843		Trial 1	F5	UP	F	0:07:25.284-0:07:25.550	IT2	0.0996301	8	0.373238
Trial 1	F1	P	F	0:07:25.550-0:07:25.816	IT2	1.75174	8	6.56246		Trial 1	F5	UP	F	0:07:25.550-0:07:25.816	IT2	0.0883135	8	0.330845
Trial 1	F1	P	F	0:07:25.816-0:07:26.082	IT2	2.67278	8	10.0129		Trial 1	F5	UP	F	0:07:25.816-0:07:26.082	IT2	0.111402	8	0.417342
Trial 1	F1	P	F	0:07:26.082-0:07:26.348	IT2	1.26272	8	4.73048		Trial 1	F5	UP	F	0:07:26.082-0:07:26.348	IT2	0.128399	8	0.481018
Trial 1	F1	P	F	0:07:26.348-0:07:26.614	IT2	0.88146	8	3.30217		Trial 1	F5	UP	F	0:07:26.348-0:07:26.614	IT2	0.0529882	8	0.198506
Trial 1	F1	P	F	0:07:26.614-0:07:26.880	IT2	0.38643	7	1.65446		Trial 1	F5	UP	F	0:07:26.614-0:07:26.880	IT2	0.0622699	7	0.266603
Trial 1	F1	P	F	0:07:26.880-0:07:27.146	IT2	0.169107	8	0.633516		Trial 1	F5	UP	F	0:07:26.880-0:07:27.146	IT2	0.0748038	8	0.280233
Trial 1	F1	P	F	0:07:27.146-0:07:27.412	IT2	0.202852	8	0.759931		Trial 1	F5	UP	F	0:07:27.146-0:07:27.412	IT2	0.034462	8	0.129103
Trial 1	F1	P	F	0:07:27.412-0:07:27.678	IT2	0.236035	8	0.884249		Trial 1	F5	UP	F	0:07:27.412-0:07:27.678	IT2	0.151926	8	0.569154
Trial 1	F1	P	F	0:07:27.678-0:07:27.944	IT2	0.282534	8	1.05845		Trial 1	F5	UP	F	0:07:27.678-0:07:27.944	IT2	0.267431	8	1.00187
Trial 1	F1	P	F	0:07:27.944-0:07:28.210	IT2	1.23495	8	4.62643		Trial 1	F5	UP	F	0:07:27.944-0:07:28.210	IT2	0.201263	8	0.753979
Trial 1	F1	P	F	0:07:28.210-0:07:28.476	IT2	0.709881	8	2.65939		Trial 1	F5	UP	F	0:07:28.210-0:07:28.476	IT2	0.232027	8	0.869228
Trial 1	F1	P	F	0:07:28.476-0:07:28.742	IT2	1.21106	8	4.53696		Trial 1	F5	UP	F	0:07:28.476-0:07:28.742	IT2	0.260091	8	0.974365
Trial 1	F1	P	F	0:07:28.742-0:07:29.008	IT2	1.02539	8	3.84138		Trial 1	F5	UP	F	0:07:28.742-0:07:29.008	IT2	0.375291	8	1.40593
Trial 1	F1	P	F	0:07:29.008-0:07:29.274	IT2	0.626849	8	2.34835		Trial 1	F5	UP	F	0:07:29.008-0:07:29.274	IT2	0.156047	8	0.584593
Trial 1	F1	P	F	0:07:29.274-0:07:29.540	IT2	1.0809	8	4.0493		Trial 1	F5	UP	F	0:07:29.274-0:07:29.540	IT2	0.0880251	8	0.329766
Trial 1	F1	P	F	0:07:29.540-0:07:29.806	IT2	0.290829	8	1.08952		Trial 1	F5	UP	F	0:07:29.540-0:07:29.806	IT2	0.101834	8	0.381494
Trial 1	F1	P	F	0:07:29.806-0:07:30.072	IT2	1.01296	8	3.79481		Trial 1	F5	UP	F	0:07:29.806-0:07:30.072	IT2	0.0394203	8	0.147678
Trial 1	F1	P	F	0:07:30.072-0:07:30.338	IT2	0.468405	8	1.75476		Trial 1	F5	UP	F	0:07:30.072-0:07:30.338	IT2	0.0728045	8	0.272743
Trial 1	F1	P	F	0:07:30.338-0:07:30.604	IT2	0.847652	8	3.17552		Trial 1	F5	UP	F	0:07:30.338-0:07:30.604	IT2	0.206374	8	0.773134
Trial 1	F1	P	F	0:07:30.604-0:07:30.870	IT2	0.331734	8	1.24276		Trial 1	F5	UP	F	0:07:30.604-0:07:30.870	IT2	0.0850114	8	0.318474
Trial 1	F1	P	F	0:07:30.870-0:07:31.136	IT2	0.366833	8	1.37425		Trial 1	F5	UP	F	0:07:30.870-0:07:31.136	IT2	0.052263	8	0.19579
Trial 1	F1	P	F	0:07:31.136-0:07:31.402	IT2	0.136599	8	0.511733		Trial 1	F5	UP	F	0:07:31.136-0:07:31.402	IT2	0.062839	8	0.235411
Trial 1	F1	P	F	0:07:31.402-0:07:31.668	IT2	0.0725448	8	0.271769		Trial 1	F5	UP	F	0:07:31.402-0:07:31.668	IT2	0.0319355	8	0.119638
Trial 1	F1	P	F	0:07:31.668-0:07:31.934	IT2	0.362262	8	1.35713		Trial 1	F5	UP	F	0:07:31.668-0:07:31.934	IT2	0.516367	8	1.93444
Trial 1	F1	P	F	0:07:31.934-0:07:32.200	IT2	1.27098	8	4.76143		Trial 1	F5	UP	F	0:07:31.934-0:07:32.200	IT2	0.420548	8	1.57548
Trial 1	F1	P	F	0:07:32.200-0:07:32.466	IT2	2.88175	8	10.7957		Trial 1	F5	UP	F	0:07:32.200-0:07:32.466	IT2	0.510908	8	1.91399
Trial 1	F1	P	F	0:07:32.466-0:07:32.732	IT2	2.51227	8	9.4116		Trial 1	F5	UP	F	0:07:32.466-0:07:32.732	IT2	0.341132	8	1.27797
Trial 1	F1	P	F	0:07:32.732-0:07:32.998	IT2	1.94797	8	7.29758		Trial 1	F5	UP	F	0:07:32.732-0:07:32.998	IT2	0.577302	8	2.16272
Trial 1	F1	P	F	0:07:32.998-0:07:33.264	IT2	1.63849	8	6.13817		Trial 1	F5	UP	F	0:07:32.998-0:07:33.264	IT2	0.330867	8	1.23952
Trial 1	F1	P	F	0:07:33.264-0:07:33.530	IT2	0.996904	8	3.73464		Trial 1	F5	UP	F	0:07:33.264-0:07:33.530	IT2	0.567382	8	2.12554
Trial 1	F1	P	F	0:07:33.530-0:07:33.796	IT2	1.17032	8	4.38432		Trial 1	F5	UP	F	0:07:33.530-0:07:33.796	IT2	0.0970532	8	0.363584
Trial 1	F1	P	F	0:07:33.796-0:07:34.062	IT2	0.321688	8	1.20512		Trial 1	F5	UP	F	0:07:33.796-0:07:34.062	IT2	0.586031	8	2.19541
Trial 1	F1	P	F	0:07:34.062-0:07:34.328	IT2	0.301081	8	1.12792		Trial 1	F5	UP	F	0:07:34.062-0:07:34.328	IT2	0.682333	8	2.55619
Trial 1	F1	P	F	0:07:34.328-0:07:34.594	IT2	0.153356	8	0.574511		Trial 1	F5	UP	F	0:07:34.328-0:07:34.594	IT2	0.341998	8	1.28122
Trial 1	F1	P	F	0:07:34.594-0:07:34.860	IT2	0.289416	8	1.08422		Trial 1	F5	UP	F	0:07:34.594-0:07:34.860	IT2	0.51507	8	1.92959
Trial 1	F1	P	F	0:07:34.860-0:07:35.126	IT2	0.0893578	8	0.334759		Trial 1	F5	UP	F	0:07:34.860-0:07:35.126	IT2	0.233782	8	0.875802
Trial 1	F1	P	F	0:07:35.126-0:07:35.392	IT2	0.494328	8	1.85188		Trial 1	F5	UP	F	0:07:35.126-0:07:35.392	IT2	0.187688	8	0.703132
Trial 1	F1	P	F	0:07:35.392-0:07:35.658	IT2	0.233461	8	0.874603		Trial 1	F5	UP	F	0:07:35.392-0:07:35.658	IT2	0.0837441	8	0.313725
Trial 1	F1	P	F	0:07:35.658-0:07:35.924	IT2	0.230257	8	0.862601		Trial 1	F5	UP	F	0:07:35.658-0:07:35.924	IT2	0.0700189	8	0.262309
Trial 1	F1	P	F	0:07:35.924-0:07:36.190	IT2	0.340773	8	1.27662		Trial 1	F5	UP	F	0:07:35.924-0:07:36.190	IT2	0.143075	8	0.535995
Trial 1	F1	P	F	0:07:36.190-0:07:36.456	IT2	0.0934485	7	0.400093		Trial 1	F5	UP	F	0:07:36.190-0:07:36.456	IT2	0.0413137	7	0.176881
Trial 1	F1	P	F	0:07:36.456-0:07:36.722	IT2	0.371939	8	1.39339		Trial 1	F5	UP	F	0:07:36.456-0:07:36.722	IT2	0.205456	8	0.769691
Trial 1	F1	P	F	0:07:36.722-0:07:36.988	IT2	0.30214	8	1.13189		Trial 1	F5	UP	F	0:07:36.722-0:07:36.988	IT2	0.071181	8	0.266661
Trial 1	F1	P	F	0:07:36.988-0:07:37.254	IT2	0.503445	8	1.88602		Trial 1	F5	UP	F	0:07:36.988-0:07:37.254	IT2	0.0903048	8	0.338302
Trial 1	F1	P	F	0:07:37.254-0:07:37.520	IT2	0.387232	8	1.45067		Trial 1	F5	UP	F	0:07:37.254-0:07:37.520	IT2	0.070313	8	0.263411
Trial 1	F1	P	F	0:07:37.520-0:07:37.786	IT2	0.22816	8	0.854741		Trial 1	F5	UP	F	0:07:37.520-0:07:37.786	IT2	0.719568	8	2.69567
Trial 1	F1	P	F	0:07:37.786-0:07:38.052	IT2	0.181144	8	0.678609		Trial 1	F5	UP	F	0:07:37.786-0:07:38.052	IT2	0.487899	8	1.82779
Trial 1	F1	P	F	0:07:38.052-0:07:38.318	IT2	0.305076	8	1.1429		Trial 1	F5	UP	F	0:07:38.052-0:07:38.318	IT2	0.808922	8	3.03043
Trial 1	F1	P	F	0:07:38.318-0:07:38.584	IT2	0.503631	8	1.88672		Trial 1	F5	UP	F	0:07:38.318-0:07:38.584	IT2	1.41395	8	5.29699
Trial 1	F1	P	F	0:07:38.584-0:07:38.850	IT2	0.755379	8	2.82986		Trial 1	F5	UP	F	0:07:38.584-0:07:38.850	IT2	2.04752	8	7.67055
Trial 1	F1	P	F	0:07:38.850-0:07:39.116	IT2	0.380035	8	1.4237		Trial 1	F5	UP	F	0:07:38.850-0:07:39.116	IT2	1.23589	8	4.62993
Trial 1	F1	P	F	0:07:39.116-0:07:39.382	IT2	0.182012	8	0.681865		Trial 1	F5	UP	F	0:07:39.116-0:07:39.382	IT2	2.63607	8	9.87541
Trial 1	F1	P	F	0:07:39.382-0:07:39.648	IT2	0.203809	8	0.763516		Trial 1	F5	UP	F	0:07:39.382-0:07:39.648	IT2	3.31588	8	12.4221
Trial 1	F1	P	F	0:07:39.648-0:07:39.914	IT2	0.122283	8	0.458105		Trial 1	F5	UP	F	0:07:39.648-0:07:39.914	IT2	2.64941	8	9.92532
Trial 1	F1	P	F	0:07:39.914-0:07:40.180	IT2	0.159722	8	0.598357		Trial 1	F5	UP	F	0:07:39.914-0:07:40.180	IT2	1.31877	8	4.94047
Trial 1	F1	P	F	0:07:40.180-0:07:40.446	IT2	0.0889229	8	0.333127		Trial 1	F5	UP	F	0:07:40.180-0:07:40.446	IT2	3.31337	8	12.4127
Trial 1	F1	P	F	0:07:40.446-0:07:40.712	IT2	0.0837246	8	0.313654		Trial 1	F5	UP	F	0:07:40.446-0:07:40.712	IT2	2.2379	8	8.38376
Trial 1	F1	P	F	0:07:40.712-0:07:40.978	IT2	0.0659857	8	0.247198		Trial 1	F5	UP	F	0:07:40.712-0:07:40.978	IT2	1.02378	8	3.83532
Trial 1	F1	P	F	0:07:40.978-0:07:41.244	IT2	0.0974135	8	0.364935		Trial 1	F5	UP	F	0:07:40.978-0:07:41.244	IT2	1.17892	8	4.41655
Trial 1	F1	P	F	0:07:41.244-0:07:41.510	IT2	0.121409	8	0.45483		Trial 1	F5	UP	F	0:07:41.244-0:07:41.510	IT2	0.988304	8	3.70244
Trial 1	F1	P	F	0:07:41.510-0:07:41.776	IT2	0.13439	8	0.503457		Trial 1	F5	UP	F	0:07:41.510-0:07:41.776	IT2	0.554698	8	2.07803
Trial 1	F1	P	F	0:07:41.776-0:07:42.042	IT2	0.19703	8	0.738123		Trial 1	F5	UP	F	0:07:41.776-0:07:42.042	IT2	0.984442	8	3.68796
Trial 1	F1	P	F	0:07:42.042-0:07:42.308	IT2	0.138604	8	0.519246		Trial 1	F5	UP	F	0:07:42.042-0:07:42.308	IT2	0.544933	8	2.04145
Trial 1	F1	P	F	0:07:42.308-0:07:42.574	IT2	0.151677	8	0.56822		Trial 1	F5	UP	F	0:07:42.308-0:07:42.574	IT2	1.00918	8	3.78063
Trial 1	F1	P	F	0:07:42.574-0:07:42.840	IT2	0.111442	8	0.417489		Trial 1	F5	UP	F	0:07:42.574-0:07:42.840	IT2	0.811181	8	3.03888
Trial 1	F1	P	F	0:07:42.840-0:07:43.106	IT2	0.353911	8	1.32584		Trial 1	F5	UP	F	0:07:42.840-0:07:43.106	IT2	0.214739	8	0.804466
Trial 1	F1	P	F	0:07:43.106-0:07:43.372	IT2	0.425134	8	1.59266		Trial 1	F5	UP	F	0:07:43.106-0:07:43.372	IT2	0.185958	8	0.696646
Trial 1	F1	P	F	0:07:43.372-0:07:43.638	IT2	1.14672	8	4.29588		Trial 1	F5	UP	F	0:07:43.372-0:07:43.638	IT2	0.0940526	8	0.352344
Trial 1	F1	P	F	0:07:43.638-0:07:43.904	IT2	1.94729	8	7.29502		Trial 1	F5	UP	F	0:07:43.638-0:07:43.904	IT2	0.180909	8	0.677727
Trial 1	F1	P	F	0:07:43.904-0:07:44.170	IT2	0.638587	8	2.39232		Trial 1	F5	UP	F	0:07:43.904-0:07:44.170	IT2	0.109028	8	0.408446
Trial 1	F1	P	F	0:07:44.170-0:07:44.436	IT2	0.344676	8	1.29124		Trial 1	F5	UP	F	0:07:44.170-0:07:44.436	IT2	0.184321	8	0.690515
Trial 1	F1	P	F	0:07:44.436-0:07:44.702	IT2	0.143468	8	0.537466		Trial 1	F5	UP	F	0:07:44.436-0:07:44.702	IT2	0.0632238	8	0.236853
Trial 1	F1	P	F	0:07:44.702-0:07:44.968	IT2	0.321115	8	1.20298		Trial 1	F5	UP	F	0:07:44.702-0:07:44.968	IT2	0.139653	8	0.523175
Trial 1	F1	P	F	0:07:44.968-0:07:45.234	IT2	0.597041	8	2.23666		Trial 1	F5	UP	F	0:07:44.968-0:07:45.234	IT2	0.0796871	8	0.298527
Trial 1	F1	P	F	0:07:45.234-0:07:45.500	IT2	0.341279	8	1.27852		Trial 1	F5	UP	F	0:07:45.234-0:07:45.500	IT2	0.259059	8	0.970503
Trial 1	F1	P	F	0:07:45.500-0:07:45.766	IT2	0.143743	8	0.538495		Trial 1	F5	UP	F	0:07:45.500-0:07:45.766	IT2	1.11063	8	4.16067
Trial 1	F1	P	F	0:07:45.766-0:07:46.032	IT2	0.397526	7	1.70198		Trial 1	F5	UP	F	0:07:45.766-0:07:46.032	IT2	3.2105	7	13.7455
Trial 1	F1	P	F	0:07:46.032-0:07:46.298	IT2	0.380191	8	1.42429		Trial 1	F5	UP	F	0:07:46.032-0:07:46.298	IT2	4.00309	8	14.9966
Trial 1	F1	P	F	0:07:46.298-0:07:46.564	IT2	0.230146	8	0.862181		Trial 1	F5	UP	F	0:07:46.298-0:07:46.564	IT2	3.5982	8	13.4797
Trial 1	F1	P	F	0:07:46.564-0:07:46.830	IT2	0.165621	8	0.620453		Trial 1	F5	UP	F	0:07:46.564-0:07:46.830	IT2	2.01738	8	7.55761
Trial 1	F1	P	F	0:07:46.830-0:07:47.096	IT2	0.139035	8	0.520858		Trial 1	F5	UP	F	0:07:46.830-0:07:47.096	IT2	1.10082	8	4.12396
Trial 1	F1	P	F	0:07:47.096-0:07:47.362	IT2	1.08618	8	4.06908		Trial 1	F5	UP	F	0:07:47.096-0:07:47.362	IT2	0.754773	8	2.82756
Trial 1	F1	P	F	0:07:47.362-0:07:47.628	IT2	0.515094	8	1.92968		Trial 1	F5	UP	F	0:07:47.362-0:07:47.628	IT2	0.462323	8	1.73198
Trial 1	F1	P	F	0:07:47.628-0:07:47.894	IT2	0.389629	8	1.45965		Trial 1	F5	UP	F	0:07:47.628-0:07:47.894	IT2	0.600349	8	2.24905
Trial 1	F1	P	F	0:07:47.894-0:07:48.160	IT2	0.261363	8	0.979132		Trial 1	F5	UP	F	0:07:47.894-0:07:48.160	IT2	1.75606	8	6.57865
Trial 1	F1	P	F	0:07:48.160-0:07:48.426	IT2	0.119755	8	0.448633		Trial 1	F5	UP	F	0:07:48.160-0:07:48.426	IT2	1.33701	8	5.00877
Trial 1	F1	P	F	0:07:48.426-0:07:48.692	IT2	0.0901579	8	0.337752		Trial 1	F5	UP	F	0:07:48.426-0:07:48.692	IT2	2.86742	8	10.7421
Trial 1	F1	P	F	0:07:48.692-0:07:48.958	IT2	0.0676174	8	0.253313		Trial 1	F5	UP	F	0:07:48.692-0:07:48.958	IT2	3.8966	8	14.5977
Trial 1	F1	P	F	0:07:48.958-0:07:49.224	IT2	0.115628	8	0.43317		Trial 1	F5	UP	F	0:07:48.958-0:07:49.224	IT2	0.821248	8	3.07658
Trial 1	F1	P	F	0:07:49.224-0:07:49.490	IT2	0.090965	8	0.340775		Trial 1	F5	UP	F	0:07:49.224-0:07:49.490	IT2	0.272018	8	1.01905
Trial 1	F1	P	F	0:07:49.490-0:07:49.756	IT2	0.103535	8	0.38787		Trial 1	F5	UP	F	0:07:49.490-0:07:49.756	IT2	3.17705	8	11.902
Trial 1	F1	P	F	0:07:49.756-0:07:50.022	IT2	0.116845	8	0.437729		Trial 1	F5	UP	F	0:07:49.756-0:07:50.022	IT2	1.20579	8	4.51718
Trial 1	F1	P	F	0:07:50.022-0:07:50.288	IT2	0.0801633	8	0.300312		Trial 1	F5	UP	F	0:07:50.022-0:07:50.288	IT2	0.407075	8	1.525
Trial 1	F1	P	F	0:07:50.288-0:07:50.554	IT2	0.107538	8	0.402862		Trial 1	F5	UP	F	0:07:50.288-0:07:50.554	IT2	0.25022	8	0.93739
Trial 1	F1	P	F	0:07:50.554-0:07:50.820	IT2	0.0799431	8	0.299486		Trial 1	F5	UP	F	0:07:50.554-0:07:50.820	IT2	0.165173	8	0.618776
Trial 1	F1	P	F	0:07:50.820-0:07:51.086	IT2	0.151168	8	0.566317		Trial 1	F5	UP	F	0:07:50.820-0:07:51.086	IT2	0.211269	8	0.791471
Trial 1	F1	P	F	0:07:51.086-0:07:51.352	IT2	0.0299864	8	0.112336		Trial 1	F5	UP	F	0:07:51.086-0:07:51.352	IT2	0.0787875	8	0.295159
Trial 1	F1	P	F	0:07:51.352-0:07:51.618	IT2	0.11433	8	0.428308		Trial 1	F5	UP	F	0:07:51.352-0:07:51.618	IT2	0.921995	8	3.45401
Trial 1	F1	P	F	0:07:51.618-0:07:51.884	IT2	0.0606779	8	0.227314		Trial 1	F5	UP	F	0:07:51.618-0:07:51.884	IT2	0.469345	8	1.75829
Trial 1	F1	P	F	0:07:51.884-0:07:52.150	IT2	0.0937656	8	0.351267		Trial 1	F5	UP	F	0:07:51.884-0:07:52.150	IT2	0.445984	8	1.67076
Trial 1	F1	P	F	0:07:52.150-0:07:52.416	IT2	0.0859538	8	0.322006		Trial 1	F5	UP	F	0:07:52.150-0:07:52.416	IT2	0.198278	8	0.742804
Trial 1	F1	P	F	0:07:52.416-0:07:52.682	IT2	0.0918294	8	0.344014		Trial 1	F5	UP	F	0:07:52.416-0:07:52.682	IT2	0.255261	8	0.956268
Trial 1	F1	P	F	0:07:52.682-0:07:52.948	IT2	0.129846	8	0.486434		Trial 1	F5	UP	F	0:07:52.682-0:07:52.948	IT2	0.434482	8	1.62769
Trial 1	F1	P	F	0:07:52.948-0:07:53.214	IT2	0.0924986	8	0.346522		Trial 1	F5	UP	F	0:07:52.948-0:07:53.214	IT2	0.141292	8	0.529314
Trial 1	F1	P	F	0:07:53.214-0:07:53.480	IT2	0.136667	8	0.511992		Trial 1	F5	UP	F	0:07:53.214-0:07:53.480	IT2	0.05645	8	0.211477
Trial 1	F1	P	F	0:07:53.480-0:07:53.746	IT2	0.0570058	8	0.213559		Trial 1	F5	UP	F	0:07:53.480-0:07:53.746	IT2	0.044499	8	0.166704
Trial 1	F1	P	F	0:07:53.746-0:07:54.012	IT2	0.183296	8	0.68667		Trial 1	F5	UP	F	0:07:53.746-0:07:54.012	IT2	0.42193	8	1.58065
Trial 1	F1	P	F	0:07:54.012-0:07:54.278	IT2	0.130728	8	0.48974		Trial 1	F5	UP	F	0:07:54.012-0:07:54.278	IT2	0.338812	8	1.26928
Trial 1	F1	P	F	0:07:54.278-0:07:54.544	IT2	0.133472	8	0.500018		Trial 1	F5	UP	F	0:07:54.278-0:07:54.544	IT2	0.596911	8	2.23616
Trial 1	F1	P	F	0:07:54.544-0:07:54.810	IT2	0.0548515	8	0.205487		Trial 1	F5	UP	F	0:07:54.544-0:07:54.810	IT2	0.212907	8	0.797604
Trial 1	F1	P	F	0:07:54.810-0:07:55.076	IT2	0.0742803	8	0.278273		Trial 1	F5	UP	F	0:07:54.810-0:07:55.076	IT2	0.354487	8	1.328
Trial 1	F1	P	F	0:07:55.076-0:07:55.342	IT2	0.0879517	7	0.376557		Trial 1	F5	UP	F	0:07:55.076-0:07:55.342	IT2	0.300036	7	1.28458
Trial 1	F1	P	F	0:07:55.342-0:07:55.608	IT2	0.0701855	8	0.262933		Trial 1	F5	UP	F	0:07:55.342-0:07:55.608	IT2	0.561455	8	2.10335
Trial 1	F1	P	F	0:07:55.608-0:07:55.874	IT2	0.0794107	8	0.297493		Trial 1	F5	UP	F	0:07:55.608-0:07:55.874	IT2	0.433669	8	1.62464
Trial 1	F1	P	F	0:07:55.874-0:07:56.140	IT2	0.0839203	8	0.314387		Trial 1	F5	UP	F	0:07:55.874-0:07:56.140	IT2	0.331831	8	1.24312
Trial 1	F1	P	F	0:07:56.140-0:07:56.406	IT2	0.204925	8	0.767701		Trial 1	F5	UP	F	0:07:56.140-0:07:56.406	IT2	0.209825	8	0.786061
Trial 1	F1	P	F	0:07:56.406-0:07:56.672	IT2	0.218601	8	0.818934		Trial 1	F5	UP	F	0:07:56.406-0:07:56.672	IT2	0.123094	8	0.461142
Trial 1	F1	P	F	0:07:56.672-0:07:56.938	IT2	0.434717	8	1.62855		Trial 1	F5	UP	F	0:07:56.672-0:07:56.938	IT2	0.091653	8	0.343353
Trial 1	F1	P	F	0:07:56.938-0:07:57.204	IT2	0.163675	8	0.613171		Trial 1	F5	UP	F	0:07:56.938-0:07:57.204	IT2	0.088103	8	0.330059
Trial 1	F1	P	F	0:07:57.204-0:07:57.470	IT2	0.203539	8	0.76251		Trial 1	F5	UP	F	0:07:57.204-0:07:57.470	IT2	0.0887091	8	0.332328
Trial 1	F1	P	F	0:07:57.470-0:07:57.736	IT2	0.177948	8	0.666642		Trial 1	F5	UP	F	0:07:57.470-0:07:57.736	IT2	0.0591207	8	0.22148
Trial 1	F1	P	F	0:07:57.736-0:07:58.002	IT2	0.150248	8	0.562866		Trial 1	F5	UP	F	0:07:57.736-0:07:58.002	IT2	0.0397859	8	0.149048
Trial 1	F1	P	F	0:07:58.002-0:07:58.268	IT2	0.10366	8	0.388333		Trial 1	F5	UP	F	0:07:58.002-0:07:58.268	IT2	0.306818	8	1.14942
Trial 1	F1	P	F	0:07:58.268-0:07:58.534	IT2	0.100263	8	0.375613		Trial 1	F5	UP	F	0:07:58.268-0:07:58.534	IT2	0.303348	8	1.13642
Trial 1	F1	P	F	0:07:58.534-0:07:58.800	IT2	0.0944821	8	0.353952		Trial 1	F5	UP	F	0:07:58.534-0:07:58.800	IT2	0.47213	8	1.76871
Trial 1	F1	P	F	0:07:58.800-0:07:59.066	IT2	0.0639707	8	0.23965		Trial 1	F5	UP	F	0:07:58.800-0:07:59.066	IT2	1.5232	8	5.70629
Trial 1	F1	P	F	0:07:59.066-0:07:59.332	IT2	0.134029	8	0.502111		Trial 1	F5	UP	F	0:07:59.066-0:07:59.332	IT2	0.466376	8	1.74716
Trial 1	F1	P	F	0:07:59.332-0:07:59.598	IT2	0.0649011	8	0.243136		Trial 1	F5	UP	F	0:07:59.332-0:07:59.598	IT2	0.279108	8	1.0456
Trial 1	F1	P	F	0:07:59.598-0:07:59.864	IT2	0.0537043	8	0.201189		Trial 1	F5	UP	F	0:07:59.598-0:07:59.864	IT2	0.150423	8	0.563525
Trial 1	F1	P	F	0:07:59.864-0:08:00.130	IT2	0.192044	8	0.719444		Trial 1	F5	UP	F	0:07:59.864-0:08:00.130	IT2	0.219218	8	0.821246
Trial 1	F1	P	F	0:08:00.130-0:08:00.396	IT2	0.124404	8	0.466051		Trial 1	F5	UP	F	0:08:00.130-0:08:00.396	IT2	0.379788	8	1.42279
Trial 1	F1	P	F	0:08:00.396-0:08:00.662	IT2	0.0680079	8	0.254774		Trial 1	F5	UP	F	0:08:00.396-0:08:00.662	IT2	0.221214	8	0.828721
Trial 1	F1	P	F	0:08:00.662-0:08:00.928	IT2	0.0989798	8	0.370803		Trial 1	F5	UP	F	0:08:00.662-0:08:00.928	IT2	0.274642	8	1.02888
Trial 1	F1	P	F	0:08:00.928-0:08:01.194	IT2	0.208164	8	0.77984		Trial 1	F5	UP	F	0:08:00.928-0:08:01.194	IT2	1.03647	8	3.88288
Trial 1	F1	P	F	0:08:01.194-0:08:01.460	IT2	0.139513	8	0.522648		Trial 1	F5	UP	F	0:08:01.194-0:08:01.460	IT2	0.339041	8	1.27013
Trial 1	F1	P	F	0:08:01.460-0:08:01.726	IT2	0.233913	8	0.876296		Trial 1	F5	UP	F	0:08:01.460-0:08:01.726	IT2	0.631059	8	2.36411
Trial 1	F1	P	F	0:08:01.726-0:08:01.992	IT2	0.11146	8	0.417558		Trial 1	F5	UP	F	0:08:01.726-0:08:01.992	IT2	0.359043	8	1.34506
Trial 1	F1	P	F	0:08:01.992-0:08:02.258	IT2	0.115465	8	0.432559		Trial 1	F5	UP	F	0:08:01.992-0:08:02.258	IT2	0.626947	8	2.34869
Trial 1	F1	P	F	0:08:02.258-0:08:02.524	IT2	0.196368	8	0.735648		Trial 1	F5	UP	F	0:08:02.258-0:08:02.524	IT2	0.179385	8	0.672023
Trial 1	F1	P	F	0:08:02.524-0:08:02.790	IT2	0.112974	8	0.423229		Trial 1	F5	UP	F	0:08:02.524-0:08:02.790	IT2	0.137455	8	0.514937
Trial 1	F1	P	F	0:08:02.790-0:08:03.056	IT2	0.100961	8	0.378224		Trial 1	F5	UP	F	0:08:02.790-0:08:03.056	IT2	0.0764564	8	0.286424
Trial 1	F1	P	F	0:08:03.056-0:08:03.322	IT2	0.0699753	8	0.262144		Trial 1	F5	UP	F	0:08:03.056-0:08:03.322	IT2	0.0349488	8	0.130926
Trial 1	F1	P	F	0:08:03.322-0:08:03.588	IT2	0.0984831	8	0.368944		Trial 1	F5	UP	F	0:08:03.322-0:08:03.588	IT2	0.0629922	8	0.235984
Trial 1	F1	P	F	0:08:03.588-0:08:03.854	IT2	0.0517483	8	0.193864		Trial 1	F5	UP	F	0:08:03.588-0:08:03.854	IT2	0.0216651	8	0.0811629
Trial 1	F1	P	F	0:08:03.854-0:08:04.120	IT2	0.0557161	8	0.208726		Trial 1	F5	UP	F	0:08:03.854-0:08:04.120	IT2	0.0342027	8	0.128131
Trial 1	F1	P	F	0:08:04.120-0:08:04.386	IT2	0.11496	8	0.430669		Trial 1	F5	UP	F	0:08:04.120-0:08:04.386	IT2	0.0715931	8	0.268206
Trial 1	F1	P	F	0:08:04.386-0:08:04.652	IT2	0.0901318	8	0.337655		Trial 1	F5	UP	F	0:08:04.386-0:08:04.652	IT2	0.0198148	8	0.0742309
Trial 1	F1	P	F	0:08:04.652-0:08:04.918	IT2	0.0698665	7	0.299128		Trial 1	F5	UP	F	0:08:04.652-0:08:04.918	IT2	0.110985	7	0.475175
Trial 1	F1	P	F	0:08:04.918-0:08:05.184	IT2	0.0958755	8	0.359173		Trial 1	F5	UP	F	0:08:04.918-0:08:05.184	IT2	0.471168	8	1.76512
Trial 1	F1	P	F	0:08:05.184-0:08:05.450	IT2	0.165686	8	0.620706		Trial 1	F5	UP	F	0:08:05.184-0:08:05.450	IT2	0.349109	8	1.30785
Trial 1	F1	P	F	0:08:05.450-0:08:05.716	IT2	0.118117	8	0.442494		Trial 1	F5	UP	F	0:08:05.450-0:08:05.716	IT2	0.64805	8	2.42776
Trial 1	F1	P	F	0:08:05.716-0:08:05.982	IT2	0.0891597	8	0.334015		Trial 1	F5	UP	F	0:08:05.716-0:08:05.982	IT2	0.321715	8	1.20523
Trial 1	F1	P	F	0:08:05.982-0:08:06.248	IT2	0.096497	8	0.361501		Trial 1	F5	UP	F	0:08:05.982-0:08:06.248	IT2	0.0769589	8	0.288307
Trial 1	F1	P	F	0:08:06.248-0:08:06.514	IT2	0.200497	8	0.751109		Trial 1	F5	UP	F	0:08:06.248-0:08:06.514	IT2	0.104222	8	0.39044
Trial 1	F1	P	F	0:08:06.514-0:08:06.780	IT2	0.124927	8	0.468008		Trial 1	F5	UP	F	0:08:06.514-0:08:06.780	IT2	0.0867135	8	0.324849
Trial 1	F1	P	F	0:08:06.780-0:08:07.046	IT2	0.245032	8	0.917947		Trial 1	F5	UP	F	0:08:06.780-0:08:07.046	IT2	0.049477	8	0.185353
Trial 1	F1	P	F	0:08:07.046-0:08:07.312	IT2	0.478163	8	1.79132		Trial 1	F5	UP	F	0:08:07.046-0:08:07.312	IT2	0.136021	8	0.509569
Trial 1	F1	P	F	0:08:07.312-0:08:07.578	IT2	0.179145	8	0.671118		Trial 1	F5	UP	F	0:08:07.312-0:08:07.578	IT2	0.028461	8	0.106623
Trial 1	F1	P	F	0:08:07.578-0:08:07.844	IT2	0.0944444	8	0.353812		Trial 1	F5	UP	F	0:08:07.578-0:08:07.844	IT2	0.103292	8	0.386955
Trial 1	F1	P	F	0:08:07.844-0:08:08.110	IT2	0.219892	8	0.823772		Trial 1	F5	UP	F	0:08:07.844-0:08:08.110	IT2	0.114466	8	0.428819
Trial 1	F1	P	F	0:08:08.110-0:08:08.376	IT2	0.188057	8	0.704515		Trial 1	F5	UP	F	0:08:08.110-0:08:08.376	IT2	0.145983	8	0.546891
Trial 1	F1	P	F	0:08:08.376-0:08:08.642	IT2	0.114687	8	0.429651		Trial 1	F5	UP	F	0:08:08.376-0:08:08.642	IT2	0.087954	8	0.329498
Trial 1	F1	P	F	0:08:08.642-0:08:08.908	IT2	0.101728	8	0.381102		Trial 1	F5	UP	F	0:08:08.642-0:08:08.908	IT2	0.0556344	8	0.208419
Trial 1	F1	P	F	0:08:08.908-0:08:09.174	IT2	0.155534	8	0.582675		Trial 1	F5	UP	F	0:08:08.908-0:08:09.174	IT2	0.103505	8	0.387754
Trial 1	F1	P	F	0:08:09.174-0:08:09.440	IT2	0.114676	8	0.429606		Trial 1	F5	UP	F	0:08:09.174-0:08:09.440	IT2	0.317021	8	1.18764
Trial 1	F1	P	F	0:08:09.440-0:08:09.706	IT2	0.145898	8	0.546572		Trial 1	F5	UP	F	0:08:09.440-0:08:09.706	IT2	0.427213	8	1.60044
Trial 1	F1	P	F	0:08:09.706-0:08:09.972	IT2	0.103982	8	0.389543		Trial 1	F5	UP	F	0:08:09.706-0:08:09.972	IT2	0.21591	8	0.808852
Trial 1	F1	P	F	0:08:09.972-0:08:10.238	IT2	0.201995	8	0.756721		Trial 1	F5	UP	F	0:08:09.972-0:08:10.238	IT2	0.19394	8	0.726543
Trial 1	F1	P	F	0:08:10.238-0:08:10.504	IT2	0.193932	8	0.726517		Trial 1	F5	UP	F	0:08:10.238-0:08:10.504	IT2	0.234022	8	0.876705
Trial 1	F1	P	F	0:08:10.504-0:08:10.770	IT2	0.118009	8	0.442094		Trial 1	F5	UP	F	0:08:10.504-0:08:10.770	IT2	0.779188	8	2.91904
Trial 1	F1	P	F	0:08:10.770-0:08:11.036	IT2	0.106897	8	0.400463		Trial 1	F5	UP	F	0:08:10.770-0:08:11.036	IT2	0.438922	8	1.64432
Trial 1	F1	P	F	0:08:11.036-0:08:11.302	IT2	0.0775603	8	0.29056		Trial 1	F5	UP	F	0:08:11.036-0:08:11.302	IT2	0.386147	8	1.4466
Trial 1	F1	P	F	0:08:11.302-0:08:11.568	IT2	0.130195	8	0.48774		Trial 1	F5	UP	F	0:08:11.302-0:08:11.568	IT2	0.429454	8	1.60884
Trial 1	F1	P	F	0:08:11.568-0:08:11.834	IT2	0.0659156	8	0.246936		Trial 1	F5	UP	F	0:08:11.568-0:08:11.834	IT2	0.363783	8	1.36283
Trial 1	F1	P	F	0:08:11.834-0:08:12.100	IT2	0.137482	8	0.515043		Trial 1	F5	UP	F	0:08:11.834-0:08:12.100	IT2	1.24971	8	4.68171
Trial 1	F1	P	F	0:08:12.100-0:08:12.366	IT2	0.0734139	8	0.275026		Trial 1	F5	UP	F	0:08:12.100-0:08:12.366	IT2	0.654839	8	2.45318
Trial 1	F1	P	F	0:08:12.366-0:08:12.632	IT2	0.312769	8	1.17172		Trial 1	F5	UP	F	0:08:12.366-0:08:12.632	IT2	0.428572	8	1.60555
Trial 1	F1	P	F	0:08:12.632-0:08:12.898	IT2	0.0929792	8	0.348323		Trial 1	F5	UP	F	0:08:12.632-0:08:12.898	IT2	0.500587	8	1.87532
Trial 1	F1	P	F	0:08:12.898-0:08:13.164	IT2	0.184387	8	0.690757		Trial 1	F5	UP	F	0:08:12.898-0:08:13.164	IT2	0.422837	8	1.58405
Trial 1	F1	P	F	0:08:13.164-0:08:13.430	IT2	0.195681	8	0.733072		Trial 1	F5	UP	F	0:08:13.164-0:08:13.430	IT2	0.107184	8	0.401541
Trial 1	F1	P	F	0:08:13.430-0:08:13.696	IT2	0.192178	8	0.719944		Trial 1	F5	UP	F	0:08:13.430-0:08:13.696	IT2	0.0756317	8	0.283334
Trial 1	F1	P	F	0:08:13.696-0:08:13.962	IT2	0.184958	8	0.692901		Trial 1	F5	UP	F	0:08:13.696-0:08:13.962	IT2	0.064191	8	0.240476
Trial 1	F1	P	F	0:08:13.962-0:08:14.228	IT2	0.122673	8	0.459562		Trial 1	F5	UP	F	0:08:13.962-0:08:14.228	IT2	0.0151413	8	0.0567232
Trial 1	F1	P	F	0:08:14.228-0:08:14.494	IT2	0.187992	7	0.804873		Trial 1	F5	UP	F	0:08:14.228-0:08:14.494	IT2	0.0899691	7	0.385195
Trial 1	F1	P	F	0:08:14.494-0:08:14.760	IT2	0.166965	8	0.625491		Trial 1	F5	UP	F	0:08:14.494-0:08:14.760	IT2	0.0706041	8	0.264501
Trial 1	F1	P	F	0:08:14.760-0:08:15.026	IT2	0.175852	8	0.658787		Trial 1	F5	UP	F	0:08:14.760-0:08:15.026	IT2	0.0947396	8	0.354917
Trial 1	F1	P	F	0:08:15.026-0:08:15.292	IT2	0.122481	8	0.458842		Trial 1	F5	UP	F	0:08:15.026-0:08:15.292	IT2	0.0713968	8	0.267469
Trial 1	F1	P	F	0:08:15.292-0:08:15.558	IT2	0.157392	8	0.589631		Trial 1	F5	UP	F	0:08:15.292-0:08:15.558	IT2	0.0569788	8	0.213456
Trial 1	F1	P	F	0:08:15.558-0:08:15.824	IT2	0.189579	8	0.710209		Trial 1	F5	UP	F	0:08:15.558-0:08:15.824	IT2	0.0597639	8	0.22389
Trial 1	F1	P	F	0:08:15.824-0:08:16.090	IT2	0.273647	8	1.02515		Trial 1	F5	UP	F	0:08:15.824-0:08:16.090	IT2	0.0975014	8	0.365265
Trial 1	F1	P	F	0:08:16.090-0:08:16.356	IT2	0.194978	8	0.730434		Trial 1	F5	UP	F	0:08:16.090-0:08:16.356	IT2	0.0856162	8	0.320738
Trial 1	F1	P	F	0:08:16.356-0:08:16.622	IT2	0.194441	8	0.728422		Trial 1	F5	UP	F	0:08:16.356-0:08:16.622	IT2	0.0833548	8	0.312266
Trial 1	F1	P	F	0:08:16.622-0:08:16.888	IT2	0.259941	8	0.973808		Trial 1	F5	UP	F	0:08:16.622-0:08:16.888	IT2	0.0813045	8	0.304587
Trial 1	F1	P	F	0:08:16.888-0:08:17.154	IT2	0.127288	8	0.47685		Trial 1	F5	UP	F	0:08:16.888-0:08:17.154	IT2	0.0606149	8	0.227078
Trial 1	F1	P	F	0:08:17.154-0:08:17.420	IT2	0.229245	8	0.858807		Trial 1	F5	UP	F	0:08:17.154-0:08:17.420	IT2	0.0779255	8	0.291931
Trial 1	F1	P	F	0:08:17.420-0:08:17.686	IT2	0.0734876	8	0.275302		Trial 1	F5	UP	F	0:08:17.420-0:08:17.686	IT2	0.679391	8	2.54516
Trial 1	F1	P	F	0:08:17.686-0:08:17.952	IT2	0.140978	8	0.528134		Trial 1	F5	UP	F	0:08:17.686-0:08:17.952	IT2	0.368429	8	1.38022
Trial 1	F1	P	F	0:08:17.952-0:08:18.218	IT2	0.196654	8	0.73672		Trial 1	F5	UP	F	0:08:17.952-0:08:18.218	IT2	0.434341	8	1.62715
Trial 1	F1	P	F	0:08:18.218-0:08:18.484	IT2	0.0710012	8	0.265987		Trial 1	F5	UP	F	0:08:18.218-0:08:18.484	IT2	0.236644	8	0.886522
Trial 1	F1	P	F	0:08:18.484-0:08:18.750	IT2	0.128864	8	0.482754		Trial 1	F5	UP	F	0:08:18.484-0:08:18.750	IT2	0.237072	8	0.888134
Trial 1	F1	P	F	0:08:18.750-0:08:19.016	IT2	0.110681	8	0.414639		Trial 1	F5	UP	F	0:08:18.750-0:08:19.016	IT2	0.107982	8	0.404527
Trial 1	F1	P	F	0:08:19.016-0:08:19.282	IT2	0.0912904	8	0.341996		Trial 1	F5	UP	F	0:08:19.016-0:08:19.282	IT2	0.0899674	8	0.337041
Trial 1	F1	P	F	0:08:19.282-0:08:19.548	IT2	0.131111	8	0.491176		Trial 1	F5	UP	F	0:08:19.282-0:08:19.548	IT2	0.0283276	8	0.106122
Trial 1	F1	P	F	0:08:19.548-0:08:19.814	IT2	0.163638	8	0.613024		Trial 1	F5	UP	F	0:08:19.548-0:08:19.814	IT2	0.0749731	8	0.280867
Trial 1	F1	P	F	0:08:19.814-0:08:20.080	IT2	0.150697	8	0.56455		Trial 1	F5	UP	F	0:08:19.814-0:08:20.080	IT2	0.0325875	8	0.122081
Trial 1	F1	P	F	0:08:20.080-0:08:20.346	IT2	0.15811	8	0.592319		Trial 1	F5	UP	F	0:08:20.080-0:08:20.346	IT2	0.0275321	8	0.103143
Trial 1	F1	P	F	0:08:20.346-0:08:20.612	IT2	0.0897982	8	0.336406		Trial 1	F5	UP	F	0:08:20.346-0:08:20.612	IT2	0.0203027	8	0.0760587
Trial 1	F1	P	F	0:08:20.612-0:08:20.878	IT2	0.39207	8	1.46879		Trial 1	F5	UP	F	0:08:20.612-0:08:20.878	IT2	0.0326676	8	0.122381
Trial 1	F1	P	F	0:08:20.878-0:08:21.144	IT2	0.22007	8	0.824438		Trial 1	F5	UP	F	0:08:20.878-0:08:21.144	IT2	0.0628492	8	0.235449
Trial 1	F1	P	F	0:08:21.144-0:08:21.410	IT2	0.247647	8	0.927749		Trial 1	F5	UP	F	0:08:21.144-0:08:21.410	IT2	0.0299437	8	0.112177
Trial 1	F1	P	F	0:08:21.410-0:08:21.676	IT2	0.560844	8	2.10106		Trial 1	F5	UP	F	0:08:21.410-0:08:21.676	IT2	0.130724	8	0.489725
Trial 1	F1	P	F	0:08:21.676-0:08:21.942	IT2	0.365862	8	1.37061		Trial 1	F5	UP	F	0:08:21.676-0:08:21.942	IT2	0.417061	8	1.56241
Trial 1	F1	P	F	0:08:21.942-0:08:22.208	IT2	0.297974	8	1.11629		Trial 1	F5	UP	F	0:08:21.942-0:08:22.208	IT2	0.240264	8	0.900092
Trial 1	F1	P	F	0:08:22.208-0:08:22.474	IT2	0.16671	8	0.624536		Trial 1	F5	UP	F	0:08:22.208-0:08:22.474	IT2	0.226861	8	0.84988
Trial 1	F1	P	F	0:08:22.474-0:08:22.740	IT2	0.234828	8	0.879727		Trial 1	F5	UP	F	0:08:22.474-0:08:22.740	IT2	0.146388	8	0.548407
Trial 1	F1	P	F	0:08:22.740-0:08:23.006	IT2	0.0817051	8	0.306087		Trial 1	F5	UP	F	0:08:22.740-0:08:23.006	IT2	0.141141	8	0.528746
Trial 1	F1	P	F	0:08:23.006-0:08:23.272	IT2	0.138011	8	0.517027		Trial 1	F5	UP	F	0:08:23.006-0:08:23.272	IT2	0.0468044	8	0.17534
Trial 1	F1	P	F	0:08:23.272-0:08:23.538	IT2	0.166363	8	0.623241		Trial 1	F5	UP	F	0:08:23.272-0:08:23.538	IT2	0.0581481	8	0.217838
Trial 1	F1	P	F	0:08:23.538-0:08:23.804	IT2	0.0467499	8	0.175137		Trial 1	F5	UP	F	0:08:23.538-0:08:23.804	IT2	0.0575148	8	0.215465
Trial 1	F1	P	F	0:08:23.804-0:08:24.070	IT2	0.167632	7	0.717707		Trial 1	F5	UP	F	0:08:23.804-0:08:24.070	IT2	0.0207804	7	0.0889695
Trial 1	F1	P	F	0:08:24.070-0:08:24.336	IT2	0.120584	8	0.451738		Trial 1	F5	UP	F	0:08:24.070-0:08:24.336	IT2	0.138739	8	0.519753
Trial 1	F1	P	F	0:08:24.336-0:08:24.602	IT2	0.176029	8	0.659443		Trial 1	F5	UP	F	0:08:24.336-0:08:24.602	IT2	0.221651	8	0.830358
Trial 1	F1	P	F	0:08:24.602-0:08:24.868	IT2	0.101836	8	0.381504		Trial 1	F5	UP	F	0:08:24.602-0:08:24.868	IT2	0.161212	8	0.603941
Trial 1	F1	P	F	0:08:24.868-0:08:25.134	IT2	0.0547372	8	0.20506		Trial 1	F5	UP	F	0:08:24.868-0:08:25.134	IT2	0.470758	8	1.76358
Trial 1	F1	P	F	0:08:25.134-0:08:25.400	IT2	0.0937238	8	0.35111		Trial 1	F5	UP	F	0:08:25.134-0:08:25.400	IT2	0.351317	8	1.31612
Trial 1	F1	P	F	0:08:25.400-0:08:25.666	IT2	0.111612	8	0.418125		Trial 1	F5	UP	F	0:08:25.400-0:08:25.666	IT2	0.140832	8	0.527591
Trial 1	F1	P	F	0:08:25.666-0:08:25.932	IT2	0.127301	8	0.476899		Trial 1	F5	UP	F	0:08:25.666-0:08:25.932	IT2	0.361939	8	1.35591
Trial 1	F1	P	F	0:08:25.932-0:08:26.198	IT2	0.0867989	8	0.325169		Trial 1	F5	UP	F	0:08:25.932-0:08:26.198	IT2	0.391659	8	1.46725
Trial 1	F1	P	F	0:08:26.198-0:08:26.464	IT2	0.13363	8	0.50061		Trial 1	F5	UP	F	0:08:26.198-0:08:26.464	IT2	0.372446	8	1.39528
Trial 1	F1	P	F	0:08:26.464-0:08:26.730	IT2	0.0921208	8	0.345105		Trial 1	F5	UP	F	0:08:26.464-0:08:26.730	IT2	0.729014	8	2.73107
Trial 1	F1	P	F	0:08:26.730-0:08:26.996	IT2	0.122245	8	0.457965		Trial 1	F5	UP	F	0:08:26.730-0:08:26.996	IT2	0.291953	8	1.09373
Trial 1	F1	P	F	0:08:26.996-0:08:27.262	IT2	0.093804	8	0.351411		Trial 1	F5	UP	F	0:08:26.996-0:08:27.262	IT2	0.0535775	8	0.200715
Trial 1	F1	P	F	0:08:27.262-0:08:27.528	IT2	0.0752472	8	0.281893		Trial 1	F5	UP	F	0:08:27.262-0:08:27.528	IT2	0.0759487	8	0.284521
Trial 1	F1	P	F	0:08:27.528-0:08:27.794	IT2	0.0853798	8	0.319856		Trial 1	F5	UP	F	0:08:27.528-0:08:27.794	IT2	0.0476449	8	0.17849
Trial 1	F1	P	F	0:08:27.794-0:08:28.060	IT2	0.0444682	8	0.166588		Trial 1	F5	UP	F	0:08:27.794-0:08:28.060	IT2	0.0707771	8	0.265149
Trial 1	F1	P	F	0:08:28.060-0:08:28.326	IT2	0.0847216	8	0.317389		Trial 1	F5	UP	F	0:08:28.060-0:08:28.326	IT2	0.0860732	8	0.32245
Trial 1	F1	P	F	0:08:28.326-0:08:28.592	IT2	0.17228	8	0.645401		Trial 1	F5	UP	F	0:08:28.326-0:08:28.592	IT2	0.040318	8	0.151041
Trial 1	F1	P	F	0:08:28.592-0:08:28.858	IT2	0.105755	8	0.396181		Trial 1	F5	UP	F	0:08:28.592-0:08:28.858	IT2	0.0780344	8	0.292335
Trial 1	F1	P	F	0:08:28.858-0:08:29.124	IT2	0.0761669	8	0.285342		Trial 1	F5	UP	F	0:08:28.858-0:08:29.124	IT2	0.0262809	8	0.0984553
Trial 1	F1	P	F	0:08:29.124-0:08:29.390	IT2	0.102006	8	0.382143		Trial 1	F5	UP	F	0:08:29.124-0:08:29.390	IT2	0.0468644	8	0.175565
Trial 1	F1	P	F	0:08:29.390-0:08:29.656	IT2	0.0703125	8	0.263411		Trial 1	F5	UP	F	0:08:29.390-0:08:29.656	IT2	0.158315	8	0.593089
Trial 1	F1	P	F	0:08:29.656-0:08:29.922	IT2	0.183244	8	0.686473		Trial 1	F5	UP	F	0:08:29.656-0:08:29.922	IT2	0.322799	8	1.20928
Trial 1	F1	P	F	0:08:29.922-0:08:30.188	IT2	0.108934	8	0.408092		Trial 1	F5	UP	F	0:08:29.922-0:08:30.188	CS3a	1.14661	8	4.29547
Trial 1	F1	P	F	0:08:30.188-0:08:30.454	IT2	0.0898294	8	0.336524		Trial 1	F5	UP	F	0:08:30.188-0:08:30.454	CS3a	5.43137	8	20.3473
Trial 1	F1	P	F	0:08:30.454-0:08:30.720	IT2	0.148801	8	0.557443		Trial 1	F5	UP	F	0:08:30.454-0:08:30.720	CS3a	3.01503	8	11.2951
Trial 1	F1	P	F	0:08:30.720-0:08:30.986	IT2	0.0740636	8	0.27746		Trial 1	F5	UP	F	0:08:30.720-0:08:30.986	CS3a	0.365043	8	1.36754
Trial 1	F1	P	F	0:08:30.986-0:08:31.252	IT2	0.120917	8	0.452984		Trial 1	F5	UP	F	0:08:30.986-0:08:31.252	CS3a	0.579692	8	2.17166
Trial 1	F1	P	F	0:08:31.252-0:08:31.518	IT2	0.0477703	8	0.178958		Trial 1	F5	UP	F	0:08:31.252-0:08:31.518	CS3a	0.239055	8	0.895558
Trial 1	F1	P	F	0:08:31.518-0:08:31.784	IT2	0.113	8	0.423329		Trial 1	F5	UP	F	0:08:31.518-0:08:31.784	CS3a	0.238804	8	0.89462
Trial 1	F1	P	F	0:08:31.784-0:08:32.050	IT2	0.117311	8	0.439478		Trial 1	F5	UP	F	0:08:31.784-0:08:32.050	CS3a	0.12105	8	0.453482
Trial 1	F1	P	F	0:08:32.050-0:08:32.316	IT2	0.14541	8	0.544746		Trial 1	F5	UP	F	0:08:32.050-0:08:32.316	CS3a	0.158544	8	0.59395
Trial 1	F1	P	F	0:08:32.316-0:08:32.582	IT2	0.192211	8	0.720077		Trial 1	F5	UP	F	0:08:32.316-0:08:32.582	CS3a	0.154262	8	0.577902
Trial 1	F1	P	F	0:08:32.582-0:08:32.848	IT2	0.102093	8	0.382464		Trial 1	F5	UP	F	0:08:32.582-0:08:32.848	CS3a	0.167516	8	0.627558
Trial 1	F1	P	F	0:08:32.848-0:08:33.114	IT2	0.0999467	8	0.374426		Trial 1	F5	UP	F	0:08:32.848-0:08:33.114	CS3a	0.17604	8	0.65949
Trial 1	F1	P	F	0:08:33.114-0:08:33.380	IT2	0.126015	7	0.539529		Trial 1	F5	UP	F	0:08:33.114-0:08:33.380	CS3a	0.249094	7	1.06648
Trial 1	F1	P	F	0:08:33.380-0:08:33.646	IT2	0.164008	8	0.614416		Trial 1	F5	UP	F	0:08:33.380-0:08:33.646	CS3a	0.233771	8	0.875762
Trial 1	F1	P	F	0:08:33.646-0:08:33.912	IT2	0.0580505	8	0.217471		Trial 1	F5	UP	F	0:08:33.646-0:08:33.912	CS3a	0.24097	8	0.902735
Trial 1	F1	P	F	0:08:33.912-0:08:34.178	IT2	0.0796025	8	0.29821		Trial 1	F5	UP	F	0:08:33.912-0:08:34.178	CS3a	0.0891222	8	0.333873
Trial 1	F1	P	F	0:08:34.178-0:08:34.444	IT2	0.100187	8	0.375325		Trial 1	F5	UP	F	0:08:34.178-0:08:34.444	CS3a	0.139358	8	0.522071
Trial 1	F1	P	F	0:08:34.444-0:08:34.710	IT2	0.0665252	8	0.249221		Trial 1	F5	UP	F	0:08:34.444-0:08:34.710	CS3a	0.158542	8	0.593936
Trial 1	F1	P	F	0:08:34.710-0:08:34.976	IT2	0.122247	8	0.457966		Trial 1	F5	UP	F	0:08:34.710-0:08:34.976	CS3a	0.11157	8	0.417965
Trial 1	F1	P	F	0:08:34.976-0:08:35.242	IT2	0.0334184	8	0.125195		Trial 1	F5	UP	F	0:08:34.976-0:08:35.242	CS3a	0.0730573	8	0.273692
Trial 1	F1	P	F	0:08:35.242-0:08:35.508	IT2	0.0746388	8	0.279616		Trial 1	F5	UP	F	0:08:35.242-0:08:35.508	CS3a	0.356039	8	1.33381
Trial 1	F1	P	F	0:08:35.508-0:08:35.774	IT2	0.0800207	8	0.299778		Trial 1	F5	UP	F	0:08:35.508-0:08:35.774	CS3a	0.430783	8	1.61382
Trial 1	F1	P	F	0:08:35.774-0:08:36.040	IT2	0.134501	8	0.503871		Trial 1	F5	UP	F	0:08:35.774-0:08:36.040	CS3a	0.389435	8	1.45892
Trial 1	F1	P	F	0:08:36.040-0:08:36.306	IT2	0.103605	8	0.388131		Trial 1	F5	UP	F	0:08:36.040-0:08:36.306	CS3a	0.739357	8	2.76981
Trial 1	F1	P	F	0:08:36.306-0:08:36.572	IT2	0.159765	8	0.598521		Trial 1	F5	UP	F	0:08:36.306-0:08:36.572	CS3a	0.496899	8	1.86152
Trial 1	F1	P	F	0:08:36.572-0:08:36.838	IT2	0.220238	8	0.825065		Trial 1	F5	UP	F	0:08:36.572-0:08:36.838	CS3a	0.289719	8	1.08536
Trial 1	F1	P	F	0:08:36.838-0:08:37.104	IT2	0.25026	8	0.937541		Trial 1	F5	UP	F	0:08:36.838-0:08:37.104	CS3a	0.199175	8	0.746161
Trial 1	F1	P	F	0:08:37.104-0:08:37.370	IT2	0.205176	8	0.768636		Trial 1	F5	UP	F	0:08:37.104-0:08:37.370	CS3a	0.214031	8	0.801816
Trial 1	F1	P	F	0:08:37.370-0:08:37.636	IT2	0.177185	8	0.663778		Trial 1	F5	UP	F	0:08:37.370-0:08:37.636	CS3a	0.11045	8	0.413773
Trial 1	F1	P	F	0:08:37.636-0:08:37.902	IT2	0.278094	8	1.04181		Trial 1	F5	UP	F	0:08:37.636-0:08:37.902	CS3a	0.157932	8	0.59165
Trial 1	F1	P	F	0:08:37.902-0:08:38.168	IT2	0.341732	8	1.28021		Trial 1	F5	UP	F	0:08:37.902-0:08:38.168	CS3a	0.0835675	8	0.313063
Trial 1	F1	P	F	0:08:38.168-0:08:38.434	IT2	0.192814	8	0.72233		Trial 1	F5	UP	F	0:08:38.168-0:08:38.434	CS3a	0.100614	8	0.376928
Trial 1	F1	P	F	0:08:38.434-0:08:38.700	IT2	0.158951	8	0.595469		Trial 1	F5	UP	F	0:08:38.434-0:08:38.700	CS3a	0.210881	8	0.790012
Trial 1	F1	P	F	0:08:38.700-0:08:38.966	IT2	0.180752	8	0.67714		Trial 1	F5	UP	F	0:08:38.700-0:08:38.966	CS3a	0.274594	8	1.0287
Trial 1	F1	P	F	0:08:38.966-0:08:39.232	IT2	0.0884852	8	0.331487		Trial 1	F5	UP	F	0:08:38.966-0:08:39.232	CS3a	0.23639	8	0.885581
Trial 1	F1	P	F	0:08:39.232-0:08:39.498	IT2	0.110643	8	0.414497		Trial 1	F5	UP	F	0:08:39.232-0:08:39.498	CS3a	0.186735	8	0.699555
Trial 1	F1	P	F	0:08:39.498-0:08:39.764	IT2	0.122035	8	0.457172		Trial 1	F5	UP	F	0:08:39.498-0:08:39.764	CS3a	0.478194	8	1.79142
Trial 1	F1	P	F	0:08:39.764-0:08:40.030	IT2	0.0447247	8	0.167549		Trial 1	F5	UP	F	0:08:39.764-0:08:40.030	CS3a	0.124503	8	0.466421
Trial 1	F1	P	F	0:08:40.030-0:08:40.296	IT2	0.158685	8	0.594472		Trial 1	F5	UP	F	0:08:40.030-0:08:40.296	IT3	0.153013	8	0.573223
Trial 1	F1	P	F	0:08:40.296-0:08:40.562	IT2	0.131768	8	0.493636		Trial 1	F5	UP	F	0:08:40.296-0:08:40.562	IT3	0.122269	8	0.458052
Trial 1	F1	P	F	0:08:40.562-0:08:40.828	IT2	0.110905	8	0.415479		Trial 1	F5	UP	F	0:08:40.562-0:08:40.828	IT3	0.458513	8	1.71771
Trial 1	F1	P	F	0:08:40.828-0:08:41.094	IT2	0.119451	8	0.447495		Trial 1	F5	UP	F	0:08:40.828-0:08:41.094	IT3	0.103212	8	0.386658
Trial 1	F1	P	F	0:08:41.094-0:08:41.360	IT2	0.117075	8	0.438594		Trial 1	F5	UP	F	0:08:41.094-0:08:41.360	IT3	0.142182	8	0.532654
Trial 1	F1	P	F	0:08:41.360-0:08:41.626	IT2	0.0728248	8	0.272819		Trial 1	F5	UP	F	0:08:41.360-0:08:41.626	IT3	0.345177	8	1.29311
Trial 1	F1	P	F	0:08:41.626-0:08:41.892	IT2	0.0585313	8	0.219273		Trial 1	F5	UP	F	0:08:41.626-0:08:41.892	IT3	0.327413	8	1.22657
Trial 1	F1	P	F	0:08:41.892-0:08:42.158	IT2	0.100518	8	0.376564		Trial 1	F5	UP	F	0:08:41.892-0:08:42.158	IT3	0.241513	8	0.904769
Trial 1	F1	P	F	0:08:42.158-0:08:42.424	IT2	0.076724	8	0.287427		Trial 1	F5	UP	F	0:08:42.158-0:08:42.424	IT3	0.100863	8	0.377858
Trial 1	F1	P	F	0:08:42.424-0:08:42.690	IT2	0.152518	8	0.57137		Trial 1	F5	UP	F	0:08:42.424-0:08:42.690	IT3	0.111802	8	0.41884
Trial 1	F1	P	F	0:08:42.690-0:08:42.956	IT2	0.0545967	7	0.233752		Trial 1	F5	UP	F	0:08:42.690-0:08:42.956	IT3	0.0815294	7	0.349064
Trial 1	F1	P	F	0:08:42.956-0:08:43.222	IT2	0.140819	8	0.527542		Trial 1	F5	UP	F	0:08:42.956-0:08:43.222	IT3	0.0728425	8	0.272885
Trial 1	F1	P	F	0:08:43.222-0:08:43.488	IT2	0.240173	8	0.899757		Trial 1	F5	UP	F	0:08:43.222-0:08:43.488	IT3	0.366028	8	1.37123
Trial 1	F1	P	F	0:08:43.488-0:08:43.754	IT2	0.214717	8	0.804384		Trial 1	F5	UP	F	0:08:43.488-0:08:43.754	IT3	0.0881933	8	0.330393
Trial 1	F1	P	F	0:08:43.754-0:08:44.020	IT2	0.229529	8	0.859874		Trial 1	F5	UP	F	0:08:43.754-0:08:44.020	IT3	0.20672	8	0.774424
Trial 1	F1	P	F	0:08:44.020-0:08:44.286	IT2	0.203236	8	0.761372		Trial 1	F5	UP	F	0:08:44.020-0:08:44.286	IT3	0.165185	8	0.618821
Trial 1	F1	P	F	0:08:44.286-0:08:44.552	IT2	0.11456	8	0.429173		Trial 1	F5	UP	F	0:08:44.286-0:08:44.552	IT3	0.0753637	8	0.282332
Trial 1	F1	P	F	0:08:44.552-0:08:44.818	IT2	0.082653	8	0.309639		Trial 1	F5	UP	F	0:08:44.552-0:08:44.818	IT3	0.0819975	8	0.307185
Trial 1	F1	P	F	0:08:44.818-0:08:45.084	IT2	0.121978	8	0.456959		Trial 1	F5	UP	F	0:08:44.818-0:08:45.084	IT3	0.105493	8	0.395205
Trial 1	F1	P	F	0:08:45.084-0:08:45.350	IT2	0.058819	8	0.220352		Trial 1	F5	UP	F	0:08:45.084-0:08:45.350	IT3	0.139075	8	0.521015
Trial 1	F1	P	F	0:08:45.350-0:08:45.616	IT2	0.146513	8	0.548873		Trial 1	F5	UP	F	0:08:45.350-0:08:45.616	IT3	0.273607	8	1.02499
Trial 1	F1	P	F	0:08:45.616-0:08:45.882	IT2	0.0964703	8	0.361402		Trial 1	F5	UP	F	0:08:45.616-0:08:45.882	IT3	0.393352	8	1.47359
Trial 1	F1	P	F	0:08:45.882-0:08:46.148	IT2	0.0976273	8	0.365734		Trial 1	F5	UP	F	0:08:45.882-0:08:46.148	IT3	0.207271	8	0.776488
Trial 1	F1	P	F	0:08:46.148-0:08:46.414	IT2	0.122912	8	0.460456		Trial 1	F5	UP	F	0:08:46.148-0:08:46.414	IT3	0.525928	8	1.97025
Trial 1	F1	P	F	0:08:46.414-0:08:46.680	IT2	0.0559027	8	0.209427		Trial 1	F5	UP	F	0:08:46.414-0:08:46.680	IT3	0.607537	8	2.27598
Trial 1	F1	P	F	0:08:46.680-0:08:46.946	IT2	0.146643	8	0.54936		Trial 1	F5	UP	F	0:08:46.680-0:08:46.946	IT3	0.42821	8	1.60418
Trial 1	F1	P	F	0:08:46.946-0:08:47.212	IT2	0.0592358	8	0.221911		Trial 1	F5	UP	F	0:08:46.946-0:08:47.212	IT3	0.605296	8	2.26758
Trial 1	F1	P	F	0:08:47.212-0:08:47.478	IT2	0.16715	8	0.626188		Trial 1	F5	UP	F	0:08:47.212-0:08:47.478	IT3	0.610384	8	2.28665
Trial 1	F1	P	F	0:08:47.478-0:08:47.744	IT2	0.117379	8	0.439733		Trial 1	F5	UP	F	0:08:47.478-0:08:47.744	IT3	0.342107	8	1.28162
Trial 1	F1	P	F	0:08:47.744-0:08:48.010	IT2	0.149691	8	0.560783		Trial 1	F5	UP	F	0:08:47.744-0:08:48.010	IT3	0.250321	8	0.937765
Trial 1	F1	P	F	0:08:48.010-0:08:48.276	IT2	0.162238	8	0.607783		Trial 1	F5	UP	F	0:08:48.010-0:08:48.276	IT3	0.267431	8	1.00186
Trial 1	F1	P	F	0:08:48.276-0:08:48.542	IT2	0.104297	8	0.390721		Trial 1	F5	UP	F	0:08:48.276-0:08:48.542	IT3	0.25561	8	0.957577
Trial 1	F1	P	F	0:08:48.542-0:08:48.808	IT2	0.180364	8	0.675691		Trial 1	F5	UP	F	0:08:48.542-0:08:48.808	IT3	0.335291	8	1.25609
Trial 1	F1	P	F	0:08:48.808-0:08:49.074	IT2	0.106453	8	0.398798		Trial 1	F5	UP	F	0:08:48.808-0:08:49.074	IT3	0.489101	8	1.83229
Trial 1	F1	P	F	0:08:49.074-0:08:49.340	IT2	0.0989186	8	0.370572		Trial 1	F5	UP	F	0:08:49.074-0:08:49.340	IT3	0.953321	8	3.57137
Trial 1	F1	P	F	0:08:49.340-0:08:49.606	IT2	0.0920601	8	0.344879		Trial 1	F5	UP	F	0:08:49.340-0:08:49.606	IT3	0.191053	8	0.715732
Trial 1	F1	P	F	0:08:49.606-0:08:49.872	IT2	0.0787826	8	0.295138		Trial 1	F5	UP	F	0:08:49.606-0:08:49.872	IT3	0.234746	8	0.87942
Trial 1	F1	P	F	0:08:49.872-0:08:50.138	IT2	0.292079	8	1.0942		Trial 1	F5	UP	F	0:08:49.872-0:08:50.138	IT3	0.130003	8	0.487023
Trial 1	F1	P	F	0:08:50.138-0:08:50.404	IT2	0.3601	8	1.34902		Trial 1	F5	UP	F	0:08:50.138-0:08:50.404	IT3	0.49954	8	1.8714
[truncated: 97,150 more rows]

## Sheet: Day 2
Raw velocity data, extracted via ethovision, which is fed to R source code 1 to detect and extract darts, and to produce velocity traces
Showing Data from Acquisition Day 2 for all animals in Experiment 3
Used to calculate Darts/minute as seen in Figure 6
Used to produce velocity traces as seen in Figure 7
*must analyze Unpaired animals separately in R due to differences in CS timing
Trial	Animal	Group	Sex	TimeStamp	StimPeriod	Distance_cm	Samples	Velocity		Trial	Animal	Group	Sex	TimeStamp	StimPeriod	Distance_cm	Samples	Velocity
Trial 1	F1	P	F	Start-0:00:00.266	BL	0.481213	7	2.0603		Trial 1	F5	UP	F	Start-0:00:00.266	BL	0.25682	7	1.09956
Trial 1	F1	P	F	0:00:00.266-0:00:00.532	BL	0.407972	8	1.52836		Trial 1	F5	UP	F	0:00:00.266-0:00:00.532	BL	0.213498	8	0.799815
Trial 1	F1	P	F	0:00:00.532-0:00:00.798	BL	0.24712	8	0.925766		Trial 1	F5	UP	F	0:00:00.532-0:00:00.798	BL	0.198233	8	0.742628
Trial 1	F1	P	F	0:00:00.798-0:00:01.064	BL	0.120976	8	0.453206		Trial 1	F5	UP	F	0:00:00.798-0:00:01.064	BL	0.411697	8	1.54233
Trial 1	F1	P	F	0:00:01.064-0:00:01.330	BL	0.239495	8	0.897205		Trial 1	F5	UP	F	0:00:01.064-0:00:01.330	BL	0.381091	8	1.42766
Trial 1	F1	P	F	0:00:01.330-0:00:01.596	BL	0.145502	8	0.545087		Trial 1	F5	UP	F	0:00:01.330-0:00:01.596	BL	0.650676	8	2.43761
Trial 1	F1	P	F	0:00:01.596-0:00:01.862	BL	0.214714	8	0.804378		Trial 1	F5	UP	F	0:00:01.596-0:00:01.862	BL	0.295883	8	1.10845
Trial 1	F1	P	F	0:00:01.862-0:00:02.128	BL	0.0915119	8	0.342825		Trial 1	F5	UP	F	0:00:01.862-0:00:02.128	BL	0.085152	8	0.319
Trial 1	F1	P	F	0:00:02.128-0:00:02.394	BL	0.0613844	8	0.229963		Trial 1	F5	UP	F	0:00:02.128-0:00:02.394	BL	0.0389494	8	0.145915
Trial 1	F1	P	F	0:00:02.394-0:00:02.660	BL	0.163396	8	0.612124		Trial 1	F5	UP	F	0:00:02.394-0:00:02.660	BL	0.0168328	8	0.0630598
Trial 1	F1	P	F	0:00:02.660-0:00:02.926	BL	0.0852129	8	0.319228		Trial 1	F5	UP	F	0:00:02.660-0:00:02.926	BL	0.021091	8	0.0790123
Trial 1	F1	P	F	0:00:02.926-0:00:03.192	BL	0.182344	8	0.683104		Trial 1	F5	UP	F	0:00:02.926-0:00:03.192	BL	0.027924	8	0.104611
Trial 1	F1	P	F	0:00:03.192-0:00:03.458	BL	0.0352278	8	0.131972		Trial 1	F5	UP	F	0:00:03.192-0:00:03.458	BL	0.0126624	8	0.0474363
Trial 1	F1	P	F	0:00:03.458-0:00:03.724	BL	0.105022	8	0.393437		Trial 1	F5	UP	F	0:00:03.458-0:00:03.724	BL	0.0622469	8	0.233193
Trial 1	F1	P	F	0:00:03.724-0:00:03.990	BL	0.160227	8	0.600247		Trial 1	F5	UP	F	0:00:03.724-0:00:03.990	BL	0.0514761	8	0.192843
Trial 1	F1	P	F	0:00:03.990-0:00:04.256	BL	0.0874519	8	0.327618		Trial 1	F5	UP	F	0:00:03.990-0:00:04.256	BL	0.0210544	8	0.078875
Trial 1	F1	P	F	0:00:04.256-0:00:04.522	BL	0.166714	8	0.624549		Trial 1	F5	UP	F	0:00:04.256-0:00:04.522	BL	0.0182303	8	0.068295
Trial 1	F1	P	F	0:00:04.522-0:00:04.788	BL	0.0389528	8	0.145926		Trial 1	F5	UP	F	0:00:04.522-0:00:04.788	BL	0.0251336	8	0.0941571
Trial 1	F1	P	F	0:00:04.788-0:00:05.054	BL	0.165982	8	0.621812		Trial 1	F5	UP	F	0:00:04.788-0:00:05.054	BL	0.0196096	8	0.0734628
Trial 1	F1	P	F	0:00:05.054-0:00:05.320	BL	0.162864	8	0.610128		Trial 1	F5	UP	F	0:00:05.054-0:00:05.320	BL	0.0422293	8	0.158201
Trial 1	F1	P	F	0:00:05.320-0:00:05.586	BL	0.232708	8	0.871776		Trial 1	F5	UP	F	0:00:05.320-0:00:05.586	BL	0.115002	8	0.430829
Trial 1	F1	P	F	0:00:05.586-0:00:05.852	BL	0.086514	8	0.324102		Trial 1	F5	UP	F	0:00:05.586-0:00:05.852	BL	0.156183	8	0.585099
Trial 1	F1	P	F	0:00:05.852-0:00:06.118	BL	0.203251	8	0.761426		Trial 1	F5	UP	F	0:00:05.852-0:00:06.118	BL	0.26195	8	0.981325
Trial 1	F1	P	F	0:00:06.118-0:00:06.384	BL	0.125717	8	0.470973		Trial 1	F5	UP	F	0:00:06.118-0:00:06.384	BL	0.227805	8	0.853415
Trial 1	F1	P	F	0:00:06.384-0:00:06.650	BL	0.13086	8	0.490232		Trial 1	F5	UP	F	0:00:06.384-0:00:06.650	BL	0.281149	8	1.05325
Trial 1	F1	P	F	0:00:06.650-0:00:06.916	BL	0.0962313	8	0.360506		Trial 1	F5	UP	F	0:00:06.650-0:00:06.916	BL	0.668338	8	2.50377
Trial 1	F1	P	F	0:00:06.916-0:00:07.182	BL	0.0495437	8	0.185602		Trial 1	F5	UP	F	0:00:06.916-0:00:07.182	BL	0.198772	8	0.744647
Trial 1	F1	P	F	0:00:07.182-0:00:07.448	BL	0.104249	8	0.390539		Trial 1	F5	UP	F	0:00:07.182-0:00:07.448	BL	0.0501257	8	0.187783
Trial 1	F1	P	F	0:00:07.448-0:00:07.714	BL	0.108425	8	0.406186		Trial 1	F5	UP	F	0:00:07.448-0:00:07.714	BL	0.0829894	8	0.310899
Trial 1	F1	P	F	0:00:07.714-0:00:07.980	BL	0.190848	8	0.714971		Trial 1	F5	UP	F	0:00:07.714-0:00:07.980	BL	0.0845209	8	0.316636
Trial 1	F1	P	F	0:00:07.980-0:00:08.246	BL	0.120597	8	0.451788		Trial 1	F5	UP	F	0:00:07.980-0:00:08.246	BL	0.0838485	8	0.31412
Trial 1	F1	P	F	0:00:08.246-0:00:08.512	BL	0.305764	8	1.14547		Trial 1	F5	UP	F	0:00:08.246-0:00:08.512	BL	0.072681	8	0.272281
Trial 1	F1	P	F	0:00:08.512-0:00:08.778	BL	0.275469	8	1.03197		Trial 1	F5	UP	F	0:00:08.512-0:00:08.778	BL	0.0313996	8	0.11763
Trial 1	F1	P	F	0:00:08.778-0:00:09.044	BL	0.237998	8	0.891602		Trial 1	F5	UP	F	0:00:08.778-0:00:09.044	BL	0.0334812	8	0.125429
Trial 1	F1	P	F	0:00:09.044-0:00:09.310	BL	0.219142	8	0.820962		Trial 1	F5	UP	F	0:00:09.044-0:00:09.310	BL	0.0311857	8	0.116829
Trial 1	F1	P	F	0:00:09.310-0:00:09.576	BL	0.10558	7	0.452032		Trial 1	F5	UP	F	0:00:09.310-0:00:09.576	BL	0.0129272	7	0.0553471
Trial 1	F1	P	F	0:00:09.576-0:00:09.842	BL	0.154897	8	0.580284		Trial 1	F5	UP	F	0:00:09.576-0:00:09.842	BL	0.0708786	8	0.265528
Trial 1	F1	P	F	0:00:09.842-0:00:10.108	BL	0.0895965	8	0.335651		Trial 1	F5	UP	F	0:00:09.842-0:00:10.108	BL	0.0200351	8	0.0750564
Trial 1	F1	P	F	0:00:10.108-0:00:10.374	BL	0.108087	8	0.40492		Trial 1	F5	UP	F	0:00:10.108-0:00:10.374	BL	0.0256609	8	0.0961317
Trial 1	F1	P	F	0:00:10.374-0:00:10.640	BL	0.0622004	8	0.233018		Trial 1	F5	UP	F	0:00:10.374-0:00:10.640	BL	0.0132581	8	0.0496687
Trial 1	F1	P	F	0:00:10.640-0:00:10.906	BL	0.101414	8	0.379927		Trial 1	F5	UP	F	0:00:10.640-0:00:10.906	BL	0.0220045	8	0.0824342
Trial 1	F1	P	F	0:00:10.906-0:00:11.172	BL	0.0325441	8	0.121919		Trial 1	F5	UP	F	0:00:10.906-0:00:11.172	BL	0.019196	8	0.0719128
Trial 1	F1	P	F	0:00:11.172-0:00:11.438	BL	0.0813712	8	0.304835		Trial 1	F5	UP	F	0:00:11.172-0:00:11.438	BL	0.0107813	8	0.0403893
Trial 1	F1	P	F	0:00:11.438-0:00:11.704	BL	0.0962277	8	0.360493		Trial 1	F5	UP	F	0:00:11.438-0:00:11.704	BL	0.0151434	8	0.0567312
Trial 1	F1	P	F	0:00:11.704-0:00:11.970	BL	0.0889972	8	0.333407		Trial 1	F5	UP	F	0:00:11.704-0:00:11.970	BL	0.0189625	8	0.0710381
Trial 1	F1	P	F	0:00:11.970-0:00:12.236	BL	0.151964	8	0.569295		Trial 1	F5	UP	F	0:00:11.970-0:00:12.236	BL	0.0508374	8	0.190449
Trial 1	F1	P	F	0:00:12.236-0:00:12.502	BL	0.0666136	8	0.249551		Trial 1	F5	UP	F	0:00:12.236-0:00:12.502	BL	0.0897735	8	0.336313
Trial 1	F1	P	F	0:00:12.502-0:00:12.768	BL	0.173474	8	0.649873		Trial 1	F5	UP	F	0:00:12.502-0:00:12.768	BL	0.092561	8	0.346755
Trial 1	F1	P	F	0:00:12.768-0:00:13.034	BL	0.0622921	8	0.233362		Trial 1	F5	UP	F	0:00:12.768-0:00:13.034	BL	0.0189593	8	0.0710263
Trial 1	F1	P	F	0:00:13.034-0:00:13.300	BL	0.0653868	8	0.244954		Trial 1	F5	UP	F	0:00:13.034-0:00:13.300	BL	0.071774	8	0.268883
Trial 1	F1	P	F	0:00:13.300-0:00:13.566	BL	0.0692573	8	0.259454		Trial 1	F5	UP	F	0:00:13.300-0:00:13.566	BL	0.0343777	8	0.128787
Trial 1	F1	P	F	0:00:13.566-0:00:13.832	BL	0.0983641	8	0.368498		Trial 1	F5	UP	F	0:00:13.566-0:00:13.832	BL	0.0399699	8	0.149739
Trial 1	F1	P	F	0:00:13.832-0:00:14.098	BL	0.1492	8	0.558944		Trial 1	F5	UP	F	0:00:13.832-0:00:14.098	BL	0.0746061	8	0.279494
Trial 1	F1	P	F	0:00:14.098-0:00:14.364	BL	0.0690644	8	0.258733		Trial 1	F5	UP	F	0:00:14.098-0:00:14.364	BL	0.0537956	8	0.201531
Trial 1	F1	P	F	0:00:14.364-0:00:14.630	BL	0.199587	8	0.747701		Trial 1	F5	UP	F	0:00:14.364-0:00:14.630	BL	0.0678118	8	0.254039
Trial 1	F1	P	F	0:00:14.630-0:00:14.896	BL	0.0723664	8	0.271102		Trial 1	F5	UP	F	0:00:14.630-0:00:14.896	BL	0.036247	8	0.13579
Trial 1	F1	P	F	0:00:14.896-0:00:15.162	BL	0.0455812	8	0.170758		Trial 1	F5	UP	F	0:00:14.896-0:00:15.162	BL	0.0237728	8	0.089059
Trial 1	F1	P	F	0:00:15.162-0:00:15.428	BL	0.0809739	8	0.303348		Trial 1	F5	UP	F	0:00:15.162-0:00:15.428	BL	0.0183853	8	0.0688764
Trial 1	F1	P	F	0:00:15.428-0:00:15.694	BL	0.207326	8	0.77669		Trial 1	F5	UP	F	0:00:15.428-0:00:15.694	BL	0.0427376	8	0.160104
Trial 1	F1	P	F	0:00:15.694-0:00:15.960	BL	0.410674	8	1.5385		Trial 1	F5	UP	F	0:00:15.694-0:00:15.960	BL	0.0346663	8	0.129869
Trial 1	F1	P	F	0:00:15.960-0:00:16.226	BL	0.224919	8	0.842606		Trial 1	F5	UP	F	0:00:15.960-0:00:16.226	BL	0.0247372	8	0.0926717
Trial 1	F1	P	F	0:00:16.226-0:00:16.492	BL	0.174275	8	0.652876		Trial 1	F5	UP	F	0:00:16.226-0:00:16.492	BL	0.0390841	8	0.146418
Trial 1	F1	P	F	0:00:16.492-0:00:16.758	BL	0.223714	8	0.838085		Trial 1	F5	UP	F	0:00:16.492-0:00:16.758	BL	0.0202587	8	0.075894
Trial 1	F1	P	F	0:00:16.758-0:00:17.024	BL	0.0925457	8	0.3467		Trial 1	F5	UP	F	0:00:16.758-0:00:17.024	BL	0.0576064	8	0.215809
Trial 1	F1	P	F	0:00:17.024-0:00:17.290	BL	0.225469	8	0.844663		Trial 1	F5	UP	F	0:00:17.024-0:00:17.290	BL	0.0832864	8	0.312011
Trial 1	F1	P	F	0:00:17.290-0:00:17.556	BL	0.17151	8	0.642522		Trial 1	F5	UP	F	0:00:17.290-0:00:17.556	BL	0.0728051	8	0.272745
Trial 1	F1	P	F	0:00:17.556-0:00:17.822	BL	0.230935	8	0.865138		Trial 1	F5	UP	F	0:00:17.556-0:00:17.822	BL	0.0553923	8	0.207513
Trial 1	F1	P	F	0:00:17.822-0:00:18.088	BL	0.144889	8	0.54279		Trial 1	F5	UP	F	0:00:17.822-0:00:18.088	BL	0.0416933	8	0.156193
Trial 1	F1	P	F	0:00:18.088-0:00:18.354	BL	0.126252	8	0.472973		Trial 1	F5	UP	F	0:00:18.088-0:00:18.354	BL	0.0500846	8	0.187629
Trial 1	F1	P	F	0:00:18.354-0:00:18.620	BL	0.105635	8	0.395733		Trial 1	F5	UP	F	0:00:18.354-0:00:18.620	BL	0.0605961	8	0.227007
Trial 1	F1	P	F	0:00:18.620-0:00:18.886	BL	0.0976259	8	0.36573		Trial 1	F5	UP	F	0:00:18.620-0:00:18.886	BL	0.0299302	8	0.112126
Trial 1	F1	P	F	0:00:18.886-0:00:19.152	BL	0.144697	7	0.619513		Trial 1	F5	UP	F	0:00:18.886-0:00:19.152	BL	0.0539379	7	0.23093
Trial 1	F1	P	F	0:00:19.152-0:00:19.418	BL	0.159798	8	0.598642		Trial 1	F5	UP	F	0:00:19.152-0:00:19.418	BL	0.0452786	8	0.169625
Trial 1	F1	P	F	0:00:19.418-0:00:19.684	BL	0.0469736	8	0.175975		Trial 1	F5	UP	F	0:00:19.418-0:00:19.684	BL	0.0305292	8	0.11437
Trial 1	F1	P	F	0:00:19.684-0:00:19.950	BL	0.0759462	8	0.284515		Trial 1	F5	UP	F	0:00:19.684-0:00:19.950	BL	0.0597717	8	0.223921
Trial 1	F1	P	F	0:00:19.950-0:00:20.216	BL	0.0994238	8	0.372465		Trial 1	F5	UP	F	0:00:19.950-0:00:20.216	BL	0.0106781	8	0.0400025
Trial 1	F1	P	F	0:00:20.216-0:00:20.482	BL	0.109103	8	0.408724		Trial 1	F5	UP	F	0:00:20.216-0:00:20.482	BL	0.0365217	8	0.136819
Trial 1	F1	P	F	0:00:20.482-0:00:20.748	BL	0.112556	8	0.421666		Trial 1	F5	UP	F	0:00:20.482-0:00:20.748	BL	0.0478239	8	0.179162
Trial 1	F1	P	F	0:00:20.748-0:00:21.014	BL	0.0457909	8	0.171543		Trial 1	F5	UP	F	0:00:20.748-0:00:21.014	BL	0.0490877	8	0.183895
Trial 1	F1	P	F	0:00:21.014-0:00:21.280	BL	0.0979572	8	0.366971		Trial 1	F5	UP	F	0:00:21.014-0:00:21.280	BL	0.0645877	8	0.241964
Trial 1	F1	P	F	0:00:21.280-0:00:21.546	BL	0.0710995	8	0.266356		Trial 1	F5	UP	F	0:00:21.280-0:00:21.546	BL	0.545673	8	2.04422
Trial 1	F1	P	F	0:00:21.546-0:00:21.812	BL	0.042024	8	0.157433		Trial 1	F5	UP	F	0:00:21.546-0:00:21.812	BL	1.5702	8	5.88231
Trial 1	F1	P	F	0:00:21.812-0:00:22.078	BL	0.0584975	8	0.219146		Trial 1	F5	UP	F	0:00:21.812-0:00:22.078	BL	4.59056	8	17.1973
Trial 1	F1	P	F	0:00:22.078-0:00:22.344	BL	0.0627617	8	0.23512		Trial 1	F5	UP	F	0:00:22.078-0:00:22.344	BL	2.96398	8	11.1037
Trial 1	F1	P	F	0:00:22.344-0:00:22.610	BL	0.0958363	8	0.359028		Trial 1	F5	UP	F	0:00:22.344-0:00:22.610	BL	2.54716	8	9.54226
Trial 1	F1	P	F	0:00:22.610-0:00:22.876	BL	0.079342	8	0.297236		Trial 1	F5	UP	F	0:00:22.610-0:00:22.876	BL	2.28243	8	8.55054
Trial 1	F1	P	F	0:00:22.876-0:00:23.142	BL	0.101878	8	0.381661		Trial 1	F5	UP	F	0:00:22.876-0:00:23.142	BL	2.21982	8	8.31597
Trial 1	F1	P	F	0:00:23.142-0:00:23.408	BL	0.0624255	8	0.233862		Trial 1	F5	UP	F	0:00:23.142-0:00:23.408	BL	2.29381	8	8.59318
Trial 1	F1	P	F	0:00:23.408-0:00:23.674	BL	0.11221	8	0.420369		Trial 1	F5	UP	F	0:00:23.408-0:00:23.674	BL	1.51644	8	5.68094
Trial 1	F1	P	F	0:00:23.674-0:00:23.940	BL	0.0800485	8	0.299881		Trial 1	F5	UP	F	0:00:23.674-0:00:23.940	BL	1.48689	8	5.57028
Trial 1	F1	P	F	0:00:23.940-0:00:24.206	BL	0.15647	8	0.586175		Trial 1	F5	UP	F	0:00:23.940-0:00:24.206	BL	2.3175	8	8.68191
Trial 1	F1	P	F	0:00:24.206-0:00:24.472	BL	0.0849087	8	0.318088		Trial 1	F5	UP	F	0:00:24.206-0:00:24.472	BL	1.11501	8	4.1771
Trial 1	F1	P	F	0:00:24.472-0:00:24.738	BL	0.0709445	8	0.265775		Trial 1	F5	UP	F	0:00:24.472-0:00:24.738	BL	1.6888	8	6.32666
Trial 1	F1	P	F	0:00:24.738-0:00:25.004	BL	0.0920118	8	0.344699		Trial 1	F5	UP	F	0:00:24.738-0:00:25.004	BL	11.6764	8	43.7429
Trial 1	F1	P	F	0:00:25.004-0:00:25.270	BL	0.215667	8	0.807947		Trial 1	F5	UP	F	0:00:25.004-0:00:25.270	BL	3.37332	8	12.6373
Trial 1	F1	P	F	0:00:25.270-0:00:25.536	BL	0.0905234	8	0.339124		Trial 1	F5	UP	F	0:00:25.270-0:00:25.536	BL	3.08195	8	11.5458
Trial 1	F1	P	F	0:00:25.536-0:00:25.802	BL	0.0657641	8	0.246368		Trial 1	F5	UP	F	0:00:25.536-0:00:25.802	BL	1.58291	8	5.92997
Trial 1	F1	P	F	0:00:25.802-0:00:26.068	BL	0.13949	8	0.522564		Trial 1	F5	UP	F	0:00:25.802-0:00:26.068	BL	2.61315	8	9.78954
Trial 1	F1	P	F	0:00:26.068-0:00:26.334	BL	0.0856841	8	0.320993		Trial 1	F5	UP	F	0:00:26.068-0:00:26.334	BL	2.25196	8	8.43636
Trial 1	F1	P	F	0:00:26.334-0:00:26.600	BL	0.226977	8	0.85031		Trial 1	F5	UP	F	0:00:26.334-0:00:26.600	BL	3.19071	8	11.9532
Trial 1	F1	P	F	0:00:26.600-0:00:26.866	BL	0.191665	8	0.718025		Trial 1	F5	UP	F	0:00:26.600-0:00:26.866	BL	4.26814	8	15.9895
Trial 1	F1	P	F	0:00:26.866-0:00:27.132	BL	0.191488	8	0.717362		Trial 1	F5	UP	F	0:00:26.866-0:00:27.132	BL	4.71619	8	17.668
Trial 1	F1	P	F	0:00:27.132-0:00:27.398	BL	0.166095	8	0.622233		Trial 1	F5	UP	F	0:00:27.132-0:00:27.398	BL	2.77263	8	10.387
Trial 1	F1	P	F	0:00:27.398-0:00:27.664	BL	0.117639	8	0.440704		Trial 1	F5	UP	F	0:00:27.398-0:00:27.664	BL	2.02476	8	7.58525
Trial 1	F1	P	F	0:00:27.664-0:00:27.930	BL	0.0790427	8	0.296114		Trial 1	F5	UP	F	0:00:27.664-0:00:27.930	BL	0.734926	8	2.75322
Trial 1	F1	P	F	0:00:27.930-0:00:28.196	BL	0.075636	8	0.283352		Trial 1	F5	UP	F	0:00:27.930-0:00:28.196	BL	0.327071	8	1.22529
Trial 1	F1	P	F	0:00:28.196-0:00:28.462	BL	0.256586	8	0.961231		Trial 1	F5	UP	F	0:00:28.196-0:00:28.462	BL	0.403378	8	1.51115
Trial 1	F1	P	F	0:00:28.462-0:00:28.728	BL	0.103967	7	0.44513		Trial 1	F5	UP	F	0:00:28.462-0:00:28.728	BL	0.932882	7	3.99408
Trial 1	F1	P	F	0:00:28.728-0:00:28.994	BL	0.267109	8	1.00066		Trial 1	F5	UP	F	0:00:28.728-0:00:28.994	BL	0.894059	8	3.34937
Trial 1	F1	P	F	0:00:28.994-0:00:29.260	BL	0.0773222	8	0.289668		Trial 1	F5	UP	F	0:00:28.994-0:00:29.260	BL	1.87971	8	7.04185
Trial 1	F1	P	F	0:00:29.260-0:00:29.526	BL	0.127152	8	0.476342		Trial 1	F5	UP	F	0:00:29.260-0:00:29.526	BL	1.97952	8	7.41575
Trial 1	F1	P	F	0:00:29.526-0:00:29.792	BL	0.139619	8	0.52305		Trial 1	F5	UP	F	0:00:29.526-0:00:29.792	BL	1.04308	8	3.90763
Trial 1	F1	P	F	0:00:29.792-0:00:30.058	BL	0.0794302	8	0.297563		Trial 1	F5	UP	F	0:00:29.792-0:00:30.058	BL	2.07918	8	7.7891
Trial 1	F1	P	F	0:00:30.058-0:00:30.324	BL	0.0846951	8	0.317291		Trial 1	F5	UP	F	0:00:30.058-0:00:30.324	BL	1.41267	8	5.29223
Trial 1	F1	P	F	0:00:30.324-0:00:30.590	BL	0.0240257	8	0.0900064		Trial 1	F5	UP	F	0:00:30.324-0:00:30.590	BL	1.8608	8	6.97103
Trial 1	F1	P	F	0:00:30.590-0:00:30.856	BL	0.115581	8	0.432994		Trial 1	F5	UP	F	0:00:30.590-0:00:30.856	BL	0.665174	8	2.49191
Trial 1	F1	P	F	0:00:30.856-0:00:31.122	BL	0.0570941	8	0.213889		Trial 1	F5	UP	F	0:00:30.856-0:00:31.122	BL	0.367875	8	1.37815
Trial 1	F1	P	F	0:00:31.122-0:00:31.388	BL	0.25917	8	0.97091		Trial 1	F5	UP	F	0:00:31.122-0:00:31.388	BL	0.442501	8	1.65771
Trial 1	F1	P	F	0:00:31.388-0:00:31.654	BL	0.0759671	8	0.284593		Trial 1	F5	UP	F	0:00:31.388-0:00:31.654	BL	0.513474	8	1.92359
Trial 1	F1	P	F	0:00:31.654-0:00:31.920	BL	0.105836	8	0.396489		Trial 1	F5	UP	F	0:00:31.654-0:00:31.920	BL	0.368513	8	1.38054
Trial 1	F1	P	F	0:00:31.920-0:00:32.186	BL	0.141967	8	0.531848		Trial 1	F5	UP	F	0:00:31.920-0:00:32.186	BL	0.748071	8	2.80245
Trial 1	F1	P	F	0:00:32.186-0:00:32.452	BL	0.0974916	8	0.365226		Trial 1	F5	UP	F	0:00:32.186-0:00:32.452	BL	0.419974	8	1.57333
Trial 1	F1	P	F	0:00:32.452-0:00:32.718	BL	0.080266	8	0.300696		Trial 1	F5	UP	F	0:00:32.452-0:00:32.718	BL	0.786067	8	2.9448
Trial 1	F1	P	F	0:00:32.718-0:00:32.984	BL	0.0619043	8	0.23191		Trial 1	F5	UP	F	0:00:32.718-0:00:32.984	BL	0.690377	8	2.58632
Trial 1	F1	P	F	0:00:32.984-0:00:33.250	BL	0.0606114	8	0.227064		Trial 1	F5	UP	F	0:00:32.984-0:00:33.250	BL	1.57485	8	5.89977
Trial 1	F1	P	F	0:00:33.250-0:00:33.516	BL	0.237637	8	0.890256		Trial 1	F5	UP	F	0:00:33.250-0:00:33.516	BL	0.751666	8	2.81593
Trial 1	F1	P	F	0:00:33.516-0:00:33.782	BL	0.228282	8	0.855203		Trial 1	F5	UP	F	0:00:33.516-0:00:33.782	BL	0.572433	8	2.14447
Trial 1	F1	P	F	0:00:33.782-0:00:34.048	BL	0.122263	8	0.458028		Trial 1	F5	UP	F	0:00:33.782-0:00:34.048	BL	0.255956	8	0.958869
Trial 1	F1	P	F	0:00:34.048-0:00:34.314	BL	0.106283	8	0.398165		Trial 1	F5	UP	F	0:00:34.048-0:00:34.314	BL	0.521492	8	1.95364
Trial 1	F1	P	F	0:00:34.314-0:00:34.580	BL	0.103651	8	0.388303		Trial 1	F5	UP	F	0:00:34.314-0:00:34.580	BL	0.377346	8	1.41363
Trial 1	F1	P	F	0:00:34.580-0:00:34.846	BL	0.206853	8	0.774928		Trial 1	F5	UP	F	0:00:34.580-0:00:34.846	BL	0.611283	8	2.29002
Trial 1	F1	P	F	0:00:34.846-0:00:35.112	BL	0.186719	8	0.699498		Trial 1	F5	UP	F	0:00:34.846-0:00:35.112	BL	1.12746	8	4.22377
Trial 1	F1	P	F	0:00:35.112-0:00:35.378	BL	0.14499	8	0.543171		Trial 1	F5	UP	F	0:00:35.112-0:00:35.378	BL	1.74641	8	6.54245
Trial 1	F1	P	F	0:00:35.378-0:00:35.644	BL	0.102146	8	0.382663		Trial 1	F5	UP	F	0:00:35.378-0:00:35.644	BL	0.921023	8	3.4504
Trial 1	F1	P	F	0:00:35.644-0:00:35.910	BL	0.101175	8	0.379024		Trial 1	F5	UP	F	0:00:35.644-0:00:35.910	BL	1.76555	8	6.61417
Trial 1	F1	P	F	0:00:35.910-0:00:36.176	BL	0.0697037	8	0.261127		Trial 1	F5	UP	F	0:00:35.910-0:00:36.176	BL	1.99477	8	7.47291
Trial 1	F1	P	F	0:00:36.176-0:00:36.442	BL	0.0770657	8	0.28871		Trial 1	F5	UP	F	0:00:36.176-0:00:36.442	BL	2.55924	8	9.58754
Trial 1	F1	P	F	0:00:36.442-0:00:36.708	BL	0.0893398	8	0.334688		Trial 1	F5	UP	F	0:00:36.442-0:00:36.708	BL	1.08619	8	4.06914
Trial 1	F1	P	F	0:00:36.708-0:00:36.974	BL	0.0703212	8	0.263441		Trial 1	F5	UP	F	0:00:36.708-0:00:36.974	BL	1.66188	8	6.22584
Trial 1	F1	P	F	0:00:36.974-0:00:37.240	BL	0.110903	8	0.415471		Trial 1	F5	UP	F	0:00:36.974-0:00:37.240	BL	0.730718	8	2.73744
Trial 1	F1	P	F	0:00:37.240-0:00:37.506	BL	0.114808	8	0.4301		Trial 1	F5	UP	F	0:00:37.240-0:00:37.506	BL	2.19642	8	8.22833
Trial 1	F1	P	F	0:00:37.506-0:00:37.772	BL	0.0781101	8	0.292622		Trial 1	F5	UP	F	0:00:37.506-0:00:37.772	BL	0.78682	8	2.94761
Trial 1	F1	P	F	0:00:37.772-0:00:38.038	BL	0.120044	7	0.513963		Trial 1	F5	UP	F	0:00:37.772-0:00:38.038	BL	0.303848	7	1.3009
Trial 1	F1	P	F	0:00:38.038-0:00:38.304	BL	0.0718614	8	0.269212		Trial 1	F5	UP	F	0:00:38.038-0:00:38.304	BL	0.817062	8	3.06092
Trial 1	F1	P	F	0:00:38.304-0:00:38.570	BL	0.124286	8	0.465606		Trial 1	F5	UP	F	0:00:38.304-0:00:38.570	BL	1.04338	8	3.90874
Trial 1	F1	P	F	0:00:38.570-0:00:38.836	BL	0.157362	8	0.589516		Trial 1	F5	UP	F	0:00:38.570-0:00:38.836	BL	0.449399	8	1.68356
Trial 1	F1	P	F	0:00:38.836-0:00:39.102	BL	0.140801	8	0.527478		Trial 1	F5	UP	F	0:00:38.836-0:00:39.102	BL	1.12127	8	4.20057
Trial 1	F1	P	F	0:00:39.102-0:00:39.368	BL	0.107863	8	0.404081		Trial 1	F5	UP	F	0:00:39.102-0:00:39.368	BL	1.28647	8	4.81943
Trial 1	F1	P	F	0:00:39.368-0:00:39.634	BL	0.0374873	8	0.140437		Trial 1	F5	UP	F	0:00:39.368-0:00:39.634	BL	2.49652	8	9.35261
Trial 1	F1	P	F	0:00:39.634-0:00:39.900	BL	0.191641	8	0.717931		Trial 1	F5	UP	F	0:00:39.634-0:00:39.900	BL	1.45342	8	5.44485
Trial 1	F1	P	F	0:00:39.900-0:00:40.166	BL	0.0691479	8	0.259046		Trial 1	F5	UP	F	0:00:39.900-0:00:40.166	BL	2.17985	8	8.16623
Trial 1	F1	P	F	0:00:40.166-0:00:40.432	BL	0.206056	8	0.771935		Trial 1	F5	UP	F	0:00:40.166-0:00:40.432	BL	0.843775	8	3.16099
Trial 1	F1	P	F	0:00:40.432-0:00:40.698	BL	0.071925	8	0.269449		Trial 1	F5	UP	F	0:00:40.432-0:00:40.698	BL	0.441644	8	1.65451
Trial 1	F1	P	F	0:00:40.698-0:00:40.964	BL	0.104628	8	0.391964		Trial 1	F5	UP	F	0:00:40.698-0:00:40.964	BL	0.905176	8	3.39102
Trial 1	F1	P	F	0:00:40.964-0:00:41.230	BL	0.0795533	8	0.298026		Trial 1	F5	UP	F	0:00:40.964-0:00:41.230	BL	0.731287	8	2.73958
Trial 1	F1	P	F	0:00:41.230-0:00:41.496	BL	0.143726	8	0.53843		Trial 1	F5	UP	F	0:00:41.230-0:00:41.496	BL	0.282842	8	1.0596
Trial 1	F1	P	F	0:00:41.496-0:00:41.762	BL	0.113751	8	0.42614		Trial 1	F5	UP	F	0:00:41.496-0:00:41.762	BL	0.0543296	8	0.203532
Trial 1	F1	P	F	0:00:41.762-0:00:42.028	BL	0.113691	8	0.425912		Trial 1	F5	UP	F	0:00:41.762-0:00:42.028	BL	0.681051	8	2.55138
Trial 1	F1	P	F	0:00:42.028-0:00:42.294	BL	0.123565	8	0.462903		Trial 1	F5	UP	F	0:00:42.028-0:00:42.294	BL	0.569961	8	2.13522
Trial 1	F1	P	F	0:00:42.294-0:00:42.560	BL	0.0395609	8	0.148205		Trial 1	F5	UP	F	0:00:42.294-0:00:42.560	BL	0.444595	8	1.66556
Trial 1	F1	P	F	0:00:42.560-0:00:42.826	BL	0.15621	8	0.5852		Trial 1	F5	UP	F	0:00:42.560-0:00:42.826	BL	0.235956	8	0.883946
Trial 1	F1	P	F	0:00:42.826-0:00:43.092	BL	0.174614	8	0.654147		Trial 1	F5	UP	F	0:00:42.826-0:00:43.092	BL	0.235916	8	0.883799
Trial 1	F1	P	F	0:00:43.092-0:00:43.358	BL	0.227486	8	0.852212		Trial 1	F5	UP	F	0:00:43.092-0:00:43.358	BL	0.238328	8	0.89283
Trial 1	F1	P	F	0:00:43.358-0:00:43.624	BL	0.186299	8	0.697924		Trial 1	F5	UP	F	0:00:43.358-0:00:43.624	BL	0.207082	8	0.77578
Trial 1	F1	P	F	0:00:43.624-0:00:43.890	BL	0.180754	8	0.677152		Trial 1	F5	UP	F	0:00:43.624-0:00:43.890	BL	0.119287	8	0.446875
Trial 1	F1	P	F	0:00:43.890-0:00:44.156	BL	0.209196	8	0.783697		Trial 1	F5	UP	F	0:00:43.890-0:00:44.156	BL	0.393013	8	1.47233
Trial 1	F1	P	F	0:00:44.156-0:00:44.422	BL	0.10025	8	0.375559		Trial 1	F5	UP	F	0:00:44.156-0:00:44.422	BL	0.186894	8	0.700155
Trial 1	F1	P	F	0:00:44.422-0:00:44.688	BL	0.165835	8	0.621261		Trial 1	F5	UP	F	0:00:44.422-0:00:44.688	BL	0.648923	8	2.43102
Trial 1	F1	P	F	0:00:44.688-0:00:44.954	BL	0.14297	8	0.535607		Trial 1	F5	UP	F	0:00:44.688-0:00:44.954	BL	0.369643	8	1.38478
Trial 1	F1	P	F	0:00:44.954-0:00:45.220	BL	0.193007	8	0.723049		Trial 1	F5	UP	F	0:00:44.954-0:00:45.220	BL	0.959463	8	3.59439
Trial 1	F1	P	F	0:00:45.220-0:00:45.486	BL	0.1527	8	0.572048		Trial 1	F5	UP	F	0:00:45.220-0:00:45.486	BL	1.70882	8	6.40167
Trial 1	F1	P	F	0:00:45.486-0:00:45.752	BL	0.364725	8	1.36634		Trial 1	F5	UP	F	0:00:45.486-0:00:45.752	BL	2.00764	8	7.52114
Trial 1	F1	P	F	0:00:45.752-0:00:46.018	BL	0.0902788	8	0.338209		Trial 1	F5	UP	F	0:00:45.752-0:00:46.018	BL	2.44067	8	9.14334
Trial 1	F1	P	F	0:00:46.018-0:00:46.284	BL	0.0481515	8	0.180389		Trial 1	F5	UP	F	0:00:46.018-0:00:46.284	BL	1.68862	8	6.32601
Trial 1	F1	P	F	0:00:46.284-0:00:46.550	BL	0.0783223	8	0.293413		Trial 1	F5	UP	F	0:00:46.284-0:00:46.550	BL	0.807424	8	3.02481
Trial 1	F1	P	F	0:00:46.550-0:00:46.816	BL	0.142976	8	0.535626		Trial 1	F5	UP	F	0:00:46.550-0:00:46.816	BL	1.89312	8	7.09211
Trial 1	F1	P	F	0:00:46.816-0:00:47.082	BL	0.260565	8	0.97614		Trial 1	F5	UP	F	0:00:46.816-0:00:47.082	BL	1.9681	8	7.37299
Trial 1	F1	P	F	0:00:47.082-0:00:47.348	BL	0.0592634	8	0.222015		Trial 1	F5	UP	F	0:00:47.082-0:00:47.348	BL	2.11799	8	7.93449
Trial 1	F1	P	F	0:00:47.348-0:00:47.614	BL	0.328079	7	1.40464		Trial 1	F5	UP	F	0:00:47.348-0:00:47.614	BL	0.92937	7	3.97902
Trial 1	F1	P	F	0:00:47.614-0:00:47.880	BL	0.115465	8	0.432562		Trial 1	F5	UP	F	0:00:47.614-0:00:47.880	BL	1.23027	8	4.60893
Trial 1	F1	P	F	0:00:47.880-0:00:48.146	BL	0.151286	8	0.566753		Trial 1	F5	UP	F	0:00:47.880-0:00:48.146	BL	1.69838	8	6.36256
Trial 1	F1	P	F	0:00:48.146-0:00:48.412	BL	0.0933068	8	0.349552		Trial 1	F5	UP	F	0:00:48.146-0:00:48.412	BL	3.33209	8	12.4828
Trial 1	F1	P	F	0:00:48.412-0:00:48.678	BL	0.147639	8	0.553092		Trial 1	F5	UP	F	0:00:48.412-0:00:48.678	BL	0.907126	8	3.39831
Trial 1	F1	P	F	0:00:48.678-0:00:48.944	BL	0.0845662	8	0.316807		Trial 1	F5	UP	F	0:00:48.678-0:00:48.944	BL	1.13298	8	4.24442
Trial 1	F1	P	F	0:00:48.944-0:00:49.210	BL	0.0629626	8	0.235875		Trial 1	F5	UP	F	0:00:48.944-0:00:49.210	BL	0.455683	8	1.70711
Trial 1	F1	P	F	0:00:49.210-0:00:49.476	BL	0.176916	8	0.66277		Trial 1	F5	UP	F	0:00:49.210-0:00:49.476	BL	0.30999	8	1.1613
Trial 1	F1	P	F	0:00:49.476-0:00:49.742	BL	0.157391	8	0.589626		Trial 1	F5	UP	F	0:00:49.476-0:00:49.742	BL	1.23269	8	4.61797
Trial 1	F1	P	F	0:00:49.742-0:00:50.008	BL	0.134573	8	0.504147		Trial 1	F5	UP	F	0:00:49.742-0:00:50.008	BL	1.35822	8	5.08822
Trial 1	F1	P	F	0:00:50.008-0:00:50.274	BL	0.140972	8	0.528118		Trial 1	F5	UP	F	0:00:50.008-0:00:50.274	BL	2.50309	8	9.37718
Trial 1	F1	P	F	0:00:50.274-0:00:50.540	BL	0.085456	8	0.32014		Trial 1	F5	UP	F	0:00:50.274-0:00:50.540	BL	1.42239	8	5.32865
Trial 1	F1	P	F	0:00:50.540-0:00:50.806	BL	0.0381089	8	0.142765		Trial 1	F5	UP	F	0:00:50.540-0:00:50.806	BL	2.74367	8	10.2785
Trial 1	F1	P	F	0:00:50.806-0:00:51.072	BL	0.234825	8	0.879706		Trial 1	F5	UP	F	0:00:50.806-0:00:51.072	BL	1.51425	8	5.67275
Trial 1	F1	P	F	0:00:51.072-0:00:51.338	BL	0.195638	8	0.732908		Trial 1	F5	UP	F	0:00:51.072-0:00:51.338	BL	1.51313	8	5.6686
Trial 1	F1	P	F	0:00:51.338-0:00:51.604	BL	0.198508	8	0.743663		Trial 1	F5	UP	F	0:00:51.338-0:00:51.604	BL	0.338093	8	1.26658
Trial 1	F1	P	F	0:00:51.604-0:00:51.870	BL	0.153681	8	0.575732		Trial 1	F5	UP	F	0:00:51.604-0:00:51.870	BL	0.207397	8	0.776966
Trial 1	F1	P	F	0:00:51.870-0:00:52.136	BL	0.132292	8	0.495596		Trial 1	F5	UP	F	0:00:51.870-0:00:52.136	BL	0.074703	8	0.279856
Trial 1	F1	P	F	0:00:52.136-0:00:52.402	BL	0.220068	8	0.824424		Trial 1	F5	UP	F	0:00:52.136-0:00:52.402	BL	0.126308	8	0.473181
Trial 1	F1	P	F	0:00:52.402-0:00:52.668	BL	0.147844	8	0.553865		Trial 1	F5	UP	F	0:00:52.402-0:00:52.668	BL	0.0283677	8	0.106273
Trial 1	F1	P	F	0:00:52.668-0:00:52.934	BL	0.153393	8	0.57465		Trial 1	F5	UP	F	0:00:52.668-0:00:52.934	BL	0.0965758	8	0.361796
Trial 1	F1	P	F	0:00:52.934-0:00:53.200	BL	0.07481	8	0.280259		Trial 1	F5	UP	F	0:00:52.934-0:00:53.200	BL	0.0625668	8	0.234391
Trial 1	F1	P	F	0:00:53.200-0:00:53.466	BL	0.138152	8	0.517553		Trial 1	F5	UP	F	0:00:53.200-0:00:53.466	BL	0.0500757	8	0.187596
Trial 1	F1	P	F	0:00:53.466-0:00:53.732	BL	0.138425	8	0.518576		Trial 1	F5	UP	F	0:00:53.466-0:00:53.732	BL	0.111434	8	0.417458
Trial 1	F1	P	F	0:00:53.732-0:00:53.998	BL	0.104277	8	0.390651		Trial 1	F5	UP	F	0:00:53.732-0:00:53.998	BL	0.0597235	8	0.22374
Trial 1	F1	P	F	0:00:53.998-0:00:54.264	BL	0.113245	8	0.424242		Trial 1	F5	UP	F	0:00:53.998-0:00:54.264	BL	0.130074	8	0.487286
Trial 1	F1	P	F	0:00:54.264-0:00:54.530	BL	0.105258	8	0.394322		Trial 1	F5	UP	F	0:00:54.264-0:00:54.530	BL	0.1609	8	0.602772
Trial 1	F1	P	F	0:00:54.530-0:00:54.796	BL	0.142311	8	0.533131		Trial 1	F5	UP	F	0:00:54.530-0:00:54.796	BL	0.147025	8	0.55079
Trial 1	F1	P	F	0:00:54.796-0:00:55.062	BL	0.0454022	8	0.170089		Trial 1	F5	UP	F	0:00:54.796-0:00:55.062	BL	0.0594589	8	0.222747
Trial 1	F1	P	F	0:00:55.062-0:00:55.328	BL	0.18183	8	0.681182		Trial 1	F5	UP	F	0:00:55.062-0:00:55.328	BL	0.191051	8	0.715725
Trial 1	F1	P	F	0:00:55.328-0:00:55.594	BL	0.147533	8	0.552693		Trial 1	F5	UP	F	0:00:55.328-0:00:55.594	BL	1.63699	8	6.13258
Trial 1	F1	P	F	0:00:55.594-0:00:55.860	BL	0.162427	8	0.608499		Trial 1	F5	UP	F	0:00:55.594-0:00:55.860	BL	4.19497	8	15.7154
Trial 1	F1	P	F	0:00:55.860-0:00:56.126	BL	0.176255	8	0.660292		Trial 1	F5	UP	F	0:00:55.860-0:00:56.126	BL	5.70362	8	21.3672
Trial 1	F1	P	F	0:00:56.126-0:00:56.392	BL	0.106558	8	0.39919		Trial 1	F5	UP	F	0:00:56.126-0:00:56.392	BL	6.03037	8	22.5912
Trial 1	F1	P	F	0:00:56.392-0:00:56.658	BL	0.245934	8	0.92133		Trial 1	F5	UP	F	0:00:56.392-0:00:56.658	BL	3.39509	8	12.7189
Trial 1	F1	P	F	0:00:56.658-0:00:56.924	BL	0.102734	8	0.384866		Trial 1	F5	UP	F	0:00:56.658-0:00:56.924	BL	1.84583	8	6.91494
Trial 1	F1	P	F	0:00:56.924-0:00:57.190	BL	0.161559	7	0.691702		Trial 1	F5	UP	F	0:00:56.924-0:00:57.190	BL	2.30233	7	9.85725
Trial 1	F1	P	F	0:00:57.190-0:00:57.456	BL	0.123754	8	0.463614		Trial 1	F5	UP	F	0:00:57.190-0:00:57.456	BL	1.18932	8	4.4555
Trial 1	F1	P	F	0:00:57.456-0:00:57.722	BL	0.125192	8	0.468998		Trial 1	F5	UP	F	0:00:57.456-0:00:57.722	BL	0.362676	8	1.35867
Trial 1	F1	P	F	0:00:57.722-0:00:57.988	BL	0.246266	8	0.922572		Trial 1	F5	UP	F	0:00:57.722-0:00:57.988	BL	0.396973	8	1.48716
Trial 1	F1	P	F	0:00:57.988-0:00:58.254	BL	0.0720312	8	0.269847		Trial 1	F5	UP	F	0:00:57.988-0:00:58.254	BL	1.11966	8	4.19452
Trial 1	F1	P	F	0:00:58.254-0:00:58.520	BL	0.209094	8	0.783317		Trial 1	F5	UP	F	0:00:58.254-0:00:58.520	BL	0.843588	8	3.16029
Trial 1	F1	P	F	0:00:58.520-0:00:58.786	BL	0.0825693	8	0.309328		Trial 1	F5	UP	F	0:00:58.520-0:00:58.786	BL	0.790473	8	2.96132
Trial 1	F1	P	F	0:00:58.786-0:00:59.052	BL	0.321538	8	1.20457		Trial 1	F5	UP	F	0:00:58.786-0:00:59.052	BL	0.655642	8	2.45621
Trial 1	F1	P	F	0:00:59.052-0:00:59.318	BL	0.116564	8	0.436679		Trial 1	F5	UP	F	0:00:59.052-0:00:59.318	BL	0.292258	8	1.09488
Trial 1	F1	P	F	0:00:59.318-0:00:59.584	BL	0.114116	8	0.42751		Trial 1	F5	UP	F	0:00:59.318-0:00:59.584	BL	0.203023	8	0.760574
Trial 1	F1	P	F	0:00:59.584-0:00:59.850	BL	0.0897115	8	0.336081		Trial 1	F5	UP	F	0:00:59.584-0:00:59.850	BL	0.108825	8	0.407687
Trial 1	F1	P	F	0:00:59.850-0:01:00.116	BL	0.153361	8	0.574532		Trial 1	F5	UP	F	0:00:59.850-0:01:00.116	BL	0.0631619	8	0.236621
Trial 1	F1	P	F	0:01:00.116-0:01:00.382	BL	0.0954272	8	0.357494		Trial 1	F5	UP	F	0:01:00.116-0:01:00.382	BL	0.0809678	8	0.303324
Trial 1	F1	P	F	0:01:00.382-0:01:00.648	BL	0.0320318	8	0.12		Trial 1	F5	UP	F	0:01:00.382-0:01:00.648	BL	0.128653	8	0.481966
Trial 1	F1	P	F	0:01:00.648-0:01:00.914	BL	0.285147	8	1.06823		Trial 1	F5	UP	F	0:01:00.648-0:01:00.914	BL	0.16883	8	0.632476
Trial 1	F1	P	F	0:01:00.914-0:01:01.180	BL	0.091956	8	0.34449		Trial 1	F5	UP	F	0:01:00.914-0:01:01.180	BL	0.107865	8	0.404088
Trial 1	F1	P	F	0:01:01.180-0:01:01.446	BL	0.269679	8	1.01028		Trial 1	F5	UP	F	0:01:01.180-0:01:01.446	BL	0.461879	8	1.73031
Trial 1	F1	P	F	0:01:01.446-0:01:01.712	BL	0.0798619	8	0.299184		Trial 1	F5	UP	F	0:01:01.446-0:01:01.712	BL	0.131952	8	0.494326
Trial 1	F1	P	F	0:01:01.712-0:01:01.978	BL	0.137279	8	0.514285		Trial 1	F5	UP	F	0:01:01.712-0:01:01.978	BL	0.0812742	8	0.304474
Trial 1	F1	P	F	0:01:01.978-0:01:02.244	BL	0.0613056	8	0.229666		Trial 1	F5	UP	F	0:01:01.978-0:01:02.244	BL	0.0738199	8	0.276549
Trial 1	F1	P	F	0:01:02.244-0:01:02.510	BL	0.0523259	8	0.196025		Trial 1	F5	UP	F	0:01:02.244-0:01:02.510	BL	0.082254	8	0.308142
Trial 1	F1	P	F	0:01:02.510-0:01:02.776	BL	0.152249	8	0.570368		Trial 1	F5	UP	F	0:01:02.510-0:01:02.776	BL	0.064253	8	0.240707
Trial 1	F1	P	F	0:01:02.776-0:01:03.042	BL	0.130303	8	0.488146		Trial 1	F5	UP	F	0:01:02.776-0:01:03.042	BL	0.187203	8	0.701307
Trial 1	F1	P	F	0:01:03.042-0:01:03.308	BL	0.0685349	8	0.256748		Trial 1	F5	UP	F	0:01:03.042-0:01:03.308	BL	0.220094	8	0.824526
Trial 1	F1	P	F	0:01:03.308-0:01:03.574	BL	0.106492	8	0.398948		Trial 1	F5	UP	F	0:01:03.308-0:01:03.574	BL	0.0967189	8	0.362332
Trial 1	F1	P	F	0:01:03.574-0:01:03.840	BL	0.209549	8	0.78502		Trial 1	F5	UP	F	0:01:03.574-0:01:03.840	BL	0.260622	8	0.976349
Trial 1	F1	P	F	0:01:03.840-0:01:04.106	BL	0.163846	8	0.613808		Trial 1	F5	UP	F	0:01:03.840-0:01:04.106	BL	0.45214	8	1.69383
Trial 1	F1	P	F	0:01:04.106-0:01:04.372	BL	0.26427	8	0.99002		Trial 1	F5	UP	F	0:01:04.106-0:01:04.372	BL	0.303724	8	1.13783
Trial 1	F1	P	F	0:01:04.372-0:01:04.638	BL	0.280082	8	1.04926		Trial 1	F5	UP	F	0:01:04.372-0:01:04.638	BL	0.478087	8	1.79104
Trial 1	F1	P	F	0:01:04.638-0:01:04.904	BL	0.275367	8	1.03159		Trial 1	F5	UP	F	0:01:04.638-0:01:04.904	BL	0.94529	8	3.54128
Trial 1	F1	P	F	0:01:04.904-0:01:05.170	BL	0.122392	8	0.458508		Trial 1	F5	UP	F	0:01:04.904-0:01:05.170	BL	0.47172	8	1.76718
Trial 1	F1	P	F	0:01:05.170-0:01:05.436	BL	0.084815	8	0.317739		Trial 1	F5	UP	F	0:01:05.170-0:01:05.436	BL	0.31725	8	1.1885
Trial 1	F1	P	F	0:01:05.436-0:01:05.702	BL	0.177511	8	0.664998		Trial 1	F5	UP	F	0:01:05.436-0:01:05.702	BL	0.203741	8	0.763265
Trial 1	F1	P	F	0:01:05.702-0:01:05.968	BL	0.140208	8	0.525256		Trial 1	F5	UP	F	0:01:05.702-0:01:05.968	BL	0.117563	8	0.440421
Trial 1	F1	P	F	0:01:05.968-0:01:06.234	BL	0.121627	8	0.455646		Trial 1	F5	UP	F	0:01:05.968-0:01:06.234	BL	0.141163	8	0.528832
Trial 1	F1	P	F	0:01:06.234-0:01:06.500	BL	0.0820183	8	0.307261		Trial 1	F5	UP	F	0:01:06.234-0:01:06.500	BL	0.180433	8	0.675946
Trial 1	F1	P	F	0:01:06.500-0:01:06.766	BL	0.0703232	7	0.301082		Trial 1	F5	UP	F	0:01:06.500-0:01:06.766	BL	0.160564	7	0.687442
Trial 1	F1	P	F	0:01:06.766-0:01:07.032	BL	0.0501164	8	0.187748		Trial 1	F5	UP	F	0:01:06.766-0:01:07.032	BL	0.115668	8	0.433318
Trial 1	F1	P	F	0:01:07.032-0:01:07.298	BL	0.114536	8	0.429078		Trial 1	F5	UP	F	0:01:07.032-0:01:07.298	BL	0.145139	8	0.543726
Trial 1	F1	P	F	0:01:07.298-0:01:07.564	BL	0.093867	8	0.351649		Trial 1	F5	UP	F	0:01:07.298-0:01:07.564	BL	0.179108	8	0.670983
Trial 1	F1	P	F	0:01:07.564-0:01:07.830	BL	0.0578009	8	0.216537		Trial 1	F5	UP	F	0:01:07.564-0:01:07.830	BL	0.0868781	8	0.325467
Trial 1	F1	P	F	0:01:07.830-0:01:08.096	BL	0.105602	8	0.395616		Trial 1	F5	UP	F	0:01:07.830-0:01:08.096	BL	0.197818	8	0.741076
Trial 1	F1	P	F	0:01:08.096-0:01:08.362	BL	0.0260211	8	0.0974818		Trial 1	F5	UP	F	0:01:08.096-0:01:08.362	BL	0.0773657	8	0.289832
Trial 1	F1	P	F	0:01:08.362-0:01:08.628	BL	0.0800013	8	0.299703		Trial 1	F5	UP	F	0:01:08.362-0:01:08.628	BL	0.085457	8	0.320143
Trial 1	F1	P	F	0:01:08.628-0:01:08.894	BL	0.0137285	8	0.0514301		Trial 1	F5	UP	F	0:01:08.628-0:01:08.894	BL	0.0781505	8	0.29277
Trial 1	F1	P	F	0:01:08.894-0:01:09.160	BL	0.0691461	8	0.259038		Trial 1	F5	UP	F	0:01:08.894-0:01:09.160	BL	0.153962	8	0.576776
Trial 1	F1	P	F	0:01:09.160-0:01:09.426	BL	0.0397972	8	0.149089		Trial 1	F5	UP	F	0:01:09.160-0:01:09.426	BL	0.17112	8	0.64106
Trial 1	F1	P	F	0:01:09.426-0:01:09.692	BL	0.0695163	8	0.260426		Trial 1	F5	UP	F	0:01:09.426-0:01:09.692	BL	0.106235	8	0.397985
Trial 1	F1	P	F	0:01:09.692-0:01:09.958	BL	0.0718643	8	0.269221		Trial 1	F5	UP	F	0:01:09.692-0:01:09.958	BL	0.138042	8	0.517142
Trial 1	F1	P	F	0:01:09.958-0:01:10.224	BL	0.0241428	8	0.0904449		Trial 1	F5	UP	F	0:01:09.958-0:01:10.224	BL	0.117566	8	0.440435
Trial 1	F1	P	F	0:01:10.224-0:01:10.490	BL	0.11422	8	0.427898		Trial 1	F5	UP	F	0:01:10.224-0:01:10.490	BL	0.207626	8	0.777814
Trial 1	F1	P	F	0:01:10.490-0:01:10.756	BL	0.0568145	8	0.212842		Trial 1	F5	UP	F	0:01:10.490-0:01:10.756	BL	0.0852893	8	0.319515
Trial 1	F1	P	F	0:01:10.756-0:01:11.022	BL	0.134494	8	0.503851		Trial 1	F5	UP	F	0:01:10.756-0:01:11.022	BL	0.132547	8	0.496555
Trial 1	F1	P	F	0:01:11.022-0:01:11.288	BL	0.0705922	8	0.264457		Trial 1	F5	UP	F	0:01:11.022-0:01:11.288	BL	0.0557568	8	0.208878
Trial 1	F1	P	F	0:01:11.288-0:01:11.554	BL	0.157042	8	0.588323		Trial 1	F5	UP	F	0:01:11.288-0:01:11.554	BL	0.222316	8	0.832853
Trial 1	F1	P	F	0:01:11.554-0:01:11.820	BL	0.0673563	8	0.252332		Trial 1	F5	UP	F	0:01:11.554-0:01:11.820	BL	0.300954	8	1.12745
Trial 1	F1	P	F	0:01:11.820-0:01:12.086	BL	0.0500753	8	0.187593		Trial 1	F5	UP	F	0:01:11.820-0:01:12.086	BL	0.369199	8	1.38311
Trial 1	F1	P	F	0:01:12.086-0:01:12.352	BL	0.0975191	8	0.365334		Trial 1	F5	UP	F	0:01:12.086-0:01:12.352	BL	0.709663	8	2.6586
Trial 1	F1	P	F	0:01:12.352-0:01:12.618	BL	0.0323094	8	0.121039		Trial 1	F5	UP	F	0:01:12.352-0:01:12.618	BL	1.29343	8	4.84549
Trial 1	F1	P	F	0:01:12.618-0:01:12.884	BL	0.118164	8	0.44267		Trial 1	F5	UP	F	0:01:12.618-0:01:12.884	BL	2.80536	8	10.5096
Trial 1	F1	P	F	0:01:12.884-0:01:13.150	BL	0.0581305	8	0.217773		Trial 1	F5	UP	F	0:01:12.884-0:01:13.150	BL	3.01559	8	11.2972
Trial 1	F1	P	F	0:01:13.150-0:01:13.416	BL	0.138354	8	0.518308		Trial 1	F5	UP	F	0:01:13.150-0:01:13.416	BL	3.32448	8	12.4542
Trial 1	F1	P	F	0:01:13.416-0:01:13.682	BL	0.0785048	8	0.294099		Trial 1	F5	UP	F	0:01:13.416-0:01:13.682	BL	3.23531	8	12.1203
Trial 1	F1	P	F	0:01:13.682-0:01:13.948	BL	0.11444	8	0.428724		Trial 1	F5	UP	F	0:01:13.682-0:01:13.948	BL	4.43655	8	16.6203
Trial 1	F1	P	F	0:01:13.948-0:01:14.214	BL	0.0921599	8	0.345254		Trial 1	F5	UP	F	0:01:13.948-0:01:14.214	BL	5.39658	8	20.2171
Trial 1	F1	P	F	0:01:14.214-0:01:14.480	BL	0.146983	8	0.550632		Trial 1	F5	UP	F	0:01:14.214-0:01:14.480	BL	6.70124	8	25.105
Trial 1	F1	P	F	0:01:14.480-0:01:14.746	BL	0.101017	8	0.378436		Trial 1	F5	UP	F	0:01:14.480-0:01:14.746	BL	1.39587	8	5.2293
Trial 1	F1	P	F	0:01:14.746-0:01:15.012	BL	0.0705193	8	0.264183		Trial 1	F5	UP	F	0:01:14.746-0:01:15.012	BL	0.741964	8	2.77957
Trial 1	F1	P	F	0:01:15.012-0:01:15.278	BL	0.0901028	8	0.337546		Trial 1	F5	UP	F	0:01:15.012-0:01:15.278	BL	0.236362	8	0.88547
Trial 1	F1	P	F	0:01:15.278-0:01:15.544	BL	0.0651789	8	0.244177		Trial 1	F5	UP	F	0:01:15.278-0:01:15.544	BL	1.14806	8	4.30091
Trial 1	F1	P	F	0:01:15.544-0:01:15.810	BL	0.138007	8	0.517006		Trial 1	F5	UP	F	0:01:15.544-0:01:15.810	BL	0.980655	8	3.67378
Trial 1	F1	P	F	0:01:15.810-0:01:16.076	BL	0.0672041	7	0.287729		Trial 1	F5	UP	F	0:01:15.810-0:01:16.076	BL	1.00927	7	4.32111
Trial 1	F1	P	F	0:01:16.076-0:01:16.342	BL	0.138691	8	0.519569		Trial 1	F5	UP	F	0:01:16.076-0:01:16.342	BL	0.579913	8	2.1725
Trial 1	F1	P	F	0:01:16.342-0:01:16.608	BL	0.091749	8	0.343713		Trial 1	F5	UP	F	0:01:16.342-0:01:16.608	BL	0.245975	8	0.921482
Trial 1	F1	P	F	0:01:16.608-0:01:16.874	BL	0.0602813	8	0.225829		Trial 1	F5	UP	F	0:01:16.608-0:01:16.874	BL	3.11106	8	11.6547
Trial 1	F1	P	F	0:01:16.874-0:01:17.140	BL	0.189678	8	0.710589		Trial 1	F5	UP	F	0:01:16.874-0:01:17.140	BL	4.61969	8	17.3066
Trial 1	F1	P	F	0:01:17.140-0:01:17.406	BL	0.0620201	8	0.232342		Trial 1	F5	UP	F	0:01:17.140-0:01:17.406	BL	0.789928	8	2.95925
Trial 1	F1	P	F	0:01:17.406-0:01:17.672	BL	0.163578	8	0.612806		Trial 1	F5	UP	F	0:01:17.406-0:01:17.672	BL	0.60436	8	2.26411
Trial 1	F1	P	F	0:01:17.672-0:01:17.938	BL	0.0431862	8	0.161786		Trial 1	F5	UP	F	0:01:17.672-0:01:17.938	BL	0.861365	8	3.22687
Trial 1	F1	P	F	0:01:17.938-0:01:18.204	BL	0.0801865	8	0.300397		Trial 1	F5	UP	F	0:01:17.938-0:01:18.204	BL	1.53055	8	5.73384
Trial 1	F1	P	F	0:01:18.204-0:01:18.470	BL	0.0661472	8	0.247803		Trial 1	F5	UP	F	0:01:18.204-0:01:18.470	BL	1.70194	8	6.37591
Trial 1	F1	P	F	0:01:18.470-0:01:18.736	BL	0.0878666	8	0.329169		Trial 1	F5	UP	F	0:01:18.470-0:01:18.736	BL	0.686956	8	2.57351
Trial 1	F1	P	F	0:01:18.736-0:01:19.002	BL	0.0863006	8	0.323305		Trial 1	F5	UP	F	0:01:18.736-0:01:19.002	BL	0.413246	8	1.54813
Trial 1	F1	P	F	0:01:19.002-0:01:19.268	BL	0.034276	8	0.128406		Trial 1	F5	UP	F	0:01:19.002-0:01:19.268	BL	0.29274	8	1.09667
Trial 1	F1	P	F	0:01:19.268-0:01:19.534	BL	0.0623134	8	0.233442		Trial 1	F5	UP	F	0:01:19.268-0:01:19.534	BL	0.193249	8	0.723957
Trial 1	F1	P	F	0:01:19.534-0:01:19.800	BL	0.0958913	8	0.359232		Trial 1	F5	UP	F	0:01:19.534-0:01:19.800	BL	0.0810843	8	0.303763
Trial 1	F1	P	F	0:01:19.800-0:01:20.066	BL	0.172146	8	0.644902		Trial 1	F5	UP	F	0:01:19.800-0:01:20.066	BL	0.124692	8	0.467127
Trial 1	F1	P	F	0:01:20.066-0:01:20.332	BL	0.0735321	8	0.275469		Trial 1	F5	UP	F	0:01:20.066-0:01:20.332	BL	0.049527	8	0.18554
Trial 1	F1	P	F	0:01:20.332-0:01:20.598	BL	0.0539646	8	0.202164		Trial 1	F5	UP	F	0:01:20.332-0:01:20.598	BL	0.0571476	8	0.214089
Trial 1	F1	P	F	0:01:20.598-0:01:20.864	BL	0.0448621	8	0.168064		Trial 1	F5	UP	F	0:01:20.598-0:01:20.864	BL	0.0556257	8	0.208387
Trial 1	F1	P	F	0:01:20.864-0:01:21.130	BL	0.100918	8	0.378066		Trial 1	F5	UP	F	0:01:20.864-0:01:21.130	BL	0.0350058	8	0.13114
Trial 1	F1	P	F	0:01:21.130-0:01:21.396	BL	0.0733572	8	0.274814		Trial 1	F5	UP	F	0:01:21.130-0:01:21.396	BL	0.00914457	8	0.0342577
Trial 1	F1	P	F	0:01:21.396-0:01:21.662	BL	0.0569004	8	0.213163		Trial 1	F5	UP	F	0:01:21.396-0:01:21.662	BL	0.160494	8	0.601255
Trial 1	F1	P	F	0:01:21.662-0:01:21.928	BL	0.133869	8	0.501504		Trial 1	F5	UP	F	0:01:21.662-0:01:21.928	BL	0.0396961	8	0.148712
Trial 1	F1	P	F	0:01:21.928-0:01:22.194	BL	0.0511805	8	0.191734		Trial 1	F5	UP	F	0:01:21.928-0:01:22.194	BL	0.0238253	8	0.089255
Trial 1	F1	P	F	0:01:22.194-0:01:22.460	BL	0.137657	8	0.515697		Trial 1	F5	UP	F	0:01:22.194-0:01:22.460	BL	0.157867	8	0.591405
Trial 1	F1	P	F	0:01:22.460-0:01:22.726	BL	0.0273228	8	0.102358		Trial 1	F5	UP	F	0:01:22.460-0:01:22.726	BL	0.0529736	8	0.198451
Trial 1	F1	P	F	0:01:22.726-0:01:22.992	BL	0.0865916	8	0.324397		Trial 1	F5	UP	F	0:01:22.726-0:01:22.992	BL	0.0425488	8	0.1594
Trial 1	F1	P	F	0:01:22.992-0:01:23.258	BL	0.0692034	8	0.259252		Trial 1	F5	UP	F	0:01:22.992-0:01:23.258	BL	0.0317227	8	0.118842
Trial 1	F1	P	F	0:01:23.258-0:01:23.524	BL	0.0969718	8	0.363278		Trial 1	F5	UP	F	0:01:23.258-0:01:23.524	BL	0.0347161	8	0.130055
Trial 1	F1	P	F	0:01:23.524-0:01:23.790	BL	0.144692	8	0.542054		Trial 1	F5	UP	F	0:01:23.524-0:01:23.790	BL	0.0361681	8	0.135496
Trial 1	F1	P	F	0:01:23.790-0:01:24.056	BL	0.0470833	8	0.176385		Trial 1	F5	UP	F	0:01:23.790-0:01:24.056	BL	0.0268128	8	0.100447
Trial 1	F1	P	F	0:01:24.056-0:01:24.322	BL	0.108252	8	0.405538		Trial 1	F5	UP	F	0:01:24.056-0:01:24.322	BL	0.116326	8	0.435788
Trial 1	F1	P	F	0:01:24.322-0:01:24.588	BL	0.120534	8	0.45155		Trial 1	F5	UP	F	0:01:24.322-0:01:24.588	BL	0.376295	8	1.40969
Trial 1	F1	P	F	0:01:24.588-0:01:24.854	BL	0.122798	8	0.460029		Trial 1	F5	UP	F	0:01:24.588-0:01:24.854	BL	0.258519	8	0.968474
Trial 1	F1	P	F	0:01:24.854-0:01:25.120	BL	0.0536223	8	0.200882		Trial 1	F5	UP	F	0:01:24.854-0:01:25.120	BL	0.313437	8	1.17421
Trial 1	F1	P	F	0:01:25.120-0:01:25.386	BL	0.0980132	8	0.367183		Trial 1	F5	UP	F	0:01:25.120-0:01:25.386	BL	0.163244	8	0.611552
Trial 1	F1	P	F	0:01:25.386-0:01:25.652	BL	0.0551928	7	0.236304		Trial 1	F5	UP	F	0:01:25.386-0:01:25.652	BL	0.159475	7	0.682781
Trial 1	F1	P	F	0:01:25.652-0:01:25.918	BL	0.0639587	8	0.239608		Trial 1	F5	UP	F	0:01:25.652-0:01:25.918	BL	0.157855	8	0.591364
Trial 1	F1	P	F	0:01:25.918-0:01:26.184	BL	0.0586243	8	0.21962		Trial 1	F5	UP	F	0:01:25.918-0:01:26.184	BL	0.627012	8	2.34894
Trial 1	F1	P	F	0:01:26.184-0:01:26.450	BL	0.0326983	8	0.122497		Trial 1	F5	UP	F	0:01:26.184-0:01:26.450	BL	0.978846	8	3.667
Trial 1	F1	P	F	0:01:26.450-0:01:26.716	BL	0.0548852	8	0.205614		Trial 1	F5	UP	F	0:01:26.450-0:01:26.716	BL	1.58112	8	5.92329
Trial 1	F1	P	F	0:01:26.716-0:01:26.982	BL	0.0789112	8	0.295621		Trial 1	F5	UP	F	0:01:26.716-0:01:26.982	BL	1.68388	8	6.30821
Trial 1	F1	P	F	0:01:26.982-0:01:27.248	BL	0.0792159	8	0.296765		Trial 1	F5	UP	F	0:01:26.982-0:01:27.248	BL	1.8841	8	7.05832
Trial 1	F1	P	F	0:01:27.248-0:01:27.514	BL	0.0303291	8	0.11362		Trial 1	F5	UP	F	0:01:27.248-0:01:27.514	BL	0.488153	8	1.82874
Trial 1	F1	P	F	0:01:27.514-0:01:27.780	BL	0.0664368	8	0.248887		Trial 1	F5	UP	F	0:01:27.514-0:01:27.780	BL	0.116484	8	0.436375
Trial 1	F1	P	F	0:01:27.780-0:01:28.046	BL	0.0842764	8	0.31572		Trial 1	F5	UP	F	0:01:27.780-0:01:28.046	BL	0.0479715	8	0.179713
Trial 1	F1	P	F	0:01:28.046-0:01:28.312	BL	0.0904631	8	0.338898		Trial 1	F5	UP	F	0:01:28.046-0:01:28.312	BL	0.258913	8	0.969953
Trial 1	F1	P	F	0:01:28.312-0:01:28.578	BL	0.0441729	8	0.165482		Trial 1	F5	UP	F	0:01:28.312-0:01:28.578	BL	0.352444	8	1.32034
Trial 1	F1	P	F	0:01:28.578-0:01:28.844	BL	0.0129139	8	0.0483784		Trial 1	F5	UP	F	0:01:28.578-0:01:28.844	BL	0.17566	8	0.658065
Trial 1	F1	P	F	0:01:28.844-0:01:29.110	BL	0.0443308	8	0.166075		Trial 1	F5	UP	F	0:01:28.844-0:01:29.110	BL	0.246057	8	0.921785
Trial 1	F1	P	F	0:01:29.110-0:01:29.376	BL	0.03377	8	0.126511		Trial 1	F5	UP	F	0:01:29.110-0:01:29.376	BL	0.431835	8	1.61778
Trial 1	F1	P	F	0:01:29.376-0:01:29.642	BL	0.0859793	8	0.3221		Trial 1	F5	UP	F	0:01:29.376-0:01:29.642	BL	0.146481	8	0.548752
Trial 1	F1	P	F	0:01:29.642-0:01:29.908	BL	0.079032	8	0.296074		Trial 1	F5	UP	F	0:01:29.642-0:01:29.908	BL	0.0628494	8	0.23545
Trial 1	F1	P	F	0:01:29.908-0:01:30.174	BL	0.0712471	8	0.266908		Trial 1	F5	UP	F	0:01:29.908-0:01:30.174	BL	0.179496	8	0.672434
Trial 1	F1	P	F	0:01:30.174-0:01:30.440	BL	0.0236512	8	0.0886029		Trial 1	F5	UP	F	0:01:30.174-0:01:30.440	BL	0.0288658	8	0.108138
Trial 1	F1	P	F	0:01:30.440-0:01:30.706	BL	0.0285145	8	0.106822		Trial 1	F5	UP	F	0:01:30.440-0:01:30.706	BL	0.0454725	8	0.17035
Trial 1	F1	P	F	0:01:30.706-0:01:30.972	BL	0.0351922	8	0.131838		Trial 1	F5	UP	F	0:01:30.706-0:01:30.972	BL	0.0811414	8	0.303977
Trial 1	F1	P	F	0:01:30.972-0:01:31.238	BL	0.0131904	8	0.0494145		Trial 1	F5	UP	F	0:01:30.972-0:01:31.238	BL	0.0685239	8	0.256707
Trial 1	F1	P	F	0:01:31.238-0:01:31.504	BL	0.0700646	8	0.262478		Trial 1	F5	UP	F	0:01:31.238-0:01:31.504	BL	0.0896771	8	0.335951
Trial 1	F1	P	F	0:01:31.504-0:01:31.770	BL	0.0621602	8	0.232867		Trial 1	F5	UP	F	0:01:31.504-0:01:31.770	BL	0.0496724	8	0.186086
Trial 1	F1	P	F	0:01:31.770-0:01:32.036	BL	0.0621737	8	0.232918		Trial 1	F5	UP	F	0:01:31.770-0:01:32.036	BL	0.0291854	8	0.109336
Trial 1	F1	P	F	0:01:32.036-0:01:32.302	BL	0.0423849	8	0.158784		Trial 1	F5	UP	F	0:01:32.036-0:01:32.302	BL	0.0297865	8	0.111587
Trial 1	F1	P	F	0:01:32.302-0:01:32.568	BL	0.0786899	8	0.294794		Trial 1	F5	UP	F	0:01:32.302-0:01:32.568	BL	0.281123	8	1.05315
Trial 1	F1	P	F	0:01:32.568-0:01:32.834	BL	0.0882545	8	0.330624		Trial 1	F5	UP	F	0:01:32.568-0:01:32.834	BL	0.0524495	8	0.196489
Trial 1	F1	P	F	0:01:32.834-0:01:33.100	BL	0.0547249	8	0.205013		Trial 1	F5	UP	F	0:01:32.834-0:01:33.100	BL	0.0515585	8	0.19315
Trial 1	F1	P	F	0:01:33.100-0:01:33.366	BL	0.0623293	8	0.233502		Trial 1	F5	UP	F	0:01:33.100-0:01:33.366	BL	0.0641652	8	0.240379
Trial 1	F1	P	F	0:01:33.366-0:01:33.632	BL	0.0477489	8	0.178879		Trial 1	F5	UP	F	0:01:33.366-0:01:33.632	BL	0.0462973	8	0.173441
Trial 1	F1	P	F	0:01:33.632-0:01:33.898	BL	0.129592	8	0.485485		Trial 1	F5	UP	F	0:01:33.632-0:01:33.898	BL	0.124158	8	0.465126
Trial 1	F1	P	F	0:01:33.898-0:01:34.164	BL	0.1242	8	0.465284		Trial 1	F5	UP	F	0:01:33.898-0:01:34.164	BL	0.0737086	8	0.276132
Trial 1	F1	P	F	0:01:34.164-0:01:34.430	BL	0.156872	8	0.58768		Trial 1	F5	UP	F	0:01:34.164-0:01:34.430	BL	0.386088	8	1.44637
Trial 1	F1	P	F	0:01:34.430-0:01:34.696	BL	0.175565	8	0.657707		Trial 1	F5	UP	F	0:01:34.430-0:01:34.696	BL	0.255998	8	0.959032
Trial 1	F1	P	F	0:01:34.696-0:01:34.962	BL	0.197011	8	0.738051		Trial 1	F5	UP	F	0:01:34.696-0:01:34.962	BL	0.121966	8	0.456916
Trial 1	F1	P	F	0:01:34.962-0:01:35.228	BL	0.186808	7	0.799802		Trial 1	F5	UP	F	0:01:34.962-0:01:35.228	BL	0.093659	7	0.400997
Trial 1	F1	P	F	0:01:35.228-0:01:35.494	BL	0.124474	8	0.466312		Trial 1	F5	UP	F	0:01:35.228-0:01:35.494	BL	0.0666927	8	0.249846
Trial 1	F1	P	F	0:01:35.494-0:01:35.760	BL	0.173101	8	0.64848		Trial 1	F5	UP	F	0:01:35.494-0:01:35.760	BL	0.0796302	8	0.298315
Trial 1	F1	P	F	0:01:35.760-0:01:36.026	BL	0.109533	8	0.410337		Trial 1	F5	UP	F	0:01:35.760-0:01:36.026	BL	0.0371224	8	0.13907
Trial 1	F1	P	F	0:01:36.026-0:01:36.292	BL	0.122356	8	0.458374		Trial 1	F5	UP	F	0:01:36.026-0:01:36.292	BL	0.110941	8	0.415613
Trial 1	F1	P	F	0:01:36.292-0:01:36.558	BL	0.0696528	8	0.260935		Trial 1	F5	UP	F	0:01:36.292-0:01:36.558	BL	0.0650764	8	0.243794
Trial 1	F1	P	F	0:01:36.558-0:01:36.824	BL	0.0878303	8	0.329034		Trial 1	F5	UP	F	0:01:36.558-0:01:36.824	BL	0.0475797	8	0.178245
Trial 1	F1	P	F	0:01:36.824-0:01:37.090	BL	0.258563	8	0.968644		Trial 1	F5	UP	F	0:01:36.824-0:01:37.090	BL	0.0273639	8	0.102511
Trial 1	F1	P	F	0:01:37.090-0:01:37.356	BL	0.128272	8	0.48054		Trial 1	F5	UP	F	0:01:37.090-0:01:37.356	BL	0.0808629	8	0.302931
Trial 1	F1	P	F	0:01:37.356-0:01:37.622	BL	0.136164	8	0.510104		Trial 1	F5	UP	F	0:01:37.356-0:01:37.622	BL	0.0879524	8	0.32949
Trial 1	F1	P	F	0:01:37.622-0:01:37.888	BL	0.280424	8	1.05053		Trial 1	F5	UP	F	0:01:37.622-0:01:37.888	BL	0.0267273	8	0.100127
Trial 1	F1	P	F	0:01:37.888-0:01:38.154	BL	0.267016	8	1.00032		Trial 1	F5	UP	F	0:01:37.888-0:01:38.154	BL	0.0973281	8	0.364617
Trial 1	F1	P	F	0:01:38.154-0:01:38.420	BL	0.217326	8	0.814159		Trial 1	F5	UP	F	0:01:38.154-0:01:38.420	BL	0.0538228	8	0.201633
Trial 1	F1	P	F	0:01:38.420-0:01:38.686	BL	0.26743	8	1.00186		Trial 1	F5	UP	F	0:01:38.420-0:01:38.686	BL	0.139143	8	0.521264
Trial 1	F1	P	F	0:01:38.686-0:01:38.952	BL	0.111924	8	0.419293		Trial 1	F5	UP	F	0:01:38.686-0:01:38.952	BL	0.311295	8	1.1662
Trial 1	F1	P	F	0:01:38.952-0:01:39.218	BL	0.140998	8	0.528214		Trial 1	F5	UP	F	0:01:38.952-0:01:39.218	BL	0.690149	8	2.58546
Trial 1	F1	P	F	0:01:39.218-0:01:39.484	BL	0.070117	8	0.262677		Trial 1	F5	UP	F	0:01:39.218-0:01:39.484	BL	1.10431	8	4.13701
Trial 1	F1	P	F	0:01:39.484-0:01:39.750	BL	0.0970112	8	0.363427		Trial 1	F5	UP	F	0:01:39.484-0:01:39.750	BL	2.17536	8	8.14941
Trial 1	F1	P	F	0:01:39.750-0:01:40.016	BL	0.0713753	8	0.267391		Trial 1	F5	UP	F	0:01:39.750-0:01:40.016	BL	2.80222	8	10.4978
Trial 1	F1	P	F	0:01:40.016-0:01:40.282	BL	0.0591363	8	0.221539		Trial 1	F5	UP	F	0:01:40.016-0:01:40.282	BL	3.04997	8	11.4259
Trial 1	F1	P	F	0:01:40.282-0:01:40.548	BL	0.097284	8	0.364448		Trial 1	F5	UP	F	0:01:40.282-0:01:40.548	BL	2.39566	8	8.97471
Trial 1	F1	P	F	0:01:40.548-0:01:40.814	BL	0.115378	8	0.432233		Trial 1	F5	UP	F	0:01:40.548-0:01:40.814	BL	1.64199	8	6.15132
Trial 1	F1	P	F	0:01:40.814-0:01:41.080	BL	0.112875	8	0.422862		Trial 1	F5	UP	F	0:01:40.814-0:01:41.080	BL	0.282874	8	1.05972
Trial 1	F1	P	F	0:01:41.080-0:01:41.346	BL	0.0322438	8	0.120794		Trial 1	F5	UP	F	0:01:41.080-0:01:41.346	BL	0.509041	8	1.90701
Trial 1	F1	P	F	0:01:41.346-0:01:41.612	BL	0.0680258	8	0.254841		Trial 1	F5	UP	F	0:01:41.346-0:01:41.612	BL	1.50786	8	5.64882
Trial 1	F1	P	F	0:01:41.612-0:01:41.878	BL	0.0791324	8	0.29645		Trial 1	F5	UP	F	0:01:41.612-0:01:41.878	BL	0.578584	8	2.16752
Trial 1	F1	P	F	0:01:41.878-0:01:42.144	BL	0.0746187	8	0.27954		Trial 1	F5	UP	F	0:01:41.878-0:01:42.144	BL	0.947301	8	3.54883
Trial 1	F1	P	F	0:01:42.144-0:01:42.410	BL	0.0772066	8	0.289235		Trial 1	F5	UP	F	0:01:42.144-0:01:42.410	BL	3.12789	8	11.7179
Trial 1	F1	P	F	0:01:42.410-0:01:42.676	BL	0.0349585	8	0.130965		Trial 1	F5	UP	F	0:01:42.410-0:01:42.676	BL	2.79926	8	10.4868
Trial 1	F1	P	F	0:01:42.676-0:01:42.942	BL	0.0828143	8	0.310243		Trial 1	F5	UP	F	0:01:42.676-0:01:42.942	BL	2.53265	8	9.48792
Trial 1	F1	P	F	0:01:42.942-0:01:43.208	BL	0.0646242	8	0.242098		Trial 1	F5	UP	F	0:01:42.942-0:01:43.208	BL	1.87218	8	7.01363
Trial 1	F1	P	F	0:01:43.208-0:01:43.474	BL	0.0771844	8	0.289152		Trial 1	F5	UP	F	0:01:43.208-0:01:43.474	BL	1.08286	8	4.05667
Trial 1	F1	P	F	0:01:43.474-0:01:43.740	BL	0.0397384	8	0.14887		Trial 1	F5	UP	F	0:01:43.474-0:01:43.740	BL	0.193181	8	0.723704
Trial 1	F1	P	F	0:01:43.740-0:01:44.006	BL	0.102978	8	0.385786		Trial 1	F5	UP	F	0:01:43.740-0:01:44.006	BL	0.413757	8	1.55005
Trial 1	F1	P	F	0:01:44.006-0:01:44.272	BL	0.0913171	8	0.342096		Trial 1	F5	UP	F	0:01:44.006-0:01:44.272	BL	0.526578	8	1.97268
Trial 1	F1	P	F	0:01:44.272-0:01:44.538	BL	0.0773174	8	0.289649		Trial 1	F5	UP	F	0:01:44.272-0:01:44.538	BL	0.424749	8	1.59121
Trial 1	F1	P	F	0:01:44.538-0:01:44.804	BL	0.102009	7	0.436745		Trial 1	F5	UP	F	0:01:44.538-0:01:44.804	BL	0.188	7	0.804914
Trial 1	F1	P	F	0:01:44.804-0:01:45.070	BL	0.0639245	8	0.239478		Trial 1	F5	UP	F	0:01:44.804-0:01:45.070	BL	0.0501524	8	0.187884
Trial 1	F1	P	F	0:01:45.070-0:01:45.336	BL	0.118788	8	0.445007		Trial 1	F5	UP	F	0:01:45.070-0:01:45.336	BL	0.110627	8	0.414432
Trial 1	F1	P	F	0:01:45.336-0:01:45.602	BL	0.0557866	8	0.208992		Trial 1	F5	UP	F	0:01:45.336-0:01:45.602	BL	0.0404744	8	0.151627
Trial 1	F1	P	F	0:01:45.602-0:01:45.868	BL	0.0759343	8	0.284468		Trial 1	F5	UP	F	0:01:45.602-0:01:45.868	BL	0.112704	8	0.422216
Trial 1	F1	P	F	0:01:45.868-0:01:46.134	BL	0.0642893	8	0.240844		Trial 1	F5	UP	F	0:01:45.868-0:01:46.134	BL	0.028223	8	0.105731
Trial 1	F1	P	F	0:01:46.134-0:01:46.400	BL	0.0979895	8	0.367093		Trial 1	F5	UP	F	0:01:46.134-0:01:46.400	BL	0.0725638	8	0.271841
Trial 1	F1	P	F	0:01:46.400-0:01:46.666	BL	0.0546612	8	0.204773		Trial 1	F5	UP	F	0:01:46.400-0:01:46.666	BL	0.0787333	8	0.294954
Trial 1	F1	P	F	0:01:46.666-0:01:46.932	BL	0.050973	8	0.190959		Trial 1	F5	UP	F	0:01:46.666-0:01:46.932	BL	0.196121	8	0.734729
Trial 1	F1	P	F	0:01:46.932-0:01:47.198	BL	0.0261608	8	0.0980052		Trial 1	F5	UP	F	0:01:46.932-0:01:47.198	BL	0.186369	8	0.698179
Trial 1	F1	P	F	0:01:47.198-0:01:47.464	BL	0.0230977	8	0.0865293		Trial 1	F5	UP	F	0:01:47.198-0:01:47.464	BL	0.0539004	8	0.201925
Trial 1	F1	P	F	0:01:47.464-0:01:47.730	BL	0.0636788	8	0.238557		Trial 1	F5	UP	F	0:01:47.464-0:01:47.730	BL	0.32428	8	1.21483
Trial 1	F1	P	F	0:01:47.730-0:01:47.996	BL	0.0586105	8	0.219568		Trial 1	F5	UP	F	0:01:47.730-0:01:47.996	BL	0.64475	8	2.41538
Trial 1	F1	P	F	0:01:47.996-0:01:48.262	BL	0.174359	8	0.653192		Trial 1	F5	UP	F	0:01:47.996-0:01:48.262	BL	0.84785	8	3.17626
Trial 1	F1	P	F	0:01:48.262-0:01:48.528	BL	0.0745399	8	0.279244		Trial 1	F5	UP	F	0:01:48.262-0:01:48.528	BL	0.981113	8	3.67548
Trial 1	F1	P	F	0:01:48.528-0:01:48.794	BL	0.116061	8	0.43479		Trial 1	F5	UP	F	0:01:48.528-0:01:48.794	BL	1.60315	8	6.0058
Trial 1	F1	P	F	0:01:48.794-0:01:49.060	BL	0.0750056	8	0.280989		Trial 1	F5	UP	F	0:01:48.794-0:01:49.060	BL	1.44655	8	5.41915
Trial 1	F1	P	F	0:01:49.060-0:01:49.326	BL	0.111407	8	0.417355		Trial 1	F5	UP	F	0:01:49.060-0:01:49.326	BL	0.759362	8	2.84474
Trial 1	F1	P	F	0:01:49.326-0:01:49.592	BL	0.0903479	8	0.338465		Trial 1	F5	UP	F	0:01:49.326-0:01:49.592	BL	1.08283	8	4.05657
Trial 1	F1	P	F	0:01:49.592-0:01:49.858	BL	0.0637868	8	0.238962		Trial 1	F5	UP	F	0:01:49.592-0:01:49.858	BL	1.40478	8	5.26263
Trial 1	F1	P	F	0:01:49.858-0:01:50.124	BL	0.135729	8	0.508475		Trial 1	F5	UP	F	0:01:49.858-0:01:50.124	BL	1.74422	8	6.53429
Trial 1	F1	P	F	0:01:50.124-0:01:50.390	BL	0.202209	8	0.757521		Trial 1	F5	UP	F	0:01:50.124-0:01:50.390	BL	1.72371	8	6.45746
Trial 1	F1	P	F	0:01:50.390-0:01:50.656	BL	0.173886	8	0.651415		Trial 1	F5	UP	F	0:01:50.390-0:01:50.656	BL	0.651654	8	2.44125
Trial 1	F1	P	F	0:01:50.656-0:01:50.922	BL	0.208961	8	0.78282		Trial 1	F5	UP	F	0:01:50.656-0:01:50.922	BL	0.483093	8	1.80979
Trial 1	F1	P	F	0:01:50.922-0:01:51.188	BL	0.131673	8	0.493279		Trial 1	F5	UP	F	0:01:50.922-0:01:51.188	BL	0.89358	8	3.34757
Trial 1	F1	P	F	0:01:51.188-0:01:51.454	BL	0.0875971	8	0.328159		Trial 1	F5	UP	F	0:01:51.188-0:01:51.454	BL	0.645737	8	2.41909
Trial 1	F1	P	F	0:01:51.454-0:01:51.720	BL	0.0817629	8	0.306306		Trial 1	F5	UP	F	0:01:51.454-0:01:51.720	BL	0.194033	8	0.726899
Trial 1	F1	P	F	0:01:51.720-0:01:51.986	BL	0.101153	8	0.378943		Trial 1	F5	UP	F	0:01:51.720-0:01:51.986	BL	0.189707	8	0.710689
Trial 1	F1	P	F	0:01:51.986-0:01:52.252	BL	0.109913	8	0.411762		Trial 1	F5	UP	F	0:01:51.986-0:01:52.252	BL	0.126388	8	0.473481
Trial 1	F1	P	F	0:01:52.252-0:01:52.518	BL	0.089829	8	0.336523		Trial 1	F5	UP	F	0:01:52.252-0:01:52.518	BL	0.132115	8	0.494935
Trial 1	F1	P	F	0:01:52.518-0:01:52.784	BL	0.0749127	8	0.280641		Trial 1	F5	UP	F	0:01:52.518-0:01:52.784	BL	0.141881	8	0.531523
Trial 1	F1	P	F	0:01:52.784-0:01:53.050	BL	0.138313	8	0.518158		Trial 1	F5	UP	F	0:01:52.784-0:01:53.050	BL	0.0820832	8	0.307508
Trial 1	F1	P	F	0:01:53.050-0:01:53.316	BL	0.0704403	8	0.263888		Trial 1	F5	UP	F	0:01:53.050-0:01:53.316	BL	0.0907077	8	0.339812
Trial 1	F1	P	F	0:01:53.316-0:01:53.582	BL	0.0598354	8	0.224159		Trial 1	F5	UP	F	0:01:53.316-0:01:53.582	BL	0.107498	8	0.402718
Trial 1	F1	P	F	0:01:53.582-0:01:53.848	BL	0.051595	8	0.193287		Trial 1	F5	UP	F	0:01:53.582-0:01:53.848	BL	0.065144	8	0.244046
Trial 1	F1	P	F	0:01:53.848-0:01:54.114	BL	0.0354844	7	0.151923		Trial 1	F5	UP	F	0:01:53.848-0:01:54.114	BL	0.0346524	7	0.148362
Trial 1	F1	P	F	0:01:54.114-0:01:54.380	BL	0.104227	8	0.390458		Trial 1	F5	UP	F	0:01:54.114-0:01:54.380	BL	0.0819259	8	0.306917
Trial 1	F1	P	F	0:01:54.380-0:01:54.646	BL	0.0598622	8	0.224259		Trial 1	F5	UP	F	0:01:54.380-0:01:54.646	BL	0.0245056	8	0.091804
Trial 1	F1	P	F	0:01:54.646-0:01:54.912	BL	0.0927169	8	0.34734		Trial 1	F5	UP	F	0:01:54.646-0:01:54.912	BL	0.0854453	8	0.320098
Trial 1	F1	P	F	0:01:54.912-0:01:55.178	BL	0.0283767	8	0.106307		Trial 1	F5	UP	F	0:01:54.912-0:01:55.178	BL	0.063853	8	0.239211
Trial 1	F1	P	F	0:01:55.178-0:01:55.444	BL	0.100344	8	0.375912		Trial 1	F5	UP	F	0:01:55.178-0:01:55.444	BL	0.271494	8	1.01708
Trial 1	F1	P	F	0:01:55.444-0:01:55.710	BL	0.0342517	8	0.128316		Trial 1	F5	UP	F	0:01:55.444-0:01:55.710	BL	0.365547	8	1.36943
Trial 1	F1	P	F	0:01:55.710-0:01:55.976	BL	0.0708281	8	0.26534		Trial 1	F5	UP	F	0:01:55.710-0:01:55.976	BL	1.57258	8	5.89129
Trial 1	F1	P	F	0:01:55.976-0:01:56.242	BL	0.120525	8	0.451517		Trial 1	F5	UP	F	0:01:55.976-0:01:56.242	BL	4.80575	8	18.0035
Trial 1	F1	P	F	0:01:56.242-0:01:56.508	BL	0.0568381	8	0.212932		Trial 1	F5	UP	F	0:01:56.242-0:01:56.508	BL	5.65777	8	21.1955
Trial 1	F1	P	F	0:01:56.508-0:01:56.774	BL	0.0894963	8	0.335274		Trial 1	F5	UP	F	0:01:56.508-0:01:56.774	BL	4.7318	8	17.7265
Trial 1	F1	P	F	0:01:56.774-0:01:57.040	BL	0.0749268	8	0.280696		Trial 1	F5	UP	F	0:01:56.774-0:01:57.040	BL	2.86541	8	10.7345
Trial 1	F1	P	F	0:01:57.040-0:01:57.306	BL	0.124239	8	0.465427		Trial 1	F5	UP	F	0:01:57.040-0:01:57.306	BL	5.1007	8	19.1086
Trial 1	F1	P	F	0:01:57.306-0:01:57.572	BL	0.080214	8	0.3005		Trial 1	F5	UP	F	0:01:57.306-0:01:57.572	BL	1.86437	8	6.98437
Trial 1	F1	P	F	0:01:57.572-0:01:57.838	BL	0.1104	8	0.413585		Trial 1	F5	UP	F	0:01:57.572-0:01:57.838	BL	0.20657	8	0.773866
Trial 1	F1	P	F	0:01:57.838-0:01:58.104	BL	0.110931	8	0.415576		Trial 1	F5	UP	F	0:01:57.838-0:01:58.104	BL	0.469854	8	1.76019
Trial 1	F1	P	F	0:01:58.104-0:01:58.370	BL	0.0660892	8	0.247588		Trial 1	F5	UP	F	0:01:58.104-0:01:58.370	BL	0.845461	8	3.16732
Trial 1	F1	P	F	0:01:58.370-0:01:58.636	BL	0.0692268	8	0.25934		Trial 1	F5	UP	F	0:01:58.370-0:01:58.636	BL	1.44376	8	5.40868
Trial 1	F1	P	F	0:01:58.636-0:01:58.902	BL	0.0554144	8	0.207596		Trial 1	F5	UP	F	0:01:58.636-0:01:58.902	BL	1.64106	8	6.1478
Trial 1	F1	P	F	0:01:58.902-0:01:59.168	BL	0.135131	8	0.506236		Trial 1	F5	UP	F	0:01:58.902-0:01:59.168	BL	1.79778	8	6.73495
Trial 1	F1	P	F	0:01:59.168-0:01:59.434	BL	0.0347729	8	0.130268		Trial 1	F5	UP	F	0:01:59.168-0:01:59.434	BL	2.12936	8	7.97707
Trial 1	F1	P	F	0:01:59.434-0:01:59.700	BL	0.057138	8	0.214054		Trial 1	F5	UP	F	0:01:59.434-0:01:59.700	BL	1.50067	8	5.62189
Trial 1	F1	P	F	0:01:59.700-0:01:59.966	BL	0.0624441	8	0.233931		Trial 1	F5	UP	F	0:01:59.700-0:01:59.966	BL	0.897464	8	3.36213
Trial 1	F1	P	F	0:01:59.966-0:02:00.232	BL	0.104154	8	0.390186		Trial 1	F5	UP	F	0:01:59.966-0:02:00.232	BL	0.905491	8	3.39218
Trial 1	F1	P	F	0:02:00.232-0:02:00.498	BL	0.0562056	8	0.210561		Trial 1	F5	UP	F	0:02:00.232-0:02:00.498	BL	0.737823	8	2.76407
Trial 1	F1	P	F	0:02:00.498-0:02:00.764	BL	0.104527	8	0.391583		Trial 1	F5	UP	F	0:02:00.498-0:02:00.764	BL	3.53959	8	13.2602
Trial 1	F1	P	F	0:02:00.764-0:02:01.030	BL	0.0901703	8	0.337804		Trial 1	F5	UP	F	0:02:00.764-0:02:01.030	BL	1.76226	8	6.60189
Trial 1	F1	P	F	0:02:01.030-0:02:01.296	BL	0.0494471	8	0.185241		Trial 1	F5	UP	F	0:02:01.030-0:02:01.296	BL	0.27567	8	1.03273
Trial 1	F1	P	F	0:02:01.296-0:02:01.562	BL	0.107586	8	0.403045		Trial 1	F5	UP	F	0:02:01.296-0:02:01.562	BL	0.172105	8	0.644747
Trial 1	F1	P	F	0:02:01.562-0:02:01.828	BL	0.240866	8	0.90235		Trial 1	F5	UP	F	0:02:01.562-0:02:01.828	BL	0.325522	8	1.21949
Trial 1	F1	P	F	0:02:01.828-0:02:02.094	BL	0.15002	8	0.562011		Trial 1	F5	UP	F	0:02:01.828-0:02:02.094	BL	0.530556	8	1.98759
Trial 1	F1	P	F	0:02:02.094-0:02:02.360	BL	0.0826907	8	0.309782		Trial 1	F5	UP	F	0:02:02.094-0:02:02.360	BL	1.03001	8	3.85868
Trial 1	F1	P	F	0:02:02.360-0:02:02.626	BL	0.0627899	8	0.235227		Trial 1	F5	UP	F	0:02:02.360-0:02:02.626	BL	0.699491	8	2.62045
Trial 1	F1	P	F	0:02:02.626-0:02:02.892	BL	0.0807736	8	0.302597		Trial 1	F5	UP	F	0:02:02.626-0:02:02.892	BL	0.192091	8	0.71962
Trial 1	F1	P	F	0:02:02.892-0:02:03.158	BL	0.12065	8	0.451985		Trial 1	F5	UP	F	0:02:02.892-0:02:03.158	BL	0.0609454	8	0.228316
Trial 1	F1	P	F	0:02:03.158-0:02:03.424	BL	0.0924181	8	0.346221		Trial 1	F5	UP	F	0:02:03.158-0:02:03.424	BL	0.0482729	8	0.180842
Trial 1	F1	P	F	0:02:03.424-0:02:03.690	BL	0.093351	7	0.399674		Trial 1	F5	UP	F	0:02:03.424-0:02:03.690	BL	0.00746661	7	0.0319677
Trial 1	F1	P	F	0:02:03.690-0:02:03.956	BL	0.13361	8	0.500541		Trial 1	F5	UP	F	0:02:03.690-0:02:03.956	BL	0.0548692	8	0.205553
Trial 1	F1	P	F	0:02:03.956-0:02:04.222	BL	0.0334651	8	0.125369		Trial 1	F5	UP	F	0:02:03.956-0:02:04.222	BL	0.436099	8	1.63374
Trial 1	F1	P	F	0:02:04.222-0:02:04.488	BL	0.0897851	8	0.336357		Trial 1	F5	UP	F	0:02:04.222-0:02:04.488	BL	0.334918	8	1.25469
Trial 1	F1	P	F	0:02:04.488-0:02:04.754	BL	0.0279549	8	0.104727		Trial 1	F5	UP	F	0:02:04.488-0:02:04.754	BL	0.309293	8	1.15869
Trial 1	F1	P	F	0:02:04.754-0:02:05.020	BL	0.0723427	8	0.271015		Trial 1	F5	UP	F	0:02:04.754-0:02:05.020	BL	0.681226	8	2.55203
Trial 1	F1	P	F	0:02:05.020-0:02:05.286	BL	0.0625715	8	0.234409		Trial 1	F5	UP	F	0:02:05.020-0:02:05.286	BL	0.471989	8	1.76819
Trial 1	F1	P	F	0:02:05.286-0:02:05.552	BL	0.066747	8	0.250051		Trial 1	F5	UP	F	0:02:05.286-0:02:05.552	BL	0.265893	8	0.9961
Trial 1	F1	P	F	0:02:05.552-0:02:05.818	BL	0.0622839	8	0.233331		Trial 1	F5	UP	F	0:02:05.552-0:02:05.818	BL	0.048342	8	0.181102
Trial 1	F1	P	F	0:02:05.818-0:02:06.084	BL	0.0293844	8	0.110081		Trial 1	F5	UP	F	0:02:05.818-0:02:06.084	BL	0.0129499	8	0.0485136
Trial 1	F1	P	F	0:02:06.084-0:02:06.350	BL	0.0560238	8	0.209879		Trial 1	F5	UP	F	0:02:06.084-0:02:06.350	BL	0.74495	8	2.79077
Trial 1	F1	P	F	0:02:06.350-0:02:06.616	BL	0.0212814	8	0.0797257		Trial 1	F5	UP	F	0:02:06.350-0:02:06.616	BL	0.803062	8	3.00847
Trial 1	F1	P	F	0:02:06.616-0:02:06.882	BL	0.110129	8	0.412568		Trial 1	F5	UP	F	0:02:06.616-0:02:06.882	BL	1.50415	8	5.63489
Trial 1	F1	P	F	0:02:06.882-0:02:07.148	BL	0.0347964	8	0.130356		Trial 1	F5	UP	F	0:02:06.882-0:02:07.148	BL	4.93246	8	18.4781
Trial 1	F1	P	F	0:02:07.148-0:02:07.414	BL	0.092079	8	0.344951		Trial 1	F5	UP	F	0:02:07.148-0:02:07.414	BL	3.57247	8	13.3834
Trial 1	F1	P	F	0:02:07.414-0:02:07.680	BL	0.0605804	8	0.226948		Trial 1	F5	UP	F	0:02:07.414-0:02:07.680	BL	1.64979	8	6.18051
Trial 1	F1	P	F	0:02:07.680-0:02:07.946	BL	0.079541	8	0.297982		Trial 1	F5	UP	F	0:02:07.680-0:02:07.946	BL	1.72244	8	6.45269
Trial 1	F1	P	F	0:02:07.946-0:02:08.212	BL	0.0816147	8	0.305748		Trial 1	F5	UP	F	0:02:07.946-0:02:08.212	BL	2.89804	8	10.8568
Trial 1	F1	P	F	0:02:08.212-0:02:08.478	BL	0.0251518	8	0.094225		Trial 1	F5	UP	F	0:02:08.212-0:02:08.478	BL	1.77459	8	6.64807
Trial 1	F1	P	F	0:02:08.478-0:02:08.744	BL	0.106479	8	0.398895		Trial 1	F5	UP	F	0:02:08.478-0:02:08.744	BL	0.466429	8	1.74737
Trial 1	F1	P	F	0:02:08.744-0:02:09.010	BL	0.0950079	8	0.355922		Trial 1	F5	UP	F	0:02:08.744-0:02:09.010	BL	0.765037	8	2.86602
Trial 1	F1	P	F	0:02:09.010-0:02:09.276	BL	0.0738427	8	0.276633		Trial 1	F5	UP	F	0:02:09.010-0:02:09.276	BL	0.994975	8	3.72743
Trial 1	F1	P	F	0:02:09.276-0:02:09.542	BL	0.0487732	8	0.182716		Trial 1	F5	UP	F	0:02:09.276-0:02:09.542	BL	0.741349	8	2.77727
Trial 1	F1	P	F	0:02:09.542-0:02:09.808	BL	0.0450387	8	0.168727		Trial 1	F5	UP	F	0:02:09.542-0:02:09.808	BL	0.273844	8	1.02588
Trial 1	F1	P	F	0:02:09.808-0:02:10.074	BL	0.0383405	8	0.143634		Trial 1	F5	UP	F	0:02:09.808-0:02:10.074	BL	0.367005	8	1.3749
Trial 1	F1	P	F	0:02:10.074-0:02:10.340	BL	0.0750917	8	0.281313		Trial 1	F5	UP	F	0:02:10.074-0:02:10.340	BL	0.689755	8	2.58399
Trial 1	F1	P	F	0:02:10.340-0:02:10.606	BL	0.0754663	8	0.282715		Trial 1	F5	UP	F	0:02:10.340-0:02:10.606	BL	0.590508	8	2.2122
Trial 1	F1	P	F	0:02:10.606-0:02:10.872	BL	0.0543244	8	0.203512		Trial 1	F5	UP	F	0:02:10.606-0:02:10.872	BL	0.865196	8	3.24123
Trial 1	F1	P	F	0:02:10.872-0:02:11.138	BL	0.10682	8	0.400175		Trial 1	F5	UP	F	0:02:10.872-0:02:11.138	BL	0.351954	8	1.3185
Trial 1	F1	P	F	0:02:11.138-0:02:11.404	BL	0.0515484	8	0.193114		Trial 1	F5	UP	F	0:02:11.138-0:02:11.404	BL	0.303585	8	1.13731
Trial 1	F1	P	F	0:02:11.404-0:02:11.670	BL	0.0646899	8	0.242343		Trial 1	F5	UP	F	0:02:11.404-0:02:11.670	BL	0.207311	8	0.776639
Trial 1	F1	P	F	0:02:11.670-0:02:11.936	BL	0.0878075	8	0.328951		Trial 1	F5	UP	F	0:02:11.670-0:02:11.936	BL	0.125824	8	0.471366
Trial 1	F1	P	F	0:02:11.936-0:02:12.202	BL	0.07853	8	0.294192		Trial 1	F5	UP	F	0:02:11.936-0:02:12.202	BL	0.110366	8	0.413459
Trial 1	F1	P	F	0:02:12.202-0:02:12.468	BL	0.11847	8	0.443817		Trial 1	F5	UP	F	0:02:12.202-0:02:12.468	BL	0.0749234	8	0.280683
Trial 1	F1	P	F	0:02:12.468-0:02:12.734	BL	0.0719453	8	0.269525		Trial 1	F5	UP	F	0:02:12.468-0:02:12.734	BL	0.108233	8	0.405468
Trial 1	F1	P	F	0:02:12.734-0:02:13.000	BL	0.164242	8	0.615292		Trial 1	F5	UP	F	0:02:12.734-0:02:13.000	BL	0.157571	8	0.590302
Trial 1	F1	P	F	0:02:13.000-0:02:13.266	BL	0.0451916	7	0.193484		Trial 1	F5	UP	F	0:02:13.000-0:02:13.266	BL	0.0326945	7	0.139979
Trial 1	F1	P	F	0:02:13.266-0:02:13.532	BL	0.0811793	8	0.304116		Trial 1	F5	UP	F	0:02:13.266-0:02:13.532	BL	0.22474	8	0.84193
Trial 1	F1	P	F	0:02:13.532-0:02:13.798	BL	0.0534227	8	0.200134		Trial 1	F5	UP	F	0:02:13.532-0:02:13.798	BL	0.0587564	8	0.220116
Trial 1	F1	P	F	0:02:13.798-0:02:14.064	BL	0.0837676	8	0.313813		Trial 1	F5	UP	F	0:02:13.798-0:02:14.064	BL	0.235196	8	0.881105
Trial 1	F1	P	F	0:02:14.064-0:02:14.330	BL	0.0627734	8	0.235166		Trial 1	F5	UP	F	0:02:14.064-0:02:14.330	BL	0.22247	8	0.83343
Trial 1	F1	P	F	0:02:14.330-0:02:14.596	BL	0.0803704	8	0.301087		Trial 1	F5	UP	F	0:02:14.330-0:02:14.596	BL	0.198526	8	0.743726
Trial 1	F1	P	F	0:02:14.596-0:02:14.862	BL	0.0958626	8	0.359126		Trial 1	F5	UP	F	0:02:14.596-0:02:14.862	BL	0.296881	8	1.11219
Trial 1	F1	P	F	0:02:14.862-0:02:15.128	BL	0.0291549	8	0.109221		Trial 1	F5	UP	F	0:02:14.862-0:02:15.128	BL	0.286008	8	1.07146
Trial 1	F1	P	F	0:02:15.128-0:02:15.394	BL	0.0987173	8	0.369818		Trial 1	F5	UP	F	0:02:15.128-0:02:15.394	BL	0.462877	8	1.73405
Trial 1	F1	P	F	0:02:15.394-0:02:15.660	BL	0.0262169	8	0.0982153		Trial 1	F5	UP	F	0:02:15.394-0:02:15.660	BL	0.553356	8	2.07302
Trial 1	F1	P	F	0:02:15.660-0:02:15.926	BL	0.0501545	8	0.18789		Trial 1	F5	UP	F	0:02:15.660-0:02:15.926	BL	0.701988	8	2.62982
Trial 1	F1	P	F	0:02:15.926-0:02:16.192	BL	0.0937857	8	0.351347		Trial 1	F5	UP	F	0:02:15.926-0:02:16.192	BL	0.607627	8	2.27634
Trial 1	F1	P	F	0:02:16.192-0:02:16.458	BL	0.0879705	8	0.329558		Trial 1	F5	UP	F	0:02:16.192-0:02:16.458	BL	2.21242	8	8.28825
Trial 1	F1	P	F	0:02:16.458-0:02:16.724	BL	0.0907658	8	0.340033		Trial 1	F5	UP	F	0:02:16.458-0:02:16.724	BL	4.12994	8	15.4718
Trial 1	F1	P	F	0:02:16.724-0:02:16.990	BL	0.0949882	8	0.35585		Trial 1	F5	UP	F	0:02:16.724-0:02:16.990	BL	4.01451	8	15.0393
Trial 1	F1	P	F	0:02:16.990-0:02:17.256	BL	0.0630767	8	0.2363		Trial 1	F5	UP	F	0:02:16.990-0:02:17.256	BL	3.39883	8	12.7329
Trial 1	F1	P	F	0:02:17.256-0:02:17.522	BL	0.0696468	8	0.260916		Trial 1	F5	UP	F	0:02:17.256-0:02:17.522	BL	1.61687	8	6.05722
Trial 1	F1	P	F	0:02:17.522-0:02:17.788	BL	0.0987671	8	0.370004		Trial 1	F5	UP	F	0:02:17.522-0:02:17.788	BL	0.689027	8	2.58126
Trial 1	F1	P	F	0:02:17.788-0:02:18.054	BL	0.0583541	8	0.218609		Trial 1	F5	UP	F	0:02:17.788-0:02:18.054	BL	1.67457	8	6.27335
Trial 1	F1	P	F	0:02:18.054-0:02:18.320	BL	0.13779	8	0.516191		Trial 1	F5	UP	F	0:02:18.054-0:02:18.320	BL	1.96873	8	7.37536
Trial 1	F1	P	F	0:02:18.320-0:02:18.586	BL	0.0512988	8	0.192178		Trial 1	F5	UP	F	0:02:18.320-0:02:18.586	BL	0.411037	8	1.53985
Trial 1	F1	P	F	0:02:18.586-0:02:18.852	BL	0.119518	8	0.447746		Trial 1	F5	UP	F	0:02:18.586-0:02:18.852	BL	0.679351	8	2.54502
Trial 1	F1	P	F	0:02:18.852-0:02:19.118	BL	0.0559349	8	0.209546		Trial 1	F5	UP	F	0:02:18.852-0:02:19.118	BL	2.10887	8	7.90033
Trial 1	F1	P	F	0:02:19.118-0:02:19.384	BL	0.101845	8	0.381536		Trial 1	F5	UP	F	0:02:19.118-0:02:19.384	BL	0.261922	8	0.981225
Trial 1	F1	P	F	0:02:19.384-0:02:19.650	BL	0.0932432	8	0.349311		Trial 1	F5	UP	F	0:02:19.384-0:02:19.650	BL	0.51852	8	1.94251
Trial 1	F1	P	F	0:02:19.650-0:02:19.916	BL	0.0629826	8	0.235948		Trial 1	F5	UP	F	0:02:19.650-0:02:19.916	BL	0.292719	8	1.0966
Trial 1	F1	P	F	0:02:19.916-0:02:20.182	BL	0.0790839	8	0.296268		Trial 1	F5	UP	F	0:02:19.916-0:02:20.182	BL	0.234716	8	0.879306
Trial 1	F1	P	F	0:02:20.182-0:02:20.448	BL	0.075139	8	0.28149		Trial 1	F5	UP	F	0:02:20.182-0:02:20.448	BL	0.312299	8	1.16995
Trial 1	F1	P	F	0:02:20.448-0:02:20.714	BL	0.167496	8	0.627484		Trial 1	F5	UP	F	0:02:20.448-0:02:20.714	BL	0.373762	8	1.40021
Trial 1	F1	P	F	0:02:20.714-0:02:20.980	BL	0.110777	8	0.414995		Trial 1	F5	UP	F	0:02:20.714-0:02:20.980	BL	0.368093	8	1.37896
Trial 1	F1	P	F	0:02:20.980-0:02:21.246	BL	0.0951662	8	0.356515		Trial 1	F5	UP	F	0:02:20.980-0:02:21.246	BL	0.367933	8	1.37838
Trial 1	F1	P	F	0:02:21.246-0:02:21.512	BL	0.0611829	8	0.229207		Trial 1	F5	UP	F	0:02:21.246-0:02:21.512	BL	0.38688	8	1.44935
Trial 1	F1	P	F	0:02:21.512-0:02:21.778	BL	0.130431	8	0.488628		Trial 1	F5	UP	F	0:02:21.512-0:02:21.778	BL	0.134474	8	0.503769
Trial 1	F1	P	F	0:02:21.778-0:02:22.044	BL	0.135409	8	0.50728		Trial 1	F5	UP	F	0:02:21.778-0:02:22.044	BL	0.0846454	8	0.317102
Trial 1	F1	P	F	0:02:22.044-0:02:22.310	BL	0.0552119	8	0.206838		Trial 1	F5	UP	F	0:02:22.044-0:02:22.310	BL	0.03056	8	0.114485
Trial 1	F1	P	F	0:02:22.310-0:02:22.576	BL	0.0873841	8	0.327362		Trial 1	F5	UP	F	0:02:22.310-0:02:22.576	BL	0.0794967	8	0.297814
Trial 1	F1	P	F	0:02:22.576-0:02:22.842	BL	0.0119191	7	0.0510305		Trial 1	F5	UP	F	0:02:22.576-0:02:22.842	BL	0.0430546	7	0.184335
Trial 1	F1	P	F	0:02:22.842-0:02:23.108	BL	0.099167	8	0.371507		Trial 1	F5	UP	F	0:02:22.842-0:02:23.108	BL	0.129394	8	0.484751
Trial 1	F1	P	F	0:02:23.108-0:02:23.374	BL	0.0710166	8	0.266044		Trial 1	F5	UP	F	0:02:23.108-0:02:23.374	BL	0.0407608	8	0.1527
Trial 1	F1	P	F	0:02:23.374-0:02:23.640	BL	0.105238	8	0.394249		Trial 1	F5	UP	F	0:02:23.374-0:02:23.640	BL	0.064799	8	0.242756
Trial 1	F1	P	F	0:02:23.640-0:02:23.906	BL	0.0987066	8	0.36978		Trial 1	F5	UP	F	0:02:23.640-0:02:23.906	BL	0.0680174	8	0.25481
Trial 1	F1	P	F	0:02:23.906-0:02:24.172	BL	0.159722	8	0.598354		Trial 1	F5	UP	F	0:02:23.906-0:02:24.172	BL	0.0885891	8	0.331876
Trial 1	F1	P	F	0:02:24.172-0:02:24.438	BL	0.0918485	8	0.344089		Trial 1	F5	UP	F	0:02:24.172-0:02:24.438	BL	0.0581198	8	0.217732
Trial 1	F1	P	F	0:02:24.438-0:02:24.704	BL	0.0417979	8	0.156585		Trial 1	F5	UP	F	0:02:24.438-0:02:24.704	BL	0.0750978	8	0.281337
Trial 1	F1	P	F	0:02:24.704-0:02:24.970	BL	0.0951654	8	0.356514		Trial 1	F5	UP	F	0:02:24.704-0:02:24.970	BL	0.0862112	8	0.322968
Trial 1	F1	P	F	0:02:24.970-0:02:25.236	BL	0.101584	8	0.380559		Trial 1	F5	UP	F	0:02:24.970-0:02:25.236	BL	0.0204741	8	0.0767009
Trial 1	F1	P	F	0:02:25.236-0:02:25.502	BL	0.102358	8	0.383458		Trial 1	F5	UP	F	0:02:25.236-0:02:25.502	BL	0.0351155	8	0.131552
Trial 1	F1	P	F	0:02:25.502-0:02:25.768	BL	0.0759084	8	0.284373		Trial 1	F5	UP	F	0:02:25.502-0:02:25.768	BL	0.0290437	8	0.108806
Trial 1	F1	P	F	0:02:25.768-0:02:26.034	BL	0.126391	8	0.473494		Trial 1	F5	UP	F	0:02:25.768-0:02:26.034	BL	0.036383	8	0.1363
Trial 1	F1	P	F	0:02:26.034-0:02:26.300	BL	0.134166	8	0.502624		Trial 1	F5	UP	F	0:02:26.034-0:02:26.300	BL	0.0275193	8	0.103094
Trial 1	F1	P	F	0:02:26.300-0:02:26.566	BL	0.10499	8	0.393317		Trial 1	F5	UP	F	0:02:26.300-0:02:26.566	BL	0.0344714	8	0.129138
Trial 1	F1	P	F	0:02:26.566-0:02:26.832	BL	0.189981	8	0.711714		Trial 1	F5	UP	F	0:02:26.566-0:02:26.832	BL	0.0290983	8	0.109009
Trial 1	F1	P	F	0:02:26.832-0:02:27.098	BL	0.0827199	8	0.309891		Trial 1	F5	UP	F	0:02:26.832-0:02:27.098	BL	0.0288323	8	0.108013
Trial 1	F1	P	F	0:02:27.098-0:02:27.364	BL	0.048247	8	0.180744		Trial 1	F5	UP	F	0:02:27.098-0:02:27.364	BL	0.0475827	8	0.178256
Trial 1	F1	P	F	0:02:27.364-0:02:27.630	BL	0.0372387	8	0.139506		Trial 1	F5	UP	F	0:02:27.364-0:02:27.630	BL	0.0088281	8	0.0330724
Trial 1	F1	P	F	0:02:27.630-0:02:27.896	BL	0.0456916	8	0.171171		Trial 1	F5	UP	F	0:02:27.630-0:02:27.896	BL	0.224698	8	0.841776
Trial 1	F1	P	F	0:02:27.896-0:02:28.162	BL	0.0444355	8	0.166466		Trial 1	F5	UP	F	0:02:27.896-0:02:28.162	BL	6.64834	8	24.9063
Trial 1	F1	P	F	0:02:28.162-0:02:28.428	BL	0.112255	8	0.420535		Trial 1	F5	UP	F	0:02:28.162-0:02:28.428	BL	9.48374	8	35.5285
Trial 1	F1	P	F	0:02:28.428-0:02:28.694	BL	0.0350461	8	0.131291		Trial 1	F5	UP	F	0:02:28.428-0:02:28.694	BL	5.86559	8	21.9739
Trial 1	F1	P	F	0:02:28.694-0:02:28.960	BL	0.0876827	8	0.328487		Trial 1	F5	UP	F	0:02:28.694-0:02:28.960	BL	3.3494	8	12.5477
Trial 1	F1	P	F	0:02:28.960-0:02:29.226	BL	0.0923824	8	0.346087		Trial 1	F5	UP	F	0:02:28.960-0:02:29.226	BL	0.73914	8	2.76902
Trial 1	F1	P	F	0:02:29.226-0:02:29.492	BL	0.0328135	8	0.122928		Trial 1	F5	UP	F	0:02:29.226-0:02:29.492	BL	0.836925	8	3.13532
Trial 1	F1	P	F	0:02:29.492-0:02:29.758	BL	0.130777	8	0.489921		Trial 1	F5	UP	F	0:02:29.492-0:02:29.758	BL	1.50599	8	5.64184
Trial 1	F1	P	F	0:02:29.758-0:02:30.024	BL	0.0910188	8	0.34098		Trial 1	F5	UP	F	0:02:29.758-0:02:30.024	BL	0.447501	8	1.67645
Trial 1	F1	P	F	0:02:30.024-0:02:30.290	BL	0.0944082	8	0.353676		Trial 1	F5	UP	F	0:02:30.024-0:02:30.290	BL	0.686737	8	2.57269
Trial 1	F1	P	F	0:02:30.290-0:02:30.556	BL	0.0800845	8	0.300015		Trial 1	F5	UP	F	0:02:30.290-0:02:30.556	BL	0.470822	8	1.76381
Trial 1	F1	P	F	0:02:30.556-0:02:30.822	BL	0.0626295	8	0.234625		Trial 1	F5	UP	F	0:02:30.556-0:02:30.822	BL	0.777865	8	2.91409
Trial 1	F1	P	F	0:02:30.822-0:02:31.088	BL	0.0434814	8	0.162893		Trial 1	F5	UP	F	0:02:30.822-0:02:31.088	BL	0.574873	8	2.15362
Trial 1	F1	P	F	0:02:31.088-0:02:31.354	BL	0.0545877	8	0.204499		Trial 1	F5	UP	F	0:02:31.088-0:02:31.354	BL	0.238359	8	0.89295
Trial 1	F1	P	F	0:02:31.354-0:02:31.620	BL	0.0465392	8	0.174348		Trial 1	F5	UP	F	0:02:31.354-0:02:31.620	BL	0.333435	8	1.24913
Trial 1	F1	P	F	0:02:31.620-0:02:31.886	BL	0.0927541	8	0.347479		Trial 1	F5	UP	F	0:02:31.620-0:02:31.886	BL	0.202413	8	0.758287
Trial 1	F1	P	F	0:02:31.886-0:02:32.152	BL	0.115544	7	0.494697		Trial 1	F5	UP	F	0:02:31.886-0:02:32.152	BL	0.217597	7	0.931631
Trial 1	F1	P	F	0:02:32.152-0:02:32.418	BL	0.0698517	8	0.261683		Trial 1	F5	UP	F	0:02:32.152-0:02:32.418	BL	0.120269	8	0.450554
Trial 1	F1	P	F	0:02:32.418-0:02:32.684	BL	0.113566	8	0.425448		Trial 1	F5	UP	F	0:02:32.418-0:02:32.684	BL	0.140257	8	0.525439
Trial 1	F1	P	F	0:02:32.684-0:02:32.950	BL	0.0660539	8	0.247454		Trial 1	F5	UP	F	0:02:32.684-0:02:32.950	BL	0.106841	8	0.400253
Trial 1	F1	P	F	0:02:32.950-0:02:33.216	BL	0.090901	8	0.340538		Trial 1	F5	UP	F	0:02:32.950-0:02:33.216	BL	0.193039	8	0.723177
Trial 1	F1	P	F	0:02:33.216-0:02:33.482	BL	0.146533	8	0.54895		Trial 1	F5	UP	F	0:02:33.216-0:02:33.482	BL	0.0613064	8	0.229668
Trial 1	F1	P	F	0:02:33.482-0:02:33.748	BL	0.111914	8	0.419257		Trial 1	F5	UP	F	0:02:33.482-0:02:33.748	BL	0.0483994	8	0.181317
Trial 1	F1	P	F	0:02:33.748-0:02:34.014	BL	0.094958	8	0.355735		Trial 1	F5	UP	F	0:02:33.748-0:02:34.014	BL	0.100809	8	0.377652
Trial 1	F1	P	F	0:02:34.014-0:02:34.280	BL	0.0425701	8	0.159478		Trial 1	F5	UP	F	0:02:34.014-0:02:34.280	BL	0.106887	8	0.40043
Trial 1	F1	P	F	0:02:34.280-0:02:34.546	BL	0.074412	8	0.278765		Trial 1	F5	UP	F	0:02:34.280-0:02:34.546	BL	0.172889	8	0.647686
Trial 1	F1	P	F	0:02:34.546-0:02:34.812	BL	0.0872155	8	0.326729		Trial 1	F5	UP	F	0:02:34.546-0:02:34.812	BL	0.136797	8	0.512473
Trial 1	F1	P	F	0:02:34.812-0:02:35.078	BL	0.0574519	8	0.215231		Trial 1	F5	UP	F	0:02:34.812-0:02:35.078	BL	0.0713388	8	0.267255
Trial 1	F1	P	F	0:02:35.078-0:02:35.344	BL	0.063533	8	0.238009		Trial 1	F5	UP	F	0:02:35.078-0:02:35.344	BL	0.062567	8	0.234393
Trial 1	F1	P	F	0:02:35.344-0:02:35.610	BL	0.0496171	8	0.185877		Trial 1	F5	UP	F	0:02:35.344-0:02:35.610	BL	0.153202	8	0.57393
Trial 1	F1	P	F	0:02:35.610-0:02:35.876	BL	0.0601265	8	0.225248		Trial 1	F5	UP	F	0:02:35.610-0:02:35.876	BL	0.0739667	8	0.277097
Trial 1	F1	P	F	0:02:35.876-0:02:36.142	BL	0.0484569	8	0.181532		Trial 1	F5	UP	F	0:02:35.876-0:02:36.142	BL	0.044446	8	0.166506
Trial 1	F1	P	F	0:02:36.142-0:02:36.408	BL	0.0685699	8	0.256882		Trial 1	F5	UP	F	0:02:36.142-0:02:36.408	BL	0.0901998	8	0.33791
Trial 1	F1	P	F	0:02:36.408-0:02:36.674	BL	0.0247167	8	0.0925947		Trial 1	F5	UP	F	0:02:36.408-0:02:36.674	BL	0.0351135	8	0.131543
Trial 1	F1	P	F	0:02:36.674-0:02:36.940	BL	0.102245	8	0.383034		Trial 1	F5	UP	F	0:02:36.674-0:02:36.940	BL	0.0752486	8	0.281898
Trial 1	F1	P	F	0:02:36.940-0:02:37.206	BL	0.0380724	8	0.142629		Trial 1	F5	UP	F	0:02:36.940-0:02:37.206	BL	0.0519944	8	0.194785
Trial 1	F1	P	F	0:02:37.206-0:02:37.472	BL	0.0588178	8	0.220345		Trial 1	F5	UP	F	0:02:37.206-0:02:37.472	BL	0.0892131	8	0.334213
Trial 1	F1	P	F	0:02:37.472-0:02:37.738	BL	0.0336686	8	0.126131		Trial 1	F5	UP	F	0:02:37.472-0:02:37.738	BL	0.0322269	8	0.12073
Trial 1	F1	P	F	0:02:37.738-0:02:38.004	BL	0.0463172	8	0.173515		Trial 1	F5	UP	F	0:02:37.738-0:02:38.004	BL	0.0947302	8	0.354885
Trial 1	F1	P	F	0:02:38.004-0:02:38.270	BL	0.087142	8	0.326455		Trial 1	F5	UP	F	0:02:38.004-0:02:38.270	BL	0.160372	8	0.600792
Trial 1	F1	P	F	0:02:38.270-0:02:38.536	BL	0.0478538	8	0.179272		Trial 1	F5	UP	F	0:02:38.270-0:02:38.536	BL	0.0746264	8	0.279569
Trial 1	F1	P	F	0:02:38.536-0:02:38.802	BL	0.0387999	8	0.145354		Trial 1	F5	UP	F	0:02:38.536-0:02:38.802	BL	0.126227	8	0.472874
Trial 1	F1	P	F	0:02:38.802-0:02:39.068	BL	0.0376649	8	0.141103		Trial 1	F5	UP	F	0:02:38.802-0:02:39.068	BL	0.0288696	8	0.108153
Trial 1	F1	P	F	0:02:39.068-0:02:39.334	BL	0.104746	8	0.392406		Trial 1	F5	UP	F	0:02:39.068-0:02:39.334	BL	0.138144	8	0.517521
Trial 1	F1	P	F	0:02:39.334-0:02:39.600	BL	0.0258268	8	0.0967535		Trial 1	F5	UP	F	0:02:39.334-0:02:39.600	BL	0.276959	8	1.03755
Trial 1	F1	P	F	0:02:39.600-0:02:39.866	BL	0.101597	8	0.380607		Trial 1	F5	UP	F	0:02:39.600-0:02:39.866	BL	0.807595	8	3.02546
Trial 1	F1	P	F	0:02:39.866-0:02:40.132	BL	0.0663929	8	0.248724		Trial 1	F5	UP	F	0:02:39.866-0:02:40.132	BL	0.595034	8	2.22915
Trial 1	F1	P	F	0:02:40.132-0:02:40.398	BL	0.1037	8	0.388486		Trial 1	F5	UP	F	0:02:40.132-0:02:40.398	BL	0.472252	8	1.76918
Trial 1	F1	P	F	0:02:40.398-0:02:40.664	BL	0.0710873	8	0.26631		Trial 1	F5	UP	F	0:02:40.398-0:02:40.664	BL	0.261139	8	0.978289
Trial 1	F1	P	F	0:02:40.664-0:02:40.930	BL	0.0503287	8	0.188545		Trial 1	F5	UP	F	0:02:40.664-0:02:40.930	BL	0.20123	8	0.75386
Trial 1	F1	P	F	0:02:40.930-0:02:41.196	BL	0.0769069	8	0.288113		Trial 1	F5	UP	F	0:02:40.930-0:02:41.196	BL	0.102951	8	0.385683
Trial 1	F1	P	F	0:02:41.196-0:02:41.462	BL	0.0877795	8	0.328844		Trial 1	F5	UP	F	0:02:41.196-0:02:41.462	BL	0.19475	8	0.729579
Trial 1	F1	P	F	0:02:41.462-0:02:41.728	BL	0.103383	7	0.442627		Trial 1	F5	UP	F	0:02:41.462-0:02:41.728	BL	0.150954	7	0.646297
Trial 1	F1	P	F	0:02:41.728-0:02:41.994	BL	0.0815957	8	0.305677		Trial 1	F5	UP	F	0:02:41.728-0:02:41.994	BL	0.330174	8	1.23692
Trial 1	F1	P	F	0:02:41.994-0:02:42.260	BL	0.122363	8	0.458404		Trial 1	F5	UP	F	0:02:41.994-0:02:42.260	BL	0.270251	8	1.01243
Trial 1	F1	P	F	0:02:42.260-0:02:42.526	BL	0.0430356	8	0.161222		Trial 1	F5	UP	F	0:02:42.260-0:02:42.526	BL	0.0756075	8	0.283243
Trial 1	F1	P	F	0:02:42.526-0:02:42.792	BL	0.0986486	8	0.369563		Trial 1	F5	UP	F	0:02:42.526-0:02:42.792	BL	0.173796	8	0.651089
Trial 1	F1	P	F	0:02:42.792-0:02:43.058	BL	0.0630277	8	0.236117		Trial 1	F5	UP	F	0:02:42.792-0:02:43.058	BL	0.108687	8	0.40717
Trial 1	F1	P	F	0:02:43.058-0:02:43.324	BL	0.0621637	8	0.23288		Trial 1	F5	UP	F	0:02:43.058-0:02:43.324	BL	0.0559155	8	0.209475
Trial 1	F1	P	F	0:02:43.324-0:02:43.590	BL	0.100386	8	0.376071		Trial 1	F5	UP	F	0:02:43.324-0:02:43.590	BL	0.148461	8	0.556167
Trial 1	F1	P	F	0:02:43.590-0:02:43.856	BL	0.0441788	8	0.165504		Trial 1	F5	UP	F	0:02:43.590-0:02:43.856	BL	0.0319426	8	0.119665
Trial 1	F1	P	F	0:02:43.856-0:02:44.122	BL	0.151394	8	0.567167		Trial 1	F5	UP	F	0:02:43.856-0:02:44.122	BL	0.169667	8	0.635616
Trial 1	F1	P	F	0:02:44.122-0:02:44.388	BL	0.0721342	8	0.270231		Trial 1	F5	UP	F	0:02:44.122-0:02:44.388	BL	0.0379792	8	0.142279
Trial 1	F1	P	F	0:02:44.388-0:02:44.654	BL	0.120423	8	0.451137		Trial 1	F5	UP	F	0:02:44.388-0:02:44.654	BL	0.0648142	8	0.242811
Trial 1	F1	P	F	0:02:44.654-0:02:44.920	BL	0.160218	8	0.600214		Trial 1	F5	UP	F	0:02:44.654-0:02:44.920	BL	0.0957465	8	0.358688
Trial 1	F1	P	F	0:02:44.920-0:02:45.186	BL	0.175469	8	0.65735		Trial 1	F5	UP	F	0:02:44.920-0:02:45.186	BL	0.0402429	8	0.150761
Trial 1	F1	P	F	0:02:45.186-0:02:45.452	BL	0.173866	8	0.651344		Trial 1	F5	UP	F	0:02:45.186-0:02:45.452	BL	0.0621952	8	0.232997
Trial 1	F1	P	F	0:02:45.452-0:02:45.718	BL	0.206153	8	0.772298		Trial 1	F5	UP	F	0:02:45.452-0:02:45.718	BL	0.0874804	8	0.327725
Trial 1	F1	P	F	0:02:45.718-0:02:45.984	BL	0.221945	8	0.831461		Trial 1	F5	UP	F	0:02:45.718-0:02:45.984	BL	0.191575	8	0.717684
Trial 1	F1	P	F	0:02:45.984-0:02:46.250	BL	0.302102	8	1.13175		Trial 1	F5	UP	F	0:02:45.984-0:02:46.250	BL	0.026186	8	0.0980988
Trial 1	F1	P	F	0:02:46.250-0:02:46.516	BL	0.331525	8	1.24197		Trial 1	F5	UP	F	0:02:46.250-0:02:46.516	BL	0.145617	8	0.545515
Trial 1	F1	P	F	0:02:46.516-0:02:46.782	BL	0.287307	8	1.07632		Trial 1	F5	UP	F	0:02:46.516-0:02:46.782	BL	0.0713444	8	0.267275
Trial 1	F1	P	F	0:02:46.782-0:02:47.048	BL	0.225834	8	0.84603		Trial 1	F5	UP	F	0:02:46.782-0:02:47.048	BL	0.0862283	8	0.323035
Trial 1	F1	P	F	0:02:47.048-0:02:47.314	BL	0.0644683	8	0.241515		Trial 1	F5	UP	F	0:02:47.048-0:02:47.314	BL	0.144133	8	0.539963
Trial 1	F1	P	F	0:02:47.314-0:02:47.580	BL	0.0478677	8	0.179324		Trial 1	F5	UP	F	0:02:47.314-0:02:47.580	BL	0.15453	8	0.578906
Trial 1	F1	P	F	0:02:47.580-0:02:47.846	BL	0.151839	8	0.568827		Trial 1	F5	UP	F	0:02:47.580-0:02:47.846	BL	0.0920585	8	0.344876
Trial 1	F1	P	F	0:02:47.846-0:02:48.112	BL	0.0701056	8	0.262634		Trial 1	F5	UP	F	0:02:47.846-0:02:48.112	BL	0.0597669	8	0.223901
Trial 1	F1	P	F	0:02:48.112-0:02:48.378	BL	0.0604203	8	0.226349		Trial 1	F5	UP	F	0:02:48.112-0:02:48.378	BL	0.152351	8	0.570744
Trial 1	F1	P	F	0:02:48.378-0:02:48.644	BL	0.105602	8	0.39561		Trial 1	F5	UP	F	0:02:48.378-0:02:48.644	BL	0.0355051	8	0.133012
Trial 1	F1	P	F	0:02:48.644-0:02:48.910	BL	0.112806	8	0.422598		Trial 1	F5	UP	F	0:02:48.644-0:02:48.910	BL	0.0901148	8	0.337592
Trial 1	F1	P	F	0:02:48.910-0:02:49.176	BL	0.103992	8	0.389581		Trial 1	F5	UP	F	0:02:48.910-0:02:49.176	BL	0.147127	8	0.551176
Trial 1	F1	P	F	0:02:49.176-0:02:49.442	BL	0.11829	8	0.443149		Trial 1	F5	UP	F	0:02:49.176-0:02:49.442	BL	0.0961916	8	0.360357
Trial 1	F1	P	F	0:02:49.442-0:02:49.708	BL	0.0960755	8	0.359925		Trial 1	F5	UP	F	0:02:49.442-0:02:49.708	BL	0.108478	8	0.406385
Trial 1	F1	P	F	0:02:49.708-0:02:49.974	BL	0.0437434	8	0.163875		Trial 1	F5	UP	F	0:02:49.708-0:02:49.974	BL	0.156712	8	0.587083
Trial 1	F1	P	F	0:02:49.974-0:02:50.240	BL	0.0936373	8	0.350788		Trial 1	F5	UP	F	0:02:49.974-0:02:50.240	BL	0.152279	8	0.570472
Trial 1	F1	P	F	0:02:50.240-0:02:50.506	BL	0.0499658	8	0.187185		Trial 1	F5	UP	F	0:02:50.240-0:02:50.506	BL	0.13525	8	0.506678
Trial 1	F1	P	F	0:02:50.506-0:02:50.772	BL	0.222133	8	0.832167		Trial 1	F5	UP	F	0:02:50.506-0:02:50.772	BL	0.111736	8	0.418592
Trial 1	F1	P	F	0:02:50.772-0:02:51.038	BL	0.0862809	8	0.323229		Trial 1	F5	UP	F	0:02:50.772-0:02:51.038	BL	0.0782789	8	0.29325
Trial 1	F1	P	F	0:02:51.038-0:02:51.304	BL	0.113447	7	0.485713		Trial 1	F5	UP	F	0:02:51.038-0:02:51.304	BL	0.0825144	7	0.353278
Trial 1	F1	P	F	0:02:51.304-0:02:51.570	BL	0.0503772	8	0.188726		Trial 1	F5	UP	F	0:02:51.304-0:02:51.570	BL	0.0732363	8	0.274362
Trial 1	F1	P	F	0:02:51.570-0:02:51.836	BL	0.0540779	8	0.202588		Trial 1	F5	UP	F	0:02:51.570-0:02:51.836	BL	0.0638576	8	0.239229
Trial 1	F1	P	F	0:02:51.836-0:02:52.102	BL	0.0888002	8	0.33267		Trial 1	F5	UP	F	0:02:51.836-0:02:52.102	BL	0.100044	8	0.374792
Trial 1	F1	P	F	0:02:52.102-0:02:52.368	BL	0.0414453	8	0.155264		Trial 1	F5	UP	F	0:02:52.102-0:02:52.368	BL	0.0753334	8	0.282217
Trial 1	F1	P	F	0:02:52.368-0:02:52.634	BL	0.110582	8	0.414268		Trial 1	F5	UP	F	0:02:52.368-0:02:52.634	BL	0.166429	8	0.623481
Trial 1	F1	P	F	0:02:52.634-0:02:52.900	BL	0.0396213	8	0.148432		Trial 1	F5	UP	F	0:02:52.634-0:02:52.900	BL	0.0270697	8	0.10141
Trial 1	F1	P	F	0:02:52.900-0:02:53.166	BL	0.0873797	8	0.327347		Trial 1	F5	UP	F	0:02:52.900-0:02:53.166	BL	0.280873	8	1.05222
Trial 1	F1	P	F	0:02:53.166-0:02:53.432	BL	0.0296072	8	0.110917		Trial 1	F5	UP	F	0:02:53.166-0:02:53.432	BL	0.36701	8	1.37491
Trial 1	F1	P	F	0:02:53.432-0:02:53.698	BL	0.0608474	8	0.227949		Trial 1	F5	UP	F	0:02:53.432-0:02:53.698	BL	0.211335	8	0.791717
Trial 1	F1	P	F	0:02:53.698-0:02:53.964	BL	0.0911588	8	0.341504		Trial 1	F5	UP	F	0:02:53.698-0:02:53.964	BL	0.270543	8	1.01352
Trial 1	F1	P	F	0:02:53.964-0:02:54.230	BL	0.0803977	8	0.30119		Trial 1	F5	UP	F	0:02:53.964-0:02:54.230	BL	0.30576	8	1.14546
Trial 1	F1	P	F	0:02:54.230-0:02:54.496	BL	0.0360504	8	0.135053		Trial 1	F5	UP	F	0:02:54.230-0:02:54.496	BL	0.140273	8	0.525494
Trial 1	F1	P	F	0:02:54.496-0:02:54.762	BL	0.0336634	8	0.126111		Trial 1	F5	UP	F	0:02:54.496-0:02:54.762	BL	0.0906839	8	0.339725
Trial 1	F1	P	F	0:02:54.762-0:02:55.028	BL	0.127768	8	0.47865		Trial 1	F5	UP	F	0:02:54.762-0:02:55.028	BL	0.302931	8	1.13485
Trial 1	F1	P	F	0:02:55.028-0:02:55.294	BL	0.0741483	8	0.277779		Trial 1	F5	UP	F	0:02:55.028-0:02:55.294	BL	0.157062	8	0.588389
Trial 1	F1	P	F	0:02:55.294-0:02:55.560	BL	0.118657	8	0.44452		Trial 1	F5	UP	F	0:02:55.294-0:02:55.560	BL	0.136002	8	0.509497
Trial 1	F1	P	F	0:02:55.560-0:02:55.826	BL	0.10352	8	0.387811		Trial 1	F5	UP	F	0:02:55.560-0:02:55.826	BL	0.178673	8	0.66935
Trial 1	F1	P	F	0:02:55.826-0:02:56.092	BL	0.135214	8	0.506547		Trial 1	F5	UP	F	0:02:55.826-0:02:56.092	BL	0.119938	8	0.44932
Trial 1	F1	P	F	0:02:56.092-0:02:56.358	BL	0.0963945	8	0.361116		Trial 1	F5	UP	F	0:02:56.092-0:02:56.358	BL	0.197897	8	0.741374
Trial 1	F1	P	F	0:02:56.358-0:02:56.624	BL	0.101445	8	0.380037		Trial 1	F5	UP	F	0:02:56.358-0:02:56.624	BL	0.0807473	8	0.302498
Trial 1	F1	P	F	0:02:56.624-0:02:56.890	BL	0.203622	8	0.762816		Trial 1	F5	UP	F	0:02:56.624-0:02:56.890	BL	0.0645976	8	0.242
Trial 1	F1	P	F	0:02:56.890-0:02:57.156	BL	0.13617	8	0.510132		Trial 1	F5	UP	F	0:02:56.890-0:02:57.156	BL	0.0147862	8	0.055393
Trial 1	F1	P	F	0:02:57.156-0:02:57.422	BL	0.0624736	8	0.234041		Trial 1	F5	UP	F	0:02:57.156-0:02:57.422	BL	0.10648	8	0.3989
Trial 1	F1	P	F	0:02:57.422-0:02:57.688	BL	0.0343246	8	0.128588		Trial 1	F5	UP	F	0:02:57.422-0:02:57.688	BL	0.0201986	8	0.0756691
Trial 1	F1	P	F	0:02:57.688-0:02:57.954	BL	0.103445	8	0.387531		Trial 1	F5	UP	F	0:02:57.688-0:02:57.954	BL	0.0703258	8	0.263456
Trial 1	F1	P	F	0:02:57.954-0:02:58.220	BL	0.0311995	8	0.116882		Trial 1	F5	UP	F	0:02:57.954-0:02:58.220	BL	0.0199519	8	0.0747448
Trial 1	F1	P	F	0:02:58.220-0:02:58.486	BL	0.0524338	8	0.196429		Trial 1	F5	UP	F	0:02:58.220-0:02:58.486	BL	0.0480289	8	0.179928
Trial 1	F1	P	F	0:02:58.486-0:02:58.752	BL	0.0226623	8	0.0848989		Trial 1	F5	UP	F	0:02:58.486-0:02:58.752	BL	0.0173921	8	0.0651554
Trial 1	F1	P	F	0:02:58.752-0:02:59.018	BL	0.0358903	8	0.134454		Trial 1	F5	UP	F	0:02:58.752-0:02:59.018	BL	0.037256	8	0.139571
Trial 1	F1	P	F	0:02:59.018-0:02:59.284	BL	0.041484	8	0.155408		Trial 1	F5	UP	F	0:02:59.018-0:02:59.284	BL	0.0482354	8	0.180702
Trial 1	F1	P	F	0:02:59.284-0:02:59.550	BL	0.0477239	8	0.178786		Trial 1	F5	UP	F	0:02:59.284-0:02:59.550	BL	0.0108537	8	0.0406607
Trial 1	F1	P	F	0:02:59.550-0:02:59.816	BL	0.108673	8	0.407115		Trial 1	F5	UP	F	0:02:59.550-0:02:59.816	BL	0.078521	8	0.29416
Trial 1	F1	P	F	0:02:59.816-0:03:00.082	BL	0.0841141	8	0.315113		Trial 1	F5	UP	F	0:02:59.816-0:03:00.082	BL	0.0359949	8	0.134846
Trial 1	F1	P	F	0:03:00.082-0:03:00.348	CS1a	0.167479	8	0.627419		Trial 1	F5	UP	F	0:03:00.082-0:03:00.348	CS1a	0.771385	8	2.88979
Trial 1	F1	P	F	0:03:00.348-0:03:00.614	CS1a	0.165544	8	0.620168		Trial 1	F5	UP	F	0:03:00.348-0:03:00.614	CS1a	6.71474	8	25.155
Trial 1	F1	P	F	0:03:00.614-0:03:00.880	CS1a	0.12733	7	0.545154		Trial 1	F5	UP	F	0:03:00.614-0:03:00.880	CS1a	7.64584	7	32.7351
Trial 1	F1	P	F	0:03:00.880-0:03:01.146	CS1a	0.271824	8	1.01832		Trial 1	F5	UP	F	0:03:00.880-0:03:01.146	CS1a	5.65178	8	21.1731
Trial 1	F1	P	F	0:03:01.146-0:03:01.412	CS1a	4.64262	8	17.3923		Trial 1	F5	UP	F	0:03:01.146-0:03:01.412	CS1a	3.8067	8	14.2608
Trial 1	F1	P	F	0:03:01.412-0:03:01.678	CS1a	2.22875	8	8.34948		Trial 1	F5	UP	F	0:03:01.412-0:03:01.678	CS1a	2.37683	8	8.90424
Trial 1	F1	P	F	0:03:01.678-0:03:01.944	CS1a	4.24055	8	15.8861		Trial 1	F5	UP	F	0:03:01.678-0:03:01.944	CS1a	1.12586	8	4.21772
Trial 1	F1	P	F	0:03:01.944-0:03:02.210	CS1a	0.88952	8	3.33238		Trial 1	F5	UP	F	0:03:01.944-0:03:02.210	CS1a	0.27752	8	1.03966
Trial 1	F1	P	F	0:03:02.210-0:03:02.476	CS1a	0.151521	8	0.567638		Trial 1	F5	UP	F	0:03:02.210-0:03:02.476	CS1a	0.153948	8	0.576734
Trial 1	F1	P	F	0:03:02.476-0:03:02.742	CS1a	0.151521	8	0.567636		Trial 1	F5	UP	F	0:03:02.476-0:03:02.742	CS1a	0.114453	8	0.42877
Trial 1	F1	P	F	0:03:02.742-0:03:03.008	CS1a	0.151521	8	0.567638		Trial 1	F5	UP	F	0:03:02.742-0:03:03.008	CS1a	0.125013	8	0.468333
Trial 1	F1	P	F	0:03:03.008-0:03:03.274	CS1a	0.151521	8	0.567636		Trial 1	F5	UP	F	0:03:03.008-0:03:03.274	CS1a	0.302503	8	1.13325
Trial 1	F1	P	F	0:03:03.274-0:03:03.540	CS1a	0.151521	8	0.567636		Trial 1	F5	UP	F	0:03:03.274-0:03:03.540	CS1a	0.453891	8	1.70039
Trial 1	F1	P	F	0:03:03.540-0:03:03.806	CS1a	0.151521	8	0.567638		Trial 1	F5	UP	F	0:03:03.540-0:03:03.806	CS1a	0.441622	8	1.65443
Trial 1	F1	P	F	0:03:03.806-0:03:04.072	CS1a	0.151521	8	0.567636		Trial 1	F5	UP	F	0:03:03.806-0:03:04.072	CS1a	0.922748	8	3.45684
Trial 1	F1	P	F	0:03:04.072-0:03:04.338	CS1a	0.151521	8	0.567638		Trial 1	F5	UP	F	0:03:04.072-0:03:04.338	CS1a	0.236178	8	0.884778
Trial 1	F1	P	F	0:03:04.338-0:03:04.604	CS1a	0.151521	8	0.567636		Trial 1	F5	UP	F	0:03:04.338-0:03:04.604	CS1a	0.259103	8	0.970661
Trial 1	F1	P	F	0:03:04.604-0:03:04.870	CS1a	0.151521	8	0.567636		Trial 1	F5	UP	F	0:03:04.604-0:03:04.870	CS1a	0.124994	8	0.468258
Trial 1	F1	P	F	0:03:04.870-0:03:05.136	CS1a	0.151521	8	0.567638		Trial 1	F5	UP	F	0:03:04.870-0:03:05.136	CS1a	0.233881	8	0.876183
Trial 1	F1	P	F	0:03:05.136-0:03:05.402	CS1a	0.151521	8	0.567636		Trial 1	F5	UP	F	0:03:05.136-0:03:05.402	CS1a	0.122465	8	0.458784
Trial 1	F1	P	F	0:03:05.402-0:03:05.668	CS1a	0.151521	8	0.567638		Trial 1	F5	UP	F	0:03:05.402-0:03:05.668	CS1a	0.0935639	8	0.350514
Trial 1	F1	P	F	0:03:05.668-0:03:05.934	CS1a	0.151521	8	0.567636		Trial 1	F5	UP	F	0:03:05.668-0:03:05.934	CS1a	0.0492885	8	0.184647
Trial 1	F1	P	F	0:03:05.934-0:03:06.200	CS1a	0.151521	8	0.567636		Trial 1	F5	UP	F	0:03:05.934-0:03:06.200	CS1a	0.0602615	8	0.225754
Trial 1	F1	P	F	0:03:06.200-0:03:06.466	CS1a	0.151521	8	0.567638		Trial 1	F5	UP	F	0:03:06.200-0:03:06.466	CS1a	0.0907219	8	0.339867
Trial 1	F1	P	F	0:03:06.466-0:03:06.732	CS1a	0.151521	8	0.567636		Trial 1	F5	UP	F	0:03:06.466-0:03:06.732	CS1a	0.0937593	8	0.351244
Trial 1	F1	P	F	0:03:06.732-0:03:06.998	CS1a	0.151521	8	0.567638		Trial 1	F5	UP	F	0:03:06.732-0:03:06.998	CS1a	0.180137	8	0.674837
Trial 1	F1	P	F	0:03:06.998-0:03:07.264	CS1a	1.72059	8	6.44574		Trial 1	F5	UP	F	0:03:06.998-0:03:07.264	CS1a	0.0684719	8	0.256512
Trial 1	F1	P	F	0:03:07.264-0:03:07.530	CS1a	1.58604	8	5.94168		Trial 1	F5	UP	F	0:03:07.264-0:03:07.530	CS1a	0.083122	8	0.311395
Trial 1	F1	P	F	0:03:07.530-0:03:07.796	CS1a	1.00509	8	3.76533		Trial 1	F5	UP	F	0:03:07.530-0:03:07.796	CS1a	0.0178905	8	0.0670225
Trial 1	F1	P	F	0:03:07.796-0:03:08.062	CS1a	3.99511	8	14.9666		Trial 1	F5	UP	F	0:03:07.796-0:03:08.062	CS1a	0.0770261	8	0.288559
Trial 1	F1	P	F	0:03:08.062-0:03:08.328	CS1a	7.08177	8	26.5302		Trial 1	F5	UP	F	0:03:08.062-0:03:08.328	CS1a	0.0601598	8	0.225374
Trial 1	F1	P	F	0:03:08.328-0:03:08.594	CS1a	5.48512	8	20.5486		Trial 1	F5	UP	F	0:03:08.328-0:03:08.594	CS1a	0.0720771	8	0.270019
Trial 1	F1	P	F	0:03:08.594-0:03:08.860	CS1a	2.94529	8	11.0338		Trial 1	F5	UP	F	0:03:08.594-0:03:08.860	CS1a	0.151435	8	0.567312
Trial 1	F1	P	F	0:03:08.860-0:03:09.126	CS1a	1.26969	8	4.75658		Trial 1	F5	UP	F	0:03:08.860-0:03:09.126	CS1a	0.0686707	8	0.257261
Trial 1	F1	P	F	0:03:09.126-0:03:09.392	CS1a	0.269892	8	1.01108		Trial 1	F5	UP	F	0:03:09.126-0:03:09.392	CS1a	0.110799	8	0.415081
Trial 1	F1	P	F	0:03:09.392-0:03:09.658	CS1a	0.346785	8	1.29914		Trial 1	F5	UP	F	0:03:09.392-0:03:09.658	CS1a	0.0487766	8	0.182729
Trial 1	F1	P	F	0:03:09.658-0:03:09.924	CS1a	0.209801	8	0.785967		Trial 1	F5	UP	F	0:03:09.658-0:03:09.924	CS1a	0.0905929	8	0.339382
Trial 1	F1	P	F	0:03:09.924-0:03:10.190	CS1a	0.0811557	7	0.347464		Trial 1	F5	UP	F	0:03:09.924-0:03:10.190	CS1a	0.0314635	7	0.134709
Trial 1	F1	P	F	0:03:10.190-0:03:10.456	IT1	6.65731	8	24.94		Trial 1	F5	UP	F	0:03:10.190-0:03:10.456	IT1	0.148396	8	0.555928
Trial 1	F1	P	F	0:03:10.456-0:03:10.722	IT1	7.48807	8	28.0521		Trial 1	F5	UP	F	0:03:10.456-0:03:10.722	IT1	0.142459	8	0.533685
Trial 1	F1	P	F	0:03:10.722-0:03:10.988	IT1	4.65858	8	17.4522		Trial 1	F5	UP	F	0:03:10.722-0:03:10.988	IT1	0.0312853	8	0.117203
Trial 1	F1	P	F	0:03:10.988-0:03:11.254	IT1	1.85549	8	6.95119		Trial 1	F5	UP	F	0:03:10.988-0:03:11.254	IT1	0.157663	8	0.590645
Trial 1	F1	P	F	0:03:11.254-0:03:11.520	IT1	2.25451	8	8.44595		Trial 1	F5	UP	F	0:03:11.254-0:03:11.520	IT1	0.0580236	8	0.21737
Trial 1	F1	P	F	0:03:11.520-0:03:11.786	IT1	0.777274	8	2.91187		Trial 1	F5	UP	F	0:03:11.520-0:03:11.786	IT1	0.119582	8	0.447982
Trial 1	F1	P	F	0:03:11.786-0:03:12.052	IT1	0.263413	8	0.986812		Trial 1	F5	UP	F	0:03:11.786-0:03:12.052	IT1	0.0315844	8	0.118323
Trial 1	F1	P	F	0:03:12.052-0:03:12.318	IT1	0.125565	8	0.470395		Trial 1	F5	UP	F	0:03:12.052-0:03:12.318	IT1	0.0963349	8	0.360892
Trial 1	F1	P	F	0:03:12.318-0:03:12.584	IT1	0.0478395	8	0.17922		Trial 1	F5	UP	F	0:03:12.318-0:03:12.584	IT1	0.0745858	8	0.279417
Trial 1	F1	P	F	0:03:12.584-0:03:12.850	IT1	0.167724	8	0.628339		Trial 1	F5	UP	F	0:03:12.584-0:03:12.850	IT1	0.0705229	8	0.264196
Trial 1	F1	P	F	0:03:12.850-0:03:13.116	IT1	0.291819	8	1.09323		Trial 1	F5	UP	F	0:03:12.850-0:03:13.116	IT1	0.0943398	8	0.35342
Trial 1	F1	P	F	0:03:13.116-0:03:13.382	IT1	0.312159	8	1.16942		Trial 1	F5	UP	F	0:03:13.116-0:03:13.382	IT1	0.0265117	8	0.0993192
Trial 1	F1	P	F	0:03:13.382-0:03:13.648	IT1	0.126962	8	0.47563		Trial 1	F5	UP	F	0:03:13.382-0:03:13.648	IT1	0.130402	8	0.488515
Trial 1	F1	P	F	0:03:13.648-0:03:13.914	IT1	0.101207	8	0.379147		Trial 1	F5	UP	F	0:03:13.648-0:03:13.914	IT1	0.103302	8	0.386994
Trial 1	F1	P	F	0:03:13.914-0:03:14.180	IT1	0.36756	8	1.37697		Trial 1	F5	UP	F	0:03:13.914-0:03:14.180	IT1	0.147263	8	0.551689
Trial 1	F1	P	F	0:03:14.180-0:03:14.446	IT1	0.273793	8	1.0257		Trial 1	F5	UP	F	0:03:14.180-0:03:14.446	IT1	0.0505819	8	0.189493
Trial 1	F1	P	F	0:03:14.446-0:03:14.712	IT1	0.452946	8	1.69686		Trial 1	F5	UP	F	0:03:14.446-0:03:14.712	IT1	0.141282	8	0.529279
Trial 1	F1	P	F	0:03:14.712-0:03:14.978	IT1	0.201526	8	0.754971		Trial 1	F5	UP	F	0:03:14.712-0:03:14.978	IT1	0.0840824	8	0.314993
Trial 1	F1	P	F	0:03:14.978-0:03:15.244	IT1	0.174162	8	0.652458		Trial 1	F5	UP	F	0:03:14.978-0:03:15.244	IT1	0.0795499	8	0.298014
Trial 1	F1	P	F	0:03:15.244-0:03:15.510	IT1	0.442465	8	1.65758		Trial 1	F5	UP	F	0:03:15.244-0:03:15.510	IT1	0.064018	8	0.239826
Trial 1	F1	P	F	0:03:15.510-0:03:15.776	IT1	0.337036	8	1.26263		Trial 1	F5	UP	F	0:03:15.510-0:03:15.776	IT1	0.0571258	8	0.214008
Trial 1	F1	P	F	0:03:15.776-0:03:16.042	IT1	0.652553	8	2.44462		Trial 1	F5	UP	F	0:03:15.776-0:03:16.042	IT1	0.175853	8	0.658787
Trial 1	F1	P	F	0:03:16.042-0:03:16.308	IT1	0.636123	8	2.38308		Trial 1	F5	UP	F	0:03:16.042-0:03:16.308	IT1	0.0342069	8	0.128148
Trial 1	F1	P	F	0:03:16.308-0:03:16.574	IT1	0.239879	8	0.898651		Trial 1	F5	UP	F	0:03:16.308-0:03:16.574	IT1	0.074889	8	0.280553
Trial 1	F1	P	F	0:03:16.574-0:03:16.840	IT1	0.31941	8	1.19659		Trial 1	F5	UP	F	0:03:16.574-0:03:16.840	IT1	0.0484265	8	0.181417
Trial 1	F1	P	F	0:03:16.840-0:03:17.106	IT1	0.714349	8	2.67613		Trial 1	F5	UP	F	0:03:16.840-0:03:17.106	IT1	0.0568976	8	0.213154
Trial 1	F1	P	F	0:03:17.106-0:03:17.372	IT1	0.907007	8	3.39788		Trial 1	F5	UP	F	0:03:17.106-0:03:17.372	IT1	0.0622906	8	0.233356
Trial 1	F1	P	F	0:03:17.372-0:03:17.638	IT1	0.352982	8	1.32236		Trial 1	F5	UP	F	0:03:17.372-0:03:17.638	IT1	0.102853	8	0.385311
Trial 1	F1	P	F	0:03:17.638-0:03:17.904	IT1	0.568464	8	2.12961		Trial 1	F5	UP	F	0:03:17.638-0:03:17.904	IT1	0.0588999	8	0.220654
Trial 1	F1	P	F	0:03:17.904-0:03:18.170	IT1	0.332578	8	1.24591		Trial 1	F5	UP	F	0:03:17.904-0:03:18.170	IT1	0.0324985	8	0.121747
Trial 1	F1	P	F	0:03:18.170-0:03:18.436	IT1	0.146671	8	0.549466		Trial 1	F5	UP	F	0:03:18.170-0:03:18.436	IT1	0.133004	8	0.498263
Trial 1	F1	P	F	0:03:18.436-0:03:18.702	IT1	0.189886	8	0.711359		Trial 1	F5	UP	F	0:03:18.436-0:03:18.702	IT1	0.060955	8	0.228351
Trial 1	F1	P	F	0:03:18.702-0:03:18.968	IT1	0.481559	8	1.80404		Trial 1	F5	UP	F	0:03:18.702-0:03:18.968	IT1	0.115933	8	0.434312
Trial 1	F1	P	F	0:03:18.968-0:03:19.234	IT1	0.30775	8	1.15291		Trial 1	F5	UP	F	0:03:18.968-0:03:19.234	IT1	0.0745985	8	0.279464
Trial 1	F1	P	F	0:03:19.234-0:03:19.500	IT1	0.234643	8	0.879026		Trial 1	F5	UP	F	0:03:19.234-0:03:19.500	IT1	0.198854	8	0.744954
Trial 1	F1	P	F	0:03:19.500-0:03:19.766	IT1	0.615291	7	2.63433		Trial 1	F5	UP	F	0:03:19.500-0:03:19.766	IT1	0.0953413	7	0.408198
Trial 1	F1	P	F	0:03:19.766-0:03:20.032	IT1	0.64434	8	2.41386		Trial 1	F5	UP	F	0:03:19.766-0:03:20.032	IT1	0.10283	8	0.385233
Trial 1	F1	P	F	0:03:20.032-0:03:20.298	IT1	0.699664	8	2.62112		Trial 1	F5	UP	F	0:03:20.032-0:03:20.298	IT1	0.110672	8	0.414604
Trial 1	F1	P	F	0:03:20.298-0:03:20.564	IT1	0.462937	8	1.73427		Trial 1	F5	UP	F	0:03:20.298-0:03:20.564	IT1	0.133023	8	0.498335
Trial 1	F1	P	F	0:03:20.564-0:03:20.830	IT1	0.278739	8	1.04423		Trial 1	F5	UP	F	0:03:20.564-0:03:20.830	IT1	0.137419	8	0.514806
Trial 1	F1	P	F	0:03:20.830-0:03:21.096	IT1	0.16745	8	0.627309		Trial 1	F5	UP	F	0:03:20.830-0:03:21.096	IT1	0.0713138	8	0.26716
Trial 1	F1	P	F	0:03:21.096-0:03:21.362	IT1	0.753271	8	2.82195		Trial 1	F5	UP	F	0:03:21.096-0:03:21.362	IT1	0.0607431	8	0.227558
Trial 1	F1	P	F	0:03:21.362-0:03:21.628	IT1	1.20767	8	4.52424		Trial 1	F5	UP	F	0:03:21.362-0:03:21.628	IT1	0.083196	8	0.311672
Trial 1	F1	P	F	0:03:21.628-0:03:21.894	IT1	0.146635	8	0.549332		Trial 1	F5	UP	F	0:03:21.628-0:03:21.894	IT1	0.168619	8	0.631686
Trial 1	F1	P	F	0:03:21.894-0:03:22.160	IT1	0.08512	8	0.318883		Trial 1	F5	UP	F	0:03:21.894-0:03:22.160	IT1	0.189351	8	0.709355
Trial 1	F1	P	F	0:03:22.160-0:03:22.426	IT1	0.50699	8	1.8993		Trial 1	F5	UP	F	0:03:22.160-0:03:22.426	IT1	0.0888637	8	0.332905
Trial 1	F1	P	F	0:03:22.426-0:03:22.692	IT1	0.765134	8	2.86639		Trial 1	F5	UP	F	0:03:22.426-0:03:22.692	IT1	0.0735287	8	0.275458
Trial 1	F1	P	F	0:03:22.692-0:03:22.958	IT1	0.109878	8	0.411627		Trial 1	F5	UP	F	0:03:22.692-0:03:22.958	IT1	0.0229073	8	0.0858169
Trial 1	F1	P	F	0:03:22.958-0:03:23.224	IT1	0.0624362	8	0.233902		Trial 1	F5	UP	F	0:03:22.958-0:03:23.224	IT1	0.211815	8	0.793511
Trial 1	F1	P	F	0:03:23.224-0:03:23.490	IT1	0.024531	8	0.091899		Trial 1	F5	UP	F	0:03:23.224-0:03:23.490	IT1	0.128278	8	0.480563
Trial 1	F1	P	F	0:03:23.490-0:03:23.756	IT1	0.0436797	8	0.163634		Trial 1	F5	UP	F	0:03:23.490-0:03:23.756	IT1	0.154664	8	0.579406
Trial 1	F1	P	F	0:03:23.756-0:03:24.022	IT1	0.00687375	8	0.0257508		Trial 1	F5	UP	F	0:03:23.756-0:03:24.022	IT1	0.0821792	8	0.307864
Trial 1	F1	P	F	0:03:24.022-0:03:24.288	IT1	0.104548	8	0.391661		Trial 1	F5	UP	F	0:03:24.022-0:03:24.288	IT1	0.095322	8	0.357098
Trial 1	F1	P	F	0:03:24.288-0:03:24.554	IT1	0.0984479	8	0.368809		Trial 1	F5	UP	F	0:03:24.288-0:03:24.554	IT1	0.0743952	8	0.278702
Trial 1	F1	P	F	0:03:24.554-0:03:24.820	IT1	0.185391	8	0.694524		Trial 1	F5	UP	F	0:03:24.554-0:03:24.820	IT1	0.0369121	8	0.138282
Trial 1	F1	P	F	0:03:24.820-0:03:25.086	IT1	0.16623	8	0.62274		Trial 1	F5	UP	F	0:03:24.820-0:03:25.086	IT1	0.0717414	8	0.268759
Trial 1	F1	P	F	0:03:25.086-0:03:25.352	IT1	0.0474947	8	0.177928		Trial 1	F5	UP	F	0:03:25.086-0:03:25.352	IT1	0.0610295	8	0.228631
Trial 1	F1	P	F	0:03:25.352-0:03:25.618	IT1	0.0488229	8	0.182902		Trial 1	F5	UP	F	0:03:25.352-0:03:25.618	IT1	0.100787	8	0.377571
Trial 1	F1	P	F	0:03:25.618-0:03:25.884	IT1	0.120979	8	0.453216		Trial 1	F5	UP	F	0:03:25.618-0:03:25.884	IT1	0.0299319	8	0.112133
Trial 1	F1	P	F	0:03:25.884-0:03:26.150	IT1	0.098837	8	0.37027		Trial 1	F5	UP	F	0:03:25.884-0:03:26.150	IT1	0.111364	8	0.417199
Trial 1	F1	P	F	0:03:26.150-0:03:26.416	IT1	0.144793	8	0.542431		Trial 1	F5	UP	F	0:03:26.150-0:03:26.416	IT1	0.146197	8	0.547689
Trial 1	F1	P	F	0:03:26.416-0:03:26.682	IT1	0.0982835	8	0.368194		Trial 1	F5	UP	F	0:03:26.416-0:03:26.682	IT1	0.145575	8	0.545357
Trial 1	F1	P	F	0:03:26.682-0:03:26.948	IT1	0.0601009	8	0.225152		Trial 1	F5	UP	F	0:03:26.682-0:03:26.948	IT1	0.101155	8	0.37895
Trial 1	F1	P	F	0:03:26.948-0:03:27.214	IT1	0.0630074	8	0.23604		Trial 1	F5	UP	F	0:03:26.948-0:03:27.214	IT1	0.116959	8	0.438157
Trial 1	F1	P	F	0:03:27.214-0:03:27.480	IT1	0.269034	8	1.00787		Trial 1	F5	UP	F	0:03:27.214-0:03:27.480	IT1	0.103467	8	0.387614
Trial 1	F1	P	F	0:03:27.480-0:03:27.746	IT1	0.121103	8	0.453678		Trial 1	F5	UP	F	0:03:27.480-0:03:27.746	IT1	0.0506693	8	0.189819
Trial 1	F1	P	F	0:03:27.746-0:03:28.012	IT1	0.143204	8	0.536477		Trial 1	F5	UP	F	0:03:27.746-0:03:28.012	IT1	0.0856548	8	0.320884
Trial 1	F1	P	F	0:03:28.012-0:03:28.278	IT1	0.159763	8	0.598514		Trial 1	F5	UP	F	0:03:28.012-0:03:28.278	IT1	0.182194	8	0.682541
Trial 1	F1	P	F	0:03:28.278-0:03:28.544	IT1	0.114217	8	0.427882		Trial 1	F5	UP	F	0:03:28.278-0:03:28.544	IT1	0.20493	8	0.767715
Trial 1	F1	P	F	0:03:28.544-0:03:28.810	IT1	0.219717	8	0.823118		Trial 1	F5	UP	F	0:03:28.544-0:03:28.810	IT1	0.0892151	8	0.334222
Trial 1	F1	P	F	0:03:28.810-0:03:29.076	IT1	0.246494	8	0.923425		Trial 1	F5	UP	F	0:03:28.810-0:03:29.076	IT1	0.0608075	8	0.227801
Trial 1	F1	P	F	0:03:29.076-0:03:29.342	IT1	0.400739	7	1.71575		Trial 1	F5	UP	F	0:03:29.076-0:03:29.342	IT1	0.0877003	7	0.375486
Trial 1	F1	P	F	0:03:29.342-0:03:29.608	IT1	0.33396	8	1.2511		Trial 1	F5	UP	F	0:03:29.342-0:03:29.608	IT1	0.0528814	8	0.198107
Trial 1	F1	P	F	0:03:29.608-0:03:29.874	IT1	0.170125	8	0.637328		Trial 1	F5	UP	F	0:03:29.608-0:03:29.874	IT1	0.131273	8	0.491783
Trial 1	F1	P	F	0:03:29.874-0:03:30.140	IT1	0.108107	8	0.404995		Trial 1	F5	UP	F	0:03:29.874-0:03:30.140	IT1	0.0337187	8	0.126319
Trial 1	F1	P	F	0:03:30.140-0:03:30.406	IT1	0.265457	8	0.99447		Trial 1	F5	UP	F	0:03:30.140-0:03:30.406	IT1	0.135219	8	0.506563
Trial 1	F1	P	F	0:03:30.406-0:03:30.672	IT1	0.382226	8	1.43191		Trial 1	F5	UP	F	0:03:30.406-0:03:30.672	IT1	0.033018	8	0.123695
Trial 1	F1	P	F	0:03:30.672-0:03:30.938	IT1	0.166635	8	0.624254		Trial 1	F5	UP	F	0:03:30.672-0:03:30.938	IT1	0.108655	8	0.407048
Trial 1	F1	P	F	0:03:30.938-0:03:31.204	IT1	0.309341	8	1.15887		Trial 1	F5	UP	F	0:03:30.938-0:03:31.204	IT1	0.388907	8	1.45694
Trial 1	F1	P	F	0:03:31.204-0:03:31.470	IT1	0.335666	8	1.25749		Trial 1	F5	UP	F	0:03:31.204-0:03:31.470	IT1	4.172	8	15.6294
Trial 1	F1	P	F	0:03:31.470-0:03:31.736	IT1	0.483802	8	1.81243		Trial 1	F5	UP	F	0:03:31.470-0:03:31.736	IT1	8.16523	8	30.5889
Trial 1	F1	P	F	0:03:31.736-0:03:32.002	IT1	0.637678	8	2.3889		Trial 1	F5	UP	F	0:03:31.736-0:03:32.002	IT1	5.34613	8	20.0279
Trial 1	F1	P	F	0:03:32.002-0:03:32.268	IT1	0.196849	8	0.737451		Trial 1	F5	UP	F	0:03:32.002-0:03:32.268	IT1	2.89017	8	10.8273
Trial 1	F1	P	F	0:03:32.268-0:03:32.534	IT1	0.0838307	8	0.31405		Trial 1	F5	UP	F	0:03:32.268-0:03:32.534	IT1	0.76938	8	2.88229
Trial 1	F1	P	F	0:03:32.534-0:03:32.800	IT1	0.0684744	8	0.256522		Trial 1	F5	UP	F	0:03:32.534-0:03:32.800	IT1	0.243002	8	0.910353
Trial 1	F1	P	F	0:03:32.800-0:03:33.066	IT1	0.0239915	8	0.0898778		Trial 1	F5	UP	F	0:03:32.800-0:03:33.066	IT1	0.212879	8	0.797497
Trial 1	F1	P	F	0:03:33.066-0:03:33.332	IT1	0.146938	8	0.550465		Trial 1	F5	UP	F	0:03:33.066-0:03:33.332	IT1	0.291073	8	1.09043
Trial 1	F1	P	F	0:03:33.332-0:03:33.598	IT1	0.0244248	8	0.0915017		Trial 1	F5	UP	F	0:03:33.332-0:03:33.598	IT1	0.22316	8	0.836016
Trial 1	F1	P	F	0:03:33.598-0:03:33.864	IT1	0.017213	8	0.0644836		Trial 1	F5	UP	F	0:03:33.598-0:03:33.864	IT1	0.139802	8	0.523735
Trial 1	F1	P	F	0:03:33.864-0:03:34.130	IT1	0.0518179	8	0.194124		Trial 1	F5	UP	F	0:03:33.864-0:03:34.130	IT1	0.166293	8	0.622972
Trial 1	F1	P	F	0:03:34.130-0:03:34.396	IT1	0.00825149	8	0.030912		Trial 1	F5	UP	F	0:03:34.130-0:03:34.396	IT1	0.0604548	8	0.226479
Trial 1	F1	P	F	0:03:34.396-0:03:34.662	IT1	0.107732	8	0.403589		Trial 1	F5	UP	F	0:03:34.396-0:03:34.662	IT1	0.105834	8	0.396481
Trial 1	F1	P	F	0:03:34.662-0:03:34.928	IT1	0.0194024	8	0.0726867		Trial 1	F5	UP	F	0:03:34.662-0:03:34.928	IT1	0.0359687	8	0.13475
Trial 1	F1	P	F	0:03:34.928-0:03:35.194	IT1	0.0553629	8	0.207403		Trial 1	F5	UP	F	0:03:34.928-0:03:35.194	IT1	0.618868	8	2.31843
Trial 1	F1	P	F	0:03:35.194-0:03:35.460	IT1	0.0161723	8	0.0605855		Trial 1	F5	UP	F	0:03:35.194-0:03:35.460	IT1	1.22056	8	4.57252
Trial 1	F1	P	F	0:03:35.460-0:03:35.726	IT1	0.543146	8	2.03476		Trial 1	F5	UP	F	0:03:35.460-0:03:35.726	IT1	2.53565	8	9.49917
Trial 1	F1	P	F	0:03:35.726-0:03:35.992	IT1	0.717949	8	2.68962		Trial 1	F5	UP	F	0:03:35.726-0:03:35.992	IT1	2.08591	8	7.81436
Trial 1	F1	P	F	0:03:35.992-0:03:36.258	IT1	0.146618	8	0.549266		Trial 1	F5	UP	F	0:03:35.992-0:03:36.258	IT1	0.814758	8	3.05229
Trial 1	F1	P	F	0:03:36.258-0:03:36.524	IT1	0.101063	8	0.378608		Trial 1	F5	UP	F	0:03:36.258-0:03:36.524	IT1	3.04615	8	11.4117
Trial 1	F1	P	F	0:03:36.524-0:03:36.790	IT1	0.0760464	8	0.284891		Trial 1	F5	UP	F	0:03:36.524-0:03:36.790	IT1	1.65414	8	6.19684
Trial 1	F1	P	F	0:03:36.790-0:03:37.056	IT1	0.0936373	8	0.35079		Trial 1	F5	UP	F	0:03:36.790-0:03:37.056	IT1	0.384524	8	1.44051
Trial 1	F1	P	F	0:03:37.056-0:03:37.322	IT1	0.0644229	8	0.241343		Trial 1	F5	UP	F	0:03:37.056-0:03:37.322	IT1	0.103052	8	0.38606
Trial 1	F1	P	F	0:03:37.322-0:03:37.588	IT1	0.06958	8	0.260664		Trial 1	F5	UP	F	0:03:37.322-0:03:37.588	IT1	0.162481	8	0.608691
Trial 1	F1	P	F	0:03:37.588-0:03:37.854	IT1	0.03326	8	0.1246		Trial 1	F5	UP	F	0:03:37.588-0:03:37.854	IT1	0.0418919	8	0.156937
Trial 1	F1	P	F	0:03:37.854-0:03:38.120	IT1	0.0792008	8	0.296708		Trial 1	F5	UP	F	0:03:37.854-0:03:38.120	IT1	0.0747535	8	0.280048
Trial 1	F1	P	F	0:03:38.120-0:03:38.386	IT1	0.143537	8	0.537726		Trial 1	F5	UP	F	0:03:38.120-0:03:38.386	IT1	0.0745689	8	0.279352
Trial 1	F1	P	F	0:03:38.386-0:03:38.652	IT1	0.0566994	8	0.212409		Trial 1	F5	UP	F	0:03:38.386-0:03:38.652	IT1	0.130077	8	0.4873
Trial 1	F1	P	F	0:03:38.652-0:03:38.918	IT1	0.0667292	7	0.285699		Trial 1	F5	UP	F	0:03:38.652-0:03:38.918	IT1	0.0491764	7	0.210545
Trial 1	F1	P	F	0:03:38.918-0:03:39.184	IT1	0.146183	8	0.547635		Trial 1	F5	UP	F	0:03:38.918-0:03:39.184	IT1	0.0173876	8	0.0651384
Trial 1	F1	P	F	0:03:39.184-0:03:39.450	IT1	0.168039	8	0.629512		Trial 1	F5	UP	F	0:03:39.184-0:03:39.450	IT1	0.133252	8	0.499193
Trial 1	F1	P	F	0:03:39.450-0:03:39.716	IT1	0.045172	8	0.169226		Trial 1	F5	UP	F	0:03:39.450-0:03:39.716	IT1	0.112718	8	0.422272
Trial 1	F1	P	F	0:03:39.716-0:03:39.982	IT1	0.0644267	8	0.241358		Trial 1	F5	UP	F	0:03:39.716-0:03:39.982	IT1	0.0901825	8	0.337845
Trial 1	F1	P	F	0:03:39.982-0:03:40.248	IT1	0.0633673	8	0.237389		Trial 1	F5	UP	F	0:03:39.982-0:03:40.248	IT1	0.0242711	8	0.0909255
Trial 1	F1	P	F	0:03:40.248-0:03:40.514	IT1	0.0776878	8	0.291038		Trial 1	F5	UP	F	0:03:40.248-0:03:40.514	IT1	0.054018	8	0.202364
Trial 1	F1	P	F	0:03:40.514-0:03:40.780	IT1	0.0883326	8	0.330915		Trial 1	F5	UP	F	0:03:40.514-0:03:40.780	IT1	0.0490043	8	0.183582
Trial 1	F1	P	F	0:03:40.780-0:03:41.046	IT1	0.115012	8	0.430867		Trial 1	F5	UP	F	0:03:40.780-0:03:41.046	IT1	0.0290731	8	0.108917
Trial 1	F1	P	F	0:03:41.046-0:03:41.312	IT1	0.068255	8	0.2557		Trial 1	F5	UP	F	0:03:41.046-0:03:41.312	IT1	0.0280678	8	0.105149
Trial 1	F1	P	F	0:03:41.312-0:03:41.578	IT1	0.0499026	8	0.186947		Trial 1	F5	UP	F	0:03:41.312-0:03:41.578	IT1	0.0153507	8	0.0575072
Trial 1	F1	P	F	0:03:41.578-0:03:41.844	IT1	0.104767	8	0.392484		Trial 1	F5	UP	F	0:03:41.578-0:03:41.844	IT1	0.0533238	8	0.199763
Trial 1	F1	P	F	0:03:41.844-0:03:42.110	IT1	1.16692	8	4.37161		Trial 1	F5	UP	F	0:03:41.844-0:03:42.110	IT1	0.0314172	8	0.117697
Trial 1	F1	P	F	0:03:42.110-0:03:42.376	IT1	0.224243	8	0.840071		Trial 1	F5	UP	F	0:03:42.110-0:03:42.376	IT1	0.0281891	8	0.105603
Trial 1	F1	P	F	0:03:42.376-0:03:42.642	IT1	0.101583	8	0.380554		Trial 1	F5	UP	F	0:03:42.376-0:03:42.642	IT1	0.0382314	8	0.143226
Trial 1	F1	P	F	0:03:42.642-0:03:42.908	IT1	1.10807	8	4.1511		Trial 1	F5	UP	F	0:03:42.642-0:03:42.908	IT1	0.0442337	8	0.16571
Trial 1	F1	P	F	0:03:42.908-0:03:43.174	IT1	0.377519	8	1.41428		Trial 1	F5	UP	F	0:03:42.908-0:03:43.174	IT1	0.0293224	8	0.10985
Trial 1	F1	P	F	0:03:43.174-0:03:43.440	IT1	0.123917	8	0.464221		Trial 1	F5	UP	F	0:03:43.174-0:03:43.440	IT1	0.0430128	8	0.161136
Trial 1	F1	P	F	0:03:43.440-0:03:43.706	IT1	0.104806	8	0.392628		Trial 1	F5	UP	F	0:03:43.440-0:03:43.706	IT1	0.105197	8	0.394097
Trial 1	F1	P	F	0:03:43.706-0:03:43.972	IT1	0.0842246	8	0.31553		Trial 1	F5	UP	F	0:03:43.706-0:03:43.972	IT1	0.0932129	8	0.349198
Trial 1	F1	P	F	0:03:43.972-0:03:44.238	IT1	0.202938	8	0.760252		Trial 1	F5	UP	F	0:03:43.972-0:03:44.238	IT1	0.215991	8	0.809162
Trial 1	F1	P	F	0:03:44.238-0:03:44.504	IT1	0.785455	8	2.94252		Trial 1	F5	UP	F	0:03:44.238-0:03:44.504	IT1	0.0790052	8	0.295973
Trial 1	F1	P	F	0:03:44.504-0:03:44.770	IT1	0.49655	8	1.8602		Trial 1	F5	UP	F	0:03:44.504-0:03:44.770	IT1	0.0233113	8	0.08733
Trial 1	F1	P	F	0:03:44.770-0:03:45.036	IT1	0.0525647	8	0.196923		Trial 1	F5	UP	F	0:03:44.770-0:03:45.036	IT1	0.0173971	8	0.0651744
Trial 1	F1	P	F	0:03:45.036-0:03:45.302	IT1	0.105137	8	0.39387		Trial 1	F5	UP	F	0:03:45.036-0:03:45.302	IT1	0.0384291	8	0.143965
Trial 1	F1	P	F	0:03:45.302-0:03:45.568	IT1	0.0779712	8	0.292098		Trial 1	F5	UP	F	0:03:45.302-0:03:45.568	IT1	0.0500874	8	0.187639
Trial 1	F1	P	F	0:03:45.568-0:03:45.834	IT1	0.0913904	8	0.342372		Trial 1	F5	UP	F	0:03:45.568-0:03:45.834	IT1	0.0577587	8	0.216378
Trial 1	F1	P	F	0:03:45.834-0:03:46.100	IT1	0.0731467	8	0.274026		Trial 1	F5	UP	F	0:03:45.834-0:03:46.100	IT1	0.0517476	8	0.193859
Trial 1	F1	P	F	0:03:46.100-0:03:46.366	IT1	0.0539839	8	0.202238		Trial 1	F5	UP	F	0:03:46.100-0:03:46.366	IT1	0.0127621	8	0.0478102
Trial 1	F1	P	F	0:03:46.366-0:03:46.632	IT1	0.0699347	8	0.261992		Trial 1	F5	UP	F	0:03:46.366-0:03:46.632	IT1	0.0250359	8	0.0937908
Trial 1	F1	P	F	0:03:46.632-0:03:46.898	IT1	0.0348579	8	0.130586		Trial 1	F5	UP	F	0:03:46.632-0:03:46.898	IT1	0.0117999	8	0.0442052
Trial 1	F1	P	F	0:03:46.898-0:03:47.164	IT1	0.0504927	8	0.189159		Trial 1	F5	UP	F	0:03:46.898-0:03:47.164	IT1	0.035391	8	0.132585
Trial 1	F1	P	F	0:03:47.164-0:03:47.430	IT1	0.014601	8	0.0546987		Trial 1	F5	UP	F	0:03:47.164-0:03:47.430	IT1	0.0371851	8	0.139304
Trial 1	F1	P	F	0:03:47.430-0:03:47.696	IT1	0.0384475	8	0.144034		Trial 1	F5	UP	F	0:03:47.430-0:03:47.696	IT1	0.0394918	8	0.147946
Trial 1	F1	P	F	0:03:47.696-0:03:47.962	IT1	0.0218149	8	0.0817237		Trial 1	F5	UP	F	0:03:47.696-0:03:47.962	IT1	0.0231986	8	0.0869074
Trial 1	F1	P	F	0:03:47.962-0:03:48.228	IT1	0.0132969	7	0.0569295		Trial 1	F5	UP	F	0:03:47.962-0:03:48.228	IT1	0.0110373	7	0.0472553
Trial 1	F1	P	F	0:03:48.228-0:03:48.494	IT1	0.0667863	8	0.250197		Trial 1	F5	UP	F	0:03:48.228-0:03:48.494	IT1	0.0298383	8	0.111781
Trial 1	F1	P	F	0:03:48.494-0:03:48.760	IT1	0.0319676	8	0.119758		Trial 1	F5	UP	F	0:03:48.494-0:03:48.760	IT1	0.0194652	8	0.0729211
Trial 1	F1	P	F	0:03:48.760-0:03:49.026	IT1	0.0686789	8	0.257289		Trial 1	F5	UP	F	0:03:48.760-0:03:49.026	IT1	0.191497	8	0.717388
Trial 1	F1	P	F	0:03:49.026-0:03:49.292	IT1	0.0521621	8	0.195411		Trial 1	F5	UP	F	0:03:49.026-0:03:49.292	IT1	0.675424	8	2.5303
Trial 1	F1	P	F	0:03:49.292-0:03:49.558	IT1	0.164196	8	0.615113		Trial 1	F5	UP	F	0:03:49.292-0:03:49.558	IT1	0.459831	8	1.72264
Trial 1	F1	P	F	0:03:49.558-0:03:49.824	IT1	0.0918569	8	0.344119		Trial 1	F5	UP	F	0:03:49.558-0:03:49.824	IT1	0.426341	8	1.59718
Trial 1	F1	P	F	0:03:49.824-0:03:50.090	IT1	0.0669051	8	0.250646		Trial 1	F5	UP	F	0:03:49.824-0:03:50.090	IT1	0.460056	8	1.72348
Trial 1	F1	P	F	0:03:50.090-0:03:50.356	IT1	0.0831306	8	0.311427		Trial 1	F5	UP	F	0:03:50.090-0:03:50.356	IT1	0.382667	8	1.43356
Trial 1	F1	P	F	0:03:50.356-0:03:50.622	IT1	0.0340863	8	0.127697		Trial 1	F5	UP	F	0:03:50.356-0:03:50.622	IT1	0.371742	8	1.39264
Trial 1	F1	P	F	0:03:50.622-0:03:50.888	IT1	0.102014	8	0.38217		Trial 1	F5	UP	F	0:03:50.622-0:03:50.888	IT1	0.965357	8	3.61646
Trial 1	F1	P	F	0:03:50.888-0:03:51.154	IT1	0.016108	8	0.0603447		Trial 1	F5	UP	F	0:03:50.888-0:03:51.154	IT1	1.12209	8	4.20366
Trial 1	F1	P	F	0:03:51.154-0:03:51.420	IT1	0.0728273	8	0.272828		Trial 1	F5	UP	F	0:03:51.154-0:03:51.420	IT1	0.286211	8	1.07222
Trial 1	F1	P	F	0:03:51.420-0:03:51.686	IT1	0.0481083	8	0.180225		Trial 1	F5	UP	F	0:03:51.420-0:03:51.686	IT1	0.547253	8	2.05014
Trial 1	F1	P	F	0:03:51.686-0:03:51.952	IT1	0.0494162	8	0.185125		Trial 1	F5	UP	F	0:03:51.686-0:03:51.952	IT1	0.869114	8	3.25592
Trial 1	F1	P	F	0:03:51.952-0:03:52.218	IT1	0.121386	8	0.454742		Trial 1	F5	UP	F	0:03:51.952-0:03:52.218	IT1	0.245241	8	0.918732
Trial 1	F1	P	F	0:03:52.218-0:03:52.484	IT1	0.10147	8	0.380131		Trial 1	F5	UP	F	0:03:52.218-0:03:52.484	IT1	0.109442	8	0.409999
Trial 1	F1	P	F	0:03:52.484-0:03:52.750	IT1	0.933863	8	3.49848		Trial 1	F5	UP	F	0:03:52.484-0:03:52.750	IT1	0.104069	8	0.389866
Trial 1	F1	P	F	0:03:52.750-0:03:53.016	IT1	1.28642	8	4.81928		Trial 1	F5	UP	F	0:03:52.750-0:03:53.016	IT1	0.0269539	8	0.100976
Trial 1	F1	P	F	0:03:53.016-0:03:53.282	IT1	0.829964	8	3.10926		Trial 1	F5	UP	F	0:03:53.016-0:03:53.282	IT1	0.0702242	8	0.263078
Trial 1	F1	P	F	0:03:53.282-0:03:53.548	IT1	0.144436	8	0.54109		Trial 1	F5	UP	F	0:03:53.282-0:03:53.548	IT1	0.0409982	8	0.153589
Trial 1	F1	P	F	0:03:53.548-0:03:53.814	IT1	0.138249	8	0.517914		Trial 1	F5	UP	F	0:03:53.548-0:03:53.814	IT1	0.0759245	8	0.284432
Trial 1	F1	P	F	0:03:53.814-0:03:54.080	IT1	0.107434	8	0.402471		Trial 1	F5	UP	F	0:03:53.814-0:03:54.080	IT1	0.0359055	8	0.134511
Trial 1	F1	P	F	0:03:54.080-0:03:54.346	IT1	0.0616006	8	0.230772		Trial 1	F5	UP	F	0:03:54.080-0:03:54.346	IT1	0.0932344	8	0.349279
Trial 1	F1	P	F	0:03:54.346-0:03:54.612	IT1	0.0491418	8	0.1841		Trial 1	F5	UP	F	0:03:54.346-0:03:54.612	IT1	0.0170881	8	0.0640169
Trial 1	F1	P	F	0:03:54.612-0:03:54.878	IT1	0.0587346	8	0.220033		Trial 1	F5	UP	F	0:03:54.612-0:03:54.878	IT1	0.0710352	8	0.266115
Trial 1	F1	P	F	0:03:54.878-0:03:55.144	IT1	0.0537466	8	0.201349		Trial 1	F5	UP	F	0:03:54.878-0:03:55.144	IT1	0.0536426	8	0.200961
Trial 1	F1	P	F	0:03:55.144-0:03:55.410	IT1	0.0188801	8	0.0707292		Trial 1	F5	UP	F	0:03:55.144-0:03:55.410	IT1	0.0644148	8	0.241314
Trial 1	F1	P	F	0:03:55.410-0:03:55.676	IT1	0.094467	8	0.353895		Trial 1	F5	UP	F	0:03:55.410-0:03:55.676	IT1	0.0614569	8	0.230233
Trial 1	F1	P	F	0:03:55.676-0:03:55.942	IT1	0.0734314	8	0.275092		Trial 1	F5	UP	F	0:03:55.676-0:03:55.942	IT1	0.169537	8	0.635131
Trial 1	F1	P	F	0:03:55.942-0:03:56.208	IT1	0.0512891	8	0.192142		Trial 1	F5	UP	F	0:03:55.942-0:03:56.208	IT1	0.547931	8	2.05268
Trial 1	F1	P	F	0:03:56.208-0:03:56.474	IT1	0.0184957	8	0.0692896		Trial 1	F5	UP	F	0:03:56.208-0:03:56.474	IT1	0.529006	8	1.98179
Trial 1	F1	P	F	0:03:56.474-0:03:56.740	IT1	0.104026	8	0.389707		Trial 1	F5	UP	F	0:03:56.474-0:03:56.740	IT1	0.409068	8	1.53246
Trial 1	F1	P	F	0:03:56.740-0:03:57.006	IT1	0.0495371	8	0.185577		Trial 1	F5	UP	F	0:03:56.740-0:03:57.006	IT1	0.490391	8	1.83712
Trial 1	F1	P	F	0:03:57.006-0:03:57.272	IT1	0.0239011	8	0.0895399		Trial 1	F5	UP	F	0:03:57.006-0:03:57.272	IT1	0.495051	8	1.85459
Trial 1	F1	P	F	0:03:57.272-0:03:57.538	IT1	0.0769938	8	0.288437		Trial 1	F5	UP	F	0:03:57.272-0:03:57.538	IT1	0.581187	8	2.17727
Trial 1	F1	P	F	0:03:57.538-0:03:57.804	IT1	0.0343541	7	0.147085		Trial 1	F5	UP	F	0:03:57.538-0:03:57.804	IT1	0.202848	7	0.86848
Trial 1	F1	P	F	0:03:57.804-0:03:58.070	IT1	0.20334	8	0.761758		Trial 1	F5	UP	F	0:03:57.804-0:03:58.070	IT1	0.596409	8	2.23431
Trial 1	F1	P	F	0:03:58.070-0:03:58.336	IT1	0.0864334	8	0.323802		Trial 1	F5	UP	F	0:03:58.070-0:03:58.336	IT1	0.33756	8	1.26458
Trial 1	F1	P	F	0:03:58.336-0:03:58.602	IT1	0.115508	8	0.432722		Trial 1	F5	UP	F	0:03:58.336-0:03:58.602	IT1	0.375892	8	1.40819
Trial 1	F1	P	F	0:03:58.602-0:03:58.868	IT1	0.1753	8	0.656715		Trial 1	F5	UP	F	0:03:58.602-0:03:58.868	IT1	0.259564	8	0.972403
Trial 1	F1	P	F	0:03:58.868-0:03:59.134	IT1	0.254833	8	0.954668		Trial 1	F5	UP	F	0:03:58.868-0:03:59.134	IT1	0.107692	8	0.403441
Trial 1	F1	P	F	0:03:59.134-0:03:59.400	IT1	0.214502	8	0.803588		Trial 1	F5	UP	F	0:03:59.134-0:03:59.400	IT1	0.0830757	8	0.311224
Trial 1	F1	P	F	0:03:59.400-0:03:59.666	IT1	0.463253	8	1.73546		Trial 1	F5	UP	F	0:03:59.400-0:03:59.666	IT1	0.0883077	8	0.330822
Trial 1	F1	P	F	0:03:59.666-0:03:59.932	IT1	0.464157	8	1.73885		Trial 1	F5	UP	F	0:03:59.666-0:03:59.932	IT1	0.0488143	8	0.182872
Trial 1	F1	P	F	0:03:59.932-0:04:00.198	IT1	0.14991	8	0.561598		Trial 1	F5	UP	F	0:03:59.932-0:04:00.198	IT1	0.0968719	8	0.36291
Trial 1	F1	P	F	0:04:00.198-0:04:00.464	IT1	2.47506	8	9.27223		Trial 1	F5	UP	F	0:04:00.198-0:04:00.464	IT1	0.125751	8	0.471094
Trial 1	F1	P	F	0:04:00.464-0:04:00.730	IT1	0.765985	8	2.86958		Trial 1	F5	UP	F	0:04:00.464-0:04:00.730	IT1	0.0555568	8	0.208131
Trial 1	F1	P	F	0:04:00.730-0:04:00.996	IT1	0.76219	8	2.85535		Trial 1	F5	UP	F	0:04:00.730-0:04:00.996	IT1	0.0614378	8	0.23016
Trial 1	F1	P	F	0:04:00.996-0:04:01.262	IT1	0.546946	8	2.049		Trial 1	F5	UP	F	0:04:00.996-0:04:01.262	IT1	0.0222333	8	0.0832915
Trial 1	F1	P	F	0:04:01.262-0:04:01.528	IT1	0.329608	8	1.23479		Trial 1	F5	UP	F	0:04:01.262-0:04:01.528	IT1	0.0288757	8	0.108175
Trial 1	F1	P	F	0:04:01.528-0:04:01.794	IT1	0.112453	8	0.421275		Trial 1	F5	UP	F	0:04:01.528-0:04:01.794	IT1	0.0399811	8	0.149778
Trial 1	F1	P	F	0:04:01.794-0:04:02.060	IT1	0.316075	8	1.1841		Trial 1	F5	UP	F	0:04:01.794-0:04:02.060	IT1	0.0342657	8	0.128369
Trial 1	F1	P	F	0:04:02.060-0:04:02.326	IT1	0.169319	8	0.634309		Trial 1	F5	UP	F	0:04:02.060-0:04:02.326	IT1	0.0365826	8	0.137049
Trial 1	F1	P	F	0:04:02.326-0:04:02.592	IT1	0.349468	8	1.30919		Trial 1	F5	UP	F	0:04:02.326-0:04:02.592	IT1	0.0153057	8	0.0573392
Trial 1	F1	P	F	0:04:02.592-0:04:02.858	IT1	0.201886	8	0.756318		Trial 1	F5	UP	F	0:04:02.592-0:04:02.858	IT1	0.0460306	8	0.172442
Trial 1	F1	P	F	0:04:02.858-0:04:03.124	IT1	0.279996	8	1.04893		Trial 1	F5	UP	F	0:04:02.858-0:04:03.124	IT1	0.0292435	8	0.109554
Trial 1	F1	P	F	0:04:03.124-0:04:03.390	IT1	0.234468	8	0.878384		Trial 1	F5	UP	F	0:04:03.124-0:04:03.390	IT1	0.0604366	8	0.22641
Trial 1	F1	P	F	0:04:03.390-0:04:03.656	IT1	0.288856	8	1.08212		Trial 1	F5	UP	F	0:04:03.390-0:04:03.656	IT1	0.0195531	8	0.0732507
Trial 1	F1	P	F	0:04:03.656-0:04:03.922	IT1	0.234961	8	0.880217		Trial 1	F5	UP	F	0:04:03.656-0:04:03.922	IT1	0.0532003	8	0.199302
Trial 1	F1	P	F	0:04:03.922-0:04:04.188	IT1	0.215241	8	0.806351		Trial 1	F5	UP	F	0:04:03.922-0:04:04.188	IT1	0.0922019	8	0.345411
Trial 1	F1	P	F	0:04:04.188-0:04:04.454	IT1	0.351111	8	1.31535		Trial 1	F5	UP	F	0:04:04.188-0:04:04.454	IT1	0.0921978	8	0.345395
Trial 1	F1	P	F	0:04:04.454-0:04:04.720	IT1	0.169355	8	0.634444		Trial 1	F5	UP	F	0:04:04.454-0:04:04.720	IT1	0.0469185	8	0.175768
Trial 1	F1	P	F	0:04:04.720-0:04:04.986	IT1	0.211571	8	0.792598		Trial 1	F5	UP	F	0:04:04.720-0:04:04.986	IT1	0.0700926	8	0.262586
Trial 1	F1	P	F	0:04:04.986-0:04:05.252	IT1	0.139734	8	0.523476		Trial 1	F5	UP	F	0:04:04.986-0:04:05.252	IT1	0.0751744	8	0.281623
Trial 1	F1	P	F	0:04:05.252-0:04:05.518	IT1	0.134629	8	0.504357		Trial 1	F5	UP	F	0:04:05.252-0:04:05.518	IT1	0.015812	8	0.0592361
Trial 1	F1	P	F	0:04:05.518-0:04:05.784	IT1	0.190112	8	0.712205		Trial 1	F5	UP	F	0:04:05.518-0:04:05.784	IT1	0.0688562	8	0.257951
Trial 1	F1	P	F	0:04:05.784-0:04:06.050	IT1	0.176467	8	0.661086		Trial 1	F5	UP	F	0:04:05.784-0:04:06.050	IT1	0.0858776	8	0.321718
Trial 1	F1	P	F	0:04:06.050-0:04:06.316	IT1	0.388497	8	1.4554		Trial 1	F5	UP	F	0:04:06.050-0:04:06.316	IT1	0.0590153	8	0.221087
Trial 1	F1	P	F	0:04:06.316-0:04:06.582	IT1	0.282467	8	1.05819		Trial 1	F5	UP	F	0:04:06.316-0:04:06.582	IT1	0.0213102	8	0.0798329
Trial 1	F1	P	F	0:04:06.582-0:04:06.848	IT1	0.230709	8	0.864297		Trial 1	F5	UP	F	0:04:06.582-0:04:06.848	IT1	0.113445	8	0.424995
Trial 1	F1	P	F	0:04:06.848-0:04:07.114	IT1	0.477682	8	1.78952		Trial 1	F5	UP	F	0:04:06.848-0:04:07.114	IT1	0.0683752	8	0.256151
Trial 1	F1	P	F	0:04:07.114-0:04:07.380	IT1	0.192374	7	0.823634		Trial 1	F5	UP	F	0:04:07.114-0:04:07.380	IT1	0.0306632	7	0.131283
Trial 1	F1	P	F	0:04:07.380-0:04:07.646	IT1	0.22327	8	0.836426		Trial 1	F5	UP	F	0:04:07.380-0:04:07.646	IT1	0.0676733	8	0.253521
Trial 1	F1	P	F	0:04:07.646-0:04:07.912	IT1	0.292501	8	1.09578		Trial 1	F5	UP	F	0:04:07.646-0:04:07.912	IT1	0.0232787	8	0.0872075
Trial 1	F1	P	F	0:04:07.912-0:04:08.178	IT1	0.100868	8	0.377878		Trial 1	F5	UP	F	0:04:07.912-0:04:08.178	IT1	0.0443402	8	0.166109
Trial 1	F1	P	F	0:04:08.178-0:04:08.444	IT1	0.201946	8	0.756538		Trial 1	F5	UP	F	0:04:08.178-0:04:08.444	IT1	0.0367552	8	0.137694
Trial 1	F1	P	F	0:04:08.444-0:04:08.710	IT1	0.156792	8	0.587383		Trial 1	F5	UP	F	0:04:08.444-0:04:08.710	IT1	0.0462634	8	0.173313
Trial 1	F1	P	F	0:04:08.710-0:04:08.976	IT1	0.0485619	8	0.181927		Trial 1	F5	UP	F	0:04:08.710-0:04:08.976	IT1	0.0366587	8	0.137335
Trial 1	F1	P	F	0:04:08.976-0:04:09.242	IT1	0.0292231	8	0.109477		Trial 1	F5	UP	F	0:04:08.976-0:04:09.242	IT1	0.0618781	8	0.231812
Trial 1	F1	P	F	0:04:09.242-0:04:09.508	IT1	0.133135	8	0.498757		Trial 1	F5	UP	F	0:04:09.242-0:04:09.508	IT1	0.0787665	8	0.295078
Trial 1	F1	P	F	0:04:09.508-0:04:09.774	IT1	0.0166139	8	0.0622395		Trial 1	F5	UP	F	0:04:09.508-0:04:09.774	IT1	0.0267906	8	0.100364
Trial 1	F1	P	F	0:04:09.774-0:04:10.040	IT1	0.0672393	8	0.251894		Trial 1	F5	UP	F	0:04:09.774-0:04:10.040	IT1	0.0384432	8	0.144017
Trial 1	F1	P	F	0:04:10.040-0:04:10.306	IT1	0.0423009	8	0.15847		Trial 1	F5	UP	F	0:04:10.040-0:04:10.306	IT1	0.00645136	8	0.0241685
Trial 1	F1	P	F	0:04:10.306-0:04:10.572	IT1	0.211005	8	0.790476		Trial 1	F5	UP	F	0:04:10.306-0:04:10.572	IT1	0.0843985	8	0.316177
Trial 1	F1	P	F	0:04:10.572-0:04:10.838	IT1	0.0701328	8	0.262735		Trial 1	F5	UP	F	0:04:10.572-0:04:10.838	IT1	0.0331822	8	0.124309
Trial 1	F1	P	F	0:04:10.838-0:04:11.104	IT1	0.0836038	8	0.313204		Trial 1	F5	UP	F	0:04:10.838-0:04:11.104	IT1	0.0623675	8	0.233645
Trial 1	F1	P	F	0:04:11.104-0:04:11.370	IT1	0.0814576	8	0.30516		Trial 1	F5	UP	F	0:04:11.104-0:04:11.370	IT1	0.0627329	8	0.235014
Trial 1	F1	P	F	0:04:11.370-0:04:11.636	IT1	0.0514252	8	0.19265		Trial 1	F5	UP	F	0:04:11.370-0:04:11.636	IT1	0.0284977	8	0.106761
Trial 1	F1	P	F	0:04:11.636-0:04:11.902	IT1	0.076806	8	0.287737		Trial 1	F5	UP	F	0:04:11.636-0:04:11.902	IT1	0.0414022	8	0.155103
Trial 1	F1	P	F	0:04:11.902-0:04:12.168	IT1	0.0588615	8	0.220512		Trial 1	F5	UP	F	0:04:11.902-0:04:12.168	IT1	0.092724	8	0.347366
Trial 1	F1	P	F	0:04:12.168-0:04:12.434	IT1	0.238864	8	0.894846		Trial 1	F5	UP	F	0:04:12.168-0:04:12.434	IT1	0.0944927	8	0.353992
Trial 1	F1	P	F	0:04:12.434-0:04:12.700	IT1	0.506956	8	1.89917		Trial 1	F5	UP	F	0:04:12.434-0:04:12.700	IT1	0.0792502	8	0.296889
Trial 1	F1	P	F	0:04:12.700-0:04:12.966	IT1	0.423938	8	1.58818		Trial 1	F5	UP	F	0:04:12.700-0:04:12.966	IT1	0.612812	8	2.29575
Trial 1	F1	P	F	0:04:12.966-0:04:13.232	IT1	0.388111	8	1.45396		Trial 1	F5	UP	F	0:04:12.966-0:04:13.232	IT1	0.591078	8	2.21432
Trial 1	F1	P	F	0:04:13.232-0:04:13.498	IT1	0.15644	8	0.586062		Trial 1	F5	UP	F	0:04:13.232-0:04:13.498	IT1	0.218866	8	0.819928
Trial 1	F1	P	F	0:04:13.498-0:04:13.764	IT1	0.139441	8	0.522381		Trial 1	F5	UP	F	0:04:13.498-0:04:13.764	IT1	0.114959	8	0.430665
Trial 1	F1	P	F	0:04:13.764-0:04:14.030	IT1	0.0786538	8	0.294656		Trial 1	F5	UP	F	0:04:13.764-0:04:14.030	IT1	0.101343	8	0.379658
Trial 1	F1	P	F	0:04:14.030-0:04:14.296	IT1	0.122014	8	0.457091		Trial 1	F5	UP	F	0:04:14.030-0:04:14.296	IT1	0.164742	8	0.617167
Trial 1	F1	P	F	0:04:14.296-0:04:14.562	IT1	0.165052	8	0.618324		Trial 1	F5	UP	F	0:04:14.296-0:04:14.562	IT1	0.0510358	8	0.191193
Trial 1	F1	P	F	0:04:14.562-0:04:14.828	IT1	0.23797	8	0.891496		Trial 1	F5	UP	F	0:04:14.562-0:04:14.828	IT1	0.0541157	8	0.20273
Trial 1	F1	P	F	0:04:14.828-0:04:15.094	IT1	0.134598	8	0.504239		Trial 1	F5	UP	F	0:04:14.828-0:04:15.094	IT1	0.0205478	8	0.0769768
Trial 1	F1	P	F	0:04:15.094-0:04:15.360	IT1	0.108614	8	0.406892		Trial 1	F5	UP	F	0:04:15.094-0:04:15.360	IT1	0.055511	8	0.207958
Trial 1	F1	P	F	0:04:15.360-0:04:15.626	IT1	0.0912763	8	0.341946		Trial 1	F5	UP	F	0:04:15.360-0:04:15.626	IT1	0.0349968	8	0.131107
Trial 1	F1	P	F	0:04:15.626-0:04:15.892	IT1	0.0532605	8	0.199526		Trial 1	F5	UP	F	0:04:15.626-0:04:15.892	IT1	0.0384137	8	0.143906
Trial 1	F1	P	F	0:04:15.892-0:04:16.158	IT1	0.0684466	8	0.256419		Trial 1	F5	UP	F	0:04:15.892-0:04:16.158	IT1	0.0422895	8	0.158428
Trial 1	F1	P	F	0:04:16.158-0:04:16.424	IT1	0.101697	8	0.380985		Trial 1	F5	UP	F	0:04:16.158-0:04:16.424	IT1	0.0395363	8	0.148113
Trial 1	F1	P	F	0:04:16.424-0:04:16.690	IT1	0.147891	7	0.633182		Trial 1	F5	UP	F	0:04:16.424-0:04:16.690	IT1	0.0470337	7	0.201371
Trial 1	F1	P	F	0:04:16.690-0:04:16.956	IT1	0.0751094	8	0.281379		Trial 1	F5	UP	F	0:04:16.690-0:04:16.956	IT1	0.0170147	8	0.0637415
Trial 1	F1	P	F	0:04:16.956-0:04:17.222	IT1	0.287147	8	1.07572		Trial 1	F5	UP	F	0:04:16.956-0:04:17.222	IT1	0.0400362	8	0.149986
Trial 1	F1	P	F	0:04:17.222-0:04:17.488	IT1	0.0574345	8	0.215164		Trial 1	F5	UP	F	0:04:17.222-0:04:17.488	IT1	0.0211651	8	0.0792896
Trial 1	F1	P	F	0:04:17.488-0:04:17.754	IT1	0.0595432	8	0.223063		Trial 1	F5	UP	F	0:04:17.488-0:04:17.754	IT1	0.0273165	8	0.102334
Trial 1	F1	P	F	0:04:17.754-0:04:18.020	IT1	0.0330863	8	0.123949		Trial 1	F5	UP	F	0:04:17.754-0:04:18.020	IT1	0.0245846	8	0.0920999
Trial 1	F1	P	F	0:04:18.020-0:04:18.286	IT1	0.0305833	8	0.114572		Trial 1	F5	UP	F	0:04:18.020-0:04:18.286	IT1	0.0200994	8	0.0752971
Trial 1	F1	P	F	0:04:18.286-0:04:18.552	IT1	0.0398739	8	0.149377		Trial 1	F5	UP	F	0:04:18.286-0:04:18.552	IT1	0.144767	8	0.542334
Trial 1	F1	P	F	0:04:18.552-0:04:18.818	IT1	0.0585115	8	0.219198		Trial 1	F5	UP	F	0:04:18.552-0:04:18.818	IT1	4.36451	8	16.3505
Trial 1	F1	P	F	0:04:18.818-0:04:19.084	IT1	0.121052	8	0.453489		Trial 1	F5	UP	F	0:04:18.818-0:04:19.084	IT1	6.13368	8	22.9783
Trial 1	F1	P	F	0:04:19.084-0:04:19.350	IT1	0.119667	8	0.448302		Trial 1	F5	UP	F	0:04:19.084-0:04:19.350	IT1	5.40151	8	20.2354
Trial 1	F1	P	F	0:04:19.350-0:04:19.616	IT1	0.128814	8	0.482568		Trial 1	F5	UP	F	0:04:19.350-0:04:19.616	IT1	5.29824	8	19.8485
Trial 1	F1	P	F	0:04:19.616-0:04:19.882	IT1	0.260271	8	0.975041		Trial 1	F5	UP	F	0:04:19.616-0:04:19.882	IT1	3.66468	8	13.7289
Trial 1	F1	P	F	0:04:19.882-0:04:20.148	IT1	0.201762	8	0.75585		Trial 1	F5	UP	F	0:04:19.882-0:04:20.148	IT1	2.059	8	7.71351
Trial 1	F1	P	F	0:04:20.148-0:04:20.414	IT1	0.106458	8	0.398819		Trial 1	F5	UP	F	0:04:20.148-0:04:20.414	IT1	0.617891	8	2.31478
Trial 1	F1	P	F	0:04:20.414-0:04:20.680	IT1	0.162236	8	0.607775		Trial 1	F5	UP	F	0:04:20.414-0:04:20.680	IT1	0.423416	8	1.58622
Trial 1	F1	P	F	0:04:20.680-0:04:20.946	IT1	0.24443	8	0.915695		Trial 1	F5	UP	F	0:04:20.680-0:04:20.946	IT1	1.11786	8	4.18775
Trial 1	F1	P	F	0:04:20.946-0:04:21.212	IT1	0.116972	8	0.438207		Trial 1	F5	UP	F	0:04:20.946-0:04:21.212	IT1	0.591123	8	2.2145
Trial 1	F1	P	F	0:04:21.212-0:04:21.478	IT1	0.0448269	8	0.167932		Trial 1	F5	UP	F	0:04:21.212-0:04:21.478	IT1	0.410641	8	1.53836
Trial 1	F1	P	F	0:04:21.478-0:04:21.744	IT1	0.0255857	8	0.0958513		Trial 1	F5	UP	F	0:04:21.478-0:04:21.744	IT1	0.342992	8	1.28494
Trial 1	F1	P	F	0:04:21.744-0:04:22.010	IT1	0.0747949	8	0.2802		Trial 1	F5	UP	F	0:04:21.744-0:04:22.010	IT1	0.892873	8	3.34491
Trial 1	F1	P	F	0:04:22.010-0:04:22.276	IT1	0.0437766	8	0.163998		Trial 1	F5	UP	F	0:04:22.010-0:04:22.276	IT1	0.540315	8	2.02416
Trial 1	F1	P	F	0:04:22.276-0:04:22.542	IT1	0.0877292	8	0.328657		Trial 1	F5	UP	F	0:04:22.276-0:04:22.542	IT1	0.459037	8	1.71966
Trial 1	F1	P	F	0:04:22.542-0:04:22.808	IT1	0.066067	8	0.247502		Trial 1	F5	UP	F	0:04:22.542-0:04:22.808	IT1	0.289667	8	1.08516
Trial 1	F1	P	F	0:04:22.808-0:04:23.074	IT1	0.27139	8	1.01669		Trial 1	F5	UP	F	0:04:22.808-0:04:23.074	IT1	0.233774	8	0.87579
Trial 1	F1	P	F	0:04:23.074-0:04:23.340	IT1	0.115245	8	0.431735		Trial 1	F5	UP	F	0:04:23.074-0:04:23.340	IT1	0.314015	8	1.17638
Trial 1	F1	P	F	0:04:23.340-0:04:23.606	IT1	0.193927	8	0.726497		Trial 1	F5	UP	F	0:04:23.340-0:04:23.606	IT1	0.070858	8	0.265451
Trial 1	F1	P	F	0:04:23.606-0:04:23.872	IT1	0.144017	8	0.539524		Trial 1	F5	UP	F	0:04:23.606-0:04:23.872	IT1	0.50938	8	1.90826
Trial 1	F1	P	F	0:04:23.872-0:04:24.138	IT1	0.0839804	8	0.314613		Trial 1	F5	UP	F	0:04:23.872-0:04:24.138	IT1	0.0938047	8	0.351415
Trial 1	F1	P	F	0:04:24.138-0:04:24.404	IT1	0.0482907	8	0.180909		Trial 1	F5	UP	F	0:04:24.138-0:04:24.404	IT1	0.205985	8	0.771669
Trial 1	F1	P	F	0:04:24.404-0:04:24.670	IT1	0.0653966	8	0.244991		Trial 1	F5	UP	F	0:04:24.404-0:04:24.670	IT1	0.0645298	8	0.241745
Trial 1	F1	P	F	0:04:24.670-0:04:24.936	IT1	0.0428985	8	0.160708		Trial 1	F5	UP	F	0:04:24.670-0:04:24.936	IT1	0.313348	8	1.17387
Trial 1	F1	P	F	0:04:24.936-0:04:25.202	IT1	0.0477736	8	0.178971		Trial 1	F5	UP	F	0:04:24.936-0:04:25.202	IT1	2.96873	8	11.1216
Trial 1	F1	P	F	0:04:25.202-0:04:25.468	IT1	0.0447549	8	0.167663		Trial 1	F5	UP	F	0:04:25.202-0:04:25.468	IT1	10.8599	8	40.6837
Trial 1	F1	P	F	0:04:25.468-0:04:25.734	IT1	0.0260247	8	0.0974951		Trial 1	F5	UP	F	0:04:25.468-0:04:25.734	IT1	11.7962	8	44.1919
Trial 1	F1	P	F	0:04:25.734-0:04:26.000	IT1	0.021351	8	0.079986		Trial 1	F5	UP	F	0:04:25.734-0:04:26.000	IT1	3.99782	8	14.9769
Trial 1	F1	P	F	0:04:26.000-0:04:26.266	IT1	0.0398389	7	0.170568		Trial 1	F5	UP	F	0:04:26.000-0:04:26.266	IT1	1.18321	7	5.06586
Trial 1	F1	P	F	0:04:26.266-0:04:26.532	IT1	0.0360367	8	0.135003		Trial 1	F5	UP	F	0:04:26.266-0:04:26.532	IT1	1.91348	8	7.16841
Trial 1	F1	P	F	0:04:26.532-0:04:26.798	IT1	0.0767013	8	0.287343		Trial 1	F5	UP	F	0:04:26.532-0:04:26.798	IT1	0.942822	8	3.53204
Trial 1	F1	P	F	0:04:26.798-0:04:27.064	IT1	0.0324056	8	0.121399		Trial 1	F5	UP	F	0:04:26.798-0:04:27.064	IT1	1.48183	8	5.5513
Trial 1	F1	P	F	0:04:27.064-0:04:27.330	IT1	0.0495116	8	0.185482		Trial 1	F5	UP	F	0:04:27.064-0:04:27.330	IT1	0.756952	8	2.83575
Trial 1	F1	P	F	0:04:27.330-0:04:27.596	IT1	0.0304225	8	0.11397		Trial 1	F5	UP	F	0:04:27.330-0:04:27.596	IT1	0.0805196	8	0.301646
Trial 1	F1	P	F	0:04:27.596-0:04:27.862	IT1	0.00628402	8	0.0235415		Trial 1	F5	UP	F	0:04:27.596-0:04:27.862	IT1	0.0951091	8	0.356304
Trial 1	F1	P	F	0:04:27.862-0:04:28.128	IT1	0.0464647	8	0.174068		Trial 1	F5	UP	F	0:04:27.862-0:04:28.128	IT1	0.100085	8	0.374944
Trial 1	F1	P	F	0:04:28.128-0:04:28.394	IT1	0.0297	8	0.111263		Trial 1	F5	UP	F	0:04:28.128-0:04:28.394	IT1	0.0233636	8	0.0875259
Trial 1	F1	P	F	0:04:28.394-0:04:28.660	IT1	0.0270253	8	0.101243		Trial 1	F5	UP	F	0:04:28.394-0:04:28.660	IT1	0.158128	8	0.592385
Trial 1	F1	P	F	0:04:28.660-0:04:28.926	IT1	0.0612486	8	0.229452		Trial 1	F5	UP	F	0:04:28.660-0:04:28.926	IT1	0.115654	8	0.433266
Trial 1	F1	P	F	0:04:28.926-0:04:29.192	IT1	0.053704	8	0.20119		Trial 1	F5	UP	F	0:04:28.926-0:04:29.192	IT1	0.0893416	8	0.334697
Trial 1	F1	P	F	0:04:29.192-0:04:29.458	IT1	0.0445167	8	0.16677		Trial 1	F5	UP	F	0:04:29.192-0:04:29.458	IT1	0.110836	8	0.415216
Trial 1	F1	P	F	0:04:29.458-0:04:29.724	IT1	0.0632359	8	0.236896		Trial 1	F5	UP	F	0:04:29.458-0:04:29.724	IT1	0.138108	8	0.517384
Trial 1	F1	P	F	0:04:29.724-0:04:29.990	IT1	0.0690533	8	0.258692		Trial 1	F5	UP	F	0:04:29.724-0:04:29.990	IT1	0.0852089	8	0.319216
Trial 1	F1	P	F	0:04:29.990-0:04:30.256	IT1	0.00785004	8	0.0294081		Trial 1	F5	UP	F	0:04:29.990-0:04:30.256	IT1	0.0852689	8	0.319437
Trial 1	F1	P	F	0:04:30.256-0:04:30.522	IT1	0.160898	8	0.602762		Trial 1	F5	UP	F	0:04:30.256-0:04:30.522	IT1	0.0991318	8	0.371372
Trial 1	F1	P	F	0:04:30.522-0:04:30.788	IT1	0.0504038	8	0.188824		Trial 1	F5	UP	F	0:04:30.522-0:04:30.788	IT1	0.0437902	8	0.16405
Trial 1	F1	P	F	0:04:30.788-0:04:31.054	IT1	0.13211	8	0.494913		Trial 1	F5	UP	F	0:04:30.788-0:04:31.054	IT1	0.177481	8	0.664885
Trial 1	F1	P	F	0:04:31.054-0:04:31.320	IT1	0.0214927	8	0.0805173		Trial 1	F5	UP	F	0:04:31.054-0:04:31.320	IT1	0.158067	8	0.592159
Trial 1	F1	P	F	0:04:31.320-0:04:31.586	IT1	0.106201	8	0.397856		Trial 1	F5	UP	F	0:04:31.320-0:04:31.586	IT1	0.205992	8	0.771695
Trial 1	F1	P	F	0:04:31.586-0:04:31.852	IT1	0.0521682	8	0.195435		Trial 1	F5	UP	F	0:04:31.586-0:04:31.852	IT1	0.167081	8	0.625929
Trial 1	F1	P	F	0:04:31.852-0:04:32.118	IT1	0.0675055	8	0.252894		Trial 1	F5	UP	F	0:04:31.852-0:04:32.118	IT1	0.164333	8	0.615632
Trial 1	F1	P	F	0:04:32.118-0:04:32.384	IT1	0.0578091	8	0.216567		Trial 1	F5	UP	F	0:04:32.118-0:04:32.384	IT1	0.0718837	8	0.269296
Trial 1	F1	P	F	0:04:32.384-0:04:32.650	IT1	0.00721922	8	0.0270451		Trial 1	F5	UP	F	0:04:32.384-0:04:32.650	IT1	0.0975171	8	0.365323
Trial 1	F1	P	F	0:04:32.650-0:04:32.916	IT1	0.0981781	8	0.367797		Trial 1	F5	UP	F	0:04:32.650-0:04:32.916	IT1	0.208314	8	0.780392
Trial 1	F1	P	F	0:04:32.916-0:04:33.182	IT1	0.117518	8	0.44025		Trial 1	F5	UP	F	0:04:32.916-0:04:33.182	IT1	0.0748911	8	0.28056
Trial 1	F1	P	F	0:04:33.182-0:04:33.448	IT1	0.11497	8	0.430707		Trial 1	F5	UP	F	0:04:33.182-0:04:33.448	IT1	0.173366	8	0.649468
Trial 1	F1	P	F	0:04:33.448-0:04:33.714	IT1	0.12628	8	0.473075		Trial 1	F5	UP	F	0:04:33.448-0:04:33.714	IT1	0.0548775	8	0.205585
Trial 1	F1	P	F	0:04:33.714-0:04:33.980	IT1	0.154319	8	0.578119		Trial 1	F5	UP	F	0:04:33.714-0:04:33.980	IT1	0.142808	8	0.534991
Trial 1	F1	P	F	0:04:33.980-0:04:34.246	IT1	0.125389	8	0.469736		Trial 1	F5	UP	F	0:04:33.980-0:04:34.246	IT1	0.0800815	8	0.300006
Trial 1	F1	P	F	0:04:34.246-0:04:34.512	IT1	0.33049	8	1.2381		Trial 1	F5	UP	F	0:04:34.246-0:04:34.512	IT1	0.0752677	8	0.281973
Trial 1	F1	P	F	0:04:34.512-0:04:34.778	IT1	0.746562	8	2.7968		Trial 1	F5	UP	F	0:04:34.512-0:04:34.778	IT1	0.0659039	8	0.24689
Trial 1	F1	P	F	0:04:34.778-0:04:35.044	IT1	0.652724	8	2.44526		Trial 1	F5	UP	F	0:04:34.778-0:04:35.044	IT1	0.0924642	8	0.346394
Trial 1	F1	P	F	0:04:35.044-0:04:35.310	IT1	0.455003	8	1.70455		Trial 1	F5	UP	F	0:04:35.044-0:04:35.310	IT1	0.229623	8	0.860227
Trial 1	F1	P	F	0:04:35.310-0:04:35.576	IT1	0.57412	8	2.15079		Trial 1	F5	UP	F	0:04:35.310-0:04:35.576	IT1	0.0887452	8	0.332461
Trial 1	F1	P	F	0:04:35.576-0:04:35.842	IT1	0.353462	7	1.51332		Trial 1	F5	UP	F	0:04:35.576-0:04:35.842	IT1	0.247376	7	1.05912
Trial 1	F1	P	F	0:04:35.842-0:04:36.108	IT1	0.597083	8	2.23683		Trial 1	F5	UP	F	0:04:35.842-0:04:36.108	IT1	0.0412923	8	0.154691
Trial 1	F1	P	F	0:04:36.108-0:04:36.374	IT1	0.246357	8	0.922912		Trial 1	F5	UP	F	0:04:36.108-0:04:36.374	IT1	0.0576304	8	0.215897
Trial 1	F1	P	F	0:04:36.374-0:04:36.640	IT1	0.0756621	8	0.283448		Trial 1	F5	UP	F	0:04:36.374-0:04:36.640	IT1	0.0677993	8	0.253993
Trial 1	F1	P	F	0:04:36.640-0:04:36.906	IT1	0.202306	8	0.757889		Trial 1	F5	UP	F	0:04:36.640-0:04:36.906	IT1	0.0510512	8	0.191249
Trial 1	F1	P	F	0:04:36.906-0:04:37.172	IT1	0.17099	8	0.64057		Trial 1	F5	UP	F	0:04:36.906-0:04:37.172	IT1	0.0924553	8	0.346362
Trial 1	F1	P	F	0:04:37.172-0:04:37.438	IT1	0.101376	8	0.379779		Trial 1	F5	UP	F	0:04:37.172-0:04:37.438	IT1	0.0513373	8	0.192324
Trial 1	F1	P	F	0:04:37.438-0:04:37.704	IT1	0.130839	8	0.490152		Trial 1	F5	UP	F	0:04:37.438-0:04:37.704	IT1	0.155985	8	0.584357
Trial 1	F1	P	F	0:04:37.704-0:04:37.970	IT1	0.0586047	8	0.219549		Trial 1	F5	UP	F	0:04:37.704-0:04:37.970	IT1	0.0764827	8	0.286523
Trial 1	F1	P	F	0:04:37.970-0:04:38.236	IT1	0.053465	8	0.200295		Trial 1	F5	UP	F	0:04:37.970-0:04:38.236	IT1	0.370818	8	1.38918
Trial 1	F1	P	F	0:04:38.236-0:04:38.502	IT1	0.0814385	8	0.305088		Trial 1	F5	UP	F	0:04:38.236-0:04:38.502	IT1	2.45356	8	9.19165
Trial 1	F1	P	F	0:04:38.502-0:04:38.768	IT1	0.130083	8	0.487322		Trial 1	F5	UP	F	0:04:38.502-0:04:38.768	IT1	3.37729	8	12.6522
Trial 1	F1	P	F	0:04:38.768-0:04:39.034	IT1	0.0685246	8	0.25671		Trial 1	F5	UP	F	0:04:38.768-0:04:39.034	IT1	1.36737	8	5.12249
Trial 1	F1	P	F	0:04:39.034-0:04:39.300	IT1	0.0696797	8	0.261037		Trial 1	F5	UP	F	0:04:39.034-0:04:39.300	IT1	2.5728	8	9.63831
Trial 1	F1	P	F	0:04:39.300-0:04:39.566	IT1	0.0524992	8	0.196676		Trial 1	F5	UP	F	0:04:39.300-0:04:39.566	IT1	1.53483	8	5.74985
Trial 1	F1	P	F	0:04:39.566-0:04:39.832	IT1	0.0384382	8	0.143999		Trial 1	F5	UP	F	0:04:39.566-0:04:39.832	IT1	0.992581	8	3.71845
Trial 1	F1	P	F	0:04:39.832-0:04:40.098	IT1	0.144368	8	0.540837		Trial 1	F5	UP	F	0:04:39.832-0:04:40.098	IT1	0.512815	8	1.92114
Trial 1	F1	P	F	0:04:40.098-0:04:40.364	IT1	0.124921	8	0.467984		Trial 1	F5	UP	F	0:04:40.098-0:04:40.364	IT1	0.254262	8	0.952525
Trial 1	F1	P	F	0:04:40.364-0:04:40.630	IT1	0.101513	8	0.380293		Trial 1	F5	UP	F	0:04:40.364-0:04:40.630	IT1	0.704298	8	2.63847
Trial 1	F1	P	F	0:04:40.630-0:04:40.896	IT1	0.0872419	8	0.326829		Trial 1	F5	UP	F	0:04:40.630-0:04:40.896	IT1	1.03796	8	3.88848
Trial 1	F1	P	F	0:04:40.896-0:04:41.162	IT1	0.0487515	8	0.182635		Trial 1	F5	UP	F	0:04:40.896-0:04:41.162	IT1	0.60987	8	2.28472
Trial 1	F1	P	F	0:04:41.162-0:04:41.428	IT1	0.21505	8	0.805632		Trial 1	F5	UP	F	0:04:41.162-0:04:41.428	IT1	1.89245	8	7.0896
Trial 1	F1	P	F	0:04:41.428-0:04:41.694	IT1	0.365087	8	1.3677		Trial 1	F5	UP	F	0:04:41.428-0:04:41.694	IT1	2.68496	8	10.0585
Trial 1	F1	P	F	0:04:41.694-0:04:41.960	IT1	0.281305	8	1.05384		Trial 1	F5	UP	F	0:04:41.694-0:04:41.960	IT1	0.321233	8	1.20341
Trial 1	F1	P	F	0:04:41.960-0:04:42.226	IT1	0.235319	8	0.881563		Trial 1	F5	UP	F	0:04:41.960-0:04:42.226	IT1	0.499624	8	1.87172
Trial 1	F1	P	F	0:04:42.226-0:04:42.492	IT1	0.274493	8	1.02832		Trial 1	F5	UP	F	0:04:42.226-0:04:42.492	IT1	0.3489	8	1.30707
Trial 1	F1	P	F	0:04:42.492-0:04:42.758	IT1	0.196107	8	0.734669		Trial 1	F5	UP	F	0:04:42.492-0:04:42.758	IT1	0.556537	8	2.08493
Trial 1	F1	P	F	0:04:42.758-0:04:43.024	IT1	0.328947	8	1.23231		Trial 1	F5	UP	F	0:04:42.758-0:04:43.024	IT1	0.488463	8	1.8299
Trial 1	F1	P	F	0:04:43.024-0:04:43.290	IT1	0.404899	8	1.51686		Trial 1	F5	UP	F	0:04:43.024-0:04:43.290	IT1	1.05162	8	3.93963
Trial 1	F1	P	F	0:04:43.290-0:04:43.556	IT1	0.151247	8	0.566611		Trial 1	F5	UP	F	0:04:43.290-0:04:43.556	IT1	2.49313	8	9.33992
Trial 1	F1	P	F	0:04:43.556-0:04:43.822	IT1	0.174949	8	0.655402		Trial 1	F5	UP	F	0:04:43.556-0:04:43.822	IT1	2.85456	8	10.6939
Trial 1	F1	P	F	0:04:43.822-0:04:44.088	IT1	0.0961393	8	0.360164		Trial 1	F5	UP	F	0:04:43.822-0:04:44.088	IT1	2.40884	8	9.02414
Trial 1	F1	P	F	0:04:44.088-0:04:44.354	IT1	0.111685	8	0.4184		Trial 1	F5	UP	F	0:04:44.088-0:04:44.354	IT1	0.812424	8	3.04353
Trial 1	F1	P	F	0:04:44.354-0:04:44.620	IT1	0.110579	8	0.414257		Trial 1	F5	UP	F	0:04:44.354-0:04:44.620	IT1	0.214764	8	0.804556
Trial 1	F1	P	F	0:04:44.620-0:04:44.886	IT1	0.311761	8	1.16793		Trial 1	F5	UP	F	0:04:44.620-0:04:44.886	IT1	0.20847	8	0.780983
Trial 1	F1	P	F	0:04:44.886-0:04:45.152	IT1	0.283893	8	1.06353		Trial 1	F5	UP	F	0:04:44.886-0:04:45.152	IT1	0.120725	8	0.452266
Trial 1	F1	P	F	0:04:45.152-0:04:45.418	IT1	0.158969	7	0.680615		Trial 1	F5	UP	F	0:04:45.152-0:04:45.418	IT1	0.103092	7	0.44138
Trial 1	F1	P	F	0:04:45.418-0:04:45.684	IT1	0.275939	8	1.03374		Trial 1	F5	UP	F	0:04:45.418-0:04:45.684	IT1	0.144783	8	0.542397
Trial 1	F1	P	F	0:04:45.684-0:04:45.950	IT1	0.195462	8	0.732244		Trial 1	F5	UP	F	0:04:45.684-0:04:45.950	IT1	0.407636	8	1.5271
Trial 1	F1	P	F	0:04:45.950-0:04:46.216	IT1	0.138516	8	0.518915		Trial 1	F5	UP	F	0:04:45.950-0:04:46.216	IT1	0.683074	8	2.55896
Trial 1	F1	P	F	0:04:46.216-0:04:46.482	IT1	0.0344109	8	0.128911		Trial 1	F5	UP	F	0:04:46.216-0:04:46.482	IT1	0.255832	8	0.958406
Trial 1	F1	P	F	0:04:46.482-0:04:46.748	IT1	0.213847	8	0.801126		Trial 1	F5	UP	F	0:04:46.482-0:04:46.748	IT1	0.242442	8	0.908246
Trial 1	F1	P	F	0:04:46.748-0:04:47.014	IT1	0.0598565	8	0.224238		Trial 1	F5	UP	F	0:04:46.748-0:04:47.014	IT1	0.364659	8	1.36611
Trial 1	F1	P	F	0:04:47.014-0:04:47.280	IT1	0.197392	8	0.739484		Trial 1	F5	UP	F	0:04:47.014-0:04:47.280	IT1	0.295326	8	1.10637
Trial 1	F1	P	F	0:04:47.280-0:04:47.546	IT1	0.05942	8	0.222603		Trial 1	F5	UP	F	0:04:47.280-0:04:47.546	IT1	0.279961	8	1.04881
Trial 1	F1	P	F	0:04:47.546-0:04:47.812	IT1	0.102114	8	0.382548		Trial 1	F5	UP	F	0:04:47.546-0:04:47.812	IT1	0.466627	8	1.7481
Trial 1	F1	P	F	0:04:47.812-0:04:48.078	IT1	0.0247954	8	0.0928896		Trial 1	F5	UP	F	0:04:47.812-0:04:48.078	IT1	0.861143	8	3.22605
Trial 1	F1	P	F	0:04:48.078-0:04:48.344	IT1	0.217914	8	0.816358		Trial 1	F5	UP	F	0:04:48.078-0:04:48.344	IT1	0.407832	8	1.52785
Trial 1	F1	P	F	0:04:48.344-0:04:48.610	IT1	0.0806698	8	0.302208		Trial 1	F5	UP	F	0:04:48.344-0:04:48.610	IT1	0.379068	8	1.42008
Trial 1	F1	P	F	0:04:48.610-0:04:48.876	IT1	0.0492669	8	0.184567		Trial 1	F5	UP	F	0:04:48.610-0:04:48.876	IT1	0.387094	8	1.45015
Trial 1	F1	P	F	0:04:48.876-0:04:49.142	IT1	0.0754211	8	0.282546		Trial 1	F5	UP	F	0:04:48.876-0:04:49.142	IT1	0.687073	8	2.57394
Trial 1	F1	P	F	0:04:49.142-0:04:49.408	IT1	0.0205715	8	0.0770656		Trial 1	F5	UP	F	0:04:49.142-0:04:49.408	IT1	0.474145	8	1.77626
Trial 1	F1	P	F	0:04:49.408-0:04:49.674	IT1	0.110485	8	0.413906		Trial 1	F5	UP	F	0:04:49.408-0:04:49.674	IT1	0.124103	8	0.464923
Trial 1	F1	P	F	0:04:49.674-0:04:49.940	IT1	0.157347	8	0.589461		Trial 1	F5	UP	F	0:04:49.674-0:04:49.940	IT1	0.179748	8	0.673381
Trial 1	F1	P	F	0:04:49.940-0:04:50.206	IT1	0.0918896	8	0.344242		Trial 1	F5	UP	F	0:04:49.940-0:04:50.206	IT1	0.084835	8	0.317814
Trial 1	F1	P	F	0:04:50.206-0:04:50.472	IT1	0.0414698	8	0.155356		Trial 1	F5	UP	F	0:04:50.206-0:04:50.472	IT1	0.992444	8	3.71794
Trial 1	F1	P	F	0:04:50.472-0:04:50.738	IT1	0.104004	8	0.389622		Trial 1	F5	UP	F	0:04:50.472-0:04:50.738	IT1	0.414476	8	1.55273
Trial 1	F1	P	F	0:04:50.738-0:04:51.004	IT1	0.145582	8	0.545388		Trial 1	F5	UP	F	0:04:50.738-0:04:51.004	IT1	0.865925	8	3.24398
Trial 1	F1	P	F	0:04:51.004-0:04:51.270	IT1	0.0555565	8	0.208129		Trial 1	F5	UP	F	0:04:51.004-0:04:51.270	IT1	2.84822	8	10.6702
Trial 1	F1	P	F	0:04:51.270-0:04:51.536	IT1	0.156929	8	0.587894		Trial 1	F5	UP	F	0:04:51.270-0:04:51.536	IT1	4.07607	8	15.27
Trial 1	F1	P	F	0:04:51.536-0:04:51.802	IT1	0.0260425	8	0.0975613		Trial 1	F5	UP	F	0:04:51.536-0:04:51.802	IT1	1.77563	8	6.65193
Trial 1	F1	P	F	0:04:51.802-0:04:52.068	IT1	0.159739	8	0.598418		Trial 1	F5	UP	F	0:04:51.802-0:04:52.068	IT1	1.05296	8	3.94465
Trial 1	F1	P	F	0:04:52.068-0:04:52.334	IT1	0.0989395	8	0.370654		Trial 1	F5	UP	F	0:04:52.068-0:04:52.334	IT1	0.836796	8	3.13485
Trial 1	F1	P	F	0:04:52.334-0:04:52.600	IT1	0.150057	8	0.56215		Trial 1	F5	UP	F	0:04:52.334-0:04:52.600	IT1	1.27605	8	4.7804
Trial 1	F1	P	F	0:04:52.600-0:04:52.866	IT1	0.0867129	8	0.324848		Trial 1	F5	UP	F	0:04:52.600-0:04:52.866	IT1	2.93322	8	10.9886
Trial 1	F1	P	F	0:04:52.866-0:04:53.132	IT1	0.0467121	8	0.174997		Trial 1	F5	UP	F	0:04:52.866-0:04:53.132	IT1	1.08501	8	4.0647
Trial 1	F1	P	F	0:04:53.132-0:04:53.398	IT1	0.143896	8	0.53907		Trial 1	F5	UP	F	0:04:53.132-0:04:53.398	IT1	1.84102	8	6.89689
Trial 1	F1	P	F	0:04:53.398-0:04:53.664	IT1	0.0239756	8	0.0898196		Trial 1	F5	UP	F	0:04:53.398-0:04:53.664	IT1	1.49474	8	5.59972
Trial 1	F1	P	F	0:04:53.664-0:04:53.930	IT1	0.0628212	8	0.235344		Trial 1	F5	UP	F	0:04:53.664-0:04:53.930	IT1	1.30341	8	4.88287
Trial 1	F1	P	F	0:04:53.930-0:04:54.196	IT1	0.0588159	8	0.22034		Trial 1	F5	UP	F	0:04:53.930-0:04:54.196	IT1	1.24401	8	4.66038
Trial 1	F1	P	F	0:04:54.196-0:04:54.462	IT1	0.0488003	8	0.182817		Trial 1	F5	UP	F	0:04:54.196-0:04:54.462	IT1	0.797627	8	2.9881
Trial 1	F1	P	F	0:04:54.462-0:04:54.728	IT1	0.0395533	7	0.169346		Trial 1	F5	UP	F	0:04:54.462-0:04:54.728	IT1	0.373301	7	1.59826
Trial 1	F1	P	F	0:04:54.728-0:04:54.994	IT1	0.0558234	8	0.209127		Trial 1	F5	UP	F	0:04:54.728-0:04:54.994	IT1	0.132719	8	0.497197
Trial 1	F1	P	F	0:04:54.994-0:04:55.260	IT1	0.0464958	8	0.174186		Trial 1	F5	UP	F	0:04:54.994-0:04:55.260	IT1	0.339399	8	1.27147
Trial 1	F1	P	F	0:04:55.260-0:04:55.526	IT1	0.0586515	8	0.219722		Trial 1	F5	UP	F	0:04:55.260-0:04:55.526	IT1	1.00732	8	3.77367
Trial 1	F1	P	F	0:04:55.526-0:04:55.792	IT1	0.161501	8	0.605021		Trial 1	F5	UP	F	0:04:55.526-0:04:55.792	IT1	0.725495	8	2.7179
Trial 1	F1	P	F	0:04:55.792-0:04:56.058	IT1	0.0523778	8	0.19622		Trial 1	F5	UP	F	0:04:55.792-0:04:56.058	IT1	1.49817	8	5.61254
Trial 1	F1	P	F	0:04:56.058-0:04:56.324	IT1	0.0705155	8	0.264168		Trial 1	F5	UP	F	0:04:56.058-0:04:56.324	IT1	0.982486	8	3.68065
Trial 1	F1	P	F	0:04:56.324-0:04:56.590	IT1	0.0355676	8	0.133246		Trial 1	F5	UP	F	0:04:56.324-0:04:56.590	IT1	0.914206	8	3.42484
Trial 1	F1	P	F	0:04:56.590-0:04:56.856	IT1	0.0638928	8	0.239358		Trial 1	F5	UP	F	0:04:56.590-0:04:56.856	IT1	0.949737	8	3.55795
Trial 1	F1	P	F	0:04:56.856-0:04:57.122	IT1	0.15891	8	0.595315		Trial 1	F5	UP	F	0:04:56.856-0:04:57.122	IT1	0.93622	8	3.50734
Trial 1	F1	P	F	0:04:57.122-0:04:57.388	IT1	0.0425926	8	0.159562		Trial 1	F5	UP	F	0:04:57.122-0:04:57.388	IT1	0.637893	8	2.3897
Trial 1	F1	P	F	0:04:57.388-0:04:57.654	IT1	0.0347866	8	0.130319		Trial 1	F5	UP	F	0:04:57.388-0:04:57.654	IT1	3.21905	8	12.0594
Trial 1	F1	P	F	0:04:57.654-0:04:57.920	IT1	0.0715523	8	0.268052		Trial 1	F5	UP	F	0:04:57.654-0:04:57.920	IT1	2.85348	8	10.6899
Trial 1	F1	P	F	0:04:57.920-0:04:58.186	IT1	0.112026	8	0.419679		Trial 1	F5	UP	F	0:04:57.920-0:04:58.186	IT1	2.38558	8	8.937
Trial 1	F1	P	F	0:04:58.186-0:04:58.452	IT1	0.0310486	8	0.116315		Trial 1	F5	UP	F	0:04:58.186-0:04:58.452	IT1	0.757421	8	2.83749
Trial 1	F1	P	F	0:04:58.452-0:04:58.718	IT1	0.138902	8	0.520358		Trial 1	F5	UP	F	0:04:58.452-0:04:58.718	IT1	0.779052	8	2.91852
Trial 1	F1	P	F	0:04:58.718-0:04:58.984	IT1	0.253868	8	0.951048		Trial 1	F5	UP	F	0:04:58.718-0:04:58.984	IT1	0.48917	8	1.83255
Trial 1	F1	P	F	0:04:58.984-0:04:59.250	IT1	0.199952	8	0.74907		Trial 1	F5	UP	F	0:04:58.984-0:04:59.250	IT1	0.366302	8	1.37226
Trial 1	F1	P	F	0:04:59.250-0:04:59.516	IT1	0.316339	8	1.18509		Trial 1	F5	UP	F	0:04:59.250-0:04:59.516	IT1	0.520569	8	1.95017
Trial 1	F1	P	F	0:04:59.516-0:04:59.782	IT1	0.115957	8	0.434406		Trial 1	F5	UP	F	0:04:59.516-0:04:59.782	IT1	0.906348	8	3.3954
Trial 1	F1	P	F	0:04:59.782-0:05:00.048	IT1	0.224302	8	0.840287		Trial 1	F5	UP	F	0:04:59.782-0:05:00.048	IT1	3.57151	8	13.3797
Trial 1	F1	P	F	0:05:00.048-0:05:00.314	IT1	0.18275	8	0.684624		Trial 1	F5	UP	F	0:05:00.048-0:05:00.314	IT1	4.77403	8	17.8847
Trial 1	F1	P	F	0:05:00.314-0:05:00.580	IT1	0.117052	8	0.438506		Trial 1	F5	UP	F	0:05:00.314-0:05:00.580	IT1	4.34003	8	16.2589
Trial 1	F1	P	F	0:05:00.580-0:05:00.846	IT1	0.113947	8	0.426875		Trial 1	F5	UP	F	0:05:00.580-0:05:00.846	IT1	4.72409	8	17.6976
Trial 1	F1	P	F	0:05:00.846-0:05:01.112	IT1	0.163577	8	0.612806		Trial 1	F5	UP	F	0:05:00.846-0:05:01.112	IT1	3.7927	8	14.2084
Trial 1	F1	P	F	0:05:01.112-0:05:01.378	IT1	0.0551896	8	0.206753		Trial 1	F5	UP	F	0:05:01.112-0:05:01.378	IT1	2.42846	8	9.09759
Trial 1	F1	P	F	0:05:01.378-0:05:01.644	IT1	0.220732	8	0.826915		Trial 1	F5	UP	F	0:05:01.378-0:05:01.644	IT1	0.850898	8	3.18767
Trial 1	F1	P	F	0:05:01.644-0:05:01.910	IT1	0.133745	8	0.501045		Trial 1	F5	UP	F	0:05:01.644-0:05:01.910	IT1	0.61505	8	2.30414
Trial 1	F1	P	F	0:05:01.910-0:05:02.176	IT1	0.11589	8	0.434152		Trial 1	F5	UP	F	0:05:01.910-0:05:02.176	IT1	1.8162	8	6.80394
Trial 1	F1	P	F	0:05:02.176-0:05:02.442	IT1	0.0401572	8	0.150439		Trial 1	F5	UP	F	0:05:02.176-0:05:02.442	IT1	1.1998	8	4.49477
Trial 1	F1	P	F	0:05:02.442-0:05:02.708	IT1	0.10194	8	0.381893		Trial 1	F5	UP	F	0:05:02.442-0:05:02.708	IT1	0.730844	8	2.73792
Trial 1	F1	P	F	0:05:02.708-0:05:02.974	IT1	0.018606	8	0.0697031		Trial 1	F5	UP	F	0:05:02.708-0:05:02.974	IT1	0.391444	8	1.46645
Trial 1	F1	P	F	0:05:02.974-0:05:03.240	IT1	0.00923036	8	0.0345793		Trial 1	F5	UP	F	0:05:02.974-0:05:03.240	IT1	0.0736061	8	0.275747
Trial 1	F1	P	F	0:05:03.240-0:05:03.506	IT1	0.102323	8	0.383325		Trial 1	F5	UP	F	0:05:03.240-0:05:03.506	IT1	0.344031	8	1.28882
Trial 1	F1	P	F	0:05:03.506-0:05:03.772	IT1	0.110273	8	0.41311		Trial 1	F5	UP	F	0:05:03.506-0:05:03.772	IT1	0.881949	8	3.30399
Trial 1	F1	P	F	0:05:03.772-0:05:04.038	IT1	0.094494	8	0.353998		Trial 1	F5	UP	F	0:05:03.772-0:05:04.038	IT1	2.1257	8	7.96338
Trial 1	F1	P	F	0:05:04.038-0:05:04.304	IT1	0.29521	7	1.26391		Trial 1	F5	UP	F	0:05:04.038-0:05:04.304	IT1	0.490893	7	2.10173
Trial 1	F1	P	F	0:05:04.304-0:05:04.570	IT1	0.440496	8	1.65022		Trial 1	F5	UP	F	0:05:04.304-0:05:04.570	IT1	0.795791	8	2.98124
Trial 1	F1	P	F	0:05:04.570-0:05:04.836	IT1	0.415891	8	1.55803		Trial 1	F5	UP	F	0:05:04.570-0:05:04.836	IT1	0.831874	8	3.11639
Trial 1	F1	P	F	0:05:04.836-0:05:05.102	IT1	0.347026	8	1.30004		Trial 1	F5	UP	F	0:05:04.836-0:05:05.102	IT1	0.344937	8	1.29222
Trial 1	F1	P	F	0:05:05.102-0:05:05.368	IT1	0.203621	8	0.762821		Trial 1	F5	UP	F	0:05:05.102-0:05:05.368	IT1	0.383591	8	1.43703
Trial 1	F1	P	F	0:05:05.368-0:05:05.634	IT1	0.0876671	8	0.328423		Trial 1	F5	UP	F	0:05:05.368-0:05:05.634	IT1	0.105383	8	0.394791
[truncated: 97,995 more rows]

## Sheet: Day 3
Raw velocity data, extracted via ethovision, which is fed to R source code 1 to detect and extract darts, and to produce velocity traces
[truncated: 51,620 more rows]
