# Supplementary material for: Conditional and unconditional components of aversively motivated freezing, flight and darting in mice
Source: eLife. 2022 May 26;11:e75663. doi: 10.7554/eLife.75663 (PMC9173745; doi:10.7554/eLife.75663)
Supplement: Figure 7—source data 1. [file elife-75663-fig7-data1.xlsx]

## Sheet: Sheet1
Raw velocity data, extracted via ethovision, which is fed to R source code 1 to detect and extract darts, and to produce velocity traces
Showing Data from Test Day 3 for all animals in Experiment 3
Used to calculate Darts/minute as seen in Figure 6
Used to produce velocity traces as seen in Figure 7
Trial	Animal	Group	Sex	TimeStamp	StimPeriod	Distance_cm	Samples	Velocity
Trial 1	F1	P	F	Start-0:00:00.266	BL	0.721308	7	3.08824
Trial 1	F1	P	F	0:00:00.266-0:00:00.532	BL	0.384624	8	1.44089
Trial 1	F1	P	F	0:00:00.532-0:00:00.798	BL	0.0492123	8	0.184361
Trial 1	F1	P	F	0:00:00.798-0:00:01.064	BL	0.0492123	8	0.184362
Trial 1	F1	P	F	0:00:01.064-0:00:01.330	BL	0.0492123	8	0.184361
Trial 1	F1	P	F	0:00:01.330-0:00:01.596	BL	0.0492123	8	0.184362
Trial 1	F1	P	F	0:00:01.596-0:00:01.862	BL	0.0492123	8	0.184361
Trial 1	F1	P	F	0:00:01.862-0:00:02.128	BL	0.0492123	8	0.184361
Trial 1	F1	P	F	0:00:02.128-0:00:02.394	BL	0.0492123	8	0.184362
Trial 1	F1	P	F	0:00:02.394-0:00:02.660	BL	0.0492123	8	0.184361
Trial 1	F1	P	F	0:00:02.660-0:00:02.926	BL	0.0492123	8	0.184362
Trial 1	F1	P	F	0:00:02.926-0:00:03.192	BL	0.0492123	8	0.184361
Trial 1	F1	P	F	0:00:03.192-0:00:03.458	BL	0.0492123	8	0.184361
Trial 1	F1	P	F	0:00:03.458-0:00:03.724	BL	0.0492123	8	0.184362
Trial 1	F1	P	F	0:00:03.724-0:00:03.990	BL	0.0492123	8	0.184361
Trial 1	F1	P	F	0:00:03.990-0:00:04.256	BL	0.0492123	8	0.184362
Trial 1	F1	P	F	0:00:04.256-0:00:04.522	BL	0.0492123	8	0.184361
Trial 1	F1	P	F	0:00:04.522-0:00:04.788	BL	0.0492123	8	0.184361
Trial 1	F1	P	F	0:00:04.788-0:00:05.054	BL	0.0492123	8	0.184362
Trial 1	F1	P	F	0:00:05.054-0:00:05.320	BL	0.0492123	8	0.184361
Trial 1	F1	P	F	0:00:05.320-0:00:05.586	BL	0.0492123	8	0.184362
Trial 1	F1	P	F	0:00:05.586-0:00:05.852	BL	0.0492123	8	0.184361
Trial 1	F1	P	F	0:00:05.852-0:00:06.118	BL	0.0492123	8	0.184361
Trial 1	F1	P	F	0:00:06.118-0:00:06.384	BL	0.0492123	8	0.184362
Trial 1	F1	P	F	0:00:06.384-0:00:06.650	BL	0.0492123	8	0.184361
Trial 1	F1	P	F	0:00:06.650-0:00:06.916	BL	0.0492123	8	0.184362
Trial 1	F1	P	F	0:00:06.916-0:00:07.182	BL	0.0492123	8	0.184361
Trial 1	F1	P	F	0:00:07.182-0:00:07.448	BL	0.0492123	8	0.184361
Trial 1	F1	P	F	0:00:07.448-0:00:07.714	BL	0.0492123	8	0.184362
Trial 1	F1	P	F	0:00:07.714-0:00:07.980	BL	0.0492123	8	0.184361
Trial 1	F1	P	F	0:00:07.980-0:00:08.246	BL	0.0492123	8	0.184362
Trial 1	F1	P	F	0:00:08.246-0:00:08.512	BL	0.0492123	8	0.184361
Trial 1	F1	P	F	0:00:08.512-0:00:08.778	BL	0.0492123	8	0.184361
Trial 1	F1	P	F	0:00:08.778-0:00:09.044	BL	0.0492123	8	0.184362
Trial 1	F1	P	F	0:00:09.044-0:00:09.310	BL	0.0492123	8	0.184361
Trial 1	F1	P	F	0:00:09.310-0:00:09.576	BL	0.0430608	7	0.184362
Trial 1	F1	P	F	0:00:09.576-0:00:09.842	BL	0.0492123	8	0.184362
Trial 1	F1	P	F	0:00:09.842-0:00:10.108	BL	0.0492123	8	0.184361
Trial 1	F1	P	F	0:00:10.108-0:00:10.374	BL	0.0492123	8	0.184361
Trial 1	F1	P	F	0:00:10.374-0:00:10.640	BL	0.0492123	8	0.184362
Trial 1	F1	P	F	0:00:10.640-0:00:10.906	BL	0.0492123	8	0.184361
Trial 1	F1	P	F	0:00:10.906-0:00:11.172	BL	0.0492123	8	0.184362
Trial 1	F1	P	F	0:00:11.172-0:00:11.438	BL	0.0492123	8	0.184361
Trial 1	F1	P	F	0:00:11.438-0:00:11.704	BL	0.0492123	8	0.184361
Trial 1	F1	P	F	0:00:11.704-0:00:11.970	BL	0.0492123	8	0.184362
Trial 1	F1	P	F	0:00:11.970-0:00:12.236	BL	0.251024	8	0.9404
Trial 1	F1	P	F	0:00:12.236-0:00:12.502	BL	0.285977	8	1.07134
Trial 1	F1	P	F	0:00:12.502-0:00:12.768	BL	0.00316227	8	0.0118466
Trial 1	F1	P	F	0:00:12.768-0:00:13.034	BL	0.00316227	8	0.0118466
Trial 1	F1	P	F	0:00:13.034-0:00:13.300	BL	0.00316227	8	0.0118467
Trial 1	F1	P	F	0:00:13.300-0:00:13.566	BL	0.00316227	8	0.0118466
Trial 1	F1	P	F	0:00:13.566-0:00:13.832	BL	0.00316227	8	0.0118467
Trial 1	F1	P	F	0:00:13.832-0:00:14.098	BL	0.00316227	8	0.0118466
Trial 1	F1	P	F	0:00:14.098-0:00:14.364	BL	0.00316227	8	0.0118466
Trial 1	F1	P	F	0:00:14.364-0:00:14.630	BL	0.00316227	8	0.0118467
Trial 1	F1	P	F	0:00:14.630-0:00:14.896	BL	0.00316227	8	0.0118466
Trial 1	F1	P	F	0:00:14.896-0:00:15.162	BL	0.00316227	8	0.0118467
Trial 1	F1	P	F	0:00:15.162-0:00:15.428	BL	0.00316227	8	0.0118466
Trial 1	F1	P	F	0:00:15.428-0:00:15.694	BL	0.00316227	8	0.0118466
Trial 1	F1	P	F	0:00:15.694-0:00:15.960	BL	0.00316227	8	0.0118467
Trial 1	F1	P	F	0:00:15.960-0:00:16.226	BL	0.00316227	8	0.0118466
Trial 1	F1	P	F	0:00:16.226-0:00:16.492	BL	0.00316227	8	0.0118467
Trial 1	F1	P	F	0:00:16.492-0:00:16.758	BL	0.00316227	8	0.0118466
Trial 1	F1	P	F	0:00:16.758-0:00:17.024	BL	0.00316227	8	0.0118466
Trial 1	F1	P	F	0:00:17.024-0:00:17.290	BL	0.00316227	8	0.0118467
Trial 1	F1	P	F	0:00:17.290-0:00:17.556	BL	0.00316227	8	0.0118466
Trial 1	F1	P	F	0:00:17.556-0:00:17.822	BL	0.00316227	8	0.0118467
Trial 1	F1	P	F	0:00:17.822-0:00:18.088	BL	0.00316227	8	0.0118466
Trial 1	F1	P	F	0:00:18.088-0:00:18.354	BL	0.00316227	8	0.0118466
Trial 1	F1	P	F	0:00:18.354-0:00:18.620	BL	0.00316227	8	0.0118467
Trial 1	F1	P	F	0:00:18.620-0:00:18.886	BL	0.00316227	8	0.0118466
Trial 1	F1	P	F	0:00:18.886-0:00:19.152	BL	0.00276698	7	0.0118466
Trial 1	F1	P	F	0:00:19.152-0:00:19.418	BL	0.00316227	8	0.0118467
Trial 1	F1	P	F	0:00:19.418-0:00:19.684	BL	0.00316227	8	0.0118466
Trial 1	F1	P	F	0:00:19.684-0:00:19.950	BL	0.00316227	8	0.0118467
Trial 1	F1	P	F	0:00:19.950-0:00:20.216	BL	0.152513	8	0.571346
Trial 1	F1	P	F	0:00:20.216-0:00:20.482	BL	0.00814334	8	0.0305069
Trial 1	F1	P	F	0:00:20.482-0:00:20.748	BL	0.00814334	8	0.0305071
Trial 1	F1	P	F	0:00:20.748-0:00:21.014	BL	0.00814334	8	0.0305069
Trial 1	F1	P	F	0:00:21.014-0:00:21.280	BL	0.00814334	8	0.0305071
Trial 1	F1	P	F	0:00:21.280-0:00:21.546	BL	0.00814334	8	0.0305069
Trial 1	F1	P	F	0:00:21.546-0:00:21.812	BL	0.00814334	8	0.0305069
Trial 1	F1	P	F	0:00:21.812-0:00:22.078	BL	0.00814334	8	0.0305071
Trial 1	F1	P	F	0:00:22.078-0:00:22.344	BL	0.00814334	8	0.0305069
Trial 1	F1	P	F	0:00:22.344-0:00:22.610	BL	0.00814334	8	0.0305071
Trial 1	F1	P	F	0:00:22.610-0:00:22.876	BL	0.00814334	8	0.0305069
Trial 1	F1	P	F	0:00:22.876-0:00:23.142	BL	0.00814334	8	0.0305069
Trial 1	F1	P	F	0:00:23.142-0:00:23.408	BL	0.00814334	8	0.0305071
Trial 1	F1	P	F	0:00:23.408-0:00:23.674	BL	0.00814334	8	0.0305069
Trial 1	F1	P	F	0:00:23.674-0:00:23.940	BL	0.00814334	8	0.0305071
Trial 1	F1	P	F	0:00:23.940-0:00:24.206	BL	0.00814334	8	0.0305069
Trial 1	F1	P	F	0:00:24.206-0:00:24.472	BL	0.00814334	8	0.0305069
Trial 1	F1	P	F	0:00:24.472-0:00:24.738	BL	0.00814334	8	0.0305071
Trial 1	F1	P	F	0:00:24.738-0:00:25.004	BL	0.00814334	8	0.0305069
Trial 1	F1	P	F	0:00:25.004-0:00:25.270	BL	0.00814334	8	0.0305071
Trial 1	F1	P	F	0:00:25.270-0:00:25.536	BL	0.00814334	8	0.0305069
Trial 1	F1	P	F	0:00:25.536-0:00:25.802	BL	0.00814334	8	0.0305069
Trial 1	F1	P	F	0:00:25.802-0:00:26.068	BL	0.00814334	8	0.0305071
Trial 1	F1	P	F	0:00:26.068-0:00:26.334	BL	0.00814334	8	0.0305069
Trial 1	F1	P	F	0:00:26.334-0:00:26.600	BL	0.00814334	8	0.0305071
Trial 1	F1	P	F	0:00:26.600-0:00:26.866	BL	0.00814334	8	0.0305069
Trial 1	F1	P	F	0:00:26.866-0:00:27.132	BL	0.00814334	8	0.0305069
Trial 1	F1	P	F	0:00:27.132-0:00:27.398	BL	0.00814334	8	0.0305071
Trial 1	F1	P	F	0:00:27.398-0:00:27.664	BL	0.00814334	8	0.0305069
Trial 1	F1	P	F	0:00:27.664-0:00:27.930	BL	0.00814334	8	0.0305071
Trial 1	F1	P	F	0:00:27.930-0:00:28.196	BL	0.00814334	8	0.0305069
Trial 1	F1	P	F	0:00:28.196-0:00:28.462	BL	0.00814334	8	0.0305069
Trial 1	F1	P	F	0:00:28.462-0:00:28.728	BL	0.00712542	7	0.030507
Trial 1	F1	P	F	0:00:28.728-0:00:28.994	BL	0.00814334	8	0.0305071
Trial 1	F1	P	F	0:00:28.994-0:00:29.260	BL	0.00814334	8	0.0305069
Trial 1	F1	P	F	0:00:29.260-0:00:29.526	BL	0.00814334	8	0.0305071
Trial 1	F1	P	F	0:00:29.526-0:00:29.792	BL	0.00814334	8	0.0305069
Trial 1	F1	P	F	0:00:29.792-0:00:30.058	BL	0.00814334	8	0.0305069
Trial 1	F1	P	F	0:00:30.058-0:00:30.324	BL	0.174776	8	0.654749
Trial 1	F1	P	F	0:00:30.324-0:00:30.590	BL	0.184602	8	0.691575
Trial 1	F1	P	F	0:00:30.590-0:00:30.856	BL	0.0119411	8	0.0447345
Trial 1	F1	P	F	0:00:30.856-0:00:31.122	BL	0.0119411	8	0.0447343
Trial 1	F1	P	F	0:00:31.122-0:00:31.388	BL	0.0119411	8	0.0447343
Trial 1	F1	P	F	0:00:31.388-0:00:31.654	BL	0.0119411	8	0.0447345
Trial 1	F1	P	F	0:00:31.654-0:00:31.920	BL	0.0119411	8	0.0447343
Trial 1	F1	P	F	0:00:31.920-0:00:32.186	BL	0.0119411	8	0.0447345
Trial 1	F1	P	F	0:00:32.186-0:00:32.452	BL	0.0119411	8	0.0447343
Trial 1	F1	P	F	0:00:32.452-0:00:32.718	BL	0.0119411	8	0.0447343
Trial 1	F1	P	F	0:00:32.718-0:00:32.984	BL	0.0119411	8	0.0447345
Trial 1	F1	P	F	0:00:32.984-0:00:33.250	BL	0.0119411	8	0.0447343
Trial 1	F1	P	F	0:00:33.250-0:00:33.516	BL	0.0119411	8	0.0447345
Trial 1	F1	P	F	0:00:33.516-0:00:33.782	BL	0.0119411	8	0.0447343
Trial 1	F1	P	F	0:00:33.782-0:00:34.048	BL	0.0119411	8	0.0447343
Trial 1	F1	P	F	0:00:34.048-0:00:34.314	BL	0.0119411	8	0.0447345
Trial 1	F1	P	F	0:00:34.314-0:00:34.580	BL	0.0119411	8	0.0447343
Trial 1	F1	P	F	0:00:34.580-0:00:34.846	BL	0.0119411	8	0.0447345
Trial 1	F1	P	F	0:00:34.846-0:00:35.112	BL	0.0119411	8	0.0447343
Trial 1	F1	P	F	0:00:35.112-0:00:35.378	BL	0.0119411	8	0.0447343
Trial 1	F1	P	F	0:00:35.378-0:00:35.644	BL	0.0119411	8	0.0447345
Trial 1	F1	P	F	0:00:35.644-0:00:35.910	BL	0.0119411	8	0.0447343
Trial 1	F1	P	F	0:00:35.910-0:00:36.176	BL	0.0119411	8	0.0447345
Trial 1	F1	P	F	0:00:36.176-0:00:36.442	BL	0.0119411	8	0.0447343
Trial 1	F1	P	F	0:00:36.442-0:00:36.708	BL	0.0119411	8	0.0447343
Trial 1	F1	P	F	0:00:36.708-0:00:36.974	BL	0.0119411	8	0.0447345
Trial 1	F1	P	F	0:00:36.974-0:00:37.240	BL	0.0119411	8	0.0447343
Trial 1	F1	P	F	0:00:37.240-0:00:37.506	BL	0.0119411	8	0.0447345
Trial 1	F1	P	F	0:00:37.506-0:00:37.772	BL	0.0119411	8	0.0447343
Trial 1	F1	P	F	0:00:37.772-0:00:38.038	BL	0.0104485	7	0.0447344
Trial 1	F1	P	F	0:00:38.038-0:00:38.304	BL	0.0119411	8	0.0447345
Trial 1	F1	P	F	0:00:38.304-0:00:38.570	BL	0.0119411	8	0.0447343
Trial 1	F1	P	F	0:00:38.570-0:00:38.836	BL	0.0119411	8	0.0447343
Trial 1	F1	P	F	0:00:38.836-0:00:39.102	BL	0.0119411	8	0.0447345
Trial 1	F1	P	F	0:00:39.102-0:00:39.368	BL	0.0119411	8	0.0447343
Trial 1	F1	P	F	0:00:39.368-0:00:39.634	BL	0.0119411	8	0.0447345
Trial 1	F1	P	F	0:00:39.634-0:00:39.900	BL	0.0119411	8	0.0447343
Trial 1	F1	P	F	0:00:39.900-0:00:40.166	BL	0.0119411	8	0.0447343
Trial 1	F1	P	F	0:00:40.166-0:00:40.432	BL	0.0119411	8	0.0447345
Trial 1	F1	P	F	0:00:40.432-0:00:40.698	BL	0.0119411	8	0.0447343
Trial 1	F1	P	F	0:00:40.698-0:00:40.964	BL	0.0119411	8	0.0447345
Trial 1	F1	P	F	0:00:40.964-0:00:41.230	BL	0.0119411	8	0.0447343
Trial 1	F1	P	F	0:00:41.230-0:00:41.496	BL	0.0119411	8	0.0447343
Trial 1	F1	P	F	0:00:41.496-0:00:41.762	BL	0.0119411	8	0.0447345
Trial 1	F1	P	F	0:00:41.762-0:00:42.028	BL	0.0119411	8	0.0447343
Trial 1	F1	P	F	0:00:42.028-0:00:42.294	BL	0.0119411	8	0.0447345
Trial 1	F1	P	F	0:00:42.294-0:00:42.560	BL	0.0119411	8	0.0447343
Trial 1	F1	P	F	0:00:42.560-0:00:42.826	BL	0.0119411	8	0.0447343
Trial 1	F1	P	F	0:00:42.826-0:00:43.092	BL	0.0119411	8	0.0447345
Trial 1	F1	P	F	0:00:43.092-0:00:43.358	BL	0.0119411	8	0.0447343
Trial 1	F1	P	F	0:00:43.358-0:00:43.624	BL	0.0119411	8	0.0447345
Trial 1	F1	P	F	0:00:43.624-0:00:43.890	BL	0.0119411	8	0.0447343
Trial 1	F1	P	F	0:00:43.890-0:00:44.156	BL	0.0119411	8	0.0447343
Trial 1	F1	P	F	0:00:44.156-0:00:44.422	BL	0.0119411	8	0.0447345
Trial 1	F1	P	F	0:00:44.422-0:00:44.688	BL	0.0119411	8	0.0447343
Trial 1	F1	P	F	0:00:44.688-0:00:44.954	BL	0.0119411	8	0.0447345
Trial 1	F1	P	F	0:00:44.954-0:00:45.220	BL	0.0119411	8	0.0447343
Trial 1	F1	P	F	0:00:45.220-0:00:45.486	BL	0.0119411	8	0.0447343
Trial 1	F1	P	F	0:00:45.486-0:00:45.752	BL	0.0119411	8	0.0447345
Trial 1	F1	P	F	0:00:45.752-0:00:46.018	BL	0.0119411	8	0.0447343
Trial 1	F1	P	F	0:00:46.018-0:00:46.284	BL	0.0119411	8	0.0447345
Trial 1	F1	P	F	0:00:46.284-0:00:46.550	BL	0.0119411	8	0.0447343
Trial 1	F1	P	F	0:00:46.550-0:00:46.816	BL	0.0119411	8	0.0447343
Trial 1	F1	P	F	0:00:46.816-0:00:47.082	BL	0.0119411	8	0.0447345
Trial 1	F1	P	F	0:00:47.082-0:00:47.348	BL	0.0119411	8	0.0447343
Trial 1	F1	P	F	0:00:47.348-0:00:47.614	BL	0.0104485	7	0.0447344
Trial 1	F1	P	F	0:00:47.614-0:00:47.880	BL	0.0119411	8	0.0447345
Trial 1	F1	P	F	0:00:47.880-0:00:48.146	BL	0.0119411	8	0.0447343
Trial 1	F1	P	F	0:00:48.146-0:00:48.412	BL	0.0119411	8	0.0447343
Trial 1	F1	P	F	0:00:48.412-0:00:48.678	BL	0.0119411	8	0.0447345
Trial 1	F1	P	F	0:00:48.678-0:00:48.944	BL	0.0119411	8	0.0447343
Trial 1	F1	P	F	0:00:48.944-0:00:49.210	BL	0.0119411	8	0.0447345
Trial 1	F1	P	F	0:00:49.210-0:00:49.476	BL	0.313764	8	1.17544
Trial 1	F1	P	F	0:00:49.476-0:00:49.742	BL	0.488004	8	1.82819
Trial 1	F1	P	F	0:00:49.742-0:00:50.008	BL	0.454302	8	1.70193
Trial 1	F1	P	F	0:00:50.008-0:00:50.274	BL	0.454302	8	1.70193
Trial 1	F1	P	F	0:00:50.274-0:00:50.540	BL	0.616445	8	2.30937
Trial 1	F1	P	F	0:00:50.540-0:00:50.806	BL	0.222645	8	0.834078
Trial 1	F1	P	F	0:00:50.806-0:00:51.072	BL	0.0725254	8	0.271699
Trial 1	F1	P	F	0:00:51.072-0:00:51.338	BL	0.10127	8	0.379381
Trial 1	F1	P	F	0:00:51.338-0:00:51.604	BL	0.113843	8	0.426484
Trial 1	F1	P	F	0:00:51.604-0:00:51.870	BL	0.047651	8	0.178512
Trial 1	F1	P	F	0:00:51.870-0:00:52.136	BL	0.0843416	8	0.315963
Trial 1	F1	P	F	0:00:52.136-0:00:52.402	BL	0.0517308	8	0.193796
Trial 1	F1	P	F	0:00:52.402-0:00:52.668	BL	0.00883968	8	0.0331157
Trial 1	F1	P	F	0:00:52.668-0:00:52.934	BL	0.00883968	8	0.0331156
Trial 1	F1	P	F	0:00:52.934-0:00:53.200	BL	0.00883968	8	0.0331157
Trial 1	F1	P	F	0:00:53.200-0:00:53.466	BL	0.00883968	8	0.0331156
Trial 1	F1	P	F	0:00:53.466-0:00:53.732	BL	0.00883968	8	0.0331156
Trial 1	F1	P	F	0:00:53.732-0:00:53.998	BL	0.00883968	8	0.0331157
Trial 1	F1	P	F	0:00:53.998-0:00:54.264	BL	0.00883968	8	0.0331156
Trial 1	F1	P	F	0:00:54.264-0:00:54.530	BL	0.00883968	8	0.0331157
Trial 1	F1	P	F	0:00:54.530-0:00:54.796	BL	0.00883968	8	0.0331156
Trial 1	F1	P	F	0:00:54.796-0:00:55.062	BL	0.00883968	8	0.0331156
Trial 1	F1	P	F	0:00:55.062-0:00:55.328	BL	0.00883968	8	0.0331157
Trial 1	F1	P	F	0:00:55.328-0:00:55.594	BL	0.00883968	8	0.0331156
Trial 1	F1	P	F	0:00:55.594-0:00:55.860	BL	0.00883968	8	0.0331157
Trial 1	F1	P	F	0:00:55.860-0:00:56.126	BL	0.00883968	8	0.0331156
Trial 1	F1	P	F	0:00:56.126-0:00:56.392	BL	0.00883968	8	0.0331156
Trial 1	F1	P	F	0:00:56.392-0:00:56.658	BL	0.00883968	8	0.0331157
Trial 1	F1	P	F	0:00:56.658-0:00:56.924	BL	0.00883968	8	0.0331156
Trial 1	F1	P	F	0:00:56.924-0:00:57.190	BL	0.00773472	7	0.0331156
Trial 1	F1	P	F	0:00:57.190-0:00:57.456	BL	0.00883968	8	0.0331157
Trial 1	F1	P	F	0:00:57.456-0:00:57.722	BL	0.00883968	8	0.0331156
Trial 1	F1	P	F	0:00:57.722-0:00:57.988	BL	0.00883968	8	0.0331157
Trial 1	F1	P	F	0:00:57.988-0:00:58.254	BL	0.00883968	8	0.0331156
Trial 1	F1	P	F	0:00:58.254-0:00:58.520	BL	0.00883968	8	0.0331156
Trial 1	F1	P	F	0:00:58.520-0:00:58.786	BL	0.00883968	8	0.0331157
Trial 1	F1	P	F	0:00:58.786-0:00:59.052	BL	0.00883968	8	0.0331156
Trial 1	F1	P	F	0:00:59.052-0:00:59.318	BL	0.00883968	8	0.0331157
Trial 1	F1	P	F	0:00:59.318-0:00:59.584	BL	0.00883968	8	0.0331156
Trial 1	F1	P	F	0:00:59.584-0:00:59.850	BL	0.00883968	8	0.0331156
Trial 1	F1	P	F	0:00:59.850-0:01:00.116	BL	0.00883968	8	0.0331157
Trial 1	F1	P	F	0:01:00.116-0:01:00.382	BL	0.00883968	8	0.0331156
Trial 1	F1	P	F	0:01:00.382-0:01:00.648	BL	0.00883968	8	0.0331157
Trial 1	F1	P	F	0:01:00.648-0:01:00.914	BL	0.00883968	8	0.0331156
Trial 1	F1	P	F	0:01:00.914-0:01:01.180	BL	0.00883968	8	0.0331156
Trial 1	F1	P	F	0:01:01.180-0:01:01.446	BL	0.00883968	8	0.0331157
Trial 1	F1	P	F	0:01:01.446-0:01:01.712	BL	0.00883968	8	0.0331156
Trial 1	F1	P	F	0:01:01.712-0:01:01.978	BL	0.00883968	8	0.0331157
Trial 1	F1	P	F	0:01:01.978-0:01:02.244	BL	0.00883968	8	0.0331156
Trial 1	F1	P	F	0:01:02.244-0:01:02.510	BL	0.00883968	8	0.0331156
Trial 1	F1	P	F	0:01:02.510-0:01:02.776	BL	0.00883968	8	0.0331157
Trial 1	F1	P	F	0:01:02.776-0:01:03.042	BL	0.00883968	8	0.0331156
Trial 1	F1	P	F	0:01:03.042-0:01:03.308	BL	0.00883968	8	0.0331157
Trial 1	F1	P	F	0:01:03.308-0:01:03.574	BL	0.00883968	8	0.0331156
Trial 1	F1	P	F	0:01:03.574-0:01:03.840	BL	0.00883968	8	0.0331156
Trial 1	F1	P	F	0:01:03.840-0:01:04.106	BL	0.00883968	8	0.0331157
Trial 1	F1	P	F	0:01:04.106-0:01:04.372	BL	0.00883968	8	0.0331156
Trial 1	F1	P	F	0:01:04.372-0:01:04.638	BL	0.00883968	8	0.0331157
Trial 1	F1	P	F	0:01:04.638-0:01:04.904	BL	0.00883968	8	0.0331156
Trial 1	F1	P	F	0:01:04.904-0:01:05.170	BL	0.00883968	8	0.0331156
Trial 1	F1	P	F	0:01:05.170-0:01:05.436	BL	0.00883968	8	0.0331157
Trial 1	F1	P	F	0:01:05.436-0:01:05.702	BL	0.00883968	8	0.0331156
Trial 1	F1	P	F	0:01:05.702-0:01:05.968	BL	0.00883968	8	0.0331157
Trial 1	F1	P	F	0:01:05.968-0:01:06.234	BL	0.00883968	8	0.0331156
Trial 1	F1	P	F	0:01:06.234-0:01:06.500	BL	0.00883968	8	0.0331156
Trial 1	F1	P	F	0:01:06.500-0:01:06.766	BL	0.00773472	7	0.0331156
Trial 1	F1	P	F	0:01:06.766-0:01:07.032	BL	0.00883968	8	0.0331157
Trial 1	F1	P	F	0:01:07.032-0:01:07.298	BL	0.00883968	8	0.0331156
Trial 1	F1	P	F	0:01:07.298-0:01:07.564	BL	0.00883968	8	0.0331157
Trial 1	F1	P	F	0:01:07.564-0:01:07.830	BL	0.00883968	8	0.0331156
Trial 1	F1	P	F	0:01:07.830-0:01:08.096	BL	0.00883968	8	0.0331156
Trial 1	F1	P	F	0:01:08.096-0:01:08.362	BL	0.00883968	8	0.0331157
Trial 1	F1	P	F	0:01:08.362-0:01:08.628	BL	0.00883968	8	0.0331156
Trial 1	F1	P	F	0:01:08.628-0:01:08.894	BL	0.00883968	8	0.0331157
Trial 1	F1	P	F	0:01:08.894-0:01:09.160	BL	0.00883968	8	0.0331156
Trial 1	F1	P	F	0:01:09.160-0:01:09.426	BL	0.00883968	8	0.0331156
Trial 1	F1	P	F	0:01:09.426-0:01:09.692	BL	0.00883968	8	0.0331157
Trial 1	F1	P	F	0:01:09.692-0:01:09.958	BL	0.00883968	8	0.0331156
Trial 1	F1	P	F	0:01:09.958-0:01:10.224	BL	0.00883968	8	0.0331157
Trial 1	F1	P	F	0:01:10.224-0:01:10.490	BL	0.00883968	8	0.0331156
Trial 1	F1	P	F	0:01:10.490-0:01:10.756	BL	0.00883968	8	0.0331156
Trial 1	F1	P	F	0:01:10.756-0:01:11.022	BL	0.00883968	8	0.0331157
Trial 1	F1	P	F	0:01:11.022-0:01:11.288	BL	0.00883968	8	0.0331156
Trial 1	F1	P	F	0:01:11.288-0:01:11.554	BL	0.00883968	8	0.0331157
Trial 1	F1	P	F	0:01:11.554-0:01:11.820	BL	0.00883968	8	0.0331156
Trial 1	F1	P	F	0:01:11.820-0:01:12.086	BL	0.00883968	8	0.0331156
Trial 1	F1	P	F	0:01:12.086-0:01:12.352	BL	0.00883968	8	0.0331157
Trial 1	F1	P	F	0:01:12.352-0:01:12.618	BL	0.00883968	8	0.0331156
Trial 1	F1	P	F	0:01:12.618-0:01:12.884	BL	0.00883968	8	0.0331157
Trial 1	F1	P	F	0:01:12.884-0:01:13.150	BL	0.00883968	8	0.0331156
Trial 1	F1	P	F	0:01:13.150-0:01:13.416	BL	0.00883968	8	0.0331156
Trial 1	F1	P	F	0:01:13.416-0:01:13.682	BL	0.00883968	8	0.0331157
Trial 1	F1	P	F	0:01:13.682-0:01:13.948	BL	0.00883968	8	0.0331156
Trial 1	F1	P	F	0:01:13.948-0:01:14.214	BL	0.00883968	8	0.0331157
Trial 1	F1	P	F	0:01:14.214-0:01:14.480	BL	0.00883968	8	0.0331156
Trial 1	F1	P	F	0:01:14.480-0:01:14.746	BL	0.00883968	8	0.0331156
Trial 1	F1	P	F	0:01:14.746-0:01:15.012	BL	0.00883968	8	0.0331157
Trial 1	F1	P	F	0:01:15.012-0:01:15.278	BL	0.00883968	8	0.0331156
Trial 1	F1	P	F	0:01:15.278-0:01:15.544	BL	0.00883968	8	0.0331157
Trial 1	F1	P	F	0:01:15.544-0:01:15.810	BL	0.00883968	8	0.0331156
Trial 1	F1	P	F	0:01:15.810-0:01:16.076	BL	0.00773472	7	0.0331156
Trial 1	F1	P	F	0:01:16.076-0:01:16.342	BL	0.00883968	8	0.0331157
Trial 1	F1	P	F	0:01:16.342-0:01:16.608	BL	0.00883968	8	0.0331156
Trial 1	F1	P	F	0:01:16.608-0:01:16.874	BL	0.00883968	8	0.0331156
Trial 1	F1	P	F	0:01:16.874-0:01:17.140	BL	0.00883968	8	0.0331157
Trial 1	F1	P	F	0:01:17.140-0:01:17.406	BL	0.00883968	8	0.0331156
Trial 1	F1	P	F	0:01:17.406-0:01:17.672	BL	0.00883968	8	0.0331157
Trial 1	F1	P	F	0:01:17.672-0:01:17.938	BL	0.00883968	8	0.0331156
Trial 1	F1	P	F	0:01:17.938-0:01:18.204	BL	0.00883968	8	0.0331156
Trial 1	F1	P	F	0:01:18.204-0:01:18.470	BL	0.00883968	8	0.0331157
Trial 1	F1	P	F	0:01:18.470-0:01:18.736	BL	0.00883968	8	0.0331156
Trial 1	F1	P	F	0:01:18.736-0:01:19.002	BL	0.00883968	8	0.0331157
Trial 1	F1	P	F	0:01:19.002-0:01:19.268	BL	0.00883968	8	0.0331156
Trial 1	F1	P	F	0:01:19.268-0:01:19.534	BL	0.00883968	8	0.0331156
Trial 1	F1	P	F	0:01:19.534-0:01:19.800	BL	0.00883968	8	0.0331157
Trial 1	F1	P	F	0:01:19.800-0:01:20.066	BL	0.00883968	8	0.0331156
Trial 1	F1	P	F	0:01:20.066-0:01:20.332	BL	0.00883968	8	0.0331157
Trial 1	F1	P	F	0:01:20.332-0:01:20.598	BL	0.00883968	8	0.0331156
Trial 1	F1	P	F	0:01:20.598-0:01:20.864	BL	0.00883968	8	0.0331156
Trial 1	F1	P	F	0:01:20.864-0:01:21.130	BL	0.00883968	8	0.0331157
Trial 1	F1	P	F	0:01:21.130-0:01:21.396	BL	0.00883968	8	0.0331156
Trial 1	F1	P	F	0:01:21.396-0:01:21.662	BL	0.00883968	8	0.0331157
Trial 1	F1	P	F	0:01:21.662-0:01:21.928	BL	0.00883968	8	0.0331156
Trial 1	F1	P	F	0:01:21.928-0:01:22.194	BL	0.00883968	8	0.0331156
Trial 1	F1	P	F	0:01:22.194-0:01:22.460	BL	0.00883968	8	0.0331157
Trial 1	F1	P	F	0:01:22.460-0:01:22.726	BL	0.00883968	8	0.0331156
Trial 1	F1	P	F	0:01:22.726-0:01:22.992	BL	0.00883968	8	0.0331157
Trial 1	F1	P	F	0:01:22.992-0:01:23.258	BL	0.00883968	8	0.0331156
Trial 1	F1	P	F	0:01:23.258-0:01:23.524	BL	0.00883968	8	0.0331156
Trial 1	F1	P	F	0:01:23.524-0:01:23.790	BL	0.00883968	8	0.0331157
Trial 1	F1	P	F	0:01:23.790-0:01:24.056	BL	0.00883968	8	0.0331156
Trial 1	F1	P	F	0:01:24.056-0:01:24.322	BL	0.00883968	8	0.0331157
Trial 1	F1	P	F	0:01:24.322-0:01:24.588	BL	0.00883968	8	0.0331156
Trial 1	F1	P	F	0:01:24.588-0:01:24.854	BL	0.00883968	8	0.0331156
Trial 1	F1	P	F	0:01:24.854-0:01:25.120	BL	0.00883968	8	0.0331157
Trial 1	F1	P	F	0:01:25.120-0:01:25.386	BL	0.00883968	8	0.0331156
Trial 1	F1	P	F	0:01:25.386-0:01:25.652	BL	0.00773472	7	0.0331156
Trial 1	F1	P	F	0:01:25.652-0:01:25.918	BL	0.00883968	8	0.0331157
Trial 1	F1	P	F	0:01:25.918-0:01:26.184	BL	0.00883968	8	0.0331156
Trial 1	F1	P	F	0:01:26.184-0:01:26.450	BL	0.351446	8	1.31659
Trial 1	F1	P	F	0:01:26.450-0:01:26.716	BL	0.977551	8	3.66217
Trial 1	F1	P	F	0:01:26.716-0:01:26.982	BL	1.04268	8	3.90618
Trial 1	F1	P	F	0:01:26.982-0:01:27.248	BL	0.338406	8	1.26776
Trial 1	F1	P	F	0:01:27.248-0:01:27.514	BL	0.215723	8	0.808151
Trial 1	F1	P	F	0:01:27.514-0:01:27.780	BL	0.0314133	8	0.117682
Trial 1	F1	P	F	0:01:27.780-0:01:28.046	BL	0.0239765	8	0.089822
Trial 1	F1	P	F	0:01:28.046-0:01:28.312	BL	0.0239765	8	0.0898217
Trial 1	F1	P	F	0:01:28.312-0:01:28.578	BL	0.0239765	8	0.089822
Trial 1	F1	P	F	0:01:28.578-0:01:28.844	BL	0.0239765	8	0.0898217
Trial 1	F1	P	F	0:01:28.844-0:01:29.110	BL	0.0239765	8	0.0898217
Trial 1	F1	P	F	0:01:29.110-0:01:29.376	BL	0.0239765	8	0.089822
Trial 1	F1	P	F	0:01:29.376-0:01:29.642	BL	0.0239765	8	0.0898217
Trial 1	F1	P	F	0:01:29.642-0:01:29.908	BL	0.0239765	8	0.089822
Trial 1	F1	P	F	0:01:29.908-0:01:30.174	BL	0.0239765	8	0.0898217
Trial 1	F1	P	F	0:01:30.174-0:01:30.440	BL	0.0239765	8	0.0898217
Trial 1	F1	P	F	0:01:30.440-0:01:30.706	BL	0.0239765	8	0.089822
Trial 1	F1	P	F	0:01:30.706-0:01:30.972	BL	0.0239765	8	0.0898217
Trial 1	F1	P	F	0:01:30.972-0:01:31.238	BL	0.0239765	8	0.089822
Trial 1	F1	P	F	0:01:31.238-0:01:31.504	BL	0.0239765	8	0.0898217
Trial 1	F1	P	F	0:01:31.504-0:01:31.770	BL	0.0239765	8	0.0898217
Trial 1	F1	P	F	0:01:31.770-0:01:32.036	BL	0.0239765	8	0.089822
Trial 1	F1	P	F	0:01:32.036-0:01:32.302	BL	0.0239765	8	0.0898217
Trial 1	F1	P	F	0:01:32.302-0:01:32.568	BL	0.0239765	8	0.089822
Trial 1	F1	P	F	0:01:32.568-0:01:32.834	BL	0.0239765	8	0.0898217
Trial 1	F1	P	F	0:01:32.834-0:01:33.100	BL	0.0239765	8	0.0898217
Trial 1	F1	P	F	0:01:33.100-0:01:33.366	BL	0.0239765	8	0.089822
Trial 1	F1	P	F	0:01:33.366-0:01:33.632	BL	0.0239765	8	0.0898217
Trial 1	F1	P	F	0:01:33.632-0:01:33.898	BL	0.0239765	8	0.089822
Trial 1	F1	P	F	0:01:33.898-0:01:34.164	BL	0.0239765	8	0.0898217
Trial 1	F1	P	F	0:01:34.164-0:01:34.430	BL	0.0239765	8	0.0898217
Trial 1	F1	P	F	0:01:34.430-0:01:34.696	BL	0.0239765	8	0.089822
Trial 1	F1	P	F	0:01:34.696-0:01:34.962	BL	0.0239765	8	0.0898217
Trial 1	F1	P	F	0:01:34.962-0:01:35.228	BL	0.0209794	7	0.0898218
Trial 1	F1	P	F	0:01:35.228-0:01:35.494	BL	0.0239765	8	0.089822
Trial 1	F1	P	F	0:01:35.494-0:01:35.760	BL	0.0239765	8	0.0898217
Trial 1	F1	P	F	0:01:35.760-0:01:36.026	BL	0.0239765	8	0.089822
Trial 1	F1	P	F	0:01:36.026-0:01:36.292	BL	0.0239765	8	0.0898217
Trial 1	F1	P	F	0:01:36.292-0:01:36.558	BL	0.0239765	8	0.0898217
Trial 1	F1	P	F	0:01:36.558-0:01:36.824	BL	0.0239765	8	0.089822
Trial 1	F1	P	F	0:01:36.824-0:01:37.090	BL	0.0239765	8	0.0898217
Trial 1	F1	P	F	0:01:37.090-0:01:37.356	BL	0.0239765	8	0.089822
Trial 1	F1	P	F	0:01:37.356-0:01:37.622	BL	0.0239765	8	0.0898217
Trial 1	F1	P	F	0:01:37.622-0:01:37.888	BL	0.0239765	8	0.0898217
Trial 1	F1	P	F	0:01:37.888-0:01:38.154	BL	0.0239765	8	0.089822
Trial 1	F1	P	F	0:01:38.154-0:01:38.420	BL	0.0239765	8	0.0898217
Trial 1	F1	P	F	0:01:38.420-0:01:38.686	BL	0.0239765	8	0.089822
Trial 1	F1	P	F	0:01:38.686-0:01:38.952	BL	0.0239765	8	0.0898217
Trial 1	F1	P	F	0:01:38.952-0:01:39.218	BL	0.0239765	8	0.0898217
Trial 1	F1	P	F	0:01:39.218-0:01:39.484	BL	0.0239765	8	0.089822
Trial 1	F1	P	F	0:01:39.484-0:01:39.750	BL	0.0239765	8	0.0898217
Trial 1	F1	P	F	0:01:39.750-0:01:40.016	BL	0.0239765	8	0.089822
Trial 1	F1	P	F	0:01:40.016-0:01:40.282	BL	0.0239765	8	0.0898217
Trial 1	F1	P	F	0:01:40.282-0:01:40.548	BL	0.0239765	8	0.0898217
Trial 1	F1	P	F	0:01:40.548-0:01:40.814	BL	0.0239765	8	0.089822
Trial 1	F1	P	F	0:01:40.814-0:01:41.080	BL	0.0239765	8	0.0898217
Trial 1	F1	P	F	0:01:41.080-0:01:41.346	BL	0.0239765	8	0.089822
Trial 1	F1	P	F	0:01:41.346-0:01:41.612	BL	0.0239765	8	0.0898217
Trial 1	F1	P	F	0:01:41.612-0:01:41.878	BL	0.0239765	8	0.0898217
Trial 1	F1	P	F	0:01:41.878-0:01:42.144	BL	0.0239765	8	0.089822
Trial 1	F1	P	F	0:01:42.144-0:01:42.410	BL	0.0239765	8	0.0898217
Trial 1	F1	P	F	0:01:42.410-0:01:42.676	BL	0.0239765	8	0.089822
Trial 1	F1	P	F	0:01:42.676-0:01:42.942	BL	0.0239765	8	0.0898217
Trial 1	F1	P	F	0:01:42.942-0:01:43.208	BL	0.0239765	8	0.0898217
Trial 1	F1	P	F	0:01:43.208-0:01:43.474	BL	0.0239765	8	0.089822
Trial 1	F1	P	F	0:01:43.474-0:01:43.740	BL	0.0239765	8	0.0898217
Trial 1	F1	P	F	0:01:43.740-0:01:44.006	BL	0.0239765	8	0.089822
Trial 1	F1	P	F	0:01:44.006-0:01:44.272	BL	0.0239765	8	0.0898217
Trial 1	F1	P	F	0:01:44.272-0:01:44.538	BL	0.0239765	8	0.0898217
Trial 1	F1	P	F	0:01:44.538-0:01:44.804	BL	0.0359526	7	0.153928
Trial 1	F1	P	F	0:01:44.804-0:01:45.070	BL	0.303505	8	1.13701
Trial 1	F1	P	F	0:01:45.070-0:01:45.336	BL	0.800441	8	2.99866
Trial 1	F1	P	F	0:01:45.336-0:01:45.602	BL	0.101638	8	0.380765
Trial 1	F1	P	F	0:01:45.602-0:01:45.868	BL	0.0470323	8	0.176195
Trial 1	F1	P	F	0:01:45.868-0:01:46.134	BL	0.0470323	8	0.176195
Trial 1	F1	P	F	0:01:46.134-0:01:46.400	BL	0.0470323	8	0.176195
Trial 1	F1	P	F	0:01:46.400-0:01:46.666	BL	0.0470323	8	0.176195
Trial 1	F1	P	F	0:01:46.666-0:01:46.932	BL	0.0470323	8	0.176195
Trial 1	F1	P	F	0:01:46.932-0:01:47.198	BL	0.0470323	8	0.176195
Trial 1	F1	P	F	0:01:47.198-0:01:47.464	BL	0.0470323	8	0.176195
Trial 1	F1	P	F	0:01:47.464-0:01:47.730	BL	0.0470323	8	0.176195
Trial 1	F1	P	F	0:01:47.730-0:01:47.996	BL	0.0470323	8	0.176195
Trial 1	F1	P	F	0:01:47.996-0:01:48.262	BL	0.0470323	8	0.176195
Trial 1	F1	P	F	0:01:48.262-0:01:48.528	BL	0.0470323	8	0.176195
Trial 1	F1	P	F	0:01:48.528-0:01:48.794	BL	0.0470323	8	0.176195
Trial 1	F1	P	F	0:01:48.794-0:01:49.060	BL	0.0470323	8	0.176195
Trial 1	F1	P	F	0:01:49.060-0:01:49.326	BL	0.0470323	8	0.176195
Trial 1	F1	P	F	0:01:49.326-0:01:49.592	BL	0.0470323	8	0.176195
Trial 1	F1	P	F	0:01:49.592-0:01:49.858	BL	0.0470323	8	0.176195
Trial 1	F1	P	F	0:01:49.858-0:01:50.124	BL	0.0470323	8	0.176195
Trial 1	F1	P	F	0:01:50.124-0:01:50.390	BL	0.0470323	8	0.176195
Trial 1	F1	P	F	0:01:50.390-0:01:50.656	BL	0.0470323	8	0.176195
Trial 1	F1	P	F	0:01:50.656-0:01:50.922	BL	0.0470323	8	0.176195
Trial 1	F1	P	F	0:01:50.922-0:01:51.188	BL	0.0470323	8	0.176195
Trial 1	F1	P	F	0:01:51.188-0:01:51.454	BL	0.0470323	8	0.176195
Trial 1	F1	P	F	0:01:51.454-0:01:51.720	BL	0.0470323	8	0.176195
Trial 1	F1	P	F	0:01:51.720-0:01:51.986	BL	0.0470323	8	0.176195
Trial 1	F1	P	F	0:01:51.986-0:01:52.252	BL	0.0470323	8	0.176195
Trial 1	F1	P	F	0:01:52.252-0:01:52.518	BL	0.0470323	8	0.176195
Trial 1	F1	P	F	0:01:52.518-0:01:52.784	BL	0.0470323	8	0.176195
Trial 1	F1	P	F	0:01:52.784-0:01:53.050	BL	0.0470323	8	0.176195
Trial 1	F1	P	F	0:01:53.050-0:01:53.316	BL	0.0470323	8	0.176195
Trial 1	F1	P	F	0:01:53.316-0:01:53.582	BL	0.0470323	8	0.176195
Trial 1	F1	P	F	0:01:53.582-0:01:53.848	BL	0.0470323	8	0.176195
Trial 1	F1	P	F	0:01:53.848-0:01:54.114	BL	0.0411533	7	0.176195
Trial 1	F1	P	F	0:01:54.114-0:01:54.380	BL	0.0470323	8	0.176195
Trial 1	F1	P	F	0:01:54.380-0:01:54.646	BL	0.0470323	8	0.176195
Trial 1	F1	P	F	0:01:54.646-0:01:54.912	BL	0.337755	8	1.26532
Trial 1	F1	P	F	0:01:54.912-0:01:55.178	BL	0.00192613	8	0.00721577
Trial 1	F1	P	F	0:01:55.178-0:01:55.444	BL	0.00192613	8	0.00721575
Trial 1	F1	P	F	0:01:55.444-0:01:55.710	BL	0.00192613	8	0.00721577
Trial 1	F1	P	F	0:01:55.710-0:01:55.976	BL	0.00192613	8	0.00721575
Trial 1	F1	P	F	0:01:55.976-0:01:56.242	BL	0.00192613	8	0.00721575
Trial 1	F1	P	F	0:01:56.242-0:01:56.508	BL	0.00192613	8	0.00721577
Trial 1	F1	P	F	0:01:56.508-0:01:56.774	BL	0.00192613	8	0.00721575
Trial 1	F1	P	F	0:01:56.774-0:01:57.040	BL	0.00192613	8	0.00721577
Trial 1	F1	P	F	0:01:57.040-0:01:57.306	BL	0.00192613	8	0.00721575
Trial 1	F1	P	F	0:01:57.306-0:01:57.572	BL	0.00192613	8	0.00721575
Trial 1	F1	P	F	0:01:57.572-0:01:57.838	BL	0.00192613	8	0.00721577
Trial 1	F1	P	F	0:01:57.838-0:01:58.104	BL	0.00192613	8	0.00721575
Trial 1	F1	P	F	0:01:58.104-0:01:58.370	BL	0.00192613	8	0.00721577
Trial 1	F1	P	F	0:01:58.370-0:01:58.636	BL	0.00192613	8	0.00721575
Trial 1	F1	P	F	0:01:58.636-0:01:58.902	BL	0.00192613	8	0.00721575
Trial 1	F1	P	F	0:01:58.902-0:01:59.168	BL	0.00192613	8	0.00721577
Trial 1	F1	P	F	0:01:59.168-0:01:59.434	BL	0.00192613	8	0.00721575
Trial 1	F1	P	F	0:01:59.434-0:01:59.700	BL	0.00192613	8	0.00721577
Trial 1	F1	P	F	0:01:59.700-0:01:59.966	BL	0.00192613	8	0.00721575
Trial 1	F1	P	F	0:01:59.966-0:02:00.232	BL	0.00192613	8	0.00721575
Trial 1	F1	P	F	0:02:00.232-0:02:00.498	BL	0.00192613	8	0.00721577
Trial 1	F1	P	F	0:02:00.498-0:02:00.764	BL	0.00192613	8	0.00721575
Trial 1	F1	P	F	0:02:00.764-0:02:01.030	BL	0.00192613	8	0.00721577
Trial 1	F1	P	F	0:02:01.030-0:02:01.296	BL	0.00192613	8	0.00721575
Trial 1	F1	P	F	0:02:01.296-0:02:01.562	BL	0.00192613	8	0.00721575
Trial 1	F1	P	F	0:02:01.562-0:02:01.828	BL	0.00192613	8	0.00721577
Trial 1	F1	P	F	0:02:01.828-0:02:02.094	BL	0.00192613	8	0.00721575
Trial 1	F1	P	F	0:02:02.094-0:02:02.360	BL	0.00192613	8	0.00721577
Trial 1	F1	P	F	0:02:02.360-0:02:02.626	BL	0.00192613	8	0.00721575
Trial 1	F1	P	F	0:02:02.626-0:02:02.892	BL	0.00192613	8	0.00721575
Trial 1	F1	P	F	0:02:02.892-0:02:03.158	BL	0.00192613	8	0.00721577
Trial 1	F1	P	F	0:02:03.158-0:02:03.424	BL	0.00192613	8	0.00721575
Trial 1	F1	P	F	0:02:03.424-0:02:03.690	BL	0.00168536	7	0.00721575
Trial 1	F1	P	F	0:02:03.690-0:02:03.956	BL	0.00192613	8	0.00721577
Trial 1	F1	P	F	0:02:03.956-0:02:04.222	BL	0.00192613	8	0.00721575
Trial 1	F1	P	F	0:02:04.222-0:02:04.488	BL	0.00192613	8	0.00721575
Trial 1	F1	P	F	0:02:04.488-0:02:04.754	BL	0.00192613	8	0.00721577
Trial 1	F1	P	F	0:02:04.754-0:02:05.020	BL	0.00192613	8	0.00721575
Trial 1	F1	P	F	0:02:05.020-0:02:05.286	BL	0.00192613	8	0.00721577
Trial 1	F1	P	F	0:02:05.286-0:02:05.552	BL	0.00192613	8	0.00721575
Trial 1	F1	P	F	0:02:05.552-0:02:05.818	BL	0.00192613	8	0.00721575
Trial 1	F1	P	F	0:02:05.818-0:02:06.084	BL	0.00192613	8	0.00721577
Trial 1	F1	P	F	0:02:06.084-0:02:06.350	BL	0.00192613	8	0.00721575
Trial 1	F1	P	F	0:02:06.350-0:02:06.616	BL	0.00192613	8	0.00721577
Trial 1	F1	P	F	0:02:06.616-0:02:06.882	BL	0.00192613	8	0.00721575
Trial 1	F1	P	F	0:02:06.882-0:02:07.148	BL	0.00192613	8	0.00721575
Trial 1	F1	P	F	0:02:07.148-0:02:07.414	BL	0.00192613	8	0.00721577
Trial 1	F1	P	F	0:02:07.414-0:02:07.680	BL	0.00192613	8	0.00721575
Trial 1	F1	P	F	0:02:07.680-0:02:07.946	BL	0.00192613	8	0.00721577
Trial 1	F1	P	F	0:02:07.946-0:02:08.212	BL	0.00192613	8	0.00721575
Trial 1	F1	P	F	0:02:08.212-0:02:08.478	BL	0.00192613	8	0.00721575
Trial 1	F1	P	F	0:02:08.478-0:02:08.744	BL	0.00192613	8	0.00721577
Trial 1	F1	P	F	0:02:08.744-0:02:09.010	BL	0.00192613	8	0.00721575
Trial 1	F1	P	F	0:02:09.010-0:02:09.276	BL	0.00192613	8	0.00721577
Trial 1	F1	P	F	0:02:09.276-0:02:09.542	BL	0.00192613	8	0.00721575
Trial 1	F1	P	F	0:02:09.542-0:02:09.808	BL	0.00192613	8	0.00721575
Trial 1	F1	P	F	0:02:09.808-0:02:10.074	BL	0.00192613	8	0.00721577
Trial 1	F1	P	F	0:02:10.074-0:02:10.340	BL	0.00192613	8	0.00721575
Trial 1	F1	P	F	0:02:10.340-0:02:10.606	BL	0.00192613	8	0.00721577
Trial 1	F1	P	F	0:02:10.606-0:02:10.872	BL	0.00192613	8	0.00721575
Trial 1	F1	P	F	0:02:10.872-0:02:11.138	BL	0.00192613	8	0.00721575
Trial 1	F1	P	F	0:02:11.138-0:02:11.404	BL	0.00192613	8	0.00721577
Trial 1	F1	P	F	0:02:11.404-0:02:11.670	BL	0.00192613	8	0.00721575
Trial 1	F1	P	F	0:02:11.670-0:02:11.936	BL	0.00192613	8	0.00721577
Trial 1	F1	P	F	0:02:11.936-0:02:12.202	BL	0.00192613	8	0.00721575
Trial 1	F1	P	F	0:02:12.202-0:02:12.468	BL	0.00192613	8	0.00721575
Trial 1	F1	P	F	0:02:12.468-0:02:12.734	BL	0.00192613	8	0.00721577
Trial 1	F1	P	F	0:02:12.734-0:02:13.000	BL	0.00192613	8	0.00721575
Trial 1	F1	P	F	0:02:13.000-0:02:13.266	BL	0.00168536	7	0.00721575
Trial 1	F1	P	F	0:02:13.266-0:02:13.532	BL	0.00192613	8	0.00721577
Trial 1	F1	P	F	0:02:13.532-0:02:13.798	BL	0.00192613	8	0.00721575
Trial 1	F1	P	F	0:02:13.798-0:02:14.064	BL	0.00192613	8	0.00721577
Trial 1	F1	P	F	0:02:14.064-0:02:14.330	BL	0.00192613	8	0.00721575
Trial 1	F1	P	F	0:02:14.330-0:02:14.596	BL	0.00192613	8	0.00721575
Trial 1	F1	P	F	0:02:14.596-0:02:14.862	BL	0.00192613	8	0.00721577
Trial 1	F1	P	F	0:02:14.862-0:02:15.128	BL	0.00192613	8	0.00721575
Trial 1	F1	P	F	0:02:15.128-0:02:15.394	BL	0.00192613	8	0.00721577
Trial 1	F1	P	F	0:02:15.394-0:02:15.660	BL	0.00192613	8	0.00721575
Trial 1	F1	P	F	0:02:15.660-0:02:15.926	BL	0.00192613	8	0.00721575
Trial 1	F1	P	F	0:02:15.926-0:02:16.192	BL	0.00192613	8	0.00721577
Trial 1	F1	P	F	0:02:16.192-0:02:16.458	BL	0.00192613	8	0.00721575
Trial 1	F1	P	F	0:02:16.458-0:02:16.724	BL	0.00192613	8	0.00721577
Trial 1	F1	P	F	0:02:16.724-0:02:16.990	BL	0.00192613	8	0.00721575
Trial 1	F1	P	F	0:02:16.990-0:02:17.256	BL	0.00192613	8	0.00721575
Trial 1	F1	P	F	0:02:17.256-0:02:17.522	BL	0.00192613	8	0.00721577
Trial 1	F1	P	F	0:02:17.522-0:02:17.788	BL	0.00192613	8	0.00721575
Trial 1	F1	P	F	0:02:17.788-0:02:18.054	BL	0.00192613	8	0.00721577
Trial 1	F1	P	F	0:02:18.054-0:02:18.320	BL	0.00192613	8	0.00721575
Trial 1	F1	P	F	0:02:18.320-0:02:18.586	BL	0.00192613	8	0.00721575
Trial 1	F1	P	F	0:02:18.586-0:02:18.852	BL	0.00192613	8	0.00721577
Trial 1	F1	P	F	0:02:18.852-0:02:19.118	BL	0.00192613	8	0.00721575
Trial 1	F1	P	F	0:02:19.118-0:02:19.384	BL	0.00192613	8	0.00721577
Trial 1	F1	P	F	0:02:19.384-0:02:19.650	BL	0.00192613	8	0.00721575
Trial 1	F1	P	F	0:02:19.650-0:02:19.916	BL	0.00192613	8	0.00721575
Trial 1	F1	P	F	0:02:19.916-0:02:20.182	BL	0.00192613	8	0.00721577
Trial 1	F1	P	F	0:02:20.182-0:02:20.448	BL	0.00192613	8	0.00721575
Trial 1	F1	P	F	0:02:20.448-0:02:20.714	BL	0.00192613	8	0.00721577
Trial 1	F1	P	F	0:02:20.714-0:02:20.980	BL	0.00192613	8	0.00721575
Trial 1	F1	P	F	0:02:20.980-0:02:21.246	BL	0.00192613	8	0.00721575
Trial 1	F1	P	F	0:02:21.246-0:02:21.512	BL	0.00192613	8	0.00721577
Trial 1	F1	P	F	0:02:21.512-0:02:21.778	BL	0.00192613	8	0.00721575
Trial 1	F1	P	F	0:02:21.778-0:02:22.044	BL	0.00192613	8	0.00721577
Trial 1	F1	P	F	0:02:22.044-0:02:22.310	BL	0.00192613	8	0.00721575
Trial 1	F1	P	F	0:02:22.310-0:02:22.576	BL	0.00192613	8	0.00721575
Trial 1	F1	P	F	0:02:22.576-0:02:22.842	BL	0.00168536	7	0.00721575
Trial 1	F1	P	F	0:02:22.842-0:02:23.108	BL	0.00192613	8	0.00721577
Trial 1	F1	P	F	0:02:23.108-0:02:23.374	BL	0.00192613	8	0.00721575
Trial 1	F1	P	F	0:02:23.374-0:02:23.640	BL	0.00192613	8	0.00721577
Trial 1	F1	P	F	0:02:23.640-0:02:23.906	BL	0.00192613	8	0.00721575
Trial 1	F1	P	F	0:02:23.906-0:02:24.172	BL	0.00192613	8	0.00721575
Trial 1	F1	P	F	0:02:24.172-0:02:24.438	BL	0.00192613	8	0.00721577
Trial 1	F1	P	F	0:02:24.438-0:02:24.704	BL	0.00192613	8	0.00721575
Trial 1	F1	P	F	0:02:24.704-0:02:24.970	BL	0.00192613	8	0.00721577
Trial 1	F1	P	F	0:02:24.970-0:02:25.236	BL	0.00192613	8	0.00721575
Trial 1	F1	P	F	0:02:25.236-0:02:25.502	BL	0.00192613	8	0.00721575
Trial 1	F1	P	F	0:02:25.502-0:02:25.768	BL	0.00192613	8	0.00721577
Trial 1	F1	P	F	0:02:25.768-0:02:26.034	BL	0.00192613	8	0.00721575
Trial 1	F1	P	F	0:02:26.034-0:02:26.300	BL	0.00192613	8	0.00721577
Trial 1	F1	P	F	0:02:26.300-0:02:26.566	BL	0.00192613	8	0.00721575
Trial 1	F1	P	F	0:02:26.566-0:02:26.832	BL	0.00192613	8	0.00721575
Trial 1	F1	P	F	0:02:26.832-0:02:27.098	BL	0.00192613	8	0.00721577
Trial 1	F1	P	F	0:02:27.098-0:02:27.364	BL	0.00192613	8	0.00721575
Trial 1	F1	P	F	0:02:27.364-0:02:27.630	BL	0.00192613	8	0.00721577
Trial 1	F1	P	F	0:02:27.630-0:02:27.896	BL	0.00192613	8	0.00721575
Trial 1	F1	P	F	0:02:27.896-0:02:28.162	BL	0.00192613	8	0.00721575
Trial 1	F1	P	F	0:02:28.162-0:02:28.428	BL	0.00192613	8	0.00721577
Trial 1	F1	P	F	0:02:28.428-0:02:28.694	BL	0.00192613	8	0.00721575
Trial 1	F1	P	F	0:02:28.694-0:02:28.960	BL	0.00192613	8	0.00721577
Trial 1	F1	P	F	0:02:28.960-0:02:29.226	BL	0.00192613	8	0.00721575
Trial 1	F1	P	F	0:02:29.226-0:02:29.492	BL	0.00192613	8	0.00721575
Trial 1	F1	P	F	0:02:29.492-0:02:29.758	BL	0.00192613	8	0.00721577
Trial 1	F1	P	F	0:02:29.758-0:02:30.024	BL	0.00192613	8	0.00721575
Trial 1	F1	P	F	0:02:30.024-0:02:30.290	BL	0.00192613	8	0.00721577
Trial 1	F1	P	F	0:02:30.290-0:02:30.556	BL	0.00192613	8	0.00721575
Trial 1	F1	P	F	0:02:30.556-0:02:30.822	BL	0.00192613	8	0.00721575
Trial 1	F1	P	F	0:02:30.822-0:02:31.088	BL	0.00192613	8	0.00721577
Trial 1	F1	P	F	0:02:31.088-0:02:31.354	BL	0.00192613	8	0.00721575
Trial 1	F1	P	F	0:02:31.354-0:02:31.620	BL	0.00192613	8	0.00721577
Trial 1	F1	P	F	0:02:31.620-0:02:31.886	BL	0.00192613	8	0.00721575
Trial 1	F1	P	F	0:02:31.886-0:02:32.152	BL	0.00168536	7	0.00721575
Trial 1	F1	P	F	0:02:32.152-0:02:32.418	BL	0.00192613	8	0.00721577
Trial 1	F1	P	F	0:02:32.418-0:02:32.684	BL	0.00192613	8	0.00721575
Trial 1	F1	P	F	0:02:32.684-0:02:32.950	BL	0.00192613	8	0.00721575
Trial 1	F1	P	F	0:02:32.950-0:02:33.216	BL	0.00192613	8	0.00721577
Trial 1	F1	P	F	0:02:33.216-0:02:33.482	BL	0.00192613	8	0.00721575
Trial 1	F1	P	F	0:02:33.482-0:02:33.748	BL	0.00192613	8	0.00721577
Trial 1	F1	P	F	0:02:33.748-0:02:34.014	BL	0.00192613	8	0.00721575
Trial 1	F1	P	F	0:02:34.014-0:02:34.280	BL	0.00192613	8	0.00721575
Trial 1	F1	P	F	0:02:34.280-0:02:34.546	BL	0.00192613	8	0.00721577
Trial 1	F1	P	F	0:02:34.546-0:02:34.812	BL	0.140252	8	0.525416
Trial 1	F1	P	F	0:02:34.812-0:02:35.078	BL	0.553212	8	2.07247
Trial 1	F1	P	F	0:02:35.078-0:02:35.344	BL	0.290659	8	1.08888
Trial 1	F1	P	F	0:02:35.344-0:02:35.610	BL	0.0939276	8	0.351876
Trial 1	F1	P	F	0:02:35.610-0:02:35.876	BL	0.0147592	8	0.0552917
Trial 1	F1	P	F	0:02:35.876-0:02:36.142	BL	0.0147592	8	0.0552915
Trial 1	F1	P	F	0:02:36.142-0:02:36.408	BL	0.0147592	8	0.0552917
Trial 1	F1	P	F	0:02:36.408-0:02:36.674	BL	0.0147592	8	0.0552915
Trial 1	F1	P	F	0:02:36.674-0:02:36.940	BL	0.0147592	8	0.0552915
Trial 1	F1	P	F	0:02:36.940-0:02:37.206	BL	0.0147592	8	0.0552917
Trial 1	F1	P	F	0:02:37.206-0:02:37.472	BL	0.0147592	8	0.0552915
Trial 1	F1	P	F	0:02:37.472-0:02:37.738	BL	0.0147592	8	0.0552917
Trial 1	F1	P	F	0:02:37.738-0:02:38.004	BL	0.0147592	8	0.0552915
Trial 1	F1	P	F	0:02:38.004-0:02:38.270	BL	0.0147592	8	0.0552915
Trial 1	F1	P	F	0:02:38.270-0:02:38.536	BL	0.0147592	8	0.0552917
Trial 1	F1	P	F	0:02:38.536-0:02:38.802	BL	0.0147592	8	0.0552915
Trial 1	F1	P	F	0:02:38.802-0:02:39.068	BL	0.0147592	8	0.0552917
Trial 1	F1	P	F	0:02:39.068-0:02:39.334	BL	0.0147592	8	0.0552915
Trial 1	F1	P	F	0:02:39.334-0:02:39.600	BL	0.0147592	8	0.0552915
Trial 1	F1	P	F	0:02:39.600-0:02:39.866	BL	0.0147592	8	0.0552917
Trial 1	F1	P	F	0:02:39.866-0:02:40.132	BL	0.0147592	8	0.0552915
Trial 1	F1	P	F	0:02:40.132-0:02:40.398	BL	0.0147592	8	0.0552917
Trial 1	F1	P	F	0:02:40.398-0:02:40.664	BL	0.0147592	8	0.0552915
Trial 1	F1	P	F	0:02:40.664-0:02:40.930	BL	0.0147592	8	0.0552915
Trial 1	F1	P	F	0:02:40.930-0:02:41.196	BL	0.0147592	8	0.0552917
Trial 1	F1	P	F	0:02:41.196-0:02:41.462	BL	0.0147592	8	0.0552915
Trial 1	F1	P	F	0:02:41.462-0:02:41.728	BL	0.0129143	7	0.0552915
Trial 1	F1	P	F	0:02:41.728-0:02:41.994	BL	0.0147592	8	0.0552917
Trial 1	F1	P	F	0:02:41.994-0:02:42.260	BL	0.0147592	8	0.0552915
Trial 1	F1	P	F	0:02:42.260-0:02:42.526	BL	0.0147592	8	0.0552915
Trial 1	F1	P	F	0:02:42.526-0:02:42.792	BL	0.0147592	8	0.0552917
Trial 1	F1	P	F	0:02:42.792-0:02:43.058	BL	0.0147592	8	0.0552915
Trial 1	F1	P	F	0:02:43.058-0:02:43.324	BL	0.0147592	8	0.0552917
Trial 1	F1	P	F	0:02:43.324-0:02:43.590	BL	0.0147592	8	0.0552915
Trial 1	F1	P	F	0:02:43.590-0:02:43.856	BL	0.0147592	8	0.0552915
Trial 1	F1	P	F	0:02:43.856-0:02:44.122	BL	0.0147592	8	0.0552917
Trial 1	F1	P	F	0:02:44.122-0:02:44.388	BL	0.0147592	8	0.0552915
Trial 1	F1	P	F	0:02:44.388-0:02:44.654	BL	0.0147592	8	0.0552917
Trial 1	F1	P	F	0:02:44.654-0:02:44.920	BL	0.0147592	8	0.0552915
Trial 1	F1	P	F	0:02:44.920-0:02:45.186	BL	0.0147592	8	0.0552915
Trial 1	F1	P	F	0:02:45.186-0:02:45.452	BL	0.0147592	8	0.0552917
Trial 1	F1	P	F	0:02:45.452-0:02:45.718	BL	0.0147592	8	0.0552915
Trial 1	F1	P	F	0:02:45.718-0:02:45.984	BL	0.0147592	8	0.0552917
Trial 1	F1	P	F	0:02:45.984-0:02:46.250	BL	0.0147592	8	0.0552915
Trial 1	F1	P	F	0:02:46.250-0:02:46.516	BL	0.0147592	8	0.0552915
Trial 1	F1	P	F	0:02:46.516-0:02:46.782	BL	0.0147592	8	0.0552917
Trial 1	F1	P	F	0:02:46.782-0:02:47.048	BL	0.0147592	8	0.0552915
Trial 1	F1	P	F	0:02:47.048-0:02:47.314	BL	0.0147592	8	0.0552917
Trial 1	F1	P	F	0:02:47.314-0:02:47.580	BL	0.0147592	8	0.0552915
Trial 1	F1	P	F	0:02:47.580-0:02:47.846	BL	0.0147592	8	0.0552915
Trial 1	F1	P	F	0:02:47.846-0:02:48.112	BL	0.0147592	8	0.0552917
Trial 1	F1	P	F	0:02:48.112-0:02:48.378	BL	0.0147592	8	0.0552915
Trial 1	F1	P	F	0:02:48.378-0:02:48.644	BL	0.0147592	8	0.0552917
Trial 1	F1	P	F	0:02:48.644-0:02:48.910	BL	0.0147592	8	0.0552915
Trial 1	F1	P	F	0:02:48.910-0:02:49.176	BL	0.0147592	8	0.0552915
Trial 1	F1	P	F	0:02:49.176-0:02:49.442	BL	0.0147592	8	0.0552917
Trial 1	F1	P	F	0:02:49.442-0:02:49.708	BL	0.0147592	8	0.0552915
Trial 1	F1	P	F	0:02:49.708-0:02:49.974	BL	0.0147592	8	0.0552917
Trial 1	F1	P	F	0:02:49.974-0:02:50.240	BL	0.0147592	8	0.0552915
Trial 1	F1	P	F	0:02:50.240-0:02:50.506	BL	0.0147592	8	0.0552915
Trial 1	F1	P	F	0:02:50.506-0:02:50.772	BL	0.0147592	8	0.0552917
Trial 1	F1	P	F	0:02:50.772-0:02:51.038	BL	0.0147592	8	0.0552915
Trial 1	F1	P	F	0:02:51.038-0:02:51.304	BL	0.0129143	7	0.0552915
Trial 1	F1	P	F	0:02:51.304-0:02:51.570	BL	0.0147592	8	0.0552917
Trial 1	F1	P	F	0:02:51.570-0:02:51.836	BL	0.0147592	8	0.0552915
Trial 1	F1	P	F	0:02:51.836-0:02:52.102	BL	0.0147592	8	0.0552917
Trial 1	F1	P	F	0:02:52.102-0:02:52.368	BL	0.0147592	8	0.0552915
Trial 1	F1	P	F	0:02:52.368-0:02:52.634	BL	0.0147592	8	0.0552915
Trial 1	F1	P	F	0:02:52.634-0:02:52.900	BL	0.0147592	8	0.0552917
Trial 1	F1	P	F	0:02:52.900-0:02:53.166	BL	0.0147592	8	0.0552915
Trial 1	F1	P	F	0:02:53.166-0:02:53.432	BL	0.0147592	8	0.0552917
Trial 1	F1	P	F	0:02:53.432-0:02:53.698	BL	0.0147592	8	0.0552915
Trial 1	F1	P	F	0:02:53.698-0:02:53.964	BL	0.0147592	8	0.0552915
Trial 1	F1	P	F	0:02:53.964-0:02:54.230	BL	0.0147592	8	0.0552917
Trial 1	F1	P	F	0:02:54.230-0:02:54.496	BL	0.0147592	8	0.0552915
Trial 1	F1	P	F	0:02:54.496-0:02:54.762	BL	0.0147592	8	0.0552917
Trial 1	F1	P	F	0:02:54.762-0:02:55.028	BL	0.0147592	8	0.0552915
Trial 1	F1	P	F	0:02:55.028-0:02:55.294	BL	0.0147592	8	0.0552915
Trial 1	F1	P	F	0:02:55.294-0:02:55.560	BL	0.0147592	8	0.0552917
Trial 1	F1	P	F	0:02:55.560-0:02:55.826	BL	0.0147592	8	0.0552915
Trial 1	F1	P	F	0:02:55.826-0:02:56.092	BL	0.0147592	8	0.0552917
Trial 1	F1	P	F	0:02:56.092-0:02:56.358	BL	0.0147592	8	0.0552915
Trial 1	F1	P	F	0:02:56.358-0:02:56.624	BL	0.0147592	8	0.0552915
Trial 1	F1	P	F	0:02:56.624-0:02:56.890	BL	0.0147592	8	0.0552917
Trial 1	F1	P	F	0:02:56.890-0:02:57.156	BL	0.0147592	8	0.0552915
Trial 1	F1	P	F	0:02:57.156-0:02:57.422	BL	0.0147592	8	0.0552917
Trial 1	F1	P	F	0:02:57.422-0:02:57.688	BL	0.0147592	8	0.0552915
Trial 1	F1	P	F	0:02:57.688-0:02:57.954	BL	0.0147592	8	0.0552915
Trial 1	F1	P	F	0:02:57.954-0:02:58.220	BL	0.0147592	8	0.0552917
Trial 1	F1	P	F	0:02:58.220-0:02:58.486	BL	0.0147592	8	0.0552915
Trial 1	F1	P	F	0:02:58.486-0:02:58.752	BL	0.0147592	8	0.0552917
Trial 1	F1	P	F	0:02:58.752-0:02:59.018	BL	0.0147592	8	0.0552915
Trial 1	F1	P	F	0:02:59.018-0:02:59.284	BL	0.0147592	8	0.0552915
Trial 1	F1	P	F	0:02:59.284-0:02:59.550	BL	0.0147592	8	0.0552917
Trial 1	F1	P	F	0:02:59.550-0:02:59.816	BL	0.0147592	8	0.0552915
Trial 1	F1	P	F	0:02:59.816-0:03:00.082	CS1a	0.0147592	8	0.0552917
Trial 1	F1	P	F	0:03:00.082-0:03:00.348	CS1a	1.63877	8	6.13925
Trial 1	F1	P	F	0:03:00.348-0:03:00.614	CS1a	0.489261	8	1.83289
Trial 1	F1	P	F	0:03:00.614-0:03:00.880	CS1a	0.663713	7	2.84166
Trial 1	F1	P	F	0:03:00.880-0:03:01.146	CS1a	0.024671	8	0.0924245
Trial 1	F1	P	F	0:03:01.146-0:03:01.412	CS1a	0.0174161	8	0.0652451
Trial 1	F1	P	F	0:03:01.412-0:03:01.678	CS1a	0.0174161	8	0.0652453
Trial 1	F1	P	F	0:03:01.678-0:03:01.944	CS1a	0.0174161	8	0.0652451
Trial 1	F1	P	F	0:03:01.944-0:03:02.210	CS1a	0.0174161	8	0.0652451
Trial 1	F1	P	F	0:03:02.210-0:03:02.476	CS1a	0.0174161	8	0.0652453
Trial 1	F1	P	F	0:03:02.476-0:03:02.742	CS1a	0.0174161	8	0.0652451
Trial 1	F1	P	F	0:03:02.742-0:03:03.008	CS1a	0.141609	8	0.530504
Trial 1	F1	P	F	0:03:03.008-0:03:03.274	CS1a	0.129211	8	0.484055
Trial 1	F1	P	F	0:03:03.274-0:03:03.540	CS1a	0.129211	8	0.484055
Trial 1	F1	P	F	0:03:03.540-0:03:03.806	CS1a	0.129211	8	0.484056
Trial 1	F1	P	F	0:03:03.806-0:03:04.072	CS1a	0.129211	8	0.484055
Trial 1	F1	P	F	0:03:04.072-0:03:04.338	CS1a	0.129211	8	0.484056
Trial 1	F1	P	F	0:03:04.338-0:03:04.604	CS1a	0.129211	8	0.484055
Trial 1	F1	P	F	0:03:04.604-0:03:04.870	CS1a	0.129211	8	0.484055
Trial 1	F1	P	F	0:03:04.870-0:03:05.136	CS1a	0.129211	8	0.484056
Trial 1	F1	P	F	0:03:05.136-0:03:05.402	CS1a	0.129211	8	0.484055
Trial 1	F1	P	F	0:03:05.402-0:03:05.668	CS1a	0.129211	8	0.484056
Trial 1	F1	P	F	0:03:05.668-0:03:05.934	CS1a	0.129211	8	0.484055
Trial 1	F1	P	F	0:03:05.934-0:03:06.200	CS1a	3.11726	8	11.6781
Trial 1	F1	P	F	0:03:06.200-0:03:06.466	CS1a	24.483	8	91.7194
Trial 1	F1	P	F	0:03:06.466-0:03:06.732	CS1a	22.5053	8	84.3106
Trial 1	F1	P	F	0:03:06.732-0:03:06.998	CS1a	20.6969	8	77.5357
Trial 1	F1	P	F	0:03:06.998-0:03:07.264	CS1a	3.78006	8	14.161
Trial 1	F1	P	F	0:03:07.264-0:03:07.530	CS1a	0.659455	8	2.47048
Trial 1	F1	P	F	0:03:07.530-0:03:07.796	CS1a	20.6223	8	77.2562
Trial 1	F1	P	F	0:03:07.796-0:03:08.062	CS1a	4.62604	8	17.3303
Trial 1	F1	P	F	0:03:08.062-0:03:08.328	CS1a	0.829648	8	3.10807
Trial 1	F1	P	F	0:03:08.328-0:03:08.594	CS1a	0.258522	8	0.968484
Trial 1	F1	P	F	0:03:08.594-0:03:08.860	CS1a	0.0652576	8	0.244473
Trial 1	F1	P	F	0:03:08.860-0:03:09.126	CS1a	0.036043	8	0.135027
Trial 1	F1	P	F	0:03:09.126-0:03:09.392	CS1a	0.0767466	8	0.28751
Trial 1	F1	P	F	0:03:09.392-0:03:09.658	CS1a	0.0453007	8	0.169709
Trial 1	F1	P	F	0:03:09.658-0:03:09.924	CS1a	0.0801101	8	0.300113
Trial 1	F1	P	F	0:03:09.924-0:03:10.190	CS1a	0.0230041	7	0.09849
Trial 1	F1	P	F	0:03:10.190-0:03:10.456	IT1	0.08837	8	0.331055
Trial 1	F1	P	F	0:03:10.456-0:03:10.722	IT1	0.0826764	8	0.309725
Trial 1	F1	P	F	0:03:10.722-0:03:10.988	IT1	0.136264	8	0.510481
Trial 1	F1	P	F	0:03:10.988-0:03:11.254	IT1	0.0700249	8	0.262332
Trial 1	F1	P	F	0:03:11.254-0:03:11.520	IT1	0.0469213	8	0.175778
Trial 1	F1	P	F	0:03:11.520-0:03:11.786	IT1	0.138237	8	0.517869
Trial 1	F1	P	F	0:03:11.786-0:03:12.052	IT1	0.137546	8	0.51528
Trial 1	F1	P	F	0:03:12.052-0:03:12.318	IT1	0.144112	8	0.539877
Trial 1	F1	P	F	0:03:12.318-0:03:12.584	IT1	0.0550297	8	0.206156
Trial 1	F1	P	F	0:03:12.584-0:03:12.850	IT1	0.064789	8	0.242714
Trial 1	F1	P	F	0:03:12.850-0:03:13.116	IT1	0.046421	8	0.173904
Trial 1	F1	P	F	0:03:13.116-0:03:13.382	IT1	0.0346856	8	0.129941
Trial 1	F1	P	F	0:03:13.382-0:03:13.648	IT1	0.0194356	8	0.0728107
Trial 1	F1	P	F	0:03:13.648-0:03:13.914	IT1	0.0479122	8	0.179491
Trial 1	F1	P	F	0:03:13.914-0:03:14.180	IT1	0.083111	8	0.311355
Trial 1	F1	P	F	0:03:14.180-0:03:14.446	IT1	0.0666796	8	0.249797
Trial 1	F1	P	F	0:03:14.446-0:03:14.712	IT1	0.0922669	8	0.345656
Trial 1	F1	P	F	0:03:14.712-0:03:14.978	IT1	0.0587496	8	0.22009
Trial 1	F1	P	F	0:03:14.978-0:03:15.244	IT1	0.113805	8	0.426342
Trial 1	F1	P	F	0:03:15.244-0:03:15.510	IT1	0.103279	8	0.386909
Trial 1	F1	P	F	0:03:15.510-0:03:15.776	IT1	0.0726481	8	0.272157
Trial 1	F1	P	F	0:03:15.776-0:03:16.042	IT1	0.0679364	8	0.254506
Trial 1	F1	P	F	0:03:16.042-0:03:16.308	IT1	0.0797945	8	0.298931
Trial 1	F1	P	F	0:03:16.308-0:03:16.574	IT1	0.102844	8	0.385277
Trial 1	F1	P	F	0:03:16.574-0:03:16.840	IT1	0.0465075	8	0.174228
Trial 1	F1	P	F	0:03:16.840-0:03:17.106	IT1	0.107608	8	0.403132
Trial 1	F1	P	F	0:03:17.106-0:03:17.372	IT1	0.128517	8	0.481453
Trial 1	F1	P	F	0:03:17.372-0:03:17.638	IT1	0.0969552	8	0.363217
Trial 1	F1	P	F	0:03:17.638-0:03:17.904	IT1	0.0452871	8	0.169658
Trial 1	F1	P	F	0:03:17.904-0:03:18.170	IT1	0.0199497	8	0.0747368
Trial 1	F1	P	F	0:03:18.170-0:03:18.436	IT1	0.0449657	8	0.168453
Trial 1	F1	P	F	0:03:18.436-0:03:18.702	IT1	0.039201	8	0.146856
Trial 1	F1	P	F	0:03:18.702-0:03:18.968	IT1	0.0440849	8	0.165152
Trial 1	F1	P	F	0:03:18.968-0:03:19.234	IT1	0.055617	8	0.208356
Trial 1	F1	P	F	0:03:19.234-0:03:19.500	IT1	0.0367891	8	0.137821
Trial 1	F1	P	F	0:03:19.500-0:03:19.766	IT1	0.108773	7	0.465706
Trial 1	F1	P	F	0:03:19.766-0:03:20.032	IT1	0.0393583	8	0.147447
Trial 1	F1	P	F	0:03:20.032-0:03:20.298	IT1	0.0777283	8	0.29119
Trial 1	F1	P	F	0:03:20.298-0:03:20.564	IT1	0.12113	8	0.453783
Trial 1	F1	P	F	0:03:20.564-0:03:20.830	IT1	0.0846064	8	0.316956
Trial 1	F1	P	F	0:03:20.830-0:03:21.096	IT1	0.0832683	8	0.311943
Trial 1	F1	P	F	0:03:21.096-0:03:21.362	IT1	0.0791818	8	0.296634
Trial 1	F1	P	F	0:03:21.362-0:03:21.628	IT1	0.156217	8	0.585225
Trial 1	F1	P	F	0:03:21.628-0:03:21.894	IT1	0.152732	8	0.572168
Trial 1	F1	P	F	0:03:21.894-0:03:22.160	IT1	0.129043	8	0.483428
Trial 1	F1	P	F	0:03:22.160-0:03:22.426	IT1	0.108154	8	0.405171
Trial 1	F1	P	F	0:03:22.426-0:03:22.692	IT1	0.130275	8	0.488042
Trial 1	F1	P	F	0:03:22.692-0:03:22.958	IT1	0.219319	8	0.821625
Trial 1	F1	P	F	0:03:22.958-0:03:23.224	IT1	0.301038	8	1.12776
Trial 1	F1	P	F	0:03:23.224-0:03:23.490	IT1	0.376221	8	1.40942
Trial 1	F1	P	F	0:03:23.490-0:03:23.756	IT1	0.426721	8	1.5986
Trial 1	F1	P	F	0:03:23.756-0:03:24.022	IT1	0.507669	8	1.90186
Trial 1	F1	P	F	0:03:24.022-0:03:24.288	IT1	0.918246	8	3.43998
Trial 1	F1	P	F	0:03:24.288-0:03:24.554	IT1	1.04406	8	3.9113
Trial 1	F1	P	F	0:03:24.554-0:03:24.820	IT1	1.23587	8	4.62988
Trial 1	F1	P	F	0:03:24.820-0:03:25.086	IT1	0.893441	8	3.34704
Trial 1	F1	P	F	0:03:25.086-0:03:25.352	IT1	0.420212	8	1.57422
Trial 1	F1	P	F	0:03:25.352-0:03:25.618	IT1	0.22432	8	0.840354
Trial 1	F1	P	F	0:03:25.618-0:03:25.884	IT1	1.53564	8	5.7529
Trial 1	F1	P	F	0:03:25.884-0:03:26.150	IT1	1.20042	8	4.4971
Trial 1	F1	P	F	0:03:26.150-0:03:26.416	IT1	0.451664	8	1.69204
Trial 1	F1	P	F	0:03:26.416-0:03:26.682	IT1	0.93456	8	3.50109
Trial 1	F1	P	F	0:03:26.682-0:03:26.948	IT1	0.3559	8	1.33328
Trial 1	F1	P	F	0:03:26.948-0:03:27.214	IT1	0.500412	8	1.87466
Trial 1	F1	P	F	0:03:27.214-0:03:27.480	IT1	0.602001	8	2.25526
Trial 1	F1	P	F	0:03:27.480-0:03:27.746	IT1	0.522691	8	1.95813
Trial 1	F1	P	F	0:03:27.746-0:03:28.012	IT1	0.375403	8	1.40635
Trial 1	F1	P	F	0:03:28.012-0:03:28.278	IT1	0.257739	8	0.965551
Trial 1	F1	P	F	0:03:28.278-0:03:28.544	IT1	0.289367	8	1.08404
Trial 1	F1	P	F	0:03:28.544-0:03:28.810	IT1	0.257998	8	0.966531
Trial 1	F1	P	F	0:03:28.810-0:03:29.076	IT1	0.289904	8	1.08605
Trial 1	F1	P	F	0:03:29.076-0:03:29.342	IT1	0.745921	7	3.1936
Trial 1	F1	P	F	0:03:29.342-0:03:29.608	IT1	0.234663	8	0.879112
Trial 1	F1	P	F	0:03:29.608-0:03:29.874	IT1	0.235574	8	0.882518
Trial 1	F1	P	F	0:03:29.874-0:03:30.140	IT1	0.716767	8	2.68519
Trial 1	F1	P	F	0:03:30.140-0:03:30.406	IT1	0.439346	8	1.6459
Trial 1	F1	P	F	0:03:30.406-0:03:30.672	IT1	0.818773	8	3.06733
Trial 1	F1	P	F	0:03:30.672-0:03:30.938	IT1	0.68911	8	2.58159
Trial 1	F1	P	F	0:03:30.938-0:03:31.204	IT1	0.678349	8	2.54126
Trial 1	F1	P	F	0:03:31.204-0:03:31.470	IT1	0.140201	8	0.525227
Trial 1	F1	P	F	0:03:31.470-0:03:31.736	IT1	1.22944	8	4.6058
Trial 1	F1	P	F	0:03:31.736-0:03:32.002	IT1	2.47964	8	9.28934
Trial 1	F1	P	F	0:03:32.002-0:03:32.268	IT1	0.470012	8	1.7608
Trial 1	F1	P	F	0:03:32.268-0:03:32.534	IT1	0.901042	8	3.37553
Trial 1	F1	P	F	0:03:32.534-0:03:32.800	IT1	0.805834	8	3.01886
Trial 1	F1	P	F	0:03:32.800-0:03:33.066	IT1	0.788962	8	2.95565
Trial 1	F1	P	F	0:03:33.066-0:03:33.332	IT1	0.522396	8	1.95702
Trial 1	F1	P	F	0:03:33.332-0:03:33.598	IT1	0.744336	8	2.78848
Trial 1	F1	P	F	0:03:33.598-0:03:33.864	IT1	0.353315	8	1.3236
Trial 1	F1	P	F	0:03:33.864-0:03:34.130	IT1	0.492996	8	1.8469
Trial 1	F1	P	F	0:03:34.130-0:03:34.396	IT1	0.684805	8	2.56545
Trial 1	F1	P	F	0:03:34.396-0:03:34.662	IT1	0.454432	8	1.70241
Trial 1	F1	P	F	0:03:34.662-0:03:34.928	IT1	0.645248	8	2.41727
Trial 1	F1	P	F	0:03:34.928-0:03:35.194	IT1	0.294944	8	1.10493
Trial 1	F1	P	F	0:03:35.194-0:03:35.460	IT1	0.235021	8	0.88045
Trial 1	F1	P	F	0:03:35.460-0:03:35.726	IT1	0.547059	8	2.04941
Trial 1	F1	P	F	0:03:35.726-0:03:35.992	IT1	0.296259	8	1.10985
Trial 1	F1	P	F	0:03:35.992-0:03:36.258	IT1	0.571003	8	2.13913
Trial 1	F1	P	F	0:03:36.258-0:03:36.524	IT1	0.278385	8	1.04289
Trial 1	F1	P	F	0:03:36.524-0:03:36.790	IT1	0.619129	8	2.31941
Trial 1	F1	P	F	0:03:36.790-0:03:37.056	IT1	0.739242	8	2.7694
Trial 1	F1	P	F	0:03:37.056-0:03:37.322	IT1	0.617223	8	2.31227
Trial 1	F1	P	F	0:03:37.322-0:03:37.588	IT1	1.57899	8	5.91533
Trial 1	F1	P	F	0:03:37.588-0:03:37.854	IT1	1.19789	8	4.48761
Trial 1	F1	P	F	0:03:37.854-0:03:38.120	IT1	0.939344	8	3.51902
Trial 1	F1	P	F	0:03:38.120-0:03:38.386	IT1	0.751682	8	2.81598
Trial 1	F1	P	F	0:03:38.386-0:03:38.652	IT1	0.863636	8	3.23539
Trial 1	F1	P	F	0:03:38.652-0:03:38.918	IT1	1.15409	7	4.94114
Trial 1	F1	P	F	0:03:38.918-0:03:39.184	IT1	0.733269	8	2.74701
Trial 1	F1	P	F	0:03:39.184-0:03:39.450	IT1	1.07857	8	4.04059
Trial 1	F1	P	F	0:03:39.450-0:03:39.716	IT1	0.582598	8	2.18257
Trial 1	F1	P	F	0:03:39.716-0:03:39.982	IT1	2.30587	8	8.63838
Trial 1	F1	P	F	0:03:39.982-0:03:40.248	IT1	2.12017	8	7.94277
Trial 1	F1	P	F	0:03:40.248-0:03:40.514	IT1	0.819538	8	3.0702
Trial 1	F1	P	F	0:03:40.514-0:03:40.780	IT1	2.59669	8	9.72788
Trial 1	F1	P	F	0:03:40.780-0:03:41.046	IT1	3.36383	8	12.6019
Trial 1	F1	P	F	0:03:41.046-0:03:41.312	IT1	5.76965	8	21.6144
Trial 1	F1	P	F	0:03:41.312-0:03:41.578	IT1	1.73168	8	6.48729
Trial 1	F1	P	F	0:03:41.578-0:03:41.844	IT1	0.898923	8	3.3676
Trial 1	F1	P	F	0:03:41.844-0:03:42.110	IT1	1.08611	8	4.06884
Trial 1	F1	P	F	0:03:42.110-0:03:42.376	IT1	2.97514	8	11.1456
Trial 1	F1	P	F	0:03:42.376-0:03:42.642	IT1	1.95009	8	7.30554
Trial 1	F1	P	F	0:03:42.642-0:03:42.908	IT1	1.40269	8	5.25482
Trial 1	F1	P	F	0:03:42.908-0:03:43.174	IT1	0.942224	8	3.52982
Trial 1	F1	P	F	0:03:43.174-0:03:43.440	IT1	1.63739	8	6.13405
Trial 1	F1	P	F	0:03:43.440-0:03:43.706	IT1	0.815789	8	3.05616
Trial 1	F1	P	F	0:03:43.706-0:03:43.972	IT1	0.571525	8	2.14107
Trial 1	F1	P	F	0:03:43.972-0:03:44.238	IT1	0.688166	8	2.57804
Trial 1	F1	P	F	0:03:44.238-0:03:44.504	IT1	1.12714	8	4.22256
Trial 1	F1	P	F	0:03:44.504-0:03:44.770	IT1	0.88784	8	3.32606
Trial 1	F1	P	F	0:03:44.770-0:03:45.036	IT1	0.249498	8	0.934685
Trial 1	F1	P	F	0:03:45.036-0:03:45.302	IT1	0.145772	8	0.546097
Trial 1	F1	P	F	0:03:45.302-0:03:45.568	IT1	0.149179	8	0.558859
Trial 1	F1	P	F	0:03:45.568-0:03:45.834	IT1	0.353503	8	1.32432
Trial 1	F1	P	F	0:03:45.834-0:03:46.100	IT1	1.45239	8	5.44103
Trial 1	F1	P	F	0:03:46.100-0:03:46.366	IT1	1.12108	8	4.19987
Trial 1	F1	P	F	0:03:46.366-0:03:46.632	IT1	1.52127	8	5.69905
Trial 1	F1	P	F	0:03:46.632-0:03:46.898	IT1	2.69211	8	10.0853
Trial 1	F1	P	F	0:03:46.898-0:03:47.164	IT1	2.45365	8	9.192
Trial 1	F1	P	F	0:03:47.164-0:03:47.430	IT1	2.23013	8	8.35462
Trial 1	F1	P	F	0:03:47.430-0:03:47.696	IT1	1.05637	8	3.95744
Trial 1	F1	P	F	0:03:47.696-0:03:47.962	IT1	0.605209	8	2.26727
Trial 1	F1	P	F	0:03:47.962-0:03:48.228	IT1	0.792264	7	3.392
Trial 1	F1	P	F	0:03:48.228-0:03:48.494	IT1	0.671434	8	2.51536
Trial 1	F1	P	F	0:03:48.494-0:03:48.760	IT1	0.470305	8	1.76187
Trial 1	F1	P	F	0:03:48.760-0:03:49.026	IT1	0.270275	8	1.01251
Trial 1	F1	P	F	0:03:49.026-0:03:49.292	IT1	0.158796	8	0.594891
Trial 1	F1	P	F	0:03:49.292-0:03:49.558	IT1	0.156893	8	0.587758
Trial 1	F1	P	F	0:03:49.558-0:03:49.824	IT1	0.120968	8	0.453176
Trial 1	F1	P	F	0:03:49.824-0:03:50.090	IT1	0.144034	8	0.539585
Trial 1	F1	P	F	0:03:50.090-0:03:50.356	IT1	0.200855	8	0.752453
Trial 1	F1	P	F	0:03:50.356-0:03:50.622	IT1	0.186735	8	0.699559
Trial 1	F1	P	F	0:03:50.622-0:03:50.888	IT1	0.81393	8	3.04917
Trial 1	F1	P	F	0:03:50.888-0:03:51.154	IT1	0.968595	8	3.62863
Trial 1	F1	P	F	0:03:51.154-0:03:51.420	IT1	0.470089	8	1.76106
Trial 1	F1	P	F	0:03:51.420-0:03:51.686	IT1	0.503809	8	1.88738
Trial 1	F1	P	F	0:03:51.686-0:03:51.952	IT1	0.723986	8	2.71225
Trial 1	F1	P	F	0:03:51.952-0:03:52.218	IT1	1.13061	8	4.23552
Trial 1	F1	P	F	0:03:52.218-0:03:52.484	IT1	0.819022	8	3.06828
Trial 1	F1	P	F	0:03:52.484-0:03:52.750	IT1	0.79516	8	2.97887
Trial 1	F1	P	F	0:03:52.750-0:03:53.016	IT1	0.906997	8	3.39783
Trial 1	F1	P	F	0:03:53.016-0:03:53.282	IT1	1.04025	8	3.89705
Trial 1	F1	P	F	0:03:53.282-0:03:53.548	IT1	0.892004	8	3.34167
Trial 1	F1	P	F	0:03:53.548-0:03:53.814	IT1	0.27222	8	1.0198
Trial 1	F1	P	F	0:03:53.814-0:03:54.080	IT1	0.42945	8	1.60883
Trial 1	F1	P	F	0:03:54.080-0:03:54.346	IT1	0.787261	8	2.94927
Trial 1	F1	P	F	0:03:54.346-0:03:54.612	IT1	0.673269	8	2.52225
Trial 1	F1	P	F	0:03:54.612-0:03:54.878	IT1	0.288056	8	1.07913
Trial 1	F1	P	F	0:03:54.878-0:03:55.144	IT1	0.434876	8	1.62916
Trial 1	F1	P	F	0:03:55.144-0:03:55.410	IT1	1.76972	8	6.62977
Trial 1	F1	P	F	0:03:55.410-0:03:55.676	IT1	1.6761	8	6.27913
Trial 1	F1	P	F	0:03:55.676-0:03:55.942	IT1	0.497719	8	1.86458
Trial 1	F1	P	F	0:03:55.942-0:03:56.208	IT1	1.02885	8	3.85433
Trial 1	F1	P	F	0:03:56.208-0:03:56.474	IT1	0.592207	8	2.21855
Trial 1	F1	P	F	0:03:56.474-0:03:56.740	IT1	0.537613	8	2.01404
Trial 1	F1	P	F	0:03:56.740-0:03:57.006	IT1	1.03502	8	3.87742
Trial 1	F1	P	F	0:03:57.006-0:03:57.272	IT1	2.16366	8	8.1056
Trial 1	F1	P	F	0:03:57.272-0:03:57.538	IT1	0.719818	8	2.69662
Trial 1	F1	P	F	0:03:57.538-0:03:57.804	IT1	0.373703	7	1.59999
Trial 1	F1	P	F	0:03:57.804-0:03:58.070	IT1	0.466302	8	1.7469
Trial 1	F1	P	F	0:03:58.070-0:03:58.336	IT1	0.83828	8	3.14041
Trial 1	F1	P	F	0:03:58.336-0:03:58.602	IT1	0.650842	8	2.43821
Trial 1	F1	P	F	0:03:58.602-0:03:58.868	IT1	1.14731	8	4.29811
Trial 1	F1	P	F	0:03:58.868-0:03:59.134	IT1	0.776519	8	2.90902
Trial 1	F1	P	F	0:03:59.134-0:03:59.400	IT1	2.13174	8	7.98607
Trial 1	F1	P	F	0:03:59.400-0:03:59.666	IT1	1.52573	8	5.71576
Trial 1	F1	P	F	0:03:59.666-0:03:59.932	IT1	0.842129	8	3.15483
Trial 1	F1	P	F	0:03:59.932-0:04:00.198	IT1	0.620927	8	2.32614
Trial 1	F1	P	F	0:04:00.198-0:04:00.464	IT1	0.834721	8	3.12707
Trial 1	F1	P	F	0:04:00.464-0:04:00.730	IT1	0.950052	8	3.55915
Trial 1	F1	P	F	0:04:00.730-0:04:00.996	IT1	2.10883	8	7.90022
Trial 1	F1	P	F	0:04:00.996-0:04:01.262	IT1	1.87581	8	7.02724
Trial 1	F1	P	F	0:04:01.262-0:04:01.528	IT1	2.03241	8	7.61398
Trial 1	F1	P	F	0:04:01.528-0:04:01.794	IT1	1.80994	8	6.78047
Trial 1	F1	P	F	0:04:01.794-0:04:02.060	IT1	0.665277	8	2.49231
Trial 1	F1	P	F	0:04:02.060-0:04:02.326	IT1	1.87983	8	7.0423
Trial 1	F1	P	F	0:04:02.326-0:04:02.592	IT1	1.79355	8	6.71907
Trial 1	F1	P	F	0:04:02.592-0:04:02.858	IT1	0.492974	8	1.84682
Trial 1	F1	P	F	0:04:02.858-0:04:03.124	IT1	0.207312	8	0.776641
Trial 1	F1	P	F	0:04:03.124-0:04:03.390	IT1	0.198823	8	0.744842
Trial 1	F1	P	F	0:04:03.390-0:04:03.656	IT1	0.368813	8	1.38167
Trial 1	F1	P	F	0:04:03.656-0:04:03.922	IT1	0.796979	8	2.98568
Trial 1	F1	P	F	0:04:03.922-0:04:04.188	IT1	0.419585	8	1.57187
Trial 1	F1	P	F	0:04:04.188-0:04:04.454	IT1	0.516952	8	1.93663
Trial 1	F1	P	F	0:04:04.454-0:04:04.720	IT1	0.174234	8	0.652726
Trial 1	F1	P	F	0:04:04.720-0:04:04.986	IT1	0.0406523	8	0.152293
Trial 1	F1	P	F	0:04:04.986-0:04:05.252	IT1	0.0794278	8	0.297558
Trial 1	F1	P	F	0:04:05.252-0:04:05.518	IT1	0.0389706	8	0.145994
Trial 1	F1	P	F	0:04:05.518-0:04:05.784	IT1	0.0622608	8	0.233244
Trial 1	F1	P	F	0:04:05.784-0:04:06.050	IT1	0.0285498	8	0.106955
Trial 1	F1	P	F	0:04:06.050-0:04:06.316	IT1	0.0421856	8	0.158038
Trial 1	F1	P	F	0:04:06.316-0:04:06.582	IT1	0.0711406	8	0.26651
Trial 1	F1	P	F	0:04:06.582-0:04:06.848	IT1	0.0550334	8	0.206169
Trial 1	F1	P	F	0:04:06.848-0:04:07.114	IT1	0.0612978	8	0.229636
Trial 1	F1	P	F	0:04:07.114-0:04:07.380	IT1	0.0542464	7	0.232251
Trial 1	F1	P	F	0:04:07.380-0:04:07.646	IT1	0.0611008	8	0.228898
Trial 1	F1	P	F	0:04:07.646-0:04:07.912	IT1	0.0321863	8	0.120578
Trial 1	F1	P	F	0:04:07.912-0:04:08.178	IT1	0.0758525	8	0.284164
Trial 1	F1	P	F	0:04:08.178-0:04:08.444	IT1	0.0801573	8	0.30029
Trial 1	F1	P	F	0:04:08.444-0:04:08.710	IT1	0.0569421	8	0.213319
Trial 1	F1	P	F	0:04:08.710-0:04:08.976	IT1	0.0742889	8	0.278304
Trial 1	F1	P	F	0:04:08.976-0:04:09.242	IT1	0.0497246	8	0.186281
Trial 1	F1	P	F	0:04:09.242-0:04:09.508	IT1	0.0957214	8	0.358598
Trial 1	F1	P	F	0:04:09.508-0:04:09.774	IT1	0.0425441	8	0.15938
Trial 1	F1	P	F	0:04:09.774-0:04:10.040	IT1	0.0638445	8	0.239177
Trial 1	F1	P	F	0:04:10.040-0:04:10.306	IT1	0.0262691	8	0.0984106
Trial 1	F1	P	F	0:04:10.306-0:04:10.572	IT1	0.057786	8	0.21648
Trial 1	F1	P	F	0:04:10.572-0:04:10.838	IT1	0.0798412	8	0.299104
Trial 1	F1	P	F	0:04:10.838-0:04:11.104	IT1	0.0336358	8	0.126008
Trial 1	F1	P	F	0:04:11.104-0:04:11.370	IT1	0.0357992	8	0.134112
Trial 1	F1	P	F	0:04:11.370-0:04:11.636	IT1	0.0245651	8	0.0920271
Trial 1	F1	P	F	0:04:11.636-0:04:11.902	IT1	0.0985253	8	0.3691
Trial 1	F1	P	F	0:04:11.902-0:04:12.168	IT1	0.0707408	8	0.265013
Trial 1	F1	P	F	0:04:12.168-0:04:12.434	IT1	0.229941	8	0.861414
Trial 1	F1	P	F	0:04:12.434-0:04:12.700	IT1	0.138868	8	0.520233
Trial 1	F1	P	F	0:04:12.700-0:04:12.966	IT1	0.288397	8	1.08041
Trial 1	F1	P	F	0:04:12.966-0:04:13.232	IT1	0.208227	8	0.78007
Trial 1	F1	P	F	0:04:13.232-0:04:13.498	IT1	0.37297	8	1.39724
Trial 1	F1	P	F	0:04:13.498-0:04:13.764	IT1	0.708522	8	2.65429
Trial 1	F1	P	F	0:04:13.764-0:04:14.030	IT1	1.01536	8	3.80378
Trial 1	F1	P	F	0:04:14.030-0:04:14.296	IT1	1.11966	8	4.19452
Trial 1	F1	P	F	0:04:14.296-0:04:14.562	IT1	0.2104	8	0.78821
Trial 1	F1	P	F	0:04:14.562-0:04:14.828	IT1	0.563417	8	2.11071
Trial 1	F1	P	F	0:04:14.828-0:04:15.094	IT1	1.22003	8	4.57052
Trial 1	F1	P	F	0:04:15.094-0:04:15.360	IT1	0.618717	8	2.31787
Trial 1	F1	P	F	0:04:15.360-0:04:15.626	IT1	0.687343	8	2.57497
Trial 1	F1	P	F	0:04:15.626-0:04:15.892	IT1	0.367855	8	1.37807
Trial 1	F1	P	F	0:04:15.892-0:04:16.158	IT1	0.300972	8	1.12752
Trial 1	F1	P	F	0:04:16.158-0:04:16.424	IT1	0.588077	8	2.20308
Trial 1	F1	P	F	0:04:16.424-0:04:16.690	IT1	0.382566	7	1.63792
Trial 1	F1	P	F	0:04:16.690-0:04:16.956	IT1	0.502415	8	1.88217
Trial 1	F1	P	F	0:04:16.956-0:04:17.222	IT1	0.631486	8	2.36571
Trial 1	F1	P	F	0:04:17.222-0:04:17.488	IT1	0.554696	8	2.07803
Trial 1	F1	P	F	0:04:17.488-0:04:17.754	IT1	1.48395	8	5.55924
Trial 1	F1	P	F	0:04:17.754-0:04:18.020	IT1	2.5201	8	9.4409
Trial 1	F1	P	F	0:04:18.020-0:04:18.286	IT1	0.727394	8	2.72499
Trial 1	F1	P	F	0:04:18.286-0:04:18.552	IT1	0.811317	8	3.03939
Trial 1	F1	P	F	0:04:18.552-0:04:18.818	IT1	0.450865	8	1.68905
Trial 1	F1	P	F	0:04:18.818-0:04:19.084	IT1	0.52494	8	1.96656
Trial 1	F1	P	F	0:04:19.084-0:04:19.350	IT1	0.649349	8	2.43262
Trial 1	F1	P	F	0:04:19.350-0:04:19.616	IT1	0.451453	8	1.69125
Trial 1	F1	P	F	0:04:19.616-0:04:19.882	IT1	1.13976	8	4.26981
Trial 1	F1	P	F	0:04:19.882-0:04:20.148	IT1	1.20282	8	4.50604
Trial 1	F1	P	F	0:04:20.148-0:04:20.414	IT1	0.938497	8	3.51585
Trial 1	F1	P	F	0:04:20.414-0:04:20.680	IT1	0.900097	8	3.37201
Trial 1	F1	P	F	0:04:20.680-0:04:20.946	IT1	0.510563	8	1.91269
Trial 1	F1	P	F	0:04:20.946-0:04:21.212	IT1	2.26806	8	8.49676
Trial 1	F1	P	F	0:04:21.212-0:04:21.478	IT1	0.900957	8	3.37521
Trial 1	F1	P	F	0:04:21.478-0:04:21.744	IT1	0.331836	8	1.24315
Trial 1	F1	P	F	0:04:21.744-0:04:22.010	IT1	2.69537	8	10.0976
Trial 1	F1	P	F	0:04:22.010-0:04:22.276	IT1	2.39896	8	8.98714
Trial 1	F1	P	F	0:04:22.276-0:04:22.542	IT1	2.21638	8	8.30314
Trial 1	F1	P	F	0:04:22.542-0:04:22.808	IT1	1.05336	8	3.94615
Trial 1	F1	P	F	0:04:22.808-0:04:23.074	IT1	2.26475	8	8.48443
Trial 1	F1	P	F	0:04:23.074-0:04:23.340	IT1	2.48958	8	9.32658
Trial 1	F1	P	F	0:04:23.340-0:04:23.606	IT1	1.29545	8	4.85306
Trial 1	F1	P	F	0:04:23.606-0:04:23.872	IT1	1.71375	8	6.42017
Trial 1	F1	P	F	0:04:23.872-0:04:24.138	IT1	1.45967	8	5.4683
Trial 1	F1	P	F	0:04:24.138-0:04:24.404	IT1	1.06446	8	3.98777
Trial 1	F1	P	F	0:04:24.404-0:04:24.670	IT1	1.80471	8	6.7609
Trial 1	F1	P	F	0:04:24.670-0:04:24.936	IT1	2.3662	8	8.86435
Trial 1	F1	P	F	0:04:24.936-0:04:25.202	IT1	1.06053	8	3.97304
Trial 1	F1	P	F	0:04:25.202-0:04:25.468	IT1	0.510906	8	1.91398
Trial 1	F1	P	F	0:04:25.468-0:04:25.734	IT1	0.219387	8	0.82188
Trial 1	F1	P	F	0:04:25.734-0:04:26.000	IT1	0.316121	8	1.18427
Trial 1	F1	P	F	0:04:26.000-0:04:26.266	IT1	0.13099	7	0.560824
Trial 1	F1	P	F	0:04:26.266-0:04:26.532	IT1	0.0741628	8	0.277833
Trial 1	F1	P	F	0:04:26.532-0:04:26.798	IT1	0.0884633	8	0.331406
Trial 1	F1	P	F	0:04:26.798-0:04:27.064	IT1	0.0657813	8	0.246434
Trial 1	F1	P	F	0:04:27.064-0:04:27.330	IT1	0.0445387	8	0.166853
Trial 1	F1	P	F	0:04:27.330-0:04:27.596	IT1	0.112599	8	0.421821
Trial 1	F1	P	F	0:04:27.596-0:04:27.862	IT1	0.201947	8	0.756546
Trial 1	F1	P	F	0:04:27.862-0:04:28.128	IT1	0.449553	8	1.68413
Trial 1	F1	P	F	0:04:28.128-0:04:28.394	IT1	1.43985	8	5.39404
Trial 1	F1	P	F	0:04:28.394-0:04:28.660	IT1	0.72613	8	2.72027
Trial 1	F1	P	F	0:04:28.660-0:04:28.926	IT1	0.915136	8	3.42832
Trial 1	F1	P	F	0:04:28.926-0:04:29.192	IT1	0.947586	8	3.54991
Trial 1	F1	P	F	0:04:29.192-0:04:29.458	IT1	1.28556	8	4.81603
Trial 1	F1	P	F	0:04:29.458-0:04:29.724	IT1	0.971412	8	3.63914
Trial 1	F1	P	F	0:04:29.724-0:04:29.990	IT1	0.591421	8	2.21561
Trial 1	F1	P	F	0:04:29.990-0:04:30.256	IT1	0.344819	8	1.29178
Trial 1	F1	P	F	0:04:30.256-0:04:30.522	IT1	1.49043	8	5.58355
Trial 1	F1	P	F	0:04:30.522-0:04:30.788	IT1	1.79865	8	6.73816
Trial 1	F1	P	F	0:04:30.788-0:04:31.054	IT1	0.526363	8	1.97188
Trial 1	F1	P	F	0:04:31.054-0:04:31.320	IT1	0.320669	8	1.20131
Trial 1	F1	P	F	0:04:31.320-0:04:31.586	IT1	0.357109	8	1.33782
Trial 1	F1	P	F	0:04:31.586-0:04:31.852	IT1	0.357746	8	1.34022
Trial 1	F1	P	F	0:04:31.852-0:04:32.118	IT1	0.476548	8	1.78527
Trial 1	F1	P	F	0:04:32.118-0:04:32.384	IT1	0.286442	8	1.07308
Trial 1	F1	P	F	0:04:32.384-0:04:32.650	IT1	0.205964	8	0.771594
Trial 1	F1	P	F	0:04:32.650-0:04:32.916	IT1	0.169127	8	0.633592
Trial 1	F1	P	F	0:04:32.916-0:04:33.182	IT1	0.132016	8	0.494566
Trial 1	F1	P	F	0:04:33.182-0:04:33.448	IT1	0.275954	8	1.03379
Trial 1	F1	P	F	0:04:33.448-0:04:33.714	IT1	0.112399	8	0.421075
Trial 1	F1	P	F	0:04:33.714-0:04:33.980	IT1	0.104468	8	0.391364
Trial 1	F1	P	F	0:04:33.980-0:04:34.246	IT1	0.0650321	8	0.243626
Trial 1	F1	P	F	0:04:34.246-0:04:34.512	IT1	0.113577	8	0.425488
Trial 1	F1	P	F	0:04:34.512-0:04:34.778	IT1	0.0842239	8	0.315523
Trial 1	F1	P	F	0:04:34.778-0:04:35.044	IT1	0.0588042	8	0.220295
Trial 1	F1	P	F	0:04:35.044-0:04:35.310	IT1	0.126324	8	0.473244
Trial 1	F1	P	F	0:04:35.310-0:04:35.576	IT1	0.141655	8	0.530677
Trial 1	F1	P	F	0:04:35.576-0:04:35.842	IT1	0.163431	7	0.699722
Trial 1	F1	P	F	0:04:35.842-0:04:36.108	IT1	0.138065	8	0.517227
Trial 1	F1	P	F	0:04:36.108-0:04:36.374	IT1	0.104826	8	0.392703
Trial 1	F1	P	F	0:04:36.374-0:04:36.640	IT1	0.137456	8	0.514942
Trial 1	F1	P	F	0:04:36.640-0:04:36.906	IT1	0.160343	8	0.600683
Trial 1	F1	P	F	0:04:36.906-0:04:37.172	IT1	0.143268	8	0.536718
Trial 1	F1	P	F	0:04:37.172-0:04:37.438	IT1	0.0950324	8	0.356017
Trial 1	F1	P	F	0:04:37.438-0:04:37.704	IT1	0.186699	8	0.69942
Trial 1	F1	P	F	0:04:37.704-0:04:37.970	IT1	0.118615	8	0.444361
Trial 1	F1	P	F	0:04:37.970-0:04:38.236	IT1	0.149089	8	0.558528
Trial 1	F1	P	F	0:04:38.236-0:04:38.502	IT1	0.163297	8	0.611752
Trial 1	F1	P	F	0:04:38.502-0:04:38.768	IT1	0.0776227	8	0.290795
Trial 1	F1	P	F	0:04:38.768-0:04:39.034	IT1	0.123408	8	0.462314
Trial 1	F1	P	F	0:04:39.034-0:04:39.300	IT1	0.0836069	8	0.313212
Trial 1	F1	P	F	0:04:39.300-0:04:39.566	IT1	0.104573	8	0.391758
Trial 1	F1	P	F	0:04:39.566-0:04:39.832	IT1	0.178717	8	0.669518
Trial 1	F1	P	F	0:04:39.832-0:04:40.098	IT1	0.306586	8	1.14855
Trial 1	F1	P	F	0:04:40.098-0:04:40.364	IT1	0.0963151	8	0.360819
Trial 1	F1	P	F	0:04:40.364-0:04:40.630	IT1	0.28148	8	1.05449
Trial 1	F1	P	F	0:04:40.630-0:04:40.896	IT1	0.868969	8	3.25538
Trial 1	F1	P	F	0:04:40.896-0:04:41.162	IT1	0.300357	8	1.12521
Trial 1	F1	P	F	0:04:41.162-0:04:41.428	IT1	0.401436	8	1.50388
Trial 1	F1	P	F	0:04:41.428-0:04:41.694	IT1	0.230476	8	0.863419
Trial 1	F1	P	F	0:04:41.694-0:04:41.960	IT1	0.23504	8	0.880512
Trial 1	F1	P	F	0:04:41.960-0:04:42.226	IT1	0.182988	8	0.685521
Trial 1	F1	P	F	0:04:42.226-0:04:42.492	IT1	0.124162	8	0.465139
Trial 1	F1	P	F	0:04:42.492-0:04:42.758	IT1	0.194476	8	0.728559
Trial 1	F1	P	F	0:04:42.758-0:04:43.024	IT1	0.146299	8	0.548072
Trial 1	F1	P	F	0:04:43.024-0:04:43.290	IT1	0.123726	8	0.463508
Trial 1	F1	P	F	0:04:43.290-0:04:43.556	IT1	0.164226	8	0.615234
Trial 1	F1	P	F	0:04:43.556-0:04:43.822	IT1	0.0836967	8	0.313547
Trial 1	F1	P	F	0:04:43.822-0:04:44.088	IT1	0.0897516	8	0.336235
Trial 1	F1	P	F	0:04:44.088-0:04:44.354	IT1	0.107686	8	0.403418
Trial 1	F1	P	F	0:04:44.354-0:04:44.620	IT1	0.0643907	8	0.241224
Trial 1	F1	P	F	0:04:44.620-0:04:44.886	IT1	0.097091	8	0.363726
Trial 1	F1	P	F	0:04:44.886-0:04:45.152	IT1	0.0968632	8	0.362873
Trial 1	F1	P	F	0:04:45.152-0:04:45.418	IT1	0.0719637	7	0.308107
Trial 1	F1	P	F	0:04:45.418-0:04:45.684	IT1	0.0387284	8	0.145088
Trial 1	F1	P	F	0:04:45.684-0:04:45.950	IT1	0.0639568	8	0.239597
Trial 1	F1	P	F	0:04:45.950-0:04:46.216	IT1	0.0657565	8	0.24634
Trial 1	F1	P	F	0:04:46.216-0:04:46.482	IT1	0.0493882	8	0.18502
Trial 1	F1	P	F	0:04:46.482-0:04:46.748	IT1	0.18486	8	0.692529
Trial 1	F1	P	F	0:04:46.748-0:04:47.014	IT1	0.246691	8	0.924169
Trial 1	F1	P	F	0:04:47.014-0:04:47.280	IT1	0.258484	8	0.968346
Trial 1	F1	P	F	0:04:47.280-0:04:47.546	IT1	0.342643	8	1.28363
Trial 1	F1	P	F	0:04:47.546-0:04:47.812	IT1	0.241751	8	0.905653
Trial 1	F1	P	F	0:04:47.812-0:04:48.078	IT1	0.305324	8	1.14382
Trial 1	F1	P	F	0:04:48.078-0:04:48.344	IT1	0.587826	8	2.20214
Trial 1	F1	P	F	0:04:48.344-0:04:48.610	IT1	0.510233	8	1.91146
Trial 1	F1	P	F	0:04:48.610-0:04:48.876	IT1	0.621687	8	2.329
Trial 1	F1	P	F	0:04:48.876-0:04:49.142	IT1	1.23618	8	4.63102
Trial 1	F1	P	F	0:04:49.142-0:04:49.408	IT1	0.698842	8	2.61803
Trial 1	F1	P	F	0:04:49.408-0:04:49.674	IT1	0.846515	8	3.17126
Trial 1	F1	P	F	0:04:49.674-0:04:49.940	IT1	0.774071	8	2.89985
Trial 1	F1	P	F	0:04:49.940-0:04:50.206	IT1	1.25501	8	4.70158
Trial 1	F1	P	F	0:04:50.206-0:04:50.472	IT1	0.455677	8	1.70707
Trial 1	F1	P	F	0:04:50.472-0:04:50.738	IT1	0.456652	8	1.71073
Trial 1	F1	P	F	0:04:50.738-0:04:51.004	IT1	1.74452	8	6.53543
Trial 1	F1	P	F	0:04:51.004-0:04:51.270	IT1	0.554812	8	2.07845
Trial 1	F1	P	F	0:04:51.270-0:04:51.536	IT1	0.429243	8	1.60806
Trial 1	F1	P	F	0:04:51.536-0:04:51.802	IT1	0.820093	8	3.07227
Trial 1	F1	P	F	0:04:51.802-0:04:52.068	IT1	0.333461	8	1.24922
Trial 1	F1	P	F	0:04:52.068-0:04:52.334	IT1	0.27945	8	1.04689
Trial 1	F1	P	F	0:04:52.334-0:04:52.600	IT1	0.285575	8	1.06984
Trial 1	F1	P	F	0:04:52.600-0:04:52.866	IT1	0.2168	8	0.812191
Trial 1	F1	P	F	0:04:52.866-0:04:53.132	IT1	0.356963	8	1.33727
Trial 1	F1	P	F	0:04:53.132-0:04:53.398	IT1	0.42466	8	1.59088
Trial 1	F1	P	F	0:04:53.398-0:04:53.664	IT1	1.27926	8	4.79244
Trial 1	F1	P	F	0:04:53.664-0:04:53.930	IT1	5.00989	8	18.7683
Trial 1	F1	P	F	0:04:53.930-0:04:54.196	IT1	1.43431	8	5.37327
Trial 1	F1	P	F	0:04:54.196-0:04:54.462	IT1	0.95519	8	3.57838
Trial 1	F1	P	F	0:04:54.462-0:04:54.728	IT1	1.0533	7	4.50964
Trial 1	F1	P	F	0:04:54.728-0:04:54.994	IT1	2.51382	8	9.41738
Trial 1	F1	P	F	0:04:54.994-0:04:55.260	IT1	0.821874	8	3.07895
Trial 1	F1	P	F	0:04:55.260-0:04:55.526	IT1	1.52219	8	5.70248
Trial 1	F1	P	F	0:04:55.526-0:04:55.792	IT1	1.29286	8	4.84339
Trial 1	F1	P	F	0:04:55.792-0:04:56.058	IT1	2.75932	8	10.3371
Trial 1	F1	P	F	0:04:56.058-0:04:56.324	IT1	2.42205	8	9.07359
Trial 1	F1	P	F	0:04:56.324-0:04:56.590	IT1	2.45788	8	9.20785
Trial 1	F1	P	F	0:04:56.590-0:04:56.856	IT1	1.96061	8	7.34493
Trial 1	F1	P	F	0:04:56.856-0:04:57.122	IT1	3.25318	8	12.1872
Trial 1	F1	P	F	0:04:57.122-0:04:57.388	IT1	3.08674	8	11.5637
Trial 1	F1	P	F	0:04:57.388-0:04:57.654	IT1	1.1615	8	4.35128
Trial 1	F1	P	F	0:04:57.654-0:04:57.920	IT1	0.567339	8	2.1254
Trial 1	F1	P	F	0:04:57.920-0:04:58.186	IT1	0.860139	8	3.22229
Trial 1	F1	P	F	0:04:58.186-0:04:58.452	IT1	2.21858	8	8.31133
Trial 1	F1	P	F	0:04:58.452-0:04:58.718	IT1	0.895454	8	3.35459
Trial 1	F1	P	F	0:04:58.718-0:04:58.984	IT1	1.52597	8	5.71669
Trial 1	F1	P	F	0:04:58.984-0:04:59.250	IT1	0.584406	8	2.18934
Trial 1	F1	P	F	0:04:59.250-0:04:59.516	IT1	0.83618	8	3.13254
Trial 1	F1	P	F	0:04:59.516-0:04:59.782	IT1	1.13197	8	4.24067
Trial 1	F1	P	F	0:04:59.782-0:05:00.048	IT1	0.675154	8	2.52929
Trial 1	F1	P	F	0:05:00.048-0:05:00.314	IT1	1.09274	8	4.09369
Trial 1	F1	P	F	0:05:00.314-0:05:00.580	IT1	0.396047	8	1.48369
Trial 1	F1	P	F	0:05:00.580-0:05:00.846	IT1	0.451293	8	1.69065
Trial 1	F1	P	F	0:05:00.846-0:05:01.112	IT1	0.497975	8	1.86556
Trial 1	F1	P	F	0:05:01.112-0:05:01.378	IT1	0.416526	8	1.56041
Trial 1	F1	P	F	0:05:01.378-0:05:01.644	IT1	0.774562	8	2.90169
Trial 1	F1	P	F	0:05:01.644-0:05:01.910	IT1	2.09625	8	7.85307
Trial 1	F1	P	F	0:05:01.910-0:05:02.176	IT1	0.784294	8	2.93816
Trial 1	F1	P	F	0:05:02.176-0:05:02.442	IT1	0.467808	8	1.75253
Trial 1	F1	P	F	0:05:02.442-0:05:02.708	IT1	0.43449	8	1.62771
Trial 1	F1	P	F	0:05:02.708-0:05:02.974	IT1	0.652809	8	2.44558
Trial 1	F1	P	F	0:05:02.974-0:05:03.240	IT1	1.15388	8	4.32276
Trial 1	F1	P	F	0:05:03.240-0:05:03.506	IT1	0.506346	8	1.8969
Trial 1	F1	P	F	0:05:03.506-0:05:03.772	IT1	0.449847	8	1.68524
Trial 1	F1	P	F	0:05:03.772-0:05:04.038	IT1	0.431118	8	1.61507
Trial 1	F1	P	F	0:05:04.038-0:05:04.304	IT1	1.40744	7	6.02587
Trial 1	F1	P	F	0:05:04.304-0:05:04.570	IT1	1.12327	8	4.20807
Trial 1	F1	P	F	0:05:04.570-0:05:04.836	IT1	3.69365	8	13.8373
Trial 1	F1	P	F	0:05:04.836-0:05:05.102	IT1	4.26948	8	15.9945
Trial 1	F1	P	F	0:05:05.102-0:05:05.368	IT1	2.14932	8	8.05191
Trial 1	F1	P	F	0:05:05.368-0:05:05.634	IT1	2.44747	8	9.16879
Trial 1	F1	P	F	0:05:05.634-0:05:05.900	IT1	1.45686	8	5.4578
Trial 1	F1	P	F	0:05:05.900-0:05:06.166	IT1	0.809814	8	3.03375
Trial 1	F1	P	F	0:05:06.166-0:05:06.432	IT1	0.595432	8	2.23064
Trial 1	F1	P	F	0:05:06.432-0:05:06.698	IT1	0.967723	8	3.62532
Trial 1	F1	P	F	0:05:06.698-0:05:06.964	IT1	0.868722	8	3.25445
Trial 1	F1	P	F	0:05:06.964-0:05:07.230	IT1	0.782963	8	2.93319
Trial 1	F1	P	F	0:05:07.230-0:05:07.496	IT1	0.357249	8	1.33834
Trial 1	F1	P	F	0:05:07.496-0:05:07.762	IT1	0.188058	8	0.704511
Trial 1	F1	P	F	0:05:07.762-0:05:08.028	IT1	0.0501011	8	0.187691
Trial 1	F1	P	F	0:05:08.028-0:05:08.294	IT1	0.14596	8	0.546801
Trial 1	F1	P	F	0:05:08.294-0:05:08.560	IT1	0.0712892	8	0.267069
Trial 1	F1	P	F	0:05:08.560-0:05:08.826	IT1	0.131252	8	0.491699
Trial 1	F1	P	F	0:05:08.826-0:05:09.092	IT1	0.0894365	8	0.335051
Trial 1	F1	P	F	0:05:09.092-0:05:09.358	IT1	0.129882	8	0.486571
Trial 1	F1	P	F	0:05:09.358-0:05:09.624	IT1	0.102129	8	0.382601
Trial 1	F1	P	F	0:05:09.624-0:05:09.890	IT1	0.048783	8	0.182755
Trial 1	F1	P	F	0:05:09.890-0:05:10.156	IT1	0.269858	8	1.01096
Trial 1	F1	P	F	0:05:10.156-0:05:10.422	IT1	0.170302	8	0.637995
Trial 1	F1	P	F	0:05:10.422-0:05:10.688	IT1	0.0962704	8	0.360653
Trial 1	F1	P	F	0:05:10.688-0:05:10.954	IT1	0.0942708	8	0.353161
Trial 1	F1	P	F	0:05:10.954-0:05:11.220	IT1	0.126054	8	0.472234
Trial 1	F1	P	F	0:05:11.220-0:05:11.486	IT1	0.246882	8	0.924883
Trial 1	F1	P	F	0:05:11.486-0:05:11.752	IT1	0.225559	8	0.845001
Trial 1	F1	P	F	0:05:11.752-0:05:12.018	IT1	0.284444	8	1.06561
Trial 1	F1	P	F	0:05:12.018-0:05:12.284	IT1	0.189883	8	0.711348
Trial 1	F1	P	F	0:05:12.284-0:05:12.550	IT1	0.537373	8	2.01313
Trial 1	F1	P	F	0:05:12.550-0:05:12.816	IT1	0.351726	8	1.31765
Trial 1	F1	P	F	0:05:12.816-0:05:13.082	IT1	0.519305	8	1.94544
Trial 1	F1	P	F	0:05:13.082-0:05:13.348	IT1	0.8505	8	3.18619
Trial 1	F1	P	F	0:05:13.348-0:05:13.614	IT1	0.594898	8	2.22863
Trial 1	F1	P	F	0:05:13.614-0:05:13.880	IT1	0.368014	7	1.57562
Trial 1	F1	P	F	0:05:13.880-0:05:14.146	IT1	0.335171	8	1.25564
Trial 1	F1	P	F	0:05:14.146-0:05:14.412	IT1	0.503875	8	1.88763
Trial 1	F1	P	F	0:05:14.412-0:05:14.678	IT1	0.600169	8	2.24837
Trial 1	F1	P	F	0:05:14.678-0:05:14.944	IT1	0.619123	8	2.3194
Trial 1	F1	P	F	0:05:14.944-0:05:15.210	IT1	2.13302	8	7.99079
Trial 1	F1	P	F	0:05:15.210-0:05:15.476	IT1	0.460783	8	1.72621
Trial 1	F1	P	F	0:05:15.476-0:05:15.742	IT1	0.228579	8	0.856316
Trial 1	F1	P	F	0:05:15.742-0:05:16.008	IT1	0.192931	8	0.722763
Trial 1	F1	P	F	0:05:16.008-0:05:16.274	IT1	0.659032	8	2.4689
Trial 1	F1	P	F	0:05:16.274-0:05:16.540	IT1	1.90981	8	7.1546
Trial 1	F1	P	F	0:05:16.540-0:05:16.806	IT1	1.69054	8	6.33322
Trial 1	F1	P	F	0:05:16.806-0:05:17.072	IT1	2.32357	8	8.70468
Trial 1	F1	P	F	0:05:17.072-0:05:17.338	IT1	1.63369	8	6.12022
Trial 1	F1	P	F	0:05:17.338-0:05:17.604	IT1	0.623039	8	2.33406
Trial 1	F1	P	F	0:05:17.604-0:05:17.870	IT1	0.272081	8	1.01928
Trial 1	F1	P	F	0:05:17.870-0:05:18.136	IT1	0.226102	8	0.847037
Trial 1	F1	P	F	0:05:18.136-0:05:18.402	IT1	0.645075	8	2.41661
Trial 1	F1	P	F	0:05:18.402-0:05:18.668	IT1	1.36699	8	5.12106
Trial 1	F1	P	F	0:05:18.668-0:05:18.934	IT1	2.05819	8	7.71049
Trial 1	F1	P	F	0:05:18.934-0:05:19.200	IT1	1.99287	8	7.46578
Trial 1	F1	P	F	0:05:19.200-0:05:19.466	IT1	1.46616	8	5.4926
Trial 1	F1	P	F	0:05:19.466-0:05:19.732	IT1	1.18479	8	4.43851
Trial 1	F1	P	F	0:05:19.732-0:05:19.998	IT1	0.557265	8	2.08766
Trial 1	F1	P	F	0:05:19.998-0:05:20.264	IT1	1.23326	8	4.6201
Trial 1	F1	P	F	0:05:20.264-0:05:20.530	IT1	1.452	8	5.43955
Trial 1	F1	P	F	0:05:20.530-0:05:20.796	IT1	1.06812	8	4.00147
Trial 1	F1	P	F	0:05:20.796-0:05:21.062	IT1	0.292767	8	1.09677
Trial 1	F1	P	F	0:05:21.062-0:05:21.328	IT1	0.926649	8	3.47146
Trial 1	F1	P	F	0:05:21.328-0:05:21.594	IT1	1.17643	8	4.40722
Trial 1	F1	P	F	0:05:21.594-0:05:21.860	IT1	0.919316	8	3.44398
Trial 1	F1	P	F	0:05:21.860-0:05:22.126	IT1	3.85795	8	14.4529
Trial 1	F1	P	F	0:05:22.126-0:05:22.392	IT1	5.2746	8	19.7599
Trial 1	F1	P	F	0:05:22.392-0:05:22.658	IT1	4.22302	8	15.8205
Trial 1	F1	P	F	0:05:22.658-0:05:22.924	IT1	1.56628	8	5.86768
Trial 1	F1	P	F	0:05:22.924-0:05:23.190	IT1	0.451188	8	1.69026
Trial 1	F1	P	F	0:05:23.190-0:05:23.456	IT1	0.203038	7	0.86929
Trial 1	F1	P	F	0:05:23.456-0:05:23.722	IT1	0.282211	8	1.05724
Trial 1	F1	P	F	0:05:23.722-0:05:23.988	IT1	0.916141	8	3.43209
Trial 1	F1	P	F	0:05:23.988-0:05:24.254	IT1	0.852346	8	3.19311
Trial 1	F1	P	F	0:05:24.254-0:05:24.520	IT1	1.15424	8	4.32407
Trial 1	F1	P	F	0:05:24.520-0:05:24.786	IT1	0.761349	8	2.85219
Trial 1	F1	P	F	0:05:24.786-0:05:25.052	IT1	0.517316	8	1.938
Trial 1	F1	P	F	0:05:25.052-0:05:25.318	IT1	0.292738	8	1.09667
Trial 1	F1	P	F	0:05:25.318-0:05:25.584	IT1	2.24135	8	8.39668
Trial 1	F1	P	F	0:05:25.584-0:05:25.850	IT1	1.95337	8	7.31778
Trial 1	F1	P	F	0:05:25.850-0:05:26.116	IT1	0.789154	8	2.95636
Trial 1	F1	P	F	0:05:26.116-0:05:26.382	IT1	0.560102	8	2.09828
Trial 1	F1	P	F	0:05:26.382-0:05:26.648	IT1	0.656565	8	2.45965
Trial 1	F1	P	F	0:05:26.648-0:05:26.914	IT1	1.01172	8	3.79018
Trial 1	F1	P	F	0:05:26.914-0:05:27.180	IT1	0.563785	8	2.11209
Trial 1	F1	P	F	0:05:27.180-0:05:27.446	IT1	0.281781	8	1.05562
Trial 1	F1	P	F	0:05:27.446-0:05:27.712	IT1	0.344869	8	1.29198
Trial 1	F1	P	F	0:05:27.712-0:05:27.978	IT1	0.156343	8	0.585699
Trial 1	F1	P	F	0:05:27.978-0:05:28.244	IT1	0.621289	8	2.32751
Trial 1	F1	P	F	0:05:28.244-0:05:28.510	IT1	1.00727	8	3.77352
Trial 1	F1	P	F	0:05:28.510-0:05:28.776	IT1	0.700688	8	2.62496
Trial 1	F1	P	F	0:05:28.776-0:05:29.042	IT1	0.473487	8	1.77381
Trial 1	F1	P	F	0:05:29.042-0:05:29.308	IT1	1.44679	8	5.42006
Trial 1	F1	P	F	0:05:29.308-0:05:29.574	IT1	1.26456	8	4.73736
Trial 1	F1	P	F	0:05:29.574-0:05:29.840	IT1	1.18385	8	4.43498
Trial 1	F1	P	F	0:05:29.840-0:05:30.106	IT1	1.49439	8	5.59835
Trial 1	F1	P	F	0:05:30.106-0:05:30.372	IT1	1.11601	8	4.18085
Trial 1	F1	P	F	0:05:30.372-0:05:30.638	IT1	0.727581	8	2.7257
Trial 1	F1	P	F	0:05:30.638-0:05:30.904	IT1	0.590928	8	2.21377
Trial 1	F1	P	F	0:05:30.904-0:05:31.170	IT1	0.601692	8	2.25407
Trial 1	F1	P	F	0:05:31.170-0:05:31.436	IT1	0.356818	8	1.33673
Trial 1	F1	P	F	0:05:31.436-0:05:31.702	IT1	0.235769	8	0.883252
Trial 1	F1	P	F	0:05:31.702-0:05:31.968	IT1	0.663992	8	2.48748
Trial 1	F1	P	F	0:05:31.968-0:05:32.234	IT1	0.665646	8	2.49368
Trial 1	F1	P	F	0:05:32.234-0:05:32.500	IT1	1.0176	8	3.81216
Trial 1	F1	P	F	0:05:32.500-0:05:32.766	IT1	1.31686	7	5.63801
Trial 1	F1	P	F	0:05:32.766-0:05:33.032	IT1	2.00121	8	7.49704
Trial 1	F1	P	F	0:05:33.032-0:05:33.298	IT1	1.20095	8	4.49906
Trial 1	F1	P	F	0:05:33.298-0:05:33.564	IT1	1.20396	8	4.51034
Trial 1	F1	P	F	0:05:33.564-0:05:33.830	IT1	2.96491	8	11.1073
Trial 1	F1	P	F	0:05:33.830-0:05:34.096	IT1	0.42522	8	1.59298
Trial 1	F1	P	F	0:05:34.096-0:05:34.362	IT1	0.666164	8	2.49561
Trial 1	F1	P	F	0:05:34.362-0:05:34.628	IT1	0.871698	8	3.2656
Trial 1	F1	P	F	0:05:34.628-0:05:34.894	IT1	0.315226	8	1.18091
Trial 1	F1	P	F	0:05:34.894-0:05:35.160	IT1	0.202239	8	0.757642
Trial 1	F1	P	F	0:05:35.160-0:05:35.426	IT1	0.30206	8	1.1316
Trial 1	F1	P	F	0:05:35.426-0:05:35.692	IT1	0.257353	8	0.964106
Trial 1	F1	P	F	0:05:35.692-0:05:35.958	IT1	0.298742	8	1.11916
Trial 1	F1	P	F	0:05:35.958-0:05:36.224	IT1	0.450075	8	1.68609
Trial 1	F1	P	F	0:05:36.224-0:05:36.490	IT1	0.515805	8	1.93234
Trial 1	F1	P	F	0:05:36.490-0:05:36.756	IT1	0.95284	8	3.56957
Trial 1	F1	P	F	0:05:36.756-0:05:37.022	IT1	0.505818	8	1.89491
Trial 1	F1	P	F	0:05:37.022-0:05:37.288	IT1	1.31009	8	4.90793
Trial 1	F1	P	F	0:05:37.288-0:05:37.554	IT1	1.25762	8	4.71134
Trial 1	F1	P	F	0:05:37.554-0:05:37.820	IT1	0.589575	8	2.2087
Trial 1	F1	P	F	0:05:37.820-0:05:38.086	IT1	0.673664	8	2.52371
Trial 1	F1	P	F	0:05:38.086-0:05:38.352	IT1	0.893355	8	3.34676
Trial 1	F1	P	F	0:05:38.352-0:05:38.618	IT1	2.1091	8	7.90125
Trial 1	F1	P	F	0:05:38.618-0:05:38.884	IT1	1.34046	8	5.02167
Trial 1	F1	P	F	0:05:38.884-0:05:39.150	IT1	2.325	8	8.7101
Trial 1	F1	P	F	0:05:39.150-0:05:39.416	IT1	3.64322	8	13.6484
Trial 1	F1	P	F	0:05:39.416-0:05:39.682	IT1	1.55754	8	5.83493
Trial 1	F1	P	F	0:05:39.682-0:05:39.948	IT1	0.590697	8	2.21291
Trial 1	F1	P	F	0:05:39.948-0:05:40.214	IT1	0.380732	8	1.42631
Trial 1	F1	P	F	0:05:40.214-0:05:40.480	IT1	0.155634	8	0.583046
Trial 1	F1	P	F	0:05:40.480-0:05:40.746	IT1	0.117569	8	0.44044
Trial 1	F1	P	F	0:05:40.746-0:05:41.012	IT1	0.0815315	8	0.305437
Trial 1	F1	P	F	0:05:41.012-0:05:41.278	IT1	0.152573	8	0.571578
Trial 1	F1	P	F	0:05:41.278-0:05:41.544	IT1	0.0422731	8	0.158365
Trial 1	F1	P	F	0:05:41.544-0:05:41.810	IT1	0.133092	8	0.498598
Trial 1	F1	P	F	0:05:41.810-0:05:42.076	IT1	0.081042	8	0.303603
Trial 1	F1	P	F	0:05:42.076-0:05:42.342	IT1	0.0479949	7	0.205486
Trial 1	F1	P	F	0:05:42.342-0:05:42.608	IT1	0.0948569	8	0.355357
Trial 1	F1	P	F	0:05:42.608-0:05:42.874	IT1	0.0820719	8	0.307461
Trial 1	F1	P	F	0:05:42.874-0:05:43.140	IT1	0.162172	8	0.607534
Trial 1	F1	P	F	0:05:43.140-0:05:43.406	IT1	0.0727407	8	0.272506
Trial 1	F1	P	F	0:05:43.406-0:05:43.672	IT1	0.0983381	8	0.368398
Trial 1	F1	P	F	0:05:43.672-0:05:43.938	IT1	0.0372846	8	0.139678
Trial 1	F1	P	F	0:05:43.938-0:05:44.204	IT1	0.253228	8	0.948662
Trial 1	F1	P	F	0:05:44.204-0:05:44.470	IT1	0.254439	8	0.953189
Trial 1	F1	P	F	0:05:44.470-0:05:44.736	IT1	0.101848	8	0.38155
Trial 1	F1	P	F	0:05:44.736-0:05:45.002	IT1	0.254734	8	0.954294
Trial 1	F1	P	F	0:05:45.002-0:05:45.268	IT1	0.142968	8	0.535598
Trial 1	F1	P	F	0:05:45.268-0:05:45.534	IT1	0.100304	8	0.375766
Trial 1	F1	P	F	0:05:45.534-0:05:45.800	IT1	0.0640088	8	0.239792
Trial 1	F1	P	F	0:05:45.800-0:05:46.066	IT1	0.0700908	8	0.262577
Trial 1	F1	P	F	0:05:46.066-0:05:46.332	IT1	0.0294239	8	0.110229
Trial 1	F1	P	F	0:05:46.332-0:05:46.598	IT1	0.0181606	8	0.0680342
Trial 1	F1	P	F	0:05:46.598-0:05:46.864	IT1	0.103751	8	0.388679
Trial 1	F1	P	F	0:05:46.864-0:05:47.130	IT1	0.222011	8	0.831709
Trial 1	F1	P	F	0:05:47.130-0:05:47.396	IT1	0.110939	8	0.415607
Trial 1	F1	P	F	0:05:47.396-0:05:47.662	IT1	0.0471317	8	0.176567
Trial 1	F1	P	F	0:05:47.662-0:05:47.928	IT1	0.0740337	8	0.27735
Trial 1	F1	P	F	0:05:47.928-0:05:48.194	IT1	0.0286532	8	0.107343
Trial 1	F1	P	F	0:05:48.194-0:05:48.460	IT1	0.0230747	8	0.086443
Trial 1	F1	P	F	0:05:48.460-0:05:48.726	IT1	0.0381413	8	0.142888
Trial 1	F1	P	F	0:05:48.726-0:05:48.992	IT1	0.0467202	8	0.175024
Trial 1	F1	P	F	0:05:48.992-0:05:49.258	IT1	0.0866896	8	0.324761
Trial 1	F1	P	F	0:05:49.258-0:05:49.524	IT1	0.0241228	8	0.0903698
Trial 1	F1	P	F	0:05:49.524-0:05:49.790	IT1	0.105151	8	0.39392
Trial 1	F1	P	F	0:05:49.790-0:05:50.056	IT1	0.0485227	8	0.181778
Trial 1	F1	P	F	0:05:50.056-0:05:50.322	IT1	0.0687457	8	0.257538
Trial 1	F1	P	F	0:05:50.322-0:05:50.588	IT1	0.0623719	8	0.23366
Trial 1	F1	P	F	0:05:50.588-0:05:50.854	IT1	0.0593286	8	0.222259
Trial 1	F1	P	F	0:05:50.854-0:05:51.120	IT1	0.113977	8	0.426984
Trial 1	F1	P	F	0:05:51.120-0:05:51.386	IT1	0.117398	8	0.439803
Trial 1	F1	P	F	0:05:51.386-0:05:51.652	IT1	0.162005	8	0.606909
Trial 1	F1	P	F	0:05:51.652-0:05:51.918	IT1	0.115223	7	0.493317
Trial 1	F1	P	F	0:05:51.918-0:05:52.184	IT1	0.187381	8	0.701977
Trial 1	F1	P	F	0:05:52.184-0:05:52.450	IT1	0.119164	8	0.446418
Trial 1	F1	P	F	0:05:52.450-0:05:52.716	IT1	0.124684	8	0.467096
Trial 1	F1	P	F	0:05:52.716-0:05:52.982	IT1	0.0538839	8	0.201863
Trial 1	F1	P	F	0:05:52.982-0:05:53.248	IT1	0.0782054	8	0.292978
Trial 1	F1	P	F	0:05:53.248-0:05:53.514	IT1	0.124437	8	0.466172
Trial 1	F1	P	F	0:05:53.514-0:05:53.780	IT1	0.0766921	8	0.287306
Trial 1	F1	P	F	0:05:53.780-0:05:54.046	IT1	0.120937	8	0.453062
Trial 1	F1	P	F	0:05:54.046-0:05:54.312	IT1	0.114676	8	0.429605
Trial 1	F1	P	F	0:05:54.312-0:05:54.578	IT1	0.0464909	8	0.174166
Trial 1	F1	P	F	0:05:54.578-0:05:54.844	IT1	0.0186995	8	0.0700542
Trial 1	F1	P	F	0:05:54.844-0:05:55.110	IT1	0.102907	8	0.385515
Trial 1	F1	P	F	0:05:55.110-0:05:55.376	IT1	0.0795978	8	0.298193
Trial 1	F1	P	F	0:05:55.376-0:05:55.642	IT1	0.0678773	8	0.254286
Trial 1	F1	P	F	0:05:55.642-0:05:55.908	IT1	0.0419328	8	0.157091
Trial 1	F1	P	F	0:05:55.908-0:05:56.174	IT1	0.0702256	8	0.263087
Trial 1	F1	P	F	0:05:56.174-0:05:56.440	IT1	0.117055	8	0.438517
Trial 1	F1	P	F	0:05:56.440-0:05:56.706	IT1	0.0496439	8	0.185977
Trial 1	F1	P	F	0:05:56.706-0:05:56.972	IT1	0.0980488	8	0.367316
Trial 1	F1	P	F	0:05:56.972-0:05:57.238	IT1	0.0215538	8	0.0807459
Trial 1	F1	P	F	0:05:57.238-0:05:57.504	IT1	0.126785	8	0.474968
Trial 1	F1	P	F	0:05:57.504-0:05:57.770	IT1	0.0397641	8	0.148967
Trial 1	F1	P	F	0:05:57.770-0:05:58.036	IT1	0.0934447	8	0.350066
Trial 1	F1	P	F	0:05:58.036-0:05:58.302	IT1	0.155983	8	0.58435
Trial 1	F1	P	F	0:05:58.302-0:05:58.568	IT1	0.163299	8	0.611757
Trial 1	F1	P	F	0:05:58.568-0:05:58.834	IT1	0.129053	8	0.483464
Trial 1	F1	P	F	0:05:58.834-0:05:59.100	IT1	0.130636	8	0.489391
Trial 1	F1	P	F	0:05:59.100-0:05:59.366	IT1	0.14241	8	0.533503
Trial 1	F1	P	F	0:05:59.366-0:05:59.632	IT1	0.0511601	8	0.191658
Trial 1	F1	P	F	0:05:59.632-0:05:59.898	IT1	0.105417	8	0.39492
Trial 1	F1	P	F	0:05:59.898-0:06:00.164	CS2a	0.108751	8	0.407411
Trial 1	F1	P	F	0:06:00.164-0:06:00.430	CS2a	0.173875	8	0.651378
Trial 1	F1	P	F	0:06:00.430-0:06:00.696	CS2a	0.206037	8	0.771869
Trial 1	F1	P	F	0:06:00.696-0:06:00.962	CS2a	0.1255	8	0.470157
Trial 1	F1	P	F	0:06:00.962-0:06:01.228	CS2a	0.0815807	8	0.30562
Trial 1	F1	P	F	0:06:01.228-0:06:01.494	CS2a	0.0625957	7	0.267998
Trial 1	F1	P	F	0:06:01.494-0:06:01.760	CS2a	0.0918615	8	0.344135
Trial 1	F1	P	F	0:06:01.760-0:06:02.026	CS2a	1.13897	8	4.26683
Trial 1	F1	P	F	0:06:02.026-0:06:02.292	CS2a	11.1079	8	41.613
Trial 1	F1	P	F	0:06:02.292-0:06:02.558	CS2a	11.5777	8	43.3727
Trial 1	F1	P	F	0:06:02.558-0:06:02.824	CS2a	3.538	8	13.2542
Trial 1	F1	P	F	0:06:02.824-0:06:03.090	CS2a	0.596589	8	2.23497
Trial 1	F1	P	F	0:06:03.090-0:06:03.356	CS2a	0.344506	8	1.2906
Trial 1	F1	P	F	0:06:03.356-0:06:03.622	CS2a	0.189976	8	0.711697
Trial 1	F1	P	F	0:06:03.622-0:06:03.888	CS2a	0.0255713	8	0.0957958
Trial 1	F1	P	F	0:06:03.888-0:06:04.154	CS2a	0.192728	8	0.722004
Trial 1	F1	P	F	0:06:04.154-0:06:04.420	CS2a	0.158568	8	0.594037
Trial 1	F1	P	F	0:06:04.420-0:06:04.686	CS2a	0.350566	8	1.3133
Trial 1	F1	P	F	0:06:04.686-0:06:04.952	CS2a	0.428514	8	1.60532
Trial 1	F1	P	F	0:06:04.952-0:06:05.218	CS2a	0.190534	8	0.713787
Trial 1	F1	P	F	0:06:05.218-0:06:05.484	CS2a	0.100975	8	0.378278
Trial 1	F1	P	F	0:06:05.484-0:06:05.750	CS2a	0.0642457	8	0.240683
Trial 1	F1	P	F	0:06:05.750-0:06:06.016	CS2a	0.0748655	8	0.280464
Trial 1	F1	P	F	0:06:06.016-0:06:06.282	CS2a	0.0250354	8	0.093789
Trial 1	F1	P	F	0:06:06.282-0:06:06.548	CS2a	0.0350022	8	0.131127
Trial 1	F1	P	F	0:06:06.548-0:06:06.814	CS2a	1.65712	8	6.20801
Trial 1	F1	P	F	0:06:06.814-0:06:07.080	CS2a	2.0346	8	7.6221
Trial 1	F1	P	F	0:06:07.080-0:06:07.346	CS2a	0.448737	8	1.68108
Trial 1	F1	P	F	0:06:07.346-0:06:07.612	CS2a	0.36773	8	1.37761
Trial 1	F1	P	F	0:06:07.612-0:06:07.878	CS2a	0.608839	8	2.28085
Trial 1	F1	P	F	0:06:07.878-0:06:08.144	CS2a	0.538623	8	2.0178
Trial 1	F1	P	F	0:06:08.144-0:06:08.410	CS2a	0.35157	8	1.31706
Trial 1	F1	P	F	0:06:08.410-0:06:08.676	CS2a	0.108647	8	0.407019
Trial 1	F1	P	F	0:06:08.676-0:06:08.942	CS2a	0.160108	8	0.599808
Trial 1	F1	P	F	0:06:08.942-0:06:09.208	CS2a	0.341146	8	1.27801
Trial 1	F1	P	F	0:06:09.208-0:06:09.474	CS2a	0.404759	8	1.51632
Trial 1	F1	P	F	0:06:09.474-0:06:09.740	CS2a	0.0951502	8	0.356459
Trial 1	F1	P	F	0:06:09.740-0:06:10.006	CS2a	0.216051	8	0.809377
Trial 1	F1	P	F	0:06:10.006-0:06:10.272	POST	0.107251	8	0.40179
Trial 1	F1	P	F	0:06:10.272-0:06:10.538	POST	0.105282	8	0.394413
Trial 1	F1	P	F	0:06:10.538-0:06:10.804	POST	0.134857	7	0.577386
Trial 1	F1	P	F	0:06:10.804-0:06:11.070	POST	0.144794	8	0.542435
Trial 1	F1	P	F	0:06:11.070-0:06:11.336	POST	0.231419	8	0.866962
Trial 1	F1	P	F	0:06:11.336-0:06:11.602	POST	0.0598148	8	0.224082
Trial 1	F1	P	F	0:06:11.602-0:06:11.868	POST	0.0946377	8	0.354536
Trial 1	F1	P	F	0:06:11.868-0:06:12.134	POST	0.0618478	8	0.231697
Trial 1	F1	P	F	0:06:12.134-0:06:12.400	POST	0.0432877	8	0.162166
Trial 1	F1	P	F	0:06:12.400-0:06:12.666	POST	0.202065	8	0.756984
Trial 1	F1	P	F	0:06:12.666-0:06:12.932	POST	0.0798958	8	0.299309
Trial 1	F1	P	F	0:06:12.932-0:06:13.198	POST	0.153188	8	0.573878
Trial 1	F1	P	F	0:06:13.198-0:06:13.464	POST	0.0303643	8	0.113752
Trial 1	F1	P	F	0:06:13.464-0:06:13.730	POST	0.0851386	8	0.31895
Trial 1	F1	P	F	0:06:13.730-0:06:13.996	POST	0.0329814	8	0.123557
Trial 1	F1	P	F	0:06:13.996-0:06:14.262	POST	0.144156	8	0.540045
Trial 1	F1	P	F	0:06:14.262-0:06:14.528	POST	0.109214	8	0.409144
Trial 1	F1	P	F	0:06:14.528-0:06:14.794	POST	0.0960377	8	0.35978
Trial 1	F1	P	F	0:06:14.794-0:06:15.060	POST	0.167018	8	0.62569
Trial 1	F1	P	F	0:06:15.060-0:06:15.326	POST	0.0583653	8	0.218652
Trial 1	F1	P	F	0:06:15.326-0:06:15.592	POST	0.193576	8	0.725184
Trial 1	F1	P	F	0:06:15.592-0:06:15.858	POST	0.0589587	8	0.220874
Trial 1	F1	P	F	0:06:15.858-0:06:16.124	POST	0.230403	8	0.863144
Trial 1	F1	P	F	0:06:16.124-0:06:16.390	POST	0.0939862	8	0.352098
Trial 1	F1	P	F	0:06:16.390-0:06:16.656	POST	0.299037	8	1.12026
Trial 1	F1	P	F	0:06:16.656-0:06:16.922	POST	0.099215	8	0.371683
Trial 1	F1	P	F	0:06:16.922-0:06:17.188	POST	0.105131	8	0.393847
Trial 1	F1	P	F	0:06:17.188-0:06:17.454	POST	0.135215	8	0.50655
Trial 1	F1	P	F	0:06:17.454-0:06:17.720	POST	0.0988173	8	0.370194
Trial 1	F1	P	F	0:06:17.720-0:06:17.986	POST	0.102081	8	0.382419
Trial 1	F1	P	F	0:06:17.986-0:06:18.252	POST	0.100955	8	0.378203
Trial 1	F1	P	F	0:06:18.252-0:06:18.518	POST	0.267038	8	1.00039
Trial 1	F1	P	F	0:06:18.518-0:06:18.784	POST	0.107081	8	0.40115
Trial 1	F1	P	F	0:06:18.784-0:06:19.050	POST	0.254901	8	0.954917
Trial 1	F1	P	F	0:06:19.050-0:06:19.316	POST	0.109336	8	0.409603
Trial 1	F1	P	F	0:06:19.316-0:06:19.582	POST	0.153288	8	0.574257
Trial 1	F1	P	F	0:06:19.582-0:06:19.848	POST	0.152126	8	0.569902
Trial 1	F1	P	F	0:06:19.848-0:06:20.114	POST	0.0421043	8	0.157732
Trial 1	F1	P	F	0:06:20.114-0:06:20.380	POST	0.257187	7	1.10113
Trial 1	F1	P	F	0:06:20.380-0:06:20.646	POST	0.152727	8	0.572152
Trial 1	F1	P	F	0:06:20.646-0:06:20.912	POST	0.241454	8	0.904544
Trial 1	F1	P	F	0:06:20.912-0:06:21.178	POST	0.0923823	8	0.346085
Trial 1	F1	P	F	0:06:21.178-0:06:21.444	POST	0.253113	8	0.948227
Trial 1	F1	P	F	0:06:21.444-0:06:21.710	POST	0.103762	8	0.388718
Trial 1	F1	P	F	0:06:21.710-0:06:21.976	POST	0.0605648	8	0.226891
Trial 1	F1	P	F	0:06:21.976-0:06:22.242	POST	0.269711	8	1.0104
Trial 1	F1	P	F	0:06:22.242-0:06:22.508	POST	0.0466473	8	0.174753
Trial 1	F1	P	F	0:06:22.508-0:06:22.774	POST	0.224803	8	0.842168
Trial 1	F1	P	F	0:06:22.774-0:06:23.040	POST	0.234041	8	0.876776
Trial 1	F1	P	F	0:06:23.040-0:06:23.306	POST	0.240982	8	0.902784
Trial 1	F1	P	F	0:06:23.306-0:06:23.572	POST	0.102293	8	0.383216
Trial 1	F1	P	F	0:06:23.572-0:06:23.838	POST	0.167538	8	0.627633
Trial 1	F1	P	F	0:06:23.838-0:06:24.104	POST	0.213292	8	0.799047
Trial 1	F1	P	F	0:06:24.104-0:06:24.370	POST	0.0922441	8	0.345569
Trial 1	F1	P	F	0:06:24.370-0:06:24.636	POST	0.145114	8	0.54363
Trial 1	F1	P	F	0:06:24.636-0:06:24.902	POST	0.205068	8	0.768236
Trial 1	F1	P	F	0:06:24.902-0:06:25.168	POST	0.260275	8	0.975049
Trial 1	F1	P	F	0:06:25.168-0:06:25.434	POST	0.192408	8	0.720809
Trial 1	F1	P	F	0:06:25.434-0:06:25.700	POST	0.220385	8	0.825621
Trial 1	F1	P	F	0:06:25.700-0:06:25.966	POST	0.0719495	8	0.269542
Trial 1	F1	P	F	0:06:25.966-0:06:26.232	POST	0.156609	8	0.586705
Trial 1	F1	P	F	0:06:26.232-0:06:26.498	POST	0.162593	8	0.609114
Trial 1	F1	P	F	0:06:26.498-0:06:26.764	POST	0.0177343	8	0.0664373
Trial 1	F1	P	F	0:06:26.764-0:06:27.030	POST	0.18089	8	0.677667
Trial 1	F1	P	F	0:06:27.030-0:06:27.296	POST	0.0715714	8	0.268124
Trial 1	F1	P	F	0:06:27.296-0:06:27.562	POST	0.22564	8	0.8453
Trial 1	F1	P	F	0:06:27.562-0:06:27.828	POST	0.0823598	8	0.30854
Trial 1	F1	P	F	0:06:27.828-0:06:28.094	POST	0.135224	8	0.506584
Trial 1	F1	P	F	0:06:28.094-0:06:28.360	POST	0.0561277	8	0.210268
Trial 1	F1	P	F	0:06:28.360-0:06:28.626	POST	0.118122	8	0.442517
Trial 1	F1	P	F	0:06:28.626-0:06:28.892	POST	0.0576291	8	0.215892
Trial 1	F1	P	F	0:06:28.892-0:06:29.158	POST	0.0330458	8	0.123799
Trial 1	F1	P	F	0:06:29.158-0:06:29.424	POST	0.0877843	8	0.328865
Trial 1	F1	P	F	0:06:29.424-0:06:29.690	POST	0.0468298	8	0.175435
Trial 1	F1	P	F	0:06:29.690-0:06:29.956	POST	0.0575238	7	0.246285
Trial 1	F1	P	F	0:06:29.956-0:06:30.222	POST	0.0557431	8	0.208829
Trial 1	F1	P	F	0:06:30.222-0:06:30.488	POST	0.0379206	8	0.14206
Trial 1	F1	P	F	0:06:30.488-0:06:30.754	POST	0.094731	8	0.354885
Trial 1	F1	P	F	0:06:30.754-0:06:31.020	POST	0.0725554	8	0.271812
Trial 1	F1	P	F	0:06:31.020-0:06:31.286	POST	0.0738483	8	0.276653
Trial 1	F1	P	F	0:06:31.286-0:06:31.552	POST	0.0329675	8	0.123505
Trial 1	F1	P	F	0:06:31.552-0:06:31.818	POST	0.191955	8	0.719114
Trial 1	F1	P	F	0:06:31.818-0:06:32.084	POST	0.162797	8	0.609875
Trial 1	F1	P	F	0:06:32.084-0:06:32.350	POST	0.127619	8	0.478093
Trial 1	F1	P	F	0:06:32.350-0:06:32.616	POST	0.104002	8	0.389617
Trial 1	F1	P	F	0:06:32.616-0:06:32.882	POST	0.147222	8	0.551533
Trial 1	F1	P	F	0:06:32.882-0:06:33.148	POST	0.213633	8	0.800319
Trial 1	F1	P	F	0:06:33.148-0:06:33.414	POST	0.107398	8	0.402339
Trial 1	F1	P	F	0:06:33.414-0:06:33.680	POST	0.0493841	8	0.185005
Trial 1	F1	P	F	0:06:33.680-0:06:33.946	POST	0.0404091	8	0.151383
Trial 1	F1	P	F	0:06:33.946-0:06:34.212	POST	0.238575	8	0.893756
Trial 1	F1	P	F	0:06:34.212-0:06:34.478	POST	0.0426452	8	0.15976
Trial 1	F1	P	F	0:06:34.478-0:06:34.744	POST	0.22097	8	0.827804
Trial 1	F1	P	F	0:06:34.744-0:06:35.010	POST	0.0545667	8	0.204422
Trial 1	F1	P	F	0:06:35.010-0:06:35.276	POST	0.14934	8	0.559467
Trial 1	F1	P	F	0:06:35.276-0:06:35.542	POST	0.126675	8	0.474557
Trial 1	F1	P	F	0:06:35.542-0:06:35.808	POST	0.0918636	8	0.344143
Trial 1	F1	P	F	0:06:35.808-0:06:36.074	POST	0.167049	8	0.625803
Trial 1	F1	P	F	0:06:36.074-0:06:36.340	POST	0.055896	8	0.209401
Trial 1	F1	P	F	0:06:36.340-0:06:36.606	POST	0.248699	8	0.931686
Trial 1	F1	P	F	0:06:36.606-0:06:36.872	POST	0.092277	8	0.345694
Trial 1	F1	P	F	0:06:36.872-0:06:37.138	POST	0.20096	8	0.752842
Trial 1	F1	P	F	0:06:37.138-0:06:37.404	POST	0.0602427	8	0.225683
Trial 1	F1	P	F	0:06:37.404-0:06:37.670	POST	0.0844214	8	0.316264
Trial 1	F1	P	F	0:06:37.670-0:06:37.936	POST	0.0942258	8	0.352993
Trial 1	F1	P	F	0:06:37.936-0:06:38.202	POST	0.0723235	8	0.270944
Trial 1	F1	P	F	0:06:38.202-0:06:38.468	POST	0.0653139	8	0.244683
Trial 1	F1	P	F	0:06:38.468-0:06:38.734	POST	0.0398704	8	0.149365
Trial 1	F1	P	F	0:06:38.734-0:06:39.000	POST	0.269251	8	1.00868
Trial 1	F1	P	F	0:06:39.000-0:06:39.266	POST	0.055963	8	0.209651
Trial 1	F1	P	F	0:06:39.266-0:06:39.532	POST	0.227595	7	0.974428
Trial 1	F1	P	F	0:06:39.532-0:06:39.798	POST	0.14408	8	0.539758
Trial 1	F1	P	F	0:06:39.798-0:06:40.064	POST	0.173556	8	0.650182
Trial 1	F1	P	F	0:06:40.064-0:06:40.330	POST	0.0587766	8	0.220193
Trial 1	F1	P	F	0:06:40.330-0:06:40.596	POST	0.0411811	8	0.154275
Trial 1	F1	P	F	0:06:40.596-0:06:40.862	POST	0.251383	8	0.94174
Trial 1	F1	P	F	0:06:40.862-0:06:41.128	POST	0.0986961	8	0.369742
Trial 1	F1	P	F	0:06:41.128-0:06:41.394	POST	0.293195	8	1.09839
Trial 1	F1	P	F	0:06:41.394-0:06:41.660	POST	0.0618938	8	0.23187
Trial 1	F1	P	F	0:06:41.660-0:06:41.926	POST	0.259088	8	0.970606
Trial 1	F1	P	F	0:06:41.926-0:06:42.192	POST	0.14264	8	0.534364
Trial 1	F1	P	F	0:06:42.192-0:06:42.458	POST	0.145944	8	0.546742
Trial 1	F1	P	F	0:06:42.458-0:06:42.724	POST	0.196533	8	0.73626
Trial 1	F1	P	F	0:06:42.724-0:06:42.990	POST	0.106508	8	0.399007
Trial 1	F1	P	F	0:06:42.990-0:06:43.256	POST	0.255599	8	0.95754
Trial 1	F1	P	F	0:06:43.256-0:06:43.522	POST	0.177892	8	0.666426
Trial 1	F1	P	F	0:06:43.522-0:06:43.788	POST	0.159778	8	0.598567
Trial 1	F1	P	F	0:06:43.788-0:06:44.054	POST	0.0567359	8	0.212547
Trial 1	F1	P	F	0:06:44.054-0:06:44.320	POST	0.154557	8	0.579012
Trial 1	F1	P	F	0:06:44.320-0:06:44.586	POST	0.117487	8	0.440142
Trial 1	F1	P	F	0:06:44.586-0:06:44.852	POST	0.0775294	8	0.290443
Trial 1	F1	P	F	0:06:44.852-0:06:45.118	POST	0.066182	8	0.247933
Trial 1	F1	P	F	0:06:45.118-0:06:45.384	POST	0.0488455	8	0.182987
Trial 1	F1	P	F	0:06:45.384-0:06:45.650	POST	0.131836	8	0.49389
Trial 1	F1	P	F	0:06:45.650-0:06:45.916	POST	0.0525475	8	0.196855
Trial 1	F1	P	F	0:06:45.916-0:06:46.182	POST	0.195179	8	0.731189
Trial 1	F1	P	F	0:06:46.182-0:06:46.448	POST	0.226188	8	0.847355
Trial 1	F1	P	F	0:06:46.448-0:06:46.714	POST	0.189834	8	0.711162
Trial 1	F1	P	F	0:06:46.714-0:06:46.980	POST	0.155569	8	0.5828
Trial 1	F1	P	F	0:06:46.980-0:06:47.246	POST	0.0904457	8	0.338832
Trial 1	F1	P	F	0:06:47.246-0:06:47.512	POST	0.057796	8	0.216518
Trial 1	F1	P	F	0:06:47.512-0:06:47.778	POST	0.0607463	8	0.227571
Trial 1	F1	P	F	0:06:47.778-0:06:48.044	POST	0.0748026	8	0.280227
Trial 1	F1	P	F	0:06:48.044-0:06:48.310	POST	0.115483	8	0.43263
Trial 1	F1	P	F	0:06:48.310-0:06:48.576	POST	0.0866467	8	0.324599
Trial 1	F1	P	F	0:06:48.576-0:06:48.842	POST	0.129634	7	0.555022
Trial 1	F1	P	F	0:06:48.842-0:06:49.108	POST	0.124331	8	0.465772
Trial 1	F1	P	F	0:06:49.108-0:06:49.374	POST	0.0965878	8	0.361841
Trial 1	F1	P	F	0:06:49.374-0:06:49.640	POST	0.110873	8	0.415359
Trial 1	F1	P	F	0:06:49.640-0:06:49.906	POST	0.0610946	8	0.228877
Trial 1	F1	P	F	0:06:49.906-0:06:50.172	POST	0.0278508	8	0.104336
Trial 1	F1	P	F	0:06:50.172-0:06:50.438	POST	0.138297	8	0.518099
Trial 1	F1	P	F	0:06:50.438-0:06:50.704	POST	0.0807467	8	0.302497
Trial 1	F1	P	F	0:06:50.704-0:06:50.970	POST	0.0866571	8	0.324639
Trial 1	F1	P	F	0:06:50.970-0:06:51.236	POST	0.0476604	8	0.178549
Trial 1	F1	P	F	0:06:51.236-0:06:51.502	POST	0.104697	8	0.392222
Trial 1	F1	P	F	0:06:51.502-0:06:51.768	POST	0.0654229	8	0.245091
Trial 1	F1	P	F	0:06:51.768-0:06:52.034	POST	0.0908754	8	0.34044
Trial 1	F1	P	F	0:06:52.034-0:06:52.300	POST	0.118034	8	0.442188
Trial 1	F1	P	F	0:06:52.300-0:06:52.566	POST	0.0271089	8	0.101557
Trial 1	F1	P	F	0:06:52.566-0:06:52.832	POST	0.125506	8	0.470177
Trial 1	F1	P	F	0:06:52.832-0:06:53.098	POST	0.0985939	8	0.369357
Trial 1	F1	P	F	0:06:53.098-0:06:53.364	POST	0.171088	8	0.640941
Trial 1	F1	P	F	0:06:53.364-0:06:53.630	POST	0.0498711	8	0.186829
Trial 1	F1	P	F	0:06:53.630-0:06:53.896	POST	0.285416	8	1.06923
Trial 1	F1	P	F	0:06:53.896-0:06:54.162	POST	0.396034	8	1.48363
Trial 1	F1	P	F	0:06:54.162-0:06:54.428	POST	0.44291	8	1.65925
Trial 1	F1	P	F	0:06:54.428-0:06:54.694	POST	0.361808	8	1.35543
Trial 1	F1	P	F	0:06:54.694-0:06:54.960	POST	0.174017	8	0.651912
Trial 1	F1	P	F	0:06:54.960-0:06:55.226	POST	0.29106	8	1.09038
Trial 1	F1	P	F	0:06:55.226-0:06:55.492	POST	0.258933	8	0.970028
Trial 1	F1	P	F	0:06:55.492-0:06:55.758	POST	0.345714	8	1.29513
Trial 1	F1	P	F	0:06:55.758-0:06:56.024	POST	0.30129	8	1.12871
Trial 1	F1	P	F	0:06:56.024-0:06:56.290	POST	0.217293	8	0.814039
Trial 1	F1	P	F	0:06:56.290-0:06:56.556	POST	0.257967	8	0.966413
Trial 1	F1	P	F	0:06:56.556-0:06:56.822	POST	0.149043	8	0.558347
Trial 1	F1	P	F	0:06:56.822-0:06:57.088	POST	0.14767	8	0.553207
Trial 1	F1	P	F	0:06:57.088-0:06:57.354	POST	0.0396315	8	0.148469
Trial 1	F1	P	F	0:06:57.354-0:06:57.620	POST	0.101678	8	0.380911
Trial 1	F1	P	F	0:06:57.620-0:06:57.886	POST	0.0461254	8	0.172798
Trial 1	F1	P	F	0:06:57.886-0:06:58.152	POST	0.100811	8	0.377662
Trial 1	F1	P	F	0:06:58.152-0:06:58.418	POST	0.0224535	7	0.0961325
Trial 1	F1	P	F	0:06:58.418-0:06:58.684	POST	0.0699632	8	0.262099
Trial 1	F1	P	F	0:06:58.684-0:06:58.950	POST	0.0735608	8	0.275576
Trial 1	F1	P	F	0:06:58.950-0:06:59.216	POST	0.0778972	8	0.291823
Trial 1	F1	P	F	0:06:59.216-0:06:59.482	POST	0.140129	8	0.524957
Trial 1	F1	P	F	0:06:59.482-0:06:59.748	POST	0.0434766	8	0.162874
Trial 1	F1	P	F	0:06:59.748-0:07:00.014	POST	0.129379	8	0.484684
Trial 1	F1	P	F	0:07:00.014-0:07:00.280	POST	0.0516336	8	0.193432
Trial 1	F1	P	F	0:07:00.280-0:07:00.546	POST	0.0945553	8	0.354225
Trial 1	F1	P	F	0:07:00.546-0:07:00.812	POST	0.0576289	8	0.215892
Trial 1	F1	P	F	0:07:00.812-0:07:01.078	POST	0.0409761	8	0.153506
Trial 1	F1	P	F	0:07:01.078-0:07:01.344	POST	0.0994993	8	0.372749
Trial 1	F1	P	F	0:07:01.344-0:07:01.610	POST	0.0269109	8	0.100814
Trial 1	F1	P	F	0:07:01.610-0:07:01.876	POST	0.0948321	8	0.355263
Trial 1	F1	P	F	0:07:01.876-0:07:02.142	POST	0.0418039	8	0.156608
Trial 1	F1	P	F	0:07:02.142-0:07:02.408	POST	0.0914629	8	0.342643
Trial 1	F1	P	F	0:07:02.408-0:07:02.674	POST	0.201556	8	0.755076
Trial 1	F1	P	F	0:07:02.674-0:07:02.940	POST	0.0891963	8	0.334151
Trial 1	F1	P	F	0:07:02.940-0:07:03.206	POST	0.0993019	8	0.372008
Trial 1	F1	P	F	0:07:03.206-0:07:03.472	POST	0.0905938	8	0.339388
Trial 1	F1	P	F	0:07:03.472-0:07:03.738	POST	0.114399	8	0.428567
Trial 1	F1	P	F	0:07:03.738-0:07:04.004	POST	0.0199559	8	0.0747604
Trial 1	F1	P	F	0:07:04.004-0:07:04.270	POST	0.111154	8	0.416412
Trial 1	F1	P	F	0:07:04.270-0:07:04.536	POST	0.0984772	8	0.368919
Trial 1	F1	P	F	0:07:04.536-0:07:04.802	POST	0.0896017	8	0.335669
Trial 1	F1	P	F	0:07:04.802-0:07:05.068	POST	0.0529114	8	0.198218
Trial 1	F1	P	F	0:07:05.068-0:07:05.334	POST	0.0926214	8	0.346984
Trial 1	F1	P	F	0:07:05.334-0:07:05.600	POST	0.0698978	8	0.261856
Trial 1	F1	P	F	0:07:05.600-0:07:05.866	POST	0.0541006	8	0.202674
Trial 1	F1	P	F	0:07:05.866-0:07:06.132	POST	0.0392684	8	0.14711
Trial 1	F1	P	F	0:07:06.132-0:07:06.398	POST	0.0234953	8	0.0880192
Trial 1	F1	P	F	0:07:06.398-0:07:06.664	POST	0.145669	8	0.545711
Trial 1	F1	P	F	0:07:06.664-0:07:06.930	POST	0.064058	8	0.239978
Trial 1	F1	P	F	0:07:06.930-0:07:07.196	POST	0.076969	8	0.288344
Trial 1	F1	P	F	0:07:07.196-0:07:07.462	POST	0.020623	8	0.0772595
Trial 1	F1	P	F	0:07:07.462-0:07:07.728	POST	0.0764167	8	0.286275
Trial 1	F1	P	F	0:07:07.728-0:07:07.994	POST	0.0393008	7	0.168264
Trial 1	F1	P	F	0:07:07.994-0:07:08.260	POST	0.0513457	8	0.192355
Trial 1	F1	P	F	0:07:08.260-0:07:08.526	POST	0.0842408	8	0.315588
Trial 1	F1	P	F	0:07:08.526-0:07:08.792	POST	0.011366	8	0.0425795
Trial 1	F1	P	F	0:07:08.792-0:07:09.058	POST	0.0257865	5	0.154565
Trial 2	F6	P	F	Start-0:00:00.266	BL	1.7108	7	7.32479
Trial 2	F6	P	F	0:00:00.266-0:00:00.532	BL	0.17285	8	0.647534
Trial 2	F6	P	F	0:00:00.532-0:00:00.798	BL	0.0890886	8	0.333748
Trial 2	F6	P	F	0:00:00.798-0:00:01.064	BL	0.0402736	8	0.150875
Trial 2	F6	P	F	0:00:01.064-0:00:01.330	BL	0.0225667	8	0.0845398
Trial 2	F6	P	F	0:00:01.330-0:00:01.596	BL	0.0152908	8	0.057283
Trial 2	F6	P	F	0:00:01.596-0:00:01.862	BL	0.0529815	8	0.198483
Trial 2	F6	P	F	0:00:01.862-0:00:02.128	BL	0.0249667	8	0.0935312
Trial 2	F6	P	F	0:00:02.128-0:00:02.394	BL	0.014078	8	0.0527399
Trial 2	F6	P	F	0:00:02.394-0:00:02.660	BL	0.0222862	8	0.0834897
Trial 2	F6	P	F	0:00:02.660-0:00:02.926	BL	0.00781057	8	0.0292603
Trial 2	F6	P	F	0:00:02.926-0:00:03.192	BL	0.0190013	8	0.0711835
Trial 2	F6	P	F	0:00:03.192-0:00:03.458	BL	0.011107	8	0.0416092
Trial 2	F6	P	F	0:00:03.458-0:00:03.724	BL	0.0358502	8	0.134304
Trial 2	F6	P	F	0:00:03.724-0:00:03.990	BL	0.022914	8	0.0858415
Trial 2	F6	P	F	0:00:03.990-0:00:04.256	BL	0.0224822	8	0.0842249
Trial 2	F6	P	F	0:00:04.256-0:00:04.522	BL	0.0250223	8	0.0937392
Trial 2	F6	P	F	0:00:04.522-0:00:04.788	BL	0.0289556	8	0.108475
Trial 2	F6	P	F	0:00:04.788-0:00:05.054	BL	0.0212224	8	0.0795048
Trial 2	F6	P	F	0:00:05.054-0:00:05.320	BL	0.00638354	8	0.0239144
Trial 2	F6	P	F	0:00:05.320-0:00:05.586	BL	0.0142771	8	0.0534856
Trial 2	F6	P	F	0:00:05.586-0:00:05.852	BL	0.0466554	8	0.174782
Trial 2	F6	P	F	0:00:05.852-0:00:06.118	BL	0.0400843	8	0.150166
Trial 2	F6	P	F	0:00:06.118-0:00:06.384	BL	0.0425033	8	0.159228
Trial 2	F6	P	F	0:00:06.384-0:00:06.650	BL	0.0381469	8	0.142907
Trial 2	F6	P	F	0:00:06.650-0:00:06.916	BL	0.0346296	8	0.129731
Trial 2	F6	P	F	0:00:06.916-0:00:07.182	BL	0.0173031	8	0.0648219
Trial 2	F6	P	F	0:00:07.182-0:00:07.448	BL	0.0544823	8	0.204103
Trial 2	F6	P	F	0:00:07.448-0:00:07.714	BL	0.0297424	8	0.111423
Trial 2	F6	P	F	0:00:07.714-0:00:07.980	BL	0.0433768	8	0.162501
Trial 2	F6	P	F	0:00:07.980-0:00:08.246	BL	0.0546252	8	0.20464
Trial 2	F6	P	F	0:00:08.246-0:00:08.512	BL	0.083163	8	0.311547
Trial 2	F6	P	F	0:00:08.512-0:00:08.778	BL	0.0552443	8	0.206958
Trial 2	F6	P	F	0:00:08.778-0:00:09.044	BL	0.0795281	8	0.297931
Trial 2	F6	P	F	0:00:09.044-0:00:09.310	BL	0.0883605	8	0.331019
Trial 2	F6	P	F	0:00:09.310-0:00:09.576	BL	0.0216397	7	0.0926487
Trial 2	F6	P	F	0:00:09.576-0:00:09.842	BL	0.0803725	8	0.301096
Trial 2	F6	P	F	0:00:09.842-0:00:10.108	BL	0.065786	8	0.24645
Trial 2	F6	P	F	0:00:10.108-0:00:10.374	BL	0.083512	8	0.312855
Trial 2	F6	P	F	0:00:10.374-0:00:10.640	BL	0.0586488	8	0.219715
Trial 2	F6	P	F	0:00:10.640-0:00:10.906	BL	0.0421374	8	0.157858
Trial 2	F6	P	F	0:00:10.906-0:00:11.172	BL	0.0247449	8	0.0927008
Trial 2	F6	P	F	0:00:11.172-0:00:11.438	BL	0.0226554	8	0.084873
Trial 2	F6	P	F	0:00:11.438-0:00:11.704	BL	0.0221862	8	0.0831147
Trial 2	F6	P	F	0:00:11.704-0:00:11.970	BL	0.0226504	8	0.0848541
Trial 2	F6	P	F	0:00:11.970-0:00:12.236	BL	0.0252649	8	0.0946482
Trial 2	F6	P	F	0:00:12.236-0:00:12.502	BL	0.013026	8	0.0487989
Trial 2	F6	P	F	0:00:12.502-0:00:12.768	BL	0.020761	8	0.0777755
Trial 2	F6	P	F	0:00:12.768-0:00:13.034	BL	0.0151009	8	0.0565714
Trial 2	F6	P	F	0:00:13.034-0:00:13.300	BL	0.036702	8	0.137495
Trial 2	F6	P	F	0:00:13.300-0:00:13.566	BL	0.0295667	8	0.110764
Trial 2	F6	P	F	0:00:13.566-0:00:13.832	BL	0.0178411	8	0.0668372
Trial 2	F6	P	F	0:00:13.832-0:00:14.098	BL	0.0221722	8	0.0830626
Trial 2	F6	P	F	0:00:14.098-0:00:14.364	BL	0.0149436	8	0.055982
Trial 2	F6	P	F	0:00:14.364-0:00:14.630	BL	0.0208317	8	0.0780406
Trial 2	F6	P	F	0:00:14.630-0:00:14.896	BL	0.0193407	8	0.0724549
Trial 2	F6	P	F	0:00:14.896-0:00:15.162	BL	0.030978	8	0.116051
Trial 2	F6	P	F	0:00:15.162-0:00:15.428	BL	0.0103816	8	0.0388921
Trial 2	F6	P	F	0:00:15.428-0:00:15.694	BL	0.0321326	8	0.120376
Trial 2	F6	P	F	0:00:15.694-0:00:15.960	BL	0.0328317	8	0.122996
Trial 2	F6	P	F	0:00:15.960-0:00:16.226	BL	0.0935446	8	0.35044
Trial 2	F6	P	F	0:00:16.226-0:00:16.492	BL	0.0456648	8	0.171071
Trial 2	F6	P	F	0:00:16.492-0:00:16.758	BL	0.0285574	8	0.106983
Trial 2	F6	P	F	0:00:16.758-0:00:17.024	BL	0.0692178	8	0.259309
Trial 2	F6	P	F	0:00:17.024-0:00:17.290	BL	0.0465346	8	0.174331
Trial 2	F6	P	F	0:00:17.290-0:00:17.556	BL	0.0503197	8	0.18851
Trial 2	F6	P	F	0:00:17.556-0:00:17.822	BL	0.0343835	8	0.12881
Trial 2	F6	P	F	0:00:17.822-0:00:18.088	BL	0.0434329	8	0.16271
Trial 2	F6	P	F	0:00:18.088-0:00:18.354	BL	0.041477	8	0.155383
Trial 2	F6	P	F	0:00:18.354-0:00:18.620	BL	0.0321101	8	0.120292
Trial 2	F6	P	F	0:00:18.620-0:00:18.886	BL	0.0186038	8	0.0696942
Trial 2	F6	P	F	0:00:18.886-0:00:19.152	BL	0.00760717	7	0.0325696
Trial 2	F6	P	F	0:00:19.152-0:00:19.418	BL	0.0500268	8	0.187413
Trial 2	F6	P	F	0:00:19.418-0:00:19.684	BL	0.0204431	8	0.0765847
Trial 2	F6	P	F	0:00:19.684-0:00:19.950	BL	0.0238545	8	0.0893657
Trial 2	F6	P	F	0:00:19.950-0:00:20.216	BL	0.00905738	8	0.0339311
Trial 2	F6	P	F	0:00:20.216-0:00:20.482	BL	0.00372214	8	0.013944
Trial 2	F6	P	F	0:00:20.482-0:00:20.748	BL	0.0078196	8	0.0292941
Trial 2	F6	P	F	0:00:20.748-0:00:21.014	BL	0.00840655	8	0.031493
Trial 2	F6	P	F	0:00:21.014-0:00:21.280	BL	0.0172723	8	0.0647064
Trial 2	F6	P	F	0:00:21.280-0:00:21.546	BL	0.0103166	8	0.0386486
Trial 2	F6	P	F	0:00:21.546-0:00:21.812	BL	0.0330058	8	0.123648
Trial 2	F6	P	F	0:00:21.812-0:00:22.078	BL	0.0257965	8	0.0966403
Trial 2	F6	P	F	0:00:22.078-0:00:22.344	BL	0.0257238	8	0.0963674
Trial 2	F6	P	F	0:00:22.344-0:00:22.610	BL	0.0192511	8	0.0721197
Trial 2	F6	P	F	0:00:22.610-0:00:22.876	BL	0.0197222	8	0.0738851
Trial 2	F6	P	F	0:00:22.876-0:00:23.142	BL	0.0262637	8	0.0983895
Trial 2	F6	P	F	0:00:23.142-0:00:23.408	BL	0.018772	8	0.0703246
Trial 2	F6	P	F	0:00:23.408-0:00:23.674	BL	0.0264707	8	0.0991658
Trial 2	F6	P	F	0:00:23.674-0:00:23.940	BL	0.0202687	8	0.0759317
Trial 2	F6	P	F	0:00:23.940-0:00:24.206	BL	0.0358143	8	0.13417
Trial 2	F6	P	F	0:00:24.206-0:00:24.472	BL	0.0828769	8	0.310478
Trial 2	F6	P	F	0:00:24.472-0:00:24.738	BL	0.104932	8	0.393103
Trial 2	F6	P	F	0:00:24.738-0:00:25.004	BL	0.0400346	8	0.149979
Trial 2	F6	P	F	0:00:25.004-0:00:25.270	BL	0.0734538	8	0.275177
Trial 2	F6	P	F	0:00:25.270-0:00:25.536	BL	0.0423468	8	0.158642
Trial 2	F6	P	F	0:00:25.536-0:00:25.802	BL	0.0101619	8	0.038069
Trial 2	F6	P	F	0:00:25.802-0:00:26.068	BL	0.0608873	8	0.228101
Trial 2	F6	P	F	0:00:26.068-0:00:26.334	BL	0.0327108	8	0.122543
Trial 2	F6	P	F	0:00:26.334-0:00:26.600	BL	0.0720583	8	0.269947
Trial 2	F6	P	F	0:00:26.600-0:00:26.866	BL	0.0167891	8	0.062896
Trial 2	F6	P	F	0:00:26.866-0:00:27.132	BL	0.0501555	8	0.187894
Trial 2	F6	P	F	0:00:27.132-0:00:27.398	BL	0.0295528	8	0.110712
Trial 2	F6	P	F	0:00:27.398-0:00:27.664	BL	0.0459958	8	0.172311
Trial 2	F6	P	F	0:00:27.664-0:00:27.930	BL	0.0554637	8	0.207783
Trial 2	F6	P	F	0:00:27.930-0:00:28.196	BL	0.0725065	8	0.271628
Trial 2	F6	P	F	0:00:28.196-0:00:28.462	BL	0.0703813	8	0.263665
Trial 2	F6	P	F	0:00:28.462-0:00:28.728	BL	0.043912	7	0.188007
Trial 2	F6	P	F	0:00:28.728-0:00:28.994	BL	0.0746254	8	0.279566
Trial 2	F6	P	F	0:00:28.994-0:00:29.260	BL	0.0645247	8	0.241724
Trial 2	F6	P	F	0:00:29.260-0:00:29.526	BL	0.0209752	8	0.0785789
Trial 2	F6	P	F	0:00:29.526-0:00:29.792	BL	0.0216658	8	0.0811651
Trial 2	F6	P	F	0:00:29.792-0:00:30.058	BL	0.0171304	8	0.0641744
Trial 2	F6	P	F	0:00:30.058-0:00:30.324	BL	0.0186163	8	0.0697414
Trial 2	F6	P	F	0:00:30.324-0:00:30.590	BL	0.0130973	8	0.0490656
Trial 2	F6	P	F	0:00:30.590-0:00:30.856	BL	0.0134113	8	0.0502419
Trial 2	F6	P	F	0:00:30.856-0:00:31.122	BL	0.0210685	8	0.0789277
Trial 2	F6	P	F	0:00:31.122-0:00:31.388	BL	0.0242786	8	0.090953
Trial 2	F6	P	F	0:00:31.388-0:00:31.654	BL	0.0135151	8	0.050631
Trial 2	F6	P	F	0:00:31.654-0:00:31.920	BL	0.0316385	8	0.118526
Trial 2	F6	P	F	0:00:31.920-0:00:32.186	BL	0.0247939	8	0.0928848
Trial 2	F6	P	F	0:00:32.186-0:00:32.452	BL	0.0230013	8	0.0861686
Trial 2	F6	P	F	0:00:32.452-0:00:32.718	BL	0.00963804	8	0.0361066
Trial 2	F6	P	F	0:00:32.718-0:00:32.984	BL	0.0122588	8	0.0459246
Trial 2	F6	P	F	0:00:32.984-0:00:33.250	BL	0.0492096	8	0.184351
Trial 2	F6	P	F	0:00:33.250-0:00:33.516	BL	0.0156798	8	0.0587409
Trial 2	F6	P	F	0:00:33.516-0:00:33.782	BL	0.048939	8	0.183337
Trial 2	F6	P	F	0:00:33.782-0:00:34.048	BL	0.0322759	8	0.120913
Trial 2	F6	P	F	0:00:34.048-0:00:34.314	BL	0.0587605	8	0.220131
Trial 2	F6	P	F	0:00:34.314-0:00:34.580	BL	0.0145674	8	0.0545729
Trial 2	F6	P	F	0:00:34.580-0:00:34.846	BL	0.0379861	8	0.142307
Trial 2	F6	P	F	0:00:34.846-0:00:35.112	BL	0.0905644	8	0.339278
Trial 2	F6	P	F	0:00:35.112-0:00:35.378	BL	0.0699402	8	0.262012
Trial 2	F6	P	F	0:00:35.378-0:00:35.644	BL	0.0854973	8	0.320295
Trial 2	F6	P	F	0:00:35.644-0:00:35.910	BL	0.0286176	8	0.107208
Trial 2	F6	P	F	0:00:35.910-0:00:36.176	BL	0.0606868	8	0.227347
Trial 2	F6	P	F	0:00:36.176-0:00:36.442	BL	0.516679	8	1.93561
Trial 2	F6	P	F	0:00:36.442-0:00:36.708	BL	0.176289	8	0.660424
Trial 2	F6	P	F	0:00:36.708-0:00:36.974	BL	0.544876	8	2.04124
Trial 2	F6	P	F	0:00:36.974-0:00:37.240	BL	0.448564	8	1.68043
Trial 2	F6	P	F	0:00:37.240-0:00:37.506	BL	1.7791	8	6.66498
Trial 2	F6	P	F	0:00:37.506-0:00:37.772	BL	6.15643	8	23.0635
Trial 2	F6	P	F	0:00:37.772-0:00:38.038	BL	4.77219	7	20.4318
Trial 2	F6	P	F	0:00:38.038-0:00:38.304	BL	3.00719	8	11.2657
Trial 2	F6	P	F	0:00:38.304-0:00:38.570	BL	1.20857	8	4.52759
Trial 2	F6	P	F	0:00:38.570-0:00:38.836	BL	0.509451	8	1.90854
Trial 2	F6	P	F	0:00:38.836-0:00:39.102	BL	0.399428	8	1.49636
Trial 2	F6	P	F	0:00:39.102-0:00:39.368	BL	0.565019	8	2.11671
Trial 2	F6	P	F	0:00:39.368-0:00:39.634	BL	0.301726	8	1.13035
Trial 2	F6	P	F	0:00:39.634-0:00:39.900	BL	0.491372	8	1.84079
Trial 2	F6	P	F	0:00:39.900-0:00:40.166	BL	1.42705	8	5.34607
Trial 2	F6	P	F	0:00:40.166-0:00:40.432	BL	1.03494	8	3.87715
Trial 2	F6	P	F	0:00:40.432-0:00:40.698	BL	1.19493	8	4.4765
Trial 2	F6	P	F	0:00:40.698-0:00:40.964	BL	2.41065	8	9.03097
Trial 2	F6	P	F	0:00:40.964-0:00:41.230	BL	2.31229	8	8.66239
Trial 2	F6	P	F	0:00:41.230-0:00:41.496	BL	1.79557	8	6.72666
Trial 2	F6	P	F	0:00:41.496-0:00:41.762	BL	0.644777	8	2.4155
Trial 2	F6	P	F	0:00:41.762-0:00:42.028	BL	0.178064	8	0.667071
Trial 2	F6	P	F	0:00:42.028-0:00:42.294	BL	0.216596	8	0.811428
Trial 2	F6	P	F	0:00:42.294-0:00:42.560	BL	0.112767	8	0.422454
Trial 2	F6	P	F	0:00:42.560-0:00:42.826	BL	0.0775365	8	0.29047
Trial 2	F6	P	F	0:00:42.826-0:00:43.092	BL	0.10754	8	0.40287
Trial 2	F6	P	F	0:00:43.092-0:00:43.358	BL	0.127034	8	0.4759
Trial 2	F6	P	F	0:00:43.358-0:00:43.624	BL	0.07107	8	0.266246
Trial 2	F6	P	F	0:00:43.624-0:00:43.890	BL	0.080112	8	0.300122
Trial 2	F6	P	F	0:00:43.890-0:00:44.156	BL	0.0620656	8	0.232513
Trial 2	F6	P	F	0:00:44.156-0:00:44.422	BL	0.0535563	8	0.200635
Trial 2	F6	P	F	0:00:44.422-0:00:44.688	BL	0.0871856	8	0.326617
Trial 2	F6	P	F	0:00:44.688-0:00:44.954	BL	0.0595125	8	0.22295
Trial 2	F6	P	F	0:00:44.954-0:00:45.220	BL	0.0590803	8	0.22133
Trial 2	F6	P	F	0:00:45.220-0:00:45.486	BL	0.0812856	8	0.304516
Trial 2	F6	P	F	0:00:45.486-0:00:45.752	BL	0.0733603	8	0.274825
Trial 2	F6	P	F	0:00:45.752-0:00:46.018	BL	0.048136	8	0.180329
Trial 2	F6	P	F	0:00:46.018-0:00:46.284	BL	0.0738139	8	0.276526
Trial 2	F6	P	F	0:00:46.284-0:00:46.550	BL	0.117864	8	0.441548
Trial 2	F6	P	F	0:00:46.550-0:00:46.816	BL	0.0699476	8	0.262041
Trial 2	F6	P	F	0:00:46.816-0:00:47.082	BL	0.0589502	8	0.220844
Trial 2	F6	P	F	0:00:47.082-0:00:47.348	BL	0.0385306	8	0.144345
Trial 2	F6	P	F	0:00:47.348-0:00:47.614	BL	0.0630474	7	0.269933
Trial 2	F6	P	F	0:00:47.614-0:00:47.880	BL	0.0415915	8	0.155813
Trial 2	F6	P	F	0:00:47.880-0:00:48.146	BL	0.0472274	8	0.176925
Trial 2	F6	P	F	0:00:48.146-0:00:48.412	BL	0.0992337	8	0.371754
Trial 2	F6	P	F	0:00:48.412-0:00:48.678	BL	0.111347	8	0.417134
Trial 2	F6	P	F	0:00:48.678-0:00:48.944	BL	0.0614641	8	0.23026
Trial 2	F6	P	F	0:00:48.944-0:00:49.210	BL	0.0763681	8	0.286097
Trial 2	F6	P	F	0:00:49.210-0:00:49.476	BL	0.0646925	8	0.242353
Trial 2	F6	P	F	0:00:49.476-0:00:49.742	BL	0.0808523	8	0.302893
Trial 2	F6	P	F	0:00:49.742-0:00:50.008	BL	0.0672254	8	0.251845
Trial 2	F6	P	F	0:00:50.008-0:00:50.274	BL	0.0635744	8	0.238166
Trial 2	F6	P	F	0:00:50.274-0:00:50.540	BL	0.095867	8	0.359142
Trial 2	F6	P	F	0:00:50.540-0:00:50.806	BL	0.0436638	8	0.163576
Trial 2	F6	P	F	0:00:50.806-0:00:51.072	BL	0.0813979	8	0.304935
Trial 2	F6	P	F	0:00:51.072-0:00:51.338	BL	0.055694	8	0.208644
Trial 2	F6	P	F	0:00:51.338-0:00:51.604	BL	0.0472842	8	0.177138
Trial 2	F6	P	F	0:00:51.604-0:00:51.870	BL	0.0965569	8	0.361726
Trial 2	F6	P	F	0:00:51.870-0:00:52.136	BL	0.0399308	8	0.14959
Trial 2	F6	P	F	0:00:52.136-0:00:52.402	BL	0.064942	8	0.243288
Trial 2	F6	P	F	0:00:52.402-0:00:52.668	BL	0.0351631	8	0.13173
Trial 2	F6	P	F	0:00:52.668-0:00:52.934	BL	0.0603843	8	0.226215
Trial 2	F6	P	F	0:00:52.934-0:00:53.200	BL	0.0757654	8	0.283838
Trial 2	F6	P	F	0:00:53.200-0:00:53.466	BL	0.103285	8	0.386931
Trial 2	F6	P	F	0:00:53.466-0:00:53.732	BL	0.0740605	8	0.277448
Trial 2	F6	P	F	0:00:53.732-0:00:53.998	BL	0.0340622	8	0.127607
Trial 2	F6	P	F	0:00:53.998-0:00:54.264	BL	0.0985401	8	0.369154
Trial 2	F6	P	F	0:00:54.264-0:00:54.530	BL	0.0541465	8	0.202846
Trial 2	F6	P	F	0:00:54.530-0:00:54.796	BL	0.0654023	8	0.245012
Trial 2	F6	P	F	0:00:54.796-0:00:55.062	BL	0.061523	8	0.230481
Trial 2	F6	P	F	0:00:55.062-0:00:55.328	BL	0.0811913	8	0.304162
Trial 2	F6	P	F	0:00:55.328-0:00:55.594	BL	0.0869268	8	0.325648
Trial 2	F6	P	F	0:00:55.594-0:00:55.860	BL	0.0807644	8	0.302567
Trial 2	F6	P	F	0:00:55.860-0:00:56.126	BL	0.11422	8	0.427896
Trial 2	F6	P	F	0:00:56.126-0:00:56.392	BL	0.0480104	8	0.179858
Trial 2	F6	P	F	0:00:56.392-0:00:56.658	BL	0.1201	8	0.449926
Trial 2	F6	P	F	0:00:56.658-0:00:56.924	BL	0.060854	8	0.227975
Trial 2	F6	P	F	0:00:56.924-0:00:57.190	BL	0.0705089	7	0.301878
Trial 2	F6	P	F	0:00:57.190-0:00:57.456	BL	0.0735404	8	0.275499
Trial 2	F6	P	F	0:00:57.456-0:00:57.722	BL	0.0666376	8	0.249641
Trial 2	F6	P	F	0:00:57.722-0:00:57.988	BL	0.0398042	8	0.149117
Trial 2	F6	P	F	0:00:57.988-0:00:58.254	BL	0.0742622	8	0.278203
Trial 2	F6	P	F	0:00:58.254-0:00:58.520	BL	0.0727747	8	0.272631
Trial 2	F6	P	F	0:00:58.520-0:00:58.786	BL	0.0936029	8	0.350659
Trial 2	F6	P	F	0:00:58.786-0:00:59.052	BL	0.110078	8	0.412381
Trial 2	F6	P	F	0:00:59.052-0:00:59.318	BL	0.0984347	8	0.368762
Trial 2	F6	P	F	0:00:59.318-0:00:59.584	BL	0.06556	8	0.245602
Trial 2	F6	P	F	0:00:59.584-0:00:59.850	BL	0.0648508	8	0.242947
Trial 2	F6	P	F	0:00:59.850-0:01:00.116	BL	0.0666267	8	0.2496
Trial 2	F6	P	F	0:01:00.116-0:01:00.382	BL	0.0443161	8	0.166019
Trial 2	F6	P	F	0:01:00.382-0:01:00.648	BL	0.0848828	8	0.317993
Trial 2	F6	P	F	0:01:00.648-0:01:00.914	BL	0.1196	8	0.448049
Trial 2	F6	P	F	0:01:00.914-0:01:01.180	BL	0.0994733	8	0.372651
Trial 2	F6	P	F	0:01:01.180-0:01:01.446	BL	0.109765	8	0.411208
Trial 2	F6	P	F	0:01:01.446-0:01:01.712	BL	0.0532198	8	0.199374
Trial 2	F6	P	F	0:01:01.712-0:01:01.978	BL	0.0903755	8	0.33857
Trial 2	F6	P	F	0:01:01.978-0:01:02.244	BL	0.0536163	8	0.200859
Trial 2	F6	P	F	0:01:02.244-0:01:02.510	BL	0.0889564	8	0.333251
Trial 2	F6	P	F	0:01:02.510-0:01:02.776	BL	0.0526413	8	0.197209
Trial 2	F6	P	F	0:01:02.776-0:01:03.042	BL	0.0483833	8	0.181255
Trial 2	F6	P	F	0:01:03.042-0:01:03.308	BL	0.0875867	8	0.328122
Trial 2	F6	P	F	0:01:03.308-0:01:03.574	BL	0.0343233	8	0.128583
Trial 2	F6	P	F	0:01:03.574-0:01:03.840	BL	0.0822367	8	0.308079
Trial 2	F6	P	F	0:01:03.840-0:01:04.106	BL	0.120334	8	0.450801
Trial 2	F6	P	F	0:01:04.106-0:01:04.372	BL	0.115943	8	0.43435
Trial 2	F6	P	F	0:01:04.372-0:01:04.638	BL	0.108003	8	0.404611
Trial 2	F6	P	F	0:01:04.638-0:01:04.904	BL	0.103459	8	0.387581
Trial 2	F6	P	F	0:01:04.904-0:01:05.170	BL	0.0820822	8	0.3075
Trial 2	F6	P	F	0:01:05.170-0:01:05.436	BL	0.0904488	8	0.338844
Trial 2	F6	P	F	0:01:05.436-0:01:05.702	BL	0.113892	8	0.426668
Trial 2	F6	P	F	0:01:05.702-0:01:05.968	BL	0.0631865	8	0.236713
Trial 2	F6	P	F	0:01:05.968-0:01:06.234	BL	0.113367	8	0.424699
Trial 2	F6	P	F	0:01:06.234-0:01:06.500	BL	0.0726781	8	0.27227
Trial 2	F6	P	F	0:01:06.500-0:01:06.766	BL	0.0706309	7	0.3024
Trial 2	F6	P	F	0:01:06.766-0:01:07.032	BL	0.0422173	8	0.158157
Trial 2	F6	P	F	0:01:07.032-0:01:07.298	BL	0.0603798	8	0.226196
Trial 2	F6	P	F	0:01:07.298-0:01:07.564	BL	0.0636985	8	0.238631
Trial 2	F6	P	F	0:01:07.564-0:01:07.830	BL	0.0598032	8	0.224037
Trial 2	F6	P	F	0:01:07.830-0:01:08.096	BL	0.0975994	8	0.365632
Trial 2	F6	P	F	0:01:08.096-0:01:08.362	BL	0.0662458	8	0.248174
Trial 2	F6	P	F	0:01:08.362-0:01:08.628	BL	0.0753218	8	0.282174
Trial 2	F6	P	F	0:01:08.628-0:01:08.894	BL	0.0631389	8	0.236535
Trial 2	F6	P	F	0:01:08.894-0:01:09.160	BL	0.0653834	8	0.244944
Trial 2	F6	P	F	0:01:09.160-0:01:09.426	BL	0.041462	8	0.155327
Trial 2	F6	P	F	0:01:09.426-0:01:09.692	BL	0.0462342	8	0.173205
Trial 2	F6	P	F	0:01:09.692-0:01:09.958	BL	0.105992	8	0.397072
Trial 2	F6	P	F	0:01:09.958-0:01:10.224	BL	0.0736209	8	0.275804
Trial 2	F6	P	F	0:01:10.224-0:01:10.490	BL	0.103192	8	0.386584
Trial 2	F6	P	F	0:01:10.490-0:01:10.756	BL	0.0908541	8	0.340363
Trial 2	F6	P	F	0:01:10.756-0:01:11.022	BL	0.0808101	8	0.302738
Trial 2	F6	P	F	0:01:11.022-0:01:11.288	BL	0.0448406	8	0.167983
Trial 2	F6	P	F	0:01:11.288-0:01:11.554	BL	0.0920112	8	0.344697
Trial 2	F6	P	F	0:01:11.554-0:01:11.820	BL	0.0251419	8	0.0941877
Trial 2	F6	P	F	0:01:11.820-0:01:12.086	BL	0.104495	8	0.391463
Trial 2	F6	P	F	0:01:12.086-0:01:12.352	BL	0.0820243	8	0.307285
Trial 2	F6	P	F	0:01:12.352-0:01:12.618	BL	0.133659	8	0.500721
Trial 2	F6	P	F	0:01:12.618-0:01:12.884	BL	0.0687295	8	0.257479
Trial 2	F6	P	F	0:01:12.884-0:01:13.150	BL	0.0815945	8	0.305673
Trial 2	F6	P	F	0:01:13.150-0:01:13.416	BL	0.0641421	8	0.240291
Trial 2	F6	P	F	0:01:13.416-0:01:13.682	BL	0.0249528	8	0.0934796
Trial 2	F6	P	F	0:01:13.682-0:01:13.948	BL	0.087177	8	0.326588
Trial 2	F6	P	F	0:01:13.948-0:01:14.214	BL	0.0524408	8	0.196457
Trial 2	F6	P	F	0:01:14.214-0:01:14.480	BL	0.0636753	8	0.238542
Trial 2	F6	P	F	0:01:14.480-0:01:14.746	BL	0.0680356	8	0.254879
Trial 2	F6	P	F	0:01:14.746-0:01:15.012	BL	0.0478257	8	0.179167
Trial 2	F6	P	F	0:01:15.012-0:01:15.278	BL	0.100337	8	0.375886
Trial 2	F6	P	F	0:01:15.278-0:01:15.544	BL	0.0761056	8	0.285113
Trial 2	F6	P	F	0:01:15.544-0:01:15.810	BL	0.0838621	8	0.314167
Trial 2	F6	P	F	0:01:15.810-0:01:16.076	BL	0.0535515	7	0.229276
Trial 2	F6	P	F	0:01:16.076-0:01:16.342	BL	0.0581278	8	0.217761
Trial 2	F6	P	F	0:01:16.342-0:01:16.608	BL	0.0526852	8	0.197371
Trial 2	F6	P	F	0:01:16.608-0:01:16.874	BL	0.0778213	8	0.291539
Trial 2	F6	P	F	0:01:16.874-0:01:17.140	BL	0.10773	8	0.403588
Trial 2	F6	P	F	0:01:17.140-0:01:17.406	BL	0.0577212	8	0.216237
Trial 2	F6	P	F	0:01:17.406-0:01:17.672	BL	0.139054	8	0.520932
Trial 2	F6	P	F	0:01:17.672-0:01:17.938	BL	0.125204	8	0.46905
Trial 2	F6	P	F	0:01:17.938-0:01:18.204	BL	0.131755	8	0.493584
Trial 2	F6	P	F	0:01:18.204-0:01:18.470	BL	0.140974	8	0.528125
Trial 2	F6	P	F	0:01:18.470-0:01:18.736	BL	0.0997865	8	0.373825
Trial 2	F6	P	F	0:01:18.736-0:01:19.002	BL	0.0746489	8	0.279653
Trial 2	F6	P	F	0:01:19.002-0:01:19.268	BL	0.0332517	8	0.124569
Trial 2	F6	P	F	0:01:19.268-0:01:19.534	BL	0.0744189	8	0.278792
Trial 2	F6	P	F	0:01:19.534-0:01:19.800	BL	0.0552493	8	0.20698
Trial 2	F6	P	F	0:01:19.800-0:01:20.066	BL	0.122627	8	0.45939
Trial 2	F6	P	F	0:01:20.066-0:01:20.332	BL	0.0751947	8	0.281699
Trial 2	F6	P	F	0:01:20.332-0:01:20.598	BL	0.0812892	8	0.304529
Trial 2	F6	P	F	0:01:20.598-0:01:20.864	BL	0.04357	8	0.163223
Trial 2	F6	P	F	0:01:20.864-0:01:21.130	BL	0.0606568	8	0.227237
Trial 2	F6	P	F	0:01:21.130-0:01:21.396	BL	0.116266	8	0.435558
Trial 2	F6	P	F	0:01:21.396-0:01:21.662	BL	0.0434759	8	0.162872
Trial 2	F6	P	F	0:01:21.662-0:01:21.928	BL	0.0587739	8	0.220181
Trial 2	F6	P	F	0:01:21.928-0:01:22.194	BL	0.0960978	8	0.360007
Trial 2	F6	P	F	0:01:22.194-0:01:22.460	BL	0.0866599	8	0.324649
Trial 2	F6	P	F	0:01:22.460-0:01:22.726	BL	0.0512039	8	0.191823
Trial 2	F6	P	F	0:01:22.726-0:01:22.992	BL	0.0871529	8	0.326498
Trial 2	F6	P	F	0:01:22.992-0:01:23.258	BL	0.0510932	8	0.191407
Trial 2	F6	P	F	0:01:23.258-0:01:23.524	BL	0.0935373	8	0.350413
Trial 2	F6	P	F	0:01:23.524-0:01:23.790	BL	0.0508071	8	0.190338
Trial 2	F6	P	F	0:01:23.790-0:01:24.056	BL	0.0579876	8	0.217236
Trial 2	F6	P	F	0:01:24.056-0:01:24.322	BL	0.0873785	8	0.327341
Trial 2	F6	P	F	0:01:24.322-0:01:24.588	BL	0.100995	8	0.378354
Trial 2	F6	P	F	0:01:24.588-0:01:24.854	BL	0.0870561	8	0.326133
Trial 2	F6	P	F	0:01:24.854-0:01:25.120	BL	0.0921644	8	0.345271
Trial 2	F6	P	F	0:01:25.120-0:01:25.386	BL	0.123785	8	0.463728
Trial 2	F6	P	F	0:01:25.386-0:01:25.652	BL	0.0867345	7	0.37135
Trial 2	F6	P	F	0:01:25.652-0:01:25.918	BL	0.0996324	8	0.373249
Trial 2	F6	P	F	0:01:25.918-0:01:26.184	BL	0.0600241	8	0.224865
Trial 2	F6	P	F	0:01:26.184-0:01:26.450	BL	0.0890505	8	0.333604
Trial 2	F6	P	F	0:01:26.450-0:01:26.716	BL	0.105398	8	0.394849
Trial 2	F6	P	F	0:01:26.716-0:01:26.982	BL	0.0918476	8	0.344085
Trial 2	F6	P	F	0:01:26.982-0:01:27.248	BL	0.0812461	8	0.304369
Trial 2	F6	P	F	0:01:27.248-0:01:27.514	BL	0.0403317	8	0.151092
Trial 2	F6	P	F	0:01:27.514-0:01:27.780	BL	0.0559384	8	0.209558
Trial 2	F6	P	F	0:01:27.780-0:01:28.046	BL	0.084353	8	0.316009
Trial 2	F6	P	F	0:01:28.046-0:01:28.312	BL	0.103233	8	0.386737
Trial 2	F6	P	F	0:01:28.312-0:01:28.578	BL	0.0456282	8	0.170934
Trial 2	F6	P	F	0:01:28.578-0:01:28.844	BL	0.0751729	8	0.281616
Trial 2	F6	P	F	0:01:28.844-0:01:29.110	BL	0.0979131	8	0.366809
Trial 2	F6	P	F	0:01:29.110-0:01:29.376	BL	0.0500067	8	0.187338
Trial 2	F6	P	F	0:01:29.376-0:01:29.642	BL	0.0946949	8	0.354748
Trial 2	F6	P	F	0:01:29.642-0:01:29.908	BL	0.0666284	8	0.249606
Trial 2	F6	P	F	0:01:29.908-0:01:30.174	BL	0.0895193	8	0.335361
Trial 2	F6	P	F	0:01:30.174-0:01:30.440	BL	0.0537899	8	0.201513
Trial 2	F6	P	F	0:01:30.440-0:01:30.706	BL	0.0535098	8	0.20046
Trial 2	F6	P	F	0:01:30.706-0:01:30.972	BL	0.0872694	8	0.326931
Trial 2	F6	P	F	0:01:30.972-0:01:31.238	BL	0.0510288	8	0.191168
Trial 2	F6	P	F	0:01:31.238-0:01:31.504	BL	0.0643709	8	0.241148
Trial 2	F6	P	F	0:01:31.504-0:01:31.770	BL	0.0364355	8	0.136496
Trial 2	F6	P	F	0:01:31.770-0:01:32.036	BL	0.0757361	8	0.283729
Trial 2	F6	P	F	0:01:32.036-0:01:32.302	BL	0.0664216	8	0.248832
Trial 2	F6	P	F	0:01:32.302-0:01:32.568	BL	0.0839856	8	0.314629
Trial 2	F6	P	F	0:01:32.568-0:01:32.834	BL	0.0512025	8	0.191816
Trial 2	F6	P	F	0:01:32.834-0:01:33.100	BL	0.107772	8	0.403739
Trial 2	F6	P	F	0:01:33.100-0:01:33.366	BL	0.0799579	8	0.299543
Trial 2	F6	P	F	0:01:33.366-0:01:33.632	BL	0.0536649	8	0.201042
Trial 2	F6	P	F	0:01:33.632-0:01:33.898	BL	0.0767103	8	0.287375
Trial 2	F6	P	F	0:01:33.898-0:01:34.164	BL	0.0857423	8	0.321212
Trial 2	F6	P	F	0:01:34.164-0:01:34.430	BL	0.120458	8	0.451262
Trial 2	F6	P	F	0:01:34.430-0:01:34.696	BL	0.0748815	8	0.280524
Trial 2	F6	P	F	0:01:34.696-0:01:34.962	BL	0.0502313	8	0.188179
Trial 2	F6	P	F	0:01:34.962-0:01:35.228	BL	0.071651	7	0.306769
Trial 2	F6	P	F	0:01:35.228-0:01:35.494	BL	0.0701119	8	0.262657
Trial 2	F6	P	F	0:01:35.494-0:01:35.760	BL	0.125821	8	0.471359
Trial 2	F6	P	F	0:01:35.760-0:01:36.026	BL	0.0247208	8	0.0926105
Trial 2	F6	P	F	0:01:36.026-0:01:36.292	BL	0.114926	8	0.430541
Trial 2	F6	P	F	0:01:36.292-0:01:36.558	BL	0.0709821	8	0.265918
Trial 2	F6	P	F	0:01:36.558-0:01:36.824	BL	0.077661	8	0.29094
Trial 2	F6	P	F	0:01:36.824-0:01:37.090	BL	0.0617798	8	0.231443
Trial 2	F6	P	F	0:01:37.090-0:01:37.356	BL	0.146661	8	0.549431
Trial 2	F6	P	F	0:01:37.356-0:01:37.622	BL	0.129735	8	0.486018
Trial 2	F6	P	F	0:01:37.622-0:01:37.888	BL	0.0672808	8	0.252049
Trial 2	F6	P	F	0:01:37.888-0:01:38.154	BL	0.0965935	8	0.361865
Trial 2	F6	P	F	0:01:38.154-0:01:38.420	BL	0.0889483	8	0.333222
Trial 2	F6	P	F	0:01:38.420-0:01:38.686	BL	0.12241	8	0.458577
Trial 2	F6	P	F	0:01:38.686-0:01:38.952	BL	0.0220473	8	0.0825946
Trial 2	F6	P	F	0:01:38.952-0:01:39.218	BL	0.0468659	8	0.175571
Trial 2	F6	P	F	0:01:39.218-0:01:39.484	BL	0.0573484	8	0.214842
Trial 2	F6	P	F	0:01:39.484-0:01:39.750	BL	0.0704953	8	0.264092
Trial 2	F6	P	F	0:01:39.750-0:01:40.016	BL	0.0726195	8	0.272052
Trial 2	F6	P	F	0:01:40.016-0:01:40.282	BL	0.0302473	8	0.113313
Trial 2	F6	P	F	0:01:40.282-0:01:40.548	BL	0.0467424	8	0.175108
Trial 2	F6	P	F	0:01:40.548-0:01:40.814	BL	0.0417297	8	0.15633
Trial 2	F6	P	F	0:01:40.814-0:01:41.080	BL	0.0617839	8	0.231459
Trial 2	F6	P	F	0:01:41.080-0:01:41.346	BL	0.0897727	8	0.336311
Trial 2	F6	P	F	0:01:41.346-0:01:41.612	BL	0.132865	8	0.497747
[truncated: 49,621 more rows]
