# Supplementary material for: Conditional and unconditional components of aversively motivated freezing, flight and darting in mice
Source: eLife. 2022 May 26;11:e75663. doi: 10.7554/eLife.75663 (PMC9173745; doi:10.7554/eLife.75663)
Supplement: Figure 8—figure supplement 1—source data 1. [file elife-75663-fig8-figsupp1-data1.xlsx]

## Sheet: Data
Data from all groups of Experiment 4 for freezing, PAR, and darting across Day 1 & 2 - habituation and Day 3 & 4 - acquisition and Day 5 - testing.
Grey = Data Irrelevant/Not Available
As seen in Figure 8-figure supplement 1
					Habitution Day 1						Habitution Day 2						Acquisition Day 3						Acquisition Day 4						Test Day 3
Experiment	Group	Measure	Sex	CS	BL	1	2	3	4	5	BL	1	2	3	4	5	BL	1	2	3	4	5	BL	6	7	8	9	10	BL	1	2	3
4	Paired-NoHab	Freezing	F	10s-Hab	5.9281	0	23.3334	18.6666	0	0	13.857	0	0	35.3334	13.3334	13.6666
4	Paired-NoHab	Freezing	F	10s-Hab	1.87107	18	8.66667	0	0	0	6.4098	10	0	0	0	38
4	Paired-NoHab	Freezing	F	10s-Hab	0	0	0	0	0	11.6666	1.25973	0	13	0	0	0
4	Paired-NoHab	Freezing	F	10s-Hab	9.35533	26.3334	0	54.3334	3.33334	0	19.5072	0	36.3334	42.3334	70.3334	0
4	Paired-NoHab	Freezing	M	10s-Hab	0.611337	0	16.3334	0	36	0	47.7399	100	11.6666	13.3334	0	0
4	Paired-NoHab	Freezing	M	10s-Hab	2.42683	0.333337	0	12.3334	0	0	3.44572	2.66667	10.3334	85.0001	0	0
4	Paired-NoHab	Freezing	M	10s-Hab	0	0	0	0	43	0	0	14	11	0	12.6666	0
4	Paired-NoHab	Freezing	M	10s-Hab	0.574288	13	0	0	31	0	7.24344	39.3334	32	27.3334	0	25.3334
4	Paired-NoHab	Freezing	F	Noise													29.4554	36.3334	45.6667	90.6667	94.3335	18	98.4441	49.6667	35.6667	49.6667	38	53	39.0733	86.6667	94.6667	89.3335
4	Paired-NoHab	Freezing	F	Noise													34.7166	10.3334	81.3334	77.0001	74.6667	57.6667	97.8139	54.6667	48.3334	61.0001	63.0001	46.3334	81.5202	37.3334	66.0001	74.0001
4	Paired-NoHab	Freezing	F	Noise													4.68693	0	31	44.3334	53.3334	53.3334	90.0333	42.6667	21.6667	54.6667	25.3334	24.3334	89.9352	1.66667	95.0001	90.6667
4	Paired-NoHab	Freezing	F	Noise													19.8222	15.3334	80.6667	86.0001	75.3334	11	96.2394	17.3334	13	3.66667	64.6667	49	90.1946	47.6667	53.6667	81.3334
4	Paired-NoHab	Freezing	M	Noise													9.92958	34.3334	95.0001	57.6667	93.3335	83.0001	96.4248	1	37.6667	62.6667	62.0001	59.0001	97.1458	33.3334	58.6667	63.3334
4	Paired-NoHab	Freezing	M	Noise													30.5298	46.6667	90.6667	64.0001	35	82.0001	99.8149	1.66667	18	15.3334	60.6667	36	98.9434	3.33334	67.0001	31.3334
4	Paired-NoHab	Freezing	M	Noise													0.778065	13	37.3334	42	24	25	96.3693	16	1	61.0001	13.3334	43.3334	98.3318	74.3334	16.6666	47.6667
4	Paired-NoHab	Freezing	M	Noise													36.2357	71.0001	89.0001	94.6667	57.0001	94.6667	89.9406	30.3334	27	69.3334	91.3334	68.6667	99.1845	94.3335	95.3335	95.0001
4	Paired-Hab	Freezing	F	Noise	3.07521	32.6667	73.6667	48.3334	46.3334	72.0001	28.5847	83.0001	52.3334	82.0001	87.3335	55.6667	17.5436	56.3334	95.3335	98.6667	34	85.3334	67.9139	1	42	69.3334	45.6667	35	87.8592	28.3334	59.3334	36.6667
4	Paired-Hab	Freezing	F	Noise	5.70579	12	36	54.0001	42.3334	65.3334	18.8959	40	41.3334	60.0001	43	76.0001	4.33494	43.3334	90.6667	80.3335	79.3334	52.6667	98.0732	57.0001	61.0001	0.333337	45.6667	12.3334	94.3282	33	86.6667	27.6667
4	Paired-Hab	Freezing	F	Noise	0	0	0	12.3334	26.6667	0	1.29678	0	19.3334	0	28.3334	15	1.18563	13	0	50.6667	16.6666	13.6666	94.0535	47.3334	78.6667	63.3334	63.6667	50	90.584	100	95.3335	64.6667
4	Paired-Hab	Freezing	F	Noise	3.05669	30	34.3334	25.3334	37.6667	35.3334	24.4165	70.0001	75.3334	61.0001	66.0001	70.3334	21.5635	50	88.3334	95.3335	95.0001	58.3334	87.5326	70.6667	89.3335	93.3335	70.3334	60.0001	63.4104	76.3334	94.3335	75.0001
4	Paired-Hab	Freezing	M	Noise	3.33457	0	24.3334	0	28	0	11.2635	0	53.3334	11	29.3334	39.3334	25.6762	35.3334	60.3334	85.3335	52.3334	70.0001	78.0658	42.6667	26	69.6667	73.3334	46.6667	56.5898	76.3334	68.6667	45.3334
4	Paired-Hab	Freezing	M	Noise	8.94775	37.3334	0	71.3334	62.3334	88.6667	35.5502	50.3334	71.6667	88.6667	58.6667	98.0001	45.3131	62.0001	92.0001	94.6667	94.0001	74.0001	88.9034	5.33334	54.6667	41.6667	47.6667	77.3334	88.3225	53.3334	48	81.6667
4	Paired-Hab	Freezing	M	Noise	0	0	0	0	0	0	0	0	38.6667	39.3334	13.3334	14.3334	0	10.3334	40.6667	25	57.3334	0	97.5175	65.0001	15.6666	48.3334	35.3334	52.0001	99.1106	49.3334	49.6667	87.0001
4	Paired-Hab	Freezing	M	Noise	3.22342	20.3334	23	57.6667	41.6667	48.3334	11.5413	48.3334	87.0001	70.6667	39.6667	71.6667	27.1026	93.0001	100	76.6667	99.3335	90.0001	95.6836	59.0001	41	52.3334	68.3334	40.0001	97.4607	30.3334	61	55.3334
4	ShockOnly-NoHab	Freezing	F	10s-Hab/PreUS	0	0	0	0	21	15.3334	1.75991	11	0	10.3334	0	25.6667	9.09594	9.66667	100	100	99.3335	99.0001	89.6813	51.3334	86.3335	100	100	100
4	ShockOnly-NoHab	Freezing	F	10s-Hab/PreUS	4.53872	39	0	0	0	20.6666	4.70545	0	26.3334	0	0	0	4.33494	0	19	0	99.3335	99.0001	56.8359	17.6666	100	70.3334	99.3335	94.3335
4	ShockOnly-NoHab	Freezing	F	10s-Hab/PreUS	0	0	0	0	0	0	1.72286	0	0	0	0	0	0.852169	0	35	63	59.6667	30.6667	90.4408	98.6667	100	100	99.3335	98.6667
4	ShockOnly-NoHab	Freezing	F	10s-Hab/PreUS	9.35533	0	43	19.6666	28.6667	0	64.0424	0	100	69.3334	21.3334	34.6667	15.9689	8.00001	94.0001	100	99.3335	100	94.6093	100	100	100	86.6667	99.0001
4	ShockOnly-NoHab	Freezing	M	10s-Hab/PreUS	5.98367	34	0	0	27.6667	32	31.03	0	22.3334	0	18	0	21.8229	0	27	100	99.3335	99.0001	99.9815	100	0	63.3334	99.6667	99.0001
4	ShockOnly-NoHab	Freezing	M	10s-Hab/PreUS	4.8907	1.33334	19.3334	11.3334	0	0	27.5102	0	0	65.0001	20.6667	0	28.1215	49.6667	51.6667	90.6667	99.6667	99.3335	91.4968	100	100	100	38	99.0001
4	ShockOnly-NoHab	Freezing	M	10s-Hab/PreUS	2.37125	0	0	0	0	10.6666	3.03816	0	0	0	0	0	0.87069	0	6.00001	81.3334	57.0001	0	99.8149	100	65.0001	100	99.6667	38
4	ShockOnly-NoHab	Freezing	M	10s-Hab/PreUS	4.55725	0	0	11.6666	0	26.3334	6.89144	6.33334	11.6666	80.6667	27	59.3334	18.3031	0	74.3334	100	77.0001	94.3335	75.7689	98.6667	100	93.3335	99.3335	20.6666
4	ShockOnly-NoHab	Freezing	F	Noise																									57.3497	55.3334	47	56.3334
4	ShockOnly-NoHab	Freezing	F	Noise																									59.4257	8.66667	54.6667	0.666663
4	ShockOnly-NoHab	Freezing	F	Noise																									54.5506	57.3334	23.3334	31.3334
4	ShockOnly-NoHab	Freezing	F	Noise																									99.5184	1	31	76.6667
4	ShockOnly-NoHab	Freezing	M	Noise																									49.3606	69.0001	77.3334	0.333327
4	ShockOnly-NoHab	Freezing	M	Noise																									93.8832	4.00001	43.3334	45.6667
4	ShockOnly-NoHab	Freezing	M	Noise																									94.4026	68.3334	0.666663	59.6667
4	ShockOnly-NoHab	Freezing	M	Noise																									55.1808	12	56.6667	0.666663
4	ShockOnly-Hab	Freezing	F	Noise	11.1152	11	0	15.6666	15.3334	41.6667	16.6728	51.3334	68.3334	34.6667	37.3334	54.6667													53.976	75.0001	0.666663	48.3334
4	ShockOnly-Hab	Freezing	F	Noise	7.85477	40	61.3334	28	89.6667	58.6667	24.9352	76.6667	46.3334	42.6667	64.0001	62.3334													86.3577	35.3334	80.0001	87.0001
4	ShockOnly-Hab	Freezing	F	Noise	0	0	0	0	0	0	0.611337	0	22.3334	40.3334	19.6666	0													92.9566	38.3334	50.6667	59.3334
4	ShockOnly-Hab	Freezing	F	Noise	13.153	0	69.3334	67.6667	61.0001	70.0001	27.3991	71.3334	63.0001	69.0001	88.0001	44													82.929	1.33334	83.6667	40.3334
4	ShockOnly-Hab	Freezing	M	Noise	7.22489	0	43.6667	41	27	53	14.6351	48.3334	66.0001	55.3334	83.0001	86.6667													56.1076	67.6667	66.0001	67.3334
4	ShockOnly-Hab	Freezing	M	Noise	2.5565	27.3334	56.0001	64.6667	45.6667	83.3334	22.4343	31.6667	70.0001	38	64.0001	65.3334													99.8333	24.6667	47.3334	91.0001
4	ShockOnly-Hab	Freezing	M	Noise	0	0	0	0	0	0	0	0	32	10	0	0													90.2874	1.33334	11.3334	0.333327
4	ShockOnly-Hab	Freezing	M	Noise	6.78028	2	0	8	0	0.666673	10.2075	11	14.6666	15.3334	35	13													88.1186	1.33334	22	29.6667
4	ShockOnly-Hab	Freezing	F	PreUS													10.2631	0	39.3334	96.0001	83.0001	99.6667	98.2587	26	100	99.6667	94.3335	99.0001
4	ShockOnly-Hab	Freezing	F	PreUS													17.3213	0	55.6667	80.3334	99.3335	99.3335	98.3697	100	100	43	100	100
4	ShockOnly-Hab	Freezing	F	PreUS													3.70508	0	27.3334	70.3334	16	46.3334	97.1655	100	100	99.6667	95.3335	98.6667
4	ShockOnly-Hab	Freezing	F	PreUS													21.1745	0	100	100	100	99.0001	99.4629	100	100	99.6667	99.6667	99.3335
4	ShockOnly-Hab	Freezing	M	PreUS													21.0078	59.3334	66.6667	100	99.6667	71.3334	90.9782	100	100	99.6667	74.3334	79.6667
4	ShockOnly-Hab	Freezing	M	PreUS													21.1004	26.6667	96.0001	46	99.3335	99.3335	93.6643	100	100	93.6667	99.3335	55.3334
4	ShockOnly-Hab	Freezing	M	PreUS													0	0	0	24	55.0001	13.6666	90.589	99.6667	100	100	99.3335	100
4	ShockOnly-Hab	Freezing	M	PreUS													13.8384	0	5.33334	53	90.3334	99.3335	81.0673	100	100	84.0001	100	99.3335
4	Paired-NoHab	PAR	F	10s-Hab		0.558	0.543	0.188	0.434	0.516		0.418	0.256	0.318	0.439	0.415
4	Paired-NoHab	PAR	F	10s-Hab		0.531	0.363	0.755	0.587	0.622		0.407	0.664	0.496	0.68	0.373
4	Paired-NoHab	PAR	F	10s-Hab		0.585	0.545	0.724	0.483	0.527		0.594	0.42	0.37	0.291	0.65
4	Paired-NoHab	PAR	F	10s-Hab		0.447	0.611	0.543	0.532	0.531		0.63	0.305	0.306	0.31	0.512
4	Paired-NoHab	PAR	M	10s-Hab		0.39	0.585	0.539	0.585	0.459		0.441	0.473	0.45	0.441	0.487
4	Paired-NoHab	PAR	M	10s-Hab		0.51	0.758	0.7	0.527	0.561		0.716	0.555	0.119	0.377	0.535
4	Paired-NoHab	PAR	M	10s-Hab		0.367	0.553	0.594	0.195	0.26		0.544	0.571	0.422	0.766	0.511
4	Paired-NoHab	PAR	M	10s-Hab		0.516	0.749	0.65	0.546	0.575		0.509	0.408	0.441	0.432	0.421
4	Paired-NoHab	PAR	F	Noise														0.541	0.691	0.764	0.984	0.98		0.99	0.96	0.88	0.98	0.99		0.558	0.783	0.68
4	Paired-NoHab	PAR	F	Noise														0.542	0.114	0.917	1	1		1	1	1	1	1		0.886	0.999	1
4	Paired-NoHab	PAR	F	Noise														0.602	0.582	0.964	0.911	0.356		0.25	1	1	1	1		0.95	0.516	0.948
4	Paired-NoHab	PAR	F	Noise														0.534	0.847	0.963	0.931	0.96		1	0.76	0.64	0.98	1		0.977	1	1
4	Paired-NoHab	PAR	M	Noise														0.565	0.675	1	1	0.999		1	1	1	1	1		1	0.775	1
4	Paired-NoHab	PAR	M	Noise														0.077	0.88	1	0.998	0.989		1	1	1	1	1		0.985	0.998	1
4	Paired-NoHab	PAR	M	Noise														0.678	0.631	0.968	0.995	0.969		1	1	1	1	1		0.996	1	0.998
4	Paired-NoHab	PAR	M	Noise														0.641	0.535	0.999	1	0.993		0.99	1	1	1	1		0.342	0.903	1
4	Paired-Hab	PAR	F	Noise		0.477	0.431	0.868	0.659	0.368		0.373	0.522	0.457	0.145	0.692		0.207	0.931	0.666	1	1		1	1	0.68	1	1		1	1	1
4	Paired-Hab	PAR	F	Noise		0.551	0.277	0.636	0.761	0.867		0.638	0.617	0.097	0.353	0.719		0.278	0.024	0.986	0.998	1		1	1	0.94	1	1		1	0.998	1
4	Paired-Hab	PAR	F	Noise		0.47	0.577	0.326	0.395	0.447		0.466	0.64	0.317	0.587	0.972		0.423	0.879	0.923	0.976	0.988		0.92	0.8	0.93	0.96	1		0.91	0.996	0.624
4	Paired-Hab	PAR	F	Noise		0.477	0.332	0.638	0.613	0.422		0.422	0.642	0.443	0.463	0.701		0.712	0.151	0.999	0.996	0.996		1	1	1	1	1		0.96	0.852	1
4	Paired-Hab	PAR	M	Noise		0.654	0.371	0.692	0.229	0.535		0.397	0.212	0.662	0.562	0.448		0.386	0.245	0.818	0.979	0.999		0.94	0.74	1	1	1		0.983	1	1
4	Paired-Hab	PAR	M	Noise		0.329	0.374	0.387	0.754	0.606		0.514	0.312	0.265	0.445	0.555		0.316	0.656	0.997	0.985	0.656		1	0.98	0.96	1	1		1	1	1
4	Paired-Hab	PAR	M	Noise		0.504	0.573	0.497	0.608	0.539		0.355	0.605	0.553	0.218	0.514		0.619	0.483	0.985	1	0.996		1	1	1	1	1		0.993	0.998	0.998
4	Paired-Hab	PAR	M	Noise		0.353	0.492	0.709	0.534	0.75		0.688	0.672	0.71	0.617	0.832		0.558	0.632	0.706	0.873	0.999		1	1	1	0.99	1		0.98	1	1
4	ShockOnly-NoHab	PAR	F	10s-Hab/PreUS		0.502	0.444	0.572	0.682	0.426		0.71	0.634	0.37	0.524	0.546		0.621	0.844	0.5	0.5	0.5		1	1	0.01	0	0.5
4	ShockOnly-NoHab	PAR	F	10s-Hab/PreUS		0.543	0.715	0.595	0.234	0.509		0.452	0.573	0.552	0.349	0.535		0.51	0.164	0.567	0.083	0.5		0.48	0.5	0.96	0.5	0.88
4	ShockOnly-NoHab	PAR	F	10s-Hab/PreUS		0.536	0.606	0.372	0.403	0.525		0.681	0.596	0.389	0.73	0.121		0.349	0.635	0.5	0.5	0.917		0.08	0	0.5	0.5	0.21
4	ShockOnly-NoHab	PAR	F	10s-Hab/PreUS		0.711	0.449	0.478	0.698	0.666		0.492	0.445	0.276	0.859	0.431		0.436	0.161	0.446	0.5	0.083		1	0	0.5	0.41	0.5
4	ShockOnly-NoHab	PAR	M	10s-Hab/PreUS		0.344	0.536	0.684	0.419	0.539		0.529	0.325	0.517	0.554	0.429		0.505	0.719	0.5	0.5	0.5		0.5	0.27	0.16	0.5	0.99
4	ShockOnly-NoHab	PAR	M	10s-Hab/PreUS		0.633	0.652	0.553	0.563	0.264		0.885	0.791	0.894	0.314	0.83		0.234	0.738	0.5	0.917	0.5		0.92	0.08	0.5	0.75	0.08
4	ShockOnly-NoHab	PAR	M	10s-Hab/PreUS		0.502	0.384	0.528	0.512	0.407		0.608	0.675	0.58	0.58	0.437		0.486	0.438	0.5	0.083	0.917		0.92	0.9	0.5	0.92	0.61
4	ShockOnly-NoHab	PAR	M	10s-Hab/PreUS		0.483	0.425	0.774	0.431	0.225		0.399	0.462	0.275	0.37	0.182		0.689	0.239	0.293	0.997	0.997		1	0	1	0.08	0.42
4	ShockOnly-NoHab	PAR	F	Noise																										0.923	0.798	0.835
4	ShockOnly-NoHab	PAR	F	Noise																										0.976	0.967	0.974
4	ShockOnly-NoHab	PAR	F	Noise																										0.956	0.981	0.999
4	ShockOnly-NoHab	PAR	F	Noise																										1	0.972	1
4	ShockOnly-NoHab	PAR	M	Noise																										0.575	0.73	0.45
4	ShockOnly-NoHab	PAR	M	Noise																										1	1	0.997
4	ShockOnly-NoHab	PAR	M	Noise																										1	1	1
4	ShockOnly-NoHab	PAR	M	Noise																										1	0.716	0.764
4	ShockOnly-Hab	PAR	F	Noise		0.751	0.554	0.635	0.572	0.588		0.768	0.694	0.417	0.393	0.375														0.791	0.968	0.232
4	ShockOnly-Hab	PAR	F	Noise		0.568	0.586	0.922	0.236	0.639		0.142	0.193	0.848	0.966	0.358														0.999	0.998	0.995
4	ShockOnly-Hab	PAR	F	Noise		0.391	0.507	0.581	0.515	0.395		0.12	0.714	0.641	0.5	0.319														0.794	0.755	0.983
4	ShockOnly-Hab	PAR	F	Noise		0.535	0.396	0.784	0.518	0.543		0.35	0.598	0.435	0.567	0.46														1	0.999	1
4	ShockOnly-Hab	PAR	M	Noise		0.432	0.401	0.433	0.548	0.343		0.254	0.378	0.57	0.357	0.574														0.598	1	0.363
4	ShockOnly-Hab	PAR	M	Noise		0.659	0.67	0.853	0.549	0.338		0.22	0.218	0.855	0.181	0.632														1	0.511	1
4	ShockOnly-Hab	PAR	M	Noise		0.58	0.546	0.659	0.684	0.629		0.523	0.635	0.397	0.832	0.565														1	0.995	1
4	ShockOnly-Hab	PAR	M	Noise		0.49	0.451	0.505	0.578	0.279		0.468	0.524	0.457	0.605	0.475														1	0.895	1
4	ShockOnly-Hab	PAR	F	PreUS														0.486	0.425	0.698	0.366	0.5		0.22	0.46	0.53	0.48	0.5
4	ShockOnly-Hab	PAR	F	PreUS														0.041	0.705	0.823	0.5	0.5		0.08	0.26	1	0.5	0.61
4	ShockOnly-Hab	PAR	F	PreUS														0.402	0.618	0.5	0.917	0.917		0.08	0.92	0.92	0.6	0.5
4	ShockOnly-Hab	PAR	F	PreUS														0.418	0.42	0.996	0.083	0.083		1	0.5	0.5	0.08	0.5
4	ShockOnly-Hab	PAR	M	PreUS														0.205	0.294	0.737	0.634	1		0.95	0	0.29	0.99	1
4	ShockOnly-Hab	PAR	M	PreUS														0.89	0.12	0.917	0.5	0.5		0.5	0.08	0.39	0.08	0.9
4	ShockOnly-Hab	PAR	M	PreUS														0.488	0.515	0.443	0.431	0.177		0.27	0.5	0.03	0.92	0.5
4	ShockOnly-Hab	PAR	M	PreUS														0.677	0.522	0.918	0.876	0.446		0.5	0.5	0.54	1	0.5
4	Paired-NoHab	Darting	F	10s-Hab	2	6	0	0	6	0	1	6	6	0	0	0
4	Paired-NoHab	Darting	F	10s-Hab	2.33333	0	0	0	0	0	1	0	0	0	0	0
4	Paired-NoHab	Darting	F	10s-Hab	0.333333	0	0	0	0	0	0.666667	0	0	6	0	0
4	Paired-NoHab	Darting	F	10s-Hab	1.66667	0	0	0	0	0	0.333333	0	6	0	0	0
4	Paired-NoHab	Darting	M	10s-Hab	0	6	0	6	0	0	1.66667	0	0	6	0	0
4	Paired-NoHab	Darting	M	10s-Hab	1.33333	6	0	6	6	0	2.66667	0	0	0	0	6
4	Paired-NoHab	Darting	M	10s-Hab	0	6	0	0	0	0	0.333333	0	0	0	0	6
4	Paired-NoHab	Darting	M	10s-Hab	0.666667	0	0	0	0	0	4.33333	0	0	6	0	0
4	Paired-NoHab	Darting	F	Noise													2	6	6	0	0	18	0	6	18	12	18	12	2.33333	0	0	0
4	Paired-NoHab	Darting	F	Noise													1.66667	6	0	0	6	6	0	12	6	6	6	6	0	6	6	6
4	Paired-NoHab	Darting	F	Noise													1.66667	0	0	0	0	0	0	0	12	12	6	18	0	6	0	0
4	Paired-NoHab	Darting	F	Noise													2.66667	18	0	0	6	18	0	18	6	12	6	12	0	12	0	6
4	Paired-NoHab	Darting	M	Noise													0.666667	6	0	6	0	0	0	18	18	6	12	6	0	6	12	0
4	Paired-NoHab	Darting	M	Noise													0.333333	0	0	6	18	0	0	12	12	12	6	12	0	12	0	6
4	Paired-NoHab	Darting	M	Noise													0.333333	6	0	0	12	12	0	6	24	6	24	6	0	6	12	12
4	Paired-NoHab	Darting	M	Noise													0.333333	0	0	0	6	0	0	18	12	6	0	6	0	0	0	0
4	Paired-Hab	Darting	F	Noise	1.66667	6	0	6	6	0	0.333333	0	6	0	0	6	1.33333	0	0	0	6	0	0.333333	12	6	0	18	12	0.333333	18	0	12
4	Paired-Hab	Darting	F	Noise	3	0	0	6	0	6	3.33333	0	0	0	6	6	0.333333	0	0	0	6	6	0	6	12	12	12	12	0	18	6	6
4	Paired-Hab	Darting	F	Noise	1.33333	0	6	0	0	0	1	0	0	0	0	0	0.333333	0	0	0	0	0	0	0	0	0	0	0	0	0	0	6
4	Paired-Hab	Darting	F	Noise	0.666667	0	0	0	0	0	0	0	0	0	0	0	2	6	0	0	0	6	0	0	0	0	6	6	0.333333	6	0	6
4	Paired-Hab	Darting	M	Noise	2.66667	6	0	6	0	0	0.333333	0	0	0	0	0	1	0	0	0	6	0	0	6	12	6	0	18	0.333333	6	0	12
4	Paired-Hab	Darting	M	Noise	1	0	0	0	0	0	0	0	0	0	0	0	0.333333	0	0	0	0	0	0	6	12	12	6	6	0	12	12	6
4	Paired-Hab	Darting	M	Noise	0.666667	6	0	0	0	0	0.333333	0	0	0	0	6	0.666667	0	0	0	6	6	0	6	12	6	6	12	0	0	0	0
4	Paired-Hab	Darting	M	Noise	1	0	6	0	0	0	1.33333	0	0	0	0	0	0.666667	0	0	6	0	0	0	6	12	12	6	0	0	6	12	6
4	ShockOnly-NoHab	Darting	F	10s-Hab/PreUS	2	0	0	0	6	0	1.66667	6	0	0	12	0	2.33333	6	0	0	0	0	0	0	6	0	0	0
4	ShockOnly-NoHab	Darting	F	10s-Hab/PreUS	3	6	0	0	0	0	0.333333	0	0	6	0	0	3.33333	0	0	0	0	0	1	0	0	0	0	0
4	ShockOnly-NoHab	Darting	F	10s-Hab/PreUS	1.66667	0	0	0	0	0	0.666667	0	0	0	0	0	2.66667	0	0	0	0	0	0	0	0	0	0	0
4	ShockOnly-NoHab	Darting	F	10s-Hab/PreUS	0	0	0	0	0	0	0.666667	6	0	0	0	0	1.33333	0	0	0	0	0	0	0	0	0	0	0
4	ShockOnly-NoHab	Darting	M	10s-Hab/PreUS	0.666667	0	0	0	0	0	0.333333	0	0	0	6	0	1	0	0	0	0	0	0	0	0	0	0	0
4	ShockOnly-NoHab	Darting	M	10s-Hab/PreUS	0.333333	0	0	0	0	0	1	0	0	0	0	0	0.333333	0	0	0	0	0	0	0	0	0	0	0
4	ShockOnly-NoHab	Darting	M	10s-Hab/PreUS	1	0	0	0	0	0	0.666667	0	0	0	0	0	0.333333	0	0	0	0	0	0	0	0	0	0	0
4	ShockOnly-NoHab	Darting	M	10s-Hab/PreUS	1	0	0	0	0	0	0	0	0	0	0	0	0.333333	0	0	0	0	0	0.666667	0	0	0	0	0
4	ShockOnly-NoHab	Darting	F	Noise																									0	12	6	12
4	ShockOnly-NoHab	Darting	F	Noise																									0.333333	6	6	6
4	ShockOnly-NoHab	Darting	F	Noise																									1	6	12	0
4	ShockOnly-NoHab	Darting	F	Noise																									0	0	0	6
4	ShockOnly-NoHab	Darting	M	Noise																									2.33333	6	6	12
4	ShockOnly-NoHab	Darting	M	Noise																									0	6	0	0
4	ShockOnly-NoHab	Darting	M	Noise																									0	6	6	6
4	ShockOnly-NoHab	Darting	M	Noise																									0	6	6	6
4	ShockOnly-Hab	Darting	F	Noise	3	12	0	6	6	6	0.666667	0	0	0	0	0													0.666667	6	12	0
4	ShockOnly-Hab	Darting	F	Noise	1.33333	0	6	0	0	6	0.666667	0	0	0	0	0													0	0	0	0
4	ShockOnly-Hab	Darting	F	Noise	0.666667	0	0	0	6	0	1	0	0	0	0	6													0	0	0	0
4	ShockOnly-Hab	Darting	F	Noise	1.33333	6	0	6	0	0	0	0	0	0	0	0													0	0	0	0
4	ShockOnly-Hab	Darting	M	Noise	0.333333	0	0	0	0	0	1.33333	0	0	0	0	0													0	0	6	0
4	ShockOnly-Hab	Darting	M	Noise	1.66667	0	0	0	0	0	2	0	0	0	0	0													0	0	0	0
4	ShockOnly-Hab	Darting	M	Noise	0.666667	0	0	0	0	0	2	0	0	0	0	0													0	0	0	6
4	ShockOnly-Hab	Darting	M	Noise	4.66667	12	0	0	0	6	0	0	0	0	0	0													0	12	6	6
4	ShockOnly-Hab	Darting	F	PreUS													3.33333	0	0	0	0	0	0	0	0	0	0	0
4	ShockOnly-Hab	Darting	F	PreUS													0.333333	0	0	0	0	0	0	0	0	0	0	0
4	ShockOnly-Hab	Darting	F	PreUS													1	0	0	0	0	0	0	0	0	0	0	0
4	ShockOnly-Hab	Darting	F	PreUS													1	0	0	0	0	0	0	0	0	0	0	0
4	ShockOnly-Hab	Darting	M	PreUS													1.66667	0	0	0	0	0	1	0	0	0	0	6
4	ShockOnly-Hab	Darting	M	PreUS													1	0	0	0	0	0	0	0	0	0	0	6
4	ShockOnly-Hab	Darting	M	PreUS													1.66667	0	0	0	0	0	0	0	0	0	0	0
4	ShockOnly-Hab	Darting	M	PreUS													3.33333	0	0	0	0	0	0	0	0	0	0	0
