# Supplementary material for: Conditional and unconditional components of aversively motivated freezing, flight and darting in mice
Source: eLife. 2022 May 26;11:e75663. doi: 10.7554/eLife.75663 (PMC9173745; doi:10.7554/eLife.75663)
Supplement: Figure 8—figure supplement 1—source data 2. [file elife-75663-fig8-figsupp1-data2.xlsx]

## Sheet: Day 1
Raw velocity data, extracted via ethovision, which is fed to R source code 1 to detect and extract darts, and to produce velocity traces
Showing Data from Habituation Day 1 for all animals in Experiment 4
Used to calculate Darts/minute as seen in Figure 8-figure supplement 1
Trial	Animal	Group	Sex	TimeStamp	StimPeriod	Distance	Samples	Velocity
Trial 1	M1-2	C-P	M	Start-0:00:00.266	BL	1.28928	7	5.51996
Trial 1	M1-2	C-P	M	0:00:00.266-0:00:00.532	BL	0.750509	8	2.81159
Trial 1	M1-2	C-P	M	0:00:00.532-0:00:00.798	BL	1.5329	8	5.74266
Trial 1	M1-2	C-P	M	0:00:00.798-0:00:01.064	BL	2.55382	8	9.56724
Trial 1	M1-2	C-P	M	0:00:01.064-0:00:01.330	BL	0.944248	8	3.53737
Trial 1	M1-2	C-P	M	0:00:01.330-0:00:01.596	BL	1.33583	8	5.00435
Trial 1	M1-2	C-P	M	0:00:01.596-0:00:01.862	BL	1.19769	8	4.48686
Trial 1	M1-2	C-P	M	0:00:01.862-0:00:02.128	BL	1.05147	8	3.93907
Trial 1	M1-2	C-P	M	0:00:02.128-0:00:02.394	BL	0.205934	8	0.771479
Trial 1	M1-2	C-P	M	0:00:02.394-0:00:02.660	BL	1.45487	8	5.4503
Trial 1	M1-2	C-P	M	0:00:02.660-0:00:02.926	BL	0.632323	8	2.36885
Trial 1	M1-2	C-P	M	0:00:02.926-0:00:03.192	BL	0.222129	8	0.832146
Trial 1	M1-2	C-P	M	0:00:03.192-0:00:03.458	BL	0.119147	8	0.446353
Trial 1	M1-2	C-P	M	0:00:03.458-0:00:03.724	BL	0.0979275	8	0.366862
Trial 1	M1-2	C-P	M	0:00:03.724-0:00:03.990	BL	0.129226	8	0.484112
Trial 1	M1-2	C-P	M	0:00:03.990-0:00:04.256	BL	0.243292	8	0.911436
Trial 1	M1-2	C-P	M	0:00:04.256-0:00:04.522	BL	1.11791	8	4.18797
Trial 1	M1-2	C-P	M	0:00:04.522-0:00:04.788	BL	1.93701	8	7.25651
Trial 1	M1-2	C-P	M	0:00:04.788-0:00:05.054	BL	1.08213	8	4.05396
Trial 1	M1-2	C-P	M	0:00:05.054-0:00:05.320	BL	3.07486	8	11.5192
Trial 1	M1-2	C-P	M	0:00:05.320-0:00:05.586	BL	1.39728	8	5.23452
Trial 1	M1-2	C-P	M	0:00:05.586-0:00:05.852	BL	0.583446	8	2.18574
Trial 1	M1-2	C-P	M	0:00:05.852-0:00:06.118	BL	1.16998	8	4.38303
Trial 1	M1-2	C-P	M	0:00:06.118-0:00:06.384	BL	1.60564	8	6.01512
Trial 1	M1-2	C-P	M	0:00:06.384-0:00:06.650	BL	0.555566	8	2.08129
Trial 1	M1-2	C-P	M	0:00:06.650-0:00:06.916	BL	0.38006	8	1.4238
Trial 1	M1-2	C-P	M	0:00:06.916-0:00:07.182	BL	0.244947	8	0.917632
Trial 1	M1-2	C-P	M	0:00:07.182-0:00:07.448	BL	0.651991	8	2.44251
Trial 1	M1-2	C-P	M	0:00:07.448-0:00:07.714	BL	0.836512	8	3.13379
Trial 1	M1-2	C-P	M	0:00:07.714-0:00:07.980	BL	0.282538	8	1.05846
Trial 1	M1-2	C-P	M	0:00:07.980-0:00:08.246	BL	0.608341	8	2.27901
Trial 1	M1-2	C-P	M	0:00:08.246-0:00:08.512	BL	0.140582	8	0.526656
Trial 1	M1-2	C-P	M	0:00:08.512-0:00:08.778	BL	0.706238	8	2.64574
Trial 1	M1-2	C-P	M	0:00:08.778-0:00:09.044	BL	2.14728	8	8.04424
Trial 1	M1-2	C-P	M	0:00:09.044-0:00:09.310	BL	2.76966	8	10.3758
Trial 1	M1-2	C-P	M	0:00:09.310-0:00:09.576	BL	1.48998	7	6.37924
Trial 1	M1-2	C-P	M	0:00:09.576-0:00:09.842	BL	0.405809	8	1.52026
Trial 1	M1-2	C-P	M	0:00:09.842-0:00:10.108	BL	0.651203	8	2.43957
Trial 1	M1-2	C-P	M	0:00:10.108-0:00:10.374	BL	0.756696	8	2.83476
Trial 1	M1-2	C-P	M	0:00:10.374-0:00:10.640	BL	0.936028	8	3.50661
Trial 1	M1-2	C-P	M	0:00:10.640-0:00:10.906	BL	1.74643	8	6.54256
Trial 1	M1-2	C-P	M	0:00:10.906-0:00:11.172	BL	2.93235	8	10.9853
Trial 1	M1-2	C-P	M	0:00:11.172-0:00:11.438	BL	2.964	8	11.1039
Trial 1	M1-2	C-P	M	0:00:11.438-0:00:11.704	BL	1.2835	8	4.80828
Trial 1	M1-2	C-P	M	0:00:11.704-0:00:11.970	BL	0.753229	8	2.8218
Trial 1	M1-2	C-P	M	0:00:11.970-0:00:12.236	BL	0.683754	8	2.5615
Trial 1	M1-2	C-P	M	0:00:12.236-0:00:12.502	BL	0.595186	8	2.22972
Trial 1	M1-2	C-P	M	0:00:12.502-0:00:12.768	BL	0.304038	8	1.139
Trial 1	M1-2	C-P	M	0:00:12.768-0:00:13.034	BL	0.355203	8	1.33067
Trial 1	M1-2	C-P	M	0:00:13.034-0:00:13.300	BL	0.644707	8	2.41524
Trial 1	M1-2	C-P	M	0:00:13.300-0:00:13.566	BL	1.32182	8	4.9519
Trial 1	M1-2	C-P	M	0:00:13.566-0:00:13.832	BL	1.44411	8	5.41001
Trial 1	M1-2	C-P	M	0:00:13.832-0:00:14.098	BL	2.4719	8	9.2604
Trial 1	M1-2	C-P	M	0:00:14.098-0:00:14.364	BL	1.40437	8	5.26108
Trial 1	M1-2	C-P	M	0:00:14.364-0:00:14.630	BL	1.59305	8	5.968
Trial 1	M1-2	C-P	M	0:00:14.630-0:00:14.896	BL	0.729195	8	2.73173
Trial 1	M1-2	C-P	M	0:00:14.896-0:00:15.162	BL	1.13493	8	4.25172
Trial 1	M1-2	C-P	M	0:00:15.162-0:00:15.428	BL	3.69952	8	13.8594
Trial 1	M1-2	C-P	M	0:00:15.428-0:00:15.694	BL	2.01718	8	7.55682
Trial 1	M1-2	C-P	M	0:00:15.694-0:00:15.960	BL	1.0376	8	3.88712
Trial 1	M1-2	C-P	M	0:00:15.960-0:00:16.226	BL	1.19352	8	4.47121
Trial 1	M1-2	C-P	M	0:00:16.226-0:00:16.492	BL	0.96994	8	3.63364
Trial 1	M1-2	C-P	M	0:00:16.492-0:00:16.758	BL	1.23481	8	4.62591
Trial 1	M1-2	C-P	M	0:00:16.758-0:00:17.024	BL	1.24012	8	4.64578
Trial 1	M1-2	C-P	M	0:00:17.024-0:00:17.290	BL	1.42028	8	5.32072
Trial 1	M1-2	C-P	M	0:00:17.290-0:00:17.556	BL	1.87821	8	7.0362
Trial 1	M1-2	C-P	M	0:00:17.556-0:00:17.822	BL	1.04403	8	3.91118
Trial 1	M1-2	C-P	M	0:00:17.822-0:00:18.088	BL	1.47613	8	5.52993
Trial 1	M1-2	C-P	M	0:00:18.088-0:00:18.354	BL	0.665636	8	2.49364
Trial 1	M1-2	C-P	M	0:00:18.354-0:00:18.620	BL	0.612452	8	2.2944
Trial 1	M1-2	C-P	M	0:00:18.620-0:00:18.886	BL	2.18102	8	8.17063
Trial 1	M1-2	C-P	M	0:00:18.886-0:00:19.152	BL	1.53234	7	6.56059
Trial 1	M1-2	C-P	M	0:00:19.152-0:00:19.418	BL	1.65618	8	6.20444
Trial 1	M1-2	C-P	M	0:00:19.418-0:00:19.684	BL	1.36978	8	5.13154
Trial 1	M1-2	C-P	M	0:00:19.684-0:00:19.950	BL	3.4961	8	13.0973
Trial 1	M1-2	C-P	M	0:00:19.950-0:00:20.216	BL	3.46537	8	12.9821
Trial 1	M1-2	C-P	M	0:00:20.216-0:00:20.482	BL	1.74513	8	6.53766
Trial 1	M1-2	C-P	M	0:00:20.482-0:00:20.748	BL	1.08635	8	4.06975
Trial 1	M1-2	C-P	M	0:00:20.748-0:00:21.014	BL	0.503182	8	1.88504
Trial 1	M1-2	C-P	M	0:00:21.014-0:00:21.280	BL	1.50907	8	5.65336
Trial 1	M1-2	C-P	M	0:00:21.280-0:00:21.546	BL	1.00562	8	3.76728
Trial 1	M1-2	C-P	M	0:00:21.546-0:00:21.812	BL	0.973072	8	3.64535
Trial 1	M1-2	C-P	M	0:00:21.812-0:00:22.078	BL	0.50188	8	1.88018
Trial 1	M1-2	C-P	M	0:00:22.078-0:00:22.344	BL	1.29059	8	4.83484
Trial 1	M1-2	C-P	M	0:00:22.344-0:00:22.610	BL	2.79898	8	10.4857
Trial 1	M1-2	C-P	M	0:00:22.610-0:00:22.876	BL	2.47539	8	9.27346
Trial 1	M1-2	C-P	M	0:00:22.876-0:00:23.142	BL	1.55533	8	5.82661
Trial 1	M1-2	C-P	M	0:00:23.142-0:00:23.408	BL	1.49352	8	5.59515
Trial 1	M1-2	C-P	M	0:00:23.408-0:00:23.674	BL	1.72966	8	6.47973
Trial 1	M1-2	C-P	M	0:00:23.674-0:00:23.940	BL	1.76291	8	6.60429
Trial 1	M1-2	C-P	M	0:00:23.940-0:00:24.206	BL	1.36816	8	5.12545
Trial 1	M1-2	C-P	M	0:00:24.206-0:00:24.472	BL	1.02348	8	3.83421
Trial 1	M1-2	C-P	M	0:00:24.472-0:00:24.738	BL	0.306416	8	1.14792
Trial 1	M1-2	C-P	M	0:00:24.738-0:00:25.004	BL	0.518856	8	1.94376
Trial 1	M1-2	C-P	M	0:00:25.004-0:00:25.270	BL	2.13065	8	7.98196
Trial 1	M1-2	C-P	M	0:00:25.270-0:00:25.536	BL	0.85431	8	3.20046
Trial 1	M1-2	C-P	M	0:00:25.536-0:00:25.802	BL	0.734998	8	2.75347
Trial 1	M1-2	C-P	M	0:00:25.802-0:00:26.068	BL	0.820039	8	3.07208
Trial 1	M1-2	C-P	M	0:00:26.068-0:00:26.334	BL	1.37463	8	5.14969
Trial 1	M1-2	C-P	M	0:00:26.334-0:00:26.600	BL	1.4934	8	5.59468
Trial 1	M1-2	C-P	M	0:00:26.600-0:00:26.866	BL	2.15682	8	8.07993
Trial 1	M1-2	C-P	M	0:00:26.866-0:00:27.132	BL	0.952823	8	3.56952
Trial 1	M1-2	C-P	M	0:00:27.132-0:00:27.398	BL	0.781764	8	2.92868
Trial 1	M1-2	C-P	M	0:00:27.398-0:00:27.664	BL	1.15641	8	4.33223
Trial 1	M1-2	C-P	M	0:00:27.664-0:00:27.930	BL	0.955462	8	3.5794
Trial 1	M1-2	C-P	M	0:00:27.930-0:00:28.196	BL	0.690922	8	2.58836
Trial 1	M1-2	C-P	M	0:00:28.196-0:00:28.462	BL	0.585208	8	2.19233
Trial 1	M1-2	C-P	M	0:00:28.462-0:00:28.728	BL	1.06551	7	4.56188
Trial 1	M1-2	C-P	M	0:00:28.728-0:00:28.994	BL	1.10386	8	4.13535
Trial 1	M1-2	C-P	M	0:00:28.994-0:00:29.260	BL	0.783393	8	2.93478
Trial 1	M1-2	C-P	M	0:00:29.260-0:00:29.526	BL	0.801515	8	3.00268
Trial 1	M1-2	C-P	M	0:00:29.526-0:00:29.792	BL	1.11371	8	4.17227
Trial 1	M1-2	C-P	M	0:00:29.792-0:00:30.058	BL	3.33597	8	12.4974
Trial 1	M1-2	C-P	M	0:00:30.058-0:00:30.324	BL	2.14246	8	8.02626
Trial 1	M1-2	C-P	M	0:00:30.324-0:00:30.590	BL	2.7809	8	10.4179
Trial 1	M1-2	C-P	M	0:00:30.590-0:00:30.856	BL	0.883902	8	3.31133
Trial 1	M1-2	C-P	M	0:00:30.856-0:00:31.122	BL	0.458043	8	1.71595
Trial 1	M1-2	C-P	M	0:00:31.122-0:00:31.388	BL	0.484808	8	1.8162
Trial 1	M1-2	C-P	M	0:00:31.388-0:00:31.654	BL	0.407739	8	1.52749
Trial 1	M1-2	C-P	M	0:00:31.654-0:00:31.920	BL	0.41194	8	1.54324
Trial 1	M1-2	C-P	M	0:00:31.920-0:00:32.186	BL	0.626257	8	2.34612
Trial 1	M1-2	C-P	M	0:00:32.186-0:00:32.452	BL	0.767102	8	2.87375
Trial 1	M1-2	C-P	M	0:00:32.452-0:00:32.718	BL	0.473833	8	1.77509
Trial 1	M1-2	C-P	M	0:00:32.718-0:00:32.984	BL	1.2256	8	4.5914
Trial 1	M1-2	C-P	M	0:00:32.984-0:00:33.250	BL	1.03512	8	3.87779
Trial 1	M1-2	C-P	M	0:00:33.250-0:00:33.516	BL	2.45424	8	9.19422
Trial 1	M1-2	C-P	M	0:00:33.516-0:00:33.782	BL	1.96169	8	7.34897
Trial 1	M1-2	C-P	M	0:00:33.782-0:00:34.048	BL	1.74026	8	6.51946
Trial 1	M1-2	C-P	M	0:00:34.048-0:00:34.314	BL	1.11261	8	4.16811
Trial 1	M1-2	C-P	M	0:00:34.314-0:00:34.580	BL	0.897503	8	3.36225
Trial 1	M1-2	C-P	M	0:00:34.580-0:00:34.846	BL	0.83498	8	3.12805
Trial 1	M1-2	C-P	M	0:00:34.846-0:00:35.112	BL	1.00957	8	3.78208
Trial 1	M1-2	C-P	M	0:00:35.112-0:00:35.378	BL	0.457319	8	1.71324
Trial 1	M1-2	C-P	M	0:00:35.378-0:00:35.644	BL	0.984735	8	3.68904
Trial 1	M1-2	C-P	M	0:00:35.644-0:00:35.910	BL	0.898225	8	3.36497
Trial 1	M1-2	C-P	M	0:00:35.910-0:00:36.176	BL	0.812932	8	3.04545
Trial 1	M1-2	C-P	M	0:00:36.176-0:00:36.442	BL	1.57336	8	5.89417
Trial 1	M1-2	C-P	M	0:00:36.442-0:00:36.708	BL	1.43475	8	5.3749
Trial 1	M1-2	C-P	M	0:00:36.708-0:00:36.974	BL	0.903628	8	3.38521
Trial 1	M1-2	C-P	M	0:00:36.974-0:00:37.240	BL	2.96264	8	11.0988
Trial 1	M1-2	C-P	M	0:00:37.240-0:00:37.506	BL	0.740657	8	2.7747
Trial 1	M1-2	C-P	M	0:00:37.506-0:00:37.772	BL	0.955558	8	3.57974
Trial 1	M1-2	C-P	M	0:00:37.772-0:00:38.038	BL	0.995925	7	4.26397
Trial 1	M1-2	C-P	M	0:00:38.038-0:00:38.304	BL	1.17348	8	4.39622
Trial 1	M1-2	C-P	M	0:00:38.304-0:00:38.570	BL	1.41603	8	5.30482
Trial 1	M1-2	C-P	M	0:00:38.570-0:00:38.836	BL	3.7226	8	13.9457
Trial 1	M1-2	C-P	M	0:00:38.836-0:00:39.102	BL	2.63083	8	9.85575
Trial 1	M1-2	C-P	M	0:00:39.102-0:00:39.368	BL	1.29029	8	4.83374
Trial 1	M1-2	C-P	M	0:00:39.368-0:00:39.634	BL	0.853456	8	3.19726
Trial 1	M1-2	C-P	M	0:00:39.634-0:00:39.900	BL	0.790021	8	2.95961
Trial 1	M1-2	C-P	M	0:00:39.900-0:00:40.166	BL	0.531033	8	1.98937
Trial 1	M1-2	C-P	M	0:00:40.166-0:00:40.432	BL	0.5069	8	1.89897
Trial 1	M1-2	C-P	M	0:00:40.432-0:00:40.698	BL	0.490276	8	1.83669
Trial 1	M1-2	C-P	M	0:00:40.698-0:00:40.964	BL	1.1219	8	4.20293
Trial 1	M1-2	C-P	M	0:00:40.964-0:00:41.230	BL	1.00167	8	3.75248
Trial 1	M1-2	C-P	M	0:00:41.230-0:00:41.496	BL	0.995078	8	3.72781
Trial 1	M1-2	C-P	M	0:00:41.496-0:00:41.762	BL	1.42875	8	5.35246
Trial 1	M1-2	C-P	M	0:00:41.762-0:00:42.028	BL	2.37067	8	8.88115
Trial 1	M1-2	C-P	M	0:00:42.028-0:00:42.294	BL	1.05781	8	3.96285
Trial 1	M1-2	C-P	M	0:00:42.294-0:00:42.560	BL	3.9805	8	14.9119
Trial 1	M1-2	C-P	M	0:00:42.560-0:00:42.826	BL	3.33392	8	12.4897
Trial 1	M1-2	C-P	M	0:00:42.826-0:00:43.092	BL	3.46147	8	12.9676
Trial 1	M1-2	C-P	M	0:00:43.092-0:00:43.358	BL	3.31882	8	12.4331
Trial 1	M1-2	C-P	M	0:00:43.358-0:00:43.624	BL	1.42957	8	5.35557
Trial 1	M1-2	C-P	M	0:00:43.624-0:00:43.890	BL	1.68813	8	6.32416
Trial 1	M1-2	C-P	M	0:00:43.890-0:00:44.156	BL	1.16046	8	4.34736
Trial 1	M1-2	C-P	M	0:00:44.156-0:00:44.422	BL	1.23478	8	4.62581
Trial 1	M1-2	C-P	M	0:00:44.422-0:00:44.688	BL	1.48336	8	5.55704
Trial 1	M1-2	C-P	M	0:00:44.688-0:00:44.954	BL	1.36036	8	5.09623
Trial 1	M1-2	C-P	M	0:00:44.954-0:00:45.220	BL	0.75248	8	2.81897
Trial 1	M1-2	C-P	M	0:00:45.220-0:00:45.486	BL	1.24867	8	4.67781
Trial 1	M1-2	C-P	M	0:00:45.486-0:00:45.752	BL	0.97358	8	3.64727
Trial 1	M1-2	C-P	M	0:00:45.752-0:00:46.018	BL	0.879076	8	3.29323
Trial 1	M1-2	C-P	M	0:00:46.018-0:00:46.284	BL	0.362708	8	1.3588
Trial 1	M1-2	C-P	M	0:00:46.284-0:00:46.550	BL	0.701465	8	2.62785
Trial 1	M1-2	C-P	M	0:00:46.550-0:00:46.816	BL	2.57568	8	9.64911
Trial 1	M1-2	C-P	M	0:00:46.816-0:00:47.082	BL	4.63161	8	17.3511
Trial 1	M1-2	C-P	M	0:00:47.082-0:00:47.348	BL	2.95507	8	11.0704
Trial 1	M1-2	C-P	M	0:00:47.348-0:00:47.614	BL	1.7421	7	7.45865
Trial 1	M1-2	C-P	M	0:00:47.614-0:00:47.880	BL	1.44152	8	5.40029
Trial 1	M1-2	C-P	M	0:00:47.880-0:00:48.146	BL	1.27557	8	4.77857
Trial 1	M1-2	C-P	M	0:00:48.146-0:00:48.412	BL	0.865901	8	3.24387
Trial 1	M1-2	C-P	M	0:00:48.412-0:00:48.678	BL	2.71176	8	10.159
Trial 1	M1-2	C-P	M	0:00:48.678-0:00:48.944	BL	1.18435	8	4.43687
Trial 1	M1-2	C-P	M	0:00:48.944-0:00:49.210	BL	0.890174	8	3.33483
Trial 1	M1-2	C-P	M	0:00:49.210-0:00:49.476	BL	2.50658	8	9.39028
Trial 1	M1-2	C-P	M	0:00:49.476-0:00:49.742	BL	2.38148	8	8.92161
Trial 1	M1-2	C-P	M	0:00:49.742-0:00:50.008	BL	1.10526	8	4.14059
Trial 1	M1-2	C-P	M	0:00:50.008-0:00:50.274	BL	2.42814	8	9.09641
Trial 1	M1-2	C-P	M	0:00:50.274-0:00:50.540	BL	4.26188	8	15.9661
Trial 1	M1-2	C-P	M	0:00:50.540-0:00:50.806	BL	2.9529	8	11.0623
Trial 1	M1-2	C-P	M	0:00:50.806-0:00:51.072	BL	1.49755	8	5.6102
Trial 1	M1-2	C-P	M	0:00:51.072-0:00:51.338	BL	1.11742	8	4.18613
Trial 1	M1-2	C-P	M	0:00:51.338-0:00:51.604	BL	1.4671	8	5.4961
Trial 1	M1-2	C-P	M	0:00:51.604-0:00:51.870	BL	2.53759	8	9.50648
Trial 1	M1-2	C-P	M	0:00:51.870-0:00:52.136	BL	1.62816	8	6.09947
Trial 1	M1-2	C-P	M	0:00:52.136-0:00:52.402	BL	1.28793	8	4.82493
Trial 1	M1-2	C-P	M	0:00:52.402-0:00:52.668	BL	3.00112	8	11.243
Trial 1	M1-2	C-P	M	0:00:52.668-0:00:52.934	BL	2.04222	8	7.65066
Trial 1	M1-2	C-P	M	0:00:52.934-0:00:53.200	BL	1.59347	8	5.96955
Trial 1	M1-2	C-P	M	0:00:53.200-0:00:53.466	BL	2.54941	8	9.5507
Trial 1	M1-2	C-P	M	0:00:53.466-0:00:53.732	BL	1.34505	8	5.03888
Trial 1	M1-2	C-P	M	0:00:53.732-0:00:53.998	BL	1.22073	8	4.57317
Trial 1	M1-2	C-P	M	0:00:53.998-0:00:54.264	BL	2.03218	8	7.61303
Trial 1	M1-2	C-P	M	0:00:54.264-0:00:54.530	BL	1.72852	8	6.47549
Trial 1	M1-2	C-P	M	0:00:54.530-0:00:54.796	BL	0.865952	8	3.24406
Trial 1	M1-2	C-P	M	0:00:54.796-0:00:55.062	BL	1.46586	8	5.49143
Trial 1	M1-2	C-P	M	0:00:55.062-0:00:55.328	BL	2.09237	8	7.8386
Trial 1	M1-2	C-P	M	0:00:55.328-0:00:55.594	BL	2.16256	8	8.10144
Trial 1	M1-2	C-P	M	0:00:55.594-0:00:55.860	BL	2.18919	8	8.20126
Trial 1	M1-2	C-P	M	0:00:55.860-0:00:56.126	BL	1.30966	8	4.90634
Trial 1	M1-2	C-P	M	0:00:56.126-0:00:56.392	BL	1.41131	8	5.28709
Trial 1	M1-2	C-P	M	0:00:56.392-0:00:56.658	BL	2.19815	8	8.23486
Trial 1	M1-2	C-P	M	0:00:56.658-0:00:56.924	BL	2.6936	8	10.0909
Trial 1	M1-2	C-P	M	0:00:56.924-0:00:57.190	BL	2.77009	7	11.86
Trial 1	M1-2	C-P	M	0:00:57.190-0:00:57.456	BL	0.782648	8	2.93199
Trial 1	M1-2	C-P	M	0:00:57.456-0:00:57.722	BL	0.504269	8	1.88911
Trial 1	M1-2	C-P	M	0:00:57.722-0:00:57.988	BL	0.561147	8	2.10219
Trial 1	M1-2	C-P	M	0:00:57.988-0:00:58.254	BL	0.366814	8	1.37417
Trial 1	M1-2	C-P	M	0:00:58.254-0:00:58.520	BL	0.584007	8	2.18784
Trial 1	M1-2	C-P	M	0:00:58.520-0:00:58.786	BL	3.57218	8	13.3823
Trial 1	M1-2	C-P	M	0:00:58.786-0:00:59.052	BL	2.22447	8	8.33342
Trial 1	M1-2	C-P	M	0:00:59.052-0:00:59.318	BL	1.05469	8	3.95117
Trial 1	M1-2	C-P	M	0:00:59.318-0:00:59.584	BL	0.535831	8	2.00736
Trial 1	M1-2	C-P	M	0:00:59.584-0:00:59.850	BL	0.984646	8	3.68874
Trial 1	M1-2	C-P	M	0:00:59.850-0:01:00.116	BL	0.71826	8	2.69078
Trial 1	M1-2	C-P	M	0:01:00.116-0:01:00.382	BL	0.340841	8	1.27688
Trial 1	M1-2	C-P	M	0:01:00.382-0:01:00.648	BL	0.778332	8	2.91583
Trial 1	M1-2	C-P	M	0:01:00.648-0:01:00.914	BL	0.875775	8	3.28086
Trial 1	M1-2	C-P	M	0:01:00.914-0:01:01.180	BL	0.199697	8	0.748112
Trial 1	M1-2	C-P	M	0:01:01.180-0:01:01.446	BL	0.407787	8	1.52767
Trial 1	M1-2	C-P	M	0:01:01.446-0:01:01.712	BL	1.21526	8	4.55266
Trial 1	M1-2	C-P	M	0:01:01.712-0:01:01.978	BL	1.73222	8	6.48933
Trial 1	M1-2	C-P	M	0:01:01.978-0:01:02.244	BL	3.43673	8	12.8748
Trial 1	M1-2	C-P	M	0:01:02.244-0:01:02.510	BL	2.83436	8	10.6182
Trial 1	M1-2	C-P	M	0:01:02.510-0:01:02.776	BL	2.89078	8	10.8296
Trial 1	M1-2	C-P	M	0:01:02.776-0:01:03.042	BL	2.89871	8	10.8593
Trial 1	M1-2	C-P	M	0:01:03.042-0:01:03.308	BL	0.632995	8	2.37136
Trial 1	M1-2	C-P	M	0:01:03.308-0:01:03.574	BL	1.27654	8	4.78222
Trial 1	M1-2	C-P	M	0:01:03.574-0:01:03.840	BL	1.98109	8	7.42165
Trial 1	M1-2	C-P	M	0:01:03.840-0:01:04.106	BL	1.30499	8	4.88883
Trial 1	M1-2	C-P	M	0:01:04.106-0:01:04.372	BL	1.80822	8	6.77403
Trial 1	M1-2	C-P	M	0:01:04.372-0:01:04.638	BL	1.86695	8	6.9941
Trial 1	M1-2	C-P	M	0:01:04.638-0:01:04.904	BL	3.65907	8	13.7077
Trial 1	M1-2	C-P	M	0:01:04.904-0:01:05.170	BL	1.82402	8	6.83324
Trial 1	M1-2	C-P	M	0:01:05.170-0:01:05.436	BL	0.996322	8	3.73247
Trial 1	M1-2	C-P	M	0:01:05.436-0:01:05.702	BL	0.938524	8	3.51594
Trial 1	M1-2	C-P	M	0:01:05.702-0:01:05.968	BL	2.47117	8	9.25762
Trial 1	M1-2	C-P	M	0:01:05.968-0:01:06.234	BL	0.857856	8	3.21374
Trial 1	M1-2	C-P	M	0:01:06.234-0:01:06.500	BL	0.694815	8	2.60294
Trial 1	M1-2	C-P	M	0:01:06.500-0:01:06.766	BL	0.590308	7	2.52735
Trial 1	M1-2	C-P	M	0:01:06.766-0:01:07.032	BL	0.497101	8	1.86226
Trial 1	M1-2	C-P	M	0:01:07.032-0:01:07.298	BL	0.756681	8	2.83472
Trial 1	M1-2	C-P	M	0:01:07.298-0:01:07.564	BL	0.651156	8	2.43939
Trial 1	M1-2	C-P	M	0:01:07.564-0:01:07.830	BL	0.442064	8	1.65608
Trial 1	M1-2	C-P	M	0:01:07.830-0:01:08.096	BL	0.902897	8	3.38247
Trial 1	M1-2	C-P	M	0:01:08.096-0:01:08.362	BL	1.30456	8	4.88721
Trial 1	M1-2	C-P	M	0:01:08.362-0:01:08.628	BL	1.23361	8	4.62142
Trial 1	M1-2	C-P	M	0:01:08.628-0:01:08.894	BL	0.829309	8	3.10681
Trial 1	M1-2	C-P	M	0:01:08.894-0:01:09.160	BL	1.60673	8	6.01923
Trial 1	M1-2	C-P	M	0:01:09.160-0:01:09.426	BL	0.773857	8	2.89906
Trial 1	M1-2	C-P	M	0:01:09.426-0:01:09.692	BL	0.641388	8	2.40281
Trial 1	M1-2	C-P	M	0:01:09.692-0:01:09.958	BL	1.52997	8	5.73165
Trial 1	M1-2	C-P	M	0:01:09.958-0:01:10.224	BL	1.64944	8	6.17924
Trial 1	M1-2	C-P	M	0:01:10.224-0:01:10.490	BL	1.6808	8	6.29667
Trial 1	M1-2	C-P	M	0:01:10.490-0:01:10.756	BL	1.86307	8	6.9795
Trial 1	M1-2	C-P	M	0:01:10.756-0:01:11.022	BL	1.8472	8	6.92014
Trial 1	M1-2	C-P	M	0:01:11.022-0:01:11.288	BL	1.11838	8	4.1897
Trial 1	M1-2	C-P	M	0:01:11.288-0:01:11.554	BL	1.1168	8	4.18379
Trial 1	M1-2	C-P	M	0:01:11.554-0:01:11.820	BL	1.66177	8	6.22538
Trial 1	M1-2	C-P	M	0:01:11.820-0:01:12.086	BL	2.55891	8	9.58626
Trial 1	M1-2	C-P	M	0:01:12.086-0:01:12.352	BL	0.905804	8	3.39338
Trial 1	M1-2	C-P	M	0:01:12.352-0:01:12.618	BL	1.11755	8	4.18662
Trial 1	M1-2	C-P	M	0:01:12.618-0:01:12.884	BL	1.64207	8	6.15159
Trial 1	M1-2	C-P	M	0:01:12.884-0:01:13.150	BL	0.880369	8	3.29808
Trial 1	M1-2	C-P	M	0:01:13.150-0:01:13.416	BL	0.565509	8	2.11853
Trial 1	M1-2	C-P	M	0:01:13.416-0:01:13.682	BL	0.95685	8	3.58459
Trial 1	M1-2	C-P	M	0:01:13.682-0:01:13.948	BL	1.40123	8	5.24934
Trial 1	M1-2	C-P	M	0:01:13.948-0:01:14.214	BL	1.10462	8	4.13821
Trial 1	M1-2	C-P	M	0:01:14.214-0:01:14.480	BL	2.47109	8	9.25732
Trial 1	M1-2	C-P	M	0:01:14.480-0:01:14.746	BL	4.34936	8	16.2938
Trial 1	M1-2	C-P	M	0:01:14.746-0:01:15.012	BL	2.66282	8	9.97558
Trial 1	M1-2	C-P	M	0:01:15.012-0:01:15.278	BL	1.00417	8	3.76185
Trial 1	M1-2	C-P	M	0:01:15.278-0:01:15.544	BL	1.23017	8	4.60854
Trial 1	M1-2	C-P	M	0:01:15.544-0:01:15.810	BL	1.33752	8	5.01069
Trial 1	M1-2	C-P	M	0:01:15.810-0:01:16.076	BL	1.68543	7	7.21608
Trial 1	M1-2	C-P	M	0:01:16.076-0:01:16.342	BL	0.666242	8	2.49591
Trial 1	M1-2	C-P	M	0:01:16.342-0:01:16.608	BL	0.982951	8	3.68237
Trial 1	M1-2	C-P	M	0:01:16.608-0:01:16.874	BL	0.725074	8	2.7163
Trial 1	M1-2	C-P	M	0:01:16.874-0:01:17.140	BL	1.60261	8	6.00382
Trial 1	M1-2	C-P	M	0:01:17.140-0:01:17.406	BL	2.93001	8	10.9765
Trial 1	M1-2	C-P	M	0:01:17.406-0:01:17.672	BL	3.32965	8	12.4737
Trial 1	M1-2	C-P	M	0:01:17.672-0:01:17.938	BL	2.9065	8	10.8884
Trial 1	M1-2	C-P	M	0:01:17.938-0:01:18.204	BL	0.912735	8	3.41933
Trial 1	M1-2	C-P	M	0:01:18.204-0:01:18.470	BL	0.991389	8	3.71399
Trial 1	M1-2	C-P	M	0:01:18.470-0:01:18.736	BL	1.43219	8	5.36529
Trial 1	M1-2	C-P	M	0:01:18.736-0:01:19.002	BL	0.755077	8	2.82872
Trial 1	M1-2	C-P	M	0:01:19.002-0:01:19.268	BL	0.482181	8	1.80637
Trial 1	M1-2	C-P	M	0:01:19.268-0:01:19.534	BL	1.84443	8	6.90968
Trial 1	M1-2	C-P	M	0:01:19.534-0:01:19.800	BL	0.885182	8	3.31612
Trial 1	M1-2	C-P	M	0:01:19.800-0:01:20.066	BL	1.04775	8	3.92514
Trial 1	M1-2	C-P	M	0:01:20.066-0:01:20.332	BL	0.345207	8	1.29323
Trial 1	M1-2	C-P	M	0:01:20.332-0:01:20.598	BL	0.351085	8	1.31525
Trial 1	M1-2	C-P	M	0:01:20.598-0:01:20.864	BL	0.414452	8	1.55264
Trial 1	M1-2	C-P	M	0:01:20.864-0:01:21.130	BL	0.585105	8	2.19195
Trial 1	M1-2	C-P	M	0:01:21.130-0:01:21.396	BL	0.386852	8	1.44924
Trial 1	M1-2	C-P	M	0:01:21.396-0:01:21.662	BL	0.978963	8	3.66744
Trial 1	M1-2	C-P	M	0:01:21.662-0:01:21.928	BL	0.659808	8	2.4718
Trial 1	M1-2	C-P	M	0:01:21.928-0:01:22.194	BL	0.854055	8	3.19948
Trial 1	M1-2	C-P	M	0:01:22.194-0:01:22.460	BL	2.0805	8	7.79406
Trial 1	M1-2	C-P	M	0:01:22.460-0:01:22.726	BL	0.833811	8	3.12365
Trial 1	M1-2	C-P	M	0:01:22.726-0:01:22.992	BL	0.904959	8	3.39019
Trial 1	M1-2	C-P	M	0:01:22.992-0:01:23.258	BL	0.224099	8	0.83953
Trial 1	M1-2	C-P	M	0:01:23.258-0:01:23.524	BL	0.504036	8	1.88825
Trial 1	M1-2	C-P	M	0:01:23.524-0:01:23.790	BL	0.288343	8	1.08022
Trial 1	M1-2	C-P	M	0:01:23.790-0:01:24.056	BL	0.319339	8	1.19632
Trial 1	M1-2	C-P	M	0:01:24.056-0:01:24.322	BL	1.28311	8	4.80685
Trial 1	M1-2	C-P	M	0:01:24.322-0:01:24.588	BL	1.00761	8	3.77477
Trial 1	M1-2	C-P	M	0:01:24.588-0:01:24.854	BL	0.670214	8	2.51079
Trial 1	M1-2	C-P	M	0:01:24.854-0:01:25.120	BL	0.203833	8	0.76361
Trial 1	M1-2	C-P	M	0:01:25.120-0:01:25.386	BL	1.22665	8	4.59531
Trial 1	M1-2	C-P	M	0:01:25.386-0:01:25.652	BL	0.803466	7	3.43999
Trial 1	M1-2	C-P	M	0:01:25.652-0:01:25.918	BL	2.06994	8	7.75455
Trial 1	M1-2	C-P	M	0:01:25.918-0:01:26.184	BL	0.735094	8	2.75384
Trial 1	M1-2	C-P	M	0:01:26.184-0:01:26.450	BL	1.0045	8	3.76311
Trial 1	M1-2	C-P	M	0:01:26.450-0:01:26.716	BL	0.67769	8	2.53879
Trial 1	M1-2	C-P	M	0:01:26.716-0:01:26.982	BL	2.64223	8	9.89844
Trial 1	M1-2	C-P	M	0:01:26.982-0:01:27.248	BL	2.40617	8	9.01409
Trial 1	M1-2	C-P	M	0:01:27.248-0:01:27.514	BL	3.14545	8	11.7836
Trial 1	M1-2	C-P	M	0:01:27.514-0:01:27.780	BL	0.929864	8	3.48348
Trial 1	M1-2	C-P	M	0:01:27.780-0:01:28.046	BL	1.82815	8	6.84872
Trial 1	M1-2	C-P	M	0:01:28.046-0:01:28.312	BL	1.48956	8	5.58026
Trial 1	M1-2	C-P	M	0:01:28.312-0:01:28.578	BL	0.666948	8	2.49858
Trial 1	M1-2	C-P	M	0:01:28.578-0:01:28.844	BL	2.50714	8	9.39235
Trial 1	M1-2	C-P	M	0:01:28.844-0:01:29.110	BL	2.03275	8	7.61516
Trial 1	M1-2	C-P	M	0:01:29.110-0:01:29.376	BL	1.68093	8	6.29721
Trial 1	M1-2	C-P	M	0:01:29.376-0:01:29.642	BL	1.81217	8	6.78882
Trial 1	M1-2	C-P	M	0:01:29.642-0:01:29.908	BL	4.41354	8	16.5344
Trial 1	M1-2	C-P	M	0:01:29.908-0:01:30.174	BL	1.52699	8	5.72054
Trial 1	M1-2	C-P	M	0:01:30.174-0:01:30.440	BL	2.54964	8	9.55156
Trial 1	M1-2	C-P	M	0:01:30.440-0:01:30.706	BL	0.622183	8	2.33085
Trial 1	M1-2	C-P	M	0:01:30.706-0:01:30.972	BL	1.71587	8	6.42806
Trial 1	M1-2	C-P	M	0:01:30.972-0:01:31.238	BL	1.13867	8	4.26574
Trial 1	M1-2	C-P	M	0:01:31.238-0:01:31.504	BL	0.342206	8	1.28199
Trial 1	M1-2	C-P	M	0:01:31.504-0:01:31.770	BL	0.681731	8	2.55393
Trial 1	M1-2	C-P	M	0:01:31.770-0:01:32.036	BL	1.04731	8	3.9235
Trial 1	M1-2	C-P	M	0:01:32.036-0:01:32.302	BL	1.02137	8	3.82629
Trial 1	M1-2	C-P	M	0:01:32.302-0:01:32.568	BL	0.793147	8	2.97133
Trial 1	M1-2	C-P	M	0:01:32.568-0:01:32.834	BL	0.708197	8	2.65308
Trial 1	M1-2	C-P	M	0:01:32.834-0:01:33.100	BL	0.697637	8	2.61351
Trial 1	M1-2	C-P	M	0:01:33.100-0:01:33.366	BL	0.994689	8	3.72637
Trial 1	M1-2	C-P	M	0:01:33.366-0:01:33.632	BL	1.88558	8	7.06385
Trial 1	M1-2	C-P	M	0:01:33.632-0:01:33.898	BL	1.80283	8	6.75384
Trial 1	M1-2	C-P	M	0:01:33.898-0:01:34.164	BL	1.0337	8	3.87253
Trial 1	M1-2	C-P	M	0:01:34.164-0:01:34.430	BL	1.39644	8	5.23141
Trial 1	M1-2	C-P	M	0:01:34.430-0:01:34.696	BL	0.804117	8	3.01243
Trial 1	M1-2	C-P	M	0:01:34.696-0:01:34.962	BL	2.69849	8	10.1092
Trial 1	M1-2	C-P	M	0:01:34.962-0:01:35.228	BL	1.17607	7	5.03528
Trial 1	M1-2	C-P	M	0:01:35.228-0:01:35.494	BL	0.658349	8	2.46635
Trial 1	M1-2	C-P	M	0:01:35.494-0:01:35.760	BL	1.33683	8	5.00812
Trial 1	M1-2	C-P	M	0:01:35.760-0:01:36.026	BL	1.19848	8	4.4898
Trial 1	M1-2	C-P	M	0:01:36.026-0:01:36.292	BL	1.59672	8	5.98169
Trial 1	M1-2	C-P	M	0:01:36.292-0:01:36.558	BL	0.734296	8	2.75084
Trial 1	M1-2	C-P	M	0:01:36.558-0:01:36.824	BL	1.03293	8	3.86962
Trial 1	M1-2	C-P	M	0:01:36.824-0:01:37.090	BL	0.711505	8	2.66547
Trial 1	M1-2	C-P	M	0:01:37.090-0:01:37.356	BL	1.15824	8	4.33906
Trial 1	M1-2	C-P	M	0:01:37.356-0:01:37.622	BL	0.728764	8	2.73014
Trial 1	M1-2	C-P	M	0:01:37.622-0:01:37.888	BL	0.424163	8	1.58902
Trial 1	M1-2	C-P	M	0:01:37.888-0:01:38.154	BL	0.382336	8	1.43233
Trial 1	M1-2	C-P	M	0:01:38.154-0:01:38.420	BL	0.300157	8	1.12446
Trial 1	M1-2	C-P	M	0:01:38.420-0:01:38.686	BL	0.207736	8	0.778234
Trial 1	M1-2	C-P	M	0:01:38.686-0:01:38.952	BL	0.184604	8	0.691573
Trial 1	M1-2	C-P	M	0:01:38.952-0:01:39.218	BL	0.90378	8	3.38577
Trial 1	M1-2	C-P	M	0:01:39.218-0:01:39.484	BL	0.832588	8	3.11911
Trial 1	M1-2	C-P	M	0:01:39.484-0:01:39.750	BL	1.99927	8	7.48976
Trial 1	M1-2	C-P	M	0:01:39.750-0:01:40.016	BL	0.76794	8	2.87689
Trial 1	M1-2	C-P	M	0:01:40.016-0:01:40.282	BL	0.629803	8	2.3594
Trial 1	M1-2	C-P	M	0:01:40.282-0:01:40.548	BL	0.414236	8	1.55183
Trial 1	M1-2	C-P	M	0:01:40.548-0:01:40.814	BL	0.858662	8	3.21676
Trial 1	M1-2	C-P	M	0:01:40.814-0:01:41.080	BL	1.07621	8	4.03176
Trial 1	M1-2	C-P	M	0:01:41.080-0:01:41.346	BL	1.69752	8	6.35936
Trial 1	M1-2	C-P	M	0:01:41.346-0:01:41.612	BL	3.45542	8	12.9449
Trial 1	M1-2	C-P	M	0:01:41.612-0:01:41.878	BL	3.65467	8	13.6913
Trial 1	M1-2	C-P	M	0:01:41.878-0:01:42.144	BL	0.855607	8	3.20533
Trial 1	M1-2	C-P	M	0:01:42.144-0:01:42.410	BL	2.59203	8	9.71037
Trial 1	M1-2	C-P	M	0:01:42.410-0:01:42.676	BL	0.960797	8	3.59939
Trial 1	M1-2	C-P	M	0:01:42.676-0:01:42.942	BL	0.795464	8	2.98
Trial 1	M1-2	C-P	M	0:01:42.942-0:01:43.208	BL	1.33316	8	4.99433
Trial 1	M1-2	C-P	M	0:01:43.208-0:01:43.474	BL	0.729203	8	2.73179
Trial 1	M1-2	C-P	M	0:01:43.474-0:01:43.740	BL	1.72291	8	6.45446
Trial 1	M1-2	C-P	M	0:01:43.740-0:01:44.006	BL	2.20441	8	8.2583
Trial 1	M1-2	C-P	M	0:01:44.006-0:01:44.272	BL	0.547703	8	2.05182
Trial 1	M1-2	C-P	M	0:01:44.272-0:01:44.538	BL	0.579802	8	2.17208
Trial 1	M1-2	C-P	M	0:01:44.538-0:01:44.804	BL	1.21946	7	5.22101
Trial 1	M1-2	C-P	M	0:01:44.804-0:01:45.070	BL	1.52689	8	5.72012
Trial 1	M1-2	C-P	M	0:01:45.070-0:01:45.336	BL	0.887048	8	3.3231
Trial 1	M1-2	C-P	M	0:01:45.336-0:01:45.602	BL	1.42453	8	5.3367
Trial 1	M1-2	C-P	M	0:01:45.602-0:01:45.868	BL	0.844383	8	3.16327
Trial 1	M1-2	C-P	M	0:01:45.868-0:01:46.134	BL	2.34708	8	8.79274
Trial 1	M1-2	C-P	M	0:01:46.134-0:01:46.400	BL	1.86431	8	6.98414
Trial 1	M1-2	C-P	M	0:01:46.400-0:01:46.666	BL	3.39559	8	12.7206
Trial 1	M1-2	C-P	M	0:01:46.666-0:01:46.932	BL	1.56665	8	5.86906
Trial 1	M1-2	C-P	M	0:01:46.932-0:01:47.198	BL	1.64688	8	6.16962
Trial 1	M1-2	C-P	M	0:01:47.198-0:01:47.464	BL	1.36587	8	5.1169
Trial 1	M1-2	C-P	M	0:01:47.464-0:01:47.730	BL	0.295032	8	1.10527
Trial 1	M1-2	C-P	M	0:01:47.730-0:01:47.996	BL	0.75639	8	2.83362
Trial 1	M1-2	C-P	M	0:01:47.996-0:01:48.262	BL	1.15766	8	4.33688
Trial 1	M1-2	C-P	M	0:01:48.262-0:01:48.528	BL	1.18871	8	4.45321
Trial 1	M1-2	C-P	M	0:01:48.528-0:01:48.794	BL	2.75757	8	10.3306
Trial 1	M1-2	C-P	M	0:01:48.794-0:01:49.060	BL	1.13971	8	4.26966
Trial 1	M1-2	C-P	M	0:01:49.060-0:01:49.326	BL	4.25219	8	15.9298
Trial 1	M1-2	C-P	M	0:01:49.326-0:01:49.592	BL	0.930278	8	3.48506
Trial 1	M1-2	C-P	M	0:01:49.592-0:01:49.858	BL	1.22437	8	4.58678
Trial 1	M1-2	C-P	M	0:01:49.858-0:01:50.124	BL	0.47692	8	1.78666
Trial 1	M1-2	C-P	M	0:01:50.124-0:01:50.390	BL	1.50359	8	5.63286
Trial 1	M1-2	C-P	M	0:01:50.390-0:01:50.656	BL	0.811716	8	3.04088
Trial 1	M1-2	C-P	M	0:01:50.656-0:01:50.922	BL	0.923899	8	3.46116
Trial 1	M1-2	C-P	M	0:01:50.922-0:01:51.188	BL	1.61338	8	6.04407
Trial 1	M1-2	C-P	M	0:01:51.188-0:01:51.454	BL	2.44772	8	9.16976
Trial 1	M1-2	C-P	M	0:01:51.454-0:01:51.720	BL	1.90947	8	7.15337
Trial 1	M1-2	C-P	M	0:01:51.720-0:01:51.986	BL	1.53597	8	5.75411
Trial 1	M1-2	C-P	M	0:01:51.986-0:01:52.252	BL	3.22505	8	12.0819
Trial 1	M1-2	C-P	M	0:01:52.252-0:01:52.518	BL	0.590839	8	2.21343
Trial 1	M1-2	C-P	M	0:01:52.518-0:01:52.784	BL	0.817645	8	3.06311
Trial 1	M1-2	C-P	M	0:01:52.784-0:01:53.050	BL	0.981211	8	3.67585
Trial 1	M1-2	C-P	M	0:01:53.050-0:01:53.316	BL	0.977979	8	3.66374
Trial 1	M1-2	C-P	M	0:01:53.316-0:01:53.582	BL	1.35417	8	5.07306
Trial 1	M1-2	C-P	M	0:01:53.582-0:01:53.848	BL	1.38066	8	5.1723
Trial 1	M1-2	C-P	M	0:01:53.848-0:01:54.114	BL	2.74189	7	11.7392
Trial 1	M1-2	C-P	M	0:01:54.114-0:01:54.380	BL	3.41635	8	12.7985
Trial 1	M1-2	C-P	M	0:01:54.380-0:01:54.646	BL	2.63318	8	9.86454
Trial 1	M1-2	C-P	M	0:01:54.646-0:01:54.912	BL	2.9845	8	11.1807
Trial 1	M1-2	C-P	M	0:01:54.912-0:01:55.178	BL	2.18763	8	8.19546
Trial 1	M1-2	C-P	M	0:01:55.178-0:01:55.444	BL	3.05267	8	11.436
Trial 1	M1-2	C-P	M	0:01:55.444-0:01:55.710	BL	1.83861	8	6.88792
Trial 1	M1-2	C-P	M	0:01:55.710-0:01:55.976	BL	1.837	8	6.88191
Trial 1	M1-2	C-P	M	0:01:55.976-0:01:56.242	BL	1.69729	8	6.35845
Trial 1	M1-2	C-P	M	0:01:56.242-0:01:56.508	BL	1.39624	8	5.23068
Trial 1	M1-2	C-P	M	0:01:56.508-0:01:56.774	BL	1.18825	8	4.45146
Trial 1	M1-2	C-P	M	0:01:56.774-0:01:57.040	BL	3.40953	8	12.773
Trial 1	M1-2	C-P	M	0:01:57.040-0:01:57.306	BL	2.40645	8	9.01508
Trial 1	M1-2	C-P	M	0:01:57.306-0:01:57.572	BL	0.4193	8	1.57079
Trial 1	M1-2	C-P	M	0:01:57.572-0:01:57.838	BL	0.878686	8	3.29178
Trial 1	M1-2	C-P	M	0:01:57.838-0:01:58.104	BL	0.855767	8	3.2059
Trial 1	M1-2	C-P	M	0:01:58.104-0:01:58.370	BL	0.907651	8	3.40028
Trial 1	M1-2	C-P	M	0:01:58.370-0:01:58.636	BL	2.3887	8	8.94867
Trial 1	M1-2	C-P	M	0:01:58.636-0:01:58.902	BL	4.37711	8	16.3977
Trial 1	M1-2	C-P	M	0:01:58.902-0:01:59.168	BL	2.39735	8	8.98112
Trial 1	M1-2	C-P	M	0:01:59.168-0:01:59.434	BL	1.76805	8	6.62352
Trial 1	M1-2	C-P	M	0:01:59.434-0:01:59.700	BL	0.574748	8	2.15317
Trial 1	M1-2	C-P	M	0:01:59.700-0:01:59.966	BL	0.681319	8	2.55239
Trial 1	M1-2	C-P	M	0:01:59.966-0:02:00.232	BL	0.414002	8	1.55095
Trial 1	M1-2	C-P	M	0:02:00.232-0:02:00.498	BL	0.691395	8	2.59016
Trial 1	M1-2	C-P	M	0:02:00.498-0:02:00.764	BL	1.15022	8	4.309
Trial 1	M1-2	C-P	M	0:02:00.764-0:02:01.030	BL	1.34553	8	5.04067
Trial 1	M1-2	C-P	M	0:02:01.030-0:02:01.296	BL	0.908185	8	3.40228
Trial 1	M1-2	C-P	M	0:02:01.296-0:02:01.562	BL	0.91054	8	3.4111
Trial 1	M1-2	C-P	M	0:02:01.562-0:02:01.828	BL	0.794065	8	2.97477
Trial 1	M1-2	C-P	M	0:02:01.828-0:02:02.094	BL	1.25843	8	4.7144
Trial 1	M1-2	C-P	M	0:02:02.094-0:02:02.360	BL	2.04697	8	7.66845
Trial 1	M1-2	C-P	M	0:02:02.360-0:02:02.626	BL	1.84294	8	6.90406
Trial 1	M1-2	C-P	M	0:02:02.626-0:02:02.892	BL	2.08801	8	7.82218
Trial 1	M1-2	C-P	M	0:02:02.892-0:02:03.158	BL	1.42195	8	5.327
Trial 1	M1-2	C-P	M	0:02:03.158-0:02:03.424	BL	1.5534	8	5.81943
Trial 1	M1-2	C-P	M	0:02:03.424-0:02:03.690	BL	2.60946	7	11.1723
Trial 1	M1-2	C-P	M	0:02:03.690-0:02:03.956	BL	3.34527	8	12.5322
Trial 1	M1-2	C-P	M	0:02:03.956-0:02:04.222	BL	1.20306	8	4.50696
Trial 1	M1-2	C-P	M	0:02:04.222-0:02:04.488	BL	2.50136	8	9.37067
Trial 1	M1-2	C-P	M	0:02:04.488-0:02:04.754	BL	4.51287	8	16.9063
Trial 1	M1-2	C-P	M	0:02:04.754-0:02:05.020	BL	1.03172	8	3.86509
Trial 1	M1-2	C-P	M	0:02:05.020-0:02:05.286	BL	0.98445	8	3.688
Trial 1	M1-2	C-P	M	0:02:05.286-0:02:05.552	BL	2.00832	8	7.52364
Trial 1	M1-2	C-P	M	0:02:05.552-0:02:05.818	BL	0.830607	8	3.11165
Trial 1	M1-2	C-P	M	0:02:05.818-0:02:06.084	BL	0.971086	8	3.63793
Trial 1	M1-2	C-P	M	0:02:06.084-0:02:06.350	BL	1.26971	8	4.75668
Trial 1	M1-2	C-P	M	0:02:06.350-0:02:06.616	BL	3.13866	8	11.7582
Trial 1	M1-2	C-P	M	0:02:06.616-0:02:06.882	BL	1.17884	8	4.4162
Trial 1	M1-2	C-P	M	0:02:06.882-0:02:07.148	BL	1.05289	8	3.94437
Trial 1	M1-2	C-P	M	0:02:07.148-0:02:07.414	BL	1.0303	8	3.85976
Trial 1	M1-2	C-P	M	0:02:07.414-0:02:07.680	BL	0.62798	8	2.35256
Trial 1	M1-2	C-P	M	0:02:07.680-0:02:07.946	BL	0.786644	8	2.94697
Trial 1	M1-2	C-P	M	0:02:07.946-0:02:08.212	BL	2.01545	8	7.55035
Trial 1	M1-2	C-P	M	0:02:08.212-0:02:08.478	BL	2.06143	8	7.7227
Trial 1	M1-2	C-P	M	0:02:08.478-0:02:08.744	BL	2.54495	8	9.53407
Trial 1	M1-2	C-P	M	0:02:08.744-0:02:09.010	BL	1.70323	8	6.3807
Trial 1	M1-2	C-P	M	0:02:09.010-0:02:09.276	BL	3.15836	8	11.832
Trial 1	M1-2	C-P	M	0:02:09.276-0:02:09.542	BL	2.00854	8	7.52446
Trial 1	M1-2	C-P	M	0:02:09.542-0:02:09.808	BL	1.55008	8	5.80699
Trial 1	M1-2	C-P	M	0:02:09.808-0:02:10.074	BL	0.769129	8	2.88135
Trial 1	M1-2	C-P	M	0:02:10.074-0:02:10.340	BL	0.337513	8	1.2644
Trial 1	M1-2	C-P	M	0:02:10.340-0:02:10.606	BL	0.272794	8	1.02196
Trial 1	M1-2	C-P	M	0:02:10.606-0:02:10.872	BL	0.571892	8	2.14245
Trial 1	M1-2	C-P	M	0:02:10.872-0:02:11.138	BL	0.416955	8	1.56201
Trial 1	M1-2	C-P	M	0:02:11.138-0:02:11.404	BL	0.249428	8	0.934421
Trial 1	M1-2	C-P	M	0:02:11.404-0:02:11.670	BL	0.401564	8	1.50436
Trial 1	M1-2	C-P	M	0:02:11.670-0:02:11.936	BL	0.818085	8	3.06475
Trial 1	M1-2	C-P	M	0:02:11.936-0:02:12.202	BL	0.957426	8	3.58676
Trial 1	M1-2	C-P	M	0:02:12.202-0:02:12.468	BL	0.638791	8	2.39308
Trial 1	M1-2	C-P	M	0:02:12.468-0:02:12.734	BL	0.55849	8	2.09224
Trial 1	M1-2	C-P	M	0:02:12.734-0:02:13.000	BL	0.262425	8	0.98311
Trial 1	M1-2	C-P	M	0:02:13.000-0:02:13.266	BL	0.347757	7	1.48889
Trial 1	M1-2	C-P	M	0:02:13.266-0:02:13.532	BL	0.304854	8	1.14206
Trial 1	M1-2	C-P	M	0:02:13.532-0:02:13.798	BL	0.561735	8	2.1044
Trial 1	M1-2	C-P	M	0:02:13.798-0:02:14.064	BL	0.381051	8	1.42751
Trial 1	M1-2	C-P	M	0:02:14.064-0:02:14.330	BL	0.985346	8	3.69135
Trial 1	M1-2	C-P	M	0:02:14.330-0:02:14.596	BL	2.88934	8	10.8242
Trial 1	M1-2	C-P	M	0:02:14.596-0:02:14.862	BL	0.933842	8	3.49844
Trial 1	M1-2	C-P	M	0:02:14.862-0:02:15.128	BL	1.6088	8	6.02696
Trial 1	M1-2	C-P	M	0:02:15.128-0:02:15.394	BL	1.3894	8	5.20504
Trial 1	M1-2	C-P	M	0:02:15.394-0:02:15.660	BL	1.02196	8	3.82852
Trial 1	M1-2	C-P	M	0:02:15.660-0:02:15.926	BL	1.56812	8	5.87454
Trial 1	M1-2	C-P	M	0:02:15.926-0:02:16.192	BL	0.516755	8	1.93592
Trial 1	M1-2	C-P	M	0:02:16.192-0:02:16.458	BL	0.203544	8	0.762522
Trial 1	M1-2	C-P	M	0:02:16.458-0:02:16.724	BL	0.340767	8	1.2766
Trial 1	M1-2	C-P	M	0:02:16.724-0:02:16.990	BL	2.0881	8	7.82255
Trial 1	M1-2	C-P	M	0:02:16.990-0:02:17.256	BL	2.63307	8	9.86412
Trial 1	M1-2	C-P	M	0:02:17.256-0:02:17.522	BL	2.69413	8	10.0929
Trial 1	M1-2	C-P	M	0:02:17.522-0:02:17.788	BL	1.13017	8	4.23391
Trial 1	M1-2	C-P	M	0:02:17.788-0:02:18.054	BL	0.245889	8	0.921163
Trial 1	M1-2	C-P	M	0:02:18.054-0:02:18.320	BL	0.552396	8	2.0694
Trial 1	M1-2	C-P	M	0:02:18.320-0:02:18.586	BL	2.24813	8	8.42204
Trial 1	M1-2	C-P	M	0:02:18.586-0:02:18.852	BL	1.98804	8	7.44772
Trial 1	M1-2	C-P	M	0:02:18.852-0:02:19.118	BL	1.24491	8	4.66375
Trial 1	M1-2	C-P	M	0:02:19.118-0:02:19.384	BL	3.36758	8	12.6157
Trial 1	M1-2	C-P	M	0:02:19.384-0:02:19.650	BL	1.35674	8	5.08266
Trial 1	M1-2	C-P	M	0:02:19.650-0:02:19.916	BL	1.39581	8	5.22908
Trial 1	M1-2	C-P	M	0:02:19.916-0:02:20.182	BL	1.66717	8	6.24569
Trial 1	M1-2	C-P	M	0:02:20.182-0:02:20.448	BL	1.61572	8	6.0529
Trial 1	M1-2	C-P	M	0:02:20.448-0:02:20.714	BL	0.604887	8	2.26604
Trial 1	M1-2	C-P	M	0:02:20.714-0:02:20.980	BL	0.50633	8	1.89684
Trial 1	M1-2	C-P	M	0:02:20.980-0:02:21.246	BL	1.21932	8	4.56787
Trial 1	M1-2	C-P	M	0:02:21.246-0:02:21.512	BL	1.70059	8	6.37086
Trial 1	M1-2	C-P	M	0:02:21.512-0:02:21.778	BL	0.728411	8	2.7288
Trial 1	M1-2	C-P	M	0:02:21.778-0:02:22.044	BL	0.684037	8	2.56258
Trial 1	M1-2	C-P	M	0:02:22.044-0:02:22.310	BL	1.20504	8	4.51438
Trial 1	M1-2	C-P	M	0:02:22.310-0:02:22.576	BL	0.816074	8	3.0572
Trial 1	M1-2	C-P	M	0:02:22.576-0:02:22.842	BL	1.0836	7	4.63938
Trial 1	M1-2	C-P	M	0:02:22.842-0:02:23.108	BL	0.512883	8	1.9214
Trial 1	M1-2	C-P	M	0:02:23.108-0:02:23.374	BL	1.19669	8	4.48307
Trial 1	M1-2	C-P	M	0:02:23.374-0:02:23.640	BL	2.48925	8	9.32546
Trial 1	M1-2	C-P	M	0:02:23.640-0:02:23.906	BL	1.04468	8	3.91362
Trial 1	M1-2	C-P	M	0:02:23.906-0:02:24.172	BL	0.538854	8	2.01867
Trial 1	M1-2	C-P	M	0:02:24.172-0:02:24.438	BL	0.402275	8	1.50702
Trial 1	M1-2	C-P	M	0:02:24.438-0:02:24.704	BL	0.421068	8	1.57742
Trial 1	M1-2	C-P	M	0:02:24.704-0:02:24.970	BL	0.707232	8	2.64948
Trial 1	M1-2	C-P	M	0:02:24.970-0:02:25.236	BL	0.858912	8	3.2177
Trial 1	M1-2	C-P	M	0:02:25.236-0:02:25.502	BL	0.291629	8	1.09252
Trial 1	M1-2	C-P	M	0:02:25.502-0:02:25.768	BL	1.12847	8	4.22754
Trial 1	M1-2	C-P	M	0:02:25.768-0:02:26.034	BL	0.432985	8	1.62207
Trial 1	M1-2	C-P	M	0:02:26.034-0:02:26.300	BL	0.890176	8	3.33482
Trial 1	M1-2	C-P	M	0:02:26.300-0:02:26.566	BL	0.995061	8	3.72775
Trial 1	M1-2	C-P	M	0:02:26.566-0:02:26.832	BL	0.820601	8	3.07416
Trial 1	M1-2	C-P	M	0:02:26.832-0:02:27.098	BL	1.62009	8	6.06926
Trial 1	M1-2	C-P	M	0:02:27.098-0:02:27.364	BL	2.09459	8	7.84684
Trial 1	M1-2	C-P	M	0:02:27.364-0:02:27.630	BL	1.02061	8	3.82345
Trial 1	M1-2	C-P	M	0:02:27.630-0:02:27.896	BL	2.46508	8	9.2348
Trial 1	M1-2	C-P	M	0:02:27.896-0:02:28.162	BL	1.2118	8	4.53968
Trial 1	M1-2	C-P	M	0:02:28.162-0:02:28.428	BL	0.466143	8	1.7463
Trial 1	M1-2	C-P	M	0:02:28.428-0:02:28.694	BL	1.32377	8	4.95918
Trial 1	M1-2	C-P	M	0:02:28.694-0:02:28.960	BL	3.24712	8	12.1646
Trial 1	M1-2	C-P	M	0:02:28.960-0:02:29.226	BL	2.7775	8	10.4052
Trial 1	M1-2	C-P	M	0:02:29.226-0:02:29.492	BL	2.485	8	9.30942
Trial 1	M1-2	C-P	M	0:02:29.492-0:02:29.758	BL	1.88881	8	7.07597
Trial 1	M1-2	C-P	M	0:02:29.758-0:02:30.024	BL	0.49121	8	1.84021
Trial 1	M1-2	C-P	M	0:02:30.024-0:02:30.290	BL	0.474194	8	1.77646
Trial 1	M1-2	C-P	M	0:02:30.290-0:02:30.556	BL	1.25798	8	4.7127
Trial 1	M1-2	C-P	M	0:02:30.556-0:02:30.822	BL	2.06116	8	7.72158
Trial 1	M1-2	C-P	M	0:02:30.822-0:02:31.088	BL	1.15548	8	4.32873
Trial 1	M1-2	C-P	M	0:02:31.088-0:02:31.354	BL	1.8648	8	6.98602
Trial 1	M1-2	C-P	M	0:02:31.354-0:02:31.620	BL	1.82515	8	6.83749
Trial 1	M1-2	C-P	M	0:02:31.620-0:02:31.886	BL	2.04688	8	7.66809
Trial 1	M1-2	C-P	M	0:02:31.886-0:02:32.152	BL	4.84251	7	20.7329
Trial 1	M1-2	C-P	M	0:02:32.152-0:02:32.418	BL	0.919724	8	3.44551
Trial 1	M1-2	C-P	M	0:02:32.418-0:02:32.684	BL	2.77727	8	10.4044
Trial 1	M1-2	C-P	M	0:02:32.684-0:02:32.950	BL	3.51598	8	13.1718
Trial 1	M1-2	C-P	M	0:02:32.950-0:02:33.216	BL	1.16657	8	4.37028
Trial 1	M1-2	C-P	M	0:02:33.216-0:02:33.482	BL	1.78914	8	6.70253
Trial 1	M1-2	C-P	M	0:02:33.482-0:02:33.748	BL	2.94035	8	11.0153
Trial 1	M1-2	C-P	M	0:02:33.748-0:02:34.014	BL	2.02751	8	7.59555
Trial 1	M1-2	C-P	M	0:02:34.014-0:02:34.280	BL	1.46401	8	5.48452
Trial 1	M1-2	C-P	M	0:02:34.280-0:02:34.546	BL	0.812375	8	3.04337
Trial 1	M1-2	C-P	M	0:02:34.546-0:02:34.812	BL	1.59548	8	5.97703
Trial 1	M1-2	C-P	M	0:02:34.812-0:02:35.078	BL	1.56805	8	5.87433
Trial 1	M1-2	C-P	M	0:02:35.078-0:02:35.344	BL	0.796749	8	2.98482
Trial 1	M1-2	C-P	M	0:02:35.344-0:02:35.610	BL	3.1875	8	11.9412
Trial 1	M1-2	C-P	M	0:02:35.610-0:02:35.876	BL	1.05903	8	3.96738
Trial 1	M1-2	C-P	M	0:02:35.876-0:02:36.142	BL	0.149319	8	0.559389
Trial 1	M1-2	C-P	M	0:02:36.142-0:02:36.408	BL	0.984223	8	3.68714
Trial 1	M1-2	C-P	M	0:02:36.408-0:02:36.674	BL	0.554553	8	2.07749
Trial 1	M1-2	C-P	M	0:02:36.674-0:02:36.940	BL	0.8005	8	2.99886
Trial 1	M1-2	C-P	M	0:02:36.940-0:02:37.206	BL	0.275024	8	1.03031
Trial 1	M1-2	C-P	M	0:02:37.206-0:02:37.472	BL	0.831841	8	3.11627
Trial 1	M1-2	C-P	M	0:02:37.472-0:02:37.738	BL	0.631567	8	2.36601
Trial 1	M1-2	C-P	M	0:02:37.738-0:02:38.004	BL	0.564965	8	2.1165
Trial 1	M1-2	C-P	M	0:02:38.004-0:02:38.270	BL	0.328649	8	1.2312
Trial 1	M1-2	C-P	M	0:02:38.270-0:02:38.536	BL	0.487483	8	1.82624
Trial 1	M1-2	C-P	M	0:02:38.536-0:02:38.802	BL	0.489106	8	1.83231
Trial 1	M1-2	C-P	M	0:02:38.802-0:02:39.068	BL	0.39658	8	1.48568
Trial 1	M1-2	C-P	M	0:02:39.068-0:02:39.334	BL	0.792155	8	2.96761
Trial 1	M1-2	C-P	M	0:02:39.334-0:02:39.600	BL	0.771783	8	2.8913
Trial 1	M1-2	C-P	M	0:02:39.600-0:02:39.866	BL	1.67325	8	6.26843
Trial 1	M1-2	C-P	M	0:02:39.866-0:02:40.132	BL	0.623483	8	2.33572
Trial 1	M1-2	C-P	M	0:02:40.132-0:02:40.398	BL	1.69111	8	6.33533
Trial 1	M1-2	C-P	M	0:02:40.398-0:02:40.664	BL	1.46048	8	5.47129
Trial 1	M1-2	C-P	M	0:02:40.664-0:02:40.930	BL	1.03085	8	3.86184
Trial 1	M1-2	C-P	M	0:02:40.930-0:02:41.196	BL	0.906732	8	3.39684
Trial 1	M1-2	C-P	M	0:02:41.196-0:02:41.462	BL	0.924101	8	3.4619
Trial 1	M1-2	C-P	M	0:02:41.462-0:02:41.728	BL	0.406863	7	1.74195
Trial 1	M1-2	C-P	M	0:02:41.728-0:02:41.994	BL	0.692649	8	2.59484
Trial 1	M1-2	C-P	M	0:02:41.994-0:02:42.260	BL	0.839194	8	3.14381
Trial 1	M1-2	C-P	M	0:02:42.260-0:02:42.526	BL	1.11844	8	4.18995
Trial 1	M1-2	C-P	M	0:02:42.526-0:02:42.792	BL	0.952234	8	3.56733
Trial 1	M1-2	C-P	M	0:02:42.792-0:02:43.058	BL	1.32929	8	4.97986
Trial 1	M1-2	C-P	M	0:02:43.058-0:02:43.324	BL	0.869302	8	3.25663
Trial 1	M1-2	C-P	M	0:02:43.324-0:02:43.590	BL	1.05568	8	3.95484
Trial 1	M1-2	C-P	M	0:02:43.590-0:02:43.856	BL	0.421249	8	1.5781
Trial 1	M1-2	C-P	M	0:02:43.856-0:02:44.122	BL	0.307251	8	1.15105
Trial 1	M1-2	C-P	M	0:02:44.122-0:02:44.388	BL	0.312359	8	1.17017
Trial 1	M1-2	C-P	M	0:02:44.388-0:02:44.654	BL	0.372107	8	1.39401
Trial 1	M1-2	C-P	M	0:02:44.654-0:02:44.920	BL	0.37124	8	1.39075
Trial 1	M1-2	C-P	M	0:02:44.920-0:02:45.186	BL	0.465467	8	1.74375
Trial 1	M1-2	C-P	M	0:02:45.186-0:02:45.452	BL	0.878416	8	3.29078
Trial 1	M1-2	C-P	M	0:02:45.452-0:02:45.718	BL	2.68793	8	10.0696
Trial 1	M1-2	C-P	M	0:02:45.718-0:02:45.984	BL	2.43714	8	9.13018
Trial 1	M1-2	C-P	M	0:02:45.984-0:02:46.250	BL	2.76092	8	10.343
Trial 1	M1-2	C-P	M	0:02:46.250-0:02:46.516	BL	0.806481	8	3.02127
Trial 1	M1-2	C-P	M	0:02:46.516-0:02:46.782	BL	0.416128	8	1.55892
Trial 1	M1-2	C-P	M	0:02:46.782-0:02:47.048	BL	0.325443	8	1.2192
Trial 1	M1-2	C-P	M	0:02:47.048-0:02:47.314	BL	0.357859	8	1.34063
Trial 1	M1-2	C-P	M	0:02:47.314-0:02:47.580	BL	0.355988	8	1.33362
Trial 1	M1-2	C-P	M	0:02:47.580-0:02:47.846	BL	0.478744	8	1.79349
Trial 1	M1-2	C-P	M	0:02:47.846-0:02:48.112	BL	0.376383	8	1.41003
Trial 1	M1-2	C-P	M	0:02:48.112-0:02:48.378	BL	0.497322	8	1.86309
Trial 1	M1-2	C-P	M	0:02:48.378-0:02:48.644	BL	0.346451	8	1.29791
Trial 1	M1-2	C-P	M	0:02:48.644-0:02:48.910	BL	0.39086	8	1.46425
Trial 1	M1-2	C-P	M	0:02:48.910-0:02:49.176	BL	0.355501	8	1.33179
Trial 1	M1-2	C-P	M	0:02:49.176-0:02:49.442	BL	0.429086	8	1.60746
Trial 1	M1-2	C-P	M	0:02:49.442-0:02:49.708	BL	0.344204	8	1.28947
Trial 1	M1-2	C-P	M	0:02:49.708-0:02:49.974	BL	0.346938	8	1.29973
Trial 1	M1-2	C-P	M	0:02:49.974-0:02:50.240	BL	0.377838	8	1.41547
Trial 1	M1-2	C-P	M	0:02:50.240-0:02:50.506	BL	0.28388	8	1.06349
Trial 1	M1-2	C-P	M	0:02:50.506-0:02:50.772	BL	0.357789	8	1.34037
Trial 1	M1-2	C-P	M	0:02:50.772-0:02:51.038	BL	0.359978	8	1.34856
Trial 1	M1-2	C-P	M	0:02:51.038-0:02:51.304	BL	0.329694	7	1.41155
Trial 1	M1-2	C-P	M	0:02:51.304-0:02:51.570	BL	0.243606	8	0.912607
Trial 1	M1-2	C-P	M	0:02:51.570-0:02:51.836	BL	0.335608	8	1.25727
Trial 1	M1-2	C-P	M	0:02:51.836-0:02:52.102	BL	0.285332	8	1.06893
Trial 1	M1-2	C-P	M	0:02:52.102-0:02:52.368	BL	0.312816	8	1.17188
Trial 1	M1-2	C-P	M	0:02:52.368-0:02:52.634	BL	0.410659	8	1.53843
Trial 1	M1-2	C-P	M	0:02:52.634-0:02:52.900	BL	0.329936	8	1.23603
Trial 1	M1-2	C-P	M	0:02:52.900-0:02:53.166	BL	0.414028	8	1.55106
Trial 1	M1-2	C-P	M	0:02:53.166-0:02:53.432	BL	0.38926	8	1.45827
Trial 1	M1-2	C-P	M	0:02:53.432-0:02:53.698	BL	0.550219	8	2.06126
Trial 1	M1-2	C-P	M	0:02:53.698-0:02:53.964	BL	0.576852	8	2.16103
Trial 1	M1-2	C-P	M	0:02:53.964-0:02:54.230	BL	0.555283	8	2.08022
Trial 1	M1-2	C-P	M	0:02:54.230-0:02:54.496	BL	0.416064	8	1.55867
Trial 1	M1-2	C-P	M	0:02:54.496-0:02:54.762	BL	0.312157	8	1.16942
Trial 1	M1-2	C-P	M	0:02:54.762-0:02:55.028	BL	0.42555	8	1.59421
Trial 1	M1-2	C-P	M	0:02:55.028-0:02:55.294	BL	0.488495	8	1.83002
Trial 1	M1-2	C-P	M	0:02:55.294-0:02:55.560	BL	0.314787	8	1.17927
Trial 1	M1-2	C-P	M	0:02:55.560-0:02:55.826	BL	0.456118	8	1.70872
Trial 1	M1-2	C-P	M	0:02:55.826-0:02:56.092	BL	0.300728	8	1.12661
Trial 1	M1-2	C-P	M	0:02:56.092-0:02:56.358	BL	0.193811	8	0.726065
Trial 1	M1-2	C-P	M	0:02:56.358-0:02:56.624	BL	0.240682	8	0.90165
Trial 1	M1-2	C-P	M	0:02:56.624-0:02:56.890	BL	0.221262	8	0.828908
Trial 1	M1-2	C-P	M	0:02:56.890-0:02:57.156	BL	0.160245	8	0.600314
Trial 1	M1-2	C-P	M	0:02:57.156-0:02:57.422	BL	0.246737	8	0.924341
Trial 1	M1-2	C-P	M	0:02:57.422-0:02:57.688	BL	0.472493	8	1.77008
Trial 1	M1-2	C-P	M	0:02:57.688-0:02:57.954	BL	0.579154	8	2.16965
Trial 1	M1-2	C-P	M	0:02:57.954-0:02:58.220	BL	0.29463	8	1.10376
Trial 1	M1-2	C-P	M	0:02:58.220-0:02:58.486	BL	0.633352	8	2.37268
Trial 1	M1-2	C-P	M	0:02:58.486-0:02:58.752	BL	0.380122	8	1.42404
Trial 1	M1-2	C-P	M	0:02:58.752-0:02:59.018	BL	0.554684	8	2.07799
Trial 1	M1-2	C-P	M	0:02:59.018-0:02:59.284	BL	0.453067	8	1.6973
Trial 1	M1-2	C-P	M	0:02:59.284-0:02:59.550	BL	0.495421	8	1.85597
Trial 1	M1-2	C-P	M	0:02:59.550-0:02:59.816	BL	0.320484	8	1.20061
Trial 1	M1-2	C-P	M	0:02:59.816-0:03:00.082	BL	0.161398	8	0.604636
Trial 1	M1-2	C-P	M	0:03:00.082-0:03:00.348	CS1a	0.509766	8	1.9097
Trial 1	M1-2	C-P	M	0:03:00.348-0:03:00.614	CS1a	0.31173	8	1.16782
Trial 1	M1-2	C-P	M	0:03:00.614-0:03:00.880	CS1a	0.371093	7	1.5888
Trial 1	M1-2	C-P	M	0:03:00.880-0:03:01.146	CS1a	0.109764	8	0.411205
Trial 1	M1-2	C-P	M	0:03:01.146-0:03:01.412	CS1a	0.821307	8	3.07682
Trial 1	M1-2	C-P	M	0:03:01.412-0:03:01.678	CS1a	0.418202	8	1.56669
Trial 1	M1-2	C-P	M	0:03:01.678-0:03:01.944	CS1a	0.717344	8	2.68736
Trial 1	M1-2	C-P	M	0:03:01.944-0:03:02.210	CS1a	0.589557	8	2.20862
Trial 1	M1-2	C-P	M	0:03:02.210-0:03:02.476	CS1a	0.822165	8	3.08004
Trial 1	M1-2	C-P	M	0:03:02.476-0:03:02.742	CS1a	0.478694	8	1.79331
Trial 1	M1-2	C-P	M	0:03:02.742-0:03:03.008	CS1a	0.465402	8	1.74352
Trial 1	M1-2	C-P	M	0:03:03.008-0:03:03.274	CS1a	0.855169	8	3.20367
Trial 1	M1-2	C-P	M	0:03:03.274-0:03:03.540	CS1a	0.835219	8	3.12893
Trial 1	M1-2	C-P	M	0:03:03.540-0:03:03.806	CS1a	1.06116	8	3.97536
Trial 1	M1-2	C-P	M	0:03:03.806-0:03:04.072	CS1a	1.19142	8	4.46333
Trial 1	M1-2	C-P	M	0:03:04.072-0:03:04.338	CS1a	0.767581	8	2.87556
Trial 1	M1-2	C-P	M	0:03:04.338-0:03:04.604	CS1a	1.78458	8	6.68546
Trial 1	M1-2	C-P	M	0:03:04.604-0:03:04.870	CS1a	1.06649	8	3.99535
Trial 1	M1-2	C-P	M	0:03:04.870-0:03:05.136	CS1a	0.873215	8	3.2713
Trial 1	M1-2	C-P	M	0:03:05.136-0:03:05.402	CS1a	0.229464	8	0.859628
Trial 1	M1-2	C-P	M	0:03:05.402-0:03:05.668	CS1a	0.849146	8	3.18113
Trial 1	M1-2	C-P	M	0:03:05.668-0:03:05.934	CS1a	1.48568	8	5.56571
Trial 1	M1-2	C-P	M	0:03:05.934-0:03:06.200	CS1a	1.69097	8	6.33478
Trial 1	M1-2	C-P	M	0:03:06.200-0:03:06.466	CS1a	1.53677	8	5.75712
Trial 1	M1-2	C-P	M	0:03:06.466-0:03:06.732	CS1a	2.79499	8	10.4707
Trial 1	M1-2	C-P	M	0:03:06.732-0:03:06.998	CS1a	1.73434	8	6.49727
Trial 1	M1-2	C-P	M	0:03:06.998-0:03:07.264	CS1a	0.48578	8	1.81985
Trial 1	M1-2	C-P	M	0:03:07.264-0:03:07.530	CS1a	3.00514	8	11.258
Trial 1	M1-2	C-P	M	0:03:07.530-0:03:07.796	CS1a	0.878817	8	3.29227
Trial 1	M1-2	C-P	M	0:03:07.796-0:03:08.062	CS1a	0.848235	8	3.17769
Trial 1	M1-2	C-P	M	0:03:08.062-0:03:08.328	CS1a	1.96664	8	7.36753
Trial 1	M1-2	C-P	M	0:03:08.328-0:03:08.594	CS1a	2.83832	8	10.633
Trial 1	M1-2	C-P	M	0:03:08.594-0:03:08.860	CS1a	4.01547	8	15.043
Trial 1	M1-2	C-P	M	0:03:08.860-0:03:09.126	CS1a	2.68138	8	10.0452
Trial 1	M1-2	C-P	M	0:03:09.126-0:03:09.392	CS1a	0.860361	8	3.22312
Trial 1	M1-2	C-P	M	0:03:09.392-0:03:09.658	CS1a	1.34397	8	5.03487
Trial 1	M1-2	C-P	M	0:03:09.658-0:03:09.924	CS1a	3.1531	8	11.8123
Trial 1	M1-2	C-P	M	0:03:09.924-0:03:10.190	CS1b	1.18683	7	5.08133
Trial 1	M1-2	C-P	M	0:03:10.190-0:03:10.456	CS1b	1.34978	8	5.05664
Trial 1	M1-2	C-P	M	0:03:10.456-0:03:10.722	CS1b	0.6683	8	2.50362
Trial 1	M1-2	C-P	M	0:03:10.722-0:03:10.988	CS1b	0.654836	8	2.4532
Trial 1	M1-2	C-P	M	0:03:10.988-0:03:11.254	CS1b	0.570503	8	2.13725
Trial 1	M1-2	C-P	M	0:03:11.254-0:03:11.520	CS1b	0.636215	8	2.38342
Trial 1	M1-2	C-P	M	0:03:11.520-0:03:11.786	CS1b	0.88314	8	3.30846
Trial 1	M1-2	C-P	M	0:03:11.786-0:03:12.052	CS1b	0.572225	8	2.14369
Trial 1	M1-2	C-P	M	0:03:12.052-0:03:12.318	CS1b	0.666155	8	2.49557
Trial 1	M1-2	C-P	M	0:03:12.318-0:03:12.584	CS1b	1.02618	8	3.84437
Trial 1	M1-2	C-P	M	0:03:12.584-0:03:12.850	CS1b	1.17131	8	4.38803
Trial 1	M1-2	C-P	M	0:03:12.850-0:03:13.116	CS1b	0.736839	8	2.76039
Trial 1	M1-2	C-P	M	0:03:13.116-0:03:13.382	CS1b	0.774281	8	2.90065
Trial 1	M1-2	C-P	M	0:03:13.382-0:03:13.648	CS1b	0.761198	8	2.85162
Trial 1	M1-2	C-P	M	0:03:13.648-0:03:13.914	CS1b	1.93925	8	7.26492
Trial 1	M1-2	C-P	M	0:03:13.914-0:03:14.180	CS1b	0.720896	8	2.70066
Trial 1	M1-2	C-P	M	0:03:14.180-0:03:14.446	CS1b	1.54102	8	5.77307
Trial 1	M1-2	C-P	M	0:03:14.446-0:03:14.712	CS1b	6.71163	8	25.1435
Trial 1	M1-2	C-P	M	0:03:14.712-0:03:14.978	CS1b	4.90157	8	18.3625
Trial 1	M1-2	C-P	M	0:03:14.978-0:03:15.244	CS1b	2.25524	8	8.44878
Trial 1	M1-2	C-P	M	0:03:15.244-0:03:15.510	CS1b	1.97719	8	7.40704
Trial 1	M1-2	C-P	M	0:03:15.510-0:03:15.776	CS1b	0.923147	8	3.45836
Trial 1	M1-2	C-P	M	0:03:15.776-0:03:16.042	CS1b	0.690713	8	2.58757
Trial 1	M1-2	C-P	M	0:03:16.042-0:03:16.308	CS1b	0.813074	8	3.04597
Trial 1	M1-2	C-P	M	0:03:16.308-0:03:16.574	CS1b	1.01535	8	3.80378
Trial 1	M1-2	C-P	M	0:03:16.574-0:03:16.840	CS1b	0.72262	8	2.70711
Trial 1	M1-2	C-P	M	0:03:16.840-0:03:17.106	CS1b	1.23787	8	4.63739
Trial 1	M1-2	C-P	M	0:03:17.106-0:03:17.372	CS1b	1.17087	8	4.38638
Trial 1	M1-2	C-P	M	0:03:17.372-0:03:17.638	CS1b	1.16058	8	4.34783
Trial 1	M1-2	C-P	M	0:03:17.638-0:03:17.904	CS1b	2.52886	8	9.47368
Trial 1	M1-2	C-P	M	0:03:17.904-0:03:18.170	CS1b	1.80945	8	6.77869
Trial 1	M1-2	C-P	M	0:03:18.170-0:03:18.436	CS1b	0.711912	8	2.667
Trial 1	M1-2	C-P	M	0:03:18.436-0:03:18.702	CS1b	0.349571	8	1.30958
Trial 1	M1-2	C-P	M	0:03:18.702-0:03:18.968	CS1b	0.633017	8	2.37143
Trial 1	M1-2	C-P	M	0:03:18.968-0:03:19.234	CS1b	0.549266	8	2.0577
Trial 1	M1-2	C-P	M	0:03:19.234-0:03:19.500	CS1b	3.22759	8	12.0914
Trial 1	M1-2	C-P	M	0:03:19.500-0:03:19.766	CS1b	2.81668	7	12.0593
Trial 1	M1-2	C-P	M	0:03:19.766-0:03:20.032	CS1b	4.13387	8	15.4865
Trial 1	M1-2	C-P	M	0:03:20.032-0:03:20.298	IT1	2.01099	8	7.53361
Trial 1	M1-2	C-P	M	0:03:20.298-0:03:20.564	IT1	1.16399	8	4.36058
Trial 1	M1-2	C-P	M	0:03:20.564-0:03:20.830	IT1	0.336835	8	1.26188
Trial 1	M1-2	C-P	M	0:03:20.830-0:03:21.096	IT1	4.42447	8	16.5752
Trial 1	M1-2	C-P	M	0:03:21.096-0:03:21.362	IT1	1.94504	8	7.28669
Trial 1	M1-2	C-P	M	0:03:21.362-0:03:21.628	IT1	1.65382	8	6.19563
Trial 1	M1-2	C-P	M	0:03:21.628-0:03:21.894	IT1	0.446783	8	1.67376
Trial 1	M1-2	C-P	M	0:03:21.894-0:03:22.160	IT1	2.26805	8	8.49666
Trial 1	M1-2	C-P	M	0:03:22.160-0:03:22.426	IT1	1.51578	8	5.67846
Trial 1	M1-2	C-P	M	0:03:22.426-0:03:22.692	IT1	2.31523	8	8.67343
Trial 1	M1-2	C-P	M	0:03:22.692-0:03:22.958	IT1	4.00034	8	14.9863
Trial 1	M1-2	C-P	M	0:03:22.958-0:03:23.224	IT1	2.35585	8	8.82558
Trial 1	M1-2	C-P	M	0:03:23.224-0:03:23.490	IT1	1.65544	8	6.20167
Trial 1	M1-2	C-P	M	0:03:23.490-0:03:23.756	IT1	0.47425	8	1.77665
Trial 1	M1-2	C-P	M	0:03:23.756-0:03:24.022	IT1	1.95068	8	7.30778
Trial 1	M1-2	C-P	M	0:03:24.022-0:03:24.288	IT1	0.790387	8	2.96098
Trial 1	M1-2	C-P	M	0:03:24.288-0:03:24.554	IT1	0.655723	8	2.45649
Trial 1	M1-2	C-P	M	0:03:24.554-0:03:24.820	IT1	0.497477	8	1.86367
Trial 1	M1-2	C-P	M	0:03:24.820-0:03:25.086	IT1	0.874344	8	3.2755
Trial 1	M1-2	C-P	M	0:03:25.086-0:03:25.352	IT1	1.61132	8	6.03645
Trial 1	M1-2	C-P	M	0:03:25.352-0:03:25.618	IT1	4.72729	8	17.7096
Trial 1	M1-2	C-P	M	0:03:25.618-0:03:25.884	IT1	1.92396	8	7.20761
Trial 1	M1-2	C-P	M	0:03:25.884-0:03:26.150	IT1	3.80723	8	14.2628
Trial 1	M1-2	C-P	M	0:03:26.150-0:03:26.416	IT1	2.78799	8	10.4445
Trial 1	M1-2	C-P	M	0:03:26.416-0:03:26.682	IT1	1.21665	8	4.55787
Trial 1	M1-2	C-P	M	0:03:26.682-0:03:26.948	IT1	0.924409	8	3.46306
Trial 1	M1-2	C-P	M	0:03:26.948-0:03:27.214	IT1	2.61652	8	9.8021
Trial 1	M1-2	C-P	M	0:03:27.214-0:03:27.480	IT1	2.04817	8	7.67295
Trial 1	M1-2	C-P	M	0:03:27.480-0:03:27.746	IT1	0.670875	8	2.51326
Trial 1	M1-2	C-P	M	0:03:27.746-0:03:28.012	IT1	0.376556	8	1.41068
Trial 1	M1-2	C-P	M	0:03:28.012-0:03:28.278	IT1	0.29461	8	1.10368
Trial 1	M1-2	C-P	M	0:03:28.278-0:03:28.544	IT1	0.207481	8	0.777278
Trial 1	M1-2	C-P	M	0:03:28.544-0:03:28.810	IT1	0.309534	8	1.15959
Trial 1	M1-2	C-P	M	0:03:28.810-0:03:29.076	IT1	0.3572	8	1.33816
Trial 1	M1-2	C-P	M	0:03:29.076-0:03:29.342	IT1	0.351535	7	1.50508
Trial 1	M1-2	C-P	M	0:03:29.342-0:03:29.608	IT1	0.611059	8	2.28918
Trial 1	M1-2	C-P	M	0:03:29.608-0:03:29.874	IT1	1.22424	8	4.58629
Trial 1	M1-2	C-P	M	0:03:29.874-0:03:30.140	IT1	3.26877	8	12.2456
Trial 1	M1-2	C-P	M	0:03:30.140-0:03:30.406	IT1	0.89613	8	3.35711
Trial 1	M1-2	C-P	M	0:03:30.406-0:03:30.672	IT1	1.00077	8	3.74914
Trial 1	M1-2	C-P	M	0:03:30.672-0:03:30.938	IT1	1.01181	8	3.79051
Trial 1	M1-2	C-P	M	0:03:30.938-0:03:31.204	IT1	1.79116	8	6.71012
Trial 1	M1-2	C-P	M	0:03:31.204-0:03:31.470	IT1	1.5001	8	5.61976
Trial 1	M1-2	C-P	M	0:03:31.470-0:03:31.736	IT1	0.341289	8	1.27856
Trial 1	M1-2	C-P	M	0:03:31.736-0:03:32.002	IT1	0.437007	8	1.63713
Trial 1	M1-2	C-P	M	0:03:32.002-0:03:32.268	IT1	1.60932	8	6.02891
Trial 1	M1-2	C-P	M	0:03:32.268-0:03:32.534	IT1	0.759828	8	2.84651
Trial 1	M1-2	C-P	M	0:03:32.534-0:03:32.800	IT1	0.884948	8	3.31524
Trial 1	M1-2	C-P	M	0:03:32.800-0:03:33.066	IT1	1.42187	8	5.3267
Trial 1	M1-2	C-P	M	0:03:33.066-0:03:33.332	IT1	1.04887	8	3.92931
Trial 1	M1-2	C-P	M	0:03:33.332-0:03:33.598	IT1	0.3755	8	1.40672
Trial 1	M1-2	C-P	M	0:03:33.598-0:03:33.864	IT1	0.875839	8	3.2811
Trial 1	M1-2	C-P	M	0:03:33.864-0:03:34.130	IT1	4.22553	8	15.8299
Trial 1	M1-2	C-P	M	0:03:34.130-0:03:34.396	IT1	1.58699	8	5.94529
Trial 1	M1-2	C-P	M	0:03:34.396-0:03:34.662	IT1	0.696	8	2.6074
Trial 1	M1-2	C-P	M	0:03:34.662-0:03:34.928	IT1	0.403184	8	1.51044
Trial 1	M1-2	C-P	M	0:03:34.928-0:03:35.194	IT1	0.81177	8	3.0411
Trial 1	M1-2	C-P	M	0:03:35.194-0:03:35.460	IT1	0.480063	8	1.79843
Trial 1	M1-2	C-P	M	0:03:35.460-0:03:35.726	IT1	0.473688	8	1.77455
Trial 1	M1-2	C-P	M	0:03:35.726-0:03:35.992	IT1	0.205577	8	0.770148
Trial 1	M1-2	C-P	M	0:03:35.992-0:03:36.258	IT1	0.392486	8	1.47035
Trial 1	M1-2	C-P	M	0:03:36.258-0:03:36.524	IT1	0.227705	8	0.853037
Trial 1	M1-2	C-P	M	0:03:36.524-0:03:36.790	IT1	0.575819	8	2.15717
Trial 1	M1-2	C-P	M	0:03:36.790-0:03:37.056	IT1	2.68606	8	10.0626
Trial 1	M1-2	C-P	M	0:03:37.056-0:03:37.322	IT1	3.27341	8	12.263
Trial 1	M1-2	C-P	M	0:03:37.322-0:03:37.588	IT1	3.21779	8	12.0547
Trial 1	M1-2	C-P	M	0:03:37.588-0:03:37.854	IT1	2.20315	8	8.25357
Trial 1	M1-2	C-P	M	0:03:37.854-0:03:38.120	IT1	1.73491	8	6.49946
Trial 1	M1-2	C-P	M	0:03:38.120-0:03:38.386	IT1	2.24632	8	8.41524
Trial 1	M1-2	C-P	M	0:03:38.386-0:03:38.652	IT1	1.07538	8	4.02864
Trial 1	M1-2	C-P	M	0:03:38.652-0:03:38.918	IT1	0.739544	7	3.16629
Trial 1	M1-2	C-P	M	0:03:38.918-0:03:39.184	IT1	0.697603	8	2.61341
Trial 1	M1-2	C-P	M	0:03:39.184-0:03:39.450	IT1	0.838316	8	3.14054
Trial 1	M1-2	C-P	M	0:03:39.450-0:03:39.716	IT1	0.874427	8	3.27581
Trial 1	M1-2	C-P	M	0:03:39.716-0:03:39.982	IT1	1.33329	8	4.99484
Trial 1	M1-2	C-P	M	0:03:39.982-0:03:40.248	IT1	1.78214	8	6.67636
Trial 1	M1-2	C-P	M	0:03:40.248-0:03:40.514	IT1	2.51785	8	9.43253
Trial 1	M1-2	C-P	M	0:03:40.514-0:03:40.780	IT1	2.10723	8	7.89428
Trial 1	M1-2	C-P	M	0:03:40.780-0:03:41.046	IT1	1.85528	8	6.95043
Trial 1	M1-2	C-P	M	0:03:41.046-0:03:41.312	IT1	1.27914	8	4.79197
Trial 1	M1-2	C-P	M	0:03:41.312-0:03:41.578	IT1	0.891121	8	3.33834
Trial 1	M1-2	C-P	M	0:03:41.578-0:03:41.844	IT1	0.449905	8	1.68546
Trial 1	M1-2	C-P	M	0:03:41.844-0:03:42.110	IT1	3.12348	8	11.7014
Trial 1	M1-2	C-P	M	0:03:42.110-0:03:42.376	IT1	1.26055	8	4.72234
Trial 1	M1-2	C-P	M	0:03:42.376-0:03:42.642	IT1	0.359876	8	1.34818
Trial 1	M1-2	C-P	M	0:03:42.642-0:03:42.908	IT1	0.187692	8	0.703137
Trial 1	M1-2	C-P	M	0:03:42.908-0:03:43.174	IT1	0.128994	8	0.483249
Trial 1	M1-2	C-P	M	0:03:43.174-0:03:43.440	IT1	0.750632	8	2.81205
Trial 1	M1-2	C-P	M	0:03:43.440-0:03:43.706	IT1	0.605381	8	2.26792
Trial 1	M1-2	C-P	M	0:03:43.706-0:03:43.972	IT1	1.94929	8	7.30255
Trial 1	M1-2	C-P	M	0:03:43.972-0:03:44.238	IT1	1.48879	8	5.5774
Trial 1	M1-2	C-P	M	0:03:44.238-0:03:44.504	IT1	0.440354	8	1.64968
Trial 1	M1-2	C-P	M	0:03:44.504-0:03:44.770	IT1	0.491958	8	1.84299
Trial 1	M1-2	C-P	M	0:03:44.770-0:03:45.036	IT1	2.23868	8	8.3867
Trial 1	M1-2	C-P	M	0:03:45.036-0:03:45.302	IT1	1.1927	8	4.46814
Trial 1	M1-2	C-P	M	0:03:45.302-0:03:45.568	IT1	1.75053	8	6.5579
Trial 1	M1-2	C-P	M	0:03:45.568-0:03:45.834	IT1	4.64534	8	17.4027
Trial 1	M1-2	C-P	M	0:03:45.834-0:03:46.100	IT1	2.45756	8	9.20662
Trial 1	M1-2	C-P	M	0:03:46.100-0:03:46.366	IT1	1.58335	8	5.93163
Trial 1	M1-2	C-P	M	0:03:46.366-0:03:46.632	IT1	6.02694	8	22.5784
Trial 1	M1-2	C-P	M	0:03:46.632-0:03:46.898	IT1	2.05492	8	7.69822
Trial 1	M1-2	C-P	M	0:03:46.898-0:03:47.164	IT1	1.63915	8	6.14066
Trial 1	M1-2	C-P	M	0:03:47.164-0:03:47.430	IT1	2.84586	8	10.6613
Trial 1	M1-2	C-P	M	0:03:47.430-0:03:47.696	IT1	2.65919	8	9.96205
Trial 1	M1-2	C-P	M	0:03:47.696-0:03:47.962	IT1	2.90917	8	10.8985
Trial 1	M1-2	C-P	M	0:03:47.962-0:03:48.228	IT1	3.18276	7	13.6268
Trial 1	M1-2	C-P	M	0:03:48.228-0:03:48.494	IT1	2.15545	8	8.07486
Trial 1	M1-2	C-P	M	0:03:48.494-0:03:48.760	IT1	1.21169	8	4.5393
Trial 1	M1-2	C-P	M	0:03:48.760-0:03:49.026	IT1	1.30268	8	4.88014
Trial 1	M1-2	C-P	M	0:03:49.026-0:03:49.292	IT1	1.35857	8	5.08955
Trial 1	M1-2	C-P	M	0:03:49.292-0:03:49.558	IT1	2.88846	8	10.8209
Trial 1	M1-2	C-P	M	0:03:49.558-0:03:49.824	IT1	1.66513	8	6.23803
Trial 1	M1-2	C-P	M	0:03:49.824-0:03:50.090	IT1	0.723085	8	2.70885
Trial 1	M1-2	C-P	M	0:03:50.090-0:03:50.356	IT1	0.803351	8	3.00955
Trial 1	M1-2	C-P	M	0:03:50.356-0:03:50.622	IT1	0.740997	8	2.77596
Trial 1	M1-2	C-P	M	0:03:50.622-0:03:50.888	IT1	0.441917	8	1.65553
Trial 1	M1-2	C-P	M	0:03:50.888-0:03:51.154	IT1	0.504626	8	1.89046
Trial 1	M1-2	C-P	M	0:03:51.154-0:03:51.420	IT1	1.03402	8	3.87372
Trial 1	M1-2	C-P	M	0:03:51.420-0:03:51.686	IT1	1.58358	8	5.93246
Trial 1	M1-2	C-P	M	0:03:51.686-0:03:51.952	IT1	1.03453	8	3.87563
Trial 1	M1-2	C-P	M	0:03:51.952-0:03:52.218	IT1	0.771575	8	2.89051
Trial 1	M1-2	C-P	M	0:03:52.218-0:03:52.484	IT1	2.89634	8	10.8504
Trial 1	M1-2	C-P	M	0:03:52.484-0:03:52.750	IT1	1.55257	8	5.81632
Trial 1	M1-2	C-P	M	0:03:52.750-0:03:53.016	IT1	4.28937	8	16.069
Trial 1	M1-2	C-P	M	0:03:53.016-0:03:53.282	IT1	4.02604	8	15.0826
Trial 1	M1-2	C-P	M	0:03:53.282-0:03:53.548	IT1	4.65711	8	17.4467
Trial 1	M1-2	C-P	M	0:03:53.548-0:03:53.814	IT1	5.32553	8	19.9508
Trial 1	M1-2	C-P	M	0:03:53.814-0:03:54.080	IT1	2.34103	8	8.77007
Trial 1	M1-2	C-P	M	0:03:54.080-0:03:54.346	IT1	1.56385	8	5.85856
Trial 1	M1-2	C-P	M	0:03:54.346-0:03:54.612	IT1	2.2874	8	8.56917
Trial 1	M1-2	C-P	M	0:03:54.612-0:03:54.878	IT1	0.637598	8	2.3886
Trial 1	M1-2	C-P	M	0:03:54.878-0:03:55.144	IT1	0.506329	8	1.89684
Trial 1	M1-2	C-P	M	0:03:55.144-0:03:55.410	IT1	0.922912	8	3.45746
Trial 1	M1-2	C-P	M	0:03:55.410-0:03:55.676	IT1	1.98834	8	7.4488
Trial 1	M1-2	C-P	M	0:03:55.676-0:03:55.942	IT1	1.28912	8	4.82936
Trial 1	M1-2	C-P	M	0:03:55.942-0:03:56.208	IT1	0.675262	8	2.5297
Trial 1	M1-2	C-P	M	0:03:56.208-0:03:56.474	IT1	0.754976	8	2.82834
Trial 1	M1-2	C-P	M	0:03:56.474-0:03:56.740	IT1	0.668212	8	2.50329
Trial 1	M1-2	C-P	M	0:03:56.740-0:03:57.006	IT1	1.04031	8	3.89727
Trial 1	M1-2	C-P	M	0:03:57.006-0:03:57.272	IT1	0.4817	8	1.80458
Trial 1	M1-2	C-P	M	0:03:57.272-0:03:57.538	IT1	0.667259	8	2.49972
Trial 1	M1-2	C-P	M	0:03:57.538-0:03:57.804	IT1	1.11159	7	4.75918
Trial 1	M1-2	C-P	M	0:03:57.804-0:03:58.070	IT1	0.502136	8	1.88114
Trial 1	M1-2	C-P	M	0:03:58.070-0:03:58.336	IT1	0.450469	8	1.68757
Trial 1	M1-2	C-P	M	0:03:58.336-0:03:58.602	IT1	0.34406	8	1.28893
Trial 1	M1-2	C-P	M	0:03:58.602-0:03:58.868	IT1	0.803178	8	3.0089
Trial 1	M1-2	C-P	M	0:03:58.868-0:03:59.134	IT1	2.07654	8	7.77925
Trial 1	M1-2	C-P	M	0:03:59.134-0:03:59.400	IT1	1.70098	8	6.37233
Trial 1	M1-2	C-P	M	0:03:59.400-0:03:59.666	IT1	1.20473	8	4.51323
Trial 1	M1-2	C-P	M	0:03:59.666-0:03:59.932	IT1	0.618036	8	2.31531
Trial 1	M1-2	C-P	M	0:03:59.932-0:04:00.198	IT1	1.03767	8	3.88736
Trial 1	M1-2	C-P	M	0:04:00.198-0:04:00.464	IT1	2.34444	8	8.78284
Trial 1	M1-2	C-P	M	0:04:00.464-0:04:00.730	IT1	4.73816	8	17.7503
Trial 1	M1-2	C-P	M	0:04:00.730-0:04:00.996	IT1	3.36644	8	12.6115
Trial 1	M1-2	C-P	M	0:04:00.996-0:04:01.262	IT1	2.69716	8	10.1042
Trial 1	M1-2	C-P	M	0:04:01.262-0:04:01.528	IT1	1.45107	8	5.43607
Trial 1	M1-2	C-P	M	0:04:01.528-0:04:01.794	IT1	1.03271	8	3.86881
Trial 1	M1-2	C-P	M	0:04:01.794-0:04:02.060	IT1	1.10113	8	4.12514
Trial 1	M1-2	C-P	M	0:04:02.060-0:04:02.326	IT1	1.13685	8	4.25895
Trial 1	M1-2	C-P	M	0:04:02.326-0:04:02.592	IT1	1.38485	8	5.18797
Trial 1	M1-2	C-P	M	0:04:02.592-0:04:02.858	IT1	1.79851	8	6.73766
Trial 1	M1-2	C-P	M	0:04:02.858-0:04:03.124	IT1	0.525587	8	1.96897
Trial 1	M1-2	C-P	M	0:04:03.124-0:04:03.390	IT1	0.417292	8	1.56328
Trial 1	M1-2	C-P	M	0:04:03.390-0:04:03.656	IT1	0.666262	8	2.49598
Trial 1	M1-2	C-P	M	0:04:03.656-0:04:03.922	IT1	0.839799	8	3.1461
Trial 1	M1-2	C-P	M	0:04:03.922-0:04:04.188	IT1	1.13206	8	4.24097
Trial 1	M1-2	C-P	M	0:04:04.188-0:04:04.454	IT1	1.39146	8	5.21276
Trial 1	M1-2	C-P	M	0:04:04.454-0:04:04.720	IT1	3.48518	8	13.0564
Trial 1	M1-2	C-P	M	0:04:04.720-0:04:04.986	IT1	1.88143	8	7.04831
Trial 1	M1-2	C-P	M	0:04:04.986-0:04:05.252	IT1	3.38622	8	12.6856
Trial 1	M1-2	C-P	M	0:04:05.252-0:04:05.518	IT1	3.44103	8	12.891
Trial 1	M1-2	C-P	M	0:04:05.518-0:04:05.784	IT1	2.25715	8	8.45585
Trial 1	M1-2	C-P	M	0:04:05.784-0:04:06.050	IT1	1.03925	8	3.89329
Trial 1	M1-2	C-P	M	0:04:06.050-0:04:06.316	IT1	0.550359	8	2.06177
Trial 1	M1-2	C-P	M	0:04:06.316-0:04:06.582	IT1	0.632827	8	2.37071
Trial 1	M1-2	C-P	M	0:04:06.582-0:04:06.848	IT1	1.81515	8	6.8
Trial 1	M1-2	C-P	M	0:04:06.848-0:04:07.114	IT1	1.24001	8	4.64536
Trial 1	M1-2	C-P	M	0:04:07.114-0:04:07.380	IT1	0.305103	7	1.30627
Trial 1	M1-2	C-P	M	0:04:07.380-0:04:07.646	IT1	0.868731	8	3.25448
Trial 1	M1-2	C-P	M	0:04:07.646-0:04:07.912	IT1	0.694876	8	2.60318
Trial 1	M1-2	C-P	M	0:04:07.912-0:04:08.178	IT1	0.572656	8	2.14532
Trial 1	M1-2	C-P	M	0:04:08.178-0:04:08.444	IT1	0.272677	8	1.02152
Trial 1	M1-2	C-P	M	0:04:08.444-0:04:08.710	IT1	0.996765	8	3.73412
Trial 1	M1-2	C-P	M	0:04:08.710-0:04:08.976	IT1	0.99193	8	3.71603
Trial 1	M1-2	C-P	M	0:04:08.976-0:04:09.242	IT1	0.5427	8	2.03309
Trial 1	M1-2	C-P	M	0:04:09.242-0:04:09.508	IT1	0.91923	8	3.44369
Trial 1	M1-2	C-P	M	0:04:09.508-0:04:09.774	IT1	1.56405	8	5.85932
Trial 1	M1-2	C-P	M	0:04:09.774-0:04:10.040	IT1	0.706753	8	2.64767
Trial 1	M1-2	C-P	M	0:04:10.040-0:04:10.306	IT1	0.992311	8	3.71744
Trial 1	M1-2	C-P	M	0:04:10.306-0:04:10.572	IT1	1.71478	8	6.42399
Trial 1	M1-2	C-P	M	0:04:10.572-0:04:10.838	IT1	1.77114	8	6.63523
Trial 1	M1-2	C-P	M	0:04:10.838-0:04:11.104	IT1	3.28524	8	12.3073
Trial 1	M1-2	C-P	M	0:04:11.104-0:04:11.370	IT1	0.852951	8	3.19537
Trial 1	M1-2	C-P	M	0:04:11.370-0:04:11.636	IT1	0.479655	8	1.79692
Trial 1	M1-2	C-P	M	0:04:11.636-0:04:11.902	IT1	0.305047	8	1.14278
Trial 1	M1-2	C-P	M	0:04:11.902-0:04:12.168	IT1	0.471814	8	1.76756
Trial 1	M1-2	C-P	M	0:04:12.168-0:04:12.434	IT1	0.363783	8	1.36282
Trial 1	M1-2	C-P	M	0:04:12.434-0:04:12.700	IT1	0.171404	8	0.642119
Trial 1	M1-2	C-P	M	0:04:12.700-0:04:12.966	IT1	0.704528	8	2.63933
Trial 1	M1-2	C-P	M	0:04:12.966-0:04:13.232	IT1	0.758544	8	2.84168
Trial 1	M1-2	C-P	M	0:04:13.232-0:04:13.498	IT1	3.46869	8	12.9946
Trial 1	M1-2	C-P	M	0:04:13.498-0:04:13.764	IT1	3.32735	8	12.465
Trial 1	M1-2	C-P	M	0:04:13.764-0:04:14.030	IT1	2.85406	8	10.692
Trial 1	M1-2	C-P	M	0:04:14.030-0:04:14.296	IT1	1.24763	8	4.67394
Trial 1	M1-2	C-P	M	0:04:14.296-0:04:14.562	IT1	0.353673	8	1.32494
Trial 1	M1-2	C-P	M	0:04:14.562-0:04:14.828	IT1	2.20623	8	8.26508
Trial 1	M1-2	C-P	M	0:04:14.828-0:04:15.094	IT1	2.52822	8	9.47133
Trial 1	M1-2	C-P	M	0:04:15.094-0:04:15.360	IT1	0.941415	8	3.52675
Trial 1	M1-2	C-P	M	0:04:15.360-0:04:15.626	IT1	0.993401	8	3.72152
Trial 1	M1-2	C-P	M	0:04:15.626-0:04:15.892	IT1	1.09886	8	4.11661
Trial 1	M1-2	C-P	M	0:04:15.892-0:04:16.158	IT1	1.70374	8	6.38263
Trial 1	M1-2	C-P	M	0:04:16.158-0:04:16.424	IT1	2.56588	8	9.61239
Trial 1	M1-2	C-P	M	0:04:16.424-0:04:16.690	IT1	2.38427	7	10.2081
Trial 1	M1-2	C-P	M	0:04:16.690-0:04:16.956	IT1	1.58788	8	5.94854
Trial 1	M1-2	C-P	M	0:04:16.956-0:04:17.222	IT1	1.62363	8	6.08256
Trial 1	M1-2	C-P	M	0:04:17.222-0:04:17.488	IT1	2.04547	8	7.66283
Trial 1	M1-2	C-P	M	0:04:17.488-0:04:17.754	IT1	1.22207	8	4.57819
Trial 1	M1-2	C-P	M	0:04:17.754-0:04:18.020	IT1	2.46921	8	9.25025
Trial 1	M1-2	C-P	M	0:04:18.020-0:04:18.286	IT1	0.954245	8	3.57484
Trial 1	M1-2	C-P	M	0:04:18.286-0:04:18.552	IT1	0.837257	8	3.13659
Trial 1	M1-2	C-P	M	0:04:18.552-0:04:18.818	IT1	1.73527	8	6.50077
Trial 1	M1-2	C-P	M	0:04:18.818-0:04:19.084	IT1	1.58023	8	5.91995
Trial 1	M1-2	C-P	M	0:04:19.084-0:04:19.350	IT1	4.96829	8	18.6124
Trial 1	M1-2	C-P	M	0:04:19.350-0:04:19.616	IT1	3.61903	8	13.5578
Trial 1	M1-2	C-P	M	0:04:19.616-0:04:19.882	IT1	5.36631	8	20.1037
Trial 1	M1-2	C-P	M	0:04:19.882-0:04:20.148	IT1	4.34017	8	16.2593
Trial 1	M1-2	C-P	M	0:04:20.148-0:04:20.414	IT1	3.07632	8	11.5246
Trial 1	M1-2	C-P	M	0:04:20.414-0:04:20.680	IT1	1.31353	8	4.92081
Trial 1	M1-2	C-P	M	0:04:20.680-0:04:20.946	IT1	1.16227	8	4.35417
Trial 1	M1-2	C-P	M	0:04:20.946-0:04:21.212	IT1	1.18385	8	4.43502
Trial 1	M1-2	C-P	M	0:04:21.212-0:04:21.478	IT1	0.714649	8	2.67725
Trial 1	M1-2	C-P	M	0:04:21.478-0:04:21.744	IT1	1.69976	8	6.36773
Trial 1	M1-2	C-P	M	0:04:21.744-0:04:22.010	IT1	2.46995	8	9.25306
Trial 1	M1-2	C-P	M	0:04:22.010-0:04:22.276	IT1	1.81618	8	6.80386
Trial 1	M1-2	C-P	M	0:04:22.276-0:04:22.542	IT1	1.39788	8	5.23677
Trial 1	M1-2	C-P	M	0:04:22.542-0:04:22.808	IT1	0.423524	8	1.58662
Trial 1	M1-2	C-P	M	0:04:22.808-0:04:23.074	IT1	0.999398	8	3.74402
Trial 1	M1-2	C-P	M	0:04:23.074-0:04:23.340	IT1	1.52994	8	5.73158
Trial 1	M1-2	C-P	M	0:04:23.340-0:04:23.606	IT1	1.12946	8	4.23121
Trial 1	M1-2	C-P	M	0:04:23.606-0:04:23.872	IT1	0.898738	8	3.36689
Trial 1	M1-2	C-P	M	0:04:23.872-0:04:24.138	IT1	0.688901	8	2.58079
Trial 1	M1-2	C-P	M	0:04:24.138-0:04:24.404	IT1	0.250599	8	0.938803
Trial 1	M1-2	C-P	M	0:04:24.404-0:04:24.670	IT1	0.325476	8	1.21932
Trial 1	M1-2	C-P	M	0:04:24.670-0:04:24.936	IT1	0.598335	8	2.2415
Trial 1	M1-2	C-P	M	0:04:24.936-0:04:25.202	IT1	3.53257	8	13.2338
Trial 1	M1-2	C-P	M	0:04:25.202-0:04:25.468	IT1	1.13326	8	4.24549
Trial 1	M1-2	C-P	M	0:04:25.468-0:04:25.734	IT1	0.621269	8	2.32742
Trial 1	M1-2	C-P	M	0:04:25.734-0:04:26.000	IT1	0.389846	8	1.46046
Trial 1	M1-2	C-P	M	0:04:26.000-0:04:26.266	IT1	0.372108	7	1.59316
Trial 1	M1-2	C-P	M	0:04:26.266-0:04:26.532	IT1	0.0861641	8	0.322791
Trial 1	M1-2	C-P	M	0:04:26.532-0:04:26.798	IT1	0.174196	8	0.65258
Trial 1	M1-2	C-P	M	0:04:26.798-0:04:27.064	IT1	0.127553	8	0.477841
Trial 1	M1-2	C-P	M	0:04:27.064-0:04:27.330	IT1	0.636134	8	2.38312
Trial 1	M1-2	C-P	M	0:04:27.330-0:04:27.596	IT1	0.322134	8	1.20679
Trial 1	M1-2	C-P	M	0:04:27.596-0:04:27.862	IT1	0.121562	8	0.455403
Trial 1	M1-2	C-P	M	0:04:27.862-0:04:28.128	IT1	0.136655	8	0.511939
Trial 1	M1-2	C-P	M	0:04:28.128-0:04:28.394	IT1	0.488602	8	1.83042
Trial 1	M1-2	C-P	M	0:04:28.394-0:04:28.660	IT1	2.50108	8	9.36967
Trial 1	M1-2	C-P	M	0:04:28.660-0:04:28.926	IT1	2.57546	8	9.64831
Trial 1	M1-2	C-P	M	0:04:28.926-0:04:29.192	IT1	2.1308	8	7.98254
Trial 1	M1-2	C-P	M	0:04:29.192-0:04:29.458	IT1	3.07978	8	11.5376
Trial 1	M1-2	C-P	M	0:04:29.458-0:04:29.724	IT1	2.97337	8	11.139
Trial 1	M1-2	C-P	M	0:04:29.724-0:04:29.990	IT1	3.24647	8	12.1621
Trial 1	M1-2	C-P	M	0:04:29.990-0:04:30.256	IT1	1.29436	8	4.84902
Trial 1	M1-2	C-P	M	0:04:30.256-0:04:30.522	IT1	1.88916	8	7.07724
Trial 1	M1-2	C-P	M	0:04:30.522-0:04:30.788	IT1	1.09696	8	4.10947
Trial 1	M1-2	C-P	M	0:04:30.788-0:04:31.054	IT1	0.642681	8	2.40764
Trial 1	M1-2	C-P	M	0:04:31.054-0:04:31.320	IT1	0.376386	8	1.41004
Trial 1	M1-2	C-P	M	0:04:31.320-0:04:31.586	IT1	0.194212	8	0.727566
Trial 1	M1-2	C-P	M	0:04:31.586-0:04:31.852	IT1	0.407125	8	1.5252
Trial 1	M1-2	C-P	M	0:04:31.852-0:04:32.118	IT1	0.456154	8	1.70886
Trial 1	M1-2	C-P	M	0:04:32.118-0:04:32.384	IT1	0.277322	8	1.03892
Trial 1	M1-2	C-P	M	0:04:32.384-0:04:32.650	IT1	0.239034	8	0.895483
Trial 1	M1-2	C-P	M	0:04:32.650-0:04:32.916	IT1	1.08659	8	4.07062
Trial 1	M1-2	C-P	M	0:04:32.916-0:04:33.182	IT1	2.96476	8	11.1068
Trial 1	M1-2	C-P	M	0:04:33.182-0:04:33.448	IT1	1.88912	8	7.07709
Trial 1	M1-2	C-P	M	0:04:33.448-0:04:33.714	IT1	1.27523	8	4.77732
Trial 1	M1-2	C-P	M	0:04:33.714-0:04:33.980	IT1	0.97966	8	3.67004
Trial 1	M1-2	C-P	M	0:04:33.980-0:04:34.246	IT1	0.232322	8	0.870337
Trial 1	M1-2	C-P	M	0:04:34.246-0:04:34.512	IT1	0.484894	8	1.81654
Trial 1	M1-2	C-P	M	0:04:34.512-0:04:34.778	IT1	0.703614	8	2.63591
Trial 1	M1-2	C-P	M	0:04:34.778-0:04:35.044	IT1	0.165146	8	0.618676
Trial 1	M1-2	C-P	M	0:04:35.044-0:04:35.310	IT1	0.279733	8	1.04795
Trial 1	M1-2	C-P	M	0:04:35.310-0:04:35.576	IT1	0.249675	8	0.935341
Trial 1	M1-2	C-P	M	0:04:35.576-0:04:35.842	IT1	0.391697	7	1.67701
Trial 1	M1-2	C-P	M	0:04:35.842-0:04:36.108	IT1	0.585218	8	2.19238
Trial 1	M1-2	C-P	M	0:04:36.108-0:04:36.374	IT1	0.589227	8	2.20738
Trial 1	M1-2	C-P	M	0:04:36.374-0:04:36.640	IT1	0.489659	8	1.83439
Trial 1	M1-2	C-P	M	0:04:36.640-0:04:36.906	IT1	1.29846	8	4.86435
Trial 1	M1-2	C-P	M	0:04:36.906-0:04:37.172	IT1	0.637322	8	2.38757
Trial 1	M1-2	C-P	M	0:04:37.172-0:04:37.438	IT1	1.31275	8	4.91789
Trial 1	M1-2	C-P	M	0:04:37.438-0:04:37.704	IT1	0.859014	8	3.21808
Trial 1	M1-2	C-P	M	0:04:37.704-0:04:37.970	IT1	0.360224	8	1.34948
Trial 1	M1-2	C-P	M	0:04:37.970-0:04:38.236	IT1	0.501716	8	1.87956
Trial 1	M1-2	C-P	M	0:04:38.236-0:04:38.502	IT1	1.54997	8	5.80655
Trial 1	M1-2	C-P	M	0:04:38.502-0:04:38.768	IT1	1.73907	8	6.515
Trial 1	M1-2	C-P	M	0:04:38.768-0:04:39.034	IT1	0.709406	8	2.6576
Trial 1	M1-2	C-P	M	0:04:39.034-0:04:39.300	IT1	1.19281	8	4.46856
Trial 1	M1-2	C-P	M	0:04:39.300-0:04:39.566	IT1	0.770968	8	2.88825
Trial 1	M1-2	C-P	M	0:04:39.566-0:04:39.832	IT1	0.594066	8	2.22552
Trial 1	M1-2	C-P	M	0:04:39.832-0:04:40.098	IT1	0.621817	8	2.32947
Trial 1	M1-2	C-P	M	0:04:40.098-0:04:40.364	IT1	0.984797	8	3.68928
Trial 1	M1-2	C-P	M	0:04:40.364-0:04:40.630	IT1	2.25237	8	8.43793
Trial 1	M1-2	C-P	M	0:04:40.630-0:04:40.896	IT1	0.6828	8	2.55794
Trial 1	M1-2	C-P	M	0:04:40.896-0:04:41.162	IT1	0.48067	8	1.8007
Trial 1	M1-2	C-P	M	0:04:41.162-0:04:41.428	IT1	0.119279	8	0.44685
Trial 1	M1-2	C-P	M	0:04:41.428-0:04:41.694	IT1	0.691122	8	2.58912
Trial 1	M1-2	C-P	M	0:04:41.694-0:04:41.960	IT1	2.06759	8	7.7457
Trial 1	M1-2	C-P	M	0:04:41.960-0:04:42.226	IT1	2.64118	8	9.89453
Trial 1	M1-2	C-P	M	0:04:42.226-0:04:42.492	IT1	2.82615	8	10.5874
Trial 1	M1-2	C-P	M	0:04:42.492-0:04:42.758	IT1	0.988674	8	3.70383
Trial 1	M1-2	C-P	M	0:04:42.758-0:04:43.024	IT1	1.08499	8	4.06465
Trial 1	M1-2	C-P	M	0:04:43.024-0:04:43.290	IT1	1.08625	8	4.06938
Trial 1	M1-2	C-P	M	0:04:43.290-0:04:43.556	IT1	0.979808	8	3.67062
Trial 1	M1-2	C-P	M	0:04:43.556-0:04:43.822	IT1	1.99168	8	7.4613
Trial 1	M1-2	C-P	M	0:04:43.822-0:04:44.088	IT1	0.385032	8	1.44242
Trial 1	M1-2	C-P	M	0:04:44.088-0:04:44.354	IT1	0.242344	8	0.907879
Trial 1	M1-2	C-P	M	0:04:44.354-0:04:44.620	IT1	1.02351	8	3.83429
Trial 1	M1-2	C-P	M	0:04:44.620-0:04:44.886	IT1	2.5726	8	9.63769
Trial 1	M1-2	C-P	M	0:04:44.886-0:04:45.152	IT1	0.927879	8	3.47606
Trial 1	M1-2	C-P	M	0:04:45.152-0:04:45.418	IT1	1.05386	7	4.51199
Trial 1	M1-2	C-P	M	0:04:45.418-0:04:45.684	IT1	1.22399	8	4.58537
Trial 1	M1-2	C-P	M	0:04:45.684-0:04:45.950	IT1	1.89836	8	7.1117
Trial 1	M1-2	C-P	M	0:04:45.950-0:04:46.216	IT1	0.432739	8	1.62115
Trial 1	M1-2	C-P	M	0:04:46.216-0:04:46.482	IT1	0.491864	8	1.84266
Trial 1	M1-2	C-P	M	0:04:46.482-0:04:46.748	IT1	0.384363	8	1.43993
Trial 1	M1-2	C-P	M	0:04:46.748-0:04:47.014	IT1	0.0808222	8	0.302783
Trial 1	M1-2	C-P	M	0:04:47.014-0:04:47.280	IT1	0.287032	8	1.07529
Trial 1	M1-2	C-P	M	0:04:47.280-0:04:47.546	IT1	1.21455	8	4.55004
Trial 1	M1-2	C-P	M	0:04:47.546-0:04:47.812	IT1	1.6684	8	6.25021
Trial 1	M1-2	C-P	M	0:04:47.812-0:04:48.078	IT1	0.590936	8	2.21379
Trial 1	M1-2	C-P	M	0:04:48.078-0:04:48.344	IT1	2.48739	8	9.3184
Trial 1	M1-2	C-P	M	0:04:48.344-0:04:48.610	IT1	1.63622	8	6.12967
Trial 1	M1-2	C-P	M	0:04:48.610-0:04:48.876	IT1	2.15839	8	8.0859
Trial 1	M1-2	C-P	M	0:04:48.876-0:04:49.142	IT1	1.06426	8	3.98695
Trial 1	M1-2	C-P	M	0:04:49.142-0:04:49.408	IT1	0.605955	8	2.27005
Trial 1	M1-2	C-P	M	0:04:49.408-0:04:49.674	IT1	0.850857	8	3.18753
Trial 1	M1-2	C-P	M	0:04:49.674-0:04:49.940	IT1	0.808243	8	3.02789
Trial 1	M1-2	C-P	M	0:04:49.940-0:04:50.206	IT1	0.52056	8	1.95015
Trial 1	M1-2	C-P	M	0:04:50.206-0:04:50.472	IT1	0.132654	8	0.496951
Trial 1	M1-2	C-P	M	0:04:50.472-0:04:50.738	IT1	0.774069	8	2.89983
Trial 1	M1-2	C-P	M	0:04:50.738-0:04:51.004	IT1	1.30608	8	4.8929
Trial 1	M1-2	C-P	M	0:04:51.004-0:04:51.270	IT1	1.14675	8	4.296
Trial 1	M1-2	C-P	M	0:04:51.270-0:04:51.536	IT1	1.08138	8	4.05114
Trial 1	M1-2	C-P	M	0:04:51.536-0:04:51.802	IT1	2.84392	8	10.654
Trial 1	M1-2	C-P	M	0:04:51.802-0:04:52.068	IT1	0.972872	8	3.64463
Trial 1	M1-2	C-P	M	0:04:52.068-0:04:52.334	IT1	0.59535	8	2.23034
Trial 1	M1-2	C-P	M	0:04:52.334-0:04:52.600	IT1	0.456881	8	1.71158
Trial 1	M1-2	C-P	M	0:04:52.600-0:04:52.866	IT1	0.199968	8	0.749138
Trial 1	M1-2	C-P	M	0:04:52.866-0:04:53.132	IT1	1.02895	8	3.8547
Trial 1	M1-2	C-P	M	0:04:53.132-0:04:53.398	IT1	1.1985	8	4.48985
Trial 1	M1-2	C-P	M	0:04:53.398-0:04:53.664	IT1	0.889154	8	3.33099
Trial 1	M1-2	C-P	M	0:04:53.664-0:04:53.930	IT1	0.817088	8	3.06102
Trial 1	M1-2	C-P	M	0:04:53.930-0:04:54.196	IT1	0.329053	8	1.23272
Trial 1	M1-2	C-P	M	0:04:54.196-0:04:54.462	IT1	1.07297	8	4.01958
Trial 1	M1-2	C-P	M	0:04:54.462-0:04:54.728	IT1	0.48696	7	2.08488
Trial 1	M1-2	C-P	M	0:04:54.728-0:04:54.994	IT1	0.523433	8	1.9609
Trial 1	M1-2	C-P	M	0:04:54.994-0:04:55.260	IT1	0.306959	8	1.14995
Trial 1	M1-2	C-P	M	0:04:55.260-0:04:55.526	IT1	0.346216	8	1.29701
Trial 1	M1-2	C-P	M	0:04:55.526-0:04:55.792	IT1	0.545024	8	2.0418
Trial 1	M1-2	C-P	M	0:04:55.792-0:04:56.058	IT1	0.752965	8	2.82079
Trial 1	M1-2	C-P	M	0:04:56.058-0:04:56.324	IT1	0.674718	8	2.52766
Trial 1	M1-2	C-P	M	0:04:56.324-0:04:56.590	IT1	0.0826431	8	0.309601
Trial 1	M1-2	C-P	M	0:04:56.590-0:04:56.856	IT1	1.29459	8	4.84985
Trial 1	M1-2	C-P	M	0:04:56.856-0:04:57.122	IT1	0.911418	8	3.4144
Trial 1	M1-2	C-P	M	0:04:57.122-0:04:57.388	IT1	0.934638	8	3.50137
Trial 1	M1-2	C-P	M	0:04:57.388-0:04:57.654	IT1	1.34076	8	5.02278
Trial 1	M1-2	C-P	M	0:04:57.654-0:04:57.920	IT1	1.74513	8	6.53769
Trial 1	M1-2	C-P	M	0:04:57.920-0:04:58.186	IT1	2.61732	8	9.8051
Trial 1	M1-2	C-P	M	0:04:58.186-0:04:58.452	IT1	0.550163	8	2.06105
Trial 1	M1-2	C-P	M	0:04:58.452-0:04:58.718	IT1	1.00819	8	3.77696
Trial 1	M1-2	C-P	M	0:04:58.718-0:04:58.984	IT1	0.703828	8	2.6367
Trial 1	M1-2	C-P	M	0:04:58.984-0:04:59.250	IT1	0.901169	8	3.37602
Trial 1	M1-2	C-P	M	0:04:59.250-0:04:59.516	IT1	1.30315	8	4.88189
Trial 1	M1-2	C-P	M	0:04:59.516-0:04:59.782	IT1	1.16731	8	4.37305
Trial 1	M1-2	C-P	M	0:04:59.782-0:05:00.048	IT1	1.67462	8	6.27358
Trial 1	M1-2	C-P	M	0:05:00.048-0:05:00.314	IT1	1.87026	8	7.00644
Trial 1	M1-2	C-P	M	0:05:00.314-0:05:00.580	IT1	1.1574	8	4.33593
Trial 1	M1-2	C-P	M	0:05:00.580-0:05:00.846	IT1	0.781462	8	2.92754
Trial 1	M1-2	C-P	M	0:05:00.846-0:05:01.112	IT1	1.06945	8	4.00643
Trial 1	M1-2	C-P	M	0:05:01.112-0:05:01.378	IT1	2.18093	8	8.17027
Trial 1	M1-2	C-P	M	0:05:01.378-0:05:01.644	IT1	1.5836	8	5.93257
Trial 1	M1-2	C-P	M	0:05:01.644-0:05:01.910	IT1	1.12856	8	4.22788
Trial 1	M1-2	C-P	M	0:05:01.910-0:05:02.176	IT1	2.95151	8	11.0571
Trial 1	M1-2	C-P	M	0:05:02.176-0:05:02.442	IT1	5.24773	8	19.6594
Trial 1	M1-2	C-P	M	0:05:02.442-0:05:02.708	IT1	2.37774	8	8.90756
Trial 1	M1-2	C-P	M	0:05:02.708-0:05:02.974	IT1	1.81855	8	6.81273
Trial 1	M1-2	C-P	M	0:05:02.974-0:05:03.240	IT1	0.739443	8	2.77015
Trial 1	M1-2	C-P	M	0:05:03.240-0:05:03.506	IT1	1.54206	8	5.77694
Trial 1	M1-2	C-P	M	0:05:03.506-0:05:03.772	IT1	1.94501	8	7.28656
Trial 1	M1-2	C-P	M	0:05:03.772-0:05:04.038	IT1	3.73991	8	14.0106
Trial 1	M1-2	C-P	M	0:05:04.038-0:05:04.304	IT1	0.773898	7	3.31338
Trial 1	M1-2	C-P	M	0:05:04.304-0:05:04.570	IT1	0.966338	8	3.62012
Trial 1	M1-2	C-P	M	0:05:04.570-0:05:04.836	IT1	0.803723	8	3.01095
Trial 1	M1-2	C-P	M	0:05:04.836-0:05:05.102	IT1	1.51771	8	5.68574
Trial 1	M1-2	C-P	M	0:05:05.102-0:05:05.368	IT1	1.85405	8	6.94572
Trial 1	M1-2	C-P	M	0:05:05.368-0:05:05.634	IT1	3.22445	8	12.0796
Trial 1	M1-2	C-P	M	0:05:05.634-0:05:05.900	IT1	1.58441	8	5.93558
Trial 1	M1-2	C-P	M	0:05:05.900-0:05:06.166	IT1	1.33209	8	4.99034
Trial 1	M1-2	C-P	M	0:05:06.166-0:05:06.432	IT1	0.607173	8	2.27462
Trial 1	M1-2	C-P	M	0:05:06.432-0:05:06.698	IT1	0.196488	8	0.736093
Trial 1	M1-2	C-P	M	0:05:06.698-0:05:06.964	IT1	0.439785	8	1.64755
Trial 1	M1-2	C-P	M	0:05:06.964-0:05:07.230	IT1	3.32037	8	12.439
Trial 1	M1-2	C-P	M	0:05:07.230-0:05:07.496	IT1	2.11355	8	7.91787
Trial 1	M1-2	C-P	M	0:05:07.496-0:05:07.762	IT1	1.10264	8	4.13075
Trial 1	M1-2	C-P	M	0:05:07.762-0:05:08.028	IT1	3.78495	8	14.1794
Trial 1	M1-2	C-P	M	0:05:08.028-0:05:08.294	IT1	2.51503	8	9.42189
Trial 1	M1-2	C-P	M	0:05:08.294-0:05:08.560	IT1	1.27335	8	4.77029
Trial 1	M1-2	C-P	M	0:05:08.560-0:05:08.826	IT1	0.502674	8	1.88314
Trial 1	M1-2	C-P	M	0:05:08.826-0:05:09.092	IT1	0.124849	8	0.467715
Trial 1	M1-2	C-P	M	0:05:09.092-0:05:09.358	IT1	0.206473	8	0.773497
Trial 1	M1-2	C-P	M	0:05:09.358-0:05:09.624	IT1	0.624836	8	2.34079
Trial 1	M1-2	C-P	M	0:05:09.624-0:05:09.890	IT1	0.795817	8	2.98134
Trial 1	M1-2	C-P	M	0:05:09.890-0:05:10.156	IT1	0.561093	8	2.10199
Trial 1	M1-2	C-P	M	0:05:10.156-0:05:10.422	IT1	0.949448	8	3.55689
Trial 1	M1-2	C-P	M	0:05:10.422-0:05:10.688	IT1	0.861148	8	3.22607
Trial 1	M1-2	C-P	M	0:05:10.688-0:05:10.954	IT1	0.78296	8	2.93316
Trial 1	M1-2	C-P	M	0:05:10.954-0:05:11.220	IT1	0.942089	8	3.52933
Trial 1	M1-2	C-P	M	0:05:11.220-0:05:11.486	IT1	0.467936	8	1.75299
Trial 1	M1-2	C-P	M	0:05:11.486-0:05:11.752	IT1	1.05352	8	3.94675
Trial 1	M1-2	C-P	M	0:05:11.752-0:05:12.018	IT1	0.639506	8	2.39575
Trial 1	M1-2	C-P	M	0:05:12.018-0:05:12.284	IT1	1.43525	8	5.37676
Trial 1	M1-2	C-P	M	0:05:12.284-0:05:12.550	IT1	0.677514	8	2.53812
Trial 1	M1-2	C-P	M	0:05:12.550-0:05:12.816	IT1	0.404908	8	1.51688
Trial 1	M1-2	C-P	M	0:05:12.816-0:05:13.082	IT1	0.186529	8	0.698779
Trial 1	M1-2	C-P	M	0:05:13.082-0:05:13.348	IT1	0.124931	8	0.468024
Trial 1	M1-2	C-P	M	0:05:13.348-0:05:13.614	IT1	1.63365	8	6.12007
Trial 1	M1-2	C-P	M	0:05:13.614-0:05:13.880	IT1	0.543797	7	2.32823
Trial 1	M1-2	C-P	M	0:05:13.880-0:05:14.146	IT1	1.14207	8	4.27851
Trial 1	M1-2	C-P	M	0:05:14.146-0:05:14.412	IT1	0.952382	8	3.56786
Trial 1	M1-2	C-P	M	0:05:14.412-0:05:14.678	IT1	0.863238	8	3.2339
Trial 1	M1-2	C-P	M	0:05:14.678-0:05:14.944	IT1	0.955082	8	3.57798
Trial 1	M1-2	C-P	M	0:05:14.944-0:05:15.210	IT1	0.3774	8	1.41383
Trial 1	M1-2	C-P	M	0:05:15.210-0:05:15.476	IT1	0.626986	8	2.34885
Trial 1	M1-2	C-P	M	0:05:15.476-0:05:15.742	IT1	1.27711	8	4.78438
Trial 1	M1-2	C-P	M	0:05:15.742-0:05:16.008	IT1	1.60448	8	6.01078
Trial 1	M1-2	C-P	M	0:05:16.008-0:05:16.274	IT1	1.34811	8	5.05037
Trial 1	M1-2	C-P	M	0:05:16.274-0:05:16.540	IT1	1.3511	8	5.06157
Trial 1	M1-2	C-P	M	0:05:16.540-0:05:16.806	IT1	0.637293	8	2.38746
Trial 1	M1-2	C-P	M	0:05:16.806-0:05:17.072	IT1	0.718352	8	2.69111
Trial 1	M1-2	C-P	M	0:05:17.072-0:05:17.338	IT1	2.04313	8	7.65405
Trial 1	M1-2	C-P	M	0:05:17.338-0:05:17.604	IT1	1.29941	8	4.86791
Trial 1	M1-2	C-P	M	0:05:17.604-0:05:17.870	IT1	1.3169	8	4.93345
Trial 1	M1-2	C-P	M	0:05:17.870-0:05:18.136	IT1	3.05572	8	11.4475
Trial 1	M1-2	C-P	M	0:05:18.136-0:05:18.402	IT1	0.827196	8	3.09887
Trial 1	M1-2	C-P	M	0:05:18.402-0:05:18.668	IT1	4.28977	8	16.0705
Trial 1	M1-2	C-P	M	0:05:18.668-0:05:18.934	IT1	2.43769	8	9.13224
Trial 1	M1-2	C-P	M	0:05:18.934-0:05:19.200	IT1	2.90737	8	10.8917
Trial 1	M1-2	C-P	M	0:05:19.200-0:05:19.466	IT1	2.04364	8	7.656
Trial 1	M1-2	C-P	M	0:05:19.466-0:05:19.732	IT1	1.58716	8	5.94592
Trial 1	M1-2	C-P	M	0:05:19.732-0:05:19.998	IT1	1.74201	8	6.52603
Trial 1	M1-2	C-P	M	0:05:19.998-0:05:20.264	IT1	1.45115	8	5.43637
Trial 1	M1-2	C-P	M	0:05:20.264-0:05:20.530	IT1	1.4234	8	5.33241
Trial 1	M1-2	C-P	M	0:05:20.530-0:05:20.796	IT1	0.961442	8	3.6018
Trial 1	M1-2	C-P	M	0:05:20.796-0:05:21.062	IT1	1.02507	8	3.84015
Trial 1	M1-2	C-P	M	0:05:21.062-0:05:21.328	IT1	1.94805	8	7.29788
Trial 1	M1-2	C-P	M	0:05:21.328-0:05:21.594	IT1	0.880182	8	3.29739
Trial 1	M1-2	C-P	M	0:05:21.594-0:05:21.860	IT1	1.02639	8	3.84511
Trial 1	M1-2	C-P	M	0:05:21.860-0:05:22.126	IT1	2.23762	8	8.3827
Trial 1	M1-2	C-P	M	0:05:22.126-0:05:22.392	IT1	3.7049	8	13.8795
Trial 1	M1-2	C-P	M	0:05:22.392-0:05:22.658	IT1	1.49806	8	5.6121
Trial 1	M1-2	C-P	M	0:05:22.658-0:05:22.924	IT1	2.23675	8	8.37936
Trial 1	M1-2	C-P	M	0:05:22.924-0:05:23.190	IT1	0.703091	8	2.63394
Trial 1	M1-2	C-P	M	0:05:23.190-0:05:23.456	IT1	2.38299	7	10.2026
Trial 1	M1-2	C-P	M	0:05:23.456-0:05:23.722	IT1	1.80771	8	6.77214
Trial 1	M1-2	C-P	M	0:05:23.722-0:05:23.988	IT1	0.986101	8	3.69417
Trial 1	M1-2	C-P	M	0:05:23.988-0:05:24.254	IT1	1.0408	8	3.89907
Trial 1	M1-2	C-P	M	0:05:24.254-0:05:24.520	IT1	0.565609	8	2.11891
Trial 1	M1-2	C-P	M	0:05:24.520-0:05:24.786	IT1	0.196411	8	0.73581
Trial 1	M1-2	C-P	M	0:05:24.786-0:05:25.052	IT1	0.277086	8	1.03803
Trial 1	M1-2	C-P	M	0:05:25.052-0:05:25.318	IT1	0.331029	8	1.24011
Trial 1	M1-2	C-P	M	0:05:25.318-0:05:25.584	IT1	1.55866	8	5.83912
Trial 1	M1-2	C-P	M	0:05:25.584-0:05:25.850	IT1	1.99785	8	7.48443
Trial 1	M1-2	C-P	M	0:05:25.850-0:05:26.116	IT1	1.14729	8	4.29804
Trial 1	M1-2	C-P	M	0:05:26.116-0:05:26.382	IT1	1.08349	8	4.05903
Trial 1	M1-2	C-P	M	0:05:26.382-0:05:26.648	IT1	1.66184	8	6.22566
Trial 1	M1-2	C-P	M	0:05:26.648-0:05:26.914	IT1	0.420096	8	1.57378
Trial 1	M1-2	C-P	M	0:05:26.914-0:05:27.180	IT1	0.679067	8	2.54396
Trial 1	M1-2	C-P	M	0:05:27.180-0:05:27.446	IT1	0.418513	8	1.56786
Trial 1	M1-2	C-P	M	0:05:27.446-0:05:27.712	IT1	0.136951	8	0.513049
Trial 1	M1-2	C-P	M	0:05:27.712-0:05:27.978	IT1	0.140235	8	0.525354
Trial 1	M1-2	C-P	M	0:05:27.978-0:05:28.244	IT1	0.0854626	8	0.320164
Trial 1	M1-2	C-P	M	0:05:28.244-0:05:28.510	IT1	0.0662372	8	0.24814
Trial 1	M1-2	C-P	M	0:05:28.510-0:05:28.776	IT1	0.175747	8	0.658388
Trial 1	M1-2	C-P	M	0:05:28.776-0:05:29.042	IT1	0.193517	8	0.724965
Trial 1	M1-2	C-P	M	0:05:29.042-0:05:29.308	IT1	0.864233	8	3.23764
Trial 1	M1-2	C-P	M	0:05:29.308-0:05:29.574	IT1	0.900146	8	3.37218
Trial 1	M1-2	C-P	M	0:05:29.574-0:05:29.840	IT1	0.541192	8	2.02743
Trial 1	M1-2	C-P	M	0:05:29.840-0:05:30.106	IT1	0.769156	8	2.88145
Trial 1	M1-2	C-P	M	0:05:30.106-0:05:30.372	IT1	1.67622	8	6.27955
Trial 1	M1-2	C-P	M	0:05:30.372-0:05:30.638	IT1	1.12937	8	4.23088
Trial 1	M1-2	C-P	M	0:05:30.638-0:05:30.904	IT1	3.42326	8	12.8244
Trial 1	M1-2	C-P	M	0:05:30.904-0:05:31.170	IT1	3.9772	8	14.8996
Trial 1	M1-2	C-P	M	0:05:31.170-0:05:31.436	IT1	2.38653	8	8.94052
Trial 1	M1-2	C-P	M	0:05:31.436-0:05:31.702	IT1	0.922163	8	3.45466
Trial 1	M1-2	C-P	M	0:05:31.702-0:05:31.968	IT1	0.550999	8	2.06418
Trial 1	M1-2	C-P	M	0:05:31.968-0:05:32.234	IT1	0.394379	8	1.47744
Trial 1	M1-2	C-P	M	0:05:32.234-0:05:32.500	IT1	0.502996	8	1.88434
Trial 1	M1-2	C-P	M	0:05:32.500-0:05:32.766	IT1	0.203624	7	0.871799
Trial 1	M1-2	C-P	M	0:05:32.766-0:05:33.032	IT1	0.172438	8	0.645995
Trial 1	M1-2	C-P	M	0:05:33.032-0:05:33.298	IT1	0.0673804	8	0.252424
Trial 1	M1-2	C-P	M	0:05:33.298-0:05:33.564	IT1	0.189905	8	0.71143
Trial 1	M1-2	C-P	M	0:05:33.564-0:05:33.830	IT1	0.515005	8	1.92935
Trial 1	M1-2	C-P	M	0:05:33.830-0:05:34.096	IT1	0.492613	8	1.84544
Trial 1	M1-2	C-P	M	0:05:34.096-0:05:34.362	IT1	0.434329	8	1.62711
Trial 1	M1-2	C-P	M	0:05:34.362-0:05:34.628	IT1	1.11295	8	4.16941
Trial 1	M1-2	C-P	M	0:05:34.628-0:05:34.894	IT1	1.67187	8	6.26323
Trial 1	M1-2	C-P	M	0:05:34.894-0:05:35.160	IT1	3.70443	8	13.8778
Trial 1	M1-2	C-P	M	0:05:35.160-0:05:35.426	IT1	2.20994	8	8.27894
Trial 1	M1-2	C-P	M	0:05:35.426-0:05:35.692	IT1	1.46626	8	5.49297
Trial 1	M1-2	C-P	M	0:05:35.692-0:05:35.958	IT1	1.01213	8	3.79175
Trial 1	M1-2	C-P	M	0:05:35.958-0:05:36.224	IT1	0.38601	8	1.44608
Trial 1	M1-2	C-P	M	0:05:36.224-0:05:36.490	IT1	1.12218	8	4.20397
Trial 1	M1-2	C-P	M	0:05:36.490-0:05:36.756	IT1	0.803845	8	3.01139
Trial 1	M1-2	C-P	M	0:05:36.756-0:05:37.022	IT1	1.24546	8	4.66578
Trial 1	M1-2	C-P	M	0:05:37.022-0:05:37.288	IT1	0.840929	8	3.15035
Trial 1	M1-2	C-P	M	0:05:37.288-0:05:37.554	IT1	1.29328	8	4.84495
Trial 1	M1-2	C-P	M	0:05:37.554-0:05:37.820	IT1	0.856449	8	3.2085
Trial 1	M1-2	C-P	M	0:05:37.820-0:05:38.086	IT1	0.744112	8	2.78762
Trial 1	M1-2	C-P	M	0:05:38.086-0:05:38.352	IT1	1.28478	8	4.81311
Trial 1	M1-2	C-P	M	0:05:38.352-0:05:38.618	IT1	1.13923	8	4.26782
Trial 1	M1-2	C-P	M	0:05:38.618-0:05:38.884	IT1	0.840765	8	3.14972
Trial 1	M1-2	C-P	M	0:05:38.884-0:05:39.150	IT1	1.7244	8	6.46005
Trial 1	M1-2	C-P	M	0:05:39.150-0:05:39.416	IT1	1.02799	8	3.85111
Trial 1	M1-2	C-P	M	0:05:39.416-0:05:39.682	IT1	1.16588	8	4.36767
Trial 1	M1-2	C-P	M	0:05:39.682-0:05:39.948	IT1	0.582764	8	2.18318
Trial 1	M1-2	C-P	M	0:05:39.948-0:05:40.214	IT1	0.58549	8	2.19338
Trial 1	M1-2	C-P	M	0:05:40.214-0:05:40.480	IT1	1.32723	8	4.97217
Trial 1	M1-2	C-P	M	0:05:40.480-0:05:40.746	IT1	2.4994	8	9.36337
Trial 1	M1-2	C-P	M	0:05:40.746-0:05:41.012	IT1	1.40244	8	5.25388
Trial 1	M1-2	C-P	M	0:05:41.012-0:05:41.278	IT1	0.581219	8	2.1774
Trial 1	M1-2	C-P	M	0:05:41.278-0:05:41.544	IT1	0.356943	8	1.33719
Trial 1	M1-2	C-P	M	0:05:41.544-0:05:41.810	IT1	2.46939	8	9.25096
Trial 1	M1-2	C-P	M	0:05:41.810-0:05:42.076	IT1	3.38247	8	12.6716
Trial 1	M1-2	C-P	M	0:05:42.076-0:05:42.342	IT1	3.17228	7	13.5819
Trial 1	M1-2	C-P	M	0:05:42.342-0:05:42.608	IT1	1.80403	8	6.75836
Trial 1	M1-2	C-P	M	0:05:42.608-0:05:42.874	IT1	1.22356	8	4.58377
Trial 1	M1-2	C-P	M	0:05:42.874-0:05:43.140	IT1	1.08605	8	4.06862
Trial 1	M1-2	C-P	M	0:05:43.140-0:05:43.406	IT1	2.52886	8	9.47376
Trial 1	M1-2	C-P	M	0:05:43.406-0:05:43.672	IT1	3.18409	8	11.9284
Trial 1	M1-2	C-P	M	0:05:43.672-0:05:43.938	IT1	1.86854	8	7.00004
Trial 1	M1-2	C-P	M	0:05:43.938-0:05:44.204	IT1	0.994211	8	3.72457
Trial 1	M1-2	C-P	M	0:05:44.204-0:05:44.470	IT1	0.858675	8	3.2168
Trial 1	M1-2	C-P	M	0:05:44.470-0:05:44.736	IT1	0.759867	8	2.84666
Trial 1	M1-2	C-P	M	0:05:44.736-0:05:45.002	IT1	2.11223	8	7.91293
Trial 1	M1-2	C-P	M	0:05:45.002-0:05:45.268	IT1	1.60332	8	6.00644
Trial 1	M1-2	C-P	M	0:05:45.268-0:05:45.534	IT1	3.48001	8	13.037
Trial 1	M1-2	C-P	M	0:05:45.534-0:05:45.800	IT1	1.93731	8	7.25763
Trial 1	M1-2	C-P	M	0:05:45.800-0:05:46.066	IT1	2.15795	8	8.08425
Trial 1	M1-2	C-P	M	0:05:46.066-0:05:46.332	IT1	1.39222	8	5.21557
Trial 1	M1-2	C-P	M	0:05:46.332-0:05:46.598	IT1	0.66733	8	2.49999
Trial 1	M1-2	C-P	M	0:05:46.598-0:05:46.864	IT1	0.717356	8	2.68739
Trial 1	M1-2	C-P	M	0:05:46.864-0:05:47.130	IT1	1.17474	8	4.40084
Trial 1	M1-2	C-P	M	0:05:47.130-0:05:47.396	IT1	0.992402	8	3.71781
Trial 1	M1-2	C-P	M	0:05:47.396-0:05:47.662	IT1	0.759751	8	2.84621
Trial 1	M1-2	C-P	M	0:05:47.662-0:05:47.928	IT1	0.988867	8	3.70455
Trial 1	M1-2	C-P	M	0:05:47.928-0:05:48.194	IT1	2.01372	8	7.54388
Trial 1	M1-2	C-P	M	0:05:48.194-0:05:48.460	IT1	1.16765	8	4.37429
Trial 1	M1-2	C-P	M	0:05:48.460-0:05:48.726	IT1	1.14095	8	4.27435
Trial 1	M1-2	C-P	M	0:05:48.726-0:05:48.992	IT1	0.864362	8	3.2381
Trial 1	M1-2	C-P	M	0:05:48.992-0:05:49.258	IT1	0.757911	8	2.83933
Trial 1	M1-2	C-P	M	0:05:49.258-0:05:49.524	IT1	0.954533	8	3.5759
Trial 1	M1-2	C-P	M	0:05:49.524-0:05:49.790	IT1	1.68666	8	6.31861
Trial 1	M1-2	C-P	M	0:05:49.790-0:05:50.056	IT1	1.97571	8	7.40153
Trial 1	M1-2	C-P	M	0:05:50.056-0:05:50.322	IT1	1.86131	8	6.97293
Trial 1	M1-2	C-P	M	0:05:50.322-0:05:50.588	IT1	1.43463	8	5.3745
Trial 1	M1-2	C-P	M	0:05:50.588-0:05:50.854	IT1	0.369437	8	1.384
Trial 1	M1-2	C-P	M	0:05:50.854-0:05:51.120	IT1	2.06484	8	7.73539
Trial 1	M1-2	C-P	M	0:05:51.120-0:05:51.386	IT1	1.25968	8	4.71909
Trial 1	M1-2	C-P	M	0:05:51.386-0:05:51.652	IT1	1.72042	8	6.44509
Trial 1	M1-2	C-P	M	0:05:51.652-0:05:51.918	IT1	1.62438	7	6.95471
Trial 1	M1-2	C-P	M	0:05:51.918-0:05:52.184	IT1	1.9648	8	7.36069
Trial 1	M1-2	C-P	M	0:05:52.184-0:05:52.450	IT1	2.75452	8	10.3191
Trial 1	M1-2	C-P	M	0:05:52.450-0:05:52.716	IT1	0.932806	8	3.4945
Trial 1	M1-2	C-P	M	0:05:52.716-0:05:52.982	IT1	1.4386	8	5.38934
Trial 1	M1-2	C-P	M	0:05:52.982-0:05:53.248	IT1	0.633625	8	2.37372
Trial 1	M1-2	C-P	M	0:05:53.248-0:05:53.514	IT1	1.19897	8	4.49166
Trial 1	M1-2	C-P	M	0:05:53.514-0:05:53.780	IT1	0.907527	8	3.3998
Trial 1	M1-2	C-P	M	0:05:53.780-0:05:54.046	IT1	1.62103	8	6.07276
Trial 1	M1-2	C-P	M	0:05:54.046-0:05:54.312	IT1	1.58865	8	5.95151
Trial 1	M1-2	C-P	M	0:05:54.312-0:05:54.578	IT1	1.02694	8	3.84714
Trial 1	M1-2	C-P	M	0:05:54.578-0:05:54.844	IT1	0.703793	8	2.63659
Trial 1	M1-2	C-P	M	0:05:54.844-0:05:55.110	IT1	0.210946	8	0.790252
Trial 1	M1-2	C-P	M	0:05:55.110-0:05:55.376	IT1	0.177038	8	0.663232
Trial 1	M1-2	C-P	M	0:05:55.376-0:05:55.642	IT1	2.33217	8	8.7369
Trial 1	M1-2	C-P	M	0:05:55.642-0:05:55.908	IT1	1.01907	8	3.81767
Trial 1	M1-2	C-P	M	0:05:55.908-0:05:56.174	IT1	0.453433	8	1.69869
Trial 1	M1-2	C-P	M	0:05:56.174-0:05:56.440	IT1	0.336844	8	1.2619
Trial 1	M1-2	C-P	M	0:05:56.440-0:05:56.706	IT1	0.449436	8	1.68371
Trial 1	M1-2	C-P	M	0:05:56.706-0:05:56.972	IT1	0.286197	8	1.07217
Trial 1	M1-2	C-P	M	0:05:56.972-0:05:57.238	IT1	0.157879	8	0.591453
Trial 1	M1-2	C-P	M	0:05:57.238-0:05:57.504	IT1	0.286735	8	1.07418
Trial 1	M1-2	C-P	M	0:05:57.504-0:05:57.770	IT1	0.46124	8	1.72791
Trial 1	M1-2	C-P	M	0:05:57.770-0:05:58.036	IT1	0.193945	8	0.726563
Trial 1	M1-2	C-P	M	0:05:58.036-0:05:58.302	IT1	0.387139	8	1.45032
Trial 1	M1-2	C-P	M	0:05:58.302-0:05:58.568	IT1	0.2159	8	0.808818
Trial 1	M1-2	C-P	M	0:05:58.568-0:05:58.834	IT1	0.252089	8	0.944392
Trial 1	M1-2	C-P	M	0:05:58.834-0:05:59.100	IT1	0.30253	8	1.13335
Trial 1	M1-2	C-P	M	0:05:59.100-0:05:59.366	IT1	0.374192	8	1.40181
Trial 1	M1-2	C-P	M	0:05:59.366-0:05:59.632	IT1	0.800572	8	2.99915
Trial 1	M1-2	C-P	M	0:05:59.632-0:05:59.898	IT1	0.381815	8	1.43037
Trial 1	M1-2	C-P	M	0:05:59.898-0:06:00.164	IT1	0.839426	8	3.14471
Trial 1	M1-2	C-P	M	0:06:00.164-0:06:00.430	IT1	0.622436	8	2.33181
Trial 1	M1-2	C-P	M	0:06:00.430-0:06:00.696	IT1	0.261824	8	0.980854
Trial 1	M1-2	C-P	M	0:06:00.696-0:06:00.962	IT1	0.45606	8	1.70852
Trial 1	M1-2	C-P	M	0:06:00.962-0:06:01.228	IT1	0.707435	8	2.65024
Trial 1	M1-2	C-P	M	0:06:01.228-0:06:01.494	IT1	0.441194	7	1.88893
Trial 1	M1-2	C-P	M	0:06:01.494-0:06:01.760	IT1	0.442146	8	1.65639
Trial 1	M1-2	C-P	M	0:06:01.760-0:06:02.026	IT1	0.768808	8	2.88015
Trial 1	M1-2	C-P	M	0:06:02.026-0:06:02.292	IT1	0.287928	8	1.07865
Trial 1	M1-2	C-P	M	0:06:02.292-0:06:02.558	IT1	0.129047	8	0.483442
Trial 1	M1-2	C-P	M	0:06:02.558-0:06:02.824	IT1	0.63099	8	2.36384
Trial 1	M1-2	C-P	M	0:06:02.824-0:06:03.090	IT1	0.960818	8	3.59947
Trial 1	M1-2	C-P	M	0:06:03.090-0:06:03.356	IT1	1.42412	8	5.33509
Trial 1	M1-2	C-P	M	0:06:03.356-0:06:03.622	IT1	1.34286	8	5.03071
Trial 1	M1-2	C-P	M	0:06:03.622-0:06:03.888	IT1	1.73083	8	6.48407
Trial 1	M1-2	C-P	M	0:06:03.888-0:06:04.154	IT1	2.6593	8	9.96238
Trial 1	M1-2	C-P	M	0:06:04.154-0:06:04.420	IT1	0.726515	8	2.72171
Trial 1	M1-2	C-P	M	0:06:04.420-0:06:04.686	IT1	0.377598	8	1.41458
Trial 1	M1-2	C-P	M	0:06:04.686-0:06:04.952	IT1	0.167876	8	0.628909
Trial 1	M1-2	C-P	M	0:06:04.952-0:06:05.218	IT1	0.0523107	8	0.195972
Trial 1	M1-2	C-P	M	0:06:05.218-0:06:05.484	IT1	0.683588	8	2.56089
Trial 1	M1-2	C-P	M	0:06:05.484-0:06:05.750	IT1	1.75678	8	6.58134
Trial 1	M1-2	C-P	M	0:06:05.750-0:06:06.016	IT1	0.298266	8	1.11738
Trial 1	M1-2	C-P	M	0:06:06.016-0:06:06.282	IT1	0.36576	8	1.37023
Trial 1	M1-2	C-P	M	0:06:06.282-0:06:06.548	IT1	1.35431	8	5.07356
Trial 1	M1-2	C-P	M	0:06:06.548-0:06:06.814	IT1	4.80937	8	18.0171
Trial 1	M1-2	C-P	M	0:06:06.814-0:06:07.080	IT1	3.38214	8	12.6704
Trial 1	M1-2	C-P	M	0:06:07.080-0:06:07.346	IT1	0.832248	8	3.1178
Trial 1	M1-2	C-P	M	0:06:07.346-0:06:07.612	IT1	2.395	8	8.97228
Trial 1	M1-2	C-P	M	0:06:07.612-0:06:07.878	IT1	1.60965	8	6.03012
Trial 1	M1-2	C-P	M	0:06:07.878-0:06:08.144	IT1	1.14187	8	4.2777
Trial 1	M1-2	C-P	M	0:06:08.144-0:06:08.410	IT1	3.50821	8	13.1427
Trial 1	M1-2	C-P	M	0:06:08.410-0:06:08.676	IT1	1.82102	8	6.82198
Trial 1	M1-2	C-P	M	0:06:08.676-0:06:08.942	IT1	2.22584	8	8.33857
Trial 1	M1-2	C-P	M	0:06:08.942-0:06:09.208	IT1	1.55107	8	5.81067
Trial 1	M1-2	C-P	M	0:06:09.208-0:06:09.474	IT1	0.40465	8	1.51592
Trial 1	M1-2	C-P	M	0:06:09.474-0:06:09.740	IT1	0.543185	8	2.03491
Trial 1	M1-2	C-P	M	0:06:09.740-0:06:10.006	IT1	0.454634	8	1.70317
Trial 1	M1-2	C-P	M	0:06:10.006-0:06:10.272	IT1	0.352365	8	1.32005
Trial 1	M1-2	C-P	M	0:06:10.272-0:06:10.538	IT1	1.18254	8	4.4301
Trial 1	M1-2	C-P	M	0:06:10.538-0:06:10.804	IT1	0.384182	7	1.64485
Trial 1	M1-2	C-P	M	0:06:10.804-0:06:11.070	IT1	1.35947	8	5.09292
Trial 1	M1-2	C-P	M	0:06:11.070-0:06:11.336	IT1	1.11603	8	4.18096
Trial 1	M1-2	C-P	M	0:06:11.336-0:06:11.602	IT1	1.21055	8	4.53502
Trial 1	M1-2	C-P	M	0:06:11.602-0:06:11.868	IT1	1.86417	8	6.98365
Trial 1	M1-2	C-P	M	0:06:11.868-0:06:12.134	IT1	0.958594	8	3.59113
Trial 1	M1-2	C-P	M	0:06:12.134-0:06:12.400	IT1	1.34095	8	5.02354
Trial 1	M1-2	C-P	M	0:06:12.400-0:06:12.666	IT1	1.52221	8	5.70263
Trial 1	M1-2	C-P	M	0:06:12.666-0:06:12.932	IT1	1.93831	8	7.26136
Trial 1	M1-2	C-P	M	0:06:12.932-0:06:13.198	IT1	0.760406	8	2.84868
Trial 1	M1-2	C-P	M	0:06:13.198-0:06:13.464	IT1	0.6681	8	2.50286
Trial 1	M1-2	C-P	M	0:06:13.464-0:06:13.730	IT1	0.576543	8	2.15987
Trial 1	M1-2	C-P	M	0:06:13.730-0:06:13.996	IT1	0.606481	8	2.27204
Trial 1	M1-2	C-P	M	0:06:13.996-0:06:14.262	IT1	0.41396	8	1.55079
Trial 1	M1-2	C-P	M	0:06:14.262-0:06:14.528	IT1	0.376268	8	1.4096
Trial 1	M1-2	C-P	M	0:06:14.528-0:06:14.794	IT1	0.328413	8	1.23031
Trial 1	M1-2	C-P	M	0:06:14.794-0:06:15.060	IT1	0.42025	8	1.57435
Trial 1	M1-2	C-P	M	0:06:15.060-0:06:15.326	IT1	0.684191	8	2.56317
Trial 1	M1-2	C-P	M	0:06:15.326-0:06:15.592	IT1	0.740211	8	2.77301
Trial 1	M1-2	C-P	M	0:06:15.592-0:06:15.858	IT1	0.692646	8	2.59484
Trial 1	M1-2	C-P	M	0:06:15.858-0:06:16.124	IT1	0.768335	8	2.87837
Trial 1	M1-2	C-P	M	0:06:16.124-0:06:16.390	IT1	0.555097	8	2.07955
Trial 1	M1-2	C-P	M	0:06:16.390-0:06:16.656	IT1	0.843592	8	3.16033
Trial 1	M1-2	C-P	M	0:06:16.656-0:06:16.922	IT1	0.968751	8	3.62919
Trial 1	M1-2	C-P	M	0:06:16.922-0:06:17.188	IT1	1.17471	8	4.40078
Trial 1	M1-2	C-P	M	0:06:17.188-0:06:17.454	IT1	1.03675	8	3.8839
Trial 1	M1-2	C-P	M	0:06:17.454-0:06:17.720	IT1	1.2375	8	4.63597
Trial 1	M1-2	C-P	M	0:06:17.720-0:06:17.986	IT1	1.25627	8	4.70631
Trial 1	M1-2	C-P	M	0:06:17.986-0:06:18.252	IT1	4.5539	8	17.06
Trial 1	M1-2	C-P	M	0:06:18.252-0:06:18.518	IT1	5.21753	8	19.5462
Trial 1	M1-2	C-P	M	0:06:18.518-0:06:18.784	IT1	3.25401	8	12.1903
Trial 1	M1-2	C-P	M	0:06:18.784-0:06:19.050	IT1	0.790038	8	2.95967
Trial 1	M1-2	C-P	M	0:06:19.050-0:06:19.316	IT1	2.31729	8	8.68115
Trial 1	M1-2	C-P	M	0:06:19.316-0:06:19.582	IT1	1.32929	8	4.97981
Trial 1	M1-2	C-P	M	0:06:19.582-0:06:19.848	IT1	1.70284	8	6.37928
Trial 1	M1-2	C-P	M	0:06:19.848-0:06:20.114	IT1	1.03797	8	3.88851
Trial 1	M1-2	C-P	M	0:06:20.114-0:06:20.380	IT1	1.68726	7	7.22386
Trial 1	M1-2	C-P	M	0:06:20.380-0:06:20.646	IT1	0.61217	8	2.29334
Trial 1	M1-2	C-P	M	0:06:20.646-0:06:20.912	IT1	0.606276	8	2.27126
Trial 1	M1-2	C-P	M	0:06:20.912-0:06:21.178	IT1	1.27362	8	4.7713
Trial 1	M1-2	C-P	M	0:06:21.178-0:06:21.444	IT1	0.967946	8	3.62617
Trial 1	M1-2	C-P	M	0:06:21.444-0:06:21.710	IT1	2.34591	8	8.78835
Trial 1	M1-2	C-P	M	0:06:21.710-0:06:21.976	IT1	1.45424	8	5.44793
Trial 1	M1-2	C-P	M	0:06:21.976-0:06:22.242	IT1	0.369154	8	1.38294
Trial 1	M1-2	C-P	M	0:06:22.242-0:06:22.508	IT1	0.213121	8	0.798405
Trial 1	M1-2	C-P	M	0:06:22.508-0:06:22.774	IT1	0.440289	8	1.64944
Trial 1	M1-2	C-P	M	0:06:22.774-0:06:23.040	IT1	0.328832	8	1.23189
Trial 1	M1-2	C-P	M	0:06:23.040-0:06:23.306	IT1	0.769825	8	2.88396
Trial 1	M1-2	C-P	M	0:06:23.306-0:06:23.572	IT1	0.58109	8	2.1769
Trial 1	M1-2	C-P	M	0:06:23.572-0:06:23.838	IT1	0.705406	8	2.64262
Trial 1	M1-2	C-P	M	0:06:23.838-0:06:24.104	IT1	1.29064	8	4.83504
Trial 1	M1-2	C-P	M	0:06:24.104-0:06:24.370	IT1	0.657354	8	2.4626
Trial 1	M1-2	C-P	M	0:06:24.370-0:06:24.636	IT1	0.609875	8	2.28475
Trial 1	M1-2	C-P	M	0:06:24.636-0:06:24.902	IT1	0.359498	8	1.34677
Trial 1	M1-2	C-P	M	0:06:24.902-0:06:25.168	IT1	0.311466	8	1.16682
Trial 1	M1-2	C-P	M	0:06:25.168-0:06:25.434	IT1	0.253957	8	0.951389
Trial 1	M1-2	C-P	M	0:06:25.434-0:06:25.700	IT1	0.268652	8	1.00643
Trial 1	M1-2	C-P	M	0:06:25.700-0:06:25.966	IT1	0.232868	8	0.872386
Trial 1	M1-2	C-P	M	0:06:25.966-0:06:26.232	IT1	0.282961	8	1.06004
Trial 1	M1-2	C-P	M	0:06:26.232-0:06:26.498	IT1	0.285724	8	1.07039
Trial 1	M1-2	C-P	M	0:06:26.498-0:06:26.764	IT1	0.130075	8	0.487295
Trial 1	M1-2	C-P	M	0:06:26.764-0:06:27.030	IT1	0.353456	8	1.32413
Trial 1	M1-2	C-P	M	0:06:27.030-0:06:27.296	IT1	0.575056	8	2.15431
Trial 1	M1-2	C-P	M	0:06:27.296-0:06:27.562	IT1	0.4434	8	1.66108
Trial 1	M1-2	C-P	M	0:06:27.562-0:06:27.828	IT1	0.900691	8	3.37421
Trial 1	M1-2	C-P	M	0:06:27.828-0:06:28.094	IT1	0.875645	8	3.28039
Trial 1	M1-2	C-P	M	0:06:28.094-0:06:28.360	IT1	0.98078	8	3.67425
Trial 1	M1-2	C-P	M	0:06:28.360-0:06:28.626	IT1	1.39492	8	5.22573
Trial 1	M1-2	C-P	M	0:06:28.626-0:06:28.892	IT1	0.815294	8	3.0543
Trial 1	M1-2	C-P	M	0:06:28.892-0:06:29.158	IT1	0.207052	8	0.77567
Trial 1	M1-2	C-P	M	0:06:29.158-0:06:29.424	IT1	1.00337	8	3.75886
Trial 1	M1-2	C-P	M	0:06:29.424-0:06:29.690	IT1	1.06493	8	3.98949
Trial 1	M1-2	C-P	M	0:06:29.690-0:06:29.956	IT1	1.47427	7	6.31204
Trial 1	M1-2	C-P	M	0:06:29.956-0:06:30.222	IT1	1.06947	8	4.00649
Trial 1	M1-2	C-P	M	0:06:30.222-0:06:30.488	IT1	3.3062	8	12.3858
Trial 1	M1-2	C-P	M	0:06:30.488-0:06:30.754	IT1	2.59018	8	9.70344
Trial 1	M1-2	C-P	M	0:06:30.754-0:06:31.020	IT1	2.12074	8	7.94485
Trial 1	M1-2	C-P	M	0:06:31.020-0:06:31.286	IT1	2.47438	8	9.2696
Trial 1	M1-2	C-P	M	0:06:31.286-0:06:31.552	IT1	1.42444	8	5.33636
Trial 1	M1-2	C-P	M	0:06:31.552-0:06:31.818	IT1	1.38761	8	5.19832
Trial 1	M1-2	C-P	M	0:06:31.818-0:06:32.084	IT1	1.38368	8	5.18363
Trial 1	M1-2	C-P	M	0:06:32.084-0:06:32.350	IT1	1.16527	8	4.36539
Trial 1	M1-2	C-P	M	0:06:32.350-0:06:32.616	IT1	0.774756	8	2.90243
Trial 1	M1-2	C-P	M	0:06:32.616-0:06:32.882	IT1	0.431217	8	1.61544
Trial 1	M1-2	C-P	M	0:06:32.882-0:06:33.148	IT1	0.180677	8	0.676865
Trial 1	M1-2	C-P	M	0:06:33.148-0:06:33.414	IT1	0.0801096	8	0.30011
Trial 1	M1-2	C-P	M	0:06:33.414-0:06:33.680	IT1	0.262479	8	0.983324
Trial 1	M1-2	C-P	M	0:06:33.680-0:06:33.946	IT1	0.53861	8	2.01777
Trial 1	M1-2	C-P	M	0:06:33.946-0:06:34.212	IT1	0.374273	8	1.40212
Trial 1	M1-2	C-P	M	0:06:34.212-0:06:34.478	IT1	0.674273	8	2.52599
Trial 1	M1-2	C-P	M	0:06:34.478-0:06:34.744	IT1	0.818664	8	3.06692
Trial 1	M1-2	C-P	M	0:06:34.744-0:06:35.010	IT1	0.370545	8	1.38817
Trial 1	M1-2	C-P	M	0:06:35.010-0:06:35.276	IT1	0.727948	8	2.72707
Trial 1	M1-2	C-P	M	0:06:35.276-0:06:35.542	IT1	0.541204	8	2.02749
Trial 1	M1-2	C-P	M	0:06:35.542-0:06:35.808	IT1	0.661013	8	2.47632
Trial 1	M1-2	C-P	M	0:06:35.808-0:06:36.074	IT1	0.6162	8	2.30844
Trial 1	M1-2	C-P	M	0:06:36.074-0:06:36.340	IT1	0.972663	8	3.64383
Trial 1	M1-2	C-P	M	0:06:36.340-0:06:36.606	IT1	0.837556	8	3.13768
Trial 1	M1-2	C-P	M	0:06:36.606-0:06:36.872	IT1	0.257868	8	0.966037
Trial 1	M1-2	C-P	M	0:06:36.872-0:06:37.138	IT1	0.167715	8	0.628297
Trial 1	M1-2	C-P	M	0:06:37.138-0:06:37.404	IT1	0.489565	8	1.83404
Trial 1	M1-2	C-P	M	0:06:37.404-0:06:37.670	IT1	0.71696	8	2.68591
Trial 1	M1-2	C-P	M	0:06:37.670-0:06:37.936	IT1	1.20896	8	4.52908
Trial 1	M1-2	C-P	M	0:06:37.936-0:06:38.202	IT1	2.89164	8	10.8328
Trial 1	M1-2	C-P	M	0:06:38.202-0:06:38.468	IT1	0.73968	8	2.77102
Trial 1	M1-2	C-P	M	0:06:38.468-0:06:38.734	IT1	0.416453	8	1.56014
Trial 1	M1-2	C-P	M	0:06:38.734-0:06:39.000	IT1	0.274743	8	1.02925
Trial 1	M1-2	C-P	M	0:06:39.000-0:06:39.266	IT1	0.584966	8	2.19142
Trial 1	M1-2	C-P	M	0:06:39.266-0:06:39.532	IT1	0.3337	7	1.42872
Trial 1	M1-2	C-P	M	0:06:39.532-0:06:39.798	IT1	0.709466	8	2.65783
Trial 1	M1-2	C-P	M	0:06:39.798-0:06:40.064	IT1	0.590864	8	2.21353
Trial 1	M1-2	C-P	M	0:06:40.064-0:06:40.330	IT1	1.51139	8	5.66205
Trial 1	M1-2	C-P	M	0:06:40.330-0:06:40.596	IT1	0.21352	8	0.799901
Trial 1	M1-2	C-P	M	0:06:40.596-0:06:40.862	IT1	0.156988	8	0.588112
Trial 1	M1-2	C-P	M	0:06:40.862-0:06:41.128	IT1	0.469389	8	1.75847
Trial 1	M1-2	C-P	M	0:06:41.128-0:06:41.394	IT1	0.98089	8	3.67466
Trial 1	M1-2	C-P	M	0:06:41.394-0:06:41.660	IT1	0.865337	8	3.24176
Trial 1	M1-2	C-P	M	0:06:41.660-0:06:41.926	IT1	1.21667	8	4.55796
Trial 1	M1-2	C-P	M	0:06:41.926-0:06:42.192	IT1	0.61216	8	2.2933
Trial 1	M1-2	C-P	M	0:06:42.192-0:06:42.458	IT1	1.11579	8	4.18001
Trial 1	M1-2	C-P	M	0:06:42.458-0:06:42.724	IT1	0.908582	8	3.40377
Trial 1	M1-2	C-P	M	0:06:42.724-0:06:42.990	IT1	1.39128	8	5.21209
Trial 1	M1-2	C-P	M	0:06:42.990-0:06:43.256	IT1	3.06708	8	11.4901
Trial 1	M1-2	C-P	M	0:06:43.256-0:06:43.522	IT1	2.22835	8	8.34794
Trial 1	M1-2	C-P	M	0:06:43.522-0:06:43.788	IT1	0.641528	8	2.40333
Trial 1	M1-2	C-P	M	0:06:43.788-0:06:44.054	IT1	0.520931	8	1.95155
Trial 1	M1-2	C-P	M	0:06:44.054-0:06:44.320	IT1	0.411248	8	1.54065
Trial 1	M1-2	C-P	M	0:06:44.320-0:06:44.586	IT1	0.131988	8	0.494455
Trial 1	M1-2	C-P	M	0:06:44.586-0:06:44.852	IT1	0.193554	8	0.725096
Trial 1	M1-2	C-P	M	0:06:44.852-0:06:45.118	IT1	0.569053	8	2.13183
Trial 1	M1-2	C-P	M	0:06:45.118-0:06:45.384	IT1	0.714971	8	2.67846
Trial 1	M1-2	C-P	M	0:06:45.384-0:06:45.650	IT1	0.892115	8	3.34211
Trial 1	M1-2	C-P	M	0:06:45.650-0:06:45.916	IT1	2.37869	8	8.91115
Trial 1	M1-2	C-P	M	0:06:45.916-0:06:46.182	IT1	3.87442	8	14.5145
Trial 1	M1-2	C-P	M	0:06:46.182-0:06:46.448	IT1	2.69563	8	10.0985
Trial 1	M1-2	C-P	M	0:06:46.448-0:06:46.714	IT1	1.05615	8	3.95658
Trial 1	M1-2	C-P	M	0:06:46.714-0:06:46.980	IT1	1.74211	8	6.52639
Trial 1	M1-2	C-P	M	0:06:46.980-0:06:47.246	IT1	0.631657	8	2.36633
Trial 1	M1-2	C-P	M	0:06:47.246-0:06:47.512	IT1	1.86032	8	6.96925
Trial 1	M1-2	C-P	M	0:06:47.512-0:06:47.778	IT1	1.73721	8	6.50803
Trial 1	M1-2	C-P	M	0:06:47.778-0:06:48.044	IT1	0.673626	8	2.52357
Trial 1	M1-2	C-P	M	0:06:48.044-0:06:48.310	IT1	0.712436	8	2.66897
Trial 1	M1-2	C-P	M	0:06:48.310-0:06:48.576	IT1	1.09623	8	4.10677
Trial 1	M1-2	C-P	M	0:06:48.576-0:06:48.842	IT1	0.580925	7	2.48719
Trial 1	M1-2	C-P	M	0:06:48.842-0:06:49.108	IT1	0.550112	8	2.06086
Trial 1	M1-2	C-P	M	0:06:49.108-0:06:49.374	IT1	0.533796	8	1.99974
Trial 1	M1-2	C-P	M	0:06:49.374-0:06:49.640	IT1	1.23439	8	4.62434
Trial 1	M1-2	C-P	M	0:06:49.640-0:06:49.906	IT1	0.592137	8	2.2183
Trial 1	M1-2	C-P	M	0:06:49.906-0:06:50.172	CS2a	1.31273	8	4.91781
Trial 1	M1-2	C-P	M	0:06:50.172-0:06:50.438	CS2a	0.665038	8	2.49139
Trial 1	M1-2	C-P	M	0:06:50.438-0:06:50.704	CS2a	0.243746	8	0.913132
Trial 1	M1-2	C-P	M	0:06:50.704-0:06:50.970	CS2a	0.554569	8	2.07755
Trial 1	M1-2	C-P	M	0:06:50.970-0:06:51.236	CS2a	0.350029	8	1.31129
Trial 1	M1-2	C-P	M	0:06:51.236-0:06:51.502	CS2a	0.276399	8	1.03546
Trial 1	M1-2	C-P	M	0:06:51.502-0:06:51.768	CS2a	0.451092	8	1.68989
Trial 1	M1-2	C-P	M	0:06:51.768-0:06:52.034	CS2a	0.542868	8	2.03374
Trial 1	M1-2	C-P	M	0:06:52.034-0:06:52.300	CS2a	0.476757	8	1.78604
Trial 1	M1-2	C-P	M	0:06:52.300-0:06:52.566	CS2a	0.784069	8	2.93732
Trial 1	M1-2	C-P	M	0:06:52.566-0:06:52.832	CS2a	1.06091	8	3.97441
Trial 1	M1-2	C-P	M	0:06:52.832-0:06:53.098	CS2a	0.393948	8	1.47583
Trial 1	M1-2	C-P	M	0:06:53.098-0:06:53.364	CS2a	0.785808	8	2.94384
Trial 1	M1-2	C-P	M	0:06:53.364-0:06:53.630	CS2a	0.569252	8	2.13255
Trial 1	M1-2	C-P	M	0:06:53.630-0:06:53.896	CS2a	0.605016	8	2.26654
Trial 1	M1-2	C-P	M	0:06:53.896-0:06:54.162	CS2a	0.231034	8	0.865507
Trial 1	M1-2	C-P	M	0:06:54.162-0:06:54.428	CS2a	0.257657	8	0.965248
Trial 1	M1-2	C-P	M	0:06:54.428-0:06:54.694	CS2a	0.268673	8	1.00651
Trial 1	M1-2	C-P	M	0:06:54.694-0:06:54.960	CS2a	0.341045	8	1.27764
Trial 1	M1-2	C-P	M	0:06:54.960-0:06:55.226	CS2a	0.667555	8	2.50083
Trial 1	M1-2	C-P	M	0:06:55.226-0:06:55.492	CS2a	0.610815	8	2.28825
Trial 1	M1-2	C-P	M	0:06:55.492-0:06:55.758	CS2a	1.01606	8	3.8064
Trial 1	M1-2	C-P	M	0:06:55.758-0:06:56.024	CS2a	0.58375	8	2.18689
Trial 1	M1-2	C-P	M	0:06:56.024-0:06:56.290	CS2a	0.428066	8	1.60364
Trial 1	M1-2	C-P	M	0:06:56.290-0:06:56.556	CS2a	0.648761	8	2.43041
Trial 1	M1-2	C-P	M	0:06:56.556-0:06:56.822	CS2a	2.90939	8	10.8992
Trial 1	M1-2	C-P	M	0:06:56.822-0:06:57.088	CS2a	0.469287	8	1.75807
Trial 1	M1-2	C-P	M	0:06:57.088-0:06:57.354	CS2a	0.539546	8	2.02128
Trial 1	M1-2	C-P	M	0:06:57.354-0:06:57.620	CS2a	0.426205	8	1.59667
Trial 1	M1-2	C-P	M	0:06:57.620-0:06:57.886	CS2a	0.242142	8	0.907125
Trial 1	M1-2	C-P	M	0:06:57.886-0:06:58.152	CS2a	0.122884	8	0.460356
Trial 1	M1-2	C-P	M	0:06:58.152-0:06:58.418	CS2a	0.039074	7	0.167292
Trial 1	M1-2	C-P	M	0:06:58.418-0:06:58.684	CS2a	0.29978	8	1.12305
Trial 1	M1-2	C-P	M	0:06:58.684-0:06:58.950	CS2a	0.721584	8	2.70322
Trial 1	M1-2	C-P	M	0:06:58.950-0:06:59.216	CS2a	1.43625	8	5.38053
Trial 1	M1-2	C-P	M	0:06:59.216-0:06:59.482	CS2a	5.37284	8	20.1279
Trial 1	M1-2	C-P	M	0:06:59.482-0:06:59.748	CS2a	1.70393	8	6.3833
Trial 1	M1-2	C-P	M	0:06:59.748-0:07:00.014	CS2a	0.184825	8	0.692401
Trial 1	M1-2	C-P	M	0:07:00.014-0:07:00.280	CS2b	2.4953	8	9.34805
Trial 1	M1-2	C-P	M	0:07:00.280-0:07:00.546	CS2b	1.46362	8	5.48306
Trial 1	M1-2	C-P	M	0:07:00.546-0:07:00.812	CS2b	0.678959	8	2.54357
Trial 1	M1-2	C-P	M	0:07:00.812-0:07:01.078	CS2b	0.967516	8	3.62455
Trial 1	M1-2	C-P	M	0:07:01.078-0:07:01.344	CS2b	0.896923	8	3.36011
Trial 1	M1-2	C-P	M	0:07:01.344-0:07:01.610	CS2b	3.32348	8	12.4505
Trial 1	M1-2	C-P	M	0:07:01.610-0:07:01.876	CS2b	0.961512	8	3.60205
Trial 1	M1-2	C-P	M	0:07:01.876-0:07:02.142	CS2b	1.32452	8	4.96202
Trial 1	M1-2	C-P	M	0:07:02.142-0:07:02.408	CS2b	5.25107	8	19.6718
Trial 1	M1-2	C-P	M	0:07:02.408-0:07:02.674	CS2b	0.821528	8	3.07764
Trial 1	M1-2	C-P	M	0:07:02.674-0:07:02.940	CS2b	0.391053	8	1.46497
Trial 1	M1-2	C-P	M	0:07:02.940-0:07:03.206	CS2b	0.878131	8	3.28971
Trial 1	M1-2	C-P	M	0:07:03.206-0:07:03.472	CS2b	0.849482	8	3.18238
Trial 1	M1-2	C-P	M	0:07:03.472-0:07:03.738	CS2b	0.516059	8	1.93328
Trial 1	M1-2	C-P	M	0:07:03.738-0:07:04.004	CS2b	0.432021	8	1.61846
Trial 1	M1-2	C-P	M	0:07:04.004-0:07:04.270	CS2b	1.26424	8	4.73616
Trial 1	M1-2	C-P	M	0:07:04.270-0:07:04.536	CS2b	2.1665	8	8.11622
Trial 1	M1-2	C-P	M	0:07:04.536-0:07:04.802	CS2b	1.09818	8	4.11406
Trial 1	M1-2	C-P	M	0:07:04.802-0:07:05.068	CS2b	0.698879	8	2.61816
Trial 1	M1-2	C-P	M	0:07:05.068-0:07:05.334	CS2b	0.764959	8	2.86573
Trial 1	M1-2	C-P	M	0:07:05.334-0:07:05.600	CS2b	0.148386	8	0.555887
Trial 1	M1-2	C-P	M	0:07:05.600-0:07:05.866	CS2b	0.440489	8	1.65017
Trial 1	M1-2	C-P	M	0:07:05.866-0:07:06.132	CS2b	0.259545	8	0.972334
Trial 1	M1-2	C-P	M	0:07:06.132-0:07:06.398	CS2b	0.195958	8	0.734102
Trial 1	M1-2	C-P	M	0:07:06.398-0:07:06.664	CS2b	0.506716	8	1.89828
Trial 1	M1-2	C-P	M	0:07:06.664-0:07:06.930	CS2b	0.120056	8	0.449759
Trial 1	M1-2	C-P	M	0:07:06.930-0:07:07.196	CS2b	0.355128	8	1.3304
Trial 1	M1-2	C-P	M	0:07:07.196-0:07:07.462	CS2b	0.718315	8	2.69099
Trial 1	M1-2	C-P	M	0:07:07.462-0:07:07.728	CS2b	0.836241	8	3.13279
Trial 1	M1-2	C-P	M	0:07:07.728-0:07:07.994	CS2b	0.462858	7	1.98169
Trial 1	M1-2	C-P	M	0:07:07.994-0:07:08.260	CS2b	0.450589	8	1.68804
Trial 1	M1-2	C-P	M	0:07:08.260-0:07:08.526	CS2b	0.374741	8	1.40386
Trial 1	M1-2	C-P	M	0:07:08.526-0:07:08.792	CS2b	0.267081	8	1.00055
Trial 1	M1-2	C-P	M	0:07:08.792-0:07:09.058	CS2b	0.552575	8	2.07009
Trial 1	M1-2	C-P	M	0:07:09.058-0:07:09.324	CS2b	0.643315	8	2.41001
Trial 1	M1-2	C-P	M	0:07:09.324-0:07:09.590	CS2b	3.78237	8	14.1697
Trial 1	M1-2	C-P	M	0:07:09.590-0:07:09.856	CS2b	1.8534	8	6.94326
Trial 1	M1-2	C-P	M	0:07:09.856-0:07:10.122	IT2	0.591046	8	2.21419
Trial 1	M1-2	C-P	M	0:07:10.122-0:07:10.388	IT2	0.452978	8	1.69696
Trial 1	M1-2	C-P	M	0:07:10.388-0:07:10.654	IT2	1.22881	8	4.60343
Trial 1	M1-2	C-P	M	0:07:10.654-0:07:10.920	IT2	0.602786	8	2.25819
Trial 1	M1-2	C-P	M	0:07:10.920-0:07:11.186	IT2	0.414992	8	1.55466
Trial 1	M1-2	C-P	M	0:07:11.186-0:07:11.452	IT2	1.28357	8	4.80855
Trial 1	M1-2	C-P	M	0:07:11.452-0:07:11.718	IT2	2.30304	8	8.6278
Trial 1	M1-2	C-P	M	0:07:11.718-0:07:11.984	IT2	2.49787	8	9.35761
Trial 1	M1-2	C-P	M	0:07:11.984-0:07:12.250	IT2	2.93536	8	10.9966
Trial 1	M1-2	C-P	M	0:07:12.250-0:07:12.516	IT2	4.21069	8	15.7743
Trial 1	M1-2	C-P	M	0:07:12.516-0:07:12.782	IT2	1.72072	8	6.44622
Trial 1	M1-2	C-P	M	0:07:12.782-0:07:13.048	IT2	1.05755	8	3.96185
Trial 1	M1-2	C-P	M	0:07:13.048-0:07:13.314	IT2	1.91783	8	7.18464
Trial 1	M1-2	C-P	M	0:07:13.314-0:07:13.580	IT2	2.19831	8	8.23543
Trial 1	M1-2	C-P	M	0:07:13.580-0:07:13.846	IT2	1.24049	8	4.64716
Trial 1	M1-2	C-P	M	0:07:13.846-0:07:14.112	IT2	1.40747	8	5.27274
Trial 1	M1-2	C-P	M	0:07:14.112-0:07:14.378	IT2	1.30956	8	4.90594
Trial 1	M1-2	C-P	M	0:07:14.378-0:07:14.644	IT2	3.22122	8	12.0675
Trial 1	M1-2	C-P	M	0:07:14.644-0:07:14.910	IT2	1.34945	8	5.05537
Trial 1	M1-2	C-P	M	0:07:14.910-0:07:15.176	IT2	1.0338	8	3.87285
Trial 1	M1-2	C-P	M	0:07:15.176-0:07:15.442	IT2	1.1562	8	4.3314
Trial 1	M1-2	C-P	M	0:07:15.442-0:07:15.708	IT2	0.615608	8	2.30621
Trial 1	M1-2	C-P	M	0:07:15.708-0:07:15.974	IT2	0.339227	8	1.27083
Trial 1	M1-2	C-P	M	0:07:15.974-0:07:16.240	IT2	0.293169	8	1.09828
Trial 1	M1-2	C-P	M	0:07:16.240-0:07:16.506	IT2	0.501004	8	1.87689
Trial 1	M1-2	C-P	M	0:07:16.506-0:07:16.772	IT2	0.795832	8	2.98137
Trial 1	M1-2	C-P	M	0:07:16.772-0:07:17.038	IT2	0.750367	8	2.81106
Trial 1	M1-2	C-P	M	0:07:17.038-0:07:17.304	IT2	1.53181	8	5.73854
Trial 1	M1-2	C-P	M	0:07:17.304-0:07:17.570	IT2	0.939638	7	4.023
Trial 1	M1-2	C-P	M	0:07:17.570-0:07:17.836	IT2	1.36714	8	5.12163
Trial 1	M1-2	C-P	M	0:07:17.836-0:07:18.102	IT2	2.29568	8	8.60019
Trial 1	M1-2	C-P	M	0:07:18.102-0:07:18.368	IT2	0.819046	8	3.06834
Trial 1	M1-2	C-P	M	0:07:18.368-0:07:18.634	IT2	1.16654	8	4.37017
Trial 1	M1-2	C-P	M	0:07:18.634-0:07:18.900	IT2	0.756243	8	2.83307
Trial 1	M1-2	C-P	M	0:07:18.900-0:07:19.166	IT2	1.05416	8	3.94916
Trial 1	M1-2	C-P	M	0:07:19.166-0:07:19.432	IT2	2.26363	8	8.48012
Trial 1	M1-2	C-P	M	0:07:19.432-0:07:19.698	IT2	0.530881	8	1.98882
Trial 1	M1-2	C-P	M	0:07:19.698-0:07:19.964	IT2	0.5227	8	1.95816
Trial 1	M1-2	C-P	M	0:07:19.964-0:07:20.230	IT2	0.248087	8	0.929396
Trial 1	M1-2	C-P	M	0:07:20.230-0:07:20.496	IT2	0.359532	8	1.3469
Trial 1	M1-2	C-P	M	0:07:20.496-0:07:20.762	IT2	0.197969	8	0.74164
Trial 1	M1-2	C-P	M	0:07:20.762-0:07:21.028	IT2	0.397345	8	1.48855
Trial 1	M1-2	C-P	M	0:07:21.028-0:07:21.294	IT2	0.219993	8	0.824149
Trial 1	M1-2	C-P	M	0:07:21.294-0:07:21.560	IT2	0.339883	8	1.27328
Trial 1	M1-2	C-P	M	0:07:21.560-0:07:21.826	IT2	0.756826	8	2.83526
Trial 1	M1-2	C-P	M	0:07:21.826-0:07:22.092	IT2	0.696591	8	2.6096
Trial 1	M1-2	C-P	M	0:07:22.092-0:07:22.358	IT2	0.149532	8	0.560185
Trial 1	M1-2	C-P	M	0:07:22.358-0:07:22.624	IT2	0.15974	8	0.598424
Trial 1	M1-2	C-P	M	0:07:22.624-0:07:22.890	IT2	0.169793	8	0.636083
Trial 1	M1-2	C-P	M	0:07:22.890-0:07:23.156	IT2	0.158423	8	0.5935
Trial 1	M1-2	C-P	M	0:07:23.156-0:07:23.422	IT2	0.683451	8	2.56037
Trial 1	M1-2	C-P	M	0:07:23.422-0:07:23.688	IT2	0.479519	8	1.79641
Trial 1	M1-2	C-P	M	0:07:23.688-0:07:23.954	IT2	0.542412	8	2.032
Trial 1	M1-2	C-P	M	0:07:23.954-0:07:24.220	IT2	1.21846	8	4.56465
Trial 1	M1-2	C-P	M	0:07:24.220-0:07:24.486	IT2	2.04537	8	7.66246
Trial 1	M1-2	C-P	M	0:07:24.486-0:07:24.752	IT2	1.57346	8	5.89455
Trial 1	M1-2	C-P	M	0:07:24.752-0:07:25.018	IT2	0.893852	8	3.34858
Trial 1	M1-2	C-P	M	0:07:25.018-0:07:25.284	IT2	0.373601	8	1.3996
Trial 1	M1-2	C-P	M	0:07:25.284-0:07:25.550	IT2	0.61551	8	2.30585
Trial 1	M1-2	C-P	M	0:07:25.550-0:07:25.816	IT2	1.34098	8	5.02369
Trial 1	M1-2	C-P	M	0:07:25.816-0:07:26.082	IT2	2.86503	8	10.7331
Trial 1	M1-2	C-P	M	0:07:26.082-0:07:26.348	IT2	1.86273	8	6.97827
Trial 1	M1-2	C-P	M	0:07:26.348-0:07:26.614	IT2	1.33823	8	5.01333
Trial 1	M1-2	C-P	M	0:07:26.614-0:07:26.880	IT2	0.264766	7	1.13358
Trial 1	M1-2	C-P	M	0:07:26.880-0:07:27.146	IT2	0.871836	8	3.26613
Trial 1	M1-2	C-P	M	0:07:27.146-0:07:27.412	IT2	0.973599	8	3.64737
Trial 1	M1-2	C-P	M	0:07:27.412-0:07:27.678	IT2	1.41704	8	5.30857
Trial 1	M1-2	C-P	M	0:07:27.678-0:07:27.944	IT2	0.615455	8	2.30565
Trial 1	M1-2	C-P	M	0:07:27.944-0:07:28.210	IT2	0.319391	8	1.19652
Trial 1	M1-2	C-P	M	0:07:28.210-0:07:28.476	IT2	0.537904	8	2.01512
Trial 1	M1-2	C-P	M	0:07:28.476-0:07:28.742	IT2	0.484609	8	1.81548
Trial 1	M1-2	C-P	M	0:07:28.742-0:07:29.008	IT2	0.121426	8	0.45489
Trial 1	M1-2	C-P	M	0:07:29.008-0:07:29.274	IT2	0.352354	8	1.32001
Trial 1	M1-2	C-P	M	0:07:29.274-0:07:29.540	IT2	0.605441	8	2.26813
Trial 1	M1-2	C-P	M	0:07:29.540-0:07:29.806	IT2	0.347564	8	1.30205
Trial 1	M1-2	C-P	M	0:07:29.806-0:07:30.072	IT2	0.322684	8	1.20886
Trial 1	M1-2	C-P	M	0:07:30.072-0:07:30.338	IT2	0.479231	8	1.79531
Trial 1	M1-2	C-P	M	0:07:30.338-0:07:30.604	IT2	0.139183	8	0.521415
Trial 1	M1-2	C-P	M	0:07:30.604-0:07:30.870	IT2	0.063364	8	0.237375
Trial 1	M1-2	C-P	M	0:07:30.870-0:07:31.136	IT2	0.611296	8	2.29005
Trial 1	M1-2	C-P	M	0:07:31.136-0:07:31.402	IT2	0.828639	8	3.10431
Trial 1	M1-2	C-P	M	0:07:31.402-0:07:31.668	IT2	0.897352	8	3.36171
Trial 1	M1-2	C-P	M	0:07:31.668-0:07:31.934	IT2	0.787856	8	2.95152
Trial 1	M1-2	C-P	M	0:07:31.934-0:07:32.200	IT2	0.606952	8	2.27379
Trial 1	M1-2	C-P	M	0:07:32.200-0:07:32.466	IT2	0.476171	8	1.78385
Trial 1	M1-2	C-P	M	0:07:32.466-0:07:32.732	IT2	0.387277	8	1.45084
Trial 1	M1-2	C-P	M	0:07:32.732-0:07:32.998	IT2	0.164413	8	0.615934
Trial 1	M1-2	C-P	M	0:07:32.998-0:07:33.264	IT2	0.238743	8	0.894389
Trial 1	M1-2	C-P	M	0:07:33.264-0:07:33.530	IT2	0.441597	8	1.65433
Trial 1	M1-2	C-P	M	0:07:33.530-0:07:33.796	IT2	0.786201	8	2.94531
Trial 1	M1-2	C-P	M	0:07:33.796-0:07:34.062	IT2	0.905901	8	3.39372
Trial 1	M1-2	C-P	M	0:07:34.062-0:07:34.328	IT2	1.25439	8	4.69923
Trial 1	M1-2	C-P	M	0:07:34.328-0:07:34.594	IT2	1.06198	8	3.97845
Trial 1	M1-2	C-P	M	0:07:34.594-0:07:34.860	IT2	1.69157	8	6.33706
Trial 1	M1-2	C-P	M	0:07:34.860-0:07:35.126	IT2	1.70573	8	6.39007
Trial 1	M1-2	C-P	M	0:07:35.126-0:07:35.392	IT2	0.980926	8	3.67479
Trial 1	M1-2	C-P	M	0:07:35.392-0:07:35.658	IT2	0.714104	8	2.6752
Trial 1	M1-2	C-P	M	0:07:35.658-0:07:35.924	IT2	0.585184	8	2.19226
Trial 1	M1-2	C-P	M	0:07:35.924-0:07:36.190	IT2	0.870269	8	3.26024
Trial 1	M1-2	C-P	M	0:07:36.190-0:07:36.456	IT2	0.976946	7	4.18277
Trial 1	M1-2	C-P	M	0:07:36.456-0:07:36.722	IT2	1.05196	8	3.94091
Trial 1	M1-2	C-P	M	0:07:36.722-0:07:36.988	IT2	0.266152	8	0.997071
Trial 1	M1-2	C-P	M	0:07:36.988-0:07:37.254	IT2	1.19568	8	4.47931
Trial 1	M1-2	C-P	M	0:07:37.254-0:07:37.520	IT2	1.00786	8	3.77571
Trial 1	M1-2	C-P	M	0:07:37.520-0:07:37.786	IT2	1.04876	8	3.92889
Trial 1	M1-2	C-P	M	0:07:37.786-0:07:38.052	IT2	1.80005	8	6.74339
Trial 1	M1-2	C-P	M	0:07:38.052-0:07:38.318	IT2	0.987696	8	3.70015
Trial 1	M1-2	C-P	M	0:07:38.318-0:07:38.584	IT2	3.0658	8	11.4852
Trial 1	M1-2	C-P	M	0:07:38.584-0:07:38.850	IT2	2.16112	8	8.09623
Trial 1	M1-2	C-P	M	0:07:38.850-0:07:39.116	IT2	1.91681	8	7.18079
Trial 1	M1-2	C-P	M	0:07:39.116-0:07:39.382	IT2	0.342051	8	1.28142
Trial 1	M1-2	C-P	M	0:07:39.382-0:07:39.648	IT2	0.358022	8	1.34123
Trial 1	M1-2	C-P	M	0:07:39.648-0:07:39.914	IT2	0.420743	8	1.57621
Trial 1	M1-2	C-P	M	0:07:39.914-0:07:40.180	IT2	0.12838	8	0.480946
Trial 1	M1-2	C-P	M	0:07:40.180-0:07:40.446	IT2	0.267719	8	1.00294
Trial 1	M1-2	C-P	M	0:07:40.446-0:07:40.712	IT2	1.34592	8	5.04223
Trial 1	M1-2	C-P	M	0:07:40.712-0:07:40.978	IT2	2.02949	8	7.60292
Trial 1	M1-2	C-P	M	0:07:40.978-0:07:41.244	IT2	4.59347	8	17.2083
Trial 1	M1-2	C-P	M	0:07:41.244-0:07:41.510	IT2	1.26922	8	4.75481
Trial 1	M1-2	C-P	M	0:07:41.510-0:07:41.776	IT2	1.19403	8	4.47312
Trial 1	M1-2	C-P	M	0:07:41.776-0:07:42.042	IT2	2.0927	8	7.8398
Trial 1	M1-2	C-P	M	0:07:42.042-0:07:42.308	IT2	0.7767	8	2.90971
Trial 1	M1-2	C-P	M	0:07:42.308-0:07:42.574	IT2	1.4032	8	5.25673
Trial 1	M1-2	C-P	M	0:07:42.574-0:07:42.840	IT2	3.19933	8	11.9854
Trial 1	M1-2	C-P	M	0:07:42.840-0:07:43.106	IT2	1.42278	8	5.33009
Trial 1	M1-2	C-P	M	0:07:43.106-0:07:43.372	IT2	0.760336	8	2.8484
Trial 1	M1-2	C-P	M	0:07:43.372-0:07:43.638	IT2	1.36145	8	5.10034
Trial 1	M1-2	C-P	M	0:07:43.638-0:07:43.904	IT2	3.00652	8	11.2631
Trial 1	M1-2	C-P	M	0:07:43.904-0:07:44.170	IT2	3.55768	8	13.328
Trial 1	M1-2	C-P	M	0:07:44.170-0:07:44.436	IT2	1.93618	8	7.2534
Trial 1	M1-2	C-P	M	0:07:44.436-0:07:44.702	IT2	1.91552	8	7.17605
Trial 1	M1-2	C-P	M	0:07:44.702-0:07:44.968	IT2	2.77806	8	10.4073
Trial 1	M1-2	C-P	M	0:07:44.968-0:07:45.234	IT2	2.8644	8	10.7307
Trial 1	M1-2	C-P	M	0:07:45.234-0:07:45.500	IT2	2.06041	8	7.71882
Trial 1	M1-2	C-P	M	0:07:45.500-0:07:45.766	IT2	1.25762	8	4.71136
Trial 1	M1-2	C-P	M	0:07:45.766-0:07:46.032	IT2	0.207832	7	0.889816
Trial 1	M1-2	C-P	M	0:07:46.032-0:07:46.298	IT2	0.315813	8	1.18313
Trial 1	M1-2	C-P	M	0:07:46.298-0:07:46.564	IT2	0.313878	8	1.17586
Trial 1	M1-2	C-P	M	0:07:46.564-0:07:46.830	IT2	5.40929	8	20.2645
Trial 1	M1-2	C-P	M	0:07:46.830-0:07:47.096	IT2	2.15878	8	8.08732
Trial 1	M1-2	C-P	M	0:07:47.096-0:07:47.362	IT2	1.68429	8	6.3098
Trial 1	M1-2	C-P	M	0:07:47.362-0:07:47.628	IT2	1.88331	8	7.05532
Trial 1	M1-2	C-P	M	0:07:47.628-0:07:47.894	IT2	1.76613	8	6.61637
Trial 1	M1-2	C-P	M	0:07:47.894-0:07:48.160	IT2	1.5618	8	5.85091
Trial 1	M1-2	C-P	M	0:07:48.160-0:07:48.426	IT2	0.969969	8	3.63376
Trial 1	M1-2	C-P	M	0:07:48.426-0:07:48.692	IT2	1.1338	8	4.24746
Trial 1	M1-2	C-P	M	0:07:48.692-0:07:48.958	IT2	0.534475	8	2.00227
Trial 1	M1-2	C-P	M	0:07:48.958-0:07:49.224	IT2	0.49821	8	1.86642
Trial 1	M1-2	C-P	M	0:07:49.224-0:07:49.490	IT2	0.171651	8	0.643049
Trial 1	M1-2	C-P	M	0:07:49.490-0:07:49.756	IT2	0.269002	8	1.00775
Trial 1	M1-2	C-P	M	0:07:49.756-0:07:50.022	IT2	0.112874	8	0.42285
Trial 1	M1-2	C-P	M	0:07:50.022-0:07:50.288	IT2	0.154583	8	0.579113
Trial 1	M1-2	C-P	M	0:07:50.288-0:07:50.554	IT2	0.204043	8	0.764392
Trial 1	M1-2	C-P	M	0:07:50.554-0:07:50.820	IT2	0.0997167	8	0.373566
Trial 1	M1-2	C-P	M	0:07:50.820-0:07:51.086	IT2	0.673759	8	2.52407
Trial 1	M1-2	C-P	M	0:07:51.086-0:07:51.352	IT2	0.674316	8	2.52616
Trial 1	M1-2	C-P	M	0:07:51.352-0:07:51.618	IT2	0.521803	8	1.95481
Trial 1	M1-2	C-P	M	0:07:51.618-0:07:51.884	IT2	0.254194	8	0.952271
Trial 1	M1-2	C-P	M	0:07:51.884-0:07:52.150	IT2	0.247701	8	0.927951
Trial 1	M1-2	C-P	M	0:07:52.150-0:07:52.416	IT2	0.0745874	8	0.279423
Trial 1	M1-2	C-P	M	0:07:52.416-0:07:52.682	IT2	0.142992	8	0.535681
Trial 1	M1-2	C-P	M	0:07:52.682-0:07:52.948	IT2	0.568241	8	2.12877
Trial 1	M1-2	C-P	M	0:07:52.948-0:07:53.214	IT2	0.746968	8	2.79833
Trial 1	M1-2	C-P	M	0:07:53.214-0:07:53.480	IT2	2.08122	8	7.79679
Trial 1	M1-2	C-P	M	0:07:53.480-0:07:53.746	IT2	1.01337	8	3.79634
Trial 1	M1-2	C-P	M	0:07:53.746-0:07:54.012	IT2	1.89036	8	7.08179
Trial 1	M1-2	C-P	M	0:07:54.012-0:07:54.278	IT2	1.59357	8	5.9699
Trial 1	M1-2	C-P	M	0:07:54.278-0:07:54.544	IT2	1.46595	8	5.49179
Trial 1	M1-2	C-P	M	0:07:54.544-0:07:54.810	IT2	1.17103	8	4.38697
Trial 1	M1-2	C-P	M	0:07:54.810-0:07:55.076	IT2	1.46492	8	5.48797
Trial 1	M1-2	C-P	M	0:07:55.076-0:07:55.342	IT2	0.425614	7	1.82224
Trial 1	M1-2	C-P	M	0:07:55.342-0:07:55.608	IT2	0.661026	8	2.47636
Trial 1	M1-2	C-P	M	0:07:55.608-0:07:55.874	IT2	0.401286	8	1.50332
Trial 1	M1-2	C-P	M	0:07:55.874-0:07:56.140	IT2	0.646391	8	2.42154
Trial 1	M1-2	C-P	M	0:07:56.140-0:07:56.406	IT2	0.634398	8	2.37662
Trial 1	M1-2	C-P	M	0:07:56.406-0:07:56.672	IT2	0.364653	8	1.36608
Trial 1	M1-2	C-P	M	0:07:56.672-0:07:56.938	IT2	0.194627	8	0.729121
Trial 1	M1-2	C-P	M	0:07:56.938-0:07:57.204	IT2	0.545636	8	2.04408
Trial 1	M1-2	C-P	M	0:07:57.204-0:07:57.470	IT2	0.616671	8	2.3102
Trial 1	M1-2	C-P	M	0:07:57.470-0:07:57.736	IT2	0.485425	8	1.81852
Trial 1	M1-2	C-P	M	0:07:57.736-0:07:58.002	IT2	0.26918	8	1.00841
Trial 1	M1-2	C-P	M	0:07:58.002-0:07:58.268	IT2	0.214611	8	0.803989
Trial 1	M1-2	C-P	M	0:07:58.268-0:07:58.534	IT2	0.065056	8	0.243718
Trial 1	M1-2	C-P	M	0:07:58.534-0:07:58.800	IT2	0.175912	8	0.659008
Trial 1	M1-2	C-P	M	0:07:58.800-0:07:59.066	IT2	0.0434734	8	0.162861
Trial 1	M1-2	C-P	M	0:07:59.066-0:07:59.332	IT2	0.217915	8	0.81637
Trial 1	M1-2	C-P	M	0:07:59.332-0:07:59.598	IT2	0.274718	8	1.02916
Trial 1	M1-2	C-P	M	0:07:59.598-0:07:59.864	IT2	0.339822	8	1.27306
Trial 1	M1-2	C-P	M	0:07:59.864-0:08:00.130	IT2	0.503253	8	1.88531
Trial 1	M1-2	C-P	M	0:08:00.130-0:08:00.396	IT2	0.582757	8	2.18317
Trial 1	M1-2	C-P	M	0:08:00.396-0:08:00.662	IT2	0.452434	8	1.69493
Trial 1	M1-2	C-P	M	0:08:00.662-0:08:00.928	IT2	0.352673	8	1.3212
Trial 1	M1-2	C-P	M	0:08:00.928-0:08:01.194	IT2	1.15457	8	4.32532
Trial 1	M1-2	C-P	M	0:08:01.194-0:08:01.460	IT2	1.74958	8	6.55436
Trial 1	M1-2	C-P	M	0:08:01.460-0:08:01.726	IT2	0.640339	8	2.39887
Trial 1	M1-2	C-P	M	0:08:01.726-0:08:01.992	IT2	0.329385	8	1.23395
Trial 1	M1-2	C-P	M	0:08:01.992-0:08:02.258	IT2	1.64366	8	6.15755
Trial 1	M1-2	C-P	M	0:08:02.258-0:08:02.524	IT2	2.86633	8	10.738
Trial 1	M1-2	C-P	M	0:08:02.524-0:08:02.790	IT2	5.06057	8	18.9581
Trial 1	M1-2	C-P	M	0:08:02.790-0:08:03.056	IT2	1.77685	8	6.65656
Trial 1	M1-2	C-P	M	0:08:03.056-0:08:03.322	IT2	0.284328	8	1.06517
Trial 1	M1-2	C-P	M	0:08:03.322-0:08:03.588	IT2	1.09919	8	4.11781
Trial 1	M1-2	C-P	M	0:08:03.588-0:08:03.854	IT2	0.601144	8	2.25203
Trial 1	M1-2	C-P	M	0:08:03.854-0:08:04.120	IT2	0.898334	8	3.36537
Trial 1	M1-2	C-P	M	0:08:04.120-0:08:04.386	IT2	1.60633	8	6.01773
Trial 1	M1-2	C-P	M	0:08:04.386-0:08:04.652	IT2	2.24236	8	8.40039
Trial 1	M1-2	C-P	M	0:08:04.652-0:08:04.918	IT2	1.94512	7	8.32789
Trial 1	M1-2	C-P	M	0:08:04.918-0:08:05.184	IT2	1.24346	8	4.65831
Trial 1	M1-2	C-P	M	0:08:05.184-0:08:05.450	IT2	1.70901	8	6.40243
Trial 1	M1-2	C-P	M	0:08:05.450-0:08:05.716	IT2	1.05881	8	3.96657
Trial 1	M1-2	C-P	M	0:08:05.716-0:08:05.982	IT2	0.844597	8	3.16408
Trial 1	M1-2	C-P	M	0:08:05.982-0:08:06.248	IT2	0.953107	8	3.57056
Trial 1	M1-2	C-P	M	0:08:06.248-0:08:06.514	IT2	1.55614	8	5.82967
Trial 1	M1-2	C-P	M	0:08:06.514-0:08:06.780	IT2	1.19959	8	4.49397
Trial 1	M1-2	C-P	M	0:08:06.780-0:08:07.046	IT2	0.361403	8	1.3539
Trial 1	M1-2	C-P	M	0:08:07.046-0:08:07.312	IT2	0.399071	8	1.49502
Trial 1	M1-2	C-P	M	0:08:07.312-0:08:07.578	IT2	0.946742	8	3.54673
Trial 1	M1-2	C-P	M	0:08:07.578-0:08:07.844	IT2	1.57671	8	5.90672
Trial 1	M1-2	C-P	M	0:08:07.844-0:08:08.110	IT2	0.581191	8	2.17729
Trial 1	M1-2	C-P	M	0:08:08.110-0:08:08.376	IT2	0.685883	8	2.56949
Trial 1	M1-2	C-P	M	0:08:08.376-0:08:08.642	IT2	0.747264	8	2.79944
Trial 1	M1-2	C-P	M	0:08:08.642-0:08:08.908	IT2	0.500484	8	1.87492
Trial 1	M1-2	C-P	M	0:08:08.908-0:08:09.174	IT2	0.440997	8	1.65207
Trial 1	M1-2	C-P	M	0:08:09.174-0:08:09.440	IT2	0.413792	8	1.55017
Trial 1	M1-2	C-P	M	0:08:09.440-0:08:09.706	IT2	0.679328	8	2.54494
Trial 1	M1-2	C-P	M	0:08:09.706-0:08:09.972	IT2	1.63703	8	6.13273
Trial 1	M1-2	C-P	M	0:08:09.972-0:08:10.238	IT2	0.931179	8	3.48845
Trial 1	M1-2	C-P	M	0:08:10.238-0:08:10.504	IT2	0.467599	8	1.75173
Trial 1	M1-2	C-P	M	0:08:10.504-0:08:10.770	IT2	0.92041	8	3.44811
Trial 1	M1-2	C-P	M	0:08:10.770-0:08:11.036	IT2	0.22566	8	0.845376
Trial 1	M1-2	C-P	M	0:08:11.036-0:08:11.302	IT2	0.270954	8	1.01507
Trial 1	M1-2	C-P	M	0:08:11.302-0:08:11.568	IT2	0.683151	8	2.55924
Trial 1	M1-2	C-P	M	0:08:11.568-0:08:11.834	IT2	0.349374	8	1.30885
Trial 1	M1-2	C-P	M	0:08:11.834-0:08:12.100	IT2	0.711201	8	2.66435
Trial 1	M1-2	C-P	M	0:08:12.100-0:08:12.366	IT2	0.808894	8	3.03031
Trial 1	M1-2	C-P	M	0:08:12.366-0:08:12.632	IT2	2.42382	8	9.08023
Trial 1	M1-2	C-P	M	0:08:12.632-0:08:12.898	IT2	1.89784	8	7.1098
Trial 1	M1-2	C-P	M	0:08:12.898-0:08:13.164	IT2	1.78671	8	6.69344
Trial 1	M1-2	C-P	M	0:08:13.164-0:08:13.430	IT2	0.955998	8	3.5814
Trial 1	M1-2	C-P	M	0:08:13.430-0:08:13.696	IT2	1.08142	8	4.05128
Trial 1	M1-2	C-P	M	0:08:13.696-0:08:13.962	IT2	1.91397	8	7.17022
Trial 1	M1-2	C-P	M	0:08:13.962-0:08:14.228	IT2	2.51716	8	9.42989
Trial 1	M1-2	C-P	M	0:08:14.228-0:08:14.494	IT2	0.893449	7	3.82526
Trial 1	M1-2	C-P	M	0:08:14.494-0:08:14.760	IT2	1.16636	8	4.3695
Trial 1	M1-2	C-P	M	0:08:14.760-0:08:15.026	IT2	0.997846	8	3.73817
Trial 1	M1-2	C-P	M	0:08:15.026-0:08:15.292	IT2	2.80555	8	10.5103
Trial 1	M1-2	C-P	M	0:08:15.292-0:08:15.558	IT2	3.21216	8	12.0335
Trial 1	M1-2	C-P	M	0:08:15.558-0:08:15.824	IT2	2.16506	8	8.11084
Trial 1	M1-2	C-P	M	0:08:15.824-0:08:16.090	IT2	1.60499	8	6.01271
Trial 1	M1-2	C-P	M	0:08:16.090-0:08:16.356	IT2	0.853541	8	3.19759
Trial 1	M1-2	C-P	M	0:08:16.356-0:08:16.622	IT2	0.931687	8	3.49033
Trial 1	M1-2	C-P	M	0:08:16.622-0:08:16.888	IT2	0.915398	8	3.42931
Trial 1	M1-2	C-P	M	0:08:16.888-0:08:17.154	IT2	0.481077	8	1.80223
Trial 1	M1-2	C-P	M	0:08:17.154-0:08:17.420	IT2	0.481077	8	1.80224
Trial 1	M1-2	C-P	M	0:08:17.420-0:08:17.686	IT2	0.481077	8	1.80223
Trial 1	M1-2	C-P	M	0:08:17.686-0:08:17.952	IT2	0.481077	8	1.80223
Trial 1	M1-2	C-P	M	0:08:17.952-0:08:18.218	IT2	0.481077	8	1.80224
Trial 1	M1-2	C-P	M	0:08:18.218-0:08:18.484	IT2	0.481077	8	1.80223
Trial 1	M1-2	C-P	M	0:08:18.484-0:08:18.750	IT2	0.481077	8	1.80224
Trial 1	M1-2	C-P	M	0:08:18.750-0:08:19.016	IT2	0.481077	8	1.80223
Trial 1	M1-2	C-P	M	0:08:19.016-0:08:19.282	IT2	0.677009	8	2.53624
Trial 1	M1-2	C-P	M	0:08:19.282-0:08:19.548	IT2	0.705	8	2.64111
Trial 1	M1-2	C-P	M	0:08:19.548-0:08:19.814	IT2	0.356173	8	1.33431
Trial 1	M1-2	C-P	M	0:08:19.814-0:08:20.080	IT2	0.146878	8	0.550241
Trial 1	M1-2	C-P	M	0:08:20.080-0:08:20.346	IT2	0.146878	8	0.550239
Trial 1	M1-2	C-P	M	0:08:20.346-0:08:20.612	IT2	0.146878	8	0.550239
Trial 1	M1-2	C-P	M	0:08:20.612-0:08:20.878	IT2	0.146878	8	0.550241
Trial 1	M1-2	C-P	M	0:08:20.878-0:08:21.144	IT2	0.146878	8	0.550239
Trial 1	M1-2	C-P	M	0:08:21.144-0:08:21.410	IT2	0.146878	8	0.550241
Trial 1	M1-2	C-P	M	0:08:21.410-0:08:21.676	IT2	0.146878	8	0.550239
Trial 1	M1-2	C-P	M	0:08:21.676-0:08:21.942	IT2	0.146878	8	0.550239
Trial 1	M1-2	C-P	M	0:08:21.942-0:08:22.208	IT2	0.146878	8	0.550241
Trial 1	M1-2	C-P	M	0:08:22.208-0:08:22.474	IT2	0.146878	8	0.550239
Trial 1	M1-2	C-P	M	0:08:22.474-0:08:22.740	IT2	0.146878	8	0.550241
Trial 1	M1-2	C-P	M	0:08:22.740-0:08:23.006	IT2	0.146878	8	0.550239
Trial 1	M1-2	C-P	M	0:08:23.006-0:08:23.272	IT2	0.146878	8	0.550239
Trial 1	M1-2	C-P	M	0:08:23.272-0:08:23.538	IT2	0.146878	8	0.550241
Trial 1	M1-2	C-P	M	0:08:23.538-0:08:23.804	IT2	0.146878	8	0.550239
Trial 1	M1-2	C-P	M	0:08:23.804-0:08:24.070	IT2	0.128518	7	0.55024
Trial 1	M1-2	C-P	M	0:08:24.070-0:08:24.336	IT2	0.146878	8	0.550241
Trial 1	M1-2	C-P	M	0:08:24.336-0:08:24.602	IT2	0.146878	8	0.550239
Trial 1	M1-2	C-P	M	0:08:24.602-0:08:24.868	IT2	0.146878	8	0.550239
Trial 1	M1-2	C-P	M	0:08:24.868-0:08:25.134	IT2	0.146878	8	0.550241
Trial 1	M1-2	C-P	M	0:08:25.134-0:08:25.400	IT2	0.146878	8	0.550239
Trial 1	M1-2	C-P	M	0:08:25.400-0:08:25.666	IT2	4.884	8	18.2966
Trial 1	M1-2	C-P	M	0:08:25.666-0:08:25.932	IT2	1.53232	8	5.74045
Trial 1	M1-2	C-P	M	0:08:25.932-0:08:26.198	IT2	2.03949	8	7.64046
Trial 1	M1-2	C-P	M	0:08:26.198-0:08:26.464	IT2	0.933134	8	3.49578
Trial 1	M1-2	C-P	M	0:08:26.464-0:08:26.730	IT2	0.461059	8	1.72723
Trial 1	M1-2	C-P	M	0:08:26.730-0:08:26.996	IT2	2.15417	8	8.07007
Trial 1	M1-2	C-P	M	0:08:26.996-0:08:27.262	IT2	3.53639	8	13.2482
Trial 1	M1-2	C-P	M	0:08:27.262-0:08:27.528	IT2	6.4579	8	24.1929
Trial 1	M1-2	C-P	M	0:08:27.528-0:08:27.794	IT2	5.48435	8	20.5458
Trial 1	M1-2	C-P	M	0:08:27.794-0:08:28.060	IT2	1.18231	8	4.42923
Trial 1	M1-2	C-P	M	0:08:28.060-0:08:28.326	IT2	1.31324	8	4.91973
Trial 1	M1-2	C-P	M	0:08:28.326-0:08:28.592	IT2	0.624674	8	2.34019
Trial 1	M1-2	C-P	M	0:08:28.592-0:08:28.858	IT2	0.646953	8	2.42364
Trial 1	M1-2	C-P	M	0:08:28.858-0:08:29.124	IT2	1.01464	8	3.80109
Trial 1	M1-2	C-P	M	0:08:29.124-0:08:29.390	IT2	2.01377	8	7.54408
Trial 1	M1-2	C-P	M	0:08:29.390-0:08:29.656	IT2	3.64177	8	13.643
Trial 1	M1-2	C-P	M	0:08:29.656-0:08:29.922	IT2	2.61952	8	9.81336
Trial 1	M1-2	C-P	M	0:08:29.922-0:08:30.188	IT2	0.760895	8	2.85049
Trial 1	M1-2	C-P	M	0:08:30.188-0:08:30.454	IT2	2.38315	8	8.92788
Trial 1	M1-2	C-P	M	0:08:30.454-0:08:30.720	IT2	1.5533	8	5.81901
Trial 1	M1-2	C-P	M	0:08:30.720-0:08:30.986	IT2	2.12267	8	7.95205
Trial 1	M1-2	C-P	M	0:08:30.986-0:08:31.252	IT2	1.69702	8	6.35745
Trial 1	M1-2	C-P	M	0:08:31.252-0:08:31.518	IT2	1.20791	8	4.52514
Trial 1	M1-2	C-P	M	0:08:31.518-0:08:31.784	IT2	2.17278	8	8.13979
Trial 1	M1-2	C-P	M	0:08:31.784-0:08:32.050	IT2	1.94909	8	7.30176
Trial 1	M1-2	C-P	M	0:08:32.050-0:08:32.316	IT2	1.20157	8	4.5014
Trial 1	M1-2	C-P	M	0:08:32.316-0:08:32.582	IT2	1.38171	8	5.17624
Trial 1	M1-2	C-P	M	0:08:32.582-0:08:32.848	IT2	2.99275	8	11.2116
Trial 1	M1-2	C-P	M	0:08:32.848-0:08:33.114	IT2	2.52354	8	9.4538
Trial 1	M1-2	C-P	M	0:08:33.114-0:08:33.380	IT2	1.02084	7	4.37061
Trial 1	M1-2	C-P	M	0:08:33.380-0:08:33.646	IT2	2.15902	8	8.08821
Trial 1	M1-2	C-P	M	0:08:33.646-0:08:33.912	IT2	4.62392	8	17.3224
Trial 1	M1-2	C-P	M	0:08:33.912-0:08:34.178	IT2	1.51197	8	5.6642
Trial 1	M1-2	C-P	M	0:08:34.178-0:08:34.444	IT2	1.58937	8	5.9542
Trial 1	M1-2	C-P	M	0:08:34.444-0:08:34.710	IT2	0.72378	8	2.71145
Trial 1	M1-2	C-P	M	0:08:34.710-0:08:34.976	IT2	0.404914	8	1.5169
Trial 1	M1-2	C-P	M	0:08:34.976-0:08:35.242	IT2	0.198869	8	0.745014
Trial 1	M1-2	C-P	M	0:08:35.242-0:08:35.508	IT2	0.218662	8	0.819167
Trial 1	M1-2	C-P	M	0:08:35.508-0:08:35.774	IT2	0.413664	8	1.5497
Trial 1	M1-2	C-P	M	0:08:35.774-0:08:36.040	IT2	1.74048	8	6.52023
Trial 1	M1-2	C-P	M	0:08:36.040-0:08:36.306	IT2	2.46282	8	9.22634
Trial 1	M1-2	C-P	M	0:08:36.306-0:08:36.572	IT2	1.65909	8	6.21535
Trial 1	M1-2	C-P	M	0:08:36.572-0:08:36.838	IT2	1.62507	8	6.08793
Trial 1	M1-2	C-P	M	0:08:36.838-0:08:37.104	IT2	1.65574	8	6.20286
Trial 1	M1-2	C-P	M	0:08:37.104-0:08:37.370	IT2	0.462141	8	1.73129
Trial 1	M1-2	C-P	M	0:08:37.370-0:08:37.636	IT2	0.348778	8	1.30661
Trial 1	M1-2	C-P	M	0:08:37.636-0:08:37.902	IT2	0.349186	8	1.30813
Trial 1	M1-2	C-P	M	0:08:37.902-0:08:38.168	IT2	0.148975	8	0.558101
Trial 1	M1-2	C-P	M	0:08:38.168-0:08:38.434	IT2	0.226744	8	0.849441
Trial 1	M1-2	C-P	M	0:08:38.434-0:08:38.700	IT2	0.150336	8	0.563195
Trial 1	M1-2	C-P	M	0:08:38.700-0:08:38.966	IT2	0.463428	8	1.73611
Trial 1	M1-2	C-P	M	0:08:38.966-0:08:39.232	IT2	0.616374	8	2.30911
Trial 1	M1-2	C-P	M	0:08:39.232-0:08:39.498	IT2	0.17308	8	0.648399
Trial 1	M1-2	C-P	M	0:08:39.498-0:08:39.764	IT2	0.246748	8	0.924377
Trial 1	M1-2	C-P	M	0:08:39.764-0:08:40.030	IT2	0.0833162	8	0.312123
Trial 1	M1-2	C-P	M	0:08:40.030-0:08:40.296	IT2	0.399611	8	1.49704
Trial 1	M1-2	C-P	M	0:08:40.296-0:08:40.562	IT2	0.390452	8	1.46274
Trial 1	M1-2	C-P	M	0:08:40.562-0:08:40.828	IT2	0.7438	8	2.78645
Trial 1	M1-2	C-P	M	0:08:40.828-0:08:41.094	IT2	0.984727	8	3.68904
Trial 1	M1-2	C-P	M	0:08:41.094-0:08:41.360	IT2	1.47282	8	5.51756
Trial 1	M1-2	C-P	M	0:08:41.360-0:08:41.626	IT2	1.64504	8	6.16272
Trial 1	M1-2	C-P	M	0:08:41.626-0:08:41.892	IT2	0.518926	8	1.94403
Trial 1	M1-2	C-P	M	0:08:41.892-0:08:42.158	IT2	0.781464	8	2.92756
Trial 1	M1-2	C-P	M	0:08:42.158-0:08:42.424	IT2	0.640545	8	2.39964
Trial 1	M1-2	C-P	M	0:08:42.424-0:08:42.690	IT2	0.317218	8	1.18838
Trial 1	M1-2	C-P	M	0:08:42.690-0:08:42.956	IT2	0.236237	7	1.01144
Trial 1	M1-2	C-P	M	0:08:42.956-0:08:43.222	IT2	0.44576	8	1.66992
Trial 1	M1-2	C-P	M	0:08:43.222-0:08:43.488	IT2	0.161255	8	0.604107
Trial 1	M1-2	C-P	M	0:08:43.488-0:08:43.754	IT2	0.201349	8	0.754301
Trial 1	M1-2	C-P	M	0:08:43.754-0:08:44.020	IT2	0.256075	8	0.959326
Trial 1	M1-2	C-P	M	0:08:44.020-0:08:44.286	IT2	0.245528	8	0.919815
Trial 1	M1-2	C-P	M	0:08:44.286-0:08:44.552	IT2	1.07999	8	4.04593
Trial 1	M1-2	C-P	M	0:08:44.552-0:08:44.818	IT2	0.760638	8	2.84956
Trial 1	M1-2	C-P	M	0:08:44.818-0:08:45.084	IT2	0.608063	8	2.27795
Trial 1	M1-2	C-P	M	0:08:45.084-0:08:45.350	IT2	0.272376	8	1.02039
Trial 1	M1-2	C-P	M	0:08:45.350-0:08:45.616	IT2	0.252286	8	0.945125
Trial 1	M1-2	C-P	M	0:08:45.616-0:08:45.882	IT2	0.489433	8	1.83353
Trial 1	M1-2	C-P	M	0:08:45.882-0:08:46.148	IT2	0.54164	8	2.02913
Trial 1	M1-2	C-P	M	0:08:46.148-0:08:46.414	IT2	0.429267	8	1.60814
Trial 1	M1-2	C-P	M	0:08:46.414-0:08:46.680	IT2	0.532983	8	1.9967
Trial 1	M1-2	C-P	M	0:08:46.680-0:08:46.946	IT2	4.00323	8	14.9971
Trial 1	M1-2	C-P	M	0:08:46.946-0:08:47.212	IT2	2.25116	8	8.43339
Trial 1	M1-2	C-P	M	0:08:47.212-0:08:47.478	IT2	2.69498	8	10.0961
Trial 1	M1-2	C-P	M	0:08:47.478-0:08:47.744	IT2	0.794921	8	2.97795
Trial 1	M1-2	C-P	M	0:08:47.744-0:08:48.010	IT2	1.35351	8	5.07058
Trial 1	M1-2	C-P	M	0:08:48.010-0:08:48.276	IT2	0.935712	8	3.50539
Trial 1	M1-2	C-P	M	0:08:48.276-0:08:48.542	IT2	0.35613	8	1.33415
Trial 1	M1-2	C-P	M	0:08:48.542-0:08:48.808	IT2	0.299457	8	1.12185
Trial 1	M1-2	C-P	M	0:08:48.808-0:08:49.074	IT2	0.800002	8	2.99701
Trial 1	M1-2	C-P	M	0:08:49.074-0:08:49.340	IT2	1.66191	8	6.22595
Trial 1	M1-2	C-P	M	0:08:49.340-0:08:49.606	IT2	1.02268	8	3.8312
Trial 1	M1-2	C-P	M	0:08:49.606-0:08:49.872	IT2	0.25265	8	0.946488
Trial 1	M1-2	C-P	M	0:08:49.872-0:08:50.138	IT2	0.711576	8	2.66576
Trial 1	M1-2	C-P	M	0:08:50.138-0:08:50.404	IT2	1.29692	8	4.8586
Trial 1	M1-2	C-P	M	0:08:50.404-0:08:50.670	IT2	2.05397	8	7.69474
Trial 1	M1-2	C-P	M	0:08:50.670-0:08:50.936	IT2	2.86	8	10.7142
[truncated: 121,364 more rows]

## Sheet: Day 2
Raw velocity data, extracted via ethovision, which is fed to R source code 1 to detect and extract darts, and to produce velocity traces
Showing Data from Habituation Day 2 for all animals in Experiment 4
Used to calculate Darts/minute as seen in Figure 8-figure supplement 1
Trial	Animal	Group	Sex	TimeStamp	StimPeriod	Distance	Samples	Velocity
Trial 1	M1-2	C-P	M	Start-0:00:00.266	BL	0.43882	7	1.87878
Trial 1	M1-2	C-P	M	0:00:00.266-0:00:00.532	BL	0.640257	8	2.39857
Trial 1	M1-2	C-P	M	0:00:00.532-0:00:00.798	BL	0.4639	8	1.73788
Trial 1	M1-2	C-P	M	0:00:00.798-0:00:01.064	BL	1.00139	8	3.75148
Trial 1	M1-2	C-P	M	0:00:01.064-0:00:01.330	BL	0.921301	8	3.45143
Trial 1	M1-2	C-P	M	0:00:01.330-0:00:01.596	BL	0.632613	8	2.36995
Trial 1	M1-2	C-P	M	0:00:01.596-0:00:01.862	BL	0.994893	8	3.72711
Trial 1	M1-2	C-P	M	0:00:01.862-0:00:02.128	BL	0.693856	8	2.59937
Trial 1	M1-2	C-P	M	0:00:02.128-0:00:02.394	BL	0.496617	8	1.86045
Trial 1	M1-2	C-P	M	0:00:02.394-0:00:02.660	BL	0.624196	8	2.33839
Trial 1	M1-2	C-P	M	0:00:02.660-0:00:02.926	BL	1.32435	8	4.96135
Trial 1	M1-2	C-P	M	0:00:02.926-0:00:03.192	BL	0.688443	8	2.57907
Trial 1	M1-2	C-P	M	0:00:03.192-0:00:03.458	BL	0.426054	8	1.5961
Trial 1	M1-2	C-P	M	0:00:03.458-0:00:03.724	BL	0.439569	8	1.64673
Trial 1	M1-2	C-P	M	0:00:03.724-0:00:03.990	BL	1.20816	8	4.52605
Trial 1	M1-2	C-P	M	0:00:03.990-0:00:04.256	BL	1.18083	8	4.42366
Trial 1	M1-2	C-P	M	0:00:04.256-0:00:04.522	BL	0.909541	8	3.40735
Trial 1	M1-2	C-P	M	0:00:04.522-0:00:04.788	BL	0.666302	8	2.49613
Trial 1	M1-2	C-P	M	0:00:04.788-0:00:05.054	BL	0.564593	8	2.1151
Trial 1	M1-2	C-P	M	0:00:05.054-0:00:05.320	BL	0.91972	8	3.44551
Trial 1	M1-2	C-P	M	0:00:05.320-0:00:05.586	BL	0.355161	8	1.33053
Trial 1	M1-2	C-P	M	0:00:05.586-0:00:05.852	BL	0.710472	8	2.66161
Trial 1	M1-2	C-P	M	0:00:05.852-0:00:06.118	BL	0.398463	8	1.49273
Trial 1	M1-2	C-P	M	0:00:06.118-0:00:06.384	BL	0.816734	8	3.05968
Trial 1	M1-2	C-P	M	0:00:06.384-0:00:06.650	BL	0.531178	8	1.98993
Trial 1	M1-2	C-P	M	0:00:06.650-0:00:06.916	BL	0.498789	8	1.8686
Trial 1	M1-2	C-P	M	0:00:06.916-0:00:07.182	BL	0.402743	8	1.50877
Trial 1	M1-2	C-P	M	0:00:07.182-0:00:07.448	BL	0.829426	8	3.10726
Trial 1	M1-2	C-P	M	0:00:07.448-0:00:07.714	BL	0.582062	8	2.18056
Trial 1	M1-2	C-P	M	0:00:07.714-0:00:07.980	BL	0.364219	8	1.36445
Trial 1	M1-2	C-P	M	0:00:07.980-0:00:08.246	BL	0.843787	8	3.16104
Trial 1	M1-2	C-P	M	0:00:08.246-0:00:08.512	BL	0.45078	8	1.68873
Trial 1	M1-2	C-P	M	0:00:08.512-0:00:08.778	BL	0.73807	8	2.765
Trial 1	M1-2	C-P	M	0:00:08.778-0:00:09.044	BL	0.771353	8	2.88968
Trial 1	M1-2	C-P	M	0:00:09.044-0:00:09.310	BL	0.79967	8	2.99577
Trial 1	M1-2	C-P	M	0:00:09.310-0:00:09.576	BL	0.426473	7	1.82592
Trial 1	M1-2	C-P	M	0:00:09.576-0:00:09.842	BL	0.315847	8	1.18325
Trial 1	M1-2	C-P	M	0:00:09.842-0:00:10.108	BL	1.16021	8	4.34646
Trial 1	M1-2	C-P	M	0:00:10.108-0:00:10.374	BL	0.791061	8	2.9635
Trial 1	M1-2	C-P	M	0:00:10.374-0:00:10.640	BL	0.402882	8	1.5093
Trial 1	M1-2	C-P	M	0:00:10.640-0:00:10.906	BL	0.794202	8	2.97529
Trial 1	M1-2	C-P	M	0:00:10.906-0:00:11.172	BL	0.620145	8	2.32322
Trial 1	M1-2	C-P	M	0:00:11.172-0:00:11.438	BL	1.00518	8	3.76564
Trial 1	M1-2	C-P	M	0:00:11.438-0:00:11.704	BL	1.39372	8	5.22122
Trial 1	M1-2	C-P	M	0:00:11.704-0:00:11.970	BL	0.973863	8	3.64834
Trial 1	M1-2	C-P	M	0:00:11.970-0:00:12.236	BL	0.617189	8	2.31214
Trial 1	M1-2	C-P	M	0:00:12.236-0:00:12.502	BL	1.172	8	4.39068
Trial 1	M1-2	C-P	M	0:00:12.502-0:00:12.768	BL	1.32326	8	4.95723
Trial 1	M1-2	C-P	M	0:00:12.768-0:00:13.034	BL	0.647893	8	2.42717
Trial 1	M1-2	C-P	M	0:00:13.034-0:00:13.300	BL	0.368897	8	1.38199
Trial 1	M1-2	C-P	M	0:00:13.300-0:00:13.566	BL	0.751721	8	2.81612
Trial 1	M1-2	C-P	M	0:00:13.566-0:00:13.832	BL	1.2239	8	4.5851
Trial 1	M1-2	C-P	M	0:00:13.832-0:00:14.098	BL	0.940958	8	3.52507
Trial 1	M1-2	C-P	M	0:00:14.098-0:00:14.364	BL	2.52771	8	9.46942
Trial 1	M1-2	C-P	M	0:00:14.364-0:00:14.630	BL	0.577094	8	2.16194
Trial 1	M1-2	C-P	M	0:00:14.630-0:00:14.896	BL	0.719264	8	2.69454
Trial 1	M1-2	C-P	M	0:00:14.896-0:00:15.162	BL	0.989677	8	3.70759
Trial 1	M1-2	C-P	M	0:00:15.162-0:00:15.428	BL	0.696277	8	2.60842
Trial 1	M1-2	C-P	M	0:00:15.428-0:00:15.694	BL	0.345613	8	1.29474
Trial 1	M1-2	C-P	M	0:00:15.694-0:00:15.960	BL	0.415171	8	1.55534
Trial 1	M1-2	C-P	M	0:00:15.960-0:00:16.226	BL	0.723776	8	2.71146
Trial 1	M1-2	C-P	M	0:00:16.226-0:00:16.492	BL	0.306094	8	1.14672
Trial 1	M1-2	C-P	M	0:00:16.492-0:00:16.758	BL	0.294814	8	1.10444
Trial 1	M1-2	C-P	M	0:00:16.758-0:00:17.024	BL	0.573959	8	2.15019
Trial 1	M1-2	C-P	M	0:00:17.024-0:00:17.290	BL	2.05552	8	7.70046
Trial 1	M1-2	C-P	M	0:00:17.290-0:00:17.556	BL	0.433117	8	1.62256
Trial 1	M1-2	C-P	M	0:00:17.556-0:00:17.822	BL	0.414906	8	1.55434
Trial 1	M1-2	C-P	M	0:00:17.822-0:00:18.088	BL	0.414906	8	1.55434
Trial 1	M1-2	C-P	M	0:00:18.088-0:00:18.354	BL	0.936965	8	3.5101
Trial 1	M1-2	C-P	M	0:00:18.354-0:00:18.620	BL	0.937149	8	3.5108
Trial 1	M1-2	C-P	M	0:00:18.620-0:00:18.886	BL	0.787015	8	2.94834
Trial 1	M1-2	C-P	M	0:00:18.886-0:00:19.152	BL	0.887251	7	3.79868
Trial 1	M1-2	C-P	M	0:00:19.152-0:00:19.418	BL	0.525134	8	1.96729
Trial 1	M1-2	C-P	M	0:00:19.418-0:00:19.684	BL	0.749816	8	2.80899
Trial 1	M1-2	C-P	M	0:00:19.684-0:00:19.950	BL	1.2652	8	4.73978
Trial 1	M1-2	C-P	M	0:00:19.950-0:00:20.216	BL	1.07679	8	4.03396
Trial 1	M1-2	C-P	M	0:00:20.216-0:00:20.482	BL	0.813441	8	3.04739
Trial 1	M1-2	C-P	M	0:00:20.482-0:00:20.748	BL	1.012	8	3.79119
Trial 1	M1-2	C-P	M	0:00:20.748-0:00:21.014	BL	0.954429	8	3.57553
Trial 1	M1-2	C-P	M	0:00:21.014-0:00:21.280	BL	1.0969	8	4.10927
Trial 1	M1-2	C-P	M	0:00:21.280-0:00:21.546	BL	1.26528	8	4.74005
Trial 1	M1-2	C-P	M	0:00:21.546-0:00:21.812	BL	0.381519	8	1.42927
Trial 1	M1-2	C-P	M	0:00:21.812-0:00:22.078	BL	1.90933	8	7.15282
Trial 1	M1-2	C-P	M	0:00:22.078-0:00:22.344	BL	0.924585	8	3.46372
Trial 1	M1-2	C-P	M	0:00:22.344-0:00:22.610	BL	0.713193	8	2.67181
Trial 1	M1-2	C-P	M	0:00:22.610-0:00:22.876	BL	1.0158	8	3.80546
Trial 1	M1-2	C-P	M	0:00:22.876-0:00:23.142	BL	0.378209	8	1.41687
Trial 1	M1-2	C-P	M	0:00:23.142-0:00:23.408	BL	0.0785243	8	0.294172
Trial 1	M1-2	C-P	M	0:00:23.408-0:00:23.674	BL	0.413108	8	1.5476
Trial 1	M1-2	C-P	M	0:00:23.674-0:00:23.940	BL	2.03647	8	7.62914
Trial 1	M1-2	C-P	M	0:00:23.940-0:00:24.206	BL	3.63369	8	13.6127
Trial 1	M1-2	C-P	M	0:00:24.206-0:00:24.472	BL	3.77208	8	14.1311
Trial 1	M1-2	C-P	M	0:00:24.472-0:00:24.738	BL	4.482	8	16.7907
Trial 1	M1-2	C-P	M	0:00:24.738-0:00:25.004	BL	2.71194	8	10.1596
Trial 1	M1-2	C-P	M	0:00:25.004-0:00:25.270	BL	1.38754	8	5.19808
Trial 1	M1-2	C-P	M	0:00:25.270-0:00:25.536	BL	0.517489	8	1.93864
Trial 1	M1-2	C-P	M	0:00:25.536-0:00:25.802	BL	0.683519	8	2.56063
Trial 1	M1-2	C-P	M	0:00:25.802-0:00:26.068	BL	0.377834	8	1.41546
Trial 1	M1-2	C-P	M	0:00:26.068-0:00:26.334	BL	1.1191	8	4.19245
Trial 1	M1-2	C-P	M	0:00:26.334-0:00:26.600	BL	1.19686	8	4.48373
Trial 1	M1-2	C-P	M	0:00:26.600-0:00:26.866	BL	0.727131	8	2.724
Trial 1	M1-2	C-P	M	0:00:26.866-0:00:27.132	BL	0.516408	8	1.93459
Trial 1	M1-2	C-P	M	0:00:27.132-0:00:27.398	BL	0.523389	8	1.96075
Trial 1	M1-2	C-P	M	0:00:27.398-0:00:27.664	BL	0.26701	8	1.00028
Trial 1	M1-2	C-P	M	0:00:27.664-0:00:27.930	BL	0.207674	8	0.777997
Trial 1	M1-2	C-P	M	0:00:27.930-0:00:28.196	BL	0.251356	8	0.941638
Trial 1	M1-2	C-P	M	0:00:28.196-0:00:28.462	BL	0.107055	8	0.401055
Trial 1	M1-2	C-P	M	0:00:28.462-0:00:28.728	BL	0.086335	7	0.369639
Trial 1	M1-2	C-P	M	0:00:28.728-0:00:28.994	BL	0.308632	8	1.15622
Trial 1	M1-2	C-P	M	0:00:28.994-0:00:29.260	BL	0.232118	8	0.869573
Trial 1	M1-2	C-P	M	0:00:29.260-0:00:29.526	BL	0.448499	8	1.6802
Trial 1	M1-2	C-P	M	0:00:29.526-0:00:29.792	BL	0.408939	8	1.53198
Trial 1	M1-2	C-P	M	0:00:29.792-0:00:30.058	BL	0.33404	8	1.2514
Trial 1	M1-2	C-P	M	0:00:30.058-0:00:30.324	BL	0.256774	8	0.961938
Trial 1	M1-2	C-P	M	0:00:30.324-0:00:30.590	BL	0.351527	8	1.3169
Trial 1	M1-2	C-P	M	0:00:30.590-0:00:30.856	BL	0.312483	8	1.17064
Trial 1	M1-2	C-P	M	0:00:30.856-0:00:31.122	BL	0.254927	8	0.955018
Trial 1	M1-2	C-P	M	0:00:31.122-0:00:31.388	BL	0.290941	8	1.08994
Trial 1	M1-2	C-P	M	0:00:31.388-0:00:31.654	BL	0.278661	8	1.04393
Trial 1	M1-2	C-P	M	0:00:31.654-0:00:31.920	BL	0.193476	8	0.724807
Trial 1	M1-2	C-P	M	0:00:31.920-0:00:32.186	BL	0.19577	8	0.733405
Trial 1	M1-2	C-P	M	0:00:32.186-0:00:32.452	BL	0.169045	8	0.633284
Trial 1	M1-2	C-P	M	0:00:32.452-0:00:32.718	BL	0.164386	8	0.61583
Trial 1	M1-2	C-P	M	0:00:32.718-0:00:32.984	BL	0.143874	8	0.538989
Trial 1	M1-2	C-P	M	0:00:32.984-0:00:33.250	BL	0.0814722	8	0.305213
Trial 1	M1-2	C-P	M	0:00:33.250-0:00:33.516	BL	0.109983	8	0.412029
Trial 1	M1-2	C-P	M	0:00:33.516-0:00:33.782	BL	0.240614	8	0.901402
Trial 1	M1-2	C-P	M	0:00:33.782-0:00:34.048	BL	0.0988251	8	0.370221
Trial 1	M1-2	C-P	M	0:00:34.048-0:00:34.314	BL	0.208024	8	0.779307
Trial 1	M1-2	C-P	M	0:00:34.314-0:00:34.580	BL	0.0986976	8	0.369744
Trial 1	M1-2	C-P	M	0:00:34.580-0:00:34.846	BL	0.14596	8	0.546806
Trial 1	M1-2	C-P	M	0:00:34.846-0:00:35.112	BL	0.144167	8	0.540086
Trial 1	M1-2	C-P	M	0:00:35.112-0:00:35.378	BL	0.184619	8	0.691625
Trial 1	M1-2	C-P	M	0:00:35.378-0:00:35.644	BL	0.292249	8	1.09484
Trial 1	M1-2	C-P	M	0:00:35.644-0:00:35.910	BL	0.600866	8	2.251
Trial 1	M1-2	C-P	M	0:00:35.910-0:00:36.176	BL	0.397505	8	1.48916
Trial 1	M1-2	C-P	M	0:00:36.176-0:00:36.442	BL	0.183499	8	0.687432
Trial 1	M1-2	C-P	M	0:00:36.442-0:00:36.708	BL	0.240873	8	0.90237
Trial 1	M1-2	C-P	M	0:00:36.708-0:00:36.974	BL	0.0581636	8	0.217898
Trial 1	M1-2	C-P	M	0:00:36.974-0:00:37.240	BL	0.0717558	8	0.268814
Trial 1	M1-2	C-P	M	0:00:37.240-0:00:37.506	BL	0.0770583	8	0.288683
Trial 1	M1-2	C-P	M	0:00:37.506-0:00:37.772	BL	0.158773	8	0.594805
Trial 1	M1-2	C-P	M	0:00:37.772-0:00:38.038	BL	0.274182	7	1.17389
Trial 1	M1-2	C-P	M	0:00:38.038-0:00:38.304	BL	0.422056	8	1.58114
Trial 1	M1-2	C-P	M	0:00:38.304-0:00:38.570	BL	0.423182	8	1.58535
Trial 1	M1-2	C-P	M	0:00:38.570-0:00:38.836	BL	0.579943	8	2.17262
Trial 1	M1-2	C-P	M	0:00:38.836-0:00:39.102	BL	0.612799	8	2.2957
Trial 1	M1-2	C-P	M	0:00:39.102-0:00:39.368	BL	0.521461	8	1.95352
Trial 1	M1-2	C-P	M	0:00:39.368-0:00:39.634	BL	0.327154	8	1.22561
Trial 1	M1-2	C-P	M	0:00:39.634-0:00:39.900	BL	0.0780314	8	0.292322
Trial 1	M1-2	C-P	M	0:00:39.900-0:00:40.166	BL	0.180384	8	0.675761
Trial 1	M1-2	C-P	M	0:00:40.166-0:00:40.432	BL	0.522168	8	1.95617
Trial 1	M1-2	C-P	M	0:00:40.432-0:00:40.698	BL	0.433856	8	1.62533
Trial 1	M1-2	C-P	M	0:00:40.698-0:00:40.964	BL	0.353746	8	1.32523
Trial 1	M1-2	C-P	M	0:00:40.964-0:00:41.230	BL	0.625494	8	2.34325
Trial 1	M1-2	C-P	M	0:00:41.230-0:00:41.496	BL	0.318373	8	1.1927
Trial 1	M1-2	C-P	M	0:00:41.496-0:00:41.762	BL	0.636215	8	2.38341
Trial 1	M1-2	C-P	M	0:00:41.762-0:00:42.028	BL	0.445263	8	1.66806
Trial 1	M1-2	C-P	M	0:00:42.028-0:00:42.294	BL	0.319115	8	1.19549
Trial 1	M1-2	C-P	M	0:00:42.294-0:00:42.560	BL	0.357682	8	1.33997
Trial 1	M1-2	C-P	M	0:00:42.560-0:00:42.826	BL	0.382153	8	1.43164
Trial 1	M1-2	C-P	M	0:00:42.826-0:00:43.092	BL	0.603154	8	2.25957
Trial 1	M1-2	C-P	M	0:00:43.092-0:00:43.358	BL	0.215557	8	0.807527
Trial 1	M1-2	C-P	M	0:00:43.358-0:00:43.624	BL	0.118256	8	0.443017
Trial 1	M1-2	C-P	M	0:00:43.624-0:00:43.890	BL	0.102981	8	0.385793
Trial 1	M1-2	C-P	M	0:00:43.890-0:00:44.156	BL	0.0302049	8	0.113156
Trial 1	M1-2	C-P	M	0:00:44.156-0:00:44.422	BL	0.186296	8	0.697909
Trial 1	M1-2	C-P	M	0:00:44.422-0:00:44.688	BL	0.235406	8	0.881888
Trial 1	M1-2	C-P	M	0:00:44.688-0:00:44.954	BL	0.243216	8	0.91115
Trial 1	M1-2	C-P	M	0:00:44.954-0:00:45.220	BL	0.0980137	8	0.367182
Trial 1	M1-2	C-P	M	0:00:45.220-0:00:45.486	BL	0.0976085	8	0.365663
Trial 1	M1-2	C-P	M	0:00:45.486-0:00:45.752	BL	0.0934652	8	0.350143
Trial 1	M1-2	C-P	M	0:00:45.752-0:00:46.018	BL	0.0493293	8	0.184798
Trial 1	M1-2	C-P	M	0:00:46.018-0:00:46.284	BL	0.101173	8	0.379021
Trial 1	M1-2	C-P	M	0:00:46.284-0:00:46.550	BL	0.260438	8	0.975663
Trial 1	M1-2	C-P	M	0:00:46.550-0:00:46.816	BL	0.314547	8	1.17837
Trial 1	M1-2	C-P	M	0:00:46.816-0:00:47.082	BL	0.173991	8	0.651811
Trial 1	M1-2	C-P	M	0:00:47.082-0:00:47.348	BL	0.369221	8	1.38319
Trial 1	M1-2	C-P	M	0:00:47.348-0:00:47.614	BL	0.427237	7	1.82917
Trial 1	M1-2	C-P	M	0:00:47.614-0:00:47.880	BL	0.535765	8	2.00711
Trial 1	M1-2	C-P	M	0:00:47.880-0:00:48.146	BL	0.330547	8	1.23831
Trial 1	M1-2	C-P	M	0:00:48.146-0:00:48.412	BL	0.182751	8	0.684631
Trial 1	M1-2	C-P	M	0:00:48.412-0:00:48.678	BL	0.308492	8	1.15569
Trial 1	M1-2	C-P	M	0:00:48.678-0:00:48.944	BL	0.380859	8	1.42679
Trial 1	M1-2	C-P	M	0:00:48.944-0:00:49.210	BL	0.331915	8	1.24344
Trial 1	M1-2	C-P	M	0:00:49.210-0:00:49.476	BL	0.298385	8	1.11782
Trial 1	M1-2	C-P	M	0:00:49.476-0:00:49.742	BL	0.274481	8	1.02827
Trial 1	M1-2	C-P	M	0:00:49.742-0:00:50.008	BL	0.212876	8	0.797487
Trial 1	M1-2	C-P	M	0:00:50.008-0:00:50.274	BL	0.343351	8	1.28628
Trial 1	M1-2	C-P	M	0:00:50.274-0:00:50.540	BL	0.462341	8	1.73204
Trial 1	M1-2	C-P	M	0:00:50.540-0:00:50.806	BL	0.189164	8	0.708657
Trial 1	M1-2	C-P	M	0:00:50.806-0:00:51.072	BL	0.170785	8	0.639798
Trial 1	M1-2	C-P	M	0:00:51.072-0:00:51.338	BL	0.107581	8	0.403024
Trial 1	M1-2	C-P	M	0:00:51.338-0:00:51.604	BL	0.142831	8	0.535081
Trial 1	M1-2	C-P	M	0:00:51.604-0:00:51.870	BL	0.155134	8	0.58117
Trial 1	M1-2	C-P	M	0:00:51.870-0:00:52.136	BL	0.47204	8	1.76837
Trial 1	M1-2	C-P	M	0:00:52.136-0:00:52.402	BL	0.497577	8	1.86404
Trial 1	M1-2	C-P	M	0:00:52.402-0:00:52.668	BL	0.476728	8	1.78595
Trial 1	M1-2	C-P	M	0:00:52.668-0:00:52.934	BL	0.439511	8	1.64652
Trial 1	M1-2	C-P	M	0:00:52.934-0:00:53.200	BL	0.354894	8	1.32952
Trial 1	M1-2	C-P	M	0:00:53.200-0:00:53.466	BL	0.144191	8	0.540174
Trial 1	M1-2	C-P	M	0:00:53.466-0:00:53.732	BL	0.094638	8	0.354537
Trial 1	M1-2	C-P	M	0:00:53.732-0:00:53.998	BL	0.681186	8	2.55189
Trial 1	M1-2	C-P	M	0:00:53.998-0:00:54.264	BL	0.468233	8	1.75411
Trial 1	M1-2	C-P	M	0:00:54.264-0:00:54.530	BL	0.154907	8	0.58032
Trial 1	M1-2	C-P	M	0:00:54.530-0:00:54.796	BL	0.22987	8	0.861151
Trial 1	M1-2	C-P	M	0:00:54.796-0:00:55.062	BL	0.281149	8	1.05325
Trial 1	M1-2	C-P	M	0:00:55.062-0:00:55.328	BL	0.171147	8	0.641163
Trial 1	M1-2	C-P	M	0:00:55.328-0:00:55.594	BL	0.0758117	8	0.284009
Trial 1	M1-2	C-P	M	0:00:55.594-0:00:55.860	BL	0.0880153	8	0.329729
Trial 1	M1-2	C-P	M	0:00:55.860-0:00:56.126	BL	0.124131	8	0.465023
Trial 1	M1-2	C-P	M	0:00:56.126-0:00:56.392	BL	0.0924052	8	0.346172
Trial 1	M1-2	C-P	M	0:00:56.392-0:00:56.658	BL	0.412957	8	1.54705
Trial 1	M1-2	C-P	M	0:00:56.658-0:00:56.924	BL	0.307244	8	1.15101
Trial 1	M1-2	C-P	M	0:00:56.924-0:00:57.190	BL	0.199908	7	0.855888
Trial 1	M1-2	C-P	M	0:00:57.190-0:00:57.456	BL	0.202475	8	0.758523
Trial 1	M1-2	C-P	M	0:00:57.456-0:00:57.722	BL	0.187863	8	0.703779
Trial 1	M1-2	C-P	M	0:00:57.722-0:00:57.988	BL	0.19537	8	0.731906
Trial 1	M1-2	C-P	M	0:00:57.988-0:00:58.254	BL	0.137877	8	0.516519
Trial 1	M1-2	C-P	M	0:00:58.254-0:00:58.520	BL	0.0417475	8	0.156396
Trial 1	M1-2	C-P	M	0:00:58.520-0:00:58.786	BL	0.09774	8	0.366159
Trial 1	M1-2	C-P	M	0:00:58.786-0:00:59.052	BL	0.336429	8	1.26035
Trial 1	M1-2	C-P	M	0:00:59.052-0:00:59.318	BL	0.121483	8	0.455103
Trial 1	M1-2	C-P	M	0:00:59.318-0:00:59.584	BL	0.161137	8	0.603658
Trial 1	M1-2	C-P	M	0:00:59.584-0:00:59.850	BL	0.160499	8	0.601269
Trial 1	M1-2	C-P	M	0:00:59.850-0:01:00.116	BL	0.0894213	8	0.334996
Trial 1	M1-2	C-P	M	0:01:00.116-0:01:00.382	BL	0.0794211	8	0.297532
Trial 1	M1-2	C-P	M	0:01:00.382-0:01:00.648	BL	0.270707	8	1.01414
Trial 1	M1-2	C-P	M	0:01:00.648-0:01:00.914	BL	0.294442	8	1.10305
Trial 1	M1-2	C-P	M	0:01:00.914-0:01:01.180	BL	0.160003	8	0.599408
Trial 1	M1-2	C-P	M	0:01:01.180-0:01:01.446	BL	0.175266	8	0.656588
Trial 1	M1-2	C-P	M	0:01:01.446-0:01:01.712	BL	0.264175	8	0.989661
Trial 1	M1-2	C-P	M	0:01:01.712-0:01:01.978	BL	0.733318	8	2.74719
Trial 1	M1-2	C-P	M	0:01:01.978-0:01:02.244	BL	0.369737	8	1.38513
Trial 1	M1-2	C-P	M	0:01:02.244-0:01:02.510	BL	0.269822	8	1.01081
Trial 1	M1-2	C-P	M	0:01:02.510-0:01:02.776	BL	0.323662	8	1.21252
Trial 1	M1-2	C-P	M	0:01:02.776-0:01:03.042	BL	0.7522	8	2.81793
Trial 1	M1-2	C-P	M	0:01:03.042-0:01:03.308	BL	0.438965	8	1.64448
Trial 1	M1-2	C-P	M	0:01:03.308-0:01:03.574	BL	0.361955	8	1.35597
Trial 1	M1-2	C-P	M	0:01:03.574-0:01:03.840	BL	0.321099	8	1.20292
Trial 1	M1-2	C-P	M	0:01:03.840-0:01:04.106	BL	0.29777	8	1.11552
Trial 1	M1-2	C-P	M	0:01:04.106-0:01:04.372	BL	0.644264	8	2.41357
Trial 1	M1-2	C-P	M	0:01:04.372-0:01:04.638	BL	0.625514	8	2.34333
Trial 1	M1-2	C-P	M	0:01:04.638-0:01:04.904	BL	0.562892	8	2.10873
Trial 1	M1-2	C-P	M	0:01:04.904-0:01:05.170	BL	0.393437	8	1.47391
Trial 1	M1-2	C-P	M	0:01:05.170-0:01:05.436	BL	0.407715	8	1.52741
Trial 1	M1-2	C-P	M	0:01:05.436-0:01:05.702	BL	0.894819	8	3.3522
Trial 1	M1-2	C-P	M	0:01:05.702-0:01:05.968	BL	0.968623	8	3.6287
Trial 1	M1-2	C-P	M	0:01:05.968-0:01:06.234	BL	0.25168	8	0.942855
Trial 1	M1-2	C-P	M	0:01:06.234-0:01:06.500	BL	0.25168	8	0.942855
Trial 1	M1-2	C-P	M	0:01:06.500-0:01:06.766	BL	0.22022	7	0.942856
Trial 1	M1-2	C-P	M	0:01:06.766-0:01:07.032	BL	0.25168	8	0.942859
Trial 1	M1-2	C-P	M	0:01:07.032-0:01:07.298	BL	0.25168	8	0.942855
Trial 1	M1-2	C-P	M	0:01:07.298-0:01:07.564	BL	0.25168	8	0.942859
Trial 1	M1-2	C-P	M	0:01:07.564-0:01:07.830	BL	0.25168	8	0.942855
Trial 1	M1-2	C-P	M	0:01:07.830-0:01:08.096	BL	0.25168	8	0.942855
Trial 1	M1-2	C-P	M	0:01:08.096-0:01:08.362	BL	0.25168	8	0.942859
Trial 1	M1-2	C-P	M	0:01:08.362-0:01:08.628	BL	0.25168	8	0.942855
Trial 1	M1-2	C-P	M	0:01:08.628-0:01:08.894	BL	0.25168	8	0.942859
Trial 1	M1-2	C-P	M	0:01:08.894-0:01:09.160	BL	0.25168	8	0.942855
Trial 1	M1-2	C-P	M	0:01:09.160-0:01:09.426	BL	0.25168	8	0.942855
Trial 1	M1-2	C-P	M	0:01:09.426-0:01:09.692	BL	0.25168	8	0.942859
Trial 1	M1-2	C-P	M	0:01:09.692-0:01:09.958	BL	0.25168	8	0.942855
Trial 1	M1-2	C-P	M	0:01:09.958-0:01:10.224	BL	0.25168	8	0.942859
Trial 1	M1-2	C-P	M	0:01:10.224-0:01:10.490	BL	0.25168	8	0.942855
Trial 1	M1-2	C-P	M	0:01:10.490-0:01:10.756	BL	0.25168	8	0.942855
Trial 1	M1-2	C-P	M	0:01:10.756-0:01:11.022	BL	0.399326	8	1.49597
Trial 1	M1-2	C-P	M	0:01:11.022-0:01:11.288	BL	6.50469	8	24.3682
Trial 1	M1-2	C-P	M	0:01:11.288-0:01:11.554	BL	1.53946	8	5.76719
Trial 1	M1-2	C-P	M	0:01:11.554-0:01:11.820	BL	2.56867	8	9.62288
Trial 1	M1-2	C-P	M	0:01:11.820-0:01:12.086	BL	3.24859	8	12.17
Trial 1	M1-2	C-P	M	0:01:12.086-0:01:12.352	BL	1.71695	8	6.43214
Trial 1	M1-2	C-P	M	0:01:12.352-0:01:12.618	BL	1.2826	8	4.80492
Trial 1	M1-2	C-P	M	0:01:12.618-0:01:12.884	BL	0.871034	8	3.26311
Trial 1	M1-2	C-P	M	0:01:12.884-0:01:13.150	BL	0.67085	8	2.51317
Trial 1	M1-2	C-P	M	0:01:13.150-0:01:13.416	BL	2.28085	8	8.5446
Trial 1	M1-2	C-P	M	0:01:13.416-0:01:13.682	BL	1.36617	8	5.11803
Trial 1	M1-2	C-P	M	0:01:13.682-0:01:13.948	BL	3.46311	8	12.9736
Trial 1	M1-2	C-P	M	0:01:13.948-0:01:14.214	BL	4.8855	8	18.3023
Trial 1	M1-2	C-P	M	0:01:14.214-0:01:14.480	BL	3.38664	8	12.6872
Trial 1	M1-2	C-P	M	0:01:14.480-0:01:14.746	BL	1.6174	8	6.05917
Trial 1	M1-2	C-P	M	0:01:14.746-0:01:15.012	BL	0.78314	8	2.93384
Trial 1	M1-2	C-P	M	0:01:15.012-0:01:15.278	BL	2.05135	8	7.68485
Trial 1	M1-2	C-P	M	0:01:15.278-0:01:15.544	BL	0.349343	8	1.30872
Trial 1	M1-2	C-P	M	0:01:15.544-0:01:15.810	BL	0.652495	8	2.4444
Trial 1	M1-2	C-P	M	0:01:15.810-0:01:16.076	BL	0.125935	7	0.53918
Trial 1	M1-2	C-P	M	0:01:16.076-0:01:16.342	BL	0.220985	8	0.827862
Trial 1	M1-2	C-P	M	0:01:16.342-0:01:16.608	BL	0.165507	8	0.620025
Trial 1	M1-2	C-P	M	0:01:16.608-0:01:16.874	BL	0.170088	8	0.637194
Trial 1	M1-2	C-P	M	0:01:16.874-0:01:17.140	BL	0.348825	8	1.30678
Trial 1	M1-2	C-P	M	0:01:17.140-0:01:17.406	BL	0.580062	8	2.17307
Trial 1	M1-2	C-P	M	0:01:17.406-0:01:17.672	BL	0.543059	8	2.03443
Trial 1	M1-2	C-P	M	0:01:17.672-0:01:17.938	BL	0.498194	8	1.86636
Trial 1	M1-2	C-P	M	0:01:17.938-0:01:18.204	BL	0.844853	8	3.16503
Trial 1	M1-2	C-P	M	0:01:18.204-0:01:18.470	BL	0.791312	8	2.96447
Trial 1	M1-2	C-P	M	0:01:18.470-0:01:18.736	BL	1.08095	8	4.04949
Trial 1	M1-2	C-P	M	0:01:18.736-0:01:19.002	BL	1.22464	8	4.58782
Trial 1	M1-2	C-P	M	0:01:19.002-0:01:19.268	BL	0.331036	8	1.24014
Trial 1	M1-2	C-P	M	0:01:19.268-0:01:19.534	BL	0.218972	8	0.820321
Trial 1	M1-2	C-P	M	0:01:19.534-0:01:19.800	BL	0.23166	8	0.867861
Trial 1	M1-2	C-P	M	0:01:19.800-0:01:20.066	BL	0.294143	8	1.10194
Trial 1	M1-2	C-P	M	0:01:20.066-0:01:20.332	BL	0.223938	8	0.838931
Trial 1	M1-2	C-P	M	0:01:20.332-0:01:20.598	BL	0.236427	8	0.885717
Trial 1	M1-2	C-P	M	0:01:20.598-0:01:20.864	BL	0.389844	8	1.46045
Trial 1	M1-2	C-P	M	0:01:20.864-0:01:21.130	BL	0.200253	8	0.7502
Trial 1	M1-2	C-P	M	0:01:21.130-0:01:21.396	BL	0.319292	8	1.19614
Trial 1	M1-2	C-P	M	0:01:21.396-0:01:21.662	BL	0.761404	8	2.85244
Trial 1	M1-2	C-P	M	0:01:21.662-0:01:21.928	BL	1.27367	8	4.77148
Trial 1	M1-2	C-P	M	0:01:21.928-0:01:22.194	BL	0.876253	8	3.28266
Trial 1	M1-2	C-P	M	0:01:22.194-0:01:22.460	BL	1.47214	8	5.51498
Trial 1	M1-2	C-P	M	0:01:22.460-0:01:22.726	BL	0.446295	8	1.67192
Trial 1	M1-2	C-P	M	0:01:22.726-0:01:22.992	BL	0.512188	8	1.91879
Trial 1	M1-2	C-P	M	0:01:22.992-0:01:23.258	BL	0.512188	8	1.91878
Trial 1	M1-2	C-P	M	0:01:23.258-0:01:23.524	BL	0.512188	8	1.91878
Trial 1	M1-2	C-P	M	0:01:23.524-0:01:23.790	BL	0.512188	8	1.91879
Trial 1	M1-2	C-P	M	0:01:23.790-0:01:24.056	BL	0.512188	8	1.91878
Trial 1	M1-2	C-P	M	0:01:24.056-0:01:24.322	BL	0.512188	8	1.91879
Trial 1	M1-2	C-P	M	0:01:24.322-0:01:24.588	BL	0.512188	8	1.91878
Trial 1	M1-2	C-P	M	0:01:24.588-0:01:24.854	BL	0.512188	8	1.91878
Trial 1	M1-2	C-P	M	0:01:24.854-0:01:25.120	BL	1.85524	8	6.95019
Trial 1	M1-2	C-P	M	0:01:25.120-0:01:25.386	BL	1.71461	8	6.42335
Trial 1	M1-2	C-P	M	0:01:25.386-0:01:25.652	BL	0.609631	7	2.61009
Trial 1	M1-2	C-P	M	0:01:25.652-0:01:25.918	BL	1.84555	8	6.91392
Trial 1	M1-2	C-P	M	0:01:25.918-0:01:26.184	BL	4.92458	8	18.4486
Trial 1	M1-2	C-P	M	0:01:26.184-0:01:26.450	BL	1.18042	8	4.42216
Trial 1	M1-2	C-P	M	0:01:26.450-0:01:26.716	BL	0.994013	8	3.72385
Trial 1	M1-2	C-P	M	0:01:26.716-0:01:26.982	BL	0.817734	8	3.06343
Trial 1	M1-2	C-P	M	0:01:26.982-0:01:27.248	BL	0.407221	8	1.52557
Trial 1	M1-2	C-P	M	0:01:27.248-0:01:27.514	BL	1.85052	8	6.9325
Trial 1	M1-2	C-P	M	0:01:27.514-0:01:27.780	BL	2.06044	8	7.71891
Trial 1	M1-2	C-P	M	0:01:27.780-0:01:28.046	BL	0.97528	8	3.65366
Trial 1	M1-2	C-P	M	0:01:28.046-0:01:28.312	BL	1.01222	8	3.79203
Trial 1	M1-2	C-P	M	0:01:28.312-0:01:28.578	BL	2.3198	8	8.69056
Trial 1	M1-2	C-P	M	0:01:28.578-0:01:28.844	BL	0.558606	8	2.09269
Trial 1	M1-2	C-P	M	0:01:28.844-0:01:29.110	BL	1.41784	8	5.31157
Trial 1	M1-2	C-P	M	0:01:29.110-0:01:29.376	BL	1.59442	8	5.9731
Trial 1	M1-2	C-P	M	0:01:29.376-0:01:29.642	BL	0.294199	8	1.10214
Trial 1	M1-2	C-P	M	0:01:29.642-0:01:29.908	BL	1.83989	8	6.8927
Trial 1	M1-2	C-P	M	0:01:29.908-0:01:30.174	BL	1.61708	8	6.05794
Trial 1	M1-2	C-P	M	0:01:30.174-0:01:30.440	BL	0.45336	8	1.69841
Trial 1	M1-2	C-P	M	0:01:30.440-0:01:30.706	BL	0.22166	8	0.830388
Trial 1	M1-2	C-P	M	0:01:30.706-0:01:30.972	BL	0.357774	8	1.34031
Trial 1	M1-2	C-P	M	0:01:30.972-0:01:31.238	BL	0.868312	8	3.25292
Trial 1	M1-2	C-P	M	0:01:31.238-0:01:31.504	BL	0.5672	8	2.12486
Trial 1	M1-2	C-P	M	0:01:31.504-0:01:31.770	BL	0.167032	8	0.625743
Trial 1	M1-2	C-P	M	0:01:31.770-0:01:32.036	BL	0.429631	8	1.6095
Trial 1	M1-2	C-P	M	0:01:32.036-0:01:32.302	BL	0.518469	8	1.94231
Trial 1	M1-2	C-P	M	0:01:32.302-0:01:32.568	BL	0.146935	8	0.550453
Trial 1	M1-2	C-P	M	0:01:32.568-0:01:32.834	BL	0.206646	8	0.77415
Trial 1	M1-2	C-P	M	0:01:32.834-0:01:33.100	BL	0.239775	8	0.898257
Trial 1	M1-2	C-P	M	0:01:33.100-0:01:33.366	BL	0.25754	8	0.964813
Trial 1	M1-2	C-P	M	0:01:33.366-0:01:33.632	BL	0.470698	8	1.76335
Trial 1	M1-2	C-P	M	0:01:33.632-0:01:33.898	BL	0.211811	8	0.793498
Trial 1	M1-2	C-P	M	0:01:33.898-0:01:34.164	BL	0.784077	8	2.93734
Trial 1	M1-2	C-P	M	0:01:34.164-0:01:34.430	BL	1.60344	8	6.00685
Trial 1	M1-2	C-P	M	0:01:34.430-0:01:34.696	BL	0.379945	8	1.42338
Trial 1	M1-2	C-P	M	0:01:34.696-0:01:34.962	BL	0.0689595	8	0.258342
Trial 1	M1-2	C-P	M	0:01:34.962-0:01:35.228	BL	0.257622	7	1.10298
Trial 1	M1-2	C-P	M	0:01:35.228-0:01:35.494	BL	1.05572	8	3.95501
Trial 1	M1-2	C-P	M	0:01:35.494-0:01:35.760	BL	0.238773	8	0.894503
Trial 1	M1-2	C-P	M	0:01:35.760-0:01:36.026	BL	0.342419	8	1.28278
Trial 1	M1-2	C-P	M	0:01:36.026-0:01:36.292	BL	0.482069	8	1.80596
Trial 1	M1-2	C-P	M	0:01:36.292-0:01:36.558	BL	0.754795	8	2.82765
Trial 1	M1-2	C-P	M	0:01:36.558-0:01:36.824	BL	1.24249	8	4.65467
Trial 1	M1-2	C-P	M	0:01:36.824-0:01:37.090	BL	0.444978	8	1.667
Trial 1	M1-2	C-P	M	0:01:37.090-0:01:37.356	BL	0.12736	8	0.477126
Trial 1	M1-2	C-P	M	0:01:37.356-0:01:37.622	BL	0.757504	8	2.8378
Trial 1	M1-2	C-P	M	0:01:37.622-0:01:37.888	BL	0.837139	8	3.13614
Trial 1	M1-2	C-P	M	0:01:37.888-0:01:38.154	BL	0.333834	8	1.25063
Trial 1	M1-2	C-P	M	0:01:38.154-0:01:38.420	BL	0.750447	8	2.81135
Trial 1	M1-2	C-P	M	0:01:38.420-0:01:38.686	BL	0.759808	8	2.84646
Trial 1	M1-2	C-P	M	0:01:38.686-0:01:38.952	BL	0.487733	8	1.82717
Trial 1	M1-2	C-P	M	0:01:38.952-0:01:39.218	BL	0.338554	8	1.26831
Trial 1	M1-2	C-P	M	0:01:39.218-0:01:39.484	BL	0.624017	8	2.33773
Trial 1	M1-2	C-P	M	0:01:39.484-0:01:39.750	BL	0.603677	8	2.26151
Trial 1	M1-2	C-P	M	0:01:39.750-0:01:40.016	BL	0.627093	8	2.34925
Trial 1	M1-2	C-P	M	0:01:40.016-0:01:40.282	BL	0.545845	8	2.04487
Trial 1	M1-2	C-P	M	0:01:40.282-0:01:40.548	BL	0.724421	8	2.71387
Trial 1	M1-2	C-P	M	0:01:40.548-0:01:40.814	BL	0.584397	8	2.1893
Trial 1	M1-2	C-P	M	0:01:40.814-0:01:41.080	BL	0.312531	8	1.17082
Trial 1	M1-2	C-P	M	0:01:41.080-0:01:41.346	BL	0.107639	8	0.403246
Trial 1	M1-2	C-P	M	0:01:41.346-0:01:41.612	BL	0.19861	8	0.744045
Trial 1	M1-2	C-P	M	0:01:41.612-0:01:41.878	BL	0.350163	8	1.3118
Trial 1	M1-2	C-P	M	0:01:41.878-0:01:42.144	BL	0.616609	8	2.30998
Trial 1	M1-2	C-P	M	0:01:42.144-0:01:42.410	BL	1.07913	8	4.04268
Trial 1	M1-2	C-P	M	0:01:42.410-0:01:42.676	BL	1.0253	8	3.84103
Trial 1	M1-2	C-P	M	0:01:42.676-0:01:42.942	BL	0.474518	8	1.77767
Trial 1	M1-2	C-P	M	0:01:42.942-0:01:43.208	BL	1.81365	8	6.79437
Trial 1	M1-2	C-P	M	0:01:43.208-0:01:43.474	BL	2.66306	8	9.97652
Trial 1	M1-2	C-P	M	0:01:43.474-0:01:43.740	BL	1.8512	8	6.93503
Trial 1	M1-2	C-P	M	0:01:43.740-0:01:44.006	BL	0.927779	8	3.4757
Trial 1	M1-2	C-P	M	0:01:44.006-0:01:44.272	BL	1.12026	8	4.19678
Trial 1	M1-2	C-P	M	0:01:44.272-0:01:44.538	BL	2.59995	8	9.74006
Trial 1	M1-2	C-P	M	0:01:44.538-0:01:44.804	BL	1.596	7	6.83318
Trial 1	M1-2	C-P	M	0:01:44.804-0:01:45.070	BL	0.672127	8	2.51796
Trial 1	M1-2	C-P	M	0:01:45.070-0:01:45.336	BL	0.920822	8	3.44961
Trial 1	M1-2	C-P	M	0:01:45.336-0:01:45.602	BL	0.703471	8	2.63537
Trial 1	M1-2	C-P	M	0:01:45.602-0:01:45.868	BL	0.35266	8	1.32116
Trial 1	M1-2	C-P	M	0:01:45.868-0:01:46.134	BL	1.01854	8	3.81567
Trial 1	M1-2	C-P	M	0:01:46.134-0:01:46.400	BL	0.758728	8	2.84239
Trial 1	M1-2	C-P	M	0:01:46.400-0:01:46.666	BL	0.580396	8	2.17431
Trial 1	M1-2	C-P	M	0:01:46.666-0:01:46.932	BL	0.303531	8	1.1371
Trial 1	M1-2	C-P	M	0:01:46.932-0:01:47.198	BL	0.976375	8	3.65774
Trial 1	M1-2	C-P	M	0:01:47.198-0:01:47.464	BL	0.954651	8	3.57636
Trial 1	M1-2	C-P	M	0:01:47.464-0:01:47.730	BL	0.825014	8	3.09071
Trial 1	M1-2	C-P	M	0:01:47.730-0:01:47.996	BL	0.435966	8	1.63324
Trial 1	M1-2	C-P	M	0:01:47.996-0:01:48.262	BL	0.380423	8	1.42517
Trial 1	M1-2	C-P	M	0:01:48.262-0:01:48.528	BL	0.732008	8	2.74228
Trial 1	M1-2	C-P	M	0:01:48.528-0:01:48.794	BL	1.39581	8	5.22903
Trial 1	M1-2	C-P	M	0:01:48.794-0:01:49.060	BL	1.0063	8	3.76984
Trial 1	M1-2	C-P	M	0:01:49.060-0:01:49.326	BL	1.0139	8	3.79833
Trial 1	M1-2	C-P	M	0:01:49.326-0:01:49.592	BL	1.02196	8	3.82854
Trial 1	M1-2	C-P	M	0:01:49.592-0:01:49.858	BL	1.29855	8	4.86469
Trial 1	M1-2	C-P	M	0:01:49.858-0:01:50.124	BL	2.34338	8	8.77886
Trial 1	M1-2	C-P	M	0:01:50.124-0:01:50.390	BL	0.945808	8	3.54325
Trial 1	M1-2	C-P	M	0:01:50.390-0:01:50.656	BL	2.7568	8	10.3277
Trial 1	M1-2	C-P	M	0:01:50.656-0:01:50.922	BL	3.882	8	14.543
Trial 1	M1-2	C-P	M	0:01:50.922-0:01:51.188	BL	3.52465	8	13.2042
Trial 1	M1-2	C-P	M	0:01:51.188-0:01:51.454	BL	1.2823	8	4.80383
Trial 1	M1-2	C-P	M	0:01:51.454-0:01:51.720	BL	0.335958	8	1.25858
Trial 1	M1-2	C-P	M	0:01:51.720-0:01:51.986	BL	0.154489	8	0.578754
Trial 1	M1-2	C-P	M	0:01:51.986-0:01:52.252	BL	0.318468	8	1.19307
Trial 1	M1-2	C-P	M	0:01:52.252-0:01:52.518	BL	0.594955	8	2.22885
Trial 1	M1-2	C-P	M	0:01:52.518-0:01:52.784	BL	0.244011	8	0.914122
Trial 1	M1-2	C-P	M	0:01:52.784-0:01:53.050	BL	0.300804	8	1.12689
Trial 1	M1-2	C-P	M	0:01:53.050-0:01:53.316	BL	0.163514	8	0.612561
Trial 1	M1-2	C-P	M	0:01:53.316-0:01:53.582	BL	0.280968	8	1.05258
Trial 1	M1-2	C-P	M	0:01:53.582-0:01:53.848	BL	0.163646	8	0.613054
Trial 1	M1-2	C-P	M	0:01:53.848-0:01:54.114	BL	0.48133	7	2.06079
Trial 1	M1-2	C-P	M	0:01:54.114-0:01:54.380	BL	0.494244	8	1.85157
Trial 1	M1-2	C-P	M	0:01:54.380-0:01:54.646	BL	0.69732	8	2.61235
Trial 1	M1-2	C-P	M	0:01:54.646-0:01:54.912	BL	1.64628	8	6.16738
Trial 1	M1-2	C-P	M	0:01:54.912-0:01:55.178	BL	0.70066	8	2.62484
Trial 1	M1-2	C-P	M	0:01:55.178-0:01:55.444	BL	0.653457	8	2.44801
Trial 1	M1-2	C-P	M	0:01:55.444-0:01:55.710	BL	0.823703	8	3.08579
Trial 1	M1-2	C-P	M	0:01:55.710-0:01:55.976	BL	0.191911	8	0.718947
Trial 1	M1-2	C-P	M	0:01:55.976-0:01:56.242	BL	0.0687737	8	0.257644
Trial 1	M1-2	C-P	M	0:01:56.242-0:01:56.508	BL	0.420774	8	1.57634
Trial 1	M1-2	C-P	M	0:01:56.508-0:01:56.774	BL	0.257955	8	0.96636
Trial 1	M1-2	C-P	M	0:01:56.774-0:01:57.040	BL	0.275601	8	1.03248
Trial 1	M1-2	C-P	M	0:01:57.040-0:01:57.306	BL	0.538494	8	2.01733
Trial 1	M1-2	C-P	M	0:01:57.306-0:01:57.572	BL	0.595701	8	2.23163
Trial 1	M1-2	C-P	M	0:01:57.572-0:01:57.838	BL	0.232269	8	0.870143
Trial 1	M1-2	C-P	M	0:01:57.838-0:01:58.104	BL	0.0864412	8	0.32383
Trial 1	M1-2	C-P	M	0:01:58.104-0:01:58.370	BL	0.184719	8	0.692001
Trial 1	M1-2	C-P	M	0:01:58.370-0:01:58.636	BL	0.395574	8	1.48192
Trial 1	M1-2	C-P	M	0:01:58.636-0:01:58.902	BL	0.71553	8	2.68054
Trial 1	M1-2	C-P	M	0:01:58.902-0:01:59.168	BL	0.487724	8	1.82715
Trial 1	M1-2	C-P	M	0:01:59.168-0:01:59.434	BL	0.295927	8	1.10861
Trial 1	M1-2	C-P	M	0:01:59.434-0:01:59.700	BL	0.468535	8	1.75525
Trial 1	M1-2	C-P	M	0:01:59.700-0:01:59.966	BL	0.305444	8	1.14426
Trial 1	M1-2	C-P	M	0:01:59.966-0:02:00.232	BL	0.208095	8	0.779571
Trial 1	M1-2	C-P	M	0:02:00.232-0:02:00.498	BL	0.10718	8	0.401521
Trial 1	M1-2	C-P	M	0:02:00.498-0:02:00.764	BL	0.440637	8	1.65073
Trial 1	M1-2	C-P	M	0:02:00.764-0:02:01.030	BL	0.35195	8	1.31849
Trial 1	M1-2	C-P	M	0:02:01.030-0:02:01.296	BL	0.127778	8	0.478689
Trial 1	M1-2	C-P	M	0:02:01.296-0:02:01.562	BL	0.199094	8	0.745854
Trial 1	M1-2	C-P	M	0:02:01.562-0:02:01.828	BL	0.281418	8	1.05426
Trial 1	M1-2	C-P	M	0:02:01.828-0:02:02.094	BL	0.200938	8	0.752762
Trial 1	M1-2	C-P	M	0:02:02.094-0:02:02.360	BL	0.190122	8	0.712244
Trial 1	M1-2	C-P	M	0:02:02.360-0:02:02.626	BL	0.0850552	8	0.318637
Trial 1	M1-2	C-P	M	0:02:02.626-0:02:02.892	BL	0.0315276	8	0.118111
Trial 1	M1-2	C-P	M	0:02:02.892-0:02:03.158	BL	0.0671313	8	0.251489
Trial 1	M1-2	C-P	M	0:02:03.158-0:02:03.424	BL	0.0568381	8	0.212929
Trial 1	M1-2	C-P	M	0:02:03.424-0:02:03.690	BL	0.282945	7	1.2114
Trial 1	M1-2	C-P	M	0:02:03.690-0:02:03.956	BL	0.283126	8	1.06066
Trial 1	M1-2	C-P	M	0:02:03.956-0:02:04.222	BL	0.31656	8	1.18591
Trial 1	M1-2	C-P	M	0:02:04.222-0:02:04.488	BL	0.151117	8	0.566123
Trial 1	M1-2	C-P	M	0:02:04.488-0:02:04.754	BL	0.0883259	8	0.330889
Trial 1	M1-2	C-P	M	0:02:04.754-0:02:05.020	BL	0.0974268	8	0.364986
Trial 1	M1-2	C-P	M	0:02:05.020-0:02:05.286	BL	0.0866468	8	0.324605
Trial 1	M1-2	C-P	M	0:02:05.286-0:02:05.552	BL	0.268825	8	1.00708
Trial 1	M1-2	C-P	M	0:02:05.552-0:02:05.818	BL	0.255066	8	0.955543
Trial 1	M1-2	C-P	M	0:02:05.818-0:02:06.084	BL	0.261308	8	0.978928
Trial 1	M1-2	C-P	M	0:02:06.084-0:02:06.350	BL	0.216587	8	0.811386
Trial 1	M1-2	C-P	M	0:02:06.350-0:02:06.616	BL	0.407846	8	1.52789
Trial 1	M1-2	C-P	M	0:02:06.616-0:02:06.882	BL	0.226064	8	0.84689
Trial 1	M1-2	C-P	M	0:02:06.882-0:02:07.148	BL	0.0303762	8	0.113797
Trial 1	M1-2	C-P	M	0:02:07.148-0:02:07.414	BL	0.151768	8	0.56856
Trial 1	M1-2	C-P	M	0:02:07.414-0:02:07.680	BL	0.0694045	8	0.260005
Trial 1	M1-2	C-P	M	0:02:07.680-0:02:07.946	BL	0.115448	8	0.432501
Trial 1	M1-2	C-P	M	0:02:07.946-0:02:08.212	BL	0.0724864	8	0.271551
Trial 1	M1-2	C-P	M	0:02:08.212-0:02:08.478	BL	0.339168	8	1.2706
Trial 1	M1-2	C-P	M	0:02:08.478-0:02:08.744	BL	0.273605	8	1.025
Trial 1	M1-2	C-P	M	0:02:08.744-0:02:09.010	BL	0.164297	8	0.615492
Trial 1	M1-2	C-P	M	0:02:09.010-0:02:09.276	BL	0.13079	8	0.489973
Trial 1	M1-2	C-P	M	0:02:09.276-0:02:09.542	BL	0.0962551	8	0.360594
Trial 1	M1-2	C-P	M	0:02:09.542-0:02:09.808	BL	0.0576977	8	0.216149
Trial 1	M1-2	C-P	M	0:02:09.808-0:02:10.074	BL	0.0178222	8	0.0667668
Trial 1	M1-2	C-P	M	0:02:10.074-0:02:10.340	BL	0.120701	8	0.452172
Trial 1	M1-2	C-P	M	0:02:10.340-0:02:10.606	BL	0.531347	8	1.99056
Trial 1	M1-2	C-P	M	0:02:10.606-0:02:10.872	BL	0.330627	8	1.23861
Trial 1	M1-2	C-P	M	0:02:10.872-0:02:11.138	BL	0.257042	8	0.962941
Trial 1	M1-2	C-P	M	0:02:11.138-0:02:11.404	BL	0.160492	8	0.601246
Trial 1	M1-2	C-P	M	0:02:11.404-0:02:11.670	BL	0.0791518	8	0.296523
Trial 1	M1-2	C-P	M	0:02:11.670-0:02:11.936	BL	0.0227206	8	0.0851178
Trial 1	M1-2	C-P	M	0:02:11.936-0:02:12.202	BL	0.0930651	8	0.348642
Trial 1	M1-2	C-P	M	0:02:12.202-0:02:12.468	BL	0.0576615	8	0.216015
Trial 1	M1-2	C-P	M	0:02:12.468-0:02:12.734	BL	0.166998	8	0.62562
Trial 1	M1-2	C-P	M	0:02:12.734-0:02:13.000	BL	0.274302	8	1.0276
Trial 1	M1-2	C-P	M	0:02:13.000-0:02:13.266	BL	0.186447	7	0.798255
Trial 1	M1-2	C-P	M	0:02:13.266-0:02:13.532	BL	0.382565	8	1.43319
Trial 1	M1-2	C-P	M	0:02:13.532-0:02:13.798	BL	0.481652	8	1.80438
Trial 1	M1-2	C-P	M	0:02:13.798-0:02:14.064	BL	0.418879	8	1.56923
Trial 1	M1-2	C-P	M	0:02:14.064-0:02:14.330	BL	0.288777	8	1.08183
Trial 1	M1-2	C-P	M	0:02:14.330-0:02:14.596	BL	0.215254	8	0.806394
Trial 1	M1-2	C-P	M	0:02:14.596-0:02:14.862	BL	0.0934941	8	0.350255
Trial 1	M1-2	C-P	M	0:02:14.862-0:02:15.128	BL	0.224851	8	0.842346
Trial 1	M1-2	C-P	M	0:02:15.128-0:02:15.394	BL	0.330836	8	1.2394
Trial 1	M1-2	C-P	M	0:02:15.394-0:02:15.660	BL	0.54501	8	2.04174
Trial 1	M1-2	C-P	M	0:02:15.660-0:02:15.926	BL	0.247763	8	0.928181
Trial 1	M1-2	C-P	M	0:02:15.926-0:02:16.192	BL	0.256018	8	0.959108
Trial 1	M1-2	C-P	M	0:02:16.192-0:02:16.458	BL	0.13784	8	0.516383
Trial 1	M1-2	C-P	M	0:02:16.458-0:02:16.724	BL	0.0644292	8	0.241369
Trial 1	M1-2	C-P	M	0:02:16.724-0:02:16.990	BL	0.0892184	8	0.334237
Trial 1	M1-2	C-P	M	0:02:16.990-0:02:17.256	BL	0.059489	8	0.222861
Trial 1	M1-2	C-P	M	0:02:17.256-0:02:17.522	BL	0.393376	8	1.47368
Trial 1	M1-2	C-P	M	0:02:17.522-0:02:17.788	BL	0.240321	8	0.900299
Trial 1	M1-2	C-P	M	0:02:17.788-0:02:18.054	BL	0.219566	8	0.822548
Trial 1	M1-2	C-P	M	0:02:18.054-0:02:18.320	BL	0.171246	8	0.64153
Trial 1	M1-2	C-P	M	0:02:18.320-0:02:18.586	BL	0.16137	8	0.604531
Trial 1	M1-2	C-P	M	0:02:18.586-0:02:18.852	BL	0.221058	8	0.828139
Trial 1	M1-2	C-P	M	0:02:18.852-0:02:19.118	BL	0.482118	8	1.80613
Trial 1	M1-2	C-P	M	0:02:19.118-0:02:19.384	BL	0.120492	8	0.451393
Trial 1	M1-2	C-P	M	0:02:19.384-0:02:19.650	BL	0.0876432	8	0.328332
Trial 1	M1-2	C-P	M	0:02:19.650-0:02:19.916	BL	0.0476768	8	0.178609
Trial 1	M1-2	C-P	M	0:02:19.916-0:02:20.182	BL	0.0468879	8	0.175656
Trial 1	M1-2	C-P	M	0:02:20.182-0:02:20.448	BL	0.0545458	8	0.204344
Trial 1	M1-2	C-P	M	0:02:20.448-0:02:20.714	BL	0.0995964	8	0.373114
Trial 1	M1-2	C-P	M	0:02:20.714-0:02:20.980	BL	0.0264083	8	0.0989314
Trial 1	M1-2	C-P	M	0:02:20.980-0:02:21.246	BL	0.108495	8	0.406446
Trial 1	M1-2	C-P	M	0:02:21.246-0:02:21.512	BL	0.0403371	8	0.151113
Trial 1	M1-2	C-P	M	0:02:21.512-0:02:21.778	BL	0.251201	8	0.941061
Trial 1	M1-2	C-P	M	0:02:21.778-0:02:22.044	BL	0.223196	8	0.83615
Trial 1	M1-2	C-P	M	0:02:22.044-0:02:22.310	BL	0.151786	8	0.568626
Trial 1	M1-2	C-P	M	0:02:22.310-0:02:22.576	BL	0.0707866	8	0.265186
Trial 1	M1-2	C-P	M	0:02:22.576-0:02:22.842	BL	0.0957304	7	0.409863
Trial 1	M1-2	C-P	M	0:02:22.842-0:02:23.108	BL	0.15766	8	0.590634
Trial 1	M1-2	C-P	M	0:02:23.108-0:02:23.374	BL	0.418195	8	1.56666
Trial 1	M1-2	C-P	M	0:02:23.374-0:02:23.640	BL	0.372575	8	1.39576
Trial 1	M1-2	C-P	M	0:02:23.640-0:02:23.906	BL	0.657288	8	2.46237
Trial 1	M1-2	C-P	M	0:02:23.906-0:02:24.172	BL	0.738168	8	2.76535
Trial 1	M1-2	C-P	M	0:02:24.172-0:02:24.438	BL	0.407478	8	1.52652
Trial 1	M1-2	C-P	M	0:02:24.438-0:02:24.704	BL	0.357381	8	1.33883
Trial 1	M1-2	C-P	M	0:02:24.704-0:02:24.970	BL	0.485377	8	1.81835
Trial 1	M1-2	C-P	M	0:02:24.970-0:02:25.236	BL	0.336105	8	1.25913
Trial 1	M1-2	C-P	M	0:02:25.236-0:02:25.502	BL	0.601815	8	2.25454
Trial 1	M1-2	C-P	M	0:02:25.502-0:02:25.768	BL	0.296797	8	1.11188
Trial 1	M1-2	C-P	M	0:02:25.768-0:02:26.034	BL	0.333697	8	1.25011
Trial 1	M1-2	C-P	M	0:02:26.034-0:02:26.300	BL	0.209675	8	0.785493
Trial 1	M1-2	C-P	M	0:02:26.300-0:02:26.566	BL	0.521687	8	1.95437
Trial 1	M1-2	C-P	M	0:02:26.566-0:02:26.832	BL	0.34234	8	1.28249
Trial 1	M1-2	C-P	M	0:02:26.832-0:02:27.098	BL	0.333735	8	1.25026
Trial 1	M1-2	C-P	M	0:02:27.098-0:02:27.364	BL	0.257797	8	0.965766
Trial 1	M1-2	C-P	M	0:02:27.364-0:02:27.630	BL	0.127351	8	0.477091
Trial 1	M1-2	C-P	M	0:02:27.630-0:02:27.896	BL	0.114258	8	0.428039
Trial 1	M1-2	C-P	M	0:02:27.896-0:02:28.162	BL	0.0703281	8	0.263467
Trial 1	M1-2	C-P	M	0:02:28.162-0:02:28.428	BL	0.209195	8	0.783702
Trial 1	M1-2	C-P	M	0:02:28.428-0:02:28.694	BL	0.259664	8	0.972762
Trial 1	M1-2	C-P	M	0:02:28.694-0:02:28.960	BL	0.267058	8	1.00046
Trial 1	M1-2	C-P	M	0:02:28.960-0:02:29.226	BL	0.137226	8	0.514082
Trial 1	M1-2	C-P	M	0:02:29.226-0:02:29.492	BL	0.0511221	8	0.191516
Trial 1	M1-2	C-P	M	0:02:29.492-0:02:29.758	BL	0.044284	8	0.165898
Trial 1	M1-2	C-P	M	0:02:29.758-0:02:30.024	BL	0.342602	8	1.28347
Trial 1	M1-2	C-P	M	0:02:30.024-0:02:30.290	BL	0.208343	8	0.780507
Trial 1	M1-2	C-P	M	0:02:30.290-0:02:30.556	BL	0.175496	8	0.657453
Trial 1	M1-2	C-P	M	0:02:30.556-0:02:30.822	BL	0.194303	8	0.727905
Trial 1	M1-2	C-P	M	0:02:30.822-0:02:31.088	BL	0.103075	8	0.386145
Trial 1	M1-2	C-P	M	0:02:31.088-0:02:31.354	BL	0.352402	8	1.32019
Trial 1	M1-2	C-P	M	0:02:31.354-0:02:31.620	BL	0.334546	8	1.25329
Trial 1	M1-2	C-P	M	0:02:31.620-0:02:31.886	BL	0.155698	8	0.583283
Trial 1	M1-2	C-P	M	0:02:31.886-0:02:32.152	BL	0.550981	7	2.35899
Trial 1	M1-2	C-P	M	0:02:32.152-0:02:32.418	BL	0.397518	8	1.48921
Trial 1	M1-2	C-P	M	0:02:32.418-0:02:32.684	BL	0.359368	8	1.34628
Trial 1	M1-2	C-P	M	0:02:32.684-0:02:32.950	BL	0.243124	8	0.9108
Trial 1	M1-2	C-P	M	0:02:32.950-0:02:33.216	BL	0.116226	8	0.435413
Trial 1	M1-2	C-P	M	0:02:33.216-0:02:33.482	BL	0.029717	8	0.111326
Trial 1	M1-2	C-P	M	0:02:33.482-0:02:33.748	BL	0.0396989	8	0.148723
Trial 1	M1-2	C-P	M	0:02:33.748-0:02:34.014	BL	0.195408	8	0.732045
Trial 1	M1-2	C-P	M	0:02:34.014-0:02:34.280	BL	0.206454	8	0.773429
Trial 1	M1-2	C-P	M	0:02:34.280-0:02:34.546	BL	0.197112	8	0.738436
Trial 1	M1-2	C-P	M	0:02:34.546-0:02:34.812	BL	0.303186	8	1.13581
Trial 1	M1-2	C-P	M	0:02:34.812-0:02:35.078	BL	0.46881	8	1.75629
Trial 1	M1-2	C-P	M	0:02:35.078-0:02:35.344	BL	0.088389	8	0.331127
Trial 1	M1-2	C-P	M	0:02:35.344-0:02:35.610	BL	0.0493409	8	0.184842
Trial 1	M1-2	C-P	M	0:02:35.610-0:02:35.876	BL	0.0416258	8	0.155941
Trial 1	M1-2	C-P	M	0:02:35.876-0:02:36.142	BL	0.15681	8	0.58745
Trial 1	M1-2	C-P	M	0:02:36.142-0:02:36.408	BL	0.183779	8	0.688482
Trial 1	M1-2	C-P	M	0:02:36.408-0:02:36.674	BL	0.0670661	8	0.251244
Trial 1	M1-2	C-P	M	0:02:36.674-0:02:36.940	BL	0.0733551	8	0.274805
Trial 1	M1-2	C-P	M	0:02:36.940-0:02:37.206	BL	0.107822	8	0.403932
Trial 1	M1-2	C-P	M	0:02:37.206-0:02:37.472	BL	0.0505324	8	0.189306
Trial 1	M1-2	C-P	M	0:02:37.472-0:02:37.738	BL	0.0662712	8	0.248267
Trial 1	M1-2	C-P	M	0:02:37.738-0:02:38.004	BL	0.0738402	8	0.276624
Trial 1	M1-2	C-P	M	0:02:38.004-0:02:38.270	BL	0.0358849	8	0.134433
Trial 1	M1-2	C-P	M	0:02:38.270-0:02:38.536	BL	0.0363173	8	0.136056
Trial 1	M1-2	C-P	M	0:02:38.536-0:02:38.802	BL	0.237302	8	0.888994
Trial 1	M1-2	C-P	M	0:02:38.802-0:02:39.068	BL	0.398378	8	1.49242
Trial 1	M1-2	C-P	M	0:02:39.068-0:02:39.334	BL	0.272199	8	1.01972
Trial 1	M1-2	C-P	M	0:02:39.334-0:02:39.600	BL	0.202585	8	0.75893
Trial 1	M1-2	C-P	M	0:02:39.600-0:02:39.866	BL	0.141715	8	0.530902
Trial 1	M1-2	C-P	M	0:02:39.866-0:02:40.132	BL	0.134101	8	0.502378
Trial 1	M1-2	C-P	M	0:02:40.132-0:02:40.398	BL	0.0892799	8	0.334464
Trial 1	M1-2	C-P	M	0:02:40.398-0:02:40.664	BL	0.099726	8	0.373596
Trial 1	M1-2	C-P	M	0:02:40.664-0:02:40.930	BL	0.0678445	8	0.254162
Trial 1	M1-2	C-P	M	0:02:40.930-0:02:41.196	BL	0.101761	8	0.381225
Trial 1	M1-2	C-P	M	0:02:41.196-0:02:41.462	BL	0.0470016	8	0.176081
Trial 1	M1-2	C-P	M	0:02:41.462-0:02:41.728	BL	0.219879	7	0.941393
Trial 1	M1-2	C-P	M	0:02:41.728-0:02:41.994	BL	0.362079	8	1.35644
Trial 1	M1-2	C-P	M	0:02:41.994-0:02:42.260	BL	0.193054	8	0.723226
Trial 1	M1-2	C-P	M	0:02:42.260-0:02:42.526	BL	0.15776	8	0.591005
Trial 1	M1-2	C-P	M	0:02:42.526-0:02:42.792	BL	0.174946	8	0.655391
Trial 1	M1-2	C-P	M	0:02:42.792-0:02:43.058	BL	0.142369	8	0.533349
Trial 1	M1-2	C-P	M	0:02:43.058-0:02:43.324	BL	0.116471	8	0.436327
Trial 1	M1-2	C-P	M	0:02:43.324-0:02:43.590	BL	0.0822147	8	0.307995
Trial 1	M1-2	C-P	M	0:02:43.590-0:02:43.856	BL	0.111283	8	0.416893
Trial 1	M1-2	C-P	M	0:02:43.856-0:02:44.122	BL	0.0758444	8	0.284136
Trial 1	M1-2	C-P	M	0:02:44.122-0:02:44.388	BL	0.0729606	8	0.273327
Trial 1	M1-2	C-P	M	0:02:44.388-0:02:44.654	BL	0.0505248	8	0.189279
Trial 1	M1-2	C-P	M	0:02:44.654-0:02:44.920	BL	0.0657809	8	0.246431
Trial 1	M1-2	C-P	M	0:02:44.920-0:02:45.186	BL	0.0812082	8	0.304225
Trial 1	M1-2	C-P	M	0:02:45.186-0:02:45.452	BL	0.0438967	8	0.16445
Trial 1	M1-2	C-P	M	0:02:45.452-0:02:45.718	BL	0.0395129	8	0.148025
Trial 1	M1-2	C-P	M	0:02:45.718-0:02:45.984	BL	0.318313	8	1.19248
Trial 1	M1-2	C-P	M	0:02:45.984-0:02:46.250	BL	0.201193	8	0.753717
Trial 1	M1-2	C-P	M	0:02:46.250-0:02:46.516	BL	0.437016	8	1.63717
Trial 1	M1-2	C-P	M	0:02:46.516-0:02:46.782	BL	0.234492	8	0.878467
Trial 1	M1-2	C-P	M	0:02:46.782-0:02:47.048	BL	0.249078	8	0.933106
Trial 1	M1-2	C-P	M	0:02:47.048-0:02:47.314	BL	0.170684	8	0.639426
Trial 1	M1-2	C-P	M	0:02:47.314-0:02:47.580	BL	0.148882	8	0.557744
Trial 1	M1-2	C-P	M	0:02:47.580-0:02:47.846	BL	0.0567281	8	0.212518
Trial 1	M1-2	C-P	M	0:02:47.846-0:02:48.112	BL	0.145561	8	0.545306
Trial 1	M1-2	C-P	M	0:02:48.112-0:02:48.378	BL	0.18629	8	0.697884
Trial 1	M1-2	C-P	M	0:02:48.378-0:02:48.644	BL	0.0979193	8	0.366831
Trial 1	M1-2	C-P	M	0:02:48.644-0:02:48.910	BL	0.0607736	8	0.227671
Trial 1	M1-2	C-P	M	0:02:48.910-0:02:49.176	BL	0.0620745	8	0.232547
Trial 1	M1-2	C-P	M	0:02:49.176-0:02:49.442	BL	0.0464886	8	0.174157
Trial 1	M1-2	C-P	M	0:02:49.442-0:02:49.708	BL	0.0688782	8	0.258035
Trial 1	M1-2	C-P	M	0:02:49.708-0:02:49.974	BL	0.0364492	8	0.136549
Trial 1	M1-2	C-P	M	0:02:49.974-0:02:50.240	BL	0.112735	8	0.422334
Trial 1	M1-2	C-P	M	0:02:50.240-0:02:50.506	BL	0.206677	8	0.774267
Trial 1	M1-2	C-P	M	0:02:50.506-0:02:50.772	BL	0.150267	8	0.562939
Trial 1	M1-2	C-P	M	0:02:50.772-0:02:51.038	BL	0.0772853	8	0.28953
Trial 1	M1-2	C-P	M	0:02:51.038-0:02:51.304	BL	0.0774397	7	0.331551
Trial 1	M1-2	C-P	M	0:02:51.304-0:02:51.570	BL	0.0389184	8	0.145799
Trial 1	M1-2	C-P	M	0:02:51.570-0:02:51.836	BL	0.0690434	8	0.258655
Trial 1	M1-2	C-P	M	0:02:51.836-0:02:52.102	BL	0.0253849	8	0.0950976
Trial 1	M1-2	C-P	M	0:02:52.102-0:02:52.368	BL	0.10801	8	0.404631
Trial 1	M1-2	C-P	M	0:02:52.368-0:02:52.634	BL	0.0454485	8	0.170261
Trial 1	M1-2	C-P	M	0:02:52.634-0:02:52.900	BL	0.127549	8	0.477829
Trial 1	M1-2	C-P	M	0:02:52.900-0:02:53.166	BL	0.147758	8	0.553538
Trial 1	M1-2	C-P	M	0:02:53.166-0:02:53.432	BL	0.530645	8	1.98793
Trial 1	M1-2	C-P	M	0:02:53.432-0:02:53.698	BL	0.280643	8	1.05136
Trial 1	M1-2	C-P	M	0:02:53.698-0:02:53.964	BL	0.245544	8	0.919864
Trial 1	M1-2	C-P	M	0:02:53.964-0:02:54.230	BL	0.298279	8	1.11744
Trial 1	M1-2	C-P	M	0:02:54.230-0:02:54.496	BL	0.16433	8	0.615623
Trial 1	M1-2	C-P	M	0:02:54.496-0:02:54.762	BL	0.118463	8	0.443793
Trial 1	M1-2	C-P	M	0:02:54.762-0:02:55.028	BL	0.141361	8	0.529576
Trial 1	M1-2	C-P	M	0:02:55.028-0:02:55.294	BL	0.0883301	8	0.330908
Trial 1	M1-2	C-P	M	0:02:55.294-0:02:55.560	BL	0.0487276	8	0.182546
Trial 1	M1-2	C-P	M	0:02:55.560-0:02:55.826	BL	0.0324341	8	0.121506
Trial 1	M1-2	C-P	M	0:02:55.826-0:02:56.092	BL	0.0754016	8	0.282477
Trial 1	M1-2	C-P	M	0:02:56.092-0:02:56.358	BL	0.0705864	8	0.264434
Trial 1	M1-2	C-P	M	0:02:56.358-0:02:56.624	BL	0.0780808	8	0.292509
Trial 1	M1-2	C-P	M	0:02:56.624-0:02:56.890	BL	0.200576	8	0.751404
Trial 1	M1-2	C-P	M	0:02:56.890-0:02:57.156	BL	0.193038	8	0.723168
Trial 1	M1-2	C-P	M	0:02:57.156-0:02:57.422	BL	0.112298	8	0.420697
Trial 1	M1-2	C-P	M	0:02:57.422-0:02:57.688	BL	0.0939703	8	0.352036
Trial 1	M1-2	C-P	M	0:02:57.688-0:02:57.954	BL	0.141145	8	0.528765
Trial 1	M1-2	C-P	M	0:02:57.954-0:02:58.220	BL	0.0938416	8	0.351556
Trial 1	M1-2	C-P	M	0:02:58.220-0:02:58.486	BL	0.0781976	8	0.292945
Trial 1	M1-2	C-P	M	0:02:58.486-0:02:58.752	BL	0.154558	8	0.579014
Trial 1	M1-2	C-P	M	0:02:58.752-0:02:59.018	BL	0.287024	8	1.07527
Trial 1	M1-2	C-P	M	0:02:59.018-0:02:59.284	BL	0.144426	8	0.541054
Trial 1	M1-2	C-P	M	0:02:59.284-0:02:59.550	BL	0.322374	8	1.20769
Trial 1	M1-2	C-P	M	0:02:59.550-0:02:59.816	BL	0.0778219	8	0.291538
Trial 1	M1-2	C-P	M	0:02:59.816-0:03:00.082	BL	0.0616954	8	0.231126
Trial 1	M1-2	C-P	M	0:03:00.082-0:03:00.348	CS1a	0.220993	8	0.827893
Trial 1	M1-2	C-P	M	0:03:00.348-0:03:00.614	CS1a	0.350395	8	1.31267
Trial 1	M1-2	C-P	M	0:03:00.614-0:03:00.880	CS1a	0.105205	7	0.450428
Trial 1	M1-2	C-P	M	0:03:00.880-0:03:01.146	CS1a	0.138889	8	0.520314
Trial 1	M1-2	C-P	M	0:03:01.146-0:03:01.412	CS1a	0.122858	8	0.460257
Trial 1	M1-2	C-P	M	0:03:01.412-0:03:01.678	CS1a	0.0754669	8	0.282718
Trial 1	M1-2	C-P	M	0:03:01.678-0:03:01.944	CS1a	0.068467	8	0.256494
Trial 1	M1-2	C-P	M	0:03:01.944-0:03:02.210	CS1a	0.0851669	8	0.319056
Trial 1	M1-2	C-P	M	0:03:02.210-0:03:02.476	CS1a	0.0396333	8	0.148477
Trial 1	M1-2	C-P	M	0:03:02.476-0:03:02.742	CS1a	0.0817119	8	0.306112
Trial 1	M1-2	C-P	M	0:03:02.742-0:03:03.008	CS1a	0.0317411	8	0.118911
Trial 1	M1-2	C-P	M	0:03:03.008-0:03:03.274	CS1a	0.0793303	8	0.29719
Trial 1	M1-2	C-P	M	0:03:03.274-0:03:03.540	CS1a	0.0624544	8	0.23397
Trial 1	M1-2	C-P	M	0:03:03.540-0:03:03.806	CS1a	0.0531439	8	0.199091
Trial 1	M1-2	C-P	M	0:03:03.806-0:03:04.072	CS1a	0.0780225	8	0.29229
Trial 1	M1-2	C-P	M	0:03:04.072-0:03:04.338	CS1a	0.0891028	8	0.333802
Trial 1	M1-2	C-P	M	0:03:04.338-0:03:04.604	CS1a	0.0750313	8	0.281087
Trial 1	M1-2	C-P	M	0:03:04.604-0:03:04.870	CS1a	0.0410571	8	0.15381
Trial 1	M1-2	C-P	M	0:03:04.870-0:03:05.136	CS1a	0.0517614	8	0.193913
Trial 1	M1-2	C-P	M	0:03:05.136-0:03:05.402	CS1a	0.0310504	8	0.116323
Trial 1	M1-2	C-P	M	0:03:05.402-0:03:05.668	CS1a	0.168995	8	0.633104
Trial 1	M1-2	C-P	M	0:03:05.668-0:03:05.934	CS1a	0.421932	8	1.58066
Trial 1	M1-2	C-P	M	0:03:05.934-0:03:06.200	CS1a	0.19576	8	0.733364
Trial 1	M1-2	C-P	M	0:03:06.200-0:03:06.466	CS1a	0.343258	8	1.28593
Trial 1	M1-2	C-P	M	0:03:06.466-0:03:06.732	CS1a	0.456051	8	1.70848
Trial 1	M1-2	C-P	M	0:03:06.732-0:03:06.998	CS1a	0.270577	8	1.01365
Trial 1	M1-2	C-P	M	0:03:06.998-0:03:07.264	CS1a	0.24686	8	0.924795
Trial 1	M1-2	C-P	M	0:03:07.264-0:03:07.530	CS1a	0.178574	8	0.668982
Trial 1	M1-2	C-P	M	0:03:07.530-0:03:07.796	CS1a	0.187812	8	0.703591
Trial 1	M1-2	C-P	M	0:03:07.796-0:03:08.062	CS1a	0.103127	8	0.386338
Trial 1	M1-2	C-P	M	0:03:08.062-0:03:08.328	CS1a	0.0662654	8	0.248246
Trial 1	M1-2	C-P	M	0:03:08.328-0:03:08.594	CS1a	0.109427	8	0.409938
Trial 1	M1-2	C-P	M	0:03:08.594-0:03:08.860	CS1a	0.096494	8	0.361489
Trial 1	M1-2	C-P	M	0:03:08.860-0:03:09.126	CS1a	0.169004	8	0.633137
Trial 1	M1-2	C-P	M	0:03:09.126-0:03:09.392	CS1a	0.113691	8	0.425918
Trial 1	M1-2	C-P	M	0:03:09.392-0:03:09.658	CS1a	0.0379332	8	0.142108
Trial 1	M1-2	C-P	M	0:03:09.658-0:03:09.924	CS1a	0.0614559	8	0.230227
Trial 1	M1-2	C-P	M	0:03:09.924-0:03:10.190	CS1b	0.0304634	7	0.130427
Trial 1	M1-2	C-P	M	0:03:10.190-0:03:10.456	CS1b	0.0727731	8	0.272626
Trial 1	M1-2	C-P	M	0:03:10.456-0:03:10.722	CS1b	0.103377	8	0.387274
Trial 1	M1-2	C-P	M	0:03:10.722-0:03:10.988	CS1b	0.115226	8	0.431665
Trial 1	M1-2	C-P	M	0:03:10.988-0:03:11.254	CS1b	0.0565507	8	0.211853
Trial 1	M1-2	C-P	M	0:03:11.254-0:03:11.520	CS1b	0.0290965	8	0.109003
Trial 1	M1-2	C-P	M	0:03:11.520-0:03:11.786	CS1b	0.0568898	8	0.213123
Trial 1	M1-2	C-P	M	0:03:11.786-0:03:12.052	CS1b	0.0307206	8	0.115087
Trial 1	M1-2	C-P	M	0:03:12.052-0:03:12.318	CS1b	0.126779	8	0.474945
Trial 1	M1-2	C-P	M	0:03:12.318-0:03:12.584	CS1b	0.0865279	8	0.324154
Trial 1	M1-2	C-P	M	0:03:12.584-0:03:12.850	CS1b	0.0636597	8	0.238485
Trial 1	M1-2	C-P	M	0:03:12.850-0:03:13.116	CS1b	0.12626	8	0.473004
Trial 1	M1-2	C-P	M	0:03:13.116-0:03:13.382	CS1b	0.0434488	8	0.16277
Trial 1	M1-2	C-P	M	0:03:13.382-0:03:13.648	CS1b	0.066077	8	0.24754
Trial 1	M1-2	C-P	M	0:03:13.648-0:03:13.914	CS1b	0.0567282	8	0.212519
Trial 1	M1-2	C-P	M	0:03:13.914-0:03:14.180	CS1b	0.0519371	8	0.19457
Trial 1	M1-2	C-P	M	0:03:14.180-0:03:14.446	CS1b	0.102885	8	0.385434
Trial 1	M1-2	C-P	M	0:03:14.446-0:03:14.712	CS1b	0.0591646	8	0.221644
Trial 1	M1-2	C-P	M	0:03:14.712-0:03:14.978	CS1b	0.228527	8	0.856113
Trial 1	M1-2	C-P	M	0:03:14.978-0:03:15.244	CS1b	0.247132	8	0.925818
Trial 1	M1-2	C-P	M	0:03:15.244-0:03:15.510	CS1b	0.154006	8	0.576942
Trial 1	M1-2	C-P	M	0:03:15.510-0:03:15.776	CS1b	0.101905	8	0.38176
Trial 1	M1-2	C-P	M	0:03:15.776-0:03:16.042	CS1b	0.116548	8	0.436616
Trial 1	M1-2	C-P	M	0:03:16.042-0:03:16.308	CS1b	0.118486	8	0.443879
Trial 1	M1-2	C-P	M	0:03:16.308-0:03:16.574	CS1b	0.091984	8	0.344594
Trial 1	M1-2	C-P	M	0:03:16.574-0:03:16.840	CS1b	0.164937	8	0.617893
Trial 1	M1-2	C-P	M	0:03:16.840-0:03:17.106	CS1b	0.0599569	8	0.224615
Trial 1	M1-2	C-P	M	0:03:17.106-0:03:17.372	CS1b	0.0693407	8	0.259765
Trial 1	M1-2	C-P	M	0:03:17.372-0:03:17.638	CS1b	0.0438516	8	0.164278
Trial 1	M1-2	C-P	M	0:03:17.638-0:03:17.904	CS1b	0.0961674	8	0.36027
Trial 1	M1-2	C-P	M	0:03:17.904-0:03:18.170	CS1b	0.032718	8	0.122569
Trial 1	M1-2	C-P	M	0:03:18.170-0:03:18.436	CS1b	0.101136	8	0.378883
Trial 1	M1-2	C-P	M	0:03:18.436-0:03:18.702	CS1b	0.0456927	8	0.171175
Trial 1	M1-2	C-P	M	0:03:18.702-0:03:18.968	CS1b	0.0708353	8	0.265366
Trial 1	M1-2	C-P	M	0:03:18.968-0:03:19.234	CS1b	0.0348451	8	0.13054
Trial 1	M1-2	C-P	M	0:03:19.234-0:03:19.500	CS1b	0.25377	8	0.950682
Trial 1	M1-2	C-P	M	0:03:19.500-0:03:19.766	CS1b	0.35684	7	1.52778
Trial 1	M1-2	C-P	M	0:03:19.766-0:03:20.032	CS1b	0.134161	8	0.502602
Trial 1	M1-2	C-P	M	0:03:20.032-0:03:20.298	IT1	0.305435	8	1.14423
Trial 1	M1-2	C-P	M	0:03:20.298-0:03:20.564	IT1	0.266431	8	0.998119
Trial 1	M1-2	C-P	M	0:03:20.564-0:03:20.830	IT1	0.163323	8	0.611851
Trial 1	M1-2	C-P	M	0:03:20.830-0:03:21.096	IT1	0.070062	8	0.262471
Trial 1	M1-2	C-P	M	0:03:21.096-0:03:21.362	IT1	0.0540689	8	0.202556
Trial 1	M1-2	C-P	M	0:03:21.362-0:03:21.628	IT1	0.0550454	8	0.206213
Trial 1	M1-2	C-P	M	0:03:21.628-0:03:21.894	IT1	0.238902	8	0.894978
Trial 1	M1-2	C-P	M	0:03:21.894-0:03:22.160	IT1	0.204694	8	0.766837
Trial 1	M1-2	C-P	M	0:03:22.160-0:03:22.426	IT1	0.141476	8	0.530003
Trial 1	M1-2	C-P	M	0:03:22.426-0:03:22.692	IT1	0.0333307	8	0.124864
Trial 1	M1-2	C-P	M	0:03:22.692-0:03:22.958	IT1	0.0641005	8	0.240138
Trial 1	M1-2	C-P	M	0:03:22.958-0:03:23.224	IT1	0.0465631	8	0.174439
Trial 1	M1-2	C-P	M	0:03:23.224-0:03:23.490	IT1	0.126707	8	0.474677
Trial 1	M1-2	C-P	M	0:03:23.490-0:03:23.756	IT1	0.438391	8	1.64232
Trial 1	M1-2	C-P	M	0:03:23.756-0:03:24.022	IT1	0.329196	8	1.23325
Trial 1	M1-2	C-P	M	0:03:24.022-0:03:24.288	IT1	0.144089	8	0.539794
Trial 1	M1-2	C-P	M	0:03:24.288-0:03:24.554	IT1	0.226384	8	0.848093
Trial 1	M1-2	C-P	M	0:03:24.554-0:03:24.820	IT1	0.101383	8	0.379804
Trial 1	M1-2	C-P	M	0:03:24.820-0:03:25.086	IT1	0.265946	8	0.996298
Trial 1	M1-2	C-P	M	0:03:25.086-0:03:25.352	IT1	0.168352	8	0.63069
Trial 1	M1-2	C-P	M	0:03:25.352-0:03:25.618	IT1	0.905719	8	3.39304
Trial 1	M1-2	C-P	M	0:03:25.618-0:03:25.884	IT1	0.376189	8	1.4093
Trial 1	M1-2	C-P	M	0:03:25.884-0:03:26.150	IT1	0.561905	8	2.10504
Trial 1	M1-2	C-P	M	0:03:26.150-0:03:26.416	IT1	0.42055	8	1.57547
Trial 1	M1-2	C-P	M	0:03:26.416-0:03:26.682	IT1	0.719696	8	2.69617
Trial 1	M1-2	C-P	M	0:03:26.682-0:03:26.948	IT1	1.42129	8	5.3245
Trial 1	M1-2	C-P	M	0:03:26.948-0:03:27.214	IT1	1.0872	8	4.07293
Trial 1	M1-2	C-P	M	0:03:27.214-0:03:27.480	IT1	0.496015	8	1.85821
Trial 1	M1-2	C-P	M	0:03:27.480-0:03:27.746	IT1	0.875	8	3.27797
Trial 1	M1-2	C-P	M	0:03:27.746-0:03:28.012	IT1	1.05881	8	3.96655
Trial 1	M1-2	C-P	M	0:03:28.012-0:03:28.278	IT1	1.00674	8	3.77148
Trial 1	M1-2	C-P	M	0:03:28.278-0:03:28.544	IT1	2.98456	8	11.1809
Trial 1	M1-2	C-P	M	0:03:28.544-0:03:28.810	IT1	3.42717	8	12.8391
Trial 1	M1-2	C-P	M	0:03:28.810-0:03:29.076	IT1	0.721013	8	2.70109
Trial 1	M1-2	C-P	M	0:03:29.076-0:03:29.342	IT1	1.06052	7	4.54055
Trial 1	M1-2	C-P	M	0:03:29.342-0:03:29.608	IT1	0.502282	8	1.88168
Trial 1	M1-2	C-P	M	0:03:29.608-0:03:29.874	IT1	0.61252	8	2.29465
Trial 1	M1-2	C-P	M	0:03:29.874-0:03:30.140	IT1	0.366143	8	1.37166
Trial 1	M1-2	C-P	M	0:03:30.140-0:03:30.406	IT1	0.337635	8	1.26486
Trial 1	M1-2	C-P	M	0:03:30.406-0:03:30.672	IT1	0.600639	8	2.25015
Trial 1	M1-2	C-P	M	0:03:30.672-0:03:30.938	IT1	0.948583	8	3.55363
Trial 1	M1-2	C-P	M	0:03:30.938-0:03:31.204	IT1	2.00915	8	7.52676
Trial 1	M1-2	C-P	M	0:03:31.204-0:03:31.470	IT1	1.55884	8	5.83984
Trial 1	M1-2	C-P	M	0:03:31.470-0:03:31.736	IT1	0.814343	8	3.05073
Trial 1	M1-2	C-P	M	0:03:31.736-0:03:32.002	IT1	0.533187	8	1.99745
Trial 1	M1-2	C-P	M	0:03:32.002-0:03:32.268	IT1	0.305676	8	1.14513
Trial 1	M1-2	C-P	M	0:03:32.268-0:03:32.534	IT1	0.652632	8	2.44492
Trial 1	M1-2	C-P	M	0:03:32.534-0:03:32.800	IT1	0.401469	8	1.504
Trial 1	M1-2	C-P	M	0:03:32.800-0:03:33.066	IT1	0.233302	8	0.874004
Trial 1	M1-2	C-P	M	0:03:33.066-0:03:33.332	IT1	0.611894	8	2.29231
Trial 1	M1-2	C-P	M	0:03:33.332-0:03:33.598	IT1	0.580044	8	2.173
Trial 1	M1-2	C-P	M	0:03:33.598-0:03:33.864	IT1	0.607154	8	2.27454
Trial 1	M1-2	C-P	M	0:03:33.864-0:03:34.130	IT1	1.16689	8	4.37148
Trial 1	M1-2	C-P	M	0:03:34.130-0:03:34.396	IT1	1.29103	8	4.83651
Trial 1	M1-2	C-P	M	0:03:34.396-0:03:34.662	IT1	1.87945	8	7.04086
Trial 1	M1-2	C-P	M	0:03:34.662-0:03:34.928	IT1	2.70992	8	10.152
Trial 1	M1-2	C-P	M	0:03:34.928-0:03:35.194	IT1	4.136	8	15.4944
Trial 1	M1-2	C-P	M	0:03:35.194-0:03:35.460	IT1	1.45621	8	5.45536
Trial 1	M1-2	C-P	M	0:03:35.460-0:03:35.726	IT1	4.89639	8	18.3431
Trial 1	M1-2	C-P	M	0:03:35.726-0:03:35.992	IT1	1.79754	8	6.73398
Trial 1	M1-2	C-P	M	0:03:35.992-0:03:36.258	IT1	2.01554	8	7.55074
Trial 1	M1-2	C-P	M	0:03:36.258-0:03:36.524	IT1	0.399878	8	1.49804
Trial 1	M1-2	C-P	M	0:03:36.524-0:03:36.790	IT1	0.56956	8	2.13373
Trial 1	M1-2	C-P	M	0:03:36.790-0:03:37.056	IT1	0.476135	8	1.78371
Trial 1	M1-2	C-P	M	0:03:37.056-0:03:37.322	IT1	0.085698	8	0.321047
Trial 1	M1-2	C-P	M	0:03:37.322-0:03:37.588	IT1	0.925211	8	3.46607
Trial 1	M1-2	C-P	M	0:03:37.588-0:03:37.854	IT1	0.958728	8	3.59162
Trial 1	M1-2	C-P	M	0:03:37.854-0:03:38.120	IT1	0.84347	8	3.15985
Trial 1	M1-2	C-P	M	0:03:38.120-0:03:38.386	IT1	0.834662	8	3.12685
Trial 1	M1-2	C-P	M	0:03:38.386-0:03:38.652	IT1	0.67229	8	2.51858
Trial 1	M1-2	C-P	M	0:03:38.652-0:03:38.918	IT1	1.24447	7	5.32811
Trial 1	M1-2	C-P	M	0:03:38.918-0:03:39.184	IT1	0.0305596	8	0.114484
Trial 1	M1-2	C-P	M	0:03:39.184-0:03:39.450	IT1	0.617847	8	2.31462
Trial 1	M1-2	C-P	M	0:03:39.450-0:03:39.716	IT1	0.684847	8	2.56562
Trial 1	M1-2	C-P	M	0:03:39.716-0:03:39.982	IT1	0.920852	8	3.44972
Trial 1	M1-2	C-P	M	0:03:39.982-0:03:40.248	IT1	0.933331	8	3.49648
Trial 1	M1-2	C-P	M	0:03:40.248-0:03:40.514	IT1	7.26569	8	27.219
Trial 1	M1-2	C-P	M	0:03:40.514-0:03:40.780	IT1	4.43452	8	16.6129
Trial 1	M1-2	C-P	M	0:03:40.780-0:03:41.046	IT1	4.51073	8	16.8983
Trial 1	M1-2	C-P	M	0:03:41.046-0:03:41.312	IT1	4.1006	8	15.3618
Trial 1	M1-2	C-P	M	0:03:41.312-0:03:41.578	IT1	0.927934	8	3.47627
Trial 1	M1-2	C-P	M	0:03:41.578-0:03:41.844	IT1	0.5673	8	2.12525
Trial 1	M1-2	C-P	M	0:03:41.844-0:03:42.110	IT1	0.550928	8	2.06391
Trial 1	M1-2	C-P	M	0:03:42.110-0:03:42.376	IT1	1.35378	8	5.07161
Trial 1	M1-2	C-P	M	0:03:42.376-0:03:42.642	IT1	0.586824	8	2.19837
Trial 1	M1-2	C-P	M	0:03:42.642-0:03:42.908	IT1	0.836428	8	3.13346
Trial 1	M1-2	C-P	M	0:03:42.908-0:03:43.174	IT1	1.83558	8	6.87657
Trial 1	M1-2	C-P	M	0:03:43.174-0:03:43.440	IT1	1.69535	8	6.3512
Trial 1	M1-2	C-P	M	0:03:43.440-0:03:43.706	IT1	0.571833	8	2.14224
Trial 1	M1-2	C-P	M	0:03:43.706-0:03:43.972	IT1	1.5413	8	5.77412
Trial 1	M1-2	C-P	M	0:03:43.972-0:03:44.238	IT1	1.87669	8	7.03053
Trial 1	M1-2	C-P	M	0:03:44.238-0:03:44.504	IT1	0.960927	8	3.59986
Trial 1	M1-2	C-P	M	0:03:44.504-0:03:44.770	IT1	1.24205	8	4.65304
Trial 1	M1-2	C-P	M	0:03:44.770-0:03:45.036	IT1	1.24614	8	4.66836
Trial 1	M1-2	C-P	M	0:03:45.036-0:03:45.302	IT1	0.968677	8	3.62891
Trial 1	M1-2	C-P	M	0:03:45.302-0:03:45.568	IT1	0.494261	8	1.85162
Trial 1	M1-2	C-P	M	0:03:45.568-0:03:45.834	IT1	0.868599	8	3.25399
Trial 1	M1-2	C-P	M	0:03:45.834-0:03:46.100	IT1	0.783982	8	2.937
Trial 1	M1-2	C-P	M	0:03:46.100-0:03:46.366	IT1	0.428735	8	1.60615
Trial 1	M1-2	C-P	M	0:03:46.366-0:03:46.632	IT1	0.236387	8	0.885565
Trial 1	M1-2	C-P	M	0:03:46.632-0:03:46.898	IT1	0.196863	8	0.737499
Trial 1	M1-2	C-P	M	0:03:46.898-0:03:47.164	IT1	0.468155	8	1.75383
Trial 1	M1-2	C-P	M	0:03:47.164-0:03:47.430	IT1	0.565664	8	2.11911
Trial 1	M1-2	C-P	M	0:03:47.430-0:03:47.696	IT1	0.575016	8	2.15415
Trial 1	M1-2	C-P	M	0:03:47.696-0:03:47.962	IT1	0.328951	8	1.23233
Trial 1	M1-2	C-P	M	0:03:47.962-0:03:48.228	IT1	0.106618	7	0.456477
Trial 1	M1-2	C-P	M	0:03:48.228-0:03:48.494	IT1	0.115023	8	0.430904
Trial 1	M1-2	C-P	M	0:03:48.494-0:03:48.760	IT1	1.19065	8	4.46046
Trial 1	M1-2	C-P	M	0:03:48.760-0:03:49.026	IT1	1.0241	8	3.83653
Trial 1	M1-2	C-P	M	0:03:49.026-0:03:49.292	IT1	1.63933	8	6.14135
Trial 1	M1-2	C-P	M	0:03:49.292-0:03:49.558	IT1	0.423784	8	1.5876
Trial 1	M1-2	C-P	M	0:03:49.558-0:03:49.824	IT1	0.185021	8	0.693132
Trial 1	M1-2	C-P	M	0:03:49.824-0:03:50.090	IT1	0.620892	8	2.32601
Trial 1	M1-2	C-P	M	0:03:50.090-0:03:50.356	IT1	0.480899	8	1.80157
Trial 1	M1-2	C-P	M	0:03:50.356-0:03:50.622	IT1	0.684138	8	2.56296
Trial 1	M1-2	C-P	M	0:03:50.622-0:03:50.888	IT1	1.26377	8	4.73439
Trial 1	M1-2	C-P	M	0:03:50.888-0:03:51.154	IT1	2.22147	8	8.3222
Trial 1	M1-2	C-P	M	0:03:51.154-0:03:51.420	IT1	2.52634	8	9.46428
Trial 1	M1-2	C-P	M	0:03:51.420-0:03:51.686	IT1	1.47499	8	5.52566
Trial 1	M1-2	C-P	M	0:03:51.686-0:03:51.952	IT1	1.15037	8	4.30955
Trial 1	M1-2	C-P	M	0:03:51.952-0:03:52.218	IT1	0.271624	8	1.01757
Trial 1	M1-2	C-P	M	0:03:52.218-0:03:52.484	IT1	0.188524	8	0.70626
Trial 1	M1-2	C-P	M	0:03:52.484-0:03:52.750	IT1	0.188524	8	0.706257
Trial 1	M1-2	C-P	M	0:03:52.750-0:03:53.016	IT1	0.188524	8	0.706257
Trial 1	M1-2	C-P	M	0:03:53.016-0:03:53.282	IT1	0.188524	8	0.70626
Trial 1	M1-2	C-P	M	0:03:53.282-0:03:53.548	IT1	0.188524	8	0.706257
Trial 1	M1-2	C-P	M	0:03:53.548-0:03:53.814	IT1	0.188524	8	0.70626
Trial 1	M1-2	C-P	M	0:03:53.814-0:03:54.080	IT1	0.188524	8	0.706257
Trial 1	M1-2	C-P	M	0:03:54.080-0:03:54.346	IT1	0.188524	8	0.706257
Trial 1	M1-2	C-P	M	0:03:54.346-0:03:54.612	IT1	0.188524	8	0.70626
Trial 1	M1-2	C-P	M	0:03:54.612-0:03:54.878	IT1	0.188524	8	0.706257
Trial 1	M1-2	C-P	M	0:03:54.878-0:03:55.144	IT1	0.188524	8	0.70626
Trial 1	M1-2	C-P	M	0:03:55.144-0:03:55.410	IT1	0.188524	8	0.706257
Trial 1	M1-2	C-P	M	0:03:55.410-0:03:55.676	IT1	0.188524	8	0.706257
Trial 1	M1-2	C-P	M	0:03:55.676-0:03:55.942	IT1	0.188524	8	0.70626
Trial 1	M1-2	C-P	M	0:03:55.942-0:03:56.208	IT1	0.188524	8	0.706257
Trial 1	M1-2	C-P	M	0:03:56.208-0:03:56.474	IT1	0.188524	8	0.70626
Trial 1	M1-2	C-P	M	0:03:56.474-0:03:56.740	IT1	0.188524	8	0.706257
Trial 1	M1-2	C-P	M	0:03:56.740-0:03:57.006	IT1	0.188524	8	0.706257
Trial 1	M1-2	C-P	M	0:03:57.006-0:03:57.272	IT1	0.188524	8	0.70626
Trial 1	M1-2	C-P	M	0:03:57.272-0:03:57.538	IT1	0.188524	8	0.706257
Trial 1	M1-2	C-P	M	0:03:57.538-0:03:57.804	IT1	0.164959	7	0.706258
Trial 1	M1-2	C-P	M	0:03:57.804-0:03:58.070	IT1	0.188524	8	0.70626
Trial 1	M1-2	C-P	M	0:03:58.070-0:03:58.336	IT1	0.188524	8	0.706257
Trial 1	M1-2	C-P	M	0:03:58.336-0:03:58.602	IT1	0.188524	8	0.706257
Trial 1	M1-2	C-P	M	0:03:58.602-0:03:58.868	IT1	0.188524	8	0.70626
Trial 1	M1-2	C-P	M	0:03:58.868-0:03:59.134	IT1	1.20544	8	4.5159
Trial 1	M1-2	C-P	M	0:03:59.134-0:03:59.400	IT1	0.758512	8	2.84158
Trial 1	M1-2	C-P	M	0:03:59.400-0:03:59.666	IT1	0.951135	8	3.56318
Trial 1	M1-2	C-P	M	0:03:59.666-0:03:59.932	IT1	0.030278	8	0.113429
Trial 1	M1-2	C-P	M	0:03:59.932-0:04:00.198	IT1	0.030278	8	0.113429
Trial 1	M1-2	C-P	M	0:04:00.198-0:04:00.464	IT1	0.030278	8	0.113429
Trial 1	M1-2	C-P	M	0:04:00.464-0:04:00.730	IT1	0.030278	8	0.113429
Trial 1	M1-2	C-P	M	0:04:00.730-0:04:00.996	IT1	0.030278	8	0.113429
Trial 1	M1-2	C-P	M	0:04:00.996-0:04:01.262	IT1	0.030278	8	0.113429
Trial 1	M1-2	C-P	M	0:04:01.262-0:04:01.528	IT1	0.030278	8	0.113429
Trial 1	M1-2	C-P	M	0:04:01.528-0:04:01.794	IT1	0.030278	8	0.113429
Trial 1	M1-2	C-P	M	0:04:01.794-0:04:02.060	IT1	0.622128	8	2.33066
Trial 1	M1-2	C-P	M	0:04:02.060-0:04:02.326	IT1	0.371001	8	1.38986
Trial 1	M1-2	C-P	M	0:04:02.326-0:04:02.592	IT1	0.0442072	8	0.165611
Trial 1	M1-2	C-P	M	0:04:02.592-0:04:02.858	IT1	0.0442072	8	0.165612
Trial 1	M1-2	C-P	M	0:04:02.858-0:04:03.124	IT1	0.0442072	8	0.165611
Trial 1	M1-2	C-P	M	0:04:03.124-0:04:03.390	IT1	0.0442072	8	0.165612
Trial 1	M1-2	C-P	M	0:04:03.390-0:04:03.656	IT1	0.0442072	8	0.165611
Trial 1	M1-2	C-P	M	0:04:03.656-0:04:03.922	IT1	0.0442072	8	0.165611
Trial 1	M1-2	C-P	M	0:04:03.922-0:04:04.188	IT1	0.0442072	8	0.165612
Trial 1	M1-2	C-P	M	0:04:04.188-0:04:04.454	IT1	0.0442072	8	0.165611
Trial 1	M1-2	C-P	M	0:04:04.454-0:04:04.720	IT1	0.0442072	8	0.165612
Trial 1	M1-2	C-P	M	0:04:04.720-0:04:04.986	IT1	0.0442072	8	0.165611
Trial 1	M1-2	C-P	M	0:04:04.986-0:04:05.252	IT1	0.0442072	8	0.165611
Trial 1	M1-2	C-P	M	0:04:05.252-0:04:05.518	IT1	0.0442072	8	0.165612
Trial 1	M1-2	C-P	M	0:04:05.518-0:04:05.784	IT1	0.0442072	8	0.165611
Trial 1	M1-2	C-P	M	0:04:05.784-0:04:06.050	IT1	0.0442072	8	0.165612
Trial 1	M1-2	C-P	M	0:04:06.050-0:04:06.316	IT1	0.0442072	8	0.165611
Trial 1	M1-2	C-P	M	0:04:06.316-0:04:06.582	IT1	0.0442072	8	0.165611
Trial 1	M1-2	C-P	M	0:04:06.582-0:04:06.848	IT1	0.0442072	8	0.165612
Trial 1	M1-2	C-P	M	0:04:06.848-0:04:07.114	IT1	0.0442072	8	0.165611
Trial 1	M1-2	C-P	M	0:04:07.114-0:04:07.380	IT1	0.0386813	7	0.165611
Trial 1	M1-2	C-P	M	0:04:07.380-0:04:07.646	IT1	0.0442072	8	0.165612
Trial 1	M1-2	C-P	M	0:04:07.646-0:04:07.912	IT1	0.0442072	8	0.165611
Trial 1	M1-2	C-P	M	0:04:07.912-0:04:08.178	IT1	0.0442072	8	0.165612
Trial 1	M1-2	C-P	M	0:04:08.178-0:04:08.444	IT1	0.0442072	8	0.165611
Trial 1	M1-2	C-P	M	0:04:08.444-0:04:08.710	IT1	1.61593	8	6.05364
Trial 1	M1-2	C-P	M	0:04:08.710-0:04:08.976	IT1	1.49255	8	5.59148
Trial 1	M1-2	C-P	M	0:04:08.976-0:04:09.242	IT1	1.54119	8	5.77365
Trial 1	M1-2	C-P	M	0:04:09.242-0:04:09.508	IT1	1.2096	8	4.53151
Trial 1	M1-2	C-P	M	0:04:09.508-0:04:09.774	IT1	1.92152	8	7.19849
Trial 1	M1-2	C-P	M	0:04:09.774-0:04:10.040	IT1	0.900739	8	3.37438
Trial 1	M1-2	C-P	M	0:04:10.040-0:04:10.306	IT1	8.47895	8	31.7643
Trial 1	M1-2	C-P	M	0:04:10.306-0:04:10.572	IT1	0.750739	8	2.81244
Trial 1	M1-2	C-P	M	0:04:10.572-0:04:10.838	IT1	4.19371	8	15.7106
Trial 1	M1-2	C-P	M	0:04:10.838-0:04:11.104	IT1	0.296364	8	1.11025
Trial 1	M1-2	C-P	M	0:04:11.104-0:04:11.370	IT1	0.220368	8	0.825547
Trial 1	M1-2	C-P	M	0:04:11.370-0:04:11.636	IT1	0.310767	8	1.16421
Trial 1	M1-2	C-P	M	0:04:11.636-0:04:11.902	IT1	0.294506	8	1.10329
Trial 1	M1-2	C-P	M	0:04:11.902-0:04:12.168	IT1	0.394802	8	1.47902
Trial 1	M1-2	C-P	M	0:04:12.168-0:04:12.434	IT1	0.323	8	1.21004
Trial 1	M1-2	C-P	M	0:04:12.434-0:04:12.700	IT1	0.407708	8	1.52737
Trial 1	M1-2	C-P	M	0:04:12.700-0:04:12.966	IT1	0.687629	8	2.57604
Trial 1	M1-2	C-P	M	0:04:12.966-0:04:13.232	IT1	0.717677	8	2.6886
Trial 1	M1-2	C-P	M	0:04:13.232-0:04:13.498	IT1	0.674979	8	2.52863
Trial 1	M1-2	C-P	M	0:04:13.498-0:04:13.764	IT1	1.0973	8	4.11076
Trial 1	M1-2	C-P	M	0:04:13.764-0:04:14.030	IT1	1.03387	8	3.87313
Trial 1	M1-2	C-P	M	0:04:14.030-0:04:14.296	IT1	0.574438	8	2.15199
Trial 1	M1-2	C-P	M	0:04:14.296-0:04:14.562	IT1	0.258413	8	0.968076
Trial 1	M1-2	C-P	M	0:04:14.562-0:04:14.828	IT1	1.96827	8	7.37364
Trial 1	M1-2	C-P	M	0:04:14.828-0:04:15.094	IT1	2.61177	8	9.78433
Trial 1	M1-2	C-P	M	0:04:15.094-0:04:15.360	IT1	2.29127	8	8.58363
Trial 1	M1-2	C-P	M	0:04:15.360-0:04:15.626	IT1	1.14956	8	4.30655
Trial 1	M1-2	C-P	M	0:04:15.626-0:04:15.892	IT1	1.05706	8	3.96002
Trial 1	M1-2	C-P	M	0:04:15.892-0:04:16.158	IT1	2.62437	8	9.83155
Trial 1	M1-2	C-P	M	0:04:16.158-0:04:16.424	IT1	1.90473	8	7.13556
Trial 1	M1-2	C-P	M	0:04:16.424-0:04:16.690	IT1	2.0706	7	8.86512
Trial 1	M1-2	C-P	M	0:04:16.690-0:04:16.956	IT1	0.831132	8	3.11362
Trial 1	M1-2	C-P	M	0:04:16.956-0:04:17.222	IT1	0.602813	8	2.25829
Trial 1	M1-2	C-P	M	0:04:17.222-0:04:17.488	IT1	1.62893	8	6.10236
Trial 1	M1-2	C-P	M	0:04:17.488-0:04:17.754	IT1	1.74907	8	6.55249
Trial 1	M1-2	C-P	M	0:04:17.754-0:04:18.020	IT1	1.13054	8	4.23528
Trial 1	M1-2	C-P	M	0:04:18.020-0:04:18.286	IT1	0.854007	8	3.19931
Trial 1	M1-2	C-P	M	0:04:18.286-0:04:18.552	IT1	0.956349	8	3.58272
Trial 1	M1-2	C-P	M	0:04:18.552-0:04:18.818	IT1	0.612874	8	2.29598
Trial 1	M1-2	C-P	M	0:04:18.818-0:04:19.084	IT1	0.137683	8	0.515795
Trial 1	M1-2	C-P	M	0:04:19.084-0:04:19.350	IT1	0.300524	8	1.12584
Trial 1	M1-2	C-P	M	0:04:19.350-0:04:19.616	IT1	0.124259	8	0.465507
Trial 1	M1-2	C-P	M	0:04:19.616-0:04:19.882	IT1	0.449519	8	1.68401
Trial 1	M1-2	C-P	M	0:04:19.882-0:04:20.148	IT1	1.53244	8	5.74087
Trial 1	M1-2	C-P	M	0:04:20.148-0:04:20.414	IT1	1.31693	8	4.93358
Trial 1	M1-2	C-P	M	0:04:20.414-0:04:20.680	IT1	2.48167	8	9.2969
Trial 1	M1-2	C-P	M	0:04:20.680-0:04:20.946	IT1	0.979125	8	3.66805
Trial 1	M1-2	C-P	M	0:04:20.946-0:04:21.212	IT1	0.834875	8	3.12766
Trial 1	M1-2	C-P	M	0:04:21.212-0:04:21.478	IT1	1.80493	8	6.76169
Trial 1	M1-2	C-P	M	0:04:21.478-0:04:21.744	IT1	1.39795	8	5.23712
Trial 1	M1-2	C-P	M	0:04:21.744-0:04:22.010	IT1	0.897952	8	3.36394
Trial 1	M1-2	C-P	M	0:04:22.010-0:04:22.276	IT1	0.909446	8	3.40701
Trial 1	M1-2	C-P	M	0:04:22.276-0:04:22.542	IT1	2.0899	8	7.82929
Trial 1	M1-2	C-P	M	0:04:22.542-0:04:22.808	IT1	0.446311	8	1.672
Trial 1	M1-2	C-P	M	0:04:22.808-0:04:23.074	IT1	1.37796	8	5.16219
Trial 1	M1-2	C-P	M	0:04:23.074-0:04:23.340	IT1	0.86451	8	3.23866
Trial 1	M1-2	C-P	M	0:04:23.340-0:04:23.606	IT1	0.439161	8	1.6452
Trial 1	M1-2	C-P	M	0:04:23.606-0:04:23.872	IT1	0.773579	8	2.89804
Trial 1	M1-2	C-P	M	0:04:23.872-0:04:24.138	IT1	0.275578	8	1.03239
Trial 1	M1-2	C-P	M	0:04:24.138-0:04:24.404	IT1	0.268313	8	1.00517
Trial 1	M1-2	C-P	M	0:04:24.404-0:04:24.670	IT1	0.43456	8	1.62797
Trial 1	M1-2	C-P	M	0:04:24.670-0:04:24.936	IT1	0.328203	8	1.22953
Trial 1	M1-2	C-P	M	0:04:24.936-0:04:25.202	IT1	0.363987	8	1.36359
Trial 1	M1-2	C-P	M	0:04:25.202-0:04:25.468	IT1	0.66473	8	2.49024
Trial 1	M1-2	C-P	M	0:04:25.468-0:04:25.734	IT1	0.533351	8	1.99808
Trial 1	M1-2	C-P	M	0:04:25.734-0:04:26.000	IT1	0.839401	8	3.14461
Trial 1	M1-2	C-P	M	0:04:26.000-0:04:26.266	IT1	0.416777	7	1.7844
Trial 1	M1-2	C-P	M	0:04:26.266-0:04:26.532	IT1	0.199447	8	0.74718
Trial 1	M1-2	C-P	M	0:04:26.532-0:04:26.798	IT1	0.328373	8	1.23017
Trial 1	M1-2	C-P	M	0:04:26.798-0:04:27.064	IT1	0.878234	8	3.29008
Trial 1	M1-2	C-P	M	0:04:27.064-0:04:27.330	IT1	5.17898	8	19.4017
Trial 1	M1-2	C-P	M	0:04:27.330-0:04:27.596	IT1	1.87142	8	7.01074
Trial 1	M1-2	C-P	M	0:04:27.596-0:04:27.862	IT1	0.494077	8	1.85094
Trial 1	M1-2	C-P	M	0:04:27.862-0:04:28.128	IT1	0.614166	8	2.30085
Trial 1	M1-2	C-P	M	0:04:28.128-0:04:28.394	IT1	0.566011	8	2.1204
Trial 1	M1-2	C-P	M	0:04:28.394-0:04:28.660	IT1	5.97276	8	22.3755
Trial 1	M1-2	C-P	M	0:04:28.660-0:04:28.926	IT1	1.109	8	4.15458
Trial 1	M1-2	C-P	M	0:04:28.926-0:04:29.192	IT1	0.495956	8	1.85798
Trial 1	M1-2	C-P	M	0:04:29.192-0:04:29.458	IT1	0.754822	8	2.82774
Trial 1	M1-2	C-P	M	0:04:29.458-0:04:29.724	IT1	0.385362	8	1.44367
Trial 1	M1-2	C-P	M	0:04:29.724-0:04:29.990	IT1	0.266049	8	0.996687
Trial 1	M1-2	C-P	M	0:04:29.990-0:04:30.256	IT1	0.573201	8	2.14735
Trial 1	M1-2	C-P	M	0:04:30.256-0:04:30.522	IT1	0.528525	8	1.97999
Trial 1	M1-2	C-P	M	0:04:30.522-0:04:30.788	IT1	1.40855	8	5.27676
Trial 1	M1-2	C-P	M	0:04:30.788-0:04:31.054	IT1	0.897052	8	3.36057
Trial 1	M1-2	C-P	M	0:04:31.054-0:04:31.320	IT1	0.93582	8	3.50582
Trial 1	M1-2	C-P	M	0:04:31.320-0:04:31.586	IT1	1.13978	8	4.26991
Trial 1	M1-2	C-P	M	0:04:31.586-0:04:31.852	IT1	2.3952	8	8.97304
Trial 1	M1-2	C-P	M	0:04:31.852-0:04:32.118	IT1	2.89162	8	10.8327
Trial 1	M1-2	C-P	M	0:04:32.118-0:04:32.384	IT1	1.33206	8	4.9902
Trial 1	M1-2	C-P	M	0:04:32.384-0:04:32.650	IT1	1.65345	8	6.19424
Trial 1	M1-2	C-P	M	0:04:32.650-0:04:32.916	IT1	0.821327	8	3.0769
Trial 1	M1-2	C-P	M	0:04:32.916-0:04:33.182	IT1	1.56522	8	5.8637
Trial 1	M1-2	C-P	M	0:04:33.182-0:04:33.448	IT1	2.25346	8	8.44202
Trial 1	M1-2	C-P	M	0:04:33.448-0:04:33.714	IT1	2.68876	8	10.0728
Trial 1	M1-2	C-P	M	0:04:33.714-0:04:33.980	IT1	1.02023	8	3.82203
Trial 1	M1-2	C-P	M	0:04:33.980-0:04:34.246	IT1	0.954083	8	3.57422
Trial 1	M1-2	C-P	M	0:04:34.246-0:04:34.512	IT1	1.86882	8	7.00107
Trial 1	M1-2	C-P	M	0:04:34.512-0:04:34.778	IT1	1.44319	8	5.40652
Trial 1	M1-2	C-P	M	0:04:34.778-0:04:35.044	IT1	2.15197	8	8.06182
Trial 1	M1-2	C-P	M	0:04:35.044-0:04:35.310	IT1	3.61328	8	13.5363
Trial 1	M1-2	C-P	M	0:04:35.310-0:04:35.576	IT1	3.58829	8	13.4426
Trial 1	M1-2	C-P	M	0:04:35.576-0:04:35.842	IT1	1.49368	7	6.39505
Trial 1	M1-2	C-P	M	0:04:35.842-0:04:36.108	IT1	2.33838	8	8.76016
Trial 1	M1-2	C-P	M	0:04:36.108-0:04:36.374	IT1	0.337227	8	1.26334
Trial 1	M1-2	C-P	M	0:04:36.374-0:04:36.640	IT1	1.24649	8	4.66962
Trial 1	M1-2	C-P	M	0:04:36.640-0:04:36.906	IT1	1.90606	8	7.14063
Trial 1	M1-2	C-P	M	0:04:36.906-0:04:37.172	IT1	0.468158	8	1.75384
Trial 1	M1-2	C-P	M	0:04:37.172-0:04:37.438	IT1	0.519266	8	1.9453
Trial 1	M1-2	C-P	M	0:04:37.438-0:04:37.704	IT1	0.370388	8	1.38757
Trial 1	M1-2	C-P	M	0:04:37.704-0:04:37.970	IT1	0.294473	8	1.10317
Trial 1	M1-2	C-P	M	0:04:37.970-0:04:38.236	IT1	1.06253	8	3.98049
Trial 1	M1-2	C-P	M	0:04:38.236-0:04:38.502	IT1	0.514987	8	1.92926
Trial 1	M1-2	C-P	M	0:04:38.502-0:04:38.768	IT1	0.460782	8	1.72621
Trial 1	M1-2	C-P	M	0:04:38.768-0:04:39.034	IT1	0.127781	8	0.478698
Trial 1	M1-2	C-P	M	0:04:39.034-0:04:39.300	IT1	0.476532	8	1.7852
Trial 1	M1-2	C-P	M	0:04:39.300-0:04:39.566	IT1	0.247846	8	0.928496
Trial 1	M1-2	C-P	M	0:04:39.566-0:04:39.832	IT1	0.850097	8	3.18467
Trial 1	M1-2	C-P	M	0:04:39.832-0:04:40.098	IT1	0.690144	8	2.58545
Trial 1	M1-2	C-P	M	0:04:40.098-0:04:40.364	IT1	0.550287	8	2.0615
Trial 1	M1-2	C-P	M	0:04:40.364-0:04:40.630	IT1	0.863652	8	3.23545
Trial 1	M1-2	C-P	M	0:04:40.630-0:04:40.896	IT1	0.476972	8	1.78686
Trial 1	M1-2	C-P	M	0:04:40.896-0:04:41.162	IT1	0.274732	8	1.02921
Trial 1	M1-2	C-P	M	0:04:41.162-0:04:41.428	IT1	0.30619	8	1.14707
Trial 1	M1-2	C-P	M	0:04:41.428-0:04:41.694	IT1	0.758453	8	2.84134
Trial 1	M1-2	C-P	M	0:04:41.694-0:04:41.960	IT1	1.83581	8	6.87738
Trial 1	M1-2	C-P	M	0:04:41.960-0:04:42.226	IT1	1.55774	8	5.83572
Trial 1	M1-2	C-P	M	0:04:42.226-0:04:42.492	IT1	1.56726	8	5.87134
Trial 1	M1-2	C-P	M	0:04:42.492-0:04:42.758	IT1	0.549577	8	2.05887
Trial 1	M1-2	C-P	M	0:04:42.758-0:04:43.024	IT1	0.417751	8	1.56499
Trial 1	M1-2	C-P	M	0:04:43.024-0:04:43.290	IT1	0.801476	8	3.00252
Trial 1	M1-2	C-P	M	0:04:43.290-0:04:43.556	IT1	0.303207	8	1.13589
Trial 1	M1-2	C-P	M	0:04:43.556-0:04:43.822	IT1	0.173895	8	0.651452
Trial 1	M1-2	C-P	M	0:04:43.822-0:04:44.088	IT1	0.524014	8	1.9631
Trial 1	M1-2	C-P	M	0:04:44.088-0:04:44.354	IT1	1.40761	8	5.27325
Trial 1	M1-2	C-P	M	0:04:44.354-0:04:44.620	IT1	3.44449	8	12.9039
Trial 1	M1-2	C-P	M	0:04:44.620-0:04:44.886	IT1	4.46773	8	16.7372
Trial 1	M1-2	C-P	M	0:04:44.886-0:04:45.152	IT1	4.6528	8	17.4305
Trial 1	M1-2	C-P	M	0:04:45.152-0:04:45.418	IT1	1.05294	7	4.50808
Trial 1	M1-2	C-P	M	0:04:45.418-0:04:45.684	IT1	1.86663	8	6.99286
Trial 1	M1-2	C-P	M	0:04:45.684-0:04:45.950	IT1	0.902292	8	3.38021
Trial 1	M1-2	C-P	M	0:04:45.950-0:04:46.216	IT1	0.697579	8	2.61332
Trial 1	M1-2	C-P	M	0:04:46.216-0:04:46.482	IT1	0.793383	8	2.9722
Trial 1	M1-2	C-P	M	0:04:46.482-0:04:46.748	IT1	0.562442	8	2.10704
Trial 1	M1-2	C-P	M	0:04:46.748-0:04:47.014	IT1	0.13519	8	0.506459
Trial 1	M1-2	C-P	M	0:04:47.014-0:04:47.280	IT1	0.361939	8	1.35592
Trial 1	M1-2	C-P	M	0:04:47.280-0:04:47.546	IT1	0.0952365	8	0.356779
Trial 1	M1-2	C-P	M	0:04:47.546-0:04:47.812	IT1	0.520489	8	1.94987
Trial 1	M1-2	C-P	M	0:04:47.812-0:04:48.078	IT1	0.590417	8	2.21185
Trial 1	M1-2	C-P	M	0:04:48.078-0:04:48.344	IT1	0.942311	8	3.53015
Trial 1	M1-2	C-P	M	0:04:48.344-0:04:48.610	IT1	0.572545	8	2.1449
Trial 1	M1-2	C-P	M	0:04:48.610-0:04:48.876	IT1	0.333784	8	1.25045
Trial 1	M1-2	C-P	M	0:04:48.876-0:04:49.142	IT1	0.532329	8	1.99424
Trial 1	M1-2	C-P	M	0:04:49.142-0:04:49.408	IT1	1.26384	8	4.73466
Trial 1	M1-2	C-P	M	0:04:49.408-0:04:49.674	IT1	0.770303	8	2.88576
Trial 1	M1-2	C-P	M	0:04:49.674-0:04:49.940	IT1	0.577655	8	2.16404
Trial 1	M1-2	C-P	M	0:04:49.940-0:04:50.206	IT1	0.70198	8	2.6298
Trial 1	M1-2	C-P	M	0:04:50.206-0:04:50.472	IT1	1.02856	8	3.85324
Trial 1	M1-2	C-P	M	0:04:50.472-0:04:50.738	IT1	1.69289	8	6.34199
Trial 1	M1-2	C-P	M	0:04:50.738-0:04:51.004	IT1	4.22796	8	15.839
Trial 1	M1-2	C-P	M	0:04:51.004-0:04:51.270	IT1	0.820881	8	3.07521
Trial 1	M1-2	C-P	M	0:04:51.270-0:04:51.536	IT1	0.877929	8	3.28893
Trial 1	M1-2	C-P	M	0:04:51.536-0:04:51.802	IT1	0.849789	8	3.18351
Trial 1	M1-2	C-P	M	0:04:51.802-0:04:52.068	IT1	3.51507	8	13.1683
Trial 1	M1-2	C-P	M	0:04:52.068-0:04:52.334	IT1	0.901917	8	3.37882
Trial 1	M1-2	C-P	M	0:04:52.334-0:04:52.600	IT1	0.755797	8	2.83139
Trial 1	M1-2	C-P	M	0:04:52.600-0:04:52.866	IT1	0.152653	8	0.571878
Trial 1	M1-2	C-P	M	0:04:52.866-0:04:53.132	IT1	0.133434	8	0.499874
Trial 1	M1-2	C-P	M	0:04:53.132-0:04:53.398	IT1	0.217925	8	0.816409
Trial 1	M1-2	C-P	M	0:04:53.398-0:04:53.664	IT1	0.267872	8	1.00353
Trial 1	M1-2	C-P	M	0:04:53.664-0:04:53.930	IT1	0.138692	8	0.51957
Trial 1	M1-2	C-P	M	0:04:53.930-0:04:54.196	IT1	0.0825998	8	0.30944
Trial 1	M1-2	C-P	M	0:04:54.196-0:04:54.462	IT1	0.169034	8	0.633241
Trial 1	M1-2	C-P	M	0:04:54.462-0:04:54.728	IT1	0.0669253	7	0.286538
Trial 1	M1-2	C-P	M	0:04:54.728-0:04:54.994	IT1	0.310302	8	1.16247
Trial 1	M1-2	C-P	M	0:04:54.994-0:04:55.260	IT1	0.187065	8	0.7008
Trial 1	M1-2	C-P	M	0:04:55.260-0:04:55.526	IT1	0.351555	8	1.31701
Trial 1	M1-2	C-P	M	0:04:55.526-0:04:55.792	IT1	0.0600374	8	0.224917
Trial 1	M1-2	C-P	M	0:04:55.792-0:04:56.058	IT1	0.0346772	8	0.129909
Trial 1	M1-2	C-P	M	0:04:56.058-0:04:56.324	IT1	0.593796	8	2.22451
Trial 1	M1-2	C-P	M	0:04:56.324-0:04:56.590	IT1	0.686819	8	2.57301
Trial 1	M1-2	C-P	M	0:04:56.590-0:04:56.856	IT1	0.373848	8	1.40053
Trial 1	M1-2	C-P	M	0:04:56.856-0:04:57.122	IT1	0.392046	8	1.46871
Trial 1	M1-2	C-P	M	0:04:57.122-0:04:57.388	IT1	0.476482	8	1.78502
Trial 1	M1-2	C-P	M	0:04:57.388-0:04:57.654	IT1	0.952103	8	3.5668
Trial 1	M1-2	C-P	M	0:04:57.654-0:04:57.920	IT1	0.445399	8	1.66858
Trial 1	M1-2	C-P	M	0:04:57.920-0:04:58.186	IT1	0.404245	8	1.5144
Trial 1	M1-2	C-P	M	0:04:58.186-0:04:58.452	IT1	0.95768	8	3.5877
Trial 1	M1-2	C-P	M	0:04:58.452-0:04:58.718	IT1	0.560062	8	2.09814
Trial 1	M1-2	C-P	M	0:04:58.718-0:04:58.984	IT1	0.513511	8	1.92374
Trial 1	M1-2	C-P	M	0:04:58.984-0:04:59.250	IT1	0.577481	8	2.16339
Trial 1	M1-2	C-P	M	0:04:59.250-0:04:59.516	IT1	1.49953	8	5.61761
Trial 1	M1-2	C-P	M	0:04:59.516-0:04:59.782	IT1	0.987619	8	3.69988
Trial 1	M1-2	C-P	M	0:04:59.782-0:05:00.048	IT1	0.695161	8	2.60425
Trial 1	M1-2	C-P	M	0:05:00.048-0:05:00.314	IT1	1.64033	8	6.14507
Trial 1	M1-2	C-P	M	0:05:00.314-0:05:00.580	IT1	1.33814	8	5.01302
Trial 1	M1-2	C-P	M	0:05:00.580-0:05:00.846	IT1	0.787183	8	2.94897
Trial 1	M1-2	C-P	M	0:05:00.846-0:05:01.112	IT1	0.309239	8	1.15848
Trial 1	M1-2	C-P	M	0:05:01.112-0:05:01.378	IT1	0.786137	8	2.94506
Trial 1	M1-2	C-P	M	0:05:01.378-0:05:01.644	IT1	2.45097	8	9.18194
Trial 1	M1-2	C-P	M	0:05:01.644-0:05:01.910	IT1	1.38705	8	5.19623
Trial 1	M1-2	C-P	M	0:05:01.910-0:05:02.176	IT1	1.94107	8	7.27172
Trial 1	M1-2	C-P	M	0:05:02.176-0:05:02.442	IT1	2.45375	8	9.19239
Trial 1	M1-2	C-P	M	0:05:02.442-0:05:02.708	IT1	1.7452	8	6.53793
Trial 1	M1-2	C-P	M	0:05:02.708-0:05:02.974	IT1	0.965874	8	3.61841
Trial 1	M1-2	C-P	M	0:05:02.974-0:05:03.240	IT1	1.90922	8	7.15243
Trial 1	M1-2	C-P	M	0:05:03.240-0:05:03.506	IT1	1.58473	8	5.93677
Trial 1	M1-2	C-P	M	0:05:03.506-0:05:03.772	IT1	1.92675	8	7.21811
Trial 1	M1-2	C-P	M	0:05:03.772-0:05:04.038	IT1	4.28639	8	16.0579
Trial 1	M1-2	C-P	M	0:05:04.038-0:05:04.304	IT1	5.69888	7	24.3993
Trial 1	M1-2	C-P	M	0:05:04.304-0:05:04.570	IT1	3.32604	8	12.4602
Trial 1	M1-2	C-P	M	0:05:04.570-0:05:04.836	IT1	0.890936	8	3.33766
Trial 1	M1-2	C-P	M	0:05:04.836-0:05:05.102	IT1	0.872468	8	3.26846
Trial 1	M1-2	C-P	M	0:05:05.102-0:05:05.368	IT1	1.20113	8	4.49973
Trial 1	M1-2	C-P	M	0:05:05.368-0:05:05.634	IT1	0.496329	8	1.85937
Trial 1	M1-2	C-P	M	0:05:05.634-0:05:05.900	IT1	0.629245	8	2.35732
Trial 1	M1-2	C-P	M	0:05:05.900-0:05:06.166	IT1	1.62431	8	6.08506
Trial 1	M1-2	C-P	M	0:05:06.166-0:05:06.432	IT1	1.33754	8	5.01077
Trial 1	M1-2	C-P	M	0:05:06.432-0:05:06.698	IT1	1.2424	8	4.65435
Trial 1	M1-2	C-P	M	0:05:06.698-0:05:06.964	IT1	0.567429	8	2.12574
Trial 1	M1-2	C-P	M	0:05:06.964-0:05:07.230	IT1	2.3357	8	8.75013
Trial 1	M1-2	C-P	M	0:05:07.230-0:05:07.496	IT1	1.23463	8	4.62523
Trial 1	M1-2	C-P	M	0:05:07.496-0:05:07.762	IT1	1.12036	8	4.19715
Trial 1	M1-2	C-P	M	0:05:07.762-0:05:08.028	IT1	1.43365	8	5.3708
Trial 1	M1-2	C-P	M	0:05:08.028-0:05:08.294	IT1	0.532657	8	1.99546
Trial 1	M1-2	C-P	M	0:05:08.294-0:05:08.560	IT1	0.795469	8	2.98005
Trial 1	M1-2	C-P	M	0:05:08.560-0:05:08.826	IT1	0.536322	8	2.0092
Trial 1	M1-2	C-P	M	0:05:08.826-0:05:09.092	IT1	0.0618849	8	0.231836
Trial 1	M1-2	C-P	M	0:05:09.092-0:05:09.358	IT1	0.0618849	8	0.231837
Trial 1	M1-2	C-P	M	0:05:09.358-0:05:09.624	IT1	0.0618849	8	0.231836
Trial 1	M1-2	C-P	M	0:05:09.624-0:05:09.890	IT1	0.0618849	8	0.231837
Trial 1	M1-2	C-P	M	0:05:09.890-0:05:10.156	IT1	0.0618849	8	0.231836
Trial 1	M1-2	C-P	M	0:05:10.156-0:05:10.422	IT1	0.0618849	8	0.231836
Trial 1	M1-2	C-P	M	0:05:10.422-0:05:10.688	IT1	0.0618849	8	0.231837
Trial 1	M1-2	C-P	M	0:05:10.688-0:05:10.954	IT1	0.0618849	8	0.231836
Trial 1	M1-2	C-P	M	0:05:10.954-0:05:11.220	IT1	0.0618849	8	0.231837
Trial 1	M1-2	C-P	M	0:05:11.220-0:05:11.486	IT1	0.0618849	8	0.231836
Trial 1	M1-2	C-P	M	0:05:11.486-0:05:11.752	IT1	0.0618849	8	0.231836
Trial 1	M1-2	C-P	M	0:05:11.752-0:05:12.018	IT1	0.0618849	8	0.231837
Trial 1	M1-2	C-P	M	0:05:12.018-0:05:12.284	IT1	0.0618849	8	0.231836
Trial 1	M1-2	C-P	M	0:05:12.284-0:05:12.550	IT1	0.0618849	8	0.231837
Trial 1	M1-2	C-P	M	0:05:12.550-0:05:12.816	IT1	0.0618849	8	0.231836
Trial 1	M1-2	C-P	M	0:05:12.816-0:05:13.082	IT1	0.0618849	8	0.231836
Trial 1	M1-2	C-P	M	0:05:13.082-0:05:13.348	IT1	0.0618849	8	0.231837
Trial 1	M1-2	C-P	M	0:05:13.348-0:05:13.614	IT1	0.0618849	8	0.231836
Trial 1	M1-2	C-P	M	0:05:13.614-0:05:13.880	IT1	0.0541493	7	0.231836
Trial 1	M1-2	C-P	M	0:05:13.880-0:05:14.146	IT1	0.0618849	8	0.231837
Trial 1	M1-2	C-P	M	0:05:14.146-0:05:14.412	IT1	0.0618849	8	0.231836
Trial 1	M1-2	C-P	M	0:05:14.412-0:05:14.678	IT1	0.0618849	8	0.231836
Trial 1	M1-2	C-P	M	0:05:14.678-0:05:14.944	IT1	0.0618849	8	0.231837
Trial 1	M1-2	C-P	M	0:05:14.944-0:05:15.210	IT1	0.0618849	8	0.231836
Trial 1	M1-2	C-P	M	0:05:15.210-0:05:15.476	IT1	0.0618849	8	0.231837
Trial 1	M1-2	C-P	M	0:05:15.476-0:05:15.742	IT1	0.0618849	8	0.231836
Trial 1	M1-2	C-P	M	0:05:15.742-0:05:16.008	IT1	0.0618849	8	0.231836
Trial 1	M1-2	C-P	M	0:05:16.008-0:05:16.274	IT1	0.0618849	8	0.231837
Trial 1	M1-2	C-P	M	0:05:16.274-0:05:16.540	IT1	0.0618849	8	0.231836
Trial 1	M1-2	C-P	M	0:05:16.540-0:05:16.806	IT1	0.713716	8	2.67381
Trial 1	M1-2	C-P	M	0:05:16.806-0:05:17.072	IT1	3.02294	8	11.3246
Trial 1	M1-2	C-P	M	0:05:17.072-0:05:17.338	IT1	2.84969	8	10.6757
Trial 1	M1-2	C-P	M	0:05:17.338-0:05:17.604	IT1	0.96698	8	3.62256
Trial 1	M1-2	C-P	M	0:05:17.604-0:05:17.870	IT1	2.22379	8	8.33085
Trial 1	M1-2	C-P	M	0:05:17.870-0:05:18.136	IT1	1.33909	8	5.01661
Trial 1	M1-2	C-P	M	0:05:18.136-0:05:18.402	IT1	2.67508	8	10.0215
Trial 1	M1-2	C-P	M	0:05:18.402-0:05:18.668	IT1	0.339655	8	1.27243
Trial 1	M1-2	C-P	M	0:05:18.668-0:05:18.934	IT1	0.250572	8	0.93871
Trial 1	M1-2	C-P	M	0:05:18.934-0:05:19.200	IT1	0.300047	8	1.12404
Trial 1	M1-2	C-P	M	0:05:19.200-0:05:19.466	IT1	0.299372	8	1.12153
Trial 1	M1-2	C-P	M	0:05:19.466-0:05:19.732	IT1	0.921037	8	3.45043
Trial 1	M1-2	C-P	M	0:05:19.732-0:05:19.998	IT1	0.451354	8	1.69088
Trial 1	M1-2	C-P	M	0:05:19.998-0:05:20.264	IT1	0.47997	8	1.79809
Trial 1	M1-2	C-P	M	0:05:20.264-0:05:20.530	IT1	0.161464	8	0.604885
Trial 1	M1-2	C-P	M	0:05:20.530-0:05:20.796	IT1	0.235848	8	0.883547
Trial 1	M1-2	C-P	M	0:05:20.796-0:05:21.062	IT1	0.13685	8	0.512673
Trial 1	M1-2	C-P	M	0:05:21.062-0:05:21.328	IT1	0.405777	8	1.52014
Trial 1	M1-2	C-P	M	0:05:21.328-0:05:21.594	IT1	0.296492	8	1.11073
Trial 1	M1-2	C-P	M	0:05:21.594-0:05:21.860	IT1	0.606816	8	2.27328
Trial 1	M1-2	C-P	M	0:05:21.860-0:05:22.126	IT1	0.806914	8	3.02292
Trial 1	M1-2	C-P	M	0:05:22.126-0:05:22.392	IT1	0.685608	8	2.56846
Trial 1	M1-2	C-P	M	0:05:22.392-0:05:22.658	IT1	0.72503	8	2.71614
Trial 1	M1-2	C-P	M	0:05:22.658-0:05:22.924	IT1	0.447547	8	1.67663
Trial 1	M1-2	C-P	M	0:05:22.924-0:05:23.190	IT1	0.814517	8	3.05139
Trial 1	M1-2	C-P	M	0:05:23.190-0:05:23.456	IT1	0.225178	7	0.964088
Trial 1	M1-2	C-P	M	0:05:23.456-0:05:23.722	IT1	0.0655648	8	0.245624
Trial 1	M1-2	C-P	M	0:05:23.722-0:05:23.988	IT1	0.550794	8	2.0634
Trial 1	M1-2	C-P	M	0:05:23.988-0:05:24.254	IT1	2.43515	8	9.12266
Trial 1	M1-2	C-P	M	0:05:24.254-0:05:24.520	IT1	0.462712	8	1.73342
Trial 1	M1-2	C-P	M	0:05:24.520-0:05:24.786	IT1	0.836078	8	3.13215
Trial 1	M1-2	C-P	M	0:05:24.786-0:05:25.052	IT1	3.50153	8	13.1176
Trial 1	M1-2	C-P	M	0:05:25.052-0:05:25.318	IT1	3.66126	8	13.716
Trial 1	M1-2	C-P	M	0:05:25.318-0:05:25.584	IT1	2.70904	8	10.1487
Trial 1	M1-2	C-P	M	0:05:25.584-0:05:25.850	IT1	0.930648	8	3.48643
Trial 1	M1-2	C-P	M	0:05:25.850-0:05:26.116	IT1	0.57186	8	2.14233
Trial 1	M1-2	C-P	M	0:05:26.116-0:05:26.382	IT1	1.26182	8	4.72712
Trial 1	M1-2	C-P	M	0:05:26.382-0:05:26.648	IT1	1.28614	8	4.81822
Trial 1	M1-2	C-P	M	0:05:26.648-0:05:26.914	IT1	1.01812	8	3.81414
Trial 1	M1-2	C-P	M	0:05:26.914-0:05:27.180	IT1	1.28763	8	4.8238
Trial 1	M1-2	C-P	M	0:05:27.180-0:05:27.446	IT1	1.37339	8	5.14505
Trial 1	M1-2	C-P	M	0:05:27.446-0:05:27.712	IT1	0.455836	8	1.70769
Trial 1	M1-2	C-P	M	0:05:27.712-0:05:27.978	IT1	0.668317	8	2.50368
Trial 1	M1-2	C-P	M	0:05:27.978-0:05:28.244	IT1	1.44375	8	5.40865
Trial 1	M1-2	C-P	M	0:05:28.244-0:05:28.510	IT1	1.59611	8	5.97941
Trial 1	M1-2	C-P	M	0:05:28.510-0:05:28.776	IT1	0.604341	8	2.26401
Trial 1	M1-2	C-P	M	0:05:28.776-0:05:29.042	IT1	0.315425	8	1.18166
Trial 1	M1-2	C-P	M	0:05:29.042-0:05:29.308	IT1	0.911548	8	3.41488
Trial 1	M1-2	C-P	M	0:05:29.308-0:05:29.574	IT1	1.11083	8	4.16145
Trial 1	M1-2	C-P	M	0:05:29.574-0:05:29.840	IT1	1.16519	8	4.36511
Trial 1	M1-2	C-P	M	0:05:29.840-0:05:30.106	IT1	1.16759	8	4.37408
Trial 1	M1-2	C-P	M	0:05:30.106-0:05:30.372	IT1	1.5058	8	5.64107
Trial 1	M1-2	C-P	M	0:05:30.372-0:05:30.638	IT1	0.872422	8	3.2683
Trial 1	M1-2	C-P	M	0:05:30.638-0:05:30.904	IT1	2.50191	8	9.3728
Trial 1	M1-2	C-P	M	0:05:30.904-0:05:31.170	IT1	0.833461	8	3.12235
Trial 1	M1-2	C-P	M	0:05:31.170-0:05:31.436	IT1	1.28454	8	4.81218
Trial 1	M1-2	C-P	M	0:05:31.436-0:05:31.702	IT1	1.88965	8	7.07913
Trial 1	M1-2	C-P	M	0:05:31.702-0:05:31.968	IT1	4.91281	8	18.4047
Trial 1	M1-2	C-P	M	0:05:31.968-0:05:32.234	IT1	2.04734	8	7.66981
Trial 1	M1-2	C-P	M	0:05:32.234-0:05:32.500	IT1	2.31231	8	8.66247
Trial 1	M1-2	C-P	M	0:05:32.500-0:05:32.766	IT1	2.81274	7	12.0426
Trial 1	M1-2	C-P	M	0:05:32.766-0:05:33.032	IT1	6.4653	8	24.2208
Trial 1	M1-2	C-P	M	0:05:33.032-0:05:33.298	IT1	2.64463	8	9.90753
Trial 1	M1-2	C-P	M	0:05:33.298-0:05:33.564	IT1	1.65069	8	6.18386
Trial 1	M1-2	C-P	M	0:05:33.564-0:05:33.830	IT1	2.60281	8	9.75076
Trial 1	M1-2	C-P	M	0:05:33.830-0:05:34.096	IT1	2.81202	8	10.5345
Trial 1	M1-2	C-P	M	0:05:34.096-0:05:34.362	IT1	1.9291	8	7.22684
Trial 1	M1-2	C-P	M	0:05:34.362-0:05:34.628	IT1	1.29863	8	4.86499
Trial 1	M1-2	C-P	M	0:05:34.628-0:05:34.894	IT1	1.75272	8	6.5661
Trial 1	M1-2	C-P	M	0:05:34.894-0:05:35.160	IT1	0.681346	8	2.55251
Trial 1	M1-2	C-P	M	0:05:35.160-0:05:35.426	IT1	1.04295	8	3.90714
Trial 1	M1-2	C-P	M	0:05:35.426-0:05:35.692	IT1	1.16401	8	4.36065
Trial 1	M1-2	C-P	M	0:05:35.692-0:05:35.958	IT1	1.10853	8	4.15283
Trial 1	M1-2	C-P	M	0:05:35.958-0:05:36.224	IT1	1.6862	8	6.31692
Trial 1	M1-2	C-P	M	0:05:36.224-0:05:36.490	IT1	1.84772	8	6.922
Trial 1	M1-2	C-P	M	0:05:36.490-0:05:36.756	IT1	2.27536	8	8.52403
Trial 1	M1-2	C-P	M	0:05:36.756-0:05:37.022	IT1	4.9873	8	18.6836
Trial 1	M1-2	C-P	M	0:05:37.022-0:05:37.288	IT1	1.06924	8	4.00564
Trial 1	M1-2	C-P	M	0:05:37.288-0:05:37.554	IT1	0.843667	8	3.16057
Trial 1	M1-2	C-P	M	0:05:37.554-0:05:37.820	IT1	1.25605	8	4.7055
Trial 1	M1-2	C-P	M	0:05:37.820-0:05:38.086	IT1	1.11473	8	4.17606
Trial 1	M1-2	C-P	M	0:05:38.086-0:05:38.352	IT1	0.739124	8	2.76895
Trial 1	M1-2	C-P	M	0:05:38.352-0:05:38.618	IT1	0.439889	8	1.64794
Trial 1	M1-2	C-P	M	0:05:38.618-0:05:38.884	IT1	1.01418	8	3.79938
Trial 1	M1-2	C-P	M	0:05:38.884-0:05:39.150	IT1	0.647623	8	2.42615
Trial 1	M1-2	C-P	M	0:05:39.150-0:05:39.416	IT1	0.281712	8	1.05537
Trial 1	M1-2	C-P	M	0:05:39.416-0:05:39.682	IT1	0.121972	8	0.456934
Trial 1	M1-2	C-P	M	0:05:39.682-0:05:39.948	IT1	0.416336	8	1.5597
Trial 1	M1-2	C-P	M	0:05:39.948-0:05:40.214	IT1	1.20351	8	4.50864
Trial 1	M1-2	C-P	M	0:05:40.214-0:05:40.480	IT1	2.24644	8	8.41575
Trial 1	M1-2	C-P	M	0:05:40.480-0:05:40.746	IT1	2.4365	8	9.12771
Trial 1	M1-2	C-P	M	0:05:40.746-0:05:41.012	IT1	3.47525	8	13.0191
Trial 1	M1-2	C-P	M	0:05:41.012-0:05:41.278	IT1	5.43427	8	20.3582
Trial 1	M1-2	C-P	M	0:05:41.278-0:05:41.544	IT1	3.51245	8	13.1585
Trial 1	M1-2	C-P	M	0:05:41.544-0:05:41.810	IT1	1.97249	8	7.38946
Trial 1	M1-2	C-P	M	0:05:41.810-0:05:42.076	IT1	0.574759	8	2.15319
Trial 1	M1-2	C-P	M	0:05:42.076-0:05:42.342	IT1	0.933837	7	3.99816
Trial 1	M1-2	C-P	M	0:05:42.342-0:05:42.608	IT1	1.45992	8	5.46926
Trial 1	M1-2	C-P	M	0:05:42.608-0:05:42.874	IT1	1.07781	8	4.03772
Trial 1	M1-2	C-P	M	0:05:42.874-0:05:43.140	IT1	1.439	8	5.39088
Trial 1	M1-2	C-P	M	0:05:43.140-0:05:43.406	IT1	0.409162	8	1.53284
Trial 1	M1-2	C-P	M	0:05:43.406-0:05:43.672	IT1	0.448951	8	1.68188
Trial 1	M1-2	C-P	M	0:05:43.672-0:05:43.938	IT1	0.27153	8	1.01722
Trial 1	M1-2	C-P	M	0:05:43.938-0:05:44.204	IT1	0.294232	8	1.10226
Trial 1	M1-2	C-P	M	0:05:44.204-0:05:44.470	IT1	0.374936	8	1.4046
Trial 1	M1-2	C-P	M	0:05:44.470-0:05:44.736	IT1	0.220397	8	0.825665
Trial 1	M1-2	C-P	M	0:05:44.736-0:05:45.002	IT1	0.443312	8	1.66075
Trial 1	M1-2	C-P	M	0:05:45.002-0:05:45.268	IT1	0.928102	8	3.47691
Trial 1	M1-2	C-P	M	0:05:45.268-0:05:45.534	IT1	0.863674	8	3.23552
Trial 1	M1-2	C-P	M	0:05:45.534-0:05:45.800	IT1	0.871449	8	3.26466
Trial 1	M1-2	C-P	M	0:05:45.800-0:05:46.066	IT1	1.65922	8	6.21588
Trial 1	M1-2	C-P	M	0:05:46.066-0:05:46.332	IT1	0.729622	8	2.73335
Trial 1	M1-2	C-P	M	0:05:46.332-0:05:46.598	IT1	0.236753	8	0.88693
Trial 1	M1-2	C-P	M	0:05:46.598-0:05:46.864	IT1	1.2169	8	4.55883
Trial 1	M1-2	C-P	M	0:05:46.864-0:05:47.130	IT1	1.61852	8	6.06337
Trial 1	M1-2	C-P	M	0:05:47.130-0:05:47.396	IT1	0.758364	8	2.84103
Trial 1	M1-2	C-P	M	0:05:47.396-0:05:47.662	IT1	0.432167	8	1.619
Trial 1	M1-2	C-P	M	0:05:47.662-0:05:47.928	IT1	1.80855	8	6.77526
Trial 1	M1-2	C-P	M	0:05:47.928-0:05:48.194	IT1	0.628991	8	2.35635
Trial 1	M1-2	C-P	M	0:05:48.194-0:05:48.460	IT1	0.441205	8	1.65287
Trial 1	M1-2	C-P	M	0:05:48.460-0:05:48.726	IT1	0.695799	8	2.60664
Trial 1	M1-2	C-P	M	0:05:48.726-0:05:48.992	IT1	0.303055	8	1.13531
Trial 1	M1-2	C-P	M	0:05:48.992-0:05:49.258	IT1	0.54328	8	2.03527
Trial 1	M1-2	C-P	M	0:05:49.258-0:05:49.524	IT1	0.519027	8	1.94441
Trial 1	M1-2	C-P	M	0:05:49.524-0:05:49.790	IT1	0.467186	8	1.75019
Trial 1	M1-2	C-P	M	0:05:49.790-0:05:50.056	IT1	0.531722	8	1.99198
Trial 1	M1-2	C-P	M	0:05:50.056-0:05:50.322	IT1	0.399414	8	1.49632
Trial 1	M1-2	C-P	M	0:05:50.322-0:05:50.588	IT1	0.105383	8	0.394789
Trial 1	M1-2	C-P	M	0:05:50.588-0:05:50.854	IT1	0.159864	8	0.598887
Trial 1	M1-2	C-P	M	0:05:50.854-0:05:51.120	IT1	0.0856473	8	0.320853
Trial 1	M1-2	C-P	M	0:05:51.120-0:05:51.386	IT1	0.286764	8	1.07429
Trial 1	M1-2	C-P	M	0:05:51.386-0:05:51.652	IT1	0.542062	8	2.0307
Trial 1	M1-2	C-P	M	0:05:51.652-0:05:51.918	IT1	0.721387	7	3.08856
Trial 1	M1-2	C-P	M	0:05:51.918-0:05:52.184	IT1	0.488196	8	1.82892
Trial 1	M1-2	C-P	M	0:05:52.184-0:05:52.450	IT1	0.57281	8	2.14589
Trial 1	M1-2	C-P	M	0:05:52.450-0:05:52.716	IT1	0.569311	8	2.13278
Trial 1	M1-2	C-P	M	0:05:52.716-0:05:52.982	IT1	1.00661	8	3.77101
Trial 1	M1-2	C-P	M	0:05:52.982-0:05:53.248	IT1	0.506894	8	1.89896
Trial 1	M1-2	C-P	M	0:05:53.248-0:05:53.514	IT1	0.563653	8	2.11159
Trial 1	M1-2	C-P	M	0:05:53.514-0:05:53.780	IT1	0.482104	8	1.80608
Trial 1	M1-2	C-P	M	0:05:53.780-0:05:54.046	IT1	0.284583	8	1.06611
Trial 1	M1-2	C-P	M	0:05:54.046-0:05:54.312	IT1	0.277812	8	1.04076
Trial 1	M1-2	C-P	M	0:05:54.312-0:05:54.578	IT1	0.209991	8	0.786676
Trial 1	M1-2	C-P	M	0:05:54.578-0:05:54.844	IT1	0.756638	8	2.83455
Trial 1	M1-2	C-P	M	0:05:54.844-0:05:55.110	IT1	1.03134	8	3.86366
Trial 1	M1-2	C-P	M	0:05:55.110-0:05:55.376	IT1	0.727747	8	2.72632
Trial 1	M1-2	C-P	M	0:05:55.376-0:05:55.642	IT1	0.221571	8	0.830055
Trial 1	M1-2	C-P	M	0:05:55.642-0:05:55.908	IT1	0.222313	8	0.832846
Trial 1	M1-2	C-P	M	0:05:55.908-0:05:56.174	IT1	0.0953878	8	0.357349
Trial 1	M1-2	C-P	M	0:05:56.174-0:05:56.440	IT1	0.0514551	8	0.192763
Trial 1	M1-2	C-P	M	0:05:56.440-0:05:56.706	IT1	0.0589893	8	0.220987
Trial 1	M1-2	C-P	M	0:05:56.706-0:05:56.972	IT1	1.12638	8	4.21969
Trial 1	M1-2	C-P	M	0:05:56.972-0:05:57.238	IT1	0.757089	8	2.83624
Trial 1	M1-2	C-P	M	0:05:57.238-0:05:57.504	IT1	1.27872	8	4.79042
Trial 1	M1-2	C-P	M	0:05:57.504-0:05:57.770	IT1	1.20064	8	4.4979
Trial 1	M1-2	C-P	M	0:05:57.770-0:05:58.036	IT1	0.756194	8	2.83289
Trial 1	M1-2	C-P	M	0:05:58.036-0:05:58.302	IT1	1.33661	8	5.00728
Trial 1	M1-2	C-P	M	0:05:58.302-0:05:58.568	IT1	2.2431	8	8.40318
Trial 1	M1-2	C-P	M	0:05:58.568-0:05:58.834	IT1	0.773904	8	2.89926
Trial 1	M1-2	C-P	M	0:05:58.834-0:05:59.100	IT1	0.429986	8	1.61083
Trial 1	M1-2	C-P	M	0:05:59.100-0:05:59.366	IT1	0.194192	8	0.727494
Trial 1	M1-2	C-P	M	0:05:59.366-0:05:59.632	IT1	0.252729	8	0.946788
Trial 1	M1-2	C-P	M	0:05:59.632-0:05:59.898	IT1	1.54904	8	5.80309
Trial 1	M1-2	C-P	M	0:05:59.898-0:06:00.164	IT1	0.814953	8	3.05301
Trial 1	M1-2	C-P	M	0:06:00.164-0:06:00.430	IT1	0.569353	8	2.13294
Trial 1	M1-2	C-P	M	0:06:00.430-0:06:00.696	IT1	0.564594	8	2.1151
Trial 1	M1-2	C-P	M	0:06:00.696-0:06:00.962	IT1	0.502306	8	1.88177
Trial 1	M1-2	C-P	M	0:06:00.962-0:06:01.228	IT1	0.34033	8	1.27496
Trial 1	M1-2	C-P	M	0:06:01.228-0:06:01.494	IT1	0.308089	7	1.31906
Trial 1	M1-2	C-P	M	0:06:01.494-0:06:01.760	IT1	0.221956	8	0.831503
Trial 1	M1-2	C-P	M	0:06:01.760-0:06:02.026	IT1	0.121564	8	0.455412
Trial 1	M1-2	C-P	M	0:06:02.026-0:06:02.292	IT1	0.0486303	8	0.182183
Trial 1	M1-2	C-P	M	0:06:02.292-0:06:02.558	IT1	0.0957576	8	0.358729
Trial 1	M1-2	C-P	M	0:06:02.558-0:06:02.824	IT1	0.465996	8	1.74573
Trial 1	M1-2	C-P	M	0:06:02.824-0:06:03.090	IT1	0.468939	8	1.75676
Trial 1	M1-2	C-P	M	0:06:03.090-0:06:03.356	IT1	0.336602	8	1.26099
Trial 1	M1-2	C-P	M	0:06:03.356-0:06:03.622	IT1	0.136126	8	0.509964
Trial 1	M1-2	C-P	M	0:06:03.622-0:06:03.888	IT1	0.0425083	8	0.159246
Trial 1	M1-2	C-P	M	0:06:03.888-0:06:04.154	IT1	0.216847	8	0.812354
Trial 1	M1-2	C-P	M	0:06:04.154-0:06:04.420	IT1	0.354773	8	1.32907
Trial 1	M1-2	C-P	M	0:06:04.420-0:06:04.686	IT1	0.988773	8	3.70417
Trial 1	M1-2	C-P	M	0:06:04.686-0:06:04.952	IT1	0.835932	8	3.13162
Trial 1	M1-2	C-P	M	0:06:04.952-0:06:05.218	IT1	0.402123	8	1.50645
Trial 1	M1-2	C-P	M	0:06:05.218-0:06:05.484	IT1	0.492796	8	1.84613
Trial 1	M1-2	C-P	M	0:06:05.484-0:06:05.750	IT1	1.252	8	4.69033
Trial 1	M1-2	C-P	M	0:06:05.750-0:06:06.016	IT1	2.50238	8	9.37451
Trial 1	M1-2	C-P	M	0:06:06.016-0:06:06.282	IT1	4.0289	8	15.0933
Trial 1	M1-2	C-P	M	0:06:06.282-0:06:06.548	IT1	2.9211	8	10.9431
Trial 1	M1-2	C-P	M	0:06:06.548-0:06:06.814	IT1	3.63067	8	13.6014
Trial 1	M1-2	C-P	M	0:06:06.814-0:06:07.080	IT1	2.65786	8	9.95701
Trial 1	M1-2	C-P	M	0:06:07.080-0:06:07.346	IT1	3.04962	8	11.4247
Trial 1	M1-2	C-P	M	0:06:07.346-0:06:07.612	IT1	0.964166	8	3.61201
Trial 1	M1-2	C-P	M	0:06:07.612-0:06:07.878	IT1	0.356213	8	1.33446
Trial 1	M1-2	C-P	M	0:06:07.878-0:06:08.144	IT1	1.24122	8	4.64993
Trial 1	M1-2	C-P	M	0:06:08.144-0:06:08.410	IT1	1.14445	8	4.28739
Trial 1	M1-2	C-P	M	0:06:08.410-0:06:08.676	IT1	1.00415	8	3.76179
Trial 1	M1-2	C-P	M	0:06:08.676-0:06:08.942	IT1	1.25837	8	4.71416
Trial 1	M1-2	C-P	M	0:06:08.942-0:06:09.208	IT1	1.39848	8	5.23903
Trial 1	M1-2	C-P	M	0:06:09.208-0:06:09.474	IT1	0.713066	8	2.67132
Trial 1	M1-2	C-P	M	0:06:09.474-0:06:09.740	IT1	0.426542	8	1.59794
Trial 1	M1-2	C-P	M	0:06:09.740-0:06:10.006	IT1	1.51228	8	5.66537
Trial 1	M1-2	C-P	M	0:06:10.006-0:06:10.272	IT1	0.671553	8	2.51581
Trial 1	M1-2	C-P	M	0:06:10.272-0:06:10.538	IT1	0.842622	8	3.15666
Trial 1	M1-2	C-P	M	0:06:10.538-0:06:10.804	IT1	1.3843	7	5.92678
Trial 1	M1-2	C-P	M	0:06:10.804-0:06:11.070	IT1	0.560841	8	2.10105
Trial 1	M1-2	C-P	M	0:06:11.070-0:06:11.336	IT1	0.299448	8	1.12181
Trial 1	M1-2	C-P	M	0:06:11.336-0:06:11.602	IT1	0.0331312	8	0.124117
Trial 1	M1-2	C-P	M	0:06:11.602-0:06:11.868	IT1	0.0589255	8	0.220753
Trial 1	M1-2	C-P	M	0:06:11.868-0:06:12.134	IT1	0.316354	8	1.18514
Trial 1	M1-2	C-P	M	0:06:12.134-0:06:12.400	IT1	0.811227	8	3.03906
Trial 1	M1-2	C-P	M	0:06:12.400-0:06:12.666	IT1	0.303457	8	1.13683
Trial 1	M1-2	C-P	M	0:06:12.666-0:06:12.932	IT1	0.323282	8	1.21109
Trial 1	M1-2	C-P	M	0:06:12.932-0:06:13.198	IT1	1.3724	8	5.14137
Trial 1	M1-2	C-P	M	0:06:13.198-0:06:13.464	IT1	0.886166	8	3.31978
Trial 1	M1-2	C-P	M	0:06:13.464-0:06:13.730	IT1	0.534152	8	2.00106
Trial 1	M1-2	C-P	M	0:06:13.730-0:06:13.996	IT1	0.159647	8	0.598074
Trial 1	M1-2	C-P	M	0:06:13.996-0:06:14.262	IT1	0.198659	8	0.744223
Trial 1	M1-2	C-P	M	0:06:14.262-0:06:14.528	IT1	0.882311	8	3.30536
Trial 1	M1-2	C-P	M	0:06:14.528-0:06:14.794	IT1	1.11252	8	4.16776
Trial 1	M1-2	C-P	M	0:06:14.794-0:06:15.060	IT1	2.21386	8	8.29367
Trial 1	M1-2	C-P	M	0:06:15.060-0:06:15.326	IT1	3.10348	8	11.6264
Trial 1	M1-2	C-P	M	0:06:15.326-0:06:15.592	IT1	3.40161	8	12.7432
Trial 1	M1-2	C-P	M	0:06:15.592-0:06:15.858	IT1	1.78039	8	6.66981
Trial 1	M1-2	C-P	M	0:06:15.858-0:06:16.124	IT1	2.70821	8	10.1456
Trial 1	M1-2	C-P	M	0:06:16.124-0:06:16.390	IT1	1.54453	8	5.78619
Trial 1	M1-2	C-P	M	0:06:16.390-0:06:16.656	IT1	3.23011	8	12.1008
Trial 1	M1-2	C-P	M	0:06:16.656-0:06:16.922	IT1	3.94914	8	14.7944
Trial 1	M1-2	C-P	M	0:06:16.922-0:06:17.188	IT1	3.40193	8	12.7445
Trial 1	M1-2	C-P	M	0:06:17.188-0:06:17.454	IT1	1.24848	8	4.67711
Trial 1	M1-2	C-P	M	0:06:17.454-0:06:17.720	IT1	1.37424	8	5.14827
Trial 1	M1-2	C-P	M	0:06:17.720-0:06:17.986	IT1	0.591055	8	2.21425
Trial 1	M1-2	C-P	M	0:06:17.986-0:06:18.252	IT1	1.07236	8	4.01732
Trial 1	M1-2	C-P	M	0:06:18.252-0:06:18.518	IT1	1.092	8	4.09091
Trial 1	M1-2	C-P	M	0:06:18.518-0:06:18.784	IT1	0.223329	8	0.836645
Trial 1	M1-2	C-P	M	0:06:18.784-0:06:19.050	IT1	0.286974	8	1.07508
Trial 1	M1-2	C-P	M	0:06:19.050-0:06:19.316	IT1	0.193017	8	0.723092
Trial 1	M1-2	C-P	M	0:06:19.316-0:06:19.582	IT1	0.193017	8	0.723089
Trial 1	M1-2	C-P	M	0:06:19.582-0:06:19.848	IT1	0.193017	8	0.723092
Trial 1	M1-2	C-P	M	0:06:19.848-0:06:20.114	IT1	0.193017	8	0.723089
Trial 1	M1-2	C-P	M	0:06:20.114-0:06:20.380	IT1	0.16889	7	0.72309
Trial 1	M1-2	C-P	M	0:06:20.380-0:06:20.646	IT1	0.193017	8	0.723092
Trial 1	M1-2	C-P	M	0:06:20.646-0:06:20.912	IT1	0.193017	8	0.723089
Trial 1	M1-2	C-P	M	0:06:20.912-0:06:21.178	IT1	0.193017	8	0.723089
Trial 1	M1-2	C-P	M	0:06:21.178-0:06:21.444	IT1	0.193017	8	0.723092
Trial 1	M1-2	C-P	M	0:06:21.444-0:06:21.710	IT1	0.193017	8	0.723089
Trial 1	M1-2	C-P	M	0:06:21.710-0:06:21.976	IT1	0.193017	8	0.723092
Trial 1	M1-2	C-P	M	0:06:21.976-0:06:22.242	IT1	0.193017	8	0.723089
Trial 1	M1-2	C-P	M	0:06:22.242-0:06:22.508	IT1	0.193017	8	0.723089
Trial 1	M1-2	C-P	M	0:06:22.508-0:06:22.774	IT1	0.193017	8	0.723092
Trial 1	M1-2	C-P	M	0:06:22.774-0:06:23.040	IT1	0.372059	8	1.39382
Trial 1	M1-2	C-P	M	0:06:23.040-0:06:23.306	IT1	1.00838	8	3.77768
Trial 1	M1-2	C-P	M	0:06:23.306-0:06:23.572	IT1	0.552228	8	2.06878
Trial 1	M1-2	C-P	M	0:06:23.572-0:06:23.838	IT1	0.932815	8	3.49457
Trial 1	M1-2	C-P	M	0:06:23.838-0:06:24.104	IT1	0.25724	8	0.963687
Trial 1	M1-2	C-P	M	0:06:24.104-0:06:24.370	IT1	0.25724	8	0.963684
Trial 1	M1-2	C-P	M	0:06:24.370-0:06:24.636	IT1	0.25724	8	0.963687
Trial 1	M1-2	C-P	M	0:06:24.636-0:06:24.902	IT1	0.25724	8	0.963684
Trial 1	M1-2	C-P	M	0:06:24.902-0:06:25.168	IT1	0.25724	8	0.963684
Trial 1	M1-2	C-P	M	0:06:25.168-0:06:25.434	IT1	0.25724	8	0.963687
Trial 1	M1-2	C-P	M	0:06:25.434-0:06:25.700	IT1	0.25724	8	0.963684
Trial 1	M1-2	C-P	M	0:06:25.700-0:06:25.966	IT1	1.40099	8	5.24845
Trial 1	M1-2	C-P	M	0:06:25.966-0:06:26.232	IT1	2.2137	8	8.29306
Trial 1	M1-2	C-P	M	0:06:26.232-0:06:26.498	IT1	1.58011	8	5.91948
Trial 1	M1-2	C-P	M	0:06:26.498-0:06:26.764	IT1	1.27493	8	4.77623
Trial 1	M1-2	C-P	M	0:06:26.764-0:06:27.030	IT1	2.42931	8	9.10077
Trial 1	M1-2	C-P	M	0:06:27.030-0:06:27.296	IT1	2.34832	8	8.79744
Trial 1	M1-2	C-P	M	0:06:27.296-0:06:27.562	IT1	3.58555	8	13.4323
Trial 1	M1-2	C-P	M	0:06:27.562-0:06:27.828	IT1	3.58646	8	13.4357
Trial 1	M1-2	C-P	M	0:06:27.828-0:06:28.094	IT1	2.26715	8	8.49335
Trial 1	M1-2	C-P	M	0:06:28.094-0:06:28.360	IT1	0.415548	8	1.55674
Trial 1	M1-2	C-P	M	0:06:28.360-0:06:28.626	IT1	0.152336	8	0.570689
Trial 1	M1-2	C-P	M	0:06:28.626-0:06:28.892	IT1	0.0537713	8	0.201441
Trial 1	M1-2	C-P	M	0:06:28.892-0:06:29.158	IT1	0.075266	8	0.281965
Trial 1	M1-2	C-P	M	0:06:29.158-0:06:29.424	IT1	0.15464	8	0.57932
Trial 1	M1-2	C-P	M	0:06:29.424-0:06:29.690	IT1	0.0501944	8	0.18804
Trial 1	M1-2	C-P	M	0:06:29.690-0:06:29.956	IT1	0.0354564	7	0.151803
Trial 1	M1-2	C-P	M	0:06:29.956-0:06:30.222	IT1	0.105947	8	0.396904
Trial 1	M1-2	C-P	M	0:06:30.222-0:06:30.488	IT1	0.130902	8	0.490388
Trial 1	M1-2	C-P	M	0:06:30.488-0:06:30.754	IT1	0.885333	8	3.31667
Trial 1	M1-2	C-P	M	0:06:30.754-0:06:31.020	IT1	2.80784	8	10.5189
Trial 1	M1-2	C-P	M	0:06:31.020-0:06:31.286	IT1	2.72691	8	10.2157
Trial 1	M1-2	C-P	M	0:06:31.286-0:06:31.552	IT1	0.78643	8	2.9462
Trial 1	M1-2	C-P	M	0:06:31.552-0:06:31.818	IT1	1.15729	8	4.33551
Trial 1	M1-2	C-P	M	0:06:31.818-0:06:32.084	IT1	0.419781	8	1.5726
Trial 1	M1-2	C-P	M	0:06:32.084-0:06:32.350	IT1	0.976266	8	3.65737
Trial 1	M1-2	C-P	M	0:06:32.350-0:06:32.616	IT1	0.868734	8	3.25448
Trial 1	M1-2	C-P	M	0:06:32.616-0:06:32.882	IT1	0.775698	8	2.90596
Trial 1	M1-2	C-P	M	0:06:32.882-0:06:33.148	IT1	0.644604	8	2.41484
Trial 1	M1-2	C-P	M	0:06:33.148-0:06:33.414	IT1	0.480228	8	1.79905
Trial 1	M1-2	C-P	M	0:06:33.414-0:06:33.680	IT1	0.475577	8	1.78163
Trial 1	M1-2	C-P	M	0:06:33.680-0:06:33.946	IT1	0.497037	8	1.86202
Trial 1	M1-2	C-P	M	0:06:33.946-0:06:34.212	IT1	0.219319	8	0.821623
Trial 1	M1-2	C-P	M	0:06:34.212-0:06:34.478	IT1	0.121145	8	0.453839
Trial 1	M1-2	C-P	M	0:06:34.478-0:06:34.744	IT1	0.139405	8	0.522246
Trial 1	M1-2	C-P	M	0:06:34.744-0:06:35.010	IT1	0.0409689	8	0.153481
Trial 1	M1-2	C-P	M	0:06:35.010-0:06:35.276	IT1	0.0517153	8	0.193738
Trial 1	M1-2	C-P	M	0:06:35.276-0:06:35.542	IT1	0.541249	8	2.02765
Trial 1	M1-2	C-P	M	0:06:35.542-0:06:35.808	IT1	0.547792	8	2.05216
Trial 1	M1-2	C-P	M	0:06:35.808-0:06:36.074	IT1	0.337927	8	1.26595
Trial 1	M1-2	C-P	M	0:06:36.074-0:06:36.340	IT1	0.305369	8	1.14398
Trial 1	M1-2	C-P	M	0:06:36.340-0:06:36.606	IT1	0.185116	8	0.693486
Trial 1	M1-2	C-P	M	0:06:36.606-0:06:36.872	IT1	0.598403	8	2.24178
Trial 1	M1-2	C-P	M	0:06:36.872-0:06:37.138	IT1	0.52777	8	1.97715
Trial 1	M1-2	C-P	M	0:06:37.138-0:06:37.404	IT1	0.521231	8	1.95265
Trial 1	M1-2	C-P	M	0:06:37.404-0:06:37.670	IT1	0.420498	8	1.57529
Trial 1	M1-2	C-P	M	0:06:37.670-0:06:37.936	IT1	0.445382	8	1.66851
Trial 1	M1-2	C-P	M	0:06:37.936-0:06:38.202	IT1	1.28648	8	4.81947
Trial 1	M1-2	C-P	M	0:06:38.202-0:06:38.468	IT1	1.85035	8	6.93188
Trial 1	M1-2	C-P	M	0:06:38.468-0:06:38.734	IT1	0.745752	8	2.79376
Trial 1	M1-2	C-P	M	0:06:38.734-0:06:39.000	IT1	0.472325	8	1.76946
Trial 1	M1-2	C-P	M	0:06:39.000-0:06:39.266	IT1	0.435263	8	1.63061
Trial 1	M1-2	C-P	M	0:06:39.266-0:06:39.532	IT1	1.49318	7	6.39294
Trial 1	M1-2	C-P	M	0:06:39.532-0:06:39.798	IT1	1.40296	8	5.25587
Trial 1	M1-2	C-P	M	0:06:39.798-0:06:40.064	IT1	1.48329	8	5.55676
Trial 1	M1-2	C-P	M	0:06:40.064-0:06:40.330	IT1	1.33846	8	5.01419
Trial 1	M1-2	C-P	M	0:06:40.330-0:06:40.596	IT1	1.88712	8	7.0696
Trial 1	M1-2	C-P	M	0:06:40.596-0:06:40.862	IT1	1.69711	8	6.35777
Trial 1	M1-2	C-P	M	0:06:40.862-0:06:41.128	IT1	1.40888	8	5.27803
Trial 1	M1-2	C-P	M	0:06:41.128-0:06:41.394	IT1	0.799599	8	2.99551
Trial 1	M1-2	C-P	M	0:06:41.394-0:06:41.660	IT1	1.08225	8	4.05438
Trial 1	M1-2	C-P	M	0:06:41.660-0:06:41.926	IT1	0.858263	8	3.21527
Trial 1	M1-2	C-P	M	0:06:41.926-0:06:42.192	IT1	0.937262	8	3.5112
Trial 1	M1-2	C-P	M	0:06:42.192-0:06:42.458	IT1	1.6674	8	6.24651
Trial 1	M1-2	C-P	M	0:06:42.458-0:06:42.724	IT1	1.48972	8	5.58086
Trial 1	M1-2	C-P	M	0:06:42.724-0:06:42.990	IT1	2.99332	8	11.2138
Trial 1	M1-2	C-P	M	0:06:42.990-0:06:43.256	IT1	2.85431	8	10.6929
Trial 1	M1-2	C-P	M	0:06:43.256-0:06:43.522	IT1	1.71355	8	6.41939
Trial 1	M1-2	C-P	M	0:06:43.522-0:06:43.788	IT1	0.360545	8	1.3507
Trial 1	M1-2	C-P	M	0:06:43.788-0:06:44.054	IT1	1.06565	8	3.99219
Trial 1	M1-2	C-P	M	0:06:44.054-0:06:44.320	IT1	1.57106	8	5.88557
Trial 1	M1-2	C-P	M	0:06:44.320-0:06:44.586	IT1	0.8688	8	3.25473
Trial 1	M1-2	C-P	M	0:06:44.586-0:06:44.852	IT1	0.986569	8	3.69596
Trial 1	M1-2	C-P	M	0:06:44.852-0:06:45.118	IT1	0.804676	8	3.01451
Trial 1	M1-2	C-P	M	0:06:45.118-0:06:45.384	IT1	2.09656	8	7.85425
Trial 1	M1-2	C-P	M	0:06:45.384-0:06:45.650	IT1	0.975502	8	3.65448
Trial 1	M1-2	C-P	M	0:06:45.650-0:06:45.916	IT1	0.327404	8	1.22654
Trial 1	M1-2	C-P	M	0:06:45.916-0:06:46.182	IT1	0.88358	8	3.3101
Trial 1	M1-2	C-P	M	0:06:46.182-0:06:46.448	IT1	0.869308	8	3.25664
Trial 1	M1-2	C-P	M	0:06:46.448-0:06:46.714	IT1	1.0364	8	3.88262
Trial 1	M1-2	C-P	M	0:06:46.714-0:06:46.980	IT1	1.58115	8	5.92341
Trial 1	M1-2	C-P	M	0:06:46.980-0:06:47.246	IT1	1.3752	8	5.15183
Trial 1	M1-2	C-P	M	0:06:47.246-0:06:47.512	IT1	0.900432	8	3.37325
Trial 1	M1-2	C-P	M	0:06:47.512-0:06:47.778	IT1	0.26223	8	0.982383
Trial 1	M1-2	C-P	M	0:06:47.778-0:06:48.044	IT1	1.67623	8	6.27957
Trial 1	M1-2	C-P	M	0:06:48.044-0:06:48.310	IT1	1.50552	8	5.64005
Trial 1	M1-2	C-P	M	0:06:48.310-0:06:48.576	IT1	1.50987	8	5.65638
Trial 1	M1-2	C-P	M	0:06:48.576-0:06:48.842	IT1	0.642574	7	2.75113
Trial 1	M1-2	C-P	M	0:06:48.842-0:06:49.108	IT1	1.0494	8	3.93132
Trial 1	M1-2	C-P	M	0:06:49.108-0:06:49.374	IT1	1.92029	8	7.19389
Trial 1	M1-2	C-P	M	0:06:49.374-0:06:49.640	IT1	1.42075	8	5.32244
Trial 1	M1-2	C-P	M	0:06:49.640-0:06:49.906	IT1	1.84349	8	6.90615
Trial 1	M1-2	C-P	M	0:06:49.906-0:06:50.172	CS2a	1.60097	8	5.99759
Trial 1	M1-2	C-P	M	0:06:50.172-0:06:50.438	CS2a	0.679191	8	2.54443
Trial 1	M1-2	C-P	M	0:06:50.438-0:06:50.704	CS2a	0.609156	8	2.28204
Trial 1	M1-2	C-P	M	0:06:50.704-0:06:50.970	CS2a	0.708044	8	2.6525
Trial 1	M1-2	C-P	M	0:06:50.970-0:06:51.236	CS2a	1.11185	8	4.16527
Trial 1	M1-2	C-P	M	0:06:51.236-0:06:51.502	CS2a	0.907914	8	3.40127
Trial 1	M1-2	C-P	M	0:06:51.502-0:06:51.768	CS2a	1.09627	8	4.10688
Trial 1	M1-2	C-P	M	0:06:51.768-0:06:52.034	CS2a	0.976852	8	3.65953
Trial 1	M1-2	C-P	M	0:06:52.034-0:06:52.300	CS2a	0.602379	8	2.25666
Trial 1	M1-2	C-P	M	0:06:52.300-0:06:52.566	CS2a	0.632326	8	2.36885
Trial 1	M1-2	C-P	M	0:06:52.566-0:06:52.832	CS2a	0.688128	8	2.5779
Trial 1	M1-2	C-P	M	0:06:52.832-0:06:53.098	CS2a	0.688128	8	2.5779
Trial 1	M1-2	C-P	M	0:06:53.098-0:06:53.364	CS2a	0.688128	8	2.5779
Trial 1	M1-2	C-P	M	0:06:53.364-0:06:53.630	CS2a	0.688128	8	2.5779
Trial 1	M1-2	C-P	M	0:06:53.630-0:06:53.896	CS2a	0.688128	8	2.5779
Trial 1	M1-2	C-P	M	0:06:53.896-0:06:54.162	CS2a	1.03907	8	3.89261
Trial 1	M1-2	C-P	M	0:06:54.162-0:06:54.428	CS2a	2.70527	8	10.1346
Trial 1	M1-2	C-P	M	0:06:54.428-0:06:54.694	CS2a	1.56812	8	5.87461
Trial 1	M1-2	C-P	M	0:06:54.694-0:06:54.960	CS2a	1.09606	8	4.10612
Trial 1	M1-2	C-P	M	0:06:54.960-0:06:55.226	CS2a	0.49539	8	1.85585
Trial 1	M1-2	C-P	M	0:06:55.226-0:06:55.492	CS2a	3.77692	8	14.1493
Trial 1	M1-2	C-P	M	0:06:55.492-0:06:55.758	CS2a	2.02031	8	7.56859
Trial 1	M1-2	C-P	M	0:06:55.758-0:06:56.024	CS2a	2.50895	8	9.39912
Trial 1	M1-2	C-P	M	0:06:56.024-0:06:56.290	CS2a	0.234505	8	0.878516
Trial 1	M1-2	C-P	M	0:06:56.290-0:06:56.556	CS2a	0.207661	8	0.777958
Trial 1	M1-2	C-P	M	0:06:56.556-0:06:56.822	CS2a	0.164767	8	0.617255
Trial 1	M1-2	C-P	M	0:06:56.822-0:06:57.088	CS2a	0.275822	8	1.03329
Trial 1	M1-2	C-P	M	0:06:57.088-0:06:57.354	CS2a	0.359101	8	1.34529
Trial 1	M1-2	C-P	M	0:06:57.354-0:06:57.620	CS2a	0.109973	8	0.411984
Trial 1	M1-2	C-P	M	0:06:57.620-0:06:57.886	CS2a	0.0254203	8	0.0952313
Trial 1	M1-2	C-P	M	0:06:57.886-0:06:58.152	CS2a	0.118311	8	0.443222
Trial 1	M1-2	C-P	M	0:06:58.152-0:06:58.418	CS2a	0.398243	7	1.70505
Trial 1	M1-2	C-P	M	0:06:58.418-0:06:58.684	CS2a	1.9653	8	7.36258
Trial 1	M1-2	C-P	M	0:06:58.684-0:06:58.950	CS2a	0.886375	8	3.32057
Trial 1	M1-2	C-P	M	0:06:58.950-0:06:59.216	CS2a	1.172	8	4.3906
Trial 1	M1-2	C-P	M	0:06:59.216-0:06:59.482	CS2a	0.63762	8	2.38871
Trial 1	M1-2	C-P	M	0:06:59.482-0:06:59.748	CS2a	0.413906	8	1.55059
Trial 1	M1-2	C-P	M	0:06:59.748-0:07:00.014	CS2a	0.413906	8	1.5506
Trial 1	M1-2	C-P	M	0:07:00.014-0:07:00.280	CS2b	0.413906	8	1.55059
Trial 1	M1-2	C-P	M	0:07:00.280-0:07:00.546	CS2b	0.413906	8	1.55059
Trial 1	M1-2	C-P	M	0:07:00.546-0:07:00.812	CS2b	0.866639	8	3.24665
Trial 1	M1-2	C-P	M	0:07:00.812-0:07:01.078	CS2b	1.24124	8	4.64998
Trial 1	M1-2	C-P	M	0:07:01.078-0:07:01.344	CS2b	1.91118	8	7.15975
Trial 1	M1-2	C-P	M	0:07:01.344-0:07:01.610	CS2b	3.20035	8	11.9893
Trial 1	M1-2	C-P	M	0:07:01.610-0:07:01.876	CS2b	1.91197	8	7.1627
Trial 1	M1-2	C-P	M	0:07:01.876-0:07:02.142	CS2b	0.877462	8	3.28721
Trial 1	M1-2	C-P	M	0:07:02.142-0:07:02.408	CS2b	0.656317	8	2.45872
Trial 1	M1-2	C-P	M	0:07:02.408-0:07:02.674	CS2b	0.413958	8	1.55079
Trial 1	M1-2	C-P	M	0:07:02.674-0:07:02.940	CS2b	0.265449	8	0.99444
Trial 1	M1-2	C-P	M	0:07:02.940-0:07:03.206	CS2b	0.242688	8	0.909168
Trial 1	M1-2	C-P	M	0:07:03.206-0:07:03.472	CS2b	0.210782	8	0.789646
Trial 1	M1-2	C-P	M	0:07:03.472-0:07:03.738	CS2b	0.195937	8	0.734029
Trial 1	M1-2	C-P	M	0:07:03.738-0:07:04.004	CS2b	0.723655	8	2.71099
Trial 1	M1-2	C-P	M	0:07:04.004-0:07:04.270	CS2b	3.08774	8	11.5674
Trial 1	M1-2	C-P	M	0:07:04.270-0:07:04.536	CS2b	2.12797	8	7.9719
Trial 1	M1-2	C-P	M	0:07:04.536-0:07:04.802	CS2b	1.18184	8	4.42747
Trial 1	M1-2	C-P	M	0:07:04.802-0:07:05.068	CS2b	0.376714	8	1.41126
Trial 1	M1-2	C-P	M	0:07:05.068-0:07:05.334	CS2b	0.954435	8	3.57556
Trial 1	M1-2	C-P	M	0:07:05.334-0:07:05.600	CS2b	0.321593	8	1.20476
Trial 1	M1-2	C-P	M	0:07:05.600-0:07:05.866	CS2b	0.259306	8	0.971419
Trial 1	M1-2	C-P	M	0:07:05.866-0:07:06.132	CS2b	0.0728882	8	0.273056
Trial 1	M1-2	C-P	M	0:07:06.132-0:07:06.398	CS2b	0.141633	8	0.53059
Trial 1	M1-2	C-P	M	0:07:06.398-0:07:06.664	CS2b	0.199722	8	0.748212
Trial 1	M1-2	C-P	M	0:07:06.664-0:07:06.930	CS2b	0.0801375	8	0.300215
Trial 1	M1-2	C-P	M	0:07:06.930-0:07:07.196	CS2b	0.467344	8	1.75078
Trial 1	M1-2	C-P	M	0:07:07.196-0:07:07.462	CS2b	0.203436	8	0.762126
Trial 1	M1-2	C-P	M	0:07:07.462-0:07:07.728	CS2b	0.184087	8	0.68963
Trial 1	M1-2	C-P	M	0:07:07.728-0:07:07.994	CS2b	0.342628	7	1.46693
Trial 1	M1-2	C-P	M	0:07:07.994-0:07:08.260	CS2b	2.53375	8	9.49209
Trial 1	M1-2	C-P	M	0:07:08.260-0:07:08.526	CS2b	3.20035	8	11.9893
Trial 1	M1-2	C-P	M	0:07:08.526-0:07:08.792	CS2b	2.17055	8	8.1314
Trial 1	M1-2	C-P	M	0:07:08.792-0:07:09.058	CS2b	0.985136	8	3.69058
Trial 1	M1-2	C-P	M	0:07:09.058-0:07:09.324	CS2b	1.15308	8	4.31973
Trial 1	M1-2	C-P	M	0:07:09.324-0:07:09.590	CS2b	1.86263	8	6.97792
Trial 1	M1-2	C-P	M	0:07:09.590-0:07:09.856	CS2b	0.73087	8	2.73802
Trial 1	M1-2	C-P	M	0:07:09.856-0:07:10.122	IT2	0.96247	8	3.60563
Trial 1	M1-2	C-P	M	0:07:10.122-0:07:10.388	IT2	0.716164	8	2.68294
Trial 1	M1-2	C-P	M	0:07:10.388-0:07:10.654	IT2	2.03253	8	7.61437
Trial 1	M1-2	C-P	M	0:07:10.654-0:07:10.920	IT2	1.34769	8	5.0488
Trial 1	M1-2	C-P	M	0:07:10.920-0:07:11.186	IT2	2.19701	8	8.23053
Trial 1	M1-2	C-P	M	0:07:11.186-0:07:11.452	IT2	1.2284	8	4.60189
Trial 1	M1-2	C-P	M	0:07:11.452-0:07:11.718	IT2	2.65059	8	9.92979
Trial 1	M1-2	C-P	M	0:07:11.718-0:07:11.984	IT2	2.02917	8	7.60178
Trial 1	M1-2	C-P	M	0:07:11.984-0:07:12.250	IT2	4.08023	8	15.2856
Trial 1	M1-2	C-P	M	0:07:12.250-0:07:12.516	IT2	3.8604	8	14.462
Trial 1	M1-2	C-P	M	0:07:12.516-0:07:12.782	IT2	2.92392	8	10.9537
Trial 1	M1-2	C-P	M	0:07:12.782-0:07:13.048	IT2	1.91917	8	7.18969
Trial 1	M1-2	C-P	M	0:07:13.048-0:07:13.314	IT2	2.04826	8	7.67327
Trial 1	M1-2	C-P	M	0:07:13.314-0:07:13.580	IT2	1.21075	8	4.5358
Trial 1	M1-2	C-P	M	0:07:13.580-0:07:13.846	IT2	2.98202	8	11.1714
Trial 1	M1-2	C-P	M	0:07:13.846-0:07:14.112	IT2	0.596817	8	2.23582
Trial 1	M1-2	C-P	M	0:07:14.112-0:07:14.378	IT2	0.627777	8	2.35181
Trial 1	M1-2	C-P	M	0:07:14.378-0:07:14.644	IT2	0.139517	8	0.522663
Trial 1	M1-2	C-P	M	0:07:14.644-0:07:14.910	IT2	0.0655374	8	0.24552
Trial 1	M1-2	C-P	M	0:07:14.910-0:07:15.176	IT2	0.605119	8	2.26692
Trial 1	M1-2	C-P	M	0:07:15.176-0:07:15.442	IT2	2.62456	8	9.83226
Trial 1	M1-2	C-P	M	0:07:15.442-0:07:15.708	IT2	1.88132	8	7.04792
Trial 1	M1-2	C-P	M	0:07:15.708-0:07:15.974	IT2	2.31114	8	8.65808
Trial 1	M1-2	C-P	M	0:07:15.974-0:07:16.240	IT2	2.23173	8	8.36065
Trial 1	M1-2	C-P	M	0:07:16.240-0:07:16.506	IT2	0.597752	8	2.23933
Trial 1	M1-2	C-P	M	0:07:16.506-0:07:16.772	IT2	0.53322	8	1.99758
Trial 1	M1-2	C-P	M	0:07:16.772-0:07:17.038	IT2	0.76973	8	2.88361
Trial 1	M1-2	C-P	M	0:07:17.038-0:07:17.304	IT2	2.02702	8	7.5937
Trial 1	M1-2	C-P	M	0:07:17.304-0:07:17.570	IT2	0.965548	7	4.13396
Trial 1	M1-2	C-P	M	0:07:17.570-0:07:17.836	IT2	0.833012	8	3.12066
Trial 1	M1-2	C-P	M	0:07:17.836-0:07:18.102	IT2	0.706467	8	2.64661
Trial 1	M1-2	C-P	M	0:07:18.102-0:07:18.368	IT2	0.302829	8	1.13448
Trial 1	M1-2	C-P	M	0:07:18.368-0:07:18.634	IT2	0.514678	8	1.9281
Trial 1	M1-2	C-P	M	0:07:18.634-0:07:18.900	IT2	0.510153	8	1.91116
Trial 1	M1-2	C-P	M	0:07:18.900-0:07:19.166	IT2	0.773109	8	2.89626
Trial 1	M1-2	C-P	M	0:07:19.166-0:07:19.432	IT2	0.571396	8	2.14059
Trial 1	M1-2	C-P	M	0:07:19.432-0:07:19.698	IT2	0.339741	8	1.27275
Trial 1	M1-2	C-P	M	0:07:19.698-0:07:19.964	IT2	0.139773	8	0.523622
Trial 1	M1-2	C-P	M	0:07:19.964-0:07:20.230	IT2	0.684891	8	2.56577
Trial 1	M1-2	C-P	M	0:07:20.230-0:07:20.496	IT2	1.14644	8	4.29487
Trial 1	M1-2	C-P	M	0:07:20.496-0:07:20.762	IT2	0.581665	8	2.17905
Trial 1	M1-2	C-P	M	0:07:20.762-0:07:21.028	IT2	4.44789	8	16.663
Trial 1	M1-2	C-P	M	0:07:21.028-0:07:21.294	IT2	3.97012	8	14.8731
Trial 1	M1-2	C-P	M	0:07:21.294-0:07:21.560	IT2	2.30802	8	8.64641
Trial 1	M1-2	C-P	M	0:07:21.560-0:07:21.826	IT2	3.48674	8	13.0622
Trial 1	M1-2	C-P	M	0:07:21.826-0:07:22.092	IT2	3.01446	8	11.2929
Trial 1	M1-2	C-P	M	0:07:22.092-0:07:22.358	IT2	1.54996	8	5.80655
Trial 1	M1-2	C-P	M	0:07:22.358-0:07:22.624	IT2	0.445089	8	1.66741
Trial 1	M1-2	C-P	M	0:07:22.624-0:07:22.890	IT2	0.173141	8	0.648625
Trial 1	M1-2	C-P	M	0:07:22.890-0:07:23.156	IT2	0.373388	8	1.39881
Trial 1	M1-2	C-P	M	0:07:23.156-0:07:23.422	IT2	0.34212	8	1.28167
Trial 1	M1-2	C-P	M	0:07:23.422-0:07:23.688	IT2	0.726454	8	2.72149
Trial 1	M1-2	C-P	M	0:07:23.688-0:07:23.954	IT2	0.393444	8	1.47393
Trial 1	M1-2	C-P	M	0:07:23.954-0:07:24.220	IT2	0.140095	8	0.524828
Trial 1	M1-2	C-P	M	0:07:24.220-0:07:24.486	IT2	0.215771	8	0.808339
Trial 1	M1-2	C-P	M	0:07:24.486-0:07:24.752	IT2	0.0815442	8	0.305483
Trial 1	M1-2	C-P	M	0:07:24.752-0:07:25.018	IT2	0.0676411	8	0.253403
Trial 1	M1-2	C-P	M	0:07:25.018-0:07:25.284	IT2	0.0903172	8	0.338349
Trial 1	M1-2	C-P	M	0:07:25.284-0:07:25.550	IT2	0.101034	8	0.378499
Trial 1	M1-2	C-P	M	0:07:25.550-0:07:25.816	IT2	0.197793	8	0.740979
Trial 1	M1-2	C-P	M	0:07:25.816-0:07:26.082	IT2	0.472468	8	1.76998
Trial 1	M1-2	C-P	M	0:07:26.082-0:07:26.348	IT2	1.02392	8	3.83587
Trial 1	M1-2	C-P	M	0:07:26.348-0:07:26.614	IT2	0.287925	8	1.07864
Trial 1	M1-2	C-P	M	0:07:26.614-0:07:26.880	IT2	0.604928	7	2.58995
Trial 1	M1-2	C-P	M	0:07:26.880-0:07:27.146	IT2	0.0988696	8	0.370392
Trial 1	M1-2	C-P	M	0:07:27.146-0:07:27.412	IT2	0.0476272	8	0.178423
Trial 1	M1-2	C-P	M	0:07:27.412-0:07:27.678	IT2	0.307566	8	1.15222
Trial 1	M1-2	C-P	M	0:07:27.678-0:07:27.944	IT2	0.63022	8	2.36098
Trial 1	M1-2	C-P	M	0:07:27.944-0:07:28.210	IT2	0.379349	8	1.42114
Trial 1	M1-2	C-P	M	0:07:28.210-0:07:28.476	IT2	0.21934	8	0.821707
Trial 1	M1-2	C-P	M	0:07:28.476-0:07:28.742	IT2	0.159103	8	0.59604
Trial 1	M1-2	C-P	M	0:07:28.742-0:07:29.008	IT2	0.228817	8	0.8572
Trial 1	M1-2	C-P	M	0:07:29.008-0:07:29.274	IT2	0.222524	8	0.83363
Trial 1	M1-2	C-P	M	0:07:29.274-0:07:29.540	IT2	0.167275	8	0.62665
Trial 1	M1-2	C-P	M	0:07:29.540-0:07:29.806	IT2	0.279882	8	1.0485
Trial 1	M1-2	C-P	M	0:07:29.806-0:07:30.072	IT2	0.452211	8	1.69409
Trial 1	M1-2	C-P	M	0:07:30.072-0:07:30.338	IT2	0.358743	8	1.34394
Trial 1	M1-2	C-P	M	0:07:30.338-0:07:30.604	IT2	0.392756	8	1.47137
Trial 1	M1-2	C-P	M	0:07:30.604-0:07:30.870	IT2	0.548704	8	2.05557
Trial 1	M1-2	C-P	M	0:07:30.870-0:07:31.136	IT2	0.678366	8	2.54133
Trial 1	M1-2	C-P	M	0:07:31.136-0:07:31.402	IT2	0.280336	8	1.05021
Trial 1	M1-2	C-P	M	0:07:31.402-0:07:31.668	IT2	0.354022	8	1.32625
Trial 1	M1-2	C-P	M	0:07:31.668-0:07:31.934	IT2	0.484317	8	1.81438
Trial 1	M1-2	C-P	M	0:07:31.934-0:07:32.200	IT2	0.338048	8	1.26641
Trial 1	M1-2	C-P	M	0:07:32.200-0:07:32.466	IT2	0.593088	8	2.22185
Trial 1	M1-2	C-P	M	0:07:32.466-0:07:32.732	IT2	0.58547	8	2.19333
Trial 1	M1-2	C-P	M	0:07:32.732-0:07:32.998	IT2	0.213881	8	0.801255
Trial 1	M1-2	C-P	M	0:07:32.998-0:07:33.264	IT2	0.273883	8	1.02604
Trial 1	M1-2	C-P	M	0:07:33.264-0:07:33.530	IT2	0.3126	8	1.17107
Trial 1	M1-2	C-P	M	0:07:33.530-0:07:33.796	IT2	0.336703	8	1.26137
Trial 1	M1-2	C-P	M	0:07:33.796-0:07:34.062	IT2	0.504641	8	1.89051
Trial 1	M1-2	C-P	M	0:07:34.062-0:07:34.328	IT2	0.325581	8	1.21971
Trial 1	M1-2	C-P	M	0:07:34.328-0:07:34.594	IT2	0.335464	8	1.25674
Trial 1	M1-2	C-P	M	0:07:34.594-0:07:34.860	IT2	0.27289	8	1.02231
Trial 1	M1-2	C-P	M	0:07:34.860-0:07:35.126	IT2	0.395727	8	1.48249
Trial 1	M1-2	C-P	M	0:07:35.126-0:07:35.392	IT2	0.229295	8	0.859001
Trial 1	M1-2	C-P	M	0:07:35.392-0:07:35.658	IT2	0.151012	8	0.565728
Trial 1	M1-2	C-P	M	0:07:35.658-0:07:35.924	IT2	0.336202	8	1.2595
Trial 1	M1-2	C-P	M	0:07:35.924-0:07:36.190	IT2	0.445464	8	1.66881
Trial 1	M1-2	C-P	M	0:07:36.190-0:07:36.456	IT2	0.381254	7	1.63232
Trial 1	M1-2	C-P	M	0:07:36.456-0:07:36.722	IT2	0.153652	8	0.575622
Trial 1	M1-2	C-P	M	0:07:36.722-0:07:36.988	IT2	0.0502015	8	0.188067
Trial 1	M1-2	C-P	M	0:07:36.988-0:07:37.254	IT2	0.199181	8	0.746177
Trial 1	M1-2	C-P	M	0:07:37.254-0:07:37.520	IT2	0.507515	8	1.90129
Trial 1	M1-2	C-P	M	0:07:37.520-0:07:37.786	IT2	0.529284	8	1.98282
Trial 1	M1-2	C-P	M	0:07:37.786-0:07:38.052	IT2	0.540734	8	2.02572
Trial 1	M1-2	C-P	M	0:07:38.052-0:07:38.318	IT2	0.445759	8	1.66992
Trial 1	M1-2	C-P	M	0:07:38.318-0:07:38.584	IT2	1.01144	8	3.78909
Trial 1	M1-2	C-P	M	0:07:38.584-0:07:38.850	IT2	0.783455	8	2.93502
Trial 1	M1-2	C-P	M	0:07:38.850-0:07:39.116	IT2	0.61151	8	2.29087
Trial 1	M1-2	C-P	M	0:07:39.116-0:07:39.382	IT2	0.639201	8	2.39462
Trial 1	M1-2	C-P	M	0:07:39.382-0:07:39.648	IT2	0.747673	8	2.80096
Trial 1	M1-2	C-P	M	0:07:39.648-0:07:39.914	IT2	0.333813	8	1.25055
Trial 1	M1-2	C-P	M	0:07:39.914-0:07:40.180	IT2	0.486466	8	1.82242
Trial 1	M1-2	C-P	M	0:07:40.180-0:07:40.446	IT2	0.8207	8	3.07454
Trial 1	M1-2	C-P	M	0:07:40.446-0:07:40.712	IT2	0.636636	8	2.38501
Trial 1	M1-2	C-P	M	0:07:40.712-0:07:40.978	IT2	1.23902	8	4.64168
Trial 1	M1-2	C-P	M	0:07:40.978-0:07:41.244	IT2	0.542593	8	2.03269
Trial 1	M1-2	C-P	M	0:07:41.244-0:07:41.510	IT2	0.509614	8	1.90914
Trial 1	M1-2	C-P	M	0:07:41.510-0:07:41.776	IT2	0.73736	8	2.76232
Trial 1	M1-2	C-P	M	0:07:41.776-0:07:42.042	IT2	0.334551	8	1.25331
Trial 1	M1-2	C-P	M	0:07:42.042-0:07:42.308	IT2	0.354979	8	1.32983
Trial 1	M1-2	C-P	M	0:07:42.308-0:07:42.574	IT2	0.476424	8	1.78479
Trial 1	M1-2	C-P	M	0:07:42.574-0:07:42.840	IT2	0.348725	8	1.30642
Trial 1	M1-2	C-P	M	0:07:42.840-0:07:43.106	IT2	0.324192	8	1.2145
Trial 1	M1-2	C-P	M	0:07:43.106-0:07:43.372	IT2	0.477979	8	1.79065
Trial 1	M1-2	C-P	M	0:07:43.372-0:07:43.638	IT2	0.642129	8	2.40558
Trial 1	M1-2	C-P	M	0:07:43.638-0:07:43.904	IT2	0.416228	8	1.55929
Trial 1	M1-2	C-P	M	0:07:43.904-0:07:44.170	IT2	0.350727	8	1.31391
Trial 1	M1-2	C-P	M	0:07:44.170-0:07:44.436	IT2	0.303377	8	1.13654
Trial 1	M1-2	C-P	M	0:07:44.436-0:07:44.702	IT2	0.516909	8	1.93647
Trial 1	M1-2	C-P	M	0:07:44.702-0:07:44.968	IT2	0.596181	8	2.23344
Trial 1	M1-2	C-P	M	0:07:44.968-0:07:45.234	IT2	0.328254	8	1.22973
Trial 1	M1-2	C-P	M	0:07:45.234-0:07:45.500	IT2	0.483598	8	1.81169
Trial 1	M1-2	C-P	M	0:07:45.500-0:07:45.766	IT2	1.15088	8	4.31148
Trial 1	M1-2	C-P	M	0:07:45.766-0:07:46.032	IT2	0.687062	7	2.9416
Trial 1	M1-2	C-P	M	0:07:46.032-0:07:46.298	IT2	1.16511	8	4.36478
Trial 1	M1-2	C-P	M	0:07:46.298-0:07:46.564	IT2	0.824311	8	3.08806
Trial 1	M1-2	C-P	M	0:07:46.564-0:07:46.830	IT2	1.35451	8	5.07434
Trial 1	M1-2	C-P	M	0:07:46.830-0:07:47.096	IT2	1.4771	8	5.53359
Trial 1	M1-2	C-P	M	0:07:47.096-0:07:47.362	IT2	0.68486	8	2.56565
Trial 1	M1-2	C-P	M	0:07:47.362-0:07:47.628	IT2	0.556771	8	2.08582
Trial 1	M1-2	C-P	M	0:07:47.628-0:07:47.894	IT2	0.522381	8	1.95696
Trial 1	M1-2	C-P	M	0:07:47.894-0:07:48.160	IT2	0.148495	8	0.556301
Trial 1	M1-2	C-P	M	0:07:48.160-0:07:48.426	IT2	0.340578	8	1.27589
Trial 1	M1-2	C-P	M	0:07:48.426-0:07:48.692	IT2	1.20105	8	4.49943
Trial 1	M1-2	C-P	M	0:07:48.692-0:07:48.958	IT2	1.07998	8	4.04587
Trial 1	M1-2	C-P	M	0:07:48.958-0:07:49.224	IT2	1.43465	8	5.37454
Trial 1	M1-2	C-P	M	0:07:49.224-0:07:49.490	IT2	1.11159	8	4.16428
Trial 1	M1-2	C-P	M	0:07:49.490-0:07:49.756	IT2	1.79841	8	6.73732
Trial 1	M1-2	C-P	M	0:07:49.756-0:07:50.022	IT2	0.723492	8	2.71037
Trial 1	M1-2	C-P	M	0:07:50.022-0:07:50.288	IT2	0.29197	8	1.09379
Trial 1	M1-2	C-P	M	0:07:50.288-0:07:50.554	IT2	0.28161	8	1.05498
Trial 1	M1-2	C-P	M	0:07:50.554-0:07:50.820	IT2	0.125989	8	0.471986
Trial 1	M1-2	C-P	M	0:07:50.820-0:07:51.086	IT2	0.383123	8	1.43527
Trial 1	M1-2	C-P	M	0:07:51.086-0:07:51.352	IT2	0.277609	8	1.03999
Trial 1	M1-2	C-P	M	0:07:51.352-0:07:51.618	IT2	0.221675	8	0.830453
Trial 1	M1-2	C-P	M	0:07:51.618-0:07:51.884	IT2	0.490177	8	1.83633
Trial 1	M1-2	C-P	M	0:07:51.884-0:07:52.150	IT2	1.01918	8	3.81811
Trial 1	M1-2	C-P	M	0:07:52.150-0:07:52.416	IT2	1.99336	8	7.46764
Trial 1	M1-2	C-P	M	0:07:52.416-0:07:52.682	IT2	5.17445	8	19.3847
Trial 1	M1-2	C-P	M	0:07:52.682-0:07:52.948	IT2	2.86658	8	10.7389
Trial 1	M1-2	C-P	M	0:07:52.948-0:07:53.214	IT2	1.56327	8	5.85638
Trial 1	M1-2	C-P	M	0:07:53.214-0:07:53.480	IT2	1.14368	8	4.28451
Trial 1	M1-2	C-P	M	0:07:53.480-0:07:53.746	IT2	0.509529	8	1.90884
Trial 1	M1-2	C-P	M	0:07:53.746-0:07:54.012	IT2	0.498173	8	1.86627
Trial 1	M1-2	C-P	M	0:07:54.012-0:07:54.278	IT2	0.449778	8	1.68498
Trial 1	M1-2	C-P	M	0:07:54.278-0:07:54.544	IT2	0.430448	8	1.61256
Trial 1	M1-2	C-P	M	0:07:54.544-0:07:54.810	IT2	0.136518	8	0.51143
Trial 1	M1-2	C-P	M	0:07:54.810-0:07:55.076	IT2	0.544609	8	2.04024
Trial 1	M1-2	C-P	M	0:07:55.076-0:07:55.342	IT2	0.309698	7	1.32595
Trial 1	M1-2	C-P	M	0:07:55.342-0:07:55.608	IT2	0.729843	8	2.73418
Trial 1	M1-2	C-P	M	0:07:55.608-0:07:55.874	IT2	0.569333	8	2.13287
Trial 1	M1-2	C-P	M	0:07:55.874-0:07:56.140	IT2	0.750229	8	2.81053
Trial 1	M1-2	C-P	M	0:07:56.140-0:07:56.406	IT2	0.372713	8	1.39628
Trial 1	M1-2	C-P	M	0:07:56.406-0:07:56.672	IT2	0.273533	8	1.02473
Trial 1	M1-2	C-P	M	0:07:56.672-0:07:56.938	IT2	0.249509	8	0.934718
Trial 1	M1-2	C-P	M	0:07:56.938-0:07:57.204	IT2	0.254722	8	0.954255
Trial 1	M1-2	C-P	M	0:07:57.204-0:07:57.470	IT2	0.308397	8	1.15533
Trial 1	M1-2	C-P	M	0:07:57.470-0:07:57.736	IT2	0.557482	8	2.08848
Trial 1	M1-2	C-P	M	0:07:57.736-0:07:58.002	IT2	0.646019	8	2.42015
Trial 1	M1-2	C-P	M	0:07:58.002-0:07:58.268	IT2	0.570475	8	2.13713
Trial 1	M1-2	C-P	M	0:07:58.268-0:07:58.534	IT2	0.40364	8	1.51215
Trial 1	M1-2	C-P	M	0:07:58.534-0:07:58.800	IT2	0.711723	8	2.66628
Trial 1	M1-2	C-P	M	0:07:58.800-0:07:59.066	IT2	0.599334	8	2.24526
Trial 1	M1-2	C-P	M	0:07:59.066-0:07:59.332	IT2	0.539196	8	2.01995
Trial 1	M1-2	C-P	M	0:07:59.332-0:07:59.598	IT2	0.486938	8	1.8242
Trial 1	M1-2	C-P	M	0:07:59.598-0:07:59.864	IT2	0.346803	8	1.29921
Trial 1	M1-2	C-P	M	0:07:59.864-0:08:00.130	IT2	0.339582	8	1.27215
Trial 1	M1-2	C-P	M	0:08:00.130-0:08:00.396	IT2	0.516473	8	1.93484
Trial 1	M1-2	C-P	M	0:08:00.396-0:08:00.662	IT2	0.404528	8	1.51547
Trial 1	M1-2	C-P	M	0:08:00.662-0:08:00.928	IT2	0.40068	8	1.50105
Trial 1	M1-2	C-P	M	0:08:00.928-0:08:01.194	IT2	0.326961	8	1.22488
Trial 1	M1-2	C-P	M	0:08:01.194-0:08:01.460	IT2	0.297904	8	1.11602
Trial 1	M1-2	C-P	M	0:08:01.460-0:08:01.726	IT2	0.2748	8	1.02947
Trial 1	M1-2	C-P	M	0:08:01.726-0:08:01.992	IT2	0.224628	8	0.841513
Trial 1	M1-2	C-P	M	0:08:01.992-0:08:02.258	IT2	0.393624	8	1.47461
Trial 1	M1-2	C-P	M	0:08:02.258-0:08:02.524	IT2	0.340389	8	1.27519
Trial 1	M1-2	C-P	M	0:08:02.524-0:08:02.790	IT2	0.267785	8	1.00319
Trial 1	M1-2	C-P	M	0:08:02.790-0:08:03.056	IT2	0.222346	8	0.832966
Trial 1	M1-2	C-P	M	0:08:03.056-0:08:03.322	IT2	0.350005	8	1.3112
Trial 1	M1-2	C-P	M	0:08:03.322-0:08:03.588	IT2	0.356139	8	1.33419
Trial 1	M1-2	C-P	M	0:08:03.588-0:08:03.854	IT2	0.518945	8	1.9441
Trial 1	M1-2	C-P	M	0:08:03.854-0:08:04.120	IT2	0.685569	8	2.56831
Trial 1	M1-2	C-P	M	0:08:04.120-0:08:04.386	IT2	0.289567	8	1.08479
Trial 1	M1-2	C-P	M	0:08:04.386-0:08:04.652	IT2	0.604703	8	2.26537
Trial 1	M1-2	C-P	M	0:08:04.652-0:08:04.918	IT2	0.547272	7	2.34309
Trial 1	M1-2	C-P	M	0:08:04.918-0:08:05.184	IT2	0.47102	8	1.76456
Trial 1	M1-2	C-P	M	0:08:05.184-0:08:05.450	IT2	1.16385	8	4.36007
Trial 1	M1-2	C-P	M	0:08:05.450-0:08:05.716	IT2	0.637277	8	2.3874
Trial 1	M1-2	C-P	M	0:08:05.716-0:08:05.982	IT2	1.18809	8	4.45087
Trial 1	M1-2	C-P	M	0:08:05.982-0:08:06.248	IT2	1.25755	8	4.71107
Trial 1	M1-2	C-P	M	0:08:06.248-0:08:06.514	IT2	0.387554	8	1.45188
Trial 1	M1-2	C-P	M	0:08:06.514-0:08:06.780	IT2	0.301103	8	1.12801
Trial 1	M1-2	C-P	M	0:08:06.780-0:08:07.046	IT2	0.31218	8	1.1695
Trial 1	M1-2	C-P	M	0:08:07.046-0:08:07.312	IT2	0.739003	8	2.7685
Trial 1	M1-2	C-P	M	0:08:07.312-0:08:07.578	IT2	0.464435	8	1.73988
Trial 1	M1-2	C-P	M	0:08:07.578-0:08:07.844	IT2	0.486985	8	1.82436
Trial 1	M1-2	C-P	M	0:08:07.844-0:08:08.110	IT2	0.431278	8	1.61569
Trial 1	M1-2	C-P	M	0:08:08.110-0:08:08.376	IT2	0.408512	8	1.53038
Trial 1	M1-2	C-P	M	0:08:08.376-0:08:08.642	IT2	0.376059	8	1.40882
Trial 1	M1-2	C-P	M	0:08:08.642-0:08:08.908	IT2	0.394873	8	1.47929
Trial 1	M1-2	C-P	M	0:08:08.908-0:08:09.174	IT2	0.43462	8	1.6282
Trial 1	M1-2	C-P	M	0:08:09.174-0:08:09.440	IT2	0.496148	8	1.8587
Trial 1	M1-2	C-P	M	0:08:09.440-0:08:09.706	IT2	1.2979	8	4.86225
Trial 1	M1-2	C-P	M	0:08:09.706-0:08:09.972	IT2	0.134399	8	0.50349
Trial 1	M1-2	C-P	M	0:08:09.972-0:08:10.238	IT2	0.634596	8	2.37736
Trial 1	M1-2	C-P	M	0:08:10.238-0:08:10.504	IT2	0.969851	8	3.63329
Trial 1	M1-2	C-P	M	0:08:10.504-0:08:10.770	IT2	0.526899	8	1.97391
Trial 1	M1-2	C-P	M	0:08:10.770-0:08:11.036	IT2	0.463626	8	1.73686
Trial 1	M1-2	C-P	M	0:08:11.036-0:08:11.302	IT2	0.426781	8	1.59883
Trial 1	M1-2	C-P	M	0:08:11.302-0:08:11.568	IT2	0.645019	8	2.41641
Trial 1	M1-2	C-P	M	0:08:11.568-0:08:11.834	IT2	0.340226	8	1.27458
Trial 1	M1-2	C-P	M	0:08:11.834-0:08:12.100	IT2	0.279673	8	1.04773
Trial 1	M1-2	C-P	M	0:08:12.100-0:08:12.366	IT2	0.18921	8	0.708831
Trial 1	M1-2	C-P	M	0:08:12.366-0:08:12.632	IT2	0.482899	8	1.80908
Trial 1	M1-2	C-P	M	0:08:12.632-0:08:12.898	IT2	0.658546	8	2.46706
Trial 1	M1-2	C-P	M	0:08:12.898-0:08:13.164	IT2	2.10267	8	7.87722
Trial 1	M1-2	C-P	M	0:08:13.164-0:08:13.430	IT2	0.47256	8	1.77034
Trial 1	M1-2	C-P	M	0:08:13.430-0:08:13.696	IT2	0.482878	8	1.80898
Trial 1	M1-2	C-P	M	0:08:13.696-0:08:13.962	IT2	0.498248	8	1.86657
Trial 1	M1-2	C-P	M	0:08:13.962-0:08:14.228	IT2	0.602665	8	2.25772
Trial 1	M1-2	C-P	M	0:08:14.228-0:08:14.494	IT2	0.136858	7	0.585949
Trial 1	M1-2	C-P	M	0:08:14.494-0:08:14.760	IT2	0.172573	8	0.646506
Trial 1	M1-2	C-P	M	0:08:14.760-0:08:15.026	IT2	0.235923	8	0.883827
Trial 1	M1-2	C-P	M	0:08:15.026-0:08:15.292	IT2	0.458018	8	1.71585
Trial 1	M1-2	C-P	M	0:08:15.292-0:08:15.558	IT2	0.842087	8	3.15466
Trial 1	M1-2	C-P	M	0:08:15.558-0:08:15.824	IT2	0.56532	8	2.11783
Trial 1	M1-2	C-P	M	0:08:15.824-0:08:16.090	IT2	0.757469	8	2.83768
Trial 1	M1-2	C-P	M	0:08:16.090-0:08:16.356	IT2	0.683948	8	2.56225
Trial 1	M1-2	C-P	M	0:08:16.356-0:08:16.622	IT2	1.57798	8	5.91153
Trial 1	M1-2	C-P	M	0:08:16.622-0:08:16.888	IT2	0.861652	8	3.22797
Trial 1	M1-2	C-P	M	0:08:16.888-0:08:17.154	IT2	0.763789	8	2.86134
Trial 1	M1-2	C-P	M	0:08:17.154-0:08:17.420	IT2	2.59638	8	9.72671
Trial 1	M1-2	C-P	M	0:08:17.420-0:08:17.686	IT2	2.72983	8	10.2266
Trial 1	M1-2	C-P	M	0:08:17.686-0:08:17.952	IT2	1.01091	8	3.78713
Trial 1	M1-2	C-P	M	0:08:17.952-0:08:18.218	IT2	1.25333	8	4.69528
Trial 1	M1-2	C-P	M	0:08:18.218-0:08:18.484	IT2	0.39576	8	1.48261
Trial 1	M1-2	C-P	M	0:08:18.484-0:08:18.750	IT2	0.777646	8	2.91327
Trial 1	M1-2	C-P	M	0:08:18.750-0:08:19.016	IT2	0.557887	8	2.08999
Trial 1	M1-2	C-P	M	0:08:19.016-0:08:19.282	IT2	0.22611	8	0.847065
Trial 1	M1-2	C-P	M	0:08:19.282-0:08:19.548	IT2	0.317886	8	1.19088
Trial 1	M1-2	C-P	M	0:08:19.548-0:08:19.814	IT2	0.264076	8	0.989291
Trial 1	M1-2	C-P	M	0:08:19.814-0:08:20.080	IT2	0.208513	8	0.781142
Trial 1	M1-2	C-P	M	0:08:20.080-0:08:20.346	IT2	0.146005	8	0.546969
Trial 1	M1-2	C-P	M	0:08:20.346-0:08:20.612	IT2	0.163885	8	0.613953
Trial 1	M1-2	C-P	M	0:08:20.612-0:08:20.878	IT2	0.232932	8	0.872623
Trial 1	M1-2	C-P	M	0:08:20.878-0:08:21.144	IT2	0.156922	8	0.58787
Trial 1	M1-2	C-P	M	0:08:21.144-0:08:21.410	IT2	0.133079	8	0.498549
Trial 1	M1-2	C-P	M	0:08:21.410-0:08:21.676	IT2	0.144962	8	0.543063
Trial 1	M1-2	C-P	M	0:08:21.676-0:08:21.942	IT2	0.118815	8	0.445111
Trial 1	M1-2	C-P	M	0:08:21.942-0:08:22.208	IT2	0.197708	8	0.740664
Trial 1	M1-2	C-P	M	0:08:22.208-0:08:22.474	IT2	0.155075	8	0.580947
Trial 1	M1-2	C-P	M	0:08:22.474-0:08:22.740	IT2	0.289289	8	1.08375
Trial 1	M1-2	C-P	M	0:08:22.740-0:08:23.006	IT2	0.223933	8	0.838907
Trial 1	M1-2	C-P	M	0:08:23.006-0:08:23.272	IT2	0.147158	8	0.551292
Trial 1	M1-2	C-P	M	0:08:23.272-0:08:23.538	IT2	0.602324	8	2.25646
Trial 1	M1-2	C-P	M	0:08:23.538-0:08:23.804	IT2	0.589637	8	2.20892
Trial 1	M1-2	C-P	M	0:08:23.804-0:08:24.070	IT2	0.592139	7	2.53521
Trial 1	M1-2	C-P	M	0:08:24.070-0:08:24.336	IT2	0.516188	8	1.93378
Trial 1	M1-2	C-P	M	0:08:24.336-0:08:24.602	IT2	0.363891	8	1.36322
Trial 1	M1-2	C-P	M	0:08:24.602-0:08:24.868	IT2	0.23294	8	0.872646
Trial 1	M1-2	C-P	M	0:08:24.868-0:08:25.134	IT2	0.204513	8	0.766164
Trial 1	M1-2	C-P	M	0:08:25.134-0:08:25.400	IT2	0.15065	8	0.56437
Trial 1	M1-2	C-P	M	0:08:25.400-0:08:25.666	IT2	0.310234	8	1.16222
Trial 1	M1-2	C-P	M	0:08:25.666-0:08:25.932	IT2	0.271479	8	1.01702
Trial 1	M1-2	C-P	M	0:08:25.932-0:08:26.198	IT2	0.215347	8	0.806744
Trial 1	M1-2	C-P	M	0:08:26.198-0:08:26.464	IT2	0.230918	8	0.865075
Trial 1	M1-2	C-P	M	0:08:26.464-0:08:26.730	IT2	0.212713	8	0.796876
Trial 1	M1-2	C-P	M	0:08:26.730-0:08:26.996	IT2	0.467259	8	1.75047
Trial 1	M1-2	C-P	M	0:08:26.996-0:08:27.262	IT2	0.625633	8	2.34377
Trial 1	M1-2	C-P	M	0:08:27.262-0:08:27.528	IT2	0.522556	8	1.95762
Trial 1	M1-2	C-P	M	0:08:27.528-0:08:27.794	IT2	0.528119	8	1.97848
Trial 1	M1-2	C-P	M	0:08:27.794-0:08:28.060	IT2	0.461749	8	1.72983
Trial 1	M1-2	C-P	M	0:08:28.060-0:08:28.326	IT2	0.49146	8	1.84113
Trial 1	M1-2	C-P	M	0:08:28.326-0:08:28.592	IT2	0.540789	8	2.02593
Trial 1	M1-2	C-P	M	0:08:28.592-0:08:28.858	IT2	0.584859	8	2.19102
Trial 1	M1-2	C-P	M	0:08:28.858-0:08:29.124	IT2	0.58523	8	2.19242
Trial 1	M1-2	C-P	M	0:08:29.124-0:08:29.390	IT2	0.477246	8	1.78787
Trial 1	M1-2	C-P	M	0:08:29.390-0:08:29.656	IT2	0.464942	8	1.74179
Trial 1	M1-2	C-P	M	0:08:29.656-0:08:29.922	IT2	0.585667	8	2.19405
Trial 1	M1-2	C-P	M	0:08:29.922-0:08:30.188	IT2	0.473459	8	1.77369
Trial 1	M1-2	C-P	M	0:08:30.188-0:08:30.454	IT2	0.722815	8	2.70785
Trial 1	M1-2	C-P	M	0:08:30.454-0:08:30.720	IT2	0.511618	8	1.91665
Trial 1	M1-2	C-P	M	0:08:30.720-0:08:30.986	IT2	0.727802	8	2.72652
Trial 1	M1-2	C-P	M	0:08:30.986-0:08:31.252	IT2	0.366601	8	1.37338
Trial 1	M1-2	C-P	M	0:08:31.252-0:08:31.518	IT2	0.515523	8	1.93127
Trial 1	M1-2	C-P	M	0:08:31.518-0:08:31.784	IT2	0.775531	8	2.90534
Trial 1	M1-2	C-P	M	0:08:31.784-0:08:32.050	IT2	0.673663	8	2.5237
Trial 1	M1-2	C-P	M	0:08:32.050-0:08:32.316	IT2	0.336237	8	1.25963
Trial 1	M1-2	C-P	M	0:08:32.316-0:08:32.582	IT2	0.192145	8	0.719822
Trial 1	M1-2	C-P	M	0:08:32.582-0:08:32.848	IT2	0.299115	8	1.12056
Trial 1	M1-2	C-P	M	0:08:32.848-0:08:33.114	IT2	0.175539	8	0.657618
Trial 1	M1-2	C-P	M	0:08:33.114-0:08:33.380	IT2	0.151548	7	0.648841
Trial 1	M1-2	C-P	M	0:08:33.380-0:08:33.646	IT2	0.122037	8	0.457181
Trial 1	M1-2	C-P	M	0:08:33.646-0:08:33.912	IT2	0.156436	8	0.586046
Trial 1	M1-2	C-P	M	0:08:33.912-0:08:34.178	IT2	0.152559	8	0.571522
Trial 1	M1-2	C-P	M	0:08:34.178-0:08:34.444	IT2	0.25163	8	0.942667
Trial 1	M1-2	C-P	M	0:08:34.444-0:08:34.710	IT2	0.303612	8	1.1374
Trial 1	M1-2	C-P	M	0:08:34.710-0:08:34.976	IT2	0.337668	8	1.26499
Trial 1	M1-2	C-P	M	0:08:34.976-0:08:35.242	IT2	0.433807	8	1.62515
Trial 1	M1-2	C-P	M	0:08:35.242-0:08:35.508	IT2	0.461387	8	1.72847
Trial 1	M1-2	C-P	M	0:08:35.508-0:08:35.774	IT2	0.362213	8	1.35694
Trial 1	M1-2	C-P	M	0:08:35.774-0:08:36.040	IT2	0.22349	8	0.83725
Trial 1	M1-2	C-P	M	0:08:36.040-0:08:36.306	IT2	0.517517	8	1.93875
Trial 1	M1-2	C-P	M	0:08:36.306-0:08:36.572	IT2	0.96337	8	3.60902
Trial 1	M1-2	C-P	M	0:08:36.572-0:08:36.838	IT2	1.09627	8	4.1069
Trial 1	M1-2	C-P	M	0:08:36.838-0:08:37.104	IT2	0.706568	8	2.64699
Trial 1	M1-2	C-P	M	0:08:37.104-0:08:37.370	IT2	0.755835	8	2.83154
Trial 1	M1-2	C-P	M	0:08:37.370-0:08:37.636	IT2	0.663229	8	2.48461
Trial 1	M1-2	C-P	M	0:08:37.636-0:08:37.902	IT2	0.622567	8	2.3323
Trial 1	M1-2	C-P	M	0:08:37.902-0:08:38.168	IT2	0.609049	8	2.28165
Trial 1	M1-2	C-P	M	0:08:38.168-0:08:38.434	IT2	0.411484	8	1.54153
Trial 1	M1-2	C-P	M	0:08:38.434-0:08:38.700	IT2	0.813229	8	3.04655
Trial 1	M1-2	C-P	M	0:08:38.700-0:08:38.966	IT2	1.35013	8	5.05791
Trial 1	M1-2	C-P	M	0:08:38.966-0:08:39.232	IT2	0.927009	8	3.47283
Trial 1	M1-2	C-P	M	0:08:39.232-0:08:39.498	IT2	0.532172	8	1.99364
Trial 1	M1-2	C-P	M	0:08:39.498-0:08:39.764	IT2	0.682545	8	2.557
Trial 1	M1-2	C-P	M	0:08:39.764-0:08:40.030	IT2	0.837637	8	3.13799
Trial 1	M1-2	C-P	M	0:08:40.030-0:08:40.296	IT2	1.35087	8	5.0607
Trial 1	M1-2	C-P	M	0:08:40.296-0:08:40.562	IT2	0.55689	8	2.08626
Trial 1	M1-2	C-P	M	0:08:40.562-0:08:40.828	IT2	0.693483	8	2.59795
Trial 1	M1-2	C-P	M	0:08:40.828-0:08:41.094	IT2	0.111562	8	0.417938
Trial 1	M1-2	C-P	M	0:08:41.094-0:08:41.360	IT2	0.11533	8	0.432057
Trial 1	M1-2	C-P	M	0:08:41.360-0:08:41.626	IT2	0.259083	8	0.970582
Trial 1	M1-2	C-P	M	0:08:41.626-0:08:41.892	IT2	0.861565	8	3.22765
Trial 1	M1-2	C-P	M	0:08:41.892-0:08:42.158	IT2	0.661826	8	2.47936
Trial 1	M1-2	C-P	M	0:08:42.158-0:08:42.424	IT2	0.521344	8	1.95309
Trial 1	M1-2	C-P	M	0:08:42.424-0:08:42.690	IT2	0.653416	8	2.44786
Trial 1	M1-2	C-P	M	0:08:42.690-0:08:42.956	IT2	0.159177	7	0.681502
Trial 1	M1-2	C-P	M	0:08:42.956-0:08:43.222	IT2	0.210973	8	0.790355
Trial 1	M1-2	C-P	M	0:08:43.222-0:08:43.488	IT2	0.474381	8	1.77716
Trial 1	M1-2	C-P	M	0:08:43.488-0:08:43.754	IT2	0.559379	8	2.09557
Trial 1	M1-2	C-P	M	0:08:43.754-0:08:44.020	IT2	0.419275	8	1.57071
Trial 1	M1-2	C-P	M	0:08:44.020-0:08:44.286	IT2	0.342783	8	1.28415
Trial 1	M1-2	C-P	M	0:08:44.286-0:08:44.552	IT2	0.368641	8	1.38102
Trial 1	M1-2	C-P	M	0:08:44.552-0:08:44.818	IT2	0.322127	8	1.20677
Trial 1	M1-2	C-P	M	0:08:44.818-0:08:45.084	IT2	0.27225	8	1.01991
Trial 1	M1-2	C-P	M	0:08:45.084-0:08:45.350	IT2	0.298241	8	1.11729
Trial 1	M1-2	C-P	M	0:08:45.350-0:08:45.616	IT2	0.391098	8	1.46516
Trial 1	M1-2	C-P	M	0:08:45.616-0:08:45.882	IT2	0.442665	8	1.65834
Trial 1	M1-2	C-P	M	0:08:45.882-0:08:46.148	IT2	0.410364	8	1.53733
Trial 1	M1-2	C-P	M	0:08:46.148-0:08:46.414	IT2	0.31016	8	1.16193
Trial 1	M1-2	C-P	M	0:08:46.414-0:08:46.680	IT2	0.388535	8	1.45555
Trial 1	M1-2	C-P	M	0:08:46.680-0:08:46.946	IT2	0.355729	8	1.33265
Trial 1	M1-2	C-P	M	0:08:46.946-0:08:47.212	IT2	0.276214	8	1.03477
Trial 1	M1-2	C-P	M	0:08:47.212-0:08:47.478	IT2	0.352061	8	1.31891
Trial 1	M1-2	C-P	M	0:08:47.478-0:08:47.744	IT2	0.282843	8	1.05959
Trial 1	M1-2	C-P	M	0:08:47.744-0:08:48.010	IT2	0.359532	8	1.34689
Trial 1	M1-2	C-P	M	0:08:48.010-0:08:48.276	IT2	0.395206	8	1.48053
Trial 1	M1-2	C-P	M	0:08:48.276-0:08:48.542	IT2	0.192378	8	0.720692
Trial 1	M1-2	C-P	M	0:08:48.542-0:08:48.808	IT2	0.243388	8	0.911795
Trial 1	M1-2	C-P	M	0:08:48.808-0:08:49.074	IT2	0.237634	8	0.890236
Trial 1	M1-2	C-P	M	0:08:49.074-0:08:49.340	IT2	0.320908	8	1.20221
Trial 1	M1-2	C-P	M	0:08:49.340-0:08:49.606	IT2	0.169593	8	0.635334
Trial 1	M1-2	C-P	M	0:08:49.606-0:08:49.872	IT2	0.422045	8	1.58108
Trial 1	M1-2	C-P	M	0:08:49.872-0:08:50.138	IT2	0.275039	8	1.03037
Trial 1	M1-2	C-P	M	0:08:50.138-0:08:50.404	IT2	0.246589	8	0.923782
Trial 1	M1-2	C-P	M	0:08:50.404-0:08:50.670	IT2	0.119055	8	0.446011
Trial 1	M1-2	C-P	M	0:08:50.670-0:08:50.936	IT2	0.0672355	8	0.25188
[truncated: 121,364 more rows]

## Sheet: Day 3
Raw velocity data, extracted via ethovision, which is fed to R source code 1 to detect and extract darts, and to produce velocity traces
Showing Data from Acquisition Day 3 for all animals in Experiment 4
Used to calculate Darts/minute as seen in Figure 8-figure supplement 1
Trial	Animal	Group	Sex	TimeStamp	StimPeriod	Distance	Samples	Velocity
Trial 1	M1-2	C-P	M	Start-0:00:00.266	BL	-	0	-
Trial 1	M1-2	C-P	M	0:00:00.266-0:00:00.532	BL	-	0	-
Trial 1	M1-2	C-P	M	0:00:00.532-0:00:00.798	BL	-	0	-
Trial 1	M1-2	C-P	M	0:00:00.798-0:00:01.064	BL	-	0	-
Trial 1	M1-2	C-P	M	0:00:01.064-0:00:01.330	BL	-	0	-
Trial 1	M1-2	C-P	M	0:00:01.330-0:00:01.596	BL	-	0	-
Trial 1	M1-2	C-P	M	0:00:01.596-0:00:01.862	BL	-	0	-
Trial 1	M1-2	C-P	M	0:00:01.862-0:00:02.128	BL	-	0	-
Trial 1	M1-2	C-P	M	0:00:02.128-0:00:02.394	BL	-	0	-
Trial 1	M1-2	C-P	M	0:00:02.394-0:00:02.660	BL	-	0	-
Trial 1	M1-2	C-P	M	0:00:02.660-0:00:02.926	BL	-	0	-
Trial 1	M1-2	C-P	M	0:00:02.926-0:00:03.192	BL	-	0	-
Trial 1	M1-2	C-P	M	0:00:03.192-0:00:03.458	BL	1.28047	8	4.79697
Trial 1	M1-2	C-P	M	0:00:03.458-0:00:03.724	BL	2.75825	8	10.3331
Trial 1	M1-2	C-P	M	0:00:03.724-0:00:03.990	BL	1.48322	8	5.55651
Trial 1	M1-2	C-P	M	0:00:03.990-0:00:04.256	BL	4.9325	8	18.4785
Trial 1	M1-2	C-P	M	0:00:04.256-0:00:04.522	BL	6.33866	8	23.7461
Trial 1	M1-2	C-P	M	0:00:04.522-0:00:04.788	BL	2.57898	8	9.66142
Trial 1	M1-2	C-P	M	0:00:04.788-0:00:05.054	BL	3.78275	8	14.1712
Trial 1	M1-2	C-P	M	0:00:05.054-0:00:05.320	BL	0.843863	8	3.16133
Trial 1	M1-2	C-P	M	0:00:05.320-0:00:05.586	BL	0.350138	8	1.31171
Trial 1	M1-2	C-P	M	0:00:05.586-0:00:05.852	BL	0.310676	8	1.16387
Trial 1	M1-2	C-P	M	0:00:05.852-0:00:06.118	BL	0.760454	8	2.84885
Trial 1	M1-2	C-P	M	0:00:06.118-0:00:06.384	BL	0.89211	8	3.34207
Trial 1	M1-2	C-P	M	0:00:06.384-0:00:06.650	BL	0.561367	8	2.10301
Trial 1	M1-2	C-P	M	0:00:06.650-0:00:06.916	BL	4.177	8	15.6481
Trial 1	M1-2	C-P	M	0:00:06.916-0:00:07.182	BL	4.76859	8	17.8643
Trial 1	M1-2	C-P	M	0:00:07.182-0:00:07.448	BL	1.23813	8	4.63833
Trial 1	M1-2	C-P	M	0:00:07.448-0:00:07.714	BL	1.39734	8	5.23482
Trial 1	M1-2	C-P	M	0:00:07.714-0:00:07.980	BL	1.5297	8	5.73065
Trial 1	M1-2	C-P	M	0:00:07.980-0:00:08.246	BL	0.994332	8	3.72502
Trial 1	M1-2	C-P	M	0:00:08.246-0:00:08.512	BL	0.573454	8	2.1483
Trial 1	M1-2	C-P	M	0:00:08.512-0:00:08.778	BL	0.452931	8	1.69679
Trial 1	M1-2	C-P	M	0:00:08.778-0:00:09.044	BL	0.818267	8	3.06545
Trial 1	M1-2	C-P	M	0:00:09.044-0:00:09.310	BL	0.295573	8	1.10728
Trial 1	M1-2	C-P	M	0:00:09.310-0:00:09.576	BL	0.76778	7	3.28721
Trial 1	M1-2	C-P	M	0:00:09.576-0:00:09.842	BL	0.826534	8	3.09642
Trial 1	M1-2	C-P	M	0:00:09.842-0:00:10.108	BL	0.647692	8	2.42642
Trial 1	M1-2	C-P	M	0:00:10.108-0:00:10.374	BL	0.368283	8	1.37968
Trial 1	M1-2	C-P	M	0:00:10.374-0:00:10.640	BL	0.267659	8	1.00271
Trial 1	M1-2	C-P	M	0:00:10.640-0:00:10.906	BL	0.812089	8	3.04229
Trial 1	M1-2	C-P	M	0:00:10.906-0:00:11.172	BL	0.716541	8	2.68435
Trial 1	M1-2	C-P	M	0:00:11.172-0:00:11.438	BL	0.610112	8	2.28563
Trial 1	M1-2	C-P	M	0:00:11.438-0:00:11.704	BL	0.536895	8	2.01133
Trial 1	M1-2	C-P	M	0:00:11.704-0:00:11.970	BL	0.57051	8	2.13728
Trial 1	M1-2	C-P	M	0:00:11.970-0:00:12.236	BL	0.557651	8	2.0891
Trial 1	M1-2	C-P	M	0:00:12.236-0:00:12.502	BL	0.268734	8	1.00675
Trial 1	M1-2	C-P	M	0:00:12.502-0:00:12.768	BL	0.340531	8	1.27571
Trial 1	M1-2	C-P	M	0:00:12.768-0:00:13.034	BL	0.262633	8	0.98389
Trial 1	M1-2	C-P	M	0:00:13.034-0:00:13.300	BL	0.314675	8	1.17885
Trial 1	M1-2	C-P	M	0:00:13.300-0:00:13.566	BL	0.590432	8	2.2119
Trial 1	M1-2	C-P	M	0:00:13.566-0:00:13.832	BL	0.893701	8	3.34802
Trial 1	M1-2	C-P	M	0:00:13.832-0:00:14.098	BL	0.597231	8	2.23737
Trial 1	M1-2	C-P	M	0:00:14.098-0:00:14.364	BL	1.11407	8	4.17357
Trial 1	M1-2	C-P	M	0:00:14.364-0:00:14.630	BL	0.612884	8	2.29603
Trial 1	M1-2	C-P	M	0:00:14.630-0:00:14.896	BL	0.594306	8	2.22642
Trial 1	M1-2	C-P	M	0:00:14.896-0:00:15.162	BL	0.773617	8	2.89817
Trial 1	M1-2	C-P	M	0:00:15.162-0:00:15.428	BL	1.7182	8	6.4368
Trial 1	M1-2	C-P	M	0:00:15.428-0:00:15.694	BL	2.23362	8	8.36768
Trial 1	M1-2	C-P	M	0:00:15.694-0:00:15.960	BL	3.67232	8	13.7574
Trial 1	M1-2	C-P	M	0:00:15.960-0:00:16.226	BL	4.30977	8	16.1454
Trial 1	M1-2	C-P	M	0:00:16.226-0:00:16.492	BL	3.12888	8	11.7216
Trial 1	M1-2	C-P	M	0:00:16.492-0:00:16.758	BL	2.32991	8	8.72845
Trial 1	M1-2	C-P	M	0:00:16.758-0:00:17.024	BL	0.811286	8	3.03927
Trial 1	M1-2	C-P	M	0:00:17.024-0:00:17.290	BL	0.549707	8	2.05934
Trial 1	M1-2	C-P	M	0:00:17.290-0:00:17.556	BL	0.895388	8	3.35435
Trial 1	M1-2	C-P	M	0:00:17.556-0:00:17.822	BL	1.50319	8	5.63136
Trial 1	M1-2	C-P	M	0:00:17.822-0:00:18.088	BL	1.30996	8	4.90743
Trial 1	M1-2	C-P	M	0:00:18.088-0:00:18.354	BL	0.191465	8	0.717275
Trial 1	M1-2	C-P	M	0:00:18.354-0:00:18.620	BL	2.83067	8	10.6044
Trial 1	M1-2	C-P	M	0:00:18.620-0:00:18.886	BL	0.847326	8	3.17428
Trial 1	M1-2	C-P	M	0:00:18.886-0:00:19.152	BL	0.462226	7	1.97899
Trial 1	M1-2	C-P	M	0:00:19.152-0:00:19.418	BL	0.421468	8	1.57893
Trial 1	M1-2	C-P	M	0:00:19.418-0:00:19.684	BL	0.53596	8	2.00783
Trial 1	M1-2	C-P	M	0:00:19.684-0:00:19.950	BL	0.576286	8	2.15891
Trial 1	M1-2	C-P	M	0:00:19.950-0:00:20.216	BL	0.358068	8	1.34141
Trial 1	M1-2	C-P	M	0:00:20.216-0:00:20.482	BL	0.399387	8	1.4962
Trial 1	M1-2	C-P	M	0:00:20.482-0:00:20.748	BL	0.377445	8	1.41401
Trial 1	M1-2	C-P	M	0:00:20.748-0:00:21.014	BL	0.25566	8	0.957761
Trial 1	M1-2	C-P	M	0:00:21.014-0:00:21.280	BL	0.194851	8	0.729959
Trial 1	M1-2	C-P	M	0:00:21.280-0:00:21.546	BL	0.1215	8	0.455169
Trial 1	M1-2	C-P	M	0:00:21.546-0:00:21.812	BL	0.0867979	8	0.325164
Trial 1	M1-2	C-P	M	0:00:21.812-0:00:22.078	BL	0.782522	8	2.93152
Trial 1	M1-2	C-P	M	0:00:22.078-0:00:22.344	BL	0.220295	8	0.825279
Trial 1	M1-2	C-P	M	0:00:22.344-0:00:22.610	BL	0.258558	8	0.968621
Trial 1	M1-2	C-P	M	0:00:22.610-0:00:22.876	BL	0.413422	8	1.54878
Trial 1	M1-2	C-P	M	0:00:22.876-0:00:23.142	BL	0.298927	8	1.11985
Trial 1	M1-2	C-P	M	0:00:23.142-0:00:23.408	BL	0.485821	8	1.82001
Trial 1	M1-2	C-P	M	0:00:23.408-0:00:23.674	BL	0.586624	8	2.19764
Trial 1	M1-2	C-P	M	0:00:23.674-0:00:23.940	BL	0.265597	8	0.994993
Trial 1	M1-2	C-P	M	0:00:23.940-0:00:24.206	BL	0.2075	8	0.777346
Trial 1	M1-2	C-P	M	0:00:24.206-0:00:24.472	BL	0.105128	8	0.393834
Trial 1	M1-2	C-P	M	0:00:24.472-0:00:24.738	BL	0.126776	8	0.474933
Trial 1	M1-2	C-P	M	0:00:24.738-0:00:25.004	BL	0.30282	8	1.13444
Trial 1	M1-2	C-P	M	0:00:25.004-0:00:25.270	BL	0.360043	8	1.34881
Trial 1	M1-2	C-P	M	0:00:25.270-0:00:25.536	BL	0.275642	8	1.03262
Trial 1	M1-2	C-P	M	0:00:25.536-0:00:25.802	BL	0.13867	8	0.51949
Trial 1	M1-2	C-P	M	0:00:25.802-0:00:26.068	BL	0.138681	8	0.519537
Trial 1	M1-2	C-P	M	0:00:26.068-0:00:26.334	BL	0.104486	8	0.391432
Trial 1	M1-2	C-P	M	0:00:26.334-0:00:26.600	BL	0.0711187	8	0.26643
Trial 1	M1-2	C-P	M	0:00:26.600-0:00:26.866	BL	0.0761543	8	0.285293
Trial 1	M1-2	C-P	M	0:00:26.866-0:00:27.132	BL	0.0608782	8	0.228065
Trial 1	M1-2	C-P	M	0:00:27.132-0:00:27.398	BL	0.0370923	8	0.138957
Trial 1	M1-2	C-P	M	0:00:27.398-0:00:27.664	BL	0.133238	8	0.49914
Trial 1	M1-2	C-P	M	0:00:27.664-0:00:27.930	BL	0.147063	8	0.550939
Trial 1	M1-2	C-P	M	0:00:27.930-0:00:28.196	BL	0.152973	8	0.573075
Trial 1	M1-2	C-P	M	0:00:28.196-0:00:28.462	BL	0.472991	8	1.77194
Trial 1	M1-2	C-P	M	0:00:28.462-0:00:28.728	BL	0.204354	7	0.87492
Trial 1	M1-2	C-P	M	0:00:28.728-0:00:28.994	BL	0.560605	8	2.10017
Trial 1	M1-2	C-P	M	0:00:28.994-0:00:29.260	BL	0.627858	8	2.35213
Trial 1	M1-2	C-P	M	0:00:29.260-0:00:29.526	BL	0.638982	8	2.39381
Trial 1	M1-2	C-P	M	0:00:29.526-0:00:29.792	BL	0.435953	8	1.63319
Trial 1	M1-2	C-P	M	0:00:29.792-0:00:30.058	BL	0.497909	8	1.86529
Trial 1	M1-2	C-P	M	0:00:30.058-0:00:30.324	BL	0.275112	8	1.03064
Trial 1	M1-2	C-P	M	0:00:30.324-0:00:30.590	BL	0.184331	8	0.690548
Trial 1	M1-2	C-P	M	0:00:30.590-0:00:30.856	BL	0.281461	8	1.05443
Trial 1	M1-2	C-P	M	0:00:30.856-0:00:31.122	BL	0.340281	8	1.27478
Trial 1	M1-2	C-P	M	0:00:31.122-0:00:31.388	BL	0.490944	8	1.8392
Trial 1	M1-2	C-P	M	0:00:31.388-0:00:31.654	BL	0.298332	8	1.11763
Trial 1	M1-2	C-P	M	0:00:31.654-0:00:31.920	BL	0.639881	8	2.39714
Trial 1	M1-2	C-P	M	0:00:31.920-0:00:32.186	BL	0.682392	8	2.55641
Trial 1	M1-2	C-P	M	0:00:32.186-0:00:32.452	BL	0.965028	8	3.61524
Trial 1	M1-2	C-P	M	0:00:32.452-0:00:32.718	BL	0.792722	8	2.96973
Trial 1	M1-2	C-P	M	0:00:32.718-0:00:32.984	BL	0.222953	8	0.835241
Trial 1	M1-2	C-P	M	0:00:32.984-0:00:33.250	BL	0.268447	8	1.00567
Trial 1	M1-2	C-P	M	0:00:33.250-0:00:33.516	BL	0.278946	8	1.04501
Trial 1	M1-2	C-P	M	0:00:33.516-0:00:33.782	BL	0.112224	8	0.420417
Trial 1	M1-2	C-P	M	0:00:33.782-0:00:34.048	BL	0.0543616	8	0.20365
Trial 1	M1-2	C-P	M	0:00:34.048-0:00:34.314	BL	0.475582	8	1.78165
Trial 1	M1-2	C-P	M	0:00:34.314-0:00:34.580	BL	0.368464	8	1.38036
Trial 1	M1-2	C-P	M	0:00:34.580-0:00:34.846	BL	0.397141	8	1.48779
Trial 1	M1-2	C-P	M	0:00:34.846-0:00:35.112	BL	0.184434	8	0.690936
Trial 1	M1-2	C-P	M	0:00:35.112-0:00:35.378	BL	0.200515	8	0.751179
Trial 1	M1-2	C-P	M	0:00:35.378-0:00:35.644	BL	0.192526	8	0.721249
Trial 1	M1-2	C-P	M	0:00:35.644-0:00:35.910	BL	0.0555705	8	0.208181
Trial 1	M1-2	C-P	M	0:00:35.910-0:00:36.176	BL	0.111565	8	0.41795
Trial 1	M1-2	C-P	M	0:00:36.176-0:00:36.442	BL	0.153359	8	0.574517
Trial 1	M1-2	C-P	M	0:00:36.442-0:00:36.708	BL	0.324334	8	1.21504
Trial 1	M1-2	C-P	M	0:00:36.708-0:00:36.974	BL	0.231529	8	0.867363
Trial 1	M1-2	C-P	M	0:00:36.974-0:00:37.240	BL	0.0987572	8	0.36997
Trial 1	M1-2	C-P	M	0:00:37.240-0:00:37.506	BL	0.122526	8	0.459013
Trial 1	M1-2	C-P	M	0:00:37.506-0:00:37.772	BL	0.0811479	8	0.304
Trial 1	M1-2	C-P	M	0:00:37.772-0:00:38.038	BL	0.220853	7	0.945565
Trial 1	M1-2	C-P	M	0:00:38.038-0:00:38.304	BL	0.363916	8	1.36331
Trial 1	M1-2	C-P	M	0:00:38.304-0:00:38.570	BL	1.23153	8	4.61362
Trial 1	M1-2	C-P	M	0:00:38.570-0:00:38.836	BL	1.99673	8	7.48024
Trial 1	M1-2	C-P	M	0:00:38.836-0:00:39.102	BL	0.740506	8	2.77415
Trial 1	M1-2	C-P	M	0:00:39.102-0:00:39.368	BL	1.02052	8	3.82311
Trial 1	M1-2	C-P	M	0:00:39.368-0:00:39.634	BL	3.54312	8	13.2734
Trial 1	M1-2	C-P	M	0:00:39.634-0:00:39.900	BL	3.91354	8	14.6611
Trial 1	M1-2	C-P	M	0:00:39.900-0:00:40.166	BL	1.39533	8	5.22724
Trial 1	M1-2	C-P	M	0:00:40.166-0:00:40.432	BL	0.697036	8	2.61127
Trial 1	M1-2	C-P	M	0:00:40.432-0:00:40.698	BL	0.753254	8	2.82187
Trial 1	M1-2	C-P	M	0:00:40.698-0:00:40.964	BL	2.47572	8	9.27469
Trial 1	M1-2	C-P	M	0:00:40.964-0:00:41.230	BL	2.27233	8	8.51271
Trial 1	M1-2	C-P	M	0:00:41.230-0:00:41.496	BL	1.69031	8	6.3323
Trial 1	M1-2	C-P	M	0:00:41.496-0:00:41.762	BL	0.625297	8	2.34252
Trial 1	M1-2	C-P	M	0:00:41.762-0:00:42.028	BL	0.604635	8	2.2651
Trial 1	M1-2	C-P	M	0:00:42.028-0:00:42.294	BL	0.580187	8	2.17352
Trial 1	M1-2	C-P	M	0:00:42.294-0:00:42.560	BL	0.259189	8	0.970986
Trial 1	M1-2	C-P	M	0:00:42.560-0:00:42.826	BL	0.310457	8	1.16304
Trial 1	M1-2	C-P	M	0:00:42.826-0:00:43.092	BL	0.144427	8	0.541057
Trial 1	M1-2	C-P	M	0:00:43.092-0:00:43.358	BL	0.119272	8	0.446819
Trial 1	M1-2	C-P	M	0:00:43.358-0:00:43.624	BL	0.158354	8	0.59324
Trial 1	M1-2	C-P	M	0:00:43.624-0:00:43.890	BL	0.0943663	8	0.353519
Trial 1	M1-2	C-P	M	0:00:43.890-0:00:44.156	BL	0.12238	8	0.458466
Trial 1	M1-2	C-P	M	0:00:44.156-0:00:44.422	BL	0.363798	8	1.36288
Trial 1	M1-2	C-P	M	0:00:44.422-0:00:44.688	BL	0.403588	8	1.51195
Trial 1	M1-2	C-P	M	0:00:44.688-0:00:44.954	BL	0.434874	8	1.62915
Trial 1	M1-2	C-P	M	0:00:44.954-0:00:45.220	BL	0.346893	8	1.29955
Trial 1	M1-2	C-P	M	0:00:45.220-0:00:45.486	BL	0.234853	8	0.879817
Trial 1	M1-2	C-P	M	0:00:45.486-0:00:45.752	BL	0.625898	8	2.34477
Trial 1	M1-2	C-P	M	0:00:45.752-0:00:46.018	BL	0.605539	8	2.2685
Trial 1	M1-2	C-P	M	0:00:46.018-0:00:46.284	BL	0.664927	8	2.49099
Trial 1	M1-2	C-P	M	0:00:46.284-0:00:46.550	BL	1.40365	8	5.25842
Trial 1	M1-2	C-P	M	0:00:46.550-0:00:46.816	BL	2.29942	8	8.61418
Trial 1	M1-2	C-P	M	0:00:46.816-0:00:47.082	BL	0.545937	8	2.04521
Trial 1	M1-2	C-P	M	0:00:47.082-0:00:47.348	BL	0.668379	8	2.5039
Trial 1	M1-2	C-P	M	0:00:47.348-0:00:47.614	BL	3.13274	7	13.4126
Trial 1	M1-2	C-P	M	0:00:47.614-0:00:47.880	BL	0.550803	8	2.06345
Trial 1	M1-2	C-P	M	0:00:47.880-0:00:48.146	BL	0.384947	8	1.44211
Trial 1	M1-2	C-P	M	0:00:48.146-0:00:48.412	BL	0.224325	8	0.840375
Trial 1	M1-2	C-P	M	0:00:48.412-0:00:48.678	BL	0.143424	8	0.537301
Trial 1	M1-2	C-P	M	0:00:48.678-0:00:48.944	BL	0.41737	8	1.56358
Trial 1	M1-2	C-P	M	0:00:48.944-0:00:49.210	BL	0.526893	8	1.97387
Trial 1	M1-2	C-P	M	0:00:49.210-0:00:49.476	BL	0.752279	8	2.81823
Trial 1	M1-2	C-P	M	0:00:49.476-0:00:49.742	BL	0.613302	8	2.29758
Trial 1	M1-2	C-P	M	0:00:49.742-0:00:50.008	BL	0.726056	8	2.71999
Trial 1	M1-2	C-P	M	0:00:50.008-0:00:50.274	BL	0.55668	8	2.08547
Trial 1	M1-2	C-P	M	0:00:50.274-0:00:50.540	BL	0.715515	8	2.68051
Trial 1	M1-2	C-P	M	0:00:50.540-0:00:50.806	BL	0.76321	8	2.85916
Trial 1	M1-2	C-P	M	0:00:50.806-0:00:51.072	BL	1.56978	8	5.88077
Trial 1	M1-2	C-P	M	0:00:51.072-0:00:51.338	BL	1.05226	8	3.94202
Trial 1	M1-2	C-P	M	0:00:51.338-0:00:51.604	BL	0.774829	8	2.90271
Trial 1	M1-2	C-P	M	0:00:51.604-0:00:51.870	BL	0.589796	8	2.20953
Trial 1	M1-2	C-P	M	0:00:51.870-0:00:52.136	BL	1.20117	8	4.4999
Trial 1	M1-2	C-P	M	0:00:52.136-0:00:52.402	BL	2.12857	8	7.97414
Trial 1	M1-2	C-P	M	0:00:52.402-0:00:52.668	BL	0.569545	8	2.13365
Trial 1	M1-2	C-P	M	0:00:52.668-0:00:52.934	BL	0.59357	8	2.22365
Trial 1	M1-2	C-P	M	0:00:52.934-0:00:53.200	BL	2.73778	8	10.2564
Trial 1	M1-2	C-P	M	0:00:53.200-0:00:53.466	BL	3.7435	8	14.0241
Trial 1	M1-2	C-P	M	0:00:53.466-0:00:53.732	BL	3.35561	8	12.5709
Trial 1	M1-2	C-P	M	0:00:53.732-0:00:53.998	BL	1.49607	8	5.60466
Trial 1	M1-2	C-P	M	0:00:53.998-0:00:54.264	BL	3.20982	8	12.0248
Trial 1	M1-2	C-P	M	0:00:54.264-0:00:54.530	BL	1.86546	8	6.98848
Trial 1	M1-2	C-P	M	0:00:54.530-0:00:54.796	BL	1.59709	8	5.9831
Trial 1	M1-2	C-P	M	0:00:54.796-0:00:55.062	BL	2.9596	8	11.0874
Trial 1	M1-2	C-P	M	0:00:55.062-0:00:55.328	BL	6.19169	8	23.1958
Trial 1	M1-2	C-P	M	0:00:55.328-0:00:55.594	BL	4.69833	8	17.6011
Trial 1	M1-2	C-P	M	0:00:55.594-0:00:55.860	BL	3.63238	8	13.6078
Trial 1	M1-2	C-P	M	0:00:55.860-0:00:56.126	BL	1.14477	8	4.28862
Trial 1	M1-2	C-P	M	0:00:56.126-0:00:56.392	BL	3.25018	8	12.176
Trial 1	M1-2	C-P	M	0:00:56.392-0:00:56.658	BL	1.4699	8	5.50669
Trial 1	M1-2	C-P	M	0:00:56.658-0:00:56.924	BL	0.268159	8	1.00459
Trial 1	M1-2	C-P	M	0:00:56.924-0:00:57.190	BL	0.234639	7	1.00459
Trial 1	M1-2	C-P	M	0:00:57.190-0:00:57.456	BL	0.268159	8	1.00459
Trial 1	M1-2	C-P	M	0:00:57.456-0:00:57.722	BL	0.268159	8	1.00459
Trial 1	M1-2	C-P	M	0:00:57.722-0:00:57.988	BL	0.268159	8	1.00459
Trial 1	M1-2	C-P	M	0:00:57.988-0:00:58.254	BL	0.268159	8	1.00459
Trial 1	M1-2	C-P	M	0:00:58.254-0:00:58.520	BL	0.268159	8	1.00459
Trial 1	M1-2	C-P	M	0:00:58.520-0:00:58.786	BL	0.268159	8	1.00459
Trial 1	M1-2	C-P	M	0:00:58.786-0:00:59.052	BL	0.268159	8	1.00459
Trial 1	M1-2	C-P	M	0:00:59.052-0:00:59.318	BL	0.268159	8	1.00459
Trial 1	M1-2	C-P	M	0:00:59.318-0:00:59.584	BL	0.268159	8	1.00459
Trial 1	M1-2	C-P	M	0:00:59.584-0:00:59.850	BL	0.268159	8	1.00459
Trial 1	M1-2	C-P	M	0:00:59.850-0:01:00.116	BL	0.268159	8	1.00459
Trial 1	M1-2	C-P	M	0:01:00.116-0:01:00.382	BL	0.268159	8	1.00459
Trial 1	M1-2	C-P	M	0:01:00.382-0:01:00.648	BL	0.268159	8	1.00459
Trial 1	M1-2	C-P	M	0:01:00.648-0:01:00.914	BL	0.268159	8	1.00459
Trial 1	M1-2	C-P	M	0:01:00.914-0:01:01.180	BL	0.268159	8	1.00459
Trial 1	M1-2	C-P	M	0:01:01.180-0:01:01.446	BL	0.268159	8	1.00459
Trial 1	M1-2	C-P	M	0:01:01.446-0:01:01.712	BL	0.268159	8	1.00459
Trial 1	M1-2	C-P	M	0:01:01.712-0:01:01.978	BL	0.814863	8	3.05269
Trial 1	M1-2	C-P	M	0:01:01.978-0:01:02.244	BL	1.53215	8	5.73981
Trial 1	M1-2	C-P	M	0:01:02.244-0:01:02.510	BL	2.12311	8	7.95367
Trial 1	M1-2	C-P	M	0:01:02.510-0:01:02.776	BL	3.52596	8	13.2091
Trial 1	M1-2	C-P	M	0:01:02.776-0:01:03.042	BL	2.90757	8	10.8925
Trial 1	M1-2	C-P	M	0:01:03.042-0:01:03.308	BL	1.19069	8	4.46064
Trial 1	M1-2	C-P	M	0:01:03.308-0:01:03.574	BL	0.97222	8	3.64217
Trial 1	M1-2	C-P	M	0:01:03.574-0:01:03.840	BL	1.65728	8	6.20854
Trial 1	M1-2	C-P	M	0:01:03.840-0:01:04.106	BL	3.65959	8	13.7097
Trial 1	M1-2	C-P	M	0:01:04.106-0:01:04.372	BL	3.51374	8	13.1633
Trial 1	M1-2	C-P	M	0:01:04.372-0:01:04.638	BL	1.75442	8	6.57253
Trial 1	M1-2	C-P	M	0:01:04.638-0:01:04.904	BL	0.295259	8	1.10612
Trial 1	M1-2	C-P	M	0:01:04.904-0:01:05.170	BL	0.196704	8	0.736896
Trial 1	M1-2	C-P	M	0:01:05.170-0:01:05.436	BL	1.43938	8	5.39229
Trial 1	M1-2	C-P	M	0:01:05.436-0:01:05.702	BL	2.94212	8	11.0219
Trial 1	M1-2	C-P	M	0:01:05.702-0:01:05.968	BL	1.45384	8	5.44645
Trial 1	M1-2	C-P	M	0:01:05.968-0:01:06.234	BL	0.716983	8	2.686
Trial 1	M1-2	C-P	M	0:01:06.234-0:01:06.500	BL	0.735167	8	2.75412
Trial 1	M1-2	C-P	M	0:01:06.500-0:01:06.766	BL	0.292803	7	1.25361
Trial 1	M1-2	C-P	M	0:01:06.766-0:01:07.032	BL	0.059819	8	0.224096
Trial 1	M1-2	C-P	M	0:01:07.032-0:01:07.298	BL	0.278113	8	1.04188
Trial 1	M1-2	C-P	M	0:01:07.298-0:01:07.564	BL	0.294035	8	1.10153
Trial 1	M1-2	C-P	M	0:01:07.564-0:01:07.830	BL	0.121122	8	0.453752
Trial 1	M1-2	C-P	M	0:01:07.830-0:01:08.096	BL	0.434456	8	1.62758
Trial 1	M1-2	C-P	M	0:01:08.096-0:01:08.362	BL	0.339848	8	1.27315
Trial 1	M1-2	C-P	M	0:01:08.362-0:01:08.628	BL	0.831597	8	3.1154
Trial 1	M1-2	C-P	M	0:01:08.628-0:01:08.894	BL	0.298478	8	1.11818
Trial 1	M1-2	C-P	M	0:01:08.894-0:01:09.160	BL	0.41312	8	1.54765
Trial 1	M1-2	C-P	M	0:01:09.160-0:01:09.426	BL	0.267945	8	1.00379
Trial 1	M1-2	C-P	M	0:01:09.426-0:01:09.692	BL	0.581804	8	2.17958
Trial 1	M1-2	C-P	M	0:01:09.692-0:01:09.958	BL	0.452474	8	1.69507
Trial 1	M1-2	C-P	M	0:01:09.958-0:01:10.224	BL	0.569753	8	2.13444
Trial 1	M1-2	C-P	M	0:01:10.224-0:01:10.490	BL	0.210366	8	0.788083
Trial 1	M1-2	C-P	M	0:01:10.490-0:01:10.756	BL	0.675136	8	2.52921
Trial 1	M1-2	C-P	M	0:01:10.756-0:01:11.022	BL	0.922419	8	3.45562
Trial 1	M1-2	C-P	M	0:01:11.022-0:01:11.288	BL	1.05792	8	3.96324
Trial 1	M1-2	C-P	M	0:01:11.288-0:01:11.554	BL	0.898451	8	3.36584
Trial 1	M1-2	C-P	M	0:01:11.554-0:01:11.820	BL	0.864447	8	3.23843
Trial 1	M1-2	C-P	M	0:01:11.820-0:01:12.086	BL	0.79573	8	2.98101
Trial 1	M1-2	C-P	M	0:01:12.086-0:01:12.352	BL	0.808793	8	3.02996
Trial 1	M1-2	C-P	M	0:01:12.352-0:01:12.618	BL	1.3584	8	5.08889
Trial 1	M1-2	C-P	M	0:01:12.618-0:01:12.884	BL	1.54925	8	5.80389
Trial 1	M1-2	C-P	M	0:01:12.884-0:01:13.150	BL	0.802104	8	3.00487
Trial 1	M1-2	C-P	M	0:01:13.150-0:01:13.416	BL	0.295937	8	1.10865
Trial 1	M1-2	C-P	M	0:01:13.416-0:01:13.682	BL	0.0547963	8	0.205281
Trial 1	M1-2	C-P	M	0:01:13.682-0:01:13.948	BL	0.237906	8	0.891255
Trial 1	M1-2	C-P	M	0:01:13.948-0:01:14.214	BL	1.38945	8	5.20524
Trial 1	M1-2	C-P	M	0:01:14.214-0:01:14.480	BL	0.839004	8	3.14311
Trial 1	M1-2	C-P	M	0:01:14.480-0:01:14.746	BL	0.489669	8	1.83442
Trial 1	M1-2	C-P	M	0:01:14.746-0:01:15.012	BL	0.124578	8	0.466706
Trial 1	M1-2	C-P	M	0:01:15.012-0:01:15.278	BL	0.0600121	8	0.22482
Trial 1	M1-2	C-P	M	0:01:15.278-0:01:15.544	BL	0.061562	8	0.230628
Trial 1	M1-2	C-P	M	0:01:15.544-0:01:15.810	BL	0.0651114	8	0.243922
Trial 1	M1-2	C-P	M	0:01:15.810-0:01:16.076	BL	0.391208	7	1.67493
Trial 1	M1-2	C-P	M	0:01:16.076-0:01:16.342	BL	0.385107	8	1.44272
Trial 1	M1-2	C-P	M	0:01:16.342-0:01:16.608	BL	0.481491	8	1.80378
Trial 1	M1-2	C-P	M	0:01:16.608-0:01:16.874	BL	0.230199	8	0.862384
Trial 1	M1-2	C-P	M	0:01:16.874-0:01:17.140	BL	0.166177	8	0.622538
Trial 1	M1-2	C-P	M	0:01:17.140-0:01:17.406	BL	0.424139	8	1.58893
Trial 1	M1-2	C-P	M	0:01:17.406-0:01:17.672	BL	1.63661	8	6.13119
Trial 1	M1-2	C-P	M	0:01:17.672-0:01:17.938	BL	1.7161	8	6.42891
Trial 1	M1-2	C-P	M	0:01:17.938-0:01:18.204	BL	2.57464	8	9.64526
Trial 1	M1-2	C-P	M	0:01:18.204-0:01:18.470	BL	1.41704	8	5.30862
Trial 1	M1-2	C-P	M	0:01:18.470-0:01:18.736	BL	2.08591	8	7.81436
Trial 1	M1-2	C-P	M	0:01:18.736-0:01:19.002	BL	0.584429	8	2.18942
Trial 1	M1-2	C-P	M	0:01:19.002-0:01:19.268	BL	2.41264	8	9.03834
Trial 1	M1-2	C-P	M	0:01:19.268-0:01:19.534	BL	1.32556	8	4.96585
Trial 1	M1-2	C-P	M	0:01:19.534-0:01:19.800	BL	0.961594	8	3.60238
Trial 1	M1-2	C-P	M	0:01:19.800-0:01:20.066	BL	2.99504	8	11.2202
Trial 1	M1-2	C-P	M	0:01:20.066-0:01:20.332	BL	4.4376	8	16.6244
Trial 1	M1-2	C-P	M	0:01:20.332-0:01:20.598	BL	3.2398	8	12.1371
Trial 1	M1-2	C-P	M	0:01:20.598-0:01:20.864	BL	0.641751	8	2.40415
Trial 1	M1-2	C-P	M	0:01:20.864-0:01:21.130	BL	0.70453	8	2.63935
Trial 1	M1-2	C-P	M	0:01:21.130-0:01:21.396	BL	0.978012	8	3.66386
Trial 1	M1-2	C-P	M	0:01:21.396-0:01:21.662	BL	1.99136	8	7.46016
Trial 1	M1-2	C-P	M	0:01:21.662-0:01:21.928	BL	0.918621	8	3.44137
Trial 1	M1-2	C-P	M	0:01:21.928-0:01:22.194	BL	0.310836	8	1.16447
Trial 1	M1-2	C-P	M	0:01:22.194-0:01:22.460	BL	0.315656	8	1.18253
Trial 1	M1-2	C-P	M	0:01:22.460-0:01:22.726	BL	0.216791	8	0.812153
Trial 1	M1-2	C-P	M	0:01:22.726-0:01:22.992	BL	0.387375	8	1.45121
Trial 1	M1-2	C-P	M	0:01:22.992-0:01:23.258	BL	0.17315	8	0.64866
Trial 1	M1-2	C-P	M	0:01:23.258-0:01:23.524	BL	0.248259	8	0.93004
Trial 1	M1-2	C-P	M	0:01:23.524-0:01:23.790	BL	0.182992	8	0.685531
Trial 1	M1-2	C-P	M	0:01:23.790-0:01:24.056	BL	0.454139	8	1.70131
Trial 1	M1-2	C-P	M	0:01:24.056-0:01:24.322	BL	0.2344	8	0.87812
Trial 1	M1-2	C-P	M	0:01:24.322-0:01:24.588	BL	0.111491	8	0.417677
Trial 1	M1-2	C-P	M	0:01:24.588-0:01:24.854	BL	0.309802	8	1.1606
Trial 1	M1-2	C-P	M	0:01:24.854-0:01:25.120	BL	0.349504	8	1.30934
Trial 1	M1-2	C-P	M	0:01:25.120-0:01:25.386	BL	0.375426	8	1.40644
Trial 1	M1-2	C-P	M	0:01:25.386-0:01:25.652	BL	0.337578	7	1.44532
Trial 1	M1-2	C-P	M	0:01:25.652-0:01:25.918	BL	0.276891	8	1.03732
Trial 1	M1-2	C-P	M	0:01:25.918-0:01:26.184	BL	0.249523	8	0.934771
Trial 1	M1-2	C-P	M	0:01:26.184-0:01:26.450	BL	0.161	8	0.603146
Trial 1	M1-2	C-P	M	0:01:26.450-0:01:26.716	BL	0.220632	8	0.826543
Trial 1	M1-2	C-P	M	0:01:26.716-0:01:26.982	BL	0.44213	8	1.65632
Trial 1	M1-2	C-P	M	0:01:26.982-0:01:27.248	BL	0.615914	8	2.30737
Trial 1	M1-2	C-P	M	0:01:27.248-0:01:27.514	BL	0.185004	8	0.693072
Trial 1	M1-2	C-P	M	0:01:27.514-0:01:27.780	BL	0.35753	8	1.33939
Trial 1	M1-2	C-P	M	0:01:27.780-0:01:28.046	BL	0.356076	8	1.33395
Trial 1	M1-2	C-P	M	0:01:28.046-0:01:28.312	BL	0.547083	8	2.0495
Trial 1	M1-2	C-P	M	0:01:28.312-0:01:28.578	BL	0.296053	8	1.10909
Trial 1	M1-2	C-P	M	0:01:28.578-0:01:28.844	BL	0.224188	8	0.839863
Trial 1	M1-2	C-P	M	0:01:28.844-0:01:29.110	BL	0.25266	8	0.946527
Trial 1	M1-2	C-P	M	0:01:29.110-0:01:29.376	BL	0.153202	8	0.573934
Trial 1	M1-2	C-P	M	0:01:29.376-0:01:29.642	BL	0.59547	8	2.23077
Trial 1	M1-2	C-P	M	0:01:29.642-0:01:29.908	BL	0.957831	8	3.58828
Trial 1	M1-2	C-P	M	0:01:29.908-0:01:30.174	BL	2.92833	8	10.9703
Trial 1	M1-2	C-P	M	0:01:30.174-0:01:30.440	BL	2.00055	8	7.49455
Trial 1	M1-2	C-P	M	0:01:30.440-0:01:30.706	BL	1.32691	8	4.9709
Trial 1	M1-2	C-P	M	0:01:30.706-0:01:30.972	BL	3.02206	8	11.3214
Trial 1	M1-2	C-P	M	0:01:30.972-0:01:31.238	BL	0.958535	8	3.59094
Trial 1	M1-2	C-P	M	0:01:31.238-0:01:31.504	BL	0.800713	8	2.99966
Trial 1	M1-2	C-P	M	0:01:31.504-0:01:31.770	BL	0.339082	8	1.27029
Trial 1	M1-2	C-P	M	0:01:31.770-0:01:32.036	BL	0.274777	8	1.0294
Trial 1	M1-2	C-P	M	0:01:32.036-0:01:32.302	BL	0.11685	8	0.437748
Trial 1	M1-2	C-P	M	0:01:32.302-0:01:32.568	BL	0.2736	8	1.02497
Trial 1	M1-2	C-P	M	0:01:32.568-0:01:32.834	BL	0.160687	8	0.601971
Trial 1	M1-2	C-P	M	0:01:32.834-0:01:33.100	BL	0.330677	8	1.2388
Trial 1	M1-2	C-P	M	0:01:33.100-0:01:33.366	BL	0.507386	8	1.9008
Trial 1	M1-2	C-P	M	0:01:33.366-0:01:33.632	BL	0.191261	8	0.71651
Trial 1	M1-2	C-P	M	0:01:33.632-0:01:33.898	BL	0.37965	8	1.42226
Trial 1	M1-2	C-P	M	0:01:33.898-0:01:34.164	BL	0.254717	8	0.95423
Trial 1	M1-2	C-P	M	0:01:34.164-0:01:34.430	BL	0.268526	8	1.00596
Trial 1	M1-2	C-P	M	0:01:34.430-0:01:34.696	BL	0.174628	8	0.654209
Trial 1	M1-2	C-P	M	0:01:34.696-0:01:34.962	BL	0.222964	8	0.835285
Trial 1	M1-2	C-P	M	0:01:34.962-0:01:35.228	BL	0.248105	7	1.06224
Trial 1	M1-2	C-P	M	0:01:35.228-0:01:35.494	BL	0.234272	8	0.87764
Trial 1	M1-2	C-P	M	0:01:35.494-0:01:35.760	BL	0.166153	8	0.62245
Trial 1	M1-2	C-P	M	0:01:35.760-0:01:36.026	BL	0.177134	8	0.663589
Trial 1	M1-2	C-P	M	0:01:36.026-0:01:36.292	BL	0.320563	8	1.20091
Trial 1	M1-2	C-P	M	0:01:36.292-0:01:36.558	BL	0.168559	8	0.631462
Trial 1	M1-2	C-P	M	0:01:36.558-0:01:36.824	BL	0.0739133	8	0.276896
Trial 1	M1-2	C-P	M	0:01:36.824-0:01:37.090	BL	0.226496	8	0.848507
Trial 1	M1-2	C-P	M	0:01:37.090-0:01:37.356	BL	0.390656	8	1.4635
Trial 1	M1-2	C-P	M	0:01:37.356-0:01:37.622	BL	0.25957	8	0.972411
Trial 1	M1-2	C-P	M	0:01:37.622-0:01:37.888	BL	0.115883	8	0.434127
Trial 1	M1-2	C-P	M	0:01:37.888-0:01:38.154	BL	0.403216	8	1.51055
Trial 1	M1-2	C-P	M	0:01:38.154-0:01:38.420	BL	0.251022	8	0.940386
Trial 1	M1-2	C-P	M	0:01:38.420-0:01:38.686	BL	0.187065	8	0.700788
Trial 1	M1-2	C-P	M	0:01:38.686-0:01:38.952	BL	0.198637	8	0.744146
Trial 1	M1-2	C-P	M	0:01:38.952-0:01:39.218	BL	0.600812	8	2.25079
Trial 1	M1-2	C-P	M	0:01:39.218-0:01:39.484	BL	0.68725	8	2.57462
Trial 1	M1-2	C-P	M	0:01:39.484-0:01:39.750	BL	0.375999	8	1.40858
Trial 1	M1-2	C-P	M	0:01:39.750-0:01:40.016	BL	0.542065	8	2.03072
Trial 1	M1-2	C-P	M	0:01:40.016-0:01:40.282	BL	0.221964	8	0.831538
Trial 1	M1-2	C-P	M	0:01:40.282-0:01:40.548	BL	0.106304	8	0.398244
Trial 1	M1-2	C-P	M	0:01:40.548-0:01:40.814	BL	0.383817	8	1.4379
Trial 1	M1-2	C-P	M	0:01:40.814-0:01:41.080	BL	1.06895	8	4.00454
Trial 1	M1-2	C-P	M	0:01:41.080-0:01:41.346	BL	0.729969	8	2.73466
Trial 1	M1-2	C-P	M	0:01:41.346-0:01:41.612	BL	0.979926	8	3.67105
Trial 1	M1-2	C-P	M	0:01:41.612-0:01:41.878	BL	0.612021	8	2.29278
Trial 1	M1-2	C-P	M	0:01:41.878-0:01:42.144	BL	0.33447	8	1.253
Trial 1	M1-2	C-P	M	0:01:42.144-0:01:42.410	BL	0.274369	8	1.02785
Trial 1	M1-2	C-P	M	0:01:42.410-0:01:42.676	BL	0.307276	8	1.15113
Trial 1	M1-2	C-P	M	0:01:42.676-0:01:42.942	BL	0.277248	8	1.03864
Trial 1	M1-2	C-P	M	0:01:42.942-0:01:43.208	BL	0.165064	8	0.618375
Trial 1	M1-2	C-P	M	0:01:43.208-0:01:43.474	BL	0.286978	8	1.07509
Trial 1	M1-2	C-P	M	0:01:43.474-0:01:43.740	BL	0.245617	8	0.92014
Trial 1	M1-2	C-P	M	0:01:43.740-0:01:44.006	BL	0.430511	8	1.6128
Trial 1	M1-2	C-P	M	0:01:44.006-0:01:44.272	BL	0.210539	8	0.788732
Trial 1	M1-2	C-P	M	0:01:44.272-0:01:44.538	BL	0.352743	8	1.32147
Trial 1	M1-2	C-P	M	0:01:44.538-0:01:44.804	BL	0.389103	7	1.66592
Trial 1	M1-2	C-P	M	0:01:44.804-0:01:45.070	BL	0.47293	8	1.77171
Trial 1	M1-2	C-P	M	0:01:45.070-0:01:45.336	BL	0.447082	8	1.67488
Trial 1	M1-2	C-P	M	0:01:45.336-0:01:45.602	BL	0.498723	8	1.86834
Trial 1	M1-2	C-P	M	0:01:45.602-0:01:45.868	BL	0.305036	8	1.14274
Trial 1	M1-2	C-P	M	0:01:45.868-0:01:46.134	BL	0.284954	8	1.06751
Trial 1	M1-2	C-P	M	0:01:46.134-0:01:46.400	BL	0.189362	8	0.709398
Trial 1	M1-2	C-P	M	0:01:46.400-0:01:46.666	BL	0.124151	8	0.465098
Trial 1	M1-2	C-P	M	0:01:46.666-0:01:46.932	BL	0.163228	8	0.611495
Trial 1	M1-2	C-P	M	0:01:46.932-0:01:47.198	BL	0.0395351	8	0.148108
Trial 1	M1-2	C-P	M	0:01:47.198-0:01:47.464	BL	0.0867125	8	0.324846
Trial 1	M1-2	C-P	M	0:01:47.464-0:01:47.730	BL	0.079721	8	0.298655
Trial 1	M1-2	C-P	M	0:01:47.730-0:01:47.996	BL	0.0600066	8	0.224801
Trial 1	M1-2	C-P	M	0:01:47.996-0:01:48.262	BL	0.364602	8	1.36589
Trial 1	M1-2	C-P	M	0:01:48.262-0:01:48.528	BL	0.326404	8	1.22279
Trial 1	M1-2	C-P	M	0:01:48.528-0:01:48.794	BL	0.469935	8	1.76049
Trial 1	M1-2	C-P	M	0:01:48.794-0:01:49.060	BL	0.252896	8	0.94741
Trial 1	M1-2	C-P	M	0:01:49.060-0:01:49.326	BL	0.250799	8	0.939556
Trial 1	M1-2	C-P	M	0:01:49.326-0:01:49.592	BL	0.0830878	8	0.311268
Trial 1	M1-2	C-P	M	0:01:49.592-0:01:49.858	BL	0.337984	8	1.26616
Trial 1	M1-2	C-P	M	0:01:49.858-0:01:50.124	BL	0.348118	8	1.30414
Trial 1	M1-2	C-P	M	0:01:50.124-0:01:50.390	BL	0.64231	8	2.40625
Trial 1	M1-2	C-P	M	0:01:50.390-0:01:50.656	BL	0.469837	8	1.76012
Trial 1	M1-2	C-P	M	0:01:50.656-0:01:50.922	BL	0.199499	8	0.747375
Trial 1	M1-2	C-P	M	0:01:50.922-0:01:51.188	BL	0.290482	8	1.08822
Trial 1	M1-2	C-P	M	0:01:51.188-0:01:51.454	BL	0.220478	8	0.825965
Trial 1	M1-2	C-P	M	0:01:51.454-0:01:51.720	BL	0.278081	8	1.04177
Trial 1	M1-2	C-P	M	0:01:51.720-0:01:51.986	BL	0.326139	8	1.2218
Trial 1	M1-2	C-P	M	0:01:51.986-0:01:52.252	BL	0.458436	8	1.71742
Trial 1	M1-2	C-P	M	0:01:52.252-0:01:52.518	BL	0.373848	8	1.40052
Trial 1	M1-2	C-P	M	0:01:52.518-0:01:52.784	BL	0.452408	8	1.69483
Trial 1	M1-2	C-P	M	0:01:52.784-0:01:53.050	BL	0.139726	8	0.523452
Trial 1	M1-2	C-P	M	0:01:53.050-0:01:53.316	BL	0.0857956	8	0.32141
Trial 1	M1-2	C-P	M	0:01:53.316-0:01:53.582	BL	0.0982137	8	0.367932
Trial 1	M1-2	C-P	M	0:01:53.582-0:01:53.848	BL	0.214928	8	0.805171
Trial 1	M1-2	C-P	M	0:01:53.848-0:01:54.114	BL	0.257569	7	1.10276
Trial 1	M1-2	C-P	M	0:01:54.114-0:01:54.380	BL	0.233563	8	0.874986
Trial 1	M1-2	C-P	M	0:01:54.380-0:01:54.646	BL	0.0819325	8	0.306941
Trial 1	M1-2	C-P	M	0:01:54.646-0:01:54.912	BL	0.0530749	8	0.19883
Trial 1	M1-2	C-P	M	0:01:54.912-0:01:55.178	BL	0.0282601	8	0.10587
Trial 1	M1-2	C-P	M	0:01:55.178-0:01:55.444	BL	0.0682723	8	0.255765
Trial 1	M1-2	C-P	M	0:01:55.444-0:01:55.710	BL	0.288827	8	1.08202
Trial 1	M1-2	C-P	M	0:01:55.710-0:01:55.976	BL	0.67749	8	2.53804
Trial 1	M1-2	C-P	M	0:01:55.976-0:01:56.242	BL	0.352659	8	1.32115
Trial 1	M1-2	C-P	M	0:01:56.242-0:01:56.508	BL	0.513247	8	1.92275
Trial 1	M1-2	C-P	M	0:01:56.508-0:01:56.774	BL	0.222307	8	0.832813
Trial 1	M1-2	C-P	M	0:01:56.774-0:01:57.040	BL	0.997672	8	3.73755
Trial 1	M1-2	C-P	M	0:01:57.040-0:01:57.306	BL	2.20575	8	8.26328
Trial 1	M1-2	C-P	M	0:01:57.306-0:01:57.572	BL	0.807362	8	3.02457
Trial 1	M1-2	C-P	M	0:01:57.572-0:01:57.838	BL	0.338057	8	1.26645
Trial 1	M1-2	C-P	M	0:01:57.838-0:01:58.104	BL	1.01411	8	3.79908
Trial 1	M1-2	C-P	M	0:01:58.104-0:01:58.370	BL	2.72962	8	10.2259
Trial 1	M1-2	C-P	M	0:01:58.370-0:01:58.636	BL	3.00243	8	11.2478
Trial 1	M1-2	C-P	M	0:01:58.636-0:01:58.902	BL	1.28597	8	4.81755
Trial 1	M1-2	C-P	M	0:01:58.902-0:01:59.168	BL	2.22045	8	8.31841
Trial 1	M1-2	C-P	M	0:01:59.168-0:01:59.434	BL	3.13677	8	11.7511
Trial 1	M1-2	C-P	M	0:01:59.434-0:01:59.700	BL	2.9804	8	11.1654
Trial 1	M1-2	C-P	M	0:01:59.700-0:01:59.966	BL	1.13956	8	4.26906
Trial 1	M1-2	C-P	M	0:01:59.966-0:02:00.232	BL	0.674493	8	2.52681
Trial 1	M1-2	C-P	M	0:02:00.232-0:02:00.498	BL	0.454017	8	1.70086
Trial 1	M1-2	C-P	M	0:02:00.498-0:02:00.764	BL	1.07409	8	4.02382
Trial 1	M1-2	C-P	M	0:02:00.764-0:02:01.030	BL	0.882912	8	3.30762
Trial 1	M1-2	C-P	M	0:02:01.030-0:02:01.296	BL	0.582425	8	2.1819
Trial 1	M1-2	C-P	M	0:02:01.296-0:02:01.562	BL	0.678893	8	2.54329
Trial 1	M1-2	C-P	M	0:02:01.562-0:02:01.828	BL	0.229612	8	0.860182
Trial 1	M1-2	C-P	M	0:02:01.828-0:02:02.094	BL	0.602483	8	2.25706
Trial 1	M1-2	C-P	M	0:02:02.094-0:02:02.360	BL	0.547593	8	2.05141
Trial 1	M1-2	C-P	M	0:02:02.360-0:02:02.626	BL	0.984299	8	3.68742
Trial 1	M1-2	C-P	M	0:02:02.626-0:02:02.892	BL	0.0661557	8	0.247836
Trial 1	M1-2	C-P	M	0:02:02.892-0:02:03.158	BL	0.0661557	8	0.247836
Trial 1	M1-2	C-P	M	0:02:03.158-0:02:03.424	BL	0.0661557	8	0.247836
Trial 1	M1-2	C-P	M	0:02:03.424-0:02:03.690	BL	0.0578863	7	0.247836
Trial 1	M1-2	C-P	M	0:02:03.690-0:02:03.956	BL	0.0661557	8	0.247836
Trial 1	M1-2	C-P	M	0:02:03.956-0:02:04.222	BL	0.0661557	8	0.247836
Trial 1	M1-2	C-P	M	0:02:04.222-0:02:04.488	BL	0.0661557	8	0.247836
Trial 1	M1-2	C-P	M	0:02:04.488-0:02:04.754	BL	0.0661557	8	0.247836
Trial 1	M1-2	C-P	M	0:02:04.754-0:02:05.020	BL	0.0661557	8	0.247836
Trial 1	M1-2	C-P	M	0:02:05.020-0:02:05.286	BL	0.0661557	8	0.247836
Trial 1	M1-2	C-P	M	0:02:05.286-0:02:05.552	BL	0.0661557	8	0.247836
Trial 1	M1-2	C-P	M	0:02:05.552-0:02:05.818	BL	0.0661557	8	0.247836
Trial 1	M1-2	C-P	M	0:02:05.818-0:02:06.084	BL	0.0661557	8	0.247836
Trial 1	M1-2	C-P	M	0:02:06.084-0:02:06.350	BL	0.0661557	8	0.247836
Trial 1	M1-2	C-P	M	0:02:06.350-0:02:06.616	BL	0.0661557	8	0.247836
Trial 1	M1-2	C-P	M	0:02:06.616-0:02:06.882	BL	0.0661557	8	0.247836
Trial 1	M1-2	C-P	M	0:02:06.882-0:02:07.148	BL	0.0661557	8	0.247836
Trial 1	M1-2	C-P	M	0:02:07.148-0:02:07.414	BL	0.0661557	8	0.247836
Trial 1	M1-2	C-P	M	0:02:07.414-0:02:07.680	BL	0.0661557	8	0.247836
Trial 1	M1-2	C-P	M	0:02:07.680-0:02:07.946	BL	0.86559	8	3.24276
Trial 1	M1-2	C-P	M	0:02:07.946-0:02:08.212	BL	1.70125	8	6.37328
Trial 1	M1-2	C-P	M	0:02:08.212-0:02:08.478	BL	2.04923	8	7.6769
Trial 1	M1-2	C-P	M	0:02:08.478-0:02:08.744	BL	1.76681	8	6.61891
Trial 1	M1-2	C-P	M	0:02:08.744-0:02:09.010	BL	1.04135	8	3.90114
Trial 1	M1-2	C-P	M	0:02:09.010-0:02:09.276	BL	0.895975	8	3.35654
Trial 1	M1-2	C-P	M	0:02:09.276-0:02:09.542	BL	3.49942	8	13.1097
Trial 1	M1-2	C-P	M	0:02:09.542-0:02:09.808	BL	1.85001	8	6.93061
Trial 1	M1-2	C-P	M	0:02:09.808-0:02:10.074	BL	1.16238	8	4.3546
Trial 1	M1-2	C-P	M	0:02:10.074-0:02:10.340	BL	0.419075	8	1.56995
Trial 1	M1-2	C-P	M	0:02:10.340-0:02:10.606	BL	0.124241	8	0.465441
Trial 1	M1-2	C-P	M	0:02:10.606-0:02:10.872	BL	0.0997715	8	0.373768
Trial 1	M1-2	C-P	M	0:02:10.872-0:02:11.138	BL	0.129823	8	0.486354
Trial 1	M1-2	C-P	M	0:02:11.138-0:02:11.404	BL	0.150687	8	0.564508
Trial 1	M1-2	C-P	M	0:02:11.404-0:02:11.670	BL	0.940537	8	3.52348
Trial 1	M1-2	C-P	M	0:02:11.670-0:02:11.936	BL	0.625985	8	2.3451
Trial 1	M1-2	C-P	M	0:02:11.936-0:02:12.202	BL	0.56687	8	2.12364
Trial 1	M1-2	C-P	M	0:02:12.202-0:02:12.468	BL	0.469082	8	1.7573
Trial 1	M1-2	C-P	M	0:02:12.468-0:02:12.734	BL	0.907142	8	3.39839
Trial 1	M1-2	C-P	M	0:02:12.734-0:02:13.000	BL	2.00765	8	7.52114
Trial 1	M1-2	C-P	M	0:02:13.000-0:02:13.266	BL	3.57042	7	15.2866
Trial 1	M1-2	C-P	M	0:02:13.266-0:02:13.532	BL	0.929001	8	3.48027
Trial 1	M1-2	C-P	M	0:02:13.532-0:02:13.798	BL	0.212081	8	0.794503
Trial 1	M1-2	C-P	M	0:02:13.798-0:02:14.064	BL	0.883581	8	3.31012
Trial 1	M1-2	C-P	M	0:02:14.064-0:02:14.330	BL	3.02941	8	11.3489
Trial 1	M1-2	C-P	M	0:02:14.330-0:02:14.596	BL	1.7685	8	6.62524
Trial 1	M1-2	C-P	M	0:02:14.596-0:02:14.862	BL	0.810492	8	3.0363
Trial 1	M1-2	C-P	M	0:02:14.862-0:02:15.128	BL	1.33153	8	4.98824
Trial 1	M1-2	C-P	M	0:02:15.128-0:02:15.394	BL	1.49383	8	5.59627
Trial 1	M1-2	C-P	M	0:02:15.394-0:02:15.660	BL	1.09593	8	4.1056
Trial 1	M1-2	C-P	M	0:02:15.660-0:02:15.926	BL	1.24378	8	4.65949
Trial 1	M1-2	C-P	M	0:02:15.926-0:02:16.192	BL	0.957082	8	3.58548
Trial 1	M1-2	C-P	M	0:02:16.192-0:02:16.458	BL	1.12826	8	4.22672
Trial 1	M1-2	C-P	M	0:02:16.458-0:02:16.724	BL	0.57981	8	2.17213
Trial 1	M1-2	C-P	M	0:02:16.724-0:02:16.990	BL	0.763558	8	2.86048
Trial 1	M1-2	C-P	M	0:02:16.990-0:02:17.256	BL	0.579287	8	2.17016
Trial 1	M1-2	C-P	M	0:02:17.256-0:02:17.522	BL	0.835981	8	3.13181
Trial 1	M1-2	C-P	M	0:02:17.522-0:02:17.788	BL	0.881653	8	3.30289
Trial 1	M1-2	C-P	M	0:02:17.788-0:02:18.054	BL	0.789781	8	2.9587
Trial 1	M1-2	C-P	M	0:02:18.054-0:02:18.320	BL	0.416001	8	1.55843
Trial 1	M1-2	C-P	M	0:02:18.320-0:02:18.586	BL	3.69926	8	13.8584
Trial 1	M1-2	C-P	M	0:02:18.586-0:02:18.852	BL	0.655205	8	2.45458
Trial 1	M1-2	C-P	M	0:02:18.852-0:02:19.118	BL	0.424039	8	1.58855
Trial 1	M1-2	C-P	M	0:02:19.118-0:02:19.384	BL	0.203785	8	0.763427
Trial 1	M1-2	C-P	M	0:02:19.384-0:02:19.650	BL	0.166256	8	0.622834
Trial 1	M1-2	C-P	M	0:02:19.650-0:02:19.916	BL	0.294613	8	1.10369
Trial 1	M1-2	C-P	M	0:02:19.916-0:02:20.182	BL	0.164126	8	0.614857
Trial 1	M1-2	C-P	M	0:02:20.182-0:02:20.448	BL	0.21539	8	0.806901
Trial 1	M1-2	C-P	M	0:02:20.448-0:02:20.714	BL	0.191976	8	0.719192
Trial 1	M1-2	C-P	M	0:02:20.714-0:02:20.980	BL	0.121136	8	0.453803
Trial 1	M1-2	C-P	M	0:02:20.980-0:02:21.246	BL	0.28128	8	1.05374
Trial 1	M1-2	C-P	M	0:02:21.246-0:02:21.512	BL	0.541358	8	2.02807
Trial 1	M1-2	C-P	M	0:02:21.512-0:02:21.778	BL	0.228968	8	0.85777
Trial 1	M1-2	C-P	M	0:02:21.778-0:02:22.044	BL	1.02753	8	3.84938
Trial 1	M1-2	C-P	M	0:02:22.044-0:02:22.310	BL	1.77311	8	6.64248
Trial 1	M1-2	C-P	M	0:02:22.310-0:02:22.576	BL	1.04195	8	3.90343
Trial 1	M1-2	C-P	M	0:02:22.576-0:02:22.842	BL	0.280847	7	1.20243
Trial 1	M1-2	C-P	M	0:02:22.842-0:02:23.108	BL	0.608974	8	2.28138
Trial 1	M1-2	C-P	M	0:02:23.108-0:02:23.374	BL	0.422006	8	1.58094
Trial 1	M1-2	C-P	M	0:02:23.374-0:02:23.640	BL	0.301355	8	1.12895
Trial 1	M1-2	C-P	M	0:02:23.640-0:02:23.906	BL	0.795278	8	2.97929
Trial 1	M1-2	C-P	M	0:02:23.906-0:02:24.172	BL	1.94297	8	7.27884
Trial 1	M1-2	C-P	M	0:02:24.172-0:02:24.438	BL	1.58728	8	5.94638
Trial 1	M1-2	C-P	M	0:02:24.438-0:02:24.704	BL	0.888236	8	3.32756
Trial 1	M1-2	C-P	M	0:02:24.704-0:02:24.970	BL	0.799363	8	2.99461
Trial 1	M1-2	C-P	M	0:02:24.970-0:02:25.236	BL	0.630351	8	2.36145
Trial 1	M1-2	C-P	M	0:02:25.236-0:02:25.502	BL	1.32072	8	4.94775
Trial 1	M1-2	C-P	M	0:02:25.502-0:02:25.768	BL	0.798394	8	2.99099
Trial 1	M1-2	C-P	M	0:02:25.768-0:02:26.034	BL	0.96334	8	3.60889
Trial 1	M1-2	C-P	M	0:02:26.034-0:02:26.300	BL	0.842299	8	3.15547
Trial 1	M1-2	C-P	M	0:02:26.300-0:02:26.566	BL	2.33237	8	8.73763
Trial 1	M1-2	C-P	M	0:02:26.566-0:02:26.832	BL	1.27184	8	4.76462
Trial 1	M1-2	C-P	M	0:02:26.832-0:02:27.098	BL	1.49179	8	5.58861
Trial 1	M1-2	C-P	M	0:02:27.098-0:02:27.364	BL	2.28638	8	8.56533
Trial 1	M1-2	C-P	M	0:02:27.364-0:02:27.630	BL	0.583377	8	2.18549
Trial 1	M1-2	C-P	M	0:02:27.630-0:02:27.896	BL	0.806324	8	3.02069
Trial 1	M1-2	C-P	M	0:02:27.896-0:02:28.162	BL	1.09154	8	4.08918
Trial 1	M1-2	C-P	M	0:02:28.162-0:02:28.428	BL	0.423197	8	1.58539
Trial 1	M1-2	C-P	M	0:02:28.428-0:02:28.694	BL	0.169457	8	0.634825
Trial 1	M1-2	C-P	M	0:02:28.694-0:02:28.960	BL	0.10705	8	0.40104
Trial 1	M1-2	C-P	M	0:02:28.960-0:02:29.226	BL	0.0525216	8	0.196758
Trial 1	M1-2	C-P	M	0:02:29.226-0:02:29.492	BL	0.0759483	8	0.284522
Trial 1	M1-2	C-P	M	0:02:29.492-0:02:29.758	BL	0.0612197	8	0.229345
Trial 1	M1-2	C-P	M	0:02:29.758-0:02:30.024	BL	0.900411	8	3.37317
Trial 1	M1-2	C-P	M	0:02:30.024-0:02:30.290	BL	3.7036	8	13.8746
Trial 1	M1-2	C-P	M	0:02:30.290-0:02:30.556	BL	3.26573	8	12.2342
Trial 1	M1-2	C-P	M	0:02:30.556-0:02:30.822	BL	4.70168	8	17.6136
Trial 1	M1-2	C-P	M	0:02:30.822-0:02:31.088	BL	3.91542	8	14.6682
Trial 1	M1-2	C-P	M	0:02:31.088-0:02:31.354	BL	1.70112	8	6.37282
Trial 1	M1-2	C-P	M	0:02:31.354-0:02:31.620	BL	2.19162	8	8.21034
Trial 1	M1-2	C-P	M	0:02:31.620-0:02:31.886	BL	1.20386	8	4.50995
Trial 1	M1-2	C-P	M	0:02:31.886-0:02:32.152	BL	3.05594	7	13.0838
Trial 1	M1-2	C-P	M	0:02:32.152-0:02:32.418	BL	1.99455	8	7.47211
Trial 1	M1-2	C-P	M	0:02:32.418-0:02:32.684	BL	2.4304	8	9.10491
Trial 1	M1-2	C-P	M	0:02:32.684-0:02:32.950	BL	5.8671	8	21.9797
Trial 1	M1-2	C-P	M	0:02:32.950-0:02:33.216	BL	4.0113	8	15.0273
Trial 1	M1-2	C-P	M	0:02:33.216-0:02:33.482	BL	1.14948	8	4.30622
Trial 1	M1-2	C-P	M	0:02:33.482-0:02:33.748	BL	0.841755	8	3.15342
Trial 1	M1-2	C-P	M	0:02:33.748-0:02:34.014	BL	0.497308	8	1.86303
Trial 1	M1-2	C-P	M	0:02:34.014-0:02:34.280	BL	0.385347	8	1.4436
Trial 1	M1-2	C-P	M	0:02:34.280-0:02:34.546	BL	0.444371	8	1.66472
Trial 1	M1-2	C-P	M	0:02:34.546-0:02:34.812	BL	0.978442	8	3.66548
Trial 1	M1-2	C-P	M	0:02:34.812-0:02:35.078	BL	0.474005	8	1.77574
Trial 1	M1-2	C-P	M	0:02:35.078-0:02:35.344	BL	0.128573	8	0.481662
Trial 1	M1-2	C-P	M	0:02:35.344-0:02:35.610	BL	0.161729	8	0.605876
Trial 1	M1-2	C-P	M	0:02:35.610-0:02:35.876	BL	0.0403292	8	0.151082
Trial 1	M1-2	C-P	M	0:02:35.876-0:02:36.142	BL	0.0936922	8	0.350993
Trial 1	M1-2	C-P	M	0:02:36.142-0:02:36.408	BL	0.313907	8	1.17598
Trial 1	M1-2	C-P	M	0:02:36.408-0:02:36.674	BL	0.290413	8	1.08796
Trial 1	M1-2	C-P	M	0:02:36.674-0:02:36.940	BL	0.583242	8	2.18496
Trial 1	M1-2	C-P	M	0:02:36.940-0:02:37.206	BL	0.667991	8	2.50248
Trial 1	M1-2	C-P	M	0:02:37.206-0:02:37.472	BL	0.43488	8	1.62917
Trial 1	M1-2	C-P	M	0:02:37.472-0:02:37.738	BL	0.447959	8	1.67817
Trial 1	M1-2	C-P	M	0:02:37.738-0:02:38.004	BL	0.809827	8	3.03381
Trial 1	M1-2	C-P	M	0:02:38.004-0:02:38.270	BL	1.47964	8	5.54308
Trial 1	M1-2	C-P	M	0:02:38.270-0:02:38.536	BL	1.10595	8	4.14319
Trial 1	M1-2	C-P	M	0:02:38.536-0:02:38.802	BL	0.946112	8	3.54437
Trial 1	M1-2	C-P	M	0:02:38.802-0:02:39.068	BL	2.0272	8	7.59444
Trial 1	M1-2	C-P	M	0:02:39.068-0:02:39.334	BL	1.3007	8	4.87271
Trial 1	M1-2	C-P	M	0:02:39.334-0:02:39.600	BL	0.150789	8	0.564894
Trial 1	M1-2	C-P	M	0:02:39.600-0:02:39.866	BL	1.02722	8	3.84821
Trial 1	M1-2	C-P	M	0:02:39.866-0:02:40.132	BL	2.43623	8	9.12672
Trial 1	M1-2	C-P	M	0:02:40.132-0:02:40.398	BL	2.48577	8	9.31231
Trial 1	M1-2	C-P	M	0:02:40.398-0:02:40.664	BL	1.1832	8	4.43254
Trial 1	M1-2	C-P	M	0:02:40.664-0:02:40.930	BL	1.04044	8	3.89775
Trial 1	M1-2	C-P	M	0:02:40.930-0:02:41.196	BL	1.91034	8	7.15661
Trial 1	M1-2	C-P	M	0:02:41.196-0:02:41.462	BL	1.4043	8	5.26086
Trial 1	M1-2	C-P	M	0:02:41.462-0:02:41.728	BL	0.442385	7	1.89405
Trial 1	M1-2	C-P	M	0:02:41.728-0:02:41.994	BL	0.154832	8	0.580041
Trial 1	M1-2	C-P	M	0:02:41.994-0:02:42.260	BL	0.183991	8	0.689278
Trial 1	M1-2	C-P	M	0:02:42.260-0:02:42.526	BL	0.0295474	8	0.110692
Trial 1	M1-2	C-P	M	0:02:42.526-0:02:42.792	BL	0.0577836	8	0.216472
Trial 1	M1-2	C-P	M	0:02:42.792-0:02:43.058	BL	0.138492	8	0.518821
Trial 1	M1-2	C-P	M	0:02:43.058-0:02:43.324	BL	1.57996	8	5.91894
Trial 1	M1-2	C-P	M	0:02:43.324-0:02:43.590	BL	1.66219	8	6.22698
Trial 1	M1-2	C-P	M	0:02:43.590-0:02:43.856	BL	1.62069	8	6.0715
Trial 1	M1-2	C-P	M	0:02:43.856-0:02:44.122	BL	3.94709	8	14.7868
Trial 1	M1-2	C-P	M	0:02:44.122-0:02:44.388	BL	5.53477	8	20.7346
Trial 1	M1-2	C-P	M	0:02:44.388-0:02:44.654	BL	4.16785	8	15.6139
Trial 1	M1-2	C-P	M	0:02:44.654-0:02:44.920	BL	2.26729	8	8.49378
Trial 1	M1-2	C-P	M	0:02:44.920-0:02:45.186	BL	1.16625	8	4.36904
Trial 1	M1-2	C-P	M	0:02:45.186-0:02:45.452	BL	3.24952	8	12.1735
Trial 1	M1-2	C-P	M	0:02:45.452-0:02:45.718	BL	2.09285	8	7.84034
Trial 1	M1-2	C-P	M	0:02:45.718-0:02:45.984	BL	4.273	8	16.0077
Trial 1	M1-2	C-P	M	0:02:45.984-0:02:46.250	BL	3.31821	8	12.4308
Trial 1	M1-2	C-P	M	0:02:46.250-0:02:46.516	BL	1.72093	8	6.44706
Trial 1	M1-2	C-P	M	0:02:46.516-0:02:46.782	BL	0.553565	8	2.0738
Trial 1	M1-2	C-P	M	0:02:46.782-0:02:47.048	BL	0.0467781	8	0.175242
Trial 1	M1-2	C-P	M	0:02:47.048-0:02:47.314	BL	0.0467781	8	0.175243
Trial 1	M1-2	C-P	M	0:02:47.314-0:02:47.580	BL	0.0467781	8	0.175242
Trial 1	M1-2	C-P	M	0:02:47.580-0:02:47.846	BL	0.0467781	8	0.175242
Trial 1	M1-2	C-P	M	0:02:47.846-0:02:48.112	BL	0.0467781	8	0.175243
Trial 1	M1-2	C-P	M	0:02:48.112-0:02:48.378	BL	0.0467781	8	0.175242
Trial 1	M1-2	C-P	M	0:02:48.378-0:02:48.644	BL	0.0467781	8	0.175243
Trial 1	M1-2	C-P	M	0:02:48.644-0:02:48.910	BL	0.0467781	8	0.175242
Trial 1	M1-2	C-P	M	0:02:48.910-0:02:49.176	BL	0.0467781	8	0.175242
Trial 1	M1-2	C-P	M	0:02:49.176-0:02:49.442	BL	0.0467781	8	0.175243
Trial 1	M1-2	C-P	M	0:02:49.442-0:02:49.708	BL	0.0467781	8	0.175242
Trial 1	M1-2	C-P	M	0:02:49.708-0:02:49.974	BL	0.0467781	8	0.175243
Trial 1	M1-2	C-P	M	0:02:49.974-0:02:50.240	BL	0.0467781	8	0.175242
Trial 1	M1-2	C-P	M	0:02:50.240-0:02:50.506	BL	1.86041	8	6.96955
Trial 1	M1-2	C-P	M	0:02:50.506-0:02:50.772	BL	1.83853	8	6.88762
Trial 1	M1-2	C-P	M	0:02:50.772-0:02:51.038	BL	1.27436	8	4.77407
Trial 1	M1-2	C-P	M	0:02:51.038-0:02:51.304	BL	1.45039	7	6.20976
Trial 1	M1-2	C-P	M	0:02:51.304-0:02:51.570	BL	1.57862	8	5.9139
Trial 1	M1-2	C-P	M	0:02:51.570-0:02:51.836	BL	2.25353	8	8.44231
Trial 1	M1-2	C-P	M	0:02:51.836-0:02:52.102	BL	0.87839	8	3.29067
Trial 1	M1-2	C-P	M	0:02:52.102-0:02:52.368	BL	0.680229	8	2.54831
Trial 1	M1-2	C-P	M	0:02:52.368-0:02:52.634	BL	0.690764	8	2.58778
Trial 1	M1-2	C-P	M	0:02:52.634-0:02:52.900	BL	0.466386	8	1.74719
Trial 1	M1-2	C-P	M	0:02:52.900-0:02:53.166	BL	0.435596	8	1.63185
Trial 1	M1-2	C-P	M	0:02:53.166-0:02:53.432	BL	0.25502	8	0.955362
Trial 1	M1-2	C-P	M	0:02:53.432-0:02:53.698	BL	0.203925	8	0.763948
Trial 1	M1-2	C-P	M	0:02:53.698-0:02:53.964	BL	0.147824	8	0.553795
Trial 1	M1-2	C-P	M	0:02:53.964-0:02:54.230	BL	0.0788646	8	0.295446
Trial 1	M1-2	C-P	M	0:02:54.230-0:02:54.496	BL	0.0671875	8	0.2517
Trial 1	M1-2	C-P	M	0:02:54.496-0:02:54.762	BL	0.259774	8	0.973177
Trial 1	M1-2	C-P	M	0:02:54.762-0:02:55.028	BL	0.651052	8	2.439
Trial 1	M1-2	C-P	M	0:02:55.028-0:02:55.294	BL	0.930364	8	3.48537
Trial 1	M1-2	C-P	M	0:02:55.294-0:02:55.560	BL	1.48306	8	5.55592
Trial 1	M1-2	C-P	M	0:02:55.560-0:02:55.826	BL	1.60843	8	6.02559
Trial 1	M1-2	C-P	M	0:02:55.826-0:02:56.092	BL	0.553792	8	2.07465
Trial 1	M1-2	C-P	M	0:02:56.092-0:02:56.358	BL	0.526977	8	1.97419
Trial 1	M1-2	C-P	M	0:02:56.358-0:02:56.624	BL	0.159094	8	0.596004
Trial 1	M1-2	C-P	M	0:02:56.624-0:02:56.890	BL	0.127486	8	0.477598
Trial 1	M1-2	C-P	M	0:02:56.890-0:02:57.156	BL	0.0643652	8	0.241128
Trial 1	M1-2	C-P	M	0:02:57.156-0:02:57.422	BL	0.123532	8	0.46278
Trial 1	M1-2	C-P	M	0:02:57.422-0:02:57.688	BL	0.39043	8	1.46265
Trial 1	M1-2	C-P	M	0:02:57.688-0:02:57.954	BL	4.82578	8	18.0786
Trial 1	M1-2	C-P	M	0:02:57.954-0:02:58.220	BL	4.73313	8	17.7315
Trial 1	M1-2	C-P	M	0:02:58.220-0:02:58.486	BL	1.56705	8	5.87054
Trial 1	M1-2	C-P	M	0:02:58.486-0:02:58.752	BL	1.34755	8	5.04828
Trial 1	M1-2	C-P	M	0:02:58.752-0:02:59.018	BL	1.36936	8	5.12994
Trial 1	M1-2	C-P	M	0:02:59.018-0:02:59.284	BL	2.6014	8	9.74551
Trial 1	M1-2	C-P	M	0:02:59.284-0:02:59.550	BL	1.06576	8	3.99261
Trial 1	M1-2	C-P	M	0:02:59.550-0:02:59.816	BL	0.785735	8	2.94356
Trial 1	M1-2	C-P	M	0:02:59.816-0:03:00.082	BL	1.60576	8	6.0156
Trial 1	M1-2	C-P	M	0:03:00.082-0:03:00.348	CS1a	0.720844	8	2.70045
Trial 1	M1-2	C-P	M	0:03:00.348-0:03:00.614	CS1a	3.3429	8	12.5233
Trial 1	M1-2	C-P	M	0:03:00.614-0:03:00.880	CS1a	1.63962	7	7.01996
Trial 1	M1-2	C-P	M	0:03:00.880-0:03:01.146	CS1a	0.569937	8	2.13513
Trial 1	M1-2	C-P	M	0:03:01.146-0:03:01.412	CS1a	0.387936	8	1.4533
Trial 1	M1-2	C-P	M	0:03:01.412-0:03:01.678	CS1a	1.15937	8	4.34331
Trial 1	M1-2	C-P	M	0:03:01.678-0:03:01.944	CS1a	1.20126	8	4.50021
Trial 1	M1-2	C-P	M	0:03:01.944-0:03:02.210	CS1a	2.05161	8	7.68581
Trial 1	M1-2	C-P	M	0:03:02.210-0:03:02.476	CS1a	4.30102	8	16.1127
Trial 1	M1-2	C-P	M	0:03:02.476-0:03:02.742	CS1a	2.12713	8	7.96874
Trial 1	M1-2	C-P	M	0:03:02.742-0:03:03.008	CS1a	1.51665	8	5.68176
Trial 1	M1-2	C-P	M	0:03:03.008-0:03:03.274	CS1a	5.44415	8	20.3951
Trial 1	M1-2	C-P	M	0:03:03.274-0:03:03.540	CS1a	1.35908	8	5.09146
Trial 1	M1-2	C-P	M	0:03:03.540-0:03:03.806	CS1a	0.320694	8	1.2014
Trial 1	M1-2	C-P	M	0:03:03.806-0:03:04.072	CS1a	0.0792582	8	0.296918
Trial 1	M1-2	C-P	M	0:03:04.072-0:03:04.338	CS1a	0.164541	8	0.616416
Trial 1	M1-2	C-P	M	0:03:04.338-0:03:04.604	CS1a	0.139742	8	0.523504
Trial 1	M1-2	C-P	M	0:03:04.604-0:03:04.870	CS1a	0.0946198	8	0.354466
Trial 1	M1-2	C-P	M	0:03:04.870-0:03:05.136	CS1a	0.38587	8	1.44557
Trial 1	M1-2	C-P	M	0:03:05.136-0:03:05.402	CS1a	0.543942	8	2.03774
Trial 1	M1-2	C-P	M	0:03:05.402-0:03:05.668	CS1a	0.902372	8	3.38051
Trial 1	M1-2	C-P	M	0:03:05.668-0:03:05.934	CS1a	0.458581	8	1.71796
Trial 1	M1-2	C-P	M	0:03:05.934-0:03:06.200	CS1a	0.458581	8	1.71796
Trial 1	M1-2	C-P	M	0:03:06.200-0:03:06.466	CS1a	0.458581	8	1.71796
Trial 1	M1-2	C-P	M	0:03:06.466-0:03:06.732	CS1a	0.322404	8	1.2078
Trial 1	M1-2	C-P	M	0:03:06.732-0:03:06.998	CS1a	0.437018	8	1.63718
Trial 1	M1-2	C-P	M	0:03:06.998-0:03:07.264	CS1a	0.318271	8	1.19233
Trial 1	M1-2	C-P	M	0:03:07.264-0:03:07.530	CS1a	0.238532	8	0.893599
Trial 1	M1-2	C-P	M	0:03:07.530-0:03:07.796	CS1a	0.246529	8	0.923555
Trial 1	M1-2	C-P	M	0:03:07.796-0:03:08.062	CS1a	0.691484	8	2.59048
Trial 1	M1-2	C-P	M	0:03:08.062-0:03:08.328	CS1a	0.426872	8	1.59918
Trial 1	M1-2	C-P	M	0:03:08.328-0:03:08.594	CS1a	0.307263	8	1.15109
Trial 1	M1-2	C-P	M	0:03:08.594-0:03:08.860	CS1a	0.188959	8	0.707891
Trial 1	M1-2	C-P	M	0:03:08.860-0:03:09.126	CS1a	0.156695	8	0.587025
Trial 1	M1-2	C-P	M	0:03:09.126-0:03:09.392	CS1a	0.302908	8	1.13476
Trial 1	M1-2	C-P	M	0:03:09.392-0:03:09.658	CS1a	0.454936	8	1.70431
Trial 1	M1-2	C-P	M	0:03:09.658-0:03:09.924	CS1a	0.210072	8	0.786981
Trial 1	M1-2	C-P	M	0:03:09.924-0:03:10.190	CS1b	0.127411	7	0.545497
Trial 1	M1-2	C-P	M	0:03:10.190-0:03:10.456	CS1b	1.33696	8	5.00859
Trial 1	M1-2	C-P	M	0:03:10.456-0:03:10.722	CS1b	0.335773	8	1.25789
Trial 1	M1-2	C-P	M	0:03:10.722-0:03:10.988	CS1b	0.0372472	8	0.139537
Trial 1	M1-2	C-P	M	0:03:10.988-0:03:11.254	CS1b	0.0700056	8	0.262258
Trial 1	M1-2	C-P	M	0:03:11.254-0:03:11.520	CS1b	0.0805976	8	0.301939
Trial 1	M1-2	C-P	M	0:03:11.520-0:03:11.786	CS1b	0.511099	8	1.91472
Trial 1	M1-2	C-P	M	0:03:11.786-0:03:12.052	CS1b	1.70365	8	6.38227
Trial 1	M1-2	C-P	M	0:03:12.052-0:03:12.318	CS1b	8.27494	8	30.9998
Trial 1	M1-2	C-P	M	0:03:12.318-0:03:12.584	CS1b	7.40839	8	27.7537
Trial 1	M1-2	C-P	M	0:03:12.584-0:03:12.850	CS1b	2.15129	8	8.05924
Trial 1	M1-2	C-P	M	0:03:12.850-0:03:13.116	CS1b	0.399237	8	1.49565
Trial 1	M1-2	C-P	M	0:03:13.116-0:03:13.382	CS1b	0.19487	8	0.73003
Trial 1	M1-2	C-P	M	0:03:13.382-0:03:13.648	CS1b	0.186218	8	0.697616
Trial 1	M1-2	C-P	M	0:03:13.648-0:03:13.914	CS1b	0.0884201	8	0.331245
Trial 1	M1-2	C-P	M	0:03:13.914-0:03:14.180	CS1b	0.131026	8	0.490859
Trial 1	M1-2	C-P	M	0:03:14.180-0:03:14.446	CS1b	0.294614	8	1.10371
Trial 1	M1-2	C-P	M	0:03:14.446-0:03:14.712	CS1b	1.03395	8	3.87344
Trial 1	M1-2	C-P	M	0:03:14.712-0:03:14.978	CS1b	0.33152	8	1.24195
Trial 1	M1-2	C-P	M	0:03:14.978-0:03:15.244	CS1b	0.331676	8	1.24256
Trial 1	M1-2	C-P	M	0:03:15.244-0:03:15.510	CS1b	1.53782	8	5.76106
Trial 1	M1-2	C-P	M	0:03:15.510-0:03:15.776	CS1b	0.932758	8	3.49436
Trial 1	M1-2	C-P	M	0:03:15.776-0:03:16.042	CS1b	2.70291	8	10.1258
Trial 1	M1-2	C-P	M	0:03:16.042-0:03:16.308	CS1b	1.4676	8	5.498
Trial 1	M1-2	C-P	M	0:03:16.308-0:03:16.574	CS1b	0.910978	8	3.41276
Trial 1	M1-2	C-P	M	0:03:16.574-0:03:16.840	CS1b	0.413549	8	1.54925
Trial 1	M1-2	C-P	M	0:03:16.840-0:03:17.106	CS1b	0.314312	8	1.1775
Trial 1	M1-2	C-P	M	0:03:17.106-0:03:17.372	CS1b	0.144487	8	0.541282
Trial 1	M1-2	C-P	M	0:03:17.372-0:03:17.638	CS1b	0.8364	8	3.13334
Trial 1	M1-2	C-P	M	0:03:17.638-0:03:17.904	CS1b	0.316306	8	1.18496
Trial 1	M1-2	C-P	M	0:03:17.904-0:03:18.170	CS1b	0.263328	8	0.986487
Trial 1	M1-2	C-P	M	0:03:18.170-0:03:18.436	CS1b	0.203417	8	0.762047
Trial 1	M1-2	C-P	M	0:03:18.436-0:03:18.702	CS1b	0.1042	8	0.390359
Trial 1	M1-2	C-P	M	0:03:18.702-0:03:18.968	CS1b	0.0886796	8	0.332213
Trial 1	M1-2	C-P	M	0:03:18.968-0:03:19.234	CS1b	0.149306	8	0.559339
Trial 1	M1-2	C-P	M	0:03:19.234-0:03:19.500	CS1b	0.114165	8	0.427692
Trial 1	M1-2	C-P	M	0:03:19.500-0:03:19.766	CS1b	0.156847	7	0.671531
Trial 1	M1-2	C-P	M	0:03:19.766-0:03:20.032	CS1b	0.151799	8	0.56868
Trial 1	M1-2	C-P	M	0:03:20.032-0:03:20.298	IT1	7.06265	8	26.4585
Trial 1	M1-2	C-P	M	0:03:20.298-0:03:20.564	IT1	14.7596	8	55.2932
Trial 1	M1-2	C-P	M	0:03:20.564-0:03:20.830	IT1	10.5574	8	39.5507
Trial 1	M1-2	C-P	M	0:03:20.830-0:03:21.096	IT1	7.51318	8	28.1462
Trial 1	M1-2	C-P	M	0:03:21.096-0:03:21.362	IT1	9.06912	8	33.9752
Trial 1	M1-2	C-P	M	0:03:21.362-0:03:21.628	IT1	8.31234	8	31.14
Trial 1	M1-2	C-P	M	0:03:21.628-0:03:21.894	IT1	4.02905	8	15.0938
Trial 1	M1-2	C-P	M	0:03:21.894-0:03:22.160	IT1	0.539401	8	2.02075
Trial 1	M1-2	C-P	M	0:03:22.160-0:03:22.426	IT1	2.14093	8	8.02044
Trial 1	M1-2	C-P	M	0:03:22.426-0:03:22.692	IT1	2.0737	8	7.76858
Trial 1	M1-2	C-P	M	0:03:22.692-0:03:22.958	IT1	0.756901	8	2.83554
Trial 1	M1-2	C-P	M	0:03:22.958-0:03:23.224	IT1	0.469047	8	1.75716
Trial 1	M1-2	C-P	M	0:03:23.224-0:03:23.490	IT1	0.134372	8	0.503396
Trial 1	M1-2	C-P	M	0:03:23.490-0:03:23.756	IT1	0.22743	8	0.852011
Trial 1	M1-2	C-P	M	0:03:23.756-0:03:24.022	IT1	0.0528985	8	0.198173
Trial 1	M1-2	C-P	M	0:03:24.022-0:03:24.288	IT1	0.0881883	8	0.330374
Trial 1	M1-2	C-P	M	0:03:24.288-0:03:24.554	IT1	0.0644724	8	0.241531
Trial 1	M1-2	C-P	M	0:03:24.554-0:03:24.820	IT1	0.0436753	8	0.163618
Trial 1	M1-2	C-P	M	0:03:24.820-0:03:25.086	IT1	0.317136	8	1.18807
Trial 1	M1-2	C-P	M	0:03:25.086-0:03:25.352	IT1	0.25439	8	0.953013
Trial 1	M1-2	C-P	M	0:03:25.352-0:03:25.618	IT1	0.317459	8	1.18928
Trial 1	M1-2	C-P	M	0:03:25.618-0:03:25.884	IT1	0.0974171	8	0.364946
Trial 1	M1-2	C-P	M	0:03:25.884-0:03:26.150	IT1	0.0663754	8	0.248663
Trial 1	M1-2	C-P	M	0:03:26.150-0:03:26.416	IT1	0.0789135	8	0.295629
Trial 1	M1-2	C-P	M	0:03:26.416-0:03:26.682	IT1	0.0626565	8	0.234726
Trial 1	M1-2	C-P	M	0:03:26.682-0:03:26.948	IT1	0.0872538	8	0.326876
Trial 1	M1-2	C-P	M	0:03:26.948-0:03:27.214	IT1	0.255822	8	0.958372
Trial 1	M1-2	C-P	M	0:03:27.214-0:03:27.480	IT1	0.231538	8	0.867407
Trial 1	M1-2	C-P	M	0:03:27.480-0:03:27.746	IT1	0.205779	8	0.770898
Trial 1	M1-2	C-P	M	0:03:27.746-0:03:28.012	IT1	0.371807	8	1.39288
Trial 1	M1-2	C-P	M	0:03:28.012-0:03:28.278	IT1	0.269127	8	1.00821
Trial 1	M1-2	C-P	M	0:03:28.278-0:03:28.544	IT1	0.249733	8	0.93556
Trial 1	M1-2	C-P	M	0:03:28.544-0:03:28.810	IT1	0.0423394	8	0.158613
Trial 1	M1-2	C-P	M	0:03:28.810-0:03:29.076	IT1	0.06129	8	0.22961
Trial 1	M1-2	C-P	M	0:03:29.076-0:03:29.342	IT1	0.0214763	7	0.0919492
Trial 1	M1-2	C-P	M	0:03:29.342-0:03:29.608	IT1	0.0243553	8	0.091241
Trial 1	M1-2	C-P	M	0:03:29.608-0:03:29.874	IT1	0.179653	8	0.673023
Trial 1	M1-2	C-P	M	0:03:29.874-0:03:30.140	IT1	0.191821	8	0.718608
Trial 1	M1-2	C-P	M	0:03:30.140-0:03:30.406	IT1	0.177131	8	0.663573
Trial 1	M1-2	C-P	M	0:03:30.406-0:03:30.672	IT1	0.0612753	8	0.229554
Trial 1	M1-2	C-P	M	0:03:30.672-0:03:30.938	IT1	0.117011	8	0.438353
Trial 1	M1-2	C-P	M	0:03:30.938-0:03:31.204	IT1	0.0551326	8	0.20654
Trial 1	M1-2	C-P	M	0:03:31.204-0:03:31.470	IT1	0.0623776	8	0.233682
Trial 1	M1-2	C-P	M	0:03:31.470-0:03:31.736	IT1	0.0381623	8	0.142967
Trial 1	M1-2	C-P	M	0:03:31.736-0:03:32.002	IT1	0.0208736	8	0.0781975
Trial 1	M1-2	C-P	M	0:03:32.002-0:03:32.268	IT1	0.135457	8	0.50746
Trial 1	M1-2	C-P	M	0:03:32.268-0:03:32.534	IT1	0.0238708	8	0.0894271
Trial 1	M1-2	C-P	M	0:03:32.534-0:03:32.800	IT1	0.198934	8	0.74526
Trial 1	M1-2	C-P	M	0:03:32.800-0:03:33.066	IT1	0.445578	8	1.66925
Trial 1	M1-2	C-P	M	0:03:33.066-0:03:33.332	IT1	0.501531	8	1.87886
Trial 1	M1-2	C-P	M	0:03:33.332-0:03:33.598	IT1	0.504195	8	1.88884
Trial 1	M1-2	C-P	M	0:03:33.598-0:03:33.864	IT1	0.521276	8	1.95283
Trial 1	M1-2	C-P	M	0:03:33.864-0:03:34.130	IT1	0.401162	8	1.50286
Trial 1	M1-2	C-P	M	0:03:34.130-0:03:34.396	IT1	0.244536	8	0.91609
Trial 1	M1-2	C-P	M	0:03:34.396-0:03:34.662	IT1	0.137252	8	0.514178
Trial 1	M1-2	C-P	M	0:03:34.662-0:03:34.928	IT1	0.0774878	8	0.290289
Trial 1	M1-2	C-P	M	0:03:34.928-0:03:35.194	IT1	0.0600857	8	0.225097
Trial 1	M1-2	C-P	M	0:03:35.194-0:03:35.460	IT1	0.0419855	8	0.157289
Trial 1	M1-2	C-P	M	0:03:35.460-0:03:35.726	IT1	0.0447116	8	0.167502
Trial 1	M1-2	C-P	M	0:03:35.726-0:03:35.992	IT1	0.0107343	8	0.0402133
Trial 1	M1-2	C-P	M	0:03:35.992-0:03:36.258	IT1	0.125913	8	0.471705
Trial 1	M1-2	C-P	M	0:03:36.258-0:03:36.524	IT1	0.0386623	8	0.144839
Trial 1	M1-2	C-P	M	0:03:36.524-0:03:36.790	IT1	0.0493248	8	0.184782
Trial 1	M1-2	C-P	M	0:03:36.790-0:03:37.056	IT1	0.130604	8	0.489271
Trial 1	M1-2	C-P	M	0:03:37.056-0:03:37.322	IT1	0.250408	8	0.938087
Trial 1	M1-2	C-P	M	0:03:37.322-0:03:37.588	IT1	0.283189	8	1.0609
Trial 1	M1-2	C-P	M	0:03:37.588-0:03:37.854	IT1	0.495419	8	1.85596
Trial 1	M1-2	C-P	M	0:03:37.854-0:03:38.120	IT1	0.586283	8	2.19637
Trial 1	M1-2	C-P	M	0:03:38.120-0:03:38.386	IT1	0.563842	8	2.1123
Trial 1	M1-2	C-P	M	0:03:38.386-0:03:38.652	IT1	0.65175	8	2.44161
Trial 1	M1-2	C-P	M	0:03:38.652-0:03:38.918	IT1	0.542989	7	2.32477
Trial 1	M1-2	C-P	M	0:03:38.918-0:03:39.184	IT1	0.537176	8	2.0124
Trial 1	M1-2	C-P	M	0:03:39.184-0:03:39.450	IT1	0.863398	8	3.23451
Trial 1	M1-2	C-P	M	0:03:39.450-0:03:39.716	IT1	0.295879	8	1.10844
Trial 1	M1-2	C-P	M	0:03:39.716-0:03:39.982	IT1	0.668218	8	2.50331
Trial 1	M1-2	C-P	M	0:03:39.982-0:03:40.248	IT1	0.364607	8	1.36591
Trial 1	M1-2	C-P	M	0:03:40.248-0:03:40.514	IT1	0.42833	8	1.60463
Trial 1	M1-2	C-P	M	0:03:40.514-0:03:40.780	IT1	0.201604	8	0.755258
Trial 1	M1-2	C-P	M	0:03:40.780-0:03:41.046	IT1	0.190012	8	0.711835
Trial 1	M1-2	C-P	M	0:03:41.046-0:03:41.312	IT1	0.139318	8	0.52192
Trial 1	M1-2	C-P	M	0:03:41.312-0:03:41.578	IT1	0.143934	8	0.539212
Trial 1	M1-2	C-P	M	0:03:41.578-0:03:41.844	IT1	0.0553886	8	0.207499
Trial 1	M1-2	C-P	M	0:03:41.844-0:03:42.110	IT1	0.0656907	8	0.246094
Trial 1	M1-2	C-P	M	0:03:42.110-0:03:42.376	IT1	0.133059	8	0.498477
Trial 1	M1-2	C-P	M	0:03:42.376-0:03:42.642	IT1	0.0707856	8	0.265181
Trial 1	M1-2	C-P	M	0:03:42.642-0:03:42.908	IT1	0.383962	8	1.43841
Trial 1	M1-2	C-P	M	0:03:42.908-0:03:43.174	IT1	0.202526	8	0.758719
Trial 1	M1-2	C-P	M	0:03:43.174-0:03:43.440	IT1	0.316905	8	1.1872
Trial 1	M1-2	C-P	M	0:03:43.440-0:03:43.706	IT1	0.307772	8	1.15299
Trial 1	M1-2	C-P	M	0:03:43.706-0:03:43.972	IT1	0.289187	8	1.08336
Trial 1	M1-2	C-P	M	0:03:43.972-0:03:44.238	IT1	0.172801	8	0.647352
Trial 1	M1-2	C-P	M	0:03:44.238-0:03:44.504	IT1	0.0560753	8	0.210073
Trial 1	M1-2	C-P	M	0:03:44.504-0:03:44.770	IT1	0.0840134	8	0.314735
Trial 1	M1-2	C-P	M	0:03:44.770-0:03:45.036	IT1	0.0963541	8	0.360969
Trial 1	M1-2	C-P	M	0:03:45.036-0:03:45.302	IT1	0.157477	8	0.589948
Trial 1	M1-2	C-P	M	0:03:45.302-0:03:45.568	IT1	0.0579983	8	0.217279
Trial 1	M1-2	C-P	M	0:03:45.568-0:03:45.834	IT1	0.105425	8	0.394948
Trial 1	M1-2	C-P	M	0:03:45.834-0:03:46.100	IT1	0.0543154	8	0.20348
Trial 1	M1-2	C-P	M	0:03:46.100-0:03:46.366	IT1	0.071153	8	0.266556
Trial 1	M1-2	C-P	M	0:03:46.366-0:03:46.632	IT1	0.0975116	8	0.3653
Trial 1	M1-2	C-P	M	0:03:46.632-0:03:46.898	IT1	0.0857256	8	0.321147
Trial 1	M1-2	C-P	M	0:03:46.898-0:03:47.164	IT1	0.09115	8	0.341471
Trial 1	M1-2	C-P	M	0:03:47.164-0:03:47.430	IT1	0.130031	8	0.487126
Trial 1	M1-2	C-P	M	0:03:47.430-0:03:47.696	IT1	0.0487459	8	0.182613
Trial 1	M1-2	C-P	M	0:03:47.696-0:03:47.962	IT1	0.0762821	8	0.285771
Trial 1	M1-2	C-P	M	0:03:47.962-0:03:48.228	IT1	0.0603384	7	0.258333
Trial 1	M1-2	C-P	M	0:03:48.228-0:03:48.494	IT1	0.0839021	8	0.314317
Trial 1	M1-2	C-P	M	0:03:48.494-0:03:48.760	IT1	0.1136	8	0.425576
Trial 1	M1-2	C-P	M	0:03:48.760-0:03:49.026	IT1	0.0948432	8	0.355304
Trial 1	M1-2	C-P	M	0:03:49.026-0:03:49.292	IT1	0.405163	8	1.51785
Trial 1	M1-2	C-P	M	0:03:49.292-0:03:49.558	IT1	0.407561	8	1.52682
Trial 1	M1-2	C-P	M	0:03:49.558-0:03:49.824	IT1	0.895141	8	3.35341
Trial 1	M1-2	C-P	M	0:03:49.824-0:03:50.090	IT1	0.442784	8	1.65877
Trial 1	M1-2	C-P	M	0:03:50.090-0:03:50.356	IT1	0.433661	8	1.62461
Trial 1	M1-2	C-P	M	0:03:50.356-0:03:50.622	IT1	0.272833	8	1.0221
Trial 1	M1-2	C-P	M	0:03:50.622-0:03:50.888	IT1	0.290706	8	1.08906
Trial 1	M1-2	C-P	M	0:03:50.888-0:03:51.154	IT1	0.427986	8	1.60333
Trial 1	M1-2	C-P	M	0:03:51.154-0:03:51.420	IT1	0.356091	8	1.334
Trial 1	M1-2	C-P	M	0:03:51.420-0:03:51.686	IT1	0.405168	8	1.51786
Trial 1	M1-2	C-P	M	0:03:51.686-0:03:51.952	IT1	0.296115	8	1.10932
Trial 1	M1-2	C-P	M	0:03:51.952-0:03:52.218	IT1	0.207507	8	0.777376
Trial 1	M1-2	C-P	M	0:03:52.218-0:03:52.484	IT1	0.0597139	8	0.223701
Trial 1	M1-2	C-P	M	0:03:52.484-0:03:52.750	IT1	0.0318255	8	0.119228
Trial 1	M1-2	C-P	M	0:03:52.750-0:03:53.016	IT1	0.078103	8	0.292596
Trial 1	M1-2	C-P	M	0:03:53.016-0:03:53.282	IT1	0.022486	8	0.0842386
Trial 1	M1-2	C-P	M	0:03:53.282-0:03:53.548	IT1	0.360272	8	1.34967
Trial 1	M1-2	C-P	M	0:03:53.548-0:03:53.814	IT1	0.52758	8	1.97644
Trial 1	M1-2	C-P	M	0:03:53.814-0:03:54.080	IT1	0.610487	8	2.28703
Trial 1	M1-2	C-P	M	0:03:54.080-0:03:54.346	IT1	0.146925	8	0.55042
Trial 1	M1-2	C-P	M	0:03:54.346-0:03:54.612	IT1	0.495772	8	1.85729
Trial 1	M1-2	C-P	M	0:03:54.612-0:03:54.878	IT1	0.370247	8	1.38703
Trial 1	M1-2	C-P	M	0:03:54.878-0:03:55.144	IT1	0.220534	8	0.826174
Trial 1	M1-2	C-P	M	0:03:55.144-0:03:55.410	IT1	0.405541	8	1.51926
Trial 1	M1-2	C-P	M	0:03:55.410-0:03:55.676	IT1	0.254312	8	0.952713
Trial 1	M1-2	C-P	M	0:03:55.676-0:03:55.942	IT1	0.201209	8	0.75378
Trial 1	M1-2	C-P	M	0:03:55.942-0:03:56.208	IT1	0.0838475	8	0.314114
Trial 1	M1-2	C-P	M	0:03:56.208-0:03:56.474	IT1	0.0797349	8	0.298706
Trial 1	M1-2	C-P	M	0:03:56.474-0:03:56.740	IT1	0.0476543	8	0.178524
Trial 1	M1-2	C-P	M	0:03:56.740-0:03:57.006	IT1	0.030995	8	0.116114
Trial 1	M1-2	C-P	M	0:03:57.006-0:03:57.272	IT1	0.0494412	8	0.185218
Trial 1	M1-2	C-P	M	0:03:57.272-0:03:57.538	IT1	0.0208436	8	0.0780846
Trial 1	M1-2	C-P	M	0:03:57.538-0:03:57.804	IT1	0.0128379	7	0.0549644
Trial 1	M1-2	C-P	M	0:03:57.804-0:03:58.070	IT1	0.062671	8	0.234782
Trial 1	M1-2	C-P	M	0:03:58.070-0:03:58.336	IT1	0	8	0
Trial 1	M1-2	C-P	M	0:03:58.336-0:03:58.602	IT1	0.0334494	8	0.125309
Trial 1	M1-2	C-P	M	0:03:58.602-0:03:58.868	IT1	0.082046	8	0.307369
Trial 1	M1-2	C-P	M	0:03:58.868-0:03:59.134	IT1	0.36366	8	1.36235
Trial 1	M1-2	C-P	M	0:03:59.134-0:03:59.400	IT1	0.288722	8	1.08163
Trial 1	M1-2	C-P	M	0:03:59.400-0:03:59.666	IT1	0.246007	8	0.921603
Trial 1	M1-2	C-P	M	0:03:59.666-0:03:59.932	IT1	0.417045	8	1.56235
Trial 1	M1-2	C-P	M	0:03:59.932-0:04:00.198	IT1	0.420181	8	1.5741
Trial 1	M1-2	C-P	M	0:04:00.198-0:04:00.464	IT1	0.524408	8	1.96455
Trial 1	M1-2	C-P	M	0:04:00.464-0:04:00.730	IT1	0.654143	8	2.4506
Trial 1	M1-2	C-P	M	0:04:00.730-0:04:00.996	IT1	0.153855	8	0.576377
Trial 1	M1-2	C-P	M	0:04:00.996-0:04:01.262	IT1	0.775621	8	2.90567
Trial 1	M1-2	C-P	M	0:04:01.262-0:04:01.528	IT1	0.549705	8	2.05933
Trial 1	M1-2	C-P	M	0:04:01.528-0:04:01.794	IT1	0.867297	8	3.2491
Trial 1	M1-2	C-P	M	0:04:01.794-0:04:02.060	IT1	0.638917	8	2.39354
Trial 1	M1-2	C-P	M	0:04:02.060-0:04:02.326	IT1	1.02822	8	3.85199
Trial 1	M1-2	C-P	M	0:04:02.326-0:04:02.592	IT1	0.715081	8	2.67887
Trial 1	M1-2	C-P	M	0:04:02.592-0:04:02.858	IT1	0.327023	8	1.22511
Trial 1	M1-2	C-P	M	0:04:02.858-0:04:03.124	IT1	0.465839	8	1.74515
Trial 1	M1-2	C-P	M	0:04:03.124-0:04:03.390	IT1	0.599594	8	2.24623
Trial 1	M1-2	C-P	M	0:04:03.390-0:04:03.656	IT1	0.336033	8	1.25886
Trial 1	M1-2	C-P	M	0:04:03.656-0:04:03.922	IT1	0.547203	8	2.04996
Trial 1	M1-2	C-P	M	0:04:03.922-0:04:04.188	IT1	0.380839	8	1.42673
Trial 1	M1-2	C-P	M	0:04:04.188-0:04:04.454	IT1	0.139515	8	0.522656
Trial 1	M1-2	C-P	M	0:04:04.454-0:04:04.720	IT1	0.0606307	8	0.227138
Trial 1	M1-2	C-P	M	0:04:04.720-0:04:04.986	IT1	0.0782746	8	0.293235
Trial 1	M1-2	C-P	M	0:04:04.986-0:04:05.252	IT1	0.0592917	8	0.222121
Trial 1	M1-2	C-P	M	0:04:05.252-0:04:05.518	IT1	0.0340643	8	0.127613
Trial 1	M1-2	C-P	M	0:04:05.518-0:04:05.784	IT1	0.209974	8	0.786617
Trial 1	M1-2	C-P	M	0:04:05.784-0:04:06.050	IT1	0.559818	8	2.09722
Trial 1	M1-2	C-P	M	0:04:06.050-0:04:06.316	IT1	0.71795	8	2.68961
Trial 1	M1-2	C-P	M	0:04:06.316-0:04:06.582	IT1	0.462823	8	1.73385
Trial 1	M1-2	C-P	M	0:04:06.582-0:04:06.848	IT1	0.473565	8	1.77409
Trial 1	M1-2	C-P	M	0:04:06.848-0:04:07.114	IT1	0.400724	8	1.50121
Trial 1	M1-2	C-P	M	0:04:07.114-0:04:07.380	IT1	0.257853	7	1.10398
Trial 1	M1-2	C-P	M	0:04:07.380-0:04:07.646	IT1	0.21466	8	0.804176
Trial 1	M1-2	C-P	M	0:04:07.646-0:04:07.912	IT1	0.0707204	8	0.264936
Trial 1	M1-2	C-P	M	0:04:07.912-0:04:08.178	IT1	0.179019	8	0.670657
Trial 1	M1-2	C-P	M	0:04:08.178-0:04:08.444	IT1	0.0323744	8	0.121282
Trial 1	M1-2	C-P	M	0:04:08.444-0:04:08.710	IT1	0.116563	8	0.436669
Trial 1	M1-2	C-P	M	0:04:08.710-0:04:08.976	IT1	0.0905237	8	0.339125
Trial 1	M1-2	C-P	M	0:04:08.976-0:04:09.242	IT1	0.0379563	8	0.142193
Trial 1	M1-2	C-P	M	0:04:09.242-0:04:09.508	IT1	0.100383	8	0.37606
Trial 1	M1-2	C-P	M	0:04:09.508-0:04:09.774	IT1	0.032834	8	0.123003
Trial 1	M1-2	C-P	M	0:04:09.774-0:04:10.040	IT1	0.236081	8	0.88441
Trial 1	M1-2	C-P	M	0:04:10.040-0:04:10.306	IT1	0.0598606	8	0.224255
Trial 1	M1-2	C-P	M	0:04:10.306-0:04:10.572	IT1	0.741358	8	2.77731
Trial 1	M1-2	C-P	M	0:04:10.572-0:04:10.838	IT1	0.364271	8	1.36466
Trial 1	M1-2	C-P	M	0:04:10.838-0:04:11.104	IT1	0.292085	8	1.09422
Trial 1	M1-2	C-P	M	0:04:11.104-0:04:11.370	IT1	0.12331	8	0.461952
Trial 1	M1-2	C-P	M	0:04:11.370-0:04:11.636	IT1	0.0834953	8	0.312796
Trial 1	M1-2	C-P	M	0:04:11.636-0:04:11.902	IT1	0.092176	8	0.345311
Trial 1	M1-2	C-P	M	0:04:11.902-0:04:12.168	IT1	0.0391678	8	0.146731
Trial 1	M1-2	C-P	M	0:04:12.168-0:04:12.434	IT1	0.0813798	8	0.304868
Trial 1	M1-2	C-P	M	0:04:12.434-0:04:12.700	IT1	0.0590483	8	0.221208
Trial 1	M1-2	C-P	M	0:04:12.700-0:04:12.966	IT1	0.235637	8	0.882753
Trial 1	M1-2	C-P	M	0:04:12.966-0:04:13.232	IT1	0.466496	8	1.74761
Trial 1	M1-2	C-P	M	0:04:13.232-0:04:13.498	IT1	0.440666	8	1.65084
Trial 1	M1-2	C-P	M	0:04:13.498-0:04:13.764	IT1	0.390272	8	1.46205
Trial 1	M1-2	C-P	M	0:04:13.764-0:04:14.030	IT1	0.231982	8	0.869058
Trial 1	M1-2	C-P	M	0:04:14.030-0:04:14.296	IT1	0.192897	8	0.722644
Trial 1	M1-2	C-P	M	0:04:14.296-0:04:14.562	IT1	0.152	8	0.569426
Trial 1	M1-2	C-P	M	0:04:14.562-0:04:14.828	IT1	0.054686	8	0.204867
Trial 1	M1-2	C-P	M	0:04:14.828-0:04:15.094	IT1	0.0471917	8	0.176793
Trial 1	M1-2	C-P	M	0:04:15.094-0:04:15.360	IT1	0.0775489	8	0.29052
Trial 1	M1-2	C-P	M	0:04:15.360-0:04:15.626	IT1	0.156696	8	0.587026
Trial 1	M1-2	C-P	M	0:04:15.626-0:04:15.892	IT1	0.382557	8	1.43315
Trial 1	M1-2	C-P	M	0:04:15.892-0:04:16.158	IT1	0.107388	8	0.402301
Trial 1	M1-2	C-P	M	0:04:16.158-0:04:16.424	IT1	0.0947297	8	0.35488
Trial 1	M1-2	C-P	M	0:04:16.424-0:04:16.690	IT1	0.0560588	7	0.24001
Trial 1	M1-2	C-P	M	0:04:16.690-0:04:16.956	IT1	0.0174637	8	0.0654232
Trial 1	M1-2	C-P	M	0:04:16.956-0:04:17.222	IT1	0.0297476	8	0.111443
Trial 1	M1-2	C-P	M	0:04:17.222-0:04:17.488	IT1	0.073921	8	0.276926
Trial 1	M1-2	C-P	M	0:04:17.488-0:04:17.754	IT1	0.0740412	8	0.277378
Trial 1	M1-2	C-P	M	0:04:17.754-0:04:18.020	IT1	0.0840125	8	0.314732
Trial 1	M1-2	C-P	M	0:04:18.020-0:04:18.286	IT1	0.0570859	8	0.213859
Trial 1	M1-2	C-P	M	0:04:18.286-0:04:18.552	IT1	0.0693605	8	0.259843
Trial 1	M1-2	C-P	M	0:04:18.552-0:04:18.818	IT1	0.051741	8	0.193834
Trial 1	M1-2	C-P	M	0:04:18.818-0:04:19.084	IT1	0.055152	8	0.206613
Trial 1	M1-2	C-P	M	0:04:19.084-0:04:19.350	IT1	0.0461747	8	0.172983
Trial 1	M1-2	C-P	M	0:04:19.350-0:04:19.616	IT1	0.171282	8	0.641659
Trial 1	M1-2	C-P	M	0:04:19.616-0:04:19.882	IT1	0.0460417	8	0.172483
Trial 1	M1-2	C-P	M	0:04:19.882-0:04:20.148	IT1	0.0930514	8	0.348597
Trial 1	M1-2	C-P	M	0:04:20.148-0:04:20.414	IT1	0.0455965	8	0.170815
Trial 1	M1-2	C-P	M	0:04:20.414-0:04:20.680	IT1	0.0528613	8	0.198032
Trial 1	M1-2	C-P	M	0:04:20.680-0:04:20.946	IT1	0.0262838	8	0.0984672
Trial 1	M1-2	C-P	M	0:04:20.946-0:04:21.212	IT1	0.0221963	8	0.0831542
Trial 1	M1-2	C-P	M	0:04:21.212-0:04:21.478	IT1	0.0429386	8	0.160858
Trial 1	M1-2	C-P	M	0:04:21.478-0:04:21.744	IT1	0.0186803	8	0.069981
Trial 1	M1-2	C-P	M	0:04:21.744-0:04:22.010	IT1	0.0379145	8	0.142036
Trial 1	M1-2	C-P	M	0:04:22.010-0:04:22.276	IT1	0.0391522	8	0.146673
Trial 1	M1-2	C-P	M	0:04:22.276-0:04:22.542	IT1	0.0787413	8	0.294983
Trial 1	M1-2	C-P	M	0:04:22.542-0:04:22.808	IT1	0.0296099	8	0.110926
Trial 1	M1-2	C-P	M	0:04:22.808-0:04:23.074	IT1	0.0346643	8	0.129861
Trial 1	M1-2	C-P	M	0:04:23.074-0:04:23.340	IT1	0.174663	8	0.654328
Trial 1	M1-2	C-P	M	0:04:23.340-0:04:23.606	IT1	0.0268545	8	0.100603
Trial 1	M1-2	C-P	M	0:04:23.606-0:04:23.872	IT1	0.0762764	8	0.28575
Trial 1	M1-2	C-P	M	0:04:23.872-0:04:24.138	IT1	0.0701772	8	0.2629
Trial 1	M1-2	C-P	M	0:04:24.138-0:04:24.404	IT1	0.122054	8	0.45724
Trial 1	M1-2	C-P	M	0:04:24.404-0:04:24.670	IT1	0.0596919	8	0.22362
Trial 1	M1-2	C-P	M	0:04:24.670-0:04:24.936	IT1	0.200073	8	0.749523
Trial 1	M1-2	C-P	M	0:04:24.936-0:04:25.202	IT1	0.497542	8	1.86391
Trial 1	M1-2	C-P	M	0:04:25.202-0:04:25.468	IT1	0.28787	8	1.07843
Trial 1	M1-2	C-P	M	0:04:25.468-0:04:25.734	IT1	0.655335	8	2.45506
Trial 1	M1-2	C-P	M	0:04:25.734-0:04:26.000	IT1	0.461055	8	1.72723
Trial 1	M1-2	C-P	M	0:04:26.000-0:04:26.266	IT1	0.262995	7	1.12599
Trial 1	M1-2	C-P	M	0:04:26.266-0:04:26.532	IT1	0.366505	8	1.37302
Trial 1	M1-2	C-P	M	0:04:26.532-0:04:26.798	IT1	0.320885	8	1.20211
Trial 1	M1-2	C-P	M	0:04:26.798-0:04:27.064	IT1	0.480933	8	1.8017
Trial 1	M1-2	C-P	M	0:04:27.064-0:04:27.330	IT1	0.168625	8	0.631715
Trial 1	M1-2	C-P	M	0:04:27.330-0:04:27.596	IT1	0.335337	8	1.25625
Trial 1	M1-2	C-P	M	0:04:27.596-0:04:27.862	IT1	0.359666	8	1.3474
Trial 1	M1-2	C-P	M	0:04:27.862-0:04:28.128	IT1	0.32476	8	1.21663
Trial 1	M1-2	C-P	M	0:04:28.128-0:04:28.394	IT1	0.356251	8	1.3346
Trial 1	M1-2	C-P	M	0:04:28.394-0:04:28.660	IT1	0.589606	8	2.2088
Trial 1	M1-2	C-P	M	0:04:28.660-0:04:28.926	IT1	0.192205	8	0.72005
Trial 1	M1-2	C-P	M	0:04:28.926-0:04:29.192	IT1	0.183288	8	0.686642
Trial 1	M1-2	C-P	M	0:04:29.192-0:04:29.458	IT1	0.0981782	8	0.367797
Trial 1	M1-2	C-P	M	0:04:29.458-0:04:29.724	IT1	0.0897299	8	0.336149
Trial 1	M1-2	C-P	M	0:04:29.724-0:04:29.990	IT1	0.0516121	8	0.19335
Trial 1	M1-2	C-P	M	0:04:29.990-0:04:30.256	IT1	0.0187606	8	0.0702812
Trial 1	M1-2	C-P	M	0:04:30.256-0:04:30.522	IT1	0.107821	8	0.403921
Trial 1	M1-2	C-P	M	0:04:30.522-0:04:30.788	IT1	0.163063	8	0.610877
Trial 1	M1-2	C-P	M	0:04:30.788-0:04:31.054	IT1	0.151854	8	0.568881
Trial 1	M1-2	C-P	M	0:04:31.054-0:04:31.320	IT1	0.441797	8	1.65509
Trial 1	M1-2	C-P	M	0:04:31.320-0:04:31.586	IT1	0.257249	8	0.963718
Trial 1	M1-2	C-P	M	0:04:31.586-0:04:31.852	IT1	0.456098	8	1.70865
Trial 1	M1-2	C-P	M	0:04:31.852-0:04:32.118	IT1	0.275322	8	1.03142
Trial 1	M1-2	C-P	M	0:04:32.118-0:04:32.384	IT1	0.134124	8	0.502466
Trial 1	M1-2	C-P	M	0:04:32.384-0:04:32.650	IT1	0.117942	8	0.441839
Trial 1	M1-2	C-P	M	0:04:32.650-0:04:32.916	IT1	0.0420808	8	0.157644
Trial 1	M1-2	C-P	M	0:04:32.916-0:04:33.182	IT1	0.0500291	8	0.187422
Trial 1	M1-2	C-P	M	0:04:33.182-0:04:33.448	IT1	0.148182	8	0.555125
Trial 1	M1-2	C-P	M	0:04:33.448-0:04:33.714	IT1	0.0707461	8	0.265032
Trial 1	M1-2	C-P	M	0:04:33.714-0:04:33.980	IT1	0.135524	8	0.507705
Trial 1	M1-2	C-P	M	0:04:33.980-0:04:34.246	IT1	0.0947299	8	0.354882
Trial 1	M1-2	C-P	M	0:04:34.246-0:04:34.512	IT1	0.103442	8	0.387517
Trial 1	M1-2	C-P	M	0:04:34.512-0:04:34.778	IT1	0.0688261	8	0.257842
Trial 1	M1-2	C-P	M	0:04:34.778-0:04:35.044	IT1	0.0713564	8	0.267321
Trial 1	M1-2	C-P	M	0:04:35.044-0:04:35.310	IT1	0.0501101	8	0.187729
Trial 1	M1-2	C-P	M	0:04:35.310-0:04:35.576	IT1	0.0469397	8	0.175846
Trial 1	M1-2	C-P	M	0:04:35.576-0:04:35.842	IT1	0.0899534	7	0.385129
Trial 1	M1-2	C-P	M	0:04:35.842-0:04:36.108	IT1	0.0632723	8	0.237034
Trial 1	M1-2	C-P	M	0:04:36.108-0:04:36.374	IT1	0.26337	8	0.986655
Trial 1	M1-2	C-P	M	0:04:36.374-0:04:36.640	IT1	0.565717	8	2.11932
Trial 1	M1-2	C-P	M	0:04:36.640-0:04:36.906	IT1	0.342023	8	1.28131
Trial 1	M1-2	C-P	M	0:04:36.906-0:04:37.172	IT1	0.314448	8	1.17799
Trial 1	M1-2	C-P	M	0:04:37.172-0:04:37.438	IT1	0.452011	8	1.69336
Trial 1	M1-2	C-P	M	0:04:37.438-0:04:37.704	IT1	0.388119	8	1.45398
Trial 1	M1-2	C-P	M	0:04:37.704-0:04:37.970	IT1	0.445297	8	1.66819
Trial 1	M1-2	C-P	M	0:04:37.970-0:04:38.236	IT1	0.509093	8	1.90719
Trial 1	M1-2	C-P	M	0:04:38.236-0:04:38.502	IT1	0.33574	8	1.25777
Trial 1	M1-2	C-P	M	0:04:38.502-0:04:38.768	IT1	0.311665	8	1.16757
Trial 1	M1-2	C-P	M	0:04:38.768-0:04:39.034	IT1	0.189925	8	0.711507
Trial 1	M1-2	C-P	M	0:04:39.034-0:04:39.300	IT1	0.18717	8	0.701185
Trial 1	M1-2	C-P	M	0:04:39.300-0:04:39.566	IT1	0.0729359	8	0.273236
Trial 1	M1-2	C-P	M	0:04:39.566-0:04:39.832	IT1	0.0435864	8	0.163285
Trial 1	M1-2	C-P	M	0:04:39.832-0:04:40.098	IT1	0.112593	8	0.421804
Trial 1	M1-2	C-P	M	0:04:40.098-0:04:40.364	IT1	0.0613106	8	0.229684
Trial 1	M1-2	C-P	M	0:04:40.364-0:04:40.630	IT1	0.0761456	8	0.285261
Trial 1	M1-2	C-P	M	0:04:40.630-0:04:40.896	IT1	0.0397509	8	0.148917
Trial 1	M1-2	C-P	M	0:04:40.896-0:04:41.162	IT1	0.0456145	8	0.170883
Trial 1	M1-2	C-P	M	0:04:41.162-0:04:41.428	IT1	0.0284839	8	0.106708
Trial 1	M1-2	C-P	M	0:04:41.428-0:04:41.694	IT1	0.0908272	8	0.340259
Trial 1	M1-2	C-P	M	0:04:41.694-0:04:41.960	IT1	0.0187645	8	0.0702981
Trial 1	M1-2	C-P	M	0:04:41.960-0:04:42.226	IT1	0.0379738	8	0.142261
Trial 1	M1-2	C-P	M	0:04:42.226-0:04:42.492	IT1	0.0178362	8	0.0668198
Trial 1	M1-2	C-P	M	0:04:42.492-0:04:42.758	IT1	0.022006	8	0.0824397
Trial 1	M1-2	C-P	M	0:04:42.758-0:04:43.024	IT1	0.0227375	8	0.0851797
Trial 1	M1-2	C-P	M	0:04:43.024-0:04:43.290	IT1	0.0147972	8	0.0554346
Trial 1	M1-2	C-P	M	0:04:43.290-0:04:43.556	IT1	0.08953	8	0.335399
Trial 1	M1-2	C-P	M	0:04:43.556-0:04:43.822	IT1	0.0330512	8	0.123818
Trial 1	M1-2	C-P	M	0:04:43.822-0:04:44.088	IT1	0.11941	8	0.447347
Trial 1	M1-2	C-P	M	0:04:44.088-0:04:44.354	IT1	0.041012	8	0.15364
Trial 1	M1-2	C-P	M	0:04:44.354-0:04:44.620	IT1	0.272302	8	1.02011
Trial 1	M1-2	C-P	M	0:04:44.620-0:04:44.886	IT1	0.458109	8	1.71621
Trial 1	M1-2	C-P	M	0:04:44.886-0:04:45.152	IT1	0.131741	8	0.493535
Trial 1	M1-2	C-P	M	0:04:45.152-0:04:45.418	IT1	0.0742322	7	0.317817
Trial 1	M1-2	C-P	M	0:04:45.418-0:04:45.684	IT1	0.104651	8	0.392049
Trial 1	M1-2	C-P	M	0:04:45.684-0:04:45.950	IT1	0.0907533	8	0.339983
Trial 1	M1-2	C-P	M	0:04:45.950-0:04:46.216	IT1	0.0630413	8	0.236169
Trial 1	M1-2	C-P	M	0:04:46.216-0:04:46.482	IT1	0.0413618	8	0.15495
Trial 1	M1-2	C-P	M	0:04:46.482-0:04:46.748	IT1	0.030938	8	0.115901
Trial 1	M1-2	C-P	M	0:04:46.748-0:04:47.014	IT1	0.0244915	8	0.0917515
Trial 1	M1-2	C-P	M	0:04:47.014-0:04:47.280	IT1	0.110921	8	0.415542
Trial 1	M1-2	C-P	M	0:04:47.280-0:04:47.546	IT1	0.0368314	8	0.137978
Trial 1	M1-2	C-P	M	0:04:47.546-0:04:47.812	IT1	0.0832388	8	0.311834
Trial 1	M1-2	C-P	M	0:04:47.812-0:04:48.078	IT1	0.0798906	8	0.29929
Trial 1	M1-2	C-P	M	0:04:48.078-0:04:48.344	IT1	0.0933575	8	0.349742
Trial 1	M1-2	C-P	M	0:04:48.344-0:04:48.610	IT1	0.0318881	8	0.11946
Trial 1	M1-2	C-P	M	0:04:48.610-0:04:48.876	IT1	0.0306486	8	0.114818
Trial 1	M1-2	C-P	M	0:04:48.876-0:04:49.142	IT1	0.0652008	8	0.244257
Trial 1	M1-2	C-P	M	0:04:49.142-0:04:49.408	IT1	0.0548105	8	0.205332
Trial 1	M1-2	C-P	M	0:04:49.408-0:04:49.674	IT1	0.0664314	8	0.248867
Trial 1	M1-2	C-P	M	0:04:49.674-0:04:49.940	IT1	0.0417423	8	0.156376
Trial 1	M1-2	C-P	M	0:04:49.940-0:04:50.206	IT1	0.139268	8	0.521736
Trial 1	M1-2	C-P	M	0:04:50.206-0:04:50.472	IT1	0.35648	8	1.33546
Trial 1	M1-2	C-P	M	0:04:50.472-0:04:50.738	IT1	0.406865	8	1.52421
Trial 1	M1-2	C-P	M	0:04:50.738-0:04:51.004	IT1	0.343725	8	1.28769
Trial 1	M1-2	C-P	M	0:04:51.004-0:04:51.270	IT1	0.410319	8	1.53715
Trial 1	M1-2	C-P	M	0:04:51.270-0:04:51.536	IT1	0.486287	8	1.82175
Trial 1	M1-2	C-P	M	0:04:51.536-0:04:51.802	IT1	0.315643	8	1.18248
Trial 1	M1-2	C-P	M	0:04:51.802-0:04:52.068	IT1	0.206229	8	0.772582
Trial 1	M1-2	C-P	M	0:04:52.068-0:04:52.334	IT1	0.349998	8	1.31118
Trial 1	M1-2	C-P	M	0:04:52.334-0:04:52.600	IT1	0.111873	8	0.419104
Trial 1	M1-2	C-P	M	0:04:52.600-0:04:52.866	IT1	0.228755	8	0.856969
Trial 1	M1-2	C-P	M	0:04:52.866-0:04:53.132	IT1	0.0683208	8	0.25595
Trial 1	M1-2	C-P	M	0:04:53.132-0:04:53.398	IT1	0.0301681	8	0.113016
Trial 1	M1-2	C-P	M	0:04:53.398-0:04:53.664	IT1	0.0573851	8	0.214979
Trial 1	M1-2	C-P	M	0:04:53.664-0:04:53.930	IT1	0.104379	8	0.391026
Trial 1	M1-2	C-P	M	0:04:53.930-0:04:54.196	IT1	0.0291572	8	0.10923
Trial 1	M1-2	C-P	M	0:04:54.196-0:04:54.462	IT1	0.0598692	8	0.224284
Trial 1	M1-2	C-P	M	0:04:54.462-0:04:54.728	IT1	0.176064	7	0.753803
Trial 1	M1-2	C-P	M	0:04:54.728-0:04:54.994	IT1	0.248607	8	0.93134
Trial 1	M1-2	C-P	M	0:04:54.994-0:04:55.260	IT1	0.288296	8	1.08003
Trial 1	M1-2	C-P	M	0:04:55.260-0:04:55.526	IT1	0.301979	8	1.13129
Trial 1	M1-2	C-P	M	0:04:55.526-0:04:55.792	IT1	0.273468	8	1.02448
Trial 1	M1-2	C-P	M	0:04:55.792-0:04:56.058	IT1	0.255482	8	0.957108
Trial 1	M1-2	C-P	M	0:04:56.058-0:04:56.324	IT1	0.482581	8	1.80787
Trial 1	M1-2	C-P	M	0:04:56.324-0:04:56.590	IT1	0.535068	8	2.00449
Trial 1	M1-2	C-P	M	0:04:56.590-0:04:56.856	IT1	0.474743	8	1.7785
Trial 1	M1-2	C-P	M	0:04:56.856-0:04:57.122	IT1	0.341928	8	1.28096
Trial 1	M1-2	C-P	M	0:04:57.122-0:04:57.388	IT1	0.647981	8	2.42752
Trial 1	M1-2	C-P	M	0:04:57.388-0:04:57.654	IT1	0.66719	8	2.49945
Trial 1	M1-2	C-P	M	0:04:57.654-0:04:57.920	IT1	0.512214	8	1.91889
Trial 1	M1-2	C-P	M	0:04:57.920-0:04:58.186	IT1	0.587101	8	2.19941
Trial 1	M1-2	C-P	M	0:04:58.186-0:04:58.452	IT1	0.339173	8	1.27063
Trial 1	M1-2	C-P	M	0:04:58.452-0:04:58.718	IT1	0.29231	8	1.09506
Trial 1	M1-2	C-P	M	0:04:58.718-0:04:58.984	IT1	0.367291	8	1.37596
Trial 1	M1-2	C-P	M	0:04:58.984-0:04:59.250	IT1	0.313056	8	1.17279
Trial 1	M1-2	C-P	M	0:04:59.250-0:04:59.516	IT1	0.218672	8	0.8192
Trial 1	M1-2	C-P	M	0:04:59.516-0:04:59.782	IT1	0.0656006	8	0.245755
Trial 1	M1-2	C-P	M	0:04:59.782-0:05:00.048	IT1	0.0458266	8	0.171677
Trial 1	M1-2	C-P	M	0:05:00.048-0:05:00.314	IT1	0.0440088	8	0.164868
Trial 1	M1-2	C-P	M	0:05:00.314-0:05:00.580	IT1	0.0407498	8	0.152659
Trial 1	M1-2	C-P	M	0:05:00.580-0:05:00.846	IT1	0.0273403	8	0.102424
Trial 1	M1-2	C-P	M	0:05:00.846-0:05:01.112	IT1	0.049302	8	0.184698
Trial 1	M1-2	C-P	M	0:05:01.112-0:05:01.378	IT1	0.121118	8	0.453737
Trial 1	M1-2	C-P	M	0:05:01.378-0:05:01.644	IT1	0.228936	8	0.857646
Trial 1	M1-2	C-P	M	0:05:01.644-0:05:01.910	IT1	0.280436	8	1.05058
Trial 1	M1-2	C-P	M	0:05:01.910-0:05:02.176	IT1	0.381181	8	1.42799
Trial 1	M1-2	C-P	M	0:05:02.176-0:05:02.442	IT1	0.28457	8	1.06607
Trial 1	M1-2	C-P	M	0:05:02.442-0:05:02.708	IT1	0.159658	8	0.598115
Trial 1	M1-2	C-P	M	0:05:02.708-0:05:02.974	IT1	0.0580466	8	0.217457
Trial 1	M1-2	C-P	M	0:05:02.974-0:05:03.240	IT1	0.027347	8	0.102448
Trial 1	M1-2	C-P	M	0:05:03.240-0:05:03.506	IT1	0.113778	8	0.426242
Trial 1	M1-2	C-P	M	0:05:03.506-0:05:03.772	IT1	0.0366393	8	0.13726
Trial 1	M1-2	C-P	M	0:05:03.772-0:05:04.038	IT1	0.0787429	8	0.294989
Trial 1	M1-2	C-P	M	0:05:04.038-0:05:04.304	IT1	0.0802402	7	0.343544
Trial 1	M1-2	C-P	M	0:05:04.304-0:05:04.570	IT1	0.128904	8	0.482905
Trial 1	M1-2	C-P	M	0:05:04.570-0:05:04.836	IT1	0.13441	8	0.503539
Trial 1	M1-2	C-P	M	0:05:04.836-0:05:05.102	IT1	0.107984	8	0.404533
Trial 1	M1-2	C-P	M	0:05:05.102-0:05:05.368	IT1	0.149727	8	0.56092
Trial 1	M1-2	C-P	M	0:05:05.368-0:05:05.634	IT1	0.0271392	8	0.10167
Trial 1	M1-2	C-P	M	0:05:05.634-0:05:05.900	IT1	0.0875158	8	0.327857
Trial 1	M1-2	C-P	M	0:05:05.900-0:05:06.166	IT1	0.0238186	8	0.0892312
Trial 1	M1-2	C-P	M	0:05:06.166-0:05:06.432	IT1	0.0785523	8	0.294276
Trial 1	M1-2	C-P	M	0:05:06.432-0:05:06.698	IT1	0.793404	8	2.97228
Trial 1	M1-2	C-P	M	0:05:06.698-0:05:06.964	IT1	0.414837	8	1.55408
Trial 1	M1-2	C-P	M	0:05:06.964-0:05:07.230	IT1	0.312074	8	1.16911
Trial 1	M1-2	C-P	M	0:05:07.230-0:05:07.496	IT1	0.260576	8	0.976179
Trial 1	M1-2	C-P	M	0:05:07.496-0:05:07.762	IT1	0.367323	8	1.37608
Trial 1	M1-2	C-P	M	0:05:07.762-0:05:08.028	IT1	0.115803	8	0.433828
Trial 1	M1-2	C-P	M	0:05:08.028-0:05:08.294	IT1	0.212723	8	0.796913
Trial 1	M1-2	C-P	M	0:05:08.294-0:05:08.560	IT1	0.0962619	8	0.360622
Trial 1	M1-2	C-P	M	0:05:08.560-0:05:08.826	IT1	0.107647	8	0.403269
Trial 1	M1-2	C-P	M	0:05:08.826-0:05:09.092	IT1	0.0388364	8	0.145492
Trial 1	M1-2	C-P	M	0:05:09.092-0:05:09.358	IT1	0.1191	8	0.446176
Trial 1	M1-2	C-P	M	0:05:09.358-0:05:09.624	IT1	0.0814097	8	0.304982
Trial 1	M1-2	C-P	M	0:05:09.624-0:05:09.890	IT1	0.123376	8	0.462197
Trial 1	M1-2	C-P	M	0:05:09.890-0:05:10.156	IT1	0.175281	8	0.656654
Trial 1	M1-2	C-P	M	0:05:10.156-0:05:10.422	IT1	0.0783702	8	0.293592
Trial 1	M1-2	C-P	M	0:05:10.422-0:05:10.688	IT1	0.17419	8	0.652562
Trial 1	M1-2	C-P	M	0:05:10.688-0:05:10.954	IT1	0.141464	8	0.529955
Trial 1	M1-2	C-P	M	0:05:10.954-0:05:11.220	IT1	0.058269	8	0.218291
Trial 1	M1-2	C-P	M	0:05:11.220-0:05:11.486	IT1	0.0656878	8	0.246083
Trial 1	M1-2	C-P	M	0:05:11.486-0:05:11.752	IT1	0.0801033	8	0.300085
Trial 1	M1-2	C-P	M	0:05:11.752-0:05:12.018	IT1	0.0479668	8	0.179699
Trial 1	M1-2	C-P	M	0:05:12.018-0:05:12.284	IT1	0.0609236	8	0.228235
Trial 1	M1-2	C-P	M	0:05:12.284-0:05:12.550	IT1	0.134868	8	0.505247
Trial 1	M1-2	C-P	M	0:05:12.550-0:05:12.816	IT1	0.0276931	8	0.103744
Trial 1	M1-2	C-P	M	0:05:12.816-0:05:13.082	IT1	0.0918223	8	0.343987
Trial 1	M1-2	C-P	M	0:05:13.082-0:05:13.348	IT1	0.0702827	8	0.263301
Trial 1	M1-2	C-P	M	0:05:13.348-0:05:13.614	IT1	0.0758936	8	0.284315
Trial 1	M1-2	C-P	M	0:05:13.614-0:05:13.880	IT1	0.0453289	7	0.194071
Trial 1	M1-2	C-P	M	0:05:13.880-0:05:14.146	IT1	0.051592	8	0.193277
Trial 1	M1-2	C-P	M	0:05:14.146-0:05:14.412	IT1	0.0429344	8	0.160845
Trial 1	M1-2	C-P	M	0:05:14.412-0:05:14.678	IT1	0.0144085	8	0.0539773
Trial 1	M1-2	C-P	M	0:05:14.678-0:05:14.944	IT1	0.0638799	8	0.239312
Trial 1	M1-2	C-P	M	0:05:14.944-0:05:15.210	IT1	0.00707857	8	0.0265179
Trial 1	M1-2	C-P	M	0:05:15.210-0:05:15.476	IT1	0.102024	8	0.382208
Trial 1	M1-2	C-P	M	0:05:15.476-0:05:15.742	IT1	0.0216177	8	0.0809858
Trial 1	M1-2	C-P	M	0:05:15.742-0:05:16.008	IT1	0.111272	8	0.416848
Trial 1	M1-2	C-P	M	0:05:16.008-0:05:16.274	IT1	0.0413366	8	0.154856
Trial 1	M1-2	C-P	M	0:05:16.274-0:05:16.540	IT1	0.100438	8	0.376261
Trial 1	M1-2	C-P	M	0:05:16.540-0:05:16.806	IT1	0.178251	8	0.667778
Trial 1	M1-2	C-P	M	0:05:16.806-0:05:17.072	IT1	0.0101483	8	0.038019
Trial 1	M1-2	C-P	M	0:05:17.072-0:05:17.338	IT1	0.048522	8	0.181776
Trial 1	M1-2	C-P	M	0:05:17.338-0:05:17.604	IT1	0.0865316	8	0.324166
Trial 1	M1-2	C-P	M	0:05:17.604-0:05:17.870	IT1	0.0353623	8	0.132477
Trial 1	M1-2	C-P	M	0:05:17.870-0:05:18.136	IT1	0.0267343	8	0.100153
Trial 1	M1-2	C-P	M	0:05:18.136-0:05:18.402	IT1	0.166529	8	0.623855
Trial 1	M1-2	C-P	M	0:05:18.402-0:05:18.668	IT1	0.0877979	8	0.328911
Trial 1	M1-2	C-P	M	0:05:18.668-0:05:18.934	IT1	0.0387575	8	0.145195
Trial 1	M1-2	C-P	M	0:05:18.934-0:05:19.200	IT1	0.0306517	8	0.114828
Trial 1	M1-2	C-P	M	0:05:19.200-0:05:19.466	IT1	0.290553	8	1.08849
Trial 1	M1-2	C-P	M	0:05:19.466-0:05:19.732	IT1	0.34053	8	1.2757
Trial 1	M1-2	C-P	M	0:05:19.732-0:05:19.998	IT1	0.472834	8	1.77134
Trial 1	M1-2	C-P	M	0:05:19.998-0:05:20.264	IT1	0.543306	8	2.03537
Trial 1	M1-2	C-P	M	0:05:20.264-0:05:20.530	IT1	0.419162	8	1.57028
Trial 1	M1-2	C-P	M	0:05:20.530-0:05:20.796	IT1	0.393274	8	1.4733
Trial 1	M1-2	C-P	M	0:05:20.796-0:05:21.062	IT1	0.254573	8	0.953689
Trial 1	M1-2	C-P	M	0:05:21.062-0:05:21.328	IT1	0.236473	8	0.885888
Trial 1	M1-2	C-P	M	0:05:21.328-0:05:21.594	IT1	0.071774	8	0.268883
Trial 1	M1-2	C-P	M	0:05:21.594-0:05:21.860	IT1	0.0928122	8	0.347702
Trial 1	M1-2	C-P	M	0:05:21.860-0:05:22.126	IT1	0.14764	8	0.553094
Trial 1	M1-2	C-P	M	0:05:22.126-0:05:22.392	IT1	0.0776998	8	0.29108
Trial 1	M1-2	C-P	M	0:05:22.392-0:05:22.658	IT1	0.0934	8	0.349901
Trial 1	M1-2	C-P	M	0:05:22.658-0:05:22.924	IT1	0.0124245	8	0.0465452
Trial 1	M1-2	C-P	M	0:05:22.924-0:05:23.190	IT1	0.0600099	8	0.224815
Trial 1	M1-2	C-P	M	0:05:23.190-0:05:23.456	IT1	0.068224	7	0.292096
Trial 1	M1-2	C-P	M	0:05:23.456-0:05:23.722	IT1	0.0312642	8	0.117125
Trial 1	M1-2	C-P	M	0:05:23.722-0:05:23.988	IT1	0.0380077	8	0.142387
Trial 1	M1-2	C-P	M	0:05:23.988-0:05:24.254	IT1	0.0328426	8	0.123037
Trial 1	M1-2	C-P	M	0:05:24.254-0:05:24.520	IT1	0.0642407	8	0.240662
Trial 1	M1-2	C-P	M	0:05:24.520-0:05:24.786	IT1	0.0320785	8	0.120174
Trial 1	M1-2	C-P	M	0:05:24.786-0:05:25.052	IT1	0.157889	8	0.591487
Trial 1	M1-2	C-P	M	0:05:25.052-0:05:25.318	IT1	0.0488393	8	0.182963
Trial 1	M1-2	C-P	M	0:05:25.318-0:05:25.584	IT1	0.100173	8	0.375273
Trial 1	M1-2	C-P	M	0:05:25.584-0:05:25.850	IT1	0.278426	8	1.04305
Trial 1	M1-2	C-P	M	0:05:25.850-0:05:26.116	IT1	0.309242	8	1.1585
Trial 1	M1-2	C-P	M	0:05:26.116-0:05:26.382	IT1	0.273373	8	1.02412
Trial 1	M1-2	C-P	M	0:05:26.382-0:05:26.648	IT1	0.243681	8	0.912887
Trial 1	M1-2	C-P	M	0:05:26.648-0:05:26.914	IT1	0.222929	8	0.835151
Trial 1	M1-2	C-P	M	0:05:26.914-0:05:27.180	IT1	0.0188017	8	0.0704353
Trial 1	M1-2	C-P	M	0:05:27.180-0:05:27.446	IT1	0.0451689	8	0.169213
Trial 1	M1-2	C-P	M	0:05:27.446-0:05:27.712	IT1	0.0208054	8	0.0779431
Trial 1	M1-2	C-P	M	0:05:27.712-0:05:27.978	IT1	0.0353685	8	0.1325
Trial 1	M1-2	C-P	M	0:05:27.978-0:05:28.244	IT1	0.0657254	8	0.246224
Trial 1	M1-2	C-P	M	0:05:28.244-0:05:28.510	IT1	0.124571	8	0.466682
Trial 1	M1-2	C-P	M	0:05:28.510-0:05:28.776	IT1	0.0479085	8	0.179476
Trial 1	M1-2	C-P	M	0:05:28.776-0:05:29.042	IT1	0.178072	8	0.667113
Trial 1	M1-2	C-P	M	0:05:29.042-0:05:29.308	IT1	0.189533	8	0.710035
Trial 1	M1-2	C-P	M	0:05:29.308-0:05:29.574	IT1	0.323072	8	1.21032
Trial 1	M1-2	C-P	M	0:05:29.574-0:05:29.840	IT1	0.17598	8	0.659261
Trial 1	M1-2	C-P	M	0:05:29.840-0:05:30.106	IT1	0.0340877	8	0.1277
Trial 1	M1-2	C-P	M	0:05:30.106-0:05:30.372	IT1	0.163681	8	0.613188
Trial 1	M1-2	C-P	M	0:05:30.372-0:05:30.638	IT1	0.206186	8	0.772417
Trial 1	M1-2	C-P	M	0:05:30.638-0:05:30.904	IT1	0.0920714	8	0.344924
Trial 1	M1-2	C-P	M	0:05:30.904-0:05:31.170	IT1	0.0970687	8	0.363644
Trial 1	M1-2	C-P	M	0:05:31.170-0:05:31.436	IT1	0.0368667	8	0.138111
Trial 1	M1-2	C-P	M	0:05:31.436-0:05:31.702	IT1	0.0396042	8	0.148366
Trial 1	M1-2	C-P	M	0:05:31.702-0:05:31.968	IT1	0.0257527	8	0.0964775
Trial 1	M1-2	C-P	M	0:05:31.968-0:05:32.234	IT1	0.236611	8	0.886419
Trial 1	M1-2	C-P	M	0:05:32.234-0:05:32.500	IT1	0.0558117	8	0.209083
Trial 1	M1-2	C-P	M	0:05:32.500-0:05:32.766	IT1	0.0855251	7	0.366168
Trial 1	M1-2	C-P	M	0:05:32.766-0:05:33.032	IT1	0.0645723	8	0.241902
Trial 1	M1-2	C-P	M	0:05:33.032-0:05:33.298	IT1	0.0140646	8	0.0526897
Trial 1	M1-2	C-P	M	0:05:33.298-0:05:33.564	IT1	0.108068	8	0.404848
Trial 1	M1-2	C-P	M	0:05:33.564-0:05:33.830	IT1	0.0450213	8	0.168663
Trial 1	M1-2	C-P	M	0:05:33.830-0:05:34.096	IT1	0.0623045	8	0.233408
Trial 1	M1-2	C-P	M	0:05:34.096-0:05:34.362	IT1	0.0252304	8	0.0945188
Trial 1	M1-2	C-P	M	0:05:34.362-0:05:34.628	IT1	0.0400594	8	0.150071
Trial 1	M1-2	C-P	M	0:05:34.628-0:05:34.894	IT1	0.113562	8	0.42543
Trial 1	M1-2	C-P	M	0:05:34.894-0:05:35.160	IT1	0.0500719	8	0.187584
Trial 1	M1-2	C-P	M	0:05:35.160-0:05:35.426	IT1	0.0275682	8	0.103276
Trial 1	M1-2	C-P	M	0:05:35.426-0:05:35.692	IT1	0.065053	8	0.243703
Trial 1	M1-2	C-P	M	0:05:35.692-0:05:35.958	IT1	0.0568585	8	0.21301
Trial 1	M1-2	C-P	M	0:05:35.958-0:05:36.224	IT1	0.100045	8	0.374793
Trial 1	M1-2	C-P	M	0:05:36.224-0:05:36.490	IT1	0.140436	8	0.52611
Trial 1	M1-2	C-P	M	0:05:36.490-0:05:36.756	IT1	0.0455155	8	0.170512
Trial 1	M1-2	C-P	M	0:05:36.756-0:05:37.022	IT1	0.0415786	8	0.155763
Trial 1	M1-2	C-P	M	0:05:37.022-0:05:37.288	IT1	0.0186446	8	0.069848
Trial 1	M1-2	C-P	M	0:05:37.288-0:05:37.554	IT1	0.0727806	8	0.272654
Trial 1	M1-2	C-P	M	0:05:37.554-0:05:37.820	IT1	0.147252	8	0.551641
Trial 1	M1-2	C-P	M	0:05:37.820-0:05:38.086	IT1	0.0474535	8	0.177772
Trial 1	M1-2	C-P	M	0:05:38.086-0:05:38.352	IT1	0.126631	8	0.474397
Trial 1	M1-2	C-P	M	0:05:38.352-0:05:38.618	IT1	0.0981186	8	0.367579
Trial 1	M1-2	C-P	M	0:05:38.618-0:05:38.884	IT1	0.149283	8	0.55925
Trial 1	M1-2	C-P	M	0:05:38.884-0:05:39.150	IT1	0.0543214	8	0.2035
Trial 1	M1-2	C-P	M	0:05:39.150-0:05:39.416	IT1	0.485162	8	1.81753
Trial 1	M1-2	C-P	M	0:05:39.416-0:05:39.682	IT1	1.15379	8	4.32236
Trial 1	M1-2	C-P	M	0:05:39.682-0:05:39.948	IT1	0.747425	8	2.80005
Trial 1	M1-2	C-P	M	0:05:39.948-0:05:40.214	IT1	0.390048	8	1.46121
Trial 1	M1-2	C-P	M	0:05:40.214-0:05:40.480	IT1	0.304261	8	1.13984
Trial 1	M1-2	C-P	M	0:05:40.480-0:05:40.746	IT1	0.154825	8	0.580009
Trial 1	M1-2	C-P	M	0:05:40.746-0:05:41.012	IT1	0.0389414	8	0.145885
Trial 1	M1-2	C-P	M	0:05:41.012-0:05:41.278	IT1	0.0627989	8	0.235261
Trial 1	M1-2	C-P	M	0:05:41.278-0:05:41.544	IT1	0.0518746	8	0.194334
Trial 1	M1-2	C-P	M	0:05:41.544-0:05:41.810	IT1	0.121324	8	0.454513
Trial 1	M1-2	C-P	M	0:05:41.810-0:05:42.076	IT1	0.240316	8	0.900281
Trial 1	M1-2	C-P	M	0:05:42.076-0:05:42.342	IT1	0.152205	7	0.651654
Trial 1	M1-2	C-P	M	0:05:42.342-0:05:42.608	IT1	0.218645	8	0.819096
Trial 1	M1-2	C-P	M	0:05:42.608-0:05:42.874	IT1	0.0423807	8	0.158768
Trial 1	M1-2	C-P	M	0:05:42.874-0:05:43.140	IT1	0.036789	8	0.13782
Trial 1	M1-2	C-P	M	0:05:43.140-0:05:43.406	IT1	0.202344	8	0.758031
Trial 1	M1-2	C-P	M	0:05:43.406-0:05:43.672	IT1	0.651116	8	2.43924
Trial 1	M1-2	C-P	M	0:05:43.672-0:05:43.938	IT1	0.344072	8	1.28899
Trial 1	M1-2	C-P	M	0:05:43.938-0:05:44.204	IT1	0.387502	8	1.45168
Trial 1	M1-2	C-P	M	0:05:44.204-0:05:44.470	IT1	0.34593	8	1.29593
Trial 1	M1-2	C-P	M	0:05:44.470-0:05:44.736	IT1	0.304694	8	1.14145
Trial 1	M1-2	C-P	M	0:05:44.736-0:05:45.002	IT1	0.259607	8	0.972552
Trial 1	M1-2	C-P	M	0:05:45.002-0:05:45.268	IT1	0.394459	8	1.47774
Trial 1	M1-2	C-P	M	0:05:45.268-0:05:45.534	IT1	0.264775	8	0.991909
Trial 1	M1-2	C-P	M	0:05:45.534-0:05:45.800	IT1	0.114898	8	0.430434
Trial 1	M1-2	C-P	M	0:05:45.800-0:05:46.066	IT1	0.245694	8	0.920435
Trial 1	M1-2	C-P	M	0:05:46.066-0:05:46.332	IT1	0.220917	8	0.827609
Trial 1	M1-2	C-P	M	0:05:46.332-0:05:46.598	IT1	0.118929	8	0.445542
Trial 1	M1-2	C-P	M	0:05:46.598-0:05:46.864	IT1	0.13518	8	0.506416
Trial 1	M1-2	C-P	M	0:05:46.864-0:05:47.130	IT1	0.0595258	8	0.222997
Trial 1	M1-2	C-P	M	0:05:47.130-0:05:47.396	IT1	0.0422451	8	0.158263
Trial 1	M1-2	C-P	M	0:05:47.396-0:05:47.662	IT1	0.0486759	8	0.182351
Trial 1	M1-2	C-P	M	0:05:47.662-0:05:47.928	IT1	0.439837	8	1.64774
Trial 1	M1-2	C-P	M	0:05:47.928-0:05:48.194	IT1	0.208761	8	0.782069
Trial 1	M1-2	C-P	M	0:05:48.194-0:05:48.460	IT1	0.212674	8	0.796728
Trial 1	M1-2	C-P	M	0:05:48.460-0:05:48.726	IT1	0.0723112	8	0.270896
Trial 1	M1-2	C-P	M	0:05:48.726-0:05:48.992	IT1	0.0898252	8	0.336508
Trial 1	M1-2	C-P	M	0:05:48.992-0:05:49.258	IT1	0.0775942	8	0.290687
Trial 1	M1-2	C-P	M	0:05:49.258-0:05:49.524	IT1	0.0397646	8	0.148968
Trial 1	M1-2	C-P	M	0:05:49.524-0:05:49.790	IT1	0.265314	8	0.993929
Trial 1	M1-2	C-P	M	0:05:49.790-0:05:50.056	IT1	0.314475	8	1.1781
Trial 1	M1-2	C-P	M	0:05:50.056-0:05:50.322	IT1	0.130501	8	0.488889
Trial 1	M1-2	C-P	M	0:05:50.322-0:05:50.588	IT1	0.21998	8	0.824093
Trial 1	M1-2	C-P	M	0:05:50.588-0:05:50.854	IT1	0.0829988	8	0.310933
Trial 1	M1-2	C-P	M	0:05:50.854-0:05:51.120	IT1	0.0647937	8	0.242732
Trial 1	M1-2	C-P	M	0:05:51.120-0:05:51.386	IT1	0.0366751	8	0.137394
Trial 1	M1-2	C-P	M	0:05:51.386-0:05:51.652	IT1	0.0315235	8	0.118095
Trial 1	M1-2	C-P	M	0:05:51.652-0:05:51.918	IT1	0.0822399	7	0.352102
Trial 1	M1-2	C-P	M	0:05:51.918-0:05:52.184	IT1	0.0880944	8	0.330022
Trial 1	M1-2	C-P	M	0:05:52.184-0:05:52.450	IT1	0.16213	8	0.607378
Trial 1	M1-2	C-P	M	0:05:52.450-0:05:52.716	IT1	0.0470962	8	0.176434
Trial 1	M1-2	C-P	M	0:05:52.716-0:05:52.982	IT1	0.0478022	8	0.179077
Trial 1	M1-2	C-P	M	0:05:52.982-0:05:53.248	IT1	0.55066	8	2.0629
Trial 1	M1-2	C-P	M	0:05:53.248-0:05:53.514	IT1	0.508644	8	1.90552
Trial 1	M1-2	C-P	M	0:05:53.514-0:05:53.780	IT1	0.366687	8	1.3737
Trial 1	M1-2	C-P	M	0:05:53.780-0:05:54.046	IT1	0.533208	8	1.99753
Trial 1	M1-2	C-P	M	0:05:54.046-0:05:54.312	IT1	0.345214	8	1.29326
Trial 1	M1-2	C-P	M	0:05:54.312-0:05:54.578	IT1	0.539439	8	2.02087
Trial 1	M1-2	C-P	M	0:05:54.578-0:05:54.844	IT1	0.33681	8	1.26178
Trial 1	M1-2	C-P	M	0:05:54.844-0:05:55.110	IT1	0.16679	8	0.624834
Trial 1	M1-2	C-P	M	0:05:55.110-0:05:55.376	IT1	0.249764	8	0.935674
Trial 1	M1-2	C-P	M	0:05:55.376-0:05:55.642	IT1	0.114144	8	0.427609
Trial 1	M1-2	C-P	M	0:05:55.642-0:05:55.908	IT1	0.0894621	8	0.335146
Trial 1	M1-2	C-P	M	0:05:55.908-0:05:56.174	IT1	0.130129	8	0.487498
Trial 1	M1-2	C-P	M	0:05:56.174-0:05:56.440	IT1	0.0474898	8	0.177909
Trial 1	M1-2	C-P	M	0:05:56.440-0:05:56.706	IT1	0.0452812	8	0.169634
Trial 1	M1-2	C-P	M	0:05:56.706-0:05:56.972	IT1	0.0692829	8	0.25955
Trial 1	M1-2	C-P	M	0:05:56.972-0:05:57.238	IT1	0.0763122	8	0.285884
Trial 1	M1-2	C-P	M	0:05:57.238-0:05:57.504	IT1	0.276215	8	1.03478
Trial 1	M1-2	C-P	M	0:05:57.504-0:05:57.770	IT1	0.491053	8	1.8396
Trial 1	M1-2	C-P	M	0:05:57.770-0:05:58.036	IT1	0.420757	8	1.57625
Trial 1	M1-2	C-P	M	0:05:58.036-0:05:58.302	IT1	0.296819	8	1.11196
Trial 1	M1-2	C-P	M	0:05:58.302-0:05:58.568	IT1	0.248995	8	0.932794
Trial 1	M1-2	C-P	M	0:05:58.568-0:05:58.834	IT1	0.0959022	8	0.359275
Trial 1	M1-2	C-P	M	0:05:58.834-0:05:59.100	IT1	0.0297569	8	0.111478
Trial 1	M1-2	C-P	M	0:05:59.100-0:05:59.366	IT1	0.111054	8	0.416041
Trial 1	M1-2	C-P	M	0:05:59.366-0:05:59.632	IT1	0.0478171	8	0.179134
Trial 1	M1-2	C-P	M	0:05:59.632-0:05:59.898	IT1	0.0925395	8	0.346673
Trial 1	M1-2	C-P	M	0:05:59.898-0:06:00.164	IT1	0.109699	8	0.41096
Trial 1	M1-2	C-P	M	0:06:00.164-0:06:00.430	IT1	0.208827	8	0.782316
Trial 1	M1-2	C-P	M	0:06:00.430-0:06:00.696	IT1	0.0356365	8	0.133503
Trial 1	M1-2	C-P	M	0:06:00.696-0:06:00.962	IT1	0.0433853	8	0.162531
Trial 1	M1-2	C-P	M	0:06:00.962-0:06:01.228	IT1	0.139262	8	0.521716
Trial 1	M1-2	C-P	M	0:06:01.228-0:06:01.494	IT1	0.0928635	7	0.397594
Trial 1	M1-2	C-P	M	0:06:01.494-0:06:01.760	IT1	0.0735569	8	0.275562
Trial 1	M1-2	C-P	M	0:06:01.760-0:06:02.026	IT1	0.386863	8	1.44928
Trial 1	M1-2	C-P	M	0:06:02.026-0:06:02.292	IT1	0.388507	8	1.45544
Trial 1	M1-2	C-P	M	0:06:02.292-0:06:02.558	IT1	0.272204	8	1.01974
Trial 1	M1-2	C-P	M	0:06:02.558-0:06:02.824	IT1	0.411606	8	1.54198
Trial 1	M1-2	C-P	M	0:06:02.824-0:06:03.090	IT1	0.452636	8	1.69568
Trial 1	M1-2	C-P	M	0:06:03.090-0:06:03.356	IT1	0.285885	8	1.07099
Trial 1	M1-2	C-P	M	0:06:03.356-0:06:03.622	IT1	0.502893	8	1.88396
Trial 1	M1-2	C-P	M	0:06:03.622-0:06:03.888	IT1	0.199027	8	0.745602
Trial 1	M1-2	C-P	M	0:06:03.888-0:06:04.154	IT1	0.343587	8	1.28716
Trial 1	M1-2	C-P	M	0:06:04.154-0:06:04.420	IT1	0.317709	8	1.19022
Trial 1	M1-2	C-P	M	0:06:04.420-0:06:04.686	IT1	0.376735	8	1.41134
Trial 1	M1-2	C-P	M	0:06:04.686-0:06:04.952	IT1	0.130748	8	0.489816
Trial 1	M1-2	C-P	M	0:06:04.952-0:06:05.218	IT1	0.0630361	8	0.23615
Trial 1	M1-2	C-P	M	0:06:05.218-0:06:05.484	IT1	0.0416433	8	0.156005
Trial 1	M1-2	C-P	M	0:06:05.484-0:06:05.750	IT1	0.0295376	8	0.110656
Trial 1	M1-2	C-P	M	0:06:05.750-0:06:06.016	IT1	0.046516	8	0.17426
Trial 1	M1-2	C-P	M	0:06:06.016-0:06:06.282	IT1	0.0152885	8	0.0572749
Trial 1	M1-2	C-P	M	0:06:06.282-0:06:06.548	IT1	0.0605583	8	0.226867
Trial 1	M1-2	C-P	M	0:06:06.548-0:06:06.814	IT1	0.0150581	8	0.0564116
Trial 1	M1-2	C-P	M	0:06:06.814-0:06:07.080	IT1	0.116595	8	0.436798
Trial 1	M1-2	C-P	M	0:06:07.080-0:06:07.346	IT1	0.0413438	8	0.154884
Trial 1	M1-2	C-P	M	0:06:07.346-0:06:07.612	IT1	0.123582	8	0.46297
Trial 1	M1-2	C-P	M	0:06:07.612-0:06:07.878	IT1	0.0545944	8	0.204523
Trial 1	M1-2	C-P	M	0:06:07.878-0:06:08.144	IT1	0.19057	8	0.713932
Trial 1	M1-2	C-P	M	0:06:08.144-0:06:08.410	IT1	0.0723363	8	0.270992
Trial 1	M1-2	C-P	M	0:06:08.410-0:06:08.676	IT1	0.208296	8	0.780339
Trial 1	M1-2	C-P	M	0:06:08.676-0:06:08.942	IT1	0.145669	8	0.545712
Trial 1	M1-2	C-P	M	0:06:08.942-0:06:09.208	IT1	0.0759842	8	0.284654
Trial 1	M1-2	C-P	M	0:06:09.208-0:06:09.474	IT1	0.433852	8	1.62532
Trial 1	M1-2	C-P	M	0:06:09.474-0:06:09.740	IT1	0.259934	8	0.973789
Trial 1	M1-2	C-P	M	0:06:09.740-0:06:10.006	IT1	0.440613	8	1.65064
Trial 1	M1-2	C-P	M	0:06:10.006-0:06:10.272	IT1	0.242266	8	0.907593
Trial 1	M1-2	C-P	M	0:06:10.272-0:06:10.538	IT1	0.311519	8	1.16702
Trial 1	M1-2	C-P	M	0:06:10.538-0:06:10.804	IT1	0.156216	7	0.668827
Trial 1	M1-2	C-P	M	0:06:10.804-0:06:11.070	IT1	0.0721022	8	0.270112
Trial 1	M1-2	C-P	M	0:06:11.070-0:06:11.336	IT1	0.0554839	8	0.20786
Trial 1	M1-2	C-P	M	0:06:11.336-0:06:11.602	IT1	0.0553619	8	0.207401
Trial 1	M1-2	C-P	M	0:06:11.602-0:06:11.868	IT1	0.0348	8	0.130369
Trial 1	M1-2	C-P	M	0:06:11.868-0:06:12.134	IT1	0.0253319	8	0.0948998
Trial 1	M1-2	C-P	M	0:06:12.134-0:06:12.400	IT1	0.0198776	8	0.0744657
Trial 1	M1-2	C-P	M	0:06:12.400-0:06:12.666	IT1	0.235912	8	0.883781
Trial 1	M1-2	C-P	M	0:06:12.666-0:06:12.932	IT1	0.300914	8	1.1273
Trial 1	M1-2	C-P	M	0:06:12.932-0:06:13.198	IT1	0.235072	8	0.880638
Trial 1	M1-2	C-P	M	0:06:13.198-0:06:13.464	IT1	0.432813	8	1.62142
Trial 1	M1-2	C-P	M	0:06:13.464-0:06:13.730	IT1	0.244427	8	0.915684
Trial 1	M1-2	C-P	M	0:06:13.730-0:06:13.996	IT1	0.156541	8	0.586442
Trial 1	M1-2	C-P	M	0:06:13.996-0:06:14.262	IT1	0.0902435	8	0.338074
Trial 1	M1-2	C-P	M	0:06:14.262-0:06:14.528	IT1	0.0851853	8	0.319127
Trial 1	M1-2	C-P	M	0:06:14.528-0:06:14.794	IT1	0.096157	8	0.360225
Trial 1	M1-2	C-P	M	0:06:14.794-0:06:15.060	IT1	0.0610018	8	0.228528
Trial 1	M1-2	C-P	M	0:06:15.060-0:06:15.326	IT1	0.0963707	8	0.361026
Trial 1	M1-2	C-P	M	0:06:15.326-0:06:15.592	IT1	0.200758	8	0.752085
Trial 1	M1-2	C-P	M	0:06:15.592-0:06:15.858	IT1	0.202912	8	0.760161
Trial 1	M1-2	C-P	M	0:06:15.858-0:06:16.124	IT1	0.339984	8	1.27366
Trial 1	M1-2	C-P	M	0:06:16.124-0:06:16.390	IT1	0.267192	8	1.00096
Trial 1	M1-2	C-P	M	0:06:16.390-0:06:16.656	IT1	0.0966926	8	0.362235
Trial 1	M1-2	C-P	M	0:06:16.656-0:06:16.922	IT1	0.0720428	8	0.269891
Trial 1	M1-2	C-P	M	0:06:16.922-0:06:17.188	IT1	0.034744	8	0.130161
Trial 1	M1-2	C-P	M	0:06:17.188-0:06:17.454	IT1	0.0623702	8	0.233653
Trial 1	M1-2	C-P	M	0:06:17.454-0:06:17.720	IT1	0.0380059	8	0.142379
Trial 1	M1-2	C-P	M	0:06:17.720-0:06:17.986	IT1	0.114199	8	0.42782
Trial 1	M1-2	C-P	M	0:06:17.986-0:06:18.252	IT1	0.0707944	8	0.265213
Trial 1	M1-2	C-P	M	0:06:18.252-0:06:18.518	IT1	0.0890261	8	0.333514
Trial 1	M1-2	C-P	M	0:06:18.518-0:06:18.784	IT1	0.0249217	8	0.0933623
Trial 1	M1-2	C-P	M	0:06:18.784-0:06:19.050	IT1	0.0436213	8	0.163415
Trial 1	M1-2	C-P	M	0:06:19.050-0:06:19.316	IT1	0.114834	8	0.430202
Trial 1	M1-2	C-P	M	0:06:19.316-0:06:19.582	IT1	0.0437648	8	0.163953
Trial 1	M1-2	C-P	M	0:06:19.582-0:06:19.848	IT1	0.0822356	8	0.308075
Trial 1	M1-2	C-P	M	0:06:19.848-0:06:20.114	IT1	0.189125	8	0.70851
Trial 1	M1-2	C-P	M	0:06:20.114-0:06:20.380	IT1	0.366747	7	1.5702
Trial 1	M1-2	C-P	M	0:06:20.380-0:06:20.646	IT1	0.430994	8	1.61463
Trial 1	M1-2	C-P	M	0:06:20.646-0:06:20.912	IT1	0.189797	8	0.711027
Trial 1	M1-2	C-P	M	0:06:20.912-0:06:21.178	IT1	0.260959	8	0.977621
Trial 1	M1-2	C-P	M	0:06:21.178-0:06:21.444	IT1	0.225282	8	0.843957
Trial 1	M1-2	C-P	M	0:06:21.444-0:06:21.710	IT1	0.0496031	8	0.185825
Trial 1	M1-2	C-P	M	0:06:21.710-0:06:21.976	IT1	0.043815	8	0.164143
Trial 1	M1-2	C-P	M	0:06:21.976-0:06:22.242	IT1	0.144836	8	0.542588
Trial 1	M1-2	C-P	M	0:06:22.242-0:06:22.508	IT1	0.0563675	8	0.211167
Trial 1	M1-2	C-P	M	0:06:22.508-0:06:22.774	IT1	0.1394	8	0.522225
Trial 1	M1-2	C-P	M	0:06:22.774-0:06:23.040	IT1	0.0957011	8	0.358522
Trial 1	M1-2	C-P	M	0:06:23.040-0:06:23.306	IT1	0.145085	8	0.543524
Trial 1	M1-2	C-P	M	0:06:23.306-0:06:23.572	IT1	0.203447	8	0.762158
Trial 1	M1-2	C-P	M	0:06:23.572-0:06:23.838	IT1	0.32378	8	1.21296
Trial 1	M1-2	C-P	M	0:06:23.838-0:06:24.104	IT1	0.0788365	8	0.295343
Trial 1	M1-2	C-P	M	0:06:24.104-0:06:24.370	IT1	0.103667	8	0.388358
Trial 1	M1-2	C-P	M	0:06:24.370-0:06:24.636	IT1	0.146792	8	0.549915
Trial 1	M1-2	C-P	M	0:06:24.636-0:06:24.902	IT1	0.0959766	8	0.35955
Trial 1	M1-2	C-P	M	0:06:24.902-0:06:25.168	IT1	0.328301	8	1.22989
Trial 1	M1-2	C-P	M	0:06:25.168-0:06:25.434	IT1	0.215974	8	0.809095
Trial 1	M1-2	C-P	M	0:06:25.434-0:06:25.700	IT1	0.155128	8	0.581149
Trial 1	M1-2	C-P	M	0:06:25.700-0:06:25.966	IT1	0.125581	8	0.470463
Trial 1	M1-2	C-P	M	0:06:25.966-0:06:26.232	IT1	0.0378162	8	0.14167
Trial 1	M1-2	C-P	M	0:06:26.232-0:06:26.498	IT1	0.0336933	8	0.126223
Trial 1	M1-2	C-P	M	0:06:26.498-0:06:26.764	IT1	0.0172201	8	0.0645109
Trial 1	M1-2	C-P	M	0:06:26.764-0:06:27.030	IT1	0.156119	8	0.584857
Trial 1	M1-2	C-P	M	0:06:27.030-0:06:27.296	IT1	0.313685	8	1.17514
Trial 1	M1-2	C-P	M	0:06:27.296-0:06:27.562	IT1	0.412915	8	1.54687
Trial 1	M1-2	C-P	M	0:06:27.562-0:06:27.828	IT1	0.35132	8	1.31614
Trial 1	M1-2	C-P	M	0:06:27.828-0:06:28.094	IT1	0.231107	8	0.865783
Trial 1	M1-2	C-P	M	0:06:28.094-0:06:28.360	IT1	0.0820281	8	0.307297
Trial 1	M1-2	C-P	M	0:06:28.360-0:06:28.626	IT1	0.0594914	8	0.222869
Trial 1	M1-2	C-P	M	0:06:28.626-0:06:28.892	IT1	0.0449822	8	0.168514
Trial 1	M1-2	C-P	M	0:06:28.892-0:06:29.158	IT1	0.0211611	8	0.079274
Trial 1	M1-2	C-P	M	0:06:29.158-0:06:29.424	IT1	0.115749	8	0.433631
Trial 1	M1-2	C-P	M	0:06:29.424-0:06:29.690	IT1	0.024106	8	0.0903075
Trial 1	M1-2	C-P	M	0:06:29.690-0:06:29.956	IT1	0.0790373	7	0.33839
Trial 1	M1-2	C-P	M	0:06:29.956-0:06:30.222	IT1	0.0545825	8	0.204479
Trial 1	M1-2	C-P	M	0:06:30.222-0:06:30.488	IT1	0.100766	8	0.377495
Trial 1	M1-2	C-P	M	0:06:30.488-0:06:30.754	IT1	0.0360696	8	0.135125
Trial 1	M1-2	C-P	M	0:06:30.754-0:06:31.020	IT1	0.104403	8	0.391121
Trial 1	M1-2	C-P	M	0:06:31.020-0:06:31.286	IT1	0.0383791	8	0.143776
Trial 1	M1-2	C-P	M	0:06:31.286-0:06:31.552	IT1	0.094853	8	0.355349
Trial 1	M1-2	C-P	M	0:06:31.552-0:06:31.818	IT1	0.0616107	8	0.230807
Trial 1	M1-2	C-P	M	0:06:31.818-0:06:32.084	IT1	0.0519955	8	0.194787
Trial 1	M1-2	C-P	M	0:06:32.084-0:06:32.350	IT1	0.29004	8	1.08657
Trial 1	M1-2	C-P	M	0:06:32.350-0:06:32.616	IT1	0.0379473	8	0.142162
Trial 1	M1-2	C-P	M	0:06:32.616-0:06:32.882	IT1	0.0378396	8	0.141756
Trial 1	M1-2	C-P	M	0:06:32.882-0:06:33.148	IT1	0.0600531	8	0.224974
Trial 1	M1-2	C-P	M	0:06:33.148-0:06:33.414	IT1	0.053638	8	0.20094
Trial 1	M1-2	C-P	M	0:06:33.414-0:06:33.680	IT1	0.284204	8	1.0647
Trial 1	M1-2	C-P	M	0:06:33.680-0:06:33.946	IT1	0.197444	8	0.739674
Trial 1	M1-2	C-P	M	0:06:33.946-0:06:34.212	IT1	0.461608	8	1.72931
Trial 1	M1-2	C-P	M	0:06:34.212-0:06:34.478	IT1	0.340636	8	1.27611
Trial 1	M1-2	C-P	M	0:06:34.478-0:06:34.744	IT1	0.171116	8	0.641047
Trial 1	M1-2	C-P	M	0:06:34.744-0:06:35.010	IT1	0.147467	8	0.552455
Trial 1	M1-2	C-P	M	0:06:35.010-0:06:35.276	IT1	0.0916861	8	0.343486
Trial 1	M1-2	C-P	M	0:06:35.276-0:06:35.542	IT1	0.0351974	8	0.131858
Trial 1	M1-2	C-P	M	0:06:35.542-0:06:35.808	IT1	0.120655	8	0.452003
Trial 1	M1-2	C-P	M	0:06:35.808-0:06:36.074	IT1	0.0858595	8	0.321652
Trial 1	M1-2	C-P	M	0:06:36.074-0:06:36.340	IT1	0.10655	8	0.399169
Trial 1	M1-2	C-P	M	0:06:36.340-0:06:36.606	IT1	0.226524	8	0.848609
Trial 1	M1-2	C-P	M	0:06:36.606-0:06:36.872	IT1	0.0342948	8	0.128478
Trial 1	M1-2	C-P	M	0:06:36.872-0:06:37.138	IT1	0.109803	8	0.411346
Trial 1	M1-2	C-P	M	0:06:37.138-0:06:37.404	IT1	0.0105026	8	0.0393449
Trial 1	M1-2	C-P	M	0:06:37.404-0:06:37.670	IT1	0.0952771	8	0.356929
Trial 1	M1-2	C-P	M	0:06:37.670-0:06:37.936	IT1	0.113179	8	0.423993
Trial 1	M1-2	C-P	M	0:06:37.936-0:06:38.202	IT1	0.302932	8	1.13486
Trial 1	M1-2	C-P	M	0:06:38.202-0:06:38.468	IT1	0.0225042	8	0.0843056
Trial 1	M1-2	C-P	M	0:06:38.468-0:06:38.734	IT1	0.137397	8	0.514732
Trial 1	M1-2	C-P	M	0:06:38.734-0:06:39.000	IT1	0.0745308	8	0.279209
Trial 1	M1-2	C-P	M	0:06:39.000-0:06:39.266	IT1	0.0255561	8	0.095739
Trial 1	M1-2	C-P	M	0:06:39.266-0:06:39.532	IT1	0.244336	7	1.04611
Trial 1	M1-2	C-P	M	0:06:39.532-0:06:39.798	IT1	0.234557	8	0.878728
Trial 1	M1-2	C-P	M	0:06:39.798-0:06:40.064	IT1	0.158101	8	0.59228
Trial 1	M1-2	C-P	M	0:06:40.064-0:06:40.330	IT1	0.0986954	8	0.369738
Trial 1	M1-2	C-P	M	0:06:40.330-0:06:40.596	IT1	0.173135	8	0.648613
Trial 1	M1-2	C-P	M	0:06:40.596-0:06:40.862	IT1	0.115521	8	0.432765
Trial 1	M1-2	C-P	M	0:06:40.862-0:06:41.128	IT1	0.0617338	8	0.231271
Trial 1	M1-2	C-P	M	0:06:41.128-0:06:41.394	IT1	0.164888	8	0.617718
Trial 1	M1-2	C-P	M	0:06:41.394-0:06:41.660	IT1	0.0128638	8	0.0481908
Trial 1	M1-2	C-P	M	0:06:41.660-0:06:41.926	IT1	0.102513	8	0.384039
Trial 1	M1-2	C-P	M	0:06:41.926-0:06:42.192	IT1	0.0179514	8	0.0672517
Trial 1	M1-2	C-P	M	0:06:42.192-0:06:42.458	IT1	0.0970584	8	0.363602
Trial 1	M1-2	C-P	M	0:06:42.458-0:06:42.724	IT1	0.0459528	8	0.172151
Trial 1	M1-2	C-P	M	0:06:42.724-0:06:42.990	IT1	0.0265398	8	0.0994237
Trial 1	M1-2	C-P	M	0:06:42.990-0:06:43.256	IT1	0.062346	8	0.233562
Trial 1	M1-2	C-P	M	0:06:43.256-0:06:43.522	IT1	0.017163	8	0.0642974
Trial 1	M1-2	C-P	M	0:06:43.522-0:06:43.788	IT1	0.0480698	8	0.180082
Trial 1	M1-2	C-P	M	0:06:43.788-0:06:44.054	IT1	0.0356802	8	0.133667
Trial 1	M1-2	C-P	M	0:06:44.054-0:06:44.320	IT1	0.0841542	8	0.315265
Trial 1	M1-2	C-P	M	0:06:44.320-0:06:44.586	IT1	0.0225418	8	0.0844466
Trial 1	M1-2	C-P	M	0:06:44.586-0:06:44.852	IT1	0.073727	8	0.276198
Trial 1	M1-2	C-P	M	0:06:44.852-0:06:45.118	IT1	0.0875914	8	0.328137
Trial 1	M1-2	C-P	M	0:06:45.118-0:06:45.384	IT1	0.250296	8	0.937673
Trial 1	M1-2	C-P	M	0:06:45.384-0:06:45.650	IT1	0.22263	8	0.834028
Trial 1	M1-2	C-P	M	0:06:45.650-0:06:45.916	IT1	0.188979	8	0.707965
Trial 1	M1-2	C-P	M	0:06:45.916-0:06:46.182	IT1	0.238459	8	0.893318
Trial 1	M1-2	C-P	M	0:06:46.182-0:06:46.448	IT1	0.0649546	8	0.243336
Trial 1	M1-2	C-P	M	0:06:46.448-0:06:46.714	IT1	0.184911	8	0.692731
Trial 1	M1-2	C-P	M	0:06:46.714-0:06:46.980	IT1	0.164214	8	0.615198
Trial 1	M1-2	C-P	M	0:06:46.980-0:06:47.246	IT1	0.110265	8	0.413078
Trial 1	M1-2	C-P	M	0:06:47.246-0:06:47.512	IT1	0.0148106	8	0.055484
Trial 1	M1-2	C-P	M	0:06:47.512-0:06:47.778	IT1	0.0701246	8	0.262703
Trial 1	M1-2	C-P	M	0:06:47.778-0:06:48.044	IT1	0.0574036	8	0.215047
Trial 1	M1-2	C-P	M	0:06:48.044-0:06:48.310	IT1	0.10893	8	0.40808
Trial 1	M1-2	C-P	M	0:06:48.310-0:06:48.576	IT1	0.136615	8	0.511792
Trial 1	M1-2	C-P	M	0:06:48.576-0:06:48.842	IT1	0.307698	7	1.31738
Trial 1	M1-2	C-P	M	0:06:48.842-0:06:49.108	IT1	0.656068	8	2.45779
Trial 1	M1-2	C-P	M	0:06:49.108-0:06:49.374	IT1	0.506019	8	1.89569
Trial 1	M1-2	C-P	M	0:06:49.374-0:06:49.640	IT1	0.322399	8	1.20779
Trial 1	M1-2	C-P	M	0:06:49.640-0:06:49.906	IT1	0.40413	8	1.51398
Trial 1	M1-2	C-P	M	0:06:49.906-0:06:50.172	CS2a	0.313225	8	1.17341
Trial 1	M1-2	C-P	M	0:06:50.172-0:06:50.438	CS2a	0.229825	8	0.860992
Trial 1	M1-2	C-P	M	0:06:50.438-0:06:50.704	CS2a	0.224388	8	0.840613
Trial 1	M1-2	C-P	M	0:06:50.704-0:06:50.970	CS2a	0.197396	8	0.739493
Trial 1	M1-2	C-P	M	0:06:50.970-0:06:51.236	CS2a	0.132081	8	0.494813
Trial 1	M1-2	C-P	M	0:06:51.236-0:06:51.502	CS2a	0.154085	8	0.577241
Trial 1	M1-2	C-P	M	0:06:51.502-0:06:51.768	CS2a	0.214182	8	0.802379
Trial 1	M1-2	C-P	M	0:06:51.768-0:06:52.034	CS2a	0.326828	8	1.22438
Trial 1	M1-2	C-P	M	0:06:52.034-0:06:52.300	CS2a	0.541153	8	2.02729
Trial 1	M1-2	C-P	M	0:06:52.300-0:06:52.566	CS2a	0.307813	8	1.15315
Trial 1	M1-2	C-P	M	0:06:52.566-0:06:52.832	CS2a	0.456717	8	1.71097
Trial 1	M1-2	C-P	M	0:06:52.832-0:06:53.098	CS2a	0.262342	8	0.982803
Trial 1	M1-2	C-P	M	0:06:53.098-0:06:53.364	CS2a	0.437703	8	1.63975
Trial 1	M1-2	C-P	M	0:06:53.364-0:06:53.630	CS2a	0.433668	8	1.62462
Trial 1	M1-2	C-P	M	0:06:53.630-0:06:53.896	CS2a	0.420696	8	1.57604
Trial 1	M1-2	C-P	M	0:06:53.896-0:06:54.162	CS2a	0.339841	8	1.27313
Trial 1	M1-2	C-P	M	0:06:54.162-0:06:54.428	CS2a	0.159899	8	0.599023
Trial 1	M1-2	C-P	M	0:06:54.428-0:06:54.694	CS2a	0.234143	8	0.877161
Trial 1	M1-2	C-P	M	0:06:54.694-0:06:54.960	CS2a	0.140236	8	0.525359
Trial 1	M1-2	C-P	M	0:06:54.960-0:06:55.226	CS2a	0.0496283	8	0.185919
Trial 1	M1-2	C-P	M	0:06:55.226-0:06:55.492	CS2a	0.0678144	8	0.254048
Trial 1	M1-2	C-P	M	0:06:55.492-0:06:55.758	CS2a	0.0709595	8	0.265831
Trial 1	M1-2	C-P	M	0:06:55.758-0:06:56.024	CS2a	0.0430131	8	0.161138
Trial 1	M1-2	C-P	M	0:06:56.024-0:06:56.290	CS2a	0.0972127	8	0.364182
Trial 1	M1-2	C-P	M	0:06:56.290-0:06:56.556	CS2a	0.026607	8	0.0996765
Trial 1	M1-2	C-P	M	0:06:56.556-0:06:56.822	CS2a	0.0416093	8	0.155878
Trial 1	M1-2	C-P	M	0:06:56.822-0:06:57.088	CS2a	0.0386973	8	0.144973
Trial 1	M1-2	C-P	M	0:06:57.088-0:06:57.354	CS2a	0.0327508	8	0.122691
Trial 1	M1-2	C-P	M	0:06:57.354-0:06:57.620	CS2a	0.255684	8	0.957858
Trial 1	M1-2	C-P	M	0:06:57.620-0:06:57.886	CS2a	0.21813	8	0.817171
Trial 1	M1-2	C-P	M	0:06:57.886-0:06:58.152	CS2a	0.292874	8	1.09718
Trial 1	M1-2	C-P	M	0:06:58.152-0:06:58.418	CS2a	0.280342	7	1.20026
Trial 1	M1-2	C-P	M	0:06:58.418-0:06:58.684	CS2a	0.269688	8	1.01032
Trial 1	M1-2	C-P	M	0:06:58.684-0:06:58.950	CS2a	0.13796	8	0.51683
Trial 1	M1-2	C-P	M	0:06:58.950-0:06:59.216	CS2a	0.0837406	8	0.313713
Trial 1	M1-2	C-P	M	0:06:59.216-0:06:59.482	CS2a	0.085049	8	0.318617
Trial 1	M1-2	C-P	M	0:06:59.482-0:06:59.748	CS2a	0.016804	8	0.0629518
Trial 1	M1-2	C-P	M	0:06:59.748-0:07:00.014	CS2a	0.0411243	8	0.154062
Trial 1	M1-2	C-P	M	0:07:00.014-0:07:00.280	CS2b	0.0635291	8	0.237999
Trial 1	M1-2	C-P	M	0:07:00.280-0:07:00.546	CS2b	0.654997	8	2.45379
Trial 1	M1-2	C-P	M	0:07:00.546-0:07:00.812	CS2b	0.169239	8	0.634012
Trial 1	M1-2	C-P	M	0:07:00.812-0:07:01.078	CS2b	0.145964	8	0.546817
Trial 1	M1-2	C-P	M	0:07:01.078-0:07:01.344	CS2b	0.104353	8	0.390932
Trial 1	M1-2	C-P	M	0:07:01.344-0:07:01.610	CS2b	0.237382	8	0.889292
Trial 1	M1-2	C-P	M	0:07:01.610-0:07:01.876	CS2b	0.403989	8	1.51344
Trial 1	M1-2	C-P	M	0:07:01.876-0:07:02.142	CS2b	0.218021	8	0.816758
Trial 1	M1-2	C-P	M	0:07:02.142-0:07:02.408	CS2b	0.0769816	8	0.288394
Trial 1	M1-2	C-P	M	0:07:02.408-0:07:02.674	CS2b	0.0893183	8	0.33461
Trial 1	M1-2	C-P	M	0:07:02.674-0:07:02.940	CS2b	0.0755421	8	0.282997
Trial 1	M1-2	C-P	M	0:07:02.940-0:07:03.206	CS2b	0.0852169	8	0.319244
Trial 1	M1-2	C-P	M	0:07:03.206-0:07:03.472	CS2b	0.068863	8	0.257978
Trial 1	M1-2	C-P	M	0:07:03.472-0:07:03.738	CS2b	0.0773931	8	0.289932
Trial 1	M1-2	C-P	M	0:07:03.738-0:07:04.004	CS2b	0.00329704	8	0.0123514
Trial 1	M1-2	C-P	M	0:07:04.004-0:07:04.270	CS2b	0.122913	8	0.460461
Trial 1	M1-2	C-P	M	0:07:04.270-0:07:04.536	CS2b	0.0406577	8	0.152313
Trial 1	M1-2	C-P	M	0:07:04.536-0:07:04.802	CS2b	0.0500868	8	0.187637
Trial 1	M1-2	C-P	M	0:07:04.802-0:07:05.068	CS2b	0.0583378	8	0.218547
Trial 1	M1-2	C-P	M	0:07:05.068-0:07:05.334	CS2b	0.0253931	8	0.0951304
Trial 1	M1-2	C-P	M	0:07:05.334-0:07:05.600	CS2b	0.0294719	8	0.11041
Trial 1	M1-2	C-P	M	0:07:05.600-0:07:05.866	CS2b	0.0359036	8	0.134503
Trial 1	M1-2	C-P	M	0:07:05.866-0:07:06.132	CS2b	0.0178204	8	0.0667596
Trial 1	M1-2	C-P	M	0:07:06.132-0:07:06.398	CS2b	0.0199093	8	0.0745852
Trial 1	M1-2	C-P	M	0:07:06.398-0:07:06.664	CS2b	0.0388852	8	0.145673
Trial 1	M1-2	C-P	M	0:07:06.664-0:07:06.930	CS2b	0.0482303	8	0.180682
Trial 1	M1-2	C-P	M	0:07:06.930-0:07:07.196	CS2b	0.139446	8	0.522397
Trial 1	M1-2	C-P	M	0:07:07.196-0:07:07.462	CS2b	0.0227486	8	0.0852222
Trial 1	M1-2	C-P	M	0:07:07.462-0:07:07.728	CS2b	0.0532535	8	0.199504
Trial 1	M1-2	C-P	M	0:07:07.728-0:07:07.994	CS2b	0.0262699	7	0.112473
Trial 1	M1-2	C-P	M	0:07:07.994-0:07:08.260	CS2b	0.0277828	8	0.104082
Trial 1	M1-2	C-P	M	0:07:08.260-0:07:08.526	CS2b	0.0486907	8	0.182406
Trial 1	M1-2	C-P	M	0:07:08.526-0:07:08.792	CS2b	0.0155077	8	0.0580953
Trial 1	M1-2	C-P	M	0:07:08.792-0:07:09.058	CS2b	0.0749328	8	0.280716
Trial 1	M1-2	C-P	M	0:07:09.058-0:07:09.324	CS2b	0.0306331	8	0.11476
Trial 1	M1-2	C-P	M	0:07:09.324-0:07:09.590	CS2b	0.0744096	8	0.278755
Trial 1	M1-2	C-P	M	0:07:09.590-0:07:09.856	CS2b	0.0227083	8	0.0850708
Trial 1	M1-2	C-P	M	0:07:09.856-0:07:10.122	IT2	0.0703782	8	0.263653
Trial 1	M1-2	C-P	M	0:07:10.122-0:07:10.388	IT2	16.3235	8	61.1521
Trial 1	M1-2	C-P	M	0:07:10.388-0:07:10.654	IT2	23.104	8	86.5535
Trial 1	M1-2	C-P	M	0:07:10.654-0:07:10.920	IT2	5.80244	8	21.7373
Trial 1	M1-2	C-P	M	0:07:10.920-0:07:11.186	IT2	6.71847	8	25.1689
Trial 1	M1-2	C-P	M	0:07:11.186-0:07:11.452	IT2	5.23413	8	19.6084
Trial 1	M1-2	C-P	M	0:07:11.452-0:07:11.718	IT2	0.481002	8	1.80196
Trial 1	M1-2	C-P	M	0:07:11.718-0:07:11.984	IT2	0.411439	8	1.54135
Trial 1	M1-2	C-P	M	0:07:11.984-0:07:12.250	IT2	0.391168	8	1.46542
Trial 1	M1-2	C-P	M	0:07:12.250-0:07:12.516	IT2	0.345561	8	1.29456
Trial 1	M1-2	C-P	M	0:07:12.516-0:07:12.782	IT2	0.342541	8	1.28325
Trial 1	M1-2	C-P	M	0:07:12.782-0:07:13.048	IT2	0.454497	8	1.70266
Trial 1	M1-2	C-P	M	0:07:13.048-0:07:13.314	IT2	0.160512	8	0.601315
Trial 1	M1-2	C-P	M	0:07:13.314-0:07:13.580	IT2	0.245837	8	0.920971
Trial 1	M1-2	C-P	M	0:07:13.580-0:07:13.846	IT2	0.250867	8	0.939804
Trial 1	M1-2	C-P	M	0:07:13.846-0:07:14.112	IT2	0.398186	8	1.4917
Trial 1	M1-2	C-P	M	0:07:14.112-0:07:14.378	IT2	0.392066	8	1.46878
Trial 1	M1-2	C-P	M	0:07:14.378-0:07:14.644	IT2	0.350424	8	1.31277
Trial 1	M1-2	C-P	M	0:07:14.644-0:07:14.910	IT2	0.423494	8	1.58651
Trial 1	M1-2	C-P	M	0:07:14.910-0:07:15.176	IT2	0.335573	8	1.25713
Trial 1	M1-2	C-P	M	0:07:15.176-0:07:15.442	IT2	0.398551	8	1.49307
Trial 1	M1-2	C-P	M	0:07:15.442-0:07:15.708	IT2	0.297734	8	1.11539
Trial 1	M1-2	C-P	M	0:07:15.708-0:07:15.974	IT2	0.366351	8	1.37244
Trial 1	M1-2	C-P	M	0:07:15.974-0:07:16.240	IT2	0.565196	8	2.11736
Trial 1	M1-2	C-P	M	0:07:16.240-0:07:16.506	IT2	0.694051	8	2.60009
Trial 1	M1-2	C-P	M	0:07:16.506-0:07:16.772	IT2	0.345056	8	1.29266
Trial 1	M1-2	C-P	M	0:07:16.772-0:07:17.038	IT2	0.240871	8	0.902369
Trial 1	M1-2	C-P	M	0:07:17.038-0:07:17.304	IT2	0.244561	8	0.916185
Trial 1	M1-2	C-P	M	0:07:17.304-0:07:17.570	IT2	0.309848	7	1.32659
Trial 1	M1-2	C-P	M	0:07:17.570-0:07:17.836	IT2	0.424883	8	1.59172
Trial 1	M1-2	C-P	M	0:07:17.836-0:07:18.102	IT2	0.215747	8	0.808247
Trial 1	M1-2	C-P	M	0:07:18.102-0:07:18.368	IT2	0.125356	8	0.469617
Trial 1	M1-2	C-P	M	0:07:18.368-0:07:18.634	IT2	0.170789	8	0.639816
Trial 1	M1-2	C-P	M	0:07:18.634-0:07:18.900	IT2	0.159654	8	0.598103
Trial 1	M1-2	C-P	M	0:07:18.900-0:07:19.166	IT2	0.150878	8	0.565226
Trial 1	M1-2	C-P	M	0:07:19.166-0:07:19.432	IT2	0.0620994	8	0.232639
Trial 1	M1-2	C-P	M	0:07:19.432-0:07:19.698	IT2	0.255132	8	0.955785
Trial 1	M1-2	C-P	M	0:07:19.698-0:07:19.964	IT2	0.246528	8	0.923554
Trial 1	M1-2	C-P	M	0:07:19.964-0:07:20.230	IT2	0.341157	8	1.27806
Trial 1	M1-2	C-P	M	0:07:20.230-0:07:20.496	IT2	0.352083	8	1.31899
Trial 1	M1-2	C-P	M	0:07:20.496-0:07:20.762	IT2	0.303768	8	1.13799
Trial 1	M1-2	C-P	M	0:07:20.762-0:07:21.028	IT2	0.169116	8	0.633553
Trial 1	M1-2	C-P	M	0:07:21.028-0:07:21.294	IT2	0.230226	8	0.862488
Trial 1	M1-2	C-P	M	0:07:21.294-0:07:21.560	IT2	0.262282	8	0.982573
Trial 1	M1-2	C-P	M	0:07:21.560-0:07:21.826	IT2	0.142437	8	0.533608
Trial 1	M1-2	C-P	M	0:07:21.826-0:07:22.092	IT2	0.0815278	8	0.305422
Trial 1	M1-2	C-P	M	0:07:22.092-0:07:22.358	IT2	0.111648	8	0.41826
Trial 1	M1-2	C-P	M	0:07:22.358-0:07:22.624	IT2	0.145684	8	0.54577
Trial 1	M1-2	C-P	M	0:07:22.624-0:07:22.890	IT2	0.127772	8	0.478663
Trial 1	M1-2	C-P	M	0:07:22.890-0:07:23.156	IT2	0.0820616	8	0.307425
Trial 1	M1-2	C-P	M	0:07:23.156-0:07:23.422	IT2	0.160688	8	0.601981
Trial 1	M1-2	C-P	M	0:07:23.422-0:07:23.688	IT2	0.0787134	8	0.294878
Trial 1	M1-2	C-P	M	0:07:23.688-0:07:23.954	IT2	0.101511	8	0.380285
Trial 1	M1-2	C-P	M	0:07:23.954-0:07:24.220	IT2	0.307037	8	1.15024
Trial 1	M1-2	C-P	M	0:07:24.220-0:07:24.486	IT2	0.354067	8	1.32642
Trial 1	M1-2	C-P	M	0:07:24.486-0:07:24.752	IT2	0.257189	8	0.963495
Trial 1	M1-2	C-P	M	0:07:24.752-0:07:25.018	IT2	0.813216	8	3.04652
Trial 1	M1-2	C-P	M	0:07:25.018-0:07:25.284	IT2	0.382741	8	1.43384
Trial 1	M1-2	C-P	M	0:07:25.284-0:07:25.550	IT2	0.711979	8	2.66724
Trial 1	M1-2	C-P	M	0:07:25.550-0:07:25.816	IT2	0.423412	8	1.58621
Trial 1	M1-2	C-P	M	0:07:25.816-0:07:26.082	IT2	0.374857	8	1.4043
Trial 1	M1-2	C-P	M	0:07:26.082-0:07:26.348	IT2	0.41425	8	1.55189
Trial 1	M1-2	C-P	M	0:07:26.348-0:07:26.614	IT2	0.102502	8	0.383996
Trial 1	M1-2	C-P	M	0:07:26.614-0:07:26.880	IT2	0.407627	7	1.74523
Trial 1	M1-2	C-P	M	0:07:26.880-0:07:27.146	IT2	0.337577	8	1.26465
Trial 1	M1-2	C-P	M	0:07:27.146-0:07:27.412	IT2	0.116598	8	0.436807
Trial 1	M1-2	C-P	M	0:07:27.412-0:07:27.678	IT2	0.234333	8	0.877867
Trial 1	M1-2	C-P	M	0:07:27.678-0:07:27.944	IT2	0.119336	8	0.447062
Trial 1	M1-2	C-P	M	0:07:27.944-0:07:28.210	IT2	0.269077	8	1.00803
Trial 1	M1-2	C-P	M	0:07:28.210-0:07:28.476	IT2	0.363325	8	1.3611
Trial 1	M1-2	C-P	M	0:07:28.476-0:07:28.742	IT2	0.391512	8	1.46669
Trial 1	M1-2	C-P	M	0:07:28.742-0:07:29.008	IT2	0.251817	8	0.943369
Trial 1	M1-2	C-P	M	0:07:29.008-0:07:29.274	IT2	0.867307	8	3.24917
Trial 1	M1-2	C-P	M	0:07:29.274-0:07:29.540	IT2	0.428118	8	1.60383
Trial 1	M1-2	C-P	M	0:07:29.540-0:07:29.806	IT2	0.38469	8	1.44114
Trial 1	M1-2	C-P	M	0:07:29.806-0:07:30.072	IT2	0.416212	8	1.55924
Trial 1	M1-2	C-P	M	0:07:30.072-0:07:30.338	IT2	1.12221	8	4.20408
Trial 1	M1-2	C-P	M	0:07:30.338-0:07:30.604	IT2	2.07857	8	7.78685
Trial 1	M1-2	C-P	M	0:07:30.604-0:07:30.870	IT2	2.55559	8	9.57387
Trial 1	M1-2	C-P	M	0:07:30.870-0:07:31.136	IT2	2.55336	8	9.56549
Trial 1	M1-2	C-P	M	0:07:31.136-0:07:31.402	IT2	1.3291	8	4.97914
Trial 1	M1-2	C-P	M	0:07:31.402-0:07:31.668	IT2	0.574495	8	2.1522
Trial 1	M1-2	C-P	M	0:07:31.668-0:07:31.934	IT2	0.836442	8	3.13353
Trial 1	M1-2	C-P	M	0:07:31.934-0:07:32.200	IT2	0.920563	8	3.44865
Trial 1	M1-2	C-P	M	0:07:32.200-0:07:32.466	IT2	1.16422	8	4.36144
Trial 1	M1-2	C-P	M	0:07:32.466-0:07:32.732	IT2	0.499873	8	1.87265
Trial 1	M1-2	C-P	M	0:07:32.732-0:07:32.998	IT2	0.254437	8	0.953177
Trial 1	M1-2	C-P	M	0:07:32.998-0:07:33.264	IT2	0.148927	8	0.557921
Trial 1	M1-2	C-P	M	0:07:33.264-0:07:33.530	IT2	0.171358	8	0.641948
Trial 1	M1-2	C-P	M	0:07:33.530-0:07:33.796	IT2	0.110128	8	0.412564
Trial 1	M1-2	C-P	M	0:07:33.796-0:07:34.062	IT2	0.341152	8	1.27804
Trial 1	M1-2	C-P	M	0:07:34.062-0:07:34.328	IT2	0.520694	8	1.95065
Trial 1	M1-2	C-P	M	0:07:34.328-0:07:34.594	IT2	0.971725	8	3.64033
Trial 1	M1-2	C-P	M	0:07:34.594-0:07:34.860	IT2	0.684584	8	2.56461
Trial 1	M1-2	C-P	M	0:07:34.860-0:07:35.126	IT2	0.384464	8	1.4403
Trial 1	M1-2	C-P	M	0:07:35.126-0:07:35.392	IT2	0.429882	8	1.61046
Trial 1	M1-2	C-P	M	0:07:35.392-0:07:35.658	IT2	0.0814782	8	0.305239
Trial 1	M1-2	C-P	M	0:07:35.658-0:07:35.924	IT2	0.299366	8	1.1215
Trial 1	M1-2	C-P	M	0:07:35.924-0:07:36.190	IT2	0.241754	8	0.905666
Trial 1	M1-2	C-P	M	0:07:36.190-0:07:36.456	IT2	0.642262	7	2.7498
Trial 1	M1-2	C-P	M	0:07:36.456-0:07:36.722	IT2	0.671102	8	2.51411
Trial 1	M1-2	C-P	M	0:07:36.722-0:07:36.988	IT2	0.584481	8	2.1896
Trial 1	M1-2	C-P	M	0:07:36.988-0:07:37.254	IT2	0.554153	8	2.07599
Trial 1	M1-2	C-P	M	0:07:37.254-0:07:37.520	IT2	0.633413	8	2.37292
Trial 1	M1-2	C-P	M	0:07:37.520-0:07:37.786	IT2	0.346723	8	1.29891
Trial 1	M1-2	C-P	M	0:07:37.786-0:07:38.052	IT2	0.0562786	8	0.210836
Trial 1	M1-2	C-P	M	0:07:38.052-0:07:38.318	IT2	0.622155	8	2.33075
Trial 1	M1-2	C-P	M	0:07:38.318-0:07:38.584	IT2	0.428334	8	1.60465
Trial 1	M1-2	C-P	M	0:07:38.584-0:07:38.850	IT2	0.260681	8	0.97658
Trial 1	M1-2	C-P	M	0:07:38.850-0:07:39.116	IT2	0.390615	8	1.46334
Trial 1	M1-2	C-P	M	0:07:39.116-0:07:39.382	IT2	0.429433	8	1.60877
Trial 1	M1-2	C-P	M	0:07:39.382-0:07:39.648	IT2	0.43565	8	1.63205
Trial 1	M1-2	C-P	M	0:07:39.648-0:07:39.914	IT2	0.115657	8	0.433275
Trial 1	M1-2	C-P	M	0:07:39.914-0:07:40.180	IT2	0.461444	8	1.72868
Trial 1	M1-2	C-P	M	0:07:40.180-0:07:40.446	IT2	0.582715	8	2.183
Trial 1	M1-2	C-P	M	0:07:40.446-0:07:40.712	IT2	0.603321	8	2.2602
Trial 1	M1-2	C-P	M	0:07:40.712-0:07:40.978	IT2	0.580988	8	2.17652
Trial 1	M1-2	C-P	M	0:07:40.978-0:07:41.244	IT2	0.243195	8	0.911066
Trial 1	M1-2	C-P	M	0:07:41.244-0:07:41.510	IT2	0.493825	8	1.84999
Trial 1	M1-2	C-P	M	0:07:41.510-0:07:41.776	IT2	0.942678	8	3.53151
Trial 1	M1-2	C-P	M	0:07:41.776-0:07:42.042	IT2	0.977904	8	3.66347
Trial 1	M1-2	C-P	M	0:07:42.042-0:07:42.308	IT2	0.400492	8	1.50035
Trial 1	M1-2	C-P	M	0:07:42.308-0:07:42.574	IT2	0.276291	8	1.03505
Trial 1	M1-2	C-P	M	0:07:42.574-0:07:42.840	IT2	0.112981	8	0.423257
Trial 1	M1-2	C-P	M	0:07:42.840-0:07:43.106	IT2	0.391385	8	1.46623
Trial 1	M1-2	C-P	M	0:07:43.106-0:07:43.372	IT2	0.122653	8	0.459491
Trial 1	M1-2	C-P	M	0:07:43.372-0:07:43.638	IT2	0.0848416	8	0.317836
Trial 1	M1-2	C-P	M	0:07:43.638-0:07:43.904	IT2	0.516982	8	1.93674
Trial 1	M1-2	C-P	M	0:07:43.904-0:07:44.170	IT2	0.355173	8	1.33058
Trial 1	M1-2	C-P	M	0:07:44.170-0:07:44.436	IT2	0.470119	8	1.76118
Trial 1	M1-2	C-P	M	0:07:44.436-0:07:44.702	IT2	0.144128	8	0.539939
Trial 1	M1-2	C-P	M	0:07:44.702-0:07:44.968	IT2	0.178668	8	0.66933
Trial 1	M1-2	C-P	M	0:07:44.968-0:07:45.234	IT2	0.0475526	8	0.178146
Trial 1	M1-2	C-P	M	0:07:45.234-0:07:45.500	IT2	0.0876942	8	0.328524
Trial 1	M1-2	C-P	M	0:07:45.500-0:07:45.766	IT2	0.0397643	8	0.148966
Trial 1	M1-2	C-P	M	0:07:45.766-0:07:46.032	IT2	0.0810187	7	0.346877
Trial 1	M1-2	C-P	M	0:07:46.032-0:07:46.298	IT2	0.16967	8	0.635628
Trial 1	M1-2	C-P	M	0:07:46.298-0:07:46.564	IT2	0.0712151	8	0.26679
Trial 1	M1-2	C-P	M	0:07:46.564-0:07:46.830	IT2	0.0740708	8	0.277486
Trial 1	M1-2	C-P	M	0:07:46.830-0:07:47.096	IT2	0.0468831	8	0.175636
Trial 1	M1-2	C-P	M	0:07:47.096-0:07:47.362	IT2	0.0618506	8	0.231708
Trial 1	M1-2	C-P	M	0:07:47.362-0:07:47.628	IT2	0.0635567	8	0.2381
Trial 1	M1-2	C-P	M	0:07:47.628-0:07:47.894	IT2	0.0538385	8	0.201691
Trial 1	M1-2	C-P	M	0:07:47.894-0:07:48.160	IT2	0.0880817	8	0.329974
Trial 1	M1-2	C-P	M	0:07:48.160-0:07:48.426	IT2	0.0806703	8	0.302213
Trial 1	M1-2	C-P	M	0:07:48.426-0:07:48.692	IT2	0.115204	8	0.431579
Trial 1	M1-2	C-P	M	0:07:48.692-0:07:48.958	IT2	0.455244	8	1.70547
Trial 1	M1-2	C-P	M	0:07:48.958-0:07:49.224	IT2	0.714813	8	2.67786
Trial 1	M1-2	C-P	M	0:07:49.224-0:07:49.490	IT2	0.256292	8	0.960136
Trial 1	M1-2	C-P	M	0:07:49.490-0:07:49.756	IT2	0.217496	8	0.814795
Trial 1	M1-2	C-P	M	0:07:49.756-0:07:50.022	IT2	0.215474	8	0.807216
Trial 1	M1-2	C-P	M	0:07:50.022-0:07:50.288	IT2	0.333835	8	1.25063
Trial 1	M1-2	C-P	M	0:07:50.288-0:07:50.554	IT2	0.411268	8	1.54071
Trial 1	M1-2	C-P	M	0:07:50.554-0:07:50.820	IT2	0.290024	8	1.0865
Trial 1	M1-2	C-P	M	0:07:50.820-0:07:51.086	IT2	0.245601	8	0.920082
Trial 1	M1-2	C-P	M	0:07:51.086-0:07:51.352	IT2	0.180022	8	0.674406
Trial 1	M1-2	C-P	M	0:07:51.352-0:07:51.618	IT2	0.0923693	8	0.346038
Trial 1	M1-2	C-P	M	0:07:51.618-0:07:51.884	IT2	0.0299385	8	0.112157
Trial 1	M1-2	C-P	M	0:07:51.884-0:07:52.150	IT2	0.127201	8	0.476524
Trial 1	M1-2	C-P	M	0:07:52.150-0:07:52.416	IT2	0.00774988	8	0.0290329
Trial 1	M1-2	C-P	M	0:07:52.416-0:07:52.682	IT2	0.0806489	8	0.302128
Trial 1	M1-2	C-P	M	0:07:52.682-0:07:52.948	IT2	0.0558668	8	0.209293
Trial 1	M1-2	C-P	M	0:07:52.948-0:07:53.214	IT2	0.0189276	8	0.0709069
Trial 1	M1-2	C-P	M	0:07:53.214-0:07:53.480	IT2	0.10264	8	0.384518
Trial 1	M1-2	C-P	M	0:07:53.480-0:07:53.746	IT2	0.0509796	8	0.190985
Trial 1	M1-2	C-P	M	0:07:53.746-0:07:54.012	IT2	0.0545699	8	0.204432
Trial 1	M1-2	C-P	M	0:07:54.012-0:07:54.278	IT2	0.0338487	8	0.126806
Trial 1	M1-2	C-P	M	0:07:54.278-0:07:54.544	IT2	0.0909106	8	0.340572
Trial 1	M1-2	C-P	M	0:07:54.544-0:07:54.810	IT2	0.0251432	8	0.0941934
Trial 1	M1-2	C-P	M	0:07:54.810-0:07:55.076	IT2	0.0682249	8	0.255586
Trial 1	M1-2	C-P	M	0:07:55.076-0:07:55.342	IT2	0.0585089	7	0.250499
Trial 1	M1-2	C-P	M	0:07:55.342-0:07:55.608	IT2	0.0436396	8	0.163486
Trial 1	M1-2	C-P	M	0:07:55.608-0:07:55.874	IT2	0.0967236	8	0.362349
Trial 1	M1-2	C-P	M	0:07:55.874-0:07:56.140	IT2	0.02697	8	0.101036
Trial 1	M1-2	C-P	M	0:07:56.140-0:07:56.406	IT2	0.114216	8	0.427884
Trial 1	M1-2	C-P	M	0:07:56.406-0:07:56.672	IT2	0.0548718	8	0.205562
Trial 1	M1-2	C-P	M	0:07:56.672-0:07:56.938	IT2	0.0577569	8	0.21637
Trial 1	M1-2	C-P	M	0:07:56.938-0:07:57.204	IT2	0.070679	8	0.264784
Trial 1	M1-2	C-P	M	0:07:57.204-0:07:57.470	IT2	0.0750719	8	0.281238
Trial 1	M1-2	C-P	M	0:07:57.470-0:07:57.736	IT2	0.0985066	8	0.369029
Trial 1	M1-2	C-P	M	0:07:57.736-0:07:58.002	IT2	0.0204741	8	0.0767007
Trial 1	M1-2	C-P	M	0:07:58.002-0:07:58.268	IT2	0.106702	8	0.39973
Trial 1	M1-2	C-P	M	0:07:58.268-0:07:58.534	IT2	0.019772	8	0.074071
Trial 1	M1-2	C-P	M	0:07:58.534-0:07:58.800	IT2	0.0501457	8	0.187857
Trial 1	M1-2	C-P	M	0:07:58.800-0:07:59.066	IT2	0.0093986	8	0.0352092
Trial 1	M1-2	C-P	M	0:07:59.066-0:07:59.332	IT2	0.0426413	8	0.159744
Trial 1	M1-2	C-P	M	0:07:59.332-0:07:59.598	IT2	0.0339351	8	0.127129
Trial 1	M1-2	C-P	M	0:07:59.598-0:07:59.864	IT2	0.0132275	8	0.0495537
Trial 1	M1-2	C-P	M	0:07:59.864-0:08:00.130	IT2	0.0643488	8	0.241066
Trial 1	M1-2	C-P	M	0:08:00.130-0:08:00.396	IT2	0.0214075	8	0.0801983
Trial 1	M1-2	C-P	M	0:08:00.396-0:08:00.662	IT2	0.0441408	8	0.165361
Trial 1	M1-2	C-P	M	0:08:00.662-0:08:00.928	IT2	0.0490967	8	0.183927
Trial 1	M1-2	C-P	M	0:08:00.928-0:08:01.194	IT2	0.0520207	8	0.194886
Trial 1	M1-2	C-P	M	0:08:01.194-0:08:01.460	IT2	0.0193691	8	0.0725612
Trial 1	M1-2	C-P	M	0:08:01.460-0:08:01.726	IT2	0.12271	8	0.459702
Trial 1	M1-2	C-P	M	0:08:01.726-0:08:01.992	IT2	0.243712	8	0.913001
Trial 1	M1-2	C-P	M	0:08:01.992-0:08:02.258	IT2	0.197864	8	0.741248
Trial 1	M1-2	C-P	M	0:08:02.258-0:08:02.524	IT2	0.501298	8	1.87799
Trial 1	M1-2	C-P	M	0:08:02.524-0:08:02.790	IT2	0.397151	8	1.48782
Trial 1	M1-2	C-P	M	0:08:02.790-0:08:03.056	IT2	0.817616	8	3.063
Trial 1	M1-2	C-P	M	0:08:03.056-0:08:03.322	IT2	0.193015	8	0.723084
Trial 1	M1-2	C-P	M	0:08:03.322-0:08:03.588	IT2	0.151268	8	0.566688
Trial 1	M1-2	C-P	M	0:08:03.588-0:08:03.854	IT2	0.203622	8	0.762821
Trial 1	M1-2	C-P	M	0:08:03.854-0:08:04.120	IT2	0.169204	8	0.633883
Trial 1	M1-2	C-P	M	0:08:04.120-0:08:04.386	IT2	0.102331	8	0.383357
Trial 1	M1-2	C-P	M	0:08:04.386-0:08:04.652	IT2	0.0949897	8	0.355854
Trial 1	M1-2	C-P	M	0:08:04.652-0:08:04.918	IT2	0.0775858	7	0.332175
Trial 1	M1-2	C-P	M	0:08:04.918-0:08:05.184	IT2	0.0634895	8	0.237847
Trial 1	M1-2	C-P	M	0:08:05.184-0:08:05.450	IT2	0.0750775	8	0.281263
Trial 1	M1-2	C-P	M	0:08:05.450-0:08:05.716	IT2	0.0400286	8	0.149956
Trial 1	M1-2	C-P	M	0:08:05.716-0:08:05.982	IT2	0.230605	8	0.863909
Trial 1	M1-2	C-P	M	0:08:05.982-0:08:06.248	IT2	0.0288288	8	0.108001
Trial 1	M1-2	C-P	M	0:08:06.248-0:08:06.514	IT2	0.103421	8	0.387441
Trial 1	M1-2	C-P	M	0:08:06.514-0:08:06.780	IT2	0.0910995	8	0.341284
Trial 1	M1-2	C-P	M	0:08:06.780-0:08:07.046	IT2	0.0405627	8	0.151958
Trial 1	M1-2	C-P	M	0:08:07.046-0:08:07.312	IT2	0.109702	8	0.410977
Trial 1	M1-2	C-P	M	0:08:07.312-0:08:07.578	IT2	0.0473668	8	0.177449
Trial 1	M1-2	C-P	M	0:08:07.578-0:08:07.844	IT2	0.209404	8	0.784472
Trial 1	M1-2	C-P	M	0:08:07.844-0:08:08.110	IT2	0.141317	8	0.529408
Trial 1	M1-2	C-P	M	0:08:08.110-0:08:08.376	IT2	0.115368	8	0.432198
Trial 1	M1-2	C-P	M	0:08:08.376-0:08:08.642	IT2	0.0544116	8	0.203838
Trial 1	M1-2	C-P	M	0:08:08.642-0:08:08.908	IT2	0.138517	8	0.518918
Trial 1	M1-2	C-P	M	0:08:08.908-0:08:09.174	IT2	0.0868208	8	0.325254
Trial 1	M1-2	C-P	M	0:08:09.174-0:08:09.440	IT2	0.0352767	8	0.132156
Trial 1	M1-2	C-P	M	0:08:09.440-0:08:09.706	IT2	0.0671916	8	0.251714
Trial 1	M1-2	C-P	M	0:08:09.706-0:08:09.972	IT2	0.00916845	8	0.0343472
Trial 1	M1-2	C-P	M	0:08:09.972-0:08:10.238	IT2	0.144497	8	0.541315
Trial 1	M1-2	C-P	M	0:08:10.238-0:08:10.504	IT2	0.0451682	8	0.169211
Trial 1	M1-2	C-P	M	0:08:10.504-0:08:10.770	IT2	0.0838158	8	0.313994
Trial 1	M1-2	C-P	M	0:08:10.770-0:08:11.036	IT2	0.0657848	8	0.246448
Trial 1	M1-2	C-P	M	0:08:11.036-0:08:11.302	IT2	0.0602728	8	0.225799
Trial 1	M1-2	C-P	M	0:08:11.302-0:08:11.568	IT2	0.0837597	8	0.313783
Trial 1	M1-2	C-P	M	0:08:11.568-0:08:11.834	IT2	0.0517996	8	0.194054
Trial 1	M1-2	C-P	M	0:08:11.834-0:08:12.100	IT2	0.0382984	8	0.143475
Trial 1	M1-2	C-P	M	0:08:12.100-0:08:12.366	IT2	0.0315693	8	0.118266
Trial 1	M1-2	C-P	M	0:08:12.366-0:08:12.632	IT2	0.0659247	8	0.246969
Trial 1	M1-2	C-P	M	0:08:12.632-0:08:12.898	IT2	0.0607021	8	0.227406
Trial 1	M1-2	C-P	M	0:08:12.898-0:08:13.164	IT2	0.0778543	8	0.29166
Trial 1	M1-2	C-P	M	0:08:13.164-0:08:13.430	IT2	0.0675695	8	0.253136
Trial 1	M1-2	C-P	M	0:08:13.430-0:08:13.696	IT2	0.0531894	8	0.19926
Trial 1	M1-2	C-P	M	0:08:13.696-0:08:13.962	IT2	0.0738981	8	0.276838
Trial 1	M1-2	C-P	M	0:08:13.962-0:08:14.228	IT2	0.0507324	8	0.190056
Trial 1	M1-2	C-P	M	0:08:14.228-0:08:14.494	IT2	0.132965	7	0.569283
Trial 1	M1-2	C-P	M	0:08:14.494-0:08:14.760	IT2	0.0189903	8	0.0711421
Trial 1	M1-2	C-P	M	0:08:14.760-0:08:15.026	IT2	0.09044	8	0.33881
Trial 1	M1-2	C-P	M	0:08:15.026-0:08:15.292	IT2	0.10726	8	0.401819
Trial 1	M1-2	C-P	M	0:08:15.292-0:08:15.558	IT2	0.054877	8	0.205583
Trial 1	M1-2	C-P	M	0:08:15.558-0:08:15.824	IT2	0.140023	8	0.524557
Trial 1	M1-2	C-P	M	0:08:15.824-0:08:16.090	IT2	0.214483	8	0.803506
Trial 1	M1-2	C-P	M	0:08:16.090-0:08:16.356	IT2	0.152341	8	0.570704
Trial 1	M1-2	C-P	M	0:08:16.356-0:08:16.622	IT2	0.0803667	8	0.301072
Trial 1	M1-2	C-P	M	0:08:16.622-0:08:16.888	IT2	0.120411	8	0.451087
Trial 1	M1-2	C-P	M	0:08:16.888-0:08:17.154	IT2	0.0833662	8	0.31231
Trial 1	M1-2	C-P	M	0:08:17.154-0:08:17.420	IT2	0.0935936	8	0.350629
Trial 1	M1-2	C-P	M	0:08:17.420-0:08:17.686	IT2	0.145091	8	0.543545
Trial 1	M1-2	C-P	M	0:08:17.686-0:08:17.952	IT2	0.128622	8	0.481847
Trial 1	M1-2	C-P	M	0:08:17.952-0:08:18.218	IT2	0.0555572	8	0.20813
Trial 1	M1-2	C-P	M	0:08:18.218-0:08:18.484	IT2	0.0291409	8	0.109168
Trial 1	M1-2	C-P	M	0:08:18.484-0:08:18.750	IT2	0.11377	8	0.426209
Trial 1	M1-2	C-P	M	0:08:18.750-0:08:19.016	IT2	0.072171	8	0.270373
Trial 1	M1-2	C-P	M	0:08:19.016-0:08:19.282	IT2	0.0927664	8	0.347526
Trial 1	M1-2	C-P	M	0:08:19.282-0:08:19.548	IT2	0.0505023	8	0.189196
Trial 1	M1-2	C-P	M	0:08:19.548-0:08:19.814	IT2	0.0413311	8	0.154838
Trial 1	M1-2	C-P	M	0:08:19.814-0:08:20.080	IT2	0.0951923	8	0.356618
Trial 1	M1-2	C-P	M	0:08:20.080-0:08:20.346	IT2	0.0221645	8	0.0830344
Trial 1	M1-2	C-P	M	0:08:20.346-0:08:20.612	IT2	0.0252565	8	0.0946162
Trial 1	M1-2	C-P	M	0:08:20.612-0:08:20.878	IT2	0.159075	8	0.595928
Trial 1	M1-2	C-P	M	0:08:20.878-0:08:21.144	IT2	0.0857911	8	0.321395
Trial 1	M1-2	C-P	M	0:08:21.144-0:08:21.410	IT2	0.0548368	8	0.205436
Trial 1	M1-2	C-P	M	0:08:21.410-0:08:21.676	IT2	0.0554189	8	0.207612
Trial 1	M1-2	C-P	M	0:08:21.676-0:08:21.942	IT2	0.0569797	8	0.213459
Trial 1	M1-2	C-P	M	0:08:21.942-0:08:22.208	IT2	0.154685	8	0.579491
Trial 1	M1-2	C-P	M	0:08:22.208-0:08:22.474	IT2	0.0632688	8	0.237021
Trial 1	M1-2	C-P	M	0:08:22.474-0:08:22.740	IT2	0.126929	8	0.475504
Trial 1	M1-2	C-P	M	0:08:22.740-0:08:23.006	IT2	0.0501951	8	0.188045
Trial 1	M1-2	C-P	M	0:08:23.006-0:08:23.272	IT2	0.0743487	8	0.278531
Trial 1	M1-2	C-P	M	0:08:23.272-0:08:23.538	IT2	0.123627	8	0.463143
Trial 1	M1-2	C-P	M	0:08:23.538-0:08:23.804	IT2	0.0311319	8	0.116627
Trial 1	M1-2	C-P	M	0:08:23.804-0:08:24.070	IT2	0.141678	7	0.606586
Trial 1	M1-2	C-P	M	0:08:24.070-0:08:24.336	IT2	0.162275	8	0.607923
Trial 1	M1-2	C-P	M	0:08:24.336-0:08:24.602	IT2	0.107485	8	0.402662
Trial 1	M1-2	C-P	M	0:08:24.602-0:08:24.868	IT2	0.0902009	8	0.337914
Trial 1	M1-2	C-P	M	0:08:24.868-0:08:25.134	IT2	0.107383	8	0.402282
Trial 1	M1-2	C-P	M	0:08:25.134-0:08:25.400	IT2	0.0292314	8	0.109507
Trial 1	M1-2	C-P	M	0:08:25.400-0:08:25.666	IT2	0.0630764	8	0.236299
Trial 1	M1-2	C-P	M	0:08:25.666-0:08:25.932	IT2	0.0972818	8	0.364443
Trial 1	M1-2	C-P	M	0:08:25.932-0:08:26.198	IT2	0.0494629	8	0.1853
Trial 1	M1-2	C-P	M	0:08:26.198-0:08:26.464	IT2	0.146098	8	0.547318
Trial 1	M1-2	C-P	M	0:08:26.464-0:08:26.730	IT2	0.152248	8	0.570353
Trial 1	M1-2	C-P	M	0:08:26.730-0:08:26.996	IT2	0.0917036	8	0.343547
Trial 1	M1-2	C-P	M	0:08:26.996-0:08:27.262	IT2	0.0445983	8	0.167076
Trial 1	M1-2	C-P	M	0:08:27.262-0:08:27.528	IT2	0.0650053	8	0.243525
Trial 1	M1-2	C-P	M	0:08:27.528-0:08:27.794	IT2	0.0643962	8	0.241246
Trial 1	M1-2	C-P	M	0:08:27.794-0:08:28.060	IT2	0.0347851	8	0.130314
Trial 1	M1-2	C-P	M	0:08:28.060-0:08:28.326	IT2	0.0955329	8	0.357889
Trial 1	M1-2	C-P	M	0:08:28.326-0:08:28.592	IT2	0.0382437	8	0.14327
Trial 1	M1-2	C-P	M	0:08:28.592-0:08:28.858	IT2	0.129793	8	0.486236
Trial 1	M1-2	C-P	M	0:08:28.858-0:08:29.124	IT2	0.0425752	8	0.159496
Trial 1	M1-2	C-P	M	0:08:29.124-0:08:29.390	IT2	0.0859959	8	0.322166
Trial 1	M1-2	C-P	M	0:08:29.390-0:08:29.656	IT2	0.199164	8	0.746128
Trial 1	M1-2	C-P	M	0:08:29.656-0:08:29.922	IT2	0.0514682	8	0.192811
Trial 1	M1-2	C-P	M	0:08:29.922-0:08:30.188	IT2	0.0528505	8	0.197994
Trial 1	M1-2	C-P	M	0:08:30.188-0:08:30.454	IT2	0.0387311	8	0.145099
Trial 1	M1-2	C-P	M	0:08:30.454-0:08:30.720	IT2	0.0923738	8	0.346053
Trial 1	M1-2	C-P	M	0:08:30.720-0:08:30.986	IT2	0.0991609	8	0.371479
Trial 1	M1-2	C-P	M	0:08:30.986-0:08:31.252	IT2	0.124778	8	0.467449
Trial 1	M1-2	C-P	M	0:08:31.252-0:08:31.518	IT2	0.0771118	8	0.288883
Trial 1	M1-2	C-P	M	0:08:31.518-0:08:31.784	IT2	0.209246	8	0.783883
Trial 1	M1-2	C-P	M	0:08:31.784-0:08:32.050	IT2	0.0314723	8	0.117903
Trial 1	M1-2	C-P	M	0:08:32.050-0:08:32.316	IT2	0.188289	8	0.705392
Trial 1	M1-2	C-P	M	0:08:32.316-0:08:32.582	IT2	0.0756324	8	0.283335
Trial 1	M1-2	C-P	M	0:08:32.582-0:08:32.848	IT2	0.0403575	8	0.151191
Trial 1	M1-2	C-P	M	0:08:32.848-0:08:33.114	IT2	0.0907346	8	0.339916
Trial 1	M1-2	C-P	M	0:08:33.114-0:08:33.380	IT2	0.053462	7	0.228895
Trial 1	M1-2	C-P	M	0:08:33.380-0:08:33.646	IT2	0.0680016	8	0.254751
Trial 1	M1-2	C-P	M	0:08:33.646-0:08:33.912	IT2	0.0226137	8	0.0847161
Trial 1	M1-2	C-P	M	0:08:33.912-0:08:34.178	IT2	0.04205	8	0.157528
Trial 1	M1-2	C-P	M	0:08:34.178-0:08:34.444	IT2	0.0767241	8	0.287427
Trial 1	M1-2	C-P	M	0:08:34.444-0:08:34.710	IT2	0.0920625	8	0.344891
Trial 1	M1-2	C-P	M	0:08:34.710-0:08:34.976	IT2	0.147659	8	0.553162
Trial 1	M1-2	C-P	M	0:08:34.976-0:08:35.242	IT2	0.053348	8	0.199855
Trial 1	M1-2	C-P	M	0:08:35.242-0:08:35.508	IT2	0.103731	8	0.388606
Trial 1	M1-2	C-P	M	0:08:35.508-0:08:35.774	IT2	0.0171218	8	0.0641431
Trial 1	M1-2	C-P	M	0:08:35.774-0:08:36.040	IT2	0.131999	8	0.494501
Trial 1	M1-2	C-P	M	0:08:36.040-0:08:36.306	IT2	0.114818	8	0.430141
Trial 1	M1-2	C-P	M	0:08:36.306-0:08:36.572	IT2	0.0857623	8	0.321287
Trial 1	M1-2	C-P	M	0:08:36.572-0:08:36.838	IT2	0.103303	8	0.386997
Trial 1	M1-2	C-P	M	0:08:36.838-0:08:37.104	IT2	0.0167291	8	0.0626712
Trial 1	M1-2	C-P	M	0:08:37.104-0:08:37.370	IT2	0.0965492	8	0.361699
Trial 1	M1-2	C-P	M	0:08:37.370-0:08:37.636	IT2	0.039064	8	0.146342
Trial 1	M1-2	C-P	M	0:08:37.636-0:08:37.902	IT2	0.111355	8	0.417163
Trial 1	M1-2	C-P	M	0:08:37.902-0:08:38.168	IT2	0.0184808	8	0.0692332
Trial 1	M1-2	C-P	M	0:08:38.168-0:08:38.434	IT2	0.100891	8	0.377964
Trial 1	M1-2	C-P	M	0:08:38.434-0:08:38.700	IT2	0.080113	8	0.300122
Trial 1	M1-2	C-P	M	0:08:38.700-0:08:38.966	IT2	0.0774727	8	0.290231
Trial 1	M1-2	C-P	M	0:08:38.966-0:08:39.232	IT2	0.0546295	8	0.204657
Trial 1	M1-2	C-P	M	0:08:39.232-0:08:39.498	IT2	0.0135588	8	0.050794
Trial 1	M1-2	C-P	M	0:08:39.498-0:08:39.764	IT2	0.0782427	8	0.293115
Trial 1	M1-2	C-P	M	0:08:39.764-0:08:40.030	IT2	0.0423242	8	0.158556
Trial 1	M1-2	C-P	M	0:08:40.030-0:08:40.296	IT2	0.227271	8	0.851408
Trial 1	M1-2	C-P	M	0:08:40.296-0:08:40.562	IT2	0.060906	8	0.22817
Trial 1	M1-2	C-P	M	0:08:40.562-0:08:40.828	IT2	0.0742184	8	0.278042
Trial 1	M1-2	C-P	M	0:08:40.828-0:08:41.094	IT2	0.0552281	8	0.206899
Trial 1	M1-2	C-P	M	0:08:41.094-0:08:41.360	IT2	0.111032	8	0.415953
Trial 1	M1-2	C-P	M	0:08:41.360-0:08:41.626	IT2	0.0513558	8	0.19239
Trial 1	M1-2	C-P	M	0:08:41.626-0:08:41.892	IT2	0.0238146	8	0.0892156
Trial 1	M1-2	C-P	M	0:08:41.892-0:08:42.158	IT2	0.151438	8	0.567325
Trial 1	M1-2	C-P	M	0:08:42.158-0:08:42.424	IT2	0.106321	8	0.398309
Trial 1	M1-2	C-P	M	0:08:42.424-0:08:42.690	IT2	0.115744	8	0.433603
Trial 1	M1-2	C-P	M	0:08:42.690-0:08:42.956	IT2	0.0395474	7	0.169319
Trial 1	M1-2	C-P	M	0:08:42.956-0:08:43.222	IT2	0.113197	8	0.42406
Trial 1	M1-2	C-P	M	0:08:43.222-0:08:43.488	IT2	0.0383179	8	0.143548
Trial 1	M1-2	C-P	M	0:08:43.488-0:08:43.754	IT2	0.0562966	8	0.210899
Trial 1	M1-2	C-P	M	0:08:43.754-0:08:44.020	IT2	0.0958024	8	0.358897
Trial 1	M1-2	C-P	M	0:08:44.020-0:08:44.286	IT2	0.0428354	8	0.160471
Trial 1	M1-2	C-P	M	0:08:44.286-0:08:44.552	IT2	0.176261	8	0.660324
Trial 1	M1-2	C-P	M	0:08:44.552-0:08:44.818	IT2	0.115329	8	0.432058
Trial 1	M1-2	C-P	M	0:08:44.818-0:08:45.084	IT2	0.0550094	8	0.206078
Trial 1	M1-2	C-P	M	0:08:45.084-0:08:45.350	IT2	0.0201692	8	0.0755587
Trial 1	M1-2	C-P	M	0:08:45.350-0:08:45.616	IT2	0.0596503	8	0.223465
Trial 1	M1-2	C-P	M	0:08:45.616-0:08:45.882	IT2	0.0222157	8	0.0832253
Trial 1	M1-2	C-P	M	0:08:45.882-0:08:46.148	IT2	0.0423247	8	0.158558
Trial 1	M1-2	C-P	M	0:08:46.148-0:08:46.414	IT2	0.0759038	8	0.284352
Trial 1	M1-2	C-P	M	0:08:46.414-0:08:46.680	IT2	0.0362635	8	0.135852
Trial 1	M1-2	C-P	M	0:08:46.680-0:08:46.946	IT2	0.0635486	8	0.238067
Trial 1	M1-2	C-P	M	0:08:46.946-0:08:47.212	IT2	0.0606149	8	0.227078
Trial 1	M1-2	C-P	M	0:08:47.212-0:08:47.478	IT2	0.0210529	8	0.0788696
Trial 1	M1-2	C-P	M	0:08:47.478-0:08:47.744	IT2	0.034671	8	0.129885
Trial 1	M1-2	C-P	M	0:08:47.744-0:08:48.010	IT2	0.0728177	8	0.272796
Trial 1	M1-2	C-P	M	0:08:48.010-0:08:48.276	IT2	0.202664	8	0.759228
Trial 1	M1-2	C-P	M	0:08:48.276-0:08:48.542	IT2	0.145351	8	0.544519
Trial 1	M1-2	C-P	M	0:08:48.542-0:08:48.808	IT2	0.0601554	8	0.225356
Trial 1	M1-2	C-P	M	0:08:48.808-0:08:49.074	IT2	0.0996319	8	0.373248
Trial 1	M1-2	C-P	M	0:08:49.074-0:08:49.340	IT2	0.137834	8	0.516357
Trial 1	M1-2	C-P	M	0:08:49.340-0:08:49.606	IT2	0.0347815	8	0.130302
Trial 1	M1-2	C-P	M	0:08:49.606-0:08:49.872	IT2	0.0880292	8	0.329776
Trial 1	M1-2	C-P	M	0:08:49.872-0:08:50.138	IT2	0.0083344	8	0.0312231
Trial 1	M1-2	C-P	M	0:08:50.138-0:08:50.404	IT2	0.168598	8	0.631605
Trial 1	M1-2	C-P	M	0:08:50.404-0:08:50.670	IT2	0.069607	8	0.260767
Trial 1	M1-2	C-P	M	0:08:50.670-0:08:50.936	IT2	0.0542923	8	0.203391
[truncated: 121,364 more rows]

## Sheet: Day 4
Raw velocity data, extracted via ethovision, which is fed to R source code 1 to detect and extract darts, and to produce velocity traces
Showing Data from Acquisition Day 4 for all animals in Experiment 4
Used to calculate Darts/minute as seen in Figure 8-figure supplement 1
Trial	Animal	Group	Sex	TimeStamp	StimPeriod	Distance	Samples	Velocity
Trial 1	M1-2	C-P	M	Start-0:00:00.266	BL	-	0	-
Trial 1	M1-2	C-P	M	0:00:00.266-0:00:00.532	BL	-	0	-
Trial 1	M1-2	C-P	M	0:00:00.532-0:00:00.798	BL	-	0	-
Trial 1	M1-2	C-P	M	0:00:00.798-0:00:01.064	BL	-	0	-
Trial 1	M1-2	C-P	M	0:00:01.064-0:00:01.330	BL	-	0	-
Trial 1	M1-2	C-P	M	0:00:01.330-0:00:01.596	BL	-	0	-
Trial 1	M1-2	C-P	M	0:00:01.596-0:00:01.862	BL	-	0	-
Trial 1	M1-2	C-P	M	0:00:01.862-0:00:02.128	BL	-	0	-
Trial 1	M1-2	C-P	M	0:00:02.128-0:00:02.394	BL	-	0	-
Trial 1	M1-2	C-P	M	0:00:02.394-0:00:02.660	BL	-	0	-
Trial 1	M1-2	C-P	M	0:00:02.660-0:00:02.926	BL	-	0	-
Trial 1	M1-2	C-P	M	0:00:02.926-0:00:03.192	BL	-	0	-
Trial 1	M1-2	C-P	M	0:00:03.192-0:00:03.458	BL	-	0	-
Trial 1	M1-2	C-P	M	0:00:03.458-0:00:03.724	BL	-	0	-
Trial 1	M1-2	C-P	M	0:00:03.724-0:00:03.990	BL	-	0	-
Trial 1	M1-2	C-P	M	0:00:03.990-0:00:04.256	BL	-	0	-
Trial 1	M1-2	C-P	M	0:00:04.256-0:00:04.522	BL	-	0	-
Trial 1	M1-2	C-P	M	0:00:04.522-0:00:04.788	BL	-	0	-
Trial 1	M1-2	C-P	M	0:00:04.788-0:00:05.054	BL	-	0	-
[truncated: 123,341 more rows]

## Sheet: Day 5
Raw velocity data, extracted via ethovision, which is fed to R source code 1 to detect and extract darts, and to produce velocity traces
[truncated: 55,364 more rows]
