# Supplementary material for: Conditional and unconditional components of aversively motivated freezing, flight and darting in mice
Source: eLife. 2022 May 26;11:e75663. doi: 10.7554/eLife.75663 (PMC9173745; doi:10.7554/eLife.75663)
Supplement: Figure 8—source data 1. [file elife-75663-fig8-data1.xlsx]

## Sheet: Sheet1
Raw velocity data, extracted via ethovision, which is fed to R source code 1 to detect and extract darts, and to produce velocity traces
Showing Data from Test Day 5 for all animals in Experiment 4
Used to calculate Darts/minute as seen in Figure 8-figure supplement 1
Used to produce velocity traces as seen in Figure 8
Trial	Animal	Group	Sex	TimeStamp	StimPeriod	Distance	Samples	Velocity
Trial 1	M1-2	C-P	M	Start-0:00:00.266	BL	0.487887	7	2.08886
Trial 1	M1-2	C-P	M	0:00:00.266-0:00:00.532	BL	0.159287	8	0.596727
Trial 1	M1-2	C-P	M	0:00:00.532-0:00:00.798	BL	0.217605	8	0.8152
Trial 1	M1-2	C-P	M	0:00:00.798-0:00:01.064	BL	0.244881	8	0.917385
Trial 1	M1-2	C-P	M	0:00:01.064-0:00:01.330	BL	0.0798932	8	0.299299
Trial 1	M1-2	C-P	M	0:00:01.330-0:00:01.596	BL	0.144767	8	0.542336
Trial 1	M1-2	C-P	M	0:00:01.596-0:00:01.862	BL	0.191972	8	0.719173
Trial 1	M1-2	C-P	M	0:00:01.862-0:00:02.128	BL	0.207967	8	0.779095
Trial 1	M1-2	C-P	M	0:00:02.128-0:00:02.394	BL	0.40286	8	1.50921
Trial 1	M1-2	C-P	M	0:00:02.394-0:00:02.660	BL	0.345968	8	1.29608
Trial 1	M1-2	C-P	M	0:00:02.660-0:00:02.926	BL	0.345249	8	1.29339
Trial 1	M1-2	C-P	M	0:00:02.926-0:00:03.192	BL	0.301596	8	1.12985
Trial 1	M1-2	C-P	M	0:00:03.192-0:00:03.458	BL	0.14829	8	0.555532
Trial 1	M1-2	C-P	M	0:00:03.458-0:00:03.724	BL	0.187314	8	0.701724
Trial 1	M1-2	C-P	M	0:00:03.724-0:00:03.990	BL	0.124317	8	0.465721
Trial 1	M1-2	C-P	M	0:00:03.990-0:00:04.256	BL	0.117458	8	0.440029
Trial 1	M1-2	C-P	M	0:00:04.256-0:00:04.522	BL	0.23075	8	0.864449
Trial 1	M1-2	C-P	M	0:00:04.522-0:00:04.788	BL	0.210783	8	0.789643
Trial 1	M1-2	C-P	M	0:00:04.788-0:00:05.054	BL	0.133472	8	0.500024
Trial 1	M1-2	C-P	M	0:00:05.054-0:00:05.320	BL	0.174702	8	0.654476
Trial 1	M1-2	C-P	M	0:00:05.320-0:00:05.586	BL	0.132452	8	0.4962
Trial 1	M1-2	C-P	M	0:00:05.586-0:00:05.852	BL	0.121595	8	0.455524
Trial 1	M1-2	C-P	M	0:00:05.852-0:00:06.118	BL	0.12287	8	0.460301
Trial 1	M1-2	C-P	M	0:00:06.118-0:00:06.384	BL	0.17807	8	0.667094
Trial 1	M1-2	C-P	M	0:00:06.384-0:00:06.650	BL	0.371781	8	1.39278
Trial 1	M1-2	C-P	M	0:00:06.650-0:00:06.916	BL	0.199989	8	0.74921
Trial 1	M1-2	C-P	M	0:00:06.916-0:00:07.182	BL	0.151896	8	0.569037
Trial 1	M1-2	C-P	M	0:00:07.182-0:00:07.448	BL	0.0818129	8	0.306491
Trial 1	M1-2	C-P	M	0:00:07.448-0:00:07.714	BL	0.098659	8	0.369603
Trial 1	M1-2	C-P	M	0:00:07.714-0:00:07.980	BL	0.155355	8	0.582002
Trial 1	M1-2	C-P	M	0:00:07.980-0:00:08.246	BL	0.173887	8	0.651424
Trial 1	M1-2	C-P	M	0:00:08.246-0:00:08.512	BL	0.207676	8	0.778001
Trial 1	M1-2	C-P	M	0:00:08.512-0:00:08.778	BL	0.0925526	8	0.346727
Trial 1	M1-2	C-P	M	0:00:08.778-0:00:09.044	BL	0.128155	8	0.4801
Trial 1	M1-2	C-P	M	0:00:09.044-0:00:09.310	BL	0.207367	8	0.776847
Trial 1	M1-2	C-P	M	0:00:09.310-0:00:09.576	BL	0.0937304	7	0.4013
Trial 1	M1-2	C-P	M	0:00:09.576-0:00:09.842	BL	0.147088	8	0.551025
Trial 1	M1-2	C-P	M	0:00:09.842-0:00:10.108	BL	0.177068	8	0.663342
Trial 1	M1-2	C-P	M	0:00:10.108-0:00:10.374	BL	0.118977	8	0.445712
Trial 1	M1-2	C-P	M	0:00:10.374-0:00:10.640	BL	0.0766516	8	0.287159
Trial 1	M1-2	C-P	M	0:00:10.640-0:00:10.906	BL	0.156478	8	0.586209
Trial 1	M1-2	C-P	M	0:00:10.906-0:00:11.172	BL	0.119195	8	0.446532
Trial 1	M1-2	C-P	M	0:00:11.172-0:00:11.438	BL	0.131656	8	0.493219
Trial 1	M1-2	C-P	M	0:00:11.438-0:00:11.704	BL	0.137744	8	0.516021
Trial 1	M1-2	C-P	M	0:00:11.704-0:00:11.970	BL	0.153191	8	0.573899
Trial 1	M1-2	C-P	M	0:00:11.970-0:00:12.236	BL	0.143654	8	0.53816
Trial 1	M1-2	C-P	M	0:00:12.236-0:00:12.502	BL	0.124384	8	0.465981
Trial 1	M1-2	C-P	M	0:00:12.502-0:00:12.768	BL	0.0759164	8	0.2844
Trial 1	M1-2	C-P	M	0:00:12.768-0:00:13.034	BL	0.118266	8	0.443053
Trial 1	M1-2	C-P	M	0:00:13.034-0:00:13.300	BL	0.108684	8	0.407159
Trial 1	M1-2	C-P	M	0:00:13.300-0:00:13.566	BL	0.10187	8	0.381631
Trial 1	M1-2	C-P	M	0:00:13.566-0:00:13.832	BL	0.239121	8	0.895811
Trial 1	M1-2	C-P	M	0:00:13.832-0:00:14.098	BL	0.0863566	8	0.323511
Trial 1	M1-2	C-P	M	0:00:14.098-0:00:14.364	BL	0.0897679	8	0.336291
Trial 1	M1-2	C-P	M	0:00:14.364-0:00:14.630	BL	0.116924	8	0.438023
Trial 1	M1-2	C-P	M	0:00:14.630-0:00:14.896	BL	0.0875725	8	0.328069
Trial 1	M1-2	C-P	M	0:00:14.896-0:00:15.162	BL	0.125324	8	0.469498
Trial 1	M1-2	C-P	M	0:00:15.162-0:00:15.428	BL	0.0712758	8	0.267018
Trial 1	M1-2	C-P	M	0:00:15.428-0:00:15.694	BL	0.158222	8	0.592738
Trial 1	M1-2	C-P	M	0:00:15.694-0:00:15.960	BL	0.061128	8	0.229002
Trial 1	M1-2	C-P	M	0:00:15.960-0:00:16.226	BL	0.141907	8	0.531617
Trial 1	M1-2	C-P	M	0:00:16.226-0:00:16.492	BL	0.0924321	8	0.346276
Trial 1	M1-2	C-P	M	0:00:16.492-0:00:16.758	BL	0.182589	8	0.684027
Trial 1	M1-2	C-P	M	0:00:16.758-0:00:17.024	BL	0.127114	8	0.476203
Trial 1	M1-2	C-P	M	0:00:17.024-0:00:17.290	BL	0.164654	8	0.616831
Trial 1	M1-2	C-P	M	0:00:17.290-0:00:17.556	BL	0.139889	8	0.524055
Trial 1	M1-2	C-P	M	0:00:17.556-0:00:17.822	BL	0.214648	8	0.80412
Trial 1	M1-2	C-P	M	0:00:17.822-0:00:18.088	BL	0.268473	8	1.00577
Trial 1	M1-2	C-P	M	0:00:18.088-0:00:18.354	BL	0.271767	8	1.01811
Trial 1	M1-2	C-P	M	0:00:18.354-0:00:18.620	BL	0.444608	8	1.66561
Trial 1	M1-2	C-P	M	0:00:18.620-0:00:18.886	BL	0.255564	8	0.957406
Trial 1	M1-2	C-P	M	0:00:18.886-0:00:19.152	BL	0.441763	7	1.89138
Trial 1	M1-2	C-P	M	0:00:19.152-0:00:19.418	BL	0.402386	8	1.50744
Trial 1	M1-2	C-P	M	0:00:19.418-0:00:19.684	BL	0.612069	8	2.29296
Trial 1	M1-2	C-P	M	0:00:19.684-0:00:19.950	BL	0.570249	8	2.1363
Trial 1	M1-2	C-P	M	0:00:19.950-0:00:20.216	BL	0.476383	8	1.78465
Trial 1	M1-2	C-P	M	0:00:20.216-0:00:20.482	BL	0.724709	8	2.71493
Trial 1	M1-2	C-P	M	0:00:20.482-0:00:20.748	BL	0.868925	8	3.25522
Trial 1	M1-2	C-P	M	0:00:20.748-0:00:21.014	BL	1.19426	8	4.47397
Trial 1	M1-2	C-P	M	0:00:21.014-0:00:21.280	BL	1.41685	8	5.30784
Trial 1	M1-2	C-P	M	0:00:21.280-0:00:21.546	BL	0.789544	8	2.95782
Trial 1	M1-2	C-P	M	0:00:21.546-0:00:21.812	BL	0.624631	8	2.34003
Trial 1	M1-2	C-P	M	0:00:21.812-0:00:22.078	BL	2.42049	8	9.06788
Trial 1	M1-2	C-P	M	0:00:22.078-0:00:22.344	BL	2.76355	8	10.3529
Trial 1	M1-2	C-P	M	0:00:22.344-0:00:22.610	BL	0.761627	8	2.85326
Trial 1	M1-2	C-P	M	0:00:22.610-0:00:22.876	BL	0.538068	8	2.01573
Trial 1	M1-2	C-P	M	0:00:22.876-0:00:23.142	BL	0.169341	8	0.634393
Trial 1	M1-2	C-P	M	0:00:23.142-0:00:23.408	BL	0.0791382	8	0.296472
Trial 1	M1-2	C-P	M	0:00:23.408-0:00:23.674	BL	0.0523059	8	0.19595
Trial 1	M1-2	C-P	M	0:00:23.674-0:00:23.940	BL	0.347792	8	1.30292
Trial 1	M1-2	C-P	M	0:00:23.940-0:00:24.206	BL	0.241047	8	0.903016
Trial 1	M1-2	C-P	M	0:00:24.206-0:00:24.472	BL	0.381515	8	1.42925
Trial 1	M1-2	C-P	M	0:00:24.472-0:00:24.738	BL	0.339399	8	1.27147
Trial 1	M1-2	C-P	M	0:00:24.738-0:00:25.004	BL	0.340641	8	1.27612
Trial 1	M1-2	C-P	M	0:00:25.004-0:00:25.270	BL	0.343959	8	1.28856
Trial 1	M1-2	C-P	M	0:00:25.270-0:00:25.536	BL	0.144052	8	0.539652
Trial 1	M1-2	C-P	M	0:00:25.536-0:00:25.802	BL	0.171885	8	0.643926
Trial 1	M1-2	C-P	M	0:00:25.802-0:00:26.068	BL	0.0734318	8	0.275096
Trial 1	M1-2	C-P	M	0:00:26.068-0:00:26.334	BL	0.0574112	8	0.215075
Trial 1	M1-2	C-P	M	0:00:26.334-0:00:26.600	BL	0.0857708	8	0.32132
Trial 1	M1-2	C-P	M	0:00:26.600-0:00:26.866	BL	0.0766274	8	0.287064
Trial 1	M1-2	C-P	M	0:00:26.866-0:00:27.132	BL	0.103098	8	0.386231
Trial 1	M1-2	C-P	M	0:00:27.132-0:00:27.398	BL	0.046539	8	0.174347
Trial 1	M1-2	C-P	M	0:00:27.398-0:00:27.664	BL	0.181123	8	0.678531
Trial 1	M1-2	C-P	M	0:00:27.664-0:00:27.930	BL	0.102659	8	0.384587
Trial 1	M1-2	C-P	M	0:00:27.930-0:00:28.196	BL	0.0755821	8	0.283149
Trial 1	M1-2	C-P	M	0:00:28.196-0:00:28.462	BL	0.0798677	8	0.299203
Trial 1	M1-2	C-P	M	0:00:28.462-0:00:28.728	BL	0.0543611	7	0.232741
Trial 1	M1-2	C-P	M	0:00:28.728-0:00:28.994	BL	0.185046	8	0.693232
Trial 1	M1-2	C-P	M	0:00:28.994-0:00:29.260	BL	0.0693244	8	0.259705
Trial 1	M1-2	C-P	M	0:00:29.260-0:00:29.526	BL	0.0652976	8	0.24462
Trial 1	M1-2	C-P	M	0:00:29.526-0:00:29.792	BL	0.077842	8	0.291615
Trial 1	M1-2	C-P	M	0:00:29.792-0:00:30.058	BL	0.128714	8	0.482193
Trial 1	M1-2	C-P	M	0:00:30.058-0:00:30.324	BL	0.132629	8	0.496857
Trial 1	M1-2	C-P	M	0:00:30.324-0:00:30.590	BL	0.0677137	8	0.253671
Trial 1	M1-2	C-P	M	0:00:30.590-0:00:30.856	BL	0.117801	8	0.44131
Trial 1	M1-2	C-P	M	0:00:30.856-0:00:31.122	BL	0.0474425	8	0.177731
Trial 1	M1-2	C-P	M	0:00:31.122-0:00:31.388	BL	0.0975373	8	0.365397
Trial 1	M1-2	C-P	M	0:00:31.388-0:00:31.654	BL	0.0960515	8	0.359836
Trial 1	M1-2	C-P	M	0:00:31.654-0:00:31.920	BL	0.0986483	8	0.369563
Trial 1	M1-2	C-P	M	0:00:31.920-0:00:32.186	BL	0.0608488	8	0.227959
Trial 1	M1-2	C-P	M	0:00:32.186-0:00:32.452	BL	0.105443	8	0.395014
Trial 1	M1-2	C-P	M	0:00:32.452-0:00:32.718	BL	0.0408475	8	0.153024
Trial 1	M1-2	C-P	M	0:00:32.718-0:00:32.984	BL	0.0558996	8	0.209413
Trial 1	M1-2	C-P	M	0:00:32.984-0:00:33.250	BL	0.093281	8	0.349454
Trial 1	M1-2	C-P	M	0:00:33.250-0:00:33.516	BL	0.10374	8	0.388638
Trial 1	M1-2	C-P	M	0:00:33.516-0:00:33.782	BL	0.0879318	8	0.329414
Trial 1	M1-2	C-P	M	0:00:33.782-0:00:34.048	BL	0.0276268	8	0.103496
Trial 1	M1-2	C-P	M	0:00:34.048-0:00:34.314	BL	0.0789466	8	0.295753
Trial 1	M1-2	C-P	M	0:00:34.314-0:00:34.580	BL	0.0996048	8	0.373143
Trial 1	M1-2	C-P	M	0:00:34.580-0:00:34.846	BL	0.0697492	8	0.2613
Trial 1	M1-2	C-P	M	0:00:34.846-0:00:35.112	BL	0.114483	8	0.428884
Trial 1	M1-2	C-P	M	0:00:35.112-0:00:35.378	BL	0.0837873	8	0.313888
Trial 1	M1-2	C-P	M	0:00:35.378-0:00:35.644	BL	0.101013	8	0.378422
Trial 1	M1-2	C-P	M	0:00:35.644-0:00:35.910	BL	0.0583432	8	0.218568
Trial 1	M1-2	C-P	M	0:00:35.910-0:00:36.176	BL	0.0854344	8	0.320059
Trial 1	M1-2	C-P	M	0:00:36.176-0:00:36.442	BL	0.0627721	8	0.235158
Trial 1	M1-2	C-P	M	0:00:36.442-0:00:36.708	BL	0.1173	8	0.439432
Trial 1	M1-2	C-P	M	0:00:36.708-0:00:36.974	BL	0.131182	8	0.491438
Trial 1	M1-2	C-P	M	0:00:36.974-0:00:37.240	BL	0.0679614	8	0.254599
Trial 1	M1-2	C-P	M	0:00:37.240-0:00:37.506	BL	0.0775937	8	0.290686
Trial 1	M1-2	C-P	M	0:00:37.506-0:00:37.772	BL	0.0959766	8	0.359549
Trial 1	M1-2	C-P	M	0:00:37.772-0:00:38.038	BL	0.151648	7	0.649274
Trial 1	M1-2	C-P	M	0:00:38.038-0:00:38.304	BL	0.106092	8	0.397447
Trial 1	M1-2	C-P	M	0:00:38.304-0:00:38.570	BL	0.0965903	8	0.361849
Trial 1	M1-2	C-P	M	0:00:38.570-0:00:38.836	BL	0.0784892	8	0.29404
Trial 1	M1-2	C-P	M	0:00:38.836-0:00:39.102	BL	0.0762925	8	0.285811
Trial 1	M1-2	C-P	M	0:00:39.102-0:00:39.368	BL	0.0335124	8	0.125545
Trial 1	M1-2	C-P	M	0:00:39.368-0:00:39.634	BL	0.0304161	8	0.113948
Trial 1	M1-2	C-P	M	0:00:39.634-0:00:39.900	BL	0.108404	8	0.406107
Trial 1	M1-2	C-P	M	0:00:39.900-0:00:40.166	BL	0.0680782	8	0.255039
Trial 1	M1-2	C-P	M	0:00:40.166-0:00:40.432	BL	0.0858601	8	0.321653
Trial 1	M1-2	C-P	M	0:00:40.432-0:00:40.698	BL	0.0979316	8	0.366877
Trial 1	M1-2	C-P	M	0:00:40.698-0:00:40.964	BL	0.0883755	8	0.331081
Trial 1	M1-2	C-P	M	0:00:40.964-0:00:41.230	BL	0.0760495	8	0.2849
Trial 1	M1-2	C-P	M	0:00:41.230-0:00:41.496	BL	0.0527493	8	0.197612
Trial 1	M1-2	C-P	M	0:00:41.496-0:00:41.762	BL	0.0434009	8	0.162592
Trial 1	M1-2	C-P	M	0:00:41.762-0:00:42.028	BL	0.0910403	8	0.341058
Trial 1	M1-2	C-P	M	0:00:42.028-0:00:42.294	BL	0.053569	8	0.200683
Trial 1	M1-2	C-P	M	0:00:42.294-0:00:42.560	BL	0.0706841	8	0.2648
Trial 1	M1-2	C-P	M	0:00:42.560-0:00:42.826	BL	0.136492	8	0.511333
Trial 1	M1-2	C-P	M	0:00:42.826-0:00:43.092	BL	0.251941	8	0.943834
Trial 1	M1-2	C-P	M	0:00:43.092-0:00:43.358	BL	0.400572	8	1.50065
Trial 1	M1-2	C-P	M	0:00:43.358-0:00:43.624	BL	0.451889	8	1.6929
Trial 1	M1-2	C-P	M	0:00:43.624-0:00:43.890	BL	0.447708	8	1.67723
Trial 1	M1-2	C-P	M	0:00:43.890-0:00:44.156	BL	0.277955	8	1.04129
Trial 1	M1-2	C-P	M	0:00:44.156-0:00:44.422	BL	0.186979	8	0.700472
Trial 1	M1-2	C-P	M	0:00:44.422-0:00:44.688	BL	0.485164	8	1.81755
Trial 1	M1-2	C-P	M	0:00:44.688-0:00:44.954	BL	0.152828	8	0.572537
Trial 1	M1-2	C-P	M	0:00:44.954-0:00:45.220	BL	0.421671	8	1.57967
Trial 1	M1-2	C-P	M	0:00:45.220-0:00:45.486	BL	0.185234	8	0.693931
Trial 1	M1-2	C-P	M	0:00:45.486-0:00:45.752	BL	0.158831	8	0.595019
Trial 1	M1-2	C-P	M	0:00:45.752-0:00:46.018	BL	0.0607192	8	0.227467
Trial 1	M1-2	C-P	M	0:00:46.018-0:00:46.284	BL	0.175493	8	0.657446
Trial 1	M1-2	C-P	M	0:00:46.284-0:00:46.550	BL	0.0655366	8	0.245518
Trial 1	M1-2	C-P	M	0:00:46.550-0:00:46.816	BL	0.0559192	8	0.209487
Trial 1	M1-2	C-P	M	0:00:46.816-0:00:47.082	BL	0.0984966	8	0.368996
Trial 1	M1-2	C-P	M	0:00:47.082-0:00:47.348	BL	0.0367336	8	0.137613
Trial 1	M1-2	C-P	M	0:00:47.348-0:00:47.614	BL	0.0572581	7	0.245147
Trial 1	M1-2	C-P	M	0:00:47.614-0:00:47.880	BL	0.0904345	8	0.338793
Trial 1	M1-2	C-P	M	0:00:47.880-0:00:48.146	BL	0.0478017	8	0.179076
Trial 1	M1-2	C-P	M	0:00:48.146-0:00:48.412	BL	0.0374045	8	0.140126
Trial 1	M1-2	C-P	M	0:00:48.412-0:00:48.678	BL	0.0722007	8	0.270483
Trial 1	M1-2	C-P	M	0:00:48.678-0:00:48.944	BL	0.0282675	8	0.105897
Trial 1	M1-2	C-P	M	0:00:48.944-0:00:49.210	BL	0.0698378	8	0.261629
Trial 1	M1-2	C-P	M	0:00:49.210-0:00:49.476	BL	0.0816604	8	0.30592
Trial 1	M1-2	C-P	M	0:00:49.476-0:00:49.742	BL	0.0579255	8	0.217004
Trial 1	M1-2	C-P	M	0:00:49.742-0:00:50.008	BL	0.0691103	8	0.258908
Trial 1	M1-2	C-P	M	0:00:50.008-0:00:50.274	BL	0.0576662	8	0.216031
Trial 1	M1-2	C-P	M	0:00:50.274-0:00:50.540	BL	0.0314188	8	0.117703
Trial 1	M1-2	C-P	M	0:00:50.540-0:00:50.806	BL	0.0543684	8	0.203677
Trial 1	M1-2	C-P	M	0:00:50.806-0:00:51.072	BL	0.0590839	8	0.221341
Trial 1	M1-2	C-P	M	0:00:51.072-0:00:51.338	BL	0.0941392	8	0.352666
Trial 1	M1-2	C-P	M	0:00:51.338-0:00:51.604	BL	0.0138372	8	0.0518376
Trial 1	M1-2	C-P	M	0:00:51.604-0:00:51.870	BL	0.107635	8	0.403226
Trial 1	M1-2	C-P	M	0:00:51.870-0:00:52.136	BL	0.0267696	8	0.100285
Trial 1	M1-2	C-P	M	0:00:52.136-0:00:52.402	BL	0.0932794	8	0.349448
Trial 1	M1-2	C-P	M	0:00:52.402-0:00:52.668	BL	0.0291751	8	0.109297
Trial 1	M1-2	C-P	M	0:00:52.668-0:00:52.934	BL	0.049941	8	0.187092
Trial 1	M1-2	C-P	M	0:00:52.934-0:00:53.200	BL	0.0509983	8	0.191053
Trial 1	M1-2	C-P	M	0:00:53.200-0:00:53.466	BL	0.0497239	8	0.186276
Trial 1	M1-2	C-P	M	0:00:53.466-0:00:53.732	BL	0.0260626	8	0.0976371
Trial 1	M1-2	C-P	M	0:00:53.732-0:00:53.998	BL	0.0539311	8	0.202039
Trial 1	M1-2	C-P	M	0:00:53.998-0:00:54.264	BL	0.0791255	8	0.296424
Trial 1	M1-2	C-P	M	0:00:54.264-0:00:54.530	BL	0.0591342	8	0.221531
Trial 1	M1-2	C-P	M	0:00:54.530-0:00:54.796	BL	0.0464328	8	0.173948
Trial 1	M1-2	C-P	M	0:00:54.796-0:00:55.062	BL	0.124248	8	0.46546
Trial 1	M1-2	C-P	M	0:00:55.062-0:00:55.328	BL	0.137123	8	0.513699
Trial 1	M1-2	C-P	M	0:00:55.328-0:00:55.594	BL	0.0332834	8	0.124688
Trial 1	M1-2	C-P	M	0:00:55.594-0:00:55.860	BL	0.070342	8	0.263519
Trial 1	M1-2	C-P	M	0:00:55.860-0:00:56.126	BL	0.0469745	8	0.175977
Trial 1	M1-2	C-P	M	0:00:56.126-0:00:56.392	BL	0.0746229	8	0.279557
Trial 1	M1-2	C-P	M	0:00:56.392-0:00:56.658	BL	0.0722444	8	0.270645
Trial 1	M1-2	C-P	M	0:00:56.658-0:00:56.924	BL	0.038633	8	0.144728
Trial 1	M1-2	C-P	M	0:00:56.924-0:00:57.190	BL	0.0781623	7	0.334648
Trial 1	M1-2	C-P	M	0:00:57.190-0:00:57.456	BL	0.11796	8	0.441907
Trial 1	M1-2	C-P	M	0:00:57.456-0:00:57.722	BL	0.0854281	8	0.320033
Trial 1	M1-2	C-P	M	0:00:57.722-0:00:57.988	BL	0.066878	8	0.250543
Trial 1	M1-2	C-P	M	0:00:57.988-0:00:58.254	BL	0.0673414	8	0.252276
Trial 1	M1-2	C-P	M	0:00:58.254-0:00:58.520	BL	0.127626	8	0.478117
Trial 1	M1-2	C-P	M	0:00:58.520-0:00:58.786	BL	0.0547295	8	0.205029
Trial 1	M1-2	C-P	M	0:00:58.786-0:00:59.052	BL	0.0718434	8	0.269145
Trial 1	M1-2	C-P	M	0:00:59.052-0:00:59.318	BL	0.0169313	8	0.0634288
Trial 1	M1-2	C-P	M	0:00:59.318-0:00:59.584	BL	0.0741801	8	0.277895
Trial 1	M1-2	C-P	M	0:00:59.584-0:00:59.850	BL	0.0285175	8	0.106834
Trial 1	M1-2	C-P	M	0:00:59.850-0:01:00.116	BL	0.0327092	8	0.122538
Trial 1	M1-2	C-P	M	0:01:00.116-0:01:00.382	BL	0.0215681	8	0.080799
Trial 1	M1-2	C-P	M	0:01:00.382-0:01:00.648	BL	0.0191086	8	0.0715851
Trial 1	M1-2	C-P	M	0:01:00.648-0:01:00.914	BL	0.105373	8	0.394753
Trial 1	M1-2	C-P	M	0:01:00.914-0:01:01.180	BL	0.0174044	8	0.0652014
Trial 1	M1-2	C-P	M	0:01:01.180-0:01:01.446	BL	0.0787355	8	0.294961
Trial 1	M1-2	C-P	M	0:01:01.446-0:01:01.712	BL	0.071426	8	0.267581
Trial 1	M1-2	C-P	M	0:01:01.712-0:01:01.978	BL	0.0497752	8	0.186471
Trial 1	M1-2	C-P	M	0:01:01.978-0:01:02.244	BL	0.0451094	8	0.168992
Trial 1	M1-2	C-P	M	0:01:02.244-0:01:02.510	BL	0.077853	8	0.291655
Trial 1	M1-2	C-P	M	0:01:02.510-0:01:02.776	BL	0.0857104	8	0.321094
Trial 1	M1-2	C-P	M	0:01:02.776-0:01:03.042	BL	0.0368496	8	0.138046
Trial 1	M1-2	C-P	M	0:01:03.042-0:01:03.308	BL	0.0807891	8	0.302654
Trial 1	M1-2	C-P	M	0:01:03.308-0:01:03.574	BL	0.0386865	8	0.144929
Trial 1	M1-2	C-P	M	0:01:03.574-0:01:03.840	BL	0.043777	8	0.163999
Trial 1	M1-2	C-P	M	0:01:03.840-0:01:04.106	BL	0.0227842	8	0.0853546
Trial 1	M1-2	C-P	M	0:01:04.106-0:01:04.372	BL	0.0753565	8	0.282302
Trial 1	M1-2	C-P	M	0:01:04.372-0:01:04.638	BL	0.114669	8	0.429575
Trial 1	M1-2	C-P	M	0:01:04.638-0:01:04.904	BL	0.0796363	8	0.298338
Trial 1	M1-2	C-P	M	0:01:04.904-0:01:05.170	BL	0.052932	8	0.198295
Trial 1	M1-2	C-P	M	0:01:05.170-0:01:05.436	BL	0.026975	8	0.101056
Trial 1	M1-2	C-P	M	0:01:05.436-0:01:05.702	BL	0.120425	8	0.45114
Trial 1	M1-2	C-P	M	0:01:05.702-0:01:05.968	BL	0.0390286	8	0.146211
Trial 1	M1-2	C-P	M	0:01:05.968-0:01:06.234	BL	0.085747	8	0.321228
Trial 1	M1-2	C-P	M	0:01:06.234-0:01:06.500	BL	0.0457549	8	0.17141
Trial 1	M1-2	C-P	M	0:01:06.500-0:01:06.766	BL	0.0497862	7	0.213156
Trial 1	M1-2	C-P	M	0:01:06.766-0:01:07.032	BL	0.0267522	8	0.100221
Trial 1	M1-2	C-P	M	0:01:07.032-0:01:07.298	BL	0.0375853	8	0.140803
Trial 1	M1-2	C-P	M	0:01:07.298-0:01:07.564	BL	0.0775547	8	0.290539
Trial 1	M1-2	C-P	M	0:01:07.564-0:01:07.830	BL	0.0148054	8	0.0554655
Trial 1	M1-2	C-P	M	0:01:07.830-0:01:08.096	BL	0.079659	8	0.298423
Trial 1	M1-2	C-P	M	0:01:08.096-0:01:08.362	BL	0.063008	8	0.236046
Trial 1	M1-2	C-P	M	0:01:08.362-0:01:08.628	BL	0.0941203	8	0.352598
Trial 1	M1-2	C-P	M	0:01:08.628-0:01:08.894	BL	0.0301897	8	0.113098
Trial 1	M1-2	C-P	M	0:01:08.894-0:01:09.160	BL	0.0893591	8	0.334761
Trial 1	M1-2	C-P	M	0:01:09.160-0:01:09.426	BL	0.102895	8	0.385472
Trial 1	M1-2	C-P	M	0:01:09.426-0:01:09.692	BL	0.0920857	8	0.344974
Trial 1	M1-2	C-P	M	0:01:09.692-0:01:09.958	BL	0.0323286	8	0.12111
Trial 1	M1-2	C-P	M	0:01:09.958-0:01:10.224	BL	0.0289863	8	0.108589
Trial 1	M1-2	C-P	M	0:01:10.224-0:01:10.490	BL	0.0821222	8	0.307649
Trial 1	M1-2	C-P	M	0:01:10.490-0:01:10.756	BL	0.0563303	8	0.211028
Trial 1	M1-2	C-P	M	0:01:10.756-0:01:11.022	BL	0.0586263	8	0.219631
Trial 1	M1-2	C-P	M	0:01:11.022-0:01:11.288	BL	0.0207284	8	0.0776532
Trial 1	M1-2	C-P	M	0:01:11.288-0:01:11.554	BL	0.109597	8	0.410581
Trial 1	M1-2	C-P	M	0:01:11.554-0:01:11.820	BL	0.131448	8	0.492435
Trial 1	M1-2	C-P	M	0:01:11.820-0:01:12.086	BL	0.104262	8	0.390588
Trial 1	M1-2	C-P	M	0:01:12.086-0:01:12.352	BL	0.0237957	8	0.0891458
Trial 1	M1-2	C-P	M	0:01:12.352-0:01:12.618	BL	0.0219633	8	0.0822794
Trial 1	M1-2	C-P	M	0:01:12.618-0:01:12.884	BL	0.0828685	8	0.310445
Trial 1	M1-2	C-P	M	0:01:12.884-0:01:13.150	BL	0.0425616	8	0.159445
Trial 1	M1-2	C-P	M	0:01:13.150-0:01:13.416	BL	0.0585945	8	0.21951
Trial 1	M1-2	C-P	M	0:01:13.416-0:01:13.682	BL	0.0613474	8	0.229824
Trial 1	M1-2	C-P	M	0:01:13.682-0:01:13.948	BL	0.030369	8	0.11377
Trial 1	M1-2	C-P	M	0:01:13.948-0:01:14.214	BL	0.0940713	8	0.352416
Trial 1	M1-2	C-P	M	0:01:14.214-0:01:14.480	BL	0.0618232	8	0.231605
Trial 1	M1-2	C-P	M	0:01:14.480-0:01:14.746	BL	0.0582717	8	0.2183
Trial 1	M1-2	C-P	M	0:01:14.746-0:01:15.012	BL	0.0202244	8	0.0757663
Trial 1	M1-2	C-P	M	0:01:15.012-0:01:15.278	BL	0.0762769	8	0.28575
Trial 1	M1-2	C-P	M	0:01:15.278-0:01:15.544	BL	0.0115668	8	0.0433326
Trial 1	M1-2	C-P	M	0:01:15.544-0:01:15.810	BL	0.100676	8	0.37716
Trial 1	M1-2	C-P	M	0:01:15.810-0:01:16.076	BL	0.032104	7	0.137451
Trial 1	M1-2	C-P	M	0:01:16.076-0:01:16.342	BL	0.0279594	8	0.104742
Trial 1	M1-2	C-P	M	0:01:16.342-0:01:16.608	BL	0.0312411	8	0.117036
Trial 1	M1-2	C-P	M	0:01:16.608-0:01:16.874	BL	0.0261115	8	0.0978205
Trial 1	M1-2	C-P	M	0:01:16.874-0:01:17.140	BL	0.0601555	8	0.225357
Trial 1	M1-2	C-P	M	0:01:17.140-0:01:17.406	BL	0.0183763	8	0.0688421
Trial 1	M1-2	C-P	M	0:01:17.406-0:01:17.672	BL	0.0826695	8	0.309699
Trial 1	M1-2	C-P	M	0:01:17.672-0:01:17.938	BL	0.0404863	8	0.151672
Trial 1	M1-2	C-P	M	0:01:17.938-0:01:18.204	BL	0.0669171	8	0.250687
Trial 1	M1-2	C-P	M	0:01:18.204-0:01:18.470	BL	0.108034	8	0.404725
Trial 1	M1-2	C-P	M	0:01:18.470-0:01:18.736	BL	0.0463798	8	0.173751
Trial 1	M1-2	C-P	M	0:01:18.736-0:01:19.002	BL	0.113195	8	0.424058
Trial 1	M1-2	C-P	M	0:01:19.002-0:01:19.268	BL	0.0205937	8	0.0771497
Trial 1	M1-2	C-P	M	0:01:19.268-0:01:19.534	BL	0.10939	8	0.409801
Trial 1	M1-2	C-P	M	0:01:19.534-0:01:19.800	BL	0.101001	8	0.37838
Trial 1	M1-2	C-P	M	0:01:19.800-0:01:20.066	BL	0.0812864	8	0.304521
Trial 1	M1-2	C-P	M	0:01:20.066-0:01:20.332	BL	0.0709797	8	0.265908
Trial 1	M1-2	C-P	M	0:01:20.332-0:01:20.598	BL	0.0781458	8	0.292752
Trial 1	M1-2	C-P	M	0:01:20.598-0:01:20.864	BL	0.0566956	8	0.212395
Trial 1	M1-2	C-P	M	0:01:20.864-0:01:21.130	BL	0.0702839	8	0.2633
Trial 1	M1-2	C-P	M	0:01:21.130-0:01:21.396	BL	0.100222	8	0.375454
Trial 1	M1-2	C-P	M	0:01:21.396-0:01:21.662	BL	0.0605284	8	0.226753
Trial 1	M1-2	C-P	M	0:01:21.662-0:01:21.928	BL	0.101484	8	0.380183
Trial 1	M1-2	C-P	M	0:01:21.928-0:01:22.194	BL	0.152543	8	0.571461
Trial 1	M1-2	C-P	M	0:01:22.194-0:01:22.460	BL	0.21855	8	0.818744
Trial 1	M1-2	C-P	M	0:01:22.460-0:01:22.726	BL	0.465937	8	1.74551
Trial 1	M1-2	C-P	M	0:01:22.726-0:01:22.992	BL	1.13734	8	4.2608
Trial 1	M1-2	C-P	M	0:01:22.992-0:01:23.258	BL	0.517449	8	1.93849
Trial 1	M1-2	C-P	M	0:01:23.258-0:01:23.524	BL	0.25055	8	0.938618
Trial 1	M1-2	C-P	M	0:01:23.524-0:01:23.790	BL	0.57053	8	2.13735
Trial 1	M1-2	C-P	M	0:01:23.790-0:01:24.056	BL	0.393145	8	1.47281
Trial 1	M1-2	C-P	M	0:01:24.056-0:01:24.322	BL	0.244014	8	0.914139
Trial 1	M1-2	C-P	M	0:01:24.322-0:01:24.588	BL	0.201755	8	0.755825
Trial 1	M1-2	C-P	M	0:01:24.588-0:01:24.854	BL	0.202827	8	0.759844
Trial 1	M1-2	C-P	M	0:01:24.854-0:01:25.120	BL	0.306359	8	1.1477
Trial 1	M1-2	C-P	M	0:01:25.120-0:01:25.386	BL	0.317917	8	1.19099
Trial 1	M1-2	C-P	M	0:01:25.386-0:01:25.652	BL	0.149392	7	0.639609
Trial 1	M1-2	C-P	M	0:01:25.652-0:01:25.918	BL	0.176894	8	0.66269
Trial 1	M1-2	C-P	M	0:01:25.918-0:01:26.184	BL	0.167302	8	0.626752
Trial 1	M1-2	C-P	M	0:01:26.184-0:01:26.450	BL	0.139212	8	0.521519
Trial 1	M1-2	C-P	M	0:01:26.450-0:01:26.716	BL	0.0640559	8	0.23997
Trial 1	M1-2	C-P	M	0:01:26.716-0:01:26.982	BL	0.0549729	8	0.205943
Trial 1	M1-2	C-P	M	0:01:26.982-0:01:27.248	BL	0.0625581	8	0.234359
Trial 1	M1-2	C-P	M	0:01:27.248-0:01:27.514	BL	0.0365975	8	0.137103
Trial 1	M1-2	C-P	M	0:01:27.514-0:01:27.780	BL	0.0729577	8	0.273318
Trial 1	M1-2	C-P	M	0:01:27.780-0:01:28.046	BL	0.0822097	8	0.30798
Trial 1	M1-2	C-P	M	0:01:28.046-0:01:28.312	BL	0.163728	8	0.613367
Trial 1	M1-2	C-P	M	0:01:28.312-0:01:28.578	BL	0.0472332	8	0.176946
Trial 1	M1-2	C-P	M	0:01:28.578-0:01:28.844	BL	0.0111629	8	0.0418193
Trial 1	M1-2	C-P	M	0:01:28.844-0:01:29.110	BL	0.08034	8	0.300972
Trial 1	M1-2	C-P	M	0:01:29.110-0:01:29.376	BL	0.0263882	8	0.0988575
Trial 1	M1-2	C-P	M	0:01:29.376-0:01:29.642	BL	0.049476	8	0.185349
Trial 1	M1-2	C-P	M	0:01:29.642-0:01:29.908	BL	0.0481673	8	0.180448
Trial 1	M1-2	C-P	M	0:01:29.908-0:01:30.174	BL	0.10334	8	0.387136
Trial 1	M1-2	C-P	M	0:01:30.174-0:01:30.440	BL	0.0699663	8	0.262111
Trial 1	M1-2	C-P	M	0:01:30.440-0:01:30.706	BL	0.0874246	8	0.327515
Trial 1	M1-2	C-P	M	0:01:30.706-0:01:30.972	BL	0.0474377	8	0.177712
Trial 1	M1-2	C-P	M	0:01:30.972-0:01:31.238	BL	0.0621961	8	0.233002
Trial 1	M1-2	C-P	M	0:01:31.238-0:01:31.504	BL	0.0478097	8	0.179107
Trial 1	M1-2	C-P	M	0:01:31.504-0:01:31.770	BL	0.0505981	8	0.189553
Trial 1	M1-2	C-P	M	0:01:31.770-0:01:32.036	BL	0.0957347	8	0.358647
Trial 1	M1-2	C-P	M	0:01:32.036-0:01:32.302	BL	0.0341329	8	0.12787
Trial 1	M1-2	C-P	M	0:01:32.302-0:01:32.568	BL	0.0944837	8	0.353961
Trial 1	M1-2	C-P	M	0:01:32.568-0:01:32.834	BL	0.0484497	8	0.181504
Trial 1	M1-2	C-P	M	0:01:32.834-0:01:33.100	BL	0.074114	8	0.277648
Trial 1	M1-2	C-P	M	0:01:33.100-0:01:33.366	BL	0.0589198	8	0.220728
Trial 1	M1-2	C-P	M	0:01:33.366-0:01:33.632	BL	0.0212094	8	0.0794562
Trial 1	M1-2	C-P	M	0:01:33.632-0:01:33.898	BL	0.0641781	8	0.240427
Trial 1	M1-2	C-P	M	0:01:33.898-0:01:34.164	BL	0.0759252	8	0.284434
Trial 1	M1-2	C-P	M	0:01:34.164-0:01:34.430	BL	0.0736471	8	0.275899
Trial 1	M1-2	C-P	M	0:01:34.430-0:01:34.696	BL	0.0428995	8	0.160714
Trial 1	M1-2	C-P	M	0:01:34.696-0:01:34.962	BL	0.0740804	8	0.277525
Trial 1	M1-2	C-P	M	0:01:34.962-0:01:35.228	BL	0.0750934	7	0.321505
Trial 1	M1-2	C-P	M	0:01:35.228-0:01:35.494	BL	0.0249131	8	0.0933314
Trial 1	M1-2	C-P	M	0:01:35.494-0:01:35.760	BL	0.0291262	8	0.109113
Trial 1	M1-2	C-P	M	0:01:35.760-0:01:36.026	BL	0.0356977	8	0.133733
Trial 1	M1-2	C-P	M	0:01:36.026-0:01:36.292	BL	0.0429487	8	0.160895
Trial 1	M1-2	C-P	M	0:01:36.292-0:01:36.558	BL	0.0367664	8	0.137737
Trial 1	M1-2	C-P	M	0:01:36.558-0:01:36.824	BL	0.0807155	8	0.30238
Trial 1	M1-2	C-P	M	0:01:36.824-0:01:37.090	BL	0.0242127	8	0.0907073
Trial 1	M1-2	C-P	M	0:01:37.090-0:01:37.356	BL	0.110219	8	0.412909
Trial 1	M1-2	C-P	M	0:01:37.356-0:01:37.622	BL	0.0802416	8	0.300607
Trial 1	M1-2	C-P	M	0:01:37.622-0:01:37.888	BL	0.0314039	8	0.117648
Trial 1	M1-2	C-P	M	0:01:37.888-0:01:38.154	BL	0.0800644	8	0.299943
Trial 1	M1-2	C-P	M	0:01:38.154-0:01:38.420	BL	0.0418187	8	0.156662
Trial 1	M1-2	C-P	M	0:01:38.420-0:01:38.686	BL	0.113279	8	0.424375
Trial 1	M1-2	C-P	M	0:01:38.686-0:01:38.952	BL	0.0332288	8	0.124483
Trial 1	M1-2	C-P	M	0:01:38.952-0:01:39.218	BL	0.0660004	8	0.247254
Trial 1	M1-2	C-P	M	0:01:39.218-0:01:39.484	BL	0.0278647	8	0.104389
Trial 1	M1-2	C-P	M	0:01:39.484-0:01:39.750	BL	0.0341996	8	0.12812
Trial 1	M1-2	C-P	M	0:01:39.750-0:01:40.016	BL	0.0157107	8	0.0588563
Trial 1	M1-2	C-P	M	0:01:40.016-0:01:40.282	BL	0.0265632	8	0.0995119
Trial 1	M1-2	C-P	M	0:01:40.282-0:01:40.548	BL	0.0359829	8	0.134801
Trial 1	M1-2	C-P	M	0:01:40.548-0:01:40.814	BL	0.0282874	8	0.105971
Trial 1	M1-2	C-P	M	0:01:40.814-0:01:41.080	BL	0.0539609	8	0.202152
Trial 1	M1-2	C-P	M	0:01:41.080-0:01:41.346	BL	0.0245843	8	0.0921
Trial 1	M1-2	C-P	M	0:01:41.346-0:01:41.612	BL	0.062192	8	0.232985
Trial 1	M1-2	C-P	M	0:01:41.612-0:01:41.878	BL	0.0551025	8	0.206427
Trial 1	M1-2	C-P	M	0:01:41.878-0:01:42.144	BL	0.107211	8	0.40164
Trial 1	M1-2	C-P	M	0:01:42.144-0:01:42.410	BL	0.0288798	8	0.108191
Trial 1	M1-2	C-P	M	0:01:42.410-0:01:42.676	BL	0.0197383	8	0.0739453
Trial 1	M1-2	C-P	M	0:01:42.676-0:01:42.942	BL	0.0906617	8	0.339642
Trial 1	M1-2	C-P	M	0:01:42.942-0:01:43.208	BL	0.0477105	8	0.178734
Trial 1	M1-2	C-P	M	0:01:43.208-0:01:43.474	BL	0.0949936	8	0.355869
Trial 1	M1-2	C-P	M	0:01:43.474-0:01:43.740	BL	0.0525746	8	0.196957
Trial 1	M1-2	C-P	M	0:01:43.740-0:01:44.006	BL	0.0429334	8	0.160841
Trial 1	M1-2	C-P	M	0:01:44.006-0:01:44.272	BL	0.053173	8	0.199199
Trial 1	M1-2	C-P	M	0:01:44.272-0:01:44.538	BL	0.117487	8	0.440133
Trial 1	M1-2	C-P	M	0:01:44.538-0:01:44.804	BL	0.0169417	7	0.0725347
Trial 1	M1-2	C-P	M	0:01:44.804-0:01:45.070	BL	0.0273725	8	0.102543
Trial 1	M1-2	C-P	M	0:01:45.070-0:01:45.336	BL	0.0419744	8	0.157245
Trial 1	M1-2	C-P	M	0:01:45.336-0:01:45.602	BL	0.0683801	8	0.25617
Trial 1	M1-2	C-P	M	0:01:45.602-0:01:45.868	BL	0.121416	8	0.454849
Trial 1	M1-2	C-P	M	0:01:45.868-0:01:46.134	BL	0.0523441	8	0.196093
Trial 1	M1-2	C-P	M	0:01:46.134-0:01:46.400	BL	0.125736	8	0.471037
Trial 1	M1-2	C-P	M	0:01:46.400-0:01:46.666	BL	0.0375223	8	0.140567
Trial 1	M1-2	C-P	M	0:01:46.666-0:01:46.932	BL	0.053466	8	0.200298
Trial 1	M1-2	C-P	M	0:01:46.932-0:01:47.198	BL	0.0417567	8	0.156431
Trial 1	M1-2	C-P	M	0:01:47.198-0:01:47.464	BL	0.033122	8	0.124083
Trial 1	M1-2	C-P	M	0:01:47.464-0:01:47.730	BL	0.03393	8	0.127111
Trial 1	M1-2	C-P	M	0:01:47.730-0:01:47.996	BL	0.0213763	8	0.0800805
Trial 1	M1-2	C-P	M	0:01:47.996-0:01:48.262	BL	0.0862116	8	0.32297
Trial 1	M1-2	C-P	M	0:01:48.262-0:01:48.528	BL	0.0852797	8	0.319481
Trial 1	M1-2	C-P	M	0:01:48.528-0:01:48.794	BL	0.0936579	8	0.350863
Trial 1	M1-2	C-P	M	0:01:48.794-0:01:49.060	BL	0.0678021	8	0.254005
Trial 1	M1-2	C-P	M	0:01:49.060-0:01:49.326	BL	0.0590471	8	0.221203
Trial 1	M1-2	C-P	M	0:01:49.326-0:01:49.592	BL	0.060418	8	0.226342
Trial 1	M1-2	C-P	M	0:01:49.592-0:01:49.858	BL	0.0272828	8	0.102207
Trial 1	M1-2	C-P	M	0:01:49.858-0:01:50.124	BL	0.0832299	8	0.311803
Trial 1	M1-2	C-P	M	0:01:50.124-0:01:50.390	BL	0.0358354	8	0.134249
Trial 1	M1-2	C-P	M	0:01:50.390-0:01:50.656	BL	0.0792487	8	0.296885
Trial 1	M1-2	C-P	M	0:01:50.656-0:01:50.922	BL	0.0524444	8	0.196468
Trial 1	M1-2	C-P	M	0:01:50.922-0:01:51.188	BL	0.137632	8	0.515602
Trial 1	M1-2	C-P	M	0:01:51.188-0:01:51.454	BL	0.0199938	8	0.0749013
Trial 1	M1-2	C-P	M	0:01:51.454-0:01:51.720	BL	0.0610306	8	0.228634
Trial 1	M1-2	C-P	M	0:01:51.720-0:01:51.986	BL	0.135309	8	0.506896
Trial 1	M1-2	C-P	M	0:01:51.986-0:01:52.252	BL	0.0970707	8	0.36365
Trial 1	M1-2	C-P	M	0:01:52.252-0:01:52.518	BL	0.0741374	8	0.277737
Trial 1	M1-2	C-P	M	0:01:52.518-0:01:52.784	BL	0.0987522	8	0.369949
Trial 1	M1-2	C-P	M	0:01:52.784-0:01:53.050	BL	0.167772	8	0.628516
Trial 1	M1-2	C-P	M	0:01:53.050-0:01:53.316	BL	0.0306135	8	0.114686
Trial 1	M1-2	C-P	M	0:01:53.316-0:01:53.582	BL	0.0762221	8	0.285546
Trial 1	M1-2	C-P	M	0:01:53.582-0:01:53.848	BL	0.0970778	8	0.363678
Trial 1	M1-2	C-P	M	0:01:53.848-0:01:54.114	BL	0.0558792	7	0.239243
Trial 1	M1-2	C-P	M	0:01:54.114-0:01:54.380	BL	0.058954	8	0.220855
Trial 1	M1-2	C-P	M	0:01:54.380-0:01:54.646	BL	0.0645691	8	0.241892
Trial 1	M1-2	C-P	M	0:01:54.646-0:01:54.912	BL	0.049931	8	0.187054
Trial 1	M1-2	C-P	M	0:01:54.912-0:01:55.178	BL	0.0386333	8	0.144729
Trial 1	M1-2	C-P	M	0:01:55.178-0:01:55.444	BL	0.072494	8	0.271581
Trial 1	M1-2	C-P	M	0:01:55.444-0:01:55.710	BL	0.0551489	8	0.206602
Trial 1	M1-2	C-P	M	0:01:55.710-0:01:55.976	BL	0.0469609	8	0.175929
Trial 1	M1-2	C-P	M	0:01:55.976-0:01:56.242	BL	0.049487	8	0.185392
Trial 1	M1-2	C-P	M	0:01:56.242-0:01:56.508	BL	0.0235801	8	0.0883362
Trial 1	M1-2	C-P	M	0:01:56.508-0:01:56.774	BL	0.0647988	8	0.242752
Trial 1	M1-2	C-P	M	0:01:56.774-0:01:57.040	BL	0.0709303	8	0.265721
Trial 1	M1-2	C-P	M	0:01:57.040-0:01:57.306	BL	0.0862195	8	0.323001
Trial 1	M1-2	C-P	M	0:01:57.306-0:01:57.572	BL	0.0231646	8	0.0867795
Trial 1	M1-2	C-P	M	0:01:57.572-0:01:57.838	BL	0.0523742	8	0.196206
Trial 1	M1-2	C-P	M	0:01:57.838-0:01:58.104	BL	0.0777523	8	0.291281
Trial 1	M1-2	C-P	M	0:01:58.104-0:01:58.370	BL	0.0498554	8	0.186769
Trial 1	M1-2	C-P	M	0:01:58.370-0:01:58.636	BL	0.0929207	8	0.348103
Trial 1	M1-2	C-P	M	0:01:58.636-0:01:58.902	BL	0.0700515	8	0.262431
Trial 1	M1-2	C-P	M	0:01:58.902-0:01:59.168	BL	0.124951	8	0.4681
Trial 1	M1-2	C-P	M	0:01:59.168-0:01:59.434	BL	0.0599526	8	0.224598
Trial 1	M1-2	C-P	M	0:01:59.434-0:01:59.700	BL	0.0927133	8	0.347327
Trial 1	M1-2	C-P	M	0:01:59.700-0:01:59.966	BL	0.0722307	8	0.270594
Trial 1	M1-2	C-P	M	0:01:59.966-0:02:00.232	BL	0.0898776	8	0.336705
Trial 1	M1-2	C-P	M	0:02:00.232-0:02:00.498	BL	0.0354023	8	0.132628
Trial 1	M1-2	C-P	M	0:02:00.498-0:02:00.764	BL	0.0462086	8	0.173108
Trial 1	M1-2	C-P	M	0:02:00.764-0:02:01.030	BL	0.0767841	8	0.287654
Trial 1	M1-2	C-P	M	0:02:01.030-0:02:01.296	BL	0.0338722	8	0.126894
Trial 1	M1-2	C-P	M	0:02:01.296-0:02:01.562	BL	0.107363	8	0.402208
Trial 1	M1-2	C-P	M	0:02:01.562-0:02:01.828	BL	0.110361	8	0.41344
Trial 1	M1-2	C-P	M	0:02:01.828-0:02:02.094	BL	0.163258	8	0.611606
Trial 1	M1-2	C-P	M	0:02:02.094-0:02:02.360	BL	0.106934	8	0.400604
Trial 1	M1-2	C-P	M	0:02:02.360-0:02:02.626	BL	0.069396	8	0.259976
Trial 1	M1-2	C-P	M	0:02:02.626-0:02:02.892	BL	0.096747	8	0.362439
Trial 1	M1-2	C-P	M	0:02:02.892-0:02:03.158	BL	0.0567748	8	0.212692
Trial 1	M1-2	C-P	M	0:02:03.158-0:02:03.424	BL	0.0682166	8	0.255558
Trial 1	M1-2	C-P	M	0:02:03.424-0:02:03.690	BL	0.0343643	7	0.147127
Trial 1	M1-2	C-P	M	0:02:03.690-0:02:03.956	BL	0.0414935	8	0.155444
Trial 1	M1-2	C-P	M	0:02:03.956-0:02:04.222	BL	0.0634096	8	0.237548
Trial 1	M1-2	C-P	M	0:02:04.222-0:02:04.488	BL	0.105693	8	0.395949
Trial 1	M1-2	C-P	M	0:02:04.488-0:02:04.754	BL	0.0491698	8	0.184203
Trial 1	M1-2	C-P	M	0:02:04.754-0:02:05.020	BL	0.0749919	8	0.280941
Trial 1	M1-2	C-P	M	0:02:05.020-0:02:05.286	BL	0.0848502	8	0.317871
Trial 1	M1-2	C-P	M	0:02:05.286-0:02:05.552	BL	0.0603443	8	0.226063
Trial 1	M1-2	C-P	M	0:02:05.552-0:02:05.818	BL	0.0618172	8	0.231583
Trial 1	M1-2	C-P	M	0:02:05.818-0:02:06.084	BL	0.030532	8	0.114382
Trial 1	M1-2	C-P	M	0:02:06.084-0:02:06.350	BL	0.145621	8	0.54553
Trial 1	M1-2	C-P	M	0:02:06.350-0:02:06.616	BL	0.049549	8	0.185626
Trial 1	M1-2	C-P	M	0:02:06.616-0:02:06.882	BL	0.074974	8	0.280869
Trial 1	M1-2	C-P	M	0:02:06.882-0:02:07.148	BL	0.0317355	8	0.118889
Trial 1	M1-2	C-P	M	0:02:07.148-0:02:07.414	BL	0.0452607	8	0.169558
Trial 1	M1-2	C-P	M	0:02:07.414-0:02:07.680	BL	0.0204218	8	0.0765049
Trial 1	M1-2	C-P	M	0:02:07.680-0:02:07.946	BL	0.0779974	8	0.292202
Trial 1	M1-2	C-P	M	0:02:07.946-0:02:08.212	BL	0.0660952	8	0.247607
Trial 1	M1-2	C-P	M	0:02:08.212-0:02:08.478	BL	0.07801	8	0.292247
Trial 1	M1-2	C-P	M	0:02:08.478-0:02:08.744	BL	0.122704	8	0.459681
Trial 1	M1-2	C-P	M	0:02:08.744-0:02:09.010	BL	0.07812	8	0.292656
Trial 1	M1-2	C-P	M	0:02:09.010-0:02:09.276	BL	0.107429	8	0.402456
Trial 1	M1-2	C-P	M	0:02:09.276-0:02:09.542	BL	0.0514954	8	0.192915
Trial 1	M1-2	C-P	M	0:02:09.542-0:02:09.808	BL	0.0929129	8	0.348075
Trial 1	M1-2	C-P	M	0:02:09.808-0:02:10.074	BL	0.0571092	8	0.213945
Trial 1	M1-2	C-P	M	0:02:10.074-0:02:10.340	BL	0.0581941	8	0.218009
Trial 1	M1-2	C-P	M	0:02:10.340-0:02:10.606	BL	0.0514732	8	0.192832
Trial 1	M1-2	C-P	M	0:02:10.606-0:02:10.872	BL	0.0496639	8	0.186052
Trial 1	M1-2	C-P	M	0:02:10.872-0:02:11.138	BL	0.0819912	8	0.307161
Trial 1	M1-2	C-P	M	0:02:11.138-0:02:11.404	BL	0.0353205	8	0.132319
Trial 1	M1-2	C-P	M	0:02:11.404-0:02:11.670	BL	0.127747	8	0.478571
Trial 1	M1-2	C-P	M	0:02:11.670-0:02:11.936	BL	0.071101	8	0.266363
Trial 1	M1-2	C-P	M	0:02:11.936-0:02:12.202	BL	0.130635	8	0.489394
Trial 1	M1-2	C-P	M	0:02:12.202-0:02:12.468	BL	0.0799858	8	0.299649
Trial 1	M1-2	C-P	M	0:02:12.468-0:02:12.734	BL	0.0506589	8	0.18978
Trial 1	M1-2	C-P	M	0:02:12.734-0:02:13.000	BL	0.128973	8	0.483161
Trial 1	M1-2	C-P	M	0:02:13.000-0:02:13.266	BL	0.0689634	7	0.295267
Trial 1	M1-2	C-P	M	0:02:13.266-0:02:13.532	BL	0.115191	8	0.43153
Trial 1	M1-2	C-P	M	0:02:13.532-0:02:13.798	BL	0.058594	8	0.219509
Trial 1	M1-2	C-P	M	0:02:13.798-0:02:14.064	BL	0.116889	8	0.437895
Trial 1	M1-2	C-P	M	0:02:14.064-0:02:14.330	BL	0.102369	8	0.383501
Trial 1	M1-2	C-P	M	0:02:14.330-0:02:14.596	BL	0.110472	8	0.413853
Trial 1	M1-2	C-P	M	0:02:14.596-0:02:14.862	BL	0.0905313	8	0.339152
Trial 1	M1-2	C-P	M	0:02:14.862-0:02:15.128	BL	0.0921727	8	0.345305
Trial 1	M1-2	C-P	M	0:02:15.128-0:02:15.394	BL	0.103695	8	0.388465
Trial 1	M1-2	C-P	M	0:02:15.394-0:02:15.660	BL	0.0200713	8	0.0751922
Trial 1	M1-2	C-P	M	0:02:15.660-0:02:15.926	BL	0.0625154	8	0.234196
Trial 1	M1-2	C-P	M	0:02:15.926-0:02:16.192	BL	0.185658	8	0.695519
Trial 1	M1-2	C-P	M	0:02:16.192-0:02:16.458	BL	0.113268	8	0.424331
Trial 1	M1-2	C-P	M	0:02:16.458-0:02:16.724	BL	0.0412818	8	0.154651
Trial 1	M1-2	C-P	M	0:02:16.724-0:02:16.990	BL	0.0885121	8	0.331592
Trial 1	M1-2	C-P	M	0:02:16.990-0:02:17.256	BL	0.134322	8	0.503202
Trial 1	M1-2	C-P	M	0:02:17.256-0:02:17.522	BL	0.0795739	8	0.298105
Trial 1	M1-2	C-P	M	0:02:17.522-0:02:17.788	BL	0.208196	8	0.779953
Trial 1	M1-2	C-P	M	0:02:17.788-0:02:18.054	BL	0.0765481	8	0.286771
Trial 1	M1-2	C-P	M	0:02:18.054-0:02:18.320	BL	0.139113	8	0.521147
Trial 1	M1-2	C-P	M	0:02:18.320-0:02:18.586	BL	0.0386834	8	0.144917
Trial 1	M1-2	C-P	M	0:02:18.586-0:02:18.852	BL	0.112014	8	0.419631
Trial 1	M1-2	C-P	M	0:02:18.852-0:02:19.118	BL	0.051442	8	0.192716
Trial 1	M1-2	C-P	M	0:02:19.118-0:02:19.384	BL	0.0481548	8	0.1804
Trial 1	M1-2	C-P	M	0:02:19.384-0:02:19.650	BL	0.0745259	8	0.279193
Trial 1	M1-2	C-P	M	0:02:19.650-0:02:19.916	BL	0.0471251	8	0.176542
Trial 1	M1-2	C-P	M	0:02:19.916-0:02:20.182	BL	0.0747486	8	0.28003
Trial 1	M1-2	C-P	M	0:02:20.182-0:02:20.448	BL	0.0494634	8	0.185301
Trial 1	M1-2	C-P	M	0:02:20.448-0:02:20.714	BL	0.118859	8	0.445276
Trial 1	M1-2	C-P	M	0:02:20.714-0:02:20.980	BL	0.0548496	8	0.205479
Trial 1	M1-2	C-P	M	0:02:20.980-0:02:21.246	BL	0.0706052	8	0.264503
Trial 1	M1-2	C-P	M	0:02:21.246-0:02:21.512	BL	0.0382543	8	0.143309
Trial 1	M1-2	C-P	M	0:02:21.512-0:02:21.778	BL	0.0580112	8	0.217326
Trial 1	M1-2	C-P	M	0:02:21.778-0:02:22.044	BL	0.0527294	8	0.197539
Trial 1	M1-2	C-P	M	0:02:22.044-0:02:22.310	BL	0.0665273	8	0.249228
Trial 1	M1-2	C-P	M	0:02:22.310-0:02:22.576	BL	0.127687	8	0.478346
Trial 1	M1-2	C-P	M	0:02:22.576-0:02:22.842	BL	0.100493	7	0.430251
Trial 1	M1-2	C-P	M	0:02:22.842-0:02:23.108	BL	0.101395	8	0.379855
Trial 1	M1-2	C-P	M	0:02:23.108-0:02:23.374	BL	0.0826691	8	0.309699
Trial 1	M1-2	C-P	M	0:02:23.374-0:02:23.640	BL	0.0978618	8	0.366616
Trial 1	M1-2	C-P	M	0:02:23.640-0:02:23.906	BL	0.0538465	8	0.201724
Trial 1	M1-2	C-P	M	0:02:23.906-0:02:24.172	BL	0.0724547	8	0.271432
Trial 1	M1-2	C-P	M	0:02:24.172-0:02:24.438	BL	0.0503089	8	0.18847
Trial 1	M1-2	C-P	M	0:02:24.438-0:02:24.704	BL	0.0914401	8	0.342559
Trial 1	M1-2	C-P	M	0:02:24.704-0:02:24.970	BL	0.0372363	8	0.139497
Trial 1	M1-2	C-P	M	0:02:24.970-0:02:25.236	BL	0.0377657	8	0.141479
Trial 1	M1-2	C-P	M	0:02:25.236-0:02:25.502	BL	0.104383	8	0.391044
Trial 1	M1-2	C-P	M	0:02:25.502-0:02:25.768	BL	0.068234	8	0.25562
Trial 1	M1-2	C-P	M	0:02:25.768-0:02:26.034	BL	0.0749371	8	0.280735
Trial 1	M1-2	C-P	M	0:02:26.034-0:02:26.300	BL	0.0536376	8	0.200942
Trial 1	M1-2	C-P	M	0:02:26.300-0:02:26.566	BL	0.0937696	8	0.351281
Trial 1	M1-2	C-P	M	0:02:26.566-0:02:26.832	BL	0.159544	8	0.597691
Trial 1	M1-2	C-P	M	0:02:26.832-0:02:27.098	BL	0.155457	8	0.582385
Trial 1	M1-2	C-P	M	0:02:27.098-0:02:27.364	BL	0.104032	8	0.389728
Trial 1	M1-2	C-P	M	0:02:27.364-0:02:27.630	BL	0.040819	8	0.152919
Trial 1	M1-2	C-P	M	0:02:27.630-0:02:27.896	BL	0.136943	8	0.513019
Trial 1	M1-2	C-P	M	0:02:27.896-0:02:28.162	BL	0.0707691	8	0.265117
Trial 1	M1-2	C-P	M	0:02:28.162-0:02:28.428	BL	0.116969	8	0.438193
Trial 1	M1-2	C-P	M	0:02:28.428-0:02:28.694	BL	0.131638	8	0.493149
Trial 1	M1-2	C-P	M	0:02:28.694-0:02:28.960	BL	0.242365	8	0.907965
Trial 1	M1-2	C-P	M	0:02:28.960-0:02:29.226	BL	0.0613877	8	0.229974
Trial 1	M1-2	C-P	M	0:02:29.226-0:02:29.492	BL	0.0425087	8	0.159249
Trial 1	M1-2	C-P	M	0:02:29.492-0:02:29.758	BL	0.0826277	8	0.309545
Trial 1	M1-2	C-P	M	0:02:29.758-0:02:30.024	BL	0.099023	8	0.370962
Trial 1	M1-2	C-P	M	0:02:30.024-0:02:30.290	BL	0.095244	8	0.356808
Trial 1	M1-2	C-P	M	0:02:30.290-0:02:30.556	BL	0.0399887	8	0.149808
Trial 1	M1-2	C-P	M	0:02:30.556-0:02:30.822	BL	0.079199	8	0.296697
Trial 1	M1-2	C-P	M	0:02:30.822-0:02:31.088	BL	0.0220017	8	0.0824242
Trial 1	M1-2	C-P	M	0:02:31.088-0:02:31.354	BL	0.0770499	8	0.288648
Trial 1	M1-2	C-P	M	0:02:31.354-0:02:31.620	BL	0.0216326	8	0.0810419
Trial 1	M1-2	C-P	M	0:02:31.620-0:02:31.886	BL	0.0185774	8	0.0695963
Trial 1	M1-2	C-P	M	0:02:31.886-0:02:32.152	BL	0.0774049	7	0.331404
Trial 1	M1-2	C-P	M	0:02:32.152-0:02:32.418	BL	0.150816	8	0.564998
Trial 1	M1-2	C-P	M	0:02:32.418-0:02:32.684	BL	0.193393	8	0.724499
Trial 1	M1-2	C-P	M	0:02:32.684-0:02:32.950	BL	0.163208	8	0.611421
Trial 1	M1-2	C-P	M	0:02:32.950-0:02:33.216	BL	0.193957	8	0.726613
Trial 1	M1-2	C-P	M	0:02:33.216-0:02:33.482	BL	0.260502	8	0.975903
Trial 1	M1-2	C-P	M	0:02:33.482-0:02:33.748	BL	0.207317	8	0.776663
Trial 1	M1-2	C-P	M	0:02:33.748-0:02:34.014	BL	0.161673	8	0.605666
Trial 1	M1-2	C-P	M	0:02:34.014-0:02:34.280	BL	0.0620816	8	0.232574
Trial 1	M1-2	C-P	M	0:02:34.280-0:02:34.546	BL	0.123377	8	0.462199
Trial 1	M1-2	C-P	M	0:02:34.546-0:02:34.812	BL	0.0729718	8	0.273369
Trial 1	M1-2	C-P	M	0:02:34.812-0:02:35.078	BL	0.130722	8	0.489722
Trial 1	M1-2	C-P	M	0:02:35.078-0:02:35.344	BL	0.0907127	8	0.339835
Trial 1	M1-2	C-P	M	0:02:35.344-0:02:35.610	BL	0.139833	8	0.523849
Trial 1	M1-2	C-P	M	0:02:35.610-0:02:35.876	BL	0.0755308	8	0.282959
Trial 1	M1-2	C-P	M	0:02:35.876-0:02:36.142	BL	0.134162	8	0.502604
Trial 1	M1-2	C-P	M	0:02:36.142-0:02:36.408	BL	0.0970381	8	0.363528
Trial 1	M1-2	C-P	M	0:02:36.408-0:02:36.674	BL	0.0908163	8	0.34022
Trial 1	M1-2	C-P	M	0:02:36.674-0:02:36.940	BL	0.0847472	8	0.317483
Trial 1	M1-2	C-P	M	0:02:36.940-0:02:37.206	BL	0.0992451	8	0.371799
Trial 1	M1-2	C-P	M	0:02:37.206-0:02:37.472	BL	0.115623	8	0.433149
Trial 1	M1-2	C-P	M	0:02:37.472-0:02:37.738	BL	0.0263255	8	0.0986211
Trial 1	M1-2	C-P	M	0:02:37.738-0:02:38.004	BL	0.0888242	8	0.332761
Trial 1	M1-2	C-P	M	0:02:38.004-0:02:38.270	BL	0.10496	8	0.393208
Trial 1	M1-2	C-P	M	0:02:38.270-0:02:38.536	BL	0.0775507	8	0.290527
Trial 1	M1-2	C-P	M	0:02:38.536-0:02:38.802	BL	0.103959	8	0.389456
Trial 1	M1-2	C-P	M	0:02:38.802-0:02:39.068	BL	0.0914603	8	0.342634
Trial 1	M1-2	C-P	M	0:02:39.068-0:02:39.334	BL	0.141387	8	0.529669
Trial 1	M1-2	C-P	M	0:02:39.334-0:02:39.600	BL	0.0898995	8	0.336784
Trial 1	M1-2	C-P	M	0:02:39.600-0:02:39.866	BL	0.155749	8	0.583472
Trial 1	M1-2	C-P	M	0:02:39.866-0:02:40.132	BL	0.0667025	8	0.249883
Trial 1	M1-2	C-P	M	0:02:40.132-0:02:40.398	BL	0.0632975	8	0.237128
Trial 1	M1-2	C-P	M	0:02:40.398-0:02:40.664	BL	0.0624243	8	0.233856
Trial 1	M1-2	C-P	M	0:02:40.664-0:02:40.930	BL	0.0179719	8	0.0673279
Trial 1	M1-2	C-P	M	0:02:40.930-0:02:41.196	BL	0.0717407	8	0.268759
Trial 1	M1-2	C-P	M	0:02:41.196-0:02:41.462	BL	0.0281148	8	0.105325
Trial 1	M1-2	C-P	M	0:02:41.462-0:02:41.728	BL	0.11257	7	0.481957
Trial 1	M1-2	C-P	M	0:02:41.728-0:02:41.994	BL	0.0802825	8	0.300761
Trial 1	M1-2	C-P	M	0:02:41.994-0:02:42.260	BL	0.160356	8	0.600729
Trial 1	M1-2	C-P	M	0:02:42.260-0:02:42.526	BL	0.11146	8	0.417558
Trial 1	M1-2	C-P	M	0:02:42.526-0:02:42.792	BL	0.0706549	8	0.264691
Trial 1	M1-2	C-P	M	0:02:42.792-0:02:43.058	BL	0.0881485	8	0.330227
Trial 1	M1-2	C-P	M	0:02:43.058-0:02:43.324	BL	0.099389	8	0.372336
Trial 1	M1-2	C-P	M	0:02:43.324-0:02:43.590	BL	0.0371026	8	0.138995
Trial 1	M1-2	C-P	M	0:02:43.590-0:02:43.856	BL	0.0968575	8	0.362851
Trial 1	M1-2	C-P	M	0:02:43.856-0:02:44.122	BL	0.126799	8	0.47502
Trial 1	M1-2	C-P	M	0:02:44.122-0:02:44.388	BL	0.0297298	8	0.111376
Trial 1	M1-2	C-P	M	0:02:44.388-0:02:44.654	BL	0.0932159	8	0.349211
Trial 1	M1-2	C-P	M	0:02:44.654-0:02:44.920	BL	0.0444872	8	0.16666
Trial 1	M1-2	C-P	M	0:02:44.920-0:02:45.186	BL	0.0725017	8	0.271607
Trial 1	M1-2	C-P	M	0:02:45.186-0:02:45.452	BL	0.0716798	8	0.268528
Trial 1	M1-2	C-P	M	0:02:45.452-0:02:45.718	BL	0.0474908	8	0.177911
Trial 1	M1-2	C-P	M	0:02:45.718-0:02:45.984	BL	0.133315	8	0.499428
Trial 1	M1-2	C-P	M	0:02:45.984-0:02:46.250	BL	0.0741648	8	0.277838
Trial 1	M1-2	C-P	M	0:02:46.250-0:02:46.516	BL	0.108061	8	0.404821
Trial 1	M1-2	C-P	M	0:02:46.516-0:02:46.782	BL	0.0285425	8	0.106927
Trial 1	M1-2	C-P	M	0:02:46.782-0:02:47.048	BL	0.132186	8	0.495203
Trial 1	M1-2	C-P	M	0:02:47.048-0:02:47.314	BL	0.032267	8	0.120881
Trial 1	M1-2	C-P	M	0:02:47.314-0:02:47.580	BL	0.0540622	8	0.202529
Trial 1	M1-2	C-P	M	0:02:47.580-0:02:47.846	BL	0.040981	8	0.153525
Trial 1	M1-2	C-P	M	0:02:47.846-0:02:48.112	BL	0.0439308	8	0.164577
Trial 1	M1-2	C-P	M	0:02:48.112-0:02:48.378	BL	0.204296	8	0.765341
Trial 1	M1-2	C-P	M	0:02:48.378-0:02:48.644	BL	0.114205	8	0.427842
Trial 1	M1-2	C-P	M	0:02:48.644-0:02:48.910	BL	0.197641	8	0.740412
Trial 1	M1-2	C-P	M	0:02:48.910-0:02:49.176	BL	0.102662	8	0.384598
Trial 1	M1-2	C-P	M	0:02:49.176-0:02:49.442	BL	0.0606717	8	0.227292
Trial 1	M1-2	C-P	M	0:02:49.442-0:02:49.708	BL	0.0569974	8	0.213525
Trial 1	M1-2	C-P	M	0:02:49.708-0:02:49.974	BL	0.0796985	8	0.298574
Trial 1	M1-2	C-P	M	0:02:49.974-0:02:50.240	BL	0.0655387	8	0.245524
Trial 1	M1-2	C-P	M	0:02:50.240-0:02:50.506	BL	0.0932138	8	0.3492
Trial 1	M1-2	C-P	M	0:02:50.506-0:02:50.772	BL	0.124206	8	0.46531
Trial 1	M1-2	C-P	M	0:02:50.772-0:02:51.038	BL	0.069783	8	0.261423
Trial 1	M1-2	C-P	M	0:02:51.038-0:02:51.304	BL	0.0816083	7	0.349397
Trial 1	M1-2	C-P	M	0:02:51.304-0:02:51.570	BL	0.0893601	8	0.334765
Trial 1	M1-2	C-P	M	0:02:51.570-0:02:51.836	BL	0.0708231	8	0.265319
Trial 1	M1-2	C-P	M	0:02:51.836-0:02:52.102	BL	0.0966702	8	0.36215
Trial 1	M1-2	C-P	M	0:02:52.102-0:02:52.368	BL	0.0639126	8	0.239432
Trial 1	M1-2	C-P	M	0:02:52.368-0:02:52.634	BL	0.047487	8	0.177897
Trial 1	M1-2	C-P	M	0:02:52.634-0:02:52.900	BL	0.0520626	8	0.195039
Trial 1	M1-2	C-P	M	0:02:52.900-0:02:53.166	BL	0.0882822	8	0.330729
Trial 1	M1-2	C-P	M	0:02:53.166-0:02:53.432	BL	0.0514506	8	0.192748
Trial 1	M1-2	C-P	M	0:02:53.432-0:02:53.698	BL	0.111287	8	0.416912
Trial 1	M1-2	C-P	M	0:02:53.698-0:02:53.964	BL	0.126387	8	0.473473
Trial 1	M1-2	C-P	M	0:02:53.964-0:02:54.230	BL	0.0674097	8	0.252534
Trial 1	M1-2	C-P	M	0:02:54.230-0:02:54.496	BL	0.0285567	8	0.106981
Trial 1	M1-2	C-P	M	0:02:54.496-0:02:54.762	BL	0.0707068	8	0.264886
Trial 1	M1-2	C-P	M	0:02:54.762-0:02:55.028	BL	0.0835682	8	0.313066
Trial 1	M1-2	C-P	M	0:02:55.028-0:02:55.294	BL	0.0477271	8	0.178797
Trial 1	M1-2	C-P	M	0:02:55.294-0:02:55.560	BL	0.0808465	8	0.302871
Trial 1	M1-2	C-P	M	0:02:55.560-0:02:55.826	BL	0.112315	8	0.42076
Trial 1	M1-2	C-P	M	0:02:55.826-0:02:56.092	BL	0.157946	8	0.591714
Trial 1	M1-2	C-P	M	0:02:56.092-0:02:56.358	BL	0.0574868	8	0.215361
Trial 1	M1-2	C-P	M	0:02:56.358-0:02:56.624	BL	0.0832147	8	0.311741
Trial 1	M1-2	C-P	M	0:02:56.624-0:02:56.890	BL	0.0680378	8	0.254889
Trial 1	M1-2	C-P	M	0:02:56.890-0:02:57.156	BL	0.0508397	8	0.190458
Trial 1	M1-2	C-P	M	0:02:57.156-0:02:57.422	BL	0.120949	8	0.453104
Trial 1	M1-2	C-P	M	0:02:57.422-0:02:57.688	BL	0.0300646	8	0.112629
Trial 1	M1-2	C-P	M	0:02:57.688-0:02:57.954	BL	0.0545952	8	0.204526
Trial 1	M1-2	C-P	M	0:02:57.954-0:02:58.220	BL	0.0566798	8	0.212338
Trial 1	M1-2	C-P	M	0:02:58.220-0:02:58.486	BL	0.100692	8	0.377215
Trial 1	M1-2	C-P	M	0:02:58.486-0:02:58.752	BL	0.0858818	8	0.321738
Trial 1	M1-2	C-P	M	0:02:58.752-0:02:59.018	BL	0.114174	8	0.427725
Trial 1	M1-2	C-P	M	0:02:59.018-0:02:59.284	BL	0.0753095	8	0.282129
Trial 1	M1-2	C-P	M	0:02:59.284-0:02:59.550	BL	0.0779999	8	0.292208
Trial 1	M1-2	C-P	M	0:02:59.550-0:02:59.816	BL	0.0752905	8	0.282059
Trial 1	M1-2	C-P	M	0:02:59.816-0:03:00.082	CS1a	0.0402312	8	0.150716
Trial 1	M1-2	C-P	M	0:03:00.082-0:03:00.348	CS1a	0.0675216	8	0.252951
Trial 1	M1-2	C-P	M	0:03:00.348-0:03:00.614	CS1a	0.0129424	8	0.0484849
Trial 1	M1-2	C-P	M	0:03:00.614-0:03:00.880	CS1a	0.0518036	7	0.221793
Trial 1	M1-2	C-P	M	0:03:00.880-0:03:01.146	CS1a	0.0846052	8	0.316952
Trial 1	M1-2	C-P	M	0:03:01.146-0:03:01.412	CS1a	0.0711376	8	0.266497
Trial 1	M1-2	C-P	M	0:03:01.412-0:03:01.678	CS1a	0.0848925	8	0.318026
Trial 1	M1-2	C-P	M	0:03:01.678-0:03:01.944	CS1a	0.0817082	8	0.306099
Trial 1	M1-2	C-P	M	0:03:01.944-0:03:02.210	CS1a	0.0644872	8	0.241585
Trial 1	M1-2	C-P	M	0:03:02.210-0:03:02.476	CS1a	0.0281359	8	0.105405
Trial 1	M1-2	C-P	M	0:03:02.476-0:03:02.742	CS1a	0.0352015	8	0.131872
Trial 1	M1-2	C-P	M	0:03:02.742-0:03:03.008	CS1a	0.0321476	8	0.120434
Trial 1	M1-2	C-P	M	0:03:03.008-0:03:03.274	CS1a	0.133819	8	0.501316
Trial 1	M1-2	C-P	M	0:03:03.274-0:03:03.540	CS1a	0.105187	8	0.394055
Trial 1	M1-2	C-P	M	0:03:03.540-0:03:03.806	CS1a	0.14961	8	0.560475
Trial 1	M1-2	C-P	M	0:03:03.806-0:03:04.072	CS1a	0.0397438	8	0.148889
Trial 1	M1-2	C-P	M	0:03:04.072-0:03:04.338	CS1a	0.131513	8	0.492683
Trial 1	M1-2	C-P	M	0:03:04.338-0:03:04.604	CS1a	0.0966993	8	0.362257
Trial 1	M1-2	C-P	M	0:03:04.604-0:03:04.870	CS1a	0.0427681	8	0.16022
Trial 1	M1-2	C-P	M	0:03:04.870-0:03:05.136	CS1a	0.104455	8	0.391315
Trial 1	M1-2	C-P	M	0:03:05.136-0:03:05.402	CS1a	0.0730343	8	0.273604
Trial 1	M1-2	C-P	M	0:03:05.402-0:03:05.668	CS1a	0.076528	8	0.286694
Trial 1	M1-2	C-P	M	0:03:05.668-0:03:05.934	CS1a	0.0703449	8	0.263529
Trial 1	M1-2	C-P	M	0:03:05.934-0:03:06.200	CS1a	0.0452977	8	0.169696
Trial 1	M1-2	C-P	M	0:03:06.200-0:03:06.466	CS1a	0.0677941	8	0.253977
Trial 1	M1-2	C-P	M	0:03:06.466-0:03:06.732	CS1a	0.0281942	8	0.105623
Trial 1	M1-2	C-P	M	0:03:06.732-0:03:06.998	CS1a	0.156622	8	0.586746
Trial 1	M1-2	C-P	M	0:03:06.998-0:03:07.264	CS1a	0.0928665	8	0.347901
Trial 1	M1-2	C-P	M	0:03:07.264-0:03:07.530	CS1a	0.138724	8	0.519695
Trial 1	M1-2	C-P	M	0:03:07.530-0:03:07.796	CS1a	0.0609362	8	0.228284
Trial 1	M1-2	C-P	M	0:03:07.796-0:03:08.062	CS1a	0.103276	8	0.386899
Trial 1	M1-2	C-P	M	0:03:08.062-0:03:08.328	CS1a	0.0589429	8	0.220818
Trial 1	M1-2	C-P	M	0:03:08.328-0:03:08.594	CS1a	0.0817731	8	0.306342
Trial 1	M1-2	C-P	M	0:03:08.594-0:03:08.860	CS1a	0.0676994	8	0.25362
Trial 1	M1-2	C-P	M	0:03:08.860-0:03:09.126	CS1a	0.0218098	8	0.0817053
Trial 1	M1-2	C-P	M	0:03:09.126-0:03:09.392	CS1a	0.0635654	8	0.238131
Trial 1	M1-2	C-P	M	0:03:09.392-0:03:09.658	CS1a	0.0577299	8	0.216271
Trial 1	M1-2	C-P	M	0:03:09.658-0:03:09.924	CS1a	0.144969	8	0.54309
Trial 1	M1-2	C-P	M	0:03:09.924-0:03:10.190	CS1b	0.188706	7	0.807926
Trial 1	M1-2	C-P	M	0:03:10.190-0:03:10.456	CS1b	0.285939	8	1.0712
Trial 1	M1-2	C-P	M	0:03:10.456-0:03:10.722	CS1b	0.228627	8	0.856491
Trial 1	M1-2	C-P	M	0:03:10.722-0:03:10.988	CS1b	0.0894032	8	0.334926
Trial 1	M1-2	C-P	M	0:03:10.988-0:03:11.254	CS1b	0.193815	8	0.726087
Trial 1	M1-2	C-P	M	0:03:11.254-0:03:11.520	CS1b	0.0751524	8	0.281539
Trial 1	M1-2	C-P	M	0:03:11.520-0:03:11.786	CS1b	0.129053	8	0.483466
Trial 1	M1-2	C-P	M	0:03:11.786-0:03:12.052	CS1b	0.0302426	8	0.113296
Trial 1	M1-2	C-P	M	0:03:12.052-0:03:12.318	CS1b	0.0768124	8	0.287758
Trial 1	M1-2	C-P	M	0:03:12.318-0:03:12.584	CS1b	0.037643	8	0.141021
Trial 1	M1-2	C-P	M	0:03:12.584-0:03:12.850	CS1b	0.0778779	8	0.291748
Trial 1	M1-2	C-P	M	0:03:12.850-0:03:13.116	CS1b	0.0887226	8	0.332383
Trial 1	M1-2	C-P	M	0:03:13.116-0:03:13.382	CS1b	0.394179	8	1.47668
Trial 1	M1-2	C-P	M	0:03:13.382-0:03:13.648	CS1b	13.6989	8	51.3194
Trial 1	M1-2	C-P	M	0:03:13.648-0:03:13.914	CS1b	5.83249	8	21.85
Trial 1	M1-2	C-P	M	0:03:13.914-0:03:14.180	CS1b	3.39539	8	12.72
Trial 1	M1-2	C-P	M	0:03:14.180-0:03:14.446	CS1b	3.03826	8	11.3821
Trial 1	M1-2	C-P	M	0:03:14.446-0:03:14.712	CS1b	2.6385	8	9.88442
Trial 1	M1-2	C-P	M	0:03:14.712-0:03:14.978	CS1b	1.73922	8	6.51551
Trial 1	M1-2	C-P	M	0:03:14.978-0:03:15.244	CS1b	1.51228	8	5.66534
Trial 1	M1-2	C-P	M	0:03:15.244-0:03:15.510	CS1b	0.901115	8	3.37583
Trial 1	M1-2	C-P	M	0:03:15.510-0:03:15.776	CS1b	1.47553	8	5.52773
Trial 1	M1-2	C-P	M	0:03:15.776-0:03:16.042	CS1b	0.954094	8	3.57428
Trial 1	M1-2	C-P	M	0:03:16.042-0:03:16.308	CS1b	2.38943	8	8.95138
Trial 1	M1-2	C-P	M	0:03:16.308-0:03:16.574	CS1b	0.553433	8	2.07331
Trial 1	M1-2	C-P	M	0:03:16.574-0:03:16.840	CS1b	0.221352	8	0.829236
Trial 1	M1-2	C-P	M	0:03:16.840-0:03:17.106	CS1b	0.335339	8	1.25627
Trial 1	M1-2	C-P	M	0:03:17.106-0:03:17.372	CS1b	1.0618	8	3.97777
Trial 1	M1-2	C-P	M	0:03:17.372-0:03:17.638	CS1b	2.85206	8	10.6845
Trial 1	M1-2	C-P	M	0:03:17.638-0:03:17.904	CS1b	0.670777	8	2.51292
Trial 1	M1-2	C-P	M	0:03:17.904-0:03:18.170	CS1b	1.38458	8	5.18698
Trial 1	M1-2	C-P	M	0:03:18.170-0:03:18.436	CS1b	1.87636	8	7.02932
Trial 1	M1-2	C-P	M	0:03:18.436-0:03:18.702	CS1b	3.84014	8	14.3862
Trial 1	M1-2	C-P	M	0:03:18.702-0:03:18.968	CS1b	1.85253	8	6.94006
Trial 1	M1-2	C-P	M	0:03:18.968-0:03:19.234	CS1b	1.37537	8	5.1525
Trial 1	M1-2	C-P	M	0:03:19.234-0:03:19.500	CS1b	2.54778	8	9.5446
Trial 1	M1-2	C-P	M	0:03:19.500-0:03:19.766	CS1b	0.515102	7	2.20539
Trial 1	M1-2	C-P	M	0:03:19.766-0:03:20.032	CS1b	0.964795	8	3.61437
Trial 1	M1-2	C-P	M	0:03:20.032-0:03:20.298	IT1	0.657873	8	2.46455
Trial 1	M1-2	C-P	M	0:03:20.298-0:03:20.564	IT1	0.218096	8	0.817046
Trial 1	M1-2	C-P	M	0:03:20.564-0:03:20.830	IT1	0.664405	8	2.48905
Trial 1	M1-2	C-P	M	0:03:20.830-0:03:21.096	IT1	0.150523	8	0.5639
Trial 1	M1-2	C-P	M	0:03:21.096-0:03:21.362	IT1	0.225874	8	0.846175
Trial 1	M1-2	C-P	M	0:03:21.362-0:03:21.628	IT1	0.114564	8	0.429184
Trial 1	M1-2	C-P	M	0:03:21.628-0:03:21.894	IT1	0.252359	8	0.94541
Trial 1	M1-2	C-P	M	0:03:21.894-0:03:22.160	IT1	0.0104529	8	0.0391599
Trial 1	M1-2	C-P	M	0:03:22.160-0:03:22.426	IT1	0.194411	8	0.728311
Trial 1	M1-2	C-P	M	0:03:22.426-0:03:22.692	IT1	0.209562	8	0.785067
Trial 1	M1-2	C-P	M	0:03:22.692-0:03:22.958	IT1	0.0380677	8	0.142611
Trial 1	M1-2	C-P	M	0:03:22.958-0:03:23.224	IT1	0.144818	8	0.542529
Trial 1	M1-2	C-P	M	0:03:23.224-0:03:23.490	IT1	0.0216851	8	0.0812377
Trial 1	M1-2	C-P	M	0:03:23.490-0:03:23.756	IT1	0.14997	8	0.561824
Trial 1	M1-2	C-P	M	0:03:23.756-0:03:24.022	IT1	0.0676698	8	0.253511
Trial 1	M1-2	C-P	M	0:03:24.022-0:03:24.288	IT1	0.334392	8	1.25271
Trial 1	M1-2	C-P	M	0:03:24.288-0:03:24.554	IT1	0.139758	8	0.523573
Trial 1	M1-2	C-P	M	0:03:24.554-0:03:24.820	IT1	0.0606474	8	0.2272
Trial 1	M1-2	C-P	M	0:03:24.820-0:03:25.086	IT1	0.10296	8	0.385713
Trial 1	M1-2	C-P	M	0:03:25.086-0:03:25.352	IT1	0.0225445	8	0.0844564
Trial 1	M1-2	C-P	M	0:03:25.352-0:03:25.618	IT1	0.212419	8	0.795775
Trial 1	M1-2	C-P	M	0:03:25.618-0:03:25.884	IT1	0.0247312	8	0.0926488
Trial 1	M1-2	C-P	M	0:03:25.884-0:03:26.150	IT1	0.0893507	8	0.334733
Trial 1	M1-2	C-P	M	0:03:26.150-0:03:26.416	IT1	0.180223	8	0.67517
Trial 1	M1-2	C-P	M	0:03:26.416-0:03:26.682	IT1	0.14304	8	0.535858
Trial 1	M1-2	C-P	M	0:03:26.682-0:03:26.948	IT1	0.0597921	8	0.223996
Trial 1	M1-2	C-P	M	0:03:26.948-0:03:27.214	IT1	0.192523	8	0.721242
Trial 1	M1-2	C-P	M	0:03:27.214-0:03:27.480	IT1	0.0974518	8	0.365082
Trial 1	M1-2	C-P	M	0:03:27.480-0:03:27.746	IT1	0.0602935	8	0.225877
Trial 1	M1-2	C-P	M	0:03:27.746-0:03:28.012	IT1	0.233304	8	0.874009
Trial 1	M1-2	C-P	M	0:03:28.012-0:03:28.278	IT1	0.133132	8	0.498745
Trial 1	M1-2	C-P	M	0:03:28.278-0:03:28.544	IT1	0.277041	8	1.03786
Trial 1	M1-2	C-P	M	0:03:28.544-0:03:28.810	IT1	0.293001	8	1.09767
Trial 1	M1-2	C-P	M	0:03:28.810-0:03:29.076	IT1	0.394251	8	1.47697
Trial 1	M1-2	C-P	M	0:03:29.076-0:03:29.342	IT1	0.0183968	7	0.0787637
Trial 1	M1-2	C-P	M	0:03:29.342-0:03:29.608	IT1	0.749328	8	2.80719
Trial 1	M1-2	C-P	M	0:03:29.608-0:03:29.874	IT1	1.52409	8	5.70966
Trial 1	M1-2	C-P	M	0:03:29.874-0:03:30.140	IT1	0.527398	8	1.97578
Trial 1	M1-2	C-P	M	0:03:30.140-0:03:30.406	IT1	2.18021	8	8.16758
Trial 1	M1-2	C-P	M	0:03:30.406-0:03:30.672	IT1	1.6235	8	6.08202
Trial 1	M1-2	C-P	M	0:03:30.672-0:03:30.938	IT1	1.23885	8	4.64103
Trial 1	M1-2	C-P	M	0:03:30.938-0:03:31.204	IT1	0.479755	8	1.79727
Trial 1	M1-2	C-P	M	0:03:31.204-0:03:31.470	IT1	0.349829	8	1.31055
Trial 1	M1-2	C-P	M	0:03:31.470-0:03:31.736	IT1	0.312549	8	1.17089
Trial 1	M1-2	C-P	M	0:03:31.736-0:03:32.002	IT1	0.0636065	8	0.238285
Trial 1	M1-2	C-P	M	0:03:32.002-0:03:32.268	IT1	0.114961	8	0.430671
Trial 1	M1-2	C-P	M	0:03:32.268-0:03:32.534	IT1	0.0548621	8	0.205529
Trial 1	M1-2	C-P	M	0:03:32.534-0:03:32.800	IT1	0.1634	8	0.612139
Trial 1	M1-2	C-P	M	0:03:32.800-0:03:33.066	IT1	0.097735	8	0.366138
Trial 1	M1-2	C-P	M	0:03:33.066-0:03:33.332	IT1	0.0864026	8	0.323684
Trial 1	M1-2	C-P	M	0:03:33.332-0:03:33.598	IT1	0.152781	8	0.572356
Trial 1	M1-2	C-P	M	0:03:33.598-0:03:33.864	IT1	0.204306	8	0.765379
Trial 1	M1-2	C-P	M	0:03:33.864-0:03:34.130	IT1	0.19619	8	0.734975
Trial 1	M1-2	C-P	M	0:03:34.130-0:03:34.396	IT1	0.206658	8	0.77419
Trial 1	M1-2	C-P	M	0:03:34.396-0:03:34.662	IT1	0.281269	8	1.0537
Trial 1	M1-2	C-P	M	0:03:34.662-0:03:34.928	IT1	0.347155	8	1.30053
Trial 1	M1-2	C-P	M	0:03:34.928-0:03:35.194	IT1	0.431927	8	1.61811
Trial 1	M1-2	C-P	M	0:03:35.194-0:03:35.460	IT1	0.488401	8	1.82969
Trial 1	M1-2	C-P	M	0:03:35.460-0:03:35.726	IT1	0.443714	8	1.66226
Trial 1	M1-2	C-P	M	0:03:35.726-0:03:35.992	IT1	0.260017	8	0.974087
Trial 1	M1-2	C-P	M	0:03:35.992-0:03:36.258	IT1	0.452454	8	1.69501
Trial 1	M1-2	C-P	M	0:03:36.258-0:03:36.524	IT1	0.479956	8	1.79803
Trial 1	M1-2	C-P	M	0:03:36.524-0:03:36.790	IT1	0.304637	8	1.14124
Trial 1	M1-2	C-P	M	0:03:36.790-0:03:37.056	IT1	0.283438	8	1.06183
Trial 1	M1-2	C-P	M	0:03:37.056-0:03:37.322	IT1	0.256825	8	0.962128
Trial 1	M1-2	C-P	M	0:03:37.322-0:03:37.588	IT1	0.260536	8	0.976029
Trial 1	M1-2	C-P	M	0:03:37.588-0:03:37.854	IT1	0.126531	8	0.474015
Trial 1	M1-2	C-P	M	0:03:37.854-0:03:38.120	IT1	0.240732	8	0.901859
Trial 1	M1-2	C-P	M	0:03:38.120-0:03:38.386	IT1	0.0808455	8	0.302867
Trial 1	M1-2	C-P	M	0:03:38.386-0:03:38.652	IT1	0.134071	8	0.502265
Trial 1	M1-2	C-P	M	0:03:38.652-0:03:38.918	IT1	0.0477212	7	0.204315
Trial 1	M1-2	C-P	M	0:03:38.918-0:03:39.184	IT1	0.078976	8	0.295867
Trial 1	M1-2	C-P	M	0:03:39.184-0:03:39.450	IT1	0.138801	8	0.519982
Trial 1	M1-2	C-P	M	0:03:39.450-0:03:39.716	IT1	0.0703456	8	0.263533
Trial 1	M1-2	C-P	M	0:03:39.716-0:03:39.982	IT1	0.117347	8	0.439611
Trial 1	M1-2	C-P	M	0:03:39.982-0:03:40.248	IT1	0.129545	8	0.485307
Trial 1	M1-2	C-P	M	0:03:40.248-0:03:40.514	IT1	0.149008	8	0.558218
Trial 1	M1-2	C-P	M	0:03:40.514-0:03:40.780	IT1	0.0815163	8	0.305379
Trial 1	M1-2	C-P	M	0:03:40.780-0:03:41.046	IT1	0.130315	8	0.488194
Trial 1	M1-2	C-P	M	0:03:41.046-0:03:41.312	IT1	0.142619	8	0.534283
Trial 1	M1-2	C-P	M	0:03:41.312-0:03:41.578	IT1	0.133686	8	0.500821
Trial 1	M1-2	C-P	M	0:03:41.578-0:03:41.844	IT1	0.148649	8	0.55688
Trial 1	M1-2	C-P	M	0:03:41.844-0:03:42.110	IT1	0.181719	8	0.680766
Trial 1	M1-2	C-P	M	0:03:42.110-0:03:42.376	IT1	0.172619	8	0.646675
Trial 1	M1-2	C-P	M	0:03:42.376-0:03:42.642	IT1	0.0587082	8	0.219935
Trial 1	M1-2	C-P	M	0:03:42.642-0:03:42.908	IT1	0.0776506	8	0.290897
Trial 1	M1-2	C-P	M	0:03:42.908-0:03:43.174	IT1	0.152837	8	0.572568
Trial 1	M1-2	C-P	M	0:03:43.174-0:03:43.440	IT1	0.0660192	8	0.247323
Trial 1	M1-2	C-P	M	0:03:43.440-0:03:43.706	IT1	0.136119	8	0.509934
Trial 1	M1-2	C-P	M	0:03:43.706-0:03:43.972	IT1	0.0621681	8	0.232896
Trial 1	M1-2	C-P	M	0:03:43.972-0:03:44.238	IT1	0.0806345	8	0.30208
Trial 1	M1-2	C-P	M	0:03:44.238-0:03:44.504	IT1	0.0731079	8	0.273883
Trial 1	M1-2	C-P	M	0:03:44.504-0:03:44.770	IT1	0.197497	8	0.739868
Trial 1	M1-2	C-P	M	0:03:44.770-0:03:45.036	IT1	0.107849	8	0.404025
Trial 1	M1-2	C-P	M	0:03:45.036-0:03:45.302	IT1	0.155323	8	0.581876
Trial 1	M1-2	C-P	M	0:03:45.302-0:03:45.568	IT1	0.0988527	8	0.370327
Trial 1	M1-2	C-P	M	0:03:45.568-0:03:45.834	IT1	0.106882	8	0.400406
Trial 1	M1-2	C-P	M	0:03:45.834-0:03:46.100	IT1	0.0929623	8	0.348257
Trial 1	M1-2	C-P	M	0:03:46.100-0:03:46.366	IT1	0.0922716	8	0.345672
Trial 1	M1-2	C-P	M	0:03:46.366-0:03:46.632	IT1	0.0931526	8	0.348972
Trial 1	M1-2	C-P	M	0:03:46.632-0:03:46.898	IT1	0.0808831	8	0.303008
Trial 1	M1-2	C-P	M	0:03:46.898-0:03:47.164	IT1	0.196505	8	0.736155
Trial 1	M1-2	C-P	M	0:03:47.164-0:03:47.430	IT1	0.0410221	8	0.153678
Trial 1	M1-2	C-P	M	0:03:47.430-0:03:47.696	IT1	0.185443	8	0.694716
Trial 1	M1-2	C-P	M	0:03:47.696-0:03:47.962	IT1	0.106311	8	0.398268
Trial 1	M1-2	C-P	M	0:03:47.962-0:03:48.228	IT1	0.0450002	7	0.192665
Trial 1	M1-2	C-P	M	0:03:48.228-0:03:48.494	IT1	0.111613	8	0.418129
Trial 1	M1-2	C-P	M	0:03:48.494-0:03:48.760	IT1	0.0905623	8	0.339269
Trial 1	M1-2	C-P	M	0:03:48.760-0:03:49.026	IT1	0.178226	8	0.667673
Trial 1	M1-2	C-P	M	0:03:49.026-0:03:49.292	IT1	0.0789317	8	0.2957
Trial 1	M1-2	C-P	M	0:03:49.292-0:03:49.558	IT1	0.211798	8	0.793448
Trial 1	M1-2	C-P	M	0:03:49.558-0:03:49.824	IT1	0.0531511	8	0.199119
Trial 1	M1-2	C-P	M	0:03:49.824-0:03:50.090	IT1	0.158216	8	0.592716
Trial 1	M1-2	C-P	M	0:03:50.090-0:03:50.356	IT1	0.104581	8	0.391785
Trial 1	M1-2	C-P	M	0:03:50.356-0:03:50.622	IT1	0.0753459	8	0.282264
Trial 1	M1-2	C-P	M	0:03:50.622-0:03:50.888	IT1	0.138142	8	0.517515
Trial 1	M1-2	C-P	M	0:03:50.888-0:03:51.154	IT1	0.0499273	8	0.187041
Trial 1	M1-2	C-P	M	0:03:51.154-0:03:51.420	IT1	0.133828	8	0.501355
Trial 1	M1-2	C-P	M	0:03:51.420-0:03:51.686	IT1	0.0739748	8	0.277128
Trial 1	M1-2	C-P	M	0:03:51.686-0:03:51.952	IT1	0.143755	8	0.538538
Trial 1	M1-2	C-P	M	0:03:51.952-0:03:52.218	IT1	0.241118	8	0.903283
Trial 1	M1-2	C-P	M	0:03:52.218-0:03:52.484	IT1	0.106874	8	0.400381
Trial 1	M1-2	C-P	M	0:03:52.484-0:03:52.750	IT1	0.102474	8	0.383891
Trial 1	M1-2	C-P	M	0:03:52.750-0:03:53.016	IT1	0.0929483	8	0.348205
Trial 1	M1-2	C-P	M	0:03:53.016-0:03:53.282	IT1	0.462617	8	1.73309
Trial 1	M1-2	C-P	M	0:03:53.282-0:03:53.548	IT1	0.271566	8	1.01735
Trial 1	M1-2	C-P	M	0:03:53.548-0:03:53.814	IT1	0.233649	8	0.875313
Trial 1	M1-2	C-P	M	0:03:53.814-0:03:54.080	IT1	0.356837	8	1.33681
Trial 1	M1-2	C-P	M	0:03:54.080-0:03:54.346	IT1	0.707413	8	2.65015
Trial 1	M1-2	C-P	M	0:03:54.346-0:03:54.612	IT1	0.505379	8	1.89328
Trial 1	M1-2	C-P	M	0:03:54.612-0:03:54.878	IT1	0.465664	8	1.74449
Trial 1	M1-2	C-P	M	0:03:54.878-0:03:55.144	IT1	0.362019	8	1.35622
Trial 1	M1-2	C-P	M	0:03:55.144-0:03:55.410	IT1	0.604584	8	2.26492
Trial 1	M1-2	C-P	M	0:03:55.410-0:03:55.676	IT1	0.918197	8	3.43979
Trial 1	M1-2	C-P	M	0:03:55.676-0:03:55.942	IT1	0.736369	8	2.75863
Trial 1	M1-2	C-P	M	0:03:55.942-0:03:56.208	IT1	0.386122	8	1.44651
Trial 1	M1-2	C-P	M	0:03:56.208-0:03:56.474	IT1	0.216704	8	0.811836
Trial 1	M1-2	C-P	M	0:03:56.474-0:03:56.740	IT1	0.9139	8	3.42369
Trial 1	M1-2	C-P	M	0:03:56.740-0:03:57.006	IT1	0.657681	8	2.46383
Trial 1	M1-2	C-P	M	0:03:57.006-0:03:57.272	IT1	3.23299	8	12.1116
Trial 1	M1-2	C-P	M	0:03:57.272-0:03:57.538	IT1	2.16466	8	8.10937
Trial 1	M1-2	C-P	M	0:03:57.538-0:03:57.804	IT1	2.00704	7	8.59301
Trial 1	M1-2	C-P	M	0:03:57.804-0:03:58.070	IT1	1.4029	8	5.25563
Trial 1	M1-2	C-P	M	0:03:58.070-0:03:58.336	IT1	2.27173	8	8.51045
Trial 1	M1-2	C-P	M	0:03:58.336-0:03:58.602	IT1	0.96093	8	3.59987
Trial 1	M1-2	C-P	M	0:03:58.602-0:03:58.868	IT1	1.39658	8	5.23195
Trial 1	M1-2	C-P	M	0:03:58.868-0:03:59.134	IT1	1.90819	8	7.14856
Trial 1	M1-2	C-P	M	0:03:59.134-0:03:59.400	IT1	1.72651	8	6.46798
Trial 1	M1-2	C-P	M	0:03:59.400-0:03:59.666	IT1	2.54564	8	9.53656
Trial 1	M1-2	C-P	M	0:03:59.666-0:03:59.932	IT1	0.380631	8	1.42593
Trial 1	M1-2	C-P	M	0:03:59.932-0:04:00.198	IT1	2.86682	8	10.7399
Trial 1	M1-2	C-P	M	0:04:00.198-0:04:00.464	IT1	4.06877	8	15.2426
Trial 1	M1-2	C-P	M	0:04:00.464-0:04:00.730	IT1	0.821459	8	3.0774
Trial 1	M1-2	C-P	M	0:04:00.730-0:04:00.996	IT1	1.40306	8	5.2562
Trial 1	M1-2	C-P	M	0:04:00.996-0:04:01.262	IT1	1.09892	8	4.11679
Trial 1	M1-2	C-P	M	0:04:01.262-0:04:01.528	IT1	0.647108	8	2.42424
Trial 1	M1-2	C-P	M	0:04:01.528-0:04:01.794	IT1	0.502926	8	1.88407
Trial 1	M1-2	C-P	M	0:04:01.794-0:04:02.060	IT1	0.61493	8	2.30369
Trial 1	M1-2	C-P	M	0:04:02.060-0:04:02.326	IT1	0.364035	8	1.36376
Trial 1	M1-2	C-P	M	0:04:02.326-0:04:02.592	IT1	0.475417	8	1.78103
Trial 1	M1-2	C-P	M	0:04:02.592-0:04:02.858	IT1	0.460847	8	1.72645
Trial 1	M1-2	C-P	M	0:04:02.858-0:04:03.124	IT1	0.596839	8	2.23591
Trial 1	M1-2	C-P	M	0:04:03.124-0:04:03.390	IT1	0.426529	8	1.59789
Trial 1	M1-2	C-P	M	0:04:03.390-0:04:03.656	IT1	0.561145	8	2.10218
Trial 1	M1-2	C-P	M	0:04:03.656-0:04:03.922	IT1	1.24356	8	4.65866
Trial 1	M1-2	C-P	M	0:04:03.922-0:04:04.188	IT1	1.71873	8	6.43881
Trial 1	M1-2	C-P	M	0:04:04.188-0:04:04.454	IT1	1.49726	8	5.6091
Trial 1	M1-2	C-P	M	0:04:04.454-0:04:04.720	IT1	0.725131	8	2.71652
Trial 1	M1-2	C-P	M	0:04:04.720-0:04:04.986	IT1	0.660187	8	2.47322
Trial 1	M1-2	C-P	M	0:04:04.986-0:04:05.252	IT1	0.260255	8	0.974981
Trial 1	M1-2	C-P	M	0:04:05.252-0:04:05.518	IT1	0.486128	8	1.82117
Trial 1	M1-2	C-P	M	0:04:05.518-0:04:05.784	IT1	0.482785	8	1.80864
Trial 1	M1-2	C-P	M	0:04:05.784-0:04:06.050	IT1	0.623884	8	2.33723
Trial 1	M1-2	C-P	M	0:04:06.050-0:04:06.316	IT1	0.746777	8	2.7976
Trial 1	M1-2	C-P	M	0:04:06.316-0:04:06.582	IT1	0.274789	8	1.02942
Trial 1	M1-2	C-P	M	0:04:06.582-0:04:06.848	IT1	0.393964	8	1.47589
Trial 1	M1-2	C-P	M	0:04:06.848-0:04:07.114	IT1	0.612632	8	2.29508
Trial 1	M1-2	C-P	M	0:04:07.114-0:04:07.380	IT1	0.25106	7	1.0749
Trial 1	M1-2	C-P	M	0:04:07.380-0:04:07.646	IT1	0.1877	8	0.703174
Trial 1	M1-2	C-P	M	0:04:07.646-0:04:07.912	IT1	0.0263447	8	0.0986937
Trial 1	M1-2	C-P	M	0:04:07.912-0:04:08.178	IT1	0.0263447	8	0.098694
Trial 1	M1-2	C-P	M	0:04:08.178-0:04:08.444	IT1	0.0263447	8	0.0986937
Trial 1	M1-2	C-P	M	0:04:08.444-0:04:08.710	IT1	0.0263447	8	0.0986937
Trial 1	M1-2	C-P	M	0:04:08.710-0:04:08.976	IT1	0.0263447	8	0.098694
Trial 1	M1-2	C-P	M	0:04:08.976-0:04:09.242	IT1	0.0263447	8	0.0986937
Trial 1	M1-2	C-P	M	0:04:09.242-0:04:09.508	IT1	0.0263447	8	0.098694
Trial 1	M1-2	C-P	M	0:04:09.508-0:04:09.774	IT1	0.0263447	8	0.0986937
Trial 1	M1-2	C-P	M	0:04:09.774-0:04:10.040	IT1	0.0263447	8	0.0986937
Trial 1	M1-2	C-P	M	0:04:10.040-0:04:10.306	IT1	0.0263447	8	0.098694
Trial 1	M1-2	C-P	M	0:04:10.306-0:04:10.572	IT1	0.0263447	8	0.0986937
Trial 1	M1-2	C-P	M	0:04:10.572-0:04:10.838	IT1	0.0263447	8	0.098694
Trial 1	M1-2	C-P	M	0:04:10.838-0:04:11.104	IT1	0.0263447	8	0.0986937
Trial 1	M1-2	C-P	M	0:04:11.104-0:04:11.370	IT1	0.0263447	8	0.0986937
Trial 1	M1-2	C-P	M	0:04:11.370-0:04:11.636	IT1	0.0263447	8	0.098694
Trial 1	M1-2	C-P	M	0:04:11.636-0:04:11.902	IT1	0.0263447	8	0.0986937
Trial 1	M1-2	C-P	M	0:04:11.902-0:04:12.168	IT1	0.0263447	8	0.098694
Trial 1	M1-2	C-P	M	0:04:12.168-0:04:12.434	IT1	0.0263447	8	0.0986937
Trial 1	M1-2	C-P	M	0:04:12.434-0:04:12.700	IT1	0.0263447	8	0.0986937
Trial 1	M1-2	C-P	M	0:04:12.700-0:04:12.966	IT1	1.50943	8	5.65483
Trial 1	M1-2	C-P	M	0:04:12.966-0:04:13.232	IT1	1.61179	8	6.03812
Trial 1	M1-2	C-P	M	0:04:13.232-0:04:13.498	IT1	1.2633	8	4.73263
Trial 1	M1-2	C-P	M	0:04:13.498-0:04:13.764	IT1	0.642309	8	2.40625
Trial 1	M1-2	C-P	M	0:04:13.764-0:04:14.030	IT1	1.00601	8	3.76875
Trial 1	M1-2	C-P	M	0:04:14.030-0:04:14.296	IT1	1.1207	8	4.19843
Trial 1	M1-2	C-P	M	0:04:14.296-0:04:14.562	IT1	0.716118	8	2.68275
Trial 1	M1-2	C-P	M	0:04:14.562-0:04:14.828	IT1	0.595428	8	2.23063
Trial 1	M1-2	C-P	M	0:04:14.828-0:04:15.094	IT1	0.281959	8	1.05629
Trial 1	M1-2	C-P	M	0:04:15.094-0:04:15.360	IT1	0.78565	8	2.94322
Trial 1	M1-2	C-P	M	0:04:15.360-0:04:15.626	IT1	2.29428	8	8.59495
Trial 1	M1-2	C-P	M	0:04:15.626-0:04:15.892	IT1	1.65982	8	6.21809
Trial 1	M1-2	C-P	M	0:04:15.892-0:04:16.158	IT1	0.874746	8	3.27702
Trial 1	M1-2	C-P	M	0:04:16.158-0:04:16.424	IT1	0.4095	8	1.53409
Trial 1	M1-2	C-P	M	0:04:16.424-0:04:16.690	IT1	0.414467	7	1.7745
Trial 1	M1-2	C-P	M	0:04:16.690-0:04:16.956	IT1	0.411964	8	1.54332
Trial 1	M1-2	C-P	M	0:04:16.956-0:04:17.222	IT1	0.165165	8	0.618751
Trial 1	M1-2	C-P	M	0:04:17.222-0:04:17.488	IT1	0.0816355	8	0.305826
Trial 1	M1-2	C-P	M	0:04:17.488-0:04:17.754	IT1	0.214902	8	0.805076
Trial 1	M1-2	C-P	M	0:04:17.754-0:04:18.020	IT1	0.330869	8	1.23952
Trial 1	M1-2	C-P	M	0:04:18.020-0:04:18.286	IT1	0.268534	8	1.00599
Trial 1	M1-2	C-P	M	0:04:18.286-0:04:18.552	IT1	0.614823	8	2.30328
Trial 1	M1-2	C-P	M	0:04:18.552-0:04:18.818	IT1	2.44786	8	9.17028
Trial 1	M1-2	C-P	M	0:04:18.818-0:04:19.084	IT1	3.44461	8	12.9044
Trial 1	M1-2	C-P	M	0:04:19.084-0:04:19.350	IT1	4.5093	8	16.893
Trial 1	M1-2	C-P	M	0:04:19.350-0:04:19.616	IT1	3.85668	8	14.4481
Trial 1	M1-2	C-P	M	0:04:19.616-0:04:19.882	IT1	0.755089	8	2.82877
Trial 1	M1-2	C-P	M	0:04:19.882-0:04:20.148	IT1	0.622736	8	2.33292
Trial 1	M1-2	C-P	M	0:04:20.148-0:04:20.414	IT1	0.218735	8	0.819435
Trial 1	M1-2	C-P	M	0:04:20.414-0:04:20.680	IT1	0.7541	8	2.82504
Trial 1	M1-2	C-P	M	0:04:20.680-0:04:20.946	IT1	0.28558	8	1.06986
Trial 1	M1-2	C-P	M	0:04:20.946-0:04:21.212	IT1	0.531107	8	1.98967
Trial 1	M1-2	C-P	M	0:04:21.212-0:04:21.478	IT1	0.675983	8	2.53239
Trial 1	M1-2	C-P	M	0:04:21.478-0:04:21.744	IT1	0.508804	8	1.9061
Trial 1	M1-2	C-P	M	0:04:21.744-0:04:22.010	IT1	0.520431	8	1.94966
Trial 1	M1-2	C-P	M	0:04:22.010-0:04:22.276	IT1	0.982268	8	3.6798
Trial 1	M1-2	C-P	M	0:04:22.276-0:04:22.542	IT1	0.518118	8	1.941
Trial 1	M1-2	C-P	M	0:04:22.542-0:04:22.808	IT1	0.294317	8	1.10259
Trial 1	M1-2	C-P	M	0:04:22.808-0:04:23.074	IT1	0.14698	8	0.550631
Trial 1	M1-2	C-P	M	0:04:23.074-0:04:23.340	IT1	0.24581	8	0.920865
Trial 1	M1-2	C-P	M	0:04:23.340-0:04:23.606	IT1	0.235319	8	0.881566
Trial 1	M1-2	C-P	M	0:04:23.606-0:04:23.872	IT1	0.189628	8	0.710392
Trial 1	M1-2	C-P	M	0:04:23.872-0:04:24.138	IT1	0.158535	8	0.593912
Trial 1	M1-2	C-P	M	0:04:24.138-0:04:24.404	IT1	0.188058	8	0.704515
Trial 1	M1-2	C-P	M	0:04:24.404-0:04:24.670	IT1	0.108399	8	0.406088
Trial 1	M1-2	C-P	M	0:04:24.670-0:04:24.936	IT1	0.352723	8	1.32138
Trial 1	M1-2	C-P	M	0:04:24.936-0:04:25.202	IT1	0.559879	8	2.09744
Trial 1	M1-2	C-P	M	0:04:25.202-0:04:25.468	IT1	0.332126	8	1.24422
Trial 1	M1-2	C-P	M	0:04:25.468-0:04:25.734	IT1	0.128741	8	0.482301
Trial 1	M1-2	C-P	M	0:04:25.734-0:04:26.000	IT1	0.0767329	8	0.28746
Trial 1	M1-2	C-P	M	0:04:26.000-0:04:26.266	IT1	0.196588	7	0.841683
Trial 1	M1-2	C-P	M	0:04:26.266-0:04:26.532	IT1	0.248731	8	0.931808
Trial 1	M1-2	C-P	M	0:04:26.532-0:04:26.798	IT1	0.387661	8	1.45227
Trial 1	M1-2	C-P	M	0:04:26.798-0:04:27.064	IT1	0.174697	8	0.654458
Trial 1	M1-2	C-P	M	0:04:27.064-0:04:27.330	IT1	0.150486	8	0.563755
Trial 1	M1-2	C-P	M	0:04:27.330-0:04:27.596	IT1	0.183782	8	0.688496
Trial 1	M1-2	C-P	M	0:04:27.596-0:04:27.862	IT1	0.214463	8	0.803438
Trial 1	M1-2	C-P	M	0:04:27.862-0:04:28.128	IT1	0.167651	8	0.628058
Trial 1	M1-2	C-P	M	0:04:28.128-0:04:28.394	IT1	0.150712	8	0.564607
Trial 1	M1-2	C-P	M	0:04:28.394-0:04:28.660	IT1	0.0758683	8	0.28422
Trial 1	M1-2	C-P	M	0:04:28.660-0:04:28.926	IT1	0.0827686	8	0.31007
Trial 1	M1-2	C-P	M	0:04:28.926-0:04:29.192	IT1	0.286253	8	1.07239
Trial 1	M1-2	C-P	M	0:04:29.192-0:04:29.458	IT1	0.206985	8	0.77541
Trial 1	M1-2	C-P	M	0:04:29.458-0:04:29.724	IT1	0.0888669	8	0.332916
Trial 1	M1-2	C-P	M	0:04:29.724-0:04:29.990	IT1	0.101239	8	0.379271
Trial 1	M1-2	C-P	M	0:04:29.990-0:04:30.256	CS2a	0.0939406	8	0.351923
Trial 1	M1-2	C-P	M	0:04:30.256-0:04:30.522	CS2a	0.176127	8	0.659814
Trial 1	M1-2	C-P	M	0:04:30.522-0:04:30.788	CS2a	0.0661988	8	0.247999
Trial 1	M1-2	C-P	M	0:04:30.788-0:04:31.054	CS2a	0.156925	8	0.587878
Trial 1	M1-2	C-P	M	0:04:31.054-0:04:31.320	CS2a	0.0954621	8	0.357628
Trial 1	M1-2	C-P	M	0:04:31.320-0:04:31.586	CS2a	0.0892175	8	0.334228
Trial 1	M1-2	C-P	M	0:04:31.586-0:04:31.852	CS2a	0.0293461	8	0.109938
Trial 1	M1-2	C-P	M	0:04:31.852-0:04:32.118	CS2a	0.0469878	8	0.176028
Trial 1	M1-2	C-P	M	0:04:32.118-0:04:32.384	CS2a	0.120827	8	0.45265
Trial 1	M1-2	C-P	M	0:04:32.384-0:04:32.650	CS2a	0.12976	8	0.486112
Trial 1	M1-2	C-P	M	0:04:32.650-0:04:32.916	CS2a	0.104933	8	0.393105
Trial 1	M1-2	C-P	M	0:04:32.916-0:04:33.182	CS2a	0.0566706	8	0.212303
Trial 1	M1-2	C-P	M	0:04:33.182-0:04:33.448	CS2a	0.128642	8	0.48192
Trial 1	M1-2	C-P	M	0:04:33.448-0:04:33.714	CS2a	0.0632093	8	0.236796
Trial 1	M1-2	C-P	M	0:04:33.714-0:04:33.980	CS2a	0.116258	8	0.435533
Trial 1	M1-2	C-P	M	0:04:33.980-0:04:34.246	CS2a	0.0681	8	0.255119
Trial 1	M1-2	C-P	M	0:04:34.246-0:04:34.512	CS2a	0.159957	8	0.599237
Trial 1	M1-2	C-P	M	0:04:34.512-0:04:34.778	CS2a	0.228081	8	0.854446
Trial 1	M1-2	C-P	M	0:04:34.778-0:04:35.044	CS2a	0.12885	8	0.482702
Trial 1	M1-2	C-P	M	0:04:35.044-0:04:35.310	CS2a	0.183156	8	0.686155
Trial 1	M1-2	C-P	M	0:04:35.310-0:04:35.576	CS2a	0.109592	8	0.410558
Trial 1	M1-2	C-P	M	0:04:35.576-0:04:35.842	CS2a	0.163591	7	0.700399
Trial 1	M1-2	C-P	M	0:04:35.842-0:04:36.108	CS2a	0.380663	8	1.42606
Trial 1	M1-2	C-P	M	0:04:36.108-0:04:36.374	CS2a	0.180931	8	0.67781
Trial 1	M1-2	C-P	M	0:04:36.374-0:04:36.640	CS2a	0.241009	8	0.902877
Trial 1	M1-2	C-P	M	0:04:36.640-0:04:36.906	CS2a	0.421164	8	1.57778
Trial 1	M1-2	C-P	M	0:04:36.906-0:04:37.172	CS2a	1.56563	8	5.86522
Trial 1	M1-2	C-P	M	0:04:37.172-0:04:37.438	CS2a	0.704884	8	2.64069
Trial 1	M1-2	C-P	M	0:04:37.438-0:04:37.704	CS2a	0.962421	8	3.60546
Trial 1	M1-2	C-P	M	0:04:37.704-0:04:37.970	CS2a	0.700102	8	2.62276
Trial 1	M1-2	C-P	M	0:04:37.970-0:04:38.236	CS2a	0.561381	8	2.10309
Trial 1	M1-2	C-P	M	0:04:38.236-0:04:38.502	CS2a	1.19669	8	4.48308
Trial 1	M1-2	C-P	M	0:04:38.502-0:04:38.768	CS2a	1.21975	8	4.56951
Trial 1	M1-2	C-P	M	0:04:38.768-0:04:39.034	CS2a	2.44554	8	9.16159
Trial 1	M1-2	C-P	M	0:04:39.034-0:04:39.300	CS2a	2.91269	8	10.9116
Trial 1	M1-2	C-P	M	0:04:39.300-0:04:39.566	CS2a	3.99874	8	14.9803
Trial 1	M1-2	C-P	M	0:04:39.566-0:04:39.832	CS2a	3.58053	8	13.4135
Trial 1	M1-2	C-P	M	0:04:39.832-0:04:40.098	CS2b	1.26213	8	4.72827
Trial 1	M1-2	C-P	M	0:04:40.098-0:04:40.364	CS2b	0.952881	8	3.56973
Trial 1	M1-2	C-P	M	0:04:40.364-0:04:40.630	CS2b	0.468484	8	1.75506
Trial 1	M1-2	C-P	M	0:04:40.630-0:04:40.896	CS2b	0.21611	8	0.8096
Trial 1	M1-2	C-P	M	0:04:40.896-0:04:41.162	CS2b	0.208974	8	0.782872
Trial 1	M1-2	C-P	M	0:04:41.162-0:04:41.428	CS2b	0.214595	8	0.803932
Trial 1	M1-2	C-P	M	0:04:41.428-0:04:41.694	CS2b	0.24391	8	0.913746
Trial 1	M1-2	C-P	M	0:04:41.694-0:04:41.960	CS2b	0.409883	8	1.53553
Trial 1	M1-2	C-P	M	0:04:41.960-0:04:42.226	CS2b	0.172907	8	0.647751
Trial 1	M1-2	C-P	M	0:04:42.226-0:04:42.492	CS2b	0.159719	8	0.598345
Trial 1	M1-2	C-P	M	0:04:42.492-0:04:42.758	CS2b	0.147448	8	0.552378
Trial 1	M1-2	C-P	M	0:04:42.758-0:04:43.024	CS2b	2.40081	8	8.99401
Trial 1	M1-2	C-P	M	0:04:43.024-0:04:43.290	CS2b	12.6801	8	47.5028
Trial 1	M1-2	C-P	M	0:04:43.290-0:04:43.556	CS2b	5.31892	8	19.9261
Trial 1	M1-2	C-P	M	0:04:43.556-0:04:43.822	CS2b	1.48878	8	5.57732
Trial 1	M1-2	C-P	M	0:04:43.822-0:04:44.088	CS2b	0.777131	8	2.91134
Trial 1	M1-2	C-P	M	0:04:44.088-0:04:44.354	CS2b	0.346829	8	1.29931
Trial 1	M1-2	C-P	M	0:04:44.354-0:04:44.620	CS2b	0.227593	8	0.852617
Trial 1	M1-2	C-P	M	0:04:44.620-0:04:44.886	CS2b	0.161612	8	0.605441
Trial 1	M1-2	C-P	M	0:04:44.886-0:04:45.152	CS2b	0.0898825	8	0.336721
Trial 1	M1-2	C-P	M	0:04:45.152-0:04:45.418	CS2b	0.0723104	7	0.309593
Trial 1	M1-2	C-P	M	0:04:45.418-0:04:45.684	CS2b	0.102877	8	0.385402
Trial 1	M1-2	C-P	M	0:04:45.684-0:04:45.950	CS2b	0.983605	8	3.68482
Trial 1	M1-2	C-P	M	0:04:45.950-0:04:46.216	CS2b	9.84939	8	36.8984
Trial 1	M1-2	C-P	M	0:04:46.216-0:04:46.482	CS2b	7.46243	8	27.956
Trial 1	M1-2	C-P	M	0:04:46.482-0:04:46.748	CS2b	3.98197	8	14.9174
Trial 1	M1-2	C-P	M	0:04:46.748-0:04:47.014	CS2b	1.3088	8	4.90308
Trial 1	M1-2	C-P	M	0:04:47.014-0:04:47.280	CS2b	1.10825	8	4.15176
Trial 1	M1-2	C-P	M	0:04:47.280-0:04:47.546	CS2b	0.510584	8	1.91278
Trial 1	M1-2	C-P	M	0:04:47.546-0:04:47.812	CS2b	0.395312	8	1.48093
Trial 1	M1-2	C-P	M	0:04:47.812-0:04:48.078	CS2b	0.274269	8	1.02748
Trial 1	M1-2	C-P	M	0:04:48.078-0:04:48.344	CS2b	0.36207	8	1.35641
Trial 1	M1-2	C-P	M	0:04:48.344-0:04:48.610	CS2b	0.168755	8	0.632195
Trial 1	M1-2	C-P	M	0:04:48.610-0:04:48.876	CS2b	0.127944	8	0.479311
Trial 1	M1-2	C-P	M	0:04:48.876-0:04:49.142	CS2b	0.176547	8	0.66139
Trial 1	M1-2	C-P	M	0:04:49.142-0:04:49.408	CS2b	0.102063	8	0.382352
Trial 1	M1-2	C-P	M	0:04:49.408-0:04:49.674	CS2b	0.301564	8	1.12973
Trial 1	M1-2	C-P	M	0:04:49.674-0:04:49.940	CS2b	0.10296	8	0.385711
Trial 1	M1-2	C-P	M	0:04:49.940-0:04:50.206	CS2b	0.254863	8	0.954788
Trial 1	M1-2	C-P	M	0:04:50.206-0:04:50.472	IT2	0.129125	8	0.483735
Trial 1	M1-2	C-P	M	0:04:50.472-0:04:50.738	IT2	0.220565	8	0.826291
Trial 1	M1-2	C-P	M	0:04:50.738-0:04:51.004	IT2	0.206257	8	0.77269
Trial 1	M1-2	C-P	M	0:04:51.004-0:04:51.270	IT2	0.132869	8	0.497762
Trial 1	M1-2	C-P	M	0:04:51.270-0:04:51.536	IT2	0.170657	8	0.639319
Trial 1	M1-2	C-P	M	0:04:51.536-0:04:51.802	IT2	0.16379	8	0.613596
Trial 1	M1-2	C-P	M	0:04:51.802-0:04:52.068	IT2	0.152367	8	0.570801
Trial 1	M1-2	C-P	M	0:04:52.068-0:04:52.334	IT2	0.110243	8	0.412998
Trial 1	M1-2	C-P	M	0:04:52.334-0:04:52.600	IT2	0.205405	8	0.769495
Trial 1	M1-2	C-P	M	0:04:52.600-0:04:52.866	IT2	0.0693642	8	0.259855
Trial 1	M1-2	C-P	M	0:04:52.866-0:04:53.132	IT2	0.156318	8	0.585609
Trial 1	M1-2	C-P	M	0:04:53.132-0:04:53.398	IT2	0.194922	8	0.730228
Trial 1	M1-2	C-P	M	0:04:53.398-0:04:53.664	IT2	0.0937202	8	0.351099
Trial 1	M1-2	C-P	M	0:04:53.664-0:04:53.930	IT2	0.189769	8	0.710922
Trial 1	M1-2	C-P	M	0:04:53.930-0:04:54.196	IT2	0.169086	8	0.633444
Trial 1	M1-2	C-P	M	0:04:54.196-0:04:54.462	IT2	0.22664	8	0.849047
Trial 1	M1-2	C-P	M	0:04:54.462-0:04:54.728	IT2	0.0369784	7	0.15832
Trial 1	M1-2	C-P	M	0:04:54.728-0:04:54.994	IT2	0.204235	8	0.765112
Trial 1	M1-2	C-P	M	0:04:54.994-0:04:55.260	IT2	0.15435	8	0.578237
Trial 1	M1-2	C-P	M	0:04:55.260-0:04:55.526	IT2	0.124789	8	0.467485
Trial 1	M1-2	C-P	M	0:04:55.526-0:04:55.792	IT2	0.12598	8	0.471951
Trial 1	M1-2	C-P	M	0:04:55.792-0:04:56.058	IT2	0.0756227	8	0.283301
Trial 1	M1-2	C-P	M	0:04:56.058-0:04:56.324	IT2	0.263725	8	0.987979
Trial 1	M1-2	C-P	M	0:04:56.324-0:04:56.590	IT2	0.151967	8	0.569307
Trial 1	M1-2	C-P	M	0:04:56.590-0:04:56.856	IT2	0.251941	8	0.943833
Trial 1	M1-2	C-P	M	0:04:56.856-0:04:57.122	IT2	0.0900688	8	0.337421
Trial 1	M1-2	C-P	M	0:04:57.122-0:04:57.388	IT2	0.117072	8	0.438584
Trial 1	M1-2	C-P	M	0:04:57.388-0:04:57.654	IT2	0.0922901	8	0.34574
Trial 1	M1-2	C-P	M	0:04:57.654-0:04:57.920	IT2	0.0963313	8	0.36088
Trial 1	M1-2	C-P	M	0:04:57.920-0:04:58.186	IT2	0.196201	8	0.735017
Trial 1	M1-2	C-P	M	0:04:58.186-0:04:58.452	IT2	0.156216	8	0.585224
Trial 1	M1-2	C-P	M	0:04:58.452-0:04:58.718	IT2	0.0911954	8	0.341639
Trial 1	M1-2	C-P	M	0:04:58.718-0:04:58.984	IT2	0.0536926	8	0.201147
Trial 1	M1-2	C-P	M	0:04:58.984-0:04:59.250	IT2	0.313865	8	1.17583
Trial 1	M1-2	C-P	M	0:04:59.250-0:04:59.516	IT2	0.0849476	8	0.318238
Trial 1	M1-2	C-P	M	0:04:59.516-0:04:59.782	IT2	0.181725	8	0.680792
Trial 1	M1-2	C-P	M	0:04:59.782-0:05:00.048	IT2	0.218926	8	0.820158
Trial 1	M1-2	C-P	M	0:05:00.048-0:05:00.314	IT2	0.134878	8	0.505289
Trial 1	M1-2	C-P	M	0:05:00.314-0:05:00.580	IT2	0.135648	8	0.508171
Trial 1	M1-2	C-P	M	0:05:00.580-0:05:00.846	IT2	0.0956252	8	0.358233
Trial 1	M1-2	C-P	M	0:05:00.846-0:05:01.112	IT2	0.0612422	8	0.229429
Trial 1	M1-2	C-P	M	0:05:01.112-0:05:01.378	IT2	0.0830947	8	0.311295
Trial 1	M1-2	C-P	M	0:05:01.378-0:05:01.644	IT2	0.170064	8	0.637097
Trial 1	M1-2	C-P	M	0:05:01.644-0:05:01.910	IT2	0.0761053	8	0.285111
Trial 1	M1-2	C-P	M	0:05:01.910-0:05:02.176	IT2	0.233796	8	0.875856
Trial 1	M1-2	C-P	M	0:05:02.176-0:05:02.442	IT2	0.206926	8	0.7752
Trial 1	M1-2	C-P	M	0:05:02.442-0:05:02.708	IT2	0.133453	8	0.499947
Trial 1	M1-2	C-P	M	0:05:02.708-0:05:02.974	IT2	0.155141	8	0.581203
Trial 1	M1-2	C-P	M	0:05:02.974-0:05:03.240	IT2	0.230726	8	0.864368
Trial 1	M1-2	C-P	M	0:05:03.240-0:05:03.506	IT2	0.187839	8	0.70369
Trial 1	M1-2	C-P	M	0:05:03.506-0:05:03.772	IT2	0.088746	8	0.332467
Trial 1	M1-2	C-P	M	0:05:03.772-0:05:04.038	IT2	0.131378	8	0.492172
Trial 1	M1-2	C-P	M	0:05:04.038-0:05:04.304	IT2	0.0693214	7	0.296795
Trial 1	M1-2	C-P	M	0:05:04.304-0:05:04.570	IT2	0.0618429	8	0.231679
Trial 1	M1-2	C-P	M	0:05:04.570-0:05:04.836	IT2	0.0895557	8	0.335498
Trial 1	M1-2	C-P	M	0:05:04.836-0:05:05.102	IT2	0.153503	8	0.575061
Trial 1	M1-2	C-P	M	0:05:05.102-0:05:05.368	IT2	0.142841	8	0.535124
Trial 1	M1-2	C-P	M	0:05:05.368-0:05:05.634	IT2	0.0797832	8	0.298888
Trial 1	M1-2	C-P	M	0:05:05.634-0:05:05.900	IT2	0.152133	8	0.569929
Trial 1	M1-2	C-P	M	0:05:05.900-0:05:06.166	IT2	0.0435352	8	0.163093
Trial 1	M1-2	C-P	M	0:05:06.166-0:05:06.432	IT2	0.0910221	8	0.340989
Trial 1	M1-2	C-P	M	0:05:06.432-0:05:06.698	IT2	0.117638	8	0.440703
Trial 1	M1-2	C-P	M	0:05:06.698-0:05:06.964	IT2	0.0667128	8	0.249923
Trial 1	M1-2	C-P	M	0:05:06.964-0:05:07.230	IT2	0.185485	8	0.694885
Trial 1	M1-2	C-P	M	0:05:07.230-0:05:07.496	IT2	0.148139	8	0.554965
Trial 1	M1-2	C-P	M	0:05:07.496-0:05:07.762	IT2	0.2605	8	0.975897
Trial 1	M1-2	C-P	M	0:05:07.762-0:05:08.028	IT2	0.188073	8	0.704566
Trial 1	M1-2	C-P	M	0:05:08.028-0:05:08.294	IT2	0.120528	8	0.451526
Trial 1	M1-2	C-P	M	0:05:08.294-0:05:08.560	IT2	0.182165	8	0.682436
Trial 1	M1-2	C-P	M	0:05:08.560-0:05:08.826	IT2	0.150724	8	0.564649
Trial 1	M1-2	C-P	M	0:05:08.826-0:05:09.092	IT2	0.0458745	8	0.171858
Trial 1	M1-2	C-P	M	0:05:09.092-0:05:09.358	IT2	0.14069	8	0.527057
Trial 1	M1-2	C-P	M	0:05:09.358-0:05:09.624	IT2	0.0467691	8	0.175209
Trial 1	M1-2	C-P	M	0:05:09.624-0:05:09.890	IT2	0.227487	8	0.852228
Trial 1	M1-2	C-P	M	0:05:09.890-0:05:10.156	IT2	0.192265	8	0.720274
Trial 1	M1-2	C-P	M	0:05:10.156-0:05:10.422	IT2	0.390434	8	1.46265
Trial 1	M1-2	C-P	M	0:05:10.422-0:05:10.688	IT2	0.41086	8	1.53919
Trial 1	M1-2	C-P	M	0:05:10.688-0:05:10.954	IT2	0.176561	8	0.661437
Trial 1	M1-2	C-P	M	0:05:10.954-0:05:11.220	IT2	0.316885	8	1.18713
Trial 1	M1-2	C-P	M	0:05:11.220-0:05:11.486	IT2	0.342263	8	1.2822
Trial 1	M1-2	C-P	M	0:05:11.486-0:05:11.752	IT2	0.270322	8	1.01269
Trial 1	M1-2	C-P	M	0:05:11.752-0:05:12.018	IT2	0.262996	8	0.985248
Trial 1	M1-2	C-P	M	0:05:12.018-0:05:12.284	IT2	0.157307	8	0.589308
Trial 1	M1-2	C-P	M	0:05:12.284-0:05:12.550	IT2	0.236878	8	0.887405
Trial 1	M1-2	C-P	M	0:05:12.550-0:05:12.816	IT2	0.0705368	8	0.264247
Trial 1	M1-2	C-P	M	0:05:12.816-0:05:13.082	IT2	0.0958515	8	0.359082
Trial 1	M1-2	C-P	M	0:05:13.082-0:05:13.348	IT2	0.0374748	8	0.14039
Trial 1	M1-2	C-P	M	0:05:13.348-0:05:13.614	IT2	0.139639	8	0.523124
Trial 1	M1-2	C-P	M	0:05:13.614-0:05:13.880	IT2	0.0537187	7	0.229992
Trial 1	M1-2	C-P	M	0:05:13.880-0:05:14.146	IT2	0.0905059	8	0.339056
Trial 1	M1-2	C-P	M	0:05:14.146-0:05:14.412	IT2	0.0534686	8	0.200306
Trial 1	M1-2	C-P	M	0:05:14.412-0:05:14.678	IT2	0.0549546	8	0.205876
Trial 1	M1-2	C-P	M	0:05:14.678-0:05:14.944	IT2	0.151206	8	0.566456
Trial 1	M1-2	C-P	M	0:05:14.944-0:05:15.210	IT2	0.122703	8	0.459675
Trial 1	M1-2	C-P	M	0:05:15.210-0:05:15.476	IT2	0.18784	8	0.703695
Trial 1	M1-2	C-P	M	0:05:15.476-0:05:15.742	IT2	0.0664049	8	0.248768
Trial 1	M1-2	C-P	M	0:05:15.742-0:05:16.008	IT2	0.304468	8	1.14061
Trial 1	M1-2	C-P	M	0:05:16.008-0:05:16.274	IT2	0.139553	8	0.522802
Trial 1	M1-2	C-P	M	0:05:16.274-0:05:16.540	IT2	0.174187	8	0.652547
Trial 1	M1-2	C-P	M	0:05:16.540-0:05:16.806	IT2	0.113471	8	0.425088
Trial 1	M1-2	C-P	M	0:05:16.806-0:05:17.072	IT2	0.0960267	8	0.359738
Trial 1	M1-2	C-P	M	0:05:17.072-0:05:17.338	IT2	0.302468	8	1.13313
Trial 1	M1-2	C-P	M	0:05:17.338-0:05:17.604	IT2	0.0929587	8	0.348249
Trial 1	M1-2	C-P	M	0:05:17.604-0:05:17.870	IT2	0.104826	8	0.392703
Trial 1	M1-2	C-P	M	0:05:17.870-0:05:18.136	IT2	0.0635028	8	0.237897
Trial 1	M1-2	C-P	M	0:05:18.136-0:05:18.402	IT2	0.159792	8	0.598618
Trial 1	M1-2	C-P	M	0:05:18.402-0:05:18.668	IT2	0.107855	8	0.40405
Trial 1	M1-2	C-P	M	0:05:18.668-0:05:18.934	IT2	0.411607	8	1.54198
Trial 1	M1-2	C-P	M	0:05:18.934-0:05:19.200	IT2	0.259256	8	0.971229
Trial 1	M1-2	C-P	M	0:05:19.200-0:05:19.466	IT2	0.41472	8	1.55363
Trial 1	M1-2	C-P	M	0:05:19.466-0:05:19.732	IT2	0.197704	8	0.74065
Trial 1	M1-2	C-P	M	0:05:19.732-0:05:19.998	IT2	0.241626	8	0.905201
Trial 1	M1-2	C-P	M	0:05:19.998-0:05:20.264	IT2	0.265242	8	0.993676
Trial 1	M1-2	C-P	M	0:05:20.264-0:05:20.530	IT2	0.17766	8	0.665557
Trial 1	M1-2	C-P	M	0:05:20.530-0:05:20.796	IT2	0.292418	8	1.09548
Trial 1	M1-2	C-P	M	0:05:20.796-0:05:21.062	IT2	0.346317	8	1.29739
Trial 1	M1-2	C-P	M	0:05:21.062-0:05:21.328	IT2	0.452921	8	1.69675
Trial 1	M1-2	C-P	M	0:05:21.328-0:05:21.594	IT2	0.265991	8	0.996478
Trial 1	M1-2	C-P	M	0:05:21.594-0:05:21.860	IT2	0.119664	8	0.448291
Trial 1	M1-2	C-P	M	0:05:21.860-0:05:22.126	IT2	0.337361	8	1.26383
Trial 1	M1-2	C-P	M	0:05:22.126-0:05:22.392	IT2	0.133855	8	0.50145
Trial 1	M1-2	C-P	M	0:05:22.392-0:05:22.658	IT2	0.392488	8	1.47035
Trial 1	M1-2	C-P	M	0:05:22.658-0:05:22.924	IT2	0.0481701	8	0.18046
Trial 1	M1-2	C-P	M	0:05:22.924-0:05:23.190	IT2	0.245429	8	0.91944
Trial 1	M1-2	C-P	M	0:05:23.190-0:05:23.456	IT2	0.0764223	7	0.327197
Trial 1	M1-2	C-P	M	0:05:23.456-0:05:23.722	IT2	0.0863131	8	0.323351
Trial 1	M1-2	C-P	M	0:05:23.722-0:05:23.988	IT2	0.123834	8	0.463915
Trial 1	M1-2	C-P	M	0:05:23.988-0:05:24.254	IT2	0.0706978	8	0.264851
Trial 1	M1-2	C-P	M	0:05:24.254-0:05:24.520	IT2	0.373981	8	1.40102
Trial 1	M1-2	C-P	M	0:05:24.520-0:05:24.786	IT2	0.12276	8	0.459885
Trial 1	M1-2	C-P	M	0:05:24.786-0:05:25.052	IT2	0.384928	8	1.44203
Trial 1	M1-2	C-P	M	0:05:25.052-0:05:25.318	IT2	0.225733	8	0.845646
Trial 1	M1-2	C-P	M	0:05:25.318-0:05:25.584	IT2	0.471516	8	1.76642
Trial 1	M1-2	C-P	M	0:05:25.584-0:05:25.850	IT2	0.530092	8	1.98585
Trial 1	M1-2	C-P	M	0:05:25.850-0:05:26.116	IT2	0.177086	8	0.663406
Trial 1	M1-2	C-P	M	0:05:26.116-0:05:26.382	IT2	0.235395	8	0.881846
Trial 1	M1-2	C-P	M	0:05:26.382-0:05:26.648	IT2	0.139199	8	0.521471
Trial 1	M1-2	C-P	M	0:05:26.648-0:05:26.914	IT2	0.203684	8	0.763055
Trial 1	M1-2	C-P	M	0:05:26.914-0:05:27.180	IT2	0.271694	8	1.01783
Trial 1	M1-2	C-P	M	0:05:27.180-0:05:27.446	IT2	0.236774	8	0.887013
Trial 1	M1-2	C-P	M	0:05:27.446-0:05:27.712	IT2	0.509098	8	1.90721
Trial 1	M1-2	C-P	M	0:05:27.712-0:05:27.978	IT2	0.315137	8	1.18058
Trial 1	M1-2	C-P	M	0:05:27.978-0:05:28.244	IT2	0.367713	8	1.37754
Trial 1	M1-2	C-P	M	0:05:28.244-0:05:28.510	IT2	0.198567	8	0.74388
Trial 1	M1-2	C-P	M	0:05:28.510-0:05:28.776	IT2	0.232829	8	0.872235
Trial 1	M1-2	C-P	M	0:05:28.776-0:05:29.042	IT2	0.0569909	8	0.213504
Trial 1	M1-2	C-P	M	0:05:29.042-0:05:29.308	IT2	0.232479	8	0.870932
Trial 1	M1-2	C-P	M	0:05:29.308-0:05:29.574	IT2	0.209156	8	0.783555
Trial 1	M1-2	C-P	M	0:05:29.574-0:05:29.840	IT2	0.163765	8	0.613506
Trial 1	M1-2	C-P	M	0:05:29.840-0:05:30.106	IT2	0.224331	8	0.840399
Trial 1	M1-2	C-P	M	0:05:30.106-0:05:30.372	IT2	0.342033	8	1.28134
Trial 1	M1-2	C-P	M	0:05:30.372-0:05:30.638	IT2	0.23838	8	0.893028
Trial 1	M1-2	C-P	M	0:05:30.638-0:05:30.904	IT2	0.355502	8	1.3318
Trial 1	M1-2	C-P	M	0:05:30.904-0:05:31.170	IT2	0.378841	8	1.41923
Trial 1	M1-2	C-P	M	0:05:31.170-0:05:31.436	IT2	0.342411	8	1.28277
Trial 1	M1-2	C-P	M	0:05:31.436-0:05:31.702	IT2	0.245123	8	0.918298
Trial 1	M1-2	C-P	M	0:05:31.702-0:05:31.968	IT2	0.20058	8	0.75142
Trial 1	M1-2	C-P	M	0:05:31.968-0:05:32.234	IT2	0.0819683	8	0.307075
Trial 1	M1-2	C-P	M	0:05:32.234-0:05:32.500	IT2	0.0852417	8	0.319336
Trial 1	M1-2	C-P	M	0:05:32.500-0:05:32.766	IT2	0.114407	7	0.48982
Trial 1	M1-2	C-P	M	0:05:32.766-0:05:33.032	IT2	0.122835	8	0.460171
Trial 1	M1-2	C-P	M	0:05:33.032-0:05:33.298	IT2	0.0608038	8	0.227784
Trial 1	M1-2	C-P	M	0:05:33.298-0:05:33.564	IT2	0.145741	8	0.545983
Trial 1	M1-2	C-P	M	0:05:33.564-0:05:33.830	IT2	0.0652826	8	0.244566
Trial 1	M1-2	C-P	M	0:05:33.830-0:05:34.096	IT2	0.135744	8	0.50853
Trial 1	M1-2	C-P	M	0:05:34.096-0:05:34.362	IT2	0.0994608	8	0.372604
Trial 1	M1-2	C-P	M	0:05:34.362-0:05:34.628	IT2	0.154851	8	0.580113
Trial 1	M1-2	C-P	M	0:05:34.628-0:05:34.894	IT2	0.148288	8	0.555526
Trial 1	M1-2	C-P	M	0:05:34.894-0:05:35.160	IT2	0.10832	8	0.405794
Trial 1	M1-2	C-P	M	0:05:35.160-0:05:35.426	IT2	0.120541	8	0.451575
Trial 1	M1-2	C-P	M	0:05:35.426-0:05:35.692	IT2	0.0689629	8	0.258352
Trial 1	M1-2	C-P	M	0:05:35.692-0:05:35.958	IT2	0.172822	8	0.647438
Trial 1	M1-2	C-P	M	0:05:35.958-0:05:36.224	IT2	0.287307	8	1.07632
Trial 1	M1-2	C-P	M	0:05:36.224-0:05:36.490	IT2	0.223644	8	0.837822
Trial 1	M1-2	C-P	M	0:05:36.490-0:05:36.756	IT2	0.189396	8	0.709522
Trial 1	M1-2	C-P	M	0:05:36.756-0:05:37.022	IT2	0.0984654	8	0.368874
Trial 1	M1-2	C-P	M	0:05:37.022-0:05:37.288	IT2	0.138396	8	0.518471
Trial 1	M1-2	C-P	M	0:05:37.288-0:05:37.554	IT2	0.129593	8	0.485486
Trial 1	M1-2	C-P	M	0:05:37.554-0:05:37.820	IT2	0.107409	8	0.402384
Trial 1	M1-2	C-P	M	0:05:37.820-0:05:38.086	IT2	0.0818393	8	0.306589
Trial 1	M1-2	C-P	M	0:05:38.086-0:05:38.352	IT2	0.134899	8	0.505366
Trial 1	M1-2	C-P	M	0:05:38.352-0:05:38.618	IT2	0.0781136	8	0.292635
Trial 1	M1-2	C-P	M	0:05:38.618-0:05:38.884	IT2	0.119228	8	0.446661
Trial 1	M1-2	C-P	M	0:05:38.884-0:05:39.150	IT2	0.0594158	8	0.222588
Trial 1	M1-2	C-P	M	0:05:39.150-0:05:39.416	IT2	0.154846	8	0.58009
Trial 1	M1-2	C-P	M	0:05:39.416-0:05:39.682	IT2	0.0521752	8	0.195461
Trial 1	M1-2	C-P	M	0:05:39.682-0:05:39.948	IT2	0.150053	8	0.562135
Trial 1	M1-2	C-P	M	0:05:39.948-0:05:40.214	IT2	0.125451	8	0.46997
Trial 1	M1-2	C-P	M	0:05:40.214-0:05:40.480	IT2	0.106072	8	0.397373
Trial 1	M1-2	C-P	M	0:05:40.480-0:05:40.746	IT2	0.114566	8	0.429194
Trial 1	M1-2	C-P	M	0:05:40.746-0:05:41.012	IT2	0.0964175	8	0.361202
Trial 1	M1-2	C-P	M	0:05:41.012-0:05:41.278	IT2	0.184662	8	0.691796
Trial 1	M1-2	C-P	M	0:05:41.278-0:05:41.544	IT2	0.147743	8	0.553476
Trial 1	M1-2	C-P	M	0:05:41.544-0:05:41.810	IT2	0.182467	8	0.683571
Trial 1	M1-2	C-P	M	0:05:41.810-0:05:42.076	IT2	0.0765141	8	0.286645
Trial 1	M1-2	C-P	M	0:05:42.076-0:05:42.342	IT2	0.077358	7	0.331205
Trial 1	M1-2	C-P	M	0:05:42.342-0:05:42.608	IT2	0.136737	8	0.512246
Trial 1	M1-2	C-P	M	0:05:42.608-0:05:42.874	IT2	0.160732	8	0.60214
Trial 1	M1-2	C-P	M	0:05:42.874-0:05:43.140	IT2	0.261963	8	0.981371
Trial 1	M1-2	C-P	M	0:05:43.140-0:05:43.406	IT2	0.134877	8	0.505281
Trial 1	M1-2	C-P	M	0:05:43.406-0:05:43.672	IT2	0.175559	8	0.657682
Trial 1	M1-2	C-P	M	0:05:43.672-0:05:43.938	IT2	0.116885	8	0.437882
Trial 1	M1-2	C-P	M	0:05:43.938-0:05:44.204	IT2	0.143891	8	0.539056
Trial 1	M1-2	C-P	M	0:05:44.204-0:05:44.470	IT2	0.186519	8	0.698743
Trial 1	M1-2	C-P	M	0:05:44.470-0:05:44.736	IT2	0.04948	8	0.185368
Trial 1	M1-2	C-P	M	0:05:44.736-0:05:45.002	IT2	0.189074	8	0.70832
Trial 1	M1-2	C-P	M	0:05:45.002-0:05:45.268	IT2	0.152705	8	0.57208
Trial 1	M1-2	C-P	M	0:05:45.268-0:05:45.534	IT2	0.177178	8	0.663755
Trial 1	M1-2	C-P	M	0:05:45.534-0:05:45.800	IT2	0.108142	8	0.405128
Trial 1	M1-2	C-P	M	0:05:45.800-0:05:46.066	IT2	0.130893	8	0.490359
Trial 1	M1-2	C-P	M	0:05:46.066-0:05:46.332	IT2	0.0938269	8	0.351497
Trial 1	M1-2	C-P	M	0:05:46.332-0:05:46.598	IT2	0.180076	8	0.674614
Trial 1	M1-2	C-P	M	0:05:46.598-0:05:46.864	IT2	0.162027	8	0.606992
Trial 1	M1-2	C-P	M	0:05:46.864-0:05:47.130	IT2	0.118118	8	0.4425
Trial 1	M1-2	C-P	M	0:05:47.130-0:05:47.396	IT2	0.188996	8	0.708032
Trial 1	M1-2	C-P	M	0:05:47.396-0:05:47.662	IT2	0.0684801	8	0.256542
Trial 1	M1-2	C-P	M	0:05:47.662-0:05:47.928	IT2	0.110216	8	0.4129
Trial 1	M1-2	C-P	M	0:05:47.928-0:05:48.194	IT2	0.16927	8	0.634127
Trial 1	M1-2	C-P	M	0:05:48.194-0:05:48.460	IT2	0.130801	8	0.490008
Trial 1	M1-2	C-P	M	0:05:48.460-0:05:48.726	IT2	0.0931675	8	0.349031
Trial 1	M1-2	C-P	M	0:05:48.726-0:05:48.992	IT2	0.197646	8	0.740427
Trial 1	M1-2	C-P	M	0:05:48.992-0:05:49.258	IT2	0.157522	8	0.590113
Trial 1	M1-2	C-P	M	0:05:49.258-0:05:49.524	IT2	0.0988365	8	0.370267
Trial 1	M1-2	C-P	M	0:05:49.524-0:05:49.790	IT2	0.0830737	8	0.311215
Trial 1	M1-2	C-P	M	0:05:49.790-0:05:50.056	IT2	0.0499128	8	0.186988
Trial 1	M1-2	C-P	M	0:05:50.056-0:05:50.322	IT2	0.0823801	8	0.308617
Trial 1	M1-2	C-P	M	0:05:50.322-0:05:50.588	IT2	0.0938953	8	0.351756
Trial 1	M1-2	C-P	M	0:05:50.588-0:05:50.854	IT2	0.140408	8	0.526003
Trial 1	M1-2	C-P	M	0:05:50.854-0:05:51.120	IT2	0.0806373	8	0.302086
Trial 1	M1-2	C-P	M	0:05:51.120-0:05:51.386	IT2	0.138455	8	0.518688
Trial 1	M1-2	C-P	M	0:05:51.386-0:05:51.652	IT2	0.073178	8	0.274143
Trial 1	M1-2	C-P	M	0:05:51.652-0:05:51.918	IT2	0.0685329	7	0.29342
Trial 1	M1-2	C-P	M	0:05:51.918-0:05:52.184	IT2	0.149262	8	0.559173
Trial 1	M1-2	C-P	M	0:05:52.184-0:05:52.450	IT2	0.126792	8	0.474991
Trial 1	M1-2	C-P	M	0:05:52.450-0:05:52.716	IT2	0.246675	8	0.924103
Trial 1	M1-2	C-P	M	0:05:52.716-0:05:52.982	IT2	0.031671	8	0.118648
Trial 1	M1-2	C-P	M	0:05:52.982-0:05:53.248	IT2	0.162641	8	0.609295
Trial 1	M1-2	C-P	M	0:05:53.248-0:05:53.514	IT2	0.176332	8	0.660591
Trial 1	M1-2	C-P	M	0:05:53.514-0:05:53.780	IT2	0.121972	8	0.456937
Trial 1	M1-2	C-P	M	0:05:53.780-0:05:54.046	IT2	0.0873919	8	0.327391
Trial 1	M1-2	C-P	M	0:05:54.046-0:05:54.312	IT2	0.108299	8	0.405718
Trial 1	M1-2	C-P	M	0:05:54.312-0:05:54.578	IT2	0.11723	8	0.439168
Trial 1	M1-2	C-P	M	0:05:54.578-0:05:54.844	IT2	0.113126	8	0.423799
Trial 1	M1-2	C-P	M	0:05:54.844-0:05:55.110	IT2	0.16707	8	0.625884
Trial 1	M1-2	C-P	M	0:05:55.110-0:05:55.376	IT2	0.111518	8	0.417778
Trial 1	M1-2	C-P	M	0:05:55.376-0:05:55.642	IT2	0.134815	8	0.505051
Trial 1	M1-2	C-P	M	0:05:55.642-0:05:55.908	IT2	0.104078	8	0.389898
Trial 1	M1-2	C-P	M	0:05:55.908-0:05:56.174	IT2	0.141648	8	0.530653
Trial 1	M1-2	C-P	M	0:05:56.174-0:05:56.440	IT2	0.187586	8	0.702744
Trial 1	M1-2	C-P	M	0:05:56.440-0:05:56.706	IT2	0.0462328	8	0.173199
Trial 1	M1-2	C-P	M	0:05:56.706-0:05:56.972	IT2	0.0936383	8	0.350794
Trial 1	M1-2	C-P	M	0:05:56.972-0:05:57.238	IT2	0.103097	8	0.386227
Trial 1	M1-2	C-P	M	0:05:57.238-0:05:57.504	IT2	0.0874377	8	0.327562
Trial 1	M1-2	C-P	M	0:05:57.504-0:05:57.770	IT2	0.173176	8	0.648759
Trial 1	M1-2	C-P	M	0:05:57.770-0:05:58.036	IT2	0.14152	8	0.530166
Trial 1	M1-2	C-P	M	0:05:58.036-0:05:58.302	IT2	0.0273254	8	0.102367
Trial 1	M1-2	C-P	M	0:05:58.302-0:05:58.568	IT2	0.0624901	8	0.234101
Trial 1	M1-2	C-P	M	0:05:58.568-0:05:58.834	IT2	0.077801	8	0.291463
Trial 1	M1-2	C-P	M	0:05:58.834-0:05:59.100	IT2	0.148845	8	0.557609
Trial 1	M1-2	C-P	M	0:05:59.100-0:05:59.366	IT2	0.103746	8	0.388662
Trial 1	M1-2	C-P	M	0:05:59.366-0:05:59.632	IT2	0.118402	8	0.443563
Trial 1	M1-2	C-P	M	0:05:59.632-0:05:59.898	IT2	0.123037	8	0.460929
Trial 1	M1-2	C-P	M	0:05:59.898-0:06:00.164	IT2	0.0898124	8	0.336459
Trial 1	M1-2	C-P	M	0:06:00.164-0:06:00.430	IT2	0.104437	8	0.391249
Trial 1	M1-2	C-P	M	0:06:00.430-0:06:00.696	IT2	0.156823	8	0.587495
Trial 1	M1-2	C-P	M	0:06:00.696-0:06:00.962	IT2	0.123884	8	0.4641
Trial 1	M1-2	C-P	M	0:06:00.962-0:06:01.228	IT2	0.198895	8	0.745108
Trial 1	M1-2	C-P	M	0:06:01.228-0:06:01.494	IT2	0.100287	7	0.429367
Trial 1	M1-2	C-P	M	0:06:01.494-0:06:01.760	IT2	0.0999146	8	0.374303
Trial 1	M1-2	C-P	M	0:06:01.760-0:06:02.026	IT2	0.185441	8	0.694706
Trial 1	M1-2	C-P	M	0:06:02.026-0:06:02.292	IT2	0.190842	8	0.714947
Trial 1	M1-2	C-P	M	0:06:02.292-0:06:02.558	IT2	0.104027	8	0.389708
Trial 1	M1-2	C-P	M	0:06:02.558-0:06:02.824	IT2	0.108158	8	0.405187
Trial 1	M1-2	C-P	M	0:06:02.824-0:06:03.090	IT2	0.0913205	8	0.342116
Trial 1	M1-2	C-P	M	0:06:03.090-0:06:03.356	IT2	0.0264826	8	0.0992101
Trial 1	M1-2	C-P	M	0:06:03.356-0:06:03.622	IT2	0.163477	8	0.612423
Trial 1	M1-2	C-P	M	0:06:03.622-0:06:03.888	IT2	0.0339252	8	0.127092
Trial 1	M1-2	C-P	M	0:06:03.888-0:06:04.154	IT2	0.0972673	8	0.364386
Trial 1	M1-2	C-P	M	0:06:04.154-0:06:04.420	IT2	0.0594585	8	0.222748
Trial 1	M1-2	C-P	M	0:06:04.420-0:06:04.686	IT2	0.154531	8	0.578908
Trial 1	M1-2	C-P	M	0:06:04.686-0:06:04.952	IT2	0.0383825	8	0.14379
Trial 1	M1-2	C-P	M	0:06:04.952-0:06:05.218	IT2	0.163841	8	0.61379
Trial 1	M1-2	C-P	M	0:06:05.218-0:06:05.484	IT2	0.0759652	8	0.284585
Trial 1	M1-2	C-P	M	0:06:05.484-0:06:05.750	IT2	0.0314155	8	0.117692
Trial 1	M1-2	C-P	M	0:06:05.750-0:06:06.016	IT2	0.135633	8	0.508113
Trial 1	M1-2	C-P	M	0:06:06.016-0:06:06.282	IT2	0.129641	8	0.485671
Trial 1	M1-2	C-P	M	0:06:06.282-0:06:06.548	IT2	0.195941	8	0.734038
Trial 1	M1-2	C-P	M	0:06:06.548-0:06:06.814	IT2	0.107295	8	0.401959
Trial 1	M1-2	C-P	M	0:06:06.814-0:06:07.080	IT2	0.109222	8	0.409173
Trial 1	M1-2	C-P	M	0:06:07.080-0:06:07.346	IT2	0.049567	8	0.185689
Trial 1	M1-2	C-P	M	0:06:07.346-0:06:07.612	IT2	0.118234	8	0.442935
Trial 1	M1-2	C-P	M	0:06:07.612-0:06:07.878	IT2	0.169562	8	0.635226
Trial 1	M1-2	C-P	M	0:06:07.878-0:06:08.144	IT2	0.086723	8	0.324889
Trial 1	M1-2	C-P	M	0:06:08.144-0:06:08.410	IT2	0.107422	8	0.402431
Trial 1	M1-2	C-P	M	0:06:08.410-0:06:08.676	IT2	0.0901676	8	0.337788
Trial 1	M1-2	C-P	M	0:06:08.676-0:06:08.942	IT2	0.0601849	8	0.225466
Trial 1	M1-2	C-P	M	0:06:08.942-0:06:09.208	IT2	0.0492804	8	0.184615
Trial 1	M1-2	C-P	M	0:06:09.208-0:06:09.474	IT2	0.11857	8	0.444193
Trial 1	M1-2	C-P	M	0:06:09.474-0:06:09.740	IT2	0.0761855	8	0.285412
Trial 1	M1-2	C-P	M	0:06:09.740-0:06:10.006	IT2	0.109365	8	0.409706
Trial 1	M1-2	C-P	M	0:06:10.006-0:06:10.272	IT2	0.0561226	8	0.210251
Trial 1	M1-2	C-P	M	0:06:10.272-0:06:10.538	IT2	0.0958461	8	0.359061
Trial 1	M1-2	C-P	M	0:06:10.538-0:06:10.804	IT2	0.115146	7	0.492992
Trial 1	M1-2	C-P	M	0:06:10.804-0:06:11.070	IT2	0.0709713	8	0.265874
Trial 1	M1-2	C-P	M	0:06:11.070-0:06:11.336	IT2	0.233371	8	0.874269
Trial 1	M1-2	C-P	M	0:06:11.336-0:06:11.602	IT2	0.118337	8	0.443321
Trial 1	M1-2	C-P	M	0:06:11.602-0:06:11.868	IT2	0.0942219	8	0.35298
Trial 1	M1-2	C-P	M	0:06:11.868-0:06:12.134	IT2	0.220486	8	0.825994
Trial 1	M1-2	C-P	M	0:06:12.134-0:06:12.400	IT2	0.269476	8	1.00952
Trial 1	M1-2	C-P	M	0:06:12.400-0:06:12.666	IT2	0.0856066	8	0.320708
Trial 1	M1-2	C-P	M	0:06:12.666-0:06:12.932	IT2	0.061813	8	0.231568
Trial 1	M1-2	C-P	M	0:06:12.932-0:06:13.198	IT2	0.0756329	8	0.283343
Trial 1	M1-2	C-P	M	0:06:13.198-0:06:13.464	IT2	0.122289	8	0.458125
Trial 1	M1-2	C-P	M	0:06:13.464-0:06:13.730	IT2	0.142397	8	0.53345
Trial 1	M1-2	C-P	M	0:06:13.730-0:06:13.996	IT2	0.06408	8	0.240059
Trial 1	M1-2	C-P	M	0:06:13.996-0:06:14.262	IT2	0.14657	8	0.549088
Trial 1	M1-2	C-P	M	0:06:14.262-0:06:14.528	IT2	0.124687	8	0.46711
Trial 1	M1-2	C-P	M	0:06:14.528-0:06:14.794	IT2	0.18747	8	0.702306
Trial 1	M1-2	C-P	M	0:06:14.794-0:06:15.060	IT2	0.079112	8	0.296375
Trial 1	M1-2	C-P	M	0:06:15.060-0:06:15.326	IT2	0.111208	8	0.416613
Trial 1	M1-2	C-P	M	0:06:15.326-0:06:15.592	IT2	0.106971	8	0.400737
Trial 1	M1-2	C-P	M	0:06:15.592-0:06:15.858	IT2	0.0534478	8	0.200229
Trial 1	M1-2	C-P	M	0:06:15.858-0:06:16.124	IT2	0.148323	8	0.555654
Trial 1	M1-2	C-P	M	0:06:16.124-0:06:16.390	IT2	0.116212	8	0.435355
Trial 1	M1-2	C-P	M	0:06:16.390-0:06:16.656	IT2	0.176001	8	0.659339
Trial 1	M1-2	C-P	M	0:06:16.656-0:06:16.922	IT2	0.0786297	8	0.294564
Trial 1	M1-2	C-P	M	0:06:16.922-0:06:17.188	IT2	0.126649	8	0.474467
Trial 1	M1-2	C-P	M	0:06:17.188-0:06:17.454	IT2	0.112407	8	0.42111
Trial 1	M1-2	C-P	M	0:06:17.454-0:06:17.720	IT2	0.117984	8	0.441996
Trial 1	M1-2	C-P	M	0:06:17.720-0:06:17.986	IT2	0.118941	8	0.445584
Trial 1	M1-2	C-P	M	0:06:17.986-0:06:18.252	IT2	0.0879508	8	0.329485
Trial 1	M1-2	C-P	M	0:06:18.252-0:06:18.518	IT2	0.202593	8	0.758961
Trial 1	M1-2	C-P	M	0:06:18.518-0:06:18.784	IT2	0.0518439	8	0.19422
Trial 1	M1-2	C-P	M	0:06:18.784-0:06:19.050	IT2	0.100833	8	0.377744
Trial 1	M1-2	C-P	M	0:06:19.050-0:06:19.316	IT2	0.030177	8	0.11305
Trial 1	M1-2	C-P	M	0:06:19.316-0:06:19.582	IT2	0.138412	8	0.518522
Trial 1	M1-2	C-P	M	0:06:19.582-0:06:19.848	IT2	0.175455	8	0.6573
Trial 1	M1-2	C-P	M	0:06:19.848-0:06:20.114	IT2	0.0741501	8	0.277784
Trial 1	M1-2	C-P	M	0:06:20.114-0:06:20.380	IT2	0.177566	7	0.760234
Trial 1	M1-2	C-P	M	0:06:20.380-0:06:20.646	IT2	0.045509	8	0.17049
Trial 1	M1-2	C-P	M	0:06:20.646-0:06:20.912	IT2	0.262402	8	0.983027
Trial 1	M1-2	C-P	M	0:06:20.912-0:06:21.178	IT2	0.11442	8	0.428645
Trial 1	M1-2	C-P	M	0:06:21.178-0:06:21.444	IT2	0.207219	8	0.776297
Trial 1	M1-2	C-P	M	0:06:21.444-0:06:21.710	IT2	0.0992821	8	0.371936
Trial 1	M1-2	C-P	M	0:06:21.710-0:06:21.976	IT2	0.0761973	8	0.285456
Trial 1	M1-2	C-P	M	0:06:21.976-0:06:22.242	IT2	0.18907	8	0.708302
Trial 1	M1-2	C-P	M	0:06:22.242-0:06:22.508	IT2	0.0175058	8	0.0655816
Trial 1	M1-2	C-P	M	0:06:22.508-0:06:22.774	IT2	0.0976846	8	0.365949
Trial 1	M1-2	C-P	M	0:06:22.774-0:06:23.040	IT2	0.106785	8	0.400041
Trial 1	M1-2	C-P	M	0:06:23.040-0:06:23.306	IT2	0.0784805	8	0.294011
Trial 1	M1-2	C-P	M	0:06:23.306-0:06:23.572	IT2	0.0834344	8	0.312567
Trial 1	M1-2	C-P	M	0:06:23.572-0:06:23.838	IT2	0.0974394	8	0.36503
Trial 1	M1-2	C-P	M	0:06:23.838-0:06:24.104	IT2	0.0348283	8	0.130476
Trial 1	M1-2	C-P	M	0:06:24.104-0:06:24.370	IT2	0.127354	8	0.477097
Trial 1	M1-2	C-P	M	0:06:24.370-0:06:24.636	IT2	0.123623	8	0.463123
Trial 1	M1-2	C-P	M	0:06:24.636-0:06:24.902	IT2	0.136618	8	0.511805
Trial 1	M1-2	C-P	M	0:06:24.902-0:06:25.168	IT2	0.166718	8	0.624566
Trial 1	M1-2	C-P	M	0:06:25.168-0:06:25.434	IT2	0.105804	8	0.396367
Trial 1	M1-2	C-P	M	0:06:25.434-0:06:25.700	IT2	0.15456	8	0.57902
Trial 1	M1-2	C-P	M	0:06:25.700-0:06:25.966	IT2	0.100801	8	0.377626
Trial 1	M1-2	C-P	M	0:06:25.966-0:06:26.232	IT2	0.137471	8	0.514998
Trial 1	M1-2	C-P	M	0:06:26.232-0:06:26.498	IT2	0.140749	8	0.527277
Trial 1	M1-2	C-P	M	0:06:26.498-0:06:26.764	IT2	0.136615	8	0.511795
Trial 1	M1-2	C-P	M	0:06:26.764-0:06:27.030	IT2	0.273244	8	1.02364
Trial 1	M1-2	C-P	M	0:06:27.030-0:06:27.296	IT2	0.0713595	8	0.267332
Trial 1	M1-2	C-P	M	0:06:27.296-0:06:27.562	IT2	0.223567	8	0.837532
Trial 1	M1-2	C-P	M	0:06:27.562-0:06:27.828	IT2	0.123748	8	0.463591
Trial 1	M1-2	C-P	M	0:06:27.828-0:06:28.094	IT2	0.206978	8	0.775391
Trial 1	M1-2	C-P	M	0:06:28.094-0:06:28.360	IT2	0.0964019	8	0.361145
Trial 1	M1-2	C-P	M	0:06:28.360-0:06:28.626	IT2	0.103537	8	0.387877
Trial 1	M1-2	C-P	M	0:06:28.626-0:06:28.892	IT2	0.117398	8	0.439802
Trial 1	M1-2	C-P	M	0:06:28.892-0:06:29.158	IT2	0.171982	8	0.644286
Trial 1	M1-2	C-P	M	0:06:29.158-0:06:29.424	IT2	0.200334	8	0.750501
Trial 1	M1-2	C-P	M	0:06:29.424-0:06:29.690	IT2	0.0688195	8	0.257815
Trial 1	M1-2	C-P	M	0:06:29.690-0:06:29.956	IT2	0.147572	7	0.631815
Trial 1	M1-2	C-P	M	0:06:29.956-0:06:30.222	CS3a	0.0959967	8	0.359628
Trial 1	M1-2	C-P	M	0:06:30.222-0:06:30.488	CS3a	0.133107	8	0.498651
Trial 1	M1-2	C-P	M	0:06:30.488-0:06:30.754	CS3a	0.0792634	8	0.296944
Trial 1	M1-2	C-P	M	0:06:30.754-0:06:31.020	CS3a	0.0461486	8	0.172883
Trial 1	M1-2	C-P	M	0:06:31.020-0:06:31.286	CS3a	0.161496	8	0.605001
Trial 1	M1-2	C-P	M	0:06:31.286-0:06:31.552	CS3a	0.190897	8	0.715146
Trial 1	M1-2	C-P	M	0:06:31.552-0:06:31.818	CS3a	0.396887	8	1.48684
Trial 1	M1-2	C-P	M	0:06:31.818-0:06:32.084	CS3a	0.313749	8	1.17537
Trial 1	M1-2	C-P	M	0:06:32.084-0:06:32.350	CS3a	0.100691	8	0.377219
Trial 1	M1-2	C-P	M	0:06:32.350-0:06:32.616	CS3a	0.138069	8	0.517244
Trial 1	M1-2	C-P	M	0:06:32.616-0:06:32.882	CS3a	0.155251	8	0.581617
Trial 1	M1-2	C-P	M	0:06:32.882-0:06:33.148	CS3a	0.104561	8	0.391713
Trial 1	M1-2	C-P	M	0:06:33.148-0:06:33.414	CS3a	0.232887	8	0.872449
Trial 1	M1-2	C-P	M	0:06:33.414-0:06:33.680	CS3a	0.11196	8	0.419429
Trial 1	M1-2	C-P	M	0:06:33.680-0:06:33.946	CS3a	0.133048	8	0.498433
Trial 1	M1-2	C-P	M	0:06:33.946-0:06:34.212	CS3a	0.130341	8	0.488291
Trial 1	M1-2	C-P	M	0:06:34.212-0:06:34.478	CS3a	0.183789	8	0.688518
Trial 1	M1-2	C-P	M	0:06:34.478-0:06:34.744	CS3a	0.154089	8	0.577254
Trial 1	M1-2	C-P	M	0:06:34.744-0:06:35.010	CS3a	0.0717258	8	0.268701
Trial 1	M1-2	C-P	M	0:06:35.010-0:06:35.276	CS3a	0.178065	8	0.667076
Trial 1	M1-2	C-P	M	0:06:35.276-0:06:35.542	CS3a	0.0993781	8	0.372296
Trial 1	M1-2	C-P	M	0:06:35.542-0:06:35.808	CS3a	0.0813825	8	0.304877
Trial 1	M1-2	C-P	M	0:06:35.808-0:06:36.074	CS3a	0.139392	8	0.522198
Trial 1	M1-2	C-P	M	0:06:36.074-0:06:36.340	CS3a	0.0708853	8	0.265555
Trial 1	M1-2	C-P	M	0:06:36.340-0:06:36.606	CS3a	0.0991682	8	0.371506
Trial 1	M1-2	C-P	M	0:06:36.606-0:06:36.872	CS3a	0.103997	8	0.389598
Trial 1	M1-2	C-P	M	0:06:36.872-0:06:37.138	CS3a	0.202412	8	0.758284
Trial 1	M1-2	C-P	M	0:06:37.138-0:06:37.404	CS3a	0.0931369	8	0.348911
Trial 1	M1-2	C-P	M	0:06:37.404-0:06:37.670	CS3a	0.130528	8	0.48899
Trial 1	M1-2	C-P	M	0:06:37.670-0:06:37.936	CS3a	0.190899	8	0.715152
Trial 1	M1-2	C-P	M	0:06:37.936-0:06:38.202	CS3a	0.233561	8	0.874991
Trial 1	M1-2	C-P	M	0:06:38.202-0:06:38.468	CS3a	0.0797816	8	0.298884
Trial 1	M1-2	C-P	M	0:06:38.468-0:06:38.734	CS3a	0.0190554	8	0.0713857
Trial 1	M1-2	C-P	M	0:06:38.734-0:06:39.000	CS3a	0.0922093	8	0.34544
Trial 1	M1-2	C-P	M	0:06:39.000-0:06:39.266	CS3a	0.0692753	8	0.259522
Trial 1	M1-2	C-P	M	0:06:39.266-0:06:39.532	CS3a	0.307039	7	1.31455
Trial 1	M1-2	C-P	M	0:06:39.532-0:06:39.798	CS3a	0.116719	8	0.437258
Trial 1	M1-2	C-P	M	0:06:39.798-0:06:40.064	CS3b	0.20161	8	0.755276
Trial 1	M1-2	C-P	M	0:06:40.064-0:06:40.330	CS3b	1.54214	8	5.77727
Trial 1	M1-2	C-P	M	0:06:40.330-0:06:40.596	CS3b	0.858076	8	3.21455
Trial 1	M1-2	C-P	M	0:06:40.596-0:06:40.862	CS3b	2.68456	8	10.057
Trial 1	M1-2	C-P	M	0:06:40.862-0:06:41.128	CS3b	5.27393	8	19.7575
Trial 1	M1-2	C-P	M	0:06:41.128-0:06:41.394	CS3b	5.47064	8	20.4943
Trial 1	M1-2	C-P	M	0:06:41.394-0:06:41.660	CS3b	4.75561	8	17.8158
Trial 1	M1-2	C-P	M	0:06:41.660-0:06:41.926	CS3b	2.37326	8	8.89083
Trial 1	M1-2	C-P	M	0:06:41.926-0:06:42.192	CS3b	0.76948	8	2.88266
Trial 1	M1-2	C-P	M	0:06:42.192-0:06:42.458	CS3b	0.618032	8	2.31529
Trial 1	M1-2	C-P	M	0:06:42.458-0:06:42.724	CS3b	0.316253	8	1.18476
Trial 1	M1-2	C-P	M	0:06:42.724-0:06:42.990	CS3b	0.264751	8	0.991819
Trial 1	M1-2	C-P	M	0:06:42.990-0:06:43.256	CS3b	0.298753	8	1.1192
Trial 1	M1-2	C-P	M	0:06:43.256-0:06:43.522	CS3b	0.193317	8	0.72421
Trial 1	M1-2	C-P	M	0:06:43.522-0:06:43.788	CS3b	0.263922	8	0.988712
Trial 1	M1-2	C-P	M	0:06:43.788-0:06:44.054	CS3b	0.0964383	8	0.361282
Trial 1	M1-2	C-P	M	0:06:44.054-0:06:44.320	CS3b	0.232191	8	0.869857
Trial 1	M1-2	C-P	M	0:06:44.320-0:06:44.586	CS3b	0.0736079	8	0.275755
Trial 1	M1-2	C-P	M	0:06:44.586-0:06:44.852	CS3b	0.33397	8	1.25113
Trial 1	M1-2	C-P	M	0:06:44.852-0:06:45.118	CS3b	0.350657	8	1.31365
Trial 1	M1-2	C-P	M	0:06:45.118-0:06:45.384	CS3b	1.18374	8	4.43461
Trial 1	M1-2	C-P	M	0:06:45.384-0:06:45.650	CS3b	1.6376	8	6.13485
Trial 1	M1-2	C-P	M	0:06:45.650-0:06:45.916	CS3b	1.41871	8	5.31484
Trial 1	M1-2	C-P	M	0:06:45.916-0:06:46.182	CS3b	0.47043	8	1.76236
Trial 1	M1-2	C-P	M	0:06:46.182-0:06:46.448	CS3b	0.477309	8	1.78812
Trial 1	M1-2	C-P	M	0:06:46.448-0:06:46.714	CS3b	0.630523	8	2.3621
Trial 1	M1-2	C-P	M	0:06:46.714-0:06:46.980	CS3b	0.482581	8	1.80787
Trial 1	M1-2	C-P	M	0:06:46.980-0:06:47.246	CS3b	0.387532	8	1.45178
Trial 1	M1-2	C-P	M	0:06:47.246-0:06:47.512	CS3b	0.0804315	8	0.301316
Trial 1	M1-2	C-P	M	0:06:47.512-0:06:47.778	CS3b	0.238264	8	0.892593
Trial 1	M1-2	C-P	M	0:06:47.778-0:06:48.044	CS3b	0.151506	8	0.567584
Trial 1	M1-2	C-P	M	0:06:48.044-0:06:48.310	CS3b	0.31305	8	1.17277
Trial 1	M1-2	C-P	M	0:06:48.310-0:06:48.576	CS3b	0.284363	8	1.06529
Trial 1	M1-2	C-P	M	0:06:48.576-0:06:48.842	CS3b	0.212607	7	0.910253
Trial 1	M1-2	C-P	M	0:06:48.842-0:06:49.108	CS3b	0.188241	8	0.705192
Trial 1	M1-2	C-P	M	0:06:49.108-0:06:49.374	CS3b	0.183947	8	0.689113
Trial 1	M1-2	C-P	M	0:06:49.374-0:06:49.640	CS3b	0.241908	8	0.906243
Trial 1	M1-2	C-P	M	0:06:49.640-0:06:49.906	CS3b	0.223226	8	0.836269
Trial 1	M1-2	C-P	M	0:06:49.906-0:06:50.172	CS3b	0.131276	8	0.491796
Trial 1	M1-2	C-P	M	0:06:50.172-0:06:50.438	POST	0.317814	8	1.19062
Trial 1	M1-2	C-P	M	0:06:50.438-0:06:50.704	POST	0.181724	8	0.680786
Trial 1	M1-2	C-P	M	0:06:50.704-0:06:50.970	POST	0.489279	8	1.83296
Trial 1	M1-2	C-P	M	0:06:50.970-0:06:51.236	POST	0.336731	8	1.26148
Trial 1	M1-2	C-P	M	0:06:51.236-0:06:51.502	POST	0.470596	8	1.76296
Trial 1	M1-2	C-P	M	0:06:51.502-0:06:51.768	POST	0.272079	8	1.01928
Trial 1	M1-2	C-P	M	0:06:51.768-0:06:52.034	POST	0.205746	8	0.77077
Trial 1	M1-2	C-P	M	0:06:52.034-0:06:52.300	POST	0.13883	8	0.520092
Trial 1	M1-2	C-P	M	0:06:52.300-0:06:52.566	POST	0.0847922	8	0.317652
Trial 1	M1-2	C-P	M	0:06:52.566-0:06:52.832	POST	0.125082	8	0.468588
Trial 1	M1-2	C-P	M	0:06:52.832-0:06:53.098	POST	0.0894728	8	0.335187
Trial 1	M1-2	C-P	M	0:06:53.098-0:06:53.364	POST	0.202171	8	0.757391
Trial 1	M1-2	C-P	M	0:06:53.364-0:06:53.630	POST	0.132576	8	0.496659
Trial 1	M1-2	C-P	M	0:06:53.630-0:06:53.896	POST	0.131424	8	0.492349
Trial 1	M1-2	C-P	M	0:06:53.896-0:06:54.162	POST	0.252993	8	0.947769
Trial 1	M1-2	C-P	M	0:06:54.162-0:06:54.428	POST	0.365841	8	1.37052
Trial 1	M1-2	C-P	M	0:06:54.428-0:06:54.694	POST	0.171424	8	0.642193
Trial 1	M1-2	C-P	M	0:06:54.694-0:06:54.960	POST	0.089287	8	0.33449
Trial 1	M1-2	C-P	M	0:06:54.960-0:06:55.226	POST	0.308433	8	1.15547
Trial 1	M1-2	C-P	M	0:06:55.226-0:06:55.492	POST	0.114093	8	0.427418
Trial 1	M1-2	C-P	M	0:06:55.492-0:06:55.758	POST	0.159187	8	0.59635
Trial 1	M1-2	C-P	M	0:06:55.758-0:06:56.024	POST	0.148626	8	0.556787
Trial 1	M1-2	C-P	M	0:06:56.024-0:06:56.290	POST	0.312996	8	1.17257
Trial 1	M1-2	C-P	M	0:06:56.290-0:06:56.556	POST	0.151243	8	0.56659
Trial 1	M1-2	C-P	M	0:06:56.556-0:06:56.822	POST	0.296644	8	1.1113
Trial 1	M1-2	C-P	M	0:06:56.822-0:06:57.088	POST	0.134166	8	0.502618
Trial 1	M1-2	C-P	M	0:06:57.088-0:06:57.354	POST	0.117868	8	0.441566
Trial 1	M1-2	C-P	M	0:06:57.354-0:06:57.620	POST	0.314002	8	1.17633
Trial 1	M1-2	C-P	M	0:06:57.620-0:06:57.886	POST	0.313977	8	1.17623
Trial 1	M1-2	C-P	M	0:06:57.886-0:06:58.152	POST	0.320083	8	1.19911
Trial 1	M1-2	C-P	M	0:06:58.152-0:06:58.418	POST	0.0886941	7	0.379735
Trial 1	M1-2	C-P	M	0:06:58.418-0:06:58.684	POST	0.114722	8	0.429778
Trial 1	M1-2	C-P	M	0:06:58.684-0:06:58.950	POST	0.0526522	8	0.197247
Trial 1	M1-2	C-P	M	0:06:58.950-0:06:59.216	POST	0.122019	8	0.457115
Trial 1	M1-2	C-P	M	0:06:59.216-0:06:59.482	POST	0.488514	8	1.83009
Trial 1	M1-2	C-P	M	0:06:59.482-0:06:59.748	POST	0.100489	8	0.376452
Trial 1	M1-2	C-P	M	0:06:59.748-0:07:00.014	POST	0.387868	8	1.45305
Trial 1	M1-2	C-P	M	0:07:00.014-0:07:00.280	POST	0.145623	8	0.545535
Trial 1	M1-2	C-P	M	0:07:00.280-0:07:00.546	POST	0.287075	8	1.07545
Trial 1	M1-2	C-P	M	0:07:00.546-0:07:00.812	POST	0.221345	8	0.829212
Trial 1	M1-2	C-P	M	0:07:00.812-0:07:01.078	POST	0.256645	8	0.961451
Trial 1	M1-2	C-P	M	0:07:01.078-0:07:01.344	POST	0.23029	8	0.862721
Trial 1	M1-2	C-P	M	0:07:01.344-0:07:01.610	POST	0.13748	8	0.51503
Trial 1	M1-2	C-P	M	0:07:01.610-0:07:01.876	POST	0.283847	8	1.06336
Trial 1	M1-2	C-P	M	0:07:01.876-0:07:02.142	POST	0.0793919	8	0.297423
Trial 1	M1-2	C-P	M	0:07:02.142-0:07:02.408	POST	0.271679	8	1.01778
Trial 1	M1-2	C-P	M	0:07:02.408-0:07:02.674	POST	0.0503855	8	0.188759
Trial 1	M1-2	C-P	M	0:07:02.674-0:07:02.940	POST	0.134135	8	0.502502
Trial 1	M1-2	C-P	M	0:07:02.940-0:07:03.206	POST	0.0709261	8	0.265705
Trial 1	M1-2	C-P	M	0:07:03.206-0:07:03.472	POST	0.210699	8	0.789338
Trial 1	M1-2	C-P	M	0:07:03.472-0:07:03.738	POST	0.13931	8	0.521889
Trial 1	M1-2	C-P	M	0:07:03.738-0:07:04.004	POST	0.0266298	8	0.0997629
Trial 1	M1-2	C-P	M	0:07:04.004-0:07:04.270	POST	0.219923	8	0.823883
Trial 1	M1-2	C-P	M	0:07:04.270-0:07:04.536	POST	0.117262	8	0.439291
Trial 1	M1-2	C-P	M	0:07:04.536-0:07:04.802	POST	0.250551	8	0.938622
Trial 1	M1-2	C-P	M	0:07:04.802-0:07:05.068	POST	0.0265476	8	0.0994533
Trial 1	M1-2	C-P	M	0:07:05.068-0:07:05.334	POST	0.21421	8	0.802487
Trial 1	M1-2	C-P	M	0:07:05.334-0:07:05.600	POST	0.107532	8	0.40284
Trial 1	M1-2	C-P	M	0:07:05.600-0:07:05.866	POST	0.148789	8	0.5574
Trial 1	M1-2	C-P	M	0:07:05.866-0:07:06.132	POST	0.140825	8	0.527565
Trial 1	M1-2	C-P	M	0:07:06.132-0:07:06.398	POST	0.0389314	8	0.145847
Trial 1	M1-2	C-P	M	0:07:06.398-0:07:06.664	POST	0.140809	8	0.527506
Trial 1	M1-2	C-P	M	0:07:06.664-0:07:06.930	POST	0.0979626	8	0.366997
Trial 1	M1-2	C-P	M	0:07:06.930-0:07:07.196	POST	0.253474	8	0.949572
Trial 1	M1-2	C-P	M	0:07:07.196-0:07:07.462	POST	0.141185	8	0.528926
Trial 1	M1-2	C-P	M	0:07:07.462-0:07:07.728	POST	0.282437	8	1.05808
Trial 1	M1-2	C-P	M	0:07:07.728-0:07:07.994	POST	0.0742872	7	0.318058
Trial 1	M1-2	C-P	M	0:07:07.994-0:07:08.260	POST	0.191974	8	0.71919
Trial 1	M1-2	C-P	M	0:07:08.260-0:07:08.526	POST	0.0853153	8	0.319613
Trial 1	M1-2	C-P	M	0:07:08.526-0:07:08.792	POST	0.132242	8	0.495409
Trial 1	M1-2	C-P	M	0:07:08.792-0:07:09.058	POST	0.0960399	8	0.35979
Trial 1	M1-2	C-P	M	0:07:09.058-0:07:09.324	POST	0.0545664	8	0.204418
Trial 1	M1-2	C-P	M	0:07:09.324-0:07:09.590	POST	0.117724	8	0.441025
Trial 1	M1-2	C-P	M	0:07:09.590-0:07:09.856	POST	0.135851	8	0.50893
Trial 1	M1-2	C-P	M	0:07:09.856-0:07:10.122	POST	0.184184	8	0.689993
Trial 1	M1-2	C-P	M	0:07:10.122-0:07:10.388	POST	0.156646	8	0.586841
Trial 1	M1-2	C-P	M	0:07:10.388-0:07:10.654	POST	0.25132	8	0.941505
Trial 1	M1-2	C-P	M	0:07:10.654-0:07:10.920	POST	0.0862007	8	0.322934
Trial 1	M1-2	C-P	M	0:07:10.920-0:07:11.186	POST	0.0823963	8	0.308677
Trial 1	M1-2	C-P	M	0:07:11.186-0:07:11.452	POST	0.2568	8	0.962043
Trial 1	M1-2	C-P	M	0:07:11.452-0:07:11.718	POST	0.166677	8	0.624422
Trial 1	M1-2	C-P	M	0:07:11.718-0:07:11.984	POST	0.267778	8	1.00316
Trial 1	M1-2	C-P	M	0:07:11.984-0:07:12.250	POST	0.236949	8	0.88767
Trial 1	M1-2	C-P	M	0:07:12.250-0:07:12.516	POST	0.158283	8	0.592965
Trial 1	M1-2	C-P	M	0:07:12.516-0:07:12.782	POST	0.0730714	8	0.273742
Trial 1	M1-2	C-P	M	0:07:12.782-0:07:13.048	POST	0.287418	8	1.07673
Trial 1	M1-2	C-P	M	0:07:13.048-0:07:13.314	POST	0.389069	8	1.45754
Trial 1	M1-2	C-P	M	0:07:13.314-0:07:13.580	POST	0.246989	8	0.925285
Trial 1	M1-2	C-P	M	0:07:13.580-0:07:13.846	POST	0.248484	8	0.930878
Trial 1	M1-2	C-P	M	0:07:13.846-0:07:14.112	POST	0.241882	8	0.906156
Trial 1	M1-2	C-P	M	0:07:14.112-0:07:14.378	POST	0.249552	8	0.934889
Trial 1	M1-2	C-P	M	0:07:14.378-0:07:14.644	POST	0.241695	8	0.905444
Trial 1	M1-2	C-P	M	0:07:14.644-0:07:14.910	POST	0.128929	8	0.483001
Trial 1	M1-2	C-P	M	0:07:14.910-0:07:15.176	POST	0.123295	8	0.461894
Trial 1	M1-2	C-P	M	0:07:15.176-0:07:15.442	POST	0.159285	8	0.596718
Trial 1	M1-2	C-P	M	0:07:15.442-0:07:15.708	POST	0.133123	8	0.498714
Trial 1	M1-2	C-P	M	0:07:15.708-0:07:15.974	POST	0.0782635	8	0.293193
Trial 1	M1-2	C-P	M	0:07:15.974-0:07:16.240	POST	0.111692	8	0.418426
Trial 1	M1-2	C-P	M	0:07:16.240-0:07:16.506	POST	0.047217	8	0.176888
Trial 1	M1-2	C-P	M	0:07:16.506-0:07:16.772	POST	0.0931453	8	0.348943
Trial 1	M1-2	C-P	M	0:07:16.772-0:07:17.038	POST	0.0891682	8	0.334048
Trial 1	M1-2	C-P	M	0:07:17.038-0:07:17.304	POST	0.157722	8	0.59087
Trial 1	M1-2	C-P	M	0:07:17.304-0:07:17.570	POST	0.107181	7	0.45889
Trial 1	M1-2	C-P	M	0:07:17.570-0:07:17.836	POST	0.122894	8	0.460393
Trial 1	M1-2	C-P	M	0:07:17.836-0:07:18.102	POST	0.201181	8	0.753672
Trial 1	M1-2	C-P	M	0:07:18.102-0:07:18.368	POST	0.0730329	8	0.273598
Trial 1	M1-2	C-P	M	0:07:18.368-0:07:18.634	POST	0.158382	8	0.593336
Trial 1	M1-2	C-P	M	0:07:18.634-0:07:18.900	POST	0.117304	8	0.439448
Trial 1	M1-2	C-P	M	0:07:18.900-0:07:19.166	POST	0.136727	8	0.512216
Trial 1	M1-2	C-P	M	0:07:19.166-0:07:19.432	POST	0.0962716	8	0.360656
Trial 1	M1-2	C-P	M	0:07:19.432-0:07:19.698	POST	0.199427	8	0.747104
Trial 1	M1-2	C-P	M	0:07:19.698-0:07:19.964	POST	0.116797	8	0.437547
Trial 1	M1-2	C-P	M	0:07:19.964-0:07:20.230	POST	0.124926	8	0.468003
Trial 1	M1-2	C-P	M	0:07:20.230-0:07:20.496	POST	0.114046	8	0.427243
Trial 1	M1-2	C-P	M	0:07:20.496-0:07:20.762	POST	0.0909097	8	0.34057
Trial 1	M1-2	C-P	M	0:07:20.762-0:07:21.028	POST	0.140601	8	0.526727
Trial 1	M1-2	C-P	M	0:07:21.028-0:07:21.294	POST	0.175171	8	0.65623
Trial 1	M1-2	C-P	M	0:07:21.294-0:07:21.560	POST	0.252956	8	0.947642
Trial 1	M1-2	C-P	M	0:07:21.560-0:07:21.826	POST	0.170659	8	0.639341
Trial 1	M1-2	C-P	M	0:07:21.826-0:07:22.092	POST	0.406117	8	1.52141
Trial 1	M1-2	C-P	M	0:07:22.092-0:07:22.358	POST	0.153124	8	0.573641
Trial 1	M1-2	C-P	M	0:07:22.358-0:07:22.624	POST	0.0570943	8	0.21389
Trial 1	M1-2	C-P	M	0:07:22.624-0:07:22.890	POST	0.185844	8	0.696214
Trial 1	M1-2	C-P	M	0:07:22.890-0:07:23.156	POST	0.143186	8	0.536412
Trial 1	M1-2	C-P	M	0:07:23.156-0:07:23.422	POST	0.303209	8	1.1359
Trial 1	M1-2	C-P	M	0:07:23.422-0:07:23.688	POST	0.0654023	8	0.245011
Trial 1	M1-2	C-P	M	0:07:23.688-0:07:23.954	POST	0.211625	8	0.792801
Trial 1	M1-2	C-P	M	0:07:23.954-0:07:24.220	POST	0.126461	8	0.473756
Trial 1	M1-2	C-P	M	0:07:24.220-0:07:24.486	POST	0.198205	8	0.742528
Trial 1	M1-2	C-P	M	0:07:24.486-0:07:24.752	POST	0.161441	8	0.604795
Trial 1	M1-2	C-P	M	0:07:24.752-0:07:25.018	POST	0.235273	8	0.881397
Trial 1	M1-2	C-P	M	0:07:25.018-0:07:25.284	POST	0.245715	8	0.920509
Trial 1	M1-2	C-P	M	0:07:25.284-0:07:25.550	POST	0.115002	8	0.430827
Trial 1	M1-2	C-P	M	0:07:25.550-0:07:25.816	POST	0.0974433	8	0.36505
Trial 1	M1-2	C-P	M	0:07:25.816-0:07:26.082	POST	0.152297	8	0.570542
Trial 1	M1-2	C-P	M	0:07:26.082-0:07:26.348	POST	0.0941388	8	0.352669
Trial 1	M1-2	C-P	M	0:07:26.348-0:07:26.614	POST	0.0548546	8	0.205501
Trial 1	M1-2	C-P	M	0:07:26.614-0:07:26.880	POST	0.258686	7	1.10755
Trial 1	M1-2	C-P	M	0:07:26.880-0:07:27.146	POST	0.0650296	8	0.243617
Trial 1	M1-2	C-P	M	0:07:27.146-0:07:27.412	POST	0.0842529	8	0.315635
Trial 1	M1-2	C-P	M	0:07:27.412-0:07:27.678	POST	0.277169	8	1.03834
Trial 1	M1-2	C-P	M	0:07:27.678-0:07:27.944	POST	0.0902227	8	0.338
Trial 1	M1-2	C-P	M	0:07:27.944-0:07:28.210	POST	0.275985	8	1.0339
Trial 1	M1-2	C-P	M	0:07:28.210-0:07:28.476	POST	0.0893222	8	0.334622
Trial 1	M1-2	C-P	M	0:07:28.476-0:07:28.742	POST	0.143909	8	0.539118
Trial 1	M1-2	C-P	M	0:07:28.742-0:07:29.008	POST	0.0775916	8	0.290679
Trial 1	M1-2	C-P	M	0:07:29.008-0:07:29.274	POST	0.174888	8	0.655179
Trial 1	M1-2	C-P	M	0:07:29.274-0:07:29.540	POST	0.0974823	8	0.36519
Trial 1	M1-2	C-P	M	0:07:29.540-0:07:29.806	POST	0.235662	8	0.882845
Trial 1	M1-2	C-P	M	0:07:29.806-0:07:30.072	POST	0.310964	8	1.16495
Trial 1	M1-2	C-P	M	0:07:30.072-0:07:30.338	POST	0.220171	8	0.82482
Trial 1	M1-2	C-P	M	0:07:30.338-0:07:30.604	POST	0.205005	8	0.768004
Trial 1	M1-2	C-P	M	0:07:30.604-0:07:30.870	POST	0.142279	8	0.533018
Trial 1	M1-2	C-P	M	0:07:30.870-0:07:31.136	POST	0.251475	8	0.942085
Trial 1	M1-2	C-P	M	0:07:31.136-0:07:31.402	POST	0.133306	8	0.499397
Trial 1	M1-2	C-P	M	0:07:31.402-0:07:31.668	POST	0.259029	8	0.970385
Trial 1	M1-2	C-P	M	0:07:31.668-0:07:31.934	POST	0.140651	8	0.526916
Trial 1	M1-2	C-P	M	0:07:31.934-0:07:32.200	POST	0.281659	8	1.05516
Trial 1	M1-2	C-P	M	0:07:32.200-0:07:32.466	POST	0.213662	8	0.800437
Trial 1	M1-2	C-P	M	0:07:32.466-0:07:32.732	POST	0.068197	8	0.255482
Trial 1	M1-2	C-P	M	0:07:32.732-0:07:32.998	POST	0.318883	8	1.19461
Trial 1	M1-2	C-P	M	0:07:32.998-0:07:33.264	POST	0.0679874	8	0.254696
Trial 1	M1-2	C-P	M	0:07:33.264-0:07:33.530	POST	0.115657	8	0.433279
Trial 1	M1-2	C-P	M	0:07:33.530-0:07:33.796	POST	0.03776	8	0.141457
Trial 1	M1-2	C-P	M	0:07:33.796-0:07:34.062	POST	0.116984	8	0.43825
Trial 1	M1-2	C-P	M	0:07:34.062-0:07:34.328	POST	0.177601	8	0.665331
Trial 1	M1-2	C-P	M	0:07:34.328-0:07:34.594	POST	0.269562	8	1.00984
Trial 1	M1-2	C-P	M	0:07:34.594-0:07:34.860	POST	0.219158	8	0.821014
Trial 1	M1-2	C-P	M	0:07:34.860-0:07:35.126	POST	0.118752	8	0.444873
Trial 1	M1-2	C-P	M	0:07:35.126-0:07:35.392	POST	0.244283	8	0.915154
Trial 1	M1-2	C-P	M	0:07:35.392-0:07:35.658	POST	0.0469162	8	0.17576
Trial 1	M1-2	C-P	M	0:07:35.658-0:07:35.924	POST	0.147492	8	0.552536
Trial 1	M1-2	C-P	M	0:07:35.924-0:07:36.190	POST	0.212455	8	0.795907
Trial 1	M1-2	C-P	M	0:07:36.190-0:07:36.456	POST	0.0139869	7	0.0598834
Trial 1	M1-2	C-P	M	0:07:36.456-0:07:36.722	POST	0.282447	8	1.05812
Trial 1	M1-2	C-P	M	0:07:36.722-0:07:36.988	POST	0.052591	8	0.197019
Trial 1	M1-2	C-P	M	0:07:36.988-0:07:37.254	POST	0.08833	8	0.330909
Trial 1	M1-2	C-P	M	0:07:37.254-0:07:37.520	POST	0.313474	8	1.17435
Trial 1	M1-2	C-P	M	0:07:37.520-0:07:37.786	POST	0.238904	8	0.894991
Trial 1	M1-2	C-P	M	0:07:37.786-0:07:38.052	POST	0.144458	8	0.541184
Trial 1	M1-2	C-P	M	0:07:38.052-0:07:38.318	POST	0.128705	8	0.482162
Trial 1	M1-2	C-P	M	0:07:38.318-0:07:38.584	POST	0.167827	8	0.628726
Trial 1	M1-2	C-P	M	0:07:38.584-0:07:38.850	POST	0.0529244	8	0.198267
Trial 1	M1-2	C-P	M	0:07:38.850-0:07:39.116	POST	0.19169	8	0.718118
Trial 1	M1-2	C-P	M	0:07:39.116-0:07:39.382	POST	0.122276	8	0.458077
Trial 1	M1-2	C-P	M	0:07:39.382-0:07:39.648	POST	0.125421	8	0.469854
Trial 1	M1-2	C-P	M	0:07:39.648-0:07:39.914	POST	0.0629737	8	0.235914
Trial 1	M1-2	C-P	M	0:07:39.914-0:07:40.180	POST	0.0471532	6	0.235528
Trial 2	M2-4	C-P	M	Start-0:00:00.266	BL	0.0857443	7	0.367108
Trial 2	M2-4	C-P	M	0:00:00.266-0:00:00.532	BL	0.0679411	8	0.254522
Trial 2	M2-4	C-P	M	0:00:00.532-0:00:00.798	BL	0.0598299	8	0.224138
Trial 2	M2-4	C-P	M	0:00:00.798-0:00:01.064	BL	0.0131697	8	0.0493376
Trial 2	M2-4	C-P	M	0:00:01.064-0:00:01.330	BL	0.0169986	8	0.0636804
Trial 2	M2-4	C-P	M	0:00:01.330-0:00:01.596	BL	0.0601253	8	0.225243
Trial 2	M2-4	C-P	M	0:00:01.596-0:00:01.862	BL	0.0771888	8	0.289171
Trial 2	M2-4	C-P	M	0:00:01.862-0:00:02.128	BL	0.0527208	8	0.197504
Trial 2	M2-4	C-P	M	0:00:02.128-0:00:02.394	BL	0.0407569	8	0.152684
Trial 2	M2-4	C-P	M	0:00:02.394-0:00:02.660	BL	0.0584428	8	0.218939
Trial 2	M2-4	C-P	M	0:00:02.660-0:00:02.926	BL	0.0699969	8	0.262226
Trial 2	M2-4	C-P	M	0:00:02.926-0:00:03.192	BL	0.128378	8	0.480934
Trial 2	M2-4	C-P	M	0:00:03.192-0:00:03.458	BL	0.0852621	8	0.319413
Trial 2	M2-4	C-P	M	0:00:03.458-0:00:03.724	BL	0.0841359	8	0.315193
Trial 2	M2-4	C-P	M	0:00:03.724-0:00:03.990	BL	0.0755031	8	0.282851
Trial 2	M2-4	C-P	M	0:00:03.990-0:00:04.256	BL	0.0519679	8	0.194685
Trial 2	M2-4	C-P	M	0:00:04.256-0:00:04.522	BL	0.0565706	8	0.211928
Trial 2	M2-4	C-P	M	0:00:04.522-0:00:04.788	BL	0.0555418	8	0.208073
Trial 2	M2-4	C-P	M	0:00:04.788-0:00:05.054	BL	0.250119	8	0.937008
Trial 2	M2-4	C-P	M	0:00:05.054-0:00:05.320	BL	0.24735	8	0.926633
Trial 2	M2-4	C-P	M	0:00:05.320-0:00:05.586	BL	0.160571	8	0.601536
Trial 2	M2-4	C-P	M	0:00:05.586-0:00:05.852	BL	0.082637	8	0.309578
Trial 2	M2-4	C-P	M	0:00:05.852-0:00:06.118	BL	0.122895	8	0.460393
Trial 2	M2-4	C-P	M	0:00:06.118-0:00:06.384	BL	0.053391	8	0.200018
Trial 2	M2-4	C-P	M	0:00:06.384-0:00:06.650	BL	0.153285	8	0.574239
Trial 2	M2-4	C-P	M	0:00:06.650-0:00:06.916	BL	0.061894	8	0.231869
Trial 2	M2-4	C-P	M	0:00:06.916-0:00:07.182	BL	0.0179597	8	0.0672807
Trial 2	M2-4	C-P	M	0:00:07.182-0:00:07.448	BL	0.0830739	8	0.311213
Trial 2	M2-4	C-P	M	0:00:07.448-0:00:07.714	BL	0.0678277	8	0.2541
Trial 2	M2-4	C-P	M	0:00:07.714-0:00:07.980	BL	0.138265	8	0.517976
Trial 2	M2-4	C-P	M	0:00:07.980-0:00:08.246	BL	0.104235	8	0.390492
Trial 2	M2-4	C-P	M	0:00:08.246-0:00:08.512	BL	0.0761494	8	0.285276
Trial 2	M2-4	C-P	M	0:00:08.512-0:00:08.778	BL	0.0681851	8	0.255437
Trial 2	M2-4	C-P	M	0:00:08.778-0:00:09.044	BL	0.138391	8	0.518448
Trial 2	M2-4	C-P	M	0:00:09.044-0:00:09.310	BL	0.0981808	8	0.367808
Trial 2	M2-4	C-P	M	0:00:09.310-0:00:09.576	BL	0.0597622	7	0.255866
Trial 2	M2-4	C-P	M	0:00:09.576-0:00:09.842	BL	0.090308	8	0.338318
Trial 2	M2-4	C-P	M	0:00:09.842-0:00:10.108	BL	0.0751836	8	0.281657
Trial 2	M2-4	C-P	M	0:00:10.108-0:00:10.374	BL	0.112841	8	0.422729
Trial 2	M2-4	C-P	M	0:00:10.374-0:00:10.640	BL	0.066467	8	0.249004
Trial 2	M2-4	C-P	M	0:00:10.640-0:00:10.906	BL	0.0570957	8	0.213895
Trial 2	M2-4	C-P	M	0:00:10.906-0:00:11.172	BL	0.0262361	8	0.0982872
Trial 2	M2-4	C-P	M	0:00:11.172-0:00:11.438	BL	0.018957	8	0.0710172
Trial 2	M2-4	C-P	M	0:00:11.438-0:00:11.704	BL	0.0164423	8	0.0615978
Trial 2	M2-4	C-P	M	0:00:11.704-0:00:11.970	BL	0.0316251	8	0.118477
Trial 2	M2-4	C-P	M	0:00:11.970-0:00:12.236	BL	0.0679123	8	0.25442
Trial 2	M2-4	C-P	M	0:00:12.236-0:00:12.502	BL	0.101483	8	0.380177
Trial 2	M2-4	C-P	M	0:00:12.502-0:00:12.768	BL	0.0763303	8	0.28595
Trial 2	M2-4	C-P	M	0:00:12.768-0:00:13.034	BL	0.0531775	8	0.199215
Trial 2	M2-4	C-P	M	0:00:13.034-0:00:13.300	BL	0.050046	8	0.187485
Trial 2	M2-4	C-P	M	0:00:13.300-0:00:13.566	BL	0.0357099	8	0.133778
Trial 2	M2-4	C-P	M	0:00:13.566-0:00:13.832	BL	0.0994512	8	0.372572
Trial 2	M2-4	C-P	M	0:00:13.832-0:00:14.098	BL	0.0681327	8	0.255242
Trial 2	M2-4	C-P	M	0:00:14.098-0:00:14.364	BL	0.106889	8	0.40043
Trial 2	M2-4	C-P	M	0:00:14.364-0:00:14.630	BL	0.0566569	8	0.212255
Trial 2	M2-4	C-P	M	0:00:14.630-0:00:14.896	BL	0.0970493	8	0.363571
Trial 2	M2-4	C-P	M	0:00:14.896-0:00:15.162	BL	0.10476	8	0.392458
Trial 2	M2-4	C-P	M	0:00:15.162-0:00:15.428	BL	0.110053	8	0.412287
Trial 2	M2-4	C-P	M	0:00:15.428-0:00:15.694	BL	0.0680188	8	0.254814
Trial 2	M2-4	C-P	M	0:00:15.694-0:00:15.960	BL	0.105085	8	0.393675
Trial 2	M2-4	C-P	M	0:00:15.960-0:00:16.226	BL	0.111806	8	0.418854
Trial 2	M2-4	C-P	M	0:00:16.226-0:00:16.492	BL	0.0853702	8	0.319818
Trial 2	M2-4	C-P	M	0:00:16.492-0:00:16.758	BL	0.120444	8	0.451213
Trial 2	M2-4	C-P	M	0:00:16.758-0:00:17.024	BL	0.0576263	8	0.215882
Trial 2	M2-4	C-P	M	0:00:17.024-0:00:17.290	BL	0.0660711	8	0.247521
Trial 2	M2-4	C-P	M	0:00:17.290-0:00:17.556	BL	0.0652341	8	0.244381
Trial 2	M2-4	C-P	M	0:00:17.556-0:00:17.822	BL	0.0596582	8	0.223495
Trial 2	M2-4	C-P	M	0:00:17.822-0:00:18.088	BL	0.107483	8	0.402659
Trial 2	M2-4	C-P	M	0:00:18.088-0:00:18.354	BL	0.0591651	8	0.221646
Trial 2	M2-4	C-P	M	0:00:18.354-0:00:18.620	BL	0.0219173	8	0.0821082
Trial 2	M2-4	C-P	M	0:00:18.620-0:00:18.886	BL	0.285479	8	1.06949
Trial 2	M2-4	C-P	M	0:00:18.886-0:00:19.152	BL	0.142696	7	0.610945
Trial 2	M2-4	C-P	M	0:00:19.152-0:00:19.418	BL	0.169537	8	0.635127
Trial 2	M2-4	C-P	M	0:00:19.418-0:00:19.684	BL	0.213754	8	0.800772
Trial 2	M2-4	C-P	M	0:00:19.684-0:00:19.950	BL	0.211321	8	0.791666
Trial 2	M2-4	C-P	M	0:00:19.950-0:00:20.216	BL	0.216151	8	0.809755
Trial 2	M2-4	C-P	M	0:00:20.216-0:00:20.482	BL	0.251807	8	0.943334
Trial 2	M2-4	C-P	M	0:00:20.482-0:00:20.748	BL	0.0963776	8	0.361056
Trial 2	M2-4	C-P	M	0:00:20.748-0:00:21.014	BL	0.164508	8	0.616289
Trial 2	M2-4	C-P	M	0:00:21.014-0:00:21.280	BL	0.133197	8	0.498989
Trial 2	M2-4	C-P	M	0:00:21.280-0:00:21.546	BL	0.157057	8	0.588371
Trial 2	M2-4	C-P	M	0:00:21.546-0:00:21.812	BL	0.0991898	8	0.37159
Trial 2	M2-4	C-P	M	0:00:21.812-0:00:22.078	BL	0.0665309	8	0.249242
Trial 2	M2-4	C-P	M	0:00:22.078-0:00:22.344	BL	0.17539	8	0.657047
Trial 2	M2-4	C-P	M	0:00:22.344-0:00:22.610	BL	0.114761	8	0.429925
Trial 2	M2-4	C-P	M	0:00:22.610-0:00:22.876	BL	0.143704	8	0.538354
Trial 2	M2-4	C-P	M	0:00:22.876-0:00:23.142	BL	0.0204367	8	0.0765613
Trial 2	M2-4	C-P	M	0:00:23.142-0:00:23.408	BL	0.0132743	8	0.0497289
Trial 2	M2-4	C-P	M	0:00:23.408-0:00:23.674	BL	0.0621402	8	0.232791
Trial 2	M2-4	C-P	M	0:00:23.674-0:00:23.940	BL	0.0701258	8	0.262709
Trial 2	M2-4	C-P	M	0:00:23.940-0:00:24.206	BL	0.114229	8	0.427928
Trial 2	M2-4	C-P	M	0:00:24.206-0:00:24.472	BL	0.0372407	8	0.139513
Trial 2	M2-4	C-P	M	0:00:24.472-0:00:24.738	BL	0.0461541	8	0.172903
Trial 2	M2-4	C-P	M	0:00:24.738-0:00:25.004	BL	0.134622	8	0.504328
Trial 2	M2-4	C-P	M	0:00:25.004-0:00:25.270	BL	0.0646504	8	0.242196
Trial 2	M2-4	C-P	M	0:00:25.270-0:00:25.536	BL	0.0809295	8	0.303179
Trial 2	M2-4	C-P	M	0:00:25.536-0:00:25.802	BL	0.0231461	8	0.0867118
Trial 2	M2-4	C-P	M	0:00:25.802-0:00:26.068	BL	0.0579061	8	0.216933
Trial 2	M2-4	C-P	M	0:00:26.068-0:00:26.334	BL	0.0543951	8	0.203778
Trial 2	M2-4	C-P	M	0:00:26.334-0:00:26.600	BL	0.0404188	8	0.151421
Trial 2	M2-4	C-P	M	0:00:26.600-0:00:26.866	BL	0	8	0
Trial 2	M2-4	C-P	M	0:00:26.866-0:00:27.132	BL	0.0271001	8	0.101524
Trial 2	M2-4	C-P	M	0:00:27.132-0:00:27.398	BL	0.106033	8	0.397229
Trial 2	M2-4	C-P	M	0:00:27.398-0:00:27.664	BL	0.0546983	8	0.204913
Trial 2	M2-4	C-P	M	0:00:27.664-0:00:27.930	BL	0.0298661	8	0.111888
Trial 2	M2-4	C-P	M	0:00:27.930-0:00:28.196	BL	0.0416698	8	0.156105
Trial 2	M2-4	C-P	M	0:00:28.196-0:00:28.462	BL	0.0138338	8	0.0518245
Trial 2	M2-4	C-P	M	0:00:28.462-0:00:28.728	BL	0.0332609	7	0.142404
Trial 2	M2-4	C-P	M	0:00:28.728-0:00:28.994	BL	0.0495429	8	0.185603
Trial 2	M2-4	C-P	M	0:00:28.994-0:00:29.260	BL	0	8	0
Trial 2	M2-4	C-P	M	0:00:29.260-0:00:29.526	BL	0.126001	8	0.472035
Trial 2	M2-4	C-P	M	0:00:29.526-0:00:29.792	BL	0.0190254	8	0.0712732
Trial 2	M2-4	C-P	M	0:00:29.792-0:00:30.058	BL	0.0912404	8	0.341807
Trial 2	M2-4	C-P	M	0:00:30.058-0:00:30.324	BL	0.144329	8	0.540693
Trial 2	M2-4	C-P	M	0:00:30.324-0:00:30.590	BL	0.275952	8	1.03378
Trial 2	M2-4	C-P	M	0:00:30.590-0:00:30.856	BL	0.208261	8	0.7802
Trial 2	M2-4	C-P	M	0:00:30.856-0:00:31.122	BL	0.173095	8	0.648457
Trial 2	M2-4	C-P	M	0:00:31.122-0:00:31.388	BL	0.351549	8	1.31698
Trial 2	M2-4	C-P	M	0:00:31.388-0:00:31.654	BL	0.268652	8	1.00644
Trial 2	M2-4	C-P	M	0:00:31.654-0:00:31.920	BL	0.257667	8	0.965281
Trial 2	M2-4	C-P	M	0:00:31.920-0:00:32.186	BL	0.216375	8	0.810598
Trial 2	M2-4	C-P	M	0:00:32.186-0:00:32.452	BL	0.202305	8	0.757882
Trial 2	M2-4	C-P	M	0:00:32.452-0:00:32.718	BL	0.37727	8	1.41335
Trial 2	M2-4	C-P	M	0:00:32.718-0:00:32.984	BL	0.221887	8	0.831248
Trial 2	M2-4	C-P	M	0:00:32.984-0:00:33.250	BL	0.139596	8	0.522962
Trial 2	M2-4	C-P	M	0:00:33.250-0:00:33.516	BL	0.0370934	8	0.138962
Trial 2	M2-4	C-P	M	0:00:33.516-0:00:33.782	BL	0.0611292	8	0.229003
Trial 2	M2-4	C-P	M	0:00:33.782-0:00:34.048	BL	0.0565293	8	0.211771
Trial 2	M2-4	C-P	M	0:00:34.048-0:00:34.314	BL	0.160739	8	0.602166
Trial 2	M2-4	C-P	M	0:00:34.314-0:00:34.580	BL	0.149569	8	0.560317
Trial 2	M2-4	C-P	M	0:00:34.580-0:00:34.846	BL	0.154119	8	0.577377
Trial 2	M2-4	C-P	M	0:00:34.846-0:00:35.112	BL	0.122833	8	0.46016
Trial 2	M2-4	C-P	M	0:00:35.112-0:00:35.378	BL	0.0224759	8	0.0842011
Trial 2	M2-4	C-P	M	0:00:35.378-0:00:35.644	BL	0.0650574	8	0.243719
Trial 2	M2-4	C-P	M	0:00:35.644-0:00:35.910	BL	0.114464	8	0.428806
Trial 2	M2-4	C-P	M	0:00:35.910-0:00:36.176	BL	0.105527	8	0.395329
Trial 2	M2-4	C-P	M	0:00:36.176-0:00:36.442	BL	0.0562148	8	0.210595
Trial 2	M2-4	C-P	M	0:00:36.442-0:00:36.708	BL	0.0479733	8	0.179719
Trial 2	M2-4	C-P	M	0:00:36.708-0:00:36.974	BL	0.028428	8	0.106498
Trial 2	M2-4	C-P	M	0:00:36.974-0:00:37.240	BL	0.0661997	8	0.247998
Trial 2	M2-4	C-P	M	0:00:37.240-0:00:37.506	BL	0.0496616	8	0.186044
Trial 2	M2-4	C-P	M	0:00:37.506-0:00:37.772	BL	0.0897825	8	0.336345
Trial 2	M2-4	C-P	M	0:00:37.772-0:00:38.038	BL	0.0693926	7	0.297101
Trial 2	M2-4	C-P	M	0:00:38.038-0:00:38.304	BL	0.0427664	8	0.160216
Trial 2	M2-4	C-P	M	0:00:38.304-0:00:38.570	BL	0.0803315	8	0.300944
Trial 2	M2-4	C-P	M	0:00:38.570-0:00:38.836	BL	0.0588051	8	0.220299
Trial 2	M2-4	C-P	M	0:00:38.836-0:00:39.102	BL	0.0597499	8	0.22384
Trial 2	M2-4	C-P	M	0:00:39.102-0:00:39.368	BL	0.117233	8	0.439185
Trial 2	M2-4	C-P	M	0:00:39.368-0:00:39.634	BL	0.152821	8	0.572508
Trial 2	M2-4	C-P	M	0:00:39.634-0:00:39.900	BL	0.0633718	8	0.237406
Trial 2	M2-4	C-P	M	0:00:39.900-0:00:40.166	BL	0.142912	8	0.53539
Trial 2	M2-4	C-P	M	0:00:40.166-0:00:40.432	BL	0.143184	8	0.536401
Trial 2	M2-4	C-P	M	0:00:40.432-0:00:40.698	BL	0.0345332	8	0.129371
Trial 2	M2-4	C-P	M	0:00:40.698-0:00:40.964	BL	0.144056	8	0.539673
Trial 2	M2-4	C-P	M	0:00:40.964-0:00:41.230	BL	0.0872106	8	0.326711
Trial 2	M2-4	C-P	M	0:00:41.230-0:00:41.496	BL	0.252446	8	0.945722
Trial 2	M2-4	C-P	M	0:00:41.496-0:00:41.762	BL	0.150562	8	0.564052
Trial 2	M2-4	C-P	M	0:00:41.762-0:00:42.028	BL	0.0590745	8	0.221307
Trial 2	M2-4	C-P	M	0:00:42.028-0:00:42.294	BL	0.116748	8	0.437366
Trial 2	M2-4	C-P	M	0:00:42.294-0:00:42.560	BL	0.130366	8	0.488387
Trial 2	M2-4	C-P	M	0:00:42.560-0:00:42.826	BL	0.112432	8	0.421201
Trial 2	M2-4	C-P	M	0:00:42.826-0:00:43.092	BL	0.0511733	8	0.191709
Trial 2	M2-4	C-P	M	0:00:43.092-0:00:43.358	BL	0.154848	8	0.580094
Trial 2	M2-4	C-P	M	0:00:43.358-0:00:43.624	BL	0.017872	8	0.0669529
Trial 2	M2-4	C-P	M	0:00:43.624-0:00:43.890	BL	0.104671	8	0.392125
Trial 2	M2-4	C-P	M	0:00:43.890-0:00:44.156	BL	0.102005	8	0.382143
Trial 2	M2-4	C-P	M	0:00:44.156-0:00:44.422	BL	0.0343774	8	0.128788
Trial 2	M2-4	C-P	M	0:00:44.422-0:00:44.688	BL	0.198157	8	0.742351
Trial 2	M2-4	C-P	M	0:00:44.688-0:00:44.954	BL	0.31997	8	1.19869
Trial 2	M2-4	C-P	M	0:00:44.954-0:00:45.220	BL	0.24097	8	0.902728
Trial 2	M2-4	C-P	M	0:00:45.220-0:00:45.486	BL	0.0462733	8	0.173352
Trial 2	M2-4	C-P	M	0:00:45.486-0:00:45.752	BL	0.269073	8	1.00802
Trial 2	M2-4	C-P	M	0:00:45.752-0:00:46.018	BL	0.0524364	8	0.196444
Trial 2	M2-4	C-P	M	0:00:46.018-0:00:46.284	BL	0.0620401	8	0.232422
Trial 2	M2-4	C-P	M	0:00:46.284-0:00:46.550	BL	0.0717985	8	0.268979
Trial 2	M2-4	C-P	M	0:00:46.550-0:00:46.816	BL	0.11764	8	0.44071
Trial 2	M2-4	C-P	M	0:00:46.816-0:00:47.082	BL	0.16774	8	0.628391
Trial 2	M2-4	C-P	M	0:00:47.082-0:00:47.348	BL	0.175597	8	0.657828
Trial 2	M2-4	C-P	M	0:00:47.348-0:00:47.614	BL	0.292246	7	1.25124
Trial 2	M2-4	C-P	M	0:00:47.614-0:00:47.880	BL	0.212308	8	0.795361
Trial 2	M2-4	C-P	M	0:00:47.880-0:00:48.146	BL	0.245807	8	0.920853
Trial 2	M2-4	C-P	M	0:00:48.146-0:00:48.412	BL	0.241997	8	0.906578
Trial 2	M2-4	C-P	M	0:00:48.412-0:00:48.678	BL	0.153093	8	0.573524
Trial 2	M2-4	C-P	M	0:00:48.678-0:00:48.944	BL	0.0991301	8	0.371365
Trial 2	M2-4	C-P	M	0:00:48.944-0:00:49.210	BL	0.22402	8	0.839239
Trial 2	M2-4	C-P	M	0:00:49.210-0:00:49.476	BL	0.106361	8	0.398454
Trial 2	M2-4	C-P	M	0:00:49.476-0:00:49.742	BL	0.234572	8	0.878765
Trial 2	M2-4	C-P	M	0:00:49.742-0:00:50.008	BL	0.194565	8	0.728891
Trial 2	M2-4	C-P	M	0:00:50.008-0:00:50.274	BL	0.104301	8	0.390733
Trial 2	M2-4	C-P	M	0:00:50.274-0:00:50.540	BL	0.309203	8	1.15835
Trial 2	M2-4	C-P	M	0:00:50.540-0:00:50.806	BL	0.165688	8	0.620704
Trial 2	M2-4	C-P	M	0:00:50.806-0:00:51.072	BL	0.310584	8	1.16352
Trial 2	M2-4	C-P	M	0:00:51.072-0:00:51.338	BL	0.0900895	8	0.337499
Trial 2	M2-4	C-P	M	0:00:51.338-0:00:51.604	BL	0.0984707	8	0.368896
Trial 2	M2-4	C-P	M	0:00:51.604-0:00:51.870	BL	0.0749902	8	0.280932
Trial 2	M2-4	C-P	M	0:00:51.870-0:00:52.136	BL	0.141679	8	0.530763
Trial 2	M2-4	C-P	M	0:00:52.136-0:00:52.402	BL	0.198113	8	0.742174
Trial 2	M2-4	C-P	M	0:00:52.402-0:00:52.668	BL	0.172297	8	0.645467
Trial 2	M2-4	C-P	M	0:00:52.668-0:00:52.934	BL	0.0773882	8	0.289918
Trial 2	M2-4	C-P	M	0:00:52.934-0:00:53.200	BL	0.182837	8	0.684952
Trial 2	M2-4	C-P	M	0:00:53.200-0:00:53.466	BL	0.156995	8	0.588136
Trial 2	M2-4	C-P	M	0:00:53.466-0:00:53.732	BL	0.192693	8	0.721878
Trial 2	M2-4	C-P	M	0:00:53.732-0:00:53.998	BL	0.11188	8	0.419135
Trial 2	M2-4	C-P	M	0:00:53.998-0:00:54.264	BL	0.08645	8	0.323862
Trial 2	M2-4	C-P	M	0:00:54.264-0:00:54.530	BL	0.0695621	8	0.260597
Trial 2	M2-4	C-P	M	0:00:54.530-0:00:54.796	BL	0.0461198	8	0.172776
Trial 2	M2-4	C-P	M	0:00:54.796-0:00:55.062	BL	0.0953197	8	0.357091
Trial 2	M2-4	C-P	M	0:00:55.062-0:00:55.328	BL	0.176632	8	0.661712
Trial 2	M2-4	C-P	M	0:00:55.328-0:00:55.594	BL	0.141763	8	0.531079
Trial 2	M2-4	C-P	M	0:00:55.594-0:00:55.860	BL	0.146057	8	0.547172
Trial 2	M2-4	C-P	M	0:00:55.860-0:00:56.126	BL	0.120595	8	0.451784
Trial 2	M2-4	C-P	M	0:00:56.126-0:00:56.392	BL	0.0924418	8	0.346307
Trial 2	M2-4	C-P	M	0:00:56.392-0:00:56.658	BL	0.16933	8	0.634351
Trial 2	M2-4	C-P	M	0:00:56.658-0:00:56.924	BL	0.0748522	8	0.280413
Trial 2	M2-4	C-P	M	0:00:56.924-0:00:57.190	BL	0.144106	7	0.616975
Trial 2	M2-4	C-P	M	0:00:57.190-0:00:57.456	BL	0.0947938	8	0.355122
Trial 2	M2-4	C-P	M	0:00:57.456-0:00:57.722	BL	0.122583	8	0.459225
Trial 2	M2-4	C-P	M	0:00:57.722-0:00:57.988	BL	0.179612	8	0.672876
Trial 2	M2-4	C-P	M	0:00:57.988-0:00:58.254	BL	0.0793983	8	0.297448
Trial 2	M2-4	C-P	M	0:00:58.254-0:00:58.520	BL	0.127464	8	0.47751
Trial 2	M2-4	C-P	M	0:00:58.520-0:00:58.786	BL	0.151276	8	0.566713
Trial 2	M2-4	C-P	M	0:00:58.786-0:00:59.052	BL	0.216895	8	0.812544
Trial 2	M2-4	C-P	M	0:00:59.052-0:00:59.318	BL	0.073076	8	0.273762
Trial 2	M2-4	C-P	M	0:00:59.318-0:00:59.584	BL	0.103283	8	0.386927
Trial 2	M2-4	C-P	M	0:00:59.584-0:00:59.850	BL	0.148332	8	0.555683
Trial 2	M2-4	C-P	M	0:00:59.850-0:01:00.116	BL	0.0856593	8	0.3209
Trial 2	M2-4	C-P	M	0:01:00.116-0:01:00.382	BL	0.0747478	8	0.280024
Trial 2	M2-4	C-P	M	0:01:00.382-0:01:00.648	BL	0.0676736	8	0.253522
Trial 2	M2-4	C-P	M	0:01:00.648-0:01:00.914	BL	0.128372	8	0.480913
Trial 2	M2-4	C-P	M	0:01:00.914-0:01:01.180	BL	0.167923	8	0.62908
Trial 2	M2-4	C-P	M	0:01:01.180-0:01:01.446	BL	0.113242	8	0.424233
Trial 2	M2-4	C-P	M	0:01:01.446-0:01:01.712	BL	0.0310165	8	0.116196
Trial 2	M2-4	C-P	M	0:01:01.712-0:01:01.978	BL	0.107821	8	0.403927
Trial 2	M2-4	C-P	M	0:01:01.978-0:01:02.244	BL	0.0746316	8	0.279588
Trial 2	M2-4	C-P	M	0:01:02.244-0:01:02.510	BL	0.0839683	8	0.314566
Trial 2	M2-4	C-P	M	0:01:02.510-0:01:02.776	BL	0.072521	8	0.271682
Trial 2	M2-4	C-P	M	0:01:02.776-0:01:03.042	BL	0.131179	8	0.49143
Trial 2	M2-4	C-P	M	0:01:03.042-0:01:03.308	BL	0.0472827	8	0.177133
Trial 2	M2-4	C-P	M	0:01:03.308-0:01:03.574	BL	0.0578596	8	0.216756
Trial 2	M2-4	C-P	M	0:01:03.574-0:01:03.840	BL	0.181839	8	0.681211
Trial 2	M2-4	C-P	M	0:01:03.840-0:01:04.106	BL	0.0803996	8	0.301199
Trial 2	M2-4	C-P	M	0:01:04.106-0:01:04.372	BL	0.139118	8	0.521169
Trial 2	M2-4	C-P	M	0:01:04.372-0:01:04.638	BL	0.0539429	8	0.202084
Trial 2	M2-4	C-P	M	0:01:04.638-0:01:04.904	BL	0.0698205	8	0.261568
Trial 2	M2-4	C-P	M	0:01:04.904-0:01:05.170	BL	0.0763009	8	0.285841
Trial 2	M2-4	C-P	M	0:01:05.170-0:01:05.436	BL	0.204322	8	0.765439
Trial 2	M2-4	C-P	M	0:01:05.436-0:01:05.702	BL	0.218129	8	0.817169
Trial 2	M2-4	C-P	M	0:01:05.702-0:01:05.968	BL	0.0295261	8	0.110611
Trial 2	M2-4	C-P	M	0:01:05.968-0:01:06.234	BL	0.125771	8	0.471172
Trial 2	M2-4	C-P	M	0:01:06.234-0:01:06.500	BL	0.113842	8	0.426481
Trial 2	M2-4	C-P	M	0:01:06.500-0:01:06.766	BL	0.0567952	7	0.243162
Trial 2	M2-4	C-P	M	0:01:06.766-0:01:07.032	BL	0.0759424	8	0.284498
Trial 2	M2-4	C-P	M	0:01:07.032-0:01:07.298	BL	0.0599508	8	0.224589
Trial 2	M2-4	C-P	M	0:01:07.298-0:01:07.564	BL	0.109317	8	0.40953
Trial 2	M2-4	C-P	M	0:01:07.564-0:01:07.830	BL	0.100843	8	0.377785
Trial 2	M2-4	C-P	M	0:01:07.830-0:01:08.096	BL	0.138443	8	0.518642
Trial 2	M2-4	C-P	M	0:01:08.096-0:01:08.362	BL	0.0562656	8	0.210785
Trial 2	M2-4	C-P	M	0:01:08.362-0:01:08.628	BL	0.101245	8	0.379291
Trial 2	M2-4	C-P	M	0:01:08.628-0:01:08.894	BL	0.0847891	8	0.317642
Trial 2	M2-4	C-P	M	0:01:08.894-0:01:09.160	BL	0.0954581	8	0.35761
Trial 2	M2-4	C-P	M	0:01:09.160-0:01:09.426	BL	0.0935196	8	0.350348
Trial 2	M2-4	C-P	M	0:01:09.426-0:01:09.692	BL	0.0846846	8	0.317248
Trial 2	M2-4	C-P	M	0:01:09.692-0:01:09.958	BL	0.128869	8	0.482771
Trial 2	M2-4	C-P	M	0:01:09.958-0:01:10.224	BL	0.153873	8	0.576446
Trial 2	M2-4	C-P	M	0:01:10.224-0:01:10.490	BL	0.0831641	8	0.311554
[truncated: 53,365 more rows]
