# Supplementary material for: Conditional and unconditional components of aversively motivated freezing, flight and darting in mice
Source: eLife. 2022 May 26;11:e75663. doi: 10.7554/eLife.75663 (PMC9173745; doi:10.7554/eLife.75663)
Supplement: Figure 9—source data 1. [file elife-75663-fig9-data1.xlsx]

## Sheet: Combined Darts
Analysis of Dart Timing & Magnitude
Extracted manually from the raw velocity data extracted via Ethovision
Data are included for all animals which receieved shock (n = 102) across all experiments and groups
Darts were assigned as occurring during the first 3, middle 4, or last 3 seconds of the 10s CS. The middle 4 and last 3 seconds were combined for graphing and statistical analyses into a late CS period
Data were also extracted and organized for all CS periods in which an inividual animal made 2 darts to a given single CS (n= 65 multi-darts)
As seen in Figure 9
						First 3s								Middle 4s								Last 3s									First Dart	Second Dart		NOISE	TONE
Experiment	Animal	Group	Sex	CS	Tone/Noise	MaxVelD1		Experiment	Animal	Group	Sex	CS	Tone/Noise	MaxVelD2		Experiment	Animal	Group	Sex	CS	Tone/Noise	MaxVelD3		Experiment	Animal	Group	Sex	CS	Tone/Noise	#Darts	MaxVelD1	MaxVelD2		FULL LIST	FULL LIST
1	4.2	Rep	F	CS10b	Noise	27.8331		1	4.2	Rep	F	CS8b	Noise	25.6445		1	4.2	Rep	F	CS8b	Noise	32.4063		1	6.3	Rep	F	CS11b	Noise	2	29.4334	30.9379		23.2385	23.2205
1	6.3	Rep	F	CS11b	Noise	29.4334		1	6.3	Rep	F	CS13b	Noise	25.9347		1	4.3	Rep	F	CS2b	Noise	24.3292		1	6.3	Rep	F	CS12b	Noise	2	32.2338	37.1944		23.2791	23.3659
1	6.3	Rep	F	CS12b	Noise	32.2338		1	6.3	Rep	F	CS11b	Noise	30.9379		1	1.3	Rep	M	CS1b	Noise	29.2721		1	1.3	Rep	M	CS1b	Noise	2	26.3906	29.2721		23.289	23.6641
1	4.2	Rep	F	CS13b	Noise	30.8038		1	6.3	Rep	F	CS14b	Noise	35.8111		1	1.3	Rep	M	CS12b	Noise	34.2762		1	2.2	Rep	M	CS1b	Noise	2	45.3173	52.5678		23.3136	23.6744
1	6.3	Rep	F	CS16b	Noise	46.1858		1	6.3	Rep	F	CS12b	Noise	37.1944		1	2.1	Rep	M	CS8b	Noise	27.8982		1	2.2	Rep	M	CS4b	Noise	2	56.0562	36.1575		23.4588	24.0223
1	4.2	Rep	F	CS1b	Noise	31.1322		1	1.3	Rep	M	CS1b	Noise	26.3906		1	2.1	Rep	M	CS13b	Noise	31.4609		1	6.2	StimCh	F	CS2b	Noise	2	25.5623	33.2355		23.5484	24.262
1	4.3	Rep	F	CS3b	Noise	24.7486		1	1.3	Rep	M	CS2b	Noise	32.2035		1	2.2	Rep	M	CS11b	Noise	31.0712		1	6.2	StimCh	F	CS3b	Noise	2	59.5174	124.472		23.6882	24.3757
1	4.3	Rep	F	CS4b	Noise	41.4831		1	2.2	Rep	M	CS14b	Noise	28.627		1	2.2	Rep	M	CS4b	Noise	36.1575		1	6.2	StimCh	F	CS4b	Noise	2	23.9061	31.0345		23.7386	24.8504
1	6.3	Rep	F	CS7b	Noise	27.7122		1	2.2	Rep	M	CS6b	Noise	35.1372		1	6.2	StimCh	F	CS1b	Noise	24.3814		1	6.2	StimCh	F	CS5b	Noise	2	82.5594	23.3136		23.8181	24.9103
1	4.2	Rep	F	CS8b	Noise	26.4134		1	2.2	Rep	M	CS12b	Noise	38.1244		1	6.2	StimCh	F	CS6b	Noise	31.6759		1	3.3	StimCh	M	CS8b	Noise	2	32.7307	28.0929		23.8341	25.3574
1	6.3	Rep	F	CS8b	Noise	32.9959		1	2.2	Rep	M	CS1b	Noise	52.5678		1	6.2	StimCh	F	CS2b	Noise	33.2355		1	3.3	StimCh	M	CS11b	Noise	2	33.7983	29.0508		23.8855	25.5874
1	6.3	Rep	F	CS9b	Noise	33.2076		1	6.1	StimCh	F	CS2b	Noise	26.9059		1	6.2	StimCh	F	CS3b	Noise	124.472		1	2.3	StimCh	M	CS1b	Noise	2	27.5247	27.7051		23.9061	26.6205
1	2.2	Rep	M	CS15b	Noise	33.6115		1	6.2	StimCh	F	CS5b	Noise	23.3136		1	3.3	StimCh	M	CS11b	Noise	29.0508		1	2.3	StimCh	M	CS2b	Noise	2	44.996	25.0248		23.9095	26.8904
1	2.2	Rep	M	CS1b	Noise	45.3173		1	6.2	StimCh	F	CS4b	Noise	31.0345		1	4.1	Temp	F	CS3b	Noise	27.6964		1	4.1	Temp	F	CS1b	Noise	2	31.1159	26.1585		23.9451	26.904
1	2.2	Rep	M	CS3b	Noise	56.6192		1	3.3	StimCh	M	CS8b	Noise	28.0929		1	4.1	Temp	F	CS2b	Noise	30.3457		1	4.1	Temp	F	CS2b	Noise	2	30.3979	30.3457		24.1161	27.0633
1	3.1	Rep	M	CS3b	Noise	78.4255		1	2.3	StimCh	M	CS2b	Noise	25.0248		1	4.1	Temp	F	CS8b	Noise	30.909		1	4.1	Temp	F	CS3b	Noise	2	38.6482	27.6964		24.1446	27.757
1	1.3	Rep	M	CS4b	Noise	32.1084		1	2.3	StimCh	M	CS1b	Noise	27.7051		1	4.1	Temp	F	CS13b	Noise	34.7261		1	4.1	Temp	F	CS4b	Noise	2	34.7009	36.1701		24.1704	27.8074
1	2.2	Rep	M	CS4b	Noise	56.0562		1	6.4	Temp	F	CS12b	Noise	27.599		1	4.1	Temp	F	CS4b	Noise	36.1701		1	5.4	Temp	F	CS7b	Noise	2	40.0153	30.9462		24.1808	28.0875
1	6.1	StimCh	F	CS10b	Noise	23.2791		1	4.1	Temp	F	CS1b	Noise	26.1585		1	5.4	Temp	F	CS7b	Noise	30.9462		1	4.2	Rep	F	CS8b	Noise	3	26.4134	25.6445		24.2333	28.4606
1	6.1	StimCh	F	CS11b	Noise	41.2507		1	4.1	Temp	F	CS5b	Noise	27.8796		1	1.4	Temp	M	CS1b	Noise	31.8686		1	1.1	StimCh	M	CS4a	Tone	2	44.1318	34.2066		24.2412	28.8044
1	6.1	StimCh	F	CS12b	Noise	46.94		1	4.1	Temp	F	CS2b	Noise	30.3979		1	1.4	Temp	M	CS8b	Noise	36.0342		1	2.3	StimCh	M	CS2a	Tone	2	37.4981	28.4606		24.3016	28.9611
1	6.2	StimCh	F	CS12b	Noise	24.5351		1	4.1	Temp	F	CS4b	Noise	34.7009		1	3.4	Temp	M	CS7b	Noise	36.5134		1	2.3	StimCh	M	CS3a	Tone	2	38.4221	33.7558		24.3292	29.1318
1	6.2	StimCh	F	CS14b	Noise	33.3965		1	5.4	Temp	F	CS1b	Noise	38.6073		1	2.4	Temp	M	CS4b	Noise	23.9095		1	2.3	StimCh	M	CS12a	Tone	2	49.3402	51.2583		24.3814	29.6367
1	6.2	StimCh	F	CS2b	Noise	25.5623		1	5.1	Temp	F	CS1b	Noise	23.4588		1	2.4	Temp	M	CS1b	Noise	33.3904		1	6.2	StimCh	F	CS1a	Tone	3	23.2205	28.9611		24.4323	31.3309
1	6.2	StimCh	F	CS3b	Noise	59.5174		1	5.1	Temp	F	CS11b	Noise	31.7177		1	1.2	Temp	M	CS3b	Noise	24.6251		2	5.1	S_TWN	M	CS2b	Noise	2	66.4044	24.8562		24.4395	32.6065
1	6.1	StimCh	F	CS4b	Noise	30.1082		1	1.4	Temp	M	CS9b	Noise	25.0533		1	1.2	Temp	M	CS5b	Noise	39.1699		2	8.1	S_TWN	M	CS5b	Noise	2	72.184	43.2011		24.4827	33.6856
1	6.2	StimCh	F	CS4b	Noise	23.9061		1	3.4	Temp	M	CS8b	Noise	41.5484		1	1.2	Temp	M	CS2b	Noise	40.3765		2	5.4	WNS_TWN	M	CS1b	Noise	2	45.1706	41.0302		24.5351	33.7558
1	6.2	StimCh	F	CS5b	Noise	82.5594		1	3.4	Temp	M	CS4b	Noise	52.2745		1	2.2	Rep	M	CS11a	Tone	26.8904		2	5.4	WNS_TWN	M	CS5b	Noise	2	29.1267	37.599		24.6251	34.2066
1	6.2	StimCh	F	CS8b	Noise	34.5864		1	4.2	Rep	F	CS12a	Tone	39.9842		1	6.2	StimCh	F	CS2a	Tone	23.6641		2	7.4	WNS_TWN	M	CS7b	Noise	3	24.6383	26.0139		24.6383	35.8627
1	2.3	StimCh	M	CS10b	Noise	59.1659		1	4.3	Rep	F	CS2a	Tone	25.5874		1	6.2	StimCh	F	CS1a	Tone	27.0633		2	2.2	S_T	F	CS3b	Tone	2	28.0875	25.3574		24.6989	37.1359
1	3.3	StimCh	M	CS11b	Noise	33.7983		1	2.2	Rep	M	CS10a	Tone	23.3659		1	6.2	StimCh	F	CS13a	Tone	38.4925		2	2.2	S_T	F	CS5b	Tone	2	54.8908	27.8074		24.7486	37.4981
1	2.3	StimCh	M	CS11b	Noise	56.3208		1	6.2	StimCh	F	CS9a	Tone	24.9103		1	6.2	StimCh	F	CS14a	Tone	41.2367		2	2.2	S_T	F	CS11b	Tone	2	31.3309	29.1318		24.7748	38.4221
1	3.3	StimCh	M	CS12b	Noise	46.5383		1	6.2	StimCh	F	CS1a	Tone	28.9611		1	1.1	StimCh	M	CS4a	Tone	34.2066		3	F6	`Paired`	F	CS2a	Noise	2	39.8869	35.7668		24.8562	38.4925
1	2.3	StimCh	M	CS12b	Noise	51.5194		1	3.3	StimCh	M	CS15a	Tone	27.757		1	2.3	StimCh	M	CS2a	Tone	28.4606		3	M1	`Paired`	M	CS1a	Noise	2	39.6798	48.0878		24.8893	39.9842
1	3.3	StimCh	M	CS13b	Noise	48.8044		1	1.1	StimCh	M	CS4a	Tone	44.1318		1	2.3	StimCh	M	CS3a	Tone	33.7558		3	M1	`Paired`	M	CS2a	Noise	2	52.4794	38.8334		24.8992	40.2542
1	3.3	StimCh	M	CS14b	Noise	53.3554		1	2.3	StimCh	M	CS6a	Tone	37.1359		1	2.3	StimCh	M	CS13a	Tone	43.4316		3	M11	`Paired`	M	CS2a	Noise	2	32.9331	36.3834		24.9292	41.1377
1	2.3	StimCh	M	CS14b	Noise	31.4764		1	2.3	StimCh	M	CS11a	Tone	41.1377		1	2.3	StimCh	M	CS12a	Tone	51.2583		3	M16	`Paired`	M	CS2a	Noise	2	30.4512	24.1161		25.0248	41.2367
1	3.3	StimCh	M	CS15b	Noise	42.6278		1	2.3	StimCh	M	CS15a	Tone	41.449		2	5.3	NS_TWN	M	CS15b	Noise	23.8855		3	M14	`Shock Only`	M	CS1a	Noise	2	36.2399	25.1216		25.0529	41.449
1	2.3	StimCh	M	CS15b	Noise	55.579		1	2.3	StimCh	M	CS5a	Tone	47.2613		2	6.3	NS_TWN	M	CS6b	Noise	24.4827		3	M8	`Shock Only`	M	CS1a	Noise	2	32.0136	27.2455		25.0533	43.4316
1	3.3	StimCh	M	CS16b	Noise	52.245		2	3.3	NS_TWN	F	CS1b	Noise	51.8037		2	6.1	S_TWN	M	CS8b	Noise	35.605		3	F10	`Unpaired`	F	CS2a	Noise	2	33.4521	37.3511		25.0645	44.1318
1	2.3	StimCh	M	CS16b	Noise	59.04		2	4.3	NS_TWN	F	CS12b	Noise	32.7407		2	6.1	S_TWN	M	CS12b	Noise	51.5618		3	F5	`Unpaired`	F	CS1a	Noise	2	40.8889	30.6375		25.0968	47.2613
1	3.3	StimCh	M	CS1b	Noise	38.2831		2	2.1	S_TWN	F	CS13b	Noise	26.9725		2	4.4	WNS_TWN	F	CS4b	Noise	36.3118		3	M5	`Unpaired`	M	CS1a	Noise	2	39.4909	39.3396		25.1216	49.3402
1	2.3	StimCh	M	CS1b	Noise	27.5247		2	2.1	S_TWN	F	CS1b	Noise	37.2477		2	5.4	WNS_TWN	M	CS10b	Noise	39.6455		3	M5	`Unpaired`	M	CS2a	Noise	2	53.0712	29.6785		25.2365	49.4287
1	3.3	StimCh	M	CS2b	Noise	77.2963		2	3.1	S_TWN	F	CS9b	Noise	30.0875		2	5.4	WNS_TWN	M	CS1b	Noise	41.0302		3	F11	`Paired`	F	CS1a	Noise	3	39.0081	28.9136		25.2637	51.2583
1	2.3	StimCh	M	CS2b	Noise	44.996		2	5.1	S_TWN	M	CS2b	Noise	24.8562		2	5.4	WNS_TWN	M	CS4b	Noise	49.2079		3	F6	`Paired`	F	CS1a	Noise	3	106.015	35.545		25.2771	53.1608
1	3.3	StimCh	M	CS3b	Noise	131.071		2	6.1	S_TWN	M	CS13b	Noise	44.5778		2	5.4	WNS_TWN	M	CS6b	Noise	53.2875		3	M11	`Paired`	M	CS1a	Noise	3	36.9878	58.5728		25.4559	53.7378
1	2.3	StimCh	M	CS3b	Noise	31.2184		2	4.4	WNS_TWN	F	CS9b	Noise	33.2712		2	5.4	WNS_TWN	M	CS12b	Noise	60.9002		3	F5	`Unpaired`	F	CS2a	Noise	3	40.0016	61.9813		25.5623	54.8908
1	3.3	StimCh	M	CS4b	Noise	69.4401		2	5.4	WNS_TWN	M	CS5b	Noise	37.599		2	7.4	WNS_TWN	M	CS9b	Noise	23.5484		3	F3	`Shock Only`	F	CS2a	Noise	3*	28.2081	32.8489		25.575	56.2908
1	1.1	StimCh	M	CS4b	Noise	26.3938		2	5.4	WNS_TWN	M	CS1b	Noise	45.1706		2	7.4	WNS_TWN	M	CS12b	Noise	24.1446		4	F4-3	C-P	F	CS1b	Noise	2	40.8695	29.4952		25.6445
1	2.3	StimCh	M	CS4b	Noise	43.1444		2	7.4	WNS_TWN	M	CS7b	Noise	24.6383		2	7.4	WNS_TWN	M	CS7b	Noise	28.1357		4	M1-2	C-P	M	CS2b	Noise	2	47.5028	36.8984		25.9347
1	2.3	StimCh	M	CS5b	Noise	50.5098		2	7.4	WNS_TWN	M	CS7b	Noise	26.0139		2	2.2	S_T	F	CS5b	Tone	27.8074		4	M2-4	C-P	M	CS1b	Noise	2	40.4652	44.5698		25.9881
1	2.3	StimCh	M	CS6b	Noise	49.9224		2	7.4	WNS_TWN	M	CS13b	Noise	29.3807		2	2.2	S_T	F	CS11b	Tone	29.1318		4	M3-2	C-P	M	CS2b	Noise	2	45.0651	24.4323		26.0139
1	3.3	StimCh	M	CS7b	Noise	32.2069		2	7.4	WNS_TWN	M	CS8b	Noise	29.45		3	F11	`Paired`	F	CS1a	Noise	42.1977		4	F1-1	C-S	F	CS1b	Noise	2	40.6621	24.9292		26.1585
1	2.3	StimCh	M	CS7b	Noise	28.7447		2	8.4	WNS_TWN	M	CS10b	Noise	29.6522		3	F16	`Paired`	F	CS1a	Noise	23.8181		4	F1-1	C-S	F	CS3b	Noise	2	41.0468	36.4631		26.2366
1	3.3	StimCh	M	CS8b	Noise	32.7307		2	8.4	WNS_TWN	M	CS13b	Noise	32.8353		3	F6	`Paired`	F	CS1a	Noise	23.6882		4	F3-3	C-S	F	CS2b	Noise	2	28.8574	40.0333		26.2584
1	2.3	StimCh	M	CS8b	Noise	41.0648		2	1.2	S_T	F	CS5b	Tone	24.8504		3	F6	`Paired`	F	CS2a	Noise	35.7668		4	M1-1	C-S	M	CS3b	Noise	2	39.9898	44.4775		26.3906
1	2.3	StimCh	M	CS9b	Noise	55.6366		2	2.2	S_T	F	CS3b	Tone	25.3574		3	M11	`Paired`	M	CS2a	Noise	36.3834		4	F1-4	W-P	F	CS3b	Noise	2	54.0158	29.2577		26.3938
1	4.1	Temp	F	CS10b	Noise	41.6735		2	2.2	S_T	F	CS11b	Tone	31.3309		3	M11	`Paired`	M	CS1a	Noise	45.1523		4	M1-4	W-P	M	CS3b	Noise	2	31.1384	23.2385		26.4134
1	4.1	Temp	F	CS11b	Noise	25.0968		2	2.2	S_T	F	CS8b	Tone	56.2908		3	M16	`Paired`	M	CS2a	Noise	24.1161		4	M2-1	W-P	M	CS1b	Noise	2	50.8439	26.9129		26.5872
1	4.1	Temp	F	CS12b	Noise	27.3683		2	6.2	S_T	M	CS15b	Tone	26.6205		3	F10	`Unpaired`	F	CS2a	Noise	37.3511		4	M2-1	W-P	M	CS2b	Noise	2	25.4559	35.6272		26.8357
1	6.4	Temp	F	CS14b	Noise	28.926		2	6.2	S_T	M	CS7b	Tone	35.8627		3	F5	`Unpaired`	F	CS1a	Noise	30.6375		4	M4-1	W-P	M	CS2b	Noise	2	39.8059	27.0044		26.9059
1	4.1	Temp	F	CS14b	Noise	40.1809		2	7.2	S_T	M	CS7b	Tone	24.3757		4	M1-2	C-P	M	CS2b	Noise	36.8984		4	F1-3	W-S	F	CS2b	Noise	2	46.0767	26.5872		26.9129
1	4.1	Temp	F	CS15b	Noise	23.9451		3	M2	`CS Only`	M	CS1a	Noise	35.8509		4	M2-4	C-P	M	CS3b	Noise	28.6347		4	M4-4	W-S	M	CS1b	Noise	2	24.7748	25.9881		26.9725
1	4.1	Temp	F	CS1b	Noise	31.1159		3	F1	`Paired`	F	CS1a	Noise	91.7194		4	M2-4	C-P	M	CS1b	Noise	44.5698		4	F1-4	W-P	F	CS1b	Noise	3	24.4395	26.2366		27.0044
1	5.4	Temp	F	CS2b	Noise	46.2773		3	F11	`Paired`	F	CS1a	Noise	28.9136		4	M3-2	C-P	M	CS1b	Noise	46.5328		4	F2-1	W-P	F	CS1b	Noise	3	56.0762	24.2333		27.1302
1	4.1	Temp	F	CS3b	Noise	38.6482		3	F6	`Paired`	F	CS1a	Noise	35.545		4	F1-1	C-S	F	CS3b	Noise	36.4631												27.187
1	5.4	Temp	F	CS3b	Noise	31.899		3	M1	`Paired`	M	CS2a	Noise	38.8334		4	M1-1	C-S	M	CS3b	Noise	44.4775												27.2455
1	6.4	Temp	F	CS4b	Noise	44.2665		3	M1	`Paired`	M	CS1a	Noise	48.0878		4	F1-4	W-P	F	CS3b	Noise	29.2577												27.3683
1	5.4	Temp	F	CS4b	Noise	42.8672		3	M11	`Paired`	M	CS1a	Noise	58.5728		4	F1-4	W-P	F	CS1b	Noise	35.2324												27.3696
1	5.1	Temp	F	CS5b	Noise	29.0643		3	M16	`Paired`	M	CS2a	Noise	30.4512		4	F2-1	W-P	F	CS1b	Noise	36.2953												27.4551
1	4.1	Temp	F	CS6b	Noise	28.1992		3	F3	`Shock Only`	F	CS2a	Noise	37.1322		4	F4-1	W-P	F	CS3b	Noise	28.5969												27.5247
1	4.1	Temp	F	CS7b	Noise	38.1941		3	F8	`Shock Only`	F	CS2a	Noise	36.6502		4	M1-4	W-P	M	CS3b	Noise	23.2385												27.599
1	5.4	Temp	F	CS7b	Noise	40.0153		3	F9	`Shock Only`	F	CS1a	Noise	38.3656		4	M2-1	W-P	M	CS1b	Noise	26.9129												27.6964
1	5.1	Temp	F	CS8b	Noise	27.4551		3	M14	`Shock Only`	M	CS1a	Noise	25.1216		4	M2-1	W-P	M	CS3b	Noise	34.1454												27.7051
1	4.1	Temp	F	CS9b	Noise	33.5056		3	F5	`Unpaired`	F	CS2a	Noise	27.1302		4	M2-1	W-P	M	CS2b	Noise	35.6272												27.7075
1	3.4	Temp	M	CS15b	Noise	24.1704		3	M5	`Unpaired`	M	CS2a	Noise	29.6785		4	M4-1	W-P	M	CS2b	Noise	27.0044												27.7122
1	2.4	Temp	M	CS16b	Noise	26.2584		3	M5	`Unpaired`	M	CS1a	Noise	39.3396		4	F1-3	W-S	F	CS2b	Noise	26.5872												27.8331
1	1.2	Temp	M	CS1b	Noise	32.3027		4	F2-4	C-P	F	CS1b	Noise	25.575																				27.8796
1	3.4	Temp	M	CS2b	Noise	41.2677		4	F4-3	C-P	F	CS1b	Noise	29.4952																				27.8982
1	3.4	Temp	M	CS3b	Noise	83.543		4	F4-3	C-P	F	CS3b	Noise	48.1525																				28.0929
1	1.2	Temp	M	CS4b	Noise	63.74		4	M1-2	C-P	M	CS2b	Noise	47.5028																				28.1357
1	3.4	Temp	M	CS9b	Noise	35.4234		4	M1-2	C-P	M	CS1b	Noise	51.3194																				28.1374
1	1.2	Temp	M	CS9b	Noise	42.2427		4	M2-4	C-P	M	CS1b	Noise	40.4652																				28.1992
1	6.3	Rep	F	CS5a	Tone	24.0223		4	M3-2	C-P	M	CS2b	Noise	24.4323																				28.2081
1	6.3	Rep	F	CS6a	Tone	32.6065		4	F1-1	C-S	F	CS1b	Noise	24.9292																				28.5969
1	6.3	Rep	F	CS7a	Tone	28.8044		4	F2-2	C-S	F	CS3b	Noise	23.7386																				28.627
1	6.2	StimCh	F	CS1a	Tone	23.2205		4	F3-3	C-S	F	CS2b	Noise	40.0333																				28.6347
1	2.3	StimCh	M	CS12a	Tone	49.3402		4	M2-2	C-S	M	CS1b	Noise	29.0473																				28.6395
1	2.3	StimCh	M	CS14a	Tone	33.6856		4	F1-4	W-P	F	CS1b	Noise	26.2366																				28.6789
1	2.3	StimCh	M	CS1a	Tone	24.262		4	F2-1	W-P	F	CS1b	Noise	24.2333																				28.7447
1	2.3	StimCh	M	CS2a	Tone	37.4981		4	F2-1	W-P	F	CS3b	Noise	26.8357																				28.7977
1	2.3	StimCh	M	CS3a	Tone	38.4221		4	F3-1	W-P	F	CS3b	Noise	29.1216																				28.8574
1	2.3	StimCh	M	CS7a	Tone	29.6367		4	F4-1	W-P	F	CS1b	Noise	46																				28.9136
1	2.3	StimCh	M	CS8a	Tone	53.1608		4	M1-4	W-P	M	CS3b	Noise	31.1384																				28.926
2	4.3	NS_TWN	F	CS14b	Noise	31.2115		4	M1-4	W-P	M	CS1b	Noise	40.0253																				29.0473
2	4.3	NS_TWN	F	CS15b	Noise	33.4141		4	M4-1	W-P	M	CS3b	Noise	25.0529																				29.0508
2	2.3	NS_TWN	F	CS1b	Noise	24.8992		4	M4-1	W-P	M	CS2b	Noise	39.8059																				29.0643
2	3.3	NS_TWN	F	CS2b	Noise	69.6166		4	M4-4	W-S	M	CS2b	Noise	24.6989																				29.1216
2	4.3	NS_TWN	F	CS5b	Noise	34.3437		4	M4-4	W-S	M	CS1b	Noise	25.9881																				29.1267
2	2.3	NS_TWN	F	CS7b	Noise	24.1808																												29.1781
2	8.3	NS_TWN	M	CS13b	Noise	32.2659																												29.2577
2	5.3	NS_TWN	M	CS1b	Noise	24.8893																												29.2721
2	5.3	NS_TWN	M	CS6b	Noise	24.3016																												29.3807
2	2.1	S_TWN	F	CS10b	Noise	35.9613																												29.4334
2	3.1	S_TWN	F	CS10b	Noise	28.6395																												29.45
2	2.1	S_TWN	F	CS12b	Noise	49.4453																												29.4952
2	2.1	S_TWN	F	CS14b	Noise	42.6635																												29.6522
2	3.1	S_TWN	F	CS1b	Noise	37.8941																												29.6785
2	4.1	S_TWN	F	CS1b	Noise	27.187																												29.7028
2	2.1	S_TWN	F	CS2b	Noise	42.2957																												29.7922
2	3.1	S_TWN	F	CS2b	Noise	28.6789																												30.0875
2	2.1	S_TWN	F	CS3b	Noise	40.8645																												30.1082
2	3.1	S_TWN	F	CS3b	Noise	30.2388																												30.2227
2	4.1	S_TWN	F	CS4b	Noise	27.7075																												30.2388
2	2.1	S_TWN	F	CS5b	Noise	49.8953																												30.3457
2	3.1	S_TWN	F	CS5b	Noise	53.2187																												30.3979
2	2.1	S_TWN	F	CS6b	Noise	29.1781																												30.4415
2	3.1	S_TWN	F	CS6b	Noise	40.6498																												30.4512
2	2.1	S_TWN	F	CS8b	Noise	27.3696																												30.6375
2	2.1	S_TWN	F	CS9b	Noise	46.3476																												30.8038
2	8.1	S_TWN	M	CS11b	Noise	41.7863																												30.8783
2	5.1	S_TWN	M	CS15b	Noise	28.7977																												30.909
2	8.1	S_TWN	M	CS15b	Noise	51.3446																												30.9379
2	5.1	S_TWN	M	CS16b	Noise	28.1374																												30.9462
2	8.1	S_TWN	M	CS16b	Noise	42.3333																												31.0345
2	8.1	S_TWN	M	CS1b	Noise	23.8341																												31.0712
2	5.1	S_TWN	M	CS2b	Noise	66.4044																												31.1159
2	8.1	S_TWN	M	CS2b	Noise	33.8469																												31.1322
2	5.1	S_TWN	M	CS3b	Noise	68.8329																												31.1384
2	8.1	S_TWN	M	CS3b	Noise	101.72																												31.1611
2	8.1	S_TWN	M	CS4b	Noise	72.1292																												31.2115
2	8.1	S_TWN	M	CS5b	Noise	43.2011																												31.2184
2	8.1	S_TWN	M	CS5b	Noise	72.184																												31.4609
2	8.1	S_TWN	M	CS6b	Noise	59.9006																												31.4764
2	5.1	S_TWN	M	CS7b	Noise	23.289																												31.6759
2	5.1	S_TWN	M	CS8b	Noise	30.2227																												31.7177
2	8.1	S_TWN	M	CS8b	Noise	45.4027																												31.7766
2	8.1	S_TWN	M	CS9b	Noise	32.8997																												31.8686
2	4.4	WNS_TWN	F	CS12b	Noise	31.1611																												31.899
2	4.4	WNS_TWN	F	CS3b	Noise	53.2185																												32.0136
2	3.4	WNS_TWN	F	CS9b	Noise	59.6553																												32.1084
2	8.4	WNS_TWN	M	CS12b	Noise	35.1151																												32.2035
2	8.4	WNS_TWN	M	CS15b	Noise	40.4033																												32.2069
2	7.4	WNS_TWN	M	CS1b	Noise	25.2771																												32.2338
2	6.4	WNS_TWN	M	CS2b	Noise	29.7028																												32.2659
2	5.4	WNS_TWN	M	CS5b	Noise	29.1267																												32.3027
2	2.2	S_T	F	CS14b	Tone	26.904																												32.4063
2	2.2	S_T	F	CS2b	Tone	53.7378																												32.7307
2	2.2	S_T	F	CS3b	Tone	28.0875																												32.7407
2	2.2	S_T	F	CS5b	Tone	54.8908																												32.8353
2	2.2	S_T	F	CS6b	Tone	40.2542																												32.8489
2	7.2	S_T	M	CS13b	Tone	23.6744																												32.8997
2	6.2	S_T	M	CS5b	Tone	49.4287																												32.9331
3	F12	`CS Only`	F	CS1a	Noise	25.2637																												32.9959
3	F11	`Paired`	F	CS1a	Noise	39.0081																												33.2076
3	F6	`Paired`	F	CS1a	Noise	106.015																												33.2355
3	F1	`Paired`	F	CS2a	Noise	43.3727																												33.2712
3	F11	`Paired`	F	CS2a	Noise	40.2681																												33.2966
3	F6	`Paired`	F	CS2a	Noise	39.8869																												33.3904
3	M1	`Paired`	M	CS1a	Noise	39.6798																												33.3965
3	M11	`Paired`	M	CS1a	Noise	36.9878																												33.4141
3	M16	`Paired`	M	CS1a	Noise	40.3476																												33.4521
3	M6	`Paired`	M	CS1a	Noise	48.9317																												33.5056
3	M1	`Paired`	M	CS2a	Noise	52.4794																												33.6115
3	M11	`Paired`	M	CS2a	Noise	32.9331																												33.7983
3	M6	`Paired`	M	CS2a	Noise	44.9036																												33.8469
3	F3	`Shock Only`	F	CS1a	Noise	70.6081																												34.1454
3	F14	`Shock Only`	F	CS2a	Noise	63.3227																												34.2762
3	F3	`Shock Only`	F	CS2a	Noise	28.2081																												34.3437
3	F3	`Shock Only`	F	CS2a	Noise	32.8489																												34.4537
3	F9	`Shock Only`	F	CS2a	Noise	25.2365																												34.5864
3	M14	`Shock Only`	M	CS1a	Noise	36.2399																												34.7009
3	M8	`Shock Only`	M	CS1a	Noise	32.0136																												34.7261
3	M8	`Shock Only`	M	CS1a	Noise	27.2455																												35.1151
3	M9	`Shock Only`	M	CS1a	Noise	69.4269																												35.1372
3	M14	`Shock Only`	M	CS2a	Noise	69.4906																												35.2324
3	M3	`Shock Only`	M	CS2a	Noise	67.7832																												35.4234
3	M8	`Shock Only`	M	CS2a	Noise	24.2412																												35.545
3	M9	`Shock Only`	M	CS2a	Noise	67.0912																												35.602
3	F10	`Unpaired`	F	CS1a	Noise	49.8585																												35.605
3	F4	`Unpaired`	F	CS1a	Noise	25.0645																												35.6272
3	F5	`Unpaired`	F	CS1a	Noise	40.8889																												35.7668
3	F10	`Unpaired`	F	CS2a	Noise	33.4521																												35.8111
3	F5	`Unpaired`	F	CS2a	Noise	40.0016																												35.8509
3	F5	`Unpaired`	F	CS2a	Noise	61.9813																												35.9613
3	M10	`Unpaired`	M	CS1a	Noise	41.9842																												36.0342
3	M15	`Unpaired`	M	CS1a	Noise	43.2122																												36.0568
3	M4	`Unpaired`	M	CS1a	Noise	30.4415																												36.1025
3	M5	`Unpaired`	M	CS1a	Noise	39.4909																												36.1575
3	M10	`Unpaired`	M	CS2a	Noise	39.2635																												36.1701
3	M15	`Unpaired`	M	CS2a	Noise	39.4853																												36.2399
3	M4	`Unpaired`	M	CS2a	Noise	41.6429																												36.2953
3	M5	`Unpaired`	M	CS2a	Noise	53.0712																												36.3118
4	F3-2	C-P	F	CS1b	Noise	29.7922																												36.3834
4	F4-3	C-P	F	CS1b	Noise	40.8695																												36.4174
4	F2-4	C-P	F	CS2b	Noise	46.2737																												36.4631
4	F2-4	C-P	F	CS3b	Noise	36.0568																												36.5134
4	M3-2	C-P	M	CS2b	Noise	45.0651																												36.6502
4	M3-2	C-P	M	CS3b	Noise	52.6296																												36.8098
4	F1-1	C-S	F	CS1b	Noise	40.6621																												36.8984
4	F2-2	C-S	F	CS1b	Noise	51.3337																												36.9281
4	F3-3	C-S	F	CS1b	Noise	37.5416																												36.9878
4	F1-1	C-S	F	CS2b	Noise	31.7766																												37.1322
4	F2-2	C-S	F	CS2b	Noise	44.4756																												37.1944
4	F3-3	C-S	F	CS2b	Noise	28.8574																												37.2477
4	F1-1	C-S	F	CS3b	Noise	41.0468																												37.3511
4	F4-2	C-S	F	CS3b	Noise	36.4174																												37.5416
4	M1-1	C-S	M	CS1b	Noise	45.2936																												37.599
4	M3-3	C-S	M	CS1b	Noise	58.2646																												37.8941
4	M4-2	C-S	M	CS1b	Noise	41.7615																												38.1244
4	M1-1	C-S	M	CS2b	Noise	36.1025																												38.1941
4	M3-3	C-S	M	CS2b	Noise	33.2966																												38.2831
4	M4-2	C-S	M	CS2b	Noise	34.4537																												38.3656
4	M1-1	C-S	M	CS3b	Noise	39.9898																												38.6073
4	M3-3	C-S	M	CS3b	Noise	46.753																												38.6482
4	M4-2	C-S	M	CS3b	Noise	35.602																												38.8334
4	F1-4	W-P	F	CS1b	Noise	24.4395																												39.0081
4	F2-1	W-P	F	CS1b	Noise	56.0762																												39.1699
4	F2-1	W-P	F	CS2b	Noise	49.9476																												39.2635
4	F1-4	W-P	F	CS3b	Noise	54.0158																												39.3396
4	M2-1	W-P	M	CS1b	Noise	50.8439																												39.4853
4	M4-1	W-P	M	CS1b	Noise	30.8783																												39.4909
4	M2-1	W-P	M	CS2b	Noise	25.4559																												39.6455
4	F1-3	W-S	F	CS1b	Noise	36.8098																												39.6798
4	F1-3	W-S	F	CS2b	Noise	46.0767																												39.8059
4	M4-4	W-S	M	CS1b	Noise	24.7748																												39.8869
4	M1-3	W-S	M	CS2b	Noise	43.9509																												39.9898
4	M4-4	W-S	M	CS3b	Noise	36.9281																												40.0016
																																		40.0153
																																		40.0253
																																		40.0333
																																		40.1809
																																		40.2681
																																		40.3476
																																		40.3765
																																		40.4033
																																		40.4652
																																		40.6498
																																		40.6621
																																		40.8645
																																		40.8695
																																		40.8889
																																		41.0302
																																		41.0468
																																		41.0648
																																		41.2507
																																		41.2677
																																		41.4831
																																		41.5484
																																		41.6429
																																		41.6735
																																		41.7615
																																		41.7863
																																		41.9842
																																		42.1977
																																		42.2427
																																		42.2957
																																		42.3333
																																		42.6278
																																		42.6635
																																		42.8672
																																		43.1444
																																		43.2011
																																		43.2122
																																		43.3727
																																		43.9509
																																		44.2665
																																		44.4756
																																		44.4775
																																		44.5698
																																		44.5778
																																		44.9036
																																		44.996
																																		45.0651
																																		45.1523
																																		45.1706
																																		45.2936
																																		45.3173
																																		45.4027
																																		46
																																		46.0767
																																		46.1858
																																		46.2737
																																		46.2773
																																		46.3476
																																		46.5328
																																		46.5383
																																		46.753
																																		46.94
																																		47.5028
																																		48.0878
																																		48.1525
																																		48.8044
																																		48.9317
																																		49.2079
																																		49.4453
																																		49.8585
																																		49.8953
																																		49.9224
																																		49.9476
																																		50.5098
																																		50.8439
																																		51.3194
																																		51.3337
																																		51.3446
																																		51.5194
																																		51.5618
																																		51.8037
																																		52.245
																																		52.2745
																																		52.4794
																																		52.5678
																																		52.6296
																																		53.0712
																																		53.2185
																																		53.2187
																																		53.2875
																																		53.3554
																																		54.0158
																																		55.579
																																		55.6366
																																		56.0562
																																		56.0762
																																		56.3208
																																		56.6192
																																		58.2646
																																		58.5728
																																		59.04
																																		59.1659
																																		59.5174
																																		59.6553
																																		59.9006
																																		60.9002
																																		61.9813
																																		63.3227
																																		63.74
																																		66.4044
																																		67.0912
																																		67.7832
																																		68.8329
																																		69.4269
																																		69.4401
																																		69.4906
																																		69.6166
																																		70.6081
																																		72.1292
																																		72.184
																																		77.2963
																																		78.4255
																																		82.5594
																																		83.543
																																		91.7194
																																		101.72
																																		106.015
																																		124.472
																																		131.071

## Sheet: Combined Shocks
Analysis of Response to Shock
Extracted from VideoFreeze videos and VideoFreeze scoring.
Data are included for all animals which receieved shock (n = 102) across all experiments and groups
As seen in Figure 9
			Day 1										Day 2							Full list		Full list
Animal	Group	Sex	Shock1	Shock2	Shock3	Shock4	Shock5	Average ALL		Animal	Group	Sex	Shock1	Shock2	Shock3	Shock4	Shock5	Average ALL		Day1		Day 2
1.3	Rep	M	75.7574	51.901	35.408	44.3418	35.8508	48.6518		1.3	Rep	M	93.9836	32.1901	33.2648	13.6568	37.8658	42.1922		75.7574		93.9836
2.1	Rep	M	61.8764	43.813	50.2497	46.6903	64.8957	53.505		2.1	Rep	M	31.718	35.0947	38.0123	32.9442	39.4476	35.4434		61.8764		31.718
2.2	Rep	M	72.4188	54.1059	52.6757	53.6614	34.4837	53.4691		2.2	Rep	M	51.3785	45.4977	51.3458	37.3833	54.4214	48.0053		72.4188		51.3785
3.1	Rep	M	67.2458	38.7741	60.6151	133.851	53.8974	70.8767		3.1	Rep	M	46.0324	38.8701	37.4381	33.0889	24.1466	35.9152		67.2458		46.0324
4.2	Rep	F	62.3207	54.005	43.5647	42.1162	37.4978	47.9009		4.2	Rep	F	30.9699	38.8948	37.1343	36.847	61.2942	41.028		62.3207		30.9699
4.3	Rep	F	37.3261	25.6411	54.103	32.9211	45.8596	39.1702		4.3	Rep	F	33.1923	5.88603	21.2838	50.408	38.0906	29.7721		37.3261		33.1923
6.3	Rep	F	86.8715	49.2879	37.1856	48.0547	32.9756	50.8751		6.3	Rep	F	40.0004	26.6014	53.5365	80.3557	44.8405	49.0669		86.8715		40.0004
3.3	StimCh	M	100.304	51.9231	42.1633	55.5988	152.766	80.551		3.3	StimCh	M	41.355	36.1274	81.0423	69.6157	57.2726	57.0826		100.304		41.355
3.2	StimCh	M	60.01	67.0987	119.397	39.951	31.3389	63.5591		3.2	StimCh	M	42.5858	42.7574	48.1243	54.5594	51.9016	47.9857		60.01		42.5858
1.1	StimCh	M	89.5393	82.6713	37.2743	63.971	60.0766	66.7065		1.1	StimCh	M	39.6614	48.6592	40.0652	34.4065	34.7077	39.5		89.5393		39.6614
2.3	StimCh	M	61.1266	96.4194	74.0828	65.4234	56.0736	70.6252		2.3	StimCh	M	59.1887	43.7918	41.3806	110.783	63.2704	63.6829		61.1266		59.1887
4.4	StimCh	F	69.9719	61.3341	30.9809	36.0169	26.3222	44.9252		4.4	StimCh	F	13.0853	30.0933	28.5199	28.8622	33.9574	26.9036		69.9719		13.0853
6.1	StimCh	F	83.8479	32.9214	95.8641	39.8675	37.5448	58.0091		6.1	StimCh	F	51.3326	37.7062	44.9207	30.617	38.0871	40.5327		83.8479		51.3326
6.2	StimCh	F	96.6233	46.2152	43.404	48.4406	68.0172	60.5401		6.2	StimCh	F	17.6002	43.9425	41.4192	26.8172	35.1245	32.9807		96.6233		17.6002
1.4	Temp	M	55.635	72.072	57.89	37.909	38.0584	52.3129		1.4	Temp	M	27.3194	206.668	58.3994	26.2904	144.584	92.6522		55.635		27.3194
3.4	Temp	M	41.2909	42.1727	36.976	100.005	57.459	55.5807		3.4	Temp	M	26.1236	24.9903	7.68452	16.1457	5.65201	16.1192		41.2909		26.1236
2.4	Temp	M	42.2387	49.4357	46.6721	46.3474	117.305	60.3998		2.4	Temp	M	42.6508	31.1443	67.1662	75.1197	21.3852	47.4932		42.2387		42.6508
1.2	Temp	M	89.9831	46.1727	49.5628	37.8053	52.9755	55.2999		1.2	Temp	M	29.6768	31.926	44.2349	50.5821	50.0157	41.2871		89.9831		29.6768
6.4	Temp	F	36.8396	39.1404	73.5094	79.8998	41.1361	54.1051		6.4	Temp	F	0.39075	45.369	54.9718	15.1808	54.4996	34.0824		36.8396		0.39075
4.1	Temp	F	35.5876	50.3314	48.9913	42.7926	42.4336	44.0273		4.1	Temp	F	48.7671	65.5495	32.1233	36.653	56.0662	47.8318		35.5876		48.7671
5.4	Temp	F	51.9884	36.0776	81.6403	54.3995	63.8431	57.5898		5.4	Temp	F	34.0658	56.6729	44.1485	49.4218	35.243	43.9104		51.9884		34.0658
5.1	Temp	F	37.6251	30.8259	45.9325	28.8685	72.8367	43.2177		5.1	Temp	F	15.9215	40.332	28.8574	20.9596	46.2829	30.4707		37.6251		15.9215
1.4	`Noise Shock Noise Test`	F	69.9425	27.6356	43.2452	27.8496	53.7683	44.4882		1.4	`Noise Shock Noise Test`	F	19.9277	26.1023	7.40353	30.0734	27.9162	22.2846		51.901		32.1901
2.4	`Noise Shock Noise Test`	F	82.3734	69.348	31.7615	39.2261	74.0704	59.3559		2.4	`Noise Shock Noise Test`	F	34.5992	63.7345	43.5205	43.5177	46.937	46.4618		43.813		35.0947
3.4	`Noise Shock Noise Test`	F	75.1414	86.1451	93.7479	103.772	51.2704	82.0154		3.4	`Noise Shock Noise Test`	F	74.2649	64.3187	96.7214	63.9419	75.4278	74.9349		54.1059		45.4977
4.4	`Noise Shock Noise Test`	F	66.2948	65.0661	66.3049	52.126	34.5085	56.8601		4.4	`Noise Shock Noise Test`	F	43.0851	46.3305	73.56	74.7024	80.7434	63.6843		38.7741		38.8701
5.4	`Noise Shock Noise Test`	M	50.4402	50.8487	62.6799	91.02	52.2587	61.4495		5.4	`Noise Shock Noise Test`	M	47.9121	46.4493	53.7834	55.4243	48.3687	50.3876		54.005		38.8948
6.4	`Noise Shock Noise Test`	M	61.7925	56.3215	65.4103	36.8423	82.0456	60.4824		6.4	`Noise Shock Noise Test`	M	42.4825	52.2895	39.5805	12.7474	82.4609	45.9122		25.6411		5.88603
7.4	`Noise Shock Noise Test`	M	41.4742	56.9852	64.907	59.3744	51.9143	54.931		7.4	`Noise Shock Noise Test`	M	36.7074	77.5555	42.6708	57.4088	50.6776	53.004		49.2879		26.6014
8.4	`Noise Shock Noise Test`	M	47.4999	51.1522	41.4302	48.7405	49.6417	47.6929		8.4	`Noise Shock Noise Test`	M	41.4592	19.3052	25.2379	7.81424	37.2699	26.2173		51.9231		36.1274
1.1	`Shock Only Noise Test`	F	63.4953	55.0341	39.663	51.0185	82.1637	58.2749		1.1	`Shock Only Noise Test`	F	40.1272	33.1618	20.3644	13.7913	35.4055	28.57		67.0987		42.7574
2.1	`Shock Only Noise Test`	F	107.613	59.01	90.7451	88.3525	31.8917	75.5225		2.1	`Shock Only Noise Test`	F	29.7036	114.294	56.7381	93.145	32.4954	65.2752		82.6713		48.6592
3.1	`Shock Only Noise Test`	F	50.2074	57.4625	44.1289	62.6813	92.5446	61.4049		3.1	`Shock Only Noise Test`	F	20.8729	35.8249	47.5766	63.2876	55.4964	44.6117		96.4194		43.7918
4.1	`Shock Only Noise Test`	F	86.4557	63.4054	44.6362	64.2395	39.7265	59.6927		4.1	`Shock Only Noise Test`	F	43.9265	36.3194	47.3162	35.6682	52.8074	43.2075		61.3341		30.0933
5.1	`Shock Only Noise Test`	M	143.496	82.2034	69.9655	47.5534	71.1197	82.8676		5.1	`Shock Only Noise Test`	M	82.7624	28.7434	48.6027	103.722	68.9289	66.5519		32.9214		37.7062
6.1	`Shock Only Noise Test`	M	50.3208	52.7451	57.5625	62.0417	41.7147	52.877		6.1	`Shock Only Noise Test`	M	53.7331	62.3688	72.1559	34.4899	41.2964	52.8088		46.2152		43.9425
7.1	`Shock Only Noise Test`	M	72.2251	29.342	71.36	41.7012	53.3071	53.5871		7.1	`Shock Only Noise Test`	M	80.4764	46.7626	40.0597	123.338	68.7368	71.8747		72.072		206.668
8.1	`Shock Only Noise Test`	M	69.0549	89.1023	64.617	67.6135	80.1795	74.1134		8.1	`Shock Only Noise Test`	M	60.4853	65.5827	113.28	156.141	68.229	92.7436		42.1727		24.9903
1.2	`Shock Only Tone Test`	F	53.8836	82.862	30.9088	103.218	60.6237	66.2992		1.2	`Shock Only Tone Test`	F	46.6697	75.4171	87.2996	33.3422	35.3343	55.6126		49.4357		31.1443
2.2	`Shock Only Tone Test`	F	125.008	113.463	95.6052	65.0387	95.4528	98.9135		2.2	`Shock Only Tone Test`	F	77.4056	69.6764	32.5193	37.9667	128.729	69.2594		46.1727		31.926
3.2	`Shock Only Tone Test`	F	54.6503	63.0294	71.7309	59.9149	42.931	58.4513		3.2	`Shock Only Tone Test`	F	47.6392	66.8455	59.218	60.0247	44.9884	55.7432		39.1404		45.369
4.2	`Shock Only Tone Test`	F	26.9729	39.7971	47.6405	55.7639	26.0045	39.2358		4.2	`Shock Only Tone Test`	F	25.1213	44.5667	36.2455	46.0655	1.34724	30.6692		50.3314		65.5495
5.2	`Shock Only Tone Test`	M	86.8312	87.6442	73.4667	76.0663	38.749	72.5515		5.2	`Shock Only Tone Test`	M	53.0331	46.9101	39.6694	44.0336	68.011	50.3314		36.0776		56.6729
6.2	`Shock Only Tone Test`	M	69.5053	65.6254	155.67	75.0112	86.6092	90.4842		6.2	`Shock Only Tone Test`	M	38.4909	62.8256	35.7545	34.275	105.765	55.4222		30.8259		40.332
7.2	`Shock Only Tone Test`	M	70.6161	49.0397	58.8803	64.5079	69.5633	62.5215		7.2	`Shock Only Tone Test`	M	50.326	76.9689	74.8302	58.1831	70.526	66.1668		35.408		33.2648
8.2	`Shock Only Tone Test`	M	41.7425	54.2073	55.2078	37.4184	77.2201	53.1592		8.2	`Shock Only Tone Test`	M	49.6498	87.4267	158.337	56.4244	94.4824	89.2641		50.2497		38.0123
F1	P	F	59.9903	37.62	42.2557	26.0325	37.8876	40.7572		F1	P	F	28.0521	32.4825	35.4736	45.9672	54.9806	39.3912		52.6757		51.3458
F6	P	F	42.6008	56.1012	21.4904	52.2924	74.9528	49.4875		F6	P	F	40.4627	38.2038	49.9116	34.775	17.1288	36.0964		60.6151		37.4381
F11	P	F	61.0398	46.464	62.5901	39.9351	54.1936	52.8445		F11	P	F	56.4596	45.2405	70.9672	59.6432	39.4881	54.3597		43.5647		37.1343
F16	P	F	57.6126	43.3187	52.8613	77.6273	72.2988	60.7437		F16	P	F	34.0969	42.1849	62.5523	30.2273	38.4076	41.4938		54.103		21.2838
M1	P	M	72.4225	59.6329	60.8875	181.279	62.6091	87.3662		M1	P	M	77.568	74.6115	42.6622	75.054	45.5081	63.0808		37.1856		53.5365
M6	P	M	63.2921	44.7943	46.6607	67.3931	47.7733	53.9827		M6	P	M	37.1902	56.2038	41.9332	35.3523	35.3478	41.2055		42.1633		81.0423
M11	P	M	73.8252	53.3663	110.507	85.3082	41.1943	72.8402		M11	P	M	89.9495	38.0672	43.131	47.3867	48.1876	53.3444		119.397		48.1243
M16	P	M	70.8639	39.5918	60.9458	63.5487	61.2785	59.2457		M16	P	M	33.1552	18.3552	32.1496	40.4769	36.0925	32.0459		37.2743		40.0652
F9	S	F	98.4852	42.9513	40.8242	56.711	96.1243	67.0192		F9	S	F	54.5946	59.7274	27.6454	36.3934	24.2258	40.5173		74.0828		41.3806
F14	S	F	67.1815	26.4569	29.2807	96.4403	58.3797	55.5478		F14	S	F	65.1592	57.9888	41.7793	39.5736	85.6639	58.033		30.9809		28.5199
F3	S	F	53.5169	53.8362	71.4142	69.0499	104.152	70.3938		F3	S	F	60.4532	69.8779	95.2891	26.4891	66.2835	63.6786		95.8641		44.9207
F8	S	F	75.6163	56.2855	37.725	38.4512	41.4457	49.9047		F8	S	F	31.4502	35.2685	31.3025	56.9812	54.4233	41.8851		43.404		41.4192
M9	S	M	86.1414	108.214	47.5056	59.5291	65.5029	73.3786		M9	S	M	28.0583	75.9571	88.2563	66.284	84.924	68.6959		57.89		58.3994
M14	S	M	48.7536	45.513	63.6998	67.3124	83.8031	61.8164		M14	S	M	79.9977	66.9307	38.1599	44.5073	42.3268	54.3845		36.976		7.68452
M3	S	M	43.1158	53.1691	25.1203	80.3178	46.5996	49.6645		M3	S	M	68.1657	119.428	41.9536	58.1866	87.986	75.144		46.6721		67.1662
M8	S	M	72.3589	82.8771	98.4647	58.6398	39.5506	70.3782		M8	S	M	66.1862	45.7131	35.4571	56.2877	66.0761	53.944		49.5628		44.2349
F5	UP	F	76.2404	57.8894	47.0514	41.1982	41.0739	52.6907		F5	UP	F	44.1919	51.871	50.8626	30.4977	35.4279	42.5702		73.5094		54.9718
F10	UP	F	84.9041	71.8854	50.856	74.3832	98.4791	76.1016		F10	UP	F	82.6838	37.7547	38.2853	45.2307	30.5156	46.894		48.9913		32.1233
F15	UP	F	81.0402	71.6954	52.5126	50.7193	59.5854	63.1106		F15	UP	F	63.2442	17.9016	57.6381	32.3834	66.9183	47.6171		81.6403		44.1485
F4	UP	F	113.986	60.391	33.6935	68.1529	35.3511	62.3149		F4	UP	F	20.132	26.7971	46.5283	45.5054	61.3329	40.0591		45.9325		28.8574
M5	UP	M	83.3001	61.7057	37.2203	37.5863	41.2302	52.2085		M5	UP	M	43.3419	108.091	77.6778	41.8853	44.5108	63.1014		44.3418		13.6568
M10	UP	M	55.4008	116.586	58.1511	95.9114	42.5418	73.7182		M10	UP	M	37.2785	37.9637	74.2039	43.7635	45.3638	47.7147		46.6903		32.9442
M15	UP	M	75.6148	83.4699	87.0063	79.2374	34.6892	72.0035		M15	UP	M	47.6672	73.9743	35.1792	43.8827	48.3186	49.8044		53.6614		37.3833
M4	UP	M	60.2304	70.6162	63.4823	44.906	45.8508	57.0171		M4	UP	M	63.5563	46.9277	44.2717	38.102	68.1299	52.1975		133.851		33.0889
F1-2	C-P	F	54.5475	53.046	145.161	55.1962	64.1219	74.4145		F1-2	C-P	F	39.0767	66.0252	74.4116	78.3224	79.0308	67.3733		42.1162		36.847
F2-4	C-P	F	78.782	79.3788	66.6362	47.4472	102.799	75.0086		F2-4	C-P	F	66.6099	69.6604	76.2692	50.4367	79.7011	68.5355		32.9211		50.408
F3-2	C-P	F	56.2966	49.4678	62.8229	63.4614	66.5061	59.711		F3-2	C-P	F	36.2988	62.427	51.8297	55.4482	64.2603	54.0528		48.0547		80.3557
F4-3	C-P	F	70.7293	74.1241	63.7271	59.2425	80.4922	69.663		F4-3	C-P	F	83.1875	38.5772	39.5718	72.4293	68.2551	60.4042		55.5988		69.6157
M1-2	C-P	M	55.2932	86.5535	82.8386	89.9801	93.4244	81.618		M1-2	C-P	M	39.7143	58.8694	43.5817	20.1184	52.8683	43.0304		39.951		54.5594
M2-4	C-P	M	122.273	47.859	47.3572	53.2591	57.1937	65.5884		M2-4	C-P	M	36.234	39.8502	35.1949	36.4029	55.9759	40.7316		63.971		34.4065
M3-2	C-P	M	90.155	140.956	89.8937	60.6001	56.273	87.5756		M3-2	C-P	M	52.1057	55.2913	45.0956	59.2525	10.6843	44.4859		65.4234		110.783
M4-3	C-P	M	40.2473	48.5576	46.7092	69.5708	45.373	50.0916		M4-3	C-P	M	23.8445	68.3368	51.4678	41.0961	38.4007	44.6292		36.0169		28.8622
F1-1	C-S	F	85.6835	57.3497	42.6933	42.1621	44.2008	54.4179		F1-1	C-S	F	101.316	43.2904	47.484	45.6636	0.529886	47.6568		39.8675		30.617
F2-2	C-S	F	65.9247	120.491	83.1223	81.0868	62.9318	82.7113		F2-2	C-S	F	30.9085	50.4545	49.8177	40.9108	54.649	45.3481		48.4406		26.8172
F3-3	C-S	F	107.775	61.1859	64.959	55.1649	67.8308	71.3831		F3-3	C-S	F	64.9226	62.3862	62.9653	39.3905	47.98	55.5289		37.909		26.2904
F4-2	C-S	F	59.5424	60.5863	57.2353	50.5405	51.3034	55.8416		F4-2	C-S	F	39.6892	38.5871	24.4803	60.7954	58.1943	44.3493		100.005		16.1457
M1-1	C-S	M	82.4007	63.968	119.788	43.2955	43.3717	70.5648		M1-1	C-S	M	47.7893	58.0062	54.495	71.1195	68.5438	59.9908		46.3474		75.1197
M2-2	C-S	M	83.9133	50.7497	85.7023	57.8209	63.559	68.349		M2-2	C-S	M	60.2248	81.5953	65.6802	78.2356	61.1181	69.3708		37.8053		50.5821
M3-3	C-S	M	57.4732	49.2358	43.3493	75.5451	93.5196	63.8246		M3-3	C-S	M	62.2584	88.1503	137.857	48.3337	47.9089	76.9017		79.8998		15.1808
M4-2	C-S	M	72.7033	60.3008	50.5662	37.1331	50.5027	54.2412		M4-2	C-S	M	42.1805	39.6796	47.3375	45.4637	58.1224	46.5567		42.7926		36.653
F1-4	W-P	F	93.8545	88.9592	54.7051	54.5645	48.8089	68.1784		F1-4	W-P	F	71.9494	27.5663	36.0646	39.9692	58.0135	46.7126		54.3995		49.4218
F2-1	W-P	F	55.2813	55.0904	44.4088	64.8718	47.9086	53.5122		F2-1	W-P	F	52.7979	57.9767	70.501	56.3379	67.1793	60.9586		28.8685		20.9596
F3-1	W-P	F	81.4277	63.2109	48.8744	59.4633	96.0755	69.8104		F3-1	W-P	F	98.8064	49.0937	53.7052	38.3206	28.2801	53.6412		35.8508		37.8658
F4-1	W-P	F	84.3435	61.3853	58.0017	57.3085	64.3808	65.084		F4-1	W-P	F	42.7999	44.9066	26.6643	46.9118	43.449	40.9463		64.8957		39.4476
M1-4	W-P	M	66.333	70.524	84.8561	56.1382	53.3211	66.2345		M1-4	W-P	M	42.2969	33.874	42.5413	68.68	23.4334	42.1651		34.4837		54.4214
M2-1	W-P	M	94.5113	84.5309	54.778	52.554	39.6456	65.204		M2-1	W-P	M	33.2637	42.8975	59.0317	46.8758	71.4998	50.7137		53.8974		24.1466
M3-1	W-P	M	79.8128	65.4756	52.8784	78.9816	64.8538	68.4004		M3-1	W-P	M	43.2091	59.4441	59.3813	56.8828	64.9535	56.7742		37.4978		61.2942
M4-1	W-P	M	47.7484	79.3133	41.9918	32.5731	50.8647	50.4983		M4-1	W-P	M	54.8307	40.4022	45.2792	35.2611	65.8478	48.3242		45.8596		38.0906
F1-3	W-S	F	81.3402	58.9357	110.433	46.6198	38.5064	67.167		F1-3	W-S	F	57.1214	90.1221	66.259	44.2416	64.7101	64.4908		32.9756		44.8405
F2-3	W-S	F	38.1468	51.8156	21.7426	31.429	52.9289	39.2126		F2-3	W-S	F	17.2611	47.3713	28.8004	51.3131	29.0133	34.7518		152.766		57.2726
F3-4	W-S	F	77.7058	72.8402	76.7112	62.1149	48.9649	67.6674		F3-4	W-S	F	87.0864	47.1739	58.5866	70.4677	51.3966	62.9422		31.3389		51.9016
F4-4	W-S	F	67.9158	88.2447	56.8187	46.3034	64.0411	64.6647		F4-4	W-S	F	42.8835	48.0062	53.0784	58.88	50.3673	50.6431		60.0766		34.7077
M1-3	W-S	M	79.1536	104.263	63.5166	82.1252	116.537	89.1191		M1-3	W-S	M	66.3994	48.5349	81.0957	73.7553	43.4118	62.6394		56.0736		63.2704
M2-3	W-S	M	112.508	209.158	42.8852	66.031	64.2582	98.9681		M2-3	W-S	M	66.3088	69.774	49.0987	56.765	56.9963	59.7886		26.3222		33.9574
M3-4	W-S	M	41.0717	63.4554	61.4496	59.5777	79.5836	61.0276		M3-4	W-S	M	60.8873	44.593	51.5217	58.9203	34.0749	49.9994		37.5448		38.0871
M4-4	W-S	M	58.8913	72.9597	159.168	87.3331	78.9075	91.4519		M4-4	W-S	M	120.931	57.8471	52.6564	70.0556	62.6665	72.8313		68.0172		35.1245
																				38.0584		144.584
																				57.459		5.65201
																				117.305		21.3852
																				52.9755		50.0157
																				41.1361		54.4996
																				42.4336		56.0662
																				63.8431		35.243
																				72.8367		46.2829
																				69.9425		46.6697
																				82.3734		77.4056
																				75.1414		47.6392
																				66.2948		25.1213
																				50.4402		53.0331
																				61.7925		38.4909
																				41.4742		50.326
																				47.4999		49.6498
																				63.4953		40.1272
																				107.613		29.7036
																				50.2074		20.8729
																				86.4557		43.9265
																				143.496		82.7624
																				50.3208		53.7331
																				72.2251		80.4764
																				69.0549		60.4853
																				53.8836		19.9277
																				125.008		34.5992
																				54.6503		74.2649
																				26.9729		43.0851
																				86.8312		47.9121
																				69.5053		42.4825
																				70.6161		36.7074
																				41.7425		41.4592
																				27.6356		75.4171
																				69.348		69.6764
																				86.1451		66.8455
																				65.0661		44.5667
																				50.8487		46.9101
																				56.3215		62.8256
																				56.9852		76.9689
																				51.1522		87.4267
																				55.0341		33.1618
																				59.01		114.294
																				57.4625		35.8249
																				63.4054		36.3194
																				82.2034		28.7434
																				52.7451		62.3688
																				29.342		46.7626
																				89.1023		65.5827
																				82.862		26.1023
																				113.463		63.7345
																				63.0294		64.3187
																				39.7971		46.3305
																				87.6442		46.4493
																				65.6254		52.2895
																				49.0397		77.5555
																				54.2073		19.3052
																				43.2452		87.2996
																				31.7615		32.5193
																				93.7479		59.218
																				66.3049		36.2455
																				62.6799		39.6694
																				65.4103		35.7545
																				64.907		74.8302
																				41.4302		158.337
																				39.663		20.3644
																				90.7451		56.7381
																				44.1289		47.5766
																				44.6362		47.3162
																				69.9655		48.6027
																				57.5625		72.1559
																				71.36		40.0597
																				64.617		113.28
																				30.9088		7.40353
																				95.6052		43.5205
																				71.7309		96.7214
																				47.6405		73.56
																				73.4667		53.7834
																				155.67		39.5805
																				58.8803		42.6708
																				55.2078		25.2379
																				27.8496		33.3422
																				39.2261		37.9667
																				103.772		60.0247
																				52.126		46.0655
																				91.02		44.0336
																				36.8423		34.275
																				59.3744		58.1831
																				48.7405		56.4244
																				51.0185		13.7913
																				88.3525		93.145
																				62.6813		63.2876
																				64.2395		35.6682
																				47.5534		103.722
																				62.0417		34.4899
																				41.7012		123.338
																				67.6135		156.141
																				103.218		30.0734
																				65.0387		43.5177
																				59.9149		63.9419
																				55.7639		74.7024
																				76.0663		55.4243
																				75.0112		12.7474
																				64.5079		57.4088
																				37.4184		7.81424
																				53.7683		35.3343
																				74.0704		128.729
																				51.2704		44.9884
																				34.5085		1.34724
																				52.2587		68.011
																				82.0456		105.765
																				51.9143		70.526
																				49.6417		94.4824
																				82.1637		35.4055
																				31.8917		32.4954
																				92.5446		55.4964
																				39.7265		52.8074
																				71.1197		68.9289
																				41.7147		41.2964
																				53.3071		68.7368
																				80.1795		68.229
																				60.6237		27.9162
																				95.4528		46.937
																				42.931		75.4278
																				26.0045		80.7434
																				38.749		48.3687
																				86.6092		82.4609
																				69.5633		50.6776
																				77.2201		37.2699
																				59.9903		28.0521
																				42.6008		40.4627
																				61.0398		56.4596
																				57.6126		34.0969
																				72.4225		77.568
																				63.2921		37.1902
																				73.8252		89.9495
																				70.8639		33.1552
																				98.4852		54.5946
																				67.1815		65.1592
																				53.5169		60.4532
																				75.6163		31.4502
																				86.1414		28.0583
																				48.7536		79.9977
																				43.1158		68.1657
																				72.3589		66.1862
																				76.2404		44.1919
																				84.9041		82.6838
																				81.0402		63.2442
																				113.986		20.132
																				83.3001		43.3419
																				55.4008		37.2785
																				75.6148		47.6672
																				60.2304		63.5563
																				37.62		32.4825
																				56.1012		38.2038
																				46.464		45.2405
																				43.3187		42.1849
																				59.6329		74.6115
																				44.7943		56.2038
																				53.3663		38.0672
																				39.5918		18.3552
																				42.9513		59.7274
																				26.4569		57.9888
																				53.8362		69.8779
																				56.2855		35.2685
																				108.214		75.9571
																				45.513		66.9307
																				53.1691		119.428
																				82.8771		45.7131
																				57.8894		51.871
																				71.8854		37.7547
																				71.6954		17.9016
																				60.391		26.7971
																				61.7057		108.091
																				116.586		37.9637
																				83.4699		73.9743
																				70.6162		46.9277
																				42.2557		35.4736
																				21.4904		49.9116
																				62.5901		70.9672
																				52.8613		62.5523
																				60.8875		42.6622
																				46.6607		41.9332
																				110.507		43.131
																				60.9458		32.1496
																				40.8242		27.6454
																				29.2807		41.7793
																				71.4142		95.2891
																				37.725		31.3025
																				47.5056		88.2563
																				63.6998		38.1599
																				25.1203		41.9536
																				98.4647		35.4571
																				47.0514		50.8626
																				50.856		38.2853
																				52.5126		57.6381
																				33.6935		46.5283
																				37.2203		77.6778
																				58.1511		74.2039
																				87.0063		35.1792
																				63.4823		44.2717
																				26.0325		45.9672
																				52.2924		34.775
																				39.9351		59.6432
																				77.6273		30.2273
																				181.279		75.054
																				67.3931		35.3523
																				85.3082		47.3867
																				63.5487		40.4769
																				56.711		36.3934
																				96.4403		39.5736
																				69.0499		26.4891
																				38.4512		56.9812
																				59.5291		66.284
																				67.3124		44.5073
																				80.3178		58.1866
																				58.6398		56.2877
																				41.1982		30.4977
																				74.3832		45.2307
																				50.7193		32.3834
																				68.1529		45.5054
																				37.5863		41.8853
																				95.9114		43.7635
																				79.2374		43.8827
																				44.906		38.102
																				37.8876		54.9806
																				74.9528		17.1288
																				54.1936		39.4881
																				72.2988		38.4076
																				62.6091		45.5081
																				47.7733		35.3478
																				41.1943		48.1876
																				61.2785		36.0925
																				96.1243		24.2258
																				58.3797		85.6639
																				104.152		66.2835
																				41.4457		54.4233
																				65.5029		84.924
																				83.8031		42.3268
																				46.5996		87.986
																				39.5506		66.0761
																				41.0739		35.4279
																				98.4791		30.5156
																				59.5854		66.9183
																				35.3511		61.3329
																				41.2302		44.5108
																				42.5418		45.3638
																				34.6892		48.3186
																				45.8508		68.1299
																				55.2932		39.7143
																				122.273		36.234
																				90.155		52.1057
																				40.2473		23.8445
																				81.3402		57.1214
																				38.1468		17.2611
																				77.7058		87.0864
																				67.9158		42.8835
																				85.6835		101.316
																				65.9247		30.9085
																				107.775		64.9226
																				59.5424		39.6892
																				66.333		42.2969
																				94.5113		33.2637
																				79.8128		43.2091
																				47.7484		54.8307
																				93.8545		71.9494
																				55.2813		52.7979
																				81.4277		98.8064
																				84.3435		42.7999
																				82.4007		47.7893
																				83.9133		60.2248
																				57.4732		62.2584
																				72.7033		42.1805
																				79.1536		66.3994
																				112.508		66.3088
																				41.0717		60.8873
																				58.8913		120.931
																				54.5475		39.0767
																				78.782		66.6099
																				56.2966		36.2988
																				70.7293		83.1875
																				86.5535		58.8694
																				47.859		39.8502
																				140.956		55.2913
																				48.5576		68.3368
																				58.9357		90.1221
																				51.8156		47.3713
																				72.8402		47.1739
																				88.2447		48.0062
																				57.3497		43.2904
																				120.491		50.4545
																				61.1859		62.3862
																				60.5863		38.5871
																				70.524		33.874
																				84.5309		42.8975
																				65.4756		59.4441
																				79.3133		40.4022
																				88.9592		27.5663
																				55.0904		57.9767
																				63.2109		49.0937
																				61.3853		44.9066
																				63.968		58.0062
																				50.7497		81.5953
																				49.2358		88.1503
																				60.3008		39.6796
																				104.263		48.5349
																				209.158		69.774
																				63.4554		44.593
																				72.9597		57.8471
																				53.046		66.0252
																				79.3788		69.6604
																				49.4678		62.427
																				74.1241		38.5772
																				82.8386		43.5817
																				47.3572		35.1949
																				89.8937		45.0956
																				46.7092		51.4678
																				110.433		66.259
																				21.7426		28.8004
																				76.7112		58.5866
																				56.8187		53.0784
																				42.6933		47.484
																				83.1223		49.8177
																				64.959		62.9653
																				57.2353		24.4803
																				84.8561		42.5413
																				54.778		59.0317
																				52.8784		59.3813
																				41.9918		45.2792
																				54.7051		36.0646
																				44.4088		70.501
																				48.8744		53.7052
																				58.0017		26.6643
																				119.788		54.495
																				85.7023		65.6802
																				43.3493		137.857
																				50.5662		47.3375
																				63.5166		81.0957
																				42.8852		49.0987
																				61.4496		51.5217
																				159.168		52.6564
																				145.161		74.4116
																				66.6362		76.2692
																				62.8229		51.8297
																				63.7271		39.5718
																				89.9801		20.1184
																				53.2591		36.4029
																				60.6001		59.2525
																				69.5708		41.0961
																				46.6198		44.2416
																				31.429		51.3131
																				62.1149		70.4677
																				46.3034		58.88
																				42.1621		45.6636
																				81.0868		40.9108
																				55.1649		39.3905
																				50.5405		60.7954
																				56.1382		68.68
																				52.554		46.8758
																				78.9816		56.8828
																				32.5731		35.2611
																				54.5645		39.9692
																				64.8718		56.3379
																				59.4633		38.3206
																				57.3085		46.9118
																				43.2955		71.1195
																				57.8209		78.2356
																				75.5451		48.3337
																				37.1331		45.4637
																				82.1252		73.7553
																				66.031		56.765
																				59.5777		58.9203
																				87.3331		70.0556
																				55.1962		78.3224
																				47.4472		50.4367
																				63.4614		55.4482
																				59.2425		72.4293
																				93.4244		52.8683
																				57.1937		55.9759
																				56.273		10.6843
																				45.373		38.4007
																				38.5064		64.7101
																				52.9289		29.0133
																				48.9649		51.3966
																				64.0411		50.3673
																				44.2008		0.529886
																				62.9318		54.649
																				67.8308		47.98
																				51.3034		58.1943
																				53.3211		23.4334
																				39.6456		71.4998
																				64.8538		64.9535
																				50.8647		65.8478
																				48.8089		58.0135
																				47.9086		67.1793
																				96.0755		28.2801
																				64.3808		43.449
																				43.3717		68.5438
																				63.559		61.1181
																				93.5196		47.9089
																				50.5027		58.1224
																				116.537		43.4118
																				64.2582		56.9963
																				79.5836		34.0749
																				78.9075		62.6665
																				64.1219		79.0308
																				102.799		79.7011
																				66.5061		64.2603
																				80.4922		68.2551
