# Supplementary material for: Conditional and unconditional components of aversively motivated freezing, flight and darting in mice
Source: eLife. 2022 May 26;11:e75663. doi: 10.7554/eLife.75663 (PMC9173745; doi:10.7554/eLife.75663)
Supplement: Figure 10—source data 1. [file elife-75663-fig10-data1.xlsx]

## Sheet: Sheet1
Analysis of ability for cues/shocks to break up freezing behavior
Freezing % Extracted via VideoFreeze
Shown for Shock Only Tone Test and Shock Only Noise Test groups of Experiment 2
Shown on top is the % Freezing during the first trial of Test Day 3, including CS freezing levels
Shown below is the % Freezing during the first trial of Acquisition Day 3, including US freezing levels
As shown in figure 10
% Freezing, broken up by CS during Test Day 3
Group	Animal	BL	PreCS	CS	ITI1	ITI2	ITI3	ITI4	ITI5	ITI6	ITI7	ITI8
Shock Only Tone Test	1.1	91.3	87.67	0	28.67	95	99.67	100	100	100	100	100
	2.1	63.44	30	12.67	64	96.67	93	89	100	88	99	87.67
	3.1	92.77	100	0	69	48.33	70.67	100	100	100	100	100
	4.1	85.91	68.67	0	95	100	100	100	91.67	100	100	100
	5.1	89.84	89.67	15.67	100	100	99	100	100	100	100	100
	6.1	94.37	100	95	95.67	100	99.33	64	81.67	95.67	91	82.33
	7.1	97.74	100	23.67	100	100	100	100	100	100	100	100
	8.1	82.46	45.67	40.33	66.67	88	92.67	100	90.67	100	100	100
Shock Only Noise Test	1.2	84.51	100	23.33	79.67	92	100	100	100	89.33	90.67	92.67
	2.2	85.95	99	71	81.33	73	20.33	81.33	76.33	74	85	100
	3.2	86.39	95.33	87	65	84	83.33	12.67	18.67	46.67	57.67	62
	4.2	79.11	49.33	50.67	84.33	50.67	91	100	100	98	100	98
	5.2	96.28	100	50.67	99.67	84.67	100	100	79.33	88	100	100
	6.2	99.75	100	100	38	100	80.33	100	100	58	0	88.33
	7.2	82.09	99	0	37.33	57	69	34.67	55.33	73	75.33	57
	8.2	89.26	100	100	100	100	100	48.67	97.33	99	80	71.67
% Freezing, broken up by US during Acquisition Day 2
Group	Animal	BL	PreUS	Shock	ITI1	ITI2	ITI3	ITI4	ITI5	ITI6	ITI7	ITI8
Shock Only Tone Test	1.1	73.85	72	0	0	33.67	82	84.67	76.67	46.67	88.33	24.67
	2.1	94.2	98	0	0	0	47.67	43.33	98	80	97	100
	3.1	96.08	100	0	15.67	91	100	100	100	100	100	100
	4.1	80.82	100	0	0	24.33	67	97.67	26	87.67	100	100
	5.1	83.8	63.33	0	0	26	68.67	36.33	46	40.33	77	85.67
	6.1	74.95	84	0	0	78.33	97	99.33	100	76.33	100	99
	7.1	94.72	100	0	12	60	65	69.33	94	99.33	88.33	99.67
	8.1	84.33	87.67	0	0	0	28.33	100	70.67	100	67.67	47.33
Shock Only Noise Test	1.2	88.62	100	0	0	0	0	10.33	88.67	100	100	57.67
	2.2	81.42	100	0	81.67	100	100	100	97	73.33	100	99.33
	3.2	48.45	92.67	0	35.33	72	76	10.67	74	96.33	94.67	84.33
	4.2	67.53	100	0	0	0	0	76.67	66.67	96	100	92
	5.2	94.52	100	0	25.67	99.67	100	100	100	100	100	100
	6.2	99.08	100	0	47.67	88	100	100	100	41.33	50.67	79.67
	7.2	79.73	100	0	0	0	0	52.67	85.33	72	92.33	87
	8.2	76.17	77.33	0	26.67	100	73.33	45.33	58	100	83.67	100
