# Supplementary material for: Conditional and unconditional components of aversively motivated freezing, flight and darting in mice
Source: eLife. 2022 May 26;11:e75663. doi: 10.7554/eLife.75663 (PMC9173745; doi:10.7554/eLife.75663)
Supplement: Figure 11—source data 1. [file elife-75663-fig11-data1.xlsx]

## Sheet: acq-darting
Analysis of Potential Sex Differences in PAR and Darting
Data are included for all animals which receieved noise-shock pairings across all experiments (n=15 females; 16 males)
As seen in Figure 11
DARTING on Acquisition Days 1 and 2
	Day 1
	Female																Male
BL	2.33333	1	0		0	0.333333	1.66667	3.66667	1.33333	0	2.33333	0	2	1.66667	1.66667	2.66667	0.333333	0.666667	0	0.333333	1.66667	0.333333	0.666667	0	1	0.333333	0.333333	2	0.666667	0.333333	0.333333	0.333333
1	0	0	0		6	0	0	12	0	0	6	0	6	6	0	18	0	0	0	0	0	0	6	6	0	0	0	6	6	0	6	0
2	6	0	0		0	0	6	6	0	0	6	0	6	0	0	0	0	0	0	0	6	0	6	0	0	0	6	0	0	0	0	0
3	6	0	6		0	0	0	6	0	0	6	18	0	0	0	0	0	12	0	0	12	0	6	0	0	6	6	0	6	6	0	0
4	6	0	12		0	0	6	6	0	0	12	18	0	6	0	6	6	12	6	6	0	12	6	0	0	6	6	12	0	18	12	6
5	0	0	6		0	0	0	6	6	12	0	12	18	6	0	18	6	6	0	6	6	6	6	0	12	6	18	6	0	0	12	0
avg	3.6	0	4.8		1.2	0	2.4	7.2	1.2	2.4	6	9.6	6	3.6	0	8.4	2.4	6	1.2	2.4	4.8	3.6	6	1.2	2.4	3.6	7.2	4.8	2.4	4.8	6	1.2
	Day 2
	Female																Male
BL	0	0	0.333333		0	0	0	0	0	0	0.333333	0.666667	0	0	0	0	0	0	0	0	0	0	0.333333	0	0	0	0	0	0	0	0	0
1	12	6	0		12	0	6	6	6	6	6	18	6	12	0	18	6	12	6	0	12	12	12	12	24	0	12	12	18	12	6	18
2	6	12	6		0	0	0	0	0	0	0	18	18	6	12	6	6	6	6	0	12	18	12	18	6	6	12	18	18	12	24	12
3	0	12	12		6	0	6	0	0	6	12	6	12	6	12	12	0	0	6	6	0	6	0	0	0	6	24	12	6	12	6	6
4	0	12	12		0	0	6	12	6	6	0	6	18	6	6	6	6	6	0	6	0	6	0	0	12	12	12	6	12	6	24	0
5	12	6	12		0	6	12	6	12	12	6	12	12	6	18	12	12	0	0	6	12	6	6	12	0	6	12	6	6	12	6	6
avg	6	9.6	8.4		3.6	1.2	6	4.8	4.8	6	4.8	12	13.2	7.2	9.6	10.8	6	4.8	3.6	3.6	7.2	9.6	6	8.4	8.4	6	14.4	10.8	12	10.8	13.2	8.4

## Sheet: test-darting
Analysis of Potential Sex Differences in PAR and Darting
Data are included for all animals which receieved noise-shock pairings across all experiments (n=15 females; 16 males)
As seen in Figure 11
DARTING on Test Day 3
	Female																Male
BL	0	0.333333	0.333333		0	0	0	0.333333	0	0	0	0.333333	2.33333	0	0	0	0.333333	0	0	0	0	0	0	0	1.33333	0.333333	0	0	0	0	0	0
1	6	0	0		6	0	0	0	6	18	6	18	0	6	6	12	12	0	12	0	12	0	6	0	12	18	6	6	6	12	6	0
2	0	6	0		0	0	0	0	6	6	0	12	0	6	0	0	6	0	0	0	0	6	0	0	12	12	12	6	12	0	12	0
3	0	6	0		0	0	0	0					0	6	0	6	0	0	6	6	0	0	0	0					0	6	12	0
4	0	6	0		0	0	0	0									6	0	12	0	6	0	0	0
5	0	0	0		0	0	0	0									0	0	0	0	12	0	0	0
6	0	0	0		6	6	0	0									0	0	6	0	6	0	0	0
7	0	0	6		0	0	0	0									0	0	0	0	0	0	18	0
8	18	0	6		0	0	0	0									0	6	0	0	0	0	6	0
9	0	0	6		0	0	0	0									0	0	0	0	0	0	6	0
10	6	0	0		0	0	0	0									0	0	0	0	6	0	0	6
11	0	0	12		0	0	0	0									0	0	6	0	0	0	0	0
12	0	0	12		0	0	0	0									6	0	6	0	6	0	6	6
13	6	0	6		0	0	0	0									0	6	0	0	0	0	6	6
14	0	0	6		0	0	0	0									0	0	6	0	0	0	0	0
15	0	0	0		6	0	0	0									0	0	6	0	0	0	0	6
16	0	0	6		0	0	0	0									0	0	0	0	0	0	0	0
avg	2.25	1.125	3.75		1.125	0.375	0	0	6	12	3	15	0	6	2	6	1.875	0.75	3.75	0.375	3	0.375	3	1.5	12	15	9	6	6	6	10	0

## Sheet: acq-PAR
Analysis of Potential Sex Differences in PAR and Darting
Data are included for all animals which receieved noise-shock pairings across all experiments (n=15 females; 16 males)
As seen in Figure 11
PAR on Acquisition Days 1 and 2
	Day 1
	Female																Male
1	0.43	0.48	0.46						0.4919	0.5408	0.5748	0.4832	0.541	0.542	0.602	0.534	0.49	0.33	0.35	0.48					0.497	0.5308	0.5279	0.5019	0.565	0.077	0.678	0.641
2	0.66	0.28	0.88						0.4202	0.5	0.6425	0.5573	0.691	0.114	0.582	0.847	0.28	0.65	0.51	0.75					0.5126	0.9258	0.6773	0.5137	0.675	0.88	0.631	0.535
3	0.93	0.81	0.98						0.6417	0.6666	0.9214	0.9696	0.764	0.917	0.964	0.963	1	0.98	0.31	0.71					0.6386	0.9995	0.9982	0.9662	1	1	0.968	0.999
4	0.73	1	0.91						0.6543	0.9946	0.8958	1	0.984	1	0.911	0.931	0.9	0.98	0.98	0.97					0.6147	0.9971	1	0.9998	1	0.998	0.995	1
5	0.76	1	1						0.9658	0.9986	0.917	0.9763	0.98	1	0.356	0.96	0.69	0.98	0.68	0.96					1	0.9996	1	1	0.999	0.989	0.969	0.993
avg	0.702	0.714	0.846						0.63478	0.74012	0.7903	0.79728	0.792	0.7146	0.683	0.847	0.672	0.784	0.566	0.774					0.65258	0.89056	0.84068	0.79632	0.8478	0.7888	0.8482	0.8336
	Day 2
	Female																Male
1	0.92	0.66	0.87						1	0.9989	0.982	1	0.99	1	0.25	1	0.93	1	0.94	0.76					0.9316	0.9988	1	0.925	1	1	1	0.99
2	0.88	1	0.95						0.588	0.9978	0.9513	0.9959	0.96	1	1	0.76	0.93	0.94	0.95	0.83					1	0.9998	0.9742	0.9506	1	1	1	1
3	0.85	1	0.92						1	0.9985	0.9627	0.7854	0.88	1	1	0.64	0.53	0.93	0.87	1					1	0.9998	1	0.9494	1	1	1	1
4	0.95	1	0.97						0.9056	0.9977	0.8376	1	0.98	1	1	0.98	0.89	0.92	0.82	1					0.9514	0.9997	1	0.9992	1	1	1	1
5	1	1	1						1	0.9996	0.9458	1	0.99	1	1	1	0.9	0.39	0.88	0.99					1	0.9998	1	0.9989	1	1	1	1
avg	0.92	0.932	0.942						0.89872	0.9985	0.93588	0.95626	0.96	1	0.85	0.876	0.836	0.836	0.892	0.916					0.9766	0.99958	0.99484	0.96462	1	1	1	0.998

## Sheet: test-PAR
Analysis of Potential Sex Differences in PAR and Darting
Data are included for all animals which receieved noise-shock pairings across all experiments (n=15 females; 16 males)
As seen in Figure 11
PAR at Test Day 3
	Female																Male
1	0.82	0.81	0.93		0.8	0.5	1	0.92	0.9985	0.9358	0.9234	1	0.558	0.886	0.95	0.977	0.9	0.88	1	0.93	0.95	0.98	0.94	0.79	1	0.9989	1	0.9525	1	0.985	0.996	0.342
2	0.78	0.6	0.92		1	0.28	0.9	0.42	0.939	0.9987	0.75	0.9993	0.783	0.999	0.516	1	0.67	0.16	0.89	0.74	0.32	1	1	0.59	0.9997	1	1	0.9511	0.775	0.998	1	0.903
3	0.19	1	1		0.79	0.5	0.55	0.99					0.68	1	0.948	1	0.53	0.49	0.97	1	0.71	1	1	0.5					1	1	0.998	1
4	1	1	0.72		0.75	0.5	0.32	0.77									0.74	0.47	0.94	0.91	0.94	1	0.91	0.62
5	0.7	0.93	0.9		1	0.5	0.12	0.86									0.73	0.14	0.25	0.75	0.79	1	0.75	0.67
6	0.58	0.51	1		0.67	0.64	1	0.46									0.58	0.19	0.81	0.87	0.91	0.59	0.98	0.73
7	0.5	0.57	0.82		0.79	0.42	0.69	0.35									0.19	0.64	0.51	0.71	0.54	0.88	0.99	0.6
8	0.96	0.76	0.97		0.39	0.5	0.46	0.73									0.41	0.86	0.85	0.92	0.48	0.99	0.87	0.49
9	0.62	1	0.9		0.63	1	1	0.64									0.52	0.54	0.58	1	0.61	0.95	0.94	0.73
10	0.72	1	0.8		0.45	0.5	0.88	0.7									0.47	0.48	0.64	0.86	0.91	0.8	0.78	0.66
11	0.55	0.99	0.8		0.66	0.5	0.63	0.35									0.82	0.28	0.63	0.42	0.47	0.61	0.52	0.69
12	0.44	0.3	0.98		0.57	0.44	0.54	0.78									0.94	0.34	0.87	0.71	0.92	1	0.87	0.8
13	0.91	0.5	0.77		0.91	0.45	0.16	0.47									0.64	0.79	0.59	0.73	0.55	1	0.85	0.66
14	0.89	0.27	0.82		0.59	0.05	0.48	0.72									0.12	0.38	0.56	0.7	0.41	0.51	0.43	0.54
15	0.55	0.21	0.81		0.68	0.72	0.96	0.36									0.48	0.44	0.79	0.76	0.53	0.54	0.89	0.76
16	0.25	0.38	0.96		0.63	0.29	0.48	0.42									0.67	0.23	0.62	0.83	0.53	0.22	0.71	0.43
avg	0.65375	0.676875	0.88125		0.706875	0.486875	0.635625	0.62125	0.96875	0.96725	0.8367	0.99965	0.673667	0.961667	0.804667	0.992333	0.588125	0.456875	0.71875	0.8025	0.660625	0.816875	0.839375	0.64125	0.99985	0.99945	1	0.9518	0.925	0.994333	0.998	0.748333
