# Supplementary figures and images for: Conditional and unconditional components of aversively motivated freezing, flight and darting in mice
Source: eLife journal article supplement (doi:10.7554/elife.75663), 2022-05-26

10s Tone → 10s Noise → 1s Shock

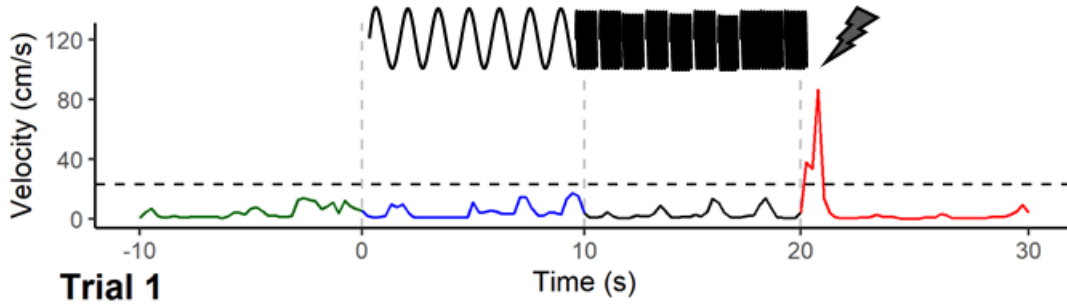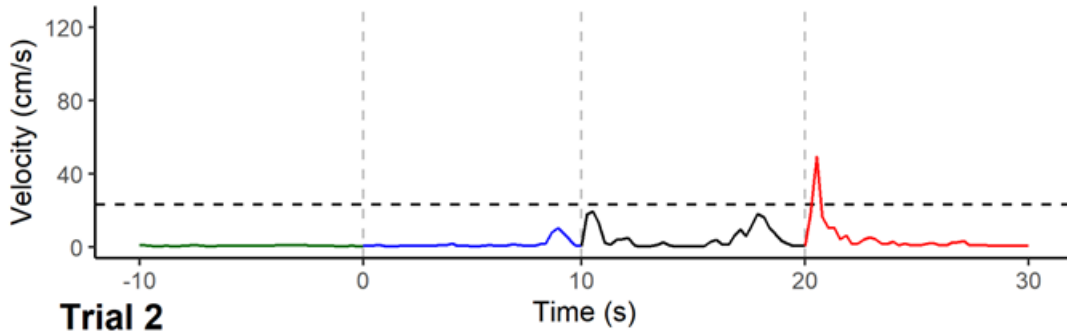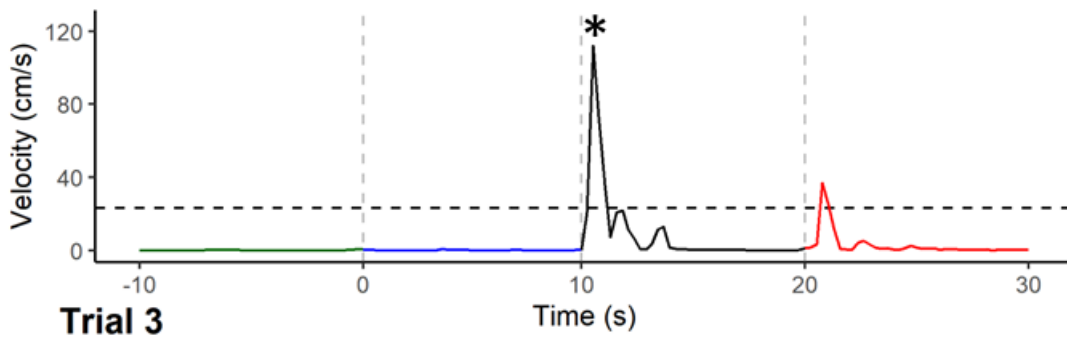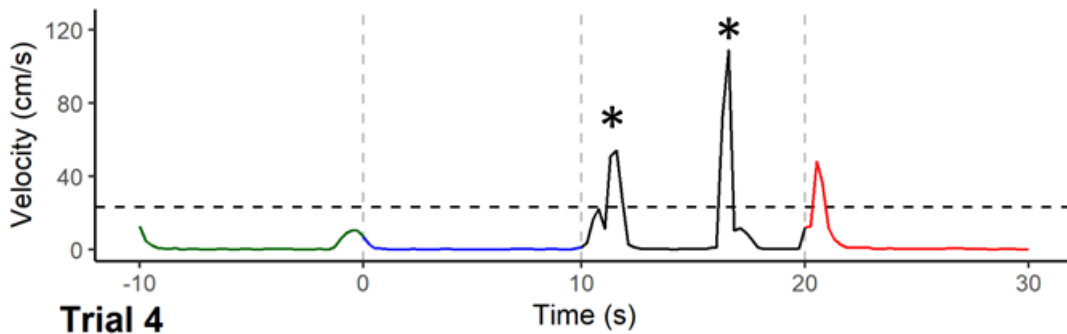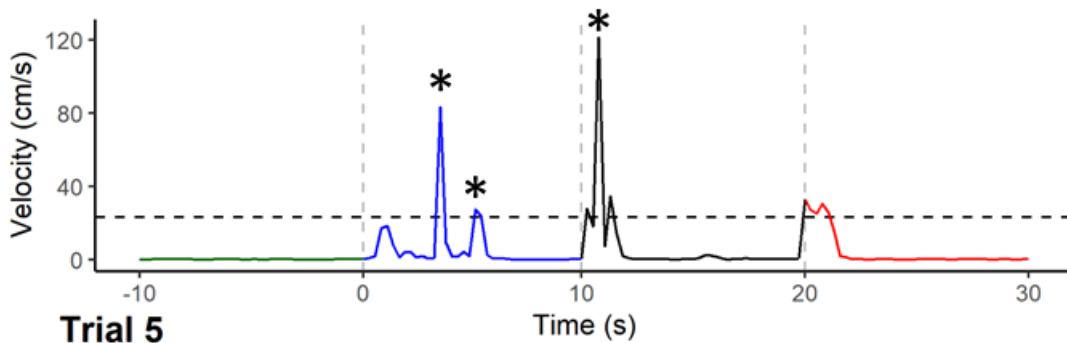

Stimulus Period — PreCS — Tone — White Noise — Shock

Supplement: supp [file elife-75663-supp-v1.zip]
